# Supplementary material for: Insights into the regulation of human CNV-miRNAs from the view of their target genes
Source: PubMed Central journal article supplement (PMC3582595; doi:10.1186/1471-2164-13-707), 2012-12-18
Supplement: 1471-2164-13-707-S1.pdf [file 1471-2164-13-707-S1.pdf]

---

**Ensembl Gene ID    miRNA Family ID**

---

|                 |          |
|-----------------|----------|
| ENSG00000000003 | CCAGUGC  |
| ENSG00000000003 | CUCUUC   |
| ENSG00000000003 | UCCAGUU  |
| ENSG00000000003 | UUCAAAU  |
| ENSG00000000005 | AUUCAUU  |
| ENSG00000000457 | CUUUGGU  |
| ENSG00000000457 | GAGGUAG  |
| ENSG00000000457 | UUGGCAC  |
| ENSG00000000938 | UAUAAAAG |
| ENSG00000001084 | ACAGUAU  |
| ENSG00000001084 | AGGGUCU  |
| ENSG00000001084 | CUGGAAA  |
| ENSG00000001084 | GGAAUGU  |
| ENSG00000001084 | GUUAAUG  |
| ENSG00000001084 | UACAAAG  |
| ENSG00000001084 | UCCAGAG  |
| ENSG00000001084 | UCUGGAA  |
| ENSG00000001084 | UUGGUCC  |
| ENSG00000001167 | AAGUGCA  |
| ENSG00000001167 | AAUCUCU  |
| ENSG00000001167 | AGUGGUU  |
| ENSG00000001167 | CUUCACC  |
| ENSG00000001167 | GACCCUG  |
| ENSG00000001167 | UGAAAUG  |
| ENSG00000001167 | UGAGAAG  |
| ENSG00000001167 | UGCCAGC  |
| ENSG00000001460 | GAGAACC  |
| ENSG00000001561 | AAGUGCA  |
| ENSG00000001561 | AGUGCAA  |
| ENSG00000001561 | GUGCAA   |
| ENSG00000001561 | UACAAAG  |
| ENSG00000001617 | AAUACUG  |
| ENSG00000001617 | AGCCAGU  |
| ENSG00000001617 | AUAUUAU  |
| ENSG00000001617 | CCAGUGU  |
| ENSG00000001617 | UGUCUUU  |
| ENSG00000001626 | AGUGCCG  |
| ENSG00000001626 | AGUGCCU  |
| ENSG00000001629 | AAGGCAC  |
| ENSG00000001629 | AAGUGCA  |
| ENSG00000001629 | ACACACU  |
| ENSG00000001629 | ACAUUAC  |
| ENSG00000001629 | CAUGGGU  |
| ENSG00000001629 | GAGUAUU  |
| ENSG00000001629 | GGGUGGU  |
| ENSG00000001629 | GGUGGUU  |
| ENSG00000001629 | UCAAGUA  |
| ENSG00000001629 | UCACAGU  |
| ENSG00000001629 | UGGCCAC  |
| ENSG00000001630 | UCAUUCG  |
| ENSG00000001631 | AAAGCUG  |
| ENSG00000001631 | AAUUAUU  |
| ENSG00000001631 | ACACACU  |
| ENSG00000001631 | AUAAAAGU |
| ENSG00000001631 | AUAUAAC  |
| ENSG00000001631 | CUCAAAC  |
| ENSG00000001631 | UGAAAUG  |
| ENSG00000001631 | UGAGAAG  |
| ENSG00000001631 | UGAGAAU  |
| ENSG00000001631 | UGUGCUU  |
| ENSG00000001631 | UUCAAAU  |
| ENSG00000002016 | GUCCAGA  |

|                 |         |
|-----------------|---------|
| ENSG00000002330 | UUCCGGC |
| ENSG00000002587 | ACUGUAG |
| ENSG00000002587 | AUGGCAC |
| ENSG00000002587 | GGAUUUC |
| ENSG00000002587 | GUGAAUG |
| ENSG00000002587 | UACAAAG |
| ENSG00000002746 | AUUGCAC |
| ENSG00000002746 | GAGGUAU |
| ENSG00000002746 | GUAAACA |
| ENSG00000002746 | UGCAUAG |
| ENSG00000002746 | UGCAUUA |
| ENSG00000002834 | AAAGUGC |
| ENSG00000002834 | AAGUGCA |
| ENSG00000002834 | ACAGGUG |
| ENSG00000002834 | AGCACCA |
| ENSG00000002834 | AGGCAGG |
| ENSG00000002834 | AGGGAGG |
| ENSG00000002834 | CACAGUG |
| ENSG00000002834 | CACCAGC |
| ENSG00000002834 | CCAGGAG |
| ENSG00000002834 | CUUUGGU |
| ENSG00000002834 | GAGAUGA |
| ENSG00000002834 | GUGCUUG |
| ENSG00000002834 | UCACAGU |
| ENSG00000002834 | UCCAGUU |
| ENSG00000002834 | UCCUGU  |
| ENSG00000002834 | UGAAAUG |
| ENSG00000002834 | UGAGUCU |
| ENSG00000002834 | UGAUCCA |
| ENSG00000002834 | UGUGCUU |
| ENSG00000002919 | GAGCCCU |
| ENSG00000003056 | AAAGUGC |
| ENSG00000003056 | AACAUUC |
| ENSG00000003056 | AAGUGCA |
| ENSG00000003056 | AGUGCAA |
| ENSG00000003056 | CCAGUGC |
| ENSG00000003056 | CCUGAG  |
| ENSG00000003056 | GAGAUGA |
| ENSG00000003056 | UCCCUUG |
| ENSG00000003096 | AGCAAAA |
| ENSG00000003096 | AGCAGCU |
| ENSG00000003096 | GCCCUUA |
| ENSG00000003096 | UGUGCUU |
| ENSG00000003137 | AAAGUGC |
| ENSG00000003137 | AAGAACC |
| ENSG00000003137 | ACAAUAU |
| ENSG00000003137 | ACAUUCA |
| ENSG00000003137 | ACCCGUA |
| ENSG00000003137 | AGCAGCG |
| ENSG00000003137 | AGCAGCU |
| ENSG00000003137 | AGUACUG |
| ENSG00000003137 | AUAAAGU |
| ENSG00000003137 | AUAAUAC |
| ENSG00000003137 | CAAAACU |
| ENSG00000003137 | CAGACAG |
| ENSG00000003137 | CAUAUUG |
| ENSG00000003137 | CUCACAC |
| ENSG00000003137 | GGCAGGG |
| ENSG00000003137 | GUGGGGA |
| ENSG00000003137 | UAAUGCU |
| ENSG00000003137 | UUGUGUC |
| ENSG00000003137 | UUUCAAC |
| ENSG00000003147 | CUUUGGU |
| ENSG00000003147 | GACCCUG |

|                 |         |
|-----------------|---------|
| ENSG00000003147 | UGGCUGC |
| ENSG00000003249 | GUGCUUG |
| ENSG00000003249 | UGUGCUU |
| ENSG00000003393 | AACAUUC |
| ENSG00000003393 | AGCAGCU |
| ENSG00000003393 | AUCCUUU |
| ENSG00000003393 | CCAGUGC |
| ENSG00000003393 | UCAAGUA |
| ENSG00000003400 | ACAUUCA |
| ENSG00000003400 | UCCAGUU |
| ENSG00000003436 | CACAGUG |
| ENSG00000003436 | GGCUCAG |
| ENSG00000003436 | UCACAGG |
| ENSG00000003987 | ACAUUCA |
| ENSG00000003987 | UUCUAAU |
| ENSG00000003989 | AGCAAAA |
| ENSG00000003989 | AGCUGCC |
| ENSG00000003989 | CAGCAAA |
| ENSG00000003989 | CUCCAUU |
| ENSG00000003989 | CUUACAG |
| ENSG00000003989 | GAAACAU |
| ENSG00000003989 | GGAAUGU |
| ENSG00000003989 | GGCAGUG |
| ENSG00000003989 | GGCAUUG |
| ENSG00000003989 | UUGGUCC |
| ENSG00000004059 | ACCACAG |
| ENSG00000004059 | AGCACCA |
| ENSG00000004059 | AGGCAGG |
| ENSG00000004059 | GGAGUCC |
| ENSG00000004139 | CUGGACU |
| ENSG00000004139 | GGCAGGG |
| ENSG00000004142 | AGGCAGG |
| ENSG00000004142 | CAGCUGG |
| ENSG00000004142 | CCCCUGG |
| ENSG00000004142 | CUGCAGG |
| ENSG00000004142 | CUUGGAG |
| ENSG00000004142 | GCAGCAU |
| ENSG00000004142 | GGGUCUU |
| ENSG00000004142 | GUGACAG |
| ENSG00000004142 | UGCCCG  |
| ENSG00000004142 | UUCUGCA |
| ENSG00000004142 | UUGGAGG |
| ENSG00000004399 | AAAGAAU |
| ENSG00000004399 | AUAAAGU |
| ENSG00000004399 | AUAUAAC |
| ENSG00000004399 | CACAGUG |
| ENSG00000004399 | CCAGUGC |
| ENSG00000004399 | GAGGUAG |
| ENSG00000004399 | GAGGUAU |
| ENSG00000004399 | GGAUGAG |
| ENSG00000004399 | UAAUAUC |
| ENSG00000004399 | UCACAGG |
| ENSG00000004399 | UCCAGUU |
| ENSG00000004455 | AAAGCUG |
| ENSG00000004455 | AAGGCAC |
| ENSG00000004455 | AGAUAAA |
| ENSG00000004455 | AGUGCUG |
| ENSG00000004455 | CAGUUAC |
| ENSG00000004455 | CCCUGUU |
| ENSG00000004455 | CCUUCUG |
| ENSG00000004455 | CUGCCC  |
| ENSG00000004455 | CUUUGGU |
| ENSG00000004455 | GCAGCAU |
| ENSG00000004455 | GGCAAGA |

|                 |         |
|-----------------|---------|
| ENSG00000004455 | UCACAGU |
| ENSG00000004455 | UGGAGAU |
| ENSG00000004455 | UUGGUCC |
| ENSG00000004478 | AAAGGUA |
| ENSG00000004478 | AGCAAAA |
| ENSG00000004478 | CAAAACU |
| ENSG00000004478 | GCCUGGA |
| ENSG00000004478 | UACAAAG |
| ENSG00000004478 | UGCUCAC |
| ENSG00000004660 | AAUUUUA |
| ENSG00000004660 | CUGCUCA |
| ENSG00000004660 | GCAGCAU |
| ENSG00000004660 | GGAGGCA |
| ENSG00000004660 | GGAUGAG |
| ENSG00000004660 | GGUGGGC |
| ENSG00000004776 | CUGGCUC |
| ENSG00000004779 | AUACAAG |
| ENSG00000004799 | CAGUGCA |
| ENSG00000004799 | UAUCAGA |
| ENSG00000004799 | UGAUCCA |
| ENSG00000004799 | UUGACAC |
| ENSG00000004799 | UUGAUCA |
| ENSG00000004838 | GGGGCAG |
| ENSG00000004838 | UCUGGAG |
| ENSG00000004848 | AAAAGUA |
| ENSG00000004848 | AAAGUAC |
| ENSG00000004848 | AACAGUC |
| ENSG00000004848 | AAGUGCA |
| ENSG00000004848 | ACAUUAC |
| ENSG00000004848 | AGUGCAA |
| ENSG00000004848 | AUACAAG |
| ENSG00000004848 | CUACAAA |
| ENSG00000004848 | CUUUGGU |
| ENSG00000004848 | UACAAAG |
| ENSG00000004848 | UACAGUU |
| ENSG00000004848 | UCACAGU |
| ENSG00000004848 | UCCCUUG |
| ENSG00000004864 | UCCAGAG |
| ENSG00000004866 | AAAGCUG |
| ENSG00000004866 | GGGGGAA |
| ENSG00000004866 | UUCUUGU |
| ENSG00000004897 | AAAUCCC |
| ENSG00000004897 | ACAUUAC |
| ENSG00000004897 | ACAUUCA |
| ENSG00000004897 | AGCAAAA |
| ENSG00000004897 | CUCUUCC |
| ENSG00000004897 | GAAUUGU |
| ENSG00000004897 | GCAGCAU |
| ENSG00000004897 | GGAUUUC |
| ENSG00000004897 | GGAUUUU |
| ENSG00000004897 | UAAGACU |
| ENSG00000004897 | UCACACA |
| ENSG00000004897 | UCACAGG |
| ENSG00000004897 | UCACAGU |
| ENSG00000004897 | UCCUUGC |
| ENSG00000004897 | UGCAAAG |
| ENSG00000004939 | UUGGCAA |
| ENSG00000004939 | UUUCAAC |
| ENSG00000004948 | AAAUCCC |
| ENSG00000004948 | ACCCUGU |
| ENSG00000004948 | AGCACCA |
| ENSG00000004948 | AGCUGCC |
| ENSG00000004948 | CUGGAAA |
| ENSG00000004948 | GAGUCUU |

|                 |          |
|-----------------|----------|
| ENSG00000004948 | GGAGUCC  |
| ENSG00000004948 | GGCAAGA  |
| ENSG00000004948 | GUUAAUG  |
| ENSG00000004948 | UAUAAAG  |
| ENSG00000004948 | UGAAAGG  |
| ENSG00000004948 | UUCCUAG  |
| ENSG00000004948 | UUCUAAU  |
| ENSG00000004948 | UUGGCAA  |
| ENSG00000004948 | UUGGCAC  |
| ENSG00000004948 | UUGUGAC  |
| ENSG00000004961 | AAUACUG  |
| ENSG00000004975 | CACAGUG  |
| ENSG00000004975 | UAUUGCU  |
| ENSG00000004975 | UCACAGU  |
| ENSG00000005001 | UACAAAG  |
| ENSG00000005007 | AAAGAAU  |
| ENSG00000005007 | CACAGUG  |
| ENSG00000005007 | CCUGCUG  |
| ENSG00000005007 | CUACAAA  |
| ENSG00000005007 | CUCACAC  |
| ENSG00000005007 | CUCCCAA  |
| ENSG00000005007 | CUCCCAC  |
| ENSG00000005007 | CUCUUCC  |
| ENSG00000005007 | GAAAACA  |
| ENSG00000005007 | GAAGGAA  |
| ENSG00000005007 | GAGAUGA  |
| ENSG00000005007 | GCUACAU  |
| ENSG00000005007 | UAAUAUC  |
| ENSG00000005007 | UACAAAG  |
| ENSG00000005007 | UCUGGAA  |
| ENSG00000005007 | UCUGGAG  |
| ENSG00000005020 | AAAGCUG  |
| ENSG00000005020 | ACUGGCU  |
| ENSG00000005020 | AGCAAAA  |
| ENSG00000005020 | AUAU AAC |
| ENSG00000005020 | GGGGGAA  |
| ENSG00000005020 | UCAUUUG  |
| ENSG00000005020 | UCCUCU   |
| ENSG00000005020 | UGGGGGA  |
| ENSG00000005020 | UUCUAAU  |
| ENSG00000005020 | UUGGCAA  |
| ENSG00000005073 | AACACUG  |
| ENSG00000005073 | AAGUCAC  |
| ENSG00000005073 | AUAAUAC  |
| ENSG00000005073 | CACACCU  |
| ENSG00000005073 | CUUUGGU  |
| ENSG00000005073 | GGCAGGG  |
| ENSG00000005073 | GGUGGGC  |
| ENSG00000005073 | GUAAACA  |
| ENSG00000005073 | UCACAUU  |
| ENSG00000005073 | UCCUGU   |
| ENSG00000005073 | UCCUUGC  |
| ENSG00000005102 | AUGUAAU  |
| ENSG00000005102 | GGCUCAG  |
| ENSG00000005102 | GUCCAGA  |
| ENSG00000005108 | GUGCAAA  |
| ENSG00000005194 | AGCAGCA  |
| ENSG00000005238 | AAAAGUA  |
| ENSG00000005238 | AGGGAGG  |
| ENSG00000005238 | CAGGUGA  |
| ENSG00000005238 | CCAGGAG  |
| ENSG00000005238 | CUGACUC  |
| ENSG00000005238 | CUGCCCC  |
| ENSG00000005238 | GAGGUAG  |

|                |          |
|----------------|----------|
| ENSG0000005238 | GAGGUAU  |
| ENSG0000005238 | GAGUCUU  |
| ENSG0000005238 | GCCUGGA  |
| ENSG0000005238 | GGAGGCA  |
| ENSG0000005238 | GGCCUG   |
| ENSG0000005238 | GUGGCC   |
| ENSG0000005238 | UAUAAAG  |
| ENSG0000005238 | UCAAGUA  |
| ENSG0000005238 | UCCUGAG  |
| ENSG0000005238 | UGGCCCU  |
| ENSG0000005238 | UUUCAAC  |
| ENSG0000005249 | AUAUAAAC |
| ENSG0000005249 | AUCACUA  |
| ENSG0000005249 | AUUGCAC  |
| ENSG0000005249 | GGCAUUG  |
| ENSG0000005249 | UGCAUUAU |
| ENSG0000005339 | AAAAAUC  |
| ENSG0000005339 | AAAGAAU  |
| ENSG0000005339 | AACAUUC  |
| ENSG0000005339 | AAGUCUU  |
| ENSG0000005339 | AAGUGUG  |
| ENSG0000005339 | AAUACUG  |
| ENSG0000005339 | AAUGUUG  |
| ENSG0000005339 | AAUUGCU  |
| ENSG0000005339 | AAUUUUA  |
| ENSG0000005339 | ACAAUAU  |
| ENSG0000005339 | ACAUAGA  |
| ENSG0000005339 | AGAUGUG  |
| ENSG0000005339 | AGUGAUC  |
| ENSG0000005339 | AUACAAG  |
| ENSG0000005339 | AUAUAAC  |
| ENSG0000005339 | AUAUUAU  |
| ENSG0000005339 | CUAUACA  |
| ENSG0000005339 | CUGUUGA  |
| ENSG0000005339 | GAAAACA  |
| ENSG0000005339 | GAGUUGA  |
| ENSG0000005339 | GUUAAUG  |
| ENSG0000005339 | UAAUACA  |
| ENSG0000005339 | UACAAAG  |
| ENSG0000005339 | UAUAAAG  |
| ENSG0000005339 | UCCUAUA  |
| ENSG0000005339 | UGCAUAG  |
| ENSG0000005339 | UGUCUGC  |
| ENSG0000005339 | UGUCUGG  |
| ENSG0000005339 | UGUUGAA  |
| ENSG0000005339 | UUCAAGC  |
| ENSG0000005379 | AAGGCAC  |
| ENSG0000005379 | ACCACAG  |
| ENSG0000005379 | AGCAAAA  |
| ENSG0000005379 | AGUGCAA  |
| ENSG0000005379 | AUAAUAC  |
| ENSG0000005379 | CAGUGCA  |
| ENSG0000005379 | CCAGUGU  |
| ENSG0000005379 | CCCACCG  |
| ENSG0000005379 | CCCACCU  |
| ENSG0000005379 | CCUUCUU  |
| ENSG0000005379 | CUCCCAA  |
| ENSG0000005379 | CUUGGAG  |
| ENSG0000005379 | GAGGCAG  |
| ENSG0000005379 | GCUUCCU  |
| ENSG0000005379 | GUGCAAA  |
| ENSG0000005379 | UCCCACC  |
| ENSG0000005379 | UGGAGAU  |
| ENSG0000005469 | AGUGGUU  |

|                |         |
|----------------|---------|
| ENSG0000005469 | GAGGCUG |
| ENSG0000005469 | GUGCUUG |
| ENSG0000005469 | UGCAUAG |
| ENSG0000005469 | UGUUGAA |
| ENSG0000005469 | UUGAGGC |
| ENSG0000005483 | AAAACUG |
| ENSG0000005483 | AAAAGUA |
| ENSG0000005483 | AAAGUAC |
| ENSG0000005483 | AAUGCCC |
| ENSG0000005483 | ACAGUAU |
| ENSG0000005483 | ACAUUAC |
| ENSG0000005483 | CCAGUGC |
| ENSG0000005513 | AAAGUUU |
| ENSG0000005513 | UCACAGG |
| ENSG0000005513 | UCACAGU |
| ENSG0000005700 | UAUUGCU |
| ENSG0000005810 | AAAAAUC |
| ENSG0000005810 | AAAUGGU |
| ENSG0000005810 | AAAUUUC |
| ENSG0000005810 | ACAUUCA |
| ENSG0000005810 | CACUGUU |
| ENSG0000005810 | CUCAAAC |
| ENSG0000005810 | GAGGCAG |
| ENSG0000005810 | UGACAUC |
| ENSG0000005810 | UGUAUAA |
| ENSG0000005812 | ACAGGUG |
| ENSG0000005812 | UCCAGUU |
| ENSG0000005844 | ACUCCAG |
| ENSG0000005844 | UCUCCAA |
| ENSG0000005882 | CACUGUU |
| ENSG0000005882 | GUCUCUG |
| ENSG0000005882 | UGAGGAC |
| ENSG0000005884 | AAGGCAC |
| ENSG0000005884 | ACAGUAC |
| ENSG0000005884 | ACAGUAU |
| ENSG0000005884 | ACAUUCA |
| ENSG0000005884 | AGUAGUU |
| ENSG0000005884 | AUACAAG |
| ENSG0000005884 | CAGUAGA |
| ENSG0000005884 | CAGUAGU |
| ENSG0000005884 | CCAGUGC |
| ENSG0000005884 | CCCUGUC |
| ENSG0000005884 | CUACAGU |
| ENSG0000005884 | CUGCCCC |
| ENSG0000005884 | GAGAAGA |
| ENSG0000005884 | GCUACAU |
| ENSG0000005884 | GGCUCAG |
| ENSG0000005884 | GGGGCAG |
| ENSG0000005884 | GGUGGGC |
| ENSG0000005884 | UACAAAG |
| ENSG0000005884 | UGAGAAG |
| ENSG0000005889 | AACUACU |
| ENSG0000005889 | ACACACC |
| ENSG0000005889 | AGGGAGG |
| ENSG0000005889 | AUGUAAU |
| ENSG0000005889 | CAAAGUG |
| ENSG0000005889 | CUACAGU |
| ENSG0000005889 | CUUCACC |
| ENSG0000005889 | GCAUCCC |
| ENSG0000005889 | GUCAGUU |
| ENSG0000005889 | GUGCUUG |
| ENSG0000005889 | UAAUAGU |
| ENSG0000005889 | UAUAUGA |
| ENSG0000005889 | UCAAGUA |

|                |         |
|----------------|---------|
| ENSG0000005889 | UCACACA |
| ENSG0000005889 | UUUGCAA |
| ENSG0000005889 | UUUUUGC |
| ENSG0000005893 | AAAAAUC |
| ENSG0000005893 | AGCCAGU |
| ENSG0000005893 | GUUAGGA |
| ENSG0000005893 | UAAUGCU |
| ENSG0000005955 | AAGGCGC |
| ENSG0000005955 | AUGGCUU |
| ENSG0000005955 | CAGUAGU |
| ENSG0000005955 | UCACAUU |
| ENSG0000005961 | CAGCAGG |
| ENSG0000006007 | AAAAAUC |
| ENSG0000006007 | AUGCAUU |
| ENSG0000006007 | CUGCCCC |
| ENSG0000006007 | GCUAGCA |
| ENSG0000006007 | GGUGGUU |
| ENSG0000006007 | GUGCUUG |
| ENSG0000006007 | UGUGCUU |
| ENSG0000006015 | CAGCUGG |
| ENSG0000006025 | AAGGCAC |
| ENSG0000006025 | CUGCAGG |
| ENSG0000006025 | CUGCCCC |
| ENSG0000006025 | GGAGGCA |
| ENSG0000006025 | GGGGAGC |
| ENSG0000006025 | UGGGGGA |
| ENSG0000006042 | AGUGGUU |
| ENSG0000006042 | GAUUGUA |
| ENSG0000006047 | AAAACUG |
| ENSG0000006047 | ACUGGAU |
| ENSG0000006047 | AUGGCUU |
| ENSG0000006047 | CCUUCUG |
| ENSG0000006047 | CCUUCUU |
| ENSG0000006047 | CUCUGGG |
| ENSG0000006047 | GAGGUAG |
| ENSG0000006047 | GAGUCUU |
| ENSG0000006047 | GAGUUGG |
| ENSG0000006047 | GGAGGAG |
| ENSG0000006047 | GGCUCAG |
| ENSG0000006047 | UCCUGAG |
| ENSG0000006047 | UCUCAAG |
| ENSG0000006047 | UGAGUCU |
| ENSG0000006062 | AAAGUGC |
| ENSG0000006062 | AAGUGCU |
| ENSG0000006062 | AGUGCAA |
| ENSG0000006062 | AGUGCUU |
| ENSG0000006062 | CAAAGUG |
| ENSG0000006062 | GAGAACC |
| ENSG0000006062 | GGCAGGG |
| ENSG0000006062 | GUGCAAA |
| ENSG0000006062 | UCACAGG |
| ENSG0000006062 | UCACAGU |
| ENSG0000006062 | UGCAAAG |
| ENSG0000006062 | UUGAGGC |
| ENSG0000006075 | GAGGUAG |
| ENSG0000006118 | AGCACCA |
| ENSG0000006125 | AAGUGCA |
| ENSG0000006125 | AAUCUCU |
| ENSG0000006125 | ACAAGGU |
| ENSG0000006125 | ACCAGCA |
| ENSG0000006125 | ACUCAGG |
| ENSG0000006125 | AGUGGUU |
| ENSG0000006125 | AUGAGCU |
| ENSG0000006125 | GGUUACC |



|                 |          |
|-----------------|----------|
| ENSG00000006125 | UUCUGCA  |
| ENSG00000006125 | UUGGCAC  |
| ENSG00000006125 | UUGUGUC  |
| ENSG00000006194 | CUUUGGU  |
| ENSG00000006210 | ACUGCAG  |
| ENSG00000006210 | AGCACCA  |
| ENSG00000006210 | AGGGUUG  |
| ENSG00000006210 | AUGGCAC  |
| ENSG00000006210 | CAGCAGA  |
| ENSG00000006283 | UAUUGCU  |
| ENSG00000006283 | UUCUGCA  |
| ENSG00000006327 | CAA AUGC |
| ENSG00000006327 | GUGCAA   |
| ENSG00000006377 | AAAGUAU  |
| ENSG00000006377 | ACAUAU   |
| ENSG00000006377 | ACUCCAG  |
| ENSG00000006377 | GCCUGGA  |
| ENSG00000006377 | UAUAUGA  |
| ENSG00000006377 | UCAACAG  |
| ENSG00000006377 | UCCAGUU  |
| ENSG00000006432 | AAGUGCA  |
| ENSG00000006432 | AUCCCUU  |
| ENSG00000006432 | GGAAGAC  |
| ENSG00000006432 | GUCUCUG  |
| ENSG00000006432 | GUGGCC   |
| ENSG00000006432 | UAUCAGA  |
| ENSG00000006432 | UGGCCCU  |
| ENSG00000006432 | UGGCUGC  |
| ENSG00000006451 | ACAUUCA  |
| ENSG00000006451 | CAGUAGA  |
| ENSG00000006451 | GGCUCAG  |
| ENSG00000006459 | AAAACUG  |
| ENSG00000006459 | AAAUCCC  |
| ENSG00000006459 | AACAGUC  |
| ENSG00000006459 | AACCUGU  |
| ENSG00000006459 | AAGACAU  |
| ENSG00000006459 | AAUCUCA  |
| ENSG00000006459 | ACCCA UU |
| ENSG00000006459 | ACCUGGA  |
| ENSG00000006459 | ACUCCAG  |
| ENSG00000006459 | ACUGGCC  |
| ENSG00000006459 | ACUGUAG  |
| ENSG00000006459 | ACUGUUU  |
| ENSG00000006459 | AGCAGCU  |
| ENSG00000006459 | AGCCAGU  |
| ENSG00000006459 | AGGUUAU  |
| ENSG00000006459 | AGUGCAA  |
| ENSG00000006459 | AGUGGUU  |
| ENSG00000006459 | CACAGGG  |
| ENSG00000006459 | CAGGCUC  |
| ENSG00000006459 | CAGUCUG  |
| ENSG00000006459 | CAGUGCA  |
| ENSG00000006459 | CCUGUC   |
| ENSG00000006459 | CUACAAA  |
| ENSG00000006459 | CUAGUAA  |
| ENSG00000006459 | CUCCAGC  |
| ENSG00000006459 | CUGCAGG  |
| ENSG00000006459 | CUUUGGU  |
| ENSG00000006459 | GCCCUUA  |
| ENSG00000006459 | GCUAGCA  |
| ENSG00000006459 | GGAAGAC  |
| ENSG00000006459 | GGCAGUG  |
| ENSG00000006459 | GGGUGUU  |
| ENSG00000006459 | GGUUUAC  |

|                |          |
|----------------|----------|
| ENSG0000006459 | GUAACAG  |
| ENSG0000006459 | GUCCAGA  |
| ENSG0000006459 | GUGUGGC  |
| ENSG0000006459 | UAUAAAAG |
| ENSG0000006459 | UAUUGCU  |
| ENSG0000006459 | UGCAUAG  |
| ENSG0000006459 | UGCAUUAU |
| ENSG0000006459 | UGCUGAC  |
| ENSG0000006459 | UGGAUAA  |
| ENSG0000006459 | UGGGACA  |
| ENSG0000006459 | UUGGUCC  |
| ENSG0000006459 | UUGGUUC  |
| ENSG0000006468 | AACAGUC  |
| ENSG0000006468 | AAGGCAC  |
| ENSG0000006468 | AAGUGCA  |
| ENSG0000006468 | AAGUGCU  |
| ENSG0000006468 | AAUGCCC  |
| ENSG0000006468 | AAUGUUG  |
| ENSG0000006468 | ACAGUAC  |
| ENSG0000006468 | ACAGUAU  |
| ENSG0000006468 | ACUGGCU  |
| ENSG0000006468 | AGCAGCA  |
| ENSG0000006468 | AGCAUUC  |
| ENSG0000006468 | AGCUGCC  |
| ENSG0000006468 | AGUGCUG  |
| ENSG0000006468 | AUAUUAU  |
| ENSG0000006468 | CAGCUGG  |
| ENSG0000006468 | CAGUAGA  |
| ENSG0000006468 | CAGUCCA  |
| ENSG0000006468 | CAGUGCA  |
| ENSG0000006468 | GGAUUUU  |
| ENSG0000006468 | GUCACUC  |
| ENSG0000006468 | GUGAAUG  |
| ENSG0000006468 | GUGCAA   |
| ENSG0000006468 | UAAUGCU  |
| ENSG0000006468 | UACAAAG  |
| ENSG0000006468 | UCACAUU  |
| ENSG0000006468 | UCAUACA  |
| ENSG0000006468 | UCAUUUG  |
| ENSG0000006468 | UCCCACC  |
| ENSG0000006468 | UGAAGCU  |
| ENSG0000006468 | UGCAUUAU |
| ENSG0000006468 | UGCCAGC  |
| ENSG0000006468 | UGGAUAA  |
| ENSG0000006468 | UGGGUAC  |
| ENSG0000006530 | AGCAGCA  |
| ENSG0000006530 | UUGGUCC  |
| ENSG0000006576 | AAAGAGC  |
| ENSG0000006576 | AAAGCUG  |
| ENSG0000006576 | AAAGUGC  |
| ENSG0000006576 | AAGUGCA  |
| ENSG0000006576 | CUUUGGU  |
| ENSG0000006576 | UUGGUCC  |
| ENSG0000006634 | UAAUAUC  |
| ENSG0000006634 | UAUAAAAG |
| ENSG0000006652 | AAAAACC  |
| ENSG0000006695 | UGAAAUG  |
| ENSG0000006712 | CUGGGCA  |
| ENSG0000006715 | UCACAAG  |
| ENSG0000006715 | UCCUGAG  |
| ENSG0000006757 | AAAGAAU  |
| ENSG0000006831 | AAAGAGC  |
| ENSG0000006831 | AAAGUGC  |
| ENSG0000006831 | AACCUGG  |

|                |         |
|----------------|---------|
| ENSG0000006831 | AAGGCAC |
| ENSG0000006831 | AAGUGCA |
| ENSG0000006831 | ACAUUAC |
| ENSG0000006831 | AGCCAGU |
| ENSG0000006831 | AUACAAG |
| ENSG0000006831 | AUAUAAC |
| ENSG0000006831 | CAAAGUG |
| ENSG0000006831 | GAGGUAG |
| ENSG0000006831 | GUGCUUG |
| ENSG0000006831 | GUGUGGC |
| ENSG0000006831 | UCUGGAA |
| ENSG0000006831 | UGUGUGG |
| ENSG0000007047 | AAAAACC |
| ENSG0000007047 | AAAGUGC |
| ENSG0000007047 | AACGGCU |
| ENSG0000007047 | ACAAGGU |
| ENSG0000007047 | ACUGGAU |
| ENSG0000007047 | AGGCAGG |
| ENSG0000007047 | CAAAGUG |
| ENSG0000007047 | CAGCAGG |
| ENSG0000007047 | CAGCUGG |
| ENSG0000007047 | CAGGAAC |
| ENSG0000007047 | CAGGUGA |
| ENSG0000007047 | CCAGUGU |
| ENSG0000007047 | CGUUGGC |
| ENSG0000007047 | CUCCAGC |
| ENSG0000007047 | CUGCAGC |
| ENSG0000007047 | CUGCAGG |
| ENSG0000007047 | GAAGGAA |
| ENSG0000007047 | GCAGGUU |
| ENSG0000007047 | GCCUGGG |
| ENSG0000007047 | GCGGGUG |
| ENSG0000007047 | GGCAGCG |
| ENSG0000007047 | GGGGCAG |
| ENSG0000007047 | GGUGCGG |
| ENSG0000007047 | UGCCAGC |
| ENSG0000007047 | UGGAGAU |
| ENSG0000007047 | UGGGACA |
| ENSG0000007047 | UUCUGCA |
| ENSG0000007062 | AAAAGUA |
| ENSG0000007062 | ACACACU |
| ENSG0000007062 | GUAAACA |
| ENSG0000007168 | AAAGUGC |
| ENSG0000007168 | AAAUUUC |
| ENSG0000007168 | AACAUUC |
| ENSG0000007168 | AAGGCAC |
| ENSG0000007168 | AAGUGCA |
| ENSG0000007168 | ACAUUCA |
| ENSG0000007168 | ACUGUAG |
| ENSG0000007168 | AGUGCAA |
| ENSG0000007168 | AUCACUA |
| ENSG0000007168 | CACACCG |
| ENSG0000007168 | CACACCU |
| ENSG0000007168 | CAGUCUG |
| ENSG0000007168 | CCCUGAG |
| ENSG0000007168 | CUGGGCA |
| ENSG0000007168 | GCACCAU |
| ENSG0000007168 | GCAGAAG |
| ENSG0000007168 | GCAUCC  |
| ENSG0000007168 | GGAAUGU |
| ENSG0000007168 | GUAACAG |
| ENSG0000007168 | UAAUAUC |
| ENSG0000007168 | UCACCAC |
| ENSG0000007168 | UCUAGAG |

|                 |          |
|-----------------|----------|
| ENSG00000007168 | UGCCAGC  |
| ENSG00000007168 | UGGUACC  |
| ENSG00000007168 | UGUGUGG  |
| ENSG00000007174 | CUGCAGG  |
| ENSG00000007202 | AAAAAUC  |
| ENSG00000007202 | ACUGCAG  |
| ENSG00000007202 | CUGCAGC  |
| ENSG00000007202 | GGGUCUU  |
| ENSG00000007202 | UUGAUCA  |
| ENSG00000007237 | AAAACUG  |
| ENSG00000007237 | AAAGUAA  |
| ENSG00000007237 | AAAGUAC  |
| ENSG00000007237 | ACACACC  |
| ENSG00000007237 | ACACACU  |
| ENSG00000007237 | ACAUUCA  |
| ENSG00000007237 | ACCCAUI  |
| ENSG00000007237 | AGCACCA  |
| ENSG00000007237 | AGGUAGU  |
| ENSG00000007237 | AUGGCUU  |
| ENSG00000007237 | CAGCUGG  |
| ENSG00000007237 | CUAGUAA  |
| ENSG00000007237 | GAGGUAU  |
| ENSG00000007237 | GAUUGGU  |
| ENSG00000007237 | GCCUGAU  |
| ENSG00000007237 | GCUGGUG  |
| ENSG00000007237 | UCCUGAG  |
| ENSG00000007237 | UGCAAAG  |
| ENSG00000007312 | GUCUCUG  |
| ENSG00000007314 | AAGACAU  |
| ENSG00000007314 | CCUUCUG  |
| ENSG00000007314 | GGGGAGC  |
| ENSG00000007314 | GGGGCAG  |
| ENSG00000007314 | UAAGACG  |
| ENSG00000007314 | UAAGACU  |
| ENSG00000007314 | UCCCUUU  |
| ENSG00000007341 | AGCACCA  |
| ENSG00000007341 | AGGGAGG  |
| ENSG00000007341 | AUGCAUU  |
| ENSG00000007341 | CACACCG  |
| ENSG00000007341 | CACACCU  |
| ENSG00000007341 | CCCCUGG  |
| ENSG00000007341 | CUCACAC  |
| ENSG00000007341 | CUGCCCC  |
| ENSG00000007341 | CUGGGCA  |
| ENSG00000007341 | GACCCUG  |
| ENSG00000007341 | GAGACCU  |
| ENSG00000007341 | GCAGAAG  |
| ENSG00000007341 | GCUUCCU  |
| ENSG00000007341 | GGCGCCU  |
| ENSG00000007341 | UCACAUU  |
| ENSG00000007341 | UGCCAGC  |
| ENSG00000007350 | CUGCAGG  |
| ENSG00000007372 | AAAAGUA  |
| ENSG00000007372 | AAAGUUU  |
| ENSG00000007372 | AAGAACC  |
| ENSG00000007372 | CAA AUGC |
| ENSG00000007372 | GAUUGGU  |
| ENSG00000007372 | UAUAAUA  |
| ENSG00000007372 | UAUAUGA  |
| ENSG00000007372 | UCAUGAU  |
| ENSG00000007372 | UGGAUAA  |
| ENSG00000007372 | UUCUUGU  |
| ENSG00000007372 | UUGAUCA  |
| ENSG00000007372 | UUGGCAA  |

|                 |         |
|-----------------|---------|
| ENSG00000007372 | UUGGCAC |
| ENSG00000007372 | UUGUUCG |
| ENSG00000007376 | AAGGCAC |
| ENSG00000007384 | AAGGCAC |
| ENSG00000007384 | GGCAGCG |
| ENSG00000007384 | GGUGGUC |
| ENSG00000007392 | CACUCCU |
| ENSG00000007392 | GACCCUG |
| ENSG00000007392 | GGCUCAG |
| ENSG00000007402 | AAAGUUU |
| ENSG00000007402 | ACAAGGU |
| ENSG00000007402 | ACACACU |
| ENSG00000007402 | ACAUUCA |
| ENSG00000007402 | CAGCUGG |
| ENSG00000007402 | CAGUCCA |
| ENSG00000007402 | CAGUUAC |
| ENSG00000007402 | CUACAGU |
| ENSG00000007402 | CUGGGGG |
| ENSG00000007402 | CUUCACC |
| ENSG00000007402 | GAGAAAU |
| ENSG00000007402 | GAGCCCC |
| ENSG00000007402 | GAGGGGC |
| ENSG00000007402 | GGCAGUG |
| ENSG00000007402 | GGGGGAA |
| ENSG00000007402 | UACAGUU |
| ENSG00000007402 | UCACACA |
| ENSG00000007402 | UCUCCAA |
| ENSG00000007402 | UGAAGUG |
| ENSG00000007402 | UGGGGGA |
| ENSG00000007402 | UUGGCAA |
| ENSG00000007402 | UUUUUGC |
| ENSG00000007516 | UGAAGCU |
| ENSG00000007545 | AAAAACC |
| ENSG00000007545 | AAAGUGC |
| ENSG00000007545 | AUAUUAU |
| ENSG00000007545 | AUGCACC |
| ENSG00000007545 | AUGGCUU |
| ENSG00000007545 | CAAAGUG |
| ENSG00000007545 | CCCUGAG |
| ENSG00000007545 | UAUAAUA |
| ENSG00000007866 | AAUUUUA |
| ENSG00000007866 | ACAGUAC |
| ENSG00000007866 | AGGGAGG |
| ENSG00000007866 | AUAAUAC |
| ENSG00000007866 | CCCCAG  |
| ENSG00000007866 | GAGCCCU |
| ENSG00000007866 | GAGGUAG |
| ENSG00000007866 | GAGUGUG |
| ENSG00000007866 | GGAGUGU |
| ENSG00000007866 | UCCACA  |
| ENSG00000007923 | AAAAACC |
| ENSG00000007923 | AGAUAAA |
| ENSG00000007923 | AUCCUUG |
| ENSG00000007923 | CCUGCUG |
| ENSG00000007923 | UAUAAAG |
| ENSG00000007944 | AAAGUAU |
| ENSG00000007944 | AAAGUGC |
| ENSG00000007944 | AAGGCAC |
| ENSG00000007944 | AAGUCUU |
| ENSG00000007944 | AAUCUCA |
| ENSG00000007944 | AAUGCCC |
| ENSG00000007944 | AUAUAAC |
| ENSG00000007944 | AUGUCUG |
| ENSG00000007944 | AUUGCAC |

|                |         |
|----------------|---------|
| ENSG0000007944 | GUGACAG |
| ENSG0000007944 | GUGCCAC |
| ENSG0000007944 | UAAUAUC |
| ENSG0000007944 | UAUAUGA |
| ENSG0000007944 | UGCAAAG |
| ENSG0000007944 | UUGACAC |
| ENSG0000007952 | AAAUUUC |
| ENSG0000007968 | AAAACUG |
| ENSG0000007968 | AAAGUGC |
| ENSG0000007968 | AACAAAC |
| ENSG0000007968 | AAGUGCU |
| ENSG0000007968 | ACUCAGG |
| ENSG0000007968 | AGUGCAA |
| ENSG0000007968 | AGUGCUG |
| ENSG0000007968 | CAGCUGG |
| ENSG0000007968 | CCCUGAG |
| ENSG0000007968 | CUACAAA |
| ENSG0000007968 | CUCAGGG |
| ENSG0000007968 | CUCUGGG |
| ENSG0000007968 | GAGGUAG |
| ENSG0000007968 | GCUACAU |
| ENSG0000007968 | GCUGGUG |
| ENSG0000007968 | GGCAAGA |
| ENSG0000007968 | GUGAGGU |
| ENSG0000007968 | GUGUCAC |
| ENSG0000007968 | UACAAAG |
| ENSG0000007968 | UCCUGU  |
| ENSG0000008056 | ACCACAG |
| ENSG0000008056 | GAGAAAU |
| ENSG0000008056 | GUGCAA  |
| ENSG0000008056 | GUGGGGA |
| ENSG0000008083 | AAAAACC |
| ENSG0000008083 | AAAAGUA |
| ENSG0000008083 | AAGUAGC |
| ENSG0000008083 | ACAUUCA |
| ENSG0000008083 | ACCCUGU |
| ENSG0000008083 | ACUCCAG |
| ENSG0000008083 | AGCACCA |
| ENSG0000008083 | AGCAGCA |
| ENSG0000008083 | AGCAGCG |
| ENSG0000008083 | AGCUGCC |
| ENSG0000008083 | AGGCAGG |
| ENSG0000008083 | AUAAAGU |
| ENSG0000008083 | AUCCUU  |
| ENSG0000008083 | AUGGAUU |
| ENSG0000008083 | AUUGCAC |
| ENSG0000008083 | CCAUUAC |
| ENSG0000008083 | CUCCAUU |
| ENSG0000008083 | GCUGGUG |
| ENSG0000008083 | GGAUUUC |
| ENSG0000008083 | GGCUCUG |
| ENSG0000008083 | GUGCAA  |
| ENSG0000008083 | UCAAGUA |
| ENSG0000008083 | UCACAUU |
| ENSG0000008083 | UCUCACC |
| ENSG0000008083 | UGCAAAG |
| ENSG0000008083 | UGCAUAG |
| ENSG0000008083 | UUCUGCA |
| ENSG0000008118 | AUGGCUU |
| ENSG0000008118 | GACCUGG |
| ENSG0000008118 | GAGACCU |
| ENSG0000008130 | AAGUGUG |
| ENSG0000008130 | GGAAUGU |
| ENSG0000008130 | UGUGUGG |

|                |         |
|----------------|---------|
| ENSG0000008196 | AAAUGGU |
| ENSG0000008196 | AACUACU |
| ENSG0000008196 | AAGAACC |
| ENSG0000008196 | AAGGCGC |
| ENSG0000008196 | AAGUGCA |
| ENSG0000008196 | AAUUUUU |
| ENSG0000008196 | ACUGUUU |
| ENSG0000008196 | AGCCCUU |
| ENSG0000008196 | AUAAAGU |
| ENSG0000008196 | AUACAAG |
| ENSG0000008196 | AUGUAAU |
| ENSG0000008196 | CCAUUAC |
| ENSG0000008196 | GAGGUAU |
| ENSG0000008196 | GCAGAAG |
| ENSG0000008196 | GCCUGU  |
| ENSG0000008196 | GGAUUUU |
| ENSG0000008196 | GGUUGUC |
| ENSG0000008196 | GUGGCC  |
| ENSG0000008196 | UCUUGAG |
| ENSG0000008196 | UGCCUG  |
| ENSG0000008196 | UUGGUUC |
| ENSG0000008197 | AGCAGCA |
| ENSG0000008197 | CAGCAGA |
| ENSG0000008197 | CAGCAGG |
| ENSG0000008277 | GUAAACA |
| ENSG0000008282 | CAGCAA  |
| ENSG0000008282 | CAGUAGU |
| ENSG0000008282 | CCAUUAC |
| ENSG0000008282 | CUUACAG |
| ENSG0000008282 | GUAGUGU |
| ENSG0000008282 | UGUGCUU |
| ENSG0000008282 | UUGGCAA |
| ENSG0000008283 | ACUCAGC |
| ENSG0000008283 | GAAAACA |
| ENSG0000008300 | AAAAGUA |
| ENSG0000008300 | AAAGGUA |
| ENSG0000008300 | AAGGCAC |
| ENSG0000008300 | ACAUUCA |
| ENSG0000008300 | AGUAACA |
| ENSG0000008300 | AUGGCAC |
| ENSG0000008300 | CAGACAG |
| ENSG0000008300 | CUGCAGC |
| ENSG0000008300 | GCUGGUG |
| ENSG0000008300 | GGAAGCC |
| ENSG0000008300 | GGUUACC |
| ENSG0000008323 | ACCAGCA |
| ENSG0000008323 | GAGGUAU |
| ENSG0000008323 | GCCUGGG |
| ENSG0000008441 | AAAAACC |
| ENSG0000008441 | AAAUUUC |
| ENSG0000008441 | AAGGCAC |
| ENSG0000008441 | AAUCUCU |
| ENSG0000008441 | AAUGUUG |
| ENSG0000008441 | ACAUUAC |
| ENSG0000008441 | ACCCGGC |
| ENSG0000008441 | ACCCUGU |
| ENSG0000008441 | AGCACCA |
| ENSG0000008441 | AGGGAGG |
| ENSG0000008441 | AGUACUG |
| ENSG0000008441 | AUAAUAC |
| ENSG0000008441 | AUGCAUU |
| ENSG0000008441 | AUUGCAC |
| ENSG0000008441 | CAGCUGG |
| ENSG0000008441 | CAGUGCA |

|                |         |
|----------------|---------|
| ENSG0000008441 | CCAUUAC |
| ENSG0000008441 | CCCACCG |
| ENSG0000008441 | CCCACCU |
| ENSG0000008441 | CCCUGUU |
| ENSG0000008441 | CGAGGAC |
| ENSG0000008441 | CGUUGGC |
| ENSG0000008441 | CUCAAAC |
| ENSG0000008441 | CUCCAC  |
| ENSG0000008441 | CUGCAGC |
| ENSG0000008441 | CUGGCUC |
| ENSG0000008441 | CUUGUGU |
| ENSG0000008441 | GACCCUG |
| ENSG0000008441 | GCGGGUG |
| ENSG0000008441 | GGACCUG |
| ENSG0000008441 | GGAGAGA |
| ENSG0000008441 | GGAUUUU |
| ENSG0000008441 | GGCAUUG |
| ENSG0000008441 | GGCUGCG |
| ENSG0000008441 | UACAAAG |
| ENSG0000008441 | UAUAAUA |
| ENSG0000008441 | UAUUGCU |
| ENSG0000008441 | UCACAUU |
| ENSG0000008441 | UCCACC  |
| ENSG0000008441 | UCCGCUC |
| ENSG0000008441 | UGCAGCU |
| ENSG0000008441 | UGCAUUG |
| ENSG0000008441 | UGUAUAA |
| ENSG0000008441 | UUGGUUC |
| ENSG0000008441 | UUGUUCG |
| ENSG0000008441 | UUUUUGC |
| ENSG0000008513 | UGCUGAC |
| ENSG0000008516 | UCCAGAG |
| ENSG0000008710 | AAGUGCU |
| ENSG0000008710 | AGUGCUG |
| ENSG0000008710 | UGAGGAC |
| ENSG0000008735 | CACACCG |
| ENSG0000008735 | CACACCU |
| ENSG0000008853 | CCCUGAG |
| ENSG0000008952 | AACAGUC |
| ENSG0000008952 | AAGGCGC |
| ENSG0000008952 | AAGUCUU |
| ENSG0000008952 | ACAGUAC |
| ENSG0000008952 | ACAGUAU |
| ENSG0000008952 | ACAUAGA |
| ENSG0000008952 | AUAAUAC |
| ENSG0000008952 | CAGUCCA |
| ENSG0000008952 | CUGCUCA |
| ENSG0000008952 | CUUACAG |
| ENSG0000008952 | GCCUGGA |
| ENSG0000008952 | GCUGGAU |
| ENSG0000008952 | GGAAUGU |
| ENSG0000008952 | GGAUUUC |
| ENSG0000008952 | GGAUUUU |
| ENSG0000008952 | UAAGACU |
| ENSG0000008952 | UACAAAG |
| ENSG0000008952 | UCCAGUU |
| ENSG0000008952 | UGAAGCU |
| ENSG0000008952 | UGAGAAG |
| ENSG0000008952 | UGAGAAU |
| ENSG0000008952 | UCCUAG  |
| ENSG0000008952 | UUGGCAC |
| ENSG0000008952 | UUUCAAC |
| ENSG0000009307 | AGCAGCA |
| ENSG0000009307 | CUUCACC |



|                |         |
|----------------|---------|
| ENSG0000009307 | GCAGAAG |
| ENSG0000009307 | UGUGCUU |
| ENSG0000009307 | UUGAUCA |
| ENSG0000009335 | AAAGUGC |
| ENSG0000009335 | ACAUUCA |
| ENSG0000009335 | AGUGCCU |
| ENSG0000009335 | AUAAAGU |
| ENSG0000009335 | CUACAAA |
| ENSG0000009335 | UAUUGCU |
| ENSG0000009335 | UUGGCAA |
| ENSG0000009413 | AAAAGUA |
| ENSG0000009413 | AAAGUAC |
| ENSG0000009413 | AACAAAC |
| ENSG0000009413 | AAUGCCC |
| ENSG0000009413 | AGCAAAA |
| ENSG0000009413 | CACAAUG |
| ENSG0000009413 | GCACCAU |
| ENSG0000009413 | GUAACAG |
| ENSG0000009413 | UACAAAG |
| ENSG0000009413 | UGUCUUU |
| ENSG0000009413 | UCCCAUA |
| ENSG0000009694 | AAGGCAC |
| ENSG0000009694 | AUUGCAC |
| ENSG0000009694 | CUUGUGU |
| ENSG0000009694 | GAGGUAU |
| ENSG0000009694 | GAUAUGU |
| ENSG0000009694 | GCCUGAU |
| ENSG0000009694 | GGCAUUG |
| ENSG0000009694 | GGCUCAG |
| ENSG0000009694 | GGUAGAC |
| ENSG0000009694 | UAUAAUA |
| ENSG0000009694 | UCAACAG |
| ENSG0000009694 | UCAUUUG |
| ENSG0000009694 | UCCUGAG |
| ENSG0000009694 | UGCAAAG |
| ENSG0000009694 | UGGAUAA |
| ENSG0000009694 | UUCUGCA |
| ENSG0000009765 | AAGUUGU |
| ENSG0000009765 | CACUCCU |
| ENSG0000009765 | GGCUCUG |
| ENSG0000009780 | AACCUGG |
| ENSG0000009780 | ACCUGGA |
| ENSG0000009780 | CUAUACA |
| ENSG0000009780 | UACAAAG |
| ENSG0000009830 | CCUGCUG |
| ENSG0000009830 | CUGGGGG |
| ENSG0000009830 | GACCCUG |
| ENSG0000009830 | GCUUCCU |
| ENSG0000009830 | GGAGUGU |
| ENSG0000009830 | GGGGGAA |
| ENSG0000009830 | UCCUUU  |
| ENSG0000009830 | UGGGGGA |
| ENSG0000009830 | UCCUCG  |
| ENSG0000009844 | AAAAGUA |
| ENSG0000009844 | AACUGGU |
| ENSG0000009844 | AGCACCA |
| ENSG0000009844 | GAAAACA |
| ENSG0000009844 | GCAGGUU |
| ENSG0000009844 | GGACUGC |
| ENSG0000009844 | UGGACUG |
| ENSG0000009950 | CUGCUCU |
| ENSG0000009954 | AAACUGU |
| ENSG0000009954 | ACCCUGU |
| ENSG0000009954 | ACUGUAG |

|                |          |
|----------------|----------|
| ENSG0000009954 | AUACAAG  |
| ENSG0000009954 | CCCUGUU  |
| ENSG0000009954 | CUACAAA  |
| ENSG0000009954 | GCAACUU  |
| ENSG0000009954 | GCAGGAC  |
| ENSG0000009954 | GGUGGGC  |
| ENSG0000009954 | UACAAAG  |
| ENSG0000009954 | UAUUACC  |
| ENSG0000009954 | UGAAAUG  |
| ENSG0000010017 | AAACUGU  |
| ENSG0000010017 | AACAAAC  |
| ENSG0000010017 | AACUACU  |
| ENSG0000010017 | AAGACAU  |
| ENSG0000010017 | ACAGUAU  |
| ENSG0000010017 | ACAUCAC  |
| ENSG0000010017 | ACUCAGC  |
| ENSG0000010017 | ACUGUUU  |
| ENSG0000010017 | AUAU AAC |
| ENSG0000010017 | AUGUAAU  |
| ENSG0000010017 | AUUGCAC  |
| ENSG0000010017 | GAGUCUU  |
| ENSG0000010017 | GAUUGUA  |
| ENSG0000010017 | GUCUACU  |
| ENSG0000010017 | UAAGACG  |
| ENSG0000010017 | UAAGACU  |
| ENSG0000010017 | UACAAAG  |
| ENSG0000010017 | UACAGUU  |
| ENSG0000010017 | UAUUGCU  |
| ENSG0000010017 | UCAAGUA  |
| ENSG0000010017 | UCAUUUG  |
| ENSG0000010017 | UCCUGAG  |
| ENSG0000010017 | UGAGUCU  |
| ENSG0000010072 | GCAACUU  |
| ENSG0000010244 | AAUCUCA  |
| ENSG0000010244 | AAUCUCU  |
| ENSG0000010244 | AUGUAAU  |
| ENSG0000010244 | CAGCUGG  |
| ENSG0000010244 | CAGGAAC  |
| ENSG0000010244 | CAGUUAC  |
| ENSG0000010244 | GAGAAAU  |
| ENSG0000010244 | GUAUGUU  |
| ENSG0000010244 | UAUUACC  |
| ENSG0000010244 | UCACAAG  |
| ENSG0000010244 | UCUCCAA  |
| ENSG0000010270 | AAAGAGC  |
| ENSG0000010270 | AGGCAGG  |
| ENSG0000010270 | AUAUU AU |
| ENSG0000010270 | GAGGUAG  |
| ENSG0000010270 | UACAAAG  |
| ENSG0000010270 | UCACACA  |
| ENSG0000010278 | CCUGCUG  |
| ENSG0000010278 | CUCAGGG  |
| ENSG0000010278 | CUGCUC A |
| ENSG0000010278 | GGAUUUC  |
| ENSG0000010278 | UGUCUUU  |
| ENSG0000010318 | GGAGAGA  |
| ENSG0000010319 | ACAGUAC  |
| ENSG0000010319 | CUCUGGG  |
| ENSG0000010319 | CUGGGCA  |
| ENSG0000010319 | GAGAACC  |
| ENSG0000010319 | GAGAACU  |
| ENSG0000010319 | GCCUGGA  |
| ENSG0000010319 | GUCACUC  |
| ENSG0000010319 | UCAUUUG  |

|                 |          |
|-----------------|----------|
| ENSG00000010322 | AGCAGCG  |
| ENSG00000010322 | AGCAGCU  |
| ENSG00000010361 | GAGACGC  |
| ENSG00000010404 | AGGGAGG  |
| ENSG00000010404 | CUGACUC  |
| ENSG00000010404 | CUGCUC   |
| ENSG00000010404 | GGAAGAC  |
| ENSG00000010539 | ACAUUCA  |
| ENSG00000010539 | AGGUAGU  |
| ENSG00000010539 | GAGCUAA  |
| ENSG00000010539 | GUAAACA  |
| ENSG00000010539 | GUGAGGU  |
| ENSG00000010610 | ACAUUCA  |
| ENSG00000010671 | AGCUUUAU |
| ENSG00000010704 | CAGGAAC  |
| ENSG00000010803 | AAAGGUA  |
| ENSG00000010803 | CCUUCAU  |
| ENSG00000010803 | CUCCAGC  |
| ENSG00000010803 | GGGGUGC  |
| ENSG00000010803 | UAUAAAG  |
| ENSG00000010803 | UGAGAAG  |
| ENSG00000010803 | UGCUGAC  |
| ENSG00000010810 | AAAGAGG  |
| ENSG00000010810 | AAUACUG  |
| ENSG00000010810 | AUGCAUU  |
| ENSG00000010810 | UUGGCAC  |
| ENSG00000010818 | AAAAAUC  |
| ENSG00000010818 | AAAGUAC  |
| ENSG00000010818 | AAAGUAU  |
| ENSG00000010818 | AACUACU  |
| ENSG00000010818 | AAGAACC  |
| ENSG00000010818 | AAGUGCU  |
| ENSG00000010818 | ACAUAGA  |
| ENSG00000010818 | AUGAUGA  |
| ENSG00000010818 | CAAAGCA  |
| ENSG00000010818 | CAGCAA   |
| ENSG00000010818 | GAAACAU  |
| ENSG00000010818 | UAUUACC  |
| ENSG00000010818 | UCACAGG  |
| ENSG00000010818 | UCACAGU  |
| ENSG00000010818 | UCACAUU  |
| ENSG00000010818 | UCAUGAU  |
| ENSG00000010818 | UUGGUCC  |
| ENSG00000010818 | UUGUUCG  |
| ENSG00000011007 | UCACAUU  |
| ENSG00000011009 | AAUACUG  |
| ENSG00000011009 | ACAUUCA  |
| ENSG00000011009 | AGCAGCA  |
| ENSG00000011009 | AGCAGCU  |
| ENSG00000011009 | CAGGCUC  |
| ENSG00000011009 | CCCUGAG  |
| ENSG00000011009 | CUGGGCA  |
| ENSG00000011009 | GGCUCAG  |
| ENSG00000011009 | GUGAGGU  |
| ENSG00000011009 | UCCUGAG  |
| ENSG00000011021 | AAAAAUC  |
| ENSG00000011021 | AAGGCAC  |
| ENSG00000011021 | CUGGAAA  |
| ENSG00000011021 | CUUUGGU  |
| ENSG00000011021 | GGCUCAG  |
| ENSG00000011021 | GUGCAAA  |
| ENSG00000011021 | UACAAAG  |
| ENSG00000011021 | UUCAAAU  |
| ENSG00000011028 | CACAGGG  |

|                 |         |
|-----------------|---------|
| ENSG00000011028 | CUCCAGC |
| ENSG00000011028 | GGCUCAG |
| ENSG00000011028 | UCACAUU |
| ENSG00000011028 | UUGGUCC |
| ENSG00000011105 | AAAGUGC |
| ENSG00000011105 | AAGUGCA |
| ENSG00000011105 | AGCACCA |
| ENSG00000011105 | AGCAGCA |
| ENSG00000011105 | AGGGAGG |
| ENSG00000011105 | AUGUCUG |
| ENSG00000011105 | CUUUGGU |
| ENSG00000011105 | GAAGGAA |
| ENSG00000011105 | GAGGUAU |
| ENSG00000011105 | GCAGCAU |
| ENSG00000011105 | GCCUGGG |
| ENSG00000011105 | GGAAUGU |
| ENSG00000011105 | GGUGGGC |
| ENSG00000011105 | GUGCUUG |
| ENSG00000011105 | UCCUGAG |
| ENSG00000011105 | UGUGCUU |
| ENSG00000011105 | UUGGCAC |
| ENSG00000011114 | AAAAGUA |
| ENSG00000011114 | AAAGUAC |
| ENSG00000011114 | AAAGUAU |
| ENSG00000011114 | AACAGUC |
| ENSG00000011114 | AAGGCAC |
| ENSG00000011114 | AAGUGCU |
| ENSG00000011114 | ACUUGGA |
| ENSG00000011114 | AGCACCA |
| ENSG00000011114 | AGCCCUU |
| ENSG00000011114 | AGGACAC |
| ENSG00000011114 | AGUACUG |
| ENSG00000011114 | AUGCAUU |
| ENSG00000011114 | CACAGGG |
| ENSG00000011114 | CUAUACA |
| ENSG00000011114 | CUCACAC |
| ENSG00000011114 | CUUUGGU |
| ENSG00000011114 | GAGUGUG |
| ENSG00000011114 | GAUUGUC |
| ENSG00000011114 | GCCUGAU |
| ENSG00000011114 | GUAAACA |
| ENSG00000011114 | GUAGUGU |
| ENSG00000011114 | UCAAGUA |
| ENSG00000011114 | UCACAAG |
| ENSG00000011114 | UGCAUUA |
| ENSG00000011114 | UGCCAGC |
| ENSG00000011114 | UUAUGCA |
| ENSG00000011114 | UUCUGCA |
| ENSG00000011114 | UUGGUUC |
| ENSG00000011132 | AAGGCAC |
| ENSG00000011132 | CACAGUG |
| ENSG00000011198 | AAGGCAC |
| ENSG00000011201 | AACUCUA |
| ENSG00000011201 | CUACAGU |
| ENSG00000011201 | GUUAAUG |
| ENSG00000011258 | AAUUGCU |
| ENSG00000011258 | ACAUCAC |
| ENSG00000011258 | AUAAUAC |
| ENSG00000011258 | AUGCAUU |
| ENSG00000011258 | GUGACUG |
| ENSG00000011258 | UCCUGAG |
| ENSG00000011258 | UUGACAC |
| ENSG00000011260 | UAAGACG |
| ENSG00000011260 | UAAGACU |

|                 |         |
|-----------------|---------|
| ENSG00000011275 | AAAGAAU |
| ENSG00000011275 | AAGGCAC |
| ENSG00000011275 | AAGUGCU |
| ENSG00000011275 | ACACACC |
| ENSG00000011275 | ACACACU |
| ENSG00000011275 | AGUAGUU |
| ENSG00000011275 | AUACAAG |
| ENSG00000011275 | CAAAGUG |
| ENSG00000011275 | CAGUAGU |
| ENSG00000011275 | CUCCAGC |
| ENSG00000011275 | GUGCAA  |
| ENSG00000011275 | UCCAGUU |
| ENSG00000011304 | AAAACUG |
| ENSG00000011304 | AAACUGU |
| ENSG00000011304 | AAAGUAU |
| ENSG00000011304 | AAAGUGC |
| ENSG00000011304 | AAUACUG |
| ENSG00000011304 | AAUCUCU |
| ENSG00000011304 | AAUUUUA |
| ENSG00000011304 | ACUGGCC |
| ENSG00000011304 | CAGCUGG |
| ENSG00000011304 | CUUUGGU |
| ENSG00000011304 | GGAAUGU |
| ENSG00000011304 | UAAUACA |
| ENSG00000011304 | UAUAAAG |
| ENSG00000011304 | UAUAAUA |
| ENSG00000011304 | UAUUGCU |
| ENSG00000011304 | UCUGGAA |
| ENSG00000011304 | UGCAUAG |
| ENSG00000011304 | UUUGCAA |
| ENSG00000011304 | UUUGCAC |
| ENSG00000011332 | AUGGCUU |
| ENSG00000011332 | UUGAGGC |
| ENSG00000011347 | AAAGAGG |
| ENSG00000011347 | AAAGUGC |
| ENSG00000011347 | AGCACCA |
| ENSG00000011347 | AUAAAGU |
| ENSG00000011347 | AUCCUUU |
| ENSG00000011347 | CAAAGCA |
| ENSG00000011347 | CACCAGC |
| ENSG00000011347 | CCCACCU |
| ENSG00000011347 | CUACAAA |
| ENSG00000011347 | CUGGCUC |
| ENSG00000011347 | GAGGCAG |
| ENSG00000011347 | GAGGUAG |
| ENSG00000011347 | GAGGUAU |
| ENSG00000011347 | GGAGGCA |
| ENSG00000011347 | GGUUUUA |
| ENSG00000011347 | UAGAGGA |
| ENSG00000011347 | UAUGGUU |
| ENSG00000011347 | UCACAAG |
| ENSG00000011347 | UCAUUUG |
| ENSG00000011347 | UCCACC  |
| ENSG00000011347 | UCUGGAG |
| ENSG00000011347 | UUUGCAC |
| ENSG00000011347 | UUUUUGC |
| ENSG00000011376 | CUGGGGG |
| ENSG00000011405 | AAAGAGG |
| ENSG00000011405 | AGCAGCU |
| ENSG00000011405 | CUCAAAC |
| ENSG00000011405 | CUUUGGU |
| ENSG00000011405 | GCACCAU |
| ENSG00000011405 | GGAAUGU |
| ENSG00000011405 | GUCAGUU |

|                 |         |
|-----------------|---------|
| ENSG00000011405 | GUGCAAA |
| ENSG00000011405 | GUUAGGA |
| ENSG00000011405 | UCAAGUA |
| ENSG00000011405 | UUCAAGC |
| ENSG00000011405 | UUGGCAC |
| ENSG00000011405 | UUGGUCC |
| ENSG00000011426 | ACUGCAG |
| ENSG00000011426 | AGCAGCA |
| ENSG00000011426 | AGCAGCG |
| ENSG00000011451 | AACGGAA |
| ENSG00000011451 | ACAUAGA |
| ENSG00000011451 | AGUGUGC |
| ENSG00000011451 | CCCUGAG |
| ENSG00000011451 | CUAUACA |
| ENSG00000011451 | CUCUUCC |
| ENSG00000011451 | CUGGAAA |
| ENSG00000011451 | GAGAAAU |
| ENSG00000011451 | GGAAUGU |
| ENSG00000011451 | GGCAGGG |
| ENSG00000011451 | GGCAUUG |
| ENSG00000011451 | GGCUCAG |
| ENSG00000011451 | GGGAGCU |
| ENSG00000011451 | GGUCUAG |
| ENSG00000011451 | GUAGUGU |
| ENSG00000011451 | UCCAGAG |
| ENSG00000011451 | UCCCACC |
| ENSG00000011451 | UCUGGAA |
| ENSG00000011451 | UGCAAAG |
| ENSG00000011454 | AAGGUGC |
| ENSG00000011454 | AAUUUUA |
| ENSG00000011454 | ACAUUCA |
| ENSG00000011454 | AGUGCCU |
| ENSG00000011454 | AGUGCUU |
| ENSG00000011454 | AUAAAGU |
| ENSG00000011454 | AUACAAG |
| ENSG00000011454 | CACAAUG |
| ENSG00000011454 | CACACCU |
| ENSG00000011454 | CAGUAGA |
| ENSG00000011454 | CCAGUGC |
| ENSG00000011454 | CUUACAG |
| ENSG00000011454 | GGCAGCG |
| ENSG00000011454 | GGUUUAC |
| ENSG00000011454 | UCACACA |
| ENSG00000011454 | UGCAUAU |
| ENSG00000011454 | UUGGCAA |
| ENSG00000011454 | UUGGCAC |
| ENSG00000011465 | CCAGUAC |
| ENSG00000011465 | UAAUACA |
| ENSG00000011478 | CUCUUCC |
| ENSG00000011485 | AAAGUAA |
| ENSG00000011485 | AAUGCCC |
| ENSG00000011485 | GGGUUCC |
| ENSG00000011485 | UAUUGCU |
| ENSG00000011485 | UGCCUG  |
| ENSG00000011523 | AAAGCUG |
| ENSG00000011523 | AAGGCAC |
| ENSG00000011523 | ACAUUAC |
| ENSG00000011523 | AGCAGCA |
| ENSG00000011523 | AUUCAUU |
| ENSG00000011523 | CACAAUG |
| ENSG00000011523 | GGCUCUG |
| ENSG00000011523 | GGGUUUA |
| ENSG00000011523 | GUGCUUG |
| ENSG00000011523 | UCAAGUA |

|                 |         |
|-----------------|---------|
| ENSG00000011523 | UCACAAG |
| ENSG00000011523 | UCCCUUG |
| ENSG00000011523 | UCCUGAG |
| ENSG00000011566 | AGGUAGU |
| ENSG00000011566 | CCAGUGU |
| ENSG00000011566 | CUUGUGU |
| ENSG00000011566 | GAGGUAU |
| ENSG00000011638 | AAGUGCA |
| ENSG00000011638 | UCAACAG |
| ENSG00000012048 | AACAGUC |
| ENSG00000012048 | AAUUAUU |
| ENSG00000012048 | AUUCAUU |
| ENSG00000012048 | CCUUCAU |
| ENSG00000012048 | CUGGGGG |
| ENSG00000012048 | GGAAGAC |
| ENSG00000012048 | GGGAUCG |
| ENSG00000012048 | UACAAAG |
| ENSG00000012048 | UGGAUAA |
| ENSG00000012048 | UGGGAUC |
| ENSG00000012048 | UGUGCUU |
| ENSG00000012171 | ACAUUCA |
| ENSG00000012171 | GCUACAU |
| ENSG00000012171 | GUUAAUG |
| ENSG00000012171 | UAUUGCU |
| ENSG00000012171 | UCACAGG |
| ENSG00000012171 | UCACAGU |
| ENSG00000012232 | AAAAAUC |
| ENSG00000012232 | AAGGCAC |
| ENSG00000012232 | AGCAGCA |
| ENSG00000012232 | AGCAGCG |
| ENSG00000012232 | AGCAGCU |
| ENSG00000012232 | AUAUAAC |
| ENSG00000012232 | CAGUGCA |
| ENSG00000012232 | CCAGUGU |
| ENSG00000012232 | CUGCUCU |
| ENSG00000012232 | GCCUGU  |
| ENSG00000012232 | GGAAGAC |
| ENSG00000012232 | GUGUGGC |
| ENSG00000012232 | UAAUAGU |
| ENSG00000012232 | UACAAAG |
| ENSG00000012232 | UGCCUG  |
| ENSG00000012232 | UGUGCUU |
| ENSG00000012660 | GGCCUG  |
| ENSG00000012660 | GGGCCCC |
| ENSG00000012822 | AAGGCAC |
| ENSG00000012822 | AUCAUAC |
| ENSG00000012822 | GGGCGAG |
| ENSG00000012822 | UAUUGCU |
| ENSG00000012963 | AAGGCAC |
| ENSG00000012963 | AGCCCUU |
| ENSG00000012963 | AGGCAGG |
| ENSG00000012963 | AUCCCUU |
| ENSG00000012963 | AUGCAUU |
| ENSG00000012963 | CACAGGG |
| ENSG00000012963 | CAGCAGA |
| ENSG00000012963 | CCCUGAG |
| ENSG00000012963 | GCUUCCU |
| ENSG00000012963 | GGAAGCC |
| ENSG00000012963 | UCACAGG |
| ENSG00000012983 | CACAGUG |
| ENSG00000013016 | AAGGCAC |
| ENSG00000013016 | ACUUGGA |
| ENSG00000013016 | CACAGUG |
| ENSG00000013016 | CCUGCUG |

|                 |          |
|-----------------|----------|
| ENSG00000013016 | CUUGGAG  |
| ENSG00000013016 | UCACAGU  |
| ENSG00000013016 | UGCCAGC  |
| ENSG00000013293 | UGAAAUG  |
| ENSG00000013297 | AAGGCAC  |
| ENSG00000013297 | ACCCGUA  |
| ENSG00000013297 | CAGGAAC  |
| ENSG00000013297 | CAGUCUG  |
| ENSG00000013297 | GGAGAGA  |
| ENSG00000013297 | UAUAAAG  |
| ENSG00000013297 | UCAUUUG  |
| ENSG00000013306 | AAGGCAC  |
| ENSG00000013306 | UUGGUCC  |
| ENSG00000013503 | UUCUAAU  |
| ENSG00000013523 | CCCCUGG  |
| ENSG00000013523 | CUUUGGU  |
| ENSG00000013523 | GAGCUAA  |
| ENSG00000013523 | GCUGGAU  |
| ENSG00000013523 | GGCUCAG  |
| ENSG00000013523 | GUCUCUG  |
| ENSG00000013523 | UCUGGAA  |
| ENSG00000013523 | UGAUCCA  |
| ENSG00000013573 | AAUUGCU  |
| ENSG00000013588 | CCAGUGU  |
| ENSG00000013588 | CUCCAC   |
| ENSG00000013588 | CUUACAG  |
| ENSG00000013588 | UAUUGCU  |
| ENSG00000013619 | UCACAGG  |
| ENSG00000013619 | UGCAUUAU |
| ENSG00000014164 | GAGGUAG  |
| ENSG00000014164 | GAGGUUAU |
| ENSG00000014164 | UGCUGAC  |
| ENSG00000014216 | AAGGCAC  |
| ENSG00000014216 | AGGCAGG  |
| ENSG00000014216 | CUGCAGG  |
| ENSG00000014216 | GAGGCAG  |
| ENSG00000014216 | UGCAGCU  |
| ENSG00000014824 | UAUAAAG  |
| ENSG00000015133 | CACAGUG  |
| ENSG00000015133 | CCAGUGC  |
| ENSG00000015133 | CCAGUGU  |
| ENSG00000015133 | UAUUACC  |
| ENSG00000015133 | UCCAGAG  |
| ENSG00000015133 | UUGGCAC  |
| ENSG00000015153 | AAAGAAU  |
| ENSG00000015153 | AAAGUAC  |
| ENSG00000015153 | ACAAUAU  |
| ENSG00000015153 | ACAGUAC  |
| ENSG00000015153 | ACCAGCA  |
| ENSG00000015153 | ACUGUGU  |
| ENSG00000015153 | AGUAGAC  |
| ENSG00000015153 | AUAAAGU  |
| ENSG00000015153 | CACAAUG  |
| ENSG00000015153 | CAGCAGG  |
| ENSG00000015153 | CCAGUGU  |
| ENSG00000015153 | CUACAGU  |
| ENSG00000015153 | CUAGUAA  |
| ENSG00000015153 | CUCAAAC  |
| ENSG00000015153 | CUUACAG  |
| ENSG00000015153 | CUUGUAU  |
| ENSG00000015153 | GAGGAUA  |
| ENSG00000015153 | GAGGUAG  |
| ENSG00000015153 | GCAGCAU  |
| ENSG00000015153 | GUGCAAA  |



|                 |         |
|-----------------|---------|
| ENSG00000015153 | UACAAAG |
| ENSG00000015153 | UCACAAG |
| ENSG00000015153 | UCCUAUA |
| ENSG00000015153 | UCUCAAG |
| ENSG00000015153 | UCUGGAA |
| ENSG00000015153 | UGUGUGG |
| ENSG00000015153 | UUCCUAG |
| ENSG00000015153 | UUGGCAA |
| ENSG00000015171 | AAAAACC |
| ENSG00000015171 | AACGGCU |
| ENSG00000015171 | AAUGCCC |
| ENSG00000015171 | AAUUAUU |
| ENSG00000015171 | ACCCUGU |
| ENSG00000015171 | ACUUGGA |
| ENSG00000015171 | AGCAGCU |
| ENSG00000015171 | AGUAACA |
| ENSG00000015171 | AUACAAG |
| ENSG00000015171 | AUGCAUU |
| ENSG00000015171 | CACAAUG |
| ENSG00000015171 | CCCUGUU |
| ENSG00000015171 | CCUGCUG |
| ENSG00000015171 | GCUGGUG |
| ENSG00000015171 | GGAAUGU |
| ENSG00000015171 | GUGUCAC |
| ENSG00000015171 | GUUAGGA |
| ENSG00000015171 | UAUAAAG |
| ENSG00000015171 | UAUUGCU |
| ENSG00000015171 | UCUGGAA |
| ENSG00000015171 | UGCAGCU |
| ENSG00000015171 | UGCAUAG |
| ENSG00000015475 | AAGGCAC |
| ENSG00000015479 | GGCUCAG |
| ENSG00000015532 | CCCCUGG |
| ENSG00000015532 | CUGUUGA |
| ENSG00000015532 | UGCAUAG |
| ENSG00000015592 | AGGAUGU |
| ENSG00000015592 | AGUGCUG |
| ENSG00000015592 | AUGGCUU |
| ENSG00000015592 | CCAGUGC |
| ENSG00000015592 | CUCCCAC |
| ENSG00000015592 | CUGGAAA |
| ENSG00000015592 | UCCCACC |
| ENSG00000015592 | UGGCCAC |
| ENSG00000015676 | AUUGCAC |
| ENSG00000015676 | CAGCUGG |
| ENSG00000015676 | GAAAACA |
| ENSG00000015676 | UAUUGCU |
| ENSG00000015676 | UGCAAAG |
| ENSG00000016082 | AAGUCUU |
| ENSG00000016082 | AGCACCA |
| ENSG00000016082 | CUAUACA |
| ENSG00000016082 | CUUCACC |
| ENSG00000016082 | CUUUGGU |
| ENSG00000016082 | GAGACGC |
| ENSG00000016082 | GAUUGUA |
| ENSG00000016082 | GCACCAU |
| ENSG00000016082 | GGCAAGA |
| ENSG00000016082 | UCACAGG |
| ENSG00000016082 | UGUCUUU |
| ENSG00000016082 | UUGGCAA |
| ENSG00000016082 | UUGGCAC |
| ENSG00000016402 | UGUCUGC |
| ENSG00000016864 | GAGAAAU |
| ENSG00000017260 | AAGUGCU |

|                 |         |
|-----------------|---------|
| ENSG00000017260 | ACAGUAC |
| ENSG00000017260 | ACAGUAU |
| ENSG00000017260 | AGUGAUC |
| ENSG00000017260 | AUGCCUU |
| ENSG00000017260 | CAAAGUG |
| ENSG00000017260 | CACCACC |
| ENSG00000017260 | CAGCAGG |
| ENSG00000017260 | GCCCUUA |
| ENSG00000017260 | GGUGGUU |
| ENSG00000017260 | UGCAUAG |
| ENSG00000017260 | UGCAUUA |
| ENSG00000017260 | UGCCAGC |
| ENSG00000017260 | UGCCCUG |
| ENSG00000017260 | UUCAAAU |
| ENSG00000017260 | UUCCUAG |
| ENSG00000017260 | UUUCAAC |
| ENSG00000017260 | UUUGCAA |
| ENSG00000017427 | AAAGCUG |
| ENSG00000017427 | AAAUUUC |
| ENSG00000017427 | AAGGUGC |
| ENSG00000017427 | ACUCCAG |
| ENSG00000017427 | ACUGGAU |
| ENSG00000017427 | AGCAGCA |
| ENSG00000017427 | AGCAGCG |
| ENSG00000017427 | AGCAGCU |
| ENSG00000017427 | AGGCAGG |
| ENSG00000017427 | AGGUAGU |
| ENSG00000017427 | AUAUAAC |
| ENSG00000017427 | AUGCAUU |
| ENSG00000017427 | CACAGUG |
| ENSG00000017427 | CAGACAG |
| ENSG00000017427 | CAGUAGA |
| ENSG00000017427 | CAGUAGU |
| ENSG00000017427 | CCAGCAU |
| ENSG00000017427 | CUACAAA |
| ENSG00000017427 | CUCCAGC |
| ENSG00000017427 | CUUCACC |
| ENSG00000017427 | CUUUGGU |
| ENSG00000017427 | GAGGUAG |
| ENSG00000017427 | GAGGUAU |
| ENSG00000017427 | GCACCAU |
| ENSG00000017427 | GCUACAU |
| ENSG00000017427 | GGGUUUA |
| ENSG00000017427 | GUAACA  |
| ENSG00000017427 | UCAAGUA |
| ENSG00000017427 | UCACACA |
| ENSG00000017427 | UCACAGG |
| ENSG00000017427 | UCACAGU |
| ENSG00000017427 | UCUCAAG |
| ENSG00000017427 | UGAAGUG |
| ENSG00000017427 | UGACCUA |
| ENSG00000017427 | UGGCCAC |
| ENSG00000017427 | UUCUAAU |
| ENSG00000017621 | ACCACAG |
| ENSG00000017621 | AGGAUGU |
| ENSG00000017621 | CACACCG |
| ENSG00000017621 | CACACCU |
| ENSG00000017621 | CUCACAC |
| ENSG00000017621 | CUGACUC |
| ENSG00000017621 | GUGACUG |
| ENSG00000017797 | AAGGCAC |
| ENSG00000017797 | ACAGGUG |
| ENSG00000017797 | ACAGUAC |
| ENSG00000017797 | ACAGUAU |

|                 |         |
|-----------------|---------|
| ENSG00000017797 | ACAUUCA |
| ENSG00000017797 | AGGUAGU |
| ENSG00000017797 | AGUGCAA |
| ENSG00000017797 | CAGUGCA |
| ENSG00000017797 | CUCCAGC |
| ENSG00000017797 | CUGUUGA |
| ENSG00000017797 | CUUCUCU |
| ENSG00000017797 | GAGGCAG |
| ENSG00000017797 | GGUUUAC |
| ENSG00000017797 | UAGAGGA |
| ENSG00000017797 | UAUUGCU |
| ENSG00000017797 | UCUGGAA |
| ENSG00000017797 | UGUUGAA |
| ENSG00000017797 | UUGAUCA |
| ENSG00000017797 | UUGGUUC |
| ENSG00000018189 | AAGUCAC |
| ENSG00000018189 | AUCCUUG |
| ENSG00000018189 | CUACAGU |
| ENSG00000018189 | GAAGGAA |
| ENSG00000018189 | GAGGUAG |
| ENSG00000018189 | UACAGUU |
| ENSG00000018236 | AAGGCAC |
| ENSG00000018280 | AAAGAGG |
| ENSG00000018280 | CUGCCCC |
| ENSG00000018280 | CUGGAAA |
| ENSG00000018280 | GACCUGG |
| ENSG00000018280 | GCCCUUA |
| ENSG00000018280 | GGAGGAG |
| ENSG00000018280 | GGGGAGC |
| ENSG00000018280 | UGCCUG  |
| ENSG00000018510 | AACCUGU |
| ENSG00000018510 | CAGCUGG |
| ENSG00000018625 | CUCAAAC |
| ENSG00000018625 | CUUACAG |
| ENSG00000018625 | GGCAGUG |
| ENSG00000019144 | AAGGCAC |
| ENSG00000019144 | AAGGCGC |
| ENSG00000019144 | AAUACUG |
| ENSG00000019144 | CCAGGAG |
| ENSG00000019144 | CCUUCUG |
| ENSG00000019144 | CUGCUCU |
| ENSG00000019144 | CUUUGGU |
| ENSG00000019144 | GGAGAGA |
| ENSG00000019144 | GGCUCUG |
| ENSG00000019144 | UACAAAG |
| ENSG00000019144 | UGGUACC |
| ENSG00000019144 | UUGGCAA |
| ENSG00000019144 | UUGGCAC |
| ENSG00000019186 | UCCCUGU |
| ENSG00000019505 | AGGGAGG |
| ENSG00000019505 | CUCAGGG |
| ENSG00000019505 | GGAGGCA |
| ENSG00000019505 | GUGCUUG |
| ENSG00000019505 | UCACAAG |
| ENSG00000019505 | UCUGGAA |
| ENSG00000019505 | UGAUCCA |
| ENSG00000019549 | GGAAUGU |
| ENSG00000019991 | ACUGGCU |
| ENSG00000019991 | UACAAAG |
| ENSG00000019995 | AAAGUGC |
| ENSG00000019995 | ACUGUAG |
| ENSG00000019995 | AGGACAC |
| ENSG00000019995 | AGUGCUU |
| ENSG00000019995 | AUGCAUU |

|                 |         |
|-----------------|---------|
| ENSG0000001995  | CUUACAG |
| ENSG0000001995  | GCUGGUG |
| ENSG0000001995  | GUGCUUG |
| ENSG0000001995  | UACAAAG |
| ENSG0000001995  | UAUCAGA |
| ENSG0000001995  | UCACAGG |
| ENSG0000001995  | UCACAGU |
| ENSG0000001995  | UCCCACA |
| ENSG0000001995  | UCCUAUA |
| ENSG0000001995  | UCCUGAG |
| ENSG0000001995  | UGAAGUG |
| ENSG0000001995  | UGGAUAA |
| ENSG0000001995  | UGUGCUU |
| ENSG0000001995  | UUCCUAG |
| ENSG0000001995  | UUGUUCG |
| ENSG00000020129 | AAAGCUG |
| ENSG00000020129 | ACGCACU |
| ENSG00000020129 | CCUGCUG |
| ENSG00000020129 | CGGCCUG |
| ENSG00000020129 | CUGGCUC |
| ENSG00000020129 | GAAACAU |
| ENSG00000020129 | GCUGGAU |
| ENSG00000020129 | GGACCUG |
| ENSG00000020129 | GGCAGGG |
| ENSG00000020129 | GGCAGUG |
| ENSG00000020129 | GGCGGGG |
| ENSG00000020129 | GGGUGUU |
| ENSG00000020129 | UGCCAGC |
| ENSG00000020129 | UGGGGGA |
| ENSG00000020181 | AAGGCAC |
| ENSG00000020181 | AGCAGCA |
| ENSG00000020181 | AUAAUAC |
| ENSG00000020181 | AUAUUAU |
| ENSG00000020181 | AUGUGGG |
| ENSG00000020181 | AUUGCAC |
| ENSG00000020181 | CAUAUUG |
| ENSG00000020181 | CCAGUGU |
| ENSG00000020181 | CUCCAGC |
| ENSG00000020181 | CUUUGGU |
| ENSG00000020181 | GCAGCAU |
| ENSG00000020181 | GGAAGAC |
| ENSG00000020181 | GUAAACA |
| ENSG00000020181 | UAAUACA |
| ENSG00000020181 | UAAUAUC |
| ENSG00000020181 | UACAAAG |
| ENSG00000020181 | UCAUUCG |
| ENSG00000020181 | UCCCUCU |
| ENSG00000020181 | UGCAAAG |
| ENSG00000020181 | UGCAUAG |
| ENSG00000020181 | UGCAUUA |
| ENSG00000020181 | UUGGCAA |
| ENSG00000020181 | UUUGCAA |
| ENSG00000020256 | AACAAAC |
| ENSG00000020633 | AAGUGCA |
| ENSG00000020633 | AAGUGCU |
| ENSG00000020633 | AAGUUGU |
| ENSG00000020633 | ACAAUAU |
| ENSG00000020633 | ACUGUAG |
| ENSG00000020633 | AGUGCUG |
| ENSG00000020633 | CAAAGCA |
| ENSG00000020633 | CAAAGUG |
| ENSG00000020633 | CAGGAAC |
| ENSG00000020633 | CCAGUGC |
| ENSG00000020633 | CCAGUGU |

|                 |         |
|-----------------|---------|
| ENSG00000020633 | CUACAAA |
| ENSG00000020633 | CUGGGGG |
| ENSG00000020633 | GUGCAAA |
| ENSG00000020633 | UACAAAG |
| ENSG00000020633 | UGCAAAG |
| ENSG00000020922 | GAGAAAU |
| ENSG00000020922 | UGCAUAG |
| ENSG00000021574 | AAAAAUC |
| ENSG00000021574 | AAUACUG |
| ENSG00000021574 | AGCACCA |
| ENSG00000021574 | AUACAAG |
| ENSG00000021574 | UAUUACC |
| ENSG00000021574 | UGUGCUU |
| ENSG00000021574 | UUGGCAA |
| ENSG00000021645 | AAGUGUG |
| ENSG00000021645 | AUGCAUU |
| ENSG00000021645 | GAUAUGU |
| ENSG00000021645 | UGUGUCA |
| ENSG00000021762 | AAGUGCU |
| ENSG00000021762 | AGCAUUC |
| ENSG00000021762 | GGAAGAC |
| ENSG00000021762 | GGCUCUG |
| ENSG00000021762 | GUGCCUG |
| ENSG00000021826 | CACAAUG |
| ENSG00000021826 | GCACCAU |
| ENSG00000021826 | UCACAAG |
| ENSG00000021852 | AUGGCAC |
| ENSG00000022267 | ACUGCAG |
| ENSG00000022267 | CAGGCUC |
| ENSG00000022267 | GAGCCC  |
| ENSG00000022267 | GGCGCCU |
| ENSG00000022355 | AAUCUCA |
| ENSG00000022355 | AGCCCUU |
| ENSG00000022355 | GCCCUUA |
| ENSG00000022355 | UAAGACG |
| ENSG00000022355 | UAAGACU |
| ENSG00000022567 | AAAGUGC |
| ENSG00000022567 | AAGUGCA |
| ENSG00000022567 | GAGGUAG |
| ENSG00000022840 | AAAAAUC |
| ENSG00000022840 | ACUCAAA |
| ENSG00000022840 | AUUGCAC |
| ENSG00000022840 | CAGUAGU |
| ENSG00000022840 | CUGGAAA |
| ENSG00000022840 | GAGCUAA |
| ENSG00000022840 | GCAACUU |
| ENSG00000022840 | UAUUGCU |
| ENSG00000022840 | UUCUUGU |
| ENSG00000022840 | UUGGUUC |
| ENSG00000022976 | UAUAAAG |
| ENSG00000023041 | AUGGCAC |
| ENSG00000023041 | AUGGCUU |
| ENSG0000002328  | AAAACUG |
| ENSG00000023287 | AAAGUGC |
| ENSG00000023287 | AACAUUC |
| ENSG00000023287 | AAGGCAC |
| ENSG00000023287 | AAGUGCU |
| ENSG00000023287 | ACAGGUG |
| ENSG00000023287 | AGUGCUU |
| ENSG00000023287 | AUAAAGU |
| ENSG00000023287 | CAAUUGC |
| ENSG00000023287 | CACUCCU |
| ENSG00000023287 | GCUGGUG |
| ENSG00000023287 | GUUAAUG |

|                 |         |
|-----------------|---------|
| ENSG00000023287 | UCACAAG |
| ENSG00000023287 | UUCAAAU |
| ENSG00000023516 | AAAGGUA |
| ENSG00000023516 | ACAUUAC |
| ENSG00000023516 | AGCAGCG |
| ENSG00000023516 | AGCAGCU |
| ENSG00000023516 | CCAGUGC |
| ENSG00000023516 | GCUGGUG |
| ENSG00000023516 | GGAAUGU |
| ENSG00000023572 | GUUCAUG |
| ENSG00000023892 | UCUCAAG |
| ENSG00000023902 | GAGGUAG |
| ENSG00000023902 | GAGGUAU |
| ENSG00000023902 | UUUUUGC |
| ENSG00000023909 | ACCCUGU |
| ENSG00000023909 | AUUGCAC |
| ENSG00000023909 | CUUUGGU |
| ENSG00000023909 | GGCAAGA |
| ENSG00000023909 | UCCAGAG |
| ENSG00000023909 | UUCUUGU |
| ENSG00000024422 | AGCACCA |
| ENSG00000024422 | GAGCCCC |
| ENSG00000024422 | GGCAGGG |
| ENSG00000024422 | GGGGAGC |
| ENSG00000024526 | GAGAAAU |
| ENSG00000025039 | AAAGUGC |
| ENSG00000025039 | AAGUGCU |
| ENSG00000025293 | AAAGGUA |
| ENSG00000025293 | AAUGUUG |
| ENSG00000025293 | ACAUUAC |
| ENSG00000025293 | ACCUGGA |
| ENSG00000025293 | AGCAGCA |
| ENSG00000025293 | CACAGUG |
| ENSG00000025293 | CAGUGCA |
| ENSG00000025293 | CCCUGAG |
| ENSG00000025293 | CUCACAC |
| ENSG00000025293 | GGCUCUG |
| ENSG00000025293 | GUGCUUG |
| ENSG00000025293 | GUUAAUG |
| ENSG00000025293 | UAUUGCU |
| ENSG00000025293 | UCAAGUA |
| ENSG00000025293 | UGCAAAG |
| ENSG00000025293 | UGCAGCU |
| ENSG00000025293 | UGUGCUU |
| ENSG00000025293 | UUCAAGC |
| ENSG00000025293 | UUUGCAC |
| ENSG00000025423 | AAAGAAU |
| ENSG00000025434 | GGAAUGU |
| ENSG00000025772 | AAGGCAC |
| ENSG00000025772 | CCCACCU |
| ENSG00000025772 | GAGAACC |
| ENSG00000025796 | GGAAUGU |
| ENSG00000025800 | AAAGAAU |
| ENSG00000025800 | AAAGAGC |
| ENSG00000025800 | AAAGAGG |
| ENSG00000025800 | AAGUCAC |
| ENSG00000025800 | ACAGUAU |
| ENSG00000025800 | ACUCAGC |
| ENSG00000025800 | AGGCAGG |
| ENSG00000025800 | AGGGAGG |
| ENSG00000025800 | AUACAAG |
| ENSG00000025800 | AUAUAAC |
| ENSG00000025800 | AUGACAC |
| ENSG00000025800 | CACAGUG |

|                 |         |
|-----------------|---------|
| ENSG00000025800 | CACCACC |
| ENSG00000025800 | CAGCAGA |
| ENSG00000025800 | CAGCUGG |
| ENSG00000025800 | CAGGAAC |
| ENSG00000025800 | CAGUAGA |
| ENSG00000025800 | CAGUAGU |
| ENSG00000025800 | CAUGGAU |
| ENSG00000025800 | CCCCUGG |
| ENSG00000025800 | CCCUGAG |
| ENSG00000025800 | CUAGUCC |
| ENSG00000025800 | CUCUUCC |
| ENSG00000025800 | CUGGAAA |
| ENSG00000025800 | GAAGGAA |
| ENSG00000025800 | GAGAACC |
| ENSG00000025800 | GAGAACU |
| ENSG00000025800 | GAGGCAG |
| ENSG00000025800 | GCAACUU |
| ENSG00000025800 | GCACCAU |
| ENSG00000025800 | GGAAGAC |
| ENSG00000025800 | GGAGGCA |
| ENSG00000025800 | GGCAGGG |
| ENSG00000025800 | GGCCUG  |
| ENSG00000025800 | GGGAUCG |
| ENSG00000025800 | GGGUCGG |
| ENSG00000025800 | GGUGGUC |
| ENSG00000025800 | GGUGGUU |
| ENSG00000025800 | GUAACA  |
| ENSG00000025800 | GUCUACU |
| ENSG00000025800 | UAAUAUC |
| ENSG00000025800 | UCACAGU |
| ENSG00000025800 | UCACCAC |
| ENSG00000025800 | UCUGGAA |
| ENSG00000025800 | UGACAUC |
| ENSG00000025800 | UGACCUA |
| ENSG00000025800 | UGAUCCA |
| ENSG00000025800 | UGGCCAC |
| ENSG00000025800 | UGGGAUC |
| ENSG00000025800 | UGUGUGG |
| ENSG00000025800 | UUCAAAU |
| ENSG00000025800 | UUCAAGC |
| ENSG00000025800 | UUCUUGU |
| ENSG00000025800 | UUGACAC |
| ENSG00000025800 | UUGGUCC |
| ENSG00000025800 | UUUCAAC |
| ENSG00000026025 | AAAACUG |
| ENSG00000026025 | AAAGCUG |
| ENSG00000026025 | AAGGCAC |
| ENSG00000026025 | CUGGAAA |
| ENSG00000026025 | GCUGGUG |
| ENSG00000026025 | UGAAGCU |
| ENSG00000026508 | CAGUAGA |
| ENSG00000026508 | CAGUAGU |
| ENSG00000026508 | CUUCACC |
| ENSG00000026652 | AGCACCA |
| ENSG00000026652 | GAGACCU |
| ENSG00000026652 | UCCCUUG |
| ENSG00000026652 | UCCCUUU |
| ENSG00000026652 | UUGGAGG |
| ENSG00000027075 | UCACAGG |
| ENSG00000027075 | UCACAGU |
| ENSG00000027847 | GCUUCCU |
| ENSG00000027869 | AACAAAC |
| ENSG00000027869 | AGCAGCA |
| ENSG00000027869 | AGCCAGU |

|                 |         |
|-----------------|---------|
| ENSG00000027869 | CAGACAG |
| ENSG00000027869 | GCAGCAU |
| ENSG00000027869 | GGCUCAG |
| ENSG00000028137 | AGCUGCC |
| ENSG00000028137 | CAGCUGG |
| ENSG00000028137 | CAGUGCA |
| ENSG00000028137 | GAGGUAG |
| ENSG00000028137 | GAGGUAU |
| ENSG00000028137 | GUGCAAA |
| ENSG00000028203 | ACAGUAC |
| ENSG00000028203 | ACAGUAU |
| ENSG00000028203 | AGCCCUU |
| ENSG00000028203 | GCCCUUA |
| ENSG00000028277 | ACAUUCA |
| ENSG00000028277 | AGCACCA |
| ENSG00000028277 | AUCCUUU |
| ENSG00000028277 | CAAAACU |
| ENSG00000028277 | CACUCCU |
| ENSG00000028277 | CAGCUGG |
| ENSG00000028277 | CCCCAG  |
| ENSG00000028277 | CUGGAAA |
| ENSG00000028277 | CUGGCUC |
| ENSG00000028277 | CUGUUGA |
| ENSG00000028277 | CUUUGGU |
| ENSG00000028277 | GAGGUAG |
| ENSG00000028277 | GAGGUAU |
| ENSG00000028277 | GCCUGU  |
| ENSG00000028277 | GGAGGCA |
| ENSG00000028277 | GUCACUC |
| ENSG00000028277 | UCUGGAA |
| ENSG00000028277 | UCUGGAG |
| ENSG00000028277 | UGAAGCU |
| ENSG00000028277 | UGGAGAU |
| ENSG00000028277 | UUCCUCG |
| ENSG00000028277 | UUGUGAC |
| ENSG00000028528 | ACUCCAG |
| ENSG00000028528 | AGCAAAA |
| ENSG00000028528 | AGCCAGU |
| ENSG00000028528 | AGGGAGG |
| ENSG00000028528 | AGUAACA |
| ENSG00000028528 | AUAUUAU |
| ENSG00000028528 | AUGGCAC |
| ENSG00000028528 | CAGGUGA |
| ENSG00000028528 | GACCUGG |
| ENSG00000028528 | GAGGUAG |
| ENSG00000028528 | GCACCAU |
| ENSG00000028528 | GGAAGCC |
| ENSG00000028528 | GGCAAGA |
| ENSG00000028528 | GGCAGCG |
| ENSG00000028528 | GUAACAG |
| ENSG00000028528 | UAUUACC |
| ENSG00000028528 | UGAGAAU |
| ENSG00000028528 | UGUAUAA |
| ENSG00000028528 | UUCAAGC |
| ENSG00000028528 | UUGGUCC |
| ENSG00000028839 | ACAUUCA |
| ENSG00000028839 | AGUGCAA |
| ENSG00000028839 | GUAACA  |
| ENSG00000028839 | UUGGUCC |
| ENSG00000029363 | AAAUGGU |
| ENSG00000029363 | AAUCCUU |
| ENSG00000029363 | ACAAGGU |
| ENSG00000029363 | ACUCAA  |
| ENSG00000029363 | AUCCUUU |



|                 |         |
|-----------------|---------|
| ENSG00000029363 | AUGACAC |
| ENSG00000029363 | CAAAGCA |
| ENSG00000029363 | CACACCU |
| ENSG00000029363 | CCCUGUC |
| ENSG00000029363 | CCUGUU  |
| ENSG00000029363 | CUUUGGU |
| ENSG00000029363 | GAGCUAA |
| ENSG00000029363 | GUAAACA |
| ENSG00000029363 | UACAAAG |
| ENSG00000029363 | UCACAGG |
| ENSG00000029363 | UCACAGU |
| ENSG00000029363 | UCCUGU  |
| ENSG00000029363 | UGCAAAG |
| ENSG00000029363 | UUGGUUC |
| ENSG00000029364 | AAAUGGU |
| ENSG00000029364 | AGCACCA |
| ENSG00000029364 | AGCAGCA |
| ENSG00000029364 | AGUGGUU |
| ENSG00000029364 | CAGCAGA |
| ENSG00000029364 | CUGGACU |
| ENSG00000029364 | GGUUGUC |
| ENSG00000029364 | UCCUGU  |
| ENSG00000029364 | UGAGAAU |
| ENSG00000029364 | UUGGCAC |
| ENSG00000029534 | ACAUCAC |
| ENSG00000029534 | ACAUUCA |
| ENSG00000029534 | ACUGCAG |
| ENSG00000029534 | ACUGUAG |
| ENSG00000029534 | AGCACCA |
| ENSG00000029534 | AGCAUUC |
| ENSG00000029534 | AGGAGCU |
| ENSG00000029534 | AGGCAGG |
| ENSG00000029534 | CACAGUG |
| ENSG00000029534 | CUACAGU |
| ENSG00000029534 | CUCUAGC |
| ENSG00000029534 | CUCUGGG |
| ENSG00000029534 | CUGGCUC |
| ENSG00000029534 | CUUACAG |
| ENSG00000029534 | CUUCUCU |
| ENSG00000029534 | GGAAGCC |
| ENSG00000029534 | GGAUUUU |
| ENSG00000029534 | GUGUGGC |
| ENSG00000029534 | UACAGUU |
| ENSG00000029534 | UCACAGU |
| ENSG00000029534 | UGCAUUA |
| ENSG00000029534 | UGUGCUU |
| ENSG00000029534 | UGUGUGG |
| ENSG00000029639 | ACUGUAG |
| ENSG00000029725 | AAAGGUA |
| ENSG00000029725 | AAGUGCU |
| ENSG00000029725 | AAUACUG |
| ENSG00000029725 | AGCAGCU |
| ENSG00000029725 | AGCAUUC |
| ENSG00000029725 | AGGACAC |
| ENSG00000029725 | AGUGCUU |
| ENSG00000029725 | AUUCAUU |
| ENSG00000029725 | CAGUUAC |
| ENSG00000029725 | CAUAUUG |
| ENSG00000029725 | CUUGUGU |
| ENSG00000029725 | GUGCUUG |
| ENSG00000029725 | UAAUAUC |
| ENSG00000029725 | UACAGUU |
| ENSG00000029725 | UUCUUGU |
| ENSG00000029725 | UUGUGAC |

|                 |         |
|-----------------|---------|
| ENSG00000029993 | AAAGUGC |
| ENSG00000029993 | AAGUGCA |
| ENSG00000029993 | AGCAUUC |
| ENSG00000029993 | AUGCCUU |
| ENSG00000029993 | AUGUAAU |
| ENSG00000029993 | CAAAGUG |
| ENSG00000029993 | CACCACC |
| ENSG00000029993 | CAGCAA  |
| ENSG00000029993 | CAGCAGA |
| ENSG00000029993 | CAGUGCA |
| ENSG00000029993 | CCCUGAG |
| ENSG00000029993 | GAAACAU |
| ENSG00000029993 | GCAUCC  |
| ENSG00000029993 | GGCAGCG |
| ENSG00000029993 | GUAAACA |
| ENSG00000029993 | UAAUGCU |
| ENSG00000029993 | UAUUACC |
| ENSG00000029993 | UCAAGUA |
| ENSG00000029993 | UCACAGU |
| ENSG00000029993 | UCAUUUG |
| ENSG00000029993 | UGCCAGC |
| ENSG00000030066 | AGCACCA |
| ENSG00000030066 | CACCAGC |
| ENSG00000030066 | GUCAGUU |
| ENSG00000030110 | AAAGCUG |
| ENSG00000030110 | AAUGUUG |
| ENSG00000030110 | AGCACCA |
| ENSG00000030110 | CUGCAGC |
| ENSG00000030110 | GCACCAU |
| ENSG00000030419 | AAAGCUG |
| ENSG00000030419 | AAGGCAC |
| ENSG00000030419 | AAUACUG |
| ENSG00000030419 | AUGCAUU |
| ENSG00000030419 | AUUGCAC |
| ENSG00000030419 | CACAGUG |
| ENSG00000030419 | CAGUUAC |
| ENSG00000030419 | CUCACAC |
| ENSG00000030419 | CUUGGAG |
| ENSG00000030419 | CUUUGGU |
| ENSG00000030419 | GAGAAAU |
| ENSG00000030419 | GAGGUAG |
| ENSG00000030419 | UCCAGUU |
| ENSG00000030419 | UCCCUUG |
| ENSG00000030419 | UGAGAAG |
| ENSG00000030419 | UGCAGCU |
| ENSG00000030419 | UGCAUAG |
| ENSG00000030419 | UGCUGAC |
| ENSG00000030419 | UUCUAAU |
| ENSG00000030582 | CACAGGG |
| ENSG00000030582 | UGGCCAC |
| ENSG00000031691 | CAGACAG |
| ENSG00000031691 | UAAUAUC |
| ENSG00000031698 | UAUUACC |
| ENSG00000031823 | AAAAGUA |
| ENSG00000031823 | AAAGUUU |
| ENSG00000031823 | AAGUCUU |
| ENSG00000031823 | ACAUUCA |
| ENSG00000031823 | AGCAGCA |
| ENSG00000031823 | AUGACAC |
| ENSG00000031823 | AUGAUGA |
| ENSG00000031823 | AUGAUGC |
| ENSG00000031823 | AUGUGCC |
| ENSG00000031823 | CAAAGCA |
| ENSG00000031823 | CCAGUGU |

|                |         |
|----------------|---------|
| ENSG0000031823 | CUUACAG |
| ENSG0000031823 | GAAGGAA |
| ENSG0000031823 | GAGAAGA |
| ENSG0000031823 | GUGCCAC |
| ENSG0000031823 | UGAGAAG |
| ENSG0000032219 | AAAGUUU |
| ENSG0000032219 | AUAAUAC |
| ENSG0000032219 | AUGUCUG |
| ENSG0000032219 | CUGGGCA |
| ENSG0000032219 | GAAAACA |
| ENSG0000032219 | GCCCUUA |
| ENSG0000032219 | GCUUCCU |
| ENSG0000032219 | GGCAGCG |
| ENSG0000032219 | GGCAGUG |
| ENSG0000032219 | UAAUGCU |
| ENSG0000032219 | UCCUAUA |
| ENSG0000032219 | UCUAGAG |
| ENSG0000032219 | UGCAUAG |
| ENSG0000032219 | UGCAUAU |
| ENSG0000032219 | UUGGCAA |
| ENSG0000032219 | UUGGCAC |
| ENSG0000032389 | UCUCAAG |
| ENSG0000032444 | AGCAGCA |
| ENSG0000032444 | AGCAGCG |
| ENSG0000032444 | AGCAGCU |
| ENSG0000032444 | CAGCAGG |
| ENSG0000032444 | CAGUCCA |
| ENSG0000032444 | CCAGUGC |
| ENSG0000032444 | CCAGUGU |
| ENSG0000032444 | UGUGUGG |
| ENSG0000033050 | AAAAACC |
| ENSG0000033050 | AAGGCAC |
| ENSG0000033050 | ACAUCAC |
| ENSG0000033050 | AGGCAGG |
| ENSG0000033050 | AUUGCAC |
| ENSG0000033050 | CUGGGGG |
| ENSG0000033050 | GAGGCUG |
| ENSG0000033050 | GCAGCAU |
| ENSG0000033050 | GCAGGAC |
| ENSG0000033050 | GGGCCCC |
| ENSG0000033050 | GUCCAGA |
| ENSG0000033050 | UCCUGAG |
| ENSG0000033122 | AAGGCAC |
| ENSG0000033122 | CCAGCAU |
| ENSG0000033122 | GAGGCUG |
| ENSG0000033122 | GGCAGUG |
| ENSG0000033122 | GUGCUUG |
| ENSG0000033122 | UGUGCUU |
| ENSG0000033122 | UUGGUCC |
| ENSG0000033170 | GCACCAU |
| ENSG0000033178 | GAGAAAU |
| ENSG0000033178 | UCACAUU |
| ENSG0000033178 | UCCCUUG |
| ENSG0000033178 | UUUGCAC |
| ENSG0000033178 | UUUUUGC |
| ENSG0000033327 | AAAGAAU |
| ENSG0000033327 | AAGUGCU |
| ENSG0000033327 | AGCAAAA |
| ENSG0000033327 | AGCACCA |
| ENSG0000033327 | CAGCAAA |
| ENSG0000033327 | CCUGAG  |
| ENSG0000033327 | CCUGCUG |
| ENSG0000033327 | CCUGUAC |
| ENSG0000033327 | CCUUCAU |

|                 |          |
|-----------------|----------|
| ENSG00000033327 | CUGGCUC  |
| ENSG00000033327 | CUUUGGU  |
| ENSG00000033327 | GAGGCUG  |
| ENSG00000033327 | GAGGUAG  |
| ENSG00000033327 | GGACCUG  |
| ENSG00000033327 | GUGCUUG  |
| ENSG00000033327 | GUGGCC   |
| ENSG00000033327 | UCCCACC  |
| ENSG00000033327 | UCCUAG   |
| ENSG00000033627 | AGGCAGG  |
| ENSG00000033627 | CACCACC  |
| ENSG00000033627 | UCAUGAU  |
| ENSG00000033627 | UCCUGU   |
| ENSG00000033800 | AUACAAG  |
| ENSG00000033867 | AAAGUGC  |
| ENSG00000033867 | AAGGCAC  |
| ENSG00000033867 | AAGUGCA  |
| ENSG00000033867 | AGCAGCA  |
| ENSG00000033867 | AGUGCUU  |
| ENSG00000033867 | GAUUUC   |
| ENSG00000033867 | GGCUCUG  |
| ENSG00000033867 | UCCUGAG  |
| ENSG00000033867 | UUGGCAA  |
| ENSG00000034053 | AAAGCUG  |
| ENSG00000034053 | ACACACC  |
| ENSG00000034053 | ACACACU  |
| ENSG00000034053 | AGUGAUC  |
| ENSG00000034053 | CACUCCU  |
| ENSG00000034053 | GCCUGGG  |
| ENSG00000034053 | UACAAAG  |
| ENSG00000034053 | UAGUGAG  |
| ENSG00000034053 | UCACAGU  |
| ENSG00000034053 | UUGGCAC  |
| ENSG00000034063 | AACUACU  |
| ENSG00000034063 | AAGGCAC  |
| ENSG00000034063 | AAGUGCU  |
| ENSG00000034063 | AGUGCUU  |
| ENSG00000034063 | AUCCCUU  |
| ENSG00000034063 | AUGGCUU  |
| ENSG00000034063 | CCCUGUC  |
| ENSG00000034063 | CUGCAGC  |
| ENSG00000034063 | GAGAACC  |
| ENSG00000034063 | GAGGUAG  |
| ENSG00000034063 | GUCUGCC  |
| ENSG00000034063 | UCAUUUG  |
| ENSG00000034063 | UCCAGUU  |
| ENSG00000034063 | UCCUGU   |
| ENSG00000034152 | AGCUUUAU |
| ENSG00000034152 | AUACAAG  |
| ENSG00000034152 | GUGCAA   |
| ENSG00000034510 | CACAGUG  |
| ENSG00000034510 | UCACAGU  |
| ENSG00000034677 | AAGGCAC  |
| ENSG00000034677 | AUACAAG  |
| ENSG00000034677 | CUGCAGC  |
| ENSG00000034677 | GCACCAU  |
| ENSG00000034677 | GCAGCAU  |
| ENSG00000034713 | CAA AUGC |
| ENSG00000034713 | UCCAGUU  |
| ENSG00000035141 | GUCCAGA  |
| ENSG00000035403 | AGCACCA  |
| ENSG00000035403 | AUAAAGU  |
| ENSG00000035403 | AUUGCAC  |
| ENSG00000035403 | CAA AUGC |

|                 |         |
|-----------------|---------|
| ENSG00000035403 | CUAUACA |
| ENSG00000035403 | CUGCAGG |
| ENSG00000035403 | CUUUGGU |
| ENSG00000035403 | GGAAGAC |
| ENSG00000035403 | GGAGGCA |
| ENSG00000035403 | GGCAGUG |
| ENSG00000035403 | UAAUAUC |
| ENSG00000035403 | UGCAUUG |
| ENSG00000035403 | UUGGCAA |
| ENSG00000035403 | UUGGCAC |
| ENSG00000035499 | ACUCAA  |
| ENSG00000035499 | AGUAACA |
| ENSG00000035499 | CCAGUGU |
| ENSG00000035499 | GUAACAG |
| ENSG00000035499 | UCACAGU |
| ENSG00000035664 | AAAAAUC |
| ENSG00000035664 | CAAAGUG |
| ENSG00000035664 | CAGACAG |
| ENSG00000035664 | GCUGGUG |
| ENSG00000035664 | UCACAGG |
| ENSG00000035664 | UGCAAAG |
| ENSG00000035681 | AAGUCAC |
| ENSG00000035681 | GGUUUAC |
| ENSG00000035681 | UUGGUUC |
| ENSG00000035862 | AAAGUGC |
| ENSG00000035862 | AACAAAC |
| ENSG00000035862 | AAGUGCA |
| ENSG00000035862 | AGUGCAA |
| ENSG00000035862 | AUAAUAC |
| ENSG00000035862 | AUGACAC |
| ENSG00000035862 | CAAAGCA |
| ENSG00000035862 | CAAAGUC |
| ENSG00000035862 | CAGUCUG |
| ENSG00000035862 | CCAGGAG |
| ENSG00000035862 | CUGCUC  |
| ENSG00000035862 | GCUACAU |
| ENSG00000035862 | GGUGGGC |
| ENSG00000035862 | GUAAACA |
| ENSG00000035862 | UAAUACA |
| ENSG00000035862 | UACAAAG |
| ENSG00000035862 | UCUCAAG |
| ENSG00000035862 | UGACAUC |
| ENSG00000035862 | UUUCAAC |
| ENSG00000035928 | AAAUUUC |
| ENSG00000035928 | CACCACC |
| ENSG00000035928 | CUACAAA |
| ENSG00000036257 | AAAAACC |
| ENSG00000036257 | AAAGUGC |
| ENSG00000036257 | AAGUGCU |
| ENSG00000036257 | AAUCACU |
| ENSG00000036257 | AAUCCUU |
| ENSG00000036257 | AAUCUCA |
| ENSG00000036257 | ACAAUAU |
| ENSG00000036257 | ACAUCAC |
| ENSG00000036257 | ACAUUCA |
| ENSG00000036257 | AGCAAAA |
| ENSG00000036257 | AGCUGCC |
| ENSG00000036257 | AGUGCAA |
| ENSG00000036257 | AGUGGUU |
| ENSG00000036257 | AUACAAG |
| ENSG00000036257 | AUAUAAC |
| ENSG00000036257 | AUCCUUG |
| ENSG00000036257 | AUGAGCU |
| ENSG00000036257 | AUUGCAC |

|                 |          |
|-----------------|----------|
| ENSG00000036257 | CAAAGCA  |
| ENSG00000036257 | CAAAGUG  |
| ENSG00000036257 | CUAUACA  |
| ENSG00000036257 | GACCUGG  |
| ENSG00000036257 | GAGGCUG  |
| ENSG00000036257 | GGAAGCC  |
| ENSG00000036257 | GUCUACU  |
| ENSG00000036257 | GUGCUUG  |
| ENSG00000036257 | UAGACUG  |
| ENSG00000036257 | UCAACAG  |
| ENSG00000036257 | UGAAGCU  |
| ENSG00000036257 | UGUGCUU  |
| ENSG00000036257 | UUGGAGG  |
| ENSG00000036530 | GAGGUAG  |
| ENSG00000036549 | AAAAAUC  |
| ENSG00000036549 | AAAGAAU  |
| ENSG00000036549 | AAAGAGG  |
| ENSG00000036549 | ACACACC  |
| ENSG00000036549 | ACAUCAC  |
| ENSG00000036549 | ACAUUAC  |
| ENSG00000036549 | ACAUUCA  |
| ENSG00000036549 | AGCAGCU  |
| ENSG00000036549 | AGGCAGG  |
| ENSG00000036549 | AGUGCUG  |
| ENSG00000036549 | AGUGCUU  |
| ENSG00000036549 | AUGAGCU  |
| ENSG00000036549 | AUGAUGC  |
| ENSG00000036549 | CAAACU   |
| ENSG00000036549 | CACAGUG  |
| ENSG00000036549 | CAGUUAC  |
| ENSG00000036549 | CUACAAA  |
| ENSG00000036549 | CUCACAC  |
| ENSG00000036549 | GAAACAU  |
| ENSG00000036549 | GAGGCAG  |
| ENSG00000036549 | GCAGAAG  |
| ENSG00000036549 | GGAAUGU  |
| ENSG00000036549 | GUCAGUU  |
| ENSG00000036549 | UCACACA  |
| ENSG00000036549 | UCACAGU  |
| ENSG00000036565 | CAGGUGA  |
| ENSG00000036565 | GCAGAAG  |
| ENSG00000036672 | AGCAGCA  |
| ENSG00000036672 | AGCAGCU  |
| ENSG00000036672 | GGCUCAG  |
| ENSG00000036828 | AAUACUG  |
| ENSG00000036828 | AGCAGCG  |
| ENSG00000036828 | AUAAUAC  |
| ENSG00000037280 | CUCUUC   |
| ENSG00000037749 | GCACCAU  |
| ENSG00000037965 | AAAGCGC  |
| ENSG00000037965 | AACAAAC  |
| ENSG00000037965 | ACAAUUAU |
| ENSG00000037965 | AGCAGCA  |
| ENSG00000037965 | AGGCAGG  |
| ENSG00000037965 | AGUGAUC  |
| ENSG00000037965 | AGUGCAA  |
| ENSG00000037965 | AUACAAG  |
| ENSG00000037965 | AUUGCAC  |
| ENSG00000037965 | CUAUACA  |
| ENSG00000037965 | GUAUGUU  |
| ENSG00000037965 | UAGGUUU  |
| ENSG00000037965 | UAUUGCU  |
| ENSG00000037965 | UCAUAGA  |
| ENSG00000037965 | UCCCUUG  |

|                 |          |
|-----------------|----------|
| ENSG00000038210 | CCCUGAG  |
| ENSG00000038210 | GUAAACA  |
| ENSG00000038210 | UCCUGU   |
| ENSG00000038274 | AAAGUGC  |
| ENSG00000038274 | AAAGUUU  |
| ENSG00000038274 | AUAAAGU  |
| ENSG00000038274 | CAAGAGC  |
| ENSG00000038274 | CACAAUG  |
| ENSG00000038274 | UGCAAAG  |
| ENSG00000038274 | UUGAUCA  |
| ENSG00000038295 | AGCAGCA  |
| ENSG00000038295 | AGUAGUU  |
| ENSG00000038295 | GCACCAU  |
| ENSG00000038295 | GGCUCAG  |
| ENSG00000038382 | AAUACUG  |
| ENSG00000038382 | CAGGUGA  |
| ENSG00000038382 | UAUUACC  |
| ENSG00000038427 | AAGGCAC  |
| ENSG00000038532 | ACAAGGU  |
| ENSG00000038532 | ACAUUAC  |
| ENSG00000038532 | AUUGCAC  |
| ENSG00000038532 | CCCUGAG  |
| ENSG00000038532 | GUCUUGC  |
| ENSG00000038532 | UCAUUUG  |
| ENSG00000039068 | AACAAAC  |
| ENSG00000039068 | ACUCAA   |
| ENSG00000039068 | CUUUGGU  |
| ENSG00000039068 | UGGCUGC  |
| ENSG00000039319 | GAGGUAG  |
| ENSG00000039319 | UCAUUUG  |
| ENSG00000039319 | UCCUGAG  |
| ENSG00000039319 | UCUUGAG  |
| ENSG00000039523 | AUAUUAU  |
| ENSG00000039523 | GGAGGCA  |
| ENSG00000039560 | AAAAAUC  |
| ENSG00000039560 | AGUAACA  |
| ENSG00000039560 | CACAGUG  |
| ENSG00000039560 | CUUUGGU  |
| ENSG00000039560 | GAGGCAG  |
| ENSG00000039560 | GGAUUUC  |
| ENSG00000039560 | GUAAACA  |
| ENSG00000039560 | GUUAAUG  |
| ENSG00000039560 | UCCCUUG  |
| ENSG00000039560 | UCCUGAG  |
| ENSG00000039560 | UGCAUUAU |
| ENSG00000039560 | UGUUGAA  |
| ENSG00000039560 | UUGGAGG  |
| ENSG00000039600 | UGCAUUAU |
| ENSG00000039600 | UUCAAAU  |
| ENSG00000039987 | AGGCAGG  |
| ENSG00000040341 | GGCAAGA  |
| ENSG00000040487 | GAGGUAG  |
| ENSG00000040487 | GAGGUAU  |
| ENSG00000040531 | AAGGCAC  |
| ENSG00000040531 | ACCAGCA  |
| ENSG00000040531 | CACACCU  |
| ENSG00000040531 | CACCAGC  |
| ENSG00000040531 | CCCACCU  |
| ENSG00000040531 | GAGGUAG  |
| ENSG00000040531 | GGCAGGG  |
| ENSG00000040531 | GGCCUG   |
| ENSG00000040531 | GUGAGGU  |
| ENSG00000040531 | UUGGAGG  |
| ENSG00000040608 | GUAAACA  |

|                 |          |
|-----------------|----------|
| ENSG00000040608 | UCUGGAA  |
| ENSG00000040633 | AAAAAUC  |
| ENSG00000040633 | CCCUGAG  |
| ENSG00000040633 | GACAACU  |
| ENSG00000040633 | GGCUCAG  |
| ENSG00000040731 | AAAAAUC  |
| ENSG00000041357 | UGAAAUG  |
| ENSG00000041515 | AGCACCA  |
| ENSG00000041515 | AGUGUGC  |
| ENSG00000041515 | CUACAAA  |
| ENSG00000041515 | GUGCUUG  |
| ENSG00000041515 | UACAAAG  |
| ENSG00000041515 | UAUAAAAG |
| ENSG00000041515 | UGUGCUU  |
| ENSG00000041982 | AAAAGUA  |
| ENSG00000041982 | AAAGUAC  |
| ENSG00000041982 | AUAUUAU  |
| ENSG00000041982 | AUGACAC  |
| ENSG00000041982 | CUCUGGG  |
| ENSG00000041982 | GUGCUUG  |
| ENSG00000041982 | UGUCUUU  |
| ENSG00000041988 | CAGCAGG  |
| ENSG00000041988 | GGGUUUA  |
| ENSG00000042286 | AUUGCAC  |
| ENSG00000042286 | GAGGCUG  |
| ENSG00000042286 | UAUUGCU  |
| ENSG00000042429 | GUGCUUG  |
| ENSG00000042429 | UUCAAAU  |
| ENSG00000042445 | CUGACUC  |
| ENSG00000042781 | AAUACUG  |
| ENSG00000042781 | UUGACAC  |
| ENSG00000042781 | UUGGCAA  |
| ENSG00000043039 | AACAAAC  |
| ENSG00000043039 | AAGGCAC  |
| ENSG00000043039 | AAGUCUU  |
| ENSG00000043039 | AAGUGCA  |
| ENSG00000043039 | AGUGCUG  |
| ENSG00000043039 | CAGCAA   |
| ENSG00000043039 | UACAAAG  |
| ENSG00000043093 | AAGUGCU  |
| ENSG00000043093 | CAGCAGA  |
| ENSG00000043093 | GAGGAUA  |
| ENSG00000043093 | GUGCAA   |
| ENSG00000043093 | GUGCUUG  |
| ENSG00000043093 | UUGGCAA  |
| ENSG00000043143 | AAAGAAU  |
| ENSG00000043143 | AACAAAC  |
| ENSG00000043143 | AAUUGCU  |
| ENSG00000043143 | ACAUCAC  |
| ENSG00000043143 | ACAUUCA  |
| ENSG00000043143 | ACUGGCC  |
| ENSG00000043143 | AGCAGCU  |
| ENSG00000043143 | AGUGCUU  |
| ENSG00000043143 | AUAUUAU  |
| ENSG00000043143 | AUCCUUU  |
| ENSG00000043143 | AUUGCAC  |
| ENSG00000043143 | CACAGUG  |
| ENSG00000043143 | CUGGGCA  |
| ENSG00000043143 | CUGGGGG  |
| ENSG00000043143 | CUUUGGU  |
| ENSG00000043143 | GAAAACA  |
| ENSG00000043143 | GAAACAU  |
| ENSG00000043143 | GAAGGAA  |
| ENSG00000043143 | GAGAAAU  |



|                 |          |
|-----------------|----------|
| ENSG00000043143 | GAGCCCC  |
| ENSG00000043143 | GAGCUAA  |
| ENSG00000043143 | GGGCCCC  |
| ENSG00000043143 | GUGUCAC  |
| ENSG00000043143 | UACAAAG  |
| ENSG00000043143 | UAUUGCU  |
| ENSG00000043143 | UCCCUGU  |
| ENSG00000043143 | UCUCCAA  |
| ENSG00000043143 | UGCAAAG  |
| ENSG00000043143 | UGGCCCU  |
| ENSG00000043143 | UGUGCUU  |
| ENSG00000043143 | UUGGCAA  |
| ENSG00000043143 | UUGGCAC  |
| ENSG00000043143 | UUGUGAC  |
| ENSG00000043143 | UUUGCAA  |
| ENSG00000043355 | UUGGCAA  |
| ENSG00000043355 | UUGGCAC  |
| ENSG00000043514 | CCUGCUG  |
| ENSG00000043514 | UCUGGAA  |
| ENSG00000043591 | AAGUGCU  |
| ENSG00000043591 | ACAGUAU  |
| ENSG00000043591 | AGUAACA  |
| ENSG00000043591 | AGUAGUU  |
| ENSG00000043591 | AUGGAUU  |
| ENSG00000043591 | CAGUAGU  |
| ENSG00000043591 | CAGUUAC  |
| ENSG00000043591 | GAGGUAG  |
| ENSG00000043591 | GAGGUAU  |
| ENSG00000043591 | GCACCAU  |
| ENSG00000043591 | GUAAACA  |
| ENSG00000043591 | GUGAGGU  |
| ENSG00000043591 | UAAUAUC  |
| ENSG00000043591 | UAUUGCU  |
| ENSG00000043591 | UGUGCUU  |
| ENSG00000044115 | AACACUG  |
| ENSG00000044115 | CUGCAGC  |
| ENSG00000044115 | UUGGUUC  |
| ENSG00000044446 | CACAGGG  |
| ENSG00000044446 | CAGACAG  |
| ENSG00000044446 | GUCACUC  |
| ENSG00000044446 | UGUGUCA  |
| ENSG00000044459 | CAAAGCA  |
| ENSG00000044459 | UCAUACA  |
| ENSG00000044524 | AAGGCAC  |
| ENSG00000044524 | ACAUUAC  |
| ENSG00000044524 | UAUAAAAG |
| ENSG00000044574 | AAGACAU  |
| ENSG00000044574 | ACAUUCA  |
| ENSG00000044574 | CAAUUGC  |
| ENSG00000044574 | CCAGUAC  |
| ENSG00000044574 | CCAGUGU  |
| ENSG00000044574 | GGUAGAC  |
| ENSG00000044574 | GUAAACA  |
| ENSG00000044574 | GUCACUC  |
| ENSG00000044574 | GUGUCAC  |
| ENSG00000044574 | UAUGGUU  |
| ENSG00000044574 | UUUCAAC  |
| ENSG00000046647 | AAUUUUA  |
| ENSG00000046647 | AUAAAAGU |
| ENSG00000046647 | UGUGUCA  |
| ENSG00000046651 | CUGGGCA  |
| ENSG00000046653 | AGCCCUU  |
| ENSG00000046653 | AUCACUA  |
| ENSG00000046653 | GGAAGCC  |

|                 |         |
|-----------------|---------|
| ENSG00000046653 | GUUAGGA |
| ENSG00000046653 | UACAAAG |
| ENSG00000046653 | UUGGCAC |
| ENSG00000047056 | ACAUUCA |
| ENSG00000047056 | ACUGUUU |
| ENSG00000047056 | AGGUAGU |
| ENSG00000047056 | AUGUAAU |
| ENSG00000047056 | AUUGCAC |
| ENSG00000047056 | CUCAAAC |
| ENSG00000047056 | CUGGACU |
| ENSG00000047056 | GAGGUAG |
| ENSG00000047056 | GAGGUAU |
| ENSG00000047056 | GCUACAU |
| ENSG00000047056 | GGCAGUG |
| ENSG00000047056 | UAAUAUC |
| ENSG00000047056 | UCACAGG |
| ENSG00000047056 | UCACAGU |
| ENSG00000047056 | UCCUGAG |
| ENSG00000047056 | UCUGGAA |
| ENSG00000047056 | UCUGGAG |
| ENSG00000047056 | UGUCUUU |
| ENSG00000047249 | AUCCUUU |
| ENSG00000047249 | UGAGAAU |
| ENSG00000047346 | UCCAGUU |
| ENSG00000047346 | UGUGCUU |
| ENSG00000047578 | ACAGUUA |
| ENSG00000047578 | AGCUGCC |
| ENSG00000047578 | CCCUGAG |
| ENSG00000047578 | UAAUAUC |
| ENSG00000047578 | UGCAUAU |
| ENSG00000047597 | AAAGUUU |
| ENSG00000047597 | GAGGCAG |
| ENSG00000047597 | GAGGUAG |
| ENSG00000047597 | GAGGUAU |
| ENSG00000047621 | GGAAUGU |
| ENSG00000047634 | UGCAUAU |
| ENSG00000047644 | AAAUUUC |
| ENSG00000047644 | AAGGCAC |
| ENSG00000047644 | AAGUCAC |
| ENSG00000047644 | ACUGCAG |
| ENSG00000047644 | AUAUUAU |
| ENSG00000047644 | CCCUGUU |
| ENSG00000047644 | GCCCUGU |
| ENSG00000047644 | GCCUGAU |
| ENSG00000047644 | UAAUAGU |
| ENSG00000047644 | UCACAAG |
| ENSG00000047644 | UCCCACC |
| ENSG00000047644 | UCCCUUG |
| ENSG00000047644 | UUUGCAC |
| ENSG00000047849 | AAACUGU |
| ENSG00000047849 | AAGUCAC |
| ENSG00000047849 | CCAGGAG |
| ENSG00000047849 | CCAGUGU |
| ENSG00000047849 | GAAGGUC |
| ENSG00000047849 | GCAGCAU |
| ENSG00000047849 | UGCAGCU |
| ENSG00000047849 | UGCUCAC |
| ENSG00000047932 | ACUAGAU |
| ENSG00000047932 | ACUAAA  |
| ENSG00000047932 | CCCUGAG |
| ENSG00000047932 | CUUUGGU |
| ENSG00000047932 | GAGGUAG |
| ENSG00000047932 | GAGGUAU |
| ENSG00000047932 | UAUAAUA |

|                 |         |
|-----------------|---------|
| ENSG00000048028 | GCUGUCU |
| ENSG00000048028 | UAUAAAG |
| ENSG00000048028 | UAUUGCU |
| ENSG00000048052 | UAAUACA |
| ENSG00000048140 | CUGGACU |
| ENSG00000048392 | AAGGCAC |
| ENSG00000048392 | CAAAGCA |
| ENSG00000048392 | UAUUGCU |
| ENSG00000048392 | UCACACA |
| ENSG00000048405 | ACAUCAC |
| ENSG00000048405 | AGUGCUU |
| ENSG00000048405 | GAUUGUC |
| ENSG00000048471 | AAAGAGC |
| ENSG00000048471 | AACAAAC |
| ENSG00000048471 | AGAUAAA |
| ENSG00000048471 | AGUGGUU |
| ENSG00000048471 | AUAAUAC |
| ENSG00000048471 | GCUACAU |
| ENSG00000048471 | GUAACA  |
| ENSG00000048471 | GUAACAG |
| ENSG00000048471 | UAUAAAG |
| ENSG00000048471 | UUGGCAC |
| ENSG00000048540 | AAAUGGU |
| ENSG00000048540 | AAGGCAC |
| ENSG00000048540 | AAGUGCU |
| ENSG00000048540 | ACAGUAC |
| ENSG00000048540 | ACAGUAU |
| ENSG00000048540 | ACCAGCA |
| ENSG00000048540 | ACUAGAU |
| ENSG00000048540 | AGUGCUG |
| ENSG00000048540 | AUGGCAC |
| ENSG00000048540 | CACCAGC |
| ENSG00000048540 | CAGGUGA |
| ENSG00000048540 | CAGUAGU |
| ENSG00000048540 | CUCUCC  |
| ENSG00000048540 | GAUUGUC |
| ENSG00000048540 | GGGGUGC |
| ENSG00000048540 | GGGGUGG |
| ENSG00000048540 | GUAGUGU |
| ENSG00000048540 | GUGCUUG |
| ENSG00000048540 | GUGUCAC |
| ENSG00000048540 | UGUGUCA |
| ENSG00000048540 | UUCAAAU |
| ENSG00000048544 | UGCUCAC |
| ENSG00000048649 | AAGUGCU |
| ENSG00000048649 | ACUGGCC |
| ENSG00000048649 | AGUGCUU |
| ENSG00000048649 | GACCAUG |
| ENSG00000048649 | UAUAAAG |
| ENSG00000048707 | AAAGAGG |
| ENSG00000048707 | AGCAGCU |
| ENSG00000048707 | CCUGCUG |
| ENSG00000048707 | CUUGGAG |
| ENSG00000048707 | GUCUUGC |
| ENSG00000048707 | GUGCAA  |
| ENSG00000048707 | GUGGCC  |
| ENSG00000048707 | UCAUUUG |
| ENSG00000048707 | UGUGUCA |
| ENSG00000048707 | UUGUGUC |
| ENSG00000048828 | AAAGAGG |
| ENSG00000048828 | AACGGCU |
| ENSG00000048828 | AACUACU |
| ENSG00000048828 | AAGUUGU |
| ENSG00000048828 | AAUCACU |

|                 |         |
|-----------------|---------|
| ENSG00000048828 | ACACACC |
| ENSG00000048828 | AUCACUA |
| ENSG00000048828 | CAUAUUG |
| ENSG00000048828 | CCUUCAU |
| ENSG00000048828 | CUUCACC |
| ENSG00000048828 | GGCAGGG |
| ENSG00000048828 | UAUAUGA |
| ENSG00000048828 | UCAUUCG |
| ENSG00000048828 | UGCAAAG |
| ENSG00000048828 | UGCAUUG |
| ENSG00000048828 | UUUGCAC |
| ENSG00000048991 | AUACAAG |
| ENSG00000049130 | AAAAGUA |
| ENSG00000049130 | ACAGUAC |
| ENSG00000049130 | ACUCCAG |
| ENSG00000049130 | AGUAACA |
| ENSG00000049130 | CACAGUG |
| ENSG00000049130 | CACUCCU |
| ENSG00000049130 | CCUGCUG |
| ENSG00000049130 | CUGACUC |
| ENSG00000049130 | GUAACAG |
| ENSG00000049130 | UCACAGG |
| ENSG00000049130 | UCAUUUG |
| ENSG00000049130 | UGGAGAU |
| ENSG00000049167 | AAAGUUU |
| ENSG00000049192 | AAAAAUC |
| ENSG00000049192 | AAAGGUA |
| ENSG00000049192 | AACAGUC |
| ENSG00000049192 | AAUGCCC |
| ENSG00000049192 | ACAUUCA |
| ENSG00000049192 | ACCACAG |
| ENSG00000049192 | AGAUAAA |
| ENSG00000049192 | AGCAGCA |
| ENSG00000049192 | AGUGGUU |
| ENSG00000049192 | AUGGAUU |
| ENSG00000049192 | CACAGGG |
| ENSG00000049192 | CACUCCU |
| ENSG00000049192 | CCAGCAU |
| ENSG00000049192 | CUCUGGG |
| ENSG00000049192 | CUGGAAA |
| ENSG00000049192 | GAAACAU |
| ENSG00000049192 | GAGGUAG |
| ENSG00000049192 | GAGGUAU |
| ENSG00000049192 | GAGUAUU |
| ENSG00000049192 | GCCUGGA |
| ENSG00000049192 | GCUACAU |
| ENSG00000049192 | GGCUCAG |
| ENSG00000049192 | GGCUCUG |
| ENSG00000049192 | GGUUACC |
| ENSG00000049192 | GUCCAGA |
| ENSG00000049192 | GUGAGGU |
| ENSG00000049192 | UAUAAUA |
| ENSG00000049192 | UCAAGUA |
| ENSG00000049192 | UCACAGG |
| ENSG00000049192 | UCACAGU |
| ENSG00000049192 | UCACAUU |
| ENSG00000049192 | UCUCCAA |
| ENSG00000049192 | UCUGGAA |
| ENSG00000049192 | UGGCCAC |
| ENSG00000049239 | CCCCCAG |
| ENSG00000049245 | AGGCAGG |
| ENSG00000049245 | CUUUGGU |
| ENSG00000049245 | GCAGGUU |
| ENSG00000049245 | GUAGUGU |

|                 |         |
|-----------------|---------|
| ENSG00000049245 | UGCAUAU |
| ENSG00000049245 | UUGGUCC |
| ENSG00000049246 | AAGGCAC |
| ENSG00000049246 | CUUCUCU |
| ENSG00000049246 | GAAGGAA |
| ENSG00000049246 | GAGCCCC |
| ENSG00000049246 | GCAGCAU |
| ENSG00000049246 | GUAAACA |
| ENSG00000049247 | ACAUAGA |
| ENSG00000049283 | UCCAGUU |
| ENSG00000049283 | UUGUGAC |
| ENSG00000049319 | AGCAGCU |
| ENSG00000049319 | CAGCAGA |
| ENSG00000049319 | CAGCAGG |
| ENSG00000049323 | CAGUGCA |
| ENSG00000049323 | UUGGUCC |
| ENSG00000049449 | GAGGUAG |
| ENSG00000049540 | ACAGUAC |
| ENSG00000049540 | ACAGUAU |
| ENSG00000049540 | ACAUUCA |
| ENSG00000049540 | AGUACUG |
| ENSG00000049540 | GGGGUCC |
| ENSG00000049540 | GGUGGGC |
| ENSG00000049540 | GGUUUAC |
| ENSG00000049540 | UCUCCAA |
| ENSG00000049540 | UGGGUAC |
| ENSG00000049618 | AAGUUGU |
| ENSG00000049618 | AGCCAGU |
| ENSG00000049618 | AGUGCUU |
| ENSG00000049618 | AUAAAGU |
| ENSG00000049618 | CACAGUG |
| ENSG00000049618 | CUCACAC |
| ENSG00000049618 | GAAGGUC |
| ENSG00000049618 | UCACACA |
| ENSG00000049618 | UGAAAUG |
| ENSG00000049656 | GAAACAU |
| ENSG00000049656 | GAGAAAU |
| ENSG00000049656 | UGAUCCA |
| ENSG00000049656 | UUGAUCA |
| ENSG00000049656 | UUGGCAC |
| ENSG00000049759 | AAAAGUA |
| ENSG00000049759 | AAUACUG |
| ENSG00000049759 | AGUGCCU |
| ENSG00000049759 | AUAAAGU |
| ENSG00000049759 | AUACCUC |
| ENSG00000049759 | AUUCAUU |
| ENSG00000049759 | AUUGCAC |
| ENSG00000049759 | CAAUAGC |
| ENSG00000049759 | GGCUCAG |
| ENSG00000049759 | GUAAACA |
| ENSG00000049759 | UCACAUU |
| ENSG00000049759 | UCCAGUU |
| ENSG00000049759 | UGAAAUG |
| ENSG00000049768 | AGGCAGG |
| ENSG00000049768 | CAUGGAU |
| ENSG00000049769 | AAAAAUC |
| ENSG00000049769 | AAAGCUG |
| ENSG00000049769 | AUAAUAC |
| ENSG00000049769 | AUAUAAC |
| ENSG00000049769 | CCAGCAU |
| ENSG00000049769 | CUCCAGC |
| ENSG00000049769 | GCAGGUU |
| ENSG00000049769 | GGGUAAG |
| ENSG00000049769 | GUAAAUG |

|                 |         |
|-----------------|---------|
| ENSG00000049769 | UAUAAUA |
| ENSG00000049769 | UCAUAGA |
| ENSG00000049769 | UCCAGAG |
| ENSG00000050030 | AAACUGU |
| ENSG00000050030 | AAAGCUG |
| ENSG00000050030 | AAAGUAU |
| ENSG00000050030 | AACUACU |
| ENSG00000050030 | AAUCACU |
| ENSG00000050030 | ACCACAG |
| ENSG00000050030 | AGCAGCU |
| ENSG00000050030 | AGGCAGG |
| ENSG00000050030 | AGUGAUC |
| ENSG00000050030 | AGUGCAA |
| ENSG00000050030 | AUCACUA |
| ENSG00000050030 | AUGACAC |
| ENSG00000050030 | CUACAAA |
| ENSG00000050030 | CUACAGU |
| ENSG00000050030 | CUAGUAG |
| ENSG00000050030 | GAAACAU |
| ENSG00000050030 | GAGAUGA |
| ENSG00000050030 | GAGGUAG |
| ENSG00000050030 | GAGGUAU |
| ENSG00000050030 | GCACCAU |
| ENSG00000050030 | GGGGUGG |
| ENSG00000050030 | GGGUGGU |
| ENSG00000050030 | GGUGGUU |
| ENSG00000050030 | UCACAGG |
| ENSG00000050030 | UCACAGU |
| ENSG00000050030 | UCCAGUU |
| ENSG00000050030 | UCCCACC |
| ENSG00000050030 | UGUGCUU |
| ENSG00000050030 | UUCAAAU |
| ENSG00000050030 | UUGACAC |
| ENSG00000050165 | AGGAGCU |
| ENSG00000050165 | AUACAAG |
| ENSG00000050165 | GAGGUAG |
| ENSG00000050165 | GUGCAAA |
| ENSG00000050165 | UUAUGCA |
| ENSG00000050327 | UCACAUU |
| ENSG00000050405 | AAACUGU |
| ENSG00000050405 | AAGUGCA |
| ENSG00000050405 | GCCCUUA |
| ENSG00000050426 | ACUGCAG |
| ENSG00000050426 | ACUUGGA |
| ENSG00000050426 | AGUGCUU |
| ENSG00000050426 | AUGCAUU |
| ENSG00000050426 | CCCACCU |
| ENSG00000050426 | CUGCAGG |
| ENSG00000050426 | UUGGUCC |
| ENSG00000050438 | AAGGCAC |
| ENSG00000050438 | ACUUGGA |
| ENSG00000050438 | AUGAUGA |
| ENSG00000050438 | CCAGUGU |
| ENSG00000050438 | CCCUGAG |
| ENSG00000050438 | CUUACAG |
| ENSG00000050438 | GCUGGUG |
| ENSG00000050438 | GUCUUGC |
| ENSG00000050438 | UACAGUU |
| ENSG00000050438 | UCCUGU  |
| ENSG00000050628 | AAAGUGC |
| ENSG00000050628 | AAUUAUU |
| ENSG00000050628 | CAAAGCA |
| ENSG00000050628 | CACAGUG |
| ENSG00000050628 | UCUAGAG |

|                 |         |
|-----------------|---------|
| ENSG00000050628 | UCCAUA  |
| ENSG00000050628 | UUGCAA  |
| ENSG00000050628 | UUGUGC  |
| ENSG00000050748 | UGCUCAC |
| ENSG00000050767 | AUAUUAU |
| ENSG00000050767 | CAGGUGA |
| ENSG00000050767 | UACAAAG |
| ENSG00000050767 | UAUUACC |
| ENSG00000050820 | GAUUGGU |
| ENSG00000051009 | AUUGCAC |
| ENSG00000051009 | GAUUGC  |
| ENSG00000051009 | UCUCAA  |
| ENSG00000051180 | GACCUGG |
| ENSG00000051180 | GUGACUG |
| ENSG00000051341 | AAAGUGC |
| ENSG00000051341 | AAGUGCU |
| ENSG00000051341 | AGCAAAA |
| ENSG00000051341 | GAGGCAG |
| ENSG00000051341 | UUUCAAC |
| ENSG00000052126 | CCAGUAC |
| ENSG00000052344 | CAGUCCA |
| ENSG00000052344 | CCGGAGC |
| ENSG00000052344 | GGAGUCC |
| ENSG00000052344 | GGCAAGA |
| ENSG00000052344 | GGCUCAG |
| ENSG00000052795 | AAAGAGC |
| ENSG00000052795 | AACAUUC |
| ENSG00000052795 | AAGGCAC |
| ENSG00000052795 | CUUUGGU |
| ENSG00000052795 | UAAGACG |
| ENSG00000052795 | UAAGACU |
| ENSG00000052795 | UCCUGAG |
| ENSG00000052802 | AAAAAUC |
| ENSG00000052802 | AAGUGCA |
| ENSG00000052802 | AGUGCAA |
| ENSG00000052802 | GUCAGUU |
| ENSG00000052802 | UCACAUU |
| ENSG00000052802 | UUCUGCA |
| ENSG00000052850 | AAAGUGC |
| ENSG00000052850 | AAGUGCU |
| ENSG00000052850 | AGUGCUG |
| ENSG00000053108 | AAAAAUC |
| ENSG00000053108 | AAAGUGC |
| ENSG00000053108 | AAAUUUC |
| ENSG00000053108 | AAGGCAC |
| ENSG00000053108 | AGCAGCU |
| ENSG00000053108 | AGGCAGG |
| ENSG00000053108 | AUAAAGU |
| ENSG00000053108 | AUCAUAC |
| ENSG00000053108 | CCAGUGU |
| ENSG00000053108 | GCAGCAU |
| ENSG00000053108 | GGCAGGG |
| ENSG00000053108 | GUCUGCC |
| ENSG00000053108 | UAUAAAG |
| ENSG00000053108 | UGCCUG  |
| ENSG00000053108 | UGUUGAA |
| ENSG00000053254 | AAAAACC |
| ENSG00000053254 | AAAGUAU |
| ENSG00000053254 | AAAGUUU |
| ENSG00000053254 | AAAUCCC |
| ENSG00000053254 | AAAUUUC |
| ENSG00000053254 | AACAGUC |
| ENSG00000053254 | AACUGGU |
| ENSG00000053254 | AAGUCUU |

|                 |          |
|-----------------|----------|
| ENSG00000053254 | AAUUUUA  |
| ENSG00000053254 | ACAAUUAU |
| ENSG00000053254 | ACACACC  |
| ENSG00000053254 | ACAUUAC  |
| ENSG00000053254 | ACUCCAG  |
| ENSG00000053254 | AGCACCA  |
| ENSG00000053254 | AGGACAC  |
| ENSG00000053254 | AGGUUAU  |
| ENSG00000053254 | AGUAGUU  |
| ENSG00000053254 | AGUGCUG  |
| ENSG00000053254 | AUCAUAC  |
| ENSG00000053254 | AUGCAUU  |
| ENSG00000053254 | CAAGAGC  |
| ENSG00000053254 | CACAAUG  |
| ENSG00000053254 | CACAGUG  |
| ENSG00000053254 | CAGGCUC  |
| ENSG00000053254 | CCCUGAG  |
| ENSG00000053254 | CUAUACA  |
| ENSG00000053254 | CUGGGCA  |
| ENSG00000053254 | CUUGGAG  |
| ENSG00000053254 | CUUUGGU  |
| ENSG00000053254 | GAGGUUAU |
| ENSG00000053254 | GCACCAU  |
| ENSG00000053254 | GCAGGUU  |
| ENSG00000053254 | GGAGGAG  |
| ENSG00000053254 | GUCAACA  |
| ENSG00000053254 | GUGCUUG  |
| ENSG00000053254 | UAGUGAG  |
| ENSG00000053254 | UCACAAG  |
| ENSG00000053254 | UCACAGU  |
| ENSG00000053254 | UCUGGAG  |
| ENSG00000053254 | UGAAGCU  |
| ENSG00000053254 | UGAGAAU  |
| ENSG00000053254 | UGAUCCA  |
| ENSG00000053254 | UGCAUAG  |
| ENSG00000053254 | UGCAUUAU |
| ENSG00000053254 | UGCCUG   |
| ENSG00000053254 | UGCUGAC  |
| ENSG00000053254 | UGGCCAC  |
| ENSG00000053254 | UUAUGCA  |
| ENSG00000053254 | UUGAGGC  |
| ENSG00000053254 | UUGGCAC  |
| ENSG00000053254 | UUGGUCC  |
| ENSG00000053372 | CAGCAAA  |
| ENSG00000053438 | ACAAUUAU |
| ENSG00000053438 | CCCUGUU  |
| ENSG00000053438 | CUGGCUC  |
| ENSG00000053438 | GAUCAGA  |
| ENSG00000053438 | GCUGGUG  |
| ENSG00000053438 | GGUGGUC  |
| ENSG00000053438 | UCCUGU   |
| ENSG00000053702 | UCACAGU  |
| ENSG00000053918 | UGCCUG   |
| ENSG00000054116 | AAAGAGG  |
| ENSG00000054116 | UGUCUUU  |
| ENSG00000054118 | AGCAAAA  |
| ENSG00000054118 | CACCAGC  |
| ENSG00000054118 | CAGCAGG  |
| ENSG00000054118 | GAAAACA  |
| ENSG00000054118 | GAAACAU  |
| ENSG00000054118 | GCUGGUG  |
| ENSG00000054118 | UAUAAAG  |
| ENSG00000054118 | UUGGUCC  |
| ENSG00000054219 | AAUACUG  |



|                 |         |
|-----------------|---------|
| ENSG00000054219 | GAGGUAG |
| ENSG00000054219 | GAGGUAU |
| ENSG00000054219 | UGCAUUG |
| ENSG00000054267 | AAUUAUU |
| ENSG00000054267 | CAAAGUG |
| ENSG00000054267 | CAGUAGU |
| ENSG00000054267 | UCACAAG |
| ENSG00000054267 | UGCCAGC |
| ENSG00000054267 | UGUGCUU |
| ENSG00000054277 | AAAAAUC |
| ENSG00000054356 | AAAAGUA |
| ENSG00000054356 | ACACACU |
| ENSG00000054356 | UCUAGAG |
| ENSG00000054356 | UGCUCAC |
| ENSG00000054523 | AAAUGGU |
| ENSG00000054523 | AAGUCUU |
| ENSG00000054523 | ACUCAA  |
| ENSG00000054523 | AGCAAAA |
| ENSG00000054523 | AUCCCUU |
| ENSG00000054523 | AUGUGCC |
| ENSG00000054523 | AUUGCAC |
| ENSG00000054523 | CAAAGCA |
| ENSG00000054523 | CAGCAGG |
| ENSG00000054523 | CCCUGUC |
| ENSG00000054523 | CCCUGUU |
| ENSG00000054523 | CUAUACA |
| ENSG00000054523 | CUGACUC |
| ENSG00000054523 | GCAGGUU |
| ENSG00000054523 | GGAGAGA |
| ENSG00000054523 | GGCAAGA |
| ENSG00000054523 | GGUUACC |
| ENSG00000054523 | GUCUGCC |
| ENSG00000054523 | GUGCAA  |
| ENSG00000054523 | GUGCCAC |
| ENSG00000054523 | GUUAGGA |
| ENSG00000054523 | UACAAAG |
| ENSG00000054523 | UGCAUUG |
| ENSG00000054523 | UUGGCAA |
| ENSG00000054523 | UUUGCAA |
| ENSG00000054598 | AAAGUAU |
| ENSG00000054598 | UACAGUU |
| ENSG00000054598 | UCCCUUG |
| ENSG00000054598 | UUGGUCC |
| ENSG00000054611 | UUGGCAA |
| ENSG00000054654 | AAGUCUU |
| ENSG00000054654 | AUGCACC |
| ENSG00000054654 | UUGGCAA |
| ENSG00000054654 | UUGGCAC |
| ENSG00000054690 | AGCAGCA |
| ENSG00000054690 | CACAGUG |
| ENSG00000054690 | CAGCAAA |
| ENSG00000054690 | CAGUAGU |
| ENSG00000054690 | CCAGUGU |
| ENSG00000054690 | GAGGUAG |
| ENSG00000054690 | GUCAGUU |
| ENSG00000054793 | AAAAGUA |
| ENSG00000054793 | AAAGAAU |
| ENSG00000054793 | CACAGUG |
| ENSG00000054793 | CAGCAGA |
| ENSG00000054793 | CCUGCUG |
| ENSG00000054793 | GUGUCAC |
| ENSG00000054793 | UCAAGUA |
| ENSG00000054793 | UGAGUCU |
| ENSG00000054793 | UGUGUCA |

|                 |          |
|-----------------|----------|
| ENSG00000054793 | UUGGCAA  |
| ENSG00000054793 | UUGGCAC  |
| ENSG00000054803 | AAGGCAC  |
| ENSG00000054938 | UAAUAUC  |
| ENSG00000054965 | AAAGUGC  |
| ENSG00000054965 | ACUCCAG  |
| ENSG00000054965 | AGCAGCU  |
| ENSG00000054965 | AGUAGUU  |
| ENSG00000054965 | AUAAAGU  |
| ENSG00000054965 | CCAGCAU  |
| ENSG00000054965 | CUCCAGC  |
| ENSG00000054965 | GACCCUG  |
| ENSG00000054965 | GAGGCAG  |
| ENSG00000054965 | UAAGACU  |
| ENSG00000054965 | UACAAAG  |
| ENSG00000054965 | UGCAAAG  |
| ENSG00000054965 | UGCAUAG  |
| ENSG00000054965 | UGCAUUA  |
| ENSG00000054967 | AUGCAUU  |
| ENSG00000054967 | CCAGGAG  |
| ENSG00000054967 | CCCACCG  |
| ENSG00000054967 | CUGCAGC  |
| ENSG00000054967 | GGCAGGG  |
| ENSG00000054967 | GGCUCUG  |
| ENSG00000054967 | GGGCCCC  |
| ENSG00000054967 | UCCCUUU  |
| ENSG00000054967 | UGCAGCU  |
| ENSG00000054983 | AGGUAGU  |
| ENSG00000055070 | AAAUCCC  |
| ENSG00000055070 | AACAAAC  |
| ENSG00000055070 | AAGGCGC  |
| ENSG00000055070 | AAUGUUG  |
| ENSG00000055070 | ACUGGCU  |
| ENSG00000055070 | AGCCCUU  |
| ENSG00000055070 | AGCUGCC  |
| ENSG00000055070 | AGGAGCU  |
| ENSG00000055070 | AGUGCAA  |
| ENSG00000055070 | AUUCAUU  |
| ENSG00000055070 | CAA AUGC |
| ENSG00000055070 | CAGGCUC  |
| ENSG00000055070 | CCCUGAG  |
| ENSG00000055070 | CUGCAGG  |
| ENSG00000055070 | CUGCCCC  |
| ENSG00000055070 | CUGGAAA  |
| ENSG00000055070 | CUUUGGU  |
| ENSG00000055070 | GAAACAU  |
| ENSG00000055070 | GACAACU  |
| ENSG00000055070 | GCAGGUU  |
| ENSG00000055070 | GCUGGUG  |
| ENSG00000055070 | GGCAGUG  |
| ENSG00000055070 | GGCUCAG  |
| ENSG00000055070 | GGCUCUG  |
| ENSG00000055070 | GGGAGC   |
| ENSG00000055070 | GGGUGUU  |
| ENSG00000055070 | GUCUGCC  |
| ENSG00000055070 | GUGGGGA  |
| ENSG00000055070 | GUUAAUG  |
| ENSG00000055070 | UAUAAAG  |
| ENSG00000055070 | UAUUGCU  |
| ENSG00000055070 | UCCCUUU  |
| ENSG00000055070 | UCUGGAA  |
| ENSG00000055070 | UGCAAAG  |
| ENSG00000055070 | UGGGACA  |
| ENSG00000055130 | AUACAAG  |

|                 |         |
|-----------------|---------|
| ENSG00000055130 | CUAUACA |
| ENSG00000055130 | GAAACAU |
| ENSG00000055130 | UCCUGAG |
| ENSG00000055163 | AGCAAAA |
| ENSG00000055163 | AUUCAUU |
| ENSG00000055163 | CAGCUGG |
| ENSG00000055163 | CUGCAGG |
| ENSG00000055163 | GAAACAU |
| ENSG00000055163 | GGGGAGC |
| ENSG00000055163 | UCACAAG |
| ENSG00000055163 | UGCCUG  |
| ENSG00000055163 | UGGAGAU |
| ENSG00000055483 | UGCAGCU |
| ENSG00000055609 | AAACUGU |
| ENSG00000055609 | AAAGUAA |
| ENSG00000055609 | AAAGUGC |
| ENSG00000055609 | AACACUG |
| ENSG00000055609 | AAGUGCU |
| ENSG00000055609 | AAUACUG |
| ENSG00000055609 | ACAUCAC |
| ENSG00000055609 | AGAUAAA |
| ENSG00000055609 | AGCAGCA |
| ENSG00000055609 | AGCAGCU |
| ENSG00000055609 | AGUAACA |
| ENSG00000055609 | AGUGCUG |
| ENSG00000055609 | CAAGAGC |
| ENSG00000055609 | CACAGUG |
| ENSG00000055609 | CAGUCUG |
| ENSG00000055609 | CAUGGAU |
| ENSG00000055609 | CUGACUC |
| ENSG00000055609 | CUGCAGC |
| ENSG00000055609 | CUGCCCC |
| ENSG00000055609 | CUUACAG |
| ENSG00000055609 | GCAGGUU |
| ENSG00000055609 | GCUGGUG |
| ENSG00000055609 | GUCAGUU |
| ENSG00000055609 | UACAAAG |
| ENSG00000055609 | UCAAGUA |
| ENSG00000055609 | UCACAGG |
| ENSG00000055609 | UCAUUCG |
| ENSG00000055609 | UCCUUGC |
| ENSG00000055609 | UUCUGCA |
| ENSG00000055609 | UUGGUCC |
| ENSG00000055609 | UUGGUUC |
| ENSG00000055732 | AAAAAUC |
| ENSG00000055732 | ACUCAGC |
| ENSG00000055813 | ACACACC |
| ENSG00000055813 | ACACACU |
| ENSG00000055813 | ACAGUAC |
| ENSG00000055813 | CAGUGCA |
| ENSG00000055917 | AACUGGU |
| ENSG00000055917 | AAUCACU |
| ENSG00000055917 | AAUUAUU |
| ENSG00000055917 | ACAGUAC |
| ENSG00000055917 | ACAGUAU |
| ENSG00000055917 | AGCCAGU |
| ENSG00000055917 | AUCAUAC |
| ENSG00000055917 | CAAAGCA |
| ENSG00000055917 | CAGUCCA |
| ENSG00000055917 | GGUUUAC |
| ENSG00000055917 | UCCAGAG |
| ENSG00000055955 | GGCCUG  |
| ENSG00000056097 | AAACUGU |
| ENSG00000056097 | AAAGUAA |

|                 |          |
|-----------------|----------|
| ENSG00000056097 | CAA AUGC |
| ENSG00000056277 | AAACUGU  |
| ENSG00000056277 | AAGUUGU  |
| ENSG00000056277 | AAUACUG  |
| ENSG00000056277 | ACUGCAU  |
| ENSG00000056277 | GCACCAU  |
| ENSG00000056277 | GGUGGGC  |
| ENSG00000056277 | GUCCAGA  |
| ENSG00000056277 | UCACAGU  |
| ENSG00000056277 | UGUGCUU  |
| ENSG00000056277 | UGUUGAA  |
| ENSG00000056345 | CUGGCUC  |
| ENSG00000056345 | GAGGUAG  |
| ENSG00000056345 | GAGGUAU  |
| ENSG00000056345 | GCUACAU  |
| ENSG00000056345 | UCACAAG  |
| ENSG00000056487 | AAGACAU  |
| ENSG00000056487 | GAGAAAU  |
| ENSG00000056487 | GGCAAGA  |
| ENSG00000056487 | GUUCAUG  |
| ENSG00000056487 | UAAGACG  |
| ENSG00000056487 | UAAGACU  |
| ENSG00000056487 | UUGGCAA  |
| ENSG00000056487 | UUGUUCG  |
| ENSG00000056487 | UUUUUGC  |
| ENSG00000056558 | AGGCAGG  |
| ENSG00000056558 | CUGGAAA  |
| ENSG00000056558 | UCUGGAA  |
| ENSG00000056558 | UGCCAGC  |
| ENSG00000056661 | AAGGCAC  |
| ENSG00000056661 | ACAUUCA  |
| ENSG00000056661 | CUGGGGG  |
| ENSG00000056661 | GGCAUUG  |
| ENSG00000056661 | UAUAAAG  |
| ENSG00000056661 | UAUUACC  |
| ENSG00000056661 | UCACAGG  |
| ENSG00000056661 | UUCCUAG  |
| ENSG00000056661 | UUGGUUC  |
| ENSG00000056998 | GAGGUAG  |
| ENSG00000057019 | AGCAGCA  |
| ENSG00000057019 | AGUGCAA  |
| ENSG00000057019 | AUACAAG  |
| ENSG00000057019 | CACAGUG  |
| ENSG00000057019 | CUGCAGC  |
| ENSG00000057019 | CUUUGGU  |
| ENSG00000057019 | GAUUGUA  |
| ENSG00000057019 | GAUUGUC  |
| ENSG00000057019 | GGCUCAG  |
| ENSG00000057019 | GUGCAAA  |
| ENSG00000057019 | GUGCUUG  |
| ENSG00000057019 | UAAUACA  |
| ENSG00000057019 | UCAAGUA  |
| ENSG00000057019 | UGAAGUG  |
| ENSG00000057019 | UGCAAAG  |
| ENSG00000057019 | UUUGCAA  |
| ENSG00000057019 | UUUGCAC  |
| ENSG00000057252 | CUUUGGU  |
| ENSG00000057294 | ACAUUCA  |
| ENSG00000057294 | UAAUAUC  |
| ENSG00000057608 | UCCAGAG  |
| ENSG00000057608 | UUGGUCC  |
| ENSG00000057657 | AAAGAAU  |
| ENSG00000057657 | AAAGUAA  |
| ENSG00000057657 | AAUGCCC  |

|                 |         |
|-----------------|---------|
| ENSG00000057657 | ACAUUCA |
| ENSG00000057657 | AGCAAAA |
| ENSG00000057657 | CACUGUU |
| ENSG00000057657 | GAGGUAG |
| ENSG00000057657 | GAGGUAU |
| ENSG00000057657 | GCCUGU  |
| ENSG00000057657 | UACAAAG |
| ENSG00000057657 | UGUUGAA |
| ENSG00000057657 | UUGGCAA |
| ENSG00000057657 | UUUGCAA |
| ENSG00000057704 | AAGGCAC |
| ENSG00000057704 | AUUGCAC |
| ENSG00000057704 | GGCAGUG |
| ENSG00000057704 | UCACAUU |
| ENSG00000057757 | CAAAGCA |
| ENSG00000057757 | UUCUGCA |
| ENSG00000058063 | AGCAGCU |
| ENSG00000058063 | CACAGUG |
| ENSG00000058063 | GCUACAU |
| ENSG00000058063 | GGAGUCC |
| ENSG00000058063 | UUUGCAA |
| ENSG00000058085 | AGCACCA |
| ENSG00000058085 | CUCACAC |
| ENSG00000058085 | GAGAAAU |
| ENSG00000058262 | AAAGAAU |
| ENSG00000058262 | GGAAUGU |
| ENSG00000058262 | GUGACAG |
| ENSG00000058262 | GUGCUUG |
| ENSG00000058262 | UCUGGAG |
| ENSG00000058262 | UGAGAAG |
| ENSG00000058262 | UGUGCUU |
| ENSG00000058262 | UUUUUGC |
| ENSG00000058272 | AGCAGCU |
| ENSG00000058272 | AGUGGUU |
| ENSG00000058272 | AUAAUAC |
| ENSG00000058272 | CAUAUUG |
| ENSG00000058272 | CCAGUGC |
| ENSG00000058272 | CCAGUGU |
| ENSG00000058272 | GCUAGCA |
| ENSG00000058272 | GUGACUG |
| ENSG00000058272 | GUGCAA  |
| ENSG00000058272 | UAAUAUC |
| ENSG00000058272 | UGCAUUA |
| ENSG00000058272 | UUGGCAA |
| ENSG00000058272 | UUGGCAC |
| ENSG00000058404 | CUGCAGC |
| ENSG00000058404 | CUGCAGG |
| ENSG00000058404 | GAGGCAG |
| ENSG00000058453 | AAAGGUA |
| ENSG00000058453 | UACAAAG |
| ENSG00000058668 | AAAGAAU |
| ENSG00000058668 | AACCUGU |
| ENSG00000058668 | AAGGCAC |
| ENSG00000058668 | AAGUCAC |
| ENSG00000058668 | AGCACCA |
| ENSG00000058668 | AGCAGCU |
| ENSG00000058668 | AGUGCUU |
| ENSG00000058668 | AUAAAGU |
| ENSG00000058668 | AUGCACC |
| ENSG00000058668 | AUGGCUU |
| ENSG00000058668 | GAGGUAG |
| ENSG00000058668 | GAGGUAU |
| ENSG00000058668 | GCACCAU |
| ENSG00000058668 | GUGCUUG |

|                 |          |
|-----------------|----------|
| ENSG00000058668 | UAUAAAG  |
| ENSG00000058668 | UCCUGAG  |
| ENSG00000058668 | UGCAUAG  |
| ENSG00000058668 | UGUCUUU  |
| ENSG00000058668 | UUCAAAU  |
| ENSG00000058668 | UUGGCAC  |
| ENSG00000058668 | UUUGCAA  |
| ENSG00000058668 | UUUGCAC  |
| ENSG00000058673 | ACAGGUG  |
| ENSG00000058673 | AGGAGCU  |
| ENSG00000058673 | GAGGUAU  |
| ENSG00000058673 | GCUGUCU  |
| ENSG00000058673 | UCCAGUU  |
| ENSG00000058866 | ACAAUUAU |
| ENSG00000058866 | AUAUAAC  |
| ENSG00000058866 | AUAUUAU  |
| ENSG00000058866 | CAGGUGA  |
| ENSG00000058866 | GAGAACU  |
| ENSG00000058866 | GAGCCCU  |
| ENSG00000058866 | GGAAUGU  |
| ENSG00000058866 | GGGCAG   |
| ENSG00000058866 | UCUCAAG  |
| ENSG00000058866 | UUAGAGA  |
| ENSG00000059378 | CCAGUGU  |
| ENSG00000059378 | GUGACAG  |
| ENSG00000059573 | AAAGUAU  |
| ENSG00000059728 | AAAGUGC  |
| ENSG00000059728 | AAGGCAC  |
| ENSG00000059728 | AAGUCUU  |
| ENSG00000059728 | AAGUUGU  |
| ENSG00000059728 | ACAGUAC  |
| ENSG00000059728 | ACAUUAC  |
| ENSG00000059728 | ACUCAA   |
| ENSG00000059728 | ACUGUUU  |
| ENSG00000059728 | AGCCCUU  |
| ENSG00000059728 | AGCUGCC  |
| ENSG00000059728 | AGUGCAA  |
| ENSG00000059728 | AUAUAAC  |
| ENSG00000059728 | CAAAGUG  |
| ENSG00000059728 | GAGCCCU  |
| ENSG00000059728 | GAGGUAG  |
| ENSG00000059728 | GAGGUAU  |
| ENSG00000059728 | GCCCUUA  |
| ENSG00000059728 | GCUGGUG  |
| ENSG00000059728 | GGGUUUA  |
| ENSG00000059728 | GUGCAA   |
| ENSG00000059728 | UCCCUCU  |
| ENSG00000059728 | UCUGGAA  |
| ENSG00000059728 | UGCAAAG  |
| ENSG00000059728 | UGCUGAC  |
| ENSG00000059728 | UGGAGAU  |
| ENSG00000059728 | UUCUAAU  |
| ENSG00000059728 | UUGACAC  |
| ENSG00000059728 | UUGUGAC  |
| ENSG00000059728 | UUUCAAC  |
| ENSG00000059804 | AAAAAUC  |
| ENSG00000059804 | AAGUGUG  |
| ENSG00000059804 | AAUACUG  |
| ENSG00000059804 | AGCACCA  |
| ENSG00000059804 | AGCAGCG  |
| ENSG00000059804 | AGCAGCU  |
| ENSG00000059804 | AGGGAGG  |
| ENSG00000059804 | CAAAGUG  |
| ENSG00000059804 | CAGUGCA  |

|                 |         |
|-----------------|---------|
| ENSG00000059804 | CAUGGAU |
| ENSG00000059804 | GUGACAG |
| ENSG00000059915 | AAAGUGC |
| ENSG00000059915 | AAGUGCA |
| ENSG00000059915 | AGUGCAA |
| ENSG00000059915 | CCUGUAC |
| ENSG00000059915 | CUGCCCC |
| ENSG00000059915 | GCCCUGU |
| ENSG00000059915 | GUGCAAA |
| ENSG00000059915 | UGCCUG  |
| ENSG00000060069 | AAAAACC |
| ENSG00000060069 | AAAAGUA |
| ENSG00000060069 | ACAUCAC |
| ENSG00000060069 | CUUUGGU |
| ENSG00000060069 | GGUGGGC |
| ENSG00000060069 | UACAAAG |
| ENSG00000060069 | UUGGCAA |
| ENSG00000060069 | UUGGCAC |
| ENSG00000060138 | ACCAGCA |
| ENSG00000060138 | CACCAGC |
| ENSG00000060138 | CCAGCAU |
| ENSG00000060237 | AAAGCGC |
| ENSG00000060237 | AAAGUGC |
| ENSG00000060237 | AACAUUC |
| ENSG00000060237 | AAGGCAC |
| ENSG00000060237 | AAUUUUA |
| ENSG00000060237 | ACUGUUU |
| ENSG00000060237 | CAAACU  |
| ENSG00000060237 | CAAAGCA |
| ENSG00000060237 | CAGUAGA |
| ENSG00000060237 | CAGUAGU |
| ENSG00000060237 | CCAGCAU |
| ENSG00000060237 | GCAGAAG |
| ENSG00000060237 | GCAGCAU |
| ENSG00000060237 | GGGUCC  |
| ENSG00000060237 | GGUUUAC |
| ENSG00000060237 | UAAUACA |
| ENSG00000060237 | UAAUAUC |
| ENSG00000060237 | UAAUGCU |
| ENSG00000060237 | UCAAGUA |
| ENSG00000060237 | UCACAGU |
| ENSG00000060237 | UCAUUCG |
| ENSG00000060237 | UCCUUU  |
| ENSG00000060237 | UGACCUA |
| ENSG00000060339 | UUUGCAA |
| ENSG00000060656 | AAAGCGC |
| ENSG00000060656 | AAGCGCU |
| ENSG00000060656 | CAGUAGA |
| ENSG00000060656 | GAGGCAG |
| ENSG00000060656 | GAGGUAG |
| ENSG00000060656 | GAUUGUC |
| ENSG00000060656 | GGCACGG |
| ENSG00000060656 | UACAGUU |
| ENSG00000060656 | UUCUGCA |
| ENSG00000060656 | UUGAGGC |
| ENSG00000060709 | AAAAACC |
| ENSG00000060709 | AAAAGUA |
| ENSG00000060709 | AAGGCAC |
| ENSG00000060709 | ACACACC |
| ENSG00000060709 | ACAGUAC |
| ENSG00000060709 | AUGGCAC |
| ENSG00000060709 | AUUGCAC |
| ENSG00000060709 | CAGCAGA |
| ENSG00000060709 | CAGUCUG |

|                |         |
|----------------|---------|
| ENSG0000060709 | CGAGGAC |
| ENSG0000060709 | CGAGGAG |
| ENSG0000060709 | CUAGUAG |
| ENSG0000060709 | CUCCAA  |
| ENSG0000060709 | CUCCAC  |
| ENSG0000060709 | GAGCUGC |
| ENSG0000060709 | GCAUCCC |
| ENSG0000060709 | GCUACAU |
| ENSG0000060709 | GGGGGAA |
| ENSG0000060709 | GUGCUUG |
| ENSG0000060709 | GUGGGGA |
| ENSG0000060709 | UCCUGU  |
| ENSG0000060709 | UGAAAGG |
| ENSG0000060709 | UGGACUG |
| ENSG0000060709 | UGGAGAU |
| ENSG0000060709 | UGGGGGA |
| ENSG0000060709 | UGUAUAA |
| ENSG0000060709 | UUCAAGC |
| ENSG0000060709 | UUCUUGU |
| ENSG0000060718 | AUAUUAU |
| ENSG0000060749 | AAGUGCU |
| ENSG0000060749 | AAGUGUG |
| ENSG0000060749 | ACAUUCA |
| ENSG0000060749 | AGUGCAA |
| ENSG0000060749 | AGUGCUG |
| ENSG0000060749 | AGUGCUU |
| ENSG0000060749 | AUAAAGU |
| ENSG0000060749 | AUGCAUU |
| ENSG0000060749 | AUGGCUU |
| ENSG0000060749 | AUUGCAC |
| ENSG0000060749 | CUAGUAG |
| ENSG0000060749 | CUGGACU |
| ENSG0000060749 | GCACCAU |
| ENSG0000060749 | GCUUCCU |
| ENSG0000060749 | GGUGGUC |
| ENSG0000060749 | GGUGGUU |
| ENSG0000060749 | GUCCAGA |
| ENSG0000060749 | UAAUACA |
| ENSG0000060749 | UACAAAG |
| ENSG0000060749 | UAUUGCU |
| ENSG0000060749 | UCCUGAG |
| ENSG0000060749 | UGGCUGC |
| ENSG0000060749 | UGUGCUU |
| ENSG0000060749 | UGUUGAA |
| ENSG0000060749 | UUCUUGU |
| ENSG0000060749 | UUGGCAA |
| ENSG0000060762 | AAGGCAC |
| ENSG0000060762 | UAUUGCU |
| ENSG0000060982 | AAGUGCA |
| ENSG0000060982 | AAGUGCU |
| ENSG0000060982 | AAUCUCA |
| ENSG0000060982 | AAUUAUU |
| ENSG0000060982 | AGAUAAA |
| ENSG0000060982 | AGUGCAA |
| ENSG0000060982 | CACACCG |
| ENSG0000060982 | CACACCU |
| ENSG0000060982 | CAGACAG |
| ENSG0000060982 | GAAUUGU |
| ENSG0000060982 | GAGGUAU |
| ENSG0000060982 | GGAGGCA |
| ENSG0000060982 | GUGAAUG |
| ENSG0000060982 | GUGCCAC |
| ENSG0000060982 | GUGCUUG |
| ENSG0000060982 | UAUAAUA |



|                |         |
|----------------|---------|
| ENSG0000060982 | UCACACA |
| ENSG0000060982 | UCCCUUU |
| ENSG0000060982 | UGCAGCU |
| ENSG0000060982 | UGCUGAC |
| ENSG0000060982 | UGUUGAA |
| ENSG0000060982 | UUGAUCA |
| ENSG0000061273 | AGUGGUU |
| ENSG0000061273 | AUGUGGG |
| ENSG0000061273 | CCUUCUU |
| ENSG0000061273 | CUCCAC  |
| ENSG0000061273 | GAGAUGA |
| ENSG0000061273 | GCACCAU |
| ENSG0000061273 | GUGCAA  |
| ENSG0000061273 | UACAAAG |
| ENSG0000061273 | UCACAUU |
| ENSG0000061273 | UCCAGAG |
| ENSG0000061273 | UCCUGAG |
| ENSG0000061273 | UGCAAAG |
| ENSG0000061273 | UUGGCAC |
| ENSG0000061337 | AAGGCAC |
| ENSG0000061337 | AGCAGCU |
| ENSG0000061337 | AGGGAGG |
| ENSG0000061337 | AUUCAUU |
| ENSG0000061337 | GAGAAAU |
| ENSG0000061337 | GGCAUUG |
| ENSG0000061676 | AAUGCCC |
| ENSG0000061676 | UAUAUGA |
| ENSG0000061936 | GAAACAU |
| ENSG0000061936 | GCUGGUG |
| ENSG0000061936 | UCACAGG |
| ENSG0000061936 | UCACAGU |
| ENSG0000061938 | CUCUGGG |
| ENSG0000061938 | CUGGAAA |
| ENSG0000061938 | CUGGCUC |
| ENSG0000061938 | GGAAGAC |
| ENSG0000061938 | GGCCUG  |
| ENSG0000061938 | UCUGGAA |
| ENSG0000061987 | AAAAGUA |
| ENSG0000061987 | AACAUUC |
| ENSG0000061987 | AAGUCUU |
| ENSG0000061987 | ACAGUAU |
| ENSG0000061987 | ACAUCAC |
| ENSG0000061987 | AGCUGCC |
| ENSG0000061987 | CAAGAGC |
| ENSG0000061987 | CUGACUC |
| ENSG0000061987 | GAGGUAG |
| ENSG0000061987 | GAGGUAU |
| ENSG0000061987 | GCUACAU |
| ENSG0000061987 | GGCAGUG |
| ENSG0000061987 | GGUUACC |
| ENSG0000061987 | UACAGUU |
| ENSG0000061987 | UCACAGG |
| ENSG0000061987 | UCACAUU |
| ENSG0000061987 | UCCCUUG |
| ENSG0000061987 | UCUCAAG |
| ENSG0000061987 | UGCAUAU |
| ENSG0000062038 | GAUUGUC |
| ENSG0000062194 | AAAGCUG |
| ENSG0000062194 | UCACAUU |
| ENSG0000062282 | AACAUUC |
| ENSG0000062282 | AAGGCAC |
| ENSG0000062282 | AGCAUUC |
| ENSG0000062282 | CACCACC |
| ENSG0000062282 | GGUUUAC |

|                |         |
|----------------|---------|
| ENSG0000062282 | UAUAAUA |
| ENSG0000062485 | AAAAACC |
| ENSG0000062485 | AGCAUUC |
| ENSG0000062485 | AGUGCCU |
| ENSG0000062485 | CAGUGCA |
| ENSG0000062485 | CAGUUAC |
| ENSG0000062485 | GGAGUGU |
| ENSG0000062485 | GGGUUUA |
| ENSG0000062485 | GGUUUAC |
| ENSG0000062485 | GUUAAUG |
| ENSG0000062485 | UCAACAG |
| ENSG0000062485 | UCUAGAG |
| ENSG0000062485 | UGCAUUG |
| ENSG0000062485 | UUUGCAA |
| ENSG0000062485 | UUUGCAC |
| ENSG0000062524 | ACUGCAG |
| ENSG0000062598 | AAGGCAC |
| ENSG0000062598 | AGCACCA |
| ENSG0000062598 | AGCAGCA |
| ENSG0000062598 | AUAUAAC |
| ENSG0000062598 | CUGGCUC |
| ENSG0000062598 | GAAGGAA |
| ENSG0000062598 | GAGCCCU |
| ENSG0000062598 | GAGUAUU |
| ENSG0000062598 | GGCAUUG |
| ENSG0000062598 | GGGCCCC |
| ENSG0000062598 | UGGCCAC |
| ENSG0000062598 | UGUAUAA |
| ENSG0000062650 | AAAGUAC |
| ENSG0000062650 | AAGACAU |
| ENSG0000062650 | ACUGUAG |
| ENSG0000062650 | AGCAGCA |
| ENSG0000062650 | AUGGCUU |
| ENSG0000062650 | CAGCUGG |
| ENSG0000062650 | CCAGUGU |
| ENSG0000062650 | CGUUGGC |
| ENSG0000062650 | CUCCAGC |
| ENSG0000062650 | CUUUGGU |
| ENSG0000062650 | GGAAGAC |
| ENSG0000062650 | UACAAAG |
| ENSG0000062650 | UCAAGUA |
| ENSG0000062650 | UUCUAAU |
| ENSG0000062716 | AAAUGGU |
| ENSG0000062716 | ACAUCAC |
| ENSG0000062716 | GGAAUGU |
| ENSG0000062716 | UCAUUCG |
| ENSG0000062725 | AACACUG |
| ENSG0000062725 | CACAGUG |
| ENSG0000062725 | CAGGAAC |
| ENSG0000062725 | CCAGUGU |
| ENSG0000062725 | GCACCAU |
| ENSG0000062725 | GCUACAU |
| ENSG0000062725 | UCACAGG |
| ENSG0000062725 | UCCAGUU |
| ENSG0000062725 | UCUAGAG |
| ENSG0000062725 | UUGGAGG |
| ENSG0000063015 | CAAAGUG |
| ENSG0000063015 | CUCUGGG |
| ENSG0000063015 | CUGGCUC |
| ENSG0000063015 | CUUUGGU |
| ENSG0000063015 | UACAAAG |
| ENSG0000063015 | UCUUGAG |
| ENSG0000063046 | AAGUGCU |
| ENSG0000063046 | AAUUUUA |

|                |         |
|----------------|---------|
| ENSG0000063046 | AGCAGCA |
| ENSG0000063046 | AGUGCUU |
| ENSG0000063046 | CUACAGU |
| ENSG0000063046 | CUAGGCU |
| ENSG0000063046 | CUCCAGC |
| ENSG0000063046 | CUCCAC  |
| ENSG0000063046 | CUCUGGG |
| ENSG0000063046 | CUGGCUC |
| ENSG0000063046 | GCAGCAU |
| ENSG0000063046 | GGAUUUU |
| ENSG0000063046 | GUCUUGC |
| ENSG0000063046 | UACAAAG |
| ENSG0000063046 | UCAUUUG |
| ENSG0000063046 | UCCAGUU |
| ENSG0000063046 | UCUCAA  |
| ENSG0000063046 | UGGAGAU |
| ENSG0000063046 | UGUCUGC |
| ENSG0000063046 | UUGGAGG |
| ENSG0000063169 | GGAAGAC |
| ENSG0000063169 | GGAGGCA |
| ENSG0000063169 | GGCAAGA |
| ENSG0000063169 | UUCAAAU |
| ENSG0000063176 | AAUUGCU |
| ENSG0000063176 | AUUGCAC |
| ENSG0000063176 | GGAAUGU |
| ENSG0000063176 | GGAGGCA |
| ENSG0000063176 | GUGCAA  |
| ENSG0000063176 | UAUUGCU |
| ENSG0000063176 | UGCAUUA |
| ENSG0000063176 | UUUCAAC |
| ENSG0000063241 | UGGGAUC |
| ENSG0000063244 | AAUUGCU |
| ENSG0000063244 | AGCAAAA |
| ENSG0000063244 | CACUCCU |
| ENSG0000063244 | CCCCAG  |
| ENSG0000063244 | GUCACUC |
| ENSG0000063244 | UCCUCU  |
| ENSG0000063244 | UGGCCAC |
| ENSG0000063245 | GUAGUGU |
| ENSG0000063322 | AAAAAUC |
| ENSG0000063322 | AUUGCAC |
| ENSG0000063322 | CCGGAGC |
| ENSG0000063322 | CCUGCUG |
| ENSG0000063322 | CUGCCC  |
| ENSG0000063322 | CUUGGGC |
| ENSG0000063322 | GCCUGGG |
| ENSG0000063322 | GCUUCCU |
| ENSG0000063322 | GGGGAGC |
| ENSG0000063322 | GGGGCAG |
| ENSG0000063322 | GGGUCC  |
| ENSG0000063322 | GGGUGGU |
| ENSG0000063322 | GUGGGGA |
| ENSG0000063322 | UCACACA |
| ENSG0000063322 | UCAUUCG |
| ENSG0000063322 | UCCUUGC |
| ENSG0000063438 | CCCUGAG |
| ENSG0000063587 | AAUUGCU |
| ENSG0000063587 | AUAAAGU |
| ENSG0000063587 | AUGGCUU |
| ENSG0000063587 | CAAAGCA |
| ENSG0000063587 | CUCCAGC |
| ENSG0000063587 | GAGAUGA |
| ENSG0000063587 | GAGGUAU |
| ENSG0000063587 | GGCAGUG |

|                |          |
|----------------|----------|
| ENSG0000063587 | GUUCAUG  |
| ENSG0000063587 | UAAUAUC  |
| ENSG0000063601 | AAUUGCU  |
| ENSG0000063601 | UCAAGUA  |
| ENSG0000063660 | ACAAGGU  |
| ENSG0000063660 | AGCCCUU  |
| ENSG0000063660 | AUACAAG  |
| ENSG0000063660 | UUGGCAC  |
| ENSG0000063978 | AAAGUGC  |
| ENSG0000063978 | AAGGUGC  |
| ENSG0000063978 | CACCACC  |
| ENSG0000063978 | CACUCCU  |
| ENSG0000063978 | CCUUCAU  |
| ENSG0000063978 | GAGGCAG  |
| ENSG0000063978 | GGAGUCC  |
| ENSG0000063978 | UCCUGAG  |
| ENSG0000063978 | UUCAAAU  |
| ENSG0000064042 | AAAGGUA  |
| ENSG0000064042 | ACAUUCA  |
| ENSG0000064042 | ACUGCAU  |
| ENSG0000064042 | AUCAUAC  |
| ENSG0000064042 | CAAAGUG  |
| ENSG0000064042 | UAUAAAAG |
| ENSG0000064042 | UGUAUAA  |
| ENSG0000064042 | UUCUAAU  |
| ENSG0000064102 | AAAAAUC  |
| ENSG0000064115 | AAAGGUA  |
| ENSG0000064195 | AAGUUGU  |
| ENSG0000064195 | AAUGCCC  |
| ENSG0000064195 | AUAAAAGU |
| ENSG0000064195 | AUAUAAC  |
| ENSG0000064195 | CCAGGAG  |
| ENSG0000064195 | CCAGUAC  |
| ENSG0000064195 | CUUCUCU  |
| ENSG0000064195 | GCCCUUA  |
| ENSG0000064195 | GUCUUGC  |
| ENSG0000064195 | GUGCAA   |
| ENSG0000064195 | UCUGGAG  |
| ENSG0000064195 | UGAGAAG  |
| ENSG0000064195 | UGCAAAG  |
| ENSG0000064195 | UUGGUUC  |
| ENSG0000064218 | UCCUGAG  |
| ENSG0000064225 | AAAACUG  |
| ENSG0000064225 | UCACAGG  |
| ENSG0000064225 | UCACAGU  |
| ENSG0000064300 | AUGUGGG  |
| ENSG0000064300 | GGAAUGU  |
| ENSG0000064300 | GGCUCUG  |
| ENSG0000064300 | UCACAGG  |
| ENSG0000064300 | UGAGUCU  |
| ENSG0000064309 | AAAGGUA  |
| ENSG0000064309 | AACACUG  |
| ENSG0000064309 | AAUACUG  |
| ENSG0000064309 | ACAUCAC  |
| ENSG0000064309 | AUAAAAGU |
| ENSG0000064309 | AUAUAAC  |
| ENSG0000064309 | AUGACAC  |
| ENSG0000064309 | CACAAUG  |
| ENSG0000064309 | CAGUCCA  |
| ENSG0000064309 | CAGUGCA  |
| ENSG0000064309 | CAGUUAC  |
| ENSG0000064309 | CUCUUCC  |
| ENSG0000064309 | GAGAACU  |
| ENSG0000064309 | GCUACAU  |

|                 |         |
|-----------------|---------|
| ENSG00000064309 | GGAAUGU |
| ENSG00000064309 | GUGACAG |
| ENSG00000064309 | UAAUAUC |
| ENSG00000064309 | UCUGGAA |
| ENSG00000064309 | UGACCUA |
| ENSG00000064309 | UGCAUAG |
| ENSG00000064313 | ACCACAG |
| ENSG00000064393 | AAAAGUA |
| ENSG00000064393 | AAAGCUG |
| ENSG00000064393 | AAAGUAC |
| ENSG00000064393 | AAAUUUC |
| ENSG00000064393 | AACACUG |
| ENSG00000064393 | AAGGCAC |
| ENSG00000064393 | AAGUGUG |
| ENSG00000064393 | AAUACUG |
| ENSG00000064393 | AAUGCCC |
| ENSG00000064393 | AAUUAUU |
| ENSG00000064393 | ACAGUAC |
| ENSG00000064393 | ACAUUCA |
| ENSG00000064393 | ACGUCAU |
| ENSG00000064393 | ACUGUUU |
| ENSG00000064393 | AGAUAAA |
| ENSG00000064393 | AGCAGCG |
| ENSG00000064393 | AGCAGCU |
| ENSG00000064393 | AGCAUUC |
| ENSG00000064393 | AGCCAGU |
| ENSG00000064393 | AGCCCUU |
| ENSG00000064393 | AGGUUAU |
| ENSG00000064393 | AUAAAGU |
| ENSG00000064393 | AUAAUAC |
| ENSG00000064393 | AUACAAG |
| ENSG00000064393 | AUACCUC |
| ENSG00000064393 | AUGAGCU |
| ENSG00000064393 | AUGAUGA |
| ENSG00000064393 | AUGGAUU |
| ENSG00000064393 | AUGUAAU |
| ENSG00000064393 | AUUCAUU |
| ENSG00000064393 | CACAGUG |
| ENSG00000064393 | CACCACC |
| ENSG00000064393 | CACUCCU |
| ENSG00000064393 | CAGUAGA |
| ENSG00000064393 | CAGUUAC |
| ENSG00000064393 | CAUGGAU |
| ENSG00000064393 | CCAGUGC |
| ENSG00000064393 | CCAGUGU |
| ENSG00000064393 | CCCUGUU |
| ENSG00000064393 | CUACAGU |
| ENSG00000064393 | CUAUACA |
| ENSG00000064393 | CUCCAUU |
| ENSG00000064393 | CUUGGAG |
| ENSG00000064393 | CUUGUAU |
| ENSG00000064393 | CUUGUGU |
| ENSG00000064393 | CUUUGGU |
| ENSG00000064393 | GAAGGAA |
| ENSG00000064393 | GAGCUAA |
| ENSG00000064393 | GAGCUGC |
| ENSG00000064393 | GAGGUAG |
| ENSG00000064393 | GAGGUAU |
| ENSG00000064393 | GCAGCAU |
| ENSG00000064393 | GCCCUGU |
| ENSG00000064393 | GCUACAU |
| ENSG00000064393 | GCUUCCU |
| ENSG00000064393 | GGAAGAC |
| ENSG00000064393 | GGAAUGU |

|                 |          |
|-----------------|----------|
| ENSG00000064393 | GGUUGUC  |
| ENSG00000064393 | GGUUUAC  |
| ENSG00000064393 | GUCAGUU  |
| ENSG00000064393 | GUGCAA   |
| ENSG00000064393 | UACAAAG  |
| ENSG00000064393 | UAUAAAAG |
| ENSG00000064393 | UAUAAUA  |
| ENSG00000064393 | UAUUACC  |
| ENSG00000064393 | UAUUGCU  |
| ENSG00000064393 | UCAAGUA  |
| ENSG00000064393 | UCACAGG  |
| ENSG00000064393 | UCACAUU  |
| ENSG00000064393 | UCAUGAU  |
| ENSG00000064393 | UCCUGU   |
| ENSG00000064393 | UCCUGAG  |
| ENSG00000064393 | UCUAGAG  |
| ENSG00000064393 | UGAGGAC  |
| ENSG00000064393 | UGCAUUA  |
| ENSG00000064393 | UGCCUG   |
| ENSG00000064393 | UUGAGGC  |
| ENSG00000064393 | UUGGUUC  |
| ENSG00000064393 | UUGUGUC  |
| ENSG00000064419 | AAGACAU  |
| ENSG00000064419 | CACAGUG  |
| ENSG00000064419 | CAGGAAC  |
| ENSG00000064419 | CUCCAC   |
| ENSG00000064419 | GAUUGUA  |
| ENSG00000064419 | GAUUGUC  |
| ENSG00000064419 | UCCACC   |
| ENSG00000064419 | UGGGACA  |
| ENSG00000064419 | UUCUAAU  |
| ENSG00000064490 | UUGGUUC  |
| ENSG00000064547 | CACAGGG  |
| ENSG00000064547 | GAGAUGA  |
| ENSG00000064601 | AAGUGCU  |
| ENSG00000064601 | AUAAAGU  |
| ENSG00000064601 | UCCUGAG  |
| ENSG00000064601 | UCCAUA   |
| ENSG00000064651 | AAGGCAC  |
| ENSG00000064651 | AAGUAGC  |
| ENSG00000064651 | AAUCCUU  |
| ENSG00000064651 | AGCAGCG  |
| ENSG00000064651 | AGCAGCU  |
| ENSG00000064651 | AUCCUU   |
| ENSG00000064651 | AUUGCAC  |
| ENSG00000064651 | CAAAGCA  |
| ENSG00000064651 | GGAAGAC  |
| ENSG00000064651 | GGCAGUG  |
| ENSG00000064651 | GUGCUUG  |
| ENSG00000064651 | UACAAAG  |
| ENSG00000064651 | UCACAGG  |
| ENSG00000064651 | UCACAGU  |
| ENSG00000064651 | UCCUUG   |
| ENSG00000064651 | UGUGCUU  |
| ENSG00000064652 | AGCACCA  |
| ENSG00000064652 | UGAAAUG  |
| ENSG00000064652 | UGCCUG   |
| ENSG00000064655 | AAGGCAC  |
| ENSG00000064655 | AUGCCUU  |
| ENSG00000064655 | GAUUGUA  |
| ENSG00000064655 | GUAAACA  |
| ENSG00000064726 | CAAUAGC  |
| ENSG00000064787 | AUAAUAC  |
| ENSG00000064787 | UAAUACA  |

|                 |         |
|-----------------|---------|
| ENSG00000064961 | AAGGUGC |
| ENSG00000064989 | AAUCCUU |
| ENSG00000064989 | UAUCAGA |
| ENSG00000064995 | GCAACUU |
| ENSG00000064999 | AACAAAC |
| ENSG00000064999 | AACAUUC |
| ENSG00000064999 | AAUGCCC |
| ENSG00000064999 | ACAGUAC |
| ENSG00000064999 | ACAGUAU |
| ENSG00000064999 | AGCAGCG |
| ENSG00000064999 | CACAGUG |
| ENSG00000064999 | CCUUCAU |
| ENSG00000064999 | GAUUGGU |
| ENSG00000064999 | GGGUCUU |
| ENSG00000064999 | GUAGUGU |
| ENSG00000064999 | UCACAGG |
| ENSG00000064999 | UCACAGU |
| ENSG00000065000 | AAAGUGC |
| ENSG00000065000 | AAUCACU |
| ENSG00000065000 | AGCAAAA |
| ENSG00000065000 | GGAAUGU |
| ENSG00000065029 | CCCUGAG |
| ENSG00000065029 | UAUUGCU |
| ENSG00000065054 | CAGCAGG |
| ENSG00000065054 | GAAACAU |
| ENSG00000065060 | AAUACUG |
| ENSG00000065060 | ACAUUCA |
| ENSG00000065060 | CCAGUAC |
| ENSG00000065060 | CUCUGGG |
| ENSG00000065060 | CUUUGGU |
| ENSG00000065060 | GAGGUAU |
| ENSG00000065060 | GGUGGUU |
| ENSG00000065060 | GUAAACA |
| ENSG00000065060 | UCACAGU |
| ENSG00000065060 | UGAAAUG |
| ENSG00000065060 | UUCAAGC |
| ENSG00000065060 | UUCUCUG |
| ENSG00000065060 | UUGGCAC |
| ENSG00000065135 | AAGGCAC |
| ENSG00000065135 | AAUACUG |
| ENSG00000065135 | ACAGUAC |
| ENSG00000065135 | CAGACAG |
| ENSG00000065135 | GAAAACA |
| ENSG00000065135 | GACCAUG |
| ENSG00000065135 | GCAGCAU |
| ENSG00000065135 | GGUGGUC |
| ENSG00000065135 | GUUCAUG |
| ENSG00000065135 | UGCAUAG |
| ENSG00000065135 | UGUGCUU |
| ENSG00000065135 | UUGGCAA |
| ENSG00000065135 | UUGGCAC |
| ENSG00000065150 | AACAUUC |
| ENSG00000065150 | AAGAACC |
| ENSG00000065150 | ACACACC |
| ENSG00000065150 | ACAGUAC |
| ENSG00000065150 | ACAUUCA |
| ENSG00000065150 | AGUACUG |
| ENSG00000065150 | AUGCAUU |
| ENSG00000065150 | AUGUCUG |
| ENSG00000065150 | AUUCAUU |
| ENSG00000065150 | CAGACAG |
| ENSG00000065150 | CAGUGCA |
| ENSG00000065150 | GGAAGCC |
| ENSG00000065150 | UCACAUU |

|                |         |
|----------------|---------|
| ENSG0000065150 | UCAUUUG |
| ENSG0000065150 | UCCCUUG |
| ENSG0000065150 | UCCCUUU |
| ENSG0000065150 | UGACAUC |
| ENSG0000065150 | UGAGGAC |
| ENSG0000065150 | UGCUCAC |
| ENSG0000065150 | UGUGUGG |
| ENSG0000065150 | UUGGAGG |
| ENSG0000065243 | AAACUGU |
| ENSG0000065243 | AAAGUGC |
| ENSG0000065243 | AAGUGCU |
| ENSG0000065243 | AAUUAUU |
| ENSG0000065243 | ACAUUCA |
| ENSG0000065243 | AGUGAUC |
| ENSG0000065243 | AGUGCUG |
| ENSG0000065243 | CAAAGUG |
| ENSG0000065243 | CAAAGUC |
| ENSG0000065243 | CAGCAGA |
| ENSG0000065243 | CCAGUGU |
| ENSG0000065243 | GAGGUAG |
| ENSG0000065243 | GGCAAGA |
| ENSG0000065243 | UAGACUG |
| ENSG0000065243 | UAGUGAG |
| ENSG0000065243 | UAUUGCU |
| ENSG0000065243 | UCACAGG |
| ENSG0000065243 | UCACAGU |
| ENSG0000065243 | UCCAGUU |
| ENSG0000065243 | UCCUGAG |
| ENSG0000065243 | UGCAUAG |
| ENSG0000065243 | UGGCCAC |
| ENSG0000065243 | UGUCUGC |
| ENSG0000065243 | UUCUUGU |
| ENSG0000065243 | UUGAGGC |
| ENSG0000065243 | UUGGCAA |
| ENSG0000065243 | UUGGCAC |
| ENSG0000065308 | AAAAGUA |
| ENSG0000065308 | ACCAGCA |
| ENSG0000065308 | AGCACCA |
| ENSG0000065308 | AUUGCAC |
| ENSG0000065308 | CAAAACU |
| ENSG0000065308 | CACCAGC |
| ENSG0000065308 | CCUUCAU |
| ENSG0000065308 | CCUUCUG |
| ENSG0000065308 | GAGAUGA |
| ENSG0000065308 | GGAGGAG |
| ENSG0000065308 | GUAAACA |
| ENSG0000065308 | UAAUAGU |
| ENSG0000065308 | UAUUGCU |
| ENSG0000065308 | UCCCUUU |
| ENSG0000065308 | UGAAAUG |
| ENSG0000065308 | UGAGAAG |
| ENSG0000065308 | UGCAUUG |
| ENSG0000065308 | UGCUCAC |
| ENSG0000065308 | UUGGCAC |
| ENSG0000065308 | UUGGUUC |
| ENSG0000065320 | AAAGUGC |
| ENSG0000065320 | ACCCGGC |
| ENSG0000065320 | AGUGCCU |
| ENSG0000065320 | AUAAUAC |
| ENSG0000065320 | AUAUAAC |
| ENSG0000065320 | AUAUUAU |
| ENSG0000065320 | AUUCAUU |
| ENSG0000065320 | CCAGCAU |
| ENSG0000065320 | CCCCUGG |



|                |          |
|----------------|----------|
| ENSG0000065320 | CUCAGGG  |
| ENSG0000065320 | CUGGAAA  |
| ENSG0000065320 | CUGUUGA  |
| ENSG0000065320 | GAGGUAG  |
| ENSG0000065320 | GGGAGCU  |
| ENSG0000065320 | GGGCCCC  |
| ENSG0000065320 | GGUGGUU  |
| ENSG0000065320 | GUCACUC  |
| ENSG0000065320 | GUCAUUG  |
| ENSG0000065320 | GUGCCUG  |
| ENSG0000065320 | GUGUCAC  |
| ENSG0000065320 | UAAUACA  |
| ENSG0000065320 | UCACAGU  |
| ENSG0000065320 | UGCAUUG  |
| ENSG0000065357 | AAUACUG  |
| ENSG0000065357 | GAAGGAA  |
| ENSG0000065357 | GAGGCAG  |
| ENSG0000065357 | GGCAGCG  |
| ENSG0000065361 | GAGAUGA  |
| ENSG0000065361 | GUGCAAA  |
| ENSG0000065361 | UCCAGUU  |
| ENSG0000065413 | UUCAAAU  |
| ENSG0000065413 | UUCUAAU  |
| ENSG0000065485 | GAGGCAG  |
| ENSG0000065485 | UCACAGG  |
| ENSG0000065491 | AAAAACC  |
| ENSG0000065491 | AAAGAGG  |
| ENSG0000065491 | AAUACUG  |
| ENSG0000065491 | ACCAUUG  |
| ENSG0000065491 | AGCCCUU  |
| ENSG0000065491 | AGUGAUC  |
| ENSG0000065491 | AGUGGUU  |
| ENSG0000065491 | CACAGUG  |
| ENSG0000065491 | CUACAAA  |
| ENSG0000065491 | GAGAAAU  |
| ENSG0000065491 | GAGAAGA  |
| ENSG0000065491 | GAUCAGA  |
| ENSG0000065491 | GCCUGAU  |
| ENSG0000065491 | GCUACAU  |
| ENSG0000065491 | GGAGGAG  |
| ENSG0000065491 | GGCUCAG  |
| ENSG0000065491 | GGGAACG  |
| ENSG0000065491 | UAAGACG  |
| ENSG0000065491 | UAAGACU  |
| ENSG0000065491 | UACAAAG  |
| ENSG0000065491 | UAUAAAAG |
| ENSG0000065491 | UGUCUUU  |
| ENSG0000065491 | UUGGCAC  |
| ENSG0000065526 | AAAACUG  |
| ENSG0000065526 | ACACACU  |
| ENSG0000065526 | AGCAGCA  |
| ENSG0000065526 | CAAAACU  |
| ENSG0000065526 | GUGCAAA  |
| ENSG0000065526 | UACAAAG  |
| ENSG0000065526 | UGCAAAG  |
| ENSG0000065526 | UUGGCAA  |
| ENSG0000065534 | AAGUGCA  |
| ENSG0000065534 | AAGUGCU  |
| ENSG0000065559 | AAAAACC  |
| ENSG0000065559 | AAAGAGC  |
| ENSG0000065559 | AAUGUUG  |
| ENSG0000065559 | AAUUGCU  |
| ENSG0000065559 | ACCAGCA  |
| ENSG0000065559 | AGCACCA  |

|                 |          |
|-----------------|----------|
| ENSG00000065559 | AGCAGCA  |
| ENSG00000065559 | AGCAGCG  |
| ENSG00000065559 | AGCAGCU  |
| ENSG00000065559 | AGCCCUU  |
| ENSG00000065559 | AGCUGCC  |
| ENSG00000065559 | AUAAUAC  |
| ENSG00000065559 | AUCCCUU  |
| ENSG00000065559 | AUGGCUU  |
| ENSG00000065559 | CCAGUAC  |
| ENSG00000065559 | CCAGUGU  |
| ENSG00000065559 | CCCUGUU  |
| ENSG00000065559 | CUAUACA  |
| ENSG00000065559 | CUGCAGG  |
| ENSG00000065559 | CUGGGCA  |
| ENSG00000065559 | CUUACAG  |
| ENSG00000065559 | CUUCUCU  |
| ENSG00000065559 | GACCUGG  |
| ENSG00000065559 | GGAUGAG  |
| ENSG00000065559 | GGCAGCG  |
| ENSG00000065559 | GUCAACA  |
| ENSG00000065559 | UACAGUU  |
| ENSG00000065559 | UAUUACC  |
| ENSG00000065559 | UAUUGCU  |
| ENSG00000065559 | UCACAGG  |
| ENSG00000065559 | UCCUUGC  |
| ENSG00000065559 | UGCCUG   |
| ENSG00000065559 | UGUCUGG  |
| ENSG00000065559 | UUCUAAU  |
| ENSG00000065609 | AACACUG  |
| ENSG00000065609 | AAUGUUG  |
| ENSG00000065609 | AGCUGCC  |
| ENSG00000065609 | AUUGCAC  |
| ENSG00000065609 | UAUUGCU  |
| ENSG00000065609 | UCAACAG  |
| ENSG00000065609 | UGAAAUG  |
| ENSG00000065609 | UGUAUGU  |
| ENSG00000065618 | UUCCUAG  |
| ENSG00000065675 | UAGUGAG  |
| ENSG00000065675 | UCUCAAG  |
| ENSG00000065802 | CAGUCCA  |
| ENSG00000065802 | GUGAAUG  |
| ENSG00000065802 | UUGGUCC  |
| ENSG00000065809 | ACUCAA   |
| ENSG00000065809 | AGCUUUAU |
| ENSG00000065809 | AUAAAAGU |
| ENSG00000065809 | CCAGUGC  |
| ENSG00000065809 | CUGCUCA  |
| ENSG00000065809 | GAAAACA  |
| ENSG00000065809 | GGAAGAC  |
| ENSG00000065809 | GGCUCAG  |
| ENSG00000065809 | GUCUCUG  |
| ENSG00000065809 | UCACAAG  |
| ENSG00000065809 | UCCAGUU  |
| ENSG00000065809 | UCCCUUU  |
| ENSG00000065809 | UCCUGAG  |
| ENSG00000065833 | UGCAUUAU |
| ENSG00000065833 | UUUGCAA  |
| ENSG00000065833 | UUUGCAC  |
| ENSG00000065882 | AAGGCAC  |
| ENSG00000065882 | AGCAAAA  |
| ENSG00000065882 | CUUCUCU  |
| ENSG00000065882 | GAGAAGA  |
| ENSG00000065882 | GCCUGGA  |
| ENSG00000065882 | UGAGAAG  |

|                 |          |
|-----------------|----------|
| ENSG00000065883 | AAAAAUC  |
| ENSG00000065883 | AAAGUAC  |
| ENSG00000065883 | AGAUAAA  |
| ENSG00000065883 | AUGUGCC  |
| ENSG00000065883 | UACAAAG  |
| ENSG00000065883 | UCAAGUA  |
| ENSG00000065883 | UGAAAUG  |
| ENSG00000065883 | UGCAUAG  |
| ENSG00000065883 | UUGGUCC  |
| ENSG00000065911 | AGCUGCC  |
| ENSG00000065911 | GUGAGGU  |
| ENSG00000065911 | UGCAUUG  |
| ENSG00000065911 | UUGGUUC  |
| ENSG00000065970 | AAAAGUA  |
| ENSG00000065970 | AACAUUC  |
| ENSG00000065970 | AAGUGCU  |
| ENSG00000065970 | ACAUCAC  |
| ENSG00000065970 | AUAAAGU  |
| ENSG00000065970 | CAAAGCA  |
| ENSG00000065970 | CACCACC  |
| ENSG00000065970 | CUUCUCU  |
| ENSG00000065970 | GAAACAU  |
| ENSG00000065970 | GAGACCU  |
| ENSG00000065970 | GCAGCAU  |
| ENSG00000065970 | UCACCAC  |
| ENSG00000065970 | UGAGAAU  |
| ENSG00000065970 | UGCAAAG  |
| ENSG00000065978 | GAGAAAU  |
| ENSG00000065978 | UGAGAAG  |
| ENSG00000065978 | UGAGAAU  |
| ENSG00000065989 | AAGGCAC  |
| ENSG00000065989 | ACAGUAC  |
| ENSG00000065989 | ACCCUGU  |
| ENSG00000065989 | AUCCCUU  |
| ENSG00000065989 | AUGGCUU  |
| ENSG00000065989 | CCCACCU  |
| ENSG00000065989 | GCUUCCU  |
| ENSG00000065989 | UAAUACA  |
| ENSG00000065989 | UAUAAUA  |
| ENSG00000065989 | UAUUGCU  |
| ENSG00000065989 | UCCCUUG  |
| ENSG00000066027 | UACAAAG  |
| ENSG00000066027 | UCAAGUA  |
| ENSG00000066032 | AUACAAG  |
| ENSG00000066032 | UGUGCUU  |
| ENSG00000066032 | UUUUUGC  |
| ENSG00000066044 | AAAAGUA  |
| ENSG00000066044 | AAAGGUA  |
| ENSG00000066044 | AAAGUAA  |
| ENSG00000066044 | AACAUUC  |
| ENSG00000066044 | AACUGGU  |
| ENSG00000066044 | ACUCAGC  |
| ENSG00000066044 | ACUGUAG  |
| ENSG00000066044 | AUACAAG  |
| ENSG00000066044 | AUUCAUU  |
| ENSG00000066044 | CAA AUGC |
| ENSG00000066044 | CACAAUG  |
| ENSG00000066044 | CCCUGAG  |
| ENSG00000066044 | CUACAAA  |
| ENSG00000066044 | GAGUGUG  |
| ENSG00000066044 | GAGUUGA  |
| ENSG00000066044 | GAGUUGG  |
| ENSG00000066044 | GGCAAGA  |
| ENSG00000066044 | GGUCUAG  |

|                |         |
|----------------|---------|
| ENSG0000066044 | GUCAACA |
| ENSG0000066044 | GUGCAAA |
| ENSG0000066044 | GUUCAUG |
| ENSG0000066044 | UAAUAGU |
| ENSG0000066044 | UCAUUCG |
| ENSG0000066044 | UCCAGAG |
| ENSG0000066044 | UCUGGAA |
| ENSG0000066044 | UGAGAAG |
| ENSG0000066044 | UGAGAAU |
| ENSG0000066044 | UUCAAAU |
| ENSG0000066044 | UUCCAUA |
| ENSG0000066044 | UUCUGCA |
| ENSG0000066044 | UUGGCAA |
| ENSG0000066044 | UUGGCAC |
| ENSG0000066044 | UUUCAAC |
| ENSG0000066056 | CAGCAGA |
| ENSG0000066084 | AAAUUUC |
| ENSG0000066084 | AAGGCAC |
| ENSG0000066084 | AAGUCUU |
| ENSG0000066084 | AAUUAUU |
| ENSG0000066084 | ACAUUCA |
| ENSG0000066084 | AGCACCA |
| ENSG0000066084 | GAGACCU |
| ENSG0000066084 | GCACCAU |
| ENSG0000066084 | GGGGCAG |
| ENSG0000066084 | GUCCAGA |
| ENSG0000066084 | UAAUAGU |
| ENSG0000066084 | UCUGGAA |
| ENSG0000066084 | UUAGGAU |
| ENSG0000066117 | AACACUG |
| ENSG0000066117 | AACGGAA |
| ENSG0000066117 | AAUACUG |
| ENSG0000066117 | ACAGUAC |
| ENSG0000066117 | ACCCGUA |
| ENSG0000066117 | AGGCAGG |
| ENSG0000066117 | CACAGGG |
| ENSG0000066117 | CACUCCU |
| ENSG0000066117 | CAGUGCA |
| ENSG0000066117 | CAGUUAC |
| ENSG0000066117 | CCCACCG |
| ENSG0000066117 | CCCACCU |
| ENSG0000066117 | CCUGCUG |
| ENSG0000066117 | CUCCAGC |
| ENSG0000066117 | CUCCAA  |
| ENSG0000066117 | CUCCAC  |
| ENSG0000066117 | CUGGGCA |
| ENSG0000066117 | GACCUGG |
| ENSG0000066117 | GAGGGGC |
| ENSG0000066117 | GCAUCC  |
| ENSG0000066117 | GCUGUCU |
| ENSG0000066117 | GGAAGAC |
| ENSG0000066117 | GGGGAGC |
| ENSG0000066117 | GGGGUGG |
| ENSG0000066117 | GGGUUUA |
| ENSG0000066117 | GUCAGUU |
| ENSG0000066117 | GUCUCUG |
| ENSG0000066117 | GUGGGGA |
| ENSG0000066117 | UCAACAG |
| ENSG0000066117 | UCCACC  |
| ENSG0000066117 | UGAAGCU |
| ENSG0000066117 | UGAGUCU |
| ENSG0000066136 | AGCCUGC |
| ENSG0000066136 | GCACCAU |
| ENSG0000066136 | UAUUGCU |

|                |          |
|----------------|----------|
| ENSG0000066136 | UGAAGUG  |
| ENSG0000066136 | UGCAUUG  |
| ENSG0000066136 | UGCCAGC  |
| ENSG0000066248 | AAUACUG  |
| ENSG0000066294 | UUAGGAU  |
| ENSG0000066322 | UAUUGCU  |
| ENSG0000066336 | UAAUGCU  |
| ENSG0000066382 | AAAAAUC  |
| ENSG0000066382 | AACACUG  |
| ENSG0000066382 | AAUUUUA  |
| ENSG0000066382 | AGUGCAA  |
| ENSG0000066382 | AUAAAGU  |
| ENSG0000066382 | AUAU AAC |
| ENSG0000066382 | CACAGUG  |
| ENSG0000066382 | CAGUGCA  |
| ENSG0000066382 | UAUAAAG  |
| ENSG0000066382 | UGCAUAG  |
| ENSG0000066405 | GCUGUCU  |
| ENSG0000066405 | UAAUAUC  |
| ENSG0000066422 | AAGGCAC  |
| ENSG0000066422 | AAGUGCA  |
| ENSG0000066422 | ACAUCAC  |
| ENSG0000066422 | CAA AUGC |
| ENSG0000066422 | CUUGUGU  |
| ENSG0000066422 | GUGCUUG  |
| ENSG0000066422 | UGCAAAG  |
| ENSG0000066427 | CCCUGAG  |
| ENSG0000066427 | CUUUGGU  |
| ENSG0000066427 | UUUGCAA  |
| ENSG0000066455 | CCCUGAG  |
| ENSG0000066455 | UCCUGU   |
| ENSG0000066468 | AACAUUC  |
| ENSG0000066468 | AUAAUAC  |
| ENSG0000066468 | AUAU AAC |
| ENSG0000066468 | CCAGCAU  |
| ENSG0000066468 | UGCAUAG  |
| ENSG0000066583 | AGCAGCA  |
| ENSG0000066629 | ACAAU AU |
| ENSG0000066629 | ACAUUCA  |
| ENSG0000066629 | ACUUGGA  |
| ENSG0000066629 | CCAGUGC  |
| ENSG0000066629 | CCUGCUG  |
| ENSG0000066629 | CCUUCU U |
| ENSG0000066629 | CUAUACA  |
| ENSG0000066629 | GACCAUG  |
| ENSG0000066629 | GCAGGUU  |
| ENSG0000066629 | GGUCUAG  |
| ENSG0000066629 | GUCUACU  |
| ENSG0000066629 | UCACAGU  |
| ENSG0000066654 | AAGGCAC  |
| ENSG0000066654 | AAGUAGC  |
| ENSG0000066654 | CAGCUGG  |
| ENSG0000066735 | AAGGCAC  |
| ENSG0000066735 | UACAAAG  |
| ENSG0000066735 | UUGGCAA  |
| ENSG0000066735 | UUGGCAC  |
| ENSG0000066739 | AACAUUC  |
| ENSG0000066739 | ACAUUCA  |
| ENSG0000066739 | ACUGCAU  |
| ENSG0000066739 | ACUUGGA  |
| ENSG0000066739 | AUAAAGU  |
| ENSG0000066739 | AUGUCUG  |
| ENSG0000066739 | CACCAGC  |
| ENSG0000066739 | CAGCAA A |

|                |         |
|----------------|---------|
| ENSG0000066739 | CAUGGAU |
| ENSG0000066739 | GAGAAAU |
| ENSG0000066739 | GGCAGCG |
| ENSG0000066739 | GUCUGCC |
| ENSG0000066739 | UCAUUCG |
| ENSG0000066739 | UGAGAAG |
| ENSG0000066739 | UGAGAAU |
| ENSG0000066739 | UGUCUGC |
| ENSG0000066739 | UUGACAC |
| ENSG0000066739 | UUGGUUC |
| ENSG0000066739 | UUGUUCG |
| ENSG0000066777 | AAGUUGU |
| ENSG0000066777 | ACAGUAU |
| ENSG0000066777 | AGUGCAA |
| ENSG0000066777 | AGUGUGC |
| ENSG0000066777 | CACAGUG |
| ENSG0000066777 | UCCUGAG |
| ENSG0000066827 | AUUCAUU |
| ENSG0000066855 | AGAUAAA |
| ENSG0000066855 | CAGCAGA |
| ENSG0000066855 | CAGCAGG |
| ENSG0000066855 | GGCAAGA |
| ENSG0000066926 | AAAGUUU |
| ENSG0000066926 | UACAAAG |
| ENSG0000067048 | AAAAGUA |
| ENSG0000067048 | AAAGAAU |
| ENSG0000067048 | AAAGUAU |
| ENSG0000067048 | AAGGCAC |
| ENSG0000067048 | AAGUGCA |
| ENSG0000067048 | ACAGUAC |
| ENSG0000067048 | AGCAAAA |
| ENSG0000067048 | AGCCUGC |
| ENSG0000067048 | AUGGCUU |
| ENSG0000067048 | CAGCUGG |
| ENSG0000067048 | CCAGUGU |
| ENSG0000067048 | CCUGCUG |
| ENSG0000067057 | AAGUGCU |
| ENSG0000067057 | AUAAAGU |
| ENSG0000067057 | UACAAAG |
| ENSG0000067064 | GAAAACA |
| ENSG0000067082 | ACAUUCA |
| ENSG0000067082 | GCAUCCC |
| ENSG0000067082 | GGAGGCA |
| ENSG0000067082 | UGGCUGC |
| ENSG0000067113 | AGCAGCA |
| ENSG0000067113 | AGCAGCG |
| ENSG0000067113 | AGCAGCU |
| ENSG0000067141 | AAAAAUC |
| ENSG0000067141 | AACAAAC |
| ENSG0000067141 | AACAUUC |
| ENSG0000067141 | AAGUCUU |
| ENSG0000067141 | AAGUGUG |
| ENSG0000067141 | AAUACUG |
| ENSG0000067141 | AAUCUCA |
| ENSG0000067141 | AAUCUCU |
| ENSG0000067141 | AAUUAUU |
| ENSG0000067141 | ACAUUCA |
| ENSG0000067141 | AUAAUAC |
| ENSG0000067141 | AUGGAUU |
| ENSG0000067141 | CACAAUG |
| ENSG0000067141 | CACAGGG |
| ENSG0000067141 | CAGCAGA |
| ENSG0000067141 | CAGCUGG |
| ENSG0000067141 | CCCUGAG |

|                |         |
|----------------|---------|
| ENSG0000067141 | CUCACAC |
| ENSG0000067141 | CUGCAGG |
| ENSG0000067141 | CUUUGGU |
| ENSG0000067141 | GAGCUGC |
| ENSG0000067141 | GAUUGGU |
| ENSG0000067141 | GCCUGGA |
| ENSG0000067141 | GCUGUCU |
| ENSG0000067141 | GGAUUUU |
| ENSG0000067141 | GGCCUG  |
| ENSG0000067141 | UCACAGU |
| ENSG0000067141 | UCUGGAA |
| ENSG0000067167 | AGAUAAA |
| ENSG0000067167 | CUUUGGU |
| ENSG0000067167 | UAAGACU |
| ENSG0000067167 | UACAAAG |
| ENSG0000067167 | UCAAGUA |
| ENSG0000067177 | AAGGCAC |
| ENSG0000067177 | ACAUUCA |
| ENSG0000067177 | UGAAAUG |
| ENSG0000067191 | AAGUGCA |
| ENSG0000067191 | AGCAGCA |
| ENSG0000067191 | CAGACAG |
| ENSG0000067191 | CAGCAGG |
| ENSG0000067191 | CCCUGAG |
| ENSG0000067191 | GGCAGUG |
| ENSG0000067191 | GGGGCAG |
| ENSG0000067191 | UUGGCAC |
| ENSG0000067191 | UUGGUUC |
| ENSG0000067191 | UUUUUGC |
| ENSG0000067208 | AAAGCUG |
| ENSG0000067208 | ACUGUUU |
| ENSG0000067208 | AGCAGCA |
| ENSG0000067208 | AUCCCUU |
| ENSG0000067208 | AUGCACC |
| ENSG0000067208 | AUGGCAC |
| ENSG0000067208 | AUGGCUU |
| ENSG0000067208 | CAAUUGC |
| ENSG0000067208 | CAAGAGC |
| ENSG0000067208 | CACAGUG |
| ENSG0000067208 | CAGUUAC |
| ENSG0000067208 | CUGGAAA |
| ENSG0000067208 | GUAAACA |
| ENSG0000067208 | GUCUACU |
| ENSG0000067208 | GUGCAA  |
| ENSG0000067208 | UCACAGU |
| ENSG0000067208 | UCAUACA |
| ENSG0000067208 | UCUCAA  |
| ENSG0000067208 | UUCUAAU |
| ENSG0000067208 | UUGGCAC |
| ENSG0000067208 | UUGUGUC |
| ENSG0000067208 | UUUCAAC |
| ENSG0000067208 | UUUGCAA |
| ENSG0000067221 | GGGCCCC |
| ENSG0000067221 | GUAAACA |
| ENSG0000067221 | GUCCAGA |
| ENSG0000067221 | UGCCUG  |
| ENSG0000067225 | GCCUGGA |
| ENSG0000067533 | AACACUG |
| ENSG0000067533 | CAGCUGG |
| ENSG0000067533 | CUCCAUU |
| ENSG0000067533 | CUGGCUC |
| ENSG0000067533 | CUUGGGC |
| ENSG0000067533 | GAGCCCC |
| ENSG0000067533 | GCUGUCU |

|                 |         |
|-----------------|---------|
| ENSG00000067533 | GGCUGCG |
| ENSG00000067533 | GUCUCUG |
| ENSG00000067533 | UCAACAG |
| ENSG00000067533 | UGGCUGC |
| ENSG00000067533 | UUCUUGU |
| ENSG00000067533 | UUGGUCC |
| ENSG00000067560 | AAAACUG |
| ENSG00000067560 | AAUACUG |
| ENSG00000067560 | ACCACAG |
| ENSG00000067560 | AUCAUAC |
| ENSG00000067560 | UCAUACA |
| ENSG00000067606 | UGCAUAU |
| ENSG00000067646 | AAAGUUU |
| ENSG00000067646 | GCAACUU |
| ENSG00000067704 | AUGCCUU |
| ENSG00000067715 | AAAAACC |
| ENSG00000067715 | AAAACUG |
| ENSG00000067715 | AAAGAGG |
| ENSG00000067715 | AACAUUC |
| ENSG00000067715 | AAGUGCA |
| ENSG00000067715 | AAGUUGU |
| ENSG00000067715 | AAUACUG |
| ENSG00000067715 | ACUGGCC |
| ENSG00000067715 | AGUGCCG |
| ENSG00000067715 | AUGGCUU |
| ENSG00000067715 | CAGUGCA |
| ENSG00000067715 | GAAAACA |
| ENSG00000067715 | GAGGUAG |
| ENSG00000067715 | GCAGAAG |
| ENSG00000067715 | GGAAUGU |
| ENSG00000067715 | UAAGACU |
| ENSG00000067715 | UAAUAGU |
| ENSG00000067715 | UAUAAAG |
| ENSG00000067715 | UCACAGU |
| ENSG00000067715 | UCCUAUA |
| ENSG00000067715 | UGAAGUG |
| ENSG00000067715 | UGUAUAA |
| ENSG00000067715 | UUGGUCC |
| ENSG00000067798 | AAGGCAC |
| ENSG00000067798 | ACACACC |
| ENSG00000067798 | ACAGUAU |
| ENSG00000067798 | ACUGUUU |
| ENSG00000067798 | AGCCCUU |
| ENSG00000067798 | AGCCUGC |
| ENSG00000067798 | AGUAGAC |
| ENSG00000067798 | AUUGCAC |
| ENSG00000067798 | CACAGUG |
| ENSG00000067798 | CAGUAGA |
| ENSG00000067798 | CUACAAA |
| ENSG00000067798 | CUCUAGC |
| ENSG00000067798 | GCACCAU |
| ENSG00000067798 | GGAAUGU |
| ENSG00000067798 | GUGCUUG |
| ENSG00000067798 | UAAUGCU |
| ENSG00000067798 | UAGACUG |
| ENSG00000067798 | UGCAUAG |
| ENSG00000067798 | UGCUCAC |
| ENSG00000067798 | UUGGCAC |
| ENSG00000067840 | AGCUGCC |
| ENSG00000067840 | AGGAGCU |
| ENSG00000067840 | CCCCCAG |
| ENSG00000067840 | CCCUGUC |
| ENSG00000067840 | GAGCUGC |
| ENSG00000067840 | GGCAAGA |



|                |          |
|----------------|----------|
| ENSG0000067840 | UGUGCUU  |
| ENSG0000067840 | UUGGCAA  |
| ENSG0000067842 | AAAGAGC  |
| ENSG0000067842 | AGAUAAA  |
| ENSG0000067842 | AGCAGCA  |
| ENSG0000067842 | AUGGCUU  |
| ENSG0000067842 | CCCUGAG  |
| ENSG0000067842 | CUGCUCU  |
| ENSG0000067842 | GCCCUUA  |
| ENSG0000067842 | UACAAAG  |
| ENSG0000067842 | UCCCUGU  |
| ENSG0000067842 | UCUCAAG  |
| ENSG0000067842 | UUGUUCG  |
| ENSG0000067900 | AGUGCUU  |
| ENSG0000067900 | AUGGCUU  |
| ENSG0000067900 | CAAAGCA  |
| ENSG0000067900 | CCAGUGU  |
| ENSG0000067900 | GAGGUUU  |
| ENSG0000067900 | UCCAGUU  |
| ENSG0000067900 | UUGGCAA  |
| ENSG0000067955 | AUCCCUU  |
| ENSG0000067955 | GCUACAU  |
| ENSG0000067955 | UCACAGU  |
| ENSG0000068001 | UACAAAG  |
| ENSG0000068024 | AAAGCUG  |
| ENSG0000068024 | AAAGUAA  |
| ENSG0000068024 | AAAGUGC  |
| ENSG0000068024 | AACUCUA  |
| ENSG0000068024 | AAGUAGC  |
| ENSG0000068024 | AAGUGCU  |
| ENSG0000068024 | AAUACUG  |
| ENSG0000068024 | AAUGCCC  |
| ENSG0000068024 | ACCCUGU  |
| ENSG0000068024 | ACUGUUU  |
| ENSG0000068024 | AGCAUUC  |
| ENSG0000068024 | AGCUGCC  |
| ENSG0000068024 | AGUGGUU  |
| ENSG0000068024 | AGUGUGC  |
| ENSG0000068024 | AUAAAGU  |
| ENSG0000068024 | AUACAAG  |
| ENSG0000068024 | AUACCUC  |
| ENSG0000068024 | AUGGCUU  |
| ENSG0000068024 | CAAAGUG  |
| ENSG0000068024 | CACAGUG  |
| ENSG0000068024 | CAGCAAA  |
| ENSG0000068024 | CGCCUCC  |
| ENSG0000068024 | CUACAAA  |
| ENSG0000068024 | CUGGAAA  |
| ENSG0000068024 | CUGGACU  |
| ENSG0000068024 | CUUACAG  |
| ENSG0000068024 | CUUUGGU  |
| ENSG0000068024 | GAGAAAU  |
| ENSG0000068024 | GCUGGUG  |
| ENSG0000068024 | GGAAUGU  |
| ENSG0000068024 | GGCAUUG  |
| ENSG0000068024 | GGGCCCC  |
| ENSG0000068024 | GGGUAAG  |
| ENSG0000068024 | GUCAGUU  |
| ENSG0000068024 | GUGCAAA  |
| ENSG0000068024 | GUGCCUG  |
| ENSG0000068024 | UAUAAAAG |
| ENSG0000068024 | UCAACAG  |
| ENSG0000068024 | UCACAAG  |
| ENSG0000068024 | UGGGUGA  |

|                |          |
|----------------|----------|
| ENSG0000068028 | CUCUGGG  |
| ENSG0000068078 | AAAAACC  |
| ENSG0000068078 | AAAACUG  |
| ENSG0000068078 | AAAGGUA  |
| ENSG0000068078 | ACAUUCA  |
| ENSG0000068078 | CAAAACU  |
| ENSG0000068078 | GGCUCAG  |
| ENSG0000068078 | UACAAAG  |
| ENSG0000068137 | CCCUGUC  |
| ENSG0000068137 | CUGCAGG  |
| ENSG0000068137 | GCCUGU   |
| ENSG0000068305 | ACAGUAC  |
| ENSG0000068305 | AGAUAAA  |
| ENSG0000068305 | AGCCCUU  |
| ENSG0000068305 | AUAU AAC |
| ENSG0000068305 | AUAUUAU  |
| ENSG0000068305 | CUACAAA  |
| ENSG0000068305 | GUGCAAA  |
| ENSG0000068305 | UACAAAG  |
| ENSG0000068305 | UAUUGCU  |
| ENSG0000068305 | UCAUAGA  |
| ENSG0000068308 | ACAUUAC  |
| ENSG0000068308 | CCCACCU  |
| ENSG0000068308 | CCCCUGG  |
| ENSG0000068308 | CUCCAC   |
| ENSG0000068308 | GGAAUGU  |
| ENSG0000068308 | GGAGGAG  |
| ENSG0000068308 | GGCUCAG  |
| ENSG0000068308 | GGGUCUU  |
| ENSG0000068308 | GGUGGGC  |
| ENSG0000068308 | GUCAACA  |
| ENSG0000068308 | GUGCCAC  |
| ENSG0000068308 | UGGCUGC  |
| ENSG0000068323 | AAAGCGC  |
| ENSG0000068323 | GGAAUGU  |
| ENSG0000068323 | GGGAGCU  |
| ENSG0000068323 | GGGAGC   |
| ENSG0000068323 | GGUGGUU  |
| ENSG0000068323 | UUGGUCC  |
| ENSG0000068354 | AAAUGGU  |
| ENSG0000068354 | ACCACAG  |
| ENSG0000068354 | AGGCAGG  |
| ENSG0000068354 | CAGGAAC  |
| ENSG0000068354 | GGCAGGG  |
| ENSG0000068354 | GGCAGUG  |
| ENSG0000068354 | GGGGCAG  |
| ENSG0000068354 | UGCAAAG  |
| ENSG0000068354 | UGCCAGC  |
| ENSG0000068366 | AAAGUGC  |
| ENSG0000068366 | AAGUGCA  |
| ENSG0000068366 | AGCAGCA  |
| ENSG0000068366 | AGCAGCG  |
| ENSG0000068366 | GGAUUUC  |
| ENSG0000068366 | UCCAGUU  |
| ENSG0000068383 | AACAAAC  |
| ENSG0000068383 | AAUCACU  |
| ENSG0000068383 | AAUUUUA  |
| ENSG0000068383 | ACAUUCA  |
| ENSG0000068383 | ACUGGAU  |
| ENSG0000068383 | ACUUGGA  |
| ENSG0000068383 | AGCAGCU  |
| ENSG0000068383 | AGUAACA  |
| ENSG0000068383 | AUAU AAC |
| ENSG0000068383 | CUCCCAA  |

|                 |          |
|-----------------|----------|
| ENSG00000068383 | CUCCAC   |
| ENSG00000068383 | CUGGAAA  |
| ENSG00000068383 | GAGGUAG  |
| ENSG00000068383 | GAGUAU   |
| ENSG00000068383 | GCACCAU  |
| ENSG00000068383 | GUGAGGU  |
| ENSG00000068383 | UACAAAG  |
| ENSG00000068383 | UAUAAAG  |
| ENSG00000068383 | UCACAUU  |
| ENSG00000068383 | UCACCAC  |
| ENSG00000068383 | UUGGCAC  |
| ENSG00000068615 | AACAAAC  |
| ENSG00000068615 | AAGACAU  |
| ENSG00000068615 | AAGGCAC  |
| ENSG00000068615 | AGUGCAA  |
| ENSG00000068615 | AUGUCUG  |
| ENSG00000068615 | CAAAGCA  |
| ENSG00000068615 | CGGUGCU  |
| ENSG00000068615 | GAGGUAG  |
| ENSG00000068615 | GAGUAU   |
| ENSG00000068615 | GGAUGAG  |
| ENSG00000068615 | GGCUCAG  |
| ENSG00000068615 | GUGCAA   |
| ENSG00000068615 | UAAUACA  |
| ENSG00000068615 | UACAAAG  |
| ENSG00000068615 | UCCUGAG  |
| ENSG00000068615 | UGCAUUG  |
| ENSG00000068615 | UGCCAGC  |
| ENSG00000068615 | UUGCAA   |
| ENSG00000068615 | UUGGCAC  |
| ENSG00000068650 | AAAGUGC  |
| ENSG00000068650 | ACAGGUG  |
| ENSG00000068650 | ACAUUCA  |
| ENSG00000068650 | AUAU AAC |
| ENSG00000068650 | AUGCACC  |
| ENSG00000068650 | AUUGCAC  |
| ENSG00000068650 | CUGCCC   |
| ENSG00000068650 | CUUUGGU  |
| ENSG00000068650 | GUGCAA   |
| ENSG00000068650 | UACAAAG  |
| ENSG00000068650 | UAUUGCU  |
| ENSG00000068650 | UGCAAAG  |
| ENSG00000068650 | UUCUAAU  |
| ENSG00000068697 | AAAGUGC  |
| ENSG00000068697 | AAGUGCA  |
| ENSG00000068697 | GAUUGUC  |
| ENSG00000068697 | UGUCUUU  |
| ENSG00000068724 | CUGCAGC  |
| ENSG00000068793 | AUACAAG  |
| ENSG00000068796 | AAGGCAC  |
| ENSG00000068796 | AGCAGCA  |
| ENSG00000068796 | GAGUAU   |
| ENSG00000068796 | UGUGCUU  |
| ENSG00000068831 | AGGCAGG  |
| ENSG00000068831 | GGCCUG   |
| ENSG00000068831 | UCUGGAA  |
| ENSG00000068831 | UGGCCCU  |
| ENSG00000068885 | AAAACUG  |
| ENSG00000068971 | AAAGCUG  |
| ENSG00000068971 | CCCUGG   |
| ENSG00000069011 | CAAAGUG  |
| ENSG00000069011 | CACAGGG  |
| ENSG00000069011 | GCAACUU  |
| ENSG00000069011 | GCGGGUG  |

|                |         |
|----------------|---------|
| ENSG0000069011 | GUAAACA |
| ENSG0000069011 | GUGCAA  |
| ENSG0000069011 | UAUGGUU |
| ENSG0000069011 | UGCAAAG |
| ENSG0000069122 | AGUGCAA |
| ENSG0000069122 | CUAUACA |
| ENSG0000069275 | AUGGCUU |
| ENSG0000069329 | AAAUUUC |
| ENSG0000069329 | AAGGCAC |
| ENSG0000069329 | GUUAAUG |
| ENSG0000069329 | UAAUAGU |
| ENSG0000069345 | AAAACUG |
| ENSG0000069345 | AAAAGUA |
| ENSG0000069345 | AAAGCUG |
| ENSG0000069345 | AACAGUC |
| ENSG0000069345 | ACCCAUI |
| ENSG0000069345 | AGCAGCA |
| ENSG0000069345 | AGCAGCG |
| ENSG0000069345 | AGCUUAI |
| ENSG0000069345 | AGUGCUU |
| ENSG0000069345 | GCAGGUU |
| ENSG0000069345 | GUGACAG |
| ENSG0000069345 | GUGCAA  |
| ENSG0000069345 | UCAAGUA |
| ENSG0000069345 | UGAAAGG |
| ENSG0000069345 | UGCAAAG |
| ENSG0000069345 | UUAUGCA |
| ENSG0000069345 | UUCAAGC |
| ENSG0000069399 | CACAGUG |
| ENSG0000069399 | CUGCCCC |
| ENSG0000069399 | GUGCAA  |
| ENSG0000069399 | UACAAAG |
| ENSG0000069399 | UAUUACC |
| ENSG0000069399 | UCACAGG |
| ENSG0000069431 | CCAUUAC |
| ENSG0000069493 | UUGGCAA |
| ENSG0000069667 | AAGUGCU |
| ENSG0000069667 | AGAUGUG |
| ENSG0000069702 | AAAACUG |
| ENSG0000069702 | AAUGUUG |
| ENSG0000069702 | ACCUGGA |
| ENSG0000069702 | AGCAGCA |
| ENSG0000069702 | CAAAGUG |
| ENSG0000069702 | GCAGCAU |
| ENSG0000069702 | GGAAUGU |
| ENSG0000069869 | ACCCUGU |
| ENSG0000069869 | CACAGUG |
| ENSG0000069869 | CUCAAAC |
| ENSG0000069956 | AAAGAAU |
| ENSG0000069956 | ACUGUGU |
| ENSG0000069956 | CACAGUG |
| ENSG0000069956 | CACUGUU |
| ENSG0000069956 | CUAUACA |
| ENSG0000069956 | GAGGUAU |
| ENSG0000069956 | GCUGGUG |
| ENSG0000069956 | UGCAUUG |
| ENSG0000069966 | AAGUGCU |
| ENSG0000069966 | UCCACA  |
| ENSG0000069974 | GGCAAGA |
| ENSG0000069998 | GAGGCAG |
| ENSG0000070018 | AAAGCUG |
| ENSG0000070018 | AAGGCAC |
| ENSG0000070018 | ACAUUCA |
| ENSG0000070018 | AGCCCUU |

|                 |         |
|-----------------|---------|
| ENSG00000070018 | AUCGUAC |
| ENSG00000070018 | AUGCCUU |
| ENSG00000070018 | CAAAGCA |
| ENSG00000070018 | CACAGUG |
| ENSG00000070018 | CCAGUAC |
| ENSG00000070018 | CGUACCG |
| ENSG00000070018 | CUCCAGC |
| ENSG00000070018 | CUUGGGC |
| ENSG00000070018 | GAGAAAU |
| ENSG00000070018 | GAGGUAU |
| ENSG00000070018 | GAUUGUC |
| ENSG00000070018 | GCACCAU |
| ENSG00000070018 | GGAAGCC |
| ENSG00000070018 | GGACUGC |
| ENSG00000070018 | GGAGGAG |
| ENSG00000070018 | GGGCCCC |
| ENSG00000070018 | GUCUGCC |
| ENSG00000070018 | UAAGACG |
| ENSG00000070018 | UAAGACU |
| ENSG00000070018 | UAUGGUU |
| ENSG00000070018 | UAUUGCU |
| ENSG00000070018 | UCACAGG |
| ENSG00000070018 | UCACAGU |
| ENSG00000070018 | UGGACUG |
| ENSG00000070018 | UGGCCAC |
| ENSG00000070018 | UUGGAGG |
| ENSG00000070018 | UUGGCAC |
| ENSG00000070018 | UUGUGUC |
| ENSG00000070061 | GAGGUAG |
| ENSG00000070087 | AAAUUUC |
| ENSG00000070087 | ACAAGGU |
| ENSG00000070087 | ACACACU |
| ENSG00000070087 | ACUCCAG |
| ENSG00000070087 | AGUGCCG |
| ENSG00000070087 | AGUGCCU |
| ENSG00000070087 | AGUGCUG |
| ENSG00000070087 | CAGUUAC |
| ENSG00000070087 | CUCACAC |
| ENSG00000070087 | CUCCCAA |
| ENSG00000070087 | GAGGCUG |
| ENSG00000070087 | GAUUGUA |
| ENSG00000070087 | GGAAGAC |
| ENSG00000070087 | GGAAUGU |
| ENSG00000070087 | GGCAUUG |
| ENSG00000070087 | GUAACAG |
| ENSG00000070087 | UCACAAG |
| ENSG00000070087 | UUGGUUC |
| ENSG00000070159 | AAGUAGC |
| ENSG00000070159 | AGCAGCG |
| ENSG00000070159 | AGCAGCU |
| ENSG00000070159 | CACAGUG |
| ENSG00000070159 | CAGUAGA |
| ENSG00000070159 | CAGUAGU |
| ENSG00000070159 | UCACAGG |
| ENSG00000070159 | UCACAGU |
| ENSG00000070159 | UCCAGUU |
| ENSG00000070159 | UCCACA  |
| ENSG00000070159 | UCCUGAG |
| ENSG00000070182 | AAAUGGU |
| ENSG00000070182 | CCCUGAG |
| ENSG00000070182 | CUAGUAA |
| ENSG00000070182 | GCUUCCU |
| ENSG00000070182 | GGAGGAG |
| ENSG00000070182 | GGGGAGC |

|                 |          |
|-----------------|----------|
| ENSG00000070182 | GGGGUGG  |
| ENSG00000070182 | GGGUUUA  |
| ENSG00000070182 | UCCUGU   |
| ENSG00000070182 | UGCAGCU  |
| ENSG00000070182 | UGGACUG  |
| ENSG00000070182 | UGGCUGC  |
| ENSG00000070190 | GACCAUG  |
| ENSG00000070214 | ACCCGUA  |
| ENSG00000070214 | UCCUGU   |
| ENSG00000070214 | UGGCUGC  |
| ENSG00000070269 | AAGGCAC  |
| ENSG00000070269 | AAGUCUU  |
| ENSG00000070269 | AAUUAUU  |
| ENSG00000070269 | ACAUCAC  |
| ENSG00000070269 | ACUCCAG  |
| ENSG00000070269 | ACUGGCC  |
| ENSG00000070269 | ACUGGCU  |
| ENSG00000070269 | AGCUUUAU |
| ENSG00000070269 | AGGACAC  |
| ENSG00000070269 | AUGAGCU  |
| ENSG00000070269 | CAAGAGC  |
| ENSG00000070269 | CACCAGC  |
| ENSG00000070269 | CAGACAG  |
| ENSG00000070269 | CAGGCUC  |
| ENSG00000070269 | CCUUCAU  |
| ENSG00000070269 | CUAUACA  |
| ENSG00000070269 | CUGCAGC  |
| ENSG00000070269 | CUGCAGG  |
| ENSG00000070269 | GAAUUGU  |
| ENSG00000070269 | GAGACCU  |
| ENSG00000070269 | GAUCAGA  |
| ENSG00000070269 | GGCAGCG  |
| ENSG00000070269 | GGGGGAA  |
| ENSG00000070269 | GUGACUG  |
| ENSG00000070269 | UAUGGUU  |
| ENSG00000070269 | UCCUCU   |
| ENSG00000070269 | UGAAAGG  |
| ENSG00000070269 | UGACAUC  |
| ENSG00000070269 | UGCAUUG  |
| ENSG00000070269 | UUGACAC  |
| ENSG00000070269 | UUGAUCA  |
| ENSG00000070366 | AAAAAUC  |
| ENSG00000070366 | CCCCCAG  |
| ENSG00000070366 | GGAAGAC  |
| ENSG00000070366 | GGCUCAG  |
| ENSG00000070366 | GGCUCUG  |
| ENSG00000070366 | GGGUGGU  |
| ENSG00000070366 | GGUUUAC  |
| ENSG00000070366 | UGUCUGC  |
| ENSG00000070367 | AACUACU  |
| ENSG00000070367 | AGCAGCA  |
| ENSG00000070367 | AGUAACA  |
| ENSG00000070367 | AUGCCUU  |
| ENSG00000070367 | AUGGCUU  |
| ENSG00000070367 | AUUGCAC  |
| ENSG00000070367 | CAGCAGA  |
| ENSG00000070367 | CAGCAGG  |
| ENSG00000070367 | CUGCUCA  |
| ENSG00000070367 | CUGGCUC  |
| ENSG00000070367 | GAGGCAG  |
| ENSG00000070367 | GCAGCAU  |
| ENSG00000070367 | GGCUCAG  |
| ENSG00000070367 | GGCUCUG  |
| ENSG00000070367 | GGCUGCG  |

|                 |         |
|-----------------|---------|
| ENSG00000070367 | GUAACAG |
| ENSG00000070367 | GUGCUUG |
| ENSG00000070367 | UAAUAUC |
| ENSG00000070367 | UAUCAGA |
| ENSG00000070367 | UCAACAG |
| ENSG00000070367 | UCACAUU |
| ENSG00000070367 | UCAUUUG |
| ENSG00000070367 | UGUGCUU |
| ENSG00000070367 | UUGACAC |
| ENSG00000070371 | AGCAAAA |
| ENSG00000070371 | CAGGCUC |
| ENSG00000070371 | GGCUCAG |
| ENSG00000070371 | UAAUAUC |
| ENSG00000070404 | AAGGCAC |
| ENSG00000070413 | AAAAAUC |
| ENSG00000070413 | ACAGUAC |
| ENSG00000070413 | AUGGAUU |
| ENSG00000070413 | AUGGCAC |
| ENSG00000070413 | CUCACAC |
| ENSG00000070413 | GGAUGAG |
| ENSG00000070413 | GGCAUUG |
| ENSG00000070413 | UCUCACC |
| ENSG00000070413 | UCUCCAA |
| ENSG00000070413 | UGAAAUG |
| ENSG00000070413 | UUGGCAA |
| ENSG00000070413 | UUGGCAC |
| ENSG00000070423 | UAUAAAG |
| ENSG00000070444 | AAGUCUU |
| ENSG00000070444 | AAUCUCU |
| ENSG00000070444 | ACUCCAG |
| ENSG00000070444 | AGAUGUG |
| ENSG00000070444 | AGCAGCA |
| ENSG00000070444 | AGCAGCG |
| ENSG00000070444 | AGCAGCU |
| ENSG00000070444 | AGCCAGU |
| ENSG00000070444 | AGGGUUG |
| ENSG00000070444 | AGUGCUU |
| ENSG00000070444 | AUUCAUU |
| ENSG00000070444 | CACAGGG |
| ENSG00000070444 | CACUGUU |
| ENSG00000070444 | CAGGAAC |
| ENSG00000070444 | CAGUCUG |
| ENSG00000070444 | CAUGGAU |
| ENSG00000070444 | CCUUCUU |
| ENSG00000070444 | CUGGACU |
| ENSG00000070444 | GACCCUG |
| ENSG00000070444 | GAGGUAG |
| ENSG00000070444 | GAGGUAU |
| ENSG00000070444 | GGAAUGU |
| ENSG00000070444 | GGGGAGC |
| ENSG00000070444 | GGGGUCC |
| ENSG00000070444 | GUAAACA |
| ENSG00000070444 | GUGUGGC |
| ENSG00000070444 | UAUUACC |
| ENSG00000070444 | UCACAGU |
| ENSG00000070444 | UCAUUCG |
| ENSG00000070444 | UCCACA  |
| ENSG00000070444 | UGUGUGG |
| ENSG00000070476 | ACCAUU  |
| ENSG00000070476 | GAGACCU |
| ENSG00000070476 | GUGACUG |
| ENSG00000070476 | UCACACA |
| ENSG00000070476 | UCACCAC |
| ENSG00000070495 | AAGGCAC |

|                 |          |
|-----------------|----------|
| ENSG00000070495 | CCCCUGG  |
| ENSG00000070495 | UGGCUGC  |
| ENSG00000070610 | ACUGGCC  |
| ENSG00000070610 | ACUGGCU  |
| ENSG00000070610 | CUCAGGG  |
| ENSG00000070610 | GAGGCUG  |
| ENSG00000070610 | GAUUGUA  |
| ENSG00000070610 | GAUUGUC  |
| ENSG00000070610 | GGCUCAG  |
| ENSG00000070614 | AAAAACC  |
| ENSG00000070614 | AACGGAA  |
| ENSG00000070614 | AACGGCU  |
| ENSG00000070614 | AAGGCAC  |
| ENSG00000070614 | AAUACUG  |
| ENSG00000070614 | ACAGGUG  |
| ENSG00000070614 | ACAUUAC  |
| ENSG00000070614 | AGCACCA  |
| ENSG00000070614 | AGUGGUU  |
| ENSG00000070614 | AUAU AAC |
| ENSG00000070614 | CAGGAAC  |
| ENSG00000070614 | CCAGUGC  |
| ENSG00000070614 | CUCUAGC  |
| ENSG00000070614 | GAAGGAA  |
| ENSG00000070614 | GAGGCAG  |
| ENSG00000070614 | GAGGGGC  |
| ENSG00000070614 | GAGUAUU  |
| ENSG00000070614 | GAUUGUA  |
| ENSG00000070614 | GCACCAU  |
| ENSG00000070614 | GGAGGAG  |
| ENSG00000070614 | GGCAGUG  |
| ENSG00000070614 | GGCAUUG  |
| ENSG00000070614 | GUCUCUG  |
| ENSG00000070614 | UACAAAG  |
| ENSG00000070614 | UAUUGCU  |
| ENSG00000070614 | UCACAUU  |
| ENSG00000070614 | UCAUAGA  |
| ENSG00000070614 | UUGGCAC  |
| ENSG00000070718 | CAGCAA   |
| ENSG00000070718 | GAGAACU  |
| ENSG00000070718 | UCCAGUU  |
| ENSG00000070718 | UGACCUA  |
| ENSG00000070731 | GCAGAAG  |
| ENSG00000070756 | AAAGUUU  |
| ENSG00000070756 | AAUUUUA  |
| ENSG00000070756 | GGCAUUG  |
| ENSG00000070756 | UACAAAG  |
| ENSG00000070756 | UAUAAUA  |
| ENSG00000070756 | UUUGCAC  |
| ENSG00000070759 | AAGUGCU  |
| ENSG00000070759 | AGUGCAA  |
| ENSG00000070759 | GGAUUUC  |
| ENSG00000070759 | GUAGUGU  |
| ENSG00000070759 | GUGCAA   |
| ENSG00000070759 | UGCAU AU |
| ENSG00000070759 | UUGGUUC  |
| ENSG00000070770 | UCACAUU  |
| ENSG00000070778 | AAAGUGC  |
| ENSG00000070778 | AAGUGCU  |
| ENSG00000070778 | GUAAACA  |
| ENSG00000070778 | GUGCAA   |
| ENSG00000070778 | UUCUUGU  |
| ENSG00000070785 | ACAGGUG  |
| ENSG00000070785 | GGUGGGC  |
| ENSG00000070808 | ACCAGCA  |



|                 |         |
|-----------------|---------|
| ENSG00000070808 | AUAAAGU |
| ENSG00000070808 | CAGACAG |
| ENSG00000070808 | CAGUGCA |
| ENSG00000070808 | CCAGCAU |
| ENSG00000070808 | CUCUUC  |
| ENSG00000070808 | GAGGCAG |
| ENSG00000070808 | UAUAAAG |
| ENSG00000070808 | UAUUACC |
| ENSG00000070808 | UAUUGCU |
| ENSG00000070808 | UCAACAG |
| ENSG00000070808 | UCCAGAG |
| ENSG00000070808 | UGAGAAU |
| ENSG00000070808 | UGCAAAG |
| ENSG00000070808 | UUUCAAC |
| ENSG00000070808 | UUUGCAA |
| ENSG00000070808 | UUUGCAC |
| ENSG00000070814 | GUUCAUG |
| ENSG00000070814 | UCACACA |
| ENSG00000070814 | UCAUUUG |
| ENSG00000070831 | AACACUG |
| ENSG00000070831 | AAGGUGC |
| ENSG00000070831 | AUACAAG |
| ENSG00000070831 | AUGCCUU |
| ENSG00000070831 | AUUGCAC |
| ENSG00000070831 | CACCAGC |
| ENSG00000070831 | CUCACAC |
| ENSG00000070831 | GCAACUU |
| ENSG00000070831 | GCAGAAG |
| ENSG00000070831 | GGAAUGU |
| ENSG00000070831 | GGCUCUG |
| ENSG00000070831 | GUCAUUG |
| ENSG00000070831 | UAUUGCU |
| ENSG00000070831 | UCAACAG |
| ENSG00000070831 | UCACAGU |
| ENSG00000070831 | UCUGGAG |
| ENSG00000070831 | UGCAAAG |
| ENSG00000070831 | UGCAUAU |
| ENSG00000070831 | UUGGUUC |
| ENSG00000070882 | AAAGAAU |
| ENSG00000070882 | AAAGCUG |
| ENSG00000070882 | AAGACAU |
| ENSG00000070882 | ACCAGCA |
| ENSG00000070882 | ACUCCAG |
| ENSG00000070882 | AGCACCA |
| ENSG00000070882 | AUGCACC |
| ENSG00000070882 | CAGCAGA |
| ENSG00000070882 | CCAGCAU |
| ENSG00000070882 | CUCCAGC |
| ENSG00000070882 | CUUUGGU |
| ENSG00000070882 | GAAUUGU |
| ENSG00000070882 | GAGGUAG |
| ENSG00000070882 | GCUGUCU |
| ENSG00000070882 | GUUAAUG |
| ENSG00000070882 | UCAUUUG |
| ENSG00000070882 | UGGGUGA |
| ENSG00000070882 | UUGGUUC |
| ENSG00000070886 | AAUUAUU |
| ENSG00000070886 | ACCCUGU |
| ENSG00000070886 | AGUGCUG |
| ENSG00000070886 | AUAAUAC |
| ENSG00000070886 | AUUGCAC |
| ENSG00000070886 | CCCUGUU |
| ENSG00000070886 | CUGCAGG |
| ENSG00000070886 | CUGUUGA |

|                 |         |
|-----------------|---------|
| ENSG00000070886 | GAAGGAA |
| ENSG00000070886 | GAGGAUA |
| ENSG00000070886 | GGCUCAG |
| ENSG00000070886 | GUGCUUG |
| ENSG00000070886 | UAUAAUA |
| ENSG00000070886 | UAUUGCU |
| ENSG00000070886 | UCUCACC |
| ENSG00000070886 | UGUGCUU |
| ENSG00000070886 | UCCAUA  |
| ENSG00000070886 | UUUGCAC |
| ENSG00000070886 | UUUUUGC |
| ENSG00000070950 | UGCAAAG |
| ENSG00000070961 | AAAAGUA |
| ENSG00000070961 | AAAGUAU |
| ENSG00000070961 | AACAUUC |
| ENSG00000070961 | AAGUAGC |
| ENSG00000070961 | AAGUGUG |
| ENSG00000070961 | CACAGUG |
| ENSG00000070961 | CAGCAGA |
| ENSG00000070961 | CAGUCUG |
| ENSG00000070961 | CUGCUC  |
| ENSG00000070961 | UGAAGUG |
| ENSG00000070961 | UGCAGCU |
| ENSG00000071051 | AAAACUG |
| ENSG00000071051 | AACAUUC |
| ENSG00000071051 | AUAAUAC |
| ENSG00000071051 | AUGGCAC |
| ENSG00000071051 | AUGUGCC |
| ENSG00000071051 | AUGUGGG |
| ENSG00000071051 | CCUGUC  |
| ENSG00000071051 | CCUGUU  |
| ENSG00000071051 | CCUUCUU |
| ENSG00000071051 | GGAAUGU |
| ENSG00000071051 | GGCAAGA |
| ENSG00000071051 | GUAAACA |
| ENSG00000071051 | GUGCCAC |
| ENSG00000071051 | UAUUACC |
| ENSG00000071051 | UGAGAAG |
| ENSG00000071054 | AAAACUG |
| ENSG00000071054 | AACAAAC |
| ENSG00000071054 | AACACUG |
| ENSG00000071054 | AACUACU |
| ENSG00000071054 | AAGACAU |
| ENSG00000071054 | ACAUUAC |
| ENSG00000071054 | ACAUUCA |
| ENSG00000071054 | AGCACCA |
| ENSG00000071054 | AGUGCAA |
| ENSG00000071054 | AUAAUAC |
| ENSG00000071054 | AUAUUAU |
| ENSG00000071054 | AUGCAUU |
| ENSG00000071054 | CAGUCUG |
| ENSG00000071054 | GAGGUAG |
| ENSG00000071054 | GAGGUAU |
| ENSG00000071054 | GGCAGUG |
| ENSG00000071054 | GUAACAG |
| ENSG00000071054 | UACAAAG |
| ENSG00000071054 | UAUAAAG |
| ENSG00000071054 | UAUUACC |
| ENSG00000071054 | UGGCCAC |
| ENSG00000071054 | UGUCUGC |
| ENSG00000071054 | UGUCUUU |
| ENSG00000071054 | UUGGCAC |
| ENSG00000071073 | AAAUUUC |
| ENSG00000071073 | AAGACAU |

|                 |          |
|-----------------|----------|
| ENSG00000071073 | AAGGCAC  |
| ENSG00000071073 | AGGUAGU  |
| ENSG00000071073 | AGUACUG  |
| ENSG00000071073 | AUAU AAC |
| ENSG00000071073 | AUGCAUU  |
| ENSG00000071073 | CAGCAA   |
| ENSG00000071073 | CAGUAGA  |
| ENSG00000071073 | CCCUGAG  |
| ENSG00000071073 | GAGGUAG  |
| ENSG00000071073 | GAGGUAU  |
| ENSG00000071073 | GUAGUGU  |
| ENSG00000071073 | UAAUAGU  |
| ENSG00000071073 | UACAGUU  |
| ENSG00000071073 | UCAUACA  |
| ENSG00000071073 | UCUCAAG  |
| ENSG00000071073 | UCUCACC  |
| ENSG00000071073 | UGUCUUU  |
| ENSG00000071073 | UUGACAC  |
| ENSG00000071073 | UUGUUCG  |
| ENSG00000071127 | AAACUGU  |
| ENSG00000071127 | AAAGCUG  |
| ENSG00000071127 | AAGUGCA  |
| ENSG00000071127 | CCCUGAG  |
| ENSG00000071127 | CUGGAAA  |
| ENSG00000071127 | GUAAACA  |
| ENSG00000071127 | UCUGGAA  |
| ENSG00000071127 | UGUGCUU  |
| ENSG00000071189 | AAUGUUG  |
| ENSG00000071189 | ACAUUAC  |
| ENSG00000071189 | AUUGCAC  |
| ENSG00000071189 | CACCAGC  |
| ENSG00000071189 | GCACCAU  |
| ENSG00000071189 | GUGCUUG  |
| ENSG00000071189 | UAAGACG  |
| ENSG00000071189 | UAAGACU  |
| ENSG00000071205 | UCAUUUG  |
| ENSG00000071242 | AAAGUGC  |
| ENSG00000071242 | AAAUCCC  |
| ENSG00000071242 | AAGUGCU  |
| ENSG00000071242 | AAUACUG  |
| ENSG00000071242 | AGUGCAA  |
| ENSG00000071242 | AGUGCUG  |
| ENSG00000071242 | CAAAGUG  |
| ENSG00000071242 | CUACAAA  |
| ENSG00000071242 | UCAAGUA  |
| ENSG00000071242 | UUGGUUC  |
| ENSG00000071246 | AAUACUG  |
| ENSG00000071246 | AGCUGCC  |
| ENSG00000071246 | AGGCAGG  |
| ENSG00000071246 | CUGGCUC  |
| ENSG00000071246 | GAGCUGC  |
| ENSG00000071246 | GCUACAU  |
| ENSG00000071246 | GGAGGAG  |
| ENSG00000071246 | GGCUCUG  |
| ENSG00000071246 | GUAAACA  |
| ENSG00000071246 | UGCCAGC  |
| ENSG00000071462 | UUCUAAU  |
| ENSG00000071537 | ACAGU AU |
| ENSG00000071537 | ACAUUCA  |
| ENSG00000071537 | ACUGCAG  |
| ENSG00000071537 | ACUGCAU  |
| ENSG00000071537 | AGCAGCU  |
| ENSG00000071537 | AGUGGUU  |
| ENSG00000071537 | AUCCCUU  |

|                 |          |
|-----------------|----------|
| ENSG00000071537 | CCCUGAG  |
| ENSG00000071537 | CUUCACC  |
| ENSG00000071537 | GGAGGCA  |
| ENSG00000071537 | GGCAGGG  |
| ENSG00000071537 | GUCACUC  |
| ENSG00000071537 | GUCAUUG  |
| ENSG00000071537 | UACAAAG  |
| ENSG00000071537 | UCACCAC  |
| ENSG00000071537 | UGAUCCA  |
| ENSG00000071537 | UCCAUA   |
| ENSG00000071564 | AAAAACC  |
| ENSG00000071564 | AAGGCAC  |
| ENSG00000071564 | AAUGUUG  |
| ENSG00000071564 | AAUUAUU  |
| ENSG00000071564 | AGCAGCA  |
| ENSG00000071564 | AUACAAG  |
| ENSG00000071564 | CAAAGUG  |
| ENSG00000071564 | CAGCAGA  |
| ENSG00000071564 | GAGGCAG  |
| ENSG00000071564 | GCUACAU  |
| ENSG00000071564 | UACAAAG  |
| ENSG00000071564 | UAUAAAG  |
| ENSG00000071564 | UUGAGGC  |
| ENSG00000071575 | AACAGUC  |
| ENSG00000071575 | AACAUUC  |
| ENSG00000071575 | AAGGUGC  |
| ENSG00000071575 | ACCCGUA  |
| ENSG00000071575 | ACUGGCC  |
| ENSG00000071575 | AGCUGCC  |
| ENSG00000071575 | AGGACAC  |
| ENSG00000071575 | AGUAACA  |
| ENSG00000071575 | CCCUGAG  |
| ENSG00000071575 | CCUUCUG  |
| ENSG00000071575 | GAGGUAG  |
| ENSG00000071575 | GAGGUAU  |
| ENSG00000071575 | GCACCAU  |
| ENSG00000071575 | GCUUCCU  |
| ENSG00000071575 | GUGACAG  |
| ENSG00000071575 | UAAUACA  |
| ENSG00000071575 | UCACAAG  |
| ENSG00000071575 | UCAUACA  |
| ENSG00000071575 | UCCUGU   |
| ENSG00000071626 | AAAAGUA  |
| ENSG00000071626 | AAAGUUU  |
| ENSG00000071626 | GAUUGUA  |
| ENSG00000071626 | UGUGCUU  |
| ENSG00000071794 | AAUUAUU  |
| ENSG00000071794 | UUGGUCC  |
| ENSG00000071967 | ACUGUUU  |
| ENSG00000071967 | AGCAGCU  |
| ENSG00000071967 | AUAAUAC  |
| ENSG00000071967 | AUAU AAC |
| ENSG00000071967 | AUGUAAU  |
| ENSG00000071967 | CAGCAGA  |
| ENSG00000071967 | UAUAAUA  |
| ENSG00000071967 | UCACAUU  |
| ENSG00000071967 | UCUAGAG  |
| ENSG00000071967 | UGAAAGG  |
| ENSG00000071967 | UUGACAC  |
| ENSG00000072042 | GGCAGUG  |
| ENSG00000072042 | GGGUCUU  |
| ENSG00000072062 | CAAAACU  |
| ENSG00000072062 | CUCCAC   |
| ENSG00000072062 | GGCAGGG  |

|                 |         |
|-----------------|---------|
| ENSG00000072062 | UAAUAGU |
| ENSG00000072062 | UCCCACC |
| ENSG00000072062 | UUUCAAC |
| ENSG00000072071 | AAAGCUG |
| ENSG00000072071 | AAGGCAC |
| ENSG00000072071 | ACCCUGU |
| ENSG00000072071 | AGCAAAA |
| ENSG00000072071 | AGCAGCA |
| ENSG00000072071 | AGCAGCG |
| ENSG00000072071 | AGCAGCU |
| ENSG00000072071 | AGGGAGG |
| ENSG00000072071 | AUACAAG |
| ENSG00000072071 | AUGAGCU |
| ENSG00000072071 | AUGGCAC |
| ENSG00000072071 | CAGCAA  |
| ENSG00000072071 | CAGCUGG |
| ENSG00000072071 | CCCUGUC |
| ENSG00000072071 | CUGGGGG |
| ENSG00000072071 | CUUCUCU |
| ENSG00000072071 | CUUUGGU |
| ENSG00000072071 | GAGACCU |
| ENSG00000072071 | GAUUGUC |
| ENSG00000072071 | GCUGGUG |
| ENSG00000072071 | GGCAGCG |
| ENSG00000072071 | GGCAGUG |
| ENSG00000072071 | GGCUGCG |
| ENSG00000072071 | GGGAACG |
| ENSG00000072071 | GGGGCAG |
| ENSG00000072071 | GGGGUGG |
| ENSG00000072071 | GUCUCUG |
| ENSG00000072071 | GUGCUUG |
| ENSG00000072071 | UCAAGUA |
| ENSG00000072071 | UGAAAUG |
| ENSG00000072071 | UGGCUGC |
| ENSG00000072071 | UGUGCUU |
| ENSG00000072071 | UCCAUA  |
| ENSG00000072071 | UUCUUGU |
| ENSG00000072071 | UUGGCAA |
| ENSG00000072071 | UUGGCAC |
| ENSG00000072071 | UUGUUCG |
| ENSG00000072071 | UUUUUGC |
| ENSG00000072110 | AUAAUAC |
| ENSG00000072110 | AUCAUAC |
| ENSG00000072110 | AUGCACC |
| ENSG00000072110 | GUAAACA |
| ENSG00000072110 | GUGCCUG |
| ENSG00000072110 | UCCUAUA |
| ENSG00000072110 | UUCCUAG |
| ENSG00000072121 | AAGAACC |
| ENSG00000072121 | AGCACCA |
| ENSG00000072121 | AGUGCAA |
| ENSG00000072121 | AGUGCUU |
| ENSG00000072121 | AUGGCAC |
| ENSG00000072121 | GAGGUAU |
| ENSG00000072121 | GUAAACA |
| ENSG00000072121 | GUGCAA  |
| ENSG00000072121 | UCCAGUU |
| ENSG00000072121 | UGAAAGG |
| ENSG00000072121 | UGUGCUU |
| ENSG00000072121 | UUGUUCG |
| ENSG00000072134 | AAACUGU |
| ENSG00000072134 | AAAGCUG |
| ENSG00000072134 | AAGGCAC |
| ENSG00000072134 | ACAGUAC |

|                 |          |
|-----------------|----------|
| ENSG00000072134 | ACAGUAU  |
| ENSG00000072134 | ACAUUAC  |
| ENSG00000072134 | ACAUUCA  |
| ENSG00000072134 | ACUCAA   |
| ENSG00000072134 | AGAUAAA  |
| ENSG00000072134 | AUAAAAGU |
| ENSG00000072134 | AUGACAC  |
| ENSG00000072134 | AUGCCUU  |
| ENSG00000072134 | AUGUGCC  |
| ENSG00000072134 | CAGUGCA  |
| ENSG00000072134 | CUCACAC  |
| ENSG00000072134 | GACCUGG  |
| ENSG00000072134 | GAUCAGA  |
| ENSG00000072134 | GCCUGGG  |
| ENSG00000072134 | GUAAACA  |
| ENSG00000072134 | GUCAACA  |
| ENSG00000072134 | GUGCAA   |
| ENSG00000072134 | UCACAUU  |
| ENSG00000072134 | UCAUGAU  |
| ENSG00000072134 | UUCUGCA  |
| ENSG00000072135 | UGAUCCA  |
| ENSG00000072163 | CCUUCAU  |
| ENSG00000072163 | GGCCUG   |
| ENSG00000072182 | CUCCAGC  |
| ENSG00000072182 | GGGAGCU  |
| ENSG00000072182 | GUGCAA   |
| ENSG00000072182 | UAUAAAG  |
| ENSG00000072195 | CAGCUGG  |
| ENSG00000072195 | GAGGUAG  |
| ENSG00000072195 | GAGGUAU  |
| ENSG00000072195 | GCUGGAU  |
| ENSG00000072195 | GCUGGUG  |
| ENSG00000072195 | GGAAUGU  |
| ENSG00000072201 | UCUGGAA  |
| ENSG00000072201 | UCUGGAG  |
| ENSG00000072210 | CAGACAG  |
| ENSG00000072210 | GGAAGCC  |
| ENSG00000072274 | AACACUG  |
| ENSG00000072274 | AAGGCAC  |
| ENSG00000072274 | AAUUAUU  |
| ENSG00000072274 | ACAGUAU  |
| ENSG00000072274 | ACAUUAC  |
| ENSG00000072274 | ACUGGAU  |
| ENSG00000072274 | CAAAACU  |
| ENSG00000072274 | CACUGUU  |
| ENSG00000072274 | CAGUGCA  |
| ENSG00000072274 | CCAGUAC  |
| ENSG00000072274 | CUGGAAA  |
| ENSG00000072274 | CUUUGGU  |
| ENSG00000072274 | GAGGCAG  |
| ENSG00000072274 | GCAACUU  |
| ENSG00000072274 | GCUUCCU  |
| ENSG00000072274 | GUAACAG  |
| ENSG00000072274 | GUCACUC  |
| ENSG00000072274 | GUCAUUG  |
| ENSG00000072274 | UCCAGUU  |
| ENSG00000072274 | UGGAGAU  |
| ENSG00000072274 | UGGCCAC  |
| ENSG00000072274 | UUCAAGC  |
| ENSG00000072274 | UUGCAA   |
| ENSG00000072274 | UUGGCAC  |
| ENSG00000072274 | UUGUGAC  |
| ENSG00000072274 | UUUGCAC  |
| ENSG00000072310 | AUAAAAGU |

|                 |         |
|-----------------|---------|
| ENSG00000072310 | CAAAACU |
| ENSG00000072310 | UAUAAAG |
| ENSG00000072310 | UCAUUUG |
| ENSG00000072310 | UCUCAAG |
| ENSG00000072310 | UUUGCAA |
| ENSG00000072315 | UCCCUUU |
| ENSG00000072315 | UGUAUAA |
| ENSG00000072364 | AAAGUAC |
| ENSG00000072364 | AAAGUGC |
| ENSG00000072364 | AAGGCAC |
| ENSG00000072364 | AAUUGCU |
| ENSG00000072364 | ACAGUAC |
| ENSG00000072364 | AGCACCA |
| ENSG00000072364 | AGCAGCA |
| ENSG00000072364 | AUGACAC |
| ENSG00000072364 | AUGCAUU |
| ENSG00000072364 | AUGGCAC |
| ENSG00000072364 | AUUGCAC |
| ENSG00000072364 | CAAAGUG |
| ENSG00000072364 | CAGUAGA |
| ENSG00000072364 | CCUUCAU |
| ENSG00000072364 | GAGCCCU |
| ENSG00000072364 | GAUUGUC |
| ENSG00000072364 | GCAACGA |
| ENSG00000072364 | GCACCAU |
| ENSG00000072364 | GCUGUCU |
| ENSG00000072364 | GGCAGUG |
| ENSG00000072364 | GGUUGAC |
| ENSG00000072364 | GUGCUUG |
| ENSG00000072364 | UAUAAAG |
| ENSG00000072364 | UCAUACA |
| ENSG00000072364 | UCCCACC |
| ENSG00000072364 | UGAAAGG |
| ENSG00000072364 | UGAUCCA |
| ENSG00000072364 | UGUAUGU |
| ENSG00000072364 | UGUGCUU |
| ENSG00000072401 | AAUACUG |
| ENSG00000072401 | AGUGCAA |
| ENSG00000072401 | CAGUGCA |
| ENSG00000072401 | UCAAGUA |
| ENSG00000072415 | AGCAGCU |
| ENSG00000072415 | CCAGUGC |
| ENSG00000072415 | CCAGUGU |
| ENSG00000072415 | UCACAUU |
| ENSG00000072415 | UUCAAGC |
| ENSG00000072415 | UUCCUAG |
| ENSG00000072422 | AAAGCUG |
| ENSG00000072422 | AAAGUAC |
| ENSG00000072422 | AAAGUAU |
| ENSG00000072422 | AGAUAAA |
| ENSG00000072422 | AGCCCUU |
| ENSG00000072422 | AUAUUAU |
| ENSG00000072422 | AUGGCAC |
| ENSG00000072422 | CAGGCUC |
| ENSG00000072422 | CAGUGCA |
| ENSG00000072422 | CCAUUAC |
| ENSG00000072422 | CUUUGGU |
| ENSG00000072422 | GAAACAU |
| ENSG00000072422 | GGUUGUC |
| ENSG00000072422 | GUGCUUG |
| ENSG00000072422 | GUGGCC  |
| ENSG00000072422 | UAAUACA |
| ENSG00000072422 | UAAUGCU |
| ENSG00000072422 | UACAAAG |

|                 |         |
|-----------------|---------|
| ENSG00000072422 | UGAUCCA |
| ENSG00000072422 | UGCCUG  |
| ENSG00000072422 | UCAAUU  |
| ENSG00000072422 | UUCUUU  |
| ENSG00000072422 | UUGAUA  |
| ENSG00000072422 | UUGGCAC |
| ENSG00000072422 | UUGGUUC |
| ENSG00000072501 | AAUCCUU |
| ENSG00000072501 | AGCAAAA |
| ENSG00000072501 | AGCCCUU |
| ENSG00000072501 | AGUGCUU |
| ENSG00000072501 | AUCACUA |
| ENSG00000072501 | CAAAUGC |
| ENSG00000072501 | CAGACAG |
| ENSG00000072501 | CAGUCCA |
| ENSG00000072501 | CUCAAAC |
| ENSG00000072501 | CUCACAC |
| ENSG00000072501 | CUUUGGU |
| ENSG00000072501 | GAGGUUU |
| ENSG00000072501 | GUGCCUG |
| ENSG00000072501 | GUGGCC  |
| ENSG00000072501 | UCUAGAG |
| ENSG00000072501 | UCUCCAA |
| ENSG00000072501 | UCUUGAG |
| ENSG00000072501 | UGAAGCU |
| ENSG00000072501 | UGACAUC |
| ENSG00000072501 | UGCCUG  |
| ENSG00000072501 | UUGGAGG |
| ENSG00000072571 | UCAACAG |
| ENSG00000072609 | AAAGCUG |
| ENSG00000072609 | GUAAACA |
| ENSG00000072609 | UCCAGAG |
| ENSG00000072609 | UGAGAAG |
| ENSG00000072609 | UGUGCUU |
| ENSG00000072609 | UUCAAGC |
| ENSG00000072657 | AGGCAGG |
| ENSG00000072657 | AUGGCAC |
| ENSG00000072657 | GAGGUAG |
| ENSG00000072657 | GCAGGAC |
| ENSG00000072657 | GCUGGAU |
| ENSG00000072657 | GUAACAG |
| ENSG00000072657 | GUGCUUG |
| ENSG00000072657 | UGCAUAG |
| ENSG00000072657 | UGCAUUA |
| ENSG00000072657 | UUUGCAC |
| ENSG00000072682 | AAGGCAC |
| ENSG00000072682 | CUUUGGU |
| ENSG00000072682 | GAGGUAG |
| ENSG00000072682 | GAGGUUA |
| ENSG00000072682 | UUUUUGC |
| ENSG00000072736 | AAAGUUA |
| ENSG00000072778 | AAGGCAC |
| ENSG00000072778 | GAGGCAG |
| ENSG00000072786 | AAAAAUC |
| ENSG00000072786 | UACAAAG |
| ENSG00000072786 | UCACAGG |
| ENSG00000072786 | UCACAGU |
| ENSG00000072786 | UCCUGAG |
| ENSG00000072786 | UGCCAGC |
| ENSG00000072803 | AAAGUGC |
| ENSG00000072803 | AAAUUUC |
| ENSG00000072803 | AACAGUC |
| ENSG00000072803 | AAGUCUU |
| ENSG00000072803 | AAGUGCA |



|                 |         |
|-----------------|---------|
| ENSG00000072803 | AAUACUG |
| ENSG00000072803 | ACUCAGC |
| ENSG00000072803 | AGUAGUU |
| ENSG00000072803 | AGUGCAA |
| ENSG00000072803 | AGUGCUU |
| ENSG00000072803 | AUAAUAC |
| ENSG00000072803 | CCAGUGC |
| ENSG00000072803 | CUCCCAA |
| ENSG00000072803 | CUGACUC |
| ENSG00000072803 | GGAGGCA |
| ENSG00000072803 | GUCCAGA |
| ENSG00000072803 | GUGCAA  |
| ENSG00000072803 | UACAAAG |
| ENSG00000072803 | UAGACUG |
| ENSG00000072803 | UAUUACC |
| ENSG00000072803 | UGCAAAG |
| ENSG00000072803 | UGCUCAC |
| ENSG00000072803 | UGGGUGA |
| ENSG00000072803 | UUCAAAU |
| ENSG00000072803 | UUGGCAC |
| ENSG00000072803 | UUGGUCC |
| ENSG00000072832 | ACACACC |
| ENSG00000072832 | GUGCAA  |
| ENSG00000072849 | AAGUGCU |
| ENSG00000072849 | AGUGCUU |
| ENSG00000072849 | AUAAAGU |
| ENSG00000072849 | UUGGCAC |
| ENSG00000072858 | AGCACCA |
| ENSG00000072858 | AGCAGCA |
| ENSG00000072858 | GAGAUGA |
| ENSG00000072952 | AUCCUUG |
| ENSG00000072952 | AUGGCAC |
| ENSG00000072952 | CACACCU |
| ENSG00000072952 | GCCUGGA |
| ENSG00000072952 | GCCUGGG |
| ENSG00000072952 | GGGUAAG |
| ENSG00000072952 | GUGACAG |
| ENSG00000072952 | GUGACUG |
| ENSG00000072952 | GUGCCUG |
| ENSG00000072952 | UGAAAUG |
| ENSG00000072952 | UGACAUC |
| ENSG00000072952 | UGAUCCA |
| ENSG00000072952 | UGUCUUU |
| ENSG00000072952 | UUCAAAU |
| ENSG00000072952 | UUUCAAC |
| ENSG00000072958 | GGGAGCU |
| ENSG00000073060 | CAGUAGA |
| ENSG00000073060 | CCAGUAC |
| ENSG00000073060 | GAGUGUG |
| ENSG00000073060 | UCCAGUU |
| ENSG00000073067 | GGCCUG  |
| ENSG00000073150 | AAAGUGC |
| ENSG00000073150 | AAGUGCA |
| ENSG00000073150 | GAGGUAG |
| ENSG00000073150 | GAUAUGU |
| ENSG00000073150 | GUUAAUG |
| ENSG00000073150 | UAUUGCU |
| ENSG00000073169 | CAGACAG |
| ENSG00000073169 | CAUGGAU |
| ENSG00000073282 | AAAAGUA |
| ENSG00000073282 | AAGUGCU |
| ENSG00000073282 | AGUGCAA |
| ENSG00000073282 | AUUGCAC |
| ENSG00000073282 | GCAACUU |

|                 |         |
|-----------------|---------|
| ENSG00000073282 | GUGCAA  |
| ENSG00000073282 | UAGACUG |
| ENSG00000073282 | UAUUGCU |
| ENSG00000073282 | UCUGGAG |
| ENSG00000073282 | UGAAAUG |
| ENSG00000073282 | UUUGCAC |
| ENSG00000073350 | AAAACUG |
| ENSG00000073350 | AAACUGU |
| ENSG00000073350 | AGUGUGC |
| ENSG00000073350 | CAGUAGA |
| ENSG00000073350 | CAGUAGU |
| ENSG00000073350 | CUACAAA |
| ENSG00000073350 | GUAGUGU |
| ENSG00000073350 | GUGCAA  |
| ENSG00000073417 | AUUGCAC |
| ENSG00000073417 | CAGUAGA |
| ENSG00000073417 | CAGUAGU |
| ENSG00000073417 | GUAGUGU |
| ENSG00000073417 | UGCAUUG |
| ENSG00000073464 | AAGGUGC |
| ENSG00000073464 | CUCUGGG |
| ENSG00000073464 | CUUUGGU |
| ENSG00000073464 | GAGAAAU |
| ENSG00000073464 | GCAUCCC |
| ENSG00000073464 | GUGACUG |
| ENSG00000073464 | UUGGAGG |
| ENSG00000073464 | UUUGCAA |
| ENSG00000073536 | UUGGUCC |
| ENSG00000073584 | AAAGCUG |
| ENSG00000073584 | AAAUGGU |
| ENSG00000073584 | GAAACAU |
| ENSG00000073584 | GGCUCUG |
| ENSG00000073584 | UGUCUUU |
| ENSG00000073598 | AGCAGCU |
| ENSG00000073598 | GCUGGUG |
| ENSG00000073598 | GGCAGUG |
| ENSG00000073670 | AAGACAU |
| ENSG00000073670 | AGCUGCC |
| ENSG00000073670 | CCCUGAG |
| ENSG00000073670 | CUUUGGU |
| ENSG00000073670 | GAGUUGA |
| ENSG00000073670 | GCUACAU |
| ENSG00000073670 | GGAAGCC |
| ENSG00000073670 | GUAAACA |
| ENSG00000073670 | UCACAGG |
| ENSG00000073670 | UGAAAGG |
| ENSG00000073670 | UUGGUUC |
| ENSG00000073711 | AAAGUGC |
| ENSG00000073711 | ACUCCAG |
| ENSG00000073711 | AGGAUGU |
| ENSG00000073711 | AGUGCUG |
| ENSG00000073711 | AGUGCUU |
| ENSG00000073711 | AGUGGUU |
| ENSG00000073711 | CCAGUAC |
| ENSG00000073711 | CCUUCUG |
| ENSG00000073711 | CUUCACC |
| ENSG00000073711 | GAGAUGA |
| ENSG00000073711 | GAGGAUA |
| ENSG00000073711 | GGCAGGG |
| ENSG00000073711 | GUCUCUG |
| ENSG00000073711 | UCAAGUA |
| ENSG00000073711 | UCACAUU |
| ENSG00000073711 | UCCAGAG |
| ENSG00000073711 | UCUGGAA |

|                 |         |
|-----------------|---------|
| ENSG00000073711 | UCUGGAG |
| ENSG00000073756 | ACAGUAU |
| ENSG00000073756 | AGAUGUG |
| ENSG00000073756 | GAGAUGA |
| ENSG00000073756 | GAGCUGC |
| ENSG00000073756 | GAGGCAG |
| ENSG00000073792 | AAAAACC |
| ENSG00000073792 | AACACUG |
| ENSG00000073792 | AACCUGU |
| ENSG00000073792 | AAGGUGC |
| ENSG00000073792 | AAUCUCU |
| ENSG00000073792 | AUCCCUU |
| ENSG00000073792 | CAAGAGC |
| ENSG00000073792 | CACUGUU |
| ENSG00000073792 | CAGGUGA |
| ENSG00000073792 | CAGUAGA |
| ENSG00000073792 | CAGUCUG |
| ENSG00000073792 | CCUUCUG |
| ENSG00000073792 | CUGGGGG |
| ENSG00000073792 | CUGUUGA |
| ENSG00000073792 | GAGGCUG |
| ENSG00000073792 | GAGGUAU |
| ENSG00000073792 | GCCUGGA |
| ENSG00000073792 | GCCUGGG |
| ENSG00000073792 | GCUACAU |
| ENSG00000073792 | GCUGGAU |
| ENSG00000073792 | GCUGGUG |
| ENSG00000073792 | UAGAGGA |
| ENSG00000073792 | UUCAAGC |
| ENSG00000073792 | UUGGUUC |
| ENSG00000073803 | ACAGUAC |
| ENSG00000073803 | ACAGUAU |
| ENSG00000073803 | AGUGCAA |
| ENSG00000073803 | AUUGCAC |
| ENSG00000073803 | UACAAAG |
| ENSG00000073803 | UACAGUU |
| ENSG00000073803 | UAUUGCU |
| ENSG00000073849 | CCAGUGU |
| ENSG00000073849 | CCUGCUG |
| ENSG00000073849 | UUCAAGC |
| ENSG00000073861 | AGCACCA |
| ENSG00000073861 | CCUUCUU |
| ENSG00000073861 | UCUCCAA |
| ENSG00000073910 | AGCAGCA |
| ENSG00000073910 | AGCAGCG |
| ENSG00000073910 | CUUUGGU |
| ENSG00000073910 | UAUUGCU |
| ENSG00000073921 | AAUUGCU |
| ENSG00000073921 | ACAUUCA |
| ENSG00000073921 | ACCCAUU |
| ENSG00000073921 | ACUGCAG |
| ENSG00000073921 | ACUGCAU |
| ENSG00000073921 | AUUCAUU |
| ENSG00000073921 | CAAAGCA |
| ENSG00000073921 | GGAAGCC |
| ENSG00000073921 | GGAAUGU |
| ENSG00000073921 | GUAGUGU |
| ENSG00000073921 | UCAACAG |
| ENSG00000073921 | UCACAUU |
| ENSG00000073921 | UCAUUUG |
| ENSG00000073921 | UGGAUAA |
| ENSG00000074047 | ACAUUCA |
| ENSG00000074047 | GAGGUAU |
| ENSG00000074047 | GCUACAU |

|                 |         |
|-----------------|---------|
| ENSG00000074047 | GCUGGUG |
| ENSG00000074047 | GUAAACA |
| ENSG00000074054 | AAAGCUG |
| ENSG00000074054 | AAUUUUA |
| ENSG00000074054 | ACUCAA  |
| ENSG00000074054 | AGCAGCA |
| ENSG00000074054 | AGCCCUU |
| ENSG00000074054 | AUGGAUU |
| ENSG00000074054 | AUGGCUU |
| ENSG00000074054 | CAGCAGA |
| ENSG00000074054 | CCUUCAU |
| ENSG00000074054 | GAAACAU |
| ENSG00000074054 | GAGACCU |
| ENSG00000074054 | GAUUGUC |
| ENSG00000074054 | GUAACAG |
| ENSG00000074054 | GUCUCUG |
| ENSG00000074181 | AUACAAG |
| ENSG00000074181 | CUCCAUU |
| ENSG00000074181 | CUGGAAA |
| ENSG00000074181 | GGAAUGU |
| ENSG00000074181 | UACAAAG |
| ENSG00000074181 | UCUGGAA |
| ENSG00000074181 | UGAAGUG |
| ENSG00000074201 | CUACAAA |
| ENSG00000074211 | AAAGAAU |
| ENSG00000074211 | AACAAAC |
| ENSG00000074211 | ACAAGGU |
| ENSG00000074211 | ACACACC |
| ENSG00000074211 | ACACACU |
| ENSG00000074211 | AUGCACC |
| ENSG00000074211 | GAUUGUA |
| ENSG00000074211 | GAUUGUC |
| ENSG00000074211 | GUAACAG |
| ENSG00000074211 | GUCCAGA |
| ENSG00000074211 | GUGCUUG |
| ENSG00000074211 | UAAGACG |
| ENSG00000074211 | UAUAAUA |
| ENSG00000074211 | UCAACAG |
| ENSG00000074211 | UCAUUCG |
| ENSG00000074211 | UGUGCUU |
| ENSG00000074211 | UUGUGAC |
| ENSG00000074219 | CACUCCU |
| ENSG00000074219 | CCCACCU |
| ENSG00000074219 | GGCUCUG |
| ENSG00000074219 | GGGGUCC |
| ENSG00000074219 | GUGAGGU |
| ENSG00000074266 | ACAGUAC |
| ENSG00000074317 | AUUCAUU |
| ENSG00000074317 | CAUGGAU |
| ENSG00000074317 | CUGGCUC |
| ENSG00000074317 | CUGGGGG |
| ENSG00000074317 | GCUACAU |
| ENSG00000074317 | GCUGGUG |
| ENSG00000074317 | GGCUCUG |
| ENSG00000074317 | UGUGCUU |
| ENSG00000074319 | AAAGUGC |
| ENSG00000074319 | AAGUGCA |
| ENSG00000074356 | AUAAUAC |
| ENSG00000074356 | AUACAAG |
| ENSG00000074356 | CAAGAGC |
| ENSG00000074356 | CACAAUG |
| ENSG00000074356 | CACAGUG |
| ENSG00000074356 | CAGGUGA |
| ENSG00000074356 | CCUUCUU |

|                 |         |
|-----------------|---------|
| ENSG00000074356 | CUAUACA |
| ENSG00000074356 | CUGCAGG |
| ENSG00000074356 | CUGCUCA |
| ENSG00000074356 | CUUUGGU |
| ENSG00000074356 | GAGAAGA |
| ENSG00000074356 | GAGCUGC |
| ENSG00000074356 | GCUGGUG |
| ENSG00000074356 | GGAUGAG |
| ENSG00000074356 | GUAACAG |
| ENSG00000074356 | UAAUACA |
| ENSG00000074356 | UAGUGAG |
| ENSG00000074356 | UCUGGAG |
| ENSG00000074356 | UGAGAAG |
| ENSG00000074370 | CAGCUGG |
| ENSG00000074370 | GAGGCAG |
| ENSG00000074370 | UGACAUC |
| ENSG00000074410 | CAAAGCA |
| ENSG00000074410 | CACAGUG |
| ENSG00000074410 | GCUGUCU |
| ENSG00000074410 | GUCCAGA |
| ENSG00000074416 | AAAGUGC |
| ENSG00000074416 | AUAAAGU |
| ENSG00000074416 | AUAUUAU |
| ENSG00000074416 | AUUGCAC |
| ENSG00000074416 | GAAAACA |
| ENSG00000074416 | GAGGGGC |
| ENSG00000074416 | GAGGUAG |
| ENSG00000074416 | GCCCUUA |
| ENSG00000074416 | GGCAGGG |
| ENSG00000074416 | UAUUGCU |
| ENSG00000074527 | AAGUGCU |
| ENSG00000074527 | AGUGCUU |
| ENSG00000074590 | AAAACUG |
| ENSG00000074590 | ACUCAA  |
| ENSG00000074590 | AGAUGUG |
| ENSG00000074590 | AGCAGCA |
| ENSG00000074590 | AUGCCUU |
| ENSG00000074590 | CAGCAGG |
| ENSG00000074590 | CUCAAAC |
| ENSG00000074590 | CUGGGCA |
| ENSG00000074590 | GAAAACA |
| ENSG00000074590 | GAGGCAG |
| ENSG00000074590 | GCAGCAU |
| ENSG00000074590 | GCCUGGG |
| ENSG00000074590 | GGGUCUU |
| ENSG00000074590 | GGUGGUU |
| ENSG00000074590 | GUAAACA |
| ENSG00000074590 | GUGCAA  |
| ENSG00000074590 | UGGCUGC |
| ENSG00000074590 | UGGGUGA |
| ENSG00000074590 | UUGGCAC |
| ENSG00000074603 | AAAACUG |
| ENSG00000074603 | AUGGCAC |
| ENSG00000074621 | AGCAGCA |
| ENSG00000074621 | UGAAAUG |
| ENSG00000074657 | AAAGUGC |
| ENSG00000074657 | AAGAACC |
| ENSG00000074657 | AAGACAU |
| ENSG00000074657 | AGCACCA |
| ENSG00000074657 | AGCAGCA |
| ENSG00000074657 | AGCCCUU |
| ENSG00000074657 | AGUACUG |
| ENSG00000074657 | AUUGCAC |
| ENSG00000074657 | CAAGAGC |

|                 |         |
|-----------------|---------|
| ENSG00000074657 | CUACAGU |
| ENSG00000074657 | CUGCCCC |
| ENSG00000074657 | GAGAAAU |
| ENSG00000074657 | GCAUCCC |
| ENSG00000074657 | GGCUCAG |
| ENSG00000074657 | UAAUACA |
| ENSG00000074657 | UACAGUU |
| ENSG00000074657 | UUGGCAA |
| ENSG00000074657 | UUGGCAC |
| ENSG00000074695 | AAAUGGU |
| ENSG00000074695 | AGCAGCU |
| ENSG00000074695 | CUUUGGU |
| ENSG00000074695 | GGUUACC |
| ENSG00000074695 | UCCCUCU |
| ENSG00000074696 | AAAGCUG |
| ENSG00000074696 | CUCAAAC |
| ENSG00000074696 | UAAUAGU |
| ENSG00000074696 | UGCAAAG |
| ENSG00000074696 | UGUUGAA |
| ENSG00000074755 | AAAAACC |
| ENSG00000074755 | AUGUCUG |
| ENSG00000074755 | GUCACUC |
| ENSG00000074755 | UAUUGCU |
| ENSG00000074755 | UCCUGAG |
| ENSG00000074755 | UGCAUAG |
| ENSG00000074755 | UGUCUGC |
| ENSG00000074755 | UUGGCAA |
| ENSG00000074755 | UUUCAAC |
| ENSG00000074800 | AGCUGCC |
| ENSG00000074800 | GAGCUGC |
| ENSG00000074803 | GAUCAGA |
| ENSG00000075035 | AAUCCUU |
| ENSG00000075035 | ACAUUCA |
| ENSG00000075035 | AGCACCA |
| ENSG00000075035 | AUGGCUU |
| ENSG00000075035 | CCCUGG  |
| ENSG00000075035 | CUCUUCC |
| ENSG00000075035 | GACCUGG |
| ENSG00000075035 | GAGCCCC |
| ENSG00000075035 | GCAGGAC |
| ENSG00000075035 | GGAAUGU |
| ENSG00000075035 | GGAGAGA |
| ENSG00000075035 | GGCAGUG |
| ENSG00000075035 | UGACCUA |
| ENSG00000075142 | AAUGUUG |
| ENSG00000075142 | GUGACAG |
| ENSG00000075151 | AGGCAGG |
| ENSG00000075151 | GAGGCAG |
| ENSG00000075213 | AACCUGU |
| ENSG00000075213 | AAUGCCC |
| ENSG00000075213 | ACUGCAG |
| ENSG00000075213 | AGGUAGU |
| ENSG00000075213 | AGUAGAC |
| ENSG00000075213 | AUUGCAC |
| ENSG00000075213 | CAAAGCA |
| ENSG00000075213 | CAGUAGA |
| ENSG00000075213 | CCUGUAC |
| ENSG00000075213 | CUCAGGG |
| ENSG00000075213 | CUCCAGC |
| ENSG00000075213 | GGUAGAC |
| ENSG00000075213 | UCUAGAG |
| ENSG00000075213 | UGCUGAC |
| ENSG00000075223 | AACAUUC |
| ENSG00000075240 | AAAAACC |

|                 |         |
|-----------------|---------|
| ENSG00000075240 | AAUUAUU |
| ENSG00000075240 | ACAGUAU |
| ENSG00000075240 | AGGAUGU |
| ENSG00000075240 | AUACAAG |
| ENSG00000075240 | AUGGCUU |
| ENSG00000075240 | AUUGCAC |
| ENSG00000075240 | CAGACAG |
| ENSG00000075240 | GUCAGUU |
| ENSG00000075240 | UAUAAUA |
| ENSG00000075240 | UAUUGCU |
| ENSG00000075240 | UCCCUUU |
| ENSG00000075240 | UGCAAAG |
| ENSG00000075275 | AAAGUAU |
| ENSG00000075275 | AAGACAU |
| ENSG00000075275 | AAGUCUU |
| ENSG00000075275 | AGCAGCU |
| ENSG00000075275 | AUAAAGU |
| ENSG00000075275 | AUAUAAC |
| ENSG00000075275 | GUGCAAA |
| ENSG00000075275 | UAAGACG |
| ENSG00000075275 | UAAGACU |
| ENSG00000075275 | UCAAGUA |
| ENSG00000075275 | UCCAGUU |
| ENSG00000075275 | UUGGCAA |
| ENSG00000075340 | GCAGCAU |
| ENSG00000075388 | AAAGUGC |
| ENSG00000075388 | AAGUGCA |
| ENSG00000075391 | AAAAAUC |
| ENSG00000075391 | AACCUGG |
| ENSG00000075391 | AACUCUA |
| ENSG00000075391 | ACAUUAC |
| ENSG00000075391 | ACUGCAG |
| ENSG00000075391 | AGUGCUU |
| ENSG00000075391 | AUAUUAU |
| ENSG00000075391 | UUUCAAC |
| ENSG00000075407 | UCCACC  |
| ENSG00000075413 | AGCACCA |
| ENSG00000075413 | AGUGCAA |
| ENSG00000075413 | GAAAACA |
| ENSG00000075413 | GUAGUGU |
| ENSG00000075413 | UAUUGCU |
| ENSG00000075415 | AAAAGUA |
| ENSG00000075415 | AACACUG |
| ENSG00000075415 | AUAUAAC |
| ENSG00000075415 | CUACAGU |
| ENSG00000075420 | AAGGUGC |
| ENSG00000075420 | AAUGCCC |
| ENSG00000075420 | AGCAGCA |
| ENSG00000075420 | AGCAUUC |
| ENSG00000075420 | AGUACUG |
| ENSG00000075420 | AUAUUAU |
| ENSG00000075420 | AUGGCAC |
| ENSG00000075420 | CACAAUG |
| ENSG00000075420 | CCCUGAG |
| ENSG00000075420 | CUUUGGU |
| ENSG00000075420 | GAGAUGA |
| ENSG00000075420 | GAGGUAG |
| ENSG00000075420 | GAGGUAU |
| ENSG00000075420 | GAUAUGU |
| ENSG00000075420 | GCUACAU |
| ENSG00000075420 | GGCAGUG |
| ENSG00000075420 | GUAAACA |
| ENSG00000075420 | GUGCAAA |
| ENSG00000075420 | UACAGUU |

|                 |         |
|-----------------|---------|
| ENSG00000075420 | UUCAAAU |
| ENSG00000075420 | UUUUUGC |
| ENSG00000075426 | AAGGCAC |
| ENSG00000075426 | AAGGUGC |
| ENSG00000075426 | ACGCUCA |
| ENSG00000075426 | AUUGCAC |
| ENSG00000075426 | CAGCAA  |
| ENSG00000075426 | GAGACGC |
| ENSG00000075426 | GCCUGGG |
| ENSG00000075426 | GCUGGUG |
| ENSG00000075426 | GGAGAGA |
| ENSG00000075426 | UGAAAUG |
| ENSG00000075426 | UUGGCAA |
| ENSG00000075461 | AGCACCA |
| ENSG00000075461 | AGCAGCU |
| ENSG00000075461 | CUCAAC  |
| ENSG00000075461 | GAGGUAG |
| ENSG00000075539 | AAGGUGC |
| ENSG00000075539 | AGCAGCA |
| ENSG00000075539 | AGCAUUC |
| ENSG00000075539 | AUUGCAC |
| ENSG00000075539 | CAGUGCA |
| ENSG00000075539 | CUGCAGC |
| ENSG00000075539 | GAGAACU |
| ENSG00000075539 | GAUCAGA |
| ENSG00000075539 | GUCUCUG |
| ENSG00000075539 | GUGCUUG |
| ENSG00000075539 | UCACACA |
| ENSG00000075539 | UCACAGU |
| ENSG00000075539 | UUCAAAU |
| ENSG00000075539 | UUGGUUC |
| ENSG00000075568 | AAAGUAC |
| ENSG00000075618 | AAAGAGG |
| ENSG00000075618 | AUACAAG |
| ENSG00000075618 | CUGGGGG |
| ENSG00000075618 | GGCUCAG |
| ENSG00000075618 | UACAAAG |
| ENSG00000075618 | UUCUGCA |
| ENSG00000075618 | UUGGUCC |
| ENSG00000075624 | UCCUGAG |
| ENSG00000075651 | GAAAACA |
| ENSG00000075651 | GAGCUGC |
| ENSG00000075651 | UUGAUCA |
| ENSG00000075711 | AAAGAGG |
| ENSG00000075711 | AACAAAC |
| ENSG00000075711 | AAUCUCU |
| ENSG00000075711 | AGCACCA |
| ENSG00000075711 | AGGCAGG |
| ENSG00000075711 | AUAAAGU |
| ENSG00000075711 | AUGUAAU |
| ENSG00000075711 | GGAAUGU |
| ENSG00000075711 | GGGUAAG |
| ENSG00000075711 | UACAAAG |
| ENSG00000075711 | UAUAAAG |
| ENSG00000075711 | UCACAUU |
| ENSG00000075711 | UCCCUUG |
| ENSG00000075711 | UCCCUUU |
| ENSG00000075711 | UGGAUAA |
| ENSG00000075711 | UCCUAG  |
| ENSG00000075785 | AAAGUAA |
| ENSG00000075785 | AAAUGGU |
| ENSG00000075785 | AAUACUG |
| ENSG00000075785 | AUAUUAU |
| ENSG00000075785 | CAAAACU |



|                 |          |
|-----------------|----------|
| ENSG00000075785 | GAAGGAA  |
| ENSG00000075785 | GAGAUGA  |
| ENSG00000075785 | UGCAUAG  |
| ENSG00000075790 | GAGGUAG  |
| ENSG00000075790 | GAGGUAU  |
| ENSG00000075790 | UUGAGGC  |
| ENSG00000075826 | GAGGUAG  |
| ENSG00000075856 | UACAAAG  |
| ENSG00000075884 | AAAAAUC  |
| ENSG00000075884 | AGAUGUG  |
| ENSG00000075891 | ACACACC  |
| ENSG00000075891 | AGCAGCA  |
| ENSG00000075891 | CAAAGCA  |
| ENSG00000075891 | CACACCG  |
| ENSG00000075891 | CAGACAG  |
| ENSG00000075891 | CCCCCAG  |
| ENSG00000075891 | CUACAGU  |
| ENSG00000075891 | GAUUGUA  |
| ENSG00000075891 | GAUUGUC  |
| ENSG00000075891 | GUGCUUG  |
| ENSG00000075891 | GUGUCAC  |
| ENSG00000075891 | UGCAAAG  |
| ENSG00000075891 | UGCAUAU  |
| ENSG00000075891 | UGUGCUU  |
| ENSG00000075891 | UGUGUCA  |
| ENSG00000075891 | UGUGUGG  |
| ENSG00000075891 | UUUGCAC  |
| ENSG00000075891 | UUUUUGC  |
| ENSG00000075945 | AUGCAUU  |
| ENSG00000075975 | AAUUUUA  |
| ENSG00000075975 | GGGUUUA  |
| ENSG00000075975 | UACAGUU  |
| ENSG00000075975 | UAUUGCU  |
| ENSG00000076043 | UACAAAG  |
| ENSG00000076043 | UGCAUUG  |
| ENSG00000076053 | CCCUGAG  |
| ENSG00000076053 | UGAAAGG  |
| ENSG00000076053 | UUCCUCG  |
| ENSG00000076067 | UUUGCAA  |
| ENSG00000076108 | AAACUGU  |
| ENSG00000076108 | AAAGUUU  |
| ENSG00000076108 | AAAUUUC  |
| ENSG00000076108 | AAGUCAC  |
| ENSG00000076108 | ACACACU  |
| ENSG00000076108 | ACAGUAC  |
| ENSG00000076108 | ACAUCAC  |
| ENSG00000076108 | ACAUUAC  |
| ENSG00000076108 | ACAUUCA  |
| ENSG00000076108 | ACCCGUA  |
| ENSG00000076108 | ACUGGCC  |
| ENSG00000076108 | ACUGGCU  |
| ENSG00000076108 | AGCAGCA  |
| ENSG00000076108 | AGCAGCU  |
| ENSG00000076108 | AGUAGUU  |
| ENSG00000076108 | AGUGCAA  |
| ENSG00000076108 | AGUGCCU  |
| ENSG00000076108 | AUAAAGU  |
| ENSG00000076108 | AUAU AAC |
| ENSG00000076108 | AUGCAUU  |
| ENSG00000076108 | AUUGCAC  |
| ENSG00000076108 | CAAUUGC  |
| ENSG00000076108 | CAGCAGA  |
| ENSG00000076108 | CAGUAGU  |
| ENSG00000076108 | CAGUGCA  |

|                 |          |
|-----------------|----------|
| ENSG00000076108 | CCAGUGC  |
| ENSG00000076108 | CCCUGAG  |
| ENSG00000076108 | CCUGCUG  |
| ENSG00000076108 | CUACAGU  |
| ENSG00000076108 | CUGCCCC  |
| ENSG00000076108 | GAGGCUG  |
| ENSG00000076108 | GAUUGGU  |
| ENSG00000076108 | GCGGGUG  |
| ENSG00000076108 | GGAAGCC  |
| ENSG00000076108 | GGCAGUG  |
| ENSG00000076108 | GUCCAGA  |
| ENSG00000076108 | GUGCCUG  |
| ENSG00000076108 | UAUAAAAG |
| ENSG00000076108 | UAUUGCU  |
| ENSG00000076108 | UCCAGUU  |
| ENSG00000076108 | UCCCUUU  |
| ENSG00000076108 | UUCAAAU  |
| ENSG00000076108 | UUGAGGC  |
| ENSG00000076108 | UUGAUCA  |
| ENSG00000076108 | UUGGUUC  |
| ENSG00000076201 | AAAGAGC  |
| ENSG00000076201 | AGCAAAA  |
| ENSG00000076248 | AGCAGCA  |
| ENSG00000076321 | AAAGUGC  |
| ENSG00000076321 | AAGUGCA  |
| ENSG00000076321 | AGUGCAA  |
| ENSG00000076321 | GAGGCAG  |
| ENSG00000076321 | GUGCAA   |
| ENSG00000076321 | UUCUGCA  |
| ENSG00000076321 | UUGAGGC  |
| ENSG00000076351 | GAGGCUG  |
| ENSG00000076351 | GUGCCUG  |
| ENSG00000076351 | UUGGCAC  |
| ENSG00000076356 | AAAGUUU  |
| ENSG00000076356 | AACAAAC  |
| ENSG00000076356 | AAUACUG  |
| ENSG00000076356 | ACAAUAU  |
| ENSG00000076356 | ACAUCAC  |
| ENSG00000076356 | ACUCAGG  |
| ENSG00000076356 | ACUGCAG  |
| ENSG00000076356 | ACUGCAU  |
| ENSG00000076356 | AGCAGCA  |
| ENSG00000076356 | AGGCAGG  |
| ENSG00000076356 | AUAUUAU  |
| ENSG00000076356 | CAGGCUC  |
| ENSG00000076356 | CAUAUUG  |
| ENSG00000076356 | CCAGUGC  |
| ENSG00000076356 | CUCAGGG  |
| ENSG00000076356 | CUCUCC   |
| ENSG00000076356 | CUUUGGU  |
| ENSG00000076356 | GAAAACA  |
| ENSG00000076356 | GAAGGUC  |
| ENSG00000076356 | GAGGCUG  |
| ENSG00000076356 | GGAAGCC  |
| ENSG00000076356 | GGCAAGA  |
| ENSG00000076356 | GUAAACA  |
| ENSG00000076356 | GUCUUGC  |
| ENSG00000076356 | GUGAAUG  |
| ENSG00000076356 | GUGUCAC  |
| ENSG00000076356 | UAAUACA  |
| ENSG00000076356 | UAGGGCC  |
| ENSG00000076356 | UAUAAUA  |
| ENSG00000076356 | UAUUGCU  |
| ENSG00000076356 | UCAAGUA  |

|                 |         |
|-----------------|---------|
| ENSG00000076356 | UGCAGCU |
| ENSG00000076356 | UGGAUAA |
| ENSG00000076356 | UGUGCUU |
| ENSG00000076356 | UUGGUCC |
| ENSG00000076513 | AACUCUA |
| ENSG00000076513 | AAGGCAC |
| ENSG00000076513 | CAGUGCA |
| ENSG00000076513 | CUUGUAU |
| ENSG00000076513 | GACCUGG |
| ENSG00000076513 | GAGAAAU |
| ENSG00000076513 | GUGAGGU |
| ENSG00000076513 | UAUUGCU |
| ENSG00000076513 | UCCCUUG |
| ENSG00000076513 | UUCAAAU |
| ENSG00000076554 | AAAGCUG |
| ENSG00000076554 | AAAGGUA |
| ENSG00000076554 | AAGAACC |
| ENSG00000076554 | CACUCCU |
| ENSG00000076554 | CUCUAGC |
| ENSG00000076554 | CUCUUCC |
| ENSG00000076554 | GAGACCU |
| ENSG00000076554 | GUCACUC |
| ENSG00000076554 | UGCAGCU |
| ENSG00000076554 | UUGGUUC |
| ENSG00000076555 | CCCUGAG |
| ENSG00000076604 | AGCACCA |
| ENSG00000076604 | AGCCCUU |
| ENSG00000076604 | AUGGCUU |
| ENSG00000076604 | AUGUCUG |
| ENSG00000076604 | CAGUCCA |
| ENSG00000076604 | CCCCUGG |
| ENSG00000076604 | CCUGCUG |
| ENSG00000076604 | CUGCCCC |
| ENSG00000076604 | CUUGGGC |
| ENSG00000076604 | GGCUCUG |
| ENSG00000076604 | GGGGUCC |
| ENSG00000076604 | GGGUGGU |
| ENSG00000076604 | GUCUGCC |
| ENSG00000076604 | UCUCAAG |
| ENSG00000076604 | UGGGACA |
| ENSG00000076604 | UGUCUGC |
| ENSG00000076641 | AGCCCUU |
| ENSG00000076641 | AUGCAUU |
| ENSG00000076641 | AUGUGCC |
| ENSG00000076641 | CCAGGAG |
| ENSG00000076641 | CCAUUAC |
| ENSG00000076641 | GAGGCAG |
| ENSG00000076641 | GAGGUAU |
| ENSG00000076641 | GCAGCAU |
| ENSG00000076641 | UACAAAG |
| ENSG00000076641 | UCAUACA |
| ENSG00000076641 | UCAUUUG |
| ENSG00000076641 | UCCUAUA |
| ENSG00000076641 | UGCAUUG |
| ENSG00000076641 | UGGCCAC |
| ENSG00000076641 | UUAGAGA |
| ENSG00000076641 | UUUCAAC |
| ENSG00000076685 | UGAAGUG |
| ENSG00000076706 | UGCAAAG |
| ENSG00000076716 | AAACUGU |
| ENSG00000076716 | AAGGCAC |
| ENSG00000076716 | AUGCCUU |
| ENSG00000076716 | GAGCUAA |
| ENSG00000076716 | UCAAGUA |

|                 |         |
|-----------------|---------|
| ENSG00000076716 | UCACAUU |
| ENSG00000076770 | AAAUGGU |
| ENSG00000076770 | AACACUG |
| ENSG00000076770 | ACUCCAG |
| ENSG00000076770 | UCUCCAA |
| ENSG00000076826 | AAUUAAU |
| ENSG00000076826 | CCCUGAG |
| ENSG00000076826 | GAGCCCC |
| ENSG00000076826 | GAGCCCU |
| ENSG00000076826 | GCAGGAC |
| ENSG00000076864 | GGCAGGG |
| ENSG00000076864 | UGUGCUU |
| ENSG00000076928 | AAGGCAC |
| ENSG00000076928 | CCCUGAG |
| ENSG00000076984 | AAAGUUU |
| ENSG00000076984 | AACACUG |
| ENSG00000076984 | AGCAGCU |
| ENSG00000076984 | CACAGUG |
| ENSG00000076984 | CAGCUGG |
| ENSG00000076984 | CCCUGG  |
| ENSG00000076984 | CCCUGAG |
| ENSG00000076984 | CCUGCUG |
| ENSG00000076984 | CUUUGGU |
| ENSG00000076984 | GAAGGUC |
| ENSG00000076984 | GCUGGUG |
| ENSG00000076984 | GCUGUCU |
| ENSG00000076984 | GGCCUG  |
| ENSG00000076984 | GGGUGG  |
| ENSG00000076984 | UACAAAG |
| ENSG00000076984 | UCACAGG |
| ENSG00000076984 | UCACAGU |
| ENSG00000077044 | GCACCAU |
| ENSG00000077063 | AGGCAGG |
| ENSG00000077080 | ACAUCAC |
| ENSG00000077092 | AAAGGUA |
| ENSG00000077092 | AAAGUGC |
| ENSG00000077092 | AGCACCA |
| ENSG00000077092 | AGCCAGU |
| ENSG00000077092 | AGUGCUG |
| ENSG00000077092 | AUGGCUU |
| ENSG00000077092 | CAGUAC  |
| ENSG00000077092 | CCAGGAG |
| ENSG00000077092 | UAUAUGA |
| ENSG00000077092 | UGCCAGC |
| ENSG00000077092 | UUGGUCC |
| ENSG00000077097 | AAAAACC |
| ENSG00000077097 | AAACUGU |
| ENSG00000077097 | UCAUUUG |
| ENSG00000077147 | AACAAAC |
| ENSG00000077147 | AAUCUCU |
| ENSG00000077147 | ACAGUUA |
| ENSG00000077147 | ACAUUAC |
| ENSG00000077147 | ACAUUCA |
| ENSG00000077147 | AUGAGCU |
| ENSG00000077147 | CAGUAC  |
| ENSG00000077147 | CCAGUGU |
| ENSG00000077147 | CCUUCAU |
| ENSG00000077147 | CUUCACC |
| ENSG00000077147 | CUUUGGU |
| ENSG00000077147 | GGCAAGA |
| ENSG00000077147 | UACAAAG |
| ENSG00000077147 | UAUUACC |
| ENSG00000077157 | AAAAAUC |
| ENSG00000077157 | AAAGUGC |

|                 |         |
|-----------------|---------|
| ENSG00000077157 | ACCCAUU |
| ENSG00000077157 | ACUGUUU |
| ENSG00000077157 | AGCAGCA |
| ENSG00000077157 | AGGUAGU |
| ENSG00000077157 | CAGCUGG |
| ENSG00000077157 | CUCCAGC |
| ENSG00000077157 | CUGCAGC |
| ENSG00000077157 | GAGGCAG |
| ENSG00000077157 | GAGGUAG |
| ENSG00000077157 | GCUUCCU |
| ENSG00000077157 | GGAGAGA |
| ENSG00000077157 | GGCAAGA |
| ENSG00000077157 | GGGUCC  |
| ENSG00000077157 | GUGACAG |
| ENSG00000077157 | UAAUAUC |
| ENSG00000077157 | UCACAAG |
| ENSG00000077157 | UGCAUUA |
| ENSG00000077157 | UUCAAAU |
| ENSG00000077157 | UUCUGCA |
| ENSG00000077254 | AGUGCAA |
| ENSG00000077254 | CAAAACU |
| ENSG00000077254 | CUACAAA |
| ENSG00000077254 | GUGCAAA |
| ENSG00000077254 | UACAAAG |
| ENSG00000077274 | AACAAAC |
| ENSG00000077274 | ACUGGCU |
| ENSG00000077274 | AGCAGCA |
| ENSG00000077274 | AGCAGCU |
| ENSG00000077274 | AGGAGCU |
| ENSG00000077274 | CAGGCUC |
| ENSG00000077274 | CAUGGAU |
| ENSG00000077274 | CUCCAC  |
| ENSG00000077274 | CUGACUC |
| ENSG00000077274 | GAAGGUC |
| ENSG00000077274 | GAGUGUG |
| ENSG00000077274 | GGAGGAG |
| ENSG00000077274 | GGAGGCA |
| ENSG00000077274 | GGUGGUU |
| ENSG00000077274 | UCACAUU |
| ENSG00000077274 | UCUCAAG |
| ENSG00000077274 | UGCAGCU |
| ENSG00000077274 | UGGGGGA |
| ENSG00000077274 | UGUGUGG |
| ENSG00000077274 | UUGAUCA |
| ENSG00000077279 | AAAUUUC |
| ENSG00000077279 | AACACUG |
| ENSG00000077279 | AACAUUC |
| ENSG00000077279 | AACCUGU |
| ENSG00000077279 | AACUACU |
| ENSG00000077279 | AAUCCUU |
| ENSG00000077279 | AAUUUUA |
| ENSG00000077279 | ACCUGGA |
| ENSG00000077279 | AGAUAAA |
| ENSG00000077279 | AUAUUUA |
| ENSG00000077279 | AUCCCUU |
| ENSG00000077279 | AUCCUUG |
| ENSG00000077279 | AUCCUUU |
| ENSG00000077279 | AUGGCAC |
| ENSG00000077279 | AUUGCAC |
| ENSG00000077279 | CAAAGCA |
| ENSG00000077279 | CAAGAGC |
| ENSG00000077279 | CACAGGG |
| ENSG00000077279 | CACCAGC |
| ENSG00000077279 | CCCUGUU |

|                 |          |
|-----------------|----------|
| ENSG00000077279 | CUAGGCU  |
| ENSG00000077279 | CUCACAC  |
| ENSG00000077279 | CUGGACU  |
| ENSG00000077279 | GAAUUGU  |
| ENSG00000077279 | GACCCUG  |
| ENSG00000077279 | GCAGAAG  |
| ENSG00000077279 | GCCCUGU  |
| ENSG00000077279 | GCUACAU  |
| ENSG00000077279 | GGAUUUC  |
| ENSG00000077279 | GGCAGUG  |
| ENSG00000077279 | GGGAGCU  |
| ENSG00000077279 | GGGGAGC  |
| ENSG00000077279 | GGUGGGC  |
| ENSG00000077279 | GUAAACA  |
| ENSG00000077279 | GUGACAG  |
| ENSG00000077279 | GUGCUUG  |
| ENSG00000077279 | UCCCUUU  |
| ENSG00000077279 | UCUAGAG  |
| ENSG00000077279 | UCUCACC  |
| ENSG00000077279 | UCUCCAA  |
| ENSG00000077279 | UGAGAAU  |
| ENSG00000077279 | UGCAAAG  |
| ENSG00000077279 | UGCCCG   |
| ENSG00000077279 | UGGAGAU  |
| ENSG00000077279 | UGUCUGG  |
| ENSG00000077279 | UGUCUUU  |
| ENSG00000077279 | UGUGCUU  |
| ENSG00000077279 | UUCAAGC  |
| ENSG00000077279 | UUCUAAU  |
| ENSG00000077279 | UUCUUGU  |
| ENSG00000077279 | UUGAUC   |
| ENSG00000077279 | UUUGCAA  |
| ENSG00000077279 | UUUGCAC  |
| ENSG00000077279 | UUUUUGC  |
| ENSG00000077327 | AUAUUAU  |
| ENSG00000077327 | GUGAAUG  |
| ENSG00000077454 | AAGGCAC  |
| ENSG00000077454 | AGCAGCG  |
| ENSG00000077454 | AGGAUGU  |
| ENSG00000077454 | CCAGCAU  |
| ENSG00000077454 | CCAGGAG  |
| ENSG00000077454 | CUCUUCC  |
| ENSG00000077454 | CUUUGGU  |
| ENSG00000077454 | GAGGCUG  |
| ENSG00000077454 | GGGCCCC  |
| ENSG00000077454 | GGUGGGC  |
| ENSG00000077454 | UGUCUUU  |
| ENSG00000077458 | ACAAUUAU |
| ENSG00000077458 | ACUGUAG  |
| ENSG00000077458 | AGAUGUG  |
| ENSG00000077458 | AGCAUUC  |
| ENSG00000077458 | AGUAGUU  |
| ENSG00000077458 | AUUGCAC  |
| ENSG00000077458 | CACAGGG  |
| ENSG00000077458 | UAUUGCU  |
| ENSG00000077458 | UGAAGUG  |
| ENSG00000077458 | UGCAUUAU |
| ENSG00000077514 | GUGCUUG  |
| ENSG00000077514 | UGUGCUU  |
| ENSG00000077522 | CUUUGGU  |
| ENSG00000077585 | AGCAUUC  |
| ENSG00000077585 | AGUACUG  |
| ENSG00000077585 | AUGCAUU  |
| ENSG00000077585 | UAUAAAG  |

|                 |          |
|-----------------|----------|
| ENSG00000077585 | UUAUGCA  |
| ENSG00000077684 | AGCAUUC  |
| ENSG00000077684 | AUAAUAC  |
| ENSG00000077684 | AUGGCUU  |
| ENSG00000077684 | AUUGCAC  |
| ENSG00000077684 | CAAAACU  |
| ENSG00000077684 | CCUUCAU  |
| ENSG00000077684 | GGAAGAC  |
| ENSG00000077684 | GGCUCUG  |
| ENSG00000077684 | GUGCUUG  |
| ENSG00000077684 | UAAGACU  |
| ENSG00000077684 | UAUAAAAG |
| ENSG00000077684 | UCACAUU  |
| ENSG00000077684 | UCUCACC  |
| ENSG00000077684 | UGAAAGG  |
| ENSG00000077684 | UGACAUC  |
| ENSG00000077684 | UGCAAAG  |
| ENSG00000077684 | UGCAUAG  |
| ENSG00000077684 | UGCAUUAU |
| ENSG00000077684 | UGCUGAC  |
| ENSG00000077684 | UUCUUGU  |
| ENSG00000077684 | UUGACAC  |
| ENSG00000077684 | UUGAUCA  |
| ENSG00000077713 | AUCCUUU  |
| ENSG00000077713 | UCACAGG  |
| ENSG00000077713 | UGAUCCA  |
| ENSG00000077782 | AAAAGUA  |
| ENSG00000077782 | AAACUGU  |
| ENSG00000077782 | AAGACAU  |
| ENSG00000077782 | AAGUAGC  |
| ENSG00000077782 | AAUCUCU  |
| ENSG00000077782 | ACCAGCA  |
| ENSG00000077782 | ACUCAGC  |
| ENSG00000077782 | ACUCAGG  |
| ENSG00000077782 | CCAGGAG  |
| ENSG00000077782 | CCCCAG   |
| ENSG00000077782 | CCUGAG   |
| ENSG00000077782 | CUCUGGG  |
| ENSG00000077782 | GGCAGGG  |
| ENSG00000077782 | GGGCCCC  |
| ENSG00000077782 | UAAUAUC  |
| ENSG00000077782 | UAUAUGA  |
| ENSG00000077782 | UCAUACA  |
| ENSG00000077782 | UCAUAGA  |
| ENSG00000077782 | UCCUGAG  |
| ENSG00000077782 | UGAGGAC  |
| ENSG00000077782 | UGGUACC  |
| ENSG00000077782 | UUGGUCC  |
| ENSG00000077782 | UUGUGUC  |
| ENSG00000077809 | AUAUUAU  |
| ENSG00000077809 | CAUGGAU  |
| ENSG00000077809 | CUACAAA  |
| ENSG00000077809 | CUUCUCU  |
| ENSG00000077809 | GAGGUAG  |
| ENSG00000077809 | GAGGUUAU |
| ENSG00000077809 | GUCACUC  |
| ENSG00000077809 | UCACAGU  |
| ENSG00000077809 | UGAAAGG  |
| ENSG00000077809 | UGUAUAA  |
| ENSG00000077809 | UUGAGGC  |
| ENSG00000078018 | AAAGUUU  |
| ENSG00000078018 | ACUGUGU  |
| ENSG00000078018 | CAAGAGC  |
| ENSG00000078018 | CUAUACA  |

|                 |         |
|-----------------|---------|
| ENSG00000078018 | UGGCCAC |
| ENSG00000078018 | UUUGCAC |
| ENSG00000078053 | AUGACAC |
| ENSG00000078053 | CAAAGCA |
| ENSG00000078061 | GAGGCAG |
| ENSG00000078061 | GUGCUUG |
| ENSG00000078061 | UGGAGAU |
| ENSG00000078061 | UGUGCUU |
| ENSG00000078081 | AAGUUGU |
| ENSG00000078081 | CUGGCUC |
| ENSG00000078081 | GGCUCUG |
| ENSG00000078081 | UCUGGAG |
| ENSG00000078098 | ACAGGUG |
| ENSG00000078114 | AAAUUUC |
| ENSG00000078114 | AACAAAC |
| ENSG00000078114 | AAGGCAC |
| ENSG00000078114 | AGCACCA |
| ENSG00000078114 | CUUUGGU |
| ENSG00000078114 | GUGACAG |
| ENSG00000078114 | UAAUAGU |
| ENSG00000078114 | UCUCAAG |
| ENSG00000078114 | UGCAUAG |
| ENSG00000078114 | UGCAUAU |
| ENSG00000078114 | UGUGCUU |
| ENSG00000078140 | AAGAACC |
| ENSG00000078140 | AAGUAGC |
| ENSG00000078140 | AAUUUUA |
| ENSG00000078140 | AGCACCA |
| ENSG00000078140 | AGCAGCU |
| ENSG00000078140 | CAAAACU |
| ENSG00000078140 | CAAAGCA |
| ENSG00000078140 | CACAGGG |
| ENSG00000078140 | CACAGUG |
| ENSG00000078140 | CAGCAGA |
| ENSG00000078140 | GAAACAU |
| ENSG00000078140 | GCACCAU |
| ENSG00000078140 | GCAGAAG |
| ENSG00000078140 | GGCAAGA |
| ENSG00000078140 | GUAAACA |
| ENSG00000078140 | UAUUGCU |
| ENSG00000078140 | UCACACA |
| ENSG00000078140 | UCUCCAA |
| ENSG00000078140 | UGAGAAG |
| ENSG00000078140 | UGUGUCA |
| ENSG00000078140 | UUGGCAA |
| ENSG00000078140 | UUGGCAC |
| ENSG00000078237 | AAAUCCC |
| ENSG00000078237 | AUCCCUU |
| ENSG00000078237 | CCAGUGC |
| ENSG00000078237 | UCCCUUU |
| ENSG00000078246 | UCUCAAG |
| ENSG00000078269 | UCUCCAA |
| ENSG00000078269 | UGUCUUU |
| ENSG00000078295 | AACUGGU |
| ENSG00000078295 | AAUACUG |
| ENSG00000078295 | AGUGCAA |
| ENSG00000078295 | AUGCACC |
| ENSG00000078295 | CAGUGCA |
| ENSG00000078295 | GAGGCAG |
| ENSG00000078295 | GCACCAU |
| ENSG00000078295 | UACAAAG |
| ENSG00000078295 | UAUCAGA |
| ENSG00000078295 | UAUUGCU |
| ENSG00000078295 | UCCUGAG |



|                 |          |
|-----------------|----------|
| ENSG00000078295 | UGAGGAC  |
| ENSG00000078295 | UGUGCUU  |
| ENSG00000078295 | UUGGCAA  |
| ENSG00000078304 | AAUACUG  |
| ENSG00000078304 | ACUGGCC  |
| ENSG00000078304 | AGCAGCA  |
| ENSG00000078304 | CCCUGAG  |
| ENSG00000078304 | GCAGCAU  |
| ENSG00000078304 | GUAUGUU  |
| ENSG00000078304 | UAUUGCU  |
| ENSG00000078304 | UGGCCAC  |
| ENSG00000078369 | AGGUUUAU |
| ENSG00000078369 | CUACAGU  |
| ENSG00000078369 | GCAUCCC  |
| ENSG00000078369 | GUGCUUG  |
| ENSG00000078369 | UAUUACC  |
| ENSG00000078369 | UGUGCUU  |
| ENSG00000078369 | UUUCAAC  |
| ENSG00000078399 | AAAGGUA  |
| ENSG00000078399 | CUAUACA  |
| ENSG00000078399 | GAGGUAG  |
| ENSG00000078399 | GAGGUAU  |
| ENSG00000078399 | GUGCAA   |
| ENSG00000078399 | UUGGUCC  |
| ENSG00000078401 | AGUGCAA  |
| ENSG00000078401 | GGUAGAC  |
| ENSG00000078401 | GUGAGGU  |
| ENSG00000078403 | AAAAAUC  |
| ENSG00000078403 | AGUGCAA  |
| ENSG00000078403 | CAGCAGG  |
| ENSG00000078403 | CUACAGU  |
| ENSG00000078403 | GAGGUAG  |
| ENSG00000078403 | GAGGUAU  |
| ENSG00000078403 | UACAAAG  |
| ENSG00000078403 | UCACAAG  |
| ENSG00000078618 | ACUGCAG  |
| ENSG00000078674 | AACACUG  |
| ENSG00000078674 | AAGACAU  |
| ENSG00000078674 | ACAUCAC  |
| ENSG00000078674 | CACAGUG  |
| ENSG00000078674 | CAGUCUG  |
| ENSG00000078699 | AAAUGGU  |
| ENSG00000078699 | ACAUUCA  |
| ENSG00000078699 | AGCAAAA  |
| ENSG00000078699 | AUGCACC  |
| ENSG00000078699 | CAAAGCA  |
| ENSG00000078699 | CAGCAGA  |
| ENSG00000078699 | CCUGCUG  |
| ENSG00000078699 | CUACAGU  |
| ENSG00000078699 | CUGGAAA  |
| ENSG00000078699 | CUUUGGU  |
| ENSG00000078699 | GACUUCC  |
| ENSG00000078699 | GAGCUGC  |
| ENSG00000078699 | GCCUGGA  |
| ENSG00000078699 | GCUGGUG  |
| ENSG00000078699 | GGAGGAG  |
| ENSG00000078699 | GGGAGCU  |
| ENSG00000078699 | GGGAGC   |
| ENSG00000078699 | GUGCAA   |
| ENSG00000078699 | UCCUAUA  |
| ENSG00000078699 | UGGCCAC  |
| ENSG00000078699 | UUAUGCA  |
| ENSG00000078747 | AAGACAU  |
| ENSG00000078747 | AAGUGCA  |

|                 |         |
|-----------------|---------|
| ENSG00000078747 | AGAUGUG |
| ENSG00000078747 | AGUGCUG |
| ENSG00000078747 | CAAAGUG |
| ENSG00000078747 | CAGCAGG |
| ENSG00000078747 | CCAGUGU |
| ENSG00000078747 | CUUGGGC |
| ENSG00000078747 | GUGCAA  |
| ENSG00000078747 | UAGGGCC |
| ENSG00000078747 | UGGAGAU |
| ENSG00000078747 | UGGGAUC |
| ENSG00000078804 | AAAAAUC |
| ENSG00000078804 | AAGGCAC |
| ENSG00000078804 | AAGUGCU |
| ENSG00000078804 | AAUUUUA |
| ENSG00000078804 | ACACACC |
| ENSG00000078804 | ACACACU |
| ENSG00000078804 | ACAGUAC |
| ENSG00000078804 | ACAGUAU |
| ENSG00000078804 | AGUGCUG |
| ENSG00000078804 | AUAUUAU |
| ENSG00000078804 | CAAGAGC |
| ENSG00000078804 | CUAUACA |
| ENSG00000078804 | GAGCCCC |
| ENSG00000078804 | GAGCCCU |
| ENSG00000078804 | GCUACAU |
| ENSG00000078804 | GCUGGUG |
| ENSG00000078804 | GGGGAGC |
| ENSG00000078804 | GGUGGUU |
| ENSG00000078804 | GUAGUGU |
| ENSG00000078804 | GUCUGCC |
| ENSG00000078804 | UCAAGUA |
| ENSG00000078804 | UCUCCAA |
| ENSG00000078804 | UGAAAGG |
| ENSG00000078804 | UGAGUCU |
| ENSG00000078804 | UGCAUAG |
| ENSG00000078804 | UGCAUAU |
| ENSG00000078804 | UGUCUGC |
| ENSG00000078804 | UUGGCAA |
| ENSG00000078967 | GUGAAUG |
| ENSG00000078967 | UUGGCAA |
| ENSG00000078967 | UUGGCAC |
| ENSG00000079102 | AAAUCCC |
| ENSG00000079102 | AAUCUCU |
| ENSG00000079102 | ACUGGA  |
| ENSG00000079102 | ACUGCAG |
| ENSG00000079102 | ACUGGCU |
| ENSG00000079102 | AGGGAGG |
| ENSG00000079102 | AUAAAGU |
| ENSG00000079102 | AUAUUAU |
| ENSG00000079102 | CAAAGUG |
| ENSG00000079102 | CACAGGG |
| ENSG00000079102 | CAGCUGG |
| ENSG00000079102 | CUGCAGG |
| ENSG00000079102 | CUGUUGA |
| ENSG00000079102 | CUUCACC |
| ENSG00000079102 | GAGAACU |
| ENSG00000079102 | GGAGGAG |
| ENSG00000079102 | GGAUGAG |
| ENSG00000079102 | GGGUCUU |
| ENSG00000079102 | GUCUACU |
| ENSG00000079102 | GUUAAUG |
| ENSG00000079102 | UCACAGG |
| ENSG00000079102 | UGACCUA |
| ENSG00000079102 | UUGUGAC |

|                 |          |
|-----------------|----------|
| ENSG00000079102 | UUUUUGC  |
| ENSG00000079112 | AACAUUC  |
| ENSG00000079112 | UUCAAAU  |
| ENSG00000079150 | UGCAAAG  |
| ENSG00000079150 | UUUGCAA  |
| ENSG00000079156 | GAAACAU  |
| ENSG00000079156 | UGCAUAG  |
| ENSG00000079215 | AAAGUAA  |
| ENSG00000079215 | CAGUCCA  |
| ENSG00000079215 | GGGAGCU  |
| ENSG00000079215 | UACAAAG  |
| ENSG00000079246 | UAUAAAAG |
| ENSG00000079277 | AGCAGCG  |
| ENSG00000079277 | AGCAGCU  |
| ENSG00000079277 | CAAAGUG  |
| ENSG00000079277 | GGAAGAC  |
| ENSG00000079277 | UGCAAAG  |
| ENSG00000079277 | UUAUGCA  |
| ENSG00000079308 | AAAGUAA  |
| ENSG00000079308 | AAAGUAC  |
| ENSG00000079308 | AAAGUGC  |
| ENSG00000079308 | AAGUGCU  |
| ENSG00000079308 | AGCUUUAU |
| ENSG00000079308 | AGUGCUU  |
| ENSG00000079308 | AUAUAAC  |
| ENSG00000079308 | AUAUUAU  |
| ENSG00000079308 | AUGUCUG  |
| ENSG00000079308 | CCUUCUU  |
| ENSG00000079308 | CUUUGGU  |
| ENSG00000079308 | GAGACCU  |
| ENSG00000079308 | GAGGCAG  |
| ENSG00000079308 | GGCAUUG  |
| ENSG00000079308 | GGCUCAG  |
| ENSG00000079308 | GGGAGCU  |
| ENSG00000079308 | UACAAAG  |
| ENSG00000079308 | UUCUUGU  |
| ENSG00000079308 | UUGGCAA  |
| ENSG00000079308 | UUGGCAC  |
| ENSG00000079313 | ACUGUUU  |
| ENSG00000079313 | CACUGUU  |
| ENSG00000079313 | UAUUGCU  |
| ENSG00000079332 | AAAACUG  |
| ENSG00000079332 | AAUCACU  |
| ENSG00000079332 | CACCACC  |
| ENSG00000079332 | CCAGUGC  |
| ENSG00000079332 | CCAGUGU  |
| ENSG00000079332 | CUCCAGC  |
| ENSG00000079332 | CUGGACU  |
| ENSG00000079332 | GAGAAGA  |
| ENSG00000079332 | GAGACGC  |
| ENSG00000079332 | GGAGAGA  |
| ENSG00000079332 | GUCCAGA  |
| ENSG00000079332 | GUGCAAA  |
| ENSG00000079332 | UCACAAG  |
| ENSG00000079332 | UCACCAC  |
| ENSG00000079332 | UCUCCAA  |
| ENSG00000079335 | ACAGUAC  |
| ENSG00000079335 | ACAGUAU  |
| ENSG00000079335 | CAGUAGU  |
| ENSG00000079335 | CUAUACA  |
| ENSG00000079335 | GCAGCAU  |
| ENSG00000079335 | UCCCUCU  |
| ENSG00000079335 | UCCCUUU  |
| ENSG00000079337 | CACAGGG  |

|                 |         |
|-----------------|---------|
| ENSG00000079337 | CUCCAGC |
| ENSG00000079385 | CAGUUAC |
| ENSG00000079385 | GUAAACA |
| ENSG00000079387 | AAAAGUA |
| ENSG00000079387 | AAAGUAU |
| ENSG00000079387 | ACAUAGA |
| ENSG00000079387 | ACAUUCA |
| ENSG00000079387 | AGAUGUG |
| ENSG00000079387 | AGCACCA |
| ENSG00000079387 | AGCAGCU |
| ENSG00000079387 | AGCCCUU |
| ENSG00000079387 | AUGACAC |
| ENSG00000079387 | CAGUUAC |
| ENSG00000079387 | CUCUUCC |
| ENSG00000079387 | GAAACAU |
| ENSG00000079387 | GAGCCCU |
| ENSG00000079387 | GAGGCUG |
| ENSG00000079387 | GCUGGAU |
| ENSG00000079387 | GGAGUGU |
| ENSG00000079387 | GGGUCUU |
| ENSG00000079387 | GGUGGUC |
| ENSG00000079387 | GUGAAUG |
| ENSG00000079387 | UCACAGG |
| ENSG00000079387 | UCACAGU |
| ENSG00000079387 | UCCAGUU |
| ENSG00000079387 | UCCUGU  |
| ENSG00000079387 | UGCAAAG |
| ENSG00000079387 | UGGGAUC |
| ENSG00000079387 | UGUGCUU |
| ENSG00000079387 | UUCCUAG |
| ENSG00000079387 | UUUGCAA |
| ENSG00000079432 | AAAGUAC |
| ENSG00000079432 | AAAGUGC |
| ENSG00000079432 | AACCUUG |
| ENSG00000079432 | AACCUGU |
| ENSG00000079432 | AAGUGCA |
| ENSG00000079432 | AAUCUCA |
| ENSG00000079432 | AAUCUCU |
| ENSG00000079432 | AGGUUAU |
| ENSG00000079432 | AUAAAGU |
| ENSG00000079432 | AUGGCUU |
| ENSG00000079432 | CAAAGUG |
| ENSG00000079432 | CCUUCUU |
| ENSG00000079432 | CUCCAGC |
| ENSG00000079432 | CUCGGCG |
| ENSG00000079432 | CUCUGGG |
| ENSG00000079432 | GAGCCCC |
| ENSG00000079432 | GCAGGAC |
| ENSG00000079432 | GUGGCCC |
| ENSG00000079432 | UCCUGU  |
| ENSG00000079435 | AAGGCAC |
| ENSG00000079435 | AGCAGCA |
| ENSG00000079482 | AAGUCAC |
| ENSG00000079482 | AAGUGUG |
| ENSG00000079482 | GAGCUGC |
| ENSG00000079482 | UCCUAUA |
| ENSG00000079482 | UUGGCAA |
| ENSG00000079557 | UCACCAC |
| ENSG00000079689 | GAGUCUU |
| ENSG00000079691 | GUGCAAA |
| ENSG00000079691 | UCAAGUA |
| ENSG00000079739 | AAGGCAC |
| ENSG00000079805 | AAAGUGC |
| ENSG00000079805 | AAGGCAC |

|                 |         |
|-----------------|---------|
| ENSG00000079805 | AAGUGCA |
| ENSG00000079805 | AGUGCAA |
| ENSG00000079805 | CAAAGUG |
| ENSG00000079805 | CUUACAG |
| ENSG00000079805 | UAAUAGU |
| ENSG00000079805 | UCCCUUG |
| ENSG00000079819 | AGCAAAA |
| ENSG00000079819 | CUAUACA |
| ENSG00000079819 | UCUGGAA |
| ENSG00000079841 | AAAAACC |
| ENSG00000079841 | AAAAAUC |
| ENSG00000079841 | AAACUGU |
| ENSG00000079841 | AAGACAU |
| ENSG00000079841 | AGCCCUU |
| ENSG00000079841 | AUAAAGU |
| ENSG00000079841 | AUGGCUU |
| ENSG00000079841 | AUGUCUG |
| ENSG00000079841 | CACAGGG |
| ENSG00000079841 | CCAGUGC |
| ENSG00000079841 | CCAGUGU |
| ENSG00000079841 | GAAGGAA |
| ENSG00000079841 | GAUUGUA |
| ENSG00000079841 | GCAGAAG |
| ENSG00000079841 | GCCUGGG |
| ENSG00000079841 | GUGCUUG |
| ENSG00000079841 | UAAGACG |
| ENSG00000079841 | UCACAAG |
| ENSG00000079841 | UCAUUUG |
| ENSG00000079841 | UGCAGCU |
| ENSG00000079841 | UGUGCUU |
| ENSG00000079931 | CUACAAA |
| ENSG00000080189 | CAGGUGA |
| ENSG00000080189 | UCACACA |
| ENSG00000080345 | AUACAAG |
| ENSG00000080345 | UAUAAAG |
| ENSG00000080371 | AGAUAAA |
| ENSG00000080371 | GUCUCUG |
| ENSG00000080371 | GUGCAAA |
| ENSG00000080371 | UACAAAG |
| ENSG00000080371 | UGCAUAU |
| ENSG00000080371 | UUUGCAC |
| ENSG00000080493 | AAAGUGC |
| ENSG00000080493 | AAUACUG |
| ENSG00000080493 | ACAGUAC |
| ENSG00000080493 | ACAGUAU |
| ENSG00000080493 | ACUGCAU |
| ENSG00000080493 | AGCAGCG |
| ENSG00000080493 | AGCAGCU |
| ENSG00000080493 | AGCCCUU |
| ENSG00000080493 | AUAAAGU |
| ENSG00000080493 | CAAAACU |
| ENSG00000080493 | CAGCAGA |
| ENSG00000080493 | CAGCAGG |
| ENSG00000080493 | CCUGCUG |
| ENSG00000080493 | CUGCAGG |
| ENSG00000080493 | GAAGGAA |
| ENSG00000080493 | GAGGCAG |
| ENSG00000080493 | GAGGUAG |
| ENSG00000080493 | GAGUUGA |
| ENSG00000080493 | GAGUUGG |
| ENSG00000080493 | GCAGGAC |
| ENSG00000080493 | GCAGGUU |
| ENSG00000080493 | GCUACAU |
| ENSG00000080493 | GGAAGAC |

|                |          |
|----------------|----------|
| ENSG0000080493 | GGCAGCG  |
| ENSG0000080493 | GGCUCUG  |
| ENSG0000080493 | GUGACUG  |
| ENSG0000080493 | UAGGCCG  |
| ENSG0000080493 | UCCUUU   |
| ENSG0000080493 | UGCAUUAU |
| ENSG0000080493 | UGGGACA  |
| ENSG0000080493 | UUCAAGC  |
| ENSG0000080493 | UUCUAAU  |
| ENSG0000080493 | UUGUUCG  |
| ENSG0000080503 | AAGACAU  |
| ENSG0000080503 | AAUUUUA  |
| ENSG0000080503 | ACAAUUAU |
| ENSG0000080503 | CACAGUG  |
| ENSG0000080503 | CAGGCUC  |
| ENSG0000080503 | CUACAAA  |
| ENSG0000080503 | UGCAAAG  |
| ENSG0000080503 | UCCAUA   |
| ENSG0000080546 | AGCAGCA  |
| ENSG0000080546 | AUGGCAC  |
| ENSG0000080573 | AGGCAGG  |
| ENSG0000080573 | AGUGCUU  |
| ENSG0000080573 | CCAGUGU  |
| ENSG0000080573 | GCACCAU  |
| ENSG0000080573 | UAAUACA  |
| ENSG0000080573 | UUAGGAU  |
| ENSG0000080573 | UUGGUCC  |
| ENSG0000080603 | AACACUG  |
| ENSG0000080603 | CUUUGGU  |
| ENSG0000080603 | GUGGGGA  |
| ENSG0000080644 | GUCUCUG  |
| ENSG0000080644 | UCAUUUG  |
| ENSG0000080709 | AAGUGCA  |
| ENSG0000080709 | ACAAUUAU |
| ENSG0000080709 | AUGAUGA  |
| ENSG0000080709 | AUGAUGC  |
| ENSG0000080709 | GACCAUG  |
| ENSG0000080709 | UGACAUC  |
| ENSG0000080802 | AAAGCUG  |
| ENSG0000080802 | AAUACUG  |
| ENSG0000080802 | AGGUUAU  |
| ENSG0000080802 | GUCCAGA  |
| ENSG0000080815 | AGUGCUU  |
| ENSG0000080815 | CAGUGCA  |
| ENSG0000080815 | CUUUGGU  |
| ENSG0000080815 | GUGCUUG  |
| ENSG0000080815 | UCCUGAG  |
| ENSG0000080815 | UGAGAAU  |
| ENSG0000080819 | AAGGCAC  |
| ENSG0000080819 | AAUCUCU  |
| ENSG0000080822 | AAGGCAC  |
| ENSG0000080822 | UAUAAAG  |
| ENSG0000080824 | AACAAAC  |
| ENSG0000080824 | GAAAACA  |
| ENSG0000080845 | AAAAAUC  |
| ENSG0000080845 | AAAGCUG  |
| ENSG0000080845 | AGCCCUU  |
| ENSG0000080845 | AGGGAGG  |
| ENSG0000080845 | AUGUGCC  |
| ENSG0000080845 | CACACCU  |
| ENSG0000080845 | CUCUAGC  |
| ENSG0000080845 | CUUGUAU  |
| ENSG0000080845 | GAAGGAA  |
| ENSG0000080845 | GAGGGGC  |

|                |          |
|----------------|----------|
| ENSG0000080845 | GAGGUAG  |
| ENSG0000080845 | UCACACA  |
| ENSG0000080845 | UGCAGCU  |
| ENSG0000080845 | UGCAUUAU |
| ENSG0000080854 | AACACUG  |
| ENSG0000080854 | ACCAGCA  |
| ENSG0000080854 | AGCCUGC  |
| ENSG0000080854 | CUGCAGC  |
| ENSG0000080854 | GAGCUGC  |
| ENSG0000080854 | GCAGCAU  |
| ENSG0000080854 | GCCUGGA  |
| ENSG0000080854 | UCUCCAA  |
| ENSG0000080854 | UGCAAAG  |
| ENSG0000081014 | ACUGUGU  |
| ENSG0000081014 | AGCACCA  |
| ENSG0000081014 | AUGUAAU  |
| ENSG0000081014 | CUCCAC   |
| ENSG0000081014 | UUGGCAC  |
| ENSG0000081019 | AAAGUAA  |
| ENSG0000081019 | AAAUGGU  |
| ENSG0000081019 | AAUCACU  |
| ENSG0000081019 | ACAAUUAU |
| ENSG0000081019 | ACAUUAC  |
| ENSG0000081019 | CACAGUG  |
| ENSG0000081019 | GAGAAGA  |
| ENSG0000081019 | GCUGGAU  |
| ENSG0000081019 | UAAUACA  |
| ENSG0000081019 | UAUAAAG  |
| ENSG0000081019 | UCAUGAU  |
| ENSG0000081019 | UCCUGAG  |
| ENSG0000081019 | UGAGAAG  |
| ENSG0000081019 | UGCAUAG  |
| ENSG0000081019 | UGCAUUAU |
| ENSG0000081026 | AAGACAU  |
| ENSG0000081026 | AAGUCUU  |
| ENSG0000081026 | AGUGCUU  |
| ENSG0000081026 | CAGUAGA  |
| ENSG0000081026 | CCUUCAU  |
| ENSG0000081026 | GUAAACA  |
| ENSG0000081026 | UUGGCAC  |
| ENSG0000081041 | AAGACAU  |
| ENSG0000081041 | CACAGUG  |
| ENSG0000081051 | CUCUUCC  |
| ENSG0000081052 | AAUUAUU  |
| ENSG0000081052 | AUGCAUU  |
| ENSG0000081052 | CUCCAA   |
| ENSG0000081052 | CUCCAC   |
| ENSG0000081052 | CUGCAGG  |
| ENSG0000081052 | GACUUCC  |
| ENSG0000081052 | GAGAAAU  |
| ENSG0000081052 | GCCCUUA  |
| ENSG0000081052 | GGGGAGC  |
| ENSG0000081052 | GUGAAUG  |
| ENSG0000081052 | UAAUAUC  |
| ENSG0000081052 | UCCUGU   |
| ENSG0000081052 | UUCAAGC  |
| ENSG0000081052 | UUGUGAC  |
| ENSG0000081052 | UUUCAAC  |
| ENSG0000081059 | AUGCAUU  |
| ENSG0000081059 | CUGCAGG  |
| ENSG0000081059 | GACCUGG  |
| ENSG0000081059 | GAGGCUG  |
| ENSG0000081059 | GUGGGGA  |
| ENSG0000081059 | UGAAGCU  |

|                |          |
|----------------|----------|
| ENSG0000081087 | AAAAGUA  |
| ENSG0000081087 | AAGUGCU  |
| ENSG0000081087 | AGUGCUU  |
| ENSG0000081087 | AGUGGUU  |
| ENSG0000081087 | CAGUUAC  |
| ENSG0000081087 | GUAAACA  |
| ENSG0000081087 | UAUUGCU  |
| ENSG0000081154 | AAAGGUA  |
| ENSG0000081154 | GAGCUAA  |
| ENSG0000081189 | AAAGUAC  |
| ENSG0000081189 | AACAAAC  |
| ENSG0000081189 | AAGUGCU  |
| ENSG0000081189 | ACACACU  |
| ENSG0000081189 | ACUGUUU  |
| ENSG0000081189 | AGUGCUU  |
| ENSG0000081189 | AUAU AAC |
| ENSG0000081189 | AUGGCUU  |
| ENSG0000081189 | AUGUAAU  |
| ENSG0000081189 | CGACCCA  |
| ENSG0000081189 | GAGGCAG  |
| ENSG0000081189 | GCAGGUU  |
| ENSG0000081189 | GUAACAG  |
| ENSG0000081189 | GUUAAUG  |
| ENSG0000081189 | UAAUAUC  |
| ENSG0000081189 | UCAACAG  |
| ENSG0000081189 | UCACAGG  |
| ENSG0000081189 | UCACAGU  |
| ENSG0000081189 | UGCAUAG  |
| ENSG0000081189 | UUCAAAU  |
| ENSG0000081237 | UCUUGAG  |
| ENSG0000081277 | AAUACUG  |
| ENSG0000081277 | CUGCAGG  |
| ENSG0000081377 | AAAAGUA  |
| ENSG0000081377 | AAAGUAC  |
| ENSG0000081377 | AAGGCAC  |
| ENSG0000081377 | ACUGCAG  |
| ENSG0000081377 | AUACAAG  |
| ENSG0000081377 | CAA AUGC |
| ENSG0000081377 | CACAGUG  |
| ENSG0000081377 | CCCUGAG  |
| ENSG0000081377 | CCUUCAU  |
| ENSG0000081377 | CUUUGGU  |
| ENSG0000081377 | GAGGUAG  |
| ENSG0000081377 | UCACAGU  |
| ENSG0000081377 | UGCCUG   |
| ENSG0000081377 | UGUGCUU  |
| ENSG0000081479 | ACAGUAU  |
| ENSG0000081479 | AUAAAGU  |
| ENSG0000081479 | AUGUGCC  |
| ENSG0000081479 | CAGUAGA  |
| ENSG0000081479 | UACAAAG  |
| ENSG0000081479 | UCCUUG   |
| ENSG0000081479 | UGCAAAG  |
| ENSG0000081791 | GUCUCUG  |
| ENSG0000081791 | UCACACA  |
| ENSG0000081791 | UCUCACC  |
| ENSG0000081800 | GUUAAUG  |
| ENSG0000081803 | ACAUCAC  |
| ENSG0000081803 | ACUGCAG  |
| ENSG0000081803 | AUACAAG  |
| ENSG0000081803 | CUAGUCC  |
| ENSG0000081803 | GGCAUUG  |
| ENSG0000081803 | GGGUUUA  |
| ENSG0000081803 | UAUUGCU  |



|                 |         |
|-----------------|---------|
| ENSG00000081842 | AAAGAAU |
| ENSG00000081842 | AAGUGCA |
| ENSG00000081842 | AGCAGCG |
| ENSG00000081842 | AGCAGCU |
| ENSG00000081842 | AUAAUAC |
| ENSG00000081842 | CAAAGUG |
| ENSG00000081842 | GAGGCAG |
| ENSG00000081842 | UAAUACA |
| ENSG00000081842 | UAAUAGU |
| ENSG00000081842 | UACAAAG |
| ENSG00000081842 | UAUAAUA |
| ENSG00000081842 | UCAACAG |
| ENSG00000081842 | UCACAUU |
| ENSG00000081842 | UCAUACA |
| ENSG00000081842 | UGCAUAG |
| ENSG00000081842 | UGCAUAU |
| ENSG00000081842 | UGUGCUU |
| ENSG00000081842 | UUUGCAA |
| ENSG00000081842 | UUUGCAC |
| ENSG00000081853 | AAAACUG |
| ENSG00000081853 | CACCAGC |
| ENSG00000081853 | GGAGGCA |
| ENSG00000081853 | UGCAUAG |
| ENSG00000081853 | UGGCCAC |
| ENSG00000081923 | GGAGAGA |
| ENSG00000081923 | GUAAACA |
| ENSG00000081923 | UAAUAUC |
| ENSG00000081923 | UCCCUUG |
| ENSG00000081923 | UCCCUUU |
| ENSG00000081923 | UCCUGAG |
| ENSG00000081985 | UCCCUUU |
| ENSG00000082153 | ACAGUAC |
| ENSG00000082153 | ACAGUAU |
| ENSG00000082153 | ACAUUAC |
| ENSG00000082153 | AGCCCUU |
| ENSG00000082153 | AGGACAC |
| ENSG00000082153 | AGGGAGG |
| ENSG00000082153 | AUAAAGU |
| ENSG00000082153 | AUCACUA |
| ENSG00000082153 | AUGGCAC |
| ENSG00000082153 | CCUGUAC |
| ENSG00000082153 | GCCCUUA |
| ENSG00000082153 | UACAGUU |
| ENSG00000082153 | UAUUACC |
| ENSG00000082153 | UGCAAAG |
| ENSG00000082153 | UUUGCAA |
| ENSG00000082175 | AAAGCUG |
| ENSG00000082175 | AACCUGU |
| ENSG00000082175 | CAAGAGC |
| ENSG00000082175 | GCAACUU |
| ENSG00000082175 | UCAAGUA |
| ENSG00000082175 | UCACAUU |
| ENSG00000082175 | UGUUGAA |
| ENSG00000082196 | AAGUCUU |
| ENSG00000082196 | UGCAAAG |
| ENSG00000082196 | UUCUUGU |
| ENSG00000082213 | CUGGAAA |
| ENSG00000082213 | UCUGGAA |
| ENSG00000082258 | AGCAGCU |
| ENSG00000082258 | AUGUAAU |
| ENSG00000082258 | GUAUGUU |
| ENSG00000082258 | UCAUACA |
| ENSG00000082258 | UCUCCAA |
| ENSG00000082258 | UGACCUA |

|                |         |
|----------------|---------|
| ENSG0000082258 | UGUAUGU |
| ENSG0000082269 | GAGGUAG |
| ENSG0000082269 | GAGGUAU |
| ENSG0000082293 | AAACUGU |
| ENSG0000082293 | AAAGUGC |
| ENSG0000082293 | AAGUGCA |
| ENSG0000082293 | ACCAGCA |
| ENSG0000082293 | AGUGCAA |
| ENSG0000082293 | CUUGUGU |
| ENSG0000082293 | GAGGUAU |
| ENSG0000082293 | GCACCAU |
| ENSG0000082293 | GUGCAAA |
| ENSG0000082293 | GUGCCUG |
| ENSG0000082293 | UAGGUAU |
| ENSG0000082293 | UCACAGG |
| ENSG0000082293 | UGCAAAG |
| ENSG0000082397 | AAGUUGU |
| ENSG0000082397 | UCACCAC |
| ENSG0000082397 | UUGGCAC |
| ENSG0000082438 | AAGUGCA |
| ENSG0000082458 | AAAGUAA |
| ENSG0000082458 | AACACUG |
| ENSG0000082458 | AGCAGCU |
| ENSG0000082458 | AGUGCUU |
| ENSG0000082458 | AUGAUGA |
| ENSG0000082458 | AUGGAUU |
| ENSG0000082458 | AUGUCUG |
| ENSG0000082458 | CAGGUGA |
| ENSG0000082458 | CAGUCCA |
| ENSG0000082458 | CUCCAUU |
| ENSG0000082458 | CUCUGGG |
| ENSG0000082458 | CUCUUCC |
| ENSG0000082458 | GAAGGUC |
| ENSG0000082458 | GAGCUGC |
| ENSG0000082458 | GCAACUU |
| ENSG0000082458 | GCAGGAC |
| ENSG0000082458 | GGGGUGG |
| ENSG0000082458 | GGUUUAC |
| ENSG0000082458 | GUCCAGA |
| ENSG0000082458 | GUCUCUG |
| ENSG0000082458 | UCCAGAG |
| ENSG0000082458 | UGUCUUU |
| ENSG0000082458 | UUGGUUC |
| ENSG0000082458 | UUGUUCG |
| ENSG0000082458 | UUUGCAC |
| ENSG0000082482 | CAGUCUG |
| ENSG0000082482 | UAGGUAU |
| ENSG0000082482 | UCACAGG |
| ENSG0000082497 | AGAUAAA |
| ENSG0000082497 | CCUGCUG |
| ENSG0000082512 | AAACUGU |
| ENSG0000082512 | GGUCUAG |
| ENSG0000082515 | CAAAACU |
| ENSG0000082556 | AAAAGUA |
| ENSG0000082556 | AAGACAU |
| ENSG0000082556 | ACUGCAG |
| ENSG0000082556 | AUCCCUU |
| ENSG0000082556 | CCAUUAC |
| ENSG0000082641 | AAAGCGC |
| ENSG0000082641 | AAAUCCC |
| ENSG0000082641 | ACACGGG |
| ENSG0000082641 | ACUCAA  |
| ENSG0000082641 | ACUCCAG |
| ENSG0000082641 | AGAUAAA |

|                |         |
|----------------|---------|
| ENSG0000082641 | AGCAGCA |
| ENSG0000082641 | AGCAGCG |
| ENSG0000082641 | AGCAUUC |
| ENSG0000082641 | AGCCUUU |
| ENSG0000082641 | AUGGCAC |
| ENSG0000082641 | CAAAGCA |
| ENSG0000082641 | CAGUUAC |
| ENSG0000082641 | CCCCCAG |
| ENSG0000082641 | CUCCAGC |
| ENSG0000082641 | GAGUCUU |
| ENSG0000082641 | GGCAGGG |
| ENSG0000082641 | GGCAGUG |
| ENSG0000082641 | GGGGCAG |
| ENSG0000082641 | UCCAGUU |
| ENSG0000082641 | UCUCAA  |
| ENSG0000082641 | UGAGAAG |
| ENSG0000082641 | UGUGCUU |
| ENSG0000082684 | ACUGGAU |
| ENSG0000082684 | AGCACCA |
| ENSG0000082684 | AGCAGCA |
| ENSG0000082684 | CAGCAGA |
| ENSG0000082684 | GGGGCAG |
| ENSG0000082684 | UCCUGAG |
| ENSG0000082701 | CCAGUGU |
| ENSG0000082781 | UUGGUUC |
| ENSG0000082805 | CACCAGC |
| ENSG0000082805 | CAGCAGG |
| ENSG0000082805 | GACCAUG |
| ENSG0000082805 | GAUUGGU |
| ENSG0000082805 | GGAAUGU |
| ENSG0000082805 | GGUGGGC |
| ENSG0000082805 | GUUAAUG |
| ENSG0000082898 | AAAGCUG |
| ENSG0000082898 | AAAUUUC |
| ENSG0000082898 | AAGUAGC |
| ENSG0000082898 | AUACAAG |
| ENSG0000082898 | AUGCACC |
| ENSG0000082898 | CACUCCU |
| ENSG0000082898 | CUCAAAC |
| ENSG0000082898 | GAAAACA |
| ENSG0000082898 | GAGUUGA |
| ENSG0000082898 | GAGUUGG |
| ENSG0000082898 | GAUAUGU |
| ENSG0000082898 | GUUAAUG |
| ENSG0000082898 | UACAAAG |
| ENSG0000082898 | UCACAGG |
| ENSG0000082898 | UCACAGU |
| ENSG0000082898 | UGAGGAC |
| ENSG0000082898 | UUGGUCC |
| ENSG0000083099 | AAGUGCA |
| ENSG0000083099 | AGUGCUU |
| ENSG0000083099 | CAAUUGC |
| ENSG0000083099 | CAGGUGA |
| ENSG0000083099 | GAGGCUG |
| ENSG0000083099 | UCCCUCU |
| ENSG0000083099 | UUGUGAC |
| ENSG0000083099 | UUUGCAA |
| ENSG0000083123 | CUGGAAA |
| ENSG0000083123 | UCUGGAA |
| ENSG0000083123 | UGGCCAC |
| ENSG0000083168 | AGCUGCC |
| ENSG0000083168 | CAGACAG |
| ENSG0000083168 | CCUGCUG |
| ENSG0000083168 | CCUUCUG |

|                |          |
|----------------|----------|
| ENSG0000083168 | GCUGGUG  |
| ENSG0000083168 | UCAACAG  |
| ENSG0000083168 | UCACACA  |
| ENSG0000083168 | UCUGGAG  |
| ENSG0000083168 | UGAAAUG  |
| ENSG0000083290 | AAGGCAC  |
| ENSG0000083290 | AAUACUG  |
| ENSG0000083290 | GUGCCUG  |
| ENSG0000083307 | AAAGUGC  |
| ENSG0000083307 | AAGUGCU  |
| ENSG0000083307 | AGUGCUG  |
| ENSG0000083307 | AGUGCUU  |
| ENSG0000083307 | CAAAGUG  |
| ENSG0000083307 | CCUGUAC  |
| ENSG0000083307 | CUUGUAU  |
| ENSG0000083307 | GAGAUGA  |
| ENSG0000083307 | GAGGGGC  |
| ENSG0000083307 | GAGGUAU  |
| ENSG0000083307 | GGCAGUG  |
| ENSG0000083307 | GUAAACA  |
| ENSG0000083307 | GUAACAG  |
| ENSG0000083307 | UAUAAAG  |
| ENSG0000083307 | UUGGCAA  |
| ENSG0000083312 | AACACUG  |
| ENSG0000083312 | AAUCACU  |
| ENSG0000083312 | ACCAGCA  |
| ENSG0000083312 | ACUGCAG  |
| ENSG0000083312 | AGCAGCG  |
| ENSG0000083312 | AGCUUUAU |
| ENSG0000083312 | AGGGUUG  |
| ENSG0000083312 | AGUGCAA  |
| ENSG0000083312 | AUAUAAC  |
| ENSG0000083312 | AUCAUAC  |
| ENSG0000083312 | AUGUGCC  |
| ENSG0000083312 | CAGUGCA  |
| ENSG0000083312 | CAUGGGU  |
| ENSG0000083312 | CCUUCAU  |
| ENSG0000083312 | CUGCAGC  |
| ENSG0000083312 | CUUCACC  |
| ENSG0000083312 | GAGGCAG  |
| ENSG0000083312 | GAUUGUA  |
| ENSG0000083312 | GCAGAAG  |
| ENSG0000083312 | GCAGCAU  |
| ENSG0000083312 | GCAGGUU  |
| ENSG0000083312 | GGAAUGU  |
| ENSG0000083312 | GGUUUAC  |
| ENSG0000083312 | GUAAACA  |
| ENSG0000083312 | GUAACAG  |
| ENSG0000083312 | GUGGCC   |
| ENSG0000083312 | UCAAGUA  |
| ENSG0000083312 | UCCUGU   |
| ENSG0000083312 | UCCUGAG  |
| ENSG0000083312 | UGAUCCA  |
| ENSG0000083312 | UGCAGCU  |
| ENSG0000083312 | UGUCUUU  |
| ENSG0000083444 | GGCAGUG  |
| ENSG0000083444 | UAAUAGU  |
| ENSG0000083520 | AAAAAUC  |
| ENSG0000083520 | AAAGUAA  |
| ENSG0000083520 | CCCUGAG  |
| ENSG0000083520 | GUCACUC  |
| ENSG0000083635 | CAGCAA   |
| ENSG0000083642 | AAAACUG  |
| ENSG0000083642 | ACUGCAU  |

|                |         |
|----------------|---------|
| ENSG0000083642 | CACAGUG |
| ENSG0000083642 | CAGUAGA |
| ENSG0000083642 | UUGGUUC |
| ENSG0000083799 | AAAACUG |
| ENSG0000083799 | AAAGAGG |
| ENSG0000083799 | AACAUUC |
| ENSG0000083799 | AAUUAUU |
| ENSG0000083799 | ACAUUCA |
| ENSG0000083799 | AGCAGCA |
| ENSG0000083799 | CAAAACU |
| ENSG0000083799 | CACCACC |
| ENSG0000083799 | CUACAAA |
| ENSG0000083799 | CUCAAAC |
| ENSG0000083799 | GAAAACA |
| ENSG0000083799 | GCAGAAG |
| ENSG0000083799 | GCUUCCU |
| ENSG0000083799 | GGAAGCC |
| ENSG0000083799 | UAGACUG |
| ENSG0000083799 | UCUCAAG |
| ENSG0000083799 | UGCCAGC |
| ENSG0000083799 | UUGGAGG |
| ENSG0000083799 | UUGGCAA |
| ENSG0000083799 | UUGGUCC |
| ENSG0000083799 | UUGGUUC |
| ENSG0000083844 | GAGUCUU |
| ENSG0000083896 | AAAGAGG |
| ENSG0000083896 | AAAUCCC |
| ENSG0000083896 | AACACUG |
| ENSG0000083896 | AAGUUGU |
| ENSG0000083896 | ACACACU |
| ENSG0000083896 | ACUGCAG |
| ENSG0000083896 | AGCAGCG |
| ENSG0000083896 | AGCAGCU |
| ENSG0000083896 | AGUGCUU |
| ENSG0000083896 | CAGUGCA |
| ENSG0000083896 | CCUUCUG |
| ENSG0000083896 | GAGGCUG |
| ENSG0000083896 | GCAACUU |
| ENSG0000083896 | GCAGCAU |
| ENSG0000083896 | GCUACAU |
| ENSG0000083896 | GCUUCCU |
| ENSG0000083896 | GGACUGC |
| ENSG0000083896 | GGCAGUG |
| ENSG0000083896 | GUGCAA  |
| ENSG0000083896 | UUGGAGG |
| ENSG0000083937 | AAGGCAC |
| ENSG0000083937 | AGGCAGG |
| ENSG0000083937 | AUGGCUU |
| ENSG0000083937 | CUUUGGU |
| ENSG0000084070 | AAAGCUG |
| ENSG0000084070 | ACAGGUG |
| ENSG0000084070 | CUUUGGU |
| ENSG0000084070 | GAGGUAG |
| ENSG0000084070 | GCUGGUG |
| ENSG0000084073 | AACACUG |
| ENSG0000084073 | AAGGCAC |
| ENSG0000084073 | GAAGGAA |
| ENSG0000084073 | UUGGCAA |
| ENSG0000084090 | AAAAAUC |
| ENSG0000084090 | AAGGCAC |
| ENSG0000084090 | CAAGAGC |
| ENSG0000084090 | GGAAUGU |
| ENSG0000084090 | UUGGCAC |
| ENSG0000084112 | AAGUCUU |

|                |         |
|----------------|---------|
| ENSG0000084112 | GAGGUAG |
| ENSG0000084112 | UGUGCUU |
| ENSG0000084112 | UUCUUGU |
| ENSG0000084234 | AAAGAAU |
| ENSG0000084234 | AAUACUG |
| ENSG0000084234 | ACAGUAC |
| ENSG0000084234 | ACAGUAU |
| ENSG0000084234 | ACAUUCA |
| ENSG0000084234 | AGUACUG |
| ENSG0000084234 | AUAUUAU |
| ENSG0000084234 | AUCAUAC |
| ENSG0000084234 | CAGUAGU |
| ENSG0000084234 | GGUUACC |
| ENSG0000084234 | UCACAGG |
| ENSG0000084234 | UGCAUAG |
| ENSG0000084444 | ACAAUAU |
| ENSG0000084444 | CCCUGAG |
| ENSG0000084444 | GAGGUAG |
| ENSG0000084463 | CCAGUGC |
| ENSG0000084463 | UACAAAG |
| ENSG0000084628 | AGCACCA |
| ENSG0000084628 | CAAAGCA |
| ENSG0000084628 | CUCUGGG |
| ENSG0000084628 | GAAAACA |
| ENSG0000084628 | GGAGGCA |
| ENSG0000084628 | GUGUGGC |
| ENSG0000084628 | UAUAAAG |
| ENSG0000084628 | UAUUGCU |
| ENSG0000084636 | AACAUUC |
| ENSG0000084636 | AGCACCA |
| ENSG0000084636 | UCACAAG |
| ENSG0000084652 | AAGUGCU |
| ENSG0000084652 | ACAUCAC |
| ENSG0000084652 | AGCAGCU |
| ENSG0000084652 | AGGCAGG |
| ENSG0000084652 | AGUGCCU |
| ENSG0000084652 | AUCCUUU |
| ENSG0000084652 | CAGCAGG |
| ENSG0000084652 | CCCCCAG |
| ENSG0000084652 | CCCCUGG |
| ENSG0000084652 | GAGGUAG |
| ENSG0000084652 | GCCUGAU |
| ENSG0000084652 | GCCUGGA |
| ENSG0000084652 | GCCUGGG |
| ENSG0000084652 | GGAGGAG |
| ENSG0000084652 | GGUUUAC |
| ENSG0000084652 | GUGCCUG |
| ENSG0000084652 | UCAUUUG |
| ENSG0000084652 | UGAGAAG |
| ENSG0000084676 | AAAAGUA |
| ENSG0000084676 | AAACUGU |
| ENSG0000084676 | AAAGUAA |
| ENSG0000084676 | AAUCUCA |
| ENSG0000084676 | AAUUAUU |
| ENSG0000084676 | ACAAUAU |
| ENSG0000084676 | ACACACC |
| ENSG0000084676 | ACACACU |
| ENSG0000084676 | AGCAUUC |
| ENSG0000084676 | AGCCCUU |
| ENSG0000084676 | AGCUGCC |
| ENSG0000084676 | AUAUAAC |
| ENSG0000084676 | AUGGCUU |
| ENSG0000084676 | AUUGCAC |
| ENSG0000084676 | CACAGUG |

|                |          |
|----------------|----------|
| ENSG0000084676 | CCUUCAU  |
| ENSG0000084676 | GAUUGUA  |
| ENSG0000084676 | GAUUGUC  |
| ENSG0000084676 | GCUGGUG  |
| ENSG0000084676 | GGCAGUG  |
| ENSG0000084676 | GGCUCAG  |
| ENSG0000084676 | GGCUGCG  |
| ENSG0000084676 | GGUAGAC  |
| ENSG0000084676 | UAUUGCU  |
| ENSG0000084676 | UCACAGU  |
| ENSG0000084676 | UCUCAAG  |
| ENSG0000084676 | UCUGGAA  |
| ENSG0000084676 | UGCAUUG  |
| ENSG0000084676 | UGGCUGC  |
| ENSG0000084676 | UGUAUAA  |
| ENSG0000084676 | UGUAUGU  |
| ENSG0000084676 | UUCUUGU  |
| ENSG0000084693 | AGCUGCC  |
| ENSG0000084693 | AGGGAGG  |
| ENSG0000084693 | UAGGGCC  |
| ENSG0000084693 | UUCCUCG  |
| ENSG0000084731 | AGGCAGG  |
| ENSG0000084731 | CUGGGGG  |
| ENSG0000084731 | GCCUCGU  |
| ENSG0000084731 | GCCUGGG  |
| ENSG0000084731 | GUAAACA  |
| ENSG0000084731 | UGUGCUU  |
| ENSG0000084733 | AGUGCUU  |
| ENSG0000084733 | AGUGGUU  |
| ENSG0000084733 | CACUGUU  |
| ENSG0000084733 | CUCUCC   |
| ENSG0000084733 | GCUAGCA  |
| ENSG0000084754 | AAGGCAC  |
| ENSG0000084764 | AAAAAUC  |
| ENSG0000084764 | AAAAGUA  |
| ENSG0000084764 | AACGGAA  |
| ENSG0000084764 | AAGUGCA  |
| ENSG0000084764 | ACCACAG  |
| ENSG0000084764 | AGUGCAA  |
| ENSG0000084764 | CAAAGCA  |
| ENSG0000084764 | CCAGUAC  |
| ENSG0000084774 | AGCAGCU  |
| ENSG0000084774 | CAGCUGG  |
| ENSG0000084774 | CUGCCC   |
| ENSG0000084774 | UCCUUGC  |
| ENSG0000085063 | CUGGCUC  |
| ENSG0000085063 | GCCUGGA  |
| ENSG0000085063 | GGCUCUG  |
| ENSG0000085185 | AAACUGU  |
| ENSG0000085185 | AAGGCGC  |
| ENSG0000085185 | ACAAUUAU |
| ENSG0000085185 | AGCACCA  |
| ENSG0000085185 | CAGUCUG  |
| ENSG0000085185 | GAGAUGA  |
| ENSG0000085185 | GCUCGGU  |
| ENSG0000085185 | UAAUGCU  |
| ENSG0000085185 | UAUUGCU  |
| ENSG0000085185 | UCACAGU  |
| ENSG0000085185 | UUCUGCA  |
| ENSG0000085185 | UUCUUGU  |
| ENSG0000085185 | UUGGUCC  |
| ENSG0000085185 | UUGUUCG  |
| ENSG0000085224 | AAAAACC  |
| ENSG0000085224 | AAAAAUC  |

|                |         |
|----------------|---------|
| ENSG0000085224 | AAACUGU |
| ENSG0000085224 | AACUACU |
| ENSG0000085224 | AACUCUA |
| ENSG0000085224 | AAGUCUU |
| ENSG0000085224 | AAUACUG |
| ENSG0000085224 | ACAUCAC |
| ENSG0000085224 | ACAUUAC |
| ENSG0000085224 | AGCAAAA |
| ENSG0000085224 | AGUGCAA |
| ENSG0000085224 | AUACAAG |
| ENSG0000085224 | AUAUUAU |
| ENSG0000085224 | CAAAGUG |
| ENSG0000085224 | CAGCAGA |
| ENSG0000085224 | CAGCAGG |
| ENSG0000085224 | CAGCUGG |
| ENSG0000085224 | CAGUAGU |
| ENSG0000085224 | CUAGGCU |
| ENSG0000085224 | CUUCACC |
| ENSG0000085224 | GAGAAGA |
| ENSG0000085224 | GCAACUU |
| ENSG0000085224 | GCUGGAU |
| ENSG0000085224 | GGACUGC |
| ENSG0000085224 | GGCAUUG |
| ENSG0000085224 | GUCAUUG |
| ENSG0000085224 | UACAAAG |
| ENSG0000085224 | UACAGUU |
| ENSG0000085224 | UCACAGG |
| ENSG0000085224 | UCACAGU |
| ENSG0000085224 | UCCAGUU |
| ENSG0000085224 | UGACAUC |
| ENSG0000085224 | UGAGAAG |
| ENSG0000085224 | UGAGGAC |
| ENSG0000085224 | UGCCAGC |
| ENSG0000085224 | UGGACUG |
| ENSG0000085224 | UGUGCUU |
| ENSG0000085224 | UUGGUCC |
| ENSG0000085365 | ACAAUAU |
| ENSG0000085365 | ACAGUAC |
| ENSG0000085365 | ACAGUAU |
| ENSG0000085365 | AGCUGCC |
| ENSG0000085365 | CAAAACU |
| ENSG0000085365 | CACCACC |
| ENSG0000085365 | CCAGUAC |
| ENSG0000085365 | GGCAGCG |
| ENSG0000085365 | GUAAACA |
| ENSG0000085365 | GUUAAUG |
| ENSG0000085365 | UCAAGUA |
| ENSG0000085365 | UGUCUUU |
| ENSG0000085377 | AGCCCUU |
| ENSG0000085382 | AAAUGGU |
| ENSG0000085382 | AUAUAAC |
| ENSG0000085382 | AUAUUAU |
| ENSG0000085382 | CAGUAGA |
| ENSG0000085433 | AGCAGCA |
| ENSG0000085433 | UGUGCUU |
| ENSG0000085433 | UUGGCAA |
| ENSG0000085449 | AAUUUUA |
| ENSG0000085449 | AGCACCA |
| ENSG0000085449 | GCAGAAG |
| ENSG0000085449 | UGCUCAC |
| ENSG0000085491 | GAGGUAG |
| ENSG0000085511 | AGCAGCA |
| ENSG0000085511 | AUGGCAC |
| ENSG0000085644 | CAAAGUG |



|                |          |
|----------------|----------|
| ENSG0000085721 | AUUGCAC  |
| ENSG0000085721 | CUCUCC   |
| ENSG0000085733 | AAAGUAAU |
| ENSG0000085733 | AUAUUAAU |
| ENSG0000085733 | GCUACAU  |
| ENSG0000085733 | GUAGUGU  |
| ENSG0000085741 | GGUGGGC  |
| ENSG0000085831 | ACAUCAC  |
| ENSG0000085831 | ACAUUCA  |
| ENSG0000085831 | AGGAGCU  |
| ENSG0000085831 | AGGCAGG  |
| ENSG0000085831 | GGCAGGG  |
| ENSG0000085831 | GUAAACA  |
| ENSG0000085831 | GUCCAGA  |
| ENSG0000085831 | UCACAGU  |
| ENSG0000085831 | UUCUAAU  |
| ENSG0000085831 | UUCUGCA  |
| ENSG0000085832 | AAAACUG  |
| ENSG0000085832 | AACAAAC  |
| ENSG0000085832 | AAUACUG  |
| ENSG0000085832 | AAUCUCA  |
| ENSG0000085832 | AAUUUUA  |
| ENSG0000085832 | ACAUUCA  |
| ENSG0000085832 | AGCACCA  |
| ENSG0000085832 | AGCCCUU  |
| ENSG0000085832 | AGGUAGU  |
| ENSG0000085832 | CAGGAAC  |
| ENSG0000085832 | CCAGUGC  |
| ENSG0000085832 | CCUUCAU  |
| ENSG0000085832 | GUAUUCU  |
| ENSG0000085832 | GUCAACA  |
| ENSG0000085832 | UUCAAAU  |
| ENSG0000085832 | UUGGUCC  |
| ENSG0000085872 | UCACAGG  |
| ENSG0000085872 | UCACAGU  |
| ENSG0000085978 | AAAGUAAU |
| ENSG0000085978 | AUAAAAGU |
| ENSG0000085978 | GAGGUAG  |
| ENSG0000085978 | GAGGUAAU |
| ENSG0000085978 | GUAGUGU  |
| ENSG0000085978 | UGCCUG   |
| ENSG0000085978 | UUGGCAA  |
| ENSG0000085998 | ACAGUAC  |
| ENSG0000085998 | CCAGUGU  |
| ENSG0000086062 | AAAAAUC  |
| ENSG0000086062 | CCCUGAG  |
| ENSG0000086062 | CUACAAA  |
| ENSG0000086062 | GACCCUG  |
| ENSG0000086062 | UCAAGUA  |
| ENSG0000086102 | ACACACU  |
| ENSG0000086102 | CUGGACU  |
| ENSG0000086102 | UCACAGU  |
| ENSG0000086189 | UGUGCGG  |
| ENSG0000086200 | AAAGUAA  |
| ENSG0000086200 | ACUGUAG  |
| ENSG0000086200 | CUUUGGU  |
| ENSG0000086200 | GAGGUAAU |
| ENSG0000086200 | GGAAGAC  |
| ENSG0000086200 | GGGCCCC  |
| ENSG0000086200 | UACAAAG  |
| ENSG0000086289 | AAAGUAA  |
| ENSG0000086289 | AGGAGCU  |
| ENSG0000086289 | GUGCCAC  |
| ENSG0000086289 | UAGGGCC  |

|                 |          |
|-----------------|----------|
| ENSG00000086300 | AGUAACA  |
| ENSG00000086300 | UUCCAUA  |
| ENSG00000086475 | AAUCACU  |
| ENSG00000086475 | AAUGUUG  |
| ENSG00000086475 | ACAAUUAU |
| ENSG00000086475 | AGCUGCC  |
| ENSG00000086475 | GGCAAGA  |
| ENSG00000086475 | UUGGCAA  |
| ENSG00000086506 | ACUCAA   |
| ENSG00000086544 | CACAGUG  |
| ENSG00000086544 | CUGCAGC  |
| ENSG00000086544 | CUGCAGG  |
| ENSG00000086544 | UUGGUUC  |
| ENSG00000086570 | AAAGUGC  |
| ENSG00000086570 | AGGGUUG  |
| ENSG00000086570 | CACUCCU  |
| ENSG00000086570 | CAGACAG  |
| ENSG00000086570 | CUCUCC   |
| ENSG00000086570 | CUUGUGU  |
| ENSG00000086570 | GCUACAU  |
| ENSG00000086570 | GGCAGUG  |
| ENSG00000086570 | GUGCCUG  |
| ENSG00000086570 | UUGUGUC  |
| ENSG00000086589 | AAAAAUC  |
| ENSG00000086589 | AGAUGUG  |
| ENSG00000086589 | CUACAAA  |
| ENSG00000086589 | GUUAAUG  |
| ENSG00000086619 | UCAAGUA  |
| ENSG00000086619 | UGCAUUAU |
| ENSG00000086666 | AUAAUAC  |
| ENSG00000086712 | AGUAGUU  |
| ENSG00000086712 | CACCACC  |
| ENSG00000086712 | CAGUAGU  |
| ENSG00000086712 | GGUAGAC  |
| ENSG00000086712 | GUGCAA   |
| ENSG00000086730 | UAAUGCU  |
| ENSG00000086758 | AUAUAAC  |
| ENSG00000086991 | AUUGCAC  |
| ENSG00000086991 | UCAACAG  |
| ENSG00000087053 | AAAGUGC  |
| ENSG00000087053 | ACAGUAU  |
| ENSG00000087053 | AGCUGCC  |
| ENSG00000087053 | AUAAAGU  |
| ENSG00000087053 | AUGGCUU  |
| ENSG00000087053 | CUACAGU  |
| ENSG00000087053 | GAUUGUA  |
| ENSG00000087053 | GGCUCUG  |
| ENSG00000087053 | GUCAGUU  |
| ENSG00000087053 | UACAGUU  |
| ENSG00000087053 | UUUGCAA  |
| ENSG00000087074 | CUACAAA  |
| ENSG00000087086 | AGCUGCC  |
| ENSG00000087095 | AAAGAGC  |
| ENSG00000087095 | AAAGUAA  |
| ENSG00000087095 | AAAUCCC  |
| ENSG00000087095 | AAGUGUG  |
| ENSG00000087095 | AAGUUGU  |
| ENSG00000087095 | AAUGUUG  |
| ENSG00000087095 | AAUUAUU  |
| ENSG00000087095 | ACAGUAU  |
| ENSG00000087095 | ACAUUCA  |
| ENSG00000087095 | AGUGUGC  |
| ENSG00000087095 | AUACAAG  |
| ENSG00000087095 | AUGCACC  |

|                |         |
|----------------|---------|
| ENSG0000087095 | AUGUAAU |
| ENSG0000087095 | CAAAGUG |
| ENSG0000087095 | CACCACC |
| ENSG0000087095 | CAGGUGA |
| ENSG0000087095 | CAGUAGA |
| ENSG0000087095 | CAGUGCA |
| ENSG0000087095 | CCAGGAG |
| ENSG0000087095 | CUAUACA |
| ENSG0000087095 | CUCUGGG |
| ENSG0000087095 | GAGGUAG |
| ENSG0000087095 | GAUUGGU |
| ENSG0000087095 | GCUACAU |
| ENSG0000087095 | GGCUCAG |
| ENSG0000087095 | GUAAACA |
| ENSG0000087095 | GUCCAGA |
| ENSG0000087095 | GUGCAAA |
| ENSG0000087095 | UACAAAG |
| ENSG0000087095 | UACAGUU |
| ENSG0000087095 | UCACAUU |
| ENSG0000087095 | UCAUACA |
| ENSG0000087095 | UGAAGUG |
| ENSG0000087095 | UGUAUAA |
| ENSG0000087095 | UUCAAGC |
| ENSG0000087111 | GGCUCAG |
| ENSG0000087152 | AAUCUCA |
| ENSG0000087152 | AAUGCCC |
| ENSG0000087152 | ACCACAG |
| ENSG0000087152 | ACCAGCA |
| ENSG0000087152 | ACCAUUA |
| ENSG0000087152 | AGCAGCA |
| ENSG0000087152 | AGCCUGC |
| ENSG0000087152 | AGGGAGG |
| ENSG0000087152 | AUCCCUU |
| ENSG0000087152 | AUGGAUU |
| ENSG0000087152 | CACCAGC |
| ENSG0000087152 | CAGACAG |
| ENSG0000087152 | CAGCAGA |
| ENSG0000087152 | CCAGCAU |
| ENSG0000087152 | CCAGUAC |
| ENSG0000087152 | CCCCCAG |
| ENSG0000087152 | CCCCUGG |
| ENSG0000087152 | CCUGUAC |
| ENSG0000087152 | CUCUUCC |
| ENSG0000087152 | CUGCCCC |
| ENSG0000087152 | CUGCUCU |
| ENSG0000087152 | CUGGGCA |
| ENSG0000087152 | CUUGGGC |
| ENSG0000087152 | GAGCCCU |
| ENSG0000087152 | GAGCUGC |
| ENSG0000087152 | GAGGCUG |
| ENSG0000087152 | GCCUGGA |
| ENSG0000087152 | GCCUGGG |
| ENSG0000087152 | GCGGGUG |
| ENSG0000087152 | GGAGAGA |
| ENSG0000087152 | GGCAGUG |
| ENSG0000087152 | GGCUCAG |
| ENSG0000087152 | GGGAGCU |
| ENSG0000087152 | GGGGAGC |
| ENSG0000087152 | GUCCAGA |
| ENSG0000087152 | GUGCCUG |
| ENSG0000087152 | GUGGCC  |
| ENSG0000087152 | UCACAUU |
| ENSG0000087152 | UCCAGUU |
| ENSG0000087152 | UCCCACC |

|                |         |
|----------------|---------|
| ENSG0000087152 | UCUCAAG |
| ENSG0000087152 | UCUCACC |
| ENSG0000087152 | UGAAGCU |
| ENSG0000087152 | UGCUGAC |
| ENSG0000087152 | UUCAAAU |
| ENSG0000087157 | CUGCAGC |
| ENSG0000087157 | GGCUCUG |
| ENSG0000087157 | UGCAGCU |
| ENSG0000087245 | AAGUGCA |
| ENSG0000087245 | AGCACCA |
| ENSG0000087245 | CAAAGCA |
| ENSG0000087245 | CCAGUGC |
| ENSG0000087245 | UGACAUC |
| ENSG0000087245 | UGUCUUU |
| ENSG0000087258 | AAGUCAC |
| ENSG0000087258 | AAUUAUU |
| ENSG0000087258 | ACAUUAC |
| ENSG0000087258 | CUGCUCA |
| ENSG0000087258 | CUUACAG |
| ENSG0000087258 | UACAAAG |
| ENSG0000087258 | UAUUACC |
| ENSG0000087258 | UUGGCAA |
| ENSG0000087258 | UUGGCAC |
| ENSG0000087263 | CAAGAGC |
| ENSG0000087266 | CCUGCUG |
| ENSG0000087266 | GGCUCUG |
| ENSG0000087274 | AAAGAAU |
| ENSG0000087274 | AAUUUUA |
| ENSG0000087274 | CUCUCC  |
| ENSG0000087274 | GUCAUUG |
| ENSG0000087274 | UACAAAG |
| ENSG0000087274 | UCACAGU |
| ENSG0000087274 | UGCAUAG |
| ENSG0000087274 | UGCAUUG |
| ENSG0000087274 | UUGUGAC |
| ENSG0000087299 | AAGGCAC |
| ENSG0000087299 | ACCUGGA |
| ENSG0000087299 | CUUGUAU |
| ENSG0000087299 | GAGGUAG |
| ENSG0000087299 | GAGGUAU |
| ENSG0000087299 | GGAUGAG |
| ENSG0000087299 | GGUUUAC |
| ENSG0000087299 | GUGAAUG |
| ENSG0000087299 | UACAAAG |
| ENSG0000087299 | UGAAGUG |
| ENSG0000087299 | UGGAGAU |
| ENSG0000087299 | UCCAUA  |
| ENSG0000087299 | UUGGAGG |
| ENSG0000087302 | AAAGAAU |
| ENSG0000087303 | ACAGUAC |
| ENSG0000087303 | ACAGUAU |
| ENSG0000087303 | AGCACCA |
| ENSG0000087303 | GAGGUAG |
| ENSG0000087303 | UGUGCUU |
| ENSG0000087338 | UUCAAAU |
| ENSG0000087338 | UUCUUGU |
| ENSG0000087338 | UUUCAAC |
| ENSG0000087365 | AAGAACC |
| ENSG0000087365 | UACAAAG |
| ENSG0000087448 | AGCUGCC |
| ENSG0000087448 | CUUUGGU |
| ENSG0000087448 | GGCCUG  |
| ENSG0000087448 | UUCAAGC |
| ENSG0000087448 | UUGGUCC |

|                |         |
|----------------|---------|
| ENSG0000087448 | UUUCAAC |
| ENSG0000087470 | AGCAGCU |
| ENSG0000087470 | AUGCAUU |
| ENSG0000087470 | UGAAAUG |
| ENSG0000087470 | UUCUGCA |
| ENSG0000087495 | CUUCUCU |
| ENSG0000087510 | AAAGCUG |
| ENSG0000087510 | UCAAGUA |
| ENSG0000087510 | UUCAAGC |
| ENSG0000087586 | UAUUGCU |
| ENSG0000087903 | CAAAACU |
| ENSG0000087903 | GUAAACA |
| ENSG0000087916 | UACAAAG |
| ENSG0000088038 | AAAACUG |
| ENSG0000088038 | AUUCAUU |
| ENSG0000088038 | GCUUCCU |
| ENSG0000088038 | GGCAGGG |
| ENSG0000088038 | GGGGAGC |
| ENSG0000088038 | GGUUUAC |
| ENSG0000088179 | AAGUGCA |
| ENSG0000088179 | AGUGCAA |
| ENSG0000088179 | AGUGCUG |
| ENSG0000088179 | AUAAAGU |
| ENSG0000088247 | AAAACUG |
| ENSG0000088247 | AAAGUAA |
| ENSG0000088247 | ACAUUCA |
| ENSG0000088247 | AUUCAUU |
| ENSG0000088247 | GGAAUGU |
| ENSG0000088247 | UCACAGG |
| ENSG0000088247 | UCACAGU |
| ENSG0000088247 | UCACAUU |
| ENSG0000088247 | UCAUUCG |
| ENSG0000088247 | UUGUGAC |
| ENSG0000088305 | AAAACUG |
| ENSG0000088305 | AAACUGU |
| ENSG0000088305 | AACUCUA |
| ENSG0000088305 | AAGGCAC |
| ENSG0000088305 | AAUACUG |
| ENSG0000088305 | CCUGCUG |
| ENSG0000088305 | UACAAAG |
| ENSG0000088305 | UCAAGUA |
| ENSG0000088305 | UCCUGAG |
| ENSG0000088305 | UGAAAUG |
| ENSG0000088305 | UGCAGCU |
| ENSG0000088305 | UGUAUAA |
| ENSG0000088356 | AGUGCCU |
| ENSG0000088356 | AUUCAUU |
| ENSG0000088356 | CAGCAGG |
| ENSG0000088356 | CUUGUGU |
| ENSG0000088356 | GGAAUGU |
| ENSG0000088356 | UUGUGUC |
| ENSG0000088367 | AAAAAUC |
| ENSG0000088367 | AAAAGUA |
| ENSG0000088367 | ACAGUAC |
| ENSG0000088367 | ACAUCAC |
| ENSG0000088367 | ACCAGCA |
| ENSG0000088367 | ACUGUUU |
| ENSG0000088367 | AGCAGCA |
| ENSG0000088367 | AGUGCAA |
| ENSG0000088367 | CACUGUU |
| ENSG0000088367 | CAGCUGG |
| ENSG0000088367 | CAGUGCA |
| ENSG0000088367 | CCUUCUU |
| ENSG0000088367 | CUCUGGG |

|                 |          |
|-----------------|----------|
| ENSG00000088367 | CUGGCUC  |
| ENSG00000088367 | CUUCUCU  |
| ENSG00000088367 | CUUGGAG  |
| ENSG00000088367 | GAGUAUU  |
| ENSG00000088367 | GCAGAAG  |
| ENSG00000088367 | GCAGGAC  |
| ENSG00000088367 | GUCUACU  |
| ENSG00000088367 | GUCUGCC  |
| ENSG00000088367 | GUCUUGC  |
| ENSG00000088367 | GUGACAG  |
| ENSG00000088367 | GUGGGGA  |
| ENSG00000088367 | UAAUAUC  |
| ENSG00000088367 | UAUAAUA  |
| ENSG00000088367 | UCACAGU  |
| ENSG00000088367 | UCCUCU   |
| ENSG00000088367 | UGCAAAG  |
| ENSG00000088367 | UGCUCAC  |
| ENSG00000088367 | UGGGGGA  |
| ENSG00000088367 | UGUGCUU  |
| ENSG00000088387 | CAGCAGG  |
| ENSG00000088387 | UGUGCUU  |
| ENSG00000088448 | GCUACAU  |
| ENSG00000088448 | UGCAUAG  |
| ENSG00000088451 | GAGGUAG  |
| ENSG00000088451 | UAUAAAG  |
| ENSG00000088538 | AAAAACC  |
| ENSG00000088538 | AAAUCCC  |
| ENSG00000088538 | ACAAUAU  |
| ENSG00000088538 | ACAGUAC  |
| ENSG00000088538 | ACAGUAU  |
| ENSG00000088538 | ACCUGGA  |
| ENSG00000088538 | ACUGCAG  |
| ENSG00000088538 | AGGUAGU  |
| ENSG00000088538 | CAGCAA   |
| ENSG00000088538 | CAGUAGA  |
| ENSG00000088538 | CCCUGAG  |
| ENSG00000088538 | CUGCAGG  |
| ENSG00000088538 | GAGGUAG  |
| ENSG00000088538 | GGCAGUG  |
| ENSG00000088538 | UACAAAG  |
| ENSG00000088538 | UGCUCAC  |
| ENSG00000088543 | AAGUGCU  |
| ENSG00000088543 | CUGGGGG  |
| ENSG00000088543 | UCCUCU   |
| ENSG00000088682 | AAGACAU  |
| ENSG00000088726 | GAAGGAA  |
| ENSG00000088726 | GGUGGUC  |
| ENSG00000088756 | AGGUAGU  |
| ENSG00000088756 | CUGGAAA  |
| ENSG00000088756 | GAGGUAU  |
| ENSG00000088756 | GCACCAU  |
| ENSG00000088756 | GCAGAAG  |
| ENSG00000088756 | GUGAGGU  |
| ENSG00000088756 | UCCAGUU  |
| ENSG00000088808 | AGCACCA  |
| ENSG00000088808 | AUAU AAC |
| ENSG00000088808 | CACCACC  |
| ENSG00000088808 | CUUUGGU  |
| ENSG00000088808 | GCACCAU  |
| ENSG00000088808 | GCUGUCU  |
| ENSG00000088808 | UCACAUU  |
| ENSG00000088808 | UGUCUGC  |
| ENSG00000088808 | UUGGCAA  |
| ENSG00000088812 | AAAAACC  |

|                |         |
|----------------|---------|
| ENSG0000088812 | AACACUG |
| ENSG0000088812 | AAGUGCA |
| ENSG0000088812 | AAUUUUA |
| ENSG0000088812 | ACUCCAG |
| ENSG0000088812 | ACUGCAU |
| ENSG0000088812 | ACUGUAG |
| ENSG0000088812 | AGCACCA |
| ENSG0000088812 | AGUAACA |
| ENSG0000088812 | AGUGCAA |
| ENSG0000088812 | AUGGCAC |
| ENSG0000088812 | AUGUAAU |
| ENSG0000088812 | CAGGCUC |
| ENSG0000088812 | CCUGCUG |
| ENSG0000088812 | CUAGGCU |
| ENSG0000088812 | CUGCUCA |
| ENSG0000088812 | GAAGGAA |
| ENSG0000088812 | GACCAUG |
| ENSG0000088812 | GAGGCUG |
| ENSG0000088812 | GGAAGAC |
| ENSG0000088812 | UAAGACG |
| ENSG0000088812 | UAUGGUU |
| ENSG0000088812 | UGCUGAC |
| ENSG0000088812 | UGUAUAA |
| ENSG0000088812 | UGUGCUU |
| ENSG0000088812 | UUGUGUC |
| ENSG0000088812 | UUUGCAA |
| ENSG0000088826 | AGAUAAA |
| ENSG0000088827 | CACCACC |
| ENSG0000088832 | AAAACUG |
| ENSG0000088832 | AAUCACU |
| ENSG0000088832 | ACCAGCA |
| ENSG0000088832 | AGCAGCA |
| ENSG0000088832 | AUCACUA |
| ENSG0000088832 | AUGGCUU |
| ENSG0000088832 | CUACAAA |
| ENSG0000088832 | GUAGUGU |
| ENSG0000088832 | UGCAGCU |
| ENSG0000088833 | AAAAACC |
| ENSG0000088833 | CUGGACU |
| ENSG0000088833 | GCAACUU |
| ENSG0000088833 | GGACUGC |
| ENSG0000088833 | UGGACUG |
| ENSG0000088833 | UUUUUGC |
| ENSG0000088854 | AAAAACC |
| ENSG0000088854 | AAAAGUA |
| ENSG0000088854 | AAGGCAC |
| ENSG0000088854 | AAGUAGC |
| ENSG0000088854 | ACAGUAC |
| ENSG0000088854 | ACAGUAU |
| ENSG0000088854 | ACUGCAG |
| ENSG0000088854 | ACUGUGU |
| ENSG0000088854 | AUGUGCC |
| ENSG0000088854 | AUUGCAC |
| ENSG0000088854 | CAGCAAA |
| ENSG0000088854 | CAGUAGU |
| ENSG0000088854 | CAUAUUG |
| ENSG0000088854 | CUACAGU |
| ENSG0000088854 | GAGGUAG |
| ENSG0000088854 | GAGGUAU |
| ENSG0000088854 | GGCACGG |
| ENSG0000088854 | GUGCUUG |
| ENSG0000088854 | UACAAAG |
| ENSG0000088854 | UACAGUU |
| ENSG0000088854 | UCCCUUG |

|                |          |
|----------------|----------|
| ENSG0000088854 | UGAAGCU  |
| ENSG0000088854 | UGAGAAG  |
| ENSG0000088854 | UGUGCUU  |
| ENSG0000088854 | UUGAGGC  |
| ENSG0000088854 | UUGGCAA  |
| ENSG0000088854 | UUGGUCC  |
| ENSG0000088876 | UCCACA   |
| ENSG0000088881 | AGUGCUG  |
| ENSG0000088881 | CAAGAGC  |
| ENSG0000088881 | CACAGUG  |
| ENSG0000088881 | CCCUGAG  |
| ENSG0000088881 | CUGGGCA  |
| ENSG0000088881 | UGUGUGG  |
| ENSG0000088986 | GUCUCUG  |
| ENSG0000088992 | AAAAACC  |
| ENSG0000088992 | AGAUAAA  |
| ENSG0000089006 | GAGGUAU  |
| ENSG0000089041 | AAAGAAU  |
| ENSG0000089041 | UCCCUUU  |
| ENSG0000089050 | AAAAAUC  |
| ENSG0000089057 | AAAAACC  |
| ENSG0000089057 | AAAACUG  |
| ENSG0000089057 | AAACUGU  |
| ENSG0000089057 | AAAGAAU  |
| ENSG0000089057 | AAAGUAA  |
| ENSG0000089057 | AAAGUAC  |
| ENSG0000089057 | AACACUG  |
| ENSG0000089057 | AACAGUC  |
| ENSG0000089057 | AAGAACC  |
| ENSG0000089057 | AAGUUGU  |
| ENSG0000089057 | AAUACUG  |
| ENSG0000089057 | ACAAUUAU |
| ENSG0000089057 | ACACACC  |
| ENSG0000089057 | ACACACU  |
| ENSG0000089057 | ACAGUAC  |
| ENSG0000089057 | ACUAGAU  |
| ENSG0000089057 | ACUGCAG  |
| ENSG0000089057 | ACUGCAU  |
| ENSG0000089057 | ACUGGCC  |
| ENSG0000089057 | ACUGGCU  |
| ENSG0000089057 | ACUGUUU  |
| ENSG0000089057 | AUAAAGU  |
| ENSG0000089057 | AUACAAG  |
| ENSG0000089057 | AUUCAUU  |
| ENSG0000089057 | CAGCAAA  |
| ENSG0000089057 | CAGUAGU  |
| ENSG0000089057 | CCAGUAC  |
| ENSG0000089057 | CCCUGAG  |
| ENSG0000089057 | CCUUCUU  |
| ENSG0000089057 | CUACAGU  |
| ENSG0000089057 | CUCAAAC  |
| ENSG0000089057 | CUGCUCU  |
| ENSG0000089057 | CUGGAAA  |
| ENSG0000089057 | CUGGGCA  |
| ENSG0000089057 | CUUCACC  |
| ENSG0000089057 | GACCAUG  |
| ENSG0000089057 | GAGAAAU  |
| ENSG0000089057 | GAGGCUG  |
| ENSG0000089057 | GCAUCCC  |
| ENSG0000089057 | GGAAUGU  |
| ENSG0000089057 | GGGUAAG  |
| ENSG0000089057 | GUAUUCU  |
| ENSG0000089057 | UCACAAG  |
| ENSG0000089057 | UCCUCU   |



|                 |         |
|-----------------|---------|
| ENSG00000089057 | UCCUGU  |
| ENSG00000089091 | AAUUAUU |
| ENSG00000089116 | CUUUGGU |
| ENSG00000089123 | AGCAGCA |
| ENSG00000089154 | CAAAGCA |
| ENSG00000089154 | UUUCAAC |
| ENSG00000089159 | AACAGUC |
| ENSG00000089159 | AAUCUCU |
| ENSG00000089159 | CACAGUG |
| ENSG00000089159 | CAGUAGU |
| ENSG00000089159 | CCAGUGU |
| ENSG00000089159 | GCUGGAU |
| ENSG00000089159 | GGCAUUG |
| ENSG00000089159 | GGGGUGC |
| ENSG00000089159 | UAUUGCU |
| ENSG00000089159 | UCACAGU |
| ENSG00000089159 | UCCAGUU |
| ENSG00000089159 | UCCUGAG |
| ENSG00000089159 | UGUGCUU |
| ENSG00000089163 | UCCUGU  |
| ENSG00000089177 | AAGGCAC |
| ENSG00000089177 | CAAAGCA |
| ENSG00000089177 | GCAGAAG |
| ENSG00000089177 | UAAUAUC |
| ENSG00000089177 | UCAUUUG |
| ENSG00000089177 | UCCUGAG |
| ENSG00000089195 | CAUAUUG |
| ENSG00000089195 | UAUUGCU |
| ENSG00000089220 | UUCAAAU |
| ENSG00000089225 | AAGAACC |
| ENSG00000089225 | CCCUGUU |
| ENSG00000089225 | GAAACAU |
| ENSG00000089225 | GAGGUAG |
| ENSG00000089250 | AUGCACC |
| ENSG00000089250 | GAGGCAG |
| ENSG00000089250 | GCCCUUA |
| ENSG00000089280 | UACAAAG |
| ENSG00000089280 | UCCAGUU |
| ENSG00000089280 | UGGGUAC |
| ENSG00000089289 | AUGAUGA |
| ENSG00000089289 | UUGACAC |
| ENSG00000089356 | GAGAUGA |
| ENSG00000089486 | CAAAGCA |
| ENSG00000089486 | CACAGGG |
| ENSG00000089486 | CACAGUG |
| ENSG00000089486 | CUACAAA |
| ENSG00000089486 | GAAGGAA |
| ENSG00000089486 | GAGAAAU |
| ENSG00000089486 | GGAAGCC |
| ENSG00000089486 | GGAGUCC |
| ENSG00000089486 | GGCAAGA |
| ENSG00000089486 | GGCAGUG |
| ENSG00000089486 | GUGACAG |
| ENSG00000089486 | UCACAGG |
| ENSG00000089486 | UCACAGU |
| ENSG00000089486 | UUGGUCC |
| ENSG00000089558 | CAGACAG |
| ENSG00000089558 | GACCAUG |
| ENSG00000089558 | GCAGAAG |
| ENSG00000089558 | GCCUGGG |
| ENSG00000089558 | GUCCAGA |
| ENSG00000089597 | AGCAGCU |
| ENSG00000089597 | CAAACU  |
| ENSG00000089597 | CAGGUGA |

|                 |          |
|-----------------|----------|
| ENSG00000089597 | CCAGUGU  |
| ENSG00000089597 | GGGGUGG  |
| ENSG00000089682 | UCCUGAG  |
| ENSG00000089685 | UGAAAUG  |
| ENSG00000089692 | UGCUGAC  |
| ENSG00000089693 | CCCUGAG  |
| ENSG00000089693 | UAAUAUC  |
| ENSG00000089693 | UUCCAUA  |
| ENSG00000089723 | AGCACCA  |
| ENSG00000089723 | CAGCAGA  |
| ENSG00000089723 | CUGGCUC  |
| ENSG00000089818 | AGCUGCC  |
| ENSG00000089818 | AGUGAUC  |
| ENSG00000089818 | CAA AUGC |
| ENSG00000089818 | GAGAAAU  |
| ENSG00000089818 | GAUUGUC  |
| ENSG00000089818 | GCACCAU  |
| ENSG00000089818 | UAUUGCU  |
| ENSG00000089818 | UCACAGG  |
| ENSG00000089902 | AAAAGUA  |
| ENSG00000089902 | AAAGUGC  |
| ENSG00000089902 | AAGGCAC  |
| ENSG00000089902 | AAGGUGC  |
| ENSG00000089902 | AAUUAUU  |
| ENSG00000089902 | ACAAGGU  |
| ENSG00000089902 | ACAUCAC  |
| ENSG00000089902 | ACUGUUU  |
| ENSG00000089902 | AGCACCA  |
| ENSG00000089902 | AGUAACA  |
| ENSG00000089902 | AUAUAAC  |
| ENSG00000089902 | AUGGCUU  |
| ENSG00000089902 | CAGUAGU  |
| ENSG00000089902 | CUUGGAG  |
| ENSG00000089902 | CUUUGGU  |
| ENSG00000089902 | GAAAACA  |
| ENSG00000089902 | GCAGAAG  |
| ENSG00000089902 | GGAGGAG  |
| ENSG00000089902 | GUAAACA  |
| ENSG00000089902 | GUGCUUG  |
| ENSG00000089902 | UAUAAUA  |
| ENSG00000089902 | UCAAGUA  |
| ENSG00000089902 | UCACAUU  |
| ENSG00000089902 | UGCAUAG  |
| ENSG00000089902 | UGGAUAA  |
| ENSG00000089902 | UUCUGCA  |
| ENSG00000089902 | UUUUUGC  |
| ENSG00000089916 | UUGGCAC  |
| ENSG00000090020 | AGCAGCU  |
| ENSG00000090020 | AGCUGCC  |
| ENSG00000090020 | GGUUGUC  |
| ENSG00000090020 | GUGCAAA  |
| ENSG00000090020 | UUGGUUC  |
| ENSG00000090054 | AAGGCAC  |
| ENSG00000090054 | AAUUAUU  |
| ENSG00000090054 | AAUUUUA  |
| ENSG00000090054 | AGCAGCA  |
| ENSG00000090054 | UCACAAG  |
| ENSG00000090060 | AAAAGUA  |
| ENSG00000090060 | AACCUGU  |
| ENSG00000090060 | AAGUCAC  |
| ENSG00000090060 | AAGUGCA  |
| ENSG00000090060 | ACAAGGU  |
| ENSG00000090060 | ACCUGGA  |
| ENSG00000090060 | ACUCCAG  |

|                |         |
|----------------|---------|
| ENSG0000090060 | CAAAGCA |
| ENSG0000090060 | CCCUGAG |
| ENSG0000090060 | CUGGACU |
| ENSG0000090060 | GACUUCC |
| ENSG0000090060 | GGAGUGU |
| ENSG0000090060 | UACAAAG |
| ENSG0000090061 | AAAGUAA |
| ENSG0000090061 | ACAGUAU |
| ENSG0000090061 | CACAGUG |
| ENSG0000090061 | CCAGUGC |
| ENSG0000090061 | CCUGCUG |
| ENSG0000090061 | UCACACA |
| ENSG0000090061 | UCUAGAG |
| ENSG0000090061 | UUUGCAA |
| ENSG0000090097 | AAAACUG |
| ENSG0000090097 | AAACUGU |
| ENSG0000090097 | AGCAGCA |
| ENSG0000090097 | GAGAACU |
| ENSG0000090097 | GGAGUCC |
| ENSG0000090097 | UCCAGUU |
| ENSG0000090097 | UGAGAAU |
| ENSG0000090104 | UCACAGU |
| ENSG0000090238 | CAGUGCA |
| ENSG0000090238 | UCACAGU |
| ENSG0000090269 | UAUGGUU |
| ENSG0000090316 | AAAGUAC |
| ENSG0000090316 | ACAUUCA |
| ENSG0000090316 | CUUUGGU |
| ENSG0000090316 | GAGUAUU |
| ENSG0000090316 | UACAAAG |
| ENSG0000090316 | UUCAAGC |
| ENSG0000090372 | AGCACCA |
| ENSG0000090372 | CACCACC |
| ENSG0000090372 | CAGGAAC |
| ENSG0000090372 | CCUUCUG |
| ENSG0000090372 | GAGGCUG |
| ENSG0000090372 | GGGUUUA |
| ENSG0000090372 | UAUAAAG |
| ENSG0000090432 | CCCUGAG |
| ENSG0000090447 | AAAAAUC |
| ENSG0000090447 | AAGGCAC |
| ENSG0000090447 | AAGUGCA |
| ENSG0000090447 | ACAGUAC |
| ENSG0000090447 | AGUGCUU |
| ENSG0000090447 | AUAAUAC |
| ENSG0000090447 | UACAGUU |
| ENSG0000090447 | UAUAAUA |
| ENSG0000090470 | CAAAACU |
| ENSG0000090470 | GUCACUC |
| ENSG0000090520 | AGCACCA |
| ENSG0000090530 | AACAUUC |
| ENSG0000090530 | AACCUGG |
| ENSG0000090530 | GUUAAUG |
| ENSG0000090539 | AGCCAGU |
| ENSG0000090539 | CUCAGGG |
| ENSG0000090539 | CUGCUCA |
| ENSG0000090565 | AAAAAUC |
| ENSG0000090565 | AAAGUAU |
| ENSG0000090565 | AAUCUCU |
| ENSG0000090565 | UACAGUU |
| ENSG0000090565 | UUGAUCA |
| ENSG0000090581 | AGCAUUC |
| ENSG0000090615 | AAAGCUG |
| ENSG0000090615 | AAAGUAA |

|                 |          |
|-----------------|----------|
| ENSG00000090615 | AAAGUUU  |
| ENSG00000090615 | ACUCAA   |
| ENSG00000090615 | ACUGUUU  |
| ENSG00000090615 | CAGACAG  |
| ENSG00000090615 | CCUGUAC  |
| ENSG00000090615 | UAAUGCU  |
| ENSG00000090615 | UAUAAUA  |
| ENSG00000090615 | UAUUGCU  |
| ENSG00000090615 | UCUCAA   |
| ENSG00000090615 | UGGAGAU  |
| ENSG00000090615 | UUCAAA   |
| ENSG00000090615 | UUCAAGC  |
| ENSG00000090615 | UUCUAAU  |
| ENSG00000090615 | UUUCAAC  |
| ENSG00000090659 | AGUGGUU  |
| ENSG00000090659 | GCAACUU  |
| ENSG00000090659 | GCUGGAU  |
| ENSG00000090659 | GUGAAUG  |
| ENSG00000090661 | CCCUGUC  |
| ENSG00000090686 | AAGGCAC  |
| ENSG00000090686 | AGUGCAA  |
| ENSG00000090686 | CUCUUCC  |
| ENSG00000090686 | GAAACAU  |
| ENSG00000090686 | UGAAAGG  |
| ENSG00000090686 | UGACAUC  |
| ENSG00000090686 | UUGACAC  |
| ENSG00000090776 | AAAAACC  |
| ENSG00000090776 | AAAGUGC  |
| ENSG00000090776 | AAGGCAC  |
| ENSG00000090776 | AAGUGCA  |
| ENSG00000090776 | ACAUUAC  |
| ENSG00000090776 | ACCUGGA  |
| ENSG00000090776 | AGCAGCU  |
| ENSG00000090776 | AGGCAGG  |
| ENSG00000090776 | AGGGAGG  |
| ENSG00000090776 | AUACAAG  |
| ENSG00000090776 | CAAAGUG  |
| ENSG00000090776 | CAAGAGC  |
| ENSG00000090776 | CAGCUGG  |
| ENSG00000090776 | CCAGGAG  |
| ENSG00000090776 | CCCACCU  |
| ENSG00000090776 | CUACAAA  |
| ENSG00000090776 | CUCCAC   |
| ENSG00000090776 | CUCUGGG  |
| ENSG00000090776 | CUCUUCC  |
| ENSG00000090776 | CUGCAGC  |
| ENSG00000090776 | CUGCAGG  |
| ENSG00000090776 | CUGGGCA  |
| ENSG00000090776 | GAGGCAG  |
| ENSG00000090776 | GCUUCCU  |
| ENSG00000090776 | GGAGGCA  |
| ENSG00000090776 | GGCAAGA  |
| ENSG00000090776 | GGCAGGG  |
| ENSG00000090776 | GGGGGAA  |
| ENSG00000090776 | UAAGACG  |
| ENSG00000090776 | UAAGACU  |
| ENSG00000090776 | UACAAAG  |
| ENSG00000090776 | UAUAAAG  |
| ENSG00000090776 | UCCACC   |
| ENSG00000090776 | UUCUAAU  |
| ENSG00000090857 | AGCAAAA  |
| ENSG00000090857 | AGCAGCA  |
| ENSG00000090857 | CCCUGAG  |
| ENSG00000090857 | GAGGUAAU |

|                 |          |
|-----------------|----------|
| ENSG00000090857 | GCUUCCU  |
| ENSG00000090857 | GGCAAGA  |
| ENSG00000090857 | GUGAGGU  |
| ENSG00000090889 | AACAUUC  |
| ENSG00000090889 | CUGCUC A |
| ENSG00000090905 | AAAGUGC  |
| ENSG00000090905 | AAGUGCA  |
| ENSG00000090905 | AAGUGCU  |
| ENSG00000090905 | ACAGU AU |
| ENSG00000090905 | AGUGCAA  |
| ENSG00000090905 | AUACAAG  |
| ENSG00000090905 | CUCCAGC  |
| ENSG00000090905 | GGAAGAC  |
| ENSG00000090905 | GUGCAAA  |
| ENSG00000090905 | UCCUGAG  |
| ENSG00000090905 | UGCAAAG  |
| ENSG00000090905 | UGCAUAG  |
| ENSG00000090905 | UGGCCAC  |
| ENSG00000090905 | UUGGCAA  |
| ENSG00000090905 | UUGGCAC  |
| ENSG00000090924 | AACAAAC  |
| ENSG00000090971 | CAGUGCA  |
| ENSG00000090975 | AGCACCA  |
| ENSG00000090975 | AGGCAGG  |
| ENSG00000090975 | AGUGCAA  |
| ENSG00000090975 | AGUGCUG  |
| ENSG00000090975 | AUUGCAC  |
| ENSG00000090975 | CACAGUG  |
| ENSG00000090975 | CAGUUAC  |
| ENSG00000090975 | CUUUGGU  |
| ENSG00000090975 | GAAACAU  |
| ENSG00000090975 | GAGGGGC  |
| ENSG00000090975 | GAUUGUA  |
| ENSG00000090975 | GAUUGUC  |
| ENSG00000090975 | GCACCAU  |
| ENSG00000090975 | GCUACAU  |
| ENSG00000090975 | GGGUGUU  |
| ENSG00000090975 | GUGCAAA  |
| ENSG00000090975 | UAUUGCU  |
| ENSG00000090975 | UCACACA  |
| ENSG00000090975 | UCACAGU  |
| ENSG00000090975 | UUGGUCC  |
| ENSG00000090975 | UUGGUUC  |
| ENSG00000091009 | AACAUUC  |
| ENSG00000091009 | AAUUAUU  |
| ENSG00000091009 | ACUCAA A |
| ENSG00000091009 | GUAGUGU  |
| ENSG00000091009 | UAAUACA  |
| ENSG00000091009 | UCCCUCU  |
| ENSG00000091039 | ACAAUAU  |
| ENSG00000091039 | AUGGCAC  |
| ENSG00000091039 | CAAAACU  |
| ENSG00000091039 | CACUGUU  |
| ENSG00000091039 | CAGUCCA  |
| ENSG00000091039 | GGA AUGU |
| ENSG00000091039 | UAUUGCU  |
| ENSG00000091039 | UCAUUUG  |
| ENSG00000091039 | UCCUAUA  |
| ENSG00000091039 | UCCUGAG  |
| ENSG00000091073 | AUUGCAC  |
| ENSG00000091073 | GAGGU AU |
| ENSG00000091073 | UAUUGCU  |
| ENSG00000091073 | UGCAAAG  |
| ENSG00000091127 | AAGGCAC  |

|                 |          |
|-----------------|----------|
| ENSG00000091128 | CUCCAGC  |
| ENSG00000091129 | AACACUG  |
| ENSG00000091129 | AAGACAU  |
| ENSG00000091129 | AAGGCAC  |
| ENSG00000091129 | CAGCAA   |
| ENSG00000091129 | GCCUGU   |
| ENSG00000091137 | AACAAAC  |
| ENSG00000091137 | UCAAGUA  |
| ENSG00000091137 | UUCAAGC  |
| ENSG00000091140 | AAAGUUU  |
| ENSG00000091140 | CAGUCCA  |
| ENSG00000091140 | GAAACAU  |
| ENSG00000091140 | UAAGACU  |
| ENSG00000091140 | UUCUAAU  |
| ENSG00000091140 | UGAUCA   |
| ENSG00000091157 | AGUGCUG  |
| ENSG00000091157 | GAGGCAG  |
| ENSG00000091157 | UCACAGU  |
| ENSG00000091164 | CCAGUGU  |
| ENSG00000091164 | GUCUCUG  |
| ENSG00000091317 | CUUUGGU  |
| ENSG00000091317 | GAAACAU  |
| ENSG00000091317 | GAGAAAU  |
| ENSG00000091317 | GCAGAAG  |
| ENSG00000091409 | ACAUUCA  |
| ENSG00000091409 | ACUGUAG  |
| ENSG00000091409 | AGCACCA  |
| ENSG00000091409 | CAGUAGA  |
| ENSG00000091409 | CAGUAGU  |
| ENSG00000091482 | AUAUAAC  |
| ENSG00000091527 | AACACUG  |
| ENSG00000091527 | AAGUUGU  |
| ENSG00000091527 | ACUGGCU  |
| ENSG00000091527 | AGCAGCA  |
| ENSG00000091527 | AGGUAGU  |
| ENSG00000091527 | CAGCAA   |
| ENSG00000091527 | CAGUAGA  |
| ENSG00000091527 | CCAGCAU  |
| ENSG00000091527 | CCAGUAC  |
| ENSG00000091527 | GAGGUAU  |
| ENSG00000091527 | GCAGCAU  |
| ENSG00000091527 | GCCUGAU  |
| ENSG00000091527 | GGAUUUC  |
| ENSG00000091527 | UCACAAG  |
| ENSG00000091527 | UGAGAAU  |
| ENSG00000091527 | UGAUCCA  |
| ENSG00000091527 | UUGGCAA  |
| ENSG00000091527 | UUGGCAC  |
| ENSG00000091542 | AAGUGCU  |
| ENSG00000091542 | ACUGGCC  |
| ENSG00000091542 | ACUUGGA  |
| ENSG00000091542 | AGCAAAA  |
| ENSG00000091542 | AGUGCUG  |
| ENSG00000091542 | AUAUUUAU |
| ENSG00000091542 | CUACAAA  |
| ENSG00000091542 | CUCUAGC  |
| ENSG00000091542 | GCAACUU  |
| ENSG00000091542 | UCCAUA   |
| ENSG00000091542 | UUGGUUC  |
| ENSG00000091640 | AGCAGCA  |
| ENSG00000091640 | AGCAGCG  |
| ENSG00000091640 | AGCAGCU  |
| ENSG00000091640 | AUAUAC   |
| ENSG00000091640 | UAAUACA  |

|                 |          |
|-----------------|----------|
| ENSG00000091640 | UCACACA  |
| ENSG00000091651 | GGAAGCC  |
| ENSG00000091656 | AAAGCUG  |
| ENSG00000091656 | AACAGUC  |
| ENSG00000091656 | AAGUCAC  |
| ENSG00000091656 | AAGUGCA  |
| ENSG00000091656 | AAGUGCU  |
| ENSG00000091656 | AAUACUG  |
| ENSG00000091656 | AAUGUUG  |
| ENSG00000091656 | AAUUAUU  |
| ENSG00000091656 | AAUUUUA  |
| ENSG00000091656 | ACAAUUA  |
| ENSG00000091656 | ACAUUAC  |
| ENSG00000091656 | ACAUUCA  |
| ENSG00000091656 | ACUGCAG  |
| ENSG00000091656 | ACUGUAG  |
| ENSG00000091656 | AGCAGCA  |
| ENSG00000091656 | AGCAGCG  |
| ENSG00000091656 | AGCAUUC  |
| ENSG00000091656 | AGUAACA  |
| ENSG00000091656 | AUAAAAGU |
| ENSG00000091656 | AUAAUAC  |
| ENSG00000091656 | AUACAAG  |
| ENSG00000091656 | AUAU AAC |
| ENSG00000091656 | AUCCCUU  |
| ENSG00000091656 | AUGACAC  |
| ENSG00000091656 | AUGUAAU  |
| ENSG00000091656 | AUUGCAC  |
| ENSG00000091656 | CAAAGCA  |
| ENSG00000091656 | CAA AUGC |
| ENSG00000091656 | CACACCU  |
| ENSG00000091656 | CACAGGG  |
| ENSG00000091656 | CACAGUG  |
| ENSG00000091656 | CACUGUU  |
| ENSG00000091656 | CAGCAAA  |
| ENSG00000091656 | CAUAUUG  |
| ENSG00000091656 | CCAGCAU  |
| ENSG00000091656 | CCAGGAG  |
| ENSG00000091656 | CCUUCUG  |
| ENSG00000091656 | CUCACAC  |
| ENSG00000091656 | CUCAGGG  |
| ENSG00000091656 | CUUACAG  |
| ENSG00000091656 | CUUCACC  |
| ENSG00000091656 | CUUUGGU  |
| ENSG00000091656 | GACAACU  |
| ENSG00000091656 | GACCUGG  |
| ENSG00000091656 | GAGGCUG  |
| ENSG00000091656 | GAGUUGG  |
| ENSG00000091656 | GCACCAU  |
| ENSG00000091656 | GGAAUGU  |
| ENSG00000091656 | GGAGGCA  |
| ENSG00000091656 | GGCAAGA  |
| ENSG00000091656 | GGCAGUG  |
| ENSG00000091656 | GGCUGCG  |
| ENSG00000091656 | GGUCUAG  |
| ENSG00000091656 | GGUUUAC  |
| ENSG00000091656 | GUAACAG  |
| ENSG00000091656 | GUGACAG  |
| ENSG00000091656 | GUUAGGA  |
| ENSG00000091656 | GUUCAUG  |
| ENSG00000091656 | UACAAAG  |
| ENSG00000091656 | UAUAUGA  |
| ENSG00000091656 | UCACAGU  |
| ENSG00000091656 | UCAUGAU  |

|                 |          |
|-----------------|----------|
| ENSG00000091656 | UCCAGAG  |
| ENSG00000091656 | UCCAGUU  |
| ENSG00000091656 | UCCUCU   |
| ENSG00000091656 | UCCUUU   |
| ENSG00000091656 | UCCUGAG  |
| ENSG00000091656 | UCUCAAG  |
| ENSG00000091656 | UGAAAUG  |
| ENSG00000091656 | UGAGAAU  |
| ENSG00000091656 | UGCAUUAU |
| ENSG00000091656 | UGCAUUG  |
| ENSG00000091656 | UGGUACC  |
| ENSG00000091656 | UUAGAGA  |
| ENSG00000091656 | UUAUGCA  |
| ENSG00000091656 | UUCAAGC  |
| ENSG00000091656 | UUCCUAG  |
| ENSG00000091656 | UUGGAGG  |
| ENSG00000091656 | UUGGCAC  |
| ENSG00000091656 | UUGGUUC  |
| ENSG00000091656 | UUGUGAC  |
| ENSG00000091656 | UUGUUCG  |
| ENSG00000091656 | UUUGCAA  |
| ENSG00000091656 | UUUGCAC  |
| ENSG00000091656 | UUUUUGC  |
| ENSG00000091664 | CAAAGCA  |
| ENSG00000091831 | AAAGAGG  |
| ENSG00000091831 | AAGAACC  |
| ENSG00000091831 | ACAUUCA  |
| ENSG00000091831 | ACCCAUU  |
| ENSG00000091831 | ACUGUGU  |
| ENSG00000091831 | AGCAAAA  |
| ENSG00000091831 | AGUGCUG  |
| ENSG00000091831 | AUACAAG  |
| ENSG00000091831 | AUAUAAC  |
| ENSG00000091831 | AUAUUAU  |
| ENSG00000091831 | CAAAGCA  |
| ENSG00000091831 | CAGUGCA  |
| ENSG00000091831 | CUUGUAU  |
| ENSG00000091831 | GAGAAAU  |
| ENSG00000091831 | GAUAUGU  |
| ENSG00000091831 | GAUUGUC  |
| ENSG00000091831 | GCCCUGU  |
| ENSG00000091831 | GGAGUGU  |
| ENSG00000091831 | GGCAGCG  |
| ENSG00000091831 | GGUUUAC  |
| ENSG00000091831 | UCCAGUU  |
| ENSG00000091831 | UCCUUU   |
| ENSG00000091831 | UCCUAUA  |
| ENSG00000091831 | UGAAAUG  |
| ENSG00000091831 | UGCCUG   |
| ENSG00000091831 | UGUCUGC  |
| ENSG00000091831 | UGUCUGG  |
| ENSG00000091844 | CACAGUG  |
| ENSG00000091844 | CAGGAAC  |
| ENSG00000091844 | UCACAGG  |
| ENSG00000091879 | AAGUCAC  |
| ENSG00000091879 | GUGACAG  |
| ENSG00000091879 | UUGUGAC  |
| ENSG00000091972 | AGUAGAC  |
| ENSG00000091972 | AUAUAAC  |
| ENSG00000091986 | AAAGUUU  |
| ENSG00000091986 | AGGCAGG  |
| ENSG00000092020 | AGCAUUC  |
| ENSG00000092051 | AGCCCUU  |
| ENSG00000092051 | AGGCAGG  |



|                 |         |
|-----------------|---------|
| ENSG00000092051 | AGGGAGG |
| ENSG00000092051 | AUGUAAU |
| ENSG00000092051 | CACUGUU |
| ENSG00000092051 | CCUUCAU |
| ENSG00000092051 | CUGACUC |
| ENSG00000092051 | GGAGGCA |
| ENSG00000092051 | GUCCAGA |
| ENSG00000092051 | UAAUAUC |
| ENSG00000092051 | UCUAGAG |
| ENSG00000092068 | AAAAGUA |
| ENSG00000092068 | AAAGUAA |
| ENSG00000092068 | AAGGCAC |
| ENSG00000092068 | AAUUUUA |
| ENSG00000092068 | ACAUCAC |
| ENSG00000092068 | ACCAGCA |
| ENSG00000092068 | CUUUGGU |
| ENSG00000092068 | GGCGGGG |
| ENSG00000092068 | UACAAAG |
| ENSG00000092068 | UAUUACC |
| ENSG00000092068 | UGGGUAC |
| ENSG00000092068 | UCCAUUA |
| ENSG00000092068 | UUCUGCA |
| ENSG00000092068 | UUGGCAA |
| ENSG00000092068 | UUGGCAC |
| ENSG00000092068 | UUGGUCC |
| ENSG00000092096 | AGGGAGG |
| ENSG00000092096 | GAAACAU |
| ENSG00000092096 | GGAGGAG |
| ENSG00000092098 | GCUGGAU |
| ENSG00000092098 | UCCUGAG |
| ENSG00000092108 | AAAAAUC |
| ENSG00000092148 | AACACUG |
| ENSG00000092148 | AAGUGUG |
| ENSG00000092148 | ACUGUAG |
| ENSG00000092148 | AGCAAAA |
| ENSG00000092148 | AGCAGCA |
| ENSG00000092148 | AGCAGCG |
| ENSG00000092148 | AGUGCAA |
| ENSG00000092148 | AGUGUGC |
| ENSG00000092148 | AUAAUAC |
| ENSG00000092148 | AUACAAG |
| ENSG00000092148 | CAGCAAA |
| ENSG00000092199 | AAAGAAU |
| ENSG00000092199 | AAAGAGC |
| ENSG00000092199 | AAAGCUG |
| ENSG00000092199 | AAGUCAC |
| ENSG00000092199 | ACAGUUA |
| ENSG00000092199 | AUCCUUU |
| ENSG00000092199 | CAGGCUC |
| ENSG00000092199 | GGUUUAC |
| ENSG00000092199 | GUAACAG |
| ENSG00000092199 | UAAGACG |
| ENSG00000092199 | UAGAGGA |
| ENSG00000092199 | UCACAAG |
| ENSG00000092199 | UGGAGAU |
| ENSG00000092199 | UGUUGAA |
| ENSG00000092199 | UUCUAAU |
| ENSG00000092199 | UUGAUCA |
| ENSG00000092199 | UUGGAGG |
| ENSG00000092201 | AAAGCUG |
| ENSG00000092201 | AAGUCAC |
| ENSG00000092201 | ACAGGUG |
| ENSG00000092201 | AGCAGCA |
| ENSG00000092201 | GAUUGGU |

|                 |         |
|-----------------|---------|
| ENSG00000092201 | GCCUGGA |
| ENSG00000092201 | GGUGGGC |
| ENSG00000092201 | UACAGUU |
| ENSG00000092201 | UUGGUCC |
| ENSG00000092203 | ACUGGCU |
| ENSG00000092203 | CAGCAA  |
| ENSG00000092203 | CAGCAGA |
| ENSG00000092203 | CUAGGCU |
| ENSG00000092203 | CUUCACC |
| ENSG00000092203 | CUUGGAG |
| ENSG00000092203 | CUUUGGU |
| ENSG00000092203 | GGCCUG  |
| ENSG00000092203 | UGGCCU  |
| ENSG00000092208 | AGCACCA |
| ENSG00000092345 | GAUUGGU |
| ENSG00000092345 | UUCAAAU |
| ENSG00000092421 | AACAGUC |
| ENSG00000092421 | AAGUCUU |
| ENSG00000092421 | AAUUAUU |
| ENSG00000092421 | ACAUCAC |
| ENSG00000092421 | ACAUUAC |
| ENSG00000092421 | AGCCUGC |
| ENSG00000092421 | AUGACAC |
| ENSG00000092421 | AUGGAUU |
| ENSG00000092421 | CACAAUG |
| ENSG00000092421 | CACAGUG |
| ENSG00000092421 | CAGACAG |
| ENSG00000092421 | CAGCAGG |
| ENSG00000092421 | CAGUCCA |
| ENSG00000092421 | CCAGCAU |
| ENSG00000092421 | CCAGUGU |
| ENSG00000092421 | CUCACAC |
| ENSG00000092421 | CUUCACC |
| ENSG00000092421 | GCAGCAU |
| ENSG00000092421 | GCUGGUG |
| ENSG00000092421 | GCUGUCU |
| ENSG00000092421 | GGCAUUG |
| ENSG00000092421 | GGCUCAG |
| ENSG00000092421 | GUAACAG |
| ENSG00000092421 | GUUAAUG |
| ENSG00000092421 | GUUAGGA |
| ENSG00000092421 | UAUUACC |
| ENSG00000092421 | UCACACA |
| ENSG00000092421 | UGAAAUG |
| ENSG00000092421 | UGACAUC |
| ENSG00000092421 | UGGAGAU |
| ENSG00000092421 | UUAUGCA |
| ENSG00000092421 | UUGGCAC |
| ENSG00000092439 | AUGGCUU |
| ENSG00000092445 | AAUUUA  |
| ENSG00000092445 | ACCACAG |
| ENSG00000092445 | CAGACAG |
| ENSG00000092445 | UGCCAGC |
| ENSG00000092445 | UGGGACA |
| ENSG00000092529 | AUGCCUU |
| ENSG00000092529 | CAGACAG |
| ENSG00000092529 | GAGGUAG |
| ENSG00000092529 | GAGGUAU |
| ENSG00000092529 | UCCUGAG |
| ENSG00000092531 | CUUUGGU |
| ENSG00000092531 | GAGGUAG |
| ENSG00000092531 | GAGGUAU |
| ENSG00000092531 | UUGGCAC |
| ENSG00000092607 | AUUCAUU |

|                 |          |
|-----------------|----------|
| ENSG00000092607 | CGUGCAU  |
| ENSG00000092607 | CUACAAA  |
| ENSG00000092607 | UAAUAUC  |
| ENSG00000092607 | UAUUGCU  |
| ENSG00000092607 | UGCAUUG  |
| ENSG00000092607 | UGGAGAU  |
| ENSG00000092607 | UGGCUGC  |
| ENSG00000092607 | UGUGCUU  |
| ENSG00000092607 | UUGGCAC  |
| ENSG00000092758 | GAGGUAG  |
| ENSG00000092758 | GAGGUAU  |
| ENSG00000092847 | AAAGGUA  |
| ENSG00000092847 | AAGGCAC  |
| ENSG00000092847 | AAGUGCU  |
| ENSG00000092847 | ACCCAUI  |
| ENSG00000092847 | AGAUGUG  |
| ENSG00000092847 | AGCAAAA  |
| ENSG00000092847 | AGCAGCA  |
| ENSG00000092847 | AGCAGCU  |
| ENSG00000092847 | AGGACAC  |
| ENSG00000092847 | AGUAGAC  |
| ENSG00000092847 | AGUGCCG  |
| ENSG00000092847 | AUGGAUU  |
| ENSG00000092847 | CACCAGC  |
| ENSG00000092847 | CAGCAAA  |
| ENSG00000092847 | CAGCAGA  |
| ENSG00000092847 | CAGCAGG  |
| ENSG00000092847 | CAGCUGG  |
| ENSG00000092847 | CCAGUGC  |
| ENSG00000092847 | CCAGUGU  |
| ENSG00000092847 | CUACAAA  |
| ENSG00000092847 | CUCCCAC  |
| ENSG00000092847 | CUGGCUC  |
| ENSG00000092847 | CUGGGGG  |
| ENSG00000092847 | CUUGUGU  |
| ENSG00000092847 | GAAACAU  |
| ENSG00000092847 | GAGCUGC  |
| ENSG00000092847 | GAGGUAG  |
| ENSG00000092847 | GAGGUAU  |
| ENSG00000092847 | GCAGCAU  |
| ENSG00000092847 | GCUUCCU  |
| ENSG00000092847 | GGAAGAC  |
| ENSG00000092847 | GGAAUGU  |
| ENSG00000092847 | GGAGAGA  |
| ENSG00000092847 | GGAGUGU  |
| ENSG00000092847 | GGAUUUC  |
| ENSG00000092847 | GGUGGUU  |
| ENSG00000092847 | GGUUACC  |
| ENSG00000092847 | GUAAACA  |
| ENSG00000092847 | GUAACAG  |
| ENSG00000092847 | GUGAAUG  |
| ENSG00000092847 | GUGAGGU  |
| ENSG00000092847 | GUGCAAA  |
| ENSG00000092847 | UAUAAAAG |
| ENSG00000092847 | UCCCUCU  |
| ENSG00000092847 | UGCAUAG  |
| ENSG00000092847 | UGCAUAI  |
| ENSG00000092847 | UGUGCUU  |
| ENSG00000092847 | UUCUGCA  |
| ENSG00000092847 | UUGGCAA  |
| ENSG00000092847 | UUGGCAC  |
| ENSG00000092847 | UUGGUCC  |
| ENSG00000092847 | UUUGCAA  |
| ENSG00000092847 | UUUGCAC  |

|                 |          |
|-----------------|----------|
| ENSG00000092871 | AACAAAC  |
| ENSG00000092871 | AAUCUCA  |
| ENSG00000092871 | AGCUUAU  |
| ENSG00000092871 | AGUGGUU  |
| ENSG00000092871 | AUAAAGU  |
| ENSG00000092871 | CAGCAGA  |
| ENSG00000092871 | GUAACAG  |
| ENSG00000092871 | GUGCUUG  |
| ENSG00000092871 | UACAAAG  |
| ENSG00000092871 | UAUUACC  |
| ENSG00000092871 | UGCAUAG  |
| ENSG00000092871 | UGCAUUA  |
| ENSG00000092871 | UGUGCUU  |
| ENSG00000092931 | ACUCCAG  |
| ENSG00000092931 | GUAAACA  |
| ENSG00000092931 | UCCCUUU  |
| ENSG00000092964 | AAAUCCC  |
| ENSG00000092964 | ACACACC  |
| ENSG00000092964 | ACAUUCA  |
| ENSG00000092964 | ACUGCAG  |
| ENSG00000092964 | ACUGGCU  |
| ENSG00000092964 | AGCACCA  |
| ENSG00000092964 | AGCAUUC  |
| ENSG00000092964 | AGGAUGU  |
| ENSG00000092964 | AGUGGUU  |
| ENSG00000092964 | AUAU AAC |
| ENSG00000092964 | AUAUUAU  |
| ENSG00000092964 | CACAGGG  |
| ENSG00000092964 | CAGCAA A |
| ENSG00000092964 | CAGGCUC  |
| ENSG00000092964 | CAGGUGA  |
| ENSG00000092964 | GAAACAU  |
| ENSG00000092964 | GAGCUGC  |
| ENSG00000092964 | GCAGGUU  |
| ENSG00000092964 | GGAAGAC  |
| ENSG00000092964 | GGCUGCG  |
| ENSG00000092964 | GUCCAGA  |
| ENSG00000092964 | UCACAGG  |
| ENSG00000092964 | UCCAGUU  |
| ENSG00000092964 | UGGCUGC  |
| ENSG00000092964 | UUAGAGA  |
| ENSG00000092964 | UUAGGAU  |
| ENSG00000092964 | UUCAAAU  |
| ENSG00000092978 | GCACCAU  |
| ENSG00000093000 | AAUCACU  |
| ENSG00000093000 | ACCCUGU  |
| ENSG00000093000 | AGCAGCG  |
| ENSG00000093000 | AGCAGCU  |
| ENSG00000093000 | AUGGAUU  |
| ENSG00000093000 | CCCUGAG  |
| ENSG00000093000 | GACCCUG  |
| ENSG00000093000 | GGAAUGU  |
| ENSG00000093000 | UCUUGAG  |
| ENSG00000093000 | UUGGCAC  |
| ENSG00000093072 | GCCCUGU  |
| ENSG00000093134 | AUGUGCC  |
| ENSG00000093134 | CUUGUAU  |
| ENSG00000093134 | UUCCAUA  |
| ENSG00000093167 | AAGGCAC  |
| ENSG00000093183 | ACAUCAC  |
| ENSG00000094796 | UCCUUGC  |
| ENSG00000094804 | UCACAAG  |
| ENSG00000094880 | AAGUGCU  |
| ENSG00000094880 | AAUCUCA  |

|                 |          |
|-----------------|----------|
| ENSG00000094880 | AAUCUCU  |
| ENSG00000094880 | AGCAGCA  |
| ENSG00000094880 | GCAGCAU  |
| ENSG00000094963 | CACAAUG  |
| ENSG00000094963 | GAGUCUU  |
| ENSG00000094963 | GGAUUUU  |
| ENSG00000094963 | GGCAUUG  |
| ENSG00000094975 | AAGGCAC  |
| ENSG00000094975 | AAGGUGC  |
| ENSG00000094975 | AAGUGCU  |
| ENSG00000094975 | CACAGUG  |
| ENSG00000094975 | UCACAGG  |
| ENSG00000094975 | UCACAUU  |
| ENSG00000094975 | UUGACAC  |
| ENSG00000095015 | AAGGCAC  |
| ENSG00000095015 | ACUGGCU  |
| ENSG00000095015 | CAGUCCA  |
| ENSG00000095015 | CUACAAA  |
| ENSG00000095015 | CUUUGGU  |
| ENSG00000095015 | GAGUCUU  |
| ENSG00000095015 | GGAAUGU  |
| ENSG00000095015 | GGCAAGA  |
| ENSG00000095015 | UAUAAAAG |
| ENSG00000095015 | UGAGAAU  |
| ENSG00000095015 | UGAGUCU  |
| ENSG00000095066 | UCACAUU  |
| ENSG00000095139 | AAAACUG  |
| ENSG00000095139 | AAAAGUA  |
| ENSG00000095139 | AAAGUAA  |
| ENSG00000095139 | CAAAACU  |
| ENSG00000095139 | CCCUGAG  |
| ENSG00000095139 | CCUGCUG  |
| ENSG00000095139 | CUUUGGU  |
| ENSG00000095139 | GUGAAUG  |
| ENSG00000095139 | UAUAAUA  |
| ENSG00000095139 | UAUCAGA  |
| ENSG00000095139 | UAUUACC  |
| ENSG00000095139 | UCCCUUG  |
| ENSG00000095139 | UCCUUGC  |
| ENSG00000095139 | UUCUUGU  |
| ENSG00000095139 | UUGGCAC  |
| ENSG00000095203 | AAGGCAC  |
| ENSG00000095203 | ACAUUCA  |
| ENSG00000095203 | AGCAGCA  |
| ENSG00000095203 | AGCAGCG  |
| ENSG00000095203 | AGCAGCU  |
| ENSG00000095203 | AGCUGCC  |
| ENSG00000095203 | AGGCAGG  |
| ENSG00000095203 | CAAGAGC  |
| ENSG00000095203 | GCUGGUG  |
| ENSG00000095203 | GGCAGGG  |
| ENSG00000095203 | UACAGUU  |
| ENSG00000095203 | UGCAAAG  |
| ENSG00000095203 | UGGAGAU  |
| ENSG00000095203 | UUGGCAC  |
| ENSG00000095209 | UCACAUU  |
| ENSG00000095261 | AAGGCAC  |
| ENSG00000095303 | AGCUGCC  |
| ENSG00000095303 | GACCCUG  |
| ENSG00000095321 | AAGGCAC  |
| ENSG00000095370 | AAAAGUA  |
| ENSG00000095370 | AAAGUUU  |
| ENSG00000095397 | AUAUAAC  |
| ENSG00000095397 | CUCUGGG  |

|                 |         |
|-----------------|---------|
| ENSG00000095485 | AAAGAGG |
| ENSG00000095485 | AACAGUC |
| ENSG00000095485 | AAUGUUG |
| ENSG00000095485 | AGGCAGG |
| ENSG00000095485 | GAGGCAG |
| ENSG00000095485 | GGCAGGG |
| ENSG00000095485 | UCCCUUG |
| ENSG00000095485 | UCCCUUU |
| ENSG00000095539 | AAAGUGC |
| ENSG00000095539 | AGGACAC |
| ENSG00000095539 | AUGUGCC |
| ENSG00000095539 | AUUCAUU |
| ENSG00000095539 | CAGGCUC |
| ENSG00000095539 | CCCACCU |
| ENSG00000095539 | CUACAAA |
| ENSG00000095539 | CUGCAGC |
| ENSG00000095539 | CUGCCCC |
| ENSG00000095539 | GAGCCCU |
| ENSG00000095539 | GAGGCUG |
| ENSG00000095539 | GAGGUAG |
| ENSG00000095539 | GAGGUAU |
| ENSG00000095539 | GAUUGUA |
| ENSG00000095539 | GAUUGUC |
| ENSG00000095539 | GCCCUUA |
| ENSG00000095539 | GCCUGGA |
| ENSG00000095539 | GGACCUG |
| ENSG00000095539 | GGAGGAG |
| ENSG00000095539 | GGCUCAG |
| ENSG00000095539 | GUGAGGU |
| ENSG00000095539 | GUGCCAC |
| ENSG00000095539 | UGCAUUA |
| ENSG00000095564 | CAGCAGG |
| ENSG00000095564 | GGAAUGU |
| ENSG00000095587 | AAAGCUG |
| ENSG00000095587 | AAUGCCC |
| ENSG00000095587 | ACCACAG |
| ENSG00000095587 | AUGCAUU |
| ENSG00000095587 | AUGUAAU |
| ENSG00000095587 | CAAAACU |
| ENSG00000095587 | GGGAGCU |
| ENSG00000095587 | UUUGCAC |
| ENSG00000095627 | GAGGCAG |
| ENSG00000095637 | AAAUGGU |
| ENSG00000095637 | AAUUAUU |
| ENSG00000095637 | ACUGCAG |
| ENSG00000095637 | AGAUAAA |
| ENSG00000095637 | AUAAAGU |
| ENSG00000095637 | AUAUUAU |
| ENSG00000095637 | CUGACUC |
| ENSG00000095637 | CUGGAAA |
| ENSG00000095637 | CUUCUCU |
| ENSG00000095637 | GAGCUAA |
| ENSG00000095637 | GAGGCUG |
| ENSG00000095637 | UACAGUU |
| ENSG00000095637 | UCAACAG |
| ENSG00000095637 | UCAUUUG |
| ENSG00000095637 | UCCCUUG |
| ENSG00000095637 | UCCUGAG |
| ENSG00000095637 | UGGAGAU |
| ENSG00000095637 | UGGGACA |
| ENSG00000095637 | UGUAUAA |
| ENSG00000095637 | UGUGCUU |
| ENSG00000095637 | UUCAAAU |
| ENSG00000095739 | AAGUGCU |

|                 |          |
|-----------------|----------|
| ENSG00000095739 | AGAUAAA  |
| ENSG00000095739 | AUAAAAGU |
| ENSG00000095739 | CAGCAGA  |
| ENSG00000095739 | CCAGCAU  |
| ENSG00000095752 | AAAAACC  |
| ENSG00000095752 | AAAGUAA  |
| ENSG00000095752 | UCACAUU  |
| ENSG00000095787 | AAAGUGC  |
| ENSG00000095787 | AAUCACU  |
| ENSG00000095787 | AAUUAUU  |
| ENSG00000095787 | AGUGCCU  |
| ENSG00000095787 | AUACAAG  |
| ENSG00000095787 | AUGGCUU  |
| ENSG00000095787 | CAGACAG  |
| ENSG00000095787 | CCCCUGG  |
| ENSG00000095787 | CUCCAC   |
| ENSG00000095787 | GGUUUAC  |
| ENSG00000095787 | GUCUACU  |
| ENSG00000095787 | GUGCAA   |
| ENSG00000095787 | UACAAAG  |
| ENSG00000095787 | UAGGUAU  |
| ENSG00000095787 | UGCAGCU  |
| ENSG00000095794 | AUCCUUU  |
| ENSG00000095794 | CAAAGCA  |
| ENSG00000095794 | CUACAAA  |
| ENSG00000095794 | GAGGUAG  |
| ENSG00000095951 | AAGUGUG  |
| ENSG00000095951 | AAUUAUU  |
| ENSG00000095951 | AUACAAG  |
| ENSG00000095951 | AUUGCAC  |
| ENSG00000095951 | GUAAACA  |
| ENSG00000095951 | GUGCUUG  |
| ENSG00000096060 | AAAGCUG  |
| ENSG00000096060 | AACACUG  |
| ENSG00000096060 | ACCCGUA  |
| ENSG00000096060 | ACUCCAG  |
| ENSG00000096060 | AGCAGCA  |
| ENSG00000096060 | CACUGUU  |
| ENSG00000096060 | CAGCAGG  |
| ENSG00000096060 | CUGGACU  |
| ENSG00000096060 | GAGUUGA  |
| ENSG00000096060 | GAGUUGG  |
| ENSG00000096060 | GCUUCCU  |
| ENSG00000096060 | GGAGUGU  |
| ENSG00000096060 | UCCAGAG  |
| ENSG00000096060 | UCCUGAG  |
| ENSG00000096060 | UGAAAUG  |
| ENSG00000096063 | AGCAGCA  |
| ENSG00000096070 | AAGUCAC  |
| ENSG00000096070 | ACAAUUAU |
| ENSG00000096070 | ACAGUAU  |
| ENSG00000096070 | ACCUGGA  |
| ENSG00000096070 | ACUGUGU  |
| ENSG00000096070 | AGCAGCU  |
| ENSG00000096070 | AGUGAUC  |
| ENSG00000096070 | AUAAAAGU |
| ENSG00000096070 | AUAUUAU  |
| ENSG00000096070 | CACAAUG  |
| ENSG00000096070 | CAGCAGA  |
| ENSG00000096070 | CAGCAGG  |
| ENSG00000096070 | CUACAAA  |
| ENSG00000096070 | CUUUGGU  |
| ENSG00000096070 | GGUGGUU  |
| ENSG00000096070 | GUGCUUG  |

|                 |         |
|-----------------|---------|
| ENSG00000096070 | UCUAGAG |
| ENSG00000096070 | UGUAUAA |
| ENSG00000096070 | UGUGCUU |
| ENSG00000096070 | UUGGCAA |
| ENSG00000096092 | AAUACUG |
| ENSG00000096093 | AAGAACC |
| ENSG00000096093 | GAGCUGC |
| ENSG00000096264 | AAUUUUA |
| ENSG00000096384 | CUAUACA |
| ENSG00000096433 | ACAUUAC |
| ENSG00000096433 | AGUGCUU |
| ENSG00000096433 | GUAGUGU |
| ENSG00000096696 | AAAGUUU |
| ENSG00000096696 | UAUUGCU |
| ENSG00000096696 | UGCCAGC |
| ENSG00000096717 | AAAGAGC |
| ENSG00000096717 | AUGGCUU |
| ENSG00000096717 | CACAGUG |
| ENSG00000096717 | CCAGUGU |
| ENSG00000096717 | UAAUGCU |
| ENSG00000096717 | UCCCUUG |
| ENSG00000096717 | UGCAUUA |
| ENSG00000096717 | UUGGUCC |
| ENSG00000096746 | AAAAAUC |
| ENSG00000096746 | AAAAGUA |
| ENSG00000096746 | AAAGUUU |
| ENSG00000096746 | AACAUUC |
| ENSG00000096746 | AAGUCAC |
| ENSG00000096746 | CAAAGUG |
| ENSG00000096746 | CCUUCAU |
| ENSG00000096746 | CUAGUAA |
| ENSG00000096746 | CUCCCAA |
| ENSG00000096746 | CUGUUGA |
| ENSG00000096746 | UCACAUU |
| ENSG00000096746 | UCCACA  |
| ENSG00000096968 | UUCAAAU |
| ENSG00000097007 | AAAGAGG |
| ENSG00000097007 | AGGUAGU |
| ENSG00000097007 | UGAAAUG |
| ENSG00000097021 | CUUUGGU |
| ENSG00000097021 | UGGCCAC |
| ENSG00000097033 | AAUUAUU |
| ENSG00000097033 | ACUGCAG |
| ENSG00000097033 | AGCACCA |
| ENSG00000097033 | AUAUAAC |
| ENSG00000097033 | CACAAUG |
| ENSG00000097033 | CUUUGGU |
| ENSG00000097033 | GUAGUGU |
| ENSG00000097033 | UAGUGAG |
| ENSG00000097033 | UGUCUUU |
| ENSG00000097046 | GCACCAU |
| ENSG00000097096 | AAGUGCU |
| ENSG00000097096 | AGCAGCG |
| ENSG00000097096 | GUUAAUG |
| ENSG00000097096 | UGCAUUG |
| ENSG00000099194 | AAAAAUC |
| ENSG00000099194 | AAAACUG |
| ENSG00000099194 | AACAAAC |
| ENSG00000099194 | AAGGCAC |
| ENSG00000099194 | ACUGGAU |
| ENSG00000099194 | ACUGUAG |
| ENSG00000099194 | AGCAUUC |
| ENSG00000099194 | AGUAGUU |
| ENSG00000099194 | CAAAACU |



|                 |         |
|-----------------|---------|
| ENSG00000099194 | CAGUAGA |
| ENSG00000099194 | CCCACCG |
| ENSG00000099194 | CCCACCU |
| ENSG00000099194 | CCCUGG  |
| ENSG00000099194 | CCCUGAG |
| ENSG00000099194 | CUUACAG |
| ENSG00000099194 | GACCCUG |
| ENSG00000099194 | GAGCUAA |
| ENSG00000099194 | GAGGCAG |
| ENSG00000099194 | GAGGUAU |
| ENSG00000099194 | GGAAUGU |
| ENSG00000099194 | UCUCAAG |
| ENSG00000099194 | UGCCAGC |
| ENSG00000099194 | UUCAAAU |
| ENSG00000099203 | GACCAUG |
| ENSG00000099204 | AGCCCUU |
| ENSG00000099204 | GGCAAGA |
| ENSG00000099204 | GGCAGUG |
| ENSG00000099204 | UUGGCAA |
| ENSG00000099219 | AGUAACA |
| ENSG00000099219 | CAGUGCA |
| ENSG00000099219 | GCUUCCU |
| ENSG00000099219 | UCAAGUA |
| ENSG00000099219 | UUCAAGC |
| ENSG00000099246 | ACUGUGU |
| ENSG00000099246 | AUGUGCC |
| ENSG00000099250 | AAGGCAC |
| ENSG00000099250 | ACAUUCA |
| ENSG00000099250 | AGCCAGU |
| ENSG00000099250 | AGCCCUU |
| ENSG00000099250 | AGUAGUU |
| ENSG00000099250 | AGUGCAA |
| ENSG00000099250 | CCAGUGC |
| ENSG00000099250 | GAGAAAU |
| ENSG00000099250 | GUUCAUG |
| ENSG00000099250 | UAUUGCU |
| ENSG00000099250 | UCACAAG |
| ENSG00000099250 | UCCUGAG |
| ENSG00000099250 | UGAAGCU |
| ENSG00000099250 | UGAGAAU |
| ENSG00000099250 | UUGGAGG |
| ENSG00000099282 | AAAAAUC |
| ENSG00000099282 | AAGGCAC |
| ENSG00000099290 | GCAGAAG |
| ENSG00000099308 | AAAGUGC |
| ENSG00000099308 | CAAAGUG |
| ENSG00000099308 | GUAAACA |
| ENSG00000099308 | UACAAAG |
| ENSG00000099308 | UAUAAAG |
| ENSG00000099308 | UCACACA |
| ENSG00000099308 | UGGGACA |
| ENSG00000099331 | UACAAAG |
| ENSG00000099331 | UUGGUCC |
| ENSG00000099364 | AACACUG |
| ENSG00000099364 | AGCAAAA |
| ENSG00000099364 | AGCUGCC |
| ENSG00000099364 | AGUAACA |
| ENSG00000099364 | AUACAAG |
| ENSG00000099364 | AUGUGGG |
| ENSG00000099364 | CAGUCCA |
| ENSG00000099364 | CAGUGCA |
| ENSG00000099364 | CCAGGAG |
| ENSG00000099364 | CCAGUAC |
| ENSG00000099364 | CCCUGUU |

|                 |          |
|-----------------|----------|
| ENSG00000099364 | CUCCAC   |
| ENSG00000099364 | CUGGCA   |
| ENSG00000099364 | CUUUGGU  |
| ENSG00000099364 | GAGGUAG  |
| ENSG00000099364 | GAGUAU   |
| ENSG00000099364 | GGAAGAC  |
| ENSG00000099364 | GGAGGAG  |
| ENSG00000099364 | GGAGUCC  |
| ENSG00000099364 | GGCUCAG  |
| ENSG00000099364 | GGCUGCG  |
| ENSG00000099364 | UCCACC   |
| ENSG00000099364 | UCCUGU   |
| ENSG00000099364 | UCCAUU   |
| ENSG00000099364 | UUGGUCC  |
| ENSG00000099365 | AUGUGCC  |
| ENSG00000099365 | CCUGCUG  |
| ENSG00000099365 | GCCUGGA  |
| ENSG00000099365 | GGGGGAA  |
| ENSG00000099365 | UAUUGCU  |
| ENSG00000099377 | GGACCUG  |
| ENSG00000099381 | AAAAAUC  |
| ENSG00000099381 | AAUCACU  |
| ENSG00000099381 | ACAAUUAU |
| ENSG00000099381 | AUAAAGU  |
| ENSG00000099381 | UAUAAAG  |
| ENSG00000099622 | AAGAACC  |
| ENSG00000099622 | ACAAUUAU |
| ENSG00000099622 | CAGGCUC  |
| ENSG00000099622 | UCAGCGG  |
| ENSG00000099622 | UCUUGAG  |
| ENSG00000099625 | AGCCUGC  |
| ENSG00000099625 | CAGGCUC  |
| ENSG00000099625 | CUCUAGC  |
| ENSG00000099715 | CAAAGCA  |
| ENSG00000099715 | CCUGCUG  |
| ENSG00000099715 | CUGGGCA  |
| ENSG00000099715 | UUGGCAC  |
| ENSG00000099785 | AUAAAGU  |
| ENSG00000099785 | AUUCAUU  |
| ENSG00000099785 | UAUAAAG  |
| ENSG00000099800 | GGCUCAG  |
| ENSG00000099804 | AACAAAC  |
| ENSG00000099804 | AGGUAGU  |
| ENSG00000099804 | GAGUAU   |
| ENSG00000099814 | UCCUGAG  |
| ENSG00000099822 | ACAUUCA  |
| ENSG00000099822 | AUGGCUU  |
| ENSG00000099822 | GGGGUGG  |
| ENSG00000099860 | UCUCCAA  |
| ENSG00000099864 | AGCACCA  |
| ENSG00000099875 | AGCAAAA  |
| ENSG00000099875 | CCCUGAG  |
| ENSG00000099875 | GAGCCCU  |
| ENSG00000099875 | GAUUGUC  |
| ENSG00000099875 | UCCUGAG  |
| ENSG00000099875 | UGCAUAG  |
| ENSG00000099889 | AGCACCA  |
| ENSG00000099889 | CAGCAGG  |
| ENSG00000099889 | CUUACAG  |
| ENSG00000099889 | UACAAAG  |
| ENSG00000099901 | UCCCUUG  |
| ENSG00000099904 | AAAAACC  |
| ENSG00000099904 | CAAGAGC  |
| ENSG00000099904 | CAGCUGG  |

|                |         |
|----------------|---------|
| ENSG0000099904 | CUCCAC  |
| ENSG0000099904 | GGCAGGG |
| ENSG0000099904 | GGGGCAG |
| ENSG0000099904 | GUGCUUG |
| ENSG0000099904 | GUUAGGA |
| ENSG0000099904 | UCCAGUU |
| ENSG0000099904 | UCCACA  |
| ENSG0000099904 | UGAAAGG |
| ENSG0000099904 | UGUGCUU |
| ENSG0000099917 | AAAUUUC |
| ENSG0000099917 | AGAUAAA |
| ENSG0000099917 | AGUGCAA |
| ENSG0000099917 | CAGGCUC |
| ENSG0000099917 | CCCUGAG |
| ENSG0000099917 | GCAGAAG |
| ENSG0000099940 | AAGGCAC |
| ENSG0000099940 | UGCAAAG |
| ENSG0000099940 | UUUGCAA |
| ENSG0000099942 | AAAGCUG |
| ENSG0000099942 | AACUCUA |
| ENSG0000099942 | AAGUCAC |
| ENSG0000099942 | ACAGGUG |
| ENSG0000099942 | ACUGUUU |
| ENSG0000099942 | AGCAGCA |
| ENSG0000099942 | AUAUUAU |
| ENSG0000099942 | AUCCCUU |
| ENSG0000099942 | CAAGAGC |
| ENSG0000099942 | CACAGUG |
| ENSG0000099942 | CACUGUU |
| ENSG0000099942 | CAGCAGG |
| ENSG0000099942 | CAGUUAC |
| ENSG0000099942 | CUUCUCU |
| ENSG0000099942 | GAGAAGA |
| ENSG0000099942 | GCUACAU |
| ENSG0000099942 | GCUUCCU |
| ENSG0000099942 | GUAAACA |
| ENSG0000099942 | GUGCUUG |
| ENSG0000099942 | UAAUACA |
| ENSG0000099942 | UAUAAAG |
| ENSG0000099942 | UAUUGCU |
| ENSG0000099942 | UCCACA  |
| ENSG0000099942 | UCCACC  |
| ENSG0000099942 | UGAGAAG |
| ENSG0000099942 | UGUGCUU |
| ENSG0000099942 | UUGGCAA |
| ENSG0000099942 | UUGGCAC |
| ENSG0000099949 | UCCUGU  |
| ENSG0000099953 | AUGGCUU |
| ENSG0000099953 | CAGGUGA |
| ENSG0000099953 | GAGGUAG |
| ENSG0000099953 | GAGGUAU |
| ENSG0000099953 | GUAUGUU |
| ENSG0000099954 | AAAGUUU |
| ENSG0000099954 | ACAAUAU |
| ENSG0000099954 | ACAUUCA |
| ENSG0000099954 | AUACCUC |
| ENSG0000099954 | CUGCUCU |
| ENSG0000099954 | GAUUGUC |
| ENSG0000099956 | AUACAAG |
| ENSG0000099956 | CUAUACA |
| ENSG0000099956 | GGAAUGU |
| ENSG0000099957 | GGGGUGG |
| ENSG0000099968 | AAAGUAA |
| ENSG0000099968 | AAAGUAC |

|                |          |
|----------------|----------|
| ENSG0000099968 | ACAAGGU  |
| ENSG0000099968 | GCAGCAU  |
| ENSG0000099968 | UAUUGCU  |
| ENSG0000099985 | AAGUGCA  |
| ENSG0000099985 | ACAAUUAU |
| ENSG0000099985 | CGUGGCC  |
| ENSG0000099985 | GGAGGAG  |
| ENSG0000099985 | UAUAAAAG |
| ENSG0000099985 | UGUGUCA  |
| ENSG0000099994 | GGGUGUU  |
| ENSG0000099995 | AGGAGCU  |
| ENSG0000099995 | CAGGCUC  |
| ENSG0000099995 | GAGCCCU  |
| ENSG0000099995 | UCAUUCG  |
| ENSG0000099998 | CUCUGGG  |
| ENSG0000099998 | CUGGGCA  |
| ENSG0000010003 | AAUUUA   |
| ENSG0000010003 | GUAAACA  |
| ENSG0000010003 | UCCUGU   |
| ENSG0000010003 | UCCUAG   |
| ENSG0000010003 | UUGGCAC  |
| ENSG0000010012 | GUCUCUG  |
| ENSG0000010023 | AAAGCUG  |
| ENSG0000010027 | AAAGUGC  |
| ENSG0000010027 | CAAAGUG  |
| ENSG0000010027 | CCAGUGC  |
| ENSG0000010027 | CCAGUGU  |
| ENSG0000010027 | CUCACAC  |
| ENSG0000010027 | CUCUAGC  |
| ENSG0000010027 | GCAGAAG  |
| ENSG0000010027 | UCAAGUA  |
| ENSG0000010027 | UCACACA  |
| ENSG0000010027 | UUGGUUC  |
| ENSG0000010028 | CAAAGCA  |
| ENSG0000010028 | CUCAAAC  |
| ENSG0000010028 | UCUCAAG  |
| ENSG0000010030 | AAAGCUG  |
| ENSG0000010030 | AAAGUAC  |
| ENSG0000010030 | AAAUUUC  |
| ENSG0000010030 | AACGGCU  |
| ENSG0000010030 | AAGGCAC  |
| ENSG0000010030 | AAGUGCA  |
| ENSG0000010030 | AAUUAUU  |
| ENSG0000010030 | AAUUUUA  |
| ENSG0000010030 | ACAAUUAU |
| ENSG0000010030 | ACAGUAC  |
| ENSG0000010030 | ACUUGGA  |
| ENSG0000010030 | AGCAAAA  |
| ENSG0000010030 | AGCAUUC  |
| ENSG0000010030 | AGUGCAA  |
| ENSG0000010030 | AGUGCUG  |
| ENSG0000010030 | AGUGCUU  |
| ENSG0000010030 | AGUGGUU  |
| ENSG0000010030 | AUAUAAC  |
| ENSG0000010030 | CAAAACU  |
| ENSG0000010030 | CACAGGG  |
| ENSG0000010030 | CAGGUGA  |
| ENSG0000010030 | CUAUACA  |
| ENSG0000010030 | GAGAAAU  |
| ENSG0000010030 | GAGAUGA  |
| ENSG0000010030 | GAGCCCU  |
| ENSG0000010030 | GCUAGCA  |
| ENSG0000010030 | GGAAUGU  |
| ENSG0000010030 | GGAGGCA  |

|                 |         |
|-----------------|---------|
| ENSG00000100030 | GUCACUC |
| ENSG00000100030 | GUGCAAA |
| ENSG00000100030 | GUUCAUG |
| ENSG00000100030 | UAAUACA |
| ENSG00000100030 | UCACCAC |
| ENSG00000100030 | UCCCUUG |
| ENSG00000100030 | UCCCUUU |
| ENSG00000100030 | UGAAAGG |
| ENSG00000100030 | UGCUGAC |
| ENSG00000100030 | UGGACUG |
| ENSG00000100030 | UGGAUAA |
| ENSG00000100030 | UCCUAG  |
| ENSG00000100034 | AAGGCAC |
| ENSG00000100034 | ACUGCAG |
| ENSG00000100034 | ACUGCAU |
| ENSG00000100034 | CACCACC |
| ENSG00000100034 | CUGGAAA |
| ENSG00000100034 | CUGGCUC |
| ENSG00000100034 | GGCAGGG |
| ENSG00000100034 | GGUUUAC |
| ENSG00000100034 | UAUAUGA |
| ENSG00000100034 | UUGACAC |
| ENSG00000100034 | UUGGCAC |
| ENSG00000100036 | AGCAGCU |
| ENSG00000100036 | AGGCAGG |
| ENSG00000100036 | CCAGUGC |
| ENSG00000100036 | CCAGUGU |
| ENSG00000100036 | CCCCCAG |
| ENSG00000100036 | GCCUGGA |
| ENSG00000100036 | UGAGGAC |
| ENSG00000100036 | UUGAGGC |
| ENSG00000100036 | UUGGCAC |
| ENSG00000100056 | AAGGCAC |
| ENSG00000100056 | AAGUAGC |
| ENSG00000100056 | ACAGGUG |
| ENSG00000100056 | ACUCAGC |
| ENSG00000100056 | CAGGCUC |
| ENSG00000100060 | CCUUCAU |
| ENSG00000100060 | UGGCUGC |
| ENSG00000100065 | AGCAGCA |
| ENSG00000100065 | GGCUCAG |
| ENSG00000100065 | GUGCAAA |
| ENSG00000100065 | UGCAGCU |
| ENSG00000100068 | AGAUGUG |
| ENSG00000100068 | CAGUAGA |
| ENSG00000100068 | CCAGUAC |
| ENSG00000100068 | GCAGGUU |
| ENSG00000100068 | UGGCCAC |
| ENSG00000100075 | AAGGCAC |
| ENSG00000100075 | ACCCUGU |
| ENSG00000100075 | GAGGCAG |
| ENSG00000100075 | GGUGGUC |
| ENSG00000100075 | UCCUGAG |
| ENSG00000100077 | AAGUGCA |
| ENSG00000100077 | CAGCAGA |
| ENSG00000100077 | CAGUAGA |
| ENSG00000100077 | CCAGUGU |
| ENSG00000100077 | CUCCAUU |
| ENSG00000100077 | GAGGUAG |
| ENSG00000100077 | UAUAAAG |
| ENSG00000100077 | UGUGCUU |
| ENSG00000100078 | ACCCAUU |
| ENSG00000100078 | CAGCAGG |
| ENSG00000100084 | AAAAAUC |

|                 |         |
|-----------------|---------|
| ENSG00000100084 | AAUUAUU |
| ENSG00000100084 | AGCAAAA |
| ENSG00000100084 | CUAGUAA |
| ENSG00000100084 | CUAGUAG |
| ENSG00000100084 | GUUCAUG |
| ENSG00000100084 | UCAUUUG |
| ENSG00000100084 | UUCCUAG |
| ENSG00000100095 | CUCUGGG |
| ENSG00000100095 | GUCUCUG |
| ENSG00000100100 | AAAAGUA |
| ENSG00000100100 | AAGGCAC |
| ENSG00000100100 | AUAUAAC |
| ENSG00000100100 | GAGGUAG |
| ENSG00000100100 | GGAAGCC |
| ENSG00000100101 | GGAAGCC |
| ENSG00000100105 | AAAACUG |
| ENSG00000100105 | AAAGAGC |
| ENSG00000100105 | AAUCUCU |
| ENSG00000100105 | AAUUAUU |
| ENSG00000100105 | CAGUAGA |
| ENSG00000100105 | CAGUAGU |
| ENSG00000100105 | GUGACUG |
| ENSG00000100105 | UAUGGUU |
| ENSG00000100105 | UCACAGG |
| ENSG00000100105 | UCACAGU |
| ENSG00000100105 | UCCAUA  |
| ENSG00000100106 | AAGGUGC |
| ENSG00000100106 | AUAUAAC |
| ENSG00000100106 | CCUGCUG |
| ENSG00000100106 | CUUCACC |
| ENSG00000100106 | GAGGUAG |
| ENSG00000100106 | GUGUGGC |
| ENSG00000100106 | UAUAAAG |
| ENSG00000100106 | UCACAUU |
| ENSG00000100106 | UCCCUCU |
| ENSG00000100106 | UGUGUGG |
| ENSG00000100124 | AAGUGCU |
| ENSG00000100124 | AGUGCUG |
| ENSG00000100124 | CUGCCCC |
| ENSG00000100124 | GCUGGUG |
| ENSG00000100139 | AGUGCUU |
| ENSG00000100139 | CCCUGAG |
| ENSG00000100146 | AGAUAAA |
| ENSG00000100146 | GAAUUGU |
| ENSG00000100146 | GCUACAU |
| ENSG00000100146 | UAAUGCU |
| ENSG00000100147 | CUGCAGC |
| ENSG00000100147 | CUGCAGG |
| ENSG00000100147 | GAGCCCU |
| ENSG00000100147 | GUCUCUG |
| ENSG00000100151 | AGGCAGG |
| ENSG00000100151 | AGGGAGG |
| ENSG00000100151 | CAGCAGG |
| ENSG00000100151 | CUCCAC  |
| ENSG00000100151 | GAGGCAG |
| ENSG00000100151 | GGAGGCA |
| ENSG00000100151 | UUAUGCA |
| ENSG00000100167 | AAGUCAC |
| ENSG00000100167 | ACAUUCA |
| ENSG00000100167 | AGCCCUU |
| ENSG00000100167 | CUCACAC |
| ENSG00000100167 | GGCAGUG |
| ENSG00000100167 | UAUUGCU |
| ENSG00000100167 | UCCCUCU |

|                 |         |
|-----------------|---------|
| ENSG00000100167 | UGAAAUG |
| ENSG00000100201 | ACCAGCA |
| ENSG00000100201 | ACUGGAU |
| ENSG00000100201 | AUACCUC |
| ENSG00000100201 | GCCUGAU |
| ENSG00000100201 | GGAAUGU |
| ENSG00000100201 | UCAAGUA |
| ENSG00000100201 | UCCAGUU |
| ENSG00000100206 | AAAGUAA |
| ENSG00000100206 | UCACCAC |
| ENSG00000100207 | AAGUCUU |
| ENSG00000100207 | AAGUGCU |
| ENSG00000100207 | ACUGUUU |
| ENSG00000100207 | AGUGCUG |
| ENSG00000100207 | AUCCCUU |
| ENSG00000100207 | CACCACC |
| ENSG00000100207 | CCUUCUU |
| ENSG00000100207 | GAAAACA |
| ENSG00000100207 | GAAACAU |
| ENSG00000100207 | GAGAUGA |
| ENSG00000100207 | GUCACUC |
| ENSG00000100207 | GUGCUUG |
| ENSG00000100207 | UACAAAG |
| ENSG00000100207 | UCAUUUG |
| ENSG00000100207 | UCCCUUU |
| ENSG00000100207 | UGUGCUU |
| ENSG00000100207 | UGUGUCA |
| ENSG00000100207 | UUGUGAC |
| ENSG00000100216 | AUGUGCC |
| ENSG00000100216 | CAGCAGA |
| ENSG00000100216 | CAGCAGG |
| ENSG00000100216 | GUGCCAC |
| ENSG00000100216 | UAAUAUC |
| ENSG00000100219 | AAUUGCU |
| ENSG00000100221 | AAAUGGU |
| ENSG00000100221 | AACAAAC |
| ENSG00000100221 | AAGUGCU |
| ENSG00000100221 | ACUCCAG |
| ENSG00000100221 | AGCACCA |
| ENSG00000100221 | AGUGCUG |
| ENSG00000100221 | AUGGCUU |
| ENSG00000100221 | CCCUGUC |
| ENSG00000100221 | CUUGGGC |
| ENSG00000100221 | GAGGCAG |
| ENSG00000100221 | GCAGCAU |
| ENSG00000100221 | GCCCUUA |
| ENSG00000100221 | GGAAUGU |
| ENSG00000100221 | GGAGGCA |
| ENSG00000100221 | GUCAUUG |
| ENSG00000100221 | UAAUAUC |
| ENSG00000100221 | UCCUGU  |
| ENSG00000100221 | UGAAAUG |
| ENSG00000100221 | UGCAUAG |
| ENSG00000100221 | UGCAUAU |
| ENSG00000100221 | UUGGUUC |
| ENSG00000100226 | AAAAACC |
| ENSG00000100226 | AACAAAC |
| ENSG00000100226 | ACUUGGA |
| ENSG00000100226 | AGCAGCA |
| ENSG00000100226 | AGCUUAU |
| ENSG00000100226 | AUAAUAC |
| ENSG00000100226 | CAGUCCA |
| ENSG00000100226 | CUACAAA |
| ENSG00000100226 | CUGGAAA |

|                 |          |
|-----------------|----------|
| ENSG00000100226 | CUGGGCA  |
| ENSG00000100226 | CUUUGGU  |
| ENSG00000100226 | GAUUGUC  |
| ENSG00000100226 | GGCAGGG  |
| ENSG00000100226 | GGCUCAG  |
| ENSG00000100226 | GGGUGGU  |
| ENSG00000100226 | UAUAAAAG |
| ENSG00000100226 | UAUAAUA  |
| ENSG00000100226 | UUGGCAA  |
| ENSG00000100226 | UUGGCAC  |
| ENSG00000100227 | AACAAAC  |
| ENSG00000100227 | CUGCCCC  |
| ENSG00000100227 | GGAAUGU  |
| ENSG00000100228 | UUGGCAA  |
| ENSG00000100234 | AAACUGU  |
| ENSG00000100234 | AAAUUUC  |
| ENSG00000100234 | ACAAUUA  |
| ENSG00000100234 | ACACACU  |
| ENSG00000100234 | ACAGUAC  |
| ENSG00000100234 | ACAGUAU  |
| ENSG00000100234 | ACAUUAC  |
| ENSG00000100234 | CAGCAGA  |
| ENSG00000100234 | GAAAACA  |
| ENSG00000100234 | GAGCUAA  |
| ENSG00000100234 | GCCUGGG  |
| ENSG00000100234 | GCUACAU  |
| ENSG00000100234 | GGCAGCG  |
| ENSG00000100234 | UUAUGCA  |
| ENSG00000100234 | UUUGCAA  |
| ENSG00000100239 | AAAGUGC  |
| ENSG00000100239 | AAGGCAC  |
| ENSG00000100239 | AAGUGCA  |
| ENSG00000100239 | AGGUAGU  |
| ENSG00000100239 | AGUGCAA  |
| ENSG00000100239 | CAAAGUG  |
| ENSG00000100239 | CACCAGC  |
| ENSG00000100239 | GUGCAAA  |
| ENSG00000100239 | UAUUGCU  |
| ENSG00000100241 | AAUACUG  |
| ENSG00000100241 | GUAAACA  |
| ENSG00000100243 | AAAGUUU  |
| ENSG00000100243 | AGGCAGG  |
| ENSG00000100246 | AUAUAAC  |
| ENSG00000100246 | CCCUGAG  |
| ENSG00000100246 | GCCUGGG  |
| ENSG00000100258 | AAGGCAC  |
| ENSG00000100280 | GGGGUGG  |
| ENSG00000100284 | AAGGCAC  |
| ENSG00000100284 | CUCCCAA  |
| ENSG00000100284 | CUCCCAC  |
| ENSG00000100284 | GGCAGUG  |
| ENSG00000100292 | CUGCAGG  |
| ENSG00000100296 | CAGGUGA  |
| ENSG00000100296 | CCCACCU  |
| ENSG00000100296 | UGUCUUU  |
| ENSG00000100302 | AACAAAC  |
| ENSG00000100302 | AAGGCAC  |
| ENSG00000100302 | ACAGUAU  |
| ENSG00000100302 | CUGGCUC  |
| ENSG00000100302 | GCAGAAG  |
| ENSG00000100302 | UACAGUU  |
| ENSG00000100304 | AGCAGCU  |
| ENSG00000100304 | GCAGAAG  |
| ENSG00000100304 | GCUGGUG  |



|                 |         |
|-----------------|---------|
| ENSG00000100307 | AAACGGU |
| ENSG00000100307 | AAGUCAC |
| ENSG00000100307 | AAUUUUA |
| ENSG00000100307 | AGAUAAA |
| ENSG00000100307 | AGCAAAA |
| ENSG00000100307 | AGUACUG |
| ENSG00000100307 | AUUCAUU |
| ENSG00000100307 | CCCUGAG |
| ENSG00000100307 | CUAUACA |
| ENSG00000100307 | CUUGUGU |
| ENSG00000100307 | CUUUGGU |
| ENSG00000100307 | GACAACU |
| ENSG00000100307 | GACCUGG |
| ENSG00000100307 | GACUUCC |
| ENSG00000100307 | GAGACCU |
| ENSG00000100307 | GCUGUCU |
| ENSG00000100307 | GGAAGCC |
| ENSG00000100307 | GGGAACG |
| ENSG00000100307 | GUGCAAA |
| ENSG00000100307 | UCAUUUG |
| ENSG00000100307 | UCUGGAA |
| ENSG00000100307 | UGCAAAG |
| ENSG00000100307 | UGUCUUU |
| ENSG00000100307 | UGUGCUU |
| ENSG00000100307 | UUGGCAA |
| ENSG00000100307 | UUGGUUC |
| ENSG00000100311 | AAUCACU |
| ENSG00000100311 | ACAAUAU |
| ENSG00000100311 | AGCACCA |
| ENSG00000100311 | AUCACUA |
| ENSG00000100311 | CACUCCU |
| ENSG00000100311 | CAGUCUG |
| ENSG00000100311 | GAGGUAG |
| ENSG00000100311 | GCACCAU |
| ENSG00000100311 | UACAAAG |
| ENSG00000100314 | AUAAAGU |
| ENSG00000100314 | CUGCAGG |
| ENSG00000100314 | GUGGCCC |
| ENSG00000100314 | GUGUGGC |
| ENSG00000100314 | UGAAAUG |
| ENSG00000100319 | UAUAAAG |
| ENSG00000100320 | AAACUGU |
| ENSG00000100320 | AACAAAC |
| ENSG00000100320 | ACUGUAG |
| ENSG00000100320 | AGCAGCU |
| ENSG00000100320 | AGCCAGU |
| ENSG00000100320 | AGCUGCC |
| ENSG00000100320 | AGGACAC |
| ENSG00000100320 | AGUGCAA |
| ENSG00000100320 | AUGGCUU |
| ENSG00000100320 | AUUGCAC |
| ENSG00000100320 | CAAGAGC |
| ENSG00000100320 | CACAAUG |
| ENSG00000100320 | CAGUGCA |
| ENSG00000100320 | CUACAAA |
| ENSG00000100320 | CUAUACA |
| ENSG00000100320 | CUCUGGG |
| ENSG00000100320 | CUGGGCA |
| ENSG00000100320 | CUUCUCU |
| ENSG00000100320 | GACCCUG |
| ENSG00000100320 | GAGGUAG |
| ENSG00000100320 | GCAUCC  |
| ENSG00000100320 | GGCCUG  |
| ENSG00000100320 | GGUGGUC |

|                 |          |
|-----------------|----------|
| ENSG00000100320 | GUCUCUG  |
| ENSG00000100320 | GUCUGCC  |
| ENSG00000100320 | UACAGUU  |
| ENSG00000100320 | UAGUGAG  |
| ENSG00000100320 | UAUAAAAG |
| ENSG00000100320 | UCCUAUA  |
| ENSG00000100320 | UGGGUGA  |
| ENSG00000100320 | UGUCUGC  |
| ENSG00000100320 | UUAGAGA  |
| ENSG00000100320 | UUAUGCA  |
| ENSG00000100320 | UUCCUCG  |
| ENSG00000100320 | UUGUGUC  |
| ENSG00000100321 | AAGUCAC  |
| ENSG00000100321 | ACUGGAU  |
| ENSG00000100321 | CACCAGC  |
| ENSG00000100321 | CCUGCUG  |
| ENSG00000100321 | CCUUCUG  |
| ENSG00000100321 | CUAUACA  |
| ENSG00000100321 | CUUCACC  |
| ENSG00000100321 | GGUGGGC  |
| ENSG00000100321 | UAUUACC  |
| ENSG00000100321 | UCUCCAA  |
| ENSG00000100321 | UGAGUCU  |
| ENSG00000100321 | UGUGCUU  |
| ENSG00000100325 | AAGGCGC  |
| ENSG00000100325 | ACUGUGU  |
| ENSG00000100325 | CUCAGGG  |
| ENSG00000100330 | AAAGAAU  |
| ENSG00000100330 | AAAGUAA  |
| ENSG00000100330 | AAAGUAC  |
| ENSG00000100330 | AAAGUAU  |
| ENSG00000100330 | AAGACAU  |
| ENSG00000100330 | AAGUGCA  |
| ENSG00000100330 | AAGUGCU  |
| ENSG00000100330 | ACAGGUG  |
| ENSG00000100330 | ACAUCAC  |
| ENSG00000100330 | ACCCGUA  |
| ENSG00000100330 | ACCCUGU  |
| ENSG00000100330 | AGGAGCU  |
| ENSG00000100330 | AGGUAGU  |
| ENSG00000100330 | AGUGCUU  |
| ENSG00000100330 | CAAAGCA  |
| ENSG00000100330 | CAAAGUG  |
| ENSG00000100330 | CAUGGAU  |
| ENSG00000100330 | CCAGUGC  |
| ENSG00000100330 | CCAGUGU  |
| ENSG00000100330 | CCCUGAG  |
| ENSG00000100330 | CCCUGUC  |
| ENSG00000100330 | CCCUGUU  |
| ENSG00000100330 | CUACAAA  |
| ENSG00000100330 | CUGACUC  |
| ENSG00000100330 | CUGCCCC  |
| ENSG00000100330 | GAGCUGC  |
| ENSG00000100330 | GAGGUAG  |
| ENSG00000100330 | GAGUCUU  |
| ENSG00000100330 | GAUUGGU  |
| ENSG00000100330 | GCCUGGA  |
| ENSG00000100330 | GGAUUUC  |
| ENSG00000100330 | GGAUUUU  |
| ENSG00000100330 | GGCUCAG  |
| ENSG00000100330 | GGUGGUU  |
| ENSG00000100330 | GUCUGCC  |
| ENSG00000100330 | GUGGCCC  |
| ENSG00000100330 | UAAGACG  |

|                 |         |
|-----------------|---------|
| ENSG00000100330 | UAAGACU |
| ENSG00000100330 | UACAAAG |
| ENSG00000100330 | UAUAUGA |
| ENSG00000100330 | UCACACA |
| ENSG00000100330 | UCCUGU  |
| ENSG00000100330 | UCCUGAG |
| ENSG00000100330 | UCCUUGC |
| ENSG00000100330 | UGAGUCU |
| ENSG00000100330 | UUAGGAU |
| ENSG00000100330 | UUGACAC |
| ENSG00000100330 | UUGGCAC |
| ENSG00000100330 | UUGGUUC |
| ENSG00000100330 | UUUUUGC |
| ENSG00000100335 | AACAAAC |
| ENSG00000100335 | AAGUUGU |
| ENSG00000100335 | ACCCUGU |
| ENSG00000100335 | AGGUAGU |
| ENSG00000100335 | AUUCAUU |
| ENSG00000100335 | CACAGUG |
| ENSG00000100335 | CACCAGC |
| ENSG00000100335 | CUCUUCC |
| ENSG00000100335 | CUUCACC |
| ENSG00000100335 | GAAACAU |
| ENSG00000100335 | GAGGCAG |
| ENSG00000100335 | GAGGUAG |
| ENSG00000100335 | GGAGAGA |
| ENSG00000100335 | GUGAGGU |
| ENSG00000100335 | UCAUUCG |
| ENSG00000100335 | UUCUAAU |
| ENSG00000100345 | AUAUAAC |
| ENSG00000100345 | AUUGCAC |
| ENSG00000100345 | CCAGUGU |
| ENSG00000100345 | GGACCUG |
| ENSG00000100345 | GGCAGUG |
| ENSG00000100345 | GUAGUGU |
| ENSG00000100345 | GUGAGGU |
| ENSG00000100345 | UUGGUCC |
| ENSG00000100346 | AAACUGU |
| ENSG00000100346 | AGCCCUU |
| ENSG00000100346 | CAGCAA  |
| ENSG00000100346 | CAGCAGG |
| ENSG00000100346 | CUGGAAA |
| ENSG00000100346 | CUGGCUC |
| ENSG00000100346 | GAGGUAG |
| ENSG00000100346 | GAGGUAU |
| ENSG00000100346 | GCCCUUA |
| ENSG00000100346 | GCUGUCU |
| ENSG00000100346 | GGCCUG  |
| ENSG00000100346 | GGCUCUG |
| ENSG00000100346 | GUGCUUG |
| ENSG00000100346 | UAUUGCU |
| ENSG00000100346 | UCCUGAG |
| ENSG00000100348 | AGCAGCA |
| ENSG00000100348 | CUACAAA |
| ENSG00000100348 | CUGCUC  |
| ENSG00000100350 | CUUUGGU |
| ENSG00000100350 | UUGGCAC |
| ENSG00000100354 | AAAGCUG |
| ENSG00000100354 | AAAUUUC |
| ENSG00000100354 | AAGAACC |
| ENSG00000100354 | AAGUCUU |
| ENSG00000100354 | AAGUGCA |
| ENSG00000100354 | AAGUGCU |
| ENSG00000100354 | AAUCCUU |

|                 |          |
|-----------------|----------|
| ENSG00000100354 | AAUGCCC  |
| ENSG00000100354 | ACAGUAAU |
| ENSG00000100354 | ACAUAGA  |
| ENSG00000100354 | ACAUCAC  |
| ENSG00000100354 | ACAUUCA  |
| ENSG00000100354 | ACCCGGC  |
| ENSG00000100354 | ACCCUGU  |
| ENSG00000100354 | ACUGGCU  |
| ENSG00000100354 | ACUGUGU  |
| ENSG00000100354 | AGCAAAA  |
| ENSG00000100354 | AGCACCA  |
| ENSG00000100354 | AGCAGCG  |
| ENSG00000100354 | AGCAGCU  |
| ENSG00000100354 | AGCCCUU  |
| ENSG00000100354 | AGCCUGC  |
| ENSG00000100354 | AGCUGCC  |
| ENSG00000100354 | AGGACAC  |
| ENSG00000100354 | AGUACUG  |
| ENSG00000100354 | AGUGCCU  |
| ENSG00000100354 | AUAUAAAC |
| ENSG00000100354 | AUGAUGA  |
| ENSG00000100354 | AUGAUGC  |
| ENSG00000100354 | AUGGCAC  |
| ENSG00000100354 | AUGGCUU  |
| ENSG00000100354 | AUGUCUG  |
| ENSG00000100354 | AUUGCAC  |
| ENSG00000100354 | CAAAGCA  |
| ENSG00000100354 | CAAGAGC  |
| ENSG00000100354 | CACAAUG  |
| ENSG00000100354 | CACCACC  |
| ENSG00000100354 | CAGCAA   |
| ENSG00000100354 | CAGCAGA  |
| ENSG00000100354 | CAGUCUG  |
| ENSG00000100354 | CAGUUAC  |
| ENSG00000100354 | CAUAUUG  |
| ENSG00000100354 | CCAGGAG  |
| ENSG00000100354 | CCCUGUU  |
| ENSG00000100354 | CCUUCAU  |
| ENSG00000100354 | CUCCAC   |
| ENSG00000100354 | CUCUAGC  |
| ENSG00000100354 | CUGGGCA  |
| ENSG00000100354 | CUUGUAAU |
| ENSG00000100354 | CUUUGGU  |
| ENSG00000100354 | GAAGGAA  |
| ENSG00000100354 | GAGAAGA  |
| ENSG00000100354 | GAGCUAA  |
| ENSG00000100354 | GAGGCAG  |
| ENSG00000100354 | GAGGCUG  |
| ENSG00000100354 | GAGGGGC  |
| ENSG00000100354 | GAGGUAAU |
| ENSG00000100354 | GAGUUGA  |
| ENSG00000100354 | GAGUUGG  |
| ENSG00000100354 | GCACCAU  |
| ENSG00000100354 | GCAGCAU  |
| ENSG00000100354 | GCAGGUU  |
| ENSG00000100354 | GCCUGGA  |
| ENSG00000100354 | GCUACAU  |
| ENSG00000100354 | GCUAGCA  |
| ENSG00000100354 | GCUGGUG  |
| ENSG00000100354 | GCUUCCU  |
| ENSG00000100354 | GGAAGAC  |
| ENSG00000100354 | GGACGGA  |
| ENSG00000100354 | GGAUUUU  |
| ENSG00000100354 | GGCAGUG  |

|                 |         |
|-----------------|---------|
| ENSG00000100354 | GGCAUUG |
| ENSG00000100354 | GGUAGAC |
| ENSG00000100354 | GGUUUAC |
| ENSG00000100354 | GUCAGUU |
| ENSG00000100354 | GUCCAGA |
| ENSG00000100354 | GUCUCUG |
| ENSG00000100354 | GUCUUGC |
| ENSG00000100354 | GUGACUG |
| ENSG00000100354 | GUGCCAC |
| ENSG00000100354 | UAUUGCU |
| ENSG00000100354 | UCACAAG |
| ENSG00000100354 | UCCCUUG |
| ENSG00000100354 | UGAAAGG |
| ENSG00000100354 | UGAAGUG |
| ENSG00000100354 | UGAGAAU |
| ENSG00000100354 | UGCAUAG |
| ENSG00000100354 | UGCAUUA |
| ENSG00000100354 | UGGAGAU |
| ENSG00000100354 | UGUAUGU |
| ENSG00000100354 | UUCAAGC |
| ENSG00000100354 | UUGGAGG |
| ENSG00000100354 | UUGGUCC |
| ENSG00000100354 | UUGGUUC |
| ENSG00000100354 | UUGUUCG |
| ENSG00000100359 | UCCUGAG |
| ENSG00000100362 | UCCAGAG |
| ENSG00000100364 | ACAGGUG |
| ENSG00000100364 | CUUUGGU |
| ENSG00000100364 | GAGGCAG |
| ENSG00000100364 | GAGGUAG |
| ENSG00000100364 | GAGGUUA |
| ENSG00000100364 | GCUGGUG |
| ENSG00000100364 | GGAAGCC |
| ENSG00000100364 | GGCAGCG |
| ENSG00000100364 | GGUGGGC |
| ENSG00000100364 | GUGAGGU |
| ENSG00000100364 | UCUGGAA |
| ENSG00000100364 | UCUGGAG |
| ENSG00000100364 | UGAAAUG |
| ENSG00000100364 | UGGCUGC |
| ENSG00000100372 | UGCUGAC |
| ENSG00000100376 | ACUGUUU |
| ENSG00000100376 | CCCUGAG |
| ENSG00000100376 | CUUUGGU |
| ENSG00000100376 | GAGGUAG |
| ENSG00000100376 | GAGGUUA |
| ENSG00000100376 | GGUUACC |
| ENSG00000100376 | UCAAGUA |
| ENSG00000100376 | UUCAAGC |
| ENSG00000100376 | UUGGCAA |
| ENSG00000100376 | UUGGCAC |
| ENSG00000100376 | UUUCAAC |
| ENSG00000100379 | ACCCUGU |
| ENSG00000100379 | AGGCAGG |
| ENSG00000100379 | GAGGCAG |
| ENSG00000100379 | GAGGUAG |
| ENSG00000100379 | GAGGUUA |
| ENSG00000100379 | GUGAGGU |
| ENSG00000100379 | UAUUACC |
| ENSG00000100380 | ACUGCAG |
| ENSG00000100380 | GAAAACA |
| ENSG00000100380 | GAAGGUC |
| ENSG00000100380 | GGUGGUC |
| ENSG00000100380 | UAUUGCU |

|                 |          |
|-----------------|----------|
| ENSG00000100380 | UGAGAAG  |
| ENSG00000100385 | GCCUGU   |
| ENSG00000100393 | AAAGAAU  |
| ENSG00000100393 | AAUACUG  |
| ENSG00000100393 | ACAAGGU  |
| ENSG00000100393 | ACAAUUAU |
| ENSG00000100393 | AGCUGCC  |
| ENSG00000100393 | AGUGAUC  |
| ENSG00000100393 | CUGCCCC  |
| ENSG00000100393 | UCACACA  |
| ENSG00000100401 | AGCAGCU  |
| ENSG00000100401 | CUCCAGC  |
| ENSG00000100403 | AAGUGCA  |
| ENSG00000100403 | AAGUGUG  |
| ENSG00000100403 | ACACACC  |
| ENSG00000100403 | ACACACU  |
| ENSG00000100403 | ACAUUAC  |
| ENSG00000100403 | ACCACAG  |
| ENSG00000100403 | ACUAGAU  |
| ENSG00000100403 | AUAAUAC  |
| ENSG00000100403 | AUAUAAC  |
| ENSG00000100403 | AUAUUUAU |
| ENSG00000100403 | AUGCAUU  |
| ENSG00000100403 | CAAAGUG  |
| ENSG00000100403 | CAGACAG  |
| ENSG00000100403 | CAGCUGG  |
| ENSG00000100403 | CAGGCUC  |
| ENSG00000100403 | CCCACCU  |
| ENSG00000100403 | CUCUUC   |
| ENSG00000100403 | CUGCAGC  |
| ENSG00000100403 | CUGGAAA  |
| ENSG00000100403 | GAGAAAU  |
| ENSG00000100403 | GCAGCAU  |
| ENSG00000100403 | GCAUCCC  |
| ENSG00000100403 | GCCUGAU  |
| ENSG00000100403 | GCUGGUG  |
| ENSG00000100403 | GGAAUGU  |
| ENSG00000100403 | GGCCUG   |
| ENSG00000100403 | GGCGACA  |
| ENSG00000100403 | GGGCCCC  |
| ENSG00000100403 | GGGUCC   |
| ENSG00000100403 | GUAUUCU  |
| ENSG00000100403 | GUGGGGA  |
| ENSG00000100403 | UAAUAUC  |
| ENSG00000100403 | UAUAAUA  |
| ENSG00000100403 | UCAAGUA  |
| ENSG00000100403 | UCUAGAG  |
| ENSG00000100403 | UCUGGAA  |
| ENSG00000100403 | UCUGGAG  |
| ENSG00000100403 | UGAAGCU  |
| ENSG00000100410 | CUGCAGC  |
| ENSG00000100410 | GCAGCAU  |
| ENSG00000100410 | GGCAGCG  |
| ENSG00000100412 | AAUCCUU  |
| ENSG00000100412 | UGAAAUG  |
| ENSG00000100413 | GAAGGAA  |
| ENSG00000100417 | AGCAGCA  |
| ENSG00000100422 | CUGCCCC  |
| ENSG00000100422 | CUUCUCU  |
| ENSG00000100422 | UCUCAAG  |
| ENSG00000100422 | UUUGCAC  |
| ENSG00000100425 | AAAGUUU  |
| ENSG00000100425 | UAAUGCU  |
| ENSG00000100425 | UAUUGCU  |

|                 |         |
|-----------------|---------|
| ENSG00000100425 | UGUAUAA |
| ENSG00000100426 | AAGGCAC |
| ENSG00000100426 | AGGAGCU |
| ENSG00000100426 | AUGGCUU |
| ENSG00000100426 | CAGUGCA |
| ENSG00000100426 | CCCUGUC |
| ENSG00000100426 | GACAACU |
| ENSG00000100426 | GUAAACA |
| ENSG00000100426 | UAUAAAG |
| ENSG00000100426 | UCACCAC |
| ENSG00000100426 | UCCAGAG |
| ENSG00000100426 | UGCAAAG |
| ENSG00000100426 | UUCUAAU |
| ENSG00000100433 | CACAGUG |
| ENSG00000100439 | AAGGCAC |
| ENSG00000100439 | AGCACCA |
| ENSG00000100439 | AGGCAGG |
| ENSG00000100439 | AGGGAGG |
| ENSG00000100439 | CAAAGCA |
| ENSG00000100439 | CAGACAG |
| ENSG00000100439 | CAGCUGG |
| ENSG00000100439 | CAGUAGU |
| ENSG00000100439 | CUGGCUC |
| ENSG00000100439 | GAAGGAA |
| ENSG00000100439 | UAAUAUC |
| ENSG00000100439 | UACAAAG |
| ENSG00000100442 | GUAAACA |
| ENSG00000100461 | AAAGUUU |
| ENSG00000100461 | AUCCCUU |
| ENSG00000100461 | AUGGCUU |
| ENSG00000100461 | CAGACAG |
| ENSG00000100461 | CAGCAGA |
| ENSG00000100461 | CCAGUGC |
| ENSG00000100461 | CCAGUGU |
| ENSG00000100461 | GAGGCAG |
| ENSG00000100461 | GGAGGCA |
| ENSG00000100461 | UUGGUCC |
| ENSG00000100478 | AAGGCAC |
| ENSG00000100478 | CUUCUCU |
| ENSG00000100483 | AGGCAGG |
| ENSG00000100483 | GGGUAAG |
| ENSG00000100485 | AAACUGU |
| ENSG00000100485 | AAGAACC |
| ENSG00000100485 | CAAAGCA |
| ENSG00000100485 | CCAGUGC |
| ENSG00000100485 | UAAGACG |
| ENSG00000100503 | GAGGUAU |
| ENSG00000100503 | UCCUGU  |
| ENSG00000100503 | UGCCUG  |
| ENSG00000100505 | AAAAACC |
| ENSG00000100505 | AAAGAAU |
| ENSG00000100505 | ACCAU   |
| ENSG00000100505 | AGCACCA |
| ENSG00000100505 | CAGCUGG |
| ENSG00000100505 | GUAAACA |
| ENSG00000100505 | UCCUGAG |
| ENSG00000100505 | UGCUGAC |
| ENSG00000100522 | AACUCUA |
| ENSG00000100522 | CACCAGC |
| ENSG00000100522 | CUUUGGU |
| ENSG00000100522 | GCAGCAU |
| ENSG00000100522 | GGAAUGU |
| ENSG00000100522 | GUCAUUG |
| ENSG00000100522 | UUGGUUC |

|                 |          |
|-----------------|----------|
| ENSG00000100523 | UACAAAG  |
| ENSG00000100528 | AGUGCAA  |
| ENSG00000100557 | AAGAACC  |
| ENSG00000100592 | ACUGUUU  |
| ENSG00000100592 | CACUGUU  |
| ENSG00000100592 | GGAAUGU  |
| ENSG00000100592 | GGCAGUG  |
| ENSG00000100592 | GUGCAAA  |
| ENSG00000100592 | GUGCUUG  |
| ENSG00000100596 | AAAGAAU  |
| ENSG00000100596 | AAAGCUG  |
| ENSG00000100596 | AAGGCAC  |
| ENSG00000100596 | AAGUGUG  |
| ENSG00000100596 | AGCACCA  |
| ENSG00000100596 | AGCCAGU  |
| ENSG00000100596 | CACACCU  |
| ENSG00000100596 | CUGGCUC  |
| ENSG00000100596 | GGCUCAG  |
| ENSG00000100596 | GUGACUG  |
| ENSG00000100596 | UACAAAG  |
| ENSG00000100596 | UAUAAAAG |
| ENSG00000100596 | UUGGUCC  |
| ENSG00000100596 | UUGUGAC  |
| ENSG00000100599 | UCCCUUU  |
| ENSG00000100601 | CAUGGAU  |
| ENSG00000100601 | GAAAACA  |
| ENSG00000100601 | GAGGUAG  |
| ENSG00000100601 | GGCAAGA  |
| ENSG00000100604 | AAAGCUG  |
| ENSG00000100604 | AUUGCAC  |
| ENSG00000100604 | UAUUGCU  |
| ENSG00000100604 | UCUAGAG  |
| ENSG00000100605 | AGUGCAA  |
| ENSG00000100605 | CAAAGCA  |
| ENSG00000100605 | CAGUAGA  |
| ENSG00000100605 | CAGUGCA  |
| ENSG00000100605 | CUCUGGG  |
| ENSG00000100605 | GAGCUGC  |
| ENSG00000100605 | GUAAACA  |
| ENSG00000100605 | UGACAUC  |
| ENSG00000100605 | UGGAGAU  |
| ENSG00000100605 | UUGGAGG  |
| ENSG00000100625 | AACAGUC  |
| ENSG00000100625 | AAUGCCC  |
| ENSG00000100625 | ACAGUAU  |
| ENSG00000100625 | ACAUUCA  |
| ENSG00000100625 | AGCAGCA  |
| ENSG00000100625 | AGUGCAA  |
| ENSG00000100625 | AGUGUGC  |
| ENSG00000100625 | AUGGCUU  |
| ENSG00000100625 | CAUAUUG  |
| ENSG00000100625 | CUACAAA  |
| ENSG00000100625 | GGGUAAG  |
| ENSG00000100625 | GUCCAGA  |
| ENSG00000100625 | UACAGUU  |
| ENSG00000100625 | UGCAUAG  |
| ENSG00000100625 | UGGGUAC  |
| ENSG00000100625 | UUCAAGC  |
| ENSG00000100625 | UCCUAG   |
| ENSG00000100625 | UUGGUUC  |
| ENSG00000100625 | UUUGCAA  |
| ENSG00000100626 | ACAUUCA  |
| ENSG00000100626 | AGCAAAA  |
| ENSG00000100626 | AGGGAGG  |



|                 |          |
|-----------------|----------|
| ENSG00000100626 | AGUGGUU  |
| ENSG00000100626 | CUUUGGU  |
| ENSG00000100626 | UCCAGAG  |
| ENSG00000100626 | UUGGUCC  |
| ENSG00000100629 | AUAAAGU  |
| ENSG00000100644 | AAAGUGC  |
| ENSG00000100644 | AAGUGCA  |
| ENSG00000100644 | ACAAUUAU |
| ENSG00000100644 | CCAGUGU  |
| ENSG00000100644 | GCUGGUG  |
| ENSG00000100644 | GUUAAUG  |
| ENSG00000100644 | UAAUAGU  |
| ENSG00000100644 | UAGACUG  |
| ENSG00000100647 | AAAGCUG  |
| ENSG00000100647 | AAAGUGC  |
| ENSG00000100647 | AAGGCAC  |
| ENSG00000100647 | ACAGGUG  |
| ENSG00000100647 | ACAUUCA  |
| ENSG00000100647 | ACCCUGU  |
| ENSG00000100647 | AGUGGUU  |
| ENSG00000100647 | AUAUAAC  |
| ENSG00000100647 | CACACCG  |
| ENSG00000100647 | CAGUUAC  |
| ENSG00000100647 | CCCUGAG  |
| ENSG00000100647 | CUCCAGC  |
| ENSG00000100647 | CUGCAGC  |
| ENSG00000100647 | CUUCACC  |
| ENSG00000100647 | CUUUGGU  |
| ENSG00000100647 | GAGCUGC  |
| ENSG00000100647 | GCCCUUA  |
| ENSG00000100647 | GUAAACA  |
| ENSG00000100647 | UCACACA  |
| ENSG00000100647 | UCACAGU  |
| ENSG00000100647 | UCACCAC  |
| ENSG00000100647 | UGAAAUG  |
| ENSG00000100647 | UGACAUC  |
| ENSG00000100647 | UGCAUAG  |
| ENSG00000100647 | UGCAUAU  |
| ENSG00000100647 | UUCUGCA  |
| ENSG00000100664 | AAAGAAU  |
| ENSG00000100664 | AAGUCUU  |
| ENSG00000100664 | AAGUGCU  |
| ENSG00000100664 | AAUUUUA  |
| ENSG00000100664 | AGAUGUG  |
| ENSG00000100664 | CAAAGUG  |
| ENSG00000100664 | CACAGUG  |
| ENSG00000100664 | CCUGCUG  |
| ENSG00000100664 | CUUUGGU  |
| ENSG00000100664 | GCAACUU  |
| ENSG00000100664 | GUGAAUG  |
| ENSG00000100664 | UAAGACG  |
| ENSG00000100664 | UAAGACU  |
| ENSG00000100664 | UAAUAUC  |
| ENSG00000100664 | UACAAAG  |
| ENSG00000100664 | UGCUCAC  |
| ENSG00000100664 | UGUAUAA  |
| ENSG00000100664 | UUGGCAC  |
| ENSG00000100678 | AUGACAC  |
| ENSG00000100678 | UGCCUG   |
| ENSG00000100697 | AAAGCUG  |
| ENSG00000100697 | AAGAACC  |
| ENSG00000100697 | AAGGCAC  |
| ENSG00000100697 | AAGUGCA  |
| ENSG00000100697 | AAGUUGU  |

|                 |         |
|-----------------|---------|
| ENSG00000100697 | AGCACCA |
| ENSG00000100697 | AGCAGCA |
| ENSG00000100697 | AGUGCCU |
| ENSG00000100697 | AUAAUAC |
| ENSG00000100697 | AUGAGCU |
| ENSG00000100697 | AUGUCUG |
| ENSG00000100697 | CAGCAA  |
| ENSG00000100697 | CAGUGCA |
| ENSG00000100697 | CCCUGAG |
| ENSG00000100697 | CUGCUC  |
| ENSG00000100697 | CUUUGGU |
| ENSG00000100697 | GAGGUAG |
| ENSG00000100697 | GAUAUGU |
| ENSG00000100697 | GCUACAU |
| ENSG00000100697 | GGAGUGU |
| ENSG00000100697 | GGCAAGA |
| ENSG00000100697 | GUGCAA  |
| ENSG00000100697 | GUAAGGA |
| ENSG00000100697 | UAAUACA |
| ENSG00000100697 | UAUUACC |
| ENSG00000100697 | UGAAAUG |
| ENSG00000100697 | UGAGAAU |
| ENSG00000100697 | UGAUCCA |
| ENSG00000100697 | UGCAGCU |
| ENSG00000100697 | UGGUACC |
| ENSG00000100697 | UCCUCG  |
| ENSG00000100697 | UUGAGGC |
| ENSG00000100697 | UUUCAAC |
| ENSG00000100711 | AAGGCAC |
| ENSG00000100711 | AUACAAG |
| ENSG00000100711 | CAUAUUG |
| ENSG00000100722 | AUAUUAU |
| ENSG00000100722 | CAUAUUG |
| ENSG00000100722 | UACAAAG |
| ENSG00000100726 | CUACAAA |
| ENSG00000100726 | UACAAAG |
| ENSG00000100731 | AAAGAGG |
| ENSG00000100731 | AAUCUCA |
| ENSG00000100731 | AUCCUUG |
| ENSG00000100731 | GACCAUG |
| ENSG00000100731 | GAGGCUG |
| ENSG00000100731 | GCACCAU |
| ENSG00000100731 | GCUGGUG |
| ENSG00000100731 | GGCAGUG |
| ENSG00000100731 | GGCUGCG |
| ENSG00000100731 | GUUCAUG |
| ENSG00000100731 | UAGGUAU |
| ENSG00000100731 | UCACAGG |
| ENSG00000100731 | UCCUGU  |
| ENSG00000100731 | UCUCAAG |
| ENSG00000100731 | UGCAUAG |
| ENSG00000100731 | UGCAUUG |
| ENSG00000100731 | UGGCUGC |
| ENSG00000100731 | UGUUGAA |
| ENSG00000100731 | UUCAAAU |
| ENSG00000100731 | UCCUCG  |
| ENSG00000100731 | UUGGCAC |
| ENSG00000100744 | AGCAAAA |
| ENSG00000100744 | AUUCAUU |
| ENSG00000100744 | CUUUGGU |
| ENSG00000100744 | GUGCUUG |
| ENSG00000100744 | UGUGCUU |
| ENSG00000100796 | AAAAACC |
| ENSG00000100796 | ACUCAGG |

|                 |         |
|-----------------|---------|
| ENSG00000100796 | AGGCAGG |
| ENSG00000100796 | AUAUUAU |
| ENSG00000100796 | AUGCACC |
| ENSG00000100796 | CCUGUU  |
| ENSG00000100796 | CUCAGGG |
| ENSG00000100796 | CUGCAGC |
| ENSG00000100796 | CUGCAGG |
| ENSG00000100796 | GAGAAAU |
| ENSG00000100796 | GAUUGUA |
| ENSG00000100796 | GGCAUUG |
| ENSG00000100796 | UAUUGCU |
| ENSG00000100796 | UCCAGAG |
| ENSG00000100796 | UCCUGU  |
| ENSG00000100796 | UGCCUG  |
| ENSG00000100796 | UCCAUA  |
| ENSG00000100796 | UUGGCAC |
| ENSG00000100811 | AAAAAUC |
| ENSG00000100811 | ACAGGUG |
| ENSG00000100811 | ACAUUCA |
| ENSG00000100811 | ACUGCAG |
| ENSG00000100811 | ACUGCAU |
| ENSG00000100811 | ACUUGGA |
| ENSG00000100811 | AGCACCA |
| ENSG00000100811 | AUGCACC |
| ENSG00000100811 | AUGCAUU |
| ENSG00000100811 | CACUGUU |
| ENSG00000100811 | GGCAGUG |
| ENSG00000100811 | UAUAAAG |
| ENSG00000100811 | UGAAGUG |
| ENSG00000100813 | ACUGCAG |
| ENSG00000100813 | AUAAAGU |
| ENSG00000100813 | CUGCAGG |
| ENSG00000100813 | UAUAAAG |
| ENSG00000100813 | UGCAGCU |
| ENSG00000100836 | ACACACU |
| ENSG00000100836 | UCCAGAG |
| ENSG00000100842 | AAAGCUG |
| ENSG00000100842 | AGGCAGG |
| ENSG00000100842 | GAGAUGA |
| ENSG00000100842 | GUGCCUG |
| ENSG00000100842 | UCCAGAG |
| ENSG00000100852 | AAAGUAU |
| ENSG00000100852 | CCAGUAC |
| ENSG00000100852 | GUGCAA  |
| ENSG00000100852 | UCAACAG |
| ENSG00000100852 | UGUGCUU |
| ENSG00000100916 | AAGUGCA |
| ENSG00000100916 | AUGGCAC |
| ENSG00000100931 | UUGGCAC |
| ENSG00000100934 | GUGCCAC |
| ENSG00000100934 | UUGUUCG |
| ENSG00000100941 | AAAAGUA |
| ENSG00000100941 | AAAGUAC |
| ENSG00000100941 | AAGGCAC |
| ENSG00000100941 | AUCCUUU |
| ENSG00000100941 | GUAAACA |
| ENSG00000100941 | UACAAAG |
| ENSG00000100941 | UUAUGCA |
| ENSG00000100968 | AGCACCA |
| ENSG00000100968 | CACACCU |
| ENSG00000100968 | UCUCAA  |
| ENSG00000100968 | UCUGGAG |
| ENSG00000100979 | CUUCUCU |
| ENSG00000100987 | AAGUGCU |

|                 |          |
|-----------------|----------|
| ENSG00000100987 | AGUGCUU  |
| ENSG00000100987 | CUACAAA  |
| ENSG00000100991 | AAAGUUU  |
| ENSG00000100991 | AGGCAGG  |
| ENSG00000100991 | AUAAAAGU |
| ENSG00000100991 | GUUAAUG  |
| ENSG00000100991 | UUGGCAA  |
| ENSG00000100994 | CCAGCAU  |
| ENSG00000100997 | CACCACC  |
| ENSG00000100997 | CAGUCUG  |
| ENSG00000100997 | UCCUGAG  |
| ENSG00000101000 | UGCCAGC  |
| ENSG00000101017 | CUCUGGG  |
| ENSG00000101017 | UCCAGUU  |
| ENSG00000101019 | AAAAAUC  |
| ENSG00000101019 | AAACUGU  |
| ENSG00000101019 | AAUGUUG  |
| ENSG00000101019 | AUGUAAU  |
| ENSG00000101019 | CACUCCU  |
| ENSG00000101019 | CAGCAGA  |
| ENSG00000101019 | GUCAGUU  |
| ENSG00000101019 | UCACACA  |
| ENSG00000101019 | UCACAGG  |
| ENSG00000101019 | UCACAGU  |
| ENSG00000101019 | UGGGGGA  |
| ENSG00000101040 | AAAAACC  |
| ENSG00000101040 | ACAUUC   |
| ENSG00000101040 | ACAUUAC  |
| ENSG00000101040 | AUAAUAC  |
| ENSG00000101040 | GUAGUGU  |
| ENSG00000101040 | UGACAUC  |
| ENSG00000101057 | AGCACCA  |
| ENSG00000101057 | GAGAUGA  |
| ENSG00000101057 | GAGGGGC  |
| ENSG00000101057 | GCAGAAG  |
| ENSG00000101076 | CUCUGGG  |
| ENSG00000101076 | GAGCCCC  |
| ENSG00000101076 | GGAAUGU  |
| ENSG00000101079 | AAAGAAU  |
| ENSG00000101079 | ACCUGGA  |
| ENSG00000101079 | CCCUGAG  |
| ENSG00000101079 | GGAGGAG  |
| ENSG00000101079 | GGAGUGU  |
| ENSG00000101079 | GGAUGAG  |
| ENSG00000101079 | GGCAAGA  |
| ENSG00000101079 | UGAAAUG  |
| ENSG00000101082 | CAGCAGG  |
| ENSG00000101082 | CUGUUGA  |
| ENSG00000101082 | GGAGAGA  |
| ENSG00000101082 | GGCCCU   |
| ENSG00000101082 | UGGCCCU  |
| ENSG00000101098 | AAAGCUG  |
| ENSG00000101098 | AACAAAC  |
| ENSG00000101098 | AACCUGG  |
| ENSG00000101098 | AGGCAGG  |
| ENSG00000101098 | AGGGAGG  |
| ENSG00000101098 | AUCCUUG  |
| ENSG00000101098 | AUGAGCU  |
| ENSG00000101098 | AUGUGCC  |
| ENSG00000101098 | CAGCAGA  |
| ENSG00000101098 | CAGCAGG  |
| ENSG00000101098 | CAGGUGA  |
| ENSG00000101098 | CCAGGAG  |
| ENSG00000101098 | CGGAUCC  |

|                 |         |
|-----------------|---------|
| ENSG00000101098 | CUGCUC  |
| ENSG00000101098 | CUGGAAA |
| ENSG00000101098 | CUGGCUC |
| ENSG00000101098 | GAGCCCC |
| ENSG00000101098 | GAGCUAA |
| ENSG00000101098 | GAGGCAG |
| ENSG00000101098 | GCACCAU |
| ENSG00000101098 | GCAGGUU |
| ENSG00000101098 | GCCCUUA |
| ENSG00000101098 | GCCUGGG |
| ENSG00000101098 | GCUGGUG |
| ENSG00000101098 | GGAAUGU |
| ENSG00000101098 | GGAGAGA |
| ENSG00000101098 | GGCAGCG |
| ENSG00000101098 | GGCUCAG |
| ENSG00000101098 | GGCUGCG |
| ENSG00000101098 | GGGAGCU |
| ENSG00000101098 | GGGGAGC |
| ENSG00000101098 | GGGGUCC |
| ENSG00000101098 | GUGCUUG |
| ENSG00000101098 | UAUUGCU |
| ENSG00000101098 | UCACAGG |
| ENSG00000101098 | UCACAGU |
| ENSG00000101098 | UCCUUGC |
| ENSG00000101098 | UCUGGAA |
| ENSG00000101098 | UCUGGAG |
| ENSG00000101098 | UGCAAAG |
| ENSG00000101098 | UGGAGAU |
| ENSG00000101098 | UGUGCUU |
| ENSG00000101098 | UUGGCAC |
| ENSG00000101109 | AAAGAGG |
| ENSG00000101109 | AAAGCGC |
| ENSG00000101109 | AAAGCUG |
| ENSG00000101109 | AAGGCAC |
| ENSG00000101109 | AAGGUGC |
| ENSG00000101109 | AAGUCUU |
| ENSG00000101109 | ACAGUAC |
| ENSG00000101109 | ACAGUAU |
| ENSG00000101109 | AGCAUUC |
| ENSG00000101109 | AGCCCUU |
| ENSG00000101109 | AGGAGCU |
| ENSG00000101109 | AGUGCCU |
| ENSG00000101109 | CCUGUAC |
| ENSG00000101109 | GAGCUGC |
| ENSG00000101109 | GGAGGAG |
| ENSG00000101109 | GGAUGAG |
| ENSG00000101109 | GUGCCUG |
| ENSG00000101109 | GUGGGGA |
| ENSG00000101109 | GUUCAUG |
| ENSG00000101109 | UCAAGUA |
| ENSG00000101109 | UCACAAG |
| ENSG00000101109 | UCAUACA |
| ENSG00000101109 | UGCUGAC |
| ENSG00000101109 | UGGACUG |
| ENSG00000101109 | UUAGAGA |
| ENSG00000101109 | UUCAAGC |
| ENSG00000101115 | GAUUGUA |
| ENSG00000101115 | GAUUGUC |
| ENSG00000101126 | ACUAGAU |
| ENSG00000101126 | AGGUUAU |
| ENSG00000101126 | CAUACA  |
| ENSG00000101126 | GAUUGUA |
| ENSG00000101126 | GUCCAGA |
| ENSG00000101126 | GUCUACU |

|                 |          |
|-----------------|----------|
| ENSG00000101126 | UAAUACA  |
| ENSG00000101126 | UACAAAG  |
| ENSG00000101126 | UAUAAUA  |
| ENSG00000101126 | UAUUACC  |
| ENSG00000101126 | UUUCAAC  |
| ENSG00000101132 | UAUAAAAG |
| ENSG00000101132 | UCAAGUA  |
| ENSG00000101132 | UCAUUUG  |
| ENSG00000101132 | UUAUGCA  |
| ENSG00000101134 | GAAGGAA  |
| ENSG00000101138 | GUGAAUG  |
| ENSG00000101144 | GUGACAG  |
| ENSG00000101144 | UAUUACC  |
| ENSG00000101146 | UACAAAG  |
| ENSG00000101150 | ACUGCAU  |
| ENSG00000101150 | CACAGUG  |
| ENSG00000101150 | GAGAAAU  |
| ENSG00000101150 | UCCUGAG  |
| ENSG00000101152 | AAUACUG  |
| ENSG00000101152 | ACUGCAG  |
| ENSG00000101152 | GAAGGAA  |
| ENSG00000101152 | GGAAUGU  |
| ENSG00000101152 | GUUCAUG  |
| ENSG00000101166 | CAA AUGC |
| ENSG00000101166 | GGCUCUG  |
| ENSG00000101166 | UGAAAUG  |
| ENSG00000101166 | UUGGUCC  |
| ENSG00000101180 | CACACCU  |
| ENSG00000101180 | CAGCUGG  |
| ENSG00000101180 | GAAAACA  |
| ENSG00000101180 | GGGAGCU  |
| ENSG00000101180 | GGGCGUG  |
| ENSG00000101188 | AAAGAGG  |
| ENSG00000101188 | CCAUUAC  |
| ENSG00000101188 | UUCAAAU  |
| ENSG00000101189 | AAAAACC  |
| ENSG00000101189 | AAAAAUC  |
| ENSG00000101189 | AAAACUG  |
| ENSG00000101189 | ACAGUAU  |
| ENSG00000101189 | CUACAAA  |
| ENSG00000101189 | CUGCAGC  |
| ENSG00000101189 | CUGCAGG  |
| ENSG00000101189 | GAGGCAG  |
| ENSG00000101189 | GUGCUUG  |
| ENSG00000101189 | UACAGUU  |
| ENSG00000101189 | UCCAGUU  |
| ENSG00000101189 | UUCUGCA  |
| ENSG00000101189 | UUGGUCC  |
| ENSG00000101190 | GGAGUCC  |
| ENSG00000101191 | CCAGGAG  |
| ENSG00000101191 | CUUCACC  |
| ENSG00000101193 | AAGGCAC  |
| ENSG00000101193 | ACUGCAU  |
| ENSG00000101193 | AGCACCA  |
| ENSG00000101193 | AUAUUUAU |
| ENSG00000101193 | UCCUAUA  |
| ENSG00000101193 | UGAAAUG  |
| ENSG00000101193 | UGAUCCA  |
| ENSG00000101193 | UUCAAGC  |
| ENSG00000101193 | UUCCUAG  |
| ENSG00000101198 | GAGGCUG  |
| ENSG00000101210 | GGACCUG  |
| ENSG00000101210 | GGCGGGG  |
| ENSG00000101216 | AAAACUG  |

|                 |         |
|-----------------|---------|
| ENSG00000101216 | AAACUGU |
| ENSG00000101216 | AAAGUAC |
| ENSG00000101216 | ACAGUAU |
| ENSG00000101216 | ACUCAA  |
| ENSG00000101216 | CAAAGUG |
| ENSG00000101216 | CUUCUCU |
| ENSG00000101216 | UACAAAG |
| ENSG00000101216 | UGCAAAG |
| ENSG00000101220 | GGAAGCC |
| ENSG00000101220 | GGCAGGG |
| ENSG00000101222 | CUCCAGC |
| ENSG00000101222 | CUGGAAA |
| ENSG00000101222 | GUCUCUG |
| ENSG00000101222 | UCUGGAA |
| ENSG00000101224 | AGCAGCA |
| ENSG00000101224 | AGUGCUU |
| ENSG00000101224 | CAGUGCA |
| ENSG00000101224 | UCCCUUU |
| ENSG00000101230 | AAAGUGC |
| ENSG00000101230 | CAGUGCA |
| ENSG00000101230 | UACAAAG |
| ENSG00000101230 | UCACAUU |
| ENSG00000101230 | UCCAGAG |
| ENSG00000101230 | UUUGCAC |
| ENSG00000101236 | AACAGUC |
| ENSG00000101236 | CACUCCU |
| ENSG00000101236 | CAGCUGG |
| ENSG00000101236 | CAGUCUG |
| ENSG00000101236 | CUGGCUC |
| ENSG00000101236 | CUUCUCU |
| ENSG00000101236 | CUUUGGU |
| ENSG00000101236 | GCUGGUG |
| ENSG00000101236 | UCACAAG |
| ENSG00000101236 | UCAUGAU |
| ENSG00000101236 | UUGGUUC |
| ENSG00000101246 | AAAGUUU |
| ENSG00000101246 | CCCCAG  |
| ENSG00000101246 | UGUCUUU |
| ENSG00000101255 | AAGGCAC |
| ENSG00000101255 | UCUUGAG |
| ENSG00000101255 | UUGGCAA |
| ENSG00000101265 | ACACACU |
| ENSG00000101265 | AGCAGCA |
| ENSG00000101265 | AGUGCAA |
| ENSG00000101265 | CCAGUGC |
| ENSG00000101265 | GAGAAAU |
| ENSG00000101265 | GCAGAAG |
| ENSG00000101265 | GUGCUUG |
| ENSG00000101265 | UCCAGUU |
| ENSG00000101265 | UUGAUCA |
| ENSG00000101266 | AAAGAAU |
| ENSG00000101266 | AAAUCCC |
| ENSG00000101266 | AAUCUCU |
| ENSG00000101266 | UCUGGAG |
| ENSG00000101280 | GGCUCAG |
| ENSG00000101282 | GAAACAU |
| ENSG00000101282 | GGCAGUG |
| ENSG00000101282 | GGGCCCC |
| ENSG00000101282 | UGCAAAG |
| ENSG00000101290 | ACUCAA  |
| ENSG00000101290 | AGCAGCA |
| ENSG00000101290 | CAAAGCA |
| ENSG00000101290 | CAGCAGA |
| ENSG00000101290 | CAGCAGG |

|                 |         |
|-----------------|---------|
| ENSG00000101290 | CUGCCCC |
| ENSG00000101290 | GACUUCC |
| ENSG00000101294 | AAACUGU |
| ENSG00000101294 | AACCUGG |
| ENSG00000101294 | CCUUCUG |
| ENSG00000101298 | AGUGCAA |
| ENSG00000101298 | CAAAGCA |
| ENSG00000101298 | CAGACAG |
| ENSG00000101298 | CAGUGCA |
| ENSG00000101298 | CCAGUGC |
| ENSG00000101298 | GACUUCC |
| ENSG00000101298 | GAGGCUG |
| ENSG00000101298 | GCAGAAG |
| ENSG00000101298 | GGAGGCA |
| ENSG00000101298 | GUGCAAA |
| ENSG00000101298 | UCAUACA |
| ENSG00000101298 | UGCAAAG |
| ENSG00000101298 | UGCAUAG |
| ENSG00000101298 | UGCAUAU |
| ENSG00000101298 | UUGGAGG |
| ENSG00000101306 | AACCUGU |
| ENSG00000101306 | CCUGUAC |
| ENSG00000101306 | CCUUCUG |
| ENSG00000101306 | GAGCCCC |
| ENSG00000101306 | GGGGAGC |
| ENSG00000101306 | GGGUGGU |
| ENSG00000101306 | GGUGGUC |
| ENSG00000101306 | UGUGUGG |
| ENSG00000101310 | AGCUGCC |
| ENSG00000101311 | AAAUUUC |
| ENSG00000101311 | CAAAACU |
| ENSG00000101321 | AACACUG |
| ENSG00000101321 | AGCACCA |
| ENSG00000101323 | AACAGUC |
| ENSG00000101323 | ACCCAUU |
| ENSG00000101323 | CACAGUG |
| ENSG00000101323 | CCAGGAG |
| ENSG00000101323 | GUCUCUG |
| ENSG00000101323 | UAAUAUC |
| ENSG00000101323 | UCAAGUA |
| ENSG00000101323 | UUCCUAG |
| ENSG00000101327 | AACUGGU |
| ENSG00000101327 | AAUGCCC |
| ENSG00000101327 | AGCAUUC |
| ENSG00000101327 | CUGCUCU |
| ENSG00000101331 | AAGUAGC |
| ENSG00000101331 | AGCUGCC |
| ENSG00000101331 | AGGUAGU |
| ENSG00000101331 | CCAGGAG |
| ENSG00000101331 | GAGGAUA |
| ENSG00000101331 | GCAGGAC |
| ENSG00000101331 | GCAUCC  |
| ENSG00000101331 | GGAAGCC |
| ENSG00000101331 | GGAGGAG |
| ENSG00000101333 | AAUGCCC |
| ENSG00000101333 | AUGGCAC |
| ENSG00000101333 | UUAGAGA |
| ENSG00000101335 | GGCGGGG |
| ENSG00000101337 | AACACUG |
| ENSG00000101337 | ACAUUCA |
| ENSG00000101337 | CAGGAAC |
| ENSG00000101337 | CCAGGAG |
| ENSG00000101337 | CCUGCUG |
| ENSG00000101337 | CUACAGU |



|                 |         |
|-----------------|---------|
| ENSG00000101337 | CUCUUC  |
| ENSG00000101337 | GUGCCAC |
| ENSG00000101337 | GUGCCUG |
| ENSG00000101337 | UCCAGUU |
| ENSG00000101337 | UUGGCAC |
| ENSG00000101343 | AAAAAUC |
| ENSG00000101346 | AAUUUUA |
| ENSG00000101346 | AGCCCUU |
| ENSG00000101346 | GGCAGUG |
| ENSG00000101346 | GGCUCUG |
| ENSG00000101349 | AAAGUAC |
| ENSG00000101349 | AAUACUG |
| ENSG00000101349 | ACAUUCA |
| ENSG00000101349 | AGCAGCA |
| ENSG00000101349 | AUGGCUU |
| ENSG00000101349 | GCUAGCA |
| ENSG00000101350 | AAAACUG |
| ENSG00000101350 | AAAGAGG |
| ENSG00000101350 | AAAGGUA |
| ENSG00000101350 | AAAGUGC |
| ENSG00000101350 | AAGACAU |
| ENSG00000101350 | AAGUGCU |
| ENSG00000101350 | AGCACCA |
| ENSG00000101350 | AGCAGCA |
| ENSG00000101350 | AGCAGCU |
| ENSG00000101350 | AGUGCUU |
| ENSG00000101350 | AUGAGCU |
| ENSG00000101350 | AUGCAUU |
| ENSG00000101350 | AUGUAAU |
| ENSG00000101350 | AUUGCAC |
| ENSG00000101350 | CUCAAAC |
| ENSG00000101350 | GAAGGUC |
| ENSG00000101350 | GACCUGG |
| ENSG00000101350 | GAGAAGA |
| ENSG00000101350 | GCAGCAU |
| ENSG00000101350 | GCCUGGA |
| ENSG00000101350 | GGGAACG |
| ENSG00000101350 | UAUUACC |
| ENSG00000101350 | UAUUGCU |
| ENSG00000101350 | UCCUGAG |
| ENSG00000101350 | UGAUCCA |
| ENSG00000101350 | UGCCAGC |
| ENSG00000101350 | UUCAAGC |
| ENSG00000101350 | UCCUAG  |
| ENSG00000101350 | UUCUAAU |
| ENSG00000101350 | UUGACAC |
| ENSG00000101350 | UUGGCAA |
| ENSG00000101350 | UUUCAAC |
| ENSG00000101363 | AAGGCAC |
| ENSG00000101363 | CCAGGAG |
| ENSG00000101363 | CUGGCUC |
| ENSG00000101367 | AAAAACC |
| ENSG00000101367 | AAAGUAA |
| ENSG00000101367 | AAAGUAC |
| ENSG00000101367 | AAAGUGC |
| ENSG00000101367 | AAGGCAC |
| ENSG00000101367 | AAGUGCA |
| ENSG00000101367 | AAUCUCA |
| ENSG00000101367 | ACACACC |
| ENSG00000101367 | ACCCUGU |
| ENSG00000101367 | ACUCAAA |
| ENSG00000101367 | ACUGUAG |
| ENSG00000101367 | AGCAGCA |
| ENSG00000101367 | CAAAGUG |

|                 |         |
|-----------------|---------|
| ENSG00000101367 | CAGUAGA |
| ENSG00000101367 | CAGUAGU |
| ENSG00000101367 | CUCAAAC |
| ENSG00000101367 | GAGUAUU |
| ENSG00000101367 | GCUGGUG |
| ENSG00000101367 | GGAAGCC |
| ENSG00000101367 | GUUAAUG |
| ENSG00000101367 | UAAUACA |
| ENSG00000101367 | UGCAAAG |
| ENSG00000101367 | UGCAUUG |
| ENSG00000101367 | UUGGCAA |
| ENSG00000101367 | UUGGCAC |
| ENSG00000101384 | ACCACAG |
| ENSG00000101384 | AGUGAUC |
| ENSG00000101384 | AGUGGUU |
| ENSG00000101384 | CACAGUG |
| ENSG00000101384 | CAGUAGA |
| ENSG00000101384 | GGCAGUG |
| ENSG00000101384 | UGCAAAG |
| ENSG00000101384 | UGCAUAU |
| ENSG00000101384 | UGCUGAC |
| ENSG00000101384 | UUGUGAC |
| ENSG00000101384 | UUUGCAA |
| ENSG00000101384 | UUUGCAC |
| ENSG00000101400 | AAGGCAC |
| ENSG00000101400 | AUGGCUU |
| ENSG00000101400 | UCACAGG |
| ENSG00000101400 | UGCUCAC |
| ENSG00000101407 | GAUCGAC |
| ENSG00000101407 | UGUGUGG |
| ENSG00000101407 | UUCUAAU |
| ENSG00000101412 | AAAGCUG |
| ENSG00000101412 | AAGUGCA |
| ENSG00000101412 | AAGUGCU |
| ENSG00000101412 | CAAAGCA |
| ENSG00000101412 | CAAAGUG |
| ENSG00000101412 | CAGUCUG |
| ENSG00000101412 | CCUUCAU |
| ENSG00000101412 | CUCCAUI |
| ENSG00000101412 | GAGCCCC |
| ENSG00000101417 | AAGGCAC |
| ENSG00000101417 | GAGAAGA |
| ENSG00000101417 | GCUGGAU |
| ENSG00000101417 | GGAGUGU |
| ENSG00000101417 | GUGACUG |
| ENSG00000101417 | GUGAGGU |
| ENSG00000101417 | UCCAGAG |
| ENSG00000101417 | UCCUAUA |
| ENSG00000101417 | UGAGAAG |
| ENSG00000101417 | UGCAUAG |
| ENSG00000101417 | UGCAUAI |
| ENSG00000101417 | UUAGAGA |
| ENSG00000101438 | AAGGCGU |
| ENSG00000101438 | AUUGCAC |
| ENSG00000101438 | CACCACC |
| ENSG00000101438 | CUGGAAA |
| ENSG00000101438 | GAAAACA |
| ENSG00000101438 | UCCUGAG |
| ENSG00000101442 | CCAGGAG |
| ENSG00000101442 | CUGGGCA |
| ENSG00000101442 | GAGAAAU |
| ENSG00000101444 | AAAGUAC |
| ENSG00000101444 | ACAGUAI |
| ENSG00000101444 | CAGCAGA |

|                 |         |
|-----------------|---------|
| ENSG00000101444 | CAGCUGG |
| ENSG00000101445 | AAAGCUG |
| ENSG00000101445 | AAGGCGC |
| ENSG00000101445 | AAGUGUG |
| ENSG00000101445 | AAUUAUU |
| ENSG00000101445 | ACAGUAC |
| ENSG00000101445 | ACUCCAG |
| ENSG00000101445 | AGCUGCC |
| ENSG00000101445 | AGGUAGU |
| ENSG00000101445 | AUAUUAU |
| ENSG00000101445 | CACAGGG |
| ENSG00000101445 | CAGCAA  |
| ENSG00000101445 | CAGGUGA |
| ENSG00000101445 | CCCACCU |
| ENSG00000101445 | CUGCAGC |
| ENSG00000101445 | CUGCAGG |
| ENSG00000101445 | GAGGUAG |
| ENSG00000101445 | GCGGAGG |
| ENSG00000101445 | GGAAGCC |
| ENSG00000101445 | GGCAGCG |
| ENSG00000101445 | GGGGUGG |
| ENSG00000101445 | GUCUGCC |
| ENSG00000101445 | UACAAAG |
| ENSG00000101445 | UAUUGCU |
| ENSG00000101445 | UCACAGG |
| ENSG00000101445 | UCACAUU |
| ENSG00000101448 | CACCAGC |
| ENSG00000101452 | AUAAAGU |
| ENSG00000101457 | GGGGUGC |
| ENSG00000101460 | ACCACAG |
| ENSG00000101460 | AGGCAGG |
| ENSG00000101460 | CUGCAGC |
| ENSG00000101460 | CUGCAGG |
| ENSG00000101460 | GGCAGGG |
| ENSG00000101460 | UUCUGCA |
| ENSG00000101464 | CUGCUCA |
| ENSG00000101474 | CCAGUGU |
| ENSG00000101493 | AAAAACC |
| ENSG00000101493 | AAAACUG |
| ENSG00000101493 | AAACUGU |
| ENSG00000101493 | AAAGCUG |
| ENSG00000101493 | AAAGGUA |
| ENSG00000101493 | AACACUG |
| ENSG00000101493 | AAUUAUU |
| ENSG00000101493 | AGCCCUU |
| ENSG00000101493 | AGGUAGU |
| ENSG00000101493 | AGUAACA |
| ENSG00000101493 | AUAAUAC |
| ENSG00000101493 | AUGUGCC |
| ENSG00000101493 | CACAAUG |
| ENSG00000101493 | CCAGUGC |
| ENSG00000101493 | CCAUUAC |
| ENSG00000101493 | CCUGUU  |
| ENSG00000101493 | CUACAAA |
| ENSG00000101493 | CUAGUAA |
| ENSG00000101493 | GAGGUAG |
| ENSG00000101493 | GAGGUAU |
| ENSG00000101493 | GCCCUGU |
| ENSG00000101493 | GGAAUGU |
| ENSG00000101493 | GUUAGGA |
| ENSG00000101493 | UACAAAG |
| ENSG00000101493 | UAUAAUA |
| ENSG00000101493 | UAUUACC |
| ENSG00000101493 | UCAAGUA |

|                 |         |
|-----------------|---------|
| ENSG00000101493 | UCACACA |
| ENSG00000101493 | UCACAGG |
| ENSG00000101493 | UCACAGU |
| ENSG00000101493 | UCCAGUU |
| ENSG00000101493 | UCCUGAG |
| ENSG00000101493 | UGCAUUG |
| ENSG00000101493 | UUAGGAU |
| ENSG00000101493 | UUUGCAA |
| ENSG00000101493 | UUUGCAC |
| ENSG00000101493 | UUUUUGC |
| ENSG00000101542 | UAUUGCU |
| ENSG00000101542 | UCCAGAG |
| ENSG00000101542 | UGAUCCA |
| ENSG00000101544 | CGUGCAU |
| ENSG00000101557 | AAAGCUG |
| ENSG00000101557 | AGAUAAA |
| ENSG00000101557 | AGCAGCA |
| ENSG00000101557 | CUAGUAG |
| ENSG00000101557 | CUUUGGU |
| ENSG00000101557 | GAUUGUA |
| ENSG00000101557 | GAUUGUC |
| ENSG00000101557 | UGUAUAA |
| ENSG00000101557 | UUCCAUA |
| ENSG00000101557 | UUGAUCA |
| ENSG00000101558 | AAAGGUA |
| ENSG00000101558 | AACAGUC |
| ENSG00000101558 | AACAUUC |
| ENSG00000101558 | AACCGUU |
| ENSG00000101558 | AAGUGCU |
| ENSG00000101558 | ACAUUAC |
| ENSG00000101558 | AUACCUC |
| ENSG00000101558 | CAUAUUG |
| ENSG00000101558 | CCAGUAC |
| ENSG00000101558 | CUUGUAU |
| ENSG00000101558 | GCAACUU |
| ENSG00000101558 | GCACCAU |
| ENSG00000101558 | GCAGGAC |
| ENSG00000101558 | GGCAUUG |
| ENSG00000101558 | GUAAACA |
| ENSG00000101558 | GUAACAG |
| ENSG00000101558 | GUCAACA |
| ENSG00000101558 | GUCCAGA |
| ENSG00000101558 | UAUAUGA |
| ENSG00000101558 | UCCAGUU |
| ENSG00000101558 | UCCUGAG |
| ENSG00000101558 | UCUUGAG |
| ENSG00000101558 | UGACAUC |
| ENSG00000101558 | UGCUCAC |
| ENSG00000101558 | UGGGACA |
| ENSG00000101558 | UUCUAAU |
| ENSG00000101558 | UUCUUGU |
| ENSG00000101558 | UUUGCAC |
| ENSG00000101574 | UCACAAG |
| ENSG00000101577 | AAUACUG |
| ENSG00000101577 | ACACACU |
| ENSG00000101577 | ACUGGAU |
| ENSG00000101577 | AGUACUG |
| ENSG00000101577 | AUGGAUU |
| ENSG00000101577 | GAAAACA |
| ENSG00000101577 | GACAACU |
| ENSG00000101577 | GAGAAGA |
| ENSG00000101577 | GCACCAU |
| ENSG00000101577 | GCAGAAG |
| ENSG00000101577 | GGAUUUU |

|                 |          |
|-----------------|----------|
| ENSG00000101577 | GUCAUUG  |
| ENSG00000101577 | UCACAGG  |
| ENSG00000101577 | UCACAGU  |
| ENSG00000101577 | UCAUUUG  |
| ENSG00000101577 | UCUGGAA  |
| ENSG00000101624 | AACUACU  |
| ENSG00000101624 | AAUUUUA  |
| ENSG00000101638 | AAUUGCU  |
| ENSG00000101638 | GUGCUUG  |
| ENSG00000101638 | UAUAAAG  |
| ENSG00000101654 | AAUACUG  |
| ENSG00000101654 | ACAUUAC  |
| ENSG00000101654 | ACUGUAG  |
| ENSG00000101654 | CUUCUCU  |
| ENSG00000101665 | AACAUUC  |
| ENSG00000101665 | AAGAACC  |
| ENSG00000101665 | AAUCUCA  |
| ENSG00000101665 | ACAUUCA  |
| ENSG00000101665 | AGCAGCG  |
| ENSG00000101665 | AGCAGCU  |
| ENSG00000101665 | AGUAGUU  |
| ENSG00000101665 | AUAUUUAU |
| ENSG00000101665 | CAGCAA   |
| ENSG00000101665 | CCAGGAG  |
| ENSG00000101665 | CUCAAAC  |
| ENSG00000101665 | CUUCUCU  |
| ENSG00000101665 | GGCAUUG  |
| ENSG00000101665 | GUUCAUG  |
| ENSG00000101665 | UAUAAAG  |
| ENSG00000101665 | UCAUUUG  |
| ENSG00000101665 | UCUCAAG  |
| ENSG00000101665 | UGAGAAU  |
| ENSG00000101665 | UGCAUUG  |
| ENSG00000101665 | UGGUACC  |
| ENSG00000101665 | UUGGCAA  |
| ENSG00000101665 | UUGGCAC  |
| ENSG00000101670 | CAGCAGA  |
| ENSG00000101670 | CAGCAGG  |
| ENSG00000101670 | UUGGCAA  |
| ENSG00000101680 | GAGGUAU  |
| ENSG00000101695 | ACAGUAC  |
| ENSG00000101695 | AGCAAAA  |
| ENSG00000101695 | AGCCCUU  |
| ENSG00000101695 | AUAAAGU  |
| ENSG00000101695 | CAGCAA   |
| ENSG00000101695 | CCUGUAC  |
| ENSG00000101695 | GCAGCAU  |
| ENSG00000101695 | GCCCUUA  |
| ENSG00000101695 | UAAUAGU  |
| ENSG00000101695 | UACAGUU  |
| ENSG00000101695 | UCCUCU   |
| ENSG00000101695 | UUUGCAA  |
| ENSG00000101745 | AAAGAAU  |
| ENSG00000101745 | AAAUUUC  |
| ENSG00000101745 | AACUACU  |
| ENSG00000101745 | AACUCUA  |
| ENSG00000101745 | AAGUGCA  |
| ENSG00000101745 | AAUCACU  |
| ENSG00000101745 | AAUCCUU  |
| ENSG00000101745 | ACCCUGU  |
| ENSG00000101745 | AGCCCUU  |
| ENSG00000101745 | AGUGCAA  |
| ENSG00000101745 | AGUGCUU  |
| ENSG00000101745 | AUAAAGU  |

|                 |         |
|-----------------|---------|
| ENSG00000101745 | AUACAAG |
| ENSG00000101745 | AUCCCUU |
| ENSG00000101745 | CCAGUGC |
| ENSG00000101745 | CUUUGGU |
| ENSG00000101745 | GACCAUG |
| ENSG00000101745 | GCCCUUA |
| ENSG00000101745 | GUGCAAA |
| ENSG00000101745 | GUGCCAC |
| ENSG00000101745 | GUUCAUG |
| ENSG00000101745 | UAAUAUC |
| ENSG00000101745 | UAUAAUA |
| ENSG00000101745 | UCAUGAU |
| ENSG00000101745 | UCAUUCG |
| ENSG00000101745 | UCCCUUU |
| ENSG00000101745 | UCCUGAG |
| ENSG00000101745 | UCCUUGC |
| ENSG00000101745 | UUCUGCA |
| ENSG00000101746 | AAAGUGC |
| ENSG00000101746 | AACAUUC |
| ENSG00000101746 | AAGGCAC |
| ENSG00000101746 | AAGUGCA |
| ENSG00000101746 | ACAUUCA |
| ENSG00000101746 | AGUGCAA |
| ENSG00000101746 | CACAGUG |
| ENSG00000101746 | CAGUUAC |
| ENSG00000101746 | GAUUGUC |
| ENSG00000101746 | GUCACUC |
| ENSG00000101746 | GUGCAAA |
| ENSG00000101746 | UCACAGU |
| ENSG00000101751 | AAGUAGC |
| ENSG00000101751 | ACAUUAC |
| ENSG00000101751 | AUUCAUU |
| ENSG00000101751 | CCUUCUG |
| ENSG00000101751 | CCUUCUU |
| ENSG00000101751 | UCAUUCG |
| ENSG00000101751 | UCUGGAA |
| ENSG00000101752 | AGAUGUG |
| ENSG00000101752 | AGCACCA |
| ENSG00000101752 | AGCAGCG |
| ENSG00000101752 | AGCAGCU |
| ENSG00000101752 | AGUAGAC |
| ENSG00000101752 | AGUGCAA |
| ENSG00000101752 | CCCUGAG |
| ENSG00000101752 | CUCCAA  |
| ENSG00000101752 | CUUACAG |
| ENSG00000101752 | GCACCAU |
| ENSG00000101752 | GUAACAG |
| ENSG00000101752 | GUGCAAA |
| ENSG00000101752 | UAGGUAU |
| ENSG00000101752 | UCCUAUA |
| ENSG00000101752 | UCCUGAG |
| ENSG00000101752 | UUCAAGC |
| ENSG00000101782 | AGCACCA |
| ENSG00000101782 | AGGUAGU |
| ENSG00000101782 | CACUCCU |
| ENSG00000101782 | CUGGAAA |
| ENSG00000101782 | GAAAACA |
| ENSG00000101782 | GAGGUAG |
| ENSG00000101782 | GCACCAU |
| ENSG00000101782 | UGAAAUG |
| ENSG00000101825 | AAGUCUU |
| ENSG00000101825 | CUUGUAU |
| ENSG00000101842 | CAGGAAC |
| ENSG00000101843 | CUGGAAA |

|                 |         |
|-----------------|---------|
| ENSG00000101846 | CCUUCAU |
| ENSG00000101846 | UCAUUUG |
| ENSG00000101846 | UCUGGAA |
| ENSG00000101849 | AAAACUG |
| ENSG00000101849 | AAAGUGC |
| ENSG00000101849 | AACUGGU |
| ENSG00000101849 | AAGUGCA |
| ENSG00000101849 | ACAAGGU |
| ENSG00000101849 | ACCCUGU |
| ENSG00000101849 | AUGAGCU |
| ENSG00000101849 | CAAAACU |
| ENSG00000101849 | CAAAGCA |
| ENSG00000101849 | CAAAGUG |
| ENSG00000101849 | CCUGUAC |
| ENSG00000101849 | CUGGCUC |
| ENSG00000101849 | CUUACAG |
| ENSG00000101849 | GAAGGAA |
| ENSG00000101849 | GAGCUAA |
| ENSG00000101849 | GCCCUUA |
| ENSG00000101849 | GCUGGUG |
| ENSG00000101849 | GGAGGAG |
| ENSG00000101849 | GGUUUAC |
| ENSG00000101849 | GUAAACA |
| ENSG00000101849 | UACAGUU |
| ENSG00000101849 | UCACACA |
| ENSG00000101849 | UCUAGAG |
| ENSG00000101849 | UUGGCAA |
| ENSG00000101849 | UUGGUCC |
| ENSG00000101849 | UUGGUUC |
| ENSG00000101856 | AACACUG |
| ENSG00000101856 | CAAAGCA |
| ENSG00000101856 | UAGAGGA |
| ENSG00000101856 | UUAGAGA |
| ENSG00000101856 | UUCUAAU |
| ENSG00000101868 | AAGUAGC |
| ENSG00000101868 | GGAAUGU |
| ENSG00000101871 | AAAAAUC |
| ENSG00000101871 | AAACUGU |
| ENSG00000101871 | AAAGUGC |
| ENSG00000101871 | AACCUGU |
| ENSG00000101871 | AACUCUA |
| ENSG00000101871 | AAGGCAC |
| ENSG00000101871 | AAGUGCA |
| ENSG00000101871 | AAUUAAU |
| ENSG00000101871 | ACUGGA  |
| ENSG00000101871 | ACUGCAG |
| ENSG00000101871 | ACUGUAG |
| ENSG00000101871 | AUUCAUU |
| ENSG00000101871 | CAAAGUG |
| ENSG00000101871 | CCUGUAC |
| ENSG00000101871 | UACAAAG |
| ENSG00000101871 | UAUAAUA |
| ENSG00000101871 | UGGUACC |
| ENSG00000101882 | AAGGCAC |
| ENSG00000101888 | AAGGCAC |
| ENSG00000101888 | AAGGUGC |
| ENSG00000101888 | AGCUGCC |
| ENSG00000101888 | AUGGCUU |
| ENSG00000101888 | GAGGUAG |
| ENSG00000101888 | GCUGGAU |
| ENSG00000101892 | AAAAAUC |
| ENSG00000101892 | AAAGAAU |
| ENSG00000101892 | AAUGUUG |
| ENSG00000101892 | AGCAGCA |

|                 |          |
|-----------------|----------|
| ENSG00000101892 | CCCCUGG  |
| ENSG00000101892 | CCCUGUU  |
| ENSG00000101892 | CUGGCUC  |
| ENSG00000101892 | UCCACA   |
| ENSG00000101892 | UCCUGU   |
| ENSG00000101892 | UGAAGCU  |
| ENSG00000101892 | UGAUCCA  |
| ENSG00000101911 | CUUUGGU  |
| ENSG00000101911 | UUGGCAA  |
| ENSG00000101928 | AAUCCUU  |
| ENSG00000101928 | ACAUUCA  |
| ENSG00000101928 | AUCCUUG  |
| ENSG00000101928 | CAGUCCA  |
| ENSG00000101928 | CAGUGCA  |
| ENSG00000101928 | GAUCAGA  |
| ENSG00000101928 | GGAGUGU  |
| ENSG00000101928 | UAUAAAG  |
| ENSG00000101935 | AAACUGU  |
| ENSG00000101935 | AACGGAA  |
| ENSG00000101935 | AAGUCAC  |
| ENSG00000101935 | ACAGUAC  |
| ENSG00000101935 | ACAGUAU  |
| ENSG00000101935 | ACAUCAC  |
| ENSG00000101935 | ACUAGAU  |
| ENSG00000101935 | ACUCCAG  |
| ENSG00000101935 | AGCACCA  |
| ENSG00000101935 | AGCAGCA  |
| ENSG00000101935 | AGGCAGG  |
| ENSG00000101935 | AUCACUA  |
| ENSG00000101935 | AUCCUUU  |
| ENSG00000101935 | CAGUGCA  |
| ENSG00000101935 | CUUUGGU  |
| ENSG00000101935 | GACCUGG  |
| ENSG00000101935 | GAGAUGA  |
| ENSG00000101935 | GCAGGAC  |
| ENSG00000101935 | GGCUCAG  |
| ENSG00000101935 | GUGACUG  |
| ENSG00000101935 | UAUUACC  |
| ENSG00000101935 | UAUUGCU  |
| ENSG00000101935 | UCAAGUA  |
| ENSG00000101935 | UGCAUUAU |
| ENSG00000101935 | UGCUGAC  |
| ENSG00000101935 | UGGGUAC  |
| ENSG00000101935 | UGUGCGG  |
| ENSG00000101935 | UUGGUUC  |
| ENSG00000101938 | AACCUGG  |
| ENSG00000101938 | AGCCUGC  |
| ENSG00000101938 | CACUGUU  |
| ENSG00000101938 | CAGUCCA  |
| ENSG00000101938 | CUGCAGC  |
| ENSG00000101938 | CUGUUGA  |
| ENSG00000101938 | UAGGGCC  |
| ENSG00000101938 | UGCAGCU  |
| ENSG00000101938 | UUCUUGU  |
| ENSG00000101945 | AGUGCAA  |
| ENSG00000101945 | CCCUGAG  |
| ENSG00000101945 | CCUUCUG  |
| ENSG00000101945 | GCAGAAG  |
| ENSG00000101945 | GUGCCUG  |
| ENSG00000101945 | UCCUCU   |
| ENSG00000101945 | UCCUGU   |
| ENSG00000101945 | UUCAAGC  |
| ENSG00000101945 | UUCCUAG  |
| ENSG00000101945 | UUUCAAC  |



|                 |          |
|-----------------|----------|
| ENSG00000101955 | ACAUCAC  |
| ENSG00000101955 | UACAAAG  |
| ENSG00000101966 | AAAGUGC  |
| ENSG00000101966 | AACAAAC  |
| ENSG00000101966 | AAGACAU  |
| ENSG00000101966 | AAGUAGC  |
| ENSG00000101966 | AAUACUG  |
| ENSG00000101966 | AAUCCUU  |
| ENSG00000101966 | AAUCUCA  |
| ENSG00000101966 | ACAUUCA  |
| ENSG00000101966 | AGCAAAA  |
| ENSG00000101966 | AGGCAGG  |
| ENSG00000101966 | AGUAGUU  |
| ENSG00000101966 | AUAAAAGU |
| ENSG00000101966 | GAAACAU  |
| ENSG00000101966 | GAUUGUC  |
| ENSG00000101966 | GGAAGAC  |
| ENSG00000101966 | GGUCUAG  |
| ENSG00000101966 | GUUAGGA  |
| ENSG00000101966 | UAUAAUA  |
| ENSG00000101966 | UCAACAG  |
| ENSG00000101966 | UCACAGG  |
| ENSG00000101966 | UCAUUUG  |
| ENSG00000101966 | UUCUAAU  |
| ENSG00000101966 | UUGAUCA  |
| ENSG00000101966 | UUGGCAC  |
| ENSG00000101972 | AAAGUAA  |
| ENSG00000101972 | AACAAAC  |
| ENSG00000101972 | AACCUGG  |
| ENSG00000101972 | AAGACAU  |
| ENSG00000101972 | AAGUUGU  |
| ENSG00000101972 | ACAUUAC  |
| ENSG00000101972 | ACUGGAU  |
| ENSG00000101972 | AGCACCA  |
| ENSG00000101972 | CAAAACU  |
| ENSG00000101972 | CACUGUU  |
| ENSG00000101972 | CAGCAGA  |
| ENSG00000101972 | CUCUUCC  |
| ENSG00000101972 | CUGCCCC  |
| ENSG00000101972 | CUUCACC  |
| ENSG00000101972 | GAAGGAA  |
| ENSG00000101972 | GAGUUGA  |
| ENSG00000101972 | UAUAAAAG |
| ENSG00000101972 | UCCACA   |
| ENSG00000101972 | UCCACC   |
| ENSG00000101972 | UCUCAAG  |
| ENSG00000101972 | UGUAUAA  |
| ENSG00000101972 | UUAGAGA  |
| ENSG00000101974 | AAAUUUC  |
| ENSG00000101974 | ACAUCAC  |
| ENSG00000101974 | ACCAAUU  |
| ENSG00000101974 | AUUGCAC  |
| ENSG00000101974 | CAA AUGC |
| ENSG00000101974 | CUUUGGU  |
| ENSG00000101974 | GGCAUUG  |
| ENSG00000101974 | UCCUGAG  |
| ENSG00000101977 | AAGGCAC  |
| ENSG00000101986 | AAGGCAC  |
| ENSG00000101986 | CCUUCAU  |
| ENSG00000101986 | CUUUGGU  |
| ENSG00000101986 | GGCAGUG  |
| ENSG00000101986 | UUGGCAA  |
| ENSG00000101997 | AAACUGU  |
| ENSG00000101997 | GAGCCCU  |

|                 |         |
|-----------------|---------|
| ENSG00000101997 | GGCAGGG |
| ENSG00000102003 | AGAUAAA |
| ENSG00000102003 | AUAAUAC |
| ENSG00000102003 | CACAGGG |
| ENSG00000102003 | CAGCAA  |
| ENSG00000102003 | GAGACCU |
| ENSG00000102003 | GCAGGAC |
| ENSG00000102003 | GGCUCAG |
| ENSG00000102003 | GGGGCAG |
| ENSG00000102003 | GGUGGUU |
| ENSG00000102003 | UCACAGG |
| ENSG00000102003 | UCUGGAA |
| ENSG00000102003 | UCUGGAG |
| ENSG00000102003 | UUGUUCG |
| ENSG00000102007 | AAGGCAC |
| ENSG00000102007 | GCAGAAG |
| ENSG00000102007 | UGGCCAC |
| ENSG00000102024 | AAUACUG |
| ENSG00000102024 | AUGCACC |
| ENSG00000102034 | AGGUAGU |
| ENSG00000102034 | CUGGGCA |
| ENSG00000102034 | GAGGUAG |
| ENSG00000102038 | CAAAGCA |
| ENSG00000102038 | UAAUACA |
| ENSG00000102038 | UUCAAAU |
| ENSG00000102053 | ACAUUAC |
| ENSG00000102053 | AGCAGCA |
| ENSG00000102053 | AGGCAGG |
| ENSG00000102053 | AUACAAG |
| ENSG00000102053 | CACACCG |
| ENSG00000102053 | CACAGUG |
| ENSG00000102053 | CCCUGAG |
| ENSG00000102053 | GAGGCAG |
| ENSG00000102053 | GCAGCAU |
| ENSG00000102053 | GGCAGUG |
| ENSG00000102053 | GUCAUUG |
| ENSG00000102053 | GUGACAG |
| ENSG00000102053 | GUGCCAC |
| ENSG00000102053 | GUGUCAC |
| ENSG00000102053 | UCACAGG |
| ENSG00000102053 | UCACAGU |
| ENSG00000102053 | UCACAUU |
| ENSG00000102053 | UCAUGAU |
| ENSG00000102053 | UCUCAAG |
| ENSG00000102053 | UGCAGCU |
| ENSG00000102054 | UGCAAAG |
| ENSG00000102057 | ACUCCAG |
| ENSG00000102057 | CUGCAGC |
| ENSG00000102057 | CUGGACU |
| ENSG00000102057 | GUCCAGA |
| ENSG00000102057 | UAUUGCU |
| ENSG00000102057 | UGCAUUA |
| ENSG00000102057 | UGUGCUU |
| ENSG00000102069 | AAAUGGU |
| ENSG00000102069 | AACAAAC |
| ENSG00000102069 | AACUGGU |
| ENSG00000102069 | AAUCACU |
| ENSG00000102069 | AGCUGCC |
| ENSG00000102069 | AGUGCUU |
| ENSG00000102069 | AUGUCUG |
| ENSG00000102069 | CCAUUAC |
| ENSG00000102069 | CCUUCAU |
| ENSG00000102069 | UAAGACU |
| ENSG00000102069 | UAGACUG |

|                 |         |
|-----------------|---------|
| ENSG00000102069 | UCACAAG |
| ENSG00000102069 | UCACAGG |
| ENSG00000102069 | UCAUUCG |
| ENSG00000102069 | UCCAGAG |
| ENSG00000102069 | UGUCUGG |
| ENSG00000102078 | AUGCCUU |
| ENSG00000102081 | AAGGCAC |
| ENSG00000102081 | ACAGUAC |
| ENSG00000102081 | ACAUUCA |
| ENSG00000102081 | AUCAUAC |
| ENSG00000102081 | AUGCAUU |
| ENSG00000102081 | CAAGAGC |
| ENSG00000102081 | CUGUUGA |
| ENSG00000102081 | CUUACAG |
| ENSG00000102081 | CUUUGGU |
| ENSG00000102081 | GAAGGUC |
| ENSG00000102081 | GAGGCAG |
| ENSG00000102081 | UCAUACA |
| ENSG00000102081 | UGCAUAG |
| ENSG00000102081 | UUGGCAC |
| ENSG00000102096 | AUGGCUU |
| ENSG00000102096 | CCCUGUC |
| ENSG00000102096 | CCCUGUU |
| ENSG00000102096 | CUGGGCA |
| ENSG00000102096 | GUCAACA |
| ENSG00000102096 | UCCCUGU |
| ENSG00000102096 | UGGGAUC |
| ENSG00000102098 | AGUGCAA |
| ENSG00000102098 | CAGUGCA |
| ENSG00000102098 | GGCAGUG |
| ENSG00000102098 | GUGCAA  |
| ENSG00000102098 | UCCCUUG |
| ENSG00000102098 | UGCAAAG |
| ENSG00000102098 | UGCAUAG |
| ENSG00000102098 | UGCAU   |
| ENSG00000102100 | AACAAAC |
| ENSG00000102100 | GCAGGUU |
| ENSG00000102100 | UGAUCCA |
| ENSG00000102100 | UUGGCAA |
| ENSG00000102100 | UUGGCAC |
| ENSG00000102104 | UGAAAUG |
| ENSG00000102119 | AAGGCAC |
| ENSG00000102125 | CCCUGAG |
| ENSG00000102144 | AAAGU   |
| ENSG00000102144 | AACAAAC |
| ENSG00000102144 | AAUGCCC |
| ENSG00000102144 | AUGACAC |
| ENSG00000102144 | CAGGAAC |
| ENSG00000102144 | GAGAUGA |
| ENSG00000102144 | GGGAUCG |
| ENSG00000102144 | UGGGAUC |
| ENSG00000102144 | UCCAUA  |
| ENSG00000102158 | GAUUGUA |
| ENSG00000102158 | UGGAUAA |
| ENSG00000102172 | UCACAUU |
| ENSG00000102178 | CUGCCCC |
| ENSG00000102181 | AAAGCUG |
| ENSG00000102189 | AAAGUGC |
| ENSG00000102189 | AAGACAU |
| ENSG00000102189 | AGGUAGU |
| ENSG00000102189 | AUGCACC |
| ENSG00000102189 | CAAAGUG |
| ENSG00000102189 | GAGGUAG |
| ENSG00000102189 | GGCAGUG |

|                 |         |
|-----------------|---------|
| ENSG00000102189 | GUGCAAA |
| ENSG00000102189 | UAAGACG |
| ENSG00000102189 | UCACAUU |
| ENSG00000102189 | UCCAGUU |
| ENSG00000102189 | UGAUCCA |
| ENSG00000102189 | UGUGUGG |
| ENSG00000102189 | UUGGCAA |
| ENSG00000102189 | UUGGCAC |
| ENSG00000102189 | UUGUGAC |
| ENSG00000102189 | UUGUGUC |
| ENSG00000102218 | AAUCUCA |
| ENSG00000102218 | UAUUACC |
| ENSG00000102218 | UCAAGUA |
| ENSG00000102221 | AAAAGUA |
| ENSG00000102221 | AAAGUAU |
| ENSG00000102221 | AACAAAC |
| ENSG00000102221 | AAUACUG |
| ENSG00000102221 | AAUUAUU |
| ENSG00000102221 | AAUUUUA |
| ENSG00000102230 | AAAGUGC |
| ENSG00000102230 | AGCACCA |
| ENSG00000102230 | AGGGAGG |
| ENSG00000102230 | AGGUAGU |
| ENSG00000102230 | AGUGCAA |
| ENSG00000102230 | CAAAGCA |
| ENSG00000102230 | CAAAGUG |
| ENSG00000102230 | CAUAUUG |
| ENSG00000102230 | CUUGGGC |
| ENSG00000102230 | GAGGUAG |
| ENSG00000102230 | GCAGGUU |
| ENSG00000102230 | UAUAAAG |
| ENSG00000102230 | UCACAAG |
| ENSG00000102230 | UCCAGUU |
| ENSG00000102230 | UCCCUUU |
| ENSG00000102230 | UGCCUG  |
| ENSG00000102245 | AGGCAGG |
| ENSG00000102245 | AUGUCUG |
| ENSG00000102245 | UAUAAAG |
| ENSG00000102245 | UGUCUGC |
| ENSG00000102287 | AAGUCAC |
| ENSG00000102287 | ACCCAUU |
| ENSG00000102287 | AGCAGCA |
| ENSG00000102287 | CACAGGG |
| ENSG00000102287 | CAGCAGA |
| ENSG00000102287 | GAGGCUG |
| ENSG00000102287 | GGCAUUG |
| ENSG00000102287 | UCACACA |
| ENSG00000102287 | UCACAGG |
| ENSG00000102287 | UGCUGAC |
| ENSG00000102287 | UUGAGGC |
| ENSG00000102290 | ACACACU |
| ENSG00000102290 | ACCACAG |
| ENSG00000102290 | CCUGCUG |
| ENSG00000102290 | CUGGAAA |
| ENSG00000102290 | CUGGGCA |
| ENSG00000102290 | UCCUAUA |
| ENSG00000102290 | UUGGCAC |
| ENSG00000102302 | AAAGUGC |
| ENSG00000102302 | AAUACUG |
| ENSG00000102302 | AGCAUUC |
| ENSG00000102302 | CAUGGGU |
| ENSG00000102302 | CCAGCAU |
| ENSG00000102302 | GGAGGCA |
| ENSG00000102302 | GGCCUG  |

|                 |          |
|-----------------|----------|
| ENSG00000102302 | UGACUGU  |
| ENSG00000102302 | UGGCCCU  |
| ENSG00000102302 | UUGUGAC  |
| ENSG00000102316 | UGGCUGC  |
| ENSG00000102317 | CCAGUAC  |
| ENSG00000102317 | CUUGUGU  |
| ENSG00000102317 | GAUCAGA  |
| ENSG00000102317 | UAUAAAG  |
| ENSG00000102317 | UCCAGUU  |
| ENSG00000102317 | UCCUUGC  |
| ENSG00000102317 | UGCAGCU  |
| ENSG00000102359 | CUGGCUC  |
| ENSG00000102385 | AAAGAGC  |
| ENSG00000102385 | AACAAAC  |
| ENSG00000102385 | ACCACAG  |
| ENSG00000102385 | AGCACCA  |
| ENSG00000102385 | AGGUUAU  |
| ENSG00000102385 | CACAGUG  |
| ENSG00000102385 | CAGCAAA  |
| ENSG00000102385 | CAGCAGG  |
| ENSG00000102385 | CAGUCCA  |
| ENSG00000102385 | CUGGAAA  |
| ENSG00000102385 | GAGGUUAU |
| ENSG00000102385 | GGAGAGA  |
| ENSG00000102385 | GUGACUG  |
| ENSG00000102385 | UAGUGAG  |
| ENSG00000102385 | UAUAAAG  |
| ENSG00000102387 | AGCAGCA  |
| ENSG00000102401 | AAUGCCC  |
| ENSG00000102401 | CAGCAAA  |
| ENSG00000102445 | AGCAGCA  |
| ENSG00000102445 | AGCAGCG  |
| ENSG00000102445 | AGCAGCU  |
| ENSG00000102445 | UCUCAAG  |
| ENSG00000102452 | UGCUGAC  |
| ENSG00000102468 | ACAAUAU  |
| ENSG00000102468 | CAA AUGC |
| ENSG00000102468 | CUGCUCA  |
| ENSG00000102471 | GGAAUGU  |
| ENSG00000102531 | AAGACAU  |
| ENSG00000102531 | AAUCUCU  |
| ENSG00000102531 | ACAUUAC  |
| ENSG00000102531 | ACAUUCA  |
| ENSG00000102531 | AGCAGCU  |
| ENSG00000102531 | CAAAGCA  |
| ENSG00000102531 | CAAAGUG  |
| ENSG00000102531 | GAGGUUAU |
| ENSG00000102531 | GUGCAAA  |
| ENSG00000102531 | UAAGACG  |
| ENSG00000102531 | UAAGACU  |
| ENSG00000102531 | UCACAGG  |
| ENSG00000102531 | UCACAGU  |
| ENSG00000102531 | UGCAAAG  |
| ENSG00000102543 | AAGUGCA  |
| ENSG00000102572 | AAAGCUG  |
| ENSG00000102572 | AAUCACU  |
| ENSG00000102572 | ACAAGGU  |
| ENSG00000102572 | ACUCCAG  |
| ENSG00000102572 | AGCAUUC  |
| ENSG00000102572 | AGGAGCU  |
| ENSG00000102572 | AUACAAG  |
| ENSG00000102572 | AUGCACC  |
| ENSG00000102572 | AUGUAAU  |
| ENSG00000102572 | AUGUGCC  |

|                 |          |
|-----------------|----------|
| ENSG00000102572 | CUACAGU  |
| ENSG00000102572 | GAGGUAG  |
| ENSG00000102572 | GAGUAU   |
| ENSG00000102572 | UAUAAAG  |
| ENSG00000102572 | UGGCCAC  |
| ENSG00000102572 | UGUGCUU  |
| ENSG00000102572 | UUAUGCA  |
| ENSG00000102572 | UUCUAAU  |
| ENSG00000102606 | AACAUUC  |
| ENSG00000102606 | AAGUGCA  |
| ENSG00000102606 | AAGUUGU  |
| ENSG00000102606 | ACAAUUAU |
| ENSG00000102606 | ACAUUAC  |
| ENSG00000102606 | AGCAAAA  |
| ENSG00000102606 | AUGCAUU  |
| ENSG00000102606 | CUUUGGU  |
| ENSG00000102606 | GAAAACA  |
| ENSG00000102606 | GCUAGCA  |
| ENSG00000102606 | UUGGCAC  |
| ENSG00000102678 | AAAGUUU  |
| ENSG00000102678 | AAAUUUC  |
| ENSG00000102678 | AAGUGCU  |
| ENSG00000102678 | AUGCAUU  |
| ENSG00000102678 | AUGGCAC  |
| ENSG00000102678 | CACCAGC  |
| ENSG00000102678 | CCAGCAU  |
| ENSG00000102678 | CCAGGAG  |
| ENSG00000102678 | CCCACCG  |
| ENSG00000102678 | GCAGAAG  |
| ENSG00000102678 | GGCAGCG  |
| ENSG00000102678 | UGUCUUU  |
| ENSG00000102678 | UUAUGCA  |
| ENSG00000102678 | UUGGCAC  |
| ENSG00000102743 | GGAAGAC  |
| ENSG00000102753 | AAAAGUA  |
| ENSG00000102753 | AAAGAGC  |
| ENSG00000102753 | AAGUGCA  |
| ENSG00000102753 | ACAGUAC  |
| ENSG00000102753 | ACAGUAU  |
| ENSG00000102753 | AGCAGCA  |
| ENSG00000102753 | AGCAGCG  |
| ENSG00000102753 | AUCAUAC  |
| ENSG00000102753 | AUCCCUU  |
| ENSG00000102753 | AUGUGCC  |
| ENSG00000102753 | CAGCAGG  |
| ENSG00000102753 | CAGGAAC  |
| ENSG00000102753 | CAGUUAC  |
| ENSG00000102753 | GAGAAAU  |
| ENSG00000102753 | GAGUUGA  |
| ENSG00000102753 | GCAGCAU  |
| ENSG00000102753 | GGCUCAG  |
| ENSG00000102753 | GGUGGUU  |
| ENSG00000102753 | GGUGGUU  |
| ENSG00000102753 | UAAGACG  |
| ENSG00000102753 | UACAGUU  |
| ENSG00000102753 | UAUAAAG  |
| ENSG00000102753 | UCACAUU  |
| ENSG00000102753 | UGAUCCA  |
| ENSG00000102753 | UGCAAAG  |
| ENSG00000102753 | UGCAGCU  |
| ENSG00000102753 | UGCAUUAU |
| ENSG00000102753 | UUGGCAC  |
| ENSG00000102755 | ACAUUCA  |
| ENSG00000102755 | AGCAGCU  |

|                 |          |
|-----------------|----------|
| ENSG00000102755 | AUAAUAC  |
| ENSG00000102760 | AUAUAAC  |
| ENSG00000102760 | UACAAAG  |
| ENSG00000102763 | AAUUAAU  |
| ENSG00000102780 | AGCACCA  |
| ENSG00000102781 | GAGGUAU  |
| ENSG00000102781 | GAUCAGA  |
| ENSG00000102781 | GGUAGAC  |
| ENSG00000102781 | UGCAAAG  |
| ENSG00000102786 | AACAGUC  |
| ENSG00000102786 | AAGGCAC  |
| ENSG00000102786 | AAUACUG  |
| ENSG00000102786 | AGUGAUC  |
| ENSG00000102786 | AUACAAG  |
| ENSG00000102786 | AUGUGCC  |
| ENSG00000102786 | CACUGUU  |
| ENSG00000102786 | GGAUUUU  |
| ENSG00000102786 | GGUUUAC  |
| ENSG00000102786 | GUAUGUU  |
| ENSG00000102786 | GUGCUUG  |
| ENSG00000102786 | UGAGAAU  |
| ENSG00000102786 | UGGCCAC  |
| ENSG00000102786 | UGUAUGU  |
| ENSG00000102786 | UUGACAC  |
| ENSG00000102786 | UUGGCAC  |
| ENSG00000102786 | UUUUUGC  |
| ENSG00000102796 | GAGCUGC  |
| ENSG00000102796 | GGAUUUC  |
| ENSG00000102804 | AAGUGCA  |
| ENSG00000102804 | CUAUACA  |
| ENSG00000102804 | UGAAAGG  |
| ENSG00000102805 | CUGCAGC  |
| ENSG00000102858 | AAAGCUG  |
| ENSG00000102858 | ACAGUAC  |
| ENSG00000102858 | ACAGUAU  |
| ENSG00000102858 | GCUGUCU  |
| ENSG00000102858 | GGGUCC   |
| ENSG00000102858 | UAUUACC  |
| ENSG00000102870 | AACACUG  |
| ENSG00000102870 | ACUCAA   |
| ENSG00000102870 | AGCAGCG  |
| ENSG00000102870 | CACUGUU  |
| ENSG00000102870 | CCAGUGC  |
| ENSG00000102870 | CUCUGGG  |
| ENSG00000102870 | CUUUGGU  |
| ENSG00000102870 | GAGACCU  |
| ENSG00000102870 | GCUACAU  |
| ENSG00000102870 | UAUGGUU  |
| ENSG00000102870 | UCCCUUG  |
| ENSG00000102870 | UGAGAAU  |
| ENSG00000102870 | UUGGAGG  |
| ENSG00000102878 | GGAAGCC  |
| ENSG00000102882 | AACAGUC  |
| ENSG00000102882 | AGCCCUU  |
| ENSG00000102882 | AGGCAGG  |
| ENSG00000102882 | AUAUUUAU |
| ENSG00000102882 | CUCAGGG  |
| ENSG00000102882 | GGAAUGU  |
| ENSG00000102882 | UUCUAAU  |
| ENSG00000102893 | AUGUAAU  |
| ENSG00000102893 | GUAACAG  |
| ENSG00000102893 | UGCAUAG  |
| ENSG00000102897 | CUGGAAA  |
| ENSG00000102908 | AAAUCCC  |

|                 |         |
|-----------------|---------|
| ENSG00000102908 | AAGACAU |
| ENSG00000102908 | AAGGUGC |
| ENSG00000102908 | AAGUGCA |
| ENSG00000102908 | ACCACAG |
| ENSG00000102908 | ACCCUGU |
| ENSG00000102908 | ACUGGAU |
| ENSG00000102908 | ACUGUUU |
| ENSG00000102908 | AGCACCA |
| ENSG00000102908 | AGCCAGU |
| ENSG00000102908 | AGCUGCC |
| ENSG00000102908 | AGUGGUU |
| ENSG00000102908 | AUUCAUU |
| ENSG00000102908 | AUUGCAC |
| ENSG00000102908 | CAAAACU |
| ENSG00000102908 | CACAGUG |
| ENSG00000102908 | CAGACAG |
| ENSG00000102908 | CAGCAA  |
| ENSG00000102908 | CCUGUAC |
| ENSG00000102908 | CCUUCUG |
| ENSG00000102908 | CCUUCUU |
| ENSG00000102908 | CUACAGU |
| ENSG00000102908 | CUCAGGG |
| ENSG00000102908 | CUGCAGC |
| ENSG00000102908 | CUGCAGG |
| ENSG00000102908 | CUGGAAA |
| ENSG00000102908 | CUGGCUC |
| ENSG00000102908 | GAGAAGA |
| ENSG00000102908 | GAGUGUG |
| ENSG00000102908 | GAUCAGA |
| ENSG00000102908 | GCAUCC  |
| ENSG00000102908 | GCCUGAU |
| ENSG00000102908 | GCUACAU |
| ENSG00000102908 | GCUGGUG |
| ENSG00000102908 | GGAGUGU |
| ENSG00000102908 | GGCAAGA |
| ENSG00000102908 | GGCAUUG |
| ENSG00000102908 | GGCUCAG |
| ENSG00000102908 | GGGAACG |
| ENSG00000102908 | GGGUUUA |
| ENSG00000102908 | GGUAGAC |
| ENSG00000102908 | GGUCUAG |
| ENSG00000102908 | GGUUGAC |
| ENSG00000102908 | GUAUUCU |
| ENSG00000102908 | GUCCAGA |
| ENSG00000102908 | GUUCAUG |
| ENSG00000102908 | UAAUGCU |
| ENSG00000102908 | UACAGUU |
| ENSG00000102908 | UAUCAGA |
| ENSG00000102908 | UCACAGU |
| ENSG00000102908 | UCCCUUG |
| ENSG00000102908 | UCCCUUU |
| ENSG00000102908 | UGAACGG |
| ENSG00000102908 | UGACCUA |
| ENSG00000102908 | UGACUGU |
| ENSG00000102908 | UGAGAAG |
| ENSG00000102908 | UGCAGCU |
| ENSG00000102908 | UGGCCAC |
| ENSG00000102908 | UUAUGCA |
| ENSG00000102908 | UUCAAGC |
| ENSG00000102908 | UUCCAUA |
| ENSG00000102908 | UUCUUGU |
| ENSG00000102908 | UUGAUCA |
| ENSG00000102908 | UUGGUCC |
| ENSG00000102908 | UUGGUUC |



|                 |          |
|-----------------|----------|
| ENSG00000102908 | UUUGCAA  |
| ENSG00000102908 | UUUGCAC  |
| ENSG00000102921 | AAGUGCA  |
| ENSG00000102921 | ACCAGCA  |
| ENSG00000102921 | AGCAGCG  |
| ENSG00000102921 | AGCAGCU  |
| ENSG00000102921 | AGCCCUU  |
| ENSG00000102921 | AGCCUGC  |
| ENSG00000102921 | AGGAGCU  |
| ENSG00000102921 | AGUGCAA  |
| ENSG00000102921 | CAAGAGC  |
| ENSG00000102921 | CACAGUG  |
| ENSG00000102921 | CUUCACC  |
| ENSG00000102921 | GAAAACA  |
| ENSG00000102921 | GUCUUGC  |
| ENSG00000102921 | GUGACUG  |
| ENSG00000102921 | UAAUGCU  |
| ENSG00000102921 | UCACAGU  |
| ENSG00000102921 | UGAGAAU  |
| ENSG00000102921 | UGUGCUU  |
| ENSG00000102921 | UUGGCAA  |
| ENSG00000102921 | UUGGCAC  |
| ENSG00000102931 | AAAAGUA  |
| ENSG00000102931 | GAGUAUU  |
| ENSG00000102931 | UAUAAUA  |
| ENSG00000102934 | AGUGCUG  |
| ENSG00000102934 | AGUGCUU  |
| ENSG00000102935 | AAUACUG  |
| ENSG00000102935 | AAUCUCA  |
| ENSG00000102935 | AAUGUUG  |
| ENSG00000102935 | ACAUCAC  |
| ENSG00000102935 | AGCAGCA  |
| ENSG00000102935 | AGCAGCU  |
| ENSG00000102935 | AUGACAC  |
| ENSG00000102935 | AUGUAAU  |
| ENSG00000102935 | CAAUUGC  |
| ENSG00000102935 | GAUUGGU  |
| ENSG00000102935 | GCAGGAC  |
| ENSG00000102935 | UAAUAUC  |
| ENSG00000102935 | UCACAUU  |
| ENSG00000102935 | UCAUUUG  |
| ENSG00000102935 | UCCAGUU  |
| ENSG00000102935 | UCCCUUG  |
| ENSG00000102935 | UGCAAAG  |
| ENSG00000102935 | UUCAAAU  |
| ENSG00000102962 | AGCUUUAU |
| ENSG00000102962 | AUAAUAC  |
| ENSG00000102962 | CUGCAGC  |
| ENSG00000102962 | GGAGGAG  |
| ENSG00000102962 | GGGGAGC  |
| ENSG00000102962 | GUCUCUG  |
| ENSG00000102962 | GUGACAG  |
| ENSG00000102962 | GUGGGGA  |
| ENSG00000102962 | UAUAAUA  |
| ENSG00000102962 | UUGGAGG  |
| ENSG00000102967 | AAAGAAU  |
| ENSG00000102967 | UCCUUGC  |
| ENSG00000102974 | ACAGUAC  |
| ENSG00000102974 | AGUGGUU  |
| ENSG00000102974 | GGUUUAC  |
| ENSG00000102974 | GUAUGUU  |
| ENSG00000102974 | UCACACA  |
| ENSG00000102974 | UCUGGAG  |
| ENSG00000102974 | UGACCUA  |

|                 |         |
|-----------------|---------|
| ENSG00000102978 | UAUUGCU |
| ENSG00000102978 | UGUGCUU |
| ENSG00000102984 | AGAUAAA |
| ENSG00000102996 | ACAGUAC |
| ENSG00000102996 | ACAGUAU |
| ENSG00000102996 | CUGGCUC |
| ENSG00000102996 | CUUUGGU |
| ENSG00000102996 | UCCCACA |
| ENSG00000102996 | UCCCACC |
| ENSG00000102996 | UUGGUCC |
| ENSG00000103005 | AAAACUG |
| ENSG00000103005 | GGUGGGC |
| ENSG00000103005 | UUGGAGG |
| ENSG00000103018 | ACUGUGU |
| ENSG00000103018 | CACUGUU |
| ENSG00000103018 | GGAUUUU |
| ENSG00000103018 | GGCUCUG |
| ENSG00000103021 | GAAGGUC |
| ENSG00000103034 | AAAAGUA |
| ENSG00000103034 | ACAGUAC |
| ENSG00000103034 | ACAGUAU |
| ENSG00000103034 | ACCAGCA |
| ENSG00000103034 | AUGGCUU |
| ENSG00000103034 | GGCUCAG |
| ENSG00000103034 | GUGCUUG |
| ENSG00000103034 | UCACAUU |
| ENSG00000103034 | UGUGCUU |
| ENSG00000103035 | AAGAACC |
| ENSG00000103035 | CCUGAG  |
| ENSG00000103035 | GAAGGUC |
| ENSG00000103035 | GUAAACA |
| ENSG00000103035 | UACAAAG |
| ENSG00000103042 | CUUCACC |
| ENSG00000103042 | GUCCAGA |
| ENSG00000103042 | UCCAGAG |
| ENSG00000103043 | AAAGAGG |
| ENSG00000103044 | AAAAAUC |
| ENSG00000103044 | AAAGAGG |
| ENSG00000103044 | ACCCAUI |
| ENSG00000103044 | ACCCUGU |
| ENSG00000103044 | AGCCCUU |
| ENSG00000103044 | AGUGCUU |
| ENSG00000103044 | AUAAAGU |
| ENSG00000103044 | CCCACCG |
| ENSG00000103044 | CCCACCU |
| ENSG00000103044 | CCCUGUU |
| ENSG00000103044 | CUCCCAC |
| ENSG00000103044 | GACCCUG |
| ENSG00000103044 | GAUUGUC |
| ENSG00000103044 | GCACCAU |
| ENSG00000103044 | GCCCUUA |
| ENSG00000103044 | GGAUUUC |
| ENSG00000103044 | GGCUCAG |
| ENSG00000103044 | UACAAAG |
| ENSG00000103044 | UAUAAAG |
| ENSG00000103044 | UAUUGCU |
| ENSG00000103044 | UCCCACC |
| ENSG00000103044 | UCCCUCU |
| ENSG00000103044 | UCCCUUU |
| ENSG00000103044 | UGAGAAU |
| ENSG00000103044 | UUGACAC |
| ENSG00000103044 | UUGGUUC |
| ENSG00000103047 | CCUGCUG |
| ENSG00000103047 | UGCCAGC |

|                 |          |
|-----------------|----------|
| ENSG00000103056 | AAAACUG  |
| ENSG00000103056 | AAAGAAU  |
| ENSG00000103056 | AAGGCAC  |
| ENSG00000103056 | ACAAUUAU |
| ENSG00000103056 | AGCACCA  |
| ENSG00000103056 | AUGGCAC  |
| ENSG00000103056 | CACAGUG  |
| ENSG00000103056 | CAGCAA   |
| ENSG00000103056 | CAGCAGA  |
| ENSG00000103056 | CUUUGGU  |
| ENSG00000103056 | GAUUGUA  |
| ENSG00000103056 | GAUUGUC  |
| ENSG00000103056 | GGCAGCG  |
| ENSG00000103056 | GUGCUUG  |
| ENSG00000103056 | UAAUAUC  |
| ENSG00000103056 | UACAAAG  |
| ENSG00000103056 | UAUCAGA  |
| ENSG00000103056 | UCACAGU  |
| ENSG00000103056 | UCCUGAG  |
| ENSG00000103056 | UGGCUGC  |
| ENSG00000103056 | UGGGUGA  |
| ENSG00000103056 | UUCUAAU  |
| ENSG00000103061 | UCACAUU  |
| ENSG00000103064 | AAAGGUA  |
| ENSG00000103064 | ACUGCAG  |
| ENSG00000103064 | AGCACCA  |
| ENSG00000103064 | AGCAGCU  |
| ENSG00000103064 | CACAGGG  |
| ENSG00000103064 | CAGACAG  |
| ENSG00000103064 | CCCACCU  |
| ENSG00000103064 | CCUGAG   |
| ENSG00000103064 | CCUUCAU  |
| ENSG00000103064 | CUGACUC  |
| ENSG00000103064 | GAGCCCU  |
| ENSG00000103064 | GGAAUGU  |
| ENSG00000103064 | GGCAGUG  |
| ENSG00000103064 | GGCUCAG  |
| ENSG00000103064 | GGCUCUG  |
| ENSG00000103064 | GUAAACA  |
| ENSG00000103064 | GUGAGGU  |
| ENSG00000103064 | UCAAGUA  |
| ENSG00000103064 | UCCUGAG  |
| ENSG00000103064 | UGACAUC  |
| ENSG00000103064 | UGCCAGC  |
| ENSG00000103089 | AUACAAG  |
| ENSG00000103089 | UAUAAAAG |
| ENSG00000103089 | UUCAAAU  |
| ENSG00000103089 | UUUCAAC  |
| ENSG00000103091 | AAUUUUA  |
| ENSG00000103111 | AGCAGCA  |
| ENSG00000103111 | GCAGGUU  |
| ENSG00000103126 | AAGGCAC  |
| ENSG00000103126 | CACAGUG  |
| ENSG00000103126 | GAGAAAU  |
| ENSG00000103126 | GGCAGGG  |
| ENSG00000103126 | UAUUGCU  |
| ENSG00000103126 | UCACACA  |
| ENSG00000103150 | AACAAAC  |
| ENSG00000103160 | AAAGUUU  |
| ENSG00000103160 | AAUCACU  |
| ENSG00000103160 | AUAAAAGU |
| ENSG00000103160 | AUCACUA  |
| ENSG00000103160 | GAGAAAU  |
| ENSG00000103160 | UCACACA  |

|                 |          |
|-----------------|----------|
| ENSG00000103160 | UUGGCAA  |
| ENSG00000103174 | AGGCAGG  |
| ENSG00000103174 | CAGCAGA  |
| ENSG00000103174 | UCAAGUA  |
| ENSG00000103174 | UUGGCAA  |
| ENSG00000103174 | UUGGCAC  |
| ENSG00000103184 | AAGUCAC  |
| ENSG00000103184 | CCUUCUG  |
| ENSG00000103184 | GAGGUAG  |
| ENSG00000103184 | GAGGUAU  |
| ENSG00000103187 | AAGGCAC  |
| ENSG00000103187 | GCUGGUG  |
| ENSG00000103194 | ACUGUGU  |
| ENSG00000103194 | AUAAAGU  |
| ENSG00000103194 | GACAACU  |
| ENSG00000103194 | GGCGACA  |
| ENSG00000103196 | ACAUCAC  |
| ENSG00000103196 | CAAAGCA  |
| ENSG00000103196 | CAGCAAA  |
| ENSG00000103196 | CCCUGUU  |
| ENSG00000103196 | CUCCAC   |
| ENSG00000103196 | UGUCUGC  |
| ENSG00000103196 | UGUCUGG  |
| ENSG00000103196 | UUCAAAU  |
| ENSG00000103202 | AAGGCAC  |
| ENSG00000103202 | AAUUUUA  |
| ENSG00000103202 | AGGUAGU  |
| ENSG00000103202 | GAGGUAG  |
| ENSG00000103222 | AAGUCAC  |
| ENSG00000103222 | ACUGCAU  |
| ENSG00000103222 | CAGGAAC  |
| ENSG00000103222 | CCAGUGC  |
| ENSG00000103222 | GAGGCAG  |
| ENSG00000103222 | GGAAGAC  |
| ENSG00000103222 | GGCUGCG  |
| ENSG00000103222 | UCCAGUU  |
| ENSG00000103222 | UUGGUCC  |
| ENSG00000103226 | UCUCACC  |
| ENSG00000103241 | AAAGUGC  |
| ENSG00000103241 | AAAGUUU  |
| ENSG00000103241 | ACAGUAC  |
| ENSG00000103241 | ACAGUAU  |
| ENSG00000103241 | AGUGCCU  |
| ENSG00000103241 | AUAU AAC |
| ENSG00000103241 | CAGCAGA  |
| ENSG00000103241 | CAGUAGA  |
| ENSG00000103241 | CAGUGCA  |
| ENSG00000103241 | GUGUCAC  |
| ENSG00000103241 | UAAUACA  |
| ENSG00000103241 | UACAGUU  |
| ENSG00000103248 | CUGGCUC  |
| ENSG00000103254 | GAGUCUU  |
| ENSG00000103257 | CAGUGCA  |
| ENSG00000103257 | CGUACCG  |
| ENSG00000103264 | AAGACAU  |
| ENSG00000103264 | AAGUGCA  |
| ENSG00000103266 | UGCUCAC  |
| ENSG00000103269 | GGCUCAG  |
| ENSG00000103275 | AAAGUUU  |
| ENSG00000103275 | AAUACUG  |
| ENSG00000103275 | ACCCUGU  |
| ENSG00000103275 | AUCCCUU  |
| ENSG00000103275 | GAAGGAA  |
| ENSG00000103275 | GACCCUG  |

|                 |         |
|-----------------|---------|
| ENSG00000103275 | UGAAAUG |
| ENSG00000103319 | AAAACUG |
| ENSG00000103319 | AACCUGU |
| ENSG00000103319 | AGAUAAA |
| ENSG00000103319 | AGCAAAA |
| ENSG00000103319 | AGGUAGU |
| ENSG00000103319 | AUAAAGU |
| ENSG00000103319 | CAAAGCA |
| ENSG00000103319 | CAGUCCA |
| ENSG00000103319 | CUCAAAC |
| ENSG00000103319 | CUCUGGG |
| ENSG00000103319 | GAGGUAG |
| ENSG00000103319 | GGAAUGU |
| ENSG00000103319 | GGCAGUG |
| ENSG00000103319 | UAGAGGA |
| ENSG00000103319 | UGCCUG  |
| ENSG00000103319 | UUGAUCA |
| ENSG00000103319 | UUGGUUC |
| ENSG00000103319 | UUUCAAC |
| ENSG00000103326 | AAAAAUC |
| ENSG00000103326 | AAAGUGC |
| ENSG00000103326 | AUAAAGU |
| ENSG00000103326 | AUGGCUU |
| ENSG00000103326 | GAGGUAU |
| ENSG00000103326 | UCACAGG |
| ENSG00000103326 | UCACAGU |
| ENSG00000103326 | UCCUGAG |
| ENSG00000103326 | UGCAUAG |
| ENSG00000103326 | UGCAUAU |
| ENSG00000103342 | AAAGCUG |
| ENSG00000103342 | ACAGUAU |
| ENSG00000103342 | UCACAGU |
| ENSG00000103351 | AAUCACU |
| ENSG00000103351 | UCCCUUG |
| ENSG00000103353 | AAAGUAC |
| ENSG00000103353 | AAAGUGC |
| ENSG00000103353 | AAAUGGU |
| ENSG00000103353 | AAGUGCA |
| ENSG00000103353 | AAGUGCU |
| ENSG00000103353 | AAUCUCU |
| ENSG00000103353 | ACUGGCU |
| ENSG00000103353 | AGCACCA |
| ENSG00000103353 | AGCAGCA |
| ENSG00000103353 | AGCCUGC |
| ENSG00000103353 | AGGACAC |
| ENSG00000103353 | AGUGCUU |
| ENSG00000103353 | AUGGCAC |
| ENSG00000103353 | AUGUGGG |
| ENSG00000103353 | CAGUCCA |
| ENSG00000103353 | CAGUCUG |
| ENSG00000103353 | CAGUGCA |
| ENSG00000103353 | CCAGCAU |
| ENSG00000103353 | CCUUCAU |
| ENSG00000103353 | CUGCAGG |
| ENSG00000103353 | CUUUGGU |
| ENSG00000103353 | GAAACAU |
| ENSG00000103353 | GAGGUAG |
| ENSG00000103353 | GAGGUAU |
| ENSG00000103353 | GCAACUU |
| ENSG00000103353 | GCACCAU |
| ENSG00000103353 | GCAGAAG |
| ENSG00000103353 | GCUGGAU |
| ENSG00000103353 | GGCCUG  |
| ENSG00000103353 | GUGCAAA |

|                 |          |
|-----------------|----------|
| ENSG00000103353 | UCACAGG  |
| ENSG00000103353 | UCACAGU  |
| ENSG00000103353 | UGCAUAG  |
| ENSG00000103353 | UGCAUUA  |
| ENSG00000103353 | UGGACUG  |
| ENSG00000103353 | UGGCCCU  |
| ENSG00000103353 | UUGGCAC  |
| ENSG00000103353 | UUGGUCC  |
| ENSG00000103353 | UUUGCAA  |
| ENSG00000103353 | UUUGCAC  |
| ENSG00000103356 | GAAGGUC  |
| ENSG00000103365 | AGCAUUC  |
| ENSG00000103365 | AGGCAGG  |
| ENSG00000103365 | CACAGUG  |
| ENSG00000103365 | CUUGGAG  |
| ENSG00000103365 | GAAGGAA  |
| ENSG00000103365 | GCAGAAG  |
| ENSG00000103365 | GGAUGAG  |
| ENSG00000103365 | GGCAGGG  |
| ENSG00000103365 | GGGAGCU  |
| ENSG00000103365 | UCACCAC  |
| ENSG00000103365 | UUGGCAC  |
| ENSG00000103404 | AAGGCGC  |
| ENSG00000103404 | AAGUCUU  |
| ENSG00000103404 | AAUUAUU  |
| ENSG00000103404 | AGCACCA  |
| ENSG00000103404 | AGCAGCA  |
| ENSG00000103404 | AUACCUC  |
| ENSG00000103404 | AUGGCUU  |
| ENSG00000103404 | CAAAGCA  |
| ENSG00000103404 | CAA AUGC |
| ENSG00000103404 | CACAGGG  |
| ENSG00000103404 | CACCACC  |
| ENSG00000103404 | CCAGUGC  |
| ENSG00000103404 | CUGCUCA  |
| ENSG00000103404 | CUUUGGU  |
| ENSG00000103404 | GACUUCC  |
| ENSG00000103404 | GAGAAAU  |
| ENSG00000103404 | GAGUAUU  |
| ENSG00000103404 | GCAGAAG  |
| ENSG00000103404 | GCAGGUU  |
| ENSG00000103404 | GCCCUUA  |
| ENSG00000103404 | GGCAGGG  |
| ENSG00000103404 | GUGCUUG  |
| ENSG00000103404 | UAAUACA  |
| ENSG00000103404 | UAAUGCU  |
| ENSG00000103404 | UCACAAG  |
| ENSG00000103404 | UCACAUU  |
| ENSG00000103404 | UCACCAC  |
| ENSG00000103404 | UGCAGCU  |
| ENSG00000103404 | UGCAUAG  |
| ENSG00000103404 | UGCAUUA  |
| ENSG00000103404 | UGCCUG   |
| ENSG00000103404 | UGUGCUU  |
| ENSG00000103415 | AAGUCAC  |
| ENSG00000103415 | CCAGCAU  |
| ENSG00000103415 | CUGGCUC  |
| ENSG00000103423 | UCAUUUG  |
| ENSG00000103423 | UCCAGUU  |
| ENSG00000103423 | UGCAGCU  |
| ENSG00000103423 | UUUGCAC  |
| ENSG00000103426 | AAAGUUU  |
| ENSG00000103426 | GGCAAGA  |
| ENSG00000103429 | AGCAGCA  |

|                 |          |
|-----------------|----------|
| ENSG00000103429 | CAAAGCA  |
| ENSG00000103429 | UUCCUAG  |
| ENSG00000103449 | AAAGUGC  |
| ENSG00000103449 | AACUCUA  |
| ENSG00000103449 | AAGUGCA  |
| ENSG00000103449 | AAUGCCC  |
| ENSG00000103449 | ACAGUAC  |
| ENSG00000103449 | AGCAGCG  |
| ENSG00000103449 | AGCAGCU  |
| ENSG00000103449 | CAGCAGG  |
| ENSG00000103449 | CUAGUCC  |
| ENSG00000103449 | GCAGCAU  |
| ENSG00000103449 | GGCAUUG  |
| ENSG00000103449 | GUUAAUG  |
| ENSG00000103449 | UAAUGCU  |
| ENSG00000103449 | UACAGUU  |
| ENSG00000103449 | UCAAGUA  |
| ENSG00000103449 | UUAGAGA  |
| ENSG00000103449 | UUUGCAA  |
| ENSG00000103460 | AAAGUAU  |
| ENSG00000103460 | AAGUGCU  |
| ENSG00000103460 | ACAUUAC  |
| ENSG00000103460 | AGAUAAA  |
| ENSG00000103460 | CCAGUGU  |
| ENSG00000103460 | GUGCUUG  |
| ENSG00000103460 | UCAUACA  |
| ENSG00000103460 | UGAAAUG  |
| ENSG00000103460 | UGUGCUU  |
| ENSG00000103460 | UUGGCAC  |
| ENSG00000103479 | AGCAAAA  |
| ENSG00000103479 | AUUGCAC  |
| ENSG00000103479 | CUAGUAA  |
| ENSG00000103489 | AAAACUG  |
| ENSG00000103489 | AAAGUGC  |
| ENSG00000103489 | AAGUCAC  |
| ENSG00000103489 | ACAGGUG  |
| ENSG00000103489 | ACAGUAC  |
| ENSG00000103489 | ACAUUAC  |
| ENSG00000103489 | ACAUUCA  |
| ENSG00000103489 | AGCCCUU  |
| ENSG00000103489 | AUAAAGU  |
| ENSG00000103489 | AUAUUAU  |
| ENSG00000103489 | AUGACAC  |
| ENSG00000103489 | AUGCAUU  |
| ENSG00000103489 | CAA AUGC |
| ENSG00000103489 | CACCACC  |
| ENSG00000103489 | CACUGUU  |
| ENSG00000103489 | CAGCAGA  |
| ENSG00000103489 | CAGCAGG  |
| ENSG00000103489 | CAGUUAC  |
| ENSG00000103489 | CUCUGGG  |
| ENSG00000103489 | CUUCUCU  |
| ENSG00000103489 | CUUUGGU  |
| ENSG00000103489 | GAGCCCU  |
| ENSG00000103489 | GAGGCAG  |
| ENSG00000103489 | GAGGUAG  |
| ENSG00000103489 | GAGGUAU  |
| ENSG00000103489 | GCAGAAG  |
| ENSG00000103489 | GGAGAGA  |
| ENSG00000103489 | GGCUCAG  |
| ENSG00000103489 | GGUAGAC  |
| ENSG00000103489 | GGUUGUC  |
| ENSG00000103489 | GUCACUC  |
| ENSG00000103489 | GUGAAUG  |

|                 |         |
|-----------------|---------|
| ENSG00000103489 | GUGCAA  |
| ENSG00000103489 | GUGCCAC |
| ENSG00000103489 | UACAGUU |
| ENSG00000103489 | UCACAUU |
| ENSG00000103489 | UCACCAC |
| ENSG00000103489 | UGAAAUG |
| ENSG00000103489 | UGCAUAG |
| ENSG00000103489 | UGGCUGC |
| ENSG00000103489 | UUCAAAU |
| ENSG00000103489 | UUGGUCC |
| ENSG00000103489 | UUGUGAC |
| ENSG00000103489 | UUUGCAA |
| ENSG00000103494 | AAAGAGC |
| ENSG00000103494 | AAAUGGU |
| ENSG00000103494 | AACAAAC |
| ENSG00000103494 | AAUCACU |
| ENSG00000103494 | AAUUAUU |
| ENSG00000103494 | AAUUUUA |
| ENSG00000103494 | ACAGUAU |
| ENSG00000103494 | AGCAUUC |
| ENSG00000103494 | AGCCUGC |
| ENSG00000103494 | AGGAGCU |
| ENSG00000103494 | AGGUAGU |
| ENSG00000103494 | AUCCUUU |
| ENSG00000103494 | CACAGUG |
| ENSG00000103494 | CUCCAUU |
| ENSG00000103494 | GAAUUGU |
| ENSG00000103494 | GCAGCAU |
| ENSG00000103494 | UCACAAG |
| ENSG00000103494 | UCACACA |
| ENSG00000103494 | UCACAGG |
| ENSG00000103494 | UGCAAAG |
| ENSG00000103494 | UUUGCAA |
| ENSG00000103494 | UUUUUGC |
| ENSG00000103495 | AGCACCA |
| ENSG00000103495 | CAGACAG |
| ENSG00000103495 | CAGGAAC |
| ENSG00000103495 | CUGCCCC |
| ENSG00000103495 | UCUGGAG |
| ENSG00000103496 | GGCUCUG |
| ENSG00000103496 | UACAAAG |
| ENSG00000103502 | CUGACUC |
| ENSG00000103502 | GGGGAGC |
| ENSG00000103512 | UCUCACC |
| ENSG00000103522 | CUGCAGG |
| ENSG00000103522 | UCUCACC |
| ENSG00000103534 | CACAGGG |
| ENSG00000103549 | CAGGCUC |
| ENSG00000103549 | CCCUGAG |
| ENSG00000103549 | GGAAUGU |
| ENSG00000103550 | AGCACCA |
| ENSG00000103550 | AUGGCUU |
| ENSG00000103550 | CCCUGAG |
| ENSG00000103550 | GAGCUGC |
| ENSG00000103569 | CCAUUAC |
| ENSG00000103569 | GUCCAGA |
| ENSG00000103647 | AAUCACU |
| ENSG00000103647 | CUCUGGG |
| ENSG00000103647 | GCAGCAU |
| ENSG00000103647 | GGAGGCA |
| ENSG00000103647 | GUCUCUG |
| ENSG00000103647 | UGGGUGA |
| ENSG00000103653 | AAAAAUC |
| ENSG00000103653 | AAUGCCC |



|                 |          |
|-----------------|----------|
| ENSG00000103653 | CUUGUAU  |
| ENSG00000103653 | UAUUACC  |
| ENSG00000103653 | UUCUUGU  |
| ENSG00000103657 | AAACUGU  |
| ENSG00000103671 | UAUAAAAG |
| ENSG00000103707 | UCCUUGC  |
| ENSG00000103710 | AGCAGCA  |
| ENSG00000103710 | CUGCAGC  |
| ENSG00000103710 | CUGCAGG  |
| ENSG00000103710 | GCAGCAU  |
| ENSG00000103710 | GUAAACA  |
| ENSG00000103710 | UUCUGCA  |
| ENSG00000103740 | UGAAGCU  |
| ENSG00000103769 | CUAUACA  |
| ENSG00000103769 | GACCUGG  |
| ENSG00000103769 | GCUGGUG  |
| ENSG00000103855 | ACCAGCA  |
| ENSG00000103855 | AGCACCA  |
| ENSG00000103855 | AGCAGCU  |
| ENSG00000103855 | GAGAAAU  |
| ENSG00000103855 | GAGAACC  |
| ENSG00000103855 | GAGGUAU  |
| ENSG00000103855 | GCACCAU  |
| ENSG00000103855 | GUGAGGU  |
| ENSG00000103888 | AAUCUCA  |
| ENSG00000103888 | AGCACCA  |
| ENSG00000103888 | AGUGAUC  |
| ENSG00000103888 | AGUGGUU  |
| ENSG00000103888 | AUAAUAC  |
| ENSG00000103888 | GGUAGAC  |
| ENSG00000103888 | GUCUCUG  |
| ENSG00000103888 | UAUAAUA  |
| ENSG00000103888 | UCACAGG  |
| ENSG00000103888 | UCACAGU  |
| ENSG00000103888 | UGGCCAC  |
| ENSG00000103932 | CUCAAAC  |
| ENSG00000103942 | ACUGCAU  |
| ENSG00000103942 | AGCCCUU  |
| ENSG00000103942 | GCCCUUA  |
| ENSG00000103942 | GGUAGAC  |
| ENSG00000103942 | UAUGGUU  |
| ENSG00000103942 | UCCCACA  |
| ENSG00000103942 | UGCCUG   |
| ENSG00000103966 | CCAGUGU  |
| ENSG00000103966 | GGCAGUG  |
| ENSG00000103978 | AGCAGCA  |
| ENSG00000103978 | AUUGCAC  |
| ENSG00000103978 | UGUGUCA  |
| ENSG00000103994 | AGCUGCC  |
| ENSG00000103994 | GAGCUGC  |
| ENSG00000103994 | GGAGGCA  |
| ENSG00000103994 | UCCCAUA  |
| ENSG00000104043 | CUGCCCC  |
| ENSG00000104043 | GAGGUAG  |
| ENSG00000104043 | GUGCUUG  |
| ENSG00000104043 | UACAAAG  |
| ENSG00000104067 | AAGGCAC  |
| ENSG00000104067 | AAUACUG  |
| ENSG00000104067 | AUGUGCC  |
| ENSG00000104067 | GCUGGUG  |
| ENSG00000104067 | GGGUAAG  |
| ENSG00000104067 | GUGCCAC  |
| ENSG00000104067 | UAUUGCU  |
| ENSG00000104067 | UGCAUAG  |

|                 |         |
|-----------------|---------|
| ENSG00000104081 | AAAAAUC |
| ENSG00000104081 | AAGGCAC |
| ENSG00000104081 | ACAUUCA |
| ENSG00000104081 | CAGCAGG |
| ENSG00000104081 | CCUGCUG |
| ENSG00000104081 | CUCAGGG |
| ENSG00000104081 | GAGCCCC |
| ENSG00000104081 | GAGCCCU |
| ENSG00000104081 | GAGGCAG |
| ENSG00000104081 | GAGGGGC |
| ENSG00000104081 | GGAGAGA |
| ENSG00000104081 | GGCUCAG |
| ENSG00000104081 | GGGUCUU |
| ENSG00000104081 | UCCAGAG |
| ENSG00000104081 | UCCUGAG |
| ENSG00000104081 | UGAGAAU |
| ENSG00000104081 | UGCCCUG |
| ENSG00000104081 | UUGACAC |
| ENSG00000104093 | UGCAUAG |
| ENSG00000104093 | UGGCCAC |
| ENSG00000104112 | AUGUCUG |
| ENSG00000104131 | AGCAUUC |
| ENSG00000104131 | UUGGCAA |
| ENSG00000104131 | UUGGCAC |
| ENSG00000104133 | UUCUAAU |
| ENSG00000104142 | UAAUGCU |
| ENSG00000104154 | AAGGCAC |
| ENSG00000104154 | ACUGCAG |
| ENSG00000104154 | CUGCAGG |
| ENSG00000104154 | GAGGUAG |
| ENSG00000104154 | GAUUGUC |
| ENSG00000104154 | GGAAGAC |
| ENSG00000104154 | GGUUUAC |
| ENSG00000104154 | UACAAAG |
| ENSG00000104154 | UGUCUUU |
| ENSG00000104164 | AGGUAGU |
| ENSG00000104164 | GAGGUAG |
| ENSG00000104164 | GAUAUGU |
| ENSG00000104164 | GAUCAGA |
| ENSG00000104164 | GCCUGAU |
| ENSG00000104177 | AUUCAUU |
| ENSG00000104177 | GGAAUGU |
| ENSG00000104205 | AAGUCUU |
| ENSG00000104205 | AAUGCCC |
| ENSG00000104205 | CAGUAGU |
| ENSG00000104205 | CAGUCCA |
| ENSG00000104205 | CUUUGGU |
| ENSG00000104205 | GAAACAU |
| ENSG00000104205 | GAGGCAG |
| ENSG00000104205 | GCAGAAG |
| ENSG00000104205 | GUAAACA |
| ENSG00000104205 | UAUUACC |
| ENSG00000104205 | UGCAAAG |
| ENSG00000104205 | UGCAUUA |
| ENSG00000104205 | UUGGCAA |
| ENSG00000104205 | UUGGCAC |
| ENSG00000104205 | UUUGCAA |
| ENSG00000104218 | AAGGCAC |
| ENSG00000104219 | AAGGCAC |
| ENSG00000104219 | ACAAGGU |
| ENSG00000104219 | AGUGCAA |
| ENSG00000104219 | AUACAAG |
| ENSG00000104219 | GAGAUGA |
| ENSG00000104219 | GAUUGUC |

|                 |          |
|-----------------|----------|
| ENSG00000104219 | GCUGGAU  |
| ENSG00000104219 | UGUGCUU  |
| ENSG00000104221 | ACAAUUAU |
| ENSG00000104221 | AUACAAG  |
| ENSG00000104221 | AUAUUUAU |
| ENSG00000104221 | UAAUAUC  |
| ENSG00000104290 | AAAAAUC  |
| ENSG00000104290 | AAAAGUA  |
| ENSG00000104290 | AAAGCUG  |
| ENSG00000104290 | UUCUAAU  |
| ENSG00000104290 | UUGGCAA  |
| ENSG00000104299 | ACUGUAG  |
| ENSG00000104313 | AAAGUGC  |
| ENSG00000104313 | AACAUUC  |
| ENSG00000104313 | AAGGCAC  |
| ENSG00000104313 | ACAAUUAU |
| ENSG00000104313 | AGCAGCG  |
| ENSG00000104313 | AGCAGCU  |
| ENSG00000104313 | AUGUAAU  |
| ENSG00000104313 | CAAAGUG  |
| ENSG00000104313 | UACAAAG  |
| ENSG00000104313 | UAUUACC  |
| ENSG00000104313 | UGACAUC  |
| ENSG00000104313 | UUGGUCC  |
| ENSG00000104321 | CAGGAAC  |
| ENSG00000104321 | UGACAUC  |
| ENSG00000104327 | ACAGUAU  |
| ENSG00000104327 | ACUGGCC  |
| ENSG00000104327 | AGUGCAA  |
| ENSG00000104327 | AUCACUA  |
| ENSG00000104327 | UGGAUAA  |
| ENSG00000104331 | AAAUGGU  |
| ENSG00000104331 | AAGUCUU  |
| ENSG00000104331 | AAUGCCC  |
| ENSG00000104331 | AGGUAGU  |
| ENSG00000104331 | AUGACAC  |
| ENSG00000104331 | CUCAAAC  |
| ENSG00000104331 | CUUUGGU  |
| ENSG00000104331 | GUGCUUG  |
| ENSG00000104331 | UCACAAG  |
| ENSG00000104331 | UCUUGAG  |
| ENSG00000104331 | UUAUGCA  |
| ENSG00000104331 | UCCAUA   |
| ENSG00000104331 | UUCUUGU  |
| ENSG00000104332 | ACAGUAU  |
| ENSG00000104332 | CAAAACU  |
| ENSG00000104332 | CAAAGCA  |
| ENSG00000104332 | CACAGUG  |
| ENSG00000104332 | UCACAUU  |
| ENSG00000104332 | UGAAAUG  |
| ENSG00000104341 | AAUUGCU  |
| ENSG00000104343 | AAAGAAU  |
| ENSG00000104343 | AAAGUGC  |
| ENSG00000104343 | AAGGCAC  |
| ENSG00000104343 | ACAUUCA  |
| ENSG00000104343 | ACCUGGA  |
| ENSG00000104343 | ACUGUAG  |
| ENSG00000104343 | AGUGCAA  |
| ENSG00000104343 | AUACAAG  |
| ENSG00000104343 | CAAAACU  |
| ENSG00000104343 | CAGUAGU  |
| ENSG00000104343 | CAGUGCA  |
| ENSG00000104343 | CCCUGAG  |
| ENSG00000104343 | CUAUACA  |

|                 |          |
|-----------------|----------|
| ENSG00000104343 | CUGCAGC  |
| ENSG00000104343 | CUGGACU  |
| ENSG00000104343 | GACCUGG  |
| ENSG00000104343 | GCAGCAU  |
| ENSG00000104343 | GCUAGCA  |
| ENSG00000104343 | GGCAGGG  |
| ENSG00000104343 | GGGGUGC  |
| ENSG00000104343 | GGGGUGG  |
| ENSG00000104343 | GUCAGUU  |
| ENSG00000104343 | UAAUACA  |
| ENSG00000104343 | UAUAAAAG |
| ENSG00000104343 | UAUUGCU  |
| ENSG00000104343 | UCACAGU  |
| ENSG00000104343 | UCACCAC  |
| ENSG00000104343 | UCAUACA  |
| ENSG00000104343 | UCAUAGA  |
| ENSG00000104343 | UCCAGUU  |
| ENSG00000104343 | UUUGCAA  |
| ENSG00000104343 | UUUGCAC  |
| ENSG00000104365 | AGCAGCG  |
| ENSG00000104365 | AGCAGCU  |
| ENSG00000104365 | AUAAUAC  |
| ENSG00000104365 | CCAGUGC  |
| ENSG00000104365 | CCAGUGU  |
| ENSG00000104369 | AAACUGU  |
| ENSG00000104369 | AAGGCAC  |
| ENSG00000104369 | UAAGACU  |
| ENSG00000104369 | UACAGUU  |
| ENSG00000104375 | CCUUCAU  |
| ENSG00000104375 | UUGGUUC  |
| ENSG00000104381 | AAAGCUG  |
| ENSG00000104381 | GGAGGCA  |
| ENSG00000104381 | UAGGUAU  |
| ENSG00000104381 | UCUGGAG  |
| ENSG00000104381 | UGAAAUG  |
| ENSG00000104381 | UUCCUAG  |
| ENSG00000104388 | UGUCUUU  |
| ENSG00000104408 | AAUUUUA  |
| ENSG00000104415 | AGCAGCA  |
| ENSG00000104419 | CUUUGGU  |
| ENSG00000104419 | GGCAGGG  |
| ENSG00000104419 | UAAUACA  |
| ENSG00000104419 | UACAAAG  |
| ENSG00000104419 | UGCAAAG  |
| ENSG00000104419 | UUGGCAA  |
| ENSG00000104419 | UUGGCAC  |
| ENSG00000104419 | UUGGUCC  |
| ENSG00000104432 | AAAGUAA  |
| ENSG00000104432 | ACUGUGU  |
| ENSG00000104432 | UUGGAGG  |
| ENSG00000104435 | UCAUACA  |
| ENSG00000104442 | AAAACUG  |
| ENSG00000104442 | AAGGCAC  |
| ENSG00000104442 | ACUGGCC  |
| ENSG00000104442 | CACCACC  |
| ENSG00000104442 | GAGGCAG  |
| ENSG00000104442 | UAUUGCU  |
| ENSG00000104442 | UCACACA  |
| ENSG00000104442 | UCCUGAG  |
| ENSG00000104442 | UGCAAAG  |
| ENSG00000104442 | UGUGCGU  |
| ENSG00000104442 | UUGGCAA  |
| ENSG00000104442 | UUGGUUC  |
| ENSG00000104447 | AAAACUG  |

|                 |         |
|-----------------|---------|
| ENSG00000104447 | AAAGAGG |
| ENSG00000104447 | AAAGUAC |
| ENSG00000104447 | AAAGUGC |
| ENSG00000104447 | AACAUUC |
| ENSG00000104447 | AACUACU |
| ENSG00000104447 | AAGGCAC |
| ENSG00000104447 | AAGUAGC |
| ENSG00000104447 | AAGUGCA |
| ENSG00000104447 | AAUGUUG |
| ENSG00000104447 | ACAAUAU |
| ENSG00000104447 | ACACACU |
| ENSG00000104447 | ACCACAG |
| ENSG00000104447 | ACUAGAU |
| ENSG00000104447 | ACUGCAG |
| ENSG00000104447 | ACUGCAU |
| ENSG00000104447 | ACUGUAG |
| ENSG00000104447 | AGAUGUG |
| ENSG00000104447 | AGCCCUU |
| ENSG00000104447 | AGGAGCU |
| ENSG00000104447 | AGGCAGG |
| ENSG00000104447 | AGUGCAA |
| ENSG00000104447 | AGUGCUU |
| ENSG00000104447 | AUCACUA |
| ENSG00000104447 | AUCCUUG |
| ENSG00000104447 | AUGUAAU |
| ENSG00000104447 | AUGUGCC |
| ENSG00000104447 | CAAAGUG |
| ENSG00000104447 | CAGCAGG |
| ENSG00000104447 | CAGGCUC |
| ENSG00000104447 | CAGUCUG |
| ENSG00000104447 | CAGUGCA |
| ENSG00000104447 | CAGUUAC |
| ENSG00000104447 | CAUGGAU |
| ENSG00000104447 | CCCUGAG |
| ENSG00000104447 | CCUUCAU |
| ENSG00000104447 | CCUUCUG |
| ENSG00000104447 | CCUUCUU |
| ENSG00000104447 | CUACAAA |
| ENSG00000104447 | CUCCCAA |
| ENSG00000104447 | CUCCCAC |
| ENSG00000104447 | CUGACUC |
| ENSG00000104447 | GAGAUGA |
| ENSG00000104447 | GAGGAUA |
| ENSG00000104447 | GAUCAGA |
| ENSG00000104447 | GCACCAU |
| ENSG00000104447 | GCAGGUU |
| ENSG00000104447 | GCAUCCC |
| ENSG00000104447 | GCCUGAU |
| ENSG00000104447 | GCUACAU |
| ENSG00000104447 | GGAAUGU |
| ENSG00000104447 | GGCAUUG |
| ENSG00000104447 | GGUGGUC |
| ENSG00000104447 | GGUGGUU |
| ENSG00000104447 | GGUUACC |
| ENSG00000104447 | GUAAACA |
| ENSG00000104447 | GUCAACA |
| ENSG00000104447 | GUGCAAA |
| ENSG00000104447 | UAUUACC |
| ENSG00000104447 | UAUUGCU |
| ENSG00000104447 | UCAAGUA |
| ENSG00000104447 | UCAUUCG |
| ENSG00000104447 | UCCCUGU |
| ENSG00000104447 | UCCCUUG |
| ENSG00000104447 | UCCCUUU |

|                 |         |
|-----------------|---------|
| ENSG00000104447 | UCCUAUA |
| ENSG00000104447 | UGCAAAG |
| ENSG00000104447 | UGCAUAG |
| ENSG00000104447 | UGCAUAU |
| ENSG00000104447 | UGCAUUG |
| ENSG00000104447 | UGUGCUU |
| ENSG00000104447 | UUCCUAG |
| ENSG00000104447 | UUCUGCA |
| ENSG00000104447 | UUCUUGU |
| ENSG00000104447 | UUGAGGC |
| ENSG00000104447 | UUGGAGG |
| ENSG00000104447 | UUGUGAC |
| ENSG00000104447 | UUGUUCG |
| ENSG00000104447 | UUUGCAA |
| ENSG00000104447 | UUUUUGC |
| ENSG00000104472 | GCUGUCU |
| ENSG00000104490 | AACAGUC |
| ENSG00000104490 | AUUCAUU |
| ENSG00000104490 | CACAAUG |
| ENSG00000104490 | GAUUGUA |
| ENSG00000104490 | GGCUCAG |
| ENSG00000104490 | GUAAACA |
| ENSG00000104490 | GUGCAA  |
| ENSG00000104490 | UCACAGU |
| ENSG00000104490 | UCCAGUU |
| ENSG00000104490 | UGCAAAG |
| ENSG00000104490 | UGCUCAC |
| ENSG00000104490 | UCCUCG  |
| ENSG00000104490 | UUGGCAC |
| ENSG00000104497 | AAGUGCA |
| ENSG00000104497 | GAGGUAG |
| ENSG00000104517 | AAGAACC |
| ENSG00000104517 | ACACACU |
| ENSG00000104517 | AGAUAAA |
| ENSG00000104517 | AGUAGUU |
| ENSG00000104517 | CUUUGGU |
| ENSG00000104517 | GCUGUCU |
| ENSG00000104517 | GGAAUGU |
| ENSG00000104517 | UCACAGU |
| ENSG00000104517 | UCAUGAU |
| ENSG00000104517 | UGCUCAC |
| ENSG00000104517 | UGGCUGC |
| ENSG00000104522 | CCCUGAG |
| ENSG00000104522 | UCCUGU  |
| ENSG00000104522 | UGAGGAC |
| ENSG00000104613 | AAAAAUC |
| ENSG00000104635 | AAAACUG |
| ENSG00000104635 | AACCUGG |
| ENSG00000104635 | AACUCUA |
| ENSG00000104635 | AAUACUG |
| ENSG00000104635 | ACCUGGA |
| ENSG00000104635 | ACUGUGU |
| ENSG00000104635 | CAGCAA  |
| ENSG00000104635 | CUUACAG |
| ENSG00000104635 | UUGGUUC |
| ENSG00000104643 | AAGAACC |
| ENSG00000104643 | ACAUUCA |
| ENSG00000104643 | CCAGUGC |
| ENSG00000104643 | CCUGUAC |
| ENSG00000104643 | CUCUGGG |
| ENSG00000104643 | CUGGCUC |
| ENSG00000104643 | GAGGUAU |
| ENSG00000104643 | GUCUACU |
| ENSG00000104643 | UAAUAGU |

|                 |          |
|-----------------|----------|
| ENSG00000104643 | UCACAUU  |
| ENSG00000104643 | UCUCCAA  |
| ENSG00000104643 | UGAGAAG  |
| ENSG00000104695 | AACAGUC  |
| ENSG00000104695 | CAGCAGG  |
| ENSG00000104722 | AAAGUAA  |
| ENSG00000104722 | GAGAACC  |
| ENSG00000104722 | GAGGUAG  |
| ENSG00000104722 | GAGGUAU  |
| ENSG00000104722 | GCACCAU  |
| ENSG00000104722 | GUAAACA  |
| ENSG00000104722 | GUGAGGU  |
| ENSG00000104722 | UCUGGAG  |
| ENSG00000104722 | UGUCUGG  |
| ENSG00000104723 | AAAUCCC  |
| ENSG00000104723 | GUAAACA  |
| ENSG00000104725 | AUGAGCU  |
| ENSG00000104725 | GGCAGCG  |
| ENSG00000104725 | UAUUGCU  |
| ENSG00000104725 | UCUGGAA  |
| ENSG00000104728 | AACAGUC  |
| ENSG00000104728 | AGCACCA  |
| ENSG00000104728 | AGCAGCU  |
| ENSG00000104728 | AGUGCUG  |
| ENSG00000104756 | AAAGCUG  |
| ENSG00000104756 | ACAAUUAU |
| ENSG00000104756 | CUUACAG  |
| ENSG00000104756 | CUUCUCU  |
| ENSG00000104756 | GUGACAG  |
| ENSG00000104756 | GUGCUUG  |
| ENSG00000104756 | UGAAAUG  |
| ENSG00000104756 | UGCAUAG  |
| ENSG00000104756 | UUCUGCA  |
| ENSG00000104756 | UUGGUUC  |
| ENSG00000104765 | AGCCCUU  |
| ENSG00000104765 | AUGGCAC  |
| ENSG00000104765 | CAAAGUG  |
| ENSG00000104783 | UAUUACC  |
| ENSG00000104808 | UGUCUUU  |
| ENSG00000104812 | AAGGCAC  |
| ENSG00000104812 | ACACACU  |
| ENSG00000104814 | GGGGUGC  |
| ENSG00000104826 | UGAGAAG  |
| ENSG00000104853 | AAAUCCC  |
| ENSG00000104853 | CUUCACC  |
| ENSG00000104853 | GGCAGGG  |
| ENSG00000104853 | GUCCAGA  |
| ENSG00000104856 | GGAAGAC  |
| ENSG00000104859 | AGCAGCA  |
| ENSG00000104859 | GCAGCAU  |
| ENSG00000104863 | AAUACUG  |
| ENSG00000104863 | ACUGUAG  |
| ENSG00000104870 | GGCUCAG  |
| ENSG00000104880 | AACACUG  |
| ENSG00000104880 | AAGUGCU  |
| ENSG00000104880 | AUGGCAC  |
| ENSG00000104881 | GGAGGCA  |
| ENSG00000104885 | AAAAAUC  |
| ENSG00000104885 | AAAACUG  |
| ENSG00000104885 | AAAGUAA  |
| ENSG00000104885 | AAUACUG  |
| ENSG00000104885 | ACAGUAC  |
| ENSG00000104885 | AGCACCA  |
| ENSG00000104885 | CUUUGGU  |

|                 |         |
|-----------------|---------|
| ENSG00000104885 | GAGGUAG |
| ENSG00000104885 | GAGGUAU |
| ENSG00000104885 | UAUAAAG |
| ENSG00000104885 | UCACAGG |
| ENSG00000104885 | UCACAGU |
| ENSG00000104885 | UCCUUGC |
| ENSG00000104885 | UGCAUAG |
| ENSG00000104885 | UGCAUUA |
| ENSG00000104885 | UUGGUCC |
| ENSG00000104886 | UCACAGG |
| ENSG00000104886 | UCACAGU |
| ENSG00000104888 | AUAAAGU |
| ENSG00000104888 | CCAGGAG |
| ENSG00000104888 | CUGGAAA |
| ENSG00000104888 | GGAGGCA |
| ENSG00000104888 | GGCAGGG |
| ENSG00000104888 | GGGGCAG |
| ENSG00000104888 | UCCCUUU |
| ENSG00000104888 | UGAGAAU |
| ENSG00000104888 | UGGCCAC |
| ENSG00000104903 | CCUUCUU |
| ENSG00000104904 | ACAAUAU |
| ENSG00000104904 | UUUGCAC |
| ENSG00000104936 | GGAAUGU |
| ENSG00000104936 | GUGGGGA |
| ENSG00000104938 | ACUGUGU |
| ENSG00000104946 | AAAGUGC |
| ENSG00000104957 | AAGGCAC |
| ENSG00000104960 | CACCAGC |
| ENSG00000104960 | CUGGGCA |
| ENSG00000104964 | AAGGCAC |
| ENSG00000104967 | AGGGAGG |
| ENSG00000104967 | CACAGGG |
| ENSG00000104967 | UCACACA |
| ENSG00000104969 | CUGGCUC |
| ENSG00000104969 | GCAGGUU |
| ENSG00000104969 | GCUGGUG |
| ENSG00000104969 | GGCAGUG |
| ENSG00000104969 | GGCUCUG |
| ENSG00000104983 | UACAAAG |
| ENSG00000105011 | AGGGAGG |
| ENSG00000105011 | UAAUAUC |
| ENSG00000105053 | CAGCAGG |
| ENSG00000105085 | AAACUGU |
| ENSG00000105085 | AACUGGU |
| ENSG00000105085 | AAGGCAC |
| ENSG00000105085 | ACUGUAG |
| ENSG00000105085 | AGCAAAA |
| ENSG00000105085 | AGCACCA |
| ENSG00000105085 | AGCAGCG |
| ENSG00000105085 | AGCAGCU |
| ENSG00000105085 | CCUUCUG |
| ENSG00000105085 | CUCCAC  |
| ENSG00000105085 | GGUGGUU |
| ENSG00000105085 | GUGCCUG |
| ENSG00000105085 | UGCAAAG |
| ENSG00000105135 | CUUGGGC |
| ENSG00000105137 | AACUGGU |
| ENSG00000105137 | AAGUGCA |
| ENSG00000105137 | AAGUGCU |
| ENSG00000105137 | AGCAGCA |
| ENSG00000105137 | GGCAGCG |
| ENSG00000105137 | UCACAGU |
| ENSG00000105137 | UGCUCAC |



|                 |         |
|-----------------|---------|
| ENSG00000105173 | AGCAGCG |
| ENSG00000105173 | AGCAGCU |
| ENSG00000105173 | GCAGCAU |
| ENSG00000105176 | AAAACUG |
| ENSG00000105176 | CAGCUGG |
| ENSG00000105186 | AUGUGCC |
| ENSG00000105186 | GUGCCAC |
| ENSG00000105186 | UAUAAAG |
| ENSG00000105186 | UGUGCUU |
| ENSG00000105186 | UCCAUA  |
| ENSG00000105186 | UUGGCAA |
| ENSG00000105202 | UAAUAGU |
| ENSG00000105204 | AUGGCUU |
| ENSG00000105204 | CAGUGCA |
| ENSG00000105204 | GGGCCCC |
| ENSG00000105216 | AAUUUUA |
| ENSG00000105216 | AGUGCUG |
| ENSG00000105216 | CCAGUGC |
| ENSG00000105216 | UCAUGAU |
| ENSG00000105216 | UUGGCAC |
| ENSG00000105219 | CAGGCUC |
| ENSG00000105219 | CCAGCAU |
| ENSG00000105219 | CUCCAGC |
| ENSG00000105219 | GAGAAGA |
| ENSG00000105219 | GGAAGAC |
| ENSG00000105219 | GGAGGCA |
| ENSG00000105219 | GGGUGGU |
| ENSG00000105219 | UGAGGAC |
| ENSG00000105220 | CUCUGGG |
| ENSG00000105221 | AAGGCAC |
| ENSG00000105221 | AAUACUG |
| ENSG00000105221 | AGGCAGG |
| ENSG00000105221 | CUGGGCA |
| ENSG00000105221 | GAAGGAA |
| ENSG00000105221 | GAGGUAG |
| ENSG00000105221 | GCAGAAG |
| ENSG00000105221 | GGAAGCC |
| ENSG00000105221 | GGAGGCA |
| ENSG00000105221 | GGCACGG |
| ENSG00000105221 | GUAACAG |
| ENSG00000105221 | UGAAAUG |
| ENSG00000105221 | UUCUGCA |
| ENSG00000105223 | CCAGCAU |
| ENSG00000105223 | CCCCAG  |
| ENSG00000105223 | GAGGUAG |
| ENSG00000105223 | GGGGUGG |
| ENSG00000105227 | GGGGAGC |
| ENSG00000105227 | UAGUGAG |
| ENSG00000105227 | UGGGACA |
| ENSG00000105229 | AGCACCA |
| ENSG00000105229 | GUCCAGA |
| ENSG00000105229 | UCCAGAG |
| ENSG00000105245 | AAAAGUA |
| ENSG00000105245 | AAAGUAC |
| ENSG00000105245 | AACACUG |
| ENSG00000105245 | ACACACC |
| ENSG00000105245 | AGCCCUU |
| ENSG00000105245 | AGUGGUU |
| ENSG00000105245 | CCCUGAG |
| ENSG00000105245 | CUUGUAU |
| ENSG00000105245 | GAGACCU |
| ENSG00000105245 | GAGGUAG |
| ENSG00000105245 | GAGGUAU |
| ENSG00000105245 | GGGUGGU |

|                 |         |
|-----------------|---------|
| ENSG00000105245 | GGUGGGC |
| ENSG00000105245 | UAAUACA |
| ENSG00000105245 | UAUAAUA |
| ENSG00000105245 | UCUGGAA |
| ENSG00000105245 | UGGCCCU |
| ENSG00000105245 | UGGCUGC |
| ENSG00000105245 | UGUGCUU |
| ENSG00000105255 | AGCAGCA |
| ENSG00000105255 | CCAGUGU |
| ENSG00000105270 | AAGGCAC |
| ENSG00000105270 | AAUCUCU |
| ENSG00000105270 | GACCAUG |
| ENSG00000105270 | GAGCUGC |
| ENSG00000105270 | GGUGGUC |
| ENSG00000105270 | UCAUACA |
| ENSG00000105270 | UCCUGU  |
| ENSG00000105281 | CCCUGAG |
| ENSG00000105323 | AAAAGUA |
| ENSG00000105323 | ACUGCAU |
| ENSG00000105323 | CAGUAC  |
| ENSG00000105323 | UGCAAAG |
| ENSG00000105325 | CACAAUG |
| ENSG00000105327 | AGCACCA |
| ENSG00000105327 | AUUCAUU |
| ENSG00000105327 | CCCUGAG |
| ENSG00000105327 | CUACAGU |
| ENSG00000105327 | CUGACUC |
| ENSG00000105327 | CUGGCUC |
| ENSG00000105327 | GAAACAU |
| ENSG00000105327 | GAGAUGA |
| ENSG00000105327 | GAGGCAG |
| ENSG00000105327 | GCUACAU |
| ENSG00000105327 | GGCUCAG |
| ENSG00000105327 | GGGGGAA |
| ENSG00000105327 | GGUGGGC |
| ENSG00000105327 | UCACAGU |
| ENSG00000105327 | UCAUUCG |
| ENSG00000105327 | UCCACC  |
| ENSG00000105327 | UCCUGAG |
| ENSG00000105329 | GCGGGGC |
| ENSG00000105329 | GGCGGGG |
| ENSG00000105357 | GGGGGAA |
| ENSG00000105357 | UGGGGGA |
| ENSG00000105369 | GAGGCAG |
| ENSG00000105401 | CAAAGCA |
| ENSG00000105402 | CUGCAGC |
| ENSG00000105402 | UGCAGCU |
| ENSG00000105409 | AAAGAGC |
| ENSG00000105409 | AGGGAGG |
| ENSG00000105419 | GAGGUAG |
| ENSG00000105426 | GGAAUGU |
| ENSG00000105426 | UAGACUG |
| ENSG00000105426 | UGACUGU |
| ENSG00000105426 | UGUCUUU |
| ENSG00000105429 | AGUGCCU |
| ENSG00000105429 | CCCUGAG |
| ENSG00000105429 | GACCCUG |
| ENSG00000105429 | GAUUGUC |
| ENSG00000105429 | GCCCUGU |
| ENSG00000105429 | GUGCCUG |
| ENSG00000105429 | UGAGAAU |
| ENSG00000105438 | CAAGAGC |
| ENSG00000105438 | CCCCUGG |
| ENSG00000105438 | CUACAAA |

|                 |         |
|-----------------|---------|
| ENSG00000105438 | UAUAAAG |
| ENSG00000105438 | UCCUGAG |
| ENSG00000105438 | UUCAAGC |
| ENSG00000105438 | UUGGCAA |
| ENSG00000105438 | UUGGCAC |
| ENSG00000105447 | CUUUGGU |
| ENSG00000105464 | AAAAACC |
| ENSG00000105464 | AACACUG |
| ENSG00000105464 | ACCCGGC |
| ENSG00000105464 | CUCACAC |
| ENSG00000105464 | GAGCUGC |
| ENSG00000105464 | GCGGGGC |
| ENSG00000105464 | GGAGGCA |
| ENSG00000105464 | GGGAGCU |
| ENSG00000105464 | GGUGGGC |
| ENSG00000105464 | GGUUUAC |
| ENSG00000105464 | GUGUGGC |
| ENSG00000105464 | UGGAGAU |
| ENSG00000105464 | UGUGUGG |
| ENSG00000105514 | CCCUGAG |
| ENSG00000105516 | AAAAAUC |
| ENSG00000105519 | GACCUGG |
| ENSG00000105538 | UAUUGCU |
| ENSG00000105538 | UUCAAGC |
| ENSG00000105549 | GGGUGUU |
| ENSG00000105552 | CUUUGGU |
| ENSG00000105552 | GCCCUUA |
| ENSG00000105552 | GGCAUUG |
| ENSG00000105552 | UUCAAAU |
| ENSG00000105552 | UUGGCAA |
| ENSG00000105552 | UUGGCAC |
| ENSG00000105556 | AAAGUGC |
| ENSG00000105556 | AGCAGCU |
| ENSG00000105556 | AUGGCUU |
| ENSG00000105556 | GAGGUAU |
| ENSG00000105556 | GCUGGUG |
| ENSG00000105556 | GGCUCUG |
| ENSG00000105556 | GGUGCGG |
| ENSG00000105556 | GUAAACA |
| ENSG00000105556 | UCACAGG |
| ENSG00000105556 | UCACAGU |
| ENSG00000105556 | UGAAGUG |
| ENSG00000105556 | UUCAAAU |
| ENSG00000105556 | UUGGCAC |
| ENSG00000105559 | AAAGUUU |
| ENSG00000105559 | UGGCUGC |
| ENSG00000105568 | AGCAGCA |
| ENSG00000105568 | GACCAUG |
| ENSG00000105576 | AAAUGGU |
| ENSG00000105576 | AACUCUA |
| ENSG00000105576 | AAUCUCA |
| ENSG00000105576 | ACUCAAA |
| ENSG00000105576 | AUGGCUU |
| ENSG00000105576 | CACUCCU |
| ENSG00000105576 | CAGCAGA |
| ENSG00000105576 | CAGGCUC |
| ENSG00000105576 | CUCCAC  |
| ENSG00000105576 | GAGACCU |
| ENSG00000105576 | GCAGAAG |
| ENSG00000105576 | GGAAUGU |
| ENSG00000105576 | UCCAGAG |
| ENSG00000105576 | UGAGAAG |
| ENSG00000105583 | AGGCAGG |
| ENSG00000105583 | GGCAGGG |

|                 |         |
|-----------------|---------|
| ENSG00000105613 | UAUAUGA |
| ENSG00000105643 | CUGGACU |
| ENSG00000105647 | GUAAACA |
| ENSG00000105647 | UUGGAGG |
| ENSG00000105649 | GACAACU |
| ENSG00000105656 | AAAACUG |
| ENSG00000105656 | AACAUUC |
| ENSG00000105656 | AAUACUG |
| ENSG00000105656 | ACAGUAC |
| ENSG00000105656 | AGCAUUC |
| ENSG00000105656 | AGGGAGG |
| ENSG00000105656 | CCUGAG  |
| ENSG00000105656 | GGAGGCA |
| ENSG00000105656 | GGGGAGC |
| ENSG00000105656 | GUAACAG |
| ENSG00000105656 | UCUCAA  |
| ENSG00000105656 | UUGGCAC |
| ENSG00000105662 | AAAGGUA |
| ENSG00000105662 | AACAGUC |
| ENSG00000105662 | AAGUCUU |
| ENSG00000105662 | ACAGUAU |
| ENSG00000105662 | GGCAGUG |
| ENSG00000105662 | UAUUACC |
| ENSG00000105662 | UCACAGU |
| ENSG00000105662 | UCCAGUU |
| ENSG00000105662 | UGCAAAG |
| ENSG00000105662 | UGCAUAG |
| ENSG00000105662 | UGCAUUA |
| ENSG00000105662 | UUGGCAA |
| ENSG00000105695 | UCCUGAG |
| ENSG00000105698 | AAAGAAU |
| ENSG00000105698 | ACACACC |
| ENSG00000105698 | AUUGCAC |
| ENSG00000105698 | CAGCUGG |
| ENSG00000105698 | CCCUGUC |
| ENSG00000105698 | CUGGGGG |
| ENSG00000105698 | GAGGCAG |
| ENSG00000105698 | GAGGGGC |
| ENSG00000105698 | GGAGGCA |
| ENSG00000105698 | UAUUGCU |
| ENSG00000105698 | UCCCUCU |
| ENSG00000105698 | UGGGGGA |
| ENSG00000105700 | CUCCAGC |
| ENSG00000105700 | GGCUCUG |
| ENSG00000105701 | CUGCCCC |
| ENSG00000105701 | GCCUGGG |
| ENSG00000105701 | GGGCCCC |
| ENSG00000105707 | CAAAACU |
| ENSG00000105711 | AACUACU |
| ENSG00000105711 | CAAAACU |
| ENSG00000105711 | CAGCAGA |
| ENSG00000105711 | CUGCCCC |
| ENSG00000105711 | GCAGAAG |
| ENSG00000105711 | GCUGGUG |
| ENSG00000105711 | GUGCAA  |
| ENSG00000105711 | UAUUGCU |
| ENSG00000105711 | UCAUGAU |
| ENSG00000105722 | ACAUUCA |
| ENSG00000105722 | AGCAAAA |
| ENSG00000105722 | AGCAGCU |
| ENSG00000105722 | AGGGAGG |
| ENSG00000105722 | CAGCAA  |
| ENSG00000105722 | CAGCUGG |
| ENSG00000105722 | CCCCUGG |

|                 |          |
|-----------------|----------|
| ENSG00000105722 | CCUGCUG  |
| ENSG00000105722 | CUCCAGC  |
| ENSG00000105722 | CUGGGCA  |
| ENSG00000105722 | GAGGGGC  |
| ENSG00000105722 | GAUUGUA  |
| ENSG00000105722 | GGAGGCA  |
| ENSG00000105722 | GGGGUGG  |
| ENSG00000105722 | UCCAGUU  |
| ENSG00000105722 | UCUCCAA  |
| ENSG00000105723 | AGGGAGG  |
| ENSG00000105723 | GAGGCUG  |
| ENSG00000105726 | AAGGUGC  |
| ENSG00000105737 | UCAUAGA  |
| ENSG00000105738 | AAAGUGC  |
| ENSG00000105738 | AACUCUA  |
| ENSG00000105738 | AAGUGCU  |
| ENSG00000105738 | AAUCUCA  |
| ENSG00000105738 | CACAGUG  |
| ENSG00000105738 | UAUUGCU  |
| ENSG00000105738 | UCACAGU  |
| ENSG00000105738 | UCUCAAG  |
| ENSG00000105738 | UUAGAGA  |
| ENSG00000105738 | UUUGCAA  |
| ENSG00000105738 | UUUGCAC  |
| ENSG00000105767 | AUAU AAC |
| ENSG00000105767 | AUGGCUU  |
| ENSG00000105767 | GCCUGGA  |
| ENSG00000105767 | GGAGAGA  |
| ENSG00000105767 | GGAGGAG  |
| ENSG00000105767 | GGCAGUG  |
| ENSG00000105767 | GGUGGUC  |
| ENSG00000105767 | UAAUAUC  |
| ENSG00000105767 | UGCAGCU  |
| ENSG00000105767 | UUUGCAA  |
| ENSG00000105810 | AACACUG  |
| ENSG00000105810 | ACCCUGU  |
| ENSG00000105810 | ACUCAGC  |
| ENSG00000105810 | AGCAGCA  |
| ENSG00000105810 | AGCUU AU |
| ENSG00000105810 | AGUGUGC  |
| ENSG00000105810 | AUUGCAC  |
| ENSG00000105810 | CACAGGG  |
| ENSG00000105810 | CAGCAGG  |
| ENSG00000105810 | CAGUGCA  |
| ENSG00000105810 | CUCACAC  |
| ENSG00000105810 | CUCU UCC |
| ENSG00000105810 | CUGGCUC  |
| ENSG00000105810 | CUUCUCU  |
| ENSG00000105810 | CUUGGAG  |
| ENSG00000105810 | GCAGCAU  |
| ENSG00000105810 | GCUGGUG  |
| ENSG00000105810 | GGAAGCC  |
| ENSG00000105810 | GGA AUGU |
| ENSG00000105810 | GGCAGCG  |
| ENSG00000105810 | GUGCCUG  |
| ENSG00000105810 | UAAGACU  |
| ENSG00000105810 | UCAACAG  |
| ENSG00000105810 | UCACAGG  |
| ENSG00000105810 | UCACAGU  |
| ENSG00000105810 | UCCUGAG  |
| ENSG00000105810 | UCCUUGC  |
| ENSG00000105810 | UGCAGCU  |
| ENSG00000105810 | UUCAAGC  |
| ENSG00000105810 | UUGGCAA  |

|                 |          |
|-----------------|----------|
| ENSG00000105819 | AUAAUAC  |
| ENSG00000105821 | UAUAAAG  |
| ENSG00000105825 | UCACAUU  |
| ENSG00000105829 | GGAAUGU  |
| ENSG00000105849 | AUGUCUG  |
| ENSG00000105849 | GAAGGAA  |
| ENSG00000105851 | ACCAGCA  |
| ENSG00000105851 | CAGCAGA  |
| ENSG00000105854 | CAGUAGA  |
| ENSG00000105855 | ACAGUAU  |
| ENSG00000105855 | ACCCUGU  |
| ENSG00000105855 | AGCAGCU  |
| ENSG00000105855 | AGCUGCC  |
| ENSG00000105855 | AGUAACA  |
| ENSG00000105855 | AGUAGUU  |
| ENSG00000105855 | AGUGCAA  |
| ENSG00000105855 | AUAAAGU  |
| ENSG00000105855 | AUGCAUU  |
| ENSG00000105855 | AUGCCUU  |
| ENSG00000105855 | CAGCAGA  |
| ENSG00000105855 | CAGCAGG  |
| ENSG00000105855 | CUCACAC  |
| ENSG00000105855 | GAGGUAG  |
| ENSG00000105855 | GCUACAU  |
| ENSG00000105855 | GGCAGUG  |
| ENSG00000105855 | GUCAUUG  |
| ENSG00000105855 | GUGACAG  |
| ENSG00000105855 | GUGACUG  |
| ENSG00000105855 | UACAGUU  |
| ENSG00000105855 | UCAUAGA  |
| ENSG00000105855 | UGUAUGU  |
| ENSG00000105856 | AAGGCAC  |
| ENSG00000105856 | ACCACAG  |
| ENSG00000105856 | AGUAACA  |
| ENSG00000105856 | GAUUGUA  |
| ENSG00000105856 | GGUUUAC  |
| ENSG00000105856 | UGAAAUG  |
| ENSG00000105856 | UUGGUUC  |
| ENSG00000105856 | UUUCAAC  |
| ENSG00000105866 | AAGUGCA  |
| ENSG00000105866 | ACCACAG  |
| ENSG00000105866 | AUGUAAU  |
| ENSG00000105866 | CACAGUG  |
| ENSG00000105866 | UGCAAAG  |
| ENSG00000105877 | AAAGAAU  |
| ENSG00000105877 | CCUGCUG  |
| ENSG00000105877 | GGAGGCA  |
| ENSG00000105879 | CUCUGGG  |
| ENSG00000105879 | UCACAAG  |
| ENSG00000105880 | AAGGCAC  |
| ENSG00000105880 | GCACCAU  |
| ENSG00000105880 | UCAUAGA  |
| ENSG00000105887 | AACACUG  |
| ENSG00000105887 | AAGGCAC  |
| ENSG00000105887 | AAUUAUU  |
| ENSG00000105887 | ACAGUAU  |
| ENSG00000105887 | ACAUUCA  |
| ENSG00000105887 | AGCAGCU  |
| ENSG00000105887 | CAAAGCA  |
| ENSG00000105887 | CAGUCCA  |
| ENSG00000105887 | CCAUUAC  |
| ENSG00000105887 | CUUUGGU  |
| ENSG00000105887 | GAGGUAG  |
| ENSG00000105887 | GAGGUAAU |

|                 |         |
|-----------------|---------|
| ENSG00000105887 | GCAGAAG |
| ENSG00000105887 | GGAAUGU |
| ENSG00000105887 | GGGAGCU |
| ENSG00000105887 | GUGACAG |
| ENSG00000105887 | GUGAGGU |
| ENSG00000105887 | UCAAGUA |
| ENSG00000105887 | UCUCCAA |
| ENSG00000105887 | UUCUGCA |
| ENSG00000105887 | UUGUUCG |
| ENSG00000105887 | UUUGCAA |
| ENSG00000105887 | UUUGCAC |
| ENSG00000105928 | AGCAUUC |
| ENSG00000105939 | AGUGGUU |
| ENSG00000105939 | GGAGAGA |
| ENSG00000105948 | AAGGCAC |
| ENSG00000105953 | UCCCUGU |
| ENSG00000105953 | UGCAAAG |
| ENSG00000105953 | UUGGCAA |
| ENSG00000105967 | AAAUCCC |
| ENSG00000105967 | AGCAGCA |
| ENSG00000105967 | AUCCCUU |
| ENSG00000105967 | CACCAGC |
| ENSG00000105967 | CCAGCAU |
| ENSG00000105967 | UCCCUUG |
| ENSG00000105967 | UUCUUGU |
| ENSG00000105971 | AGUGCAA |
| ENSG00000105971 | CAGUAGA |
| ENSG00000105971 | CAGUAGU |
| ENSG00000105971 | CAGUGCA |
| ENSG00000105971 | GACAACU |
| ENSG00000105974 | AAAGUAA |
| ENSG00000105974 | AGCAAAA |
| ENSG00000105974 | AUGGAUU |
| ENSG00000105974 | CCAGUGU |
| ENSG00000105974 | UGAAAUG |
| ENSG00000105976 | ACAGUAC |
| ENSG00000105976 | ACAGUAU |
| ENSG00000105976 | CACAGUG |
| ENSG00000105976 | CAGUGCA |
| ENSG00000105976 | GCAGGUU |
| ENSG00000105976 | GUGGCCC |
| ENSG00000105976 | UCACAGG |
| ENSG00000105976 | UCACAGU |
| ENSG00000105983 | AGCUUAU |
| ENSG00000105983 | CUGCUCU |
| ENSG00000105983 | GAAGGAA |
| ENSG00000105983 | GAGAAAU |
| ENSG00000105983 | GGAAUGU |
| ENSG00000105983 | GUGCAAA |
| ENSG00000105983 | UGUCUGC |
| ENSG00000105983 | UGUCUGG |
| ENSG00000105991 | ACCCGUA |
| ENSG00000105991 | AUUCAUU |
| ENSG00000105991 | GAUUGUA |
| ENSG00000105997 | AAAGCGC |
| ENSG00000105997 | ACACACC |
| ENSG00000105997 | ACACACU |
| ENSG00000105997 | ACCAGCA |
| ENSG00000105997 | ACGUCAU |
| ENSG00000105997 | AGAUAAA |
| ENSG00000105997 | AGCAGCA |
| ENSG00000105997 | CAAAGCA |
| ENSG00000105997 | CCUUCUG |
| ENSG00000105997 | CUGACUC |

|                 |          |
|-----------------|----------|
| ENSG00000105997 | GUUCAUG  |
| ENSG00000105997 | UAAUAUC  |
| ENSG00000105997 | UCACCAC  |
| ENSG00000105997 | UGACUGU  |
| ENSG00000105997 | UGCAAAG  |
| ENSG00000105997 | UUGUUCG  |
| ENSG00000106003 | AAUACUG  |
| ENSG00000106003 | ACAAUUAU |
| ENSG00000106003 | CUGACUC  |
| ENSG00000106003 | UCCAGAG  |
| ENSG00000106003 | UCCCUGU  |
| ENSG00000106003 | UCCCUUG  |
| ENSG00000106003 | UCCCUUU  |
| ENSG00000106003 | UGAUCCA  |
| ENSG00000106003 | UGGAUAA  |
| ENSG00000106004 | AAUACUG  |
| ENSG00000106004 | AGUAACA  |
| ENSG00000106004 | AGUGCAA  |
| ENSG00000106004 | CAGGCUC  |
| ENSG00000106004 | CUUCACC  |
| ENSG00000106004 | CUUGGAG  |
| ENSG00000106004 | UCACAGG  |
| ENSG00000106004 | UCACAGU  |
| ENSG00000106004 | UCAUGAU  |
| ENSG00000106006 | UGCAAAG  |
| ENSG00000106013 | UGAAAUG  |
| ENSG00000106025 | AAGACAU  |
| ENSG00000106025 | ACAGUAC  |
| ENSG00000106025 | CCCUGAG  |
| ENSG00000106025 | UAAGACG  |
| ENSG00000106025 | UAAGACU  |
| ENSG00000106025 | UCACAUU  |
| ENSG00000106034 | GAGGUAG  |
| ENSG00000106069 | AAUACUG  |
| ENSG00000106069 | AUAAUAC  |
| ENSG00000106070 | AAAGGUA  |
| ENSG00000106070 | AGCAGCA  |
| ENSG00000106070 | AGUGAUC  |
| ENSG00000106070 | AGUGCAA  |
| ENSG00000106070 | CAAUUGC  |
| ENSG00000106070 | CACAGGG  |
| ENSG00000106070 | CAGCAGG  |
| ENSG00000106070 | CAGGCUC  |
| ENSG00000106070 | CAGUCCA  |
| ENSG00000106070 | CCAGUGC  |
| ENSG00000106070 | CCUUCUU  |
| ENSG00000106070 | GAGGCAG  |
| ENSG00000106070 | GCAGAAG  |
| ENSG00000106070 | GGCAAGA  |
| ENSG00000106070 | GUGAGGU  |
| ENSG00000106070 | GUGCAA   |
| ENSG00000106070 | UAAUACA  |
| ENSG00000106070 | UAUAAAAG |
| ENSG00000106070 | UCAACAG  |
| ENSG00000106070 | UCACAGG  |
| ENSG00000106070 | UCCCUGU  |
| ENSG00000106077 | UGCCAGC  |
| ENSG00000106077 | UGUCUUU  |
| ENSG00000106078 | AACCUGG  |
| ENSG00000106078 | AACCUGU  |
| ENSG00000106078 | UUGGCAC  |
| ENSG00000106080 | AAGUCUU  |
| ENSG00000106080 | UUCAAAU  |
| ENSG00000106080 | UUUCAAC  |



|                 |          |
|-----------------|----------|
| ENSG00000106089 | AAAAAUC  |
| ENSG00000106089 | AAAUUUC  |
| ENSG00000106089 | AAUACUG  |
| ENSG00000106089 | ACUGCAG  |
| ENSG00000106089 | ACUGCAU  |
| ENSG00000106089 | AGCACCA  |
| ENSG00000106089 | AGCAGCA  |
| ENSG00000106089 | CACAGUG  |
| ENSG00000106089 | CUUUGGU  |
| ENSG00000106089 | GCACCAU  |
| ENSG00000106089 | GGCAGUG  |
| ENSG00000106089 | UCACAGU  |
| ENSG00000106089 | UGGCUGC  |
| ENSG00000106100 | AACAAAC  |
| ENSG00000106123 | UCCCUUG  |
| ENSG00000106144 | CCCUGAG  |
| ENSG00000106144 | UGGAUAA  |
| ENSG00000106144 | UUGGCAA  |
| ENSG00000106236 | AUAAUAC  |
| ENSG00000106236 | AUAUAAC  |
| ENSG00000106236 | CACAGUG  |
| ENSG00000106236 | CUACAAA  |
| ENSG00000106236 | UAUAAAAG |
| ENSG00000106236 | UUGGCAA  |
| ENSG00000106236 | UUGGCAC  |
| ENSG00000106244 | AAAAACC  |
| ENSG00000106244 | AACAUUC  |
| ENSG00000106244 | ACAUUCA  |
| ENSG00000106244 | AGCAAAA  |
| ENSG00000106244 | AGCAGCA  |
| ENSG00000106244 | AGCAGCG  |
| ENSG00000106244 | CACAGGG  |
| ENSG00000106244 | CAGGCUC  |
| ENSG00000106244 | CUCAAAC  |
| ENSG00000106244 | CUCCAC   |
| ENSG00000106244 | GAGGGGC  |
| ENSG00000106244 | GCCUGGA  |
| ENSG00000106244 | GGCAGGG  |
| ENSG00000106244 | GGUUACC  |
| ENSG00000106244 | GUGCCAC  |
| ENSG00000106261 | AGCAGCA  |
| ENSG00000106261 | AGUGAUC  |
| ENSG00000106261 | CUUCUCU  |
| ENSG00000106261 | GCAGCAU  |
| ENSG00000106261 | GGGGGAA  |
| ENSG00000106261 | UAGACUG  |
| ENSG00000106261 | UUGGUUC  |
| ENSG00000106263 | AAGGCAC  |
| ENSG00000106263 | GUCCAGA  |
| ENSG00000106263 | UCCAGAG  |
| ENSG00000106278 | AAAUUUC  |
| ENSG00000106278 | UAUAAAAG |
| ENSG00000106290 | UACAAAAG |
| ENSG00000106299 | AAAAGUA  |
| ENSG00000106299 | AGCAGCA  |
| ENSG00000106299 | AGUGCUU  |
| ENSG00000106299 | AUGAUGA  |
| ENSG00000106299 | CCAGUGC  |
| ENSG00000106299 | GAAUUGU  |
| ENSG00000106299 | GAGGUAG  |
| ENSG00000106299 | GGUAGAC  |
| ENSG00000106302 | UCCCUUU  |
| ENSG00000106328 | AAGUUGU  |
| ENSG00000106330 | AAAUCCC  |

|                 |         |
|-----------------|---------|
| ENSG00000106330 | CACAGUG |
| ENSG00000106330 | UCACAGU |
| ENSG00000106331 | AGGCAGG |
| ENSG00000106331 | CAGGUGA |
| ENSG00000106331 | GGCAGGG |
| ENSG00000106331 | UAUUACC |
| ENSG00000106336 | UGGGGGA |
| ENSG00000106341 | AAAGAGG |
| ENSG00000106341 | CUCAGGG |
| ENSG00000106346 | AGCACCA |
| ENSG00000106346 | GAGUCUU |
| ENSG00000106346 | GCAGCAU |
| ENSG00000106346 | UGAGUCU |
| ENSG00000106348 | AAGUGUG |
| ENSG00000106348 | AGCACCA |
| ENSG00000106348 | AGGCAGG |
| ENSG00000106348 | AGUGUGC |
| ENSG00000106348 | GAGGCAG |
| ENSG00000106348 | GCACCAU |
| ENSG00000106348 | GGCAGGG |
| ENSG00000106348 | UGCAAAG |
| ENSG00000106348 | UGCAGCU |
| ENSG00000106355 | UACAAAG |
| ENSG00000106355 | UCAUGAU |
| ENSG00000106355 | UCCCUUG |
| ENSG00000106366 | AAGUCAC |
| ENSG00000106366 | ACAAGGU |
| ENSG00000106366 | ACCCUGU |
| ENSG00000106366 | AUGACAC |
| ENSG00000106366 | CAGUGCA |
| ENSG00000106366 | CCAGUGU |
| ENSG00000106366 | GAGAUGA |
| ENSG00000106366 | GGCAGUG |
| ENSG00000106366 | GUAAACA |
| ENSG00000106366 | UCCAGUU |
| ENSG00000106366 | UGAAGUG |
| ENSG00000106367 | AACCUGG |
| ENSG00000106367 | AACCUGU |
| ENSG00000106367 | GAGGUAG |
| ENSG00000106367 | UCCUCU  |
| ENSG00000106392 | AAGGCAC |
| ENSG00000106392 | UCACAGG |
| ENSG00000106392 | UCACAGU |
| ENSG00000106397 | AAGGCAC |
| ENSG00000106415 | AAUACUG |
| ENSG00000106415 | ACAUUCA |
| ENSG00000106415 | ACUGUUU |
| ENSG00000106415 | CUAUACA |
| ENSG00000106415 | UGCAUAG |
| ENSG00000106443 | GGAUGAG |
| ENSG00000106443 | UAUAAAG |
| ENSG00000106459 | AAAUUUC |
| ENSG00000106459 | ACUGUGU |
| ENSG00000106459 | AGGUUAU |
| ENSG00000106459 | AUACAAG |
| ENSG00000106459 | AUUGCAC |
| ENSG00000106459 | CAAAACU |
| ENSG00000106459 | CUCACAC |
| ENSG00000106459 | GACCCUG |
| ENSG00000106459 | GGAGGCA |
| ENSG00000106459 | UUGGCAA |
| ENSG00000106460 | ACAUUAC |
| ENSG00000106460 | CAAAACU |
| ENSG00000106460 | GUAAACA |

|                 |         |
|-----------------|---------|
| ENSG00000106460 | UCACAAG |
| ENSG00000106460 | UCAUUUG |
| ENSG00000106460 | UGACAUC |
| ENSG00000106460 | UGUAUAA |
| ENSG00000106460 | UUCUAAU |
| ENSG00000106460 | UUGACAC |
| ENSG00000106462 | ACAGUAU |
| ENSG00000106462 | GAGGUAG |
| ENSG00000106462 | UACAGUU |
| ENSG00000106477 | ACUGUAG |
| ENSG00000106477 | UAAUGCU |
| ENSG00000106477 | UCUUGAG |
| ENSG00000106477 | UGACAUC |
| ENSG00000106483 | AGAUGUG |
| ENSG00000106483 | UCACAUU |
| ENSG00000106483 | UGUCUGC |
| ENSG00000106484 | ACAUUCA |
| ENSG00000106484 | AGCACCA |
| ENSG00000106484 | AUUCAUU |
| ENSG00000106484 | GAGGUAU |
| ENSG00000106484 | GCACCAU |
| ENSG00000106484 | UAAUAGU |
| ENSG00000106484 | UCAUUUG |
| ENSG00000106541 | AACAUUC |
| ENSG00000106541 | GUAACAG |
| ENSG00000106546 | CACUCCU |
| ENSG00000106546 | GAGAAAU |
| ENSG00000106546 | GAGGCAG |
| ENSG00000106546 | GUGAGGU |
| ENSG00000106546 | UACAAAG |
| ENSG00000106546 | UUGGCAA |
| ENSG00000106546 | UUGUUCG |
| ENSG00000106571 | AGGGUUG |
| ENSG00000106571 | AGUGGUU |
| ENSG00000106571 | GCAGGAC |
| ENSG00000106571 | GGUUUAC |
| ENSG00000106571 | UACAAAG |
| ENSG00000106571 | UCCCUCU |
| ENSG00000106571 | UGAAAUG |
| ENSG00000106571 | UGACAUC |
| ENSG00000106571 | UUCUUGU |
| ENSG00000106588 | AAAAACC |
| ENSG00000106588 | AAUUUUA |
| ENSG00000106588 | GUCAUUG |
| ENSG00000106609 | AAAACUG |
| ENSG00000106609 | AAGGCAC |
| ENSG00000106609 | AAGGUGC |
| ENSG00000106609 | AGUGCCU |
| ENSG00000106609 | AUCAUAC |
| ENSG00000106609 | AUGCACC |
| ENSG00000106609 | CACAGUG |
| ENSG00000106609 | CAGCAGA |
| ENSG00000106609 | CUGCAGG |
| ENSG00000106609 | CUUUGGU |
| ENSG00000106609 | GAUUGGU |
| ENSG00000106609 | GUAUUCU |
| ENSG00000106609 | GUGCCUG |
| ENSG00000106609 | UAUAAAG |
| ENSG00000106609 | UCAAGUA |
| ENSG00000106609 | UCACAGG |
| ENSG00000106609 | UCACAGU |
| ENSG00000106609 | UGCUGAC |
| ENSG00000106609 | UGGCCCU |
| ENSG00000106609 | UGUCUUU |

|                 |         |
|-----------------|---------|
| ENSG00000106610 | AAAUUUC |
| ENSG00000106610 | AAGUGUG |
| ENSG00000106610 | AGAUAAA |
| ENSG00000106610 | AUAAUAC |
| ENSG00000106610 | AUGGAUU |
| ENSG00000106610 | CACACCU |
| ENSG00000106610 | CAGACAG |
| ENSG00000106610 | CAGCUGG |
| ENSG00000106610 | CCUUCUG |
| ENSG00000106610 | GGGUGUU |
| ENSG00000106610 | GUAUUCU |
| ENSG00000106610 | GUUAAUG |
| ENSG00000106610 | UAAUAGU |
| ENSG00000106610 | UAAUAUC |
| ENSG00000106610 | UCAAGUA |
| ENSG00000106610 | UGAAAUG |
| ENSG00000106610 | UGAAGUG |
| ENSG00000106610 | UGUCUUU |
| ENSG00000106615 | AACAAAC |
| ENSG00000106615 | AAUGCCC |
| ENSG00000106615 | ACAUUAC |
| ENSG00000106615 | AGUAGUU |
| ENSG00000106615 | AUAUAAC |
| ENSG00000106615 | CCAGUGU |
| ENSG00000106615 | UAAUGCU |
| ENSG00000106615 | UCAUUUG |
| ENSG00000106617 | AAAAAUC |
| ENSG00000106617 | AGGACAC |
| ENSG00000106617 | CAGUGCA |
| ENSG00000106617 | CAUAUUG |
| ENSG00000106617 | GAGGCAG |
| ENSG00000106617 | UCAAGUA |
| ENSG00000106633 | AAAAACC |
| ENSG00000106635 | AAAAAUC |
| ENSG00000106635 | AGCAGCU |
| ENSG00000106635 | AUGUCUG |
| ENSG00000106635 | CAGGCUC |
| ENSG00000106635 | CAGUGCA |
| ENSG00000106635 | CUUCACC |
| ENSG00000106635 | GAGCUGC |
| ENSG00000106635 | UUCCAUA |
| ENSG00000106636 | AGCCCUU |
| ENSG00000106636 | GACAACU |
| ENSG00000106636 | GGCAGGG |
| ENSG00000106636 | UCAUUUG |
| ENSG00000106638 | CUCCCAC |
| ENSG00000106665 | AACACUG |
| ENSG00000106665 | AAUACUG |
| ENSG00000106665 | CAAAGUG |
| ENSG00000106665 | GAUUGUC |
| ENSG00000106665 | GCCUGGG |
| ENSG00000106665 | GUUAAUG |
| ENSG00000106665 | UACAAAG |
| ENSG00000106665 | UCACAAG |
| ENSG00000106665 | UCUCCAA |
| ENSG00000106682 | AAAGUAC |
| ENSG00000106682 | AAAGUAU |
| ENSG00000106682 | AAAGUGC |
| ENSG00000106682 | AAAUGGU |
| ENSG00000106682 | ACUAGAU |
| ENSG00000106682 | CAGCAAA |
| ENSG00000106682 | CUGCAGG |
| ENSG00000106682 | GCAGGUU |
| ENSG00000106682 | UGUCUUU |

|                 |         |
|-----------------|---------|
| ENSG00000106683 | AAGUGCA |
| ENSG00000106683 | AUAAUAC |
| ENSG00000106683 | CACAGUG |
| ENSG00000106683 | CCCACCU |
| ENSG00000106683 | GAGAUGA |
| ENSG00000106683 | GCUGGUG |
| ENSG00000106683 | UCACAGG |
| ENSG00000106686 | AAUUAUU |
| ENSG00000106688 | AACACUG |
| ENSG00000106688 | ACAGUAU |
| ENSG00000106688 | CUUUGGU |
| ENSG00000106688 | GAGAAAU |
| ENSG00000106688 | UCAAGUA |
| ENSG00000106689 | AAAACUG |
| ENSG00000106689 | AAACUGU |
| ENSG00000106689 | AAAGAAU |
| ENSG00000106689 | AAUGUUG |
| ENSG00000106689 | ACAGUAU |
| ENSG00000106689 | CAAAACU |
| ENSG00000106692 | GGGUAAG |
| ENSG00000106692 | UACAAAG |
| ENSG00000106701 | AACACUG |
| ENSG00000106701 | AAGGCAC |
| ENSG00000106714 | UUUGCAA |
| ENSG00000106723 | AAACUGU |
| ENSG00000106723 | ACAUCAC |
| ENSG00000106723 | AAGUCUU |
| ENSG00000106723 | ACAUCAC |
| ENSG00000106723 | CACCAGC |
| ENSG00000106723 | CACUCCU |
| ENSG00000106723 | CAGGCUC |
| ENSG00000106723 | CAGUGCA |
| ENSG00000106723 | CCAGUGC |
| ENSG00000106723 | CCUUCUG |
| ENSG00000106723 | CUAUACA |
| ENSG00000106723 | CUUCACC |
| ENSG00000106723 | GGCAGCG |
| ENSG00000106723 | GGCUCAG |
| ENSG00000106723 | GGGUUUA |
| ENSG00000106723 | UAUAAAG |
| ENSG00000106723 | UCACACA |
| ENSG00000106723 | UCACAUU |
| ENSG00000106723 | UCACCAC |
| ENSG00000106723 | UGACAUC |
| ENSG00000106723 | UUCAAAU |
| ENSG00000106723 | UUGGCAA |
| ENSG00000106771 | AAGAACC |
| ENSG00000106771 | AAGGCAC |
| ENSG00000106771 | AAUACUG |
| ENSG00000106771 | AAUCUCU |
| ENSG00000106771 | AGCAGCA |
| ENSG00000106771 | AGCAGCG |
| ENSG00000106771 | AGGUAGU |
| ENSG00000106771 | CAAAGUG |
| ENSG00000106771 | CACAGGG |
| ENSG00000106771 | CCAGUGU |
| ENSG00000106771 | CUAUACA |
| ENSG00000106771 | CUUUGGU |
| ENSG00000106771 | GCUGGUG |
| ENSG00000106771 | UAAUGCU |
| ENSG00000106771 | UCACAGG |
| ENSG00000106771 | UUGGCAC |
| ENSG00000106771 | UUUCAAC |
| ENSG00000106772 | ACACACU |

|                 |          |
|-----------------|----------|
| ENSG00000106772 | AGGUAGU  |
| ENSG00000106772 | AUGGCAC  |
| ENSG00000106772 | CAAAGUG  |
| ENSG00000106772 | GAUAUGU  |
| ENSG00000106772 | UUCUUGU  |
| ENSG00000106780 | AAAAGUA  |
| ENSG00000106780 | AAUUAUU  |
| ENSG00000106780 | ACAAUUAU |
| ENSG00000106780 | ACAGUAC  |
| ENSG00000106780 | ACAUUAC  |
| ENSG00000106780 | AGGCAGG  |
| ENSG00000106780 | AUGGCUU  |
| ENSG00000106780 | CACCAGC  |
| ENSG00000106780 | CAGGAAC  |
| ENSG00000106780 | GAGAUGA  |
| ENSG00000106780 | GAGGCAG  |
| ENSG00000106780 | GAGUAUU  |
| ENSG00000106780 | UACAGUU  |
| ENSG00000106780 | UAGUGAG  |
| ENSG00000106780 | UCAAGUA  |
| ENSG00000106780 | UCAUACA  |
| ENSG00000106780 | UGUCUGG  |
| ENSG00000106780 | UUCUGCA  |
| ENSG00000106785 | GAGAAAU  |
| ENSG00000106785 | GUCUCUG  |
| ENSG00000106789 | CCCUGAG  |
| ENSG00000106799 | AAAGCUG  |
| ENSG00000106799 | AACCUGG  |
| ENSG00000106799 | ACCUGGA  |
| ENSG00000106799 | AGCUGCC  |
| ENSG00000106799 | AGUGGUU  |
| ENSG00000106799 | AUAAUAC  |
| ENSG00000106799 | CACAGUG  |
| ENSG00000106799 | CCCCUGG  |
| ENSG00000106799 | CUUACAG  |
| ENSG00000106799 | GAGACCU  |
| ENSG00000106799 | GAGGUAU  |
| ENSG00000106799 | GGAUUUC  |
| ENSG00000106799 | GGAUUUU  |
| ENSG00000106799 | GUGAGGU  |
| ENSG00000106799 | GUGCCAC  |
| ENSG00000106799 | GUUAAUG  |
| ENSG00000106799 | UAAGACG  |
| ENSG00000106799 | UAAGACU  |
| ENSG00000106799 | UAUCAGA  |
| ENSG00000106799 | UCACAGU  |
| ENSG00000106799 | UCAUAGA  |
| ENSG00000106799 | UCUUGAG  |
| ENSG00000106799 | UUGGUCC  |
| ENSG00000106829 | AAAAGUA  |
| ENSG00000106829 | AAACUGU  |
| ENSG00000106829 | AAAGUGC  |
| ENSG00000106829 | AAGGCAC  |
| ENSG00000106829 | AAGUGCU  |
| ENSG00000106829 | ACAUCAC  |
| ENSG00000106829 | ACCACAG  |
| ENSG00000106829 | ACUGUAG  |
| ENSG00000106829 | AGCAGCG  |
| ENSG00000106829 | AGCAGCU  |
| ENSG00000106829 | CAAAGUG  |
| ENSG00000106829 | CAGCAA   |
| ENSG00000106829 | CAGCAGG  |
| ENSG00000106829 | CAGUCCA  |
| ENSG00000106829 | CUAGUAA  |

|                 |          |
|-----------------|----------|
| ENSG00000106829 | CUAGUAG  |
| ENSG00000106829 | UGACAUC  |
| ENSG00000106829 | UUGAGGC  |
| ENSG00000106829 | UUGAUCA  |
| ENSG00000106852 | AAAGGUA  |
| ENSG00000106852 | AACAAAC  |
| ENSG00000106852 | AACACUG  |
| ENSG00000106852 | ACUGUAG  |
| ENSG00000106852 | AGGGUUG  |
| ENSG00000106852 | AUGUAAU  |
| ENSG00000106852 | CAAAGCA  |
| ENSG00000106852 | CAGACAG  |
| ENSG00000106852 | CAGCAGA  |
| ENSG00000106852 | CUGGGCA  |
| ENSG00000106852 | GAAAACA  |
| ENSG00000106852 | GGUUGUC  |
| ENSG00000106852 | GUAACAG  |
| ENSG00000106852 | UAUUACC  |
| ENSG00000106852 | UCCAGAG  |
| ENSG00000106852 | UCCACA   |
| ENSG00000106852 | UGAAAGG  |
| ENSG00000106852 | UGCAUUG  |
| ENSG00000106852 | UGCCAGC  |
| ENSG00000106948 | AUACAAG  |
| ENSG00000106948 | AUAU AAC |
| ENSG00000106948 | AUUCAUU  |
| ENSG00000106948 | CUUCUCU  |
| ENSG00000106948 | GCAGGAC  |
| ENSG00000106948 | GGCAGGG  |
| ENSG00000106948 | GGCUCAG  |
| ENSG00000106948 | UCAUUUG  |
| ENSG00000106948 | UGGCCAC  |
| ENSG00000106991 | CCUGCUG  |
| ENSG00000106991 | GGCUCUG  |
| ENSG00000106991 | GGGGUGC  |
| ENSG00000106991 | GGGGUGG  |
| ENSG00000106992 | AGUGCUG  |
| ENSG00000106992 | AGUGC UU |
| ENSG00000106992 | GAAAACA  |
| ENSG00000106992 | GCUUCCU  |
| ENSG00000106992 | GGAAGCC  |
| ENSG00000106992 | GGCAGGG  |
| ENSG00000106992 | GGCGGGG  |
| ENSG00000106993 | AAGUGCA  |
| ENSG00000106993 | AUAAAAGU |
| ENSG00000107021 | AAGGCAC  |
| ENSG00000107021 | CACAGUG  |
| ENSG00000107021 | CUUCUCU  |
| ENSG00000107021 | GAGGCAG  |
| ENSG00000107021 | UCAAGUA  |
| ENSG00000107104 | AAUACUG  |
| ENSG00000107104 | AAUUUUA  |
| ENSG00000107104 | AGCAGCA  |
| ENSG00000107104 | AGCAGCG  |
| ENSG00000107104 | AUGGCAC  |
| ENSG00000107105 | AAAGAGG  |
| ENSG00000107105 | AACAUUC  |
| ENSG00000107105 | AAGUGCA  |
| ENSG00000107105 | AAUCUCA  |
| ENSG00000107105 | ACAAUAU  |
| ENSG00000107105 | ACAUUAC  |
| ENSG00000107105 | ACAUUCA  |
| ENSG00000107105 | ACCCUGU  |
| ENSG00000107105 | ACUGCAG  |

|                 |         |
|-----------------|---------|
| ENSG00000107105 | ACUGCAU |
| ENSG00000107105 | AGUAACA |
| ENSG00000107105 | AUCACUA |
| ENSG00000107105 | AUCAUAC |
| ENSG00000107105 | AUGAGCU |
| ENSG00000107105 | CAGGUGA |
| ENSG00000107105 | CCAGGAG |
| ENSG00000107105 | CCUGUAC |
| ENSG00000107105 | CCUUCUU |
| ENSG00000107105 | CUCACAC |
| ENSG00000107105 | CUUACAG |
| ENSG00000107105 | CUUUGGU |
| ENSG00000107105 | GAUCAGA |
| ENSG00000107105 | GCAGGAC |
| ENSG00000107105 | GGCAAGA |
| ENSG00000107105 | GUAUUCU |
| ENSG00000107105 | GUGCAA  |
| ENSG00000107105 | GUUAAUG |
| ENSG00000107105 | UCACAGG |
| ENSG00000107105 | UCACAGU |
| ENSG00000107105 | UGAAGCU |
| ENSG00000107105 | UGCAUAG |
| ENSG00000107105 | UUAGGAU |
| ENSG00000107105 | UUAUGCA |
| ENSG00000107105 | UUCUUGU |
| ENSG00000107105 | UUGGCAA |
| ENSG00000107105 | UUGGCAC |
| ENSG00000107105 | UUGUUCG |
| ENSG00000107140 | CCGGAGC |
| ENSG00000107140 | UGAAAUG |
| ENSG00000107147 | UGUGCUU |
| ENSG00000107164 | AACGGAA |
| ENSG00000107164 | CACAGUG |
| ENSG00000107164 | CUUGGAG |
| ENSG00000107164 | GACUCC  |
| ENSG00000107164 | GGAAUGU |
| ENSG00000107164 | UAAGACU |
| ENSG00000107164 | UCCCUUU |
| ENSG00000107164 | UUGGAGG |
| ENSG00000107175 | AAUCACU |
| ENSG00000107175 | UGAAAUG |
| ENSG00000107186 | AAAGUGC |
| ENSG00000107186 | UUCUAAU |
| ENSG00000107187 | AAAGAGC |
| ENSG00000107187 | AAGUCUU |
| ENSG00000107187 | UGAAGUG |
| ENSG00000107187 | UUGGCAA |
| ENSG00000107187 | UUGGCAC |
| ENSG00000107201 | AUUCAUU |
| ENSG00000107223 | CAGCAGG |
| ENSG00000107249 | AAAACUG |
| ENSG00000107249 | AAAUCC  |
| ENSG00000107249 | AAGUGCA |
| ENSG00000107249 | AAUUAUU |
| ENSG00000107249 | ACAUUAC |
| ENSG00000107249 | ACAUUCA |
| ENSG00000107249 | AGAUGUG |
| ENSG00000107249 | AGCACCA |
| ENSG00000107249 | AUGACAC |
| ENSG00000107249 | AUGUGCC |
| ENSG00000107249 | AUUCAUU |
| ENSG00000107249 | CAAAGUG |
| ENSG00000107249 | CCUUCAU |
| ENSG00000107249 | CUAUACA |



|                 |         |
|-----------------|---------|
| ENSG00000107249 | CUCCCAA |
| ENSG00000107249 | GAAGGAA |
| ENSG00000107249 | GAUCAGA |
| ENSG00000107249 | GUGACAG |
| ENSG00000107249 | UAAUAGU |
| ENSG00000107249 | UAUAAUA |
| ENSG00000107249 | UCACAAG |
| ENSG00000107249 | UCAUGAU |
| ENSG00000107249 | UCCAGAG |
| ENSG00000107249 | UGACAUC |
| ENSG00000107249 | UGUAUAA |
| ENSG00000107249 | UUGACAC |
| ENSG00000107262 | CACUCCU |
| ENSG00000107262 | GAGAACU |
| ENSG00000107262 | GCUGGUG |
| ENSG00000107262 | UCCAGAG |
| ENSG00000107262 | UGAGAAG |
| ENSG00000107262 | UGAGAAU |
| ENSG00000107263 | AAAGUGC |
| ENSG00000107263 | AAGGCAC |
| ENSG00000107263 | AAUACUG |
| ENSG00000107263 | ACUGUUU |
| ENSG00000107263 | AGCUGCC |
| ENSG00000107263 | AUAAAGU |
| ENSG00000107263 | AUAUUAU |
| ENSG00000107263 | AUGUCUG |
| ENSG00000107263 | GAUUGUC |
| ENSG00000107263 | GUCUGCC |
| ENSG00000107263 | UCUUGAG |
| ENSG00000107263 | UGUCUGC |
| ENSG00000107282 | GCAGCAU |
| ENSG00000107290 | UCACAUU |
| ENSG00000107295 | GCAGCAU |
| ENSG00000107295 | UGCAUUA |
| ENSG00000107331 | AAGGCAC |
| ENSG00000107331 | UUGGCAA |
| ENSG00000107331 | UUGGUCC |
| ENSG00000107338 | AAAAACC |
| ENSG00000107338 | AAAGCUG |
| ENSG00000107338 | AACCUGG |
| ENSG00000107338 | AACCUGU |
| ENSG00000107338 | AGCAGCU |
| ENSG00000107338 | AGCAUUC |
| ENSG00000107338 | AUAUUAU |
| ENSG00000107338 | CACAAUG |
| ENSG00000107338 | CCUGUAC |
| ENSG00000107338 | CUCCAGC |
| ENSG00000107338 | CUGGCUC |
| ENSG00000107338 | CUUUGGU |
| ENSG00000107338 | GAAAACA |
| ENSG00000107338 | GGAUUUC |
| ENSG00000107338 | GGAUUUU |
| ENSG00000107338 | GGCAGCG |
| ENSG00000107338 | GGGAGCU |
| ENSG00000107338 | GGGGUGC |
| ENSG00000107338 | UAGAGGA |
| ENSG00000107338 | UCACAGG |
| ENSG00000107338 | UCACAGU |
| ENSG00000107338 | UCCUUGC |
| ENSG00000107338 | UGAAAGG |
| ENSG00000107338 | UGCAAAG |
| ENSG00000107338 | UUGUUCG |
| ENSG00000107338 | UUUGCAA |
| ENSG00000107341 | AAAGUAU |

|                 |          |
|-----------------|----------|
| ENSG00000107341 | AAGUAGC  |
| ENSG00000107341 | AAGUGCU  |
| ENSG00000107341 | ACACACU  |
| ENSG00000107341 | ACCAGCA  |
| ENSG00000107341 | AUGCACC  |
| ENSG00000107341 | CAGACAG  |
| ENSG00000107341 | GAAAACA  |
| ENSG00000107341 | GAGACCU  |
| ENSG00000107341 | GAUCAGA  |
| ENSG00000107341 | GAUUGUA  |
| ENSG00000107341 | GCAGCAU  |
| ENSG00000107341 | GCUGGUG  |
| ENSG00000107341 | GGCAGGG  |
| ENSG00000107341 | GUAAACA  |
| ENSG00000107341 | UCACCAC  |
| ENSG00000107341 | UCCCUUU  |
| ENSG00000107341 | UUGGCAA  |
| ENSG00000107341 | UUGGUUC  |
| ENSG00000107341 | UUUUUGC  |
| ENSG00000107362 | CCUUCAU  |
| ENSG00000107362 | GCAACUU  |
| ENSG00000107362 | UUUGCAA  |
| ENSG00000107372 | AACACUG  |
| ENSG00000107372 | AAGAACC  |
| ENSG00000107372 | AAGACAU  |
| ENSG00000107372 | AAUACUG  |
| ENSG00000107372 | AAUCCUU  |
| ENSG00000107372 | AAUGUUG  |
| ENSG00000107372 | ACAUUAC  |
| ENSG00000107372 | ACAUUCA  |
| ENSG00000107372 | ACCACAG  |
| ENSG00000107372 | ACCCUGU  |
| ENSG00000107372 | ACUGCAG  |
| ENSG00000107372 | ACUGCAU  |
| ENSG00000107372 | AGAUAAA  |
| ENSG00000107372 | AGUAGAC  |
| ENSG00000107372 | AGUGCAA  |
| ENSG00000107372 | AGUGCCG  |
| ENSG00000107372 | AGUGCCU  |
| ENSG00000107372 | AUAAUAC  |
| ENSG00000107372 | AUACCUC  |
| ENSG00000107372 | AUAU AAC |
| ENSG00000107372 | AUGUGCC  |
| ENSG00000107372 | CAAACU   |
| ENSG00000107372 | CAGUCUG  |
| ENSG00000107372 | CAGUUAC  |
| ENSG00000107372 | CCAUUAC  |
| ENSG00000107372 | CCCUGUU  |
| ENSG00000107372 | CCUGCUG  |
| ENSG00000107372 | CUCUUCC  |
| ENSG00000107372 | CUGCAGC  |
| ENSG00000107372 | CUGCAGG  |
| ENSG00000107372 | CUGCUCA  |
| ENSG00000107372 | CUUCACC  |
| ENSG00000107372 | CUUGUAU  |
| ENSG00000107372 | GACCCUG  |
| ENSG00000107372 | GAGCUGC  |
| ENSG00000107372 | GCAGAAG  |
| ENSG00000107372 | GCUGGAU  |
| ENSG00000107372 | GCUUCCU  |
| ENSG00000107372 | GGUAGAC  |
| ENSG00000107372 | GUAUGUU  |
| ENSG00000107372 | GUCUACU  |
| ENSG00000107372 | GUGCAAA  |

|                 |          |
|-----------------|----------|
| ENSG00000107372 | UACAGUU  |
| ENSG00000107372 | UCACAAG  |
| ENSG00000107372 | UCAUACA  |
| ENSG00000107372 | UCCUCU   |
| ENSG00000107372 | UCUUGAG  |
| ENSG00000107372 | UGAAAGG  |
| ENSG00000107372 | UGUAUGU  |
| ENSG00000107372 | UCCAUA   |
| ENSG00000107372 | UUGGCAA  |
| ENSG00000107372 | UUUGCAA  |
| ENSG00000107404 | AGCAGCU  |
| ENSG00000107404 | CUACAGU  |
| ENSG00000107443 | AAAGUGC  |
| ENSG00000107443 | ACAUUC   |
| ENSG00000107443 | AAGUGUG  |
| ENSG00000107443 | ACAGUAC  |
| ENSG00000107443 | ACUGUAG  |
| ENSG00000107443 | AGCCCUU  |
| ENSG00000107443 | CACAGUG  |
| ENSG00000107443 | CCAGUGC  |
| ENSG00000107443 | CCUGCUG  |
| ENSG00000107443 | CUUUGGU  |
| ENSG00000107443 | GAGGUAU  |
| ENSG00000107443 | GCAGCAU  |
| ENSG00000107443 | GGCAAGA  |
| ENSG00000107443 | GUAGUGU  |
| ENSG00000107443 | UAAUACA  |
| ENSG00000107443 | UCAUAGA  |
| ENSG00000107443 | UCCUGU   |
| ENSG00000107443 | UGCAUAG  |
| ENSG00000107443 | UUCAAGC  |
| ENSG00000107443 | UUGGCAC  |
| ENSG00000107443 | UUGGUUC  |
| ENSG00000107485 | AUGGCUU  |
| ENSG00000107485 | CCUUCAU  |
| ENSG00000107485 | UCACAGG  |
| ENSG00000107485 | UCACAGU  |
| ENSG00000107485 | UGUAUAA  |
| ENSG00000107518 | ACAAUUAU |
| ENSG00000107518 | ACAUUCA  |
| ENSG00000107518 | AGCAAAA  |
| ENSG00000107518 | AUGCAUU  |
| ENSG00000107518 | CACAAUG  |
| ENSG00000107518 | CUCCAUU  |
| ENSG00000107518 | GCAACUU  |
| ENSG00000107518 | GGCAUUG  |
| ENSG00000107518 | GUAAACA  |
| ENSG00000107518 | UAAUAUC  |
| ENSG00000107518 | UCCAUA   |
| ENSG00000107551 | GUAAACA  |
| ENSG00000107551 | UCAUUCG  |
| ENSG00000107554 | UAUAAAG  |
| ENSG00000107560 | ACAUUCA  |
| ENSG00000107560 | CAGCUGG  |
| ENSG00000107560 | CUGGAAA  |
| ENSG00000107560 | UCACAGG  |
| ENSG00000107560 | UCACAGU  |
| ENSG00000107560 | UCAUUCG  |
| ENSG00000107560 | UCUGGAA  |
| ENSG00000107560 | UGCAUAG  |
| ENSG00000107560 | UGCUGAC  |
| ENSG00000107562 | ACAAUAU  |
| ENSG00000107562 | ACAGUAC  |
| ENSG00000107562 | AUGAUGA  |

|                 |          |
|-----------------|----------|
| ENSG00000107562 | CUCAAAC  |
| ENSG00000107562 | GAAUUGU  |
| ENSG00000107562 | UCUCAAG  |
| ENSG00000107562 | UGCAAAG  |
| ENSG00000107566 | AAAUUUC  |
| ENSG00000107566 | AAUACUG  |
| ENSG00000107566 | CAA AUGC |
| ENSG00000107566 | CAGCUGG  |
| ENSG00000107566 | CAGUGCA  |
| ENSG00000107566 | CCAGUGU  |
| ENSG00000107566 | CCCUGUU  |
| ENSG00000107566 | CUUGGGC  |
| ENSG00000107566 | GAAAACA  |
| ENSG00000107566 | GCAGCAU  |
| ENSG00000107566 | UACAGUU  |
| ENSG00000107566 | UCAAGUA  |
| ENSG00000107566 | UCCCACA  |
| ENSG00000107566 | UCCCACC  |
| ENSG00000107566 | UGAUCCA  |
| ENSG00000107566 | UUGGCAA  |
| ENSG00000107581 | CUACAAA  |
| ENSG00000107614 | CAAAGUG  |
| ENSG00000107614 | UAAGACU  |
| ENSG00000107614 | UAUUACC  |
| ENSG00000107623 | AAAGU AU |
| ENSG00000107623 | ACAGUAC  |
| ENSG00000107623 | AUAUUAU  |
| ENSG00000107623 | UACAAAG  |
| ENSG00000107625 | UUCUUGU  |
| ENSG00000107625 | UUUGCAA  |
| ENSG00000107651 | GAGAACC  |
| ENSG00000107672 | AUCAUAC  |
| ENSG00000107672 | UCAUACA  |
| ENSG00000107679 | AGCACCA  |
| ENSG00000107679 | CUUUGGU  |
| ENSG00000107679 | GACCUG   |
| ENSG00000107719 | AGCUGCC  |
| ENSG00000107719 | AGUAGUU  |
| ENSG00000107719 | CAGUAGU  |
| ENSG00000107719 | GAGGU AU |
| ENSG00000107719 | UGCCAGC  |
| ENSG00000107731 | UCCUAG   |
| ENSG00000107736 | ACAUUCA  |
| ENSG00000107736 | GGAAGCC  |
| ENSG00000107738 | AAAUUUC  |
| ENSG00000107738 | AGCAGCA  |
| ENSG00000107738 | CAA AUGC |
| ENSG00000107738 | CAGCAGA  |
| ENSG00000107738 | CAGCUGG  |
| ENSG00000107738 | CCAGCAU  |
| ENSG00000107738 | GAAAACA  |
| ENSG00000107742 | AAAAAUC  |
| ENSG00000107742 | AACACUG  |
| ENSG00000107742 | AACAUUC  |
| ENSG00000107742 | AAGACAU  |
| ENSG00000107742 | AAGGCAC  |
| ENSG00000107742 | AAGUAGC  |
| ENSG00000107742 | ACAAGGU  |
| ENSG00000107742 | CAGGCUC  |
| ENSG00000107742 | CAGUUAC  |
| ENSG00000107742 | CCAGGAG  |
| ENSG00000107742 | UAUUGCU  |
| ENSG00000107742 | UCAAGUA  |
| ENSG00000107742 | UCUCAAG  |

|                 |          |
|-----------------|----------|
| ENSG00000107745 | UGCAAAG  |
| ENSG00000107758 | AUAUUAU  |
| ENSG00000107758 | GUAAACA  |
| ENSG00000107758 | UAAGACG  |
| ENSG00000107758 | UAAGACU  |
| ENSG00000107779 | AGCAGCA  |
| ENSG00000107779 | AGCAGCG  |
| ENSG00000107779 | AGCAGCU  |
| ENSG00000107779 | AGUACUG  |
| ENSG00000107779 | AUGGCUU  |
| ENSG00000107779 | CAGCAGA  |
| ENSG00000107779 | CUCCAUAU |
| ENSG00000107779 | GGCAGCG  |
| ENSG00000107779 | UCACAGG  |
| ENSG00000107779 | UCACAGU  |
| ENSG00000107779 | UCCCUUG  |
| ENSG00000107779 | UCUCCAA  |
| ENSG00000107796 | CACAGUG  |
| ENSG00000107807 | AAGUGCU  |
| ENSG00000107807 | CACAGUG  |
| ENSG00000107807 | GGUUACC  |
| ENSG00000107807 | UAUAAAAG |
| ENSG00000107815 | CUGGAAA  |
| ENSG00000107816 | GGGUUUA  |
| ENSG00000107816 | UUGGUCC  |
| ENSG00000107819 | GGAAGCC  |
| ENSG00000107829 | CUGGCUC  |
| ENSG00000107829 | UUCAAAU  |
| ENSG00000107831 | AAAAACC  |
| ENSG00000107854 | AAAGAAU  |
| ENSG00000107854 | AAAGCUG  |
| ENSG00000107854 | AAGUGCU  |
| ENSG00000107854 | AGUGCUG  |
| ENSG00000107854 | CAAAGCA  |
| ENSG00000107854 | GAAAACA  |
| ENSG00000107854 | UCAAGUA  |
| ENSG00000107854 | UCUGGAA  |
| ENSG00000107859 | CCUGUU   |
| ENSG00000107859 | UCCGCGC  |
| ENSG00000107862 | AAAGUGC  |
| ENSG00000107862 | AAGUGCA  |
| ENSG00000107862 | CAAAGUG  |
| ENSG00000107862 | GGAGGAG  |
| ENSG00000107863 | AAAAAUC  |
| ENSG00000107863 | AAGUCAC  |
| ENSG00000107863 | ACAAUAU  |
| ENSG00000107863 | CCAGUGC  |
| ENSG00000107863 | CUGGCUC  |
| ENSG00000107863 | GAGGCAG  |
| ENSG00000107863 | GCAGAAG  |
| ENSG00000107863 | GGAAUGU  |
| ENSG00000107863 | UCAAGUA  |
| ENSG00000107863 | UCCAGUU  |
| ENSG00000107864 | AAAAGUA  |
| ENSG00000107864 | AAACUGU  |
| ENSG00000107864 | AAAGAGG  |
| ENSG00000107864 | AAAGGUA  |
| ENSG00000107864 | AAAGUGC  |
| ENSG00000107864 | AAGUCUU  |
| ENSG00000107864 | AAGUGCU  |
| ENSG00000107864 | ACAGUAU  |
| ENSG00000107864 | ACAUCAC  |
| ENSG00000107864 | ACUGGAU  |
| ENSG00000107864 | AGCACCA  |

|                 |          |
|-----------------|----------|
| ENSG00000107864 | AGCAGCG  |
| ENSG00000107864 | AGCAGCU  |
| ENSG00000107864 | AUACAAG  |
| ENSG00000107864 | AUGAGCU  |
| ENSG00000107864 | CACAGUG  |
| ENSG00000107864 | CACUCCU  |
| ENSG00000107864 | CAGUAGA  |
| ENSG00000107864 | CCAGCAU  |
| ENSG00000107864 | CUGCAGC  |
| ENSG00000107864 | GAGGUAG  |
| ENSG00000107864 | GAUUGUC  |
| ENSG00000107864 | GUGCAA   |
| ENSG00000107864 | UAUAAAAG |
| ENSG00000107864 | UAUUGCU  |
| ENSG00000107864 | UCAAGUA  |
| ENSG00000107864 | UCACAGU  |
| ENSG00000107864 | UGACUGU  |
| ENSG00000107864 | UGAGAAU  |
| ENSG00000107864 | UGCAAAG  |
| ENSG00000107864 | UGCAGCU  |
| ENSG00000107864 | UUAUGCA  |
| ENSG00000107864 | UUCUAG   |
| ENSG00000107864 | UUCUAAU  |
| ENSG00000107864 | UUGAUCA  |
| ENSG00000107864 | UUUGCAA  |
| ENSG00000107872 | CAGUCCA  |
| ENSG00000107872 | UGAAGCU  |
| ENSG00000107874 | UCCUCU   |
| ENSG00000107882 | AAGUCAC  |
| ENSG00000107882 | AGGCAGG  |
| ENSG00000107882 | AUGGCUU  |
| ENSG00000107882 | CAGGAAC  |
| ENSG00000107882 | CUCUAGC  |
| ENSG00000107882 | CUGCAGC  |
| ENSG00000107882 | CUGCAGG  |
| ENSG00000107882 | CUUACAG  |
| ENSG00000107882 | GAAGGAA  |
| ENSG00000107882 | GAAUUGU  |
| ENSG00000107882 | GAGACCU  |
| ENSG00000107882 | GAGGCUG  |
| ENSG00000107882 | GCAGCAU  |
| ENSG00000107882 | GGCAGGG  |
| ENSG00000107882 | UAAUGCU  |
| ENSG00000107882 | UACAAAG  |
| ENSG00000107897 | AAAGUGC  |
| ENSG00000107897 | AACUACU  |
| ENSG00000107897 | AAGUGCU  |
| ENSG00000107897 | AGUGCUU  |
| ENSG00000107897 | GUAGUGU  |
| ENSG00000107897 | UGCAAAG  |
| ENSG00000107897 | UUUCAAC  |
| ENSG00000107937 | CAAAGCA  |
| ENSG00000107938 | AAGGCAC  |
| ENSG00000107938 | CACAGUG  |
| ENSG00000107938 | UCACAGG  |
| ENSG00000107938 | UUCAAGC  |
| ENSG00000107954 | CACAAUG  |
| ENSG00000107954 | CUGCAGC  |
| ENSG00000107954 | UCACAAG  |
| ENSG00000107957 | AAAAAUC  |
| ENSG00000107957 | AAAAGUA  |
| ENSG00000107957 | AAAGUUA  |
| ENSG00000107957 | AAAGUUU  |
| ENSG00000107957 | AAAUUUC  |

|                 |         |
|-----------------|---------|
| ENSG00000107957 | AAUACUG |
| ENSG00000107957 | ACAGUAC |
| ENSG00000107957 | ACAGUAU |
| ENSG00000107957 | ACUGCAG |
| ENSG00000107957 | AGCAGCU |
| ENSG00000107957 | AGCUGCC |
| ENSG00000107957 | AGUAACA |
| ENSG00000107957 | AGUACUG |
| ENSG00000107957 | AUAUAAC |
| ENSG00000107957 | AUGCACC |
| ENSG00000107957 | AUGCCUU |
| ENSG00000107957 | AUGUGCC |
| ENSG00000107957 | CACAAUG |
| ENSG00000107957 | CAGCAGA |
| ENSG00000107957 | CAGCUGG |
| ENSG00000107957 | CAGUAGA |
| ENSG00000107957 | CAGUAGU |
| ENSG00000107957 | CAGUGCA |
| ENSG00000107957 | CCAGCAU |
| ENSG00000107957 | CCAGUGU |
| ENSG00000107957 | CCUUCUU |
| ENSG00000107957 | CUAGUAA |
| ENSG00000107957 | CUGGCUC |
| ENSG00000107957 | CUUUGGU |
| ENSG00000107957 | GAGAAAU |
| ENSG00000107957 | GAGAUGA |
| ENSG00000107957 | GCAGAAG |
| ENSG00000107957 | GCUGGAU |
| ENSG00000107957 | GGAAGCC |
| ENSG00000107957 | GGACCUG |
| ENSG00000107957 | GGCUCAG |
| ENSG00000107957 | GGGUGGU |
| ENSG00000107957 | GUCCAGA |
| ENSG00000107957 | GUGAAUG |
| ENSG00000107957 | GUGGCCC |
| ENSG00000107957 | GUUAAUG |
| ENSG00000107957 | UAAUACA |
| ENSG00000107957 | UAAUGCU |
| ENSG00000107957 | UACAGUU |
| ENSG00000107957 | UCAAGUA |
| ENSG00000107957 | UCACAUU |
| ENSG00000107957 | UGAGAAG |
| ENSG00000107957 | UUCAAAU |
| ENSG00000107957 | UUCCAUU |
| ENSG00000107957 | UUCCUCG |
| ENSG00000107968 | AAAGUGC |
| ENSG00000107968 | AAGUGCA |
| ENSG00000107968 | CAAAGUG |
| ENSG00000107968 | GAGAAAU |
| ENSG00000107984 | AAAGAAU |
| ENSG00000107984 | AAGUGCA |
| ENSG00000107984 | AAGUGCU |
| ENSG00000107984 | ACUCCAG |
| ENSG00000107984 | ACUGCAG |
| ENSG00000107984 | ACUGCAU |
| ENSG00000107984 | GCAGCAU |
| ENSG00000107984 | GUGCCAC |
| ENSG00000108001 | AAAUGGU |
| ENSG00000108001 | AACAAAC |
| ENSG00000108001 | AACUACU |
| ENSG00000108001 | AAGGCAC |
| ENSG00000108001 | AAUGUUG |
| ENSG00000108001 | AGCAAAA |
| ENSG00000108001 | AGUGUGC |

|                 |         |
|-----------------|---------|
| ENSG00000108001 | AUACAAG |
| ENSG00000108001 | AUGUGGG |
| ENSG00000108001 | CACCACC |
| ENSG00000108001 | CAGACAG |
| ENSG00000108001 | CAGCAGA |
| ENSG00000108001 | CUAUACA |
| ENSG00000108001 | CUCUAGC |
| ENSG00000108001 | GAAACAU |
| ENSG00000108001 | GAAUUGU |
| ENSG00000108001 | GGCAAGA |
| ENSG00000108001 | GGCUCAG |
| ENSG00000108001 | GGGUCUU |
| ENSG00000108001 | GUAAACA |
| ENSG00000108001 | GUCAGUU |
| ENSG00000108001 | GUUAAUG |
| ENSG00000108001 | UAGGCCG |
| ENSG00000108001 | UCACAGG |
| ENSG00000108001 | UCACCAC |
| ENSG00000108001 | UGUAUAA |
| ENSG00000108001 | UUGUUCG |
| ENSG00000108001 | UUUGCAA |
| ENSG00000108018 | AAAAAUC |
| ENSG00000108018 | AAAGCUG |
| ENSG00000108018 | AACAAAC |
| ENSG00000108018 | AAGGCAC |
| ENSG00000108018 | ACAUCAC |
| ENSG00000108018 | ACUGGCC |
| ENSG00000108018 | ACUGGCU |
| ENSG00000108018 | AGCUGCC |
| ENSG00000108018 | AGUAGUU |
| ENSG00000108018 | CAAAGCA |
| ENSG00000108018 | CAAAGUG |
| ENSG00000108018 | CACUCCU |
| ENSG00000108018 | CCAUUAC |
| ENSG00000108018 | CCUGUAC |
| ENSG00000108018 | CUCAGGG |
| ENSG00000108018 | CUGGAAA |
| ENSG00000108018 | GAAAACA |
| ENSG00000108018 | GAGAAGA |
| ENSG00000108018 | GAGUGUG |
| ENSG00000108018 | GAUCAGA |
| ENSG00000108018 | GCUUCCU |
| ENSG00000108018 | GGAAGCC |
| ENSG00000108018 | UCCUGU  |
| ENSG00000108018 | UCCUUGC |
| ENSG00000108018 | UGUCUGC |
| ENSG00000108018 | UGUCUGG |
| ENSG00000108018 | UGUGUCA |
| ENSG00000108021 | AGCAAAA |
| ENSG00000108021 | AUCAUAC |
| ENSG00000108039 | ACCUUGA |
| ENSG00000108039 | AGCACCA |
| ENSG00000108039 | CCUUCUG |
| ENSG00000108061 | AAAGUGC |
| ENSG00000108061 | AAGUGCA |
| ENSG00000108061 | ACAUUCA |
| ENSG00000108061 | GCAACUU |
| ENSG00000108064 | AGUAGUU |
| ENSG00000108064 | AUGCAUU |
| ENSG00000108091 | AAGGCAC |
| ENSG00000108091 | AAGUCAC |
| ENSG00000108091 | AAGUCUU |
| ENSG00000108091 | AAUCACU |
| ENSG00000108091 | ACAGGUG |



|                 |          |
|-----------------|----------|
| ENSG00000108091 | ACAUUCA  |
| ENSG00000108091 | ACUGGCU  |
| ENSG00000108091 | AGCAAAA  |
| ENSG00000108091 | AGCAGCG  |
| ENSG00000108091 | AGCAGCU  |
| ENSG00000108091 | AGGGUCU  |
| ENSG00000108091 | AGUGCAA  |
| ENSG00000108091 | AUAU AAC |
| ENSG00000108091 | AUGCAUU  |
| ENSG00000108091 | CAAAGUG  |
| ENSG00000108091 | CACAGUG  |
| ENSG00000108091 | CAGCAGA  |
| ENSG00000108091 | CCUUCUG  |
| ENSG00000108091 | CUACAAA  |
| ENSG00000108091 | CUAGUAA  |
| ENSG00000108091 | CUAGUAG  |
| ENSG00000108091 | CUGGCUC  |
| ENSG00000108091 | GAAGGAA  |
| ENSG00000108091 | GAGUGUG  |
| ENSG00000108091 | GCAGCAU  |
| ENSG00000108091 | GGAAGCC  |
| ENSG00000108091 | GGAGUGU  |
| ENSG00000108091 | GGCUGCG  |
| ENSG00000108091 | GGUUGUC  |
| ENSG00000108091 | GUAAACA  |
| ENSG00000108091 | GUCUCUG  |
| ENSG00000108091 | GUGCAA   |
| ENSG00000108091 | UAUAAAAG |
| ENSG00000108091 | UCCCUUU  |
| ENSG00000108091 | UGAAGCU  |
| ENSG00000108091 | UGCAAAG  |
| ENSG00000108091 | UGGCUGC  |
| ENSG00000108091 | UUAGAGA  |
| ENSG00000108091 | UUUCAAC  |
| ENSG00000108094 | AAUUAUU  |
| ENSG00000108094 | ACACACC  |
| ENSG00000108094 | ACAUUAC  |
| ENSG00000108094 | ACGCUCA  |
| ENSG00000108094 | CAGCAGA  |
| ENSG00000108094 | GUAAACA  |
| ENSG00000108100 | AAGGCAC  |
| ENSG00000108100 | UAUUGCU  |
| ENSG00000108106 | UUAGAGA  |
| ENSG00000108107 | UAUUGCU  |
| ENSG00000108175 | AAAAAUC  |
| ENSG00000108175 | AAAGCUG  |
| ENSG00000108175 | AAAGUAA  |
| ENSG00000108175 | AAAGUAC  |
| ENSG00000108175 | AAAUCCC  |
| ENSG00000108175 | AACUACU  |
| ENSG00000108175 | AAUGUUG  |
| ENSG00000108175 | ACCAGCA  |
| ENSG00000108175 | AGCACCA  |
| ENSG00000108175 | AUACAAG  |
| ENSG00000108175 | AUACCUC  |
| ENSG00000108175 | AUAUU AU |
| ENSG00000108175 | CACAAUG  |
| ENSG00000108175 | CACCAGC  |
| ENSG00000108175 | CAGCAA   |
| ENSG00000108175 | CUCUGGG  |
| ENSG00000108175 | CUUGGAG  |
| ENSG00000108175 | GCUGGUG  |
| ENSG00000108175 | GGAAGAC  |
| ENSG00000108175 | GGUUACC  |

|                 |         |
|-----------------|---------|
| ENSG00000108175 | GGUUGUC |
| ENSG00000108175 | GUGCUUG |
| ENSG00000108175 | UCACAAG |
| ENSG00000108175 | UCAUGAU |
| ENSG00000108175 | UCCCUUG |
| ENSG00000108175 | UGAAAUG |
| ENSG00000108175 | UGAAGCU |
| ENSG00000108175 | UGAGUCU |
| ENSG00000108175 | UGCAUAG |
| ENSG00000108175 | UGCAUUA |
| ENSG00000108175 | UGUGCUU |
| ENSG00000108175 | UGUUGAA |
| ENSG00000108175 | UCCCAUA |
| ENSG00000108175 | UUGAUCA |
| ENSG00000108175 | UUGGUUC |
| ENSG00000108175 | UUUGCAA |
| ENSG00000108176 | AAUUAUU |
| ENSG00000108179 | AAGGCAC |
| ENSG00000108179 | ACUCAGG |
| ENSG00000108179 | AGCAGCA |
| ENSG00000108179 | CACAGUG |
| ENSG00000108179 | UCACAGG |
| ENSG00000108179 | UCACAGU |
| ENSG00000108187 | CAAAACU |
| ENSG00000108219 | ACCAGCA |
| ENSG00000108219 | AGCAUUC |
| ENSG00000108219 | AUAAAGU |
| ENSG00000108219 | CAGUAGA |
| ENSG00000108219 | CAGUAGU |
| ENSG00000108219 | CCCUGAG |
| ENSG00000108219 | GUCUCUG |
| ENSG00000108219 | UAAUGCU |
| ENSG00000108219 | UAUAAAG |
| ENSG00000108219 | UUGGCAA |
| ENSG00000108219 | UUGGCAC |
| ENSG00000108231 | AAAAGUA |
| ENSG00000108231 | AUGCAUU |
| ENSG00000108231 | GGCAGUG |
| ENSG00000108231 | UUGGCAA |
| ENSG00000108231 | UUGGCAC |
| ENSG00000108239 | AAAGAGG |
| ENSG00000108239 | AAAGGUA |
| ENSG00000108239 | AAAGUAA |
| ENSG00000108239 | AAGUCUU |
| ENSG00000108239 | AAGUGCA |
| ENSG00000108239 | AGUGGUU |
| ENSG00000108239 | AUUCAUU |
| ENSG00000108239 | AUUGCAC |
| ENSG00000108239 | GAGGCAG |
| ENSG00000108239 | GUGCAAA |
| ENSG00000108239 | GUGCUUG |
| ENSG00000108239 | UAAUACA |
| ENSG00000108239 | UAUUGCU |
| ENSG00000108239 | UCAUUUG |
| ENSG00000108239 | UCCAGUU |
| ENSG00000108239 | UGCAAAG |
| ENSG00000108239 | UGCAUUG |
| ENSG00000108239 | UGUGCUU |
| ENSG00000108239 | UUAUGCA |
| ENSG00000108239 | UUCAAGC |
| ENSG00000108256 | AAAGUGC |
| ENSG00000108256 | AAGGCAC |
| ENSG00000108256 | AAGGCGC |
| ENSG00000108256 | AAGGUGC |

|                 |         |
|-----------------|---------|
| ENSG00000108256 | AAGUCAC |
| ENSG00000108256 | AAGUGCA |
| ENSG00000108256 | AAGUGCU |
| ENSG00000108256 | AAUACUG |
| ENSG00000108256 | ACAGUAC |
| ENSG00000108256 | ACAGUAU |
| ENSG00000108256 | ACAUUCA |
| ENSG00000108256 | ACUGCAU |
| ENSG00000108256 | ACUGGCC |
| ENSG00000108256 | ACUGGCU |
| ENSG00000108256 | AGCACCA |
| ENSG00000108256 | AGCAGCA |
| ENSG00000108256 | AGCAGCG |
| ENSG00000108256 | AGCAGCU |
| ENSG00000108256 | AGGCAGG |
| ENSG00000108256 | AGUGGUU |
| ENSG00000108256 | AGUGUGC |
| ENSG00000108256 | AUACCUC |
| ENSG00000108256 | AUGCAUU |
| ENSG00000108256 | AUGGCAC |
| ENSG00000108256 | AUUGCAC |
| ENSG00000108256 | CAAAACU |
| ENSG00000108256 | CAGCAGA |
| ENSG00000108256 | CAGGAAC |
| ENSG00000108256 | CAGUAGU |
| ENSG00000108256 | CAGUCUG |
| ENSG00000108256 | CCAGUGU |
| ENSG00000108256 | CCUGCUG |
| ENSG00000108256 | CUGGACU |
| ENSG00000108256 | CUUCACC |
| ENSG00000108256 | CUUCUCU |
| ENSG00000108256 | CUUGUGU |
| ENSG00000108256 | GAAUUGU |
| ENSG00000108256 | GAGUGUG |
| ENSG00000108256 | GAGUUGA |
| ENSG00000108256 | GAGUUGG |
| ENSG00000108256 | GCAGAAG |
| ENSG00000108256 | GCAGCAU |
| ENSG00000108256 | GCUACAU |
| ENSG00000108256 | GGACUGC |
| ENSG00000108256 | GGCGACA |
| ENSG00000108256 | GGUUUAC |
| ENSG00000108256 | GUAAACA |
| ENSG00000108256 | GUAUUCU |
| ENSG00000108256 | GUGAGGU |
| ENSG00000108256 | GUGCAA  |
| ENSG00000108256 | GUGCUUG |
| ENSG00000108256 | UAAUGCU |
| ENSG00000108256 | UACAGUU |
| ENSG00000108256 | UAGACUG |
| ENSG00000108256 | UAGUGAG |
| ENSG00000108256 | UCAACAG |
| ENSG00000108256 | UCUGGAA |
| ENSG00000108256 | UCUGGAG |
| ENSG00000108256 | UGAGGAC |
| ENSG00000108256 | UGCAUAG |
| ENSG00000108256 | UGGACUG |
| ENSG00000108256 | UGGCCCU |
| ENSG00000108256 | UGUGUGG |
| ENSG00000108256 | UGUUGAA |
| ENSG00000108256 | UUAUGCA |
| ENSG00000108256 | UUGGCAA |
| ENSG00000108256 | UUGGCAC |
| ENSG00000108256 | UUGGUUC |

|                 |         |
|-----------------|---------|
| ENSG00000108256 | UUGUGUC |
| ENSG00000108256 | UUGUUCG |
| ENSG00000108256 | UUUGCAA |
| ENSG00000108262 | ACUGGCU |
| ENSG00000108262 | AGCAGCA |
| ENSG00000108262 | AGGCAGG |
| ENSG00000108262 | AGUGGUU |
| ENSG00000108262 | AUGACAC |
| ENSG00000108262 | AUGUGGG |
| ENSG00000108262 | CACCACC |
| ENSG00000108262 | CAGGCUC |
| ENSG00000108262 | CAGUUAC |
| ENSG00000108262 | CAUGGGU |
| ENSG00000108262 | CCAGUGC |
| ENSG00000108262 | CCCACCU |
| ENSG00000108262 | CUCCAGC |
| ENSG00000108262 | CUGGCUC |
| ENSG00000108262 | GCUGGUG |
| ENSG00000108262 | GGAAUGU |
| ENSG00000108262 | GGAGUGU |
| ENSG00000108262 | GGGGAGC |
| ENSG00000108262 | GUGAGGU |
| ENSG00000108262 | GUGGCC  |
| ENSG00000108262 | UCCAGUU |
| ENSG00000108262 | UCUGGAG |
| ENSG00000108262 | UGGCUGC |
| ENSG00000108262 | UGGGGGA |
| ENSG00000108262 | UGUCUGG |
| ENSG00000108292 | AAAAACC |
| ENSG00000108292 | AAAGUGC |
| ENSG00000108292 | AACAUUC |
| ENSG00000108292 | AAGUCUU |
| ENSG00000108292 | AGCAGCA |
| ENSG00000108292 | AGCCCUU |
| ENSG00000108292 | AGGGUCU |
| ENSG00000108292 | AGUACUG |
| ENSG00000108292 | AGUGCAA |
| ENSG00000108292 | AGUGCCU |
| ENSG00000108292 | AUAUUAU |
| ENSG00000108292 | AUGCACC |
| ENSG00000108292 | CACUCCU |
| ENSG00000108292 | CAGUAGA |
| ENSG00000108292 | CAGUAGU |
| ENSG00000108292 | CAGUGCA |
| ENSG00000108292 | CCAGUGC |
| ENSG00000108292 | CUCACAC |
| ENSG00000108292 | CUCCAGC |
| ENSG00000108292 | CUUGGAG |
| ENSG00000108292 | GAGCUAA |
| ENSG00000108292 | GAGUAUU |
| ENSG00000108292 | GCAACUU |
| ENSG00000108292 | GCCCUUA |
| ENSG00000108292 | GCUACAU |
| ENSG00000108292 | GCUGGUG |
| ENSG00000108292 | GGGCCCC |
| ENSG00000108292 | GGGGCAG |
| ENSG00000108292 | GGUGGGC |
| ENSG00000108292 | GUCAUUG |
| ENSG00000108292 | GUGCAA  |
| ENSG00000108292 | UAAUAUC |
| ENSG00000108292 | UAUCAGA |
| ENSG00000108292 | UCAACAG |
| ENSG00000108292 | UCUCCAA |
| ENSG00000108292 | UGGGUGA |

|                 |         |
|-----------------|---------|
| ENSG00000108292 | UUAUGCA |
| ENSG00000108292 | UUGGAGG |
| ENSG00000108309 | CAGUCUG |
| ENSG00000108309 | UCACAGU |
| ENSG00000108312 | AAGUGCA |
| ENSG00000108312 | ACUGUAG |
| ENSG00000108312 | AUAUAAC |
| ENSG00000108312 | CCAGUGC |
| ENSG00000108312 | CCUGCUG |
| ENSG00000108312 | CUACAAA |
| ENSG00000108312 | CUCCAC  |
| ENSG00000108312 | CUGCAGG |
| ENSG00000108312 | CUGCCC  |
| ENSG00000108312 | CUUACAG |
| ENSG00000108312 | GAAAACA |
| ENSG00000108312 | GACAACU |
| ENSG00000108312 | GAGAAAU |
| ENSG00000108312 | GCAGAAG |
| ENSG00000108312 | GCCUGGG |
| ENSG00000108312 | GGCAGGG |
| ENSG00000108312 | GGGGGAA |
| ENSG00000108312 | GGUGGGC |
| ENSG00000108312 | GGUUGUC |
| ENSG00000108312 | UCAAGUA |
| ENSG00000108312 | UCCAGUU |
| ENSG00000108342 | AACACUG |
| ENSG00000108342 | ACUUGGA |
| ENSG00000108342 | AGAUAAA |
| ENSG00000108342 | CCCACGU |
| ENSG00000108344 | GACCCUG |
| ENSG00000108344 | GAGAACU |
| ENSG00000108349 | AAGGCAC |
| ENSG00000108349 | AAGUCAC |
| ENSG00000108349 | AAUUUUA |
| ENSG00000108349 | ACAUUAC |
| ENSG00000108349 | AUGCAUU |
| ENSG00000108349 | CACACCU |
| ENSG00000108349 | CCCCUGG |
| ENSG00000108349 | CUACAAA |
| ENSG00000108349 | GACAACU |
| ENSG00000108349 | GAGGCAG |
| ENSG00000108349 | UCACAGU |
| ENSG00000108349 | UGCAUUG |
| ENSG00000108349 | UUGGUCC |
| ENSG00000108352 | AAAGCUG |
| ENSG00000108352 | AAAGUGC |
| ENSG00000108352 | AAGUGCU |
| ENSG00000108352 | ACAAGGU |
| ENSG00000108352 | AGCACCA |
| ENSG00000108352 | AGCUGCC |
| ENSG00000108352 | AGUGCUU |
| ENSG00000108352 | AUACAAG |
| ENSG00000108352 | CCCACCU |
| ENSG00000108352 | CCCUGAG |
| ENSG00000108352 | CUCCAC  |
| ENSG00000108352 | GCCUGGG |
| ENSG00000108352 | GGGGUGG |
| ENSG00000108352 | GUGCAAA |
| ENSG00000108352 | GUGCUUG |
| ENSG00000108352 | UCCACC  |
| ENSG00000108352 | UCCUGU  |
| ENSG00000108352 | UGCAAAG |
| ENSG00000108352 | UGUAUAA |
| ENSG00000108370 | AAGGCAC |

|                 |          |
|-----------------|----------|
| ENSG00000108375 | ACAUUCA  |
| ENSG00000108375 | AGCAAAA  |
| ENSG00000108375 | AGCAGCA  |
| ENSG00000108375 | AGUGCCG  |
| ENSG00000108375 | AUAUUUAU |
| ENSG00000108375 | AUGGCUU  |
| ENSG00000108375 | AUGUGGG  |
| ENSG00000108375 | UCACAUU  |
| ENSG00000108375 | UGGAUAA  |
| ENSG00000108375 | UGUCUGG  |
| ENSG00000108375 | UUCAAGC  |
| ENSG00000108379 | ACACACC  |
| ENSG00000108379 | CCCCUGG  |
| ENSG00000108379 | CUUCACC  |
| ENSG00000108379 | UCCAGAG  |
| ENSG00000108379 | UGCAAAG  |
| ENSG00000108387 | AAGGCGC  |
| ENSG00000108387 | GUCUCUG  |
| ENSG00000108387 | UGAGUCU  |
| ENSG00000108387 | UUCCUCG  |
| ENSG00000108389 | AGCACCA  |
| ENSG00000108389 | AGCAGCA  |
| ENSG00000108389 | GCAGCAU  |
| ENSG00000108389 | UAUUGCU  |
| ENSG00000108389 | UCACAGU  |
| ENSG00000108395 | AACAAAC  |
| ENSG00000108395 | AGCAGCA  |
| ENSG00000108395 | AGCAGCG  |
| ENSG00000108395 | UUGGCAC  |
| ENSG00000108405 | GAGGUAG  |
| ENSG00000108406 | AAAAAUC  |
| ENSG00000108406 | ACAAUUAU |
| ENSG00000108406 | AUACAAG  |
| ENSG00000108406 | CAAAGCA  |
| ENSG00000108406 | CUUUGGU  |
| ENSG00000108406 | GUAAACA  |
| ENSG00000108406 | GUUAAUG  |
| ENSG00000108406 | UAUAAAAG |
| ENSG00000108406 | UAUUGCU  |
| ENSG00000108406 | UCCUGAG  |
| ENSG00000108423 | GACAACU  |
| ENSG00000108423 | UUGACAC  |
| ENSG00000108424 | AACAUUC  |
| ENSG00000108424 | AAGGCGC  |
| ENSG00000108424 | ACACACU  |
| ENSG00000108424 | CACUCCU  |
| ENSG00000108424 | CCAGUGC  |
| ENSG00000108424 | CCAGUGU  |
| ENSG00000108424 | CUUUGGU  |
| ENSG00000108424 | GGUGGGC  |
| ENSG00000108424 | UCACACA  |
| ENSG00000108424 | UCCAGUU  |
| ENSG00000108424 | UGAAAUG  |
| ENSG00000108424 | UUGGCAA  |
| ENSG00000108424 | UUUGCAA  |
| ENSG00000108433 | AAUGUUG  |
| ENSG00000108433 | AGAUAAA  |
| ENSG00000108433 | CACAGGG  |
| ENSG00000108433 | CAGCAGG  |
| ENSG00000108433 | CUCACAC  |
| ENSG00000108433 | GAAACAU  |
| ENSG00000108433 | UCACAGG  |
| ENSG00000108433 | UCUCACC  |
| ENSG00000108433 | UGACAUC  |

|                 |         |
|-----------------|---------|
| ENSG00000108439 | CAGCAA  |
| ENSG00000108439 | CUGGCUC |
| ENSG00000108439 | UAUUACC |
| ENSG00000108443 | AAGGCAC |
| ENSG00000108443 | AUGAGCU |
| ENSG00000108443 | AUGGCUU |
| ENSG00000108443 | CACAGUG |
| ENSG00000108443 | CACCAGC |
| ENSG00000108443 | GGAAGAC |
| ENSG00000108443 | UCACAGU |
| ENSG00000108443 | UGCAGCU |
| ENSG00000108443 | UGCAUAG |
| ENSG00000108468 | AAAAAUC |
| ENSG00000108468 | AACACUG |
| ENSG00000108468 | AAGACAU |
| ENSG00000108468 | ACACACC |
| ENSG00000108468 | ACACACU |
| ENSG00000108468 | AGCACCA |
| ENSG00000108468 | CUGCAGG |
| ENSG00000108468 | CUGGACU |
| ENSG00000108468 | CUGGCUC |
| ENSG00000108468 | CUUCUCU |
| ENSG00000108468 | GUGACAG |
| ENSG00000108468 | UAAGACG |
| ENSG00000108468 | UAAGACU |
| ENSG00000108468 | UCUCAAG |
| ENSG00000108468 | UCUGGAA |
| ENSG00000108468 | UCUGGAG |
| ENSG00000108468 | UGGAGAU |
| ENSG00000108468 | UGUGCUU |
| ENSG00000108506 | AAUUAUU |
| ENSG00000108506 | GCAGGUU |
| ENSG00000108506 | UAUUGCU |
| ENSG00000108509 | AAAGUGC |
| ENSG00000108509 | AAGGCAC |
| ENSG00000108509 | ACAUUCA |
| ENSG00000108509 | AUGUGGG |
| ENSG00000108509 | UCUGGAG |
| ENSG00000108509 | UGUAUGU |
| ENSG00000108510 | AAACUGU |
| ENSG00000108510 | AAGACAU |
| ENSG00000108510 | AAUUGCU |
| ENSG00000108510 | AGGGAGG |
| ENSG00000108510 | AUACAAG |
| ENSG00000108510 | GAGAACC |
| ENSG00000108510 | GAGGAUA |
| ENSG00000108510 | GUGCAA  |
| ENSG00000108510 | UAAGACU |
| ENSG00000108510 | UAAUACA |
| ENSG00000108510 | UACAAAG |
| ENSG00000108510 | UCACAGU |
| ENSG00000108510 | UCAUACA |
| ENSG00000108510 | UUGUUCG |
| ENSG00000108511 | AAGACAU |
| ENSG00000108511 | CCAGUGC |
| ENSG00000108511 | CCAGUGU |
| ENSG00000108511 | CUACAAA |
| ENSG00000108511 | GAGCUAA |
| ENSG00000108511 | GAGUCUU |
| ENSG00000108511 | GCUUCCU |
| ENSG00000108511 | GUCCAGA |
| ENSG00000108511 | UCCAGUU |
| ENSG00000108518 | AAAAACC |
| ENSG00000108518 | CCCCCAG |

|                 |         |
|-----------------|---------|
| ENSG00000108518 | GGCAGCG |
| ENSG00000108518 | UUGGCAA |
| ENSG00000108518 | UUGGCAC |
| ENSG00000108551 | AAGUGCA |
| ENSG00000108551 | AAUGCCC |
| ENSG00000108551 | AGUGCAA |
| ENSG00000108556 | AGCAGCA |
| ENSG00000108556 | AGUGUGC |
| ENSG00000108556 | GUAGUGU |
| ENSG00000108556 | GUUAAUG |
| ENSG00000108557 | AACAUUC |
| ENSG00000108557 | AAGAACC |
| ENSG00000108557 | ACAUUCA |
| ENSG00000108557 | AGGACAC |
| ENSG00000108557 | UAAUACA |
| ENSG00000108557 | UAUAAUA |
| ENSG00000108557 | UGAGGAC |
| ENSG00000108578 | AAAGAAU |
| ENSG00000108578 | AAAGUUU |
| ENSG00000108578 | GCACCAU |
| ENSG00000108578 | GCAGCAU |
| ENSG00000108582 | ACAUUCA |
| ENSG00000108582 | ACUCCAG |
| ENSG00000108582 | AGUGCUU |
| ENSG00000108582 | AUGGCUU |
| ENSG00000108582 | CACAGUG |
| ENSG00000108582 | CAGUAGU |
| ENSG00000108582 | CAGUGCA |
| ENSG00000108582 | CCAUUAC |
| ENSG00000108582 | CUAGUAA |
| ENSG00000108582 | CUCCAUI |
| ENSG00000108582 | GAGGUAG |
| ENSG00000108582 | GGGUUUA |
| ENSG00000108582 | UAAUACA |
| ENSG00000108582 | UCACAGG |
| ENSG00000108582 | UCACAGU |
| ENSG00000108582 | UCUGGAG |
| ENSG00000108587 | AAGUGCA |
| ENSG00000108587 | ACAAUAI |
| ENSG00000108587 | CAAUUGC |
| ENSG00000108587 | CCAGUGU |
| ENSG00000108587 | CUCACAC |
| ENSG00000108587 | CUCCAC  |
| ENSG00000108587 | GAGAACC |
| ENSG00000108587 | GGCAUUG |
| ENSG00000108587 | GUCACUC |
| ENSG00000108587 | UAUAAAG |
| ENSG00000108587 | UCACACA |
| ENSG00000108587 | UUCUGCA |
| ENSG00000108588 | UAUUGCU |
| ENSG00000108604 | ACCAGCA |
| ENSG00000108604 | CCCUGAG |
| ENSG00000108604 | CCUGUAC |
| ENSG00000108604 | GAGAUGA |
| ENSG00000108604 | GUAAACA |
| ENSG00000108604 | GUGCAAA |
| ENSG00000108604 | UGCAUAI |
| ENSG00000108639 | AAAGCUG |
| ENSG00000108639 | GGGUGUU |
| ENSG00000108639 | UCUCCAA |
| ENSG00000108654 | AAAGUGC |
| ENSG00000108654 | AACACUG |
| ENSG00000108654 | AAGUGCA |
| ENSG00000108654 | AAUCACU |



|                 |          |
|-----------------|----------|
| ENSG00000108654 | ACAAUUAU |
| ENSG00000108654 | ACUGCAG  |
| ENSG00000108654 | CAGGAAC  |
| ENSG00000108654 | UAUAAAAG |
| ENSG00000108684 | AGAUGUG  |
| ENSG00000108684 | CCCACCU  |
| ENSG00000108684 | CUUGGGC  |
| ENSG00000108684 | GGGUCUU  |
| ENSG00000108684 | UAAUAUC  |
| ENSG00000108684 | UGCAUAG  |
| ENSG00000108688 | GAGGUAU  |
| ENSG00000108733 | UGAGAAG  |
| ENSG00000108753 | AAUACUG  |
| ENSG00000108753 | ACUGCAG  |
| ENSG00000108753 | AGUAACA  |
| ENSG00000108753 | AUUGCAC  |
| ENSG00000108753 | GUAACAG  |
| ENSG00000108753 | UCAAGUA  |
| ENSG00000108759 | GGCUCUG  |
| ENSG00000108759 | UCCUUGC  |
| ENSG00000108771 | ACUGCAG  |
| ENSG00000108774 | AAGGUGC  |
| ENSG00000108774 | AAGUGCA  |
| ENSG00000108774 | AAGUGCU  |
| ENSG00000108774 | AUAUUAU  |
| ENSG00000108774 | GAGAAAU  |
| ENSG00000108774 | GCAGGUU  |
| ENSG00000108774 | GGCUCAG  |
| ENSG00000108774 | GGUUACC  |
| ENSG00000108774 | UAAGACG  |
| ENSG00000108774 | UCCAGUU  |
| ENSG00000108774 | UGUUGAA  |
| ENSG00000108774 | UUGGUCC  |
| ENSG00000108774 | UUGGUUC  |
| ENSG00000108788 | AAAAAUC  |
| ENSG00000108788 | AGCAAAA  |
| ENSG00000108788 | UUGGCAC  |
| ENSG00000108797 | AGCAGCA  |
| ENSG00000108797 | GCAGCAU  |
| ENSG00000108797 | GGCAGUG  |
| ENSG00000108797 | UGCAUUAU |
| ENSG00000108797 | UUUGCAA  |
| ENSG00000108799 | AGUGCUU  |
| ENSG00000108799 | CAGUCUG  |
| ENSG00000108799 | CAGUGCA  |
| ENSG00000108799 | GAGGUAG  |
| ENSG00000108799 | GCAGGAC  |
| ENSG00000108799 | UCACAAG  |
| ENSG00000108799 | UCCUGAG  |
| ENSG00000108813 | GCAGGUU  |
| ENSG00000108813 | GGGGUGC  |
| ENSG00000108813 | UCUGGAG  |
| ENSG00000108819 | AAUACUG  |
| ENSG00000108819 | CAAGAGC  |
| ENSG00000108819 | CAGUGCA  |
| ENSG00000108819 | GGAGGCA  |
| ENSG00000108819 | GGCAGGG  |
| ENSG00000108819 | GUCCAGA  |
| ENSG00000108819 | GUCUGCC  |
| ENSG00000108819 | UCCAGAG  |
| ENSG00000108819 | UCCCUUG  |
| ENSG00000108819 | UGAAGCU  |
| ENSG00000108819 | UGAGGAC  |
| ENSG00000108819 | UUGGCAA  |

|                 |         |
|-----------------|---------|
| ENSG00000108819 | UUGGCAC |
| ENSG00000108819 | UUGGUCC |
| ENSG00000108821 | AAAACUG |
| ENSG00000108821 | AGAUAAA |
| ENSG00000108821 | AGGUAGU |
| ENSG00000108821 | CUCAAAC |
| ENSG00000108821 | CUGGGCA |
| ENSG00000108821 | GAGAUGA |
| ENSG00000108821 | GAGGUAG |
| ENSG00000108821 | GGGUCUU |
| ENSG00000108821 | GGGUGGU |
| ENSG00000108821 | UUCAAGC |
| ENSG00000108821 | UUGGUCC |
| ENSG00000108821 | UUGGUUC |
| ENSG00000108828 | AGCAGCA |
| ENSG00000108828 | CCUGUC  |
| ENSG00000108828 | CUUUGGU |
| ENSG00000108828 | GAGCUGC |
| ENSG00000108828 | GGAAUGU |
| ENSG00000108828 | GGGGAGC |
| ENSG00000108828 | GUAAACA |
| ENSG00000108828 | UCCUGAG |
| ENSG00000108828 | UUGACAC |
| ENSG00000108828 | UUGGCAA |
| ENSG00000108828 | UUGGCAC |
| ENSG00000108829 | AAAAGUA |
| ENSG00000108829 | AGUAGAC |
| ENSG00000108829 | CAGCAGA |
| ENSG00000108829 | CAGCAGG |
| ENSG00000108829 | CCAGCAU |
| ENSG00000108829 | CUACAAA |
| ENSG00000108829 | GACCAUG |
| ENSG00000108829 | GAGGCAG |
| ENSG00000108829 | GCAGGUU |
| ENSG00000108829 | GGAAGCC |
| ENSG00000108829 | GUAGUGU |
| ENSG00000108829 | GUCCAGA |
| ENSG00000108829 | GUGACAG |
| ENSG00000108829 | GUUAAUG |
| ENSG00000108829 | UAAUGCU |
| ENSG00000108829 | UACAAAG |
| ENSG00000108829 | UAUAAAG |
| ENSG00000108829 | UGUGUCA |
| ENSG00000108829 | UCCAUA  |
| ENSG00000108829 | UUGUGUC |
| ENSG00000108830 | AAAGAGG |
| ENSG00000108830 | AAUUAUU |
| ENSG00000108830 | ACUGGCU |
| ENSG00000108830 | AGUGCAA |
| ENSG00000108830 | CAAAACU |
| ENSG00000108830 | CACACCU |
| ENSG00000108830 | CAGCAGA |
| ENSG00000108830 | CCCCAG  |
| ENSG00000108830 | CUCCAC  |
| ENSG00000108830 | CUGGGGG |
| ENSG00000108830 | GAAAACA |
| ENSG00000108830 | GAAGGUC |
| ENSG00000108830 | GCUACAU |
| ENSG00000108830 | GGGGGAA |
| ENSG00000108830 | UCCUGU  |
| ENSG00000108830 | UGGGGGA |
| ENSG00000108830 | UCCAUA  |
| ENSG00000108839 | CAGCAGA |
| ENSG00000108840 | AAGGCAC |

|                 |         |
|-----------------|---------|
| ENSG00000108840 | AGGACAC |
| ENSG00000108840 | CACAGUG |
| ENSG00000108840 | CACCAGC |
| ENSG00000108840 | CUUUGGU |
| ENSG00000108840 | GAGGCAG |
| ENSG00000108840 | GGUUUAC |
| ENSG00000108840 | GUGACUG |
| ENSG00000108840 | UAAUAGU |
| ENSG00000108840 | UACAAAG |
| ENSG00000108840 | UUGGUUC |
| ENSG00000108852 | AGUGGUU |
| ENSG00000108852 | CACAGUG |
| ENSG00000108852 | UACAAAG |
| ENSG00000108854 | AAUACUG |
| ENSG00000108854 | AGCAGCA |
| ENSG00000108854 | AGCAGCG |
| ENSG00000108854 | AGCAUUC |
| ENSG00000108854 | AGUAGUU |
| ENSG00000108861 | AAAUGGU |
| ENSG00000108861 | AAGGCAC |
| ENSG00000108861 | AGUGCCU |
| ENSG00000108861 | CCUGCUG |
| ENSG00000108861 | UGCAUAU |
| ENSG00000108861 | UGGGACA |
| ENSG00000108861 | UUCCUAG |
| ENSG00000108924 | AAGGCAC |
| ENSG00000108924 | AAGUGCU |
| ENSG00000108924 | AAUACUG |
| ENSG00000108924 | AAUCUCA |
| ENSG00000108924 | ACAUUCA |
| ENSG00000108924 | ACCACAG |
| ENSG00000108924 | ACUCAGG |
| ENSG00000108924 | ACUGUAG |
| ENSG00000108924 | AGCACCA |
| ENSG00000108924 | AGGUAGU |
| ENSG00000108924 | AGUGCAA |
| ENSG00000108924 | AUAAUAC |
| ENSG00000108924 | AUAUAAC |
| ENSG00000108924 | AUAUUAU |
| ENSG00000108924 | AUGGCAC |
| ENSG00000108924 | AUGUCUG |
| ENSG00000108924 | AUUCAUU |
| ENSG00000108924 | CAGUGCA |
| ENSG00000108924 | CCAGUGU |
| ENSG00000108924 | CUCUAGC |
| ENSG00000108924 | CUUCUCU |
| ENSG00000108924 | GAGGUAG |
| ENSG00000108924 | GAUUGGU |
| ENSG00000108924 | GCAGCAU |
| ENSG00000108924 | GUAAACA |
| ENSG00000108924 | GUGCAAA |
| ENSG00000108924 | GUGCUUG |
| ENSG00000108924 | GUGUCAC |
| ENSG00000108924 | UAGGUAU |
| ENSG00000108924 | UAUAAUA |
| ENSG00000108924 | UCCCUCU |
| ENSG00000108924 | UCCUAUA |
| ENSG00000108924 | UGGGUGA |
| ENSG00000108924 | UGUAUAA |
| ENSG00000108924 | UGUCUUU |
| ENSG00000108924 | UGUGCUU |
| ENSG00000108924 | UGUGUCA |
| ENSG00000108924 | UUCCUAG |
| ENSG00000108924 | UUGGUCC |

|                 |         |
|-----------------|---------|
| ENSG00000108932 | UCAAGUA |
| ENSG00000108932 | UCCCUUG |
| ENSG00000108946 | AAAGCUG |
| ENSG00000108946 | AACAAAC |
| ENSG00000108946 | AAUACUG |
| ENSG00000108946 | AGUAACA |
| ENSG00000108946 | AUAUUAU |
| ENSG00000108946 | CACUCCU |
| ENSG00000108946 | CACUGUU |
| ENSG00000108946 | CUCCCAA |
| ENSG00000108946 | GCAACUU |
| ENSG00000108946 | GUAAACA |
| ENSG00000108946 | GUCACUC |
| ENSG00000108947 | AAAUUUC |
| ENSG00000108947 | AAGAACC |
| ENSG00000108947 | AAGGCAC |
| ENSG00000108947 | ACAGUAC |
| ENSG00000108947 | ACAGUAU |
| ENSG00000108947 | AGGAGCU |
| ENSG00000108947 | CCUGCUG |
| ENSG00000108947 | GAGGCAG |
| ENSG00000108947 | GAGGUAU |
| ENSG00000108947 | GCUGGUG |
| ENSG00000108947 | GCUUCCU |
| ENSG00000108947 | GGGAACG |
| ENSG00000108947 | GGGGUGG |
| ENSG00000108947 | UACAGUU |
| ENSG00000108947 | UCCAGUU |
| ENSG00000108947 | UCCCUUG |
| ENSG00000108947 | UGUCUGG |
| ENSG00000108947 | UUCAAAU |
| ENSG00000108950 | AGUGCUU |
| ENSG00000108953 | AAAAGUA |
| ENSG00000108953 | AAAGAAU |
| ENSG00000108953 | AAAGAGG |
| ENSG00000108953 | AAAGCUG |
| ENSG00000108953 | AACCUGG |
| ENSG00000108953 | AACCUGU |
| ENSG00000108953 | AAUGUUG |
| ENSG00000108953 | ACCAGCA |
| ENSG00000108953 | AGCAAAA |
| ENSG00000108953 | AGCACCA |
| ENSG00000108953 | CAGGAAC |
| ENSG00000108953 | CAGUAGU |
| ENSG00000108953 | CCAGUAC |
| ENSG00000108953 | GGCAAGA |
| ENSG00000108953 | GUUAAUG |
| ENSG00000108953 | UAAUGCU |
| ENSG00000108953 | UCAAGUA |
| ENSG00000108953 | UGUUGAA |
| ENSG00000108960 | AAGACAU |
| ENSG00000108960 | AAUGUUG |
| ENSG00000108960 | AGCAGCA |
| ENSG00000108960 | CACAGUG |
| ENSG00000108960 | GAGGUAU |
| ENSG00000108960 | UACAAAG |
| ENSG00000108960 | UCACAGG |
| ENSG00000108960 | UUGGCAA |
| ENSG00000108961 | AUAAAGU |
| ENSG00000108961 | UAUAAAG |
| ENSG00000108963 | GAGGCUG |
| ENSG00000108984 | AGCACCA |
| ENSG00000109016 | UCCACA  |
| ENSG00000109016 | UCCACC  |

|                 |         |
|-----------------|---------|
| ENSG00000109046 | AACGGAA |
| ENSG00000109046 | ACAGUAC |
| ENSG00000109046 | ACAGUAU |
| ENSG00000109046 | AGAUAAA |
| ENSG00000109046 | AGCAGCG |
| ENSG00000109046 | CACAGUG |
| ENSG00000109046 | CAGUAGA |
| ENSG00000109046 | CUGCAGC |
| ENSG00000109046 | CUUUGGU |
| ENSG00000109046 | GCAGGUU |
| ENSG00000109046 | UAAUACA |
| ENSG00000109046 | UAUUGCU |
| ENSG00000109046 | UCACAGG |
| ENSG00000109046 | UGUAUGU |
| ENSG00000109047 | AGGAGCU |
| ENSG00000109062 | GGCUCAG |
| ENSG00000109065 | CUGCAGG |
| ENSG00000109065 | CUGCCCC |
| ENSG00000109065 | GCAGGAC |
| ENSG00000109065 | UGCAGCU |
| ENSG00000109066 | AACCGG  |
| ENSG00000109066 | AAGGCAC |
| ENSG00000109066 | CAGGUGA |
| ENSG00000109066 | CCCACCG |
| ENSG00000109066 | GAGGCUG |
| ENSG00000109066 | GGCAGUG |
| ENSG00000109066 | GUGUGGC |
| ENSG00000109066 | UGCCAGC |
| ENSG00000109066 | UGUGUGG |
| ENSG00000109066 | UUGGAGG |
| ENSG00000109079 | AAAGUGC |
| ENSG00000109079 | AAGUGCU |
| ENSG00000109079 | AGCACCA |
| ENSG00000109079 | AGCAGCA |
| ENSG00000109079 | CAAAGUG |
| ENSG00000109079 | CUGCAGG |
| ENSG00000109079 | GCAGAAG |
| ENSG00000109079 | GGGGUGG |
| ENSG00000109079 | UACAAAG |
| ENSG00000109083 | UUGUUCG |
| ENSG00000109084 | AGCAAAA |
| ENSG00000109084 | AGCAGCU |
| ENSG00000109084 | CAGCAGA |
| ENSG00000109084 | CAGCAGG |
| ENSG00000109084 | GGCAGUG |
| ENSG00000109084 | UGGGGGA |
| ENSG00000109084 | UUUCAAC |
| ENSG00000109084 | UUUUUGC |
| ENSG00000109089 | AAGGCAC |
| ENSG00000109089 | AAUACUG |
| ENSG00000109089 | AAUCUCU |
| ENSG00000109089 | AUGGCUU |
| ENSG00000109089 | CACAGUG |
| ENSG00000109089 | CAGCAGG |
| ENSG00000109089 | CCCUGAG |
| ENSG00000109089 | GACCGG  |
| ENSG00000109089 | GGGUGGU |
| ENSG00000109089 | UCAAGUA |
| ENSG00000109089 | UCACAGU |
| ENSG00000109089 | UCCAGUU |
| ENSG00000109089 | UGCAUUG |
| ENSG00000109099 | AUGUAAU |
| ENSG00000109099 | CCAGUGC |
| ENSG00000109099 | CCAGUGU |

|                 |          |
|-----------------|----------|
| ENSG00000109099 | GAGUCUU  |
| ENSG00000109099 | GUCAACA  |
| ENSG00000109099 | UCCAGUU  |
| ENSG00000109101 | UCCUUGC  |
| ENSG00000109101 | UGACCUA  |
| ENSG00000109103 | CUCAGGG  |
| ENSG00000109103 | GAAAACA  |
| ENSG00000109107 | CCAGGAG  |
| ENSG00000109111 | AACACUG  |
| ENSG00000109111 | ACUGUUU  |
| ENSG00000109111 | CACUGUU  |
| ENSG00000109113 | AGUGCAA  |
| ENSG00000109113 | CAGCAGG  |
| ENSG00000109113 | GCCUGGG  |
| ENSG00000109113 | GUGCAA   |
| ENSG00000109113 | UAAUGCU  |
| ENSG00000109113 | UUGGCAA  |
| ENSG00000109113 | UUGGCAC  |
| ENSG00000109113 | UUGGUCC  |
| ENSG00000109118 | AAUGCCC  |
| ENSG00000109118 | AGUGCAA  |
| ENSG00000109118 | AUGUGCC  |
| ENSG00000109118 | CAA AUGC |
| ENSG00000109118 | UGCAAAG  |
| ENSG00000109132 | AAACUGU  |
| ENSG00000109132 | AAAGCUG  |
| ENSG00000109132 | AACAAAC  |
| ENSG00000109132 | AACAUUC  |
| ENSG00000109132 | ACAUUCA  |
| ENSG00000109132 | AGCAGCG  |
| ENSG00000109132 | AGGAUGU  |
| ENSG00000109132 | AUUCAUU  |
| ENSG00000109132 | CAAAGCA  |
| ENSG00000109132 | CCCUGAG  |
| ENSG00000109132 | CUUGGAG  |
| ENSG00000109132 | GAGAACU  |
| ENSG00000109132 | GCUGGUG  |
| ENSG00000109132 | GUGCCUG  |
| ENSG00000109132 | GUUAAUG  |
| ENSG00000109132 | UAAUAUC  |
| ENSG00000109132 | UGAGUCU  |
| ENSG00000109132 | UGGACUG  |
| ENSG00000109133 | AAUACUG  |
| ENSG00000109158 | AACUACU  |
| ENSG00000109158 | AGCAUUC  |
| ENSG00000109158 | CUGACUC  |
| ENSG00000109158 | GGUGGGC  |
| ENSG00000109158 | GUGCCAC  |
| ENSG00000109158 | UAAUAGU  |
| ENSG00000109158 | UCCCACA  |
| ENSG00000109158 | UCCCACC  |
| ENSG00000109163 | GCCCUUA  |
| ENSG00000109163 | UUAGGAU  |
| ENSG00000109171 | AACCUGG  |
| ENSG00000109171 | AACCUGU  |
| ENSG00000109171 | AAGGCAC  |
| ENSG00000109171 | ACCACAG  |
| ENSG00000109171 | AGCCCUU  |
| ENSG00000109171 | CAGCAAA  |
| ENSG00000109171 | CAGGCUC  |
| ENSG00000109171 | CCUGUAC  |
| ENSG00000109171 | CUAGUAA  |
| ENSG00000109171 | CUUUGGU  |
| ENSG00000109171 | GACCAUG  |

|                 |          |
|-----------------|----------|
| ENSG00000109171 | GAUUGUC  |
| ENSG00000109171 | GCUACAU  |
| ENSG00000109171 | GGAAGCC  |
| ENSG00000109171 | GUCAUUG  |
| ENSG00000109171 | UCCUGAG  |
| ENSG00000109171 | UCUAGAG  |
| ENSG00000109171 | UGCAUAG  |
| ENSG00000109171 | UGCAUUA  |
| ENSG00000109171 | UGUGCUU  |
| ENSG00000109171 | UUCUGCA  |
| ENSG00000109171 | UUCUUGU  |
| ENSG00000109180 | AAAAACC  |
| ENSG00000109180 | AAACUGU  |
| ENSG00000109180 | ACAAUAU  |
| ENSG00000109180 | GCUGGAU  |
| ENSG00000109180 | UAUAAUA  |
| ENSG00000109180 | UCAACAG  |
| ENSG00000109180 | UGAAGCU  |
| ENSG00000109184 | AAUACUG  |
| ENSG00000109184 | AAUCUCA  |
| ENSG00000109184 | ACAAUAU  |
| ENSG00000109184 | ACAGUAU  |
| ENSG00000109184 | ACAUCAC  |
| ENSG00000109184 | AGCACCA  |
| ENSG00000109184 | AGCAGCA  |
| ENSG00000109184 | AGCAUUC  |
| ENSG00000109184 | AGUGCAA  |
| ENSG00000109184 | AUGGCUU  |
| ENSG00000109184 | AUGUAAU  |
| ENSG00000109184 | CAAAGCA  |
| ENSG00000109184 | CAGUGCA  |
| ENSG00000109184 | CUCUAGC  |
| ENSG00000109184 | CUUACAG  |
| ENSG00000109184 | CUUUGGU  |
| ENSG00000109184 | GAGGUUA  |
| ENSG00000109184 | GCAGCAU  |
| ENSG00000109184 | GCUGGUG  |
| ENSG00000109184 | UCACCAC  |
| ENSG00000109184 | UGAAAUG  |
| ENSG00000109184 | UGAGGAC  |
| ENSG00000109184 | UUGGUCC  |
| ENSG00000109189 | AAGUGCU  |
| ENSG00000109189 | AGAUAAA  |
| ENSG00000109189 | AGCUGCC  |
| ENSG00000109189 | AUAAAAGU |
| ENSG00000109189 | CACAGUG  |
| ENSG00000109189 | CCAGUGC  |
| ENSG00000109189 | CCAGUGU  |
| ENSG00000109189 | CUUCACC  |
| ENSG00000109189 | GAGAUGA  |
| ENSG00000109189 | UCACAGG  |
| ENSG00000109189 | UCACAUU  |
| ENSG00000109189 | UCCAGUU  |
| ENSG00000109189 | UGCCUG   |
| ENSG00000109220 | AAGGCAC  |
| ENSG00000109220 | AGCACCA  |
| ENSG00000109220 | CCAGGAG  |
| ENSG00000109220 | GCACCAU  |
| ENSG00000109220 | UCACCAC  |
| ENSG00000109265 | AAAAAUC  |
| ENSG00000109265 | AAAGGUA  |
| ENSG00000109265 | AACACUG  |
| ENSG00000109265 | ACAUUAC  |
| ENSG00000109265 | AUACAAG  |

|                 |          |
|-----------------|----------|
| ENSG00000109265 | AUUCAUU  |
| ENSG00000109265 | CAGUCUG  |
| ENSG00000109265 | GAAGGUC  |
| ENSG00000109265 | GGCAAGA  |
| ENSG00000109265 | UCACAAG  |
| ENSG00000109265 | UGAAAGG  |
| ENSG00000109265 | UGUCUUU  |
| ENSG00000109265 | UUCUAAU  |
| ENSG00000109265 | UUGGCAA  |
| ENSG00000109320 | AAAUCCC  |
| ENSG00000109320 | ACAAUAU  |
| ENSG00000109320 | AGCAUUC  |
| ENSG00000109320 | GCAGAAG  |
| ENSG00000109320 | UUGAUCA  |
| ENSG00000109332 | AAAGCUG  |
| ENSG00000109332 | AAGACAU  |
| ENSG00000109332 | ACAGUAC  |
| ENSG00000109332 | AGGUUUAU |
| ENSG00000109332 | AUAAUAC  |
| ENSG00000109332 | AUAUUUAU |
| ENSG00000109332 | AUGAGCU  |
| ENSG00000109332 | CAGUGCA  |
| ENSG00000109332 | CAGUUAC  |
| ENSG00000109332 | CUCCCAC  |
| ENSG00000109332 | GGAAGAC  |
| ENSG00000109332 | GGGGAGC  |
| ENSG00000109332 | GGUUUAC  |
| ENSG00000109332 | GUAAACA  |
| ENSG00000109332 | UAAUACA  |
| ENSG00000109332 | UCACAUU  |
| ENSG00000109332 | UGACAUC  |
| ENSG00000109332 | UGUGUCA  |
| ENSG00000109332 | UUCUGCA  |
| ENSG00000109332 | UUGAUCA  |
| ENSG00000109339 | AGGCAGG  |
| ENSG00000109339 | CAAAGCA  |
| ENSG00000109381 | AACACUG  |
| ENSG00000109381 | AAUACUG  |
| ENSG00000109381 | ACUGUGU  |
| ENSG00000109381 | AUACAAG  |
| ENSG00000109381 | UCCAGUU  |
| ENSG00000109381 | UUCAAAU  |
| ENSG00000109381 | UUGGUCC  |
| ENSG00000109436 | AACAUUC  |
| ENSG00000109436 | AAGUGCA  |
| ENSG00000109436 | ACAUUCA  |
| ENSG00000109436 | GCAGGUU  |
| ENSG00000109436 | UAUAAAG  |
| ENSG00000109452 | UUCCUAG  |
| ENSG00000109452 | UUGUGUC  |
| ENSG00000109458 | AAUACUG  |
| ENSG00000109466 | UUGGCAA  |
| ENSG00000109466 | UUGGCAC  |
| ENSG00000109501 | AAGUGCU  |
| ENSG00000109501 | AGUGCUU  |
| ENSG00000109572 | GGCUCAG  |
| ENSG00000109572 | UCACAUU  |
| ENSG00000109572 | UUCUUGU  |
| ENSG00000109586 | AAAGAGG  |
| ENSG00000109586 | AAAGUUU  |
| ENSG00000109586 | AACCUGG  |
| ENSG00000109586 | AACCUGU  |
| ENSG00000109586 | AAGUGUG  |
| ENSG00000109586 | AAUCACU  |



|                 |         |
|-----------------|---------|
| ENSG00000109586 | ACAGUAC |
| ENSG00000109586 | ACAGUAU |
| ENSG00000109586 | AGUGAUC |
| ENSG00000109586 | AGUGCUU |
| ENSG00000109586 | AUACAAG |
| ENSG00000109586 | AUGCAUU |
| ENSG00000109586 | CAGCAGG |
| ENSG00000109586 | CAGUCCA |
| ENSG00000109586 | CCCUGAG |
| ENSG00000109586 | CCUUCAU |
| ENSG00000109586 | GAAGGAA |
| ENSG00000109586 | GAGUGUG |
| ENSG00000109586 | UCAAGUA |
| ENSG00000109586 | UGAAAUG |
| ENSG00000109586 | UGCAGCU |
| ENSG00000109586 | UGUUGAA |
| ENSG00000109586 | UUUCAAC |
| ENSG00000109606 | AAGUUGU |
| ENSG00000109606 | CUACAGU |
| ENSG00000109606 | GGAAUGU |
| ENSG00000109606 | GGAGGCA |
| ENSG00000109606 | GUAACAG |
| ENSG00000109606 | GUCUACU |
| ENSG00000109606 | UUCUAAU |
| ENSG00000109606 | UUGUGUC |
| ENSG00000109654 | AACACUG |
| ENSG00000109654 | AAGGUGC |
| ENSG00000109654 | AAGUGCU |
| ENSG00000109654 | ACCCUGU |
| ENSG00000109654 | AGCAGCA |
| ENSG00000109654 | AGUGCUG |
| ENSG00000109654 | AUGCCUU |
| ENSG00000109654 | AUGGCAC |
| ENSG00000109654 | CACAGGG |
| ENSG00000109654 | CUUUGGU |
| ENSG00000109654 | GCCCUUA |
| ENSG00000109654 | GGUUGAC |
| ENSG00000109654 | UAAUAUC |
| ENSG00000109654 | UAAUGCU |
| ENSG00000109654 | UCAUGAU |
| ENSG00000109654 | UCCCUUU |
| ENSG00000109654 | UGCUGAC |
| ENSG00000109670 | AAACUGU |
| ENSG00000109670 | AAAGCUG |
| ENSG00000109670 | AAGUCUU |
| ENSG00000109670 | ACACACU |
| ENSG00000109670 | ACAGUAC |
| ENSG00000109670 | ACAGUAU |
| ENSG00000109670 | ACCACAG |
| ENSG00000109670 | ACUGUGU |
| ENSG00000109670 | AGCACCA |
| ENSG00000109670 | AGCAGCG |
| ENSG00000109670 | AGCAGCU |
| ENSG00000109670 | AGCUGCC |
| ENSG00000109670 | AUCCCUU |
| ENSG00000109670 | AUGCAUU |
| ENSG00000109670 | CACAGUG |
| ENSG00000109670 | CACCACC |
| ENSG00000109670 | CACCAGC |
| ENSG00000109670 | CAGUCUG |
| ENSG00000109670 | CCAGCAU |
| ENSG00000109670 | CUGUUGA |
| ENSG00000109670 | GACAACU |
| ENSG00000109670 | GAGGCAG |

|                 |          |
|-----------------|----------|
| ENSG00000109670 | GAGUUGA  |
| ENSG00000109670 | GAGUUGG  |
| ENSG00000109670 | GAUUGUA  |
| ENSG00000109670 | GAUUGUC  |
| ENSG00000109670 | GCAGCAU  |
| ENSG00000109670 | GGAAGCC  |
| ENSG00000109670 | GGAAUGU  |
| ENSG00000109670 | UAGAGGA  |
| ENSG00000109670 | UCACAGG  |
| ENSG00000109670 | UCCCUUU  |
| ENSG00000109670 | UGACAUC  |
| ENSG00000109670 | UGGCCAC  |
| ENSG00000109670 | UGGGACA  |
| ENSG00000109670 | UUCUCUG  |
| ENSG00000109670 | UUCUAAU  |
| ENSG00000109685 | AAAAACC  |
| ENSG00000109685 | AACAAAC  |
| ENSG00000109685 | ACAAUUAU |
| ENSG00000109685 | ACAUCAC  |
| ENSG00000109685 | ACAUUCA  |
| ENSG00000109685 | ACUCCAG  |
| ENSG00000109685 | ACUUGGA  |
| ENSG00000109685 | AGCAAAA  |
| ENSG00000109685 | AGCAGCU  |
| ENSG00000109685 | AUCCCUU  |
| ENSG00000109685 | AUGCAUU  |
| ENSG00000109685 | CAAAGCA  |
| ENSG00000109685 | CAGGCUC  |
| ENSG00000109685 | CUCUUCC  |
| ENSG00000109685 | CUGCAGC  |
| ENSG00000109685 | CUUGGAG  |
| ENSG00000109685 | GAUUGUA  |
| ENSG00000109685 | GAUUGUC  |
| ENSG00000109685 | GCCUGGA  |
| ENSG00000109685 | GUAUGUU  |
| ENSG00000109685 | UACAAAG  |
| ENSG00000109685 | UAGAGGA  |
| ENSG00000109685 | UCACAAG  |
| ENSG00000109685 | UGGAGAU  |
| ENSG00000109685 | UUCCUAG  |
| ENSG00000109685 | UUGACAC  |
| ENSG00000109689 | ACAUUCA  |
| ENSG00000109689 | CAGUAGU  |
| ENSG00000109689 | UCACAGU  |
| ENSG00000109705 | AAAGUGC  |
| ENSG00000109705 | ACAUAGA  |
| ENSG00000109705 | ACAUUCA  |
| ENSG00000109705 | CACAGUG  |
| ENSG00000109705 | CAUGGAU  |
| ENSG00000109705 | CCAGGAG  |
| ENSG00000109705 | UAUAAAG  |
| ENSG00000109738 | AUGGCUU  |
| ENSG00000109756 | AAAAGUA  |
| ENSG00000109756 | AAAGUAU  |
| ENSG00000109756 | AAAGUGC  |
| ENSG00000109756 | AACACUG  |
| ENSG00000109756 | AAGACAU  |
| ENSG00000109756 | AAGGCAC  |
| ENSG00000109756 | AAGUGCA  |
| ENSG00000109756 | AAGUGCU  |
| ENSG00000109756 | ACAGGUG  |
| ENSG00000109756 | ACAGUAU  |
| ENSG00000109756 | ACAUCAC  |
| ENSG00000109756 | ACAUUCA  |

|                 |         |
|-----------------|---------|
| ENSG00000109756 | ACCAGCA |
| ENSG00000109756 | AGCAGCA |
| ENSG00000109756 | AGCAGCG |
| ENSG00000109756 | AGCAGCU |
| ENSG00000109756 | AGGCAGG |
| ENSG00000109756 | AGUAGAC |
| ENSG00000109756 | AUGCACC |
| ENSG00000109756 | CACAGUG |
| ENSG00000109756 | CACCAGC |
| ENSG00000109756 | CCGGAGC |
| ENSG00000109756 | CUUCACC |
| ENSG00000109756 | GAGAAGA |
| ENSG00000109756 | GAUCAGA |
| ENSG00000109756 | GGAAUGU |
| ENSG00000109756 | GGAGGCA |
| ENSG00000109756 | GGCAGCG |
| ENSG00000109756 | UCAACAG |
| ENSG00000109756 | UCACAGG |
| ENSG00000109756 | UCACAUU |
| ENSG00000109756 | UCCAGUU |
| ENSG00000109756 | UGUGCUU |
| ENSG00000109756 | UUCUAAU |
| ENSG00000109756 | UUCUGCA |
| ENSG00000109756 | UUCUUGU |
| ENSG00000109762 | AAAGAGG |
| ENSG00000109771 | AUGAUGA |
| ENSG00000109771 | UAUAAAG |
| ENSG00000109771 | UCUUGAG |
| ENSG00000109771 | UGUUGAA |
| ENSG00000109787 | AAAAAUC |
| ENSG00000109787 | AAAGUGC |
| ENSG00000109787 | AACAUUC |
| ENSG00000109787 | AAUACUG |
| ENSG00000109787 | ACAUUAC |
| ENSG00000109787 | ACAUUCA |
| ENSG00000109787 | AGCCCUU |
| ENSG00000109787 | AGCCUGC |
| ENSG00000109787 | AGUACUG |
| ENSG00000109787 | AUAAUAC |
| ENSG00000109787 | AUGACAC |
| ENSG00000109787 | AUGUAAU |
| ENSG00000109787 | AUUGCAC |
| ENSG00000109787 | CACAGUG |
| ENSG00000109787 | CCCUGAG |
| ENSG00000109787 | CCUGCUG |
| ENSG00000109787 | CCUUCAU |
| ENSG00000109787 | GACCAUG |
| ENSG00000109787 | GACCCUG |
| ENSG00000109787 | GCAGGUU |
| ENSG00000109787 | GCAUCC  |
| ENSG00000109787 | GGCAAGA |
| ENSG00000109787 | GGUUUAC |
| ENSG00000109787 | GUCACUC |
| ENSG00000109787 | GUCAUUG |
| ENSG00000109787 | GUCUCUG |
| ENSG00000109787 | GUGCUUG |
| ENSG00000109787 | GUGUCAC |
| ENSG00000109787 | GUUAAUG |
| ENSG00000109787 | UAAUAUC |
| ENSG00000109787 | UAUAAAG |
| ENSG00000109787 | UAUAUGA |
| ENSG00000109787 | UCCCUUU |
| ENSG00000109787 | UCCUGAG |
| ENSG00000109787 | UCUCCAA |

|                 |         |
|-----------------|---------|
| ENSG00000109787 | UGACAUC |
| ENSG00000109787 | UGGACUG |
| ENSG00000109787 | UGUCUUU |
| ENSG00000109787 | UGUGCUU |
| ENSG00000109787 | UUGACAC |
| ENSG00000109787 | UUGGCAC |
| ENSG00000109790 | UCACAUU |
| ENSG00000109805 | CUUUGGU |
| ENSG00000109814 | AAAAACC |
| ENSG00000109814 | AAAGUGC |
| ENSG00000109814 | UACAAAG |
| ENSG00000109814 | UCAUUUG |
| ENSG00000109814 | UCUAGAG |
| ENSG00000109819 | AAAAACC |
| ENSG00000109819 | AACAAAC |
| ENSG00000109819 | AACAUUC |
| ENSG00000109819 | ACCCAUC |
| ENSG00000109819 | ACUGGCC |
| ENSG00000109819 | AGCAGCU |
| ENSG00000109819 | AGGACAC |
| ENSG00000109819 | AUAAUAC |
| ENSG00000109819 | AUAUAAC |
| ENSG00000109819 | CAAAACU |
| ENSG00000109819 | CAGUGCA |
| ENSG00000109819 | CAUGGGU |
| ENSG00000109819 | CUCCAUC |
| ENSG00000109819 | GAGGUAG |
| ENSG00000109819 | GAUUGUC |
| ENSG00000109819 | GCUGGUG |
| ENSG00000109819 | GGCAGGG |
| ENSG00000109819 | GUAACAG |
| ENSG00000109819 | UAAUAGU |
| ENSG00000109819 | UACAGUU |
| ENSG00000109819 | UAUAAUA |
| ENSG00000109819 | UAUUACC |
| ENSG00000109819 | UCACACA |
| ENSG00000109819 | UCCCUUG |
| ENSG00000109819 | UGCAUAG |
| ENSG00000109819 | UGUGCUU |
| ENSG00000109832 | CUCACAC |
| ENSG00000109832 | UCUCACC |
| ENSG00000109861 | AGCUGCC |
| ENSG00000109861 | CCAUUAC |
| ENSG00000109861 | CUUGGAG |
| ENSG00000109861 | GAGGUAG |
| ENSG00000109861 | GCUAGCA |
| ENSG00000109861 | UCAUGAU |
| ENSG00000109861 | UCUAGAG |
| ENSG00000109861 | UCUCAAG |
| ENSG00000109861 | UGAAAUG |
| ENSG00000109861 | UUGGAGG |
| ENSG00000109881 | AGCUUAU |
| ENSG00000109881 | UUAGAGA |
| ENSG00000109919 | AAAGCGC |
| ENSG00000109919 | AACAUUC |
| ENSG00000109919 | AAGACAU |
| ENSG00000109919 | AGCAAAA |
| ENSG00000109919 | CACUGUU |
| ENSG00000109919 | CUGCCCC |
| ENSG00000109919 | GUCACUC |
| ENSG00000109919 | UUGGCAC |
| ENSG00000109919 | UUUUUGC |
| ENSG00000109920 | AAUACUG |
| ENSG00000109920 | AUUGCAC |

|                 |         |
|-----------------|---------|
| ENSG00000109920 | GAGAAAU |
| ENSG00000109920 | GAGCUGC |
| ENSG00000109929 | AUCCUUG |
| ENSG00000109929 | AUGCCUU |
| ENSG00000109929 | UAAUACA |
| ENSG00000109929 | UAUCAGA |
| ENSG00000109929 | UCCUGAG |
| ENSG00000109943 | AUUGCAC |
| ENSG00000109943 | GUAGUGU |
| ENSG00000109956 | AAAAACC |
| ENSG00000109956 | AAUUUUA |
| ENSG00000109956 | AGGGUCU |
| ENSG00000109956 | CAGUCCA |
| ENSG00000109956 | GAGGUAG |
| ENSG00000109956 | GAGGUAU |
| ENSG00000109956 | GCUUCCU |
| ENSG00000109956 | GUAAACA |
| ENSG00000109956 | GUGCUUG |
| ENSG00000109956 | UAUAAAG |
| ENSG00000109956 | UGGGAUC |
| ENSG00000109971 | AAUGCCC |
| ENSG00000109971 | UGCAUUG |
| ENSG00000110025 | CAGUUAC |
| ENSG00000110025 | GGCAGUG |
| ENSG00000110025 | UCCAGUU |
| ENSG00000110025 | UUGGUCC |
| ENSG00000110042 | AAAAACC |
| ENSG00000110042 | AAGAACC |
| ENSG00000110042 | ACGUCAU |
| ENSG00000110042 | AGCACCA |
| ENSG00000110042 | AUAUAAC |
| ENSG00000110042 | CAAAGCA |
| ENSG00000110042 | CCCUGAG |
| ENSG00000110042 | CCUUCUU |
| ENSG00000110042 | GAGGUAG |
| ENSG00000110042 | GAGGUAU |
| ENSG00000110042 | GAGUUGG |
| ENSG00000110042 | GAUCAGA |
| ENSG00000110042 | GCUGGUG |
| ENSG00000110042 | GCUUCCU |
| ENSG00000110042 | UCACAGU |
| ENSG00000110042 | UCAUUUG |
| ENSG00000110042 | UCCAGAG |
| ENSG00000110042 | UCCUCU  |
| ENSG00000110042 | UGCUGAC |
| ENSG00000110042 | UUCAAAU |
| ENSG00000110046 | AAAGUGC |
| ENSG00000110046 | AAGUGCA |
| ENSG00000110047 | AUAUUAU |
| ENSG00000110047 | CUUGUGU |
| ENSG00000110047 | UAAUGCU |
| ENSG00000110047 | UCAAGUA |
| ENSG00000110047 | UUCUUGU |
| ENSG00000110048 | AGCACCA |
| ENSG00000110048 | AUAAUAC |
| ENSG00000110048 | AUACAAG |
| ENSG00000110048 | AUAUAAC |
| ENSG00000110048 | GAGGCUG |
| ENSG00000110048 | GCUUCCU |
| ENSG00000110048 | GGAAUGU |
| ENSG00000110048 | GGCUCAG |
| ENSG00000110048 | UAUAAUA |
| ENSG00000110048 | UCACCAC |
| ENSG00000110048 | UCCAGAG |

|                 |         |
|-----------------|---------|
| ENSG00000110060 | AAGGCAC |
| ENSG00000110066 | AAAAGUA |
| ENSG00000110066 | AAGUGCA |
| ENSG00000110066 | AGCACCA |
| ENSG00000110066 | AGUGCAA |
| ENSG00000110066 | AUUGCAC |
| ENSG00000110066 | UCACAGG |
| ENSG00000110066 | UCACAGU |
| ENSG00000110076 | AAAGUUU |
| ENSG00000110076 | AACAAAC |
| ENSG00000110076 | CAGACAG |
| ENSG00000110076 | CUGGAAA |
| ENSG00000110076 | GAGGCAG |
| ENSG00000110076 | GGCAGUG |
| ENSG00000110076 | GGGUGUU |
| ENSG00000110076 | UUCCGGC |
| ENSG00000110076 | UUCUCUG |
| ENSG00000110079 | CUGUUGA |
| ENSG00000110090 | AUCCCUU |
| ENSG00000110090 | GAAGGAA |
| ENSG00000110090 | UUGGUUC |
| ENSG00000110092 | AAAGUGC |
| ENSG00000110092 | AAGUGCU |
| ENSG00000110092 | AAUCACU |
| ENSG00000110092 | AAUGCCC |
| ENSG00000110092 | ACUGGCC |
| ENSG00000110092 | ACUGGCU |
| ENSG00000110092 | AGAUGUG |
| ENSG00000110092 | AGCAGCG |
| ENSG00000110092 | AGCAGCU |
| ENSG00000110092 | AGUGCUU |
| ENSG00000110092 | AUAAAGU |
| ENSG00000110092 | AUAUUAU |
| ENSG00000110092 | AUGACAC |
| ENSG00000110092 | CAGCAAA |
| ENSG00000110092 | CCUUCUG |
| ENSG00000110092 | CUGGAAA |
| ENSG00000110092 | GAGGUAG |
| ENSG00000110092 | GAGGUAU |
| ENSG00000110092 | GCUGGAU |
| ENSG00000110092 | GGAAUGU |
| ENSG00000110092 | GGCAGUG |
| ENSG00000110092 | GUUAAUG |
| ENSG00000110092 | UAAUGCU |
| ENSG00000110092 | UAUAUGA |
| ENSG00000110092 | UCACAUU |
| ENSG00000110092 | UCUAGAG |
| ENSG00000110092 | UGCAUUG |
| ENSG00000110092 | UUGAUCA |
| ENSG00000110092 | UUGGCAC |
| ENSG00000110092 | UUGGUUC |
| ENSG00000110104 | AAGGCAC |
| ENSG00000110104 | CUCUCC  |
| ENSG00000110107 | ACUAGAU |
| ENSG00000110107 | CACAGUG |
| ENSG00000110107 | GAGAUGA |
| ENSG00000110107 | UACAAAG |
| ENSG00000110107 | UCACAGG |
| ENSG00000110107 | UCACAGU |
| ENSG00000110107 | UCCCACC |
| ENSG00000110107 | UCCCUUG |
| ENSG00000110107 | UGAAAUG |
| ENSG00000110108 | ACUGCAG |
| ENSG00000110108 | AGCAGCU |

|                 |         |
|-----------------|---------|
| ENSG00000110108 | UCACAUU |
| ENSG00000110148 | AGUGCUG |
| ENSG00000110171 | AAGAACC |
| ENSG00000110171 | AAGUGCA |
| ENSG00000110171 | ACAUUCA |
| ENSG00000110171 | AGUGCAA |
| ENSG00000110171 | AGUGCUG |
| ENSG00000110171 | AUAAAGU |
| ENSG00000110171 | CAAAGCA |
| ENSG00000110171 | UAUUGCU |
| ENSG00000110171 | UGAAGCU |
| ENSG00000110172 | AGCAGCA |
| ENSG00000110200 | AGCAGCU |
| ENSG00000110237 | AAGGCAC |
| ENSG00000110237 | AAGUGCA |
| ENSG00000110237 | AAUACUG |
| ENSG00000110237 | ACUGUAG |
| ENSG00000110237 | AGUGCUU |
| ENSG00000110237 | CAGUGCA |
| ENSG00000110237 | CCAGUGC |
| ENSG00000110237 | CUUUGGU |
| ENSG00000110237 | GGCCUG  |
| ENSG00000110237 | GGUAGAC |
| ENSG00000110237 | UGGCCCU |
| ENSG00000110237 | UGUCUUU |
| ENSG00000110237 | UUGGAGG |
| ENSG00000110243 | UGCAAAG |
| ENSG00000110243 | UUUGCAA |
| ENSG00000110244 | CAGACAG |
| ENSG00000110274 | GAGACCU |
| ENSG00000110274 | GAGGUAG |
| ENSG00000110274 | GAGGUAU |
| ENSG00000110315 | AAAGAAU |
| ENSG00000110315 | AAGACAU |
| ENSG00000110315 | AAGGCAC |
| ENSG00000110315 | CACAGUG |
| ENSG00000110315 | CAGCAGA |
| ENSG00000110315 | CUUGGAG |
| ENSG00000110315 | GCACCAU |
| ENSG00000110315 | GGAAUGU |
| ENSG00000110315 | GUGCCAC |
| ENSG00000110315 | UAUUGCU |
| ENSG00000110315 | UCACAGG |
| ENSG00000110315 | UCUGGAA |
| ENSG00000110321 | AAAGUGC |
| ENSG00000110321 | AAGUGCA |
| ENSG00000110321 | ACAGUAC |
| ENSG00000110321 | AGCAGCA |
| ENSG00000110321 | AGUGGUU |
| ENSG00000110321 | AUAAUAC |
| ENSG00000110321 | AUACAAG |
| ENSG00000110321 | AUAUAAC |
| ENSG00000110321 | AUGUAAU |
| ENSG00000110321 | CAAAGUG |
| ENSG00000110321 | CACACCG |
| ENSG00000110321 | CACACCU |
| ENSG00000110321 | CAGGCUC |
| ENSG00000110321 | CAGUUAC |
| ENSG00000110321 | CCAUUAC |
| ENSG00000110321 | CUACAAA |
| ENSG00000110321 | GAGGUAG |
| ENSG00000110321 | GUAUGUU |
| ENSG00000110321 | GUGCAAA |
| ENSG00000110321 | UAAGACG |

|                 |         |
|-----------------|---------|
| ENSG00000110321 | UAAGACU |
| ENSG00000110321 | UAUAAUA |
| ENSG00000110321 | UCACACA |
| ENSG00000110321 | UCCUUGC |
| ENSG00000110321 | UGGAUAA |
| ENSG00000110344 | CACAGUG |
| ENSG00000110344 | CUAGUCC |
| ENSG00000110344 | GAGGCAG |
| ENSG00000110344 | UCACAGU |
| ENSG00000110344 | UGGCUGC |
| ENSG00000110344 | UCCUCUG |
| ENSG00000110367 | AAAACUG |
| ENSG00000110367 | AAAGAGG |
| ENSG00000110367 | AAAUCCC |
| ENSG00000110367 | AACAGUC |
| ENSG00000110367 | AAGUGCA |
| ENSG00000110367 | AAGUGCU |
| ENSG00000110367 | AAUACUG |
| ENSG00000110367 | AAUCACU |
| ENSG00000110367 | AAUCCUU |
| ENSG00000110367 | AAUGUUG |
| ENSG00000110367 | ACCAGCA |
| ENSG00000110367 | ACUCAGG |
| ENSG00000110367 | ACUGCAG |
| ENSG00000110367 | ACUGGCU |
| ENSG00000110367 | AGAUAAA |
| ENSG00000110367 | AGCACCA |
| ENSG00000110367 | AGCAGCU |
| ENSG00000110367 | AGCUGCC |
| ENSG00000110367 | CAAAGCA |
| ENSG00000110367 | CAAAGUG |
| ENSG00000110367 | CACAGUG |
| ENSG00000110367 | CACUCCU |
| ENSG00000110367 | CCAGUGC |
| ENSG00000110367 | CCAGUGU |
| ENSG00000110367 | CCUUCAU |
| ENSG00000110367 | CUGCUCU |
| ENSG00000110367 | CUUGUGU |
| ENSG00000110367 | GAGAUGA |
| ENSG00000110367 | GAGCCCU |
| ENSG00000110367 | GAGCUGC |
| ENSG00000110367 | GAGGGGC |
| ENSG00000110367 | GAGUGUG |
| ENSG00000110367 | GCCUGGA |
| ENSG00000110367 | GCCUGGG |
| ENSG00000110367 | GGAUGAG |
| ENSG00000110367 | GGGGGAA |
| ENSG00000110367 | GUAACAG |
| ENSG00000110367 | GUGCCAC |
| ENSG00000110367 | GUGCUUG |
| ENSG00000110367 | GUGUGGC |
| ENSG00000110367 | UACAGUU |
| ENSG00000110367 | UAUAUGA |
| ENSG00000110367 | UCAUAGA |
| ENSG00000110367 | UCCAGUU |
| ENSG00000110367 | UGACCUA |
| ENSG00000110367 | UGCAUUA |
| ENSG00000110367 | UGCCAGC |
| ENSG00000110367 | UGGAGAU |
| ENSG00000110367 | UGGGACA |
| ENSG00000110367 | UGUGUCA |
| ENSG00000110375 | AGGGAGG |
| ENSG00000110395 | AAAUCCC |
| ENSG00000110395 | AACAAAC |



|                 |          |
|-----------------|----------|
| ENSG00000110395 | AAGUCAC  |
| ENSG00000110395 | AAUCUCA  |
| ENSG00000110395 | AGCAGCU  |
| ENSG00000110395 | AGUGCUG  |
| ENSG00000110395 | AGUGC UU |
| ENSG00000110395 | AGUGUGC  |
| ENSG00000110395 | AUACAAG  |
| ENSG00000110395 | AUAU AAC |
| ENSG00000110395 | AUGCACC  |
| ENSG00000110395 | CAGUAGA  |
| ENSG00000110395 | CAUGGGU  |
| ENSG00000110395 | CCAGUGU  |
| ENSG00000110395 | CUCCA UU |
| ENSG00000110395 | CUUUGGU  |
| ENSG00000110395 | GAGAUGA  |
| ENSG00000110395 | GAGGUAG  |
| ENSG00000110395 | GAGGU AU |
| ENSG00000110395 | GCAGGUU  |
| ENSG00000110395 | GCUACA U |
| ENSG00000110395 | GGACUGC  |
| ENSG00000110395 | GGAGGCA  |
| ENSG00000110395 | GGAGUGU  |
| ENSG00000110395 | GGCAAGA  |
| ENSG00000110395 | GGCAGGG  |
| ENSG00000110395 | GGGGAGC  |
| ENSG00000110395 | GUCAACA  |
| ENSG00000110395 | GUGACAG  |
| ENSG00000110395 | GUGAGGU  |
| ENSG00000110395 | GUGCUUG  |
| ENSG00000110395 | UCAACAG  |
| ENSG00000110395 | UCUCAAG  |
| ENSG00000110395 | UGAAAGG  |
| ENSG00000110395 | UGAAAUG  |
| ENSG00000110395 | UGGACUG  |
| ENSG00000110395 | UGGGACA  |
| ENSG00000110395 | UGUGC UU |
| ENSG00000110395 | UGUUGAA  |
| ENSG00000110395 | UUGGAGG  |
| ENSG00000110400 | AAAAGUA  |
| ENSG00000110400 | AAUACUG  |
| ENSG00000110400 | AGCACCA  |
| ENSG00000110400 | AGCAGCA  |
| ENSG00000110400 | AUGGCUU  |
| ENSG00000110400 | AUUGCAC  |
| ENSG00000110400 | CCAGGAG  |
| ENSG00000110400 | CCAGUGC  |
| ENSG00000110400 | CCAGUGU  |
| ENSG00000110400 | CUGGCUC  |
| ENSG00000110400 | GAGGCAG  |
| ENSG00000110400 | GCAGCAU  |
| ENSG00000110400 | GCUACA U |
| ENSG00000110400 | GGAAGCC  |
| ENSG00000110400 | GGCAGGG  |
| ENSG00000110400 | GGGCGUG  |
| ENSG00000110400 | GGGGUGG  |
| ENSG00000110400 | GUGCUUG  |
| ENSG00000110400 | UAUAAAG  |
| ENSG00000110400 | UAUUGCU  |
| ENSG00000110400 | UCCAGUU  |
| ENSG00000110400 | UGUGC UU |
| ENSG00000110422 | AAAGCUG  |
| ENSG00000110422 | AACAUUC  |
| ENSG00000110422 | AAGUGCA  |
| ENSG00000110422 | AGCAAAA  |

|                 |         |
|-----------------|---------|
| ENSG00000110422 | AGUGCUG |
| ENSG00000110422 | AUGGCUU |
| ENSG00000110422 | AUUGCAC |
| ENSG00000110422 | CAGCAGA |
| ENSG00000110422 | CGUGUCU |
| ENSG00000110422 | CUAGGCU |
| ENSG00000110422 | CUUGUGU |
| ENSG00000110422 | GUGCCAC |
| ENSG00000110422 | UGCAGCU |
| ENSG00000110427 | AAAGUAC |
| ENSG00000110427 | AACAAAC |
| ENSG00000110427 | AACACUG |
| ENSG00000110427 | AAGUGCA |
| ENSG00000110427 | ACUGGCC |
| ENSG00000110427 | AGCACCA |
| ENSG00000110427 | AGUAACA |
| ENSG00000110427 | AGUACUG |
| ENSG00000110427 | AGUAGAC |
| ENSG00000110427 | AUGACAC |
| ENSG00000110427 | AUUCAUU |
| ENSG00000110427 | CACAGUG |
| ENSG00000110427 | CAGCAA  |
| ENSG00000110427 | CAUGGGU |
| ENSG00000110427 | CCAGCAU |
| ENSG00000110427 | CUAUACA |
| ENSG00000110427 | CUCAGGG |
| ENSG00000110427 | CUUUGGU |
| ENSG00000110427 | GGCAAGA |
| ENSG00000110427 | GGCUCAG |
| ENSG00000110427 | GUUCAUG |
| ENSG00000110427 | UAUCAGA |
| ENSG00000110427 | UCAAGUA |
| ENSG00000110427 | UCAUUCG |
| ENSG00000110427 | UGAAGCU |
| ENSG00000110427 | UGGACUG |
| ENSG00000110427 | UGGGUGA |
| ENSG00000110427 | UUCUAAU |
| ENSG00000110427 | UUGUUCG |
| ENSG00000110429 | AAAAAUC |
| ENSG00000110429 | CAGCAGA |
| ENSG00000110429 | CAGGAAC |
| ENSG00000110429 | GAUUGUC |
| ENSG00000110429 | UAUAAAG |
| ENSG00000110435 | AGCACCA |
| ENSG00000110436 | AAAAGUA |
| ENSG00000110436 | AAAGUGC |
| ENSG00000110436 | AACAGUC |
| ENSG00000110436 | AAGUGCA |
| ENSG00000110436 | ACAUUAC |
| ENSG00000110436 | ACUGCAU |
| ENSG00000110436 | ACUGUGU |
| ENSG00000110436 | AGCACCA |
| ENSG00000110436 | AUGAUGC |
| ENSG00000110436 | AUGGCAC |
| ENSG00000110436 | CAAAGUG |
| ENSG00000110436 | CACUGUU |
| ENSG00000110436 | CUCCAGC |
| ENSG00000110436 | GAUCAGA |
| ENSG00000110436 | GCUACAU |
| ENSG00000110436 | UAGUGAG |
| ENSG00000110436 | UGCAUAG |
| ENSG00000110436 | UGCCAGC |
| ENSG00000110442 | ACCAGCA |
| ENSG00000110448 | GACCUGG |

|                 |          |
|-----------------|----------|
| ENSG00000110448 | UACAAAG  |
| ENSG00000110484 | UCAACAG  |
| ENSG00000110484 | UUUCAAC  |
| ENSG00000110492 | AAAGCUG  |
| ENSG00000110492 | AAGGCAC  |
| ENSG00000110492 | AUCCCUU  |
| ENSG00000110492 | GGGGUGG  |
| ENSG00000110497 | AAAAACC  |
| ENSG00000110497 | AAUACUG  |
| ENSG00000110497 | ACCUGGA  |
| ENSG00000110497 | CAGCUGG  |
| ENSG00000110497 | CCCACCG  |
| ENSG00000110497 | CCCACCU  |
| ENSG00000110497 | CUCCCAC  |
| ENSG00000110497 | GAGGGGC  |
| ENSG00000110497 | GUGAGGU  |
| ENSG00000110497 | UACAAAG  |
| ENSG00000110497 | UACAGUU  |
| ENSG00000110497 | UCCCACC  |
| ENSG00000110497 | UCCUCU   |
| ENSG00000110497 | UCUCCAA  |
| ENSG00000110514 | ACAUUCA  |
| ENSG00000110675 | AAUACUG  |
| ENSG00000110675 | ACUGCAU  |
| ENSG00000110675 | CAUGGGU  |
| ENSG00000110675 | GAGAAAU  |
| ENSG00000110675 | GCUAGCA  |
| ENSG00000110675 | GUAACAG  |
| ENSG00000110675 | UCACAGG  |
| ENSG00000110675 | UCACAGU  |
| ENSG00000110675 | UGAAAUG  |
| ENSG00000110693 | AACCUGU  |
| ENSG00000110693 | AUAUUAU  |
| ENSG00000110693 | GAUUGUC  |
| ENSG00000110693 | UCACAAG  |
| ENSG00000110693 | UGAGAAU  |
| ENSG00000110693 | UUCAAGC  |
| ENSG00000110693 | UUGUUCG  |
| ENSG00000110693 | UUUGCAA  |
| ENSG00000110711 | AGAUAAA  |
| ENSG00000110713 | AGCCCUU  |
| ENSG00000110713 | GACCAUG  |
| ENSG00000110713 | GCCCUUA  |
| ENSG00000110713 | UCCAGAG  |
| ENSG00000110721 | AGCAGCU  |
| ENSG00000110721 | AGUAACA  |
| ENSG00000110721 | GUAAACA  |
| ENSG00000110721 | UCACAGG  |
| ENSG00000110721 | UCACAGU  |
| ENSG00000110721 | UCAUACA  |
| ENSG00000110756 | AAGUGCA  |
| ENSG00000110756 | CCUGCUG  |
| ENSG00000110768 | ACCCUGU  |
| ENSG00000110768 | ACUGCAG  |
| ENSG00000110768 | AGUGCAA  |
| ENSG00000110768 | GUAAACA  |
| ENSG00000110786 | CAGACAG  |
| ENSG00000110786 | CAGCAAA  |
| ENSG00000110786 | UAUAAAAG |
| ENSG00000110786 | UCCCACA  |
| ENSG00000110786 | UGUCUGC  |
| ENSG00000110801 | CAGCUGG  |
| ENSG00000110801 | CUCUCC   |
| ENSG00000110801 | CUUUGGU  |

|                 |         |
|-----------------|---------|
| ENSG00000110801 | GUAAACA |
| ENSG00000110841 | AACAGUC |
| ENSG00000110841 | AAGACAU |
| ENSG00000110841 | ACCAGCA |
| ENSG00000110841 | AUAUAAC |
| ENSG00000110841 | CAGCUGG |
| ENSG00000110841 | GAGAAAU |
| ENSG00000110841 | GCAACUU |
| ENSG00000110841 | UCACCAC |
| ENSG00000110844 | GGACUGC |
| ENSG00000110848 | AAGUGCA |
| ENSG00000110851 | AAGUGCA |
| ENSG00000110851 | ACAUUAC |
| ENSG00000110851 | AGCAAAA |
| ENSG00000110851 | AGCAGCG |
| ENSG00000110851 | AGCAGCU |
| ENSG00000110851 | AGUGCUU |
| ENSG00000110851 | AUAUAAC |
| ENSG00000110851 | CCCACCG |
| ENSG00000110851 | CCCACCU |
| ENSG00000110851 | UAGAGGA |
| ENSG00000110851 | UUCCUAG |
| ENSG00000110871 | UUCAAAU |
| ENSG00000110880 | AACACUG |
| ENSG00000110880 | AAUACUG |
| ENSG00000110880 | ACUGCAU |
| ENSG00000110880 | ACUGGAU |
| ENSG00000110880 | AGUGCCU |
| ENSG00000110880 | AGUGCUG |
| ENSG00000110880 | CACAGUG |
| ENSG00000110880 | CCUGAG  |
| ENSG00000110880 | CUUGGGC |
| ENSG00000110880 | GAUUGUA |
| ENSG00000110880 | GAUUGUC |
| ENSG00000110880 | GCUGUCU |
| ENSG00000110880 | GGAAGCC |
| ENSG00000110880 | GGCAGUG |
| ENSG00000110880 | UAUAAAG |
| ENSG00000110880 | UCAUUUG |
| ENSG00000110880 | UUGACAC |
| ENSG00000110880 | UUGAUCA |
| ENSG00000110880 | UUGGCAC |
| ENSG00000110880 | UUGGUCC |
| ENSG00000110880 | UUGGUUC |
| ENSG00000110881 | ACAGUAC |
| ENSG00000110881 | CCUGAG  |
| ENSG00000110881 | CCUGCUG |
| ENSG00000110881 | CUUUGGU |
| ENSG00000110881 | GCUUCCU |
| ENSG00000110881 | GGGAGCU |
| ENSG00000110881 | GGGGCAG |
| ENSG00000110881 | GUGCUUG |
| ENSG00000110881 | UCACAGG |
| ENSG00000110881 | UCACAGU |
| ENSG00000110881 | UGUGCUU |
| ENSG00000110888 | AAGUGCU |
| ENSG00000110888 | AGUGCUG |
| ENSG00000110888 | AGUGCUU |
| ENSG00000110888 | GCUACAU |
| ENSG00000110888 | GGCAUUG |
| ENSG00000110888 | GUGCAAA |
| ENSG00000110888 | UACAGUU |
| ENSG00000110888 | UCACAGG |
| ENSG00000110888 | UCACAGU |

|                 |          |
|-----------------|----------|
| ENSG00000110906 | AACUACU  |
| ENSG00000110906 | ACAGUAU  |
| ENSG00000110906 | AGCCUGC  |
| ENSG00000110906 | AGGGUUG  |
| ENSG00000110906 | CUCCAGC  |
| ENSG00000110906 | CUUUGGU  |
| ENSG00000110906 | GAGAACC  |
| ENSG00000110906 | GAGGUAG  |
| ENSG00000110906 | UACAAAG  |
| ENSG00000110906 | UCUCACC  |
| ENSG00000110906 | UCCCAUA  |
| ENSG00000110911 | ACUGGCU  |
| ENSG00000110911 | CAGGCUC  |
| ENSG00000110911 | CUGACUC  |
| ENSG00000110911 | CUGGCUC  |
| ENSG00000110911 | GUGCAAA  |
| ENSG00000110911 | UCCCUCU  |
| ENSG00000110911 | UCCUGAG  |
| ENSG00000110931 | AAGGUGC  |
| ENSG00000110931 | AGCACCA  |
| ENSG00000110931 | AGCCCUU  |
| ENSG00000110931 | AGUAGAC  |
| ENSG00000110931 | AUGUAU   |
| ENSG00000110931 | AUUGCAC  |
| ENSG00000110931 | CAAGAGC  |
| ENSG00000110931 | CAGCUGG  |
| ENSG00000110931 | CUUCUCU  |
| ENSG00000110931 | CUUUGGU  |
| ENSG00000110931 | GCACCAU  |
| ENSG00000110931 | GCUUCCU  |
| ENSG00000110931 | GUAAACA  |
| ENSG00000110931 | UAUUGCU  |
| ENSG00000110931 | UGUGCUU  |
| ENSG00000110931 | UUGGCAA  |
| ENSG00000110931 | UUGGCAC  |
| ENSG00000110934 | AGCCUGC  |
| ENSG00000110944 | UCCCUUG  |
| ENSG00000110944 | UCCCUUU  |
| ENSG00000110958 | AAAUCCC  |
| ENSG00000110958 | AGUGCAA  |
| ENSG00000110958 | CAGUGCA  |
| ENSG00000110958 | GUGCAAA  |
| ENSG00000110975 | AGUGCAA  |
| ENSG00000110975 | CUUUGGU  |
| ENSG00000110975 | UGCAUUAU |
| ENSG00000110975 | UUGGAGG  |
| ENSG00000110987 | AACAUUC  |
| ENSG00000110987 | AAGGCAC  |
| ENSG00000110987 | AAGUGCA  |
| ENSG00000110987 | AAGUGCU  |
| ENSG00000110987 | AGCAGCA  |
| ENSG00000110987 | AGCCCUU  |
| ENSG00000110987 | AUGCACC  |
| ENSG00000110987 | CACCACC  |
| ENSG00000110987 | CCAGUGC  |
| ENSG00000110987 | CUUGGAG  |
| ENSG00000110987 | GAGCCCU  |
| ENSG00000110987 | GAGGUAG  |
| ENSG00000110987 | GAGGUUAU |
| ENSG00000110987 | GGAAUGU  |
| ENSG00000110987 | GGAUUUC  |
| ENSG00000110987 | GUGCAAA  |
| ENSG00000110987 | UCACAGG  |
| ENSG00000110987 | UCACAGU  |

|                 |          |
|-----------------|----------|
| ENSG00000110987 | UCACCAC  |
| ENSG00000110987 | UCCCUUG  |
| ENSG00000110987 | UCCCUUU  |
| ENSG00000110987 | UCCUGAG  |
| ENSG00000110987 | UGAGAAG  |
| ENSG00000110987 | UGCCAGC  |
| ENSG00000110987 | UUUGCAA  |
| ENSG00000111011 | AAAGUAC  |
| ENSG00000111011 | UACAAAG  |
| ENSG00000111012 | AGCCAGU  |
| ENSG00000111046 | UACAAAG  |
| ENSG00000111049 | AAAGUGC  |
| ENSG00000111049 | AGGCAGG  |
| ENSG00000111077 | CUGCAGC  |
| ENSG00000111077 | UGCAGCU  |
| ENSG00000111077 | UGCUCAC  |
| ENSG00000111110 | AAAGCUG  |
| ENSG00000111110 | AGCAGCA  |
| ENSG00000111110 | AGCAGCG  |
| ENSG00000111110 | AGCAGCU  |
| ENSG00000111110 | AUAU AAC |
| ENSG00000111110 | AUUGCAC  |
| ENSG00000111110 | CCCCUGG  |
| ENSG00000111110 | CCUUCAU  |
| ENSG00000111110 | UACAAAG  |
| ENSG00000111110 | UCAAGUA  |
| ENSG00000111110 | UCACAGU  |
| ENSG00000111110 | UCCUGAG  |
| ENSG00000111110 | UUGGUCC  |
| ENSG00000111142 | ACAUUAC  |
| ENSG00000111142 | AUGGAUU  |
| ENSG00000111142 | CAAAACU  |
| ENSG00000111142 | CCAGGAG  |
| ENSG00000111142 | UGGAUAA  |
| ENSG00000111142 | UGUCUUU  |
| ENSG00000111145 | GUGCAAA  |
| ENSG00000111181 | GGCCUG   |
| ENSG00000111186 | AGCAGCA  |
| ENSG00000111186 | AUAUAC   |
| ENSG00000111186 | AUACAAG  |
| ENSG00000111186 | AUAU AAC |
| ENSG00000111199 | UCCUGAG  |
| ENSG00000111199 | UGAAAUG  |
| ENSG00000111206 | CCUGCUG  |
| ENSG00000111206 | GGAUUUC  |
| ENSG00000111218 | GCAGCAU  |
| ENSG00000111224 | AAAAGUA  |
| ENSG00000111224 | CAAAGCA  |
| ENSG00000111241 | GUGCAAA  |
| ENSG00000111249 | AAGUGCA  |
| ENSG00000111249 | AGCCUGC  |
| ENSG00000111249 | AGUCUUU  |
| ENSG00000111249 | AUACAAG  |
| ENSG00000111249 | AUCCUUU  |
| ENSG00000111249 | AUGGCUU  |
| ENSG00000111249 | CAGACAG  |
| ENSG00000111249 | CAGUCUG  |
| ENSG00000111249 | CUACAAA  |
| ENSG00000111249 | CUCACAC  |
| ENSG00000111249 | CUGGAAA  |
| ENSG00000111249 | GAGUCUU  |
| ENSG00000111249 | UAAUAUC  |
| ENSG00000111249 | UGCAUAG  |
| ENSG00000111249 | UGGAUAA  |

|                 |          |
|-----------------|----------|
| ENSG00000111249 | UUAGAGA  |
| ENSG00000111249 | UUCUAAU  |
| ENSG00000111249 | UUGGUCC  |
| ENSG00000111252 | AAACUGU  |
| ENSG00000111252 | AAGGCAC  |
| ENSG00000111252 | AAUCCUU  |
| ENSG00000111252 | ACAGUAU  |
| ENSG00000111252 | ACAUUAC  |
| ENSG00000111252 | AGAUAAA  |
| ENSG00000111252 | AGGCAGG  |
| ENSG00000111252 | AUACAAG  |
| ENSG00000111252 | AUCCUUU  |
| ENSG00000111252 | AUGGAUU  |
| ENSG00000111252 | CAGUGCA  |
| ENSG00000111252 | CCCUGAG  |
| ENSG00000111252 | CCUUCUG  |
| ENSG00000111252 | CUCUGGG  |
| ENSG00000111252 | CUUUGGU  |
| ENSG00000111252 | GAAUUGU  |
| ENSG00000111252 | GAGGUAG  |
| ENSG00000111252 | GAGUAU   |
| ENSG00000111252 | GCAGAAG  |
| ENSG00000111252 | GCAGGUU  |
| ENSG00000111252 | GCUUCCU  |
| ENSG00000111252 | GGUCUAG  |
| ENSG00000111252 | GUGACUG  |
| ENSG00000111252 | UCAACAG  |
| ENSG00000111252 | UCACAUU  |
| ENSG00000111252 | UCCUGU   |
| ENSG00000111252 | UCCUGAG  |
| ENSG00000111252 | UGAAAGG  |
| ENSG00000111252 | UGACUGU  |
| ENSG00000111252 | UGCAUAG  |
| ENSG00000111252 | UGCAUAU  |
| ENSG00000111252 | UGCAUUG  |
| ENSG00000111254 | GGCUCUG  |
| ENSG00000111254 | UCCUUGC  |
| ENSG00000111261 | GAAGGAA  |
| ENSG00000111262 | AAGACAU  |
| ENSG00000111262 | AAGGCAC  |
| ENSG00000111262 | AAGUGCA  |
| ENSG00000111262 | AAGUGCU  |
| ENSG00000111262 | AAUGCCC  |
| ENSG00000111262 | ACAGUAU  |
| ENSG00000111262 | AGCAUUC  |
| ENSG00000111262 | AGCUUAU  |
| ENSG00000111262 | AGGCAGG  |
| ENSG00000111262 | AUGCAUU  |
| ENSG00000111262 | AUUGCAC  |
| ENSG00000111262 | CAGUCCA  |
| ENSG00000111262 | CCCUGAG  |
| ENSG00000111262 | CCUUCUG  |
| ENSG00000111262 | CUGUUGA  |
| ENSG00000111262 | CUUUGGU  |
| ENSG00000111262 | GAAAACA  |
| ENSG00000111262 | GCACCAU  |
| ENSG00000111262 | GCCCUGU  |
| ENSG00000111262 | GCUACAU  |
| ENSG00000111262 | GGAGGCA  |
| ENSG00000111262 | GGUUACC  |
| ENSG00000111262 | UAAUGCU  |
| ENSG00000111262 | UAUAAAAG |
| ENSG00000111262 | UAUUGCU  |
| ENSG00000111262 | UCCAGUU  |

|                 |          |
|-----------------|----------|
| ENSG00000111262 | UCCUGU   |
| ENSG00000111262 | UCCUUG   |
| ENSG00000111262 | UCCUUU   |
| ENSG00000111262 | UCUCACC  |
| ENSG00000111262 | UGGGUAC  |
| ENSG00000111262 | UGUCUGC  |
| ENSG00000111262 | UGUGCUU  |
| ENSG00000111262 | UUGGUCC  |
| ENSG00000111266 | AAGGUGC  |
| ENSG00000111266 | CUGGCUC  |
| ENSG00000111266 | GAGGUAU  |
| ENSG00000111266 | GGCUCAG  |
| ENSG00000111269 | AAGACAU  |
| ENSG00000111269 | AGCAGCU  |
| ENSG00000111269 | AGCUUUAU |
| ENSG00000111269 | CACUCCU  |
| ENSG00000111269 | CAGCAGA  |
| ENSG00000111269 | CUGGCUC  |
| ENSG00000111269 | CUUGUGU  |
| ENSG00000111269 | GAAAACA  |
| ENSG00000111269 | GCUGGAU  |
| ENSG00000111269 | GUGCAAA  |
| ENSG00000111269 | GUUCAUG  |
| ENSG00000111269 | UCAAGUA  |
| ENSG00000111269 | UUGGUUC  |
| ENSG00000111271 | CUGCAGC  |
| ENSG00000111276 | AGGUAGU  |
| ENSG00000111276 | AGUGCUU  |
| ENSG00000111319 | UCCUUGC  |
| ENSG00000111321 | AGCACCA  |
| ENSG00000111321 | CAGUCCA  |
| ENSG00000111328 | ACAUCAC  |
| ENSG00000111328 | UAUUACC  |
| ENSG00000111331 | GGGGUCC  |
| ENSG00000111344 | AGCAGCU  |
| ENSG00000111344 | AGUGCAA  |
| ENSG00000111344 | CAGUGCA  |
| ENSG00000111361 | CAGUCUG  |
| ENSG00000111371 | AAUGUUG  |
| ENSG00000111371 | AGUGCUG  |
| ENSG00000111371 | AUACAAG  |
| ENSG00000111371 | AUCACUA  |
| ENSG00000111371 | AUGAUGA  |
| ENSG00000111371 | GCUGGUG  |
| ENSG00000111371 | UCAAGUA  |
| ENSG00000111371 | UGACUGU  |
| ENSG00000111371 | UGCAUAG  |
| ENSG00000111371 | UGUGCUU  |
| ENSG00000111424 | AAGGCAC  |
| ENSG00000111424 | ACAUUAC  |
| ENSG00000111424 | CCCUGAG  |
| ENSG00000111424 | CUGCCCC  |
| ENSG00000111424 | GAAAACA  |
| ENSG00000111424 | GACUUCC  |
| ENSG00000111424 | UCACAUU  |
| ENSG00000111424 | UGCAGCU  |
| ENSG00000111432 | AAAGAAU  |
| ENSG00000111432 | AACAUUC  |
| ENSG00000111432 | AGCCCUU  |
| ENSG00000111432 | AGUGCUU  |
| ENSG00000111432 | AUAUUUAU |
| ENSG00000111432 | CAGCAAA  |
| ENSG00000111432 | CCAUUAC  |
| ENSG00000111432 | UACAAAG  |



|                 |          |
|-----------------|----------|
| ENSG00000111432 | UCCAU    |
| ENSG00000111450 | AAGGCAC  |
| ENSG00000111450 | CUUGGGC  |
| ENSG00000111450 | UACAAAG  |
| ENSG00000111481 | ACUCAGC  |
| ENSG00000111481 | CAGCAA   |
| ENSG00000111481 | CCCUGAG  |
| ENSG00000111481 | GAGGCAG  |
| ENSG00000111530 | AAUCCUU  |
| ENSG00000111530 | CUACAAA  |
| ENSG00000111540 | AAAACUG  |
| ENSG00000111540 | AAGUGCA  |
| ENSG00000111540 | ACAUUAC  |
| ENSG00000111540 | ACUCGAG  |
| ENSG00000111540 | AGCCCUU  |
| ENSG00000111540 | AGUGCAA  |
| ENSG00000111540 | AGUGUGC  |
| ENSG00000111540 | CAA AUGC |
| ENSG00000111540 | CAGCAGA  |
| ENSG00000111540 | CAGCAGG  |
| ENSG00000111540 | CCCCAG   |
| ENSG00000111540 | CCCCUGG  |
| ENSG00000111540 | CUGCAGG  |
| ENSG00000111540 | CUGCCCC  |
| ENSG00000111540 | CUUUGGU  |
| ENSG00000111540 | GAGGCAG  |
| ENSG00000111540 | GCCUGGA  |
| ENSG00000111540 | GCCUGGG  |
| ENSG00000111540 | GCUAGCA  |
| ENSG00000111540 | GGAGGCA  |
| ENSG00000111540 | GGCUCAG  |
| ENSG00000111540 | GGGAGCU  |
| ENSG00000111540 | GGGUCC   |
| ENSG00000111540 | GUCUUGC  |
| ENSG00000111540 | GUGCAA   |
| ENSG00000111540 | UAAUACA  |
| ENSG00000111540 | UACAAAG  |
| ENSG00000111540 | UAUAAUA  |
| ENSG00000111540 | UGCUGAC  |
| ENSG00000111554 | AUGUGCC  |
| ENSG00000111554 | GUGACAG  |
| ENSG00000111596 | AAAAAUC  |
| ENSG00000111596 | AAAUGGU  |
| ENSG00000111596 | AACAAAC  |
| ENSG00000111596 | AACAGUC  |
| ENSG00000111596 | AAGGCAC  |
| ENSG00000111596 | AAGUCUU  |
| ENSG00000111596 | ACAUUCA  |
| ENSG00000111596 | ACCAGCA  |
| ENSG00000111596 | AGGCAGG  |
| ENSG00000111596 | AGUGCAA  |
| ENSG00000111596 | AGUGCUG  |
| ENSG00000111596 | AGUGCUU  |
| ENSG00000111596 | AUAAUAC  |
| ENSG00000111596 | AUAUAAC  |
| ENSG00000111596 | AUGGAUU  |
| ENSG00000111596 | AUGUGGG  |
| ENSG00000111596 | AUUCAUU  |
| ENSG00000111596 | AUUGCAC  |
| ENSG00000111596 | CACACCU  |
| ENSG00000111596 | CACAGGG  |
| ENSG00000111596 | CAGCAGG  |
| ENSG00000111596 | CCCCUGG  |
| ENSG00000111596 | CUCAAAC  |

|                 |         |
|-----------------|---------|
| ENSG00000111596 | CUGCAGC |
| ENSG00000111596 | CUGCAGG |
| ENSG00000111596 | CUGCACA |
| ENSG00000111596 | CUUCACC |
| ENSG00000111596 | GAAGGAA |
| ENSG00000111596 | GACCCUG |
| ENSG00000111596 | GAGAAGA |
| ENSG00000111596 | GAGGUAG |
| ENSG00000111596 | GAGGUAU |
| ENSG00000111596 | GCAGGAC |
| ENSG00000111596 | GCAUCCC |
| ENSG00000111596 | GCCUGAU |
| ENSG00000111596 | GCUACAU |
| ENSG00000111596 | GGCCUG  |
| ENSG00000111596 | GGCGACA |
| ENSG00000111596 | GGCUGCG |
| ENSG00000111596 | GUCAGUU |
| ENSG00000111596 | GUCUGCC |
| ENSG00000111596 | UAUAAUA |
| ENSG00000111596 | UCCUAUA |
| ENSG00000111596 | UCUGGAG |
| ENSG00000111596 | UGAAGCU |
| ENSG00000111596 | UGCCAGC |
| ENSG00000111596 | UGCUCAC |
| ENSG00000111596 | UGGCCCU |
| ENSG00000111596 | UGGGUAC |
| ENSG00000111596 | UGUCUGC |
| ENSG00000111596 | UGUGCUU |
| ENSG00000111596 | UUCAAAU |
| ENSG00000111596 | UUCUGCA |
| ENSG00000111605 | AACAAAC |
| ENSG00000111605 | AACAGUC |
| ENSG00000111605 | AAUUGCU |
| ENSG00000111605 | AGAUAAA |
| ENSG00000111605 | AUCAUAC |
| ENSG00000111605 | CAUAUUG |
| ENSG00000111605 | CUAUACA |
| ENSG00000111605 | CUCUUCC |
| ENSG00000111605 | CUUUGGU |
| ENSG00000111605 | GCUGGAU |
| ENSG00000111605 | GUAUUCU |
| ENSG00000111605 | GUCUUGC |
| ENSG00000111605 | GUUCAUG |
| ENSG00000111605 | UAUUACC |
| ENSG00000111605 | UCACACA |
| ENSG00000111605 | UCAUUUG |
| ENSG00000111605 | UCCAGUU |
| ENSG00000111605 | UCCCUGU |
| ENSG00000111605 | UGCAAAG |
| ENSG00000111605 | UGCUGAC |
| ENSG00000111605 | UGUCUUU |
| ENSG00000111605 | UUGGCAC |
| ENSG00000111615 | AAUCCUU |
| ENSG00000111615 | AUCCUUU |
| ENSG00000111615 | CUCAAAC |
| ENSG00000111642 | AUACAAG |
| ENSG00000111642 | GAGGUAG |
| ENSG00000111642 | GUAACAG |
| ENSG00000111652 | AGCAGCA |
| ENSG00000111652 | CUGGGGG |
| ENSG00000111652 | GGCUCUG |
| ENSG00000111652 | GUAGUGU |
| ENSG00000111652 | UCAUAGA |
| ENSG00000111653 | AAACUGU |

|                 |          |
|-----------------|----------|
| ENSG00000111653 | CAAAGCA  |
| ENSG00000111653 | CAGCAGG  |
| ENSG00000111665 | UAAUAUC  |
| ENSG00000111667 | GGCAUUG  |
| ENSG00000111667 | UCACAUU  |
| ENSG00000111667 | UUGGCAA  |
| ENSG00000111667 | UUGGCAC  |
| ENSG00000111670 | AACUCUA  |
| ENSG00000111670 | CCUUCUU  |
| ENSG00000111670 | CUCUAGC  |
| ENSG00000111670 | GAGGUAU  |
| ENSG00000111670 | GGAAUGU  |
| ENSG00000111670 | UAUAAAAG |
| ENSG00000111670 | UCAUGAU  |
| ENSG00000111674 | CAGCUGG  |
| ENSG00000111676 | AAUUAUU  |
| ENSG00000111676 | AGGAUGU  |
| ENSG00000111676 | AUAUAAC  |
| ENSG00000111676 | GAGGAUA  |
| ENSG00000111676 | UUGGUUC  |
| ENSG00000111696 | GAGGCUG  |
| ENSG00000111696 | GGCAGCG  |
| ENSG00000111696 | UCUGGAG  |
| ENSG00000111696 | UGAGGAC  |
| ENSG00000111696 | UUGGCAC  |
| ENSG00000111707 | AAAGUUU  |
| ENSG00000111707 | ACUCCAG  |
| ENSG00000111707 | AGGUAGU  |
| ENSG00000111707 | CACAGGG  |
| ENSG00000111707 | UUCUAAU  |
| ENSG00000111711 | AAAGUUU  |
| ENSG00000111711 | AACAUUC  |
| ENSG00000111711 | AGCAGCA  |
| ENSG00000111711 | CUACAAA  |
| ENSG00000111711 | GAGGUAG  |
| ENSG00000111711 | GAGGUAU  |
| ENSG00000111711 | UGUGCUU  |
| ENSG00000111716 | UUGUUCG  |
| ENSG00000111725 | AAUACUG  |
| ENSG00000111725 | AGUGCAA  |
| ENSG00000111725 | GUGUGGC  |
| ENSG00000111725 | UAUUGCU  |
| ENSG00000111725 | UGCUGAC  |
| ENSG00000111728 | AAGGCAC  |
| ENSG00000111728 | ACCCUGU  |
| ENSG00000111728 | ACUUGGA  |
| ENSG00000111728 | CUGCUCU  |
| ENSG00000111728 | UCUAGAG  |
| ENSG00000111731 | UCAACAG  |
| ENSG00000111731 | UCAAGUA  |
| ENSG00000111731 | UGCAAAG  |
| ENSG00000111737 | AACGGCU  |
| ENSG00000111737 | AGCAAAA  |
| ENSG00000111737 | AGGGUCU  |
| ENSG00000111737 | CAGUCCA  |
| ENSG00000111737 | CAGUGCA  |
| ENSG00000111737 | CCUUCUU  |
| ENSG00000111737 | CUGCAGC  |
| ENSG00000111737 | CUGCAGG  |
| ENSG00000111737 | CUGGAAA  |
| ENSG00000111737 | GAUUGUA  |
| ENSG00000111737 | GAUUGUC  |
| ENSG00000111737 | GGCAGCG  |
| ENSG00000111737 | GUCUCUG  |

|                 |         |
|-----------------|---------|
| ENSG00000111737 | UCACAUU |
| ENSG00000111737 | UCCGCUC |
| ENSG00000111737 | UUGGCAC |
| ENSG00000111752 | AAAGAAU |
| ENSG00000111752 | ACCAGCA |
| ENSG00000111752 | ACUCCAG |
| ENSG00000111752 | ACUGGAU |
| ENSG00000111752 | AGCACCA |
| ENSG00000111752 | AGCUGCC |
| ENSG00000111752 | AGGCAGG |
| ENSG00000111752 | AUCCUUU |
| ENSG00000111752 | CACCAGC |
| ENSG00000111752 | CUCAGGG |
| ENSG00000111752 | CUGCAGC |
| ENSG00000111752 | CUGGCUC |
| ENSG00000111752 | GCAUCCC |
| ENSG00000111752 | GGCAGGG |
| ENSG00000111752 | GGCUCAG |
| ENSG00000111752 | UAGACUG |
| ENSG00000111752 | UGGACUG |
| ENSG00000111783 | ACCCAUU |
| ENSG00000111783 | GUGCAA  |
| ENSG00000111785 | AACAAAC |
| ENSG00000111785 | ACUGCAG |
| ENSG00000111785 | AGCAGCU |
| ENSG00000111785 | AGUGGUU |
| ENSG00000111785 | CAAAGCA |
| ENSG00000111785 | CAGGUGA |
| ENSG00000111785 | CCAGCAU |
| ENSG00000111785 | GAGAAAU |
| ENSG00000111785 | GGCAGUG |
| ENSG00000111785 | GUUAAUG |
| ENSG00000111785 | UCUCAAG |
| ENSG00000111785 | UGCAGCU |
| ENSG00000111785 | UGCCAGC |
| ENSG00000111785 | UUUCAAC |
| ENSG00000111790 | AGUAGUU |
| ENSG00000111790 | AUCCUUG |
| ENSG00000111790 | AUCCUUU |
| ENSG00000111790 | CAAAACU |
| ENSG00000111790 | UCCUGAG |
| ENSG00000111799 | CACAAUG |
| ENSG00000111799 | CAGUAGA |
| ENSG00000111799 | GGCUCUG |
| ENSG00000111799 | GUGCGCA |
| ENSG00000111799 | UCACAAG |
| ENSG00000111816 | AUGGCUU |
| ENSG00000111816 | UCAACAG |
| ENSG00000111817 | UUUGCAA |
| ENSG00000111817 | UUUGCAC |
| ENSG00000111837 | AAAGAAU |
| ENSG00000111837 | ACAGUAU |
| ENSG00000111837 | AGCAGCA |
| ENSG00000111837 | UCAACAG |
| ENSG00000111837 | UCCAGAG |
| ENSG00000111837 | UUGGCAC |
| ENSG00000111846 | ACAAUAU |
| ENSG00000111846 | ACAUUCA |
| ENSG00000111846 | AGUAGUU |
| ENSG00000111846 | AUAUUAU |
| ENSG00000111846 | CUUCUCU |
| ENSG00000111846 | GAGAAGA |
| ENSG00000111846 | GUGAGGU |
| ENSG00000111846 | UCAACAG |

|                 |          |
|-----------------|----------|
| ENSG00000111846 | UCCCUUG  |
| ENSG00000111850 | CUGCAGC  |
| ENSG00000111850 | UGCAGCU  |
| ENSG00000111859 | CCCUGAG  |
| ENSG00000111860 | AGCAGCA  |
| ENSG00000111860 | AGUAGUU  |
| ENSG00000111863 | CUUGGAG  |
| ENSG00000111875 | AAAAAUC  |
| ENSG00000111875 | AAGGCAC  |
| ENSG00000111875 | ACUGCAU  |
| ENSG00000111875 | AGCUUAU  |
| ENSG00000111875 | CUACAGU  |
| ENSG00000111875 | GAGAAGA  |
| ENSG00000111877 | AUGCCUU  |
| ENSG00000111880 | AAAACUG  |
| ENSG00000111880 | GGAAUGU  |
| ENSG00000111880 | UAUAAAG  |
| ENSG00000111885 | ACAUUAC  |
| ENSG00000111885 | AUGUGCC  |
| ENSG00000111885 | GAGGCUG  |
| ENSG00000111885 | GUCUCUG  |
| ENSG00000111885 | UAGAGGA  |
| ENSG00000111885 | UUUGCAC  |
| ENSG00000111885 | UUUUUGC  |
| ENSG00000111897 | AAUACUG  |
| ENSG00000111897 | ACCAGCA  |
| ENSG00000111912 | AAGGCAC  |
| ENSG00000111912 | AAGUGCA  |
| ENSG00000111912 | AAUACUG  |
| ENSG00000111912 | ACAGUAU  |
| ENSG00000111912 | ACUGCAU  |
| ENSG00000111912 | AGUGCUG  |
| ENSG00000111912 | CACAGUG  |
| ENSG00000111912 | CAGUUAC  |
| ENSG00000111912 | GAGGCAG  |
| ENSG00000111912 | UCACAGG  |
| ENSG00000111912 | UCCCUUG  |
| ENSG00000111913 | AAUUUUA  |
| ENSG00000111913 | AGCACCA  |
| ENSG00000111913 | CAA AUGC |
| ENSG00000111913 | CACAGUG  |
| ENSG00000111913 | CCCUGAG  |
| ENSG00000111913 | GAGAACC  |
| ENSG00000111913 | GAGAACU  |
| ENSG00000111913 | GCACCAU  |
| ENSG00000111913 | UACAAAG  |
| ENSG00000111913 | UAUAAAG  |
| ENSG00000111961 | AAAGCUG  |
| ENSG00000111961 | AAGAACC  |
| ENSG00000111961 | AAGGCAC  |
| ENSG00000111961 | AAUGUUG  |
| ENSG00000111961 | ACAGUAU  |
| ENSG00000111961 | ACAUUCA  |
| ENSG00000111961 | CAUAUUG  |
| ENSG00000111961 | UUCUUGU  |
| ENSG00000111962 | AGGUUAU  |
| ENSG00000111962 | AUAAUAC  |
| ENSG00000111962 | AUGUAAU  |
| ENSG00000111962 | AUGUGGG  |
| ENSG00000111962 | CACAGUG  |
| ENSG00000111962 | CUCCAC   |
| ENSG00000111962 | GUAAACA  |
| ENSG00000111962 | UAAUGCU  |
| ENSG00000111962 | UCAUGAU  |

|                 |          |
|-----------------|----------|
| ENSG00000111962 | UUGUUCG  |
| ENSG00000112033 | AAAAACC  |
| ENSG00000112033 | AAAGUGC  |
| ENSG00000112033 | AGCACCA  |
| ENSG00000112033 | AGUGCUU  |
| ENSG00000112033 | AUAUUAU  |
| ENSG00000112033 | CAGUGCA  |
| ENSG00000112033 | CUUUGGU  |
| ENSG00000112033 | GAGAAGA  |
| ENSG00000112033 | UUGGAGG  |
| ENSG00000112038 | GAGGUAG  |
| ENSG00000112039 | AAUUAUU  |
| ENSG00000112041 | AGAUGUG  |
| ENSG00000112041 | GUGACUG  |
| ENSG00000112062 | AGCUGCC  |
| ENSG00000112062 | CCCUGAG  |
| ENSG00000112062 | GGAGAGA  |
| ENSG00000112062 | UCACAGU  |
| ENSG00000112062 | UCCUAUA  |
| ENSG00000112062 | UGAAGUG  |
| ENSG00000112062 | UGGAGAU  |
| ENSG00000112078 | GCACCAU  |
| ENSG00000112078 | GCAUCCC  |
| ENSG00000112078 | GCCUGGA  |
| ENSG00000112078 | GCCUGGG  |
| ENSG00000112078 | UCCCUUU  |
| ENSG00000112078 | UGAAAGG  |
| ENSG00000112079 | AAGGCAC  |
| ENSG00000112079 | AAGUGCA  |
| ENSG00000112079 | AUAAAAGU |
| ENSG00000112079 | GCACCAU  |
| ENSG00000112079 | GUGCAAA  |
| ENSG00000112079 | UGUGCUU  |
| ENSG00000112081 | AAAGUAC  |
| ENSG00000112081 | AAAGUAU  |
| ENSG00000112081 | ACCUGGA  |
| ENSG00000112081 | AGCUUAU  |
| ENSG00000112081 | AUGGCUU  |
| ENSG00000112081 | CUACAAA  |
| ENSG00000112081 | CUCACAC  |
| ENSG00000112081 | CUGGACU  |
| ENSG00000112081 | GCACCAU  |
| ENSG00000112081 | GGAAUGU  |
| ENSG00000112081 | UGCAUUG  |
| ENSG00000112096 | CAAAGCA  |
| ENSG00000112096 | CUACAAA  |
| ENSG00000112116 | AAUUUUA  |
| ENSG00000112118 | UGCAAAG  |
| ENSG00000112130 | AACAAAC  |
| ENSG00000112130 | CAGGCUC  |
| ENSG00000112130 | GCCUGGA  |
| ENSG00000112130 | GGCUCAG  |
| ENSG00000112130 | GGCUGCG  |
| ENSG00000112130 | GUCUCUG  |
| ENSG00000112130 | UAAUAUC  |
| ENSG00000112130 | UGCAAAG  |
| ENSG00000112130 | UGGCUGC  |
| ENSG00000112139 | AAAGAAU  |
| ENSG00000112139 | AACACUG  |
| ENSG00000112139 | AAGGUGC  |
| ENSG00000112139 | ACUGCAG  |
| ENSG00000112139 | AGGAGCU  |
| ENSG00000112139 | CACAGUG  |
| ENSG00000112139 | CAGUCUG  |

|                 |         |
|-----------------|---------|
| ENSG00000112139 | CCCCUGG |
| ENSG00000112139 | CCCUGAG |
| ENSG00000112139 | CCUUCUG |
| ENSG00000112139 | CUGGGCA |
| ENSG00000112139 | CUUCUCU |
| ENSG00000112139 | GAGGCUG |
| ENSG00000112139 | GGAGGAG |
| ENSG00000112139 | GGCCUG  |
| ENSG00000112139 | GUGCUUG |
| ENSG00000112139 | UAAUAUC |
| ENSG00000112139 | UCACAGU |
| ENSG00000112139 | UGGGACA |
| ENSG00000112139 | UGGUACC |
| ENSG00000112144 | AACAUUC |
| ENSG00000112144 | AAGUUGU |
| ENSG00000112144 | AAUACUG |
| ENSG00000112144 | AUGGCAC |
| ENSG00000112144 | AUUGCAC |
| ENSG00000112144 | CAUAUUG |
| ENSG00000112144 | CUACAGU |
| ENSG00000112144 | GAAAACA |
| ENSG00000112144 | GAGGUAU |
| ENSG00000112144 | UAUUGCU |
| ENSG00000112144 | UCUGGAA |
| ENSG00000112144 | UGCAUUA |
| ENSG00000112144 | UUGGUCC |
| ENSG00000112146 | CAAACU  |
| ENSG00000112146 | CCAGUGC |
| ENSG00000112146 | CCAGUGU |
| ENSG00000112146 | UCUUGAG |
| ENSG00000112146 | UGAAAGG |
| ENSG00000112146 | UUCUUGU |
| ENSG00000112149 | AAUUAUU |
| ENSG00000112149 | AGUGCUG |
| ENSG00000112149 | CACACCG |
| ENSG00000112149 | CACACCU |
| ENSG00000112149 | CUCACAC |
| ENSG00000112149 | CUGGGCA |
| ENSG00000112149 | GGUUGAC |
| ENSG00000112149 | GGUUUAC |
| ENSG00000112149 | UCACACA |
| ENSG00000112149 | UCCCACA |
| ENSG00000112149 | UCCCACC |
| ENSG00000112164 | CCAGGAG |
| ENSG00000112164 | UCUUGAG |
| ENSG00000112164 | UGACCUA |
| ENSG00000112164 | UUCUCUG |
| ENSG00000112167 | ACACACU |
| ENSG00000112182 | AAAGAAU |
| ENSG00000112182 | AAAGGUA |
| ENSG00000112182 | AAAGUAU |
| ENSG00000112182 | AAAUGGU |
| ENSG00000112182 | AACCGG  |
| ENSG00000112182 | AAGAACC |
| ENSG00000112182 | AAGGCAC |
| ENSG00000112182 | AAUACUG |
| ENSG00000112182 | AAUGUUG |
| ENSG00000112182 | AAUUAUU |
| ENSG00000112182 | ACAGGUG |
| ENSG00000112182 | ACAGUAC |
| ENSG00000112182 | ACAUUAC |
| ENSG00000112182 | ACAUUCA |
| ENSG00000112182 | ACCCUGU |
| ENSG00000112182 | ACUGCAG |

|                 |         |
|-----------------|---------|
| ENSG00000112182 | AGCAGCA |
| ENSG00000112182 | AGGCAGG |
| ENSG00000112182 | AGGGUUG |
| ENSG00000112182 | AGUGCAA |
| ENSG00000112182 | AUAUAAC |
| ENSG00000112182 | AUGCAUU |
| ENSG00000112182 | AUGGAUU |
| ENSG00000112182 | AUGGCAC |
| ENSG00000112182 | AUGUCUG |
| ENSG00000112182 | CAAAACU |
| ENSG00000112182 | CACACCU |
| ENSG00000112182 | CAGACAG |
| ENSG00000112182 | CAGUGCA |
| ENSG00000112182 | CCAUUAC |
| ENSG00000112182 | CCCCCAG |
| ENSG00000112182 | CCCUGUC |
| ENSG00000112182 | CCCUGUU |
| ENSG00000112182 | CCUGCUG |
| ENSG00000112182 | CUGCAGC |
| ENSG00000112182 | CUGGAAA |
| ENSG00000112182 | GAGGCAG |
| ENSG00000112182 | GAGGGGC |
| ENSG00000112182 | GCAGCAU |
| ENSG00000112182 | GGAGUGU |
| ENSG00000112182 | GGAUGAG |
| ENSG00000112182 | GGCAUUG |
| ENSG00000112182 | GGGAGCU |
| ENSG00000112182 | GGGGAGC |
| ENSG00000112182 | GUAAACA |
| ENSG00000112182 | GUAGUGU |
| ENSG00000112182 | GUCAUUG |
| ENSG00000112182 | GUGACAG |
| ENSG00000112182 | GUUCAUG |
| ENSG00000112182 | UACAGUU |
| ENSG00000112182 | UAGAGGA |
| ENSG00000112182 | UAUUGCU |
| ENSG00000112182 | UCACAUU |
| ENSG00000112182 | UCAUACA |
| ENSG00000112182 | UCAUAGA |
| ENSG00000112182 | UCCAGAG |
| ENSG00000112182 | UCCCUGU |
| ENSG00000112182 | UCUGGAA |
| ENSG00000112182 | UCUGGAG |
| ENSG00000112182 | UGCAGCU |
| ENSG00000112182 | UGCAUAG |
| ENSG00000112182 | UUCAAGC |
| ENSG00000112182 | UUGAGGC |
| ENSG00000112182 | UUGGCAA |
| ENSG00000112182 | UUGGCAC |
| ENSG00000112182 | UUGUUCG |
| ENSG00000112183 | AAAACUG |
| ENSG00000112183 | AAUUUUA |
| ENSG00000112183 | ACCAGCA |
| ENSG00000112183 | AUAAAGU |
| ENSG00000112183 | CACCAGC |
| ENSG00000112183 | CAUAUUG |
| ENSG00000112183 | CCAGUGC |
| ENSG00000112183 | CCAGUGU |
| ENSG00000112183 | CUUGUAU |
| ENSG00000112183 | CUUUGGU |
| ENSG00000112183 | GAUUGUA |
| ENSG00000112183 | GUCAACA |
| ENSG00000112183 | GUGCCUG |
| ENSG00000112183 | UAAUAUC |



|                 |         |
|-----------------|---------|
| ENSG00000112183 | UAUUGCU |
| ENSG00000112183 | UCCCUUU |
| ENSG00000112183 | UGUAUGU |
| ENSG00000112183 | UGUCUGC |
| ENSG00000112183 | UGUCUGG |
| ENSG00000112183 | UUGUUCG |
| ENSG00000112195 | AGGACAC |
| ENSG00000112200 | AACAAAC |
| ENSG00000112200 | UAAUAUC |
| ENSG00000112200 | UGUGUGG |
| ENSG00000112210 | AAUACUG |
| ENSG00000112210 | UUGGCAA |
| ENSG00000112214 | CAGCAGA |
| ENSG00000112214 | UAGUGAG |
| ENSG00000112218 | AGCAGCG |
| ENSG00000112218 | AGCAGCU |
| ENSG00000112232 | AAAUUUC |
| ENSG00000112232 | AACACUG |
| ENSG00000112232 | CAGUUAC |
| ENSG00000112232 | GCUACAU |
| ENSG00000112232 | UCAUUUG |
| ENSG00000112232 | UCCUAUA |
| ENSG00000112232 | UUCCUAG |
| ENSG00000112232 | UUUCAAC |
| ENSG00000112238 | AAGGCAC |
| ENSG00000112238 | AAUUGCU |
| ENSG00000112238 | UUCAAAU |
| ENSG00000112242 | AAAGCUG |
| ENSG00000112242 | AAAGUGC |
| ENSG00000112242 | AACAAAC |
| ENSG00000112242 | AAGACAU |
| ENSG00000112242 | AAGGCAC |
| ENSG00000112242 | ACCCUGU |
| ENSG00000112242 | ACUGUUU |
| ENSG00000112242 | AGAUAAA |
| ENSG00000112242 | AGCAGCG |
| ENSG00000112242 | AGCCCUU |
| ENSG00000112242 | AGUACUG |
| ENSG00000112242 | AUGCACC |
| ENSG00000112242 | AUGCAUU |
| ENSG00000112242 | AUUGCAC |
| ENSG00000112242 | CACAGUG |
| ENSG00000112242 | CACCACC |
| ENSG00000112242 | CACUGUU |
| ENSG00000112242 | CAGGUGA |
| ENSG00000112242 | CAGUAGA |
| ENSG00000112242 | CAGUGCA |
| ENSG00000112242 | CCAGUAC |
| ENSG00000112242 | CCAGUGU |
| ENSG00000112242 | CCCUGAG |
| ENSG00000112242 | GAGCCCU |
| ENSG00000112242 | GAGGCAG |
| ENSG00000112242 | GCCCUUA |
| ENSG00000112242 | GCUGGUG |
| ENSG00000112242 | GGAAGCC |
| ENSG00000112242 | GGCACGG |
| ENSG00000112242 | GUAAACA |
| ENSG00000112242 | GUAACAG |
| ENSG00000112242 | UCCAGUU |
| ENSG00000112242 | UGCAUAG |
| ENSG00000112242 | UGCAUUA |
| ENSG00000112242 | UGCCUG  |
| ENSG00000112242 | UGGUACC |
| ENSG00000112242 | UUCAAAU |

|                 |          |
|-----------------|----------|
| ENSG00000112242 | UUGACAC  |
| ENSG00000112242 | UUGGAGG  |
| ENSG00000112245 | AACAUUC  |
| ENSG00000112245 | AAGUUGU  |
| ENSG00000112245 | AAUACUG  |
| ENSG00000112245 | AAUCUCA  |
| ENSG00000112245 | ACAAUUAU |
| ENSG00000112245 | ACAGUAU  |
| ENSG00000112245 | AGAUGUG  |
| ENSG00000112245 | CAAAGCA  |
| ENSG00000112245 | CAGACAG  |
| ENSG00000112245 | CCCUGUC  |
| ENSG00000112245 | CCCUGUU  |
| ENSG00000112245 | CUCCCAA  |
| ENSG00000112245 | CUCCCAC  |
| ENSG00000112245 | GCACCAU  |
| ENSG00000112245 | GCUGGUG  |
| ENSG00000112245 | GGAAGCC  |
| ENSG00000112245 | GGUCUAG  |
| ENSG00000112245 | GUGCAA   |
| ENSG00000112245 | GUGCUUG  |
| ENSG00000112245 | UAAGACU  |
| ENSG00000112245 | UAAUAGU  |
| ENSG00000112245 | UCAAGUA  |
| ENSG00000112245 | UCCACA   |
| ENSG00000112245 | UCCUGU   |
| ENSG00000112245 | UGUCUGC  |
| ENSG00000112245 | UGUCUGG  |
| ENSG00000112245 | UUGCAA   |
| ENSG00000112246 | GCUGGUG  |
| ENSG00000112246 | UCCUGAG  |
| ENSG00000112276 | CAGUCUG  |
| ENSG00000112276 | GCUGGUG  |
| ENSG00000112276 | UCAUACA  |
| ENSG00000112282 | UUAGAGA  |
| ENSG00000112290 | AAUACUG  |
| ENSG00000112290 | ACAAUUAU |
| ENSG00000112290 | AGCACCA  |
| ENSG00000112290 | AGCUGCC  |
| ENSG00000112290 | UUCAAAU  |
| ENSG00000112293 | CCAGGAG  |
| ENSG00000112294 | AGCUGCC  |
| ENSG00000112294 | UUGGUCC  |
| ENSG00000112297 | AGCACCA  |
| ENSG00000112305 | AGCAGCU  |
| ENSG00000112305 | CACAGUG  |
| ENSG00000112305 | GCACCAU  |
| ENSG00000112305 | GGAAUGU  |
| ENSG00000112305 | UCAUACA  |
| ENSG00000112308 | AAUACUG  |
| ENSG00000112308 | ACAGUAC  |
| ENSG00000112308 | ACAGUAU  |
| ENSG00000112308 | AUUGCAC  |
| ENSG00000112308 | CAGUAGU  |
| ENSG00000112308 | CUAUACA  |
| ENSG00000112308 | UGCAGCU  |
| ENSG00000112312 | AAAAAUC  |
| ENSG00000112319 | AAAAAUC  |
| ENSG00000112319 | AAAGCUG  |
| ENSG00000112319 | AAGACAU  |
| ENSG00000112319 | AAGUCAC  |
| ENSG00000112319 | AGGUAGU  |
| ENSG00000112319 | AUAAAGU  |
| ENSG00000112319 | CAGCAA   |

|                 |         |
|-----------------|---------|
| ENSG00000112319 | CAGCUGG |
| ENSG00000112319 | CAGUCUG |
| ENSG00000112319 | CUCAGGG |
| ENSG00000112319 | GCAUCC  |
| ENSG00000112319 | GGAAUGU |
| ENSG00000112319 | GUAACAG |
| ENSG00000112319 | GUCUUGC |
| ENSG00000112319 | UAAGACG |
| ENSG00000112319 | UAAGACU |
| ENSG00000112319 | UGAAAUG |
| ENSG00000112319 | UGAGGAC |
| ENSG00000112319 | UGUUGAA |
| ENSG00000112319 | UUGGUCC |
| ENSG00000112320 | AAAAACC |
| ENSG00000112320 | AAAGCUG |
| ENSG00000112320 | AAAGGUA |
| ENSG00000112320 | AAAGUAU |
| ENSG00000112320 | AAAGUGC |
| ENSG00000112320 | AAAUUUC |
| ENSG00000112320 | AAUUGCU |
| ENSG00000112320 | ACAAGGU |
| ENSG00000112320 | ACAGUAU |
| ENSG00000112320 | AGCAGCG |
| ENSG00000112320 | AGCAGCU |
| ENSG00000112320 | AUGGCAC |
| ENSG00000112320 | AUUGCAC |
| ENSG00000112320 | CAGCUGG |
| ENSG00000112320 | CCUGUU  |
| ENSG00000112320 | GAAACAU |
| ENSG00000112320 | GAGGAUA |
| ENSG00000112320 | GAUUGUC |
| ENSG00000112320 | GCUGGUG |
| ENSG00000112320 | GUAAACA |
| ENSG00000112320 | UACAAAG |
| ENSG00000112320 | UCACAAG |
| ENSG00000112320 | UGAAAGG |
| ENSG00000112320 | UUCUAAU |
| ENSG00000112333 | AAAGUAC |
| ENSG00000112333 | AAGUGCU |
| ENSG00000112333 | AGUGCUG |
| ENSG00000112333 | CUUUGGU |
| ENSG00000112333 | UCACAAG |
| ENSG00000112335 | UAUAAAG |
| ENSG00000112339 | AAAUCCC |
| ENSG00000112339 | AAUCUCA |
| ENSG00000112339 | UAAUACA |
| ENSG00000112339 | UUGGCAA |
| ENSG00000112378 | AAAUGGU |
| ENSG00000112378 | GGUUUAC |
| ENSG00000112379 | AAAUUUC |
| ENSG00000112379 | AAGGCAC |
| ENSG00000112379 | ACAGUAC |
| ENSG00000112379 | ACCAAU  |
| ENSG00000112379 | CCCUGAG |
| ENSG00000112379 | GAGAAAU |
| ENSG00000112379 | UCCCUGU |
| ENSG00000112394 | GAGGUAG |
| ENSG00000112406 | AAAGUGC |
| ENSG00000112406 | AAGACAU |
| ENSG00000112406 | AAGUGCA |
| ENSG00000112414 | CACAGUG |
| ENSG00000112414 | UCCAUA  |
| ENSG00000112419 | AAACUGU |
| ENSG00000112419 | ACAGUAU |

|                 |         |
|-----------------|---------|
| ENSG00000112419 | ACUUGGA |
| ENSG00000112419 | AGCACCA |
| ENSG00000112419 | AGCAGCG |
| ENSG00000112419 | AGCAGCU |
| ENSG00000112419 | CAGGAAC |
| ENSG00000112419 | CUGGAAA |
| ENSG00000112419 | GAAUUGU |
| ENSG00000112419 | GACCUGG |
| ENSG00000112419 | GAGGUAG |
| ENSG00000112419 | GAGGUAU |
| ENSG00000112419 | GCACCAU |
| ENSG00000112419 | GGAUUUC |
| ENSG00000112419 | GUAAACA |
| ENSG00000112419 | UCACAUU |
| ENSG00000112419 | UUCAAAU |
| ENSG00000112425 | GGAGGCA |
| ENSG00000112473 | AAUCACU |
| ENSG00000112511 | AAAGUGC |
| ENSG00000112511 | AACAAAC |
| ENSG00000112511 | CAGGAAC |
| ENSG00000112511 | GCCUGGG |
| ENSG00000112511 | GUAACAG |
| ENSG00000112511 | GUGAAUG |
| ENSG00000112511 | GUGAGGU |
| ENSG00000112511 | UCAUACA |
| ENSG00000112530 | ACAGUAC |
| ENSG00000112530 | ACAUCAC |
| ENSG00000112530 | UGACAUC |
| ENSG00000112531 | AACACUG |
| ENSG00000112531 | AACAGUC |
| ENSG00000112531 | ACAAUUA |
| ENSG00000112531 | ACAGUAC |
| ENSG00000112531 | ACAGUAU |
| ENSG00000112531 | ACAUUCA |
| ENSG00000112531 | AGUGCAA |
| ENSG00000112531 | CAGCAAA |
| ENSG00000112531 | CCUGCUG |
| ENSG00000112531 | GGAAUGU |
| ENSG00000112531 | GUGCAAA |
| ENSG00000112531 | UAAGACG |
| ENSG00000112531 | UCACAUU |
| ENSG00000112531 | UCAUGAU |
| ENSG00000112531 | UGCUGAC |
| ENSG00000112531 | UUCAAAU |
| ENSG00000112531 | UUGGUCC |
| ENSG00000112541 | AACAUUC |
| ENSG00000112541 | ACAUUCA |
| ENSG00000112541 | CAGCAAA |
| ENSG00000112559 | CACAGUG |
| ENSG00000112559 | GAGGUAG |
| ENSG00000112559 | UCACAGG |
| ENSG00000112559 | UCACAGU |
| ENSG00000112561 | AAGGCAC |
| ENSG00000112561 | CAAAGCA |
| ENSG00000112561 | UCACACA |
| ENSG00000112562 | AAAGUAA |
| ENSG00000112562 | AAAGUAU |
| ENSG00000112562 | AAUUUUA |
| ENSG00000112562 | AGCAAAA |
| ENSG00000112562 | AGUGGUU |
| ENSG00000112562 | GUAUGUU |
| ENSG00000112562 | UCACAGG |
| ENSG00000112562 | UCACAGU |
| ENSG00000112576 | AGCAGCG |

|                 |         |
|-----------------|---------|
| ENSG00000112576 | AGCAGCU |
| ENSG00000112576 | AGUGCAA |
| ENSG00000112576 | CACCAGC |
| ENSG00000112576 | GUCAACA |
| ENSG00000112576 | UCCUCU  |
| ENSG00000112592 | AAAAACC |
| ENSG00000112592 | AAUACUG |
| ENSG00000112592 | AGCAGCA |
| ENSG00000112592 | CACAGUG |
| ENSG00000112592 | GGAAUGU |
| ENSG00000112592 | UCACAGU |
| ENSG00000112599 | AACCUGG |
| ENSG00000112599 | CUGCUC  |
| ENSG00000112599 | UGCUCAC |
| ENSG00000112624 | AAAGUAA |
| ENSG00000112624 | AAAGUGC |
| ENSG00000112624 | AACAGUC |
| ENSG00000112624 | AAUCUCA |
| ENSG00000112624 | AAUCUCU |
| ENSG00000112624 | AGUGCUC |
| ENSG00000112624 | AUGGAUU |
| ENSG00000112624 | AUUGCAC |
| ENSG00000112624 | CUAUACA |
| ENSG00000112624 | CUUUGGU |
| ENSG00000112624 | GAAGGUC |
| ENSG00000112624 | GAUUGUA |
| ENSG00000112624 | GGUUGUC |
| ENSG00000112624 | UAUUGCU |
| ENSG00000112624 | UCAAGUA |
| ENSG00000112624 | UCCUGU  |
| ENSG00000112624 | UCUCAA  |
| ENSG00000112624 | UGGUCG  |
| ENSG00000112624 | UUCAAGC |
| ENSG00000112624 | UCCUAG  |
| ENSG00000112624 | UUGGCAC |
| ENSG00000112624 | UUGGUUC |
| ENSG00000112624 | UUUCAAC |
| ENSG00000112640 | CACAGGG |
| ENSG00000112640 | CUGCAGG |
| ENSG00000112640 | CUUUGGU |
| ENSG00000112640 | GGCCUG  |
| ENSG00000112640 | GGGUGGU |
| ENSG00000112640 | GGUGGUC |
| ENSG00000112640 | GUGGCC  |
| ENSG00000112640 | UUGGUCC |
| ENSG00000112655 | AGCAGCG |
| ENSG00000112655 | CCUUCAU |
| ENSG00000112655 | GGUUACC |
| ENSG00000112658 | AAAGAAU |
| ENSG00000112658 | AAUACUG |
| ENSG00000112658 | ACAGUAC |
| ENSG00000112658 | ACAGUAU |
| ENSG00000112658 | ACAUAGA |
| ENSG00000112658 | ACAUUCA |
| ENSG00000112658 | AGCUGCC |
| ENSG00000112658 | AUAAAGU |
| ENSG00000112658 | CCCUGAG |
| ENSG00000112658 | CCUGUAC |
| ENSG00000112658 | CUCAAAC |
| ENSG00000112658 | CUCUUC  |
| ENSG00000112658 | CUGCUC  |
| ENSG00000112658 | CUGGCUC |
| ENSG00000112658 | CUGGGCA |
| ENSG00000112658 | CUUUGGU |

|                 |          |
|-----------------|----------|
| ENSG00000112658 | GACUCC   |
| ENSG00000112658 | GAGGGGC  |
| ENSG00000112658 | GCAACUU  |
| ENSG00000112658 | GCAUCC   |
| ENSG00000112658 | GGCACGG  |
| ENSG00000112658 | GGGGUGG  |
| ENSG00000112658 | UACAGUU  |
| ENSG00000112658 | UCCCUCU  |
| ENSG00000112658 | UGAAAGG  |
| ENSG00000112658 | UGCUCAC  |
| ENSG00000112658 | UGUCUUU  |
| ENSG00000112679 | UUGGCAA  |
| ENSG00000112679 | UUGGCAC  |
| ENSG00000112685 | CUGCAGC  |
| ENSG00000112685 | GAGAAAU  |
| ENSG00000112695 | UGAUCCA  |
| ENSG00000112697 | ACAUUAC  |
| ENSG00000112697 | ACUGGCC  |
| ENSG00000112697 | GUGUGGC  |
| ENSG00000112699 | CUACAAA  |
| ENSG00000112701 | CUAGUAA  |
| ENSG00000112701 | CUAGUAG  |
| ENSG00000112701 | CUGGAAA  |
| ENSG00000112715 | AAAAAUC  |
| ENSG00000112715 | AAAGUGC  |
| ENSG00000112715 | AACAUUC  |
| ENSG00000112715 | AAGUGCU  |
| ENSG00000112715 | AAUUAUU  |
| ENSG00000112715 | AGCAGCG  |
| ENSG00000112715 | AGCAGCU  |
| ENSG00000112715 | AGUGGUU  |
| ENSG00000112715 | CAAAGUG  |
| ENSG00000112715 | CCAGUGC  |
| ENSG00000112715 | CCAGUGU  |
| ENSG00000112715 | GAUCAGA  |
| ENSG00000112715 | GGAAUGU  |
| ENSG00000112715 | UAUUACC  |
| ENSG00000112715 | UCACACA  |
| ENSG00000112715 | UCAUUUG  |
| ENSG00000112715 | UGAAAUG  |
| ENSG00000112727 | AAAGAGC  |
| ENSG00000112739 | AAAGGUA  |
| ENSG00000112739 | AAGGCGC  |
| ENSG00000112739 | ACAAUUAU |
| ENSG00000112739 | ACCAGCA  |
| ENSG00000112739 | ACUGUUU  |
| ENSG00000112739 | AGCAGCU  |
| ENSG00000112739 | AGCUUAU  |
| ENSG00000112739 | AGGCAGG  |
| ENSG00000112739 | AUGCCUU  |
| ENSG00000112739 | CAAGAGC  |
| ENSG00000112739 | CACACCU  |
| ENSG00000112739 | CAGGCUC  |
| ENSG00000112739 | CUCAAAC  |
| ENSG00000112739 | CUUCACC  |
| ENSG00000112739 | GAAGGAA  |
| ENSG00000112739 | GAGCUGC  |
| ENSG00000112739 | GCAACUU  |
| ENSG00000112739 | GCACCAU  |
| ENSG00000112739 | GCUGUCU  |
| ENSG00000112739 | UACAAAG  |
| ENSG00000112739 | UCACAAG  |
| ENSG00000112739 | UCACAUU  |
| ENSG00000112739 | UGAAAGG  |

|                 |         |
|-----------------|---------|
| ENSG00000112759 | AAGGCAC |
| ENSG00000112769 | AUCCCUU |
| ENSG00000112769 | CACUCCU |
| ENSG00000112769 | CAGUGCA |
| ENSG00000112773 | AGUGGUU |
| ENSG00000112773 | CCCUGAG |
| ENSG00000112773 | CUUUGGU |
| ENSG00000112773 | GGCAGUG |
| ENSG00000112773 | GUGCAAA |
| ENSG00000112773 | UCACAUU |
| ENSG00000112782 | AAACUGU |
| ENSG00000112782 | AAAGGUA |
| ENSG00000112782 | AACACUG |
| ENSG00000112782 | AGGCAGG |
| ENSG00000112782 | AUCCCUU |
| ENSG00000112782 | CUCUCC  |
| ENSG00000112782 | GAAAACA |
| ENSG00000112782 | GAGAAAU |
| ENSG00000112782 | GAGGCAG |
| ENSG00000112782 | GCUUCCU |
| ENSG00000112782 | GGAGGCA |
| ENSG00000112782 | UGUUGAA |
| ENSG00000112782 | UUGGCAA |
| ENSG00000112782 | UUGGCAC |
| ENSG00000112796 | AUAAAGU |
| ENSG00000112796 | UGCAAAG |
| ENSG00000112837 | ACAGUAC |
| ENSG00000112837 | UACAGUU |
| ENSG00000112851 | AGCCCUU |
| ENSG00000112851 | AGUGGUU |
| ENSG00000112851 | CUUUGGU |
| ENSG00000112851 | UCCUAUA |
| ENSG00000112855 | GUCUCUG |
| ENSG00000112874 | AAAUUUC |
| ENSG00000112874 | AGAUAAA |
| ENSG00000112874 | AUAUUAU |
| ENSG00000112893 | CACAGUG |
| ENSG00000112893 | UAUUGCU |
| ENSG00000112893 | UCAAGUA |
| ENSG00000112893 | UCACAGU |
| ENSG00000112893 | UGUGCUU |
| ENSG00000112902 | AAUUAUU |
| ENSG00000112902 | ACUGGCU |
| ENSG00000112902 | ACUGUAG |
| ENSG00000112902 | AGUGCCU |
| ENSG00000112902 | GCAGAAG |
| ENSG00000112902 | GGAGGCA |
| ENSG00000112902 | GGCAGCG |
| ENSG00000112902 | GGCUCAG |
| ENSG00000112902 | GUCAACA |
| ENSG00000112902 | UCCUGAG |
| ENSG00000112902 | UGAGGAC |
| ENSG00000112902 | UGGGACA |
| ENSG00000112902 | UGUGCUU |
| ENSG00000112902 | UUCCAUU |
| ENSG00000112902 | UUGGCAA |
| ENSG00000112902 | UUGGCAC |
| ENSG00000112964 | AAAGUAC |
| ENSG00000112964 | ACAUUAC |
| ENSG00000112964 | AGCAGCG |
| ENSG00000112964 | AGCAGCU |
| ENSG00000112964 | AUGGCUU |
| ENSG00000112964 | GAGGUAG |
| ENSG00000112964 | UUCAAAU |

|                 |          |
|-----------------|----------|
| ENSG00000112972 | AGAUAAA  |
| ENSG00000112972 | AGCACCA  |
| ENSG00000112972 | AGCCCUU  |
| ENSG00000112972 | AUAAAAGU |
| ENSG00000112972 | AUGCACC  |
| ENSG00000112972 | GAGCCCU  |
| ENSG00000112972 | GAGGUAU  |
| ENSG00000112972 | GCCCUUA  |
| ENSG00000112972 | GUGCCAC  |
| ENSG00000112972 | UACAAAG  |
| ENSG00000112972 | UCACAGG  |
| ENSG00000112972 | UGCAAAG  |
| ENSG00000112977 | AAGGCAC  |
| ENSG00000112977 | GGAAUGU  |
| ENSG00000112992 | AAAGUUU  |
| ENSG00000112992 | GAGGUAG  |
| ENSG00000113013 | AAUACUG  |
| ENSG00000113013 | ACUGCAG  |
| ENSG00000113013 | ACUGCAU  |
| ENSG00000113013 | CAGGAAC  |
| ENSG00000113070 | AAAAACC  |
| ENSG00000113070 | AACAAAC  |
| ENSG00000113070 | AGCACCA  |
| ENSG00000113070 | AGUAACA  |
| ENSG00000113070 | AUAU AAC |
| ENSG00000113070 | AUAUU AU |
| ENSG00000113070 | CACAGUG  |
| ENSG00000113070 | UCACAGG  |
| ENSG00000113070 | UCCCUUG  |
| ENSG00000113070 | UGAAAUG  |
| ENSG00000113070 | UUGACAC  |
| ENSG00000113073 | ACUCCAG  |
| ENSG00000113083 | UCCAGUU  |
| ENSG00000113088 | AAUUUUA  |
| ENSG00000113108 | GAGGUAU  |
| ENSG00000113108 | GGAUUUU  |
| ENSG00000113108 | UAUAAAAG |
| ENSG00000113119 | AAAAAUC  |
| ENSG00000113140 | AACAAAC  |
| ENSG00000113140 | AGCAGCU  |
| ENSG00000113140 | CUCCAC   |
| ENSG00000113140 | CUUGGAG  |
| ENSG00000113140 | GUUAAUG  |
| ENSG00000113140 | UCAUGAU  |
| ENSG00000113140 | UUCUAAU  |
| ENSG00000113140 | UUGGAGG  |
| ENSG00000113161 | ACCAGCA  |
| ENSG00000113161 | UCACAGG  |
| ENSG00000113161 | UCACAGU  |
| ENSG00000113161 | UGCAUUG  |
| ENSG00000113196 | AAAAACC  |
| ENSG00000113196 | AAGUGCA  |
| ENSG00000113196 | GAGGUAU  |
| ENSG00000113211 | ACAUUCA  |
| ENSG00000113231 | UCACAGG  |
| ENSG00000113240 | AAUGUUG  |
| ENSG00000113240 | UACAAAG  |
| ENSG00000113240 | UGACUGU  |
| ENSG00000113262 | GGAAGCC  |
| ENSG00000113263 | AAGUGCA  |
| ENSG00000113263 | UAAUGCU  |
| ENSG00000113263 | UGAAGCU  |
| ENSG00000113273 | CUGACUC  |
| ENSG00000113273 | GCACCAU  |



|                 |         |
|-----------------|---------|
| ENSG00000113273 | GGCUCAG |
| ENSG00000113273 | GUCUGCC |
| ENSG00000113273 | UGAAAUG |
| ENSG00000113273 | UGGAUAA |
| ENSG00000113273 | UGUCUGC |
| ENSG00000113282 | AAAAGUA |
| ENSG00000113282 | UCAUGAU |
| ENSG00000113300 | AAGUGCA |
| ENSG00000113300 | AAGUGCU |
| ENSG00000113300 | AGCACCA |
| ENSG00000113300 | AUGAUGC |
| ENSG00000113300 | CACAGUG |
| ENSG00000113300 | CAGUGCA |
| ENSG00000113300 | CCAGCAU |
| ENSG00000113300 | GGCAGUG |
| ENSG00000113300 | GGCUCAG |
| ENSG00000113300 | UCAUGAU |
| ENSG00000113312 | AGGGAGG |
| ENSG00000113327 | AAAAGUA |
| ENSG00000113327 | ACAAUAU |
| ENSG00000113327 | UUCAAGC |
| ENSG00000113328 | AAAGGUA |
| ENSG00000113328 | CACAGUG |
| ENSG00000113328 | UUGGUUC |
| ENSG00000113356 | AAGUGCU |
| ENSG00000113356 | ACUCAA  |
| ENSG00000113356 | CUUUGGU |
| ENSG00000113356 | GACCUGG |
| ENSG00000113356 | GUAAACA |
| ENSG00000113356 | UUCAAGC |
| ENSG00000113356 | UUGGCAA |
| ENSG00000113356 | UUGGCAC |
| ENSG00000113356 | UUUCAAC |
| ENSG00000113360 | AUUCAUU |
| ENSG00000113360 | CACAGUG |
| ENSG00000113360 | UCACAGU |
| ENSG00000113360 | UCAUUCG |
| ENSG00000113361 | ACUAGAU |
| ENSG00000113361 | ACUGCAG |
| ENSG00000113361 | GGAAGCC |
| ENSG00000113361 | UUCUAAU |
| ENSG00000113368 | GUGCUUG |
| ENSG00000113368 | UGUGCUU |
| ENSG00000113369 | AGCAUUC |
| ENSG00000113369 | AGUGCAA |
| ENSG00000113369 | CUACAGU |
| ENSG00000113369 | CUUCACC |
| ENSG00000113369 | GGCAAGA |
| ENSG00000113369 | UUGGCAA |
| ENSG00000113369 | UUGGCAC |
| ENSG00000113369 | UUUUUGC |
| ENSG00000113384 | CAGCAGA |
| ENSG00000113384 | CUUUGGU |
| ENSG00000113384 | GGAAUGU |
| ENSG00000113384 | UCACAAG |
| ENSG00000113384 | UUCAAGC |
| ENSG00000113387 | AUAAAGU |
| ENSG00000113387 | AUGGCUU |
| ENSG00000113387 | CUUACAG |
| ENSG00000113387 | GAAAACA |
| ENSG00000113387 | UACAAAG |
| ENSG00000113389 | UGAAAGG |
| ENSG00000113389 | UGUCUUU |
| ENSG00000113391 | CACAGUG |

|                 |         |
|-----------------|---------|
| ENSG00000113391 | CAGCAA  |
| ENSG00000113391 | CAUAUUG |
| ENSG00000113391 | GACCCUG |
| ENSG00000113391 | GAUCAGA |
| ENSG00000113391 | UAUUGCU |
| ENSG00000113391 | UCAACAG |
| ENSG00000113391 | UCACAGG |
| ENSG00000113391 | UCACAGU |
| ENSG00000113391 | UGGGUAC |
| ENSG00000113391 | UUGACAC |
| ENSG00000113391 | UUUGCAA |
| ENSG00000113430 | AAGUGCU |
| ENSG00000113430 | AGUGCUG |
| ENSG00000113430 | AGUGUGC |
| ENSG00000113430 | GAGUGUG |
| ENSG00000113430 | GUAAACA |
| ENSG00000113430 | GUGCAA  |
| ENSG00000113441 | AGCACCA |
| ENSG00000113441 | AGUGCAA |
| ENSG00000113441 | CCCUGAG |
| ENSG00000113441 | GGCCUG  |
| ENSG00000113441 | GUGCAA  |
| ENSG00000113441 | UGCAAAG |
| ENSG00000113441 | UUUGCAC |
| ENSG00000113448 | AAAGCUG |
| ENSG00000113448 | AAAGUUU |
| ENSG00000113448 | AACAUUC |
| ENSG00000113448 | AAGGCAC |
| ENSG00000113448 | AAUGCCC |
| ENSG00000113448 | ACACACC |
| ENSG00000113448 | ACACACU |
| ENSG00000113448 | ACAGGUG |
| ENSG00000113448 | ACAUUAC |
| ENSG00000113448 | ACUGUUU |
| ENSG00000113448 | AGGCAGG |
| ENSG00000113448 | AUAUUAU |
| ENSG00000113448 | AUGCAUU |
| ENSG00000113448 | CAGGAAC |
| ENSG00000113448 | CCAGUGC |
| ENSG00000113448 | CUACAGU |
| ENSG00000113448 | CUGCAGC |
| ENSG00000113448 | CUGGGCA |
| ENSG00000113448 | GAAGGUC |
| ENSG00000113448 | GAGAAU  |
| ENSG00000113448 | GAGCGCC |
| ENSG00000113448 | GAUUGUA |
| ENSG00000113448 | GAUUGUC |
| ENSG00000113448 | GCAGCAU |
| ENSG00000113448 | GGCAAGA |
| ENSG00000113448 | GGUUACC |
| ENSG00000113448 | GUAACAG |
| ENSG00000113448 | GUCAGUU |
| ENSG00000113448 | GUGACAG |
| ENSG00000113448 | GUGAGGU |
| ENSG00000113448 | GUGUCAC |
| ENSG00000113448 | UACAGUU |
| ENSG00000113448 | UAUUGCU |
| ENSG00000113448 | UCAUACA |
| ENSG00000113448 | UCAUUCG |
| ENSG00000113448 | UCUCACC |
| ENSG00000113448 | UGCAGCU |
| ENSG00000113448 | UGCAUAG |
| ENSG00000113448 | UGCAUUG |
| ENSG00000113448 | UUGGCAA |

|                 |          |
|-----------------|----------|
| ENSG00000113448 | UUGUUCG  |
| ENSG00000113448 | UUUGCAC  |
| ENSG00000113456 | CACAAUG  |
| ENSG00000113520 | AUAUAAC  |
| ENSG00000113520 | UAUAAAAG |
| ENSG00000113522 | CAGCUGG  |
| ENSG00000113532 | AAAUUUC  |
| ENSG00000113532 | AAGGCAC  |
| ENSG00000113532 | AAGUGCA  |
| ENSG00000113532 | AAUGCCC  |
| ENSG00000113532 | ACUCAA   |
| ENSG00000113532 | AGCCCUU  |
| ENSG00000113532 | CCCUGAG  |
| ENSG00000113532 | CUUGUAU  |
| ENSG00000113532 | CUUUGGU  |
| ENSG00000113532 | GAGAACU  |
| ENSG00000113532 | GAGAUGA  |
| ENSG00000113532 | GAGUUGA  |
| ENSG00000113532 | GAGUUGG  |
| ENSG00000113532 | GCAGCAU  |
| ENSG00000113532 | GCAGGUU  |
| ENSG00000113532 | GUGCAA   |
| ENSG00000113532 | GUGCUUG  |
| ENSG00000113532 | GUGGCC   |
| ENSG00000113532 | UCAAGUA  |
| ENSG00000113532 | UCACACA  |
| ENSG00000113532 | UGAAAUG  |
| ENSG00000113532 | UGCUGAC  |
| ENSG00000113552 | AAUACUG  |
| ENSG00000113552 | CACAGGG  |
| ENSG00000113552 | GGAGUGU  |
| ENSG00000113552 | UAAUAGU  |
| ENSG00000113558 | AAGUGUG  |
| ENSG00000113558 | AAGUUGU  |
| ENSG00000113558 | AAUCCUU  |
| ENSG00000113558 | ACAAUAU  |
| ENSG00000113558 | AGUGCAA  |
| ENSG00000113558 | CAGUGCA  |
| ENSG00000113558 | CUCAAAC  |
| ENSG00000113558 | CUUACAG  |
| ENSG00000113558 | GCAACUU  |
| ENSG00000113558 | GGAAGAC  |
| ENSG00000113558 | GUUAAUG  |
| ENSG00000113558 | UAAUACA  |
| ENSG00000113558 | UACAGUU  |
| ENSG00000113558 | UCAUGAU  |
| ENSG00000113575 | AAAAGUA  |
| ENSG00000113575 | AAAGUAA  |
| ENSG00000113575 | AAAGUGC  |
| ENSG00000113575 | AACUACU  |
| ENSG00000113575 | AAUACUG  |
| ENSG00000113575 | AAUGUUG  |
| ENSG00000113575 | ACUGUAG  |
| ENSG00000113575 | AGCAAAA  |
| ENSG00000113575 | CCCUGAG  |
| ENSG00000113575 | CUCUUC   |
| ENSG00000113575 | CUGUUGA  |
| ENSG00000113575 | GUAUUCU  |
| ENSG00000113575 | UCAUUCG  |
| ENSG00000113578 | AAACUGU  |
| ENSG00000113578 | GAGAUGA  |
| ENSG00000113578 | GCUAGCA  |
| ENSG00000113578 | GGAGUGU  |
| ENSG00000113578 | UCACAGU  |

|                 |         |
|-----------------|---------|
| ENSG00000113578 | UCUGGAG |
| ENSG00000113578 | UGAGGAC |
| ENSG00000113580 | AAAGCUG |
| ENSG00000113580 | AAGGUGC |
| ENSG00000113580 | ACCAAUU |
| ENSG00000113580 | AGCCCUU |
| ENSG00000113580 | AGCUGCC |
| ENSG00000113580 | AUGGCAC |
| ENSG00000113580 | GGCCUG  |
| ENSG00000113580 | GUAAACA |
| ENSG00000113580 | GUAGUGU |
| ENSG00000113580 | UCCCUUG |
| ENSG00000113583 | AGCACCA |
| ENSG00000113583 | CACAGUG |
| ENSG00000113583 | UCACAGU |
| ENSG00000113583 | UGUGCUU |
| ENSG00000113594 | ACAGUAC |
| ENSG00000113594 | ACCAAUU |
| ENSG00000113594 | AGUAACA |
| ENSG00000113594 | AGUAGUU |
| ENSG00000113594 | AGUGGUU |
| ENSG00000113594 | AUAUUUU |
| ENSG00000113594 | CACAGUG |
| ENSG00000113594 | CCCUGAG |
| ENSG00000113594 | CUCCAUU |
| ENSG00000113594 | CUUUGGU |
| ENSG00000113594 | GAGAUGA |
| ENSG00000113594 | GGAAUGU |
| ENSG00000113594 | GGCUCUG |
| ENSG00000113594 | UAGGGCC |
| ENSG00000113594 | UAUUGCU |
| ENSG00000113594 | UCAAGUA |
| ENSG00000113594 | UGAAGUG |
| ENSG00000113594 | UGUGCUU |
| ENSG00000113595 | AUGCACC |
| ENSG00000113595 | CACAGUG |
| ENSG00000113595 | GUAACAG |
| ENSG00000113595 | UCACAGG |
| ENSG00000113597 | AUGCAUU |
| ENSG00000113600 | GGCAUUG |
| ENSG00000113615 | AACACUG |
| ENSG00000113615 | UCACAGU |
| ENSG00000113621 | AAAAACC |
| ENSG00000113621 | CUGGAAA |
| ENSG00000113638 | UCACAAG |
| ENSG00000113645 | GCUGGUG |
| ENSG00000113648 | AAGACAU |
| ENSG00000113648 | AGCACCA |
| ENSG00000113648 | CAGUGCA |
| ENSG00000113649 | GGCUCAG |
| ENSG00000113649 | UUCAAAU |
| ENSG00000113657 | AAAGCUG |
| ENSG00000113657 | ACUCAAA |
| ENSG00000113657 | CACCACC |
| ENSG00000113657 | CCCACCG |
| ENSG00000113657 | CCCACCU |
| ENSG00000113657 | CCUUCUG |
| ENSG00000113657 | CUCCCAC |
| ENSG00000113657 | CUUCUCU |
| ENSG00000113657 | GAGCUGC |
| ENSG00000113657 | GAGGCUG |
| ENSG00000113657 | GAGGUAG |
| ENSG00000113657 | GAGGUAU |
| ENSG00000113657 | UCCCACC |

|                 |         |
|-----------------|---------|
| ENSG00000113657 | UGCUCAC |
| ENSG00000113657 | UGGCUGC |
| ENSG00000113657 | UUGAGGC |
| ENSG00000113658 | AAAGUGC |
| ENSG00000113658 | AAAGUUU |
| ENSG00000113658 | AAGUGCA |
| ENSG00000113658 | ACAGUAU |
| ENSG00000113658 | CACAAUG |
| ENSG00000113658 | CACAGUG |
| ENSG00000113658 | CAGCAA  |
| ENSG00000113658 | CAGGUGA |
| ENSG00000113658 | GAGUGUG |
| ENSG00000113658 | GUGCAA  |
| ENSG00000113658 | UACAAAG |
| ENSG00000113658 | UUCUGCA |
| ENSG00000113712 | AAAAACC |
| ENSG00000113712 | AAAUCCC |
| ENSG00000113712 | AUGCACC |
| ENSG00000113712 | CACAAUG |
| ENSG00000113712 | CAGCUGG |
| ENSG00000113712 | CAGUCCA |
| ENSG00000113712 | CUUACAG |
| ENSG00000113712 | GUUAAUG |
| ENSG00000113712 | GUUCAUG |
| ENSG00000113712 | UACAGUU |
| ENSG00000113712 | UCACAAG |
| ENSG00000113712 | UGUGUCA |
| ENSG00000113712 | UUGGUUC |
| ENSG00000113721 | AAAAAUC |
| ENSG00000113721 | AGCACCA |
| ENSG00000113721 | CAGCUGG |
| ENSG00000113721 | GAGGCAG |
| ENSG00000113721 | GGCAGGG |
| ENSG00000113721 | GUAAACA |
| ENSG00000113721 | UAAUAUC |
| ENSG00000113721 | UCCCUUG |
| ENSG00000113721 | UGUAUAA |
| ENSG00000113722 | CUGGGGG |
| ENSG00000113722 | GAGGCUG |
| ENSG00000113722 | GGAGGAG |
| ENSG00000113734 | CUCUCC  |
| ENSG00000113734 | CUUCUCU |
| ENSG00000113739 | AGAUAAA |
| ENSG00000113739 | AGUGGUU |
| ENSG00000113739 | CAGACAG |
| ENSG00000113739 | CCCCAG  |
| ENSG00000113739 | GGACGGA |
| ENSG00000113739 | GGAGGAG |
| ENSG00000113739 | UACAAAG |
| ENSG00000113739 | UGACAUC |
| ENSG00000113739 | UGGAUAA |
| ENSG00000113739 | UUGGCAC |
| ENSG00000113742 | AAAGAAU |
| ENSG00000113742 | AAAGAGC |
| ENSG00000113742 | AAAGUAC |
| ENSG00000113742 | AACACUG |
| ENSG00000113742 | AAGUCUU |
| ENSG00000113742 | AAGUGCA |
| ENSG00000113742 | AAGUGUG |
| ENSG00000113742 | ACCAGCA |
| ENSG00000113742 | AGCAGCU |
| ENSG00000113742 | AGCAUUC |
| ENSG00000113742 | AGGAUGU |
| ENSG00000113742 | AGUAGAC |

|                 |         |
|-----------------|---------|
| ENSG00000113742 | AGUGCAA |
| ENSG00000113742 | AGUGUGC |
| ENSG00000113742 | AUAAUAC |
| ENSG00000113742 | AUACAAG |
| ENSG00000113742 | AUCCUUG |
| ENSG00000113742 | AUGUGCC |
| ENSG00000113742 | CAAAGCA |
| ENSG00000113742 | CACACCU |
| ENSG00000113742 | CACAGUG |
| ENSG00000113742 | CACCAGC |
| ENSG00000113742 | CACUGUU |
| ENSG00000113742 | CAGCAGA |
| ENSG00000113742 | CAGUGCA |
| ENSG00000113742 | CCAGUGC |
| ENSG00000113742 | CCCGUCC |
| ENSG00000113742 | CCUUCUU |
| ENSG00000113742 | CUCACAC |
| ENSG00000113742 | CUGCAGC |
| ENSG00000113742 | CUGCAGG |
| ENSG00000113742 | CUUACAG |
| ENSG00000113742 | CUUCUCU |
| ENSG00000113742 | GAGGUAG |
| ENSG00000113742 | GUGCAA  |
| ENSG00000113742 | GUGCCUG |
| ENSG00000113742 | UACAAAG |
| ENSG00000113742 | UAUAAAG |
| ENSG00000113742 | UCAAGUA |
| ENSG00000113742 | UCACACA |
| ENSG00000113742 | UCACAGU |
| ENSG00000113742 | UCAUUCG |
| ENSG00000113742 | UGAAAUG |
| ENSG00000113742 | UGCAUAG |
| ENSG00000113742 | UGCAUAU |
| ENSG00000113742 | UGCCUG  |
| ENSG00000113742 | UGUAUAA |
| ENSG00000113742 | UUCUGCA |
| ENSG00000113742 | UUCUUGU |
| ENSG00000113742 | UUGGCAC |
| ENSG00000113758 | AAAAGUA |
| ENSG00000113758 | AAAGCUG |
| ENSG00000113758 | CAAAGUG |
| ENSG00000113758 | CGUGCAU |
| ENSG00000113758 | GCCUGU  |
| ENSG00000113758 | GGACCUG |
| ENSG00000113758 | GGAUUUU |
| ENSG00000113758 | GGCCUG  |
| ENSG00000113758 | GGGUCC  |
| ENSG00000113758 | GUGCAA  |
| ENSG00000113758 | GUGCUG  |
| ENSG00000113758 | UACAAAG |
| ENSG00000113758 | UAUUGCU |
| ENSG00000113758 | UCCACC  |
| ENSG00000113761 | ACCACAG |
| ENSG00000113761 | CCAGGAG |
| ENSG00000113761 | GAGGCAG |
| ENSG00000113761 | GCACCAU |
| ENSG00000113763 | AAAGCUG |
| ENSG00000113763 | AUAUAA  |
| ENSG00000113763 | GAGAUGA |
| ENSG00000113763 | GAGGUAG |
| ENSG00000113763 | GCUGGUG |
| ENSG00000113763 | GUGCCUG |
| ENSG00000113763 | UGCAUAG |
| ENSG00000113763 | UGCAUAU |

|                 |          |
|-----------------|----------|
| ENSG00000113805 | AAGGCAC  |
| ENSG00000113805 | ACACACC  |
| ENSG00000113805 | ACACACU  |
| ENSG00000113805 | AUUCAUU  |
| ENSG00000113805 | CAUGGAU  |
| ENSG00000113805 | UAUAAAAG |
| ENSG00000113805 | UUGGUUC  |
| ENSG00000113812 | AUUCAUU  |
| ENSG00000113838 | UAAUAUC  |
| ENSG00000113851 | UACAAAG  |
| ENSG00000113916 | AAGGCAC  |
| ENSG00000113916 | ACCCUGU  |
| ENSG00000113916 | CUUCACC  |
| ENSG00000113916 | CUUUGGU  |
| ENSG00000113916 | GUAAACA  |
| ENSG00000113916 | UUGGUUC  |
| ENSG00000113971 | AUUGCAC  |
| ENSG00000113971 | UAUAAAAG |
| ENSG00000114013 | AGAUAAA  |
| ENSG00000114013 | GAGGUAG  |
| ENSG00000114013 | GAGUAUU  |
| ENSG00000114019 | AAAAACC  |
| ENSG00000114019 | AACAAAC  |
| ENSG00000114019 | AAUACUG  |
| ENSG00000114019 | ACUGUUU  |
| ENSG00000114019 | AGGAGCU  |
| ENSG00000114019 | AUAUUAU  |
| ENSG00000114019 | CAAUUGC  |
| ENSG00000114019 | CACAAUG  |
| ENSG00000114019 | CAGCAA   |
| ENSG00000114019 | CCAGCAU  |
| ENSG00000114019 | CUGGCUC  |
| ENSG00000114019 | CUUUGGU  |
| ENSG00000114019 | GGAAUGU  |
| ENSG00000114019 | GUCCAGA  |
| ENSG00000114019 | UCACAAG  |
| ENSG00000114019 | UCACAGG  |
| ENSG00000114019 | UCACAGU  |
| ENSG00000114019 | UCCAGUU  |
| ENSG00000114019 | UUGGCAA  |
| ENSG00000114019 | UUGGCAC  |
| ENSG00000114030 | AAAGUAC  |
| ENSG00000114030 | AAAGUUU  |
| ENSG00000114030 | AAGUCUU  |
| ENSG00000114030 | AAGUGCA  |
| ENSG00000114030 | AAGUGCU  |
| ENSG00000114030 | ACAGGUG  |
| ENSG00000114030 | ACAGUAC  |
| ENSG00000114030 | ACUAGAU  |
| ENSG00000114030 | AGAUGUG  |
| ENSG00000114030 | AGCAAAA  |
| ENSG00000114030 | AGCAGCA  |
| ENSG00000114030 | AGCAUUC  |
| ENSG00000114030 | AGCCUGC  |
| ENSG00000114030 | AGUAACA  |
| ENSG00000114030 | AGUACUG  |
| ENSG00000114030 | AGUAGUU  |
| ENSG00000114030 | AGUGCUU  |
| ENSG00000114030 | AUGAUGA  |
| ENSG00000114030 | CAAAGCA  |
| ENSG00000114030 | CAGCAGG  |
| ENSG00000114030 | CAGUGCA  |
| ENSG00000114030 | CCUUCUG  |
| ENSG00000114030 | CUUCUCU  |

|                 |          |
|-----------------|----------|
| ENSG00000114030 | GAAGGUC  |
| ENSG00000114030 | GAGCGCC  |
| ENSG00000114030 | GAGGUAG  |
| ENSG00000114030 | GAGUAU   |
| ENSG00000114030 | GCAGAAG  |
| ENSG00000114030 | GCAGCAU  |
| ENSG00000114030 | GCUACAU  |
| ENSG00000114030 | GGAGUCC  |
| ENSG00000114030 | GGCUGCG  |
| ENSG00000114030 | GGUUGAC  |
| ENSG00000114030 | GGUUUAC  |
| ENSG00000114030 | GUAACAG  |
| ENSG00000114030 | GUGCGCA  |
| ENSG00000114030 | GUGCUUG  |
| ENSG00000114030 | UCACAUU  |
| ENSG00000114030 | UCCAGAG  |
| ENSG00000114030 | UCCCUUG  |
| ENSG00000114030 | UCUCCAA  |
| ENSG00000114030 | UGAGAAU  |
| ENSG00000114030 | UGUCUUU  |
| ENSG00000114030 | UGUGCUU  |
| ENSG00000114030 | UUGGCAA  |
| ENSG00000114062 | AAAAAUC  |
| ENSG00000114062 | AACAUUC  |
| ENSG00000114062 | AAGUGCA  |
| ENSG00000114062 | AAGUGCU  |
| ENSG00000114062 | ACUGUUU  |
| ENSG00000114062 | AGGGAGG  |
| ENSG00000114062 | CACUGUU  |
| ENSG00000114062 | CUACAAA  |
| ENSG00000114062 | CUUUGGU  |
| ENSG00000114062 | GAUUGUC  |
| ENSG00000114062 | GGAGGCA  |
| ENSG00000114062 | GUUCAUG  |
| ENSG00000114062 | UCAAGUA  |
| ENSG00000114062 | UGUGCUU  |
| ENSG00000114062 | UUGUUCG  |
| ENSG00000114098 | AAAAACC  |
| ENSG00000114098 | AAAAGUA  |
| ENSG00000114098 | ACAAUUAU |
| ENSG00000114098 | AGUGCUG  |
| ENSG00000114098 | AGUGCUU  |
| ENSG00000114098 | AUUCAUU  |
| ENSG00000114098 | CACCACC  |
| ENSG00000114098 | CCAGCAU  |
| ENSG00000114098 | CUACAGU  |
| ENSG00000114098 | CUUCACC  |
| ENSG00000114098 | GUGCAAA  |
| ENSG00000114098 | UCACAGG  |
| ENSG00000114098 | UCACCAC  |
| ENSG00000114098 | UCAUUCG  |
| ENSG00000114107 | AAUCCUU  |
| ENSG00000114107 | UGAAAGG  |
| ENSG00000114120 | AAAGUGC  |
| ENSG00000114120 | AUGGCAC  |
| ENSG00000114120 | AUUGCAC  |
| ENSG00000114120 | CAAAGUG  |
| ENSG00000114120 | UCCAGUU  |
| ENSG00000114120 | UGUGCUU  |
| ENSG00000114120 | UUGGUCC  |
| ENSG00000114125 | AAUUUUA  |
| ENSG00000114125 | GAGGUAG  |
| ENSG00000114127 | AAAGUAU  |
| ENSG00000114127 | AAAGUUU  |



|                 |         |
|-----------------|---------|
| ENSG00000114127 | AAGGCAC |
| ENSG00000114127 | AGCAAAA |
| ENSG00000114127 | AGCACCA |
| ENSG00000114127 | AUUGCAC |
| ENSG00000114127 | CAAAACU |
| ENSG00000114127 | CCUUCAU |
| ENSG00000114127 | CUUUGGU |
| ENSG00000114127 | GCUGGUG |
| ENSG00000114127 | UCCCUUG |
| ENSG00000114127 | UGCAAAG |
| ENSG00000114127 | UGGUACC |
| ENSG00000114127 | UGUAUAA |
| ENSG00000114127 | UUUCAAC |
| ENSG00000114127 | UUUGCAC |
| ENSG00000114166 | UAUUGCU |
| ENSG00000114166 | UUUGCAA |
| ENSG00000114209 | AAAGAAU |
| ENSG00000114209 | AAGGCGC |
| ENSG00000114209 | GUAAACA |
| ENSG00000114209 | UACAAAG |
| ENSG00000114209 | UAUAAUA |
| ENSG00000114209 | UCAAGUA |
| ENSG00000114209 | UGCAGCU |
| ENSG00000114209 | UUCAAGC |
| ENSG00000114251 | AAAGAAU |
| ENSG00000114251 | AACACUG |
| ENSG00000114251 | AAUGCCC |
| ENSG00000114251 | AAUUUUA |
| ENSG00000114251 | AGAUAAA |
| ENSG00000114251 | AGAUGUG |
| ENSG00000114251 | AGGUUAU |
| ENSG00000114251 | AGUGCUG |
| ENSG00000114251 | AGUGCUU |
| ENSG00000114251 | AUAAUAC |
| ENSG00000114251 | AUGCAUU |
| ENSG00000114251 | CAGCAAA |
| ENSG00000114251 | UAAUAUC |
| ENSG00000114251 | UCAAGUA |
| ENSG00000114251 | UGAAGCU |
| ENSG00000114251 | UGUAUAA |
| ENSG00000114251 | UUUGCAC |
| ENSG00000114268 | AAAGAAU |
| ENSG00000114268 | AUUGCAC |
| ENSG00000114268 | CAGCAGG |
| ENSG00000114268 | GGUGGGC |
| ENSG00000114268 | UAUUGCU |
| ENSG00000114268 | UCACAUU |
| ENSG00000114270 | AAUGCCC |
| ENSG00000114270 | AGCAGCU |
| ENSG00000114270 | CACAAUG |
| ENSG00000114270 | CUCUAGC |
| ENSG00000114270 | GCACCAU |
| ENSG00000114279 | CAGUAGA |
| ENSG00000114279 | CUUUGGU |
| ENSG00000114279 | GGAUUUC |
| ENSG00000114279 | GGAUUUU |
| ENSG00000114302 | AAUGCCC |
| ENSG00000114302 | UGGACUG |
| ENSG00000114302 | UGGAGAU |
| ENSG00000114315 | AAGGCGC |
| ENSG00000114315 | AGUGCAA |
| ENSG00000114315 | CUUUGGU |
| ENSG00000114315 | UACAAAG |
| ENSG00000114315 | UUGGCAA |

|                 |         |
|-----------------|---------|
| ENSG00000114315 | UUGGCAC |
| ENSG00000114316 | UCACCAC |
| ENSG00000114346 | AAGUCAC |
| ENSG00000114346 | AAGUGCU |
| ENSG00000114349 | AGGGAGG |
| ENSG00000114349 | CAGGUGA |
| ENSG00000114349 | GUCAACA |
| ENSG00000114349 | UAUUGCU |
| ENSG00000114349 | UGGCCAC |
| ENSG00000114353 | AAAGUUU |
| ENSG00000114353 | AAGGCAC |
| ENSG00000114353 | ACACACU |
| ENSG00000114353 | AGCCCUU |
| ENSG00000114353 | AGGUUAU |
| ENSG00000114353 | CAGCAGG |
| ENSG00000114353 | CAGGUGA |
| ENSG00000114353 | CCCUGUC |
| ENSG00000114353 | CCCUGUU |
| ENSG00000114353 | CUGCCCC |
| ENSG00000114353 | CUGGAAA |
| ENSG00000114353 | GAGGGGC |
| ENSG00000114353 | GCCUGGG |
| ENSG00000114353 | GCUACAU |
| ENSG00000114353 | GCUGGUG |
| ENSG00000114353 | GGCACGG |
| ENSG00000114353 | GGCAGCG |
| ENSG00000114353 | GGCAGGG |
| ENSG00000114353 | GGCAGUG |
| ENSG00000114353 | GUGGCC  |
| ENSG00000114353 | UCAACGG |
| ENSG00000114353 | UCAUUUG |
| ENSG00000114353 | UCCUGU  |
| ENSG00000114353 | UCUGGAA |
| ENSG00000114353 | UGUCUGC |
| ENSG00000114353 | UGUGCUU |
| ENSG00000114353 | UUCAAAU |
| ENSG00000114353 | UUCUAG  |
| ENSG00000114353 | UUCUUGU |
| ENSG00000114354 | GUAGUGU |
| ENSG00000114374 | ACAUUCA |
| ENSG00000114374 | AGCCAGU |
| ENSG00000114374 | GUGAAUG |
| ENSG00000114374 | UACAAAG |
| ENSG00000114374 | UGGACUG |
| ENSG00000114374 | UUGGUUC |
| ENSG00000114374 | UUGUGAC |
| ENSG00000114383 | AACGGCU |
| ENSG00000114383 | AAGUGCU |
| ENSG00000114383 | AGCAAAA |
| ENSG00000114383 | CACCAGC |
| ENSG00000114383 | GAGGUAG |
| ENSG00000114383 | GUGGCC  |
| ENSG00000114383 | UACAAAG |
| ENSG00000114383 | UGAAAUG |
| ENSG00000114395 | GAGGCAG |
| ENSG00000114416 | AAAAAUC |
| ENSG00000114416 | AAAGCUG |
| ENSG00000114416 | AAAGUGC |
| ENSG00000114416 | AAAGUUU |
| ENSG00000114416 | AACAAAC |
| ENSG00000114416 | AACAGUC |
| ENSG00000114416 | ACUGCAU |
| ENSG00000114416 | ACUGUAG |
| ENSG00000114416 | AGCAGCU |

|                 |          |
|-----------------|----------|
| ENSG00000114416 | AGCCAGU  |
| ENSG00000114416 | AGUAGUU  |
| ENSG00000114416 | AGUGGUU  |
| ENSG00000114416 | AUGUAAU  |
| ENSG00000114416 | CAGUAGA  |
| ENSG00000114416 | CAUAUUG  |
| ENSG00000114416 | CCAGUGC  |
| ENSG00000114416 | CCAGUGU  |
| ENSG00000114416 | CUGCAGC  |
| ENSG00000114416 | CUGCAGG  |
| ENSG00000114416 | CUUUGGU  |
| ENSG00000114416 | GGAAGAC  |
| ENSG00000114416 | GGAGGAG  |
| ENSG00000114416 | GGCAAGA  |
| ENSG00000114416 | GUAAACA  |
| ENSG00000114416 | GUAACAG  |
| ENSG00000114416 | GUGCAAA  |
| ENSG00000114416 | UAAUGCU  |
| ENSG00000114416 | UCCAGUU  |
| ENSG00000114416 | UCUGGAG  |
| ENSG00000114416 | UGCAUAG  |
| ENSG00000114416 | UUCCUAG  |
| ENSG00000114416 | UUCUCG   |
| ENSG00000114416 | UUGGCAC  |
| ENSG00000114423 | AAUUAUU  |
| ENSG00000114423 | GCUAGCA  |
| ENSG00000114423 | UCACAGU  |
| ENSG00000114439 | CACAAUG  |
| ENSG00000114450 | AACACUG  |
| ENSG00000114450 | AGCACCA  |
| ENSG00000114450 | AUGCCUU  |
| ENSG00000114450 | CAAAACU  |
| ENSG00000114450 | CUCCAGC  |
| ENSG00000114450 | GAAAACA  |
| ENSG00000114450 | GCACCAU  |
| ENSG00000114450 | UCACAGG  |
| ENSG00000114450 | UCACAGU  |
| ENSG00000114450 | UUGGUCC  |
| ENSG00000114455 | AAUCCUU  |
| ENSG00000114503 | UUUGCAC  |
| ENSG00000114520 | AAGGCAC  |
| ENSG00000114520 | ACCCUGU  |
| ENSG00000114520 | AGCACCA  |
| ENSG00000114520 | GCUAGCA  |
| ENSG00000114520 | GUGCUUG  |
| ENSG00000114520 | UCACAGG  |
| ENSG00000114529 | GAGGUAG  |
| ENSG00000114541 | AAAGAAU  |
| ENSG00000114541 | ACAAUUAU |
| ENSG00000114541 | CUAUACA  |
| ENSG00000114541 | GAAUUGU  |
| ENSG00000114554 | AAAAAUC  |
| ENSG00000114554 | AAAGUGC  |
| ENSG00000114554 | AAGUGCU  |
| ENSG00000114554 | AAUCUCA  |
| ENSG00000114554 | ACAGUAC  |
| ENSG00000114554 | AGCAAAA  |
| ENSG00000114554 | AGUGCUU  |
| ENSG00000114554 | CAGUUAAC |
| ENSG00000114554 | CCCUGAG  |
| ENSG00000114554 | CUAGUAA  |
| ENSG00000114554 | CUAGUAG  |
| ENSG00000114554 | CUCUGGG  |
| ENSG00000114554 | GAGGUAAU |

|                 |         |
|-----------------|---------|
| ENSG00000114554 | GCUAGCA |
| ENSG00000114554 | GGAAGAC |
| ENSG00000114554 | GGAAGCC |
| ENSG00000114554 | GUAAACA |
| ENSG00000114554 | GUGCUUG |
| ENSG00000114554 | UCAACAG |
| ENSG00000114554 | UCCCACA |
| ENSG00000114554 | UCCCACC |
| ENSG00000114554 | UGAGGAC |
| ENSG00000114573 | AAAGCUG |
| ENSG00000114573 | AAAUCCC |
| ENSG00000114573 | AACACUG |
| ENSG00000114573 | AAUCUCA |
| ENSG00000114573 | ACAGUAC |
| ENSG00000114573 | ACAGUAU |
| ENSG00000114573 | ACUGCAU |
| ENSG00000114573 | AGCACCA |
| ENSG00000114573 | AUUCAUU |
| ENSG00000114573 | CACAGUG |
| ENSG00000114573 | CACCACC |
| ENSG00000114573 | CUCAAAC |
| ENSG00000114573 | CUGGAAA |
| ENSG00000114573 | GGAAGCC |
| ENSG00000114573 | GGAGGCA |
| ENSG00000114573 | UACAGUU |
| ENSG00000114573 | UCAUACA |
| ENSG00000114626 | CCCUGAG |
| ENSG00000114638 | AGCACCA |
| ENSG00000114638 | CCAGCAU |
| ENSG00000114646 | AAAGUAC |
| ENSG00000114648 | AAGUGCU |
| ENSG00000114648 | ACCUGGA |
| ENSG00000114648 | ACUGCAG |
| ENSG00000114648 | ACUGGAU |
| ENSG00000114648 | AGGCAGG |
| ENSG00000114648 | AGUGCUU |
| ENSG00000114648 | AUUGCAC |
| ENSG00000114648 | CACAGUG |
| ENSG00000114648 | CAGUGCA |
| ENSG00000114648 | CCAGUGC |
| ENSG00000114648 | CUGCAGC |
| ENSG00000114648 | CUGCUCA |
| ENSG00000114648 | CUGGAAA |
| ENSG00000114648 | GCAGCAU |
| ENSG00000114648 | GCUGGUG |
| ENSG00000114648 | GGAGGAG |
| ENSG00000114648 | GGCAGCG |
| ENSG00000114648 | GUCUGCC |
| ENSG00000114648 | UAGAGGA |
| ENSG00000114648 | UUGGCAA |
| ENSG00000114648 | UUGGCAC |
| ENSG00000114648 | UUGGUUC |
| ENSG00000114654 | GAGGCUG |
| ENSG00000114656 | UCCUGAG |
| ENSG00000114686 | AAUUUUA |
| ENSG00000114698 | GGCCUG  |
| ENSG00000114698 | GUGGCC  |
| ENSG00000114735 | CAGGUGA |
| ENSG00000114735 | GGGAGC  |
| ENSG00000114735 | GUCACUC |
| ENSG00000114737 | AAAAAUC |
| ENSG00000114737 | CAGCUGG |
| ENSG00000114737 | GGAAGAC |
| ENSG00000114737 | GGCUCUG |

|                 |          |
|-----------------|----------|
| ENSG00000114738 | ACUCAGG  |
| ENSG00000114738 | UCACAGU  |
| ENSG00000114739 | AAAGCUG  |
| ENSG00000114739 | AAAGUAC  |
| ENSG00000114739 | AACAAAC  |
| ENSG00000114739 | AACGCCU  |
| ENSG00000114739 | AACUCUA  |
| ENSG00000114739 | AAGACAU  |
| ENSG00000114739 | AAGGCAC  |
| ENSG00000114739 | AAUACUG  |
| ENSG00000114739 | AAUGCCC  |
| ENSG00000114739 | AAUGUUG  |
| ENSG00000114739 | ACAAGGU  |
| ENSG00000114739 | ACAUUAC  |
| ENSG00000114739 | AGCAAAA  |
| ENSG00000114739 | AGCAGCG  |
| ENSG00000114739 | AGGUUUAU |
| ENSG00000114739 | AGUACUG  |
| ENSG00000114739 | AUGGCGC  |
| ENSG00000114739 | AUGUAAU  |
| ENSG00000114739 | AUGUCUG  |
| ENSG00000114739 | CACAGGG  |
| ENSG00000114739 | CACUGUU  |
| ENSG00000114739 | CAGACAG  |
| ENSG00000114739 | CAGUCCA  |
| ENSG00000114739 | CAGUGCA  |
| ENSG00000114739 | CCCCCAG  |
| ENSG00000114739 | CCUGCUG  |
| ENSG00000114739 | CUCACAC  |
| ENSG00000114739 | CUUACAG  |
| ENSG00000114739 | CUUCACC  |
| ENSG00000114739 | GAGAAAU  |
| ENSG00000114739 | GAGGUAG  |
| ENSG00000114739 | GAGGUUAU |
| ENSG00000114739 | GAGUCUU  |
| ENSG00000114739 | GCAACUU  |
| ENSG00000114739 | GCAGAAG  |
| ENSG00000114739 | GCAUCCC  |
| ENSG00000114739 | GGAAGCC  |
| ENSG00000114739 | GGAAUGU  |
| ENSG00000114739 | GGGGUGC  |
| ENSG00000114739 | GGGGUGG  |
| ENSG00000114739 | GUUAAUG  |
| ENSG00000114739 | UAAGACU  |
| ENSG00000114739 | UAAUGCU  |
| ENSG00000114739 | UAGGCCG  |
| ENSG00000114739 | UCAAGUA  |
| ENSG00000114739 | UCACACA  |
| ENSG00000114739 | UCACAGG  |
| ENSG00000114739 | UCACAGU  |
| ENSG00000114739 | UCAUUUG  |
| ENSG00000114739 | UCUAGAG  |
| ENSG00000114739 | UGAAAGG  |
| ENSG00000114739 | UGAAAUG  |
| ENSG00000114739 | UGAGAAG  |
| ENSG00000114739 | UGAGUCU  |
| ENSG00000114739 | UGAUCCA  |
| ENSG00000114739 | UGCAGCU  |
| ENSG00000114739 | UGCUGAC  |
| ENSG00000114739 | UGUCUGC  |
| ENSG00000114739 | UGUUGAA  |
| ENSG00000114739 | UUAGAGA  |
| ENSG00000114739 | UUCCUAG  |
| ENSG00000114739 | UUCCUCG  |

|                 |          |
|-----------------|----------|
| ENSG00000114739 | UUCUAAU  |
| ENSG00000114739 | UUCUGCA  |
| ENSG00000114739 | UUGAGGC  |
| ENSG00000114739 | UUGGCAC  |
| ENSG00000114739 | UUUGCAC  |
| ENSG00000114742 | AAGGCAC  |
| ENSG00000114742 | AUAUUAU  |
| ENSG00000114742 | GCUUCCU  |
| ENSG00000114742 | GUGCUUG  |
| ENSG00000114742 | UGCAUUAU |
| ENSG00000114742 | UGUGCUU  |
| ENSG00000114744 | AUUCAUU  |
| ENSG00000114744 | UCAUUUG  |
| ENSG00000114745 | CACAGUG  |
| ENSG00000114745 | CCAGUAC  |
| ENSG00000114745 | UCACAGG  |
| ENSG00000114745 | UGUAUAA  |
| ENSG00000114757 | AAGUGCA  |
| ENSG00000114757 | AGCAAAA  |
| ENSG00000114757 | AUGCACC  |
| ENSG00000114757 | GUGCAAA  |
| ENSG00000114757 | GUGCUUG  |
| ENSG00000114757 | UGCAUUAU |
| ENSG00000114757 | UUGGUCC  |
| ENSG00000114770 | AAACUGU  |
| ENSG00000114770 | AAAGCUG  |
| ENSG00000114770 | ACAAUAU  |
| ENSG00000114770 | ACAGUAU  |
| ENSG00000114770 | AUAAAAGU |
| ENSG00000114770 | CACAGUG  |
| ENSG00000114770 | CCAGUGU  |
| ENSG00000114770 | CCCACCU  |
| ENSG00000114770 | CCCUGAG  |
| ENSG00000114770 | GAGCUGC  |
| ENSG00000114770 | GAGGCAG  |
| ENSG00000114770 | GAGGUAG  |
| ENSG00000114770 | GAGGUAU  |
| ENSG00000114770 | GGCAGGG  |
| ENSG00000114770 | UAAUAUC  |
| ENSG00000114770 | UACAGUU  |
| ENSG00000114770 | UAUAAAAG |
| ENSG00000114779 | AGGCAGG  |
| ENSG00000114784 | UCCCAUA  |
| ENSG00000114796 | CACUCCU  |
| ENSG00000114796 | CCUGAG   |
| ENSG00000114796 | CUGGCUC  |
| ENSG00000114796 | CUUUGGU  |
| ENSG00000114796 | GAGGUAG  |
| ENSG00000114796 | GAGGUAU  |
| ENSG00000114796 | GAGUAUU  |
| ENSG00000114796 | GCUACAU  |
| ENSG00000114796 | GGCUCAG  |
| ENSG00000114796 | GUGAGGU  |
| ENSG00000114796 | UCCUGAG  |
| ENSG00000114796 | UCUGGAA  |
| ENSG00000114805 | GUAACAG  |
| ENSG00000114805 | UUCUUGU  |
| ENSG00000114805 | UUGGCAA  |
| ENSG00000114850 | AAGUUGU  |
| ENSG00000114850 | ACCACAG  |
| ENSG00000114850 | ACUGUGU  |
| ENSG00000114850 | GAGAACC  |
| ENSG00000114850 | GGCAGGG  |
| ENSG00000114850 | GGCUGCG  |

|                 |          |
|-----------------|----------|
| ENSG00000114850 | UCAACAG  |
| ENSG00000114850 | UGGCUGC  |
| ENSG00000114853 | AAAGUGC  |
| ENSG00000114853 | AACAAAC  |
| ENSG00000114853 | AAGGUGC  |
| ENSG00000114853 | AAGUGCU  |
| ENSG00000114853 | ACCUGGA  |
| ENSG00000114853 | AGCACCA  |
| ENSG00000114853 | AGCUUUAU |
| ENSG00000114853 | AGGCAGG  |
| ENSG00000114853 | AGUGCUU  |
| ENSG00000114853 | AUAAAGU  |
| ENSG00000114853 | CCUGAG   |
| ENSG00000114853 | CUCUUC   |
| ENSG00000114853 | CUGCCCC  |
| ENSG00000114853 | GACAACU  |
| ENSG00000114853 | GCCUGGA  |
| ENSG00000114853 | GCUGGUG  |
| ENSG00000114853 | GGAAGCC  |
| ENSG00000114853 | GGGUCC   |
| ENSG00000114853 | GUGCAA   |
| ENSG00000114853 | UAUUGCU  |
| ENSG00000114853 | UGAGGAC  |
| ENSG00000114853 | UGCAAAG  |
| ENSG00000114853 | UGUCUGG  |
| ENSG00000114857 | AAGGUGC  |
| ENSG00000114857 | ACUGUAG  |
| ENSG00000114857 | AGCACCA  |
| ENSG00000114857 | AUACAAG  |
| ENSG00000114857 | CAAAGCA  |
| ENSG00000114857 | CACAGUG  |
| ENSG00000114857 | CUACAAA  |
| ENSG00000114857 | GCAGCAU  |
| ENSG00000114857 | GUAAACA  |
| ENSG00000114857 | UCUUGAG  |
| ENSG00000114857 | UUCAAGC  |
| ENSG00000114857 | UUCUAAU  |
| ENSG00000114857 | UUCUUGU  |
| ENSG00000114861 | AAAUCCC  |
| ENSG00000114861 | AAAUGGU  |
| ENSG00000114861 | AAGACAU  |
| ENSG00000114861 | AAGUGCA  |
| ENSG00000114861 | AAGUGCU  |
| ENSG00000114861 | AAUACUG  |
| ENSG00000114861 | ACAGUAC  |
| ENSG00000114861 | ACAGUAU  |
| ENSG00000114861 | ACAUUAC  |
| ENSG00000114861 | ACCAGCA  |
| ENSG00000114861 | ACUGUGU  |
| ENSG00000114861 | AGAUAAA  |
| ENSG00000114861 | AGCUGCC  |
| ENSG00000114861 | AGUACUG  |
| ENSG00000114861 | AGUGCAA  |
| ENSG00000114861 | AUAAAGU  |
| ENSG00000114861 | AUAAUAC  |
| ENSG00000114861 | AUCACUA  |
| ENSG00000114861 | AUGGCAC  |
| ENSG00000114861 | AUUCAUU  |
| ENSG00000114861 | CUACAAA  |
| ENSG00000114861 | CUACAGU  |
| ENSG00000114861 | CUCCAA   |
| ENSG00000114861 | CUCCAC   |
| ENSG00000114861 | GAGGAUA  |
| ENSG00000114861 | GAGGUAG  |

|                 |         |
|-----------------|---------|
| ENSG00000114861 | GAGGUAU |
| ENSG00000114861 | GCAACUU |
| ENSG00000114861 | UACAAAG |
| ENSG00000114861 | UAUAAAG |
| ENSG00000114861 | UCAACAG |
| ENSG00000114861 | UCACACA |
| ENSG00000114861 | UCAUUCG |
| ENSG00000114861 | UGAAAUG |
| ENSG00000114861 | UGGGAUC |
| ENSG00000114861 | UUGAUCA |
| ENSG00000114861 | UUGGUCC |
| ENSG00000114867 | AAAUUUC |
| ENSG00000114867 | CCCCCAG |
| ENSG00000114904 | CUGGACU |
| ENSG00000114904 | GGCAGCG |
| ENSG00000114904 | GUAAACA |
| ENSG00000114923 | CAAAGCA |
| ENSG00000114923 | GAGGCAG |
| ENSG00000114948 | AUUGCAC |
| ENSG00000114982 | CUCCCAA |
| ENSG00000114982 | GCAGGAC |
| ENSG00000114999 | AGCAGCA |
| ENSG00000114999 | AGGUAGU |
| ENSG00000114999 | CCCCCAG |
| ENSG00000114999 | GAGAACC |
| ENSG00000114999 | GAGCUAA |
| ENSG00000114999 | GAGGUAG |
| ENSG00000114999 | GAGGUAU |
| ENSG00000114999 | GGGGCAG |
| ENSG00000114999 | UCUCAAG |
| ENSG00000115008 | AUUCAUU |
| ENSG00000115008 | CUUACAG |
| ENSG00000115008 | GAGUCUU |
| ENSG00000115008 | UCAUUUG |
| ENSG00000115008 | UCUUGAG |
| ENSG00000115009 | AUGAUGA |
| ENSG00000115041 | CCUGAG  |
| ENSG00000115041 | CCUUCUG |
| ENSG00000115041 | GAGAACC |
| ENSG00000115041 | GAGAACU |
| ENSG00000115041 | GAGACGC |
| ENSG00000115041 | GAGCUGC |
| ENSG00000115041 | GUGCUUG |
| ENSG00000115053 | AACAUUC |
| ENSG00000115073 | UACAAAG |
| ENSG00000115073 | UAUUACC |
| ENSG00000115084 | AGGCAGG |
| ENSG00000115084 | CUCUCC  |
| ENSG00000115084 | GAUUGUC |
| ENSG00000115084 | GCAGGUU |
| ENSG00000115084 | GUCUCUG |
| ENSG00000115084 | UCGCUGC |
| ENSG00000115084 | UUAGAGA |
| ENSG00000115107 | AAGGCAC |
| ENSG00000115107 | GAGAAGA |
| ENSG00000115107 | GAGGUAG |
| ENSG00000115107 | GAGGUAU |
| ENSG00000115107 | GGCAUUG |
| ENSG00000115107 | GGGGCAG |
| ENSG00000115107 | GUGAGGU |
| ENSG00000115107 | UGAGAAG |
| ENSG00000115109 | AAAGUGC |
| ENSG00000115109 | AAUUUUA |
| ENSG00000115109 | UAAUACA |



|                 |         |
|-----------------|---------|
| ENSG00000115109 | UCCUGAG |
| ENSG00000115112 | AAAGCUG |
| ENSG00000115112 | AGCAGCU |
| ENSG00000115112 | CUUCUCU |
| ENSG00000115112 | GAGAAGA |
| ENSG00000115112 | GAGGCAG |
| ENSG00000115112 | GUCCAGA |
| ENSG00000115112 | UCUCCAA |
| ENSG00000115112 | UGAGAAG |
| ENSG00000115145 | AGCAGCU |
| ENSG00000115145 | GUGCUUG |
| ENSG00000115159 | AGUAACA |
| ENSG00000115159 | CACAGUG |
| ENSG00000115159 | CAGUCCA |
| ENSG00000115159 | CAGUUAC |
| ENSG00000115159 | CUCAAAC |
| ENSG00000115159 | UAUAAAG |
| ENSG00000115159 | UCCCUCU |
| ENSG00000115159 | UCUGGAA |
| ENSG00000115159 | UGCAGCU |
| ENSG00000115170 | AAAAAUC |
| ENSG00000115170 | AAAAGUA |
| ENSG00000115170 | AACAGUC |
| ENSG00000115170 | AAUGUUG |
| ENSG00000115170 | AGUAACA |
| ENSG00000115170 | AUACAAG |
| ENSG00000115170 | CAGUGCA |
| ENSG00000115170 | GUAACAG |
| ENSG00000115170 | UAUUGCU |
| ENSG00000115170 | UGCUGAC |
| ENSG00000115170 | UUCCUAG |
| ENSG00000115170 | UUGGCAA |
| ENSG00000115170 | UUGGCAC |
| ENSG00000115183 | ACAGUAC |
| ENSG00000115183 | ACAGUAU |
| ENSG00000115183 | ACCAGCA |
| ENSG00000115183 | AGAUAAA |
| ENSG00000115183 | AGCACCA |
| ENSG00000115183 | AGUGCAA |
| ENSG00000115183 | CAGUAGU |
| ENSG00000115183 | CCAGCAU |
| ENSG00000115183 | UAAGACU |
| ENSG00000115183 | UCCCAUA |
| ENSG00000115194 | CUUUGGU |
| ENSG00000115194 | GAGGCUG |
| ENSG00000115194 | GGCAGUG |
| ENSG00000115194 | GGGCCCC |
| ENSG00000115194 | UGCAUAG |
| ENSG00000115207 | AUGAGCU |
| ENSG00000115207 | CCAGUAC |
| ENSG00000115207 | CCUUCAU |
| ENSG00000115207 | CUCCCAA |
| ENSG00000115207 | UAUAAAG |
| ENSG00000115207 | UCAAGUA |
| ENSG00000115216 | AAUACUG |
| ENSG00000115226 | AAGAACC |
| ENSG00000115226 | AAGACAU |
| ENSG00000115226 | AGUGCAA |
| ENSG00000115226 | CACAGUG |
| ENSG00000115226 | CAGGUGA |
| ENSG00000115226 | UCACAGU |
| ENSG00000115232 | AAGUGCA |
| ENSG00000115232 | AGUGCAA |
| ENSG00000115232 | CCAGUGU |

|                 |          |
|-----------------|----------|
| ENSG00000115232 | CUUGUAU  |
| ENSG00000115232 | UAGUGAG  |
| ENSG00000115232 | UGAGUCU  |
| ENSG00000115234 | CACAGGG  |
| ENSG00000115234 | UUGGCAA  |
| ENSG00000115234 | UUGGCAC  |
| ENSG00000115252 | CUGGCUC  |
| ENSG00000115252 | UCCCUCU  |
| ENSG00000115255 | CAGGUGA  |
| ENSG00000115266 | GAGGUAG  |
| ENSG00000115266 | GAUUGUC  |
| ENSG00000115282 | CAA AUGC |
| ENSG00000115282 | UCUUGAG  |
| ENSG00000115295 | AAGUGCA  |
| ENSG00000115295 | AGUGCUU  |
| ENSG00000115295 | AUAAUAC  |
| ENSG00000115295 | AUUGCAC  |
| ENSG00000115295 | CAGGAAC  |
| ENSG00000115306 | AAAGGUA  |
| ENSG00000115306 | AAAGUGC  |
| ENSG00000115306 | AACAUUC  |
| ENSG00000115306 | ACAGGUG  |
| ENSG00000115306 | ACAGUAU  |
| ENSG00000115306 | ACAUUAC  |
| ENSG00000115306 | ACUAGAU  |
| ENSG00000115306 | ACUUGGA  |
| ENSG00000115306 | AGAUAAA  |
| ENSG00000115306 | AGCAAAA  |
| ENSG00000115306 | AGCACCA  |
| ENSG00000115306 | AGUAACA  |
| ENSG00000115306 | AUAAAGU  |
| ENSG00000115306 | AUAU AAC |
| ENSG00000115306 | CACAGUG  |
| ENSG00000115306 | CCAGUAC  |
| ENSG00000115306 | CCUUCUG  |
| ENSG00000115306 | CUGCAGC  |
| ENSG00000115306 | CUUGGAG  |
| ENSG00000115306 | GAGAAAU  |
| ENSG00000115306 | GAGCUGC  |
| ENSG00000115306 | GAUUGUA  |
| ENSG00000115306 | GAUUGUC  |
| ENSG00000115306 | GCAGAAG  |
| ENSG00000115306 | GCAGCAU  |
| ENSG00000115306 | GCUGGAU  |
| ENSG00000115306 | GGCUGCG  |
| ENSG00000115306 | GGGUUUA  |
| ENSG00000115306 | GUCCAGA  |
| ENSG00000115306 | GUGACAG  |
| ENSG00000115306 | GUGUGGC  |
| ENSG00000115306 | UACAGUU  |
| ENSG00000115306 | UCAUUCG  |
| ENSG00000115306 | UCCCUCU  |
| ENSG00000115306 | UCCUAUA  |
| ENSG00000115306 | UCUGGAG  |
| ENSG00000115306 | UGCAUAG  |
| ENSG00000115306 | UGCAUAU  |
| ENSG00000115306 | UGGCUGC  |
| ENSG00000115306 | UUGGUCC  |
| ENSG00000115306 | UUGGUUC  |
| ENSG00000115307 | CUCUGGG  |
| ENSG00000115307 | CUGCCC   |
| ENSG00000115307 | GAAAACA  |
| ENSG00000115307 | GGCUCUG  |
| ENSG00000115307 | GGGGAGC  |

|                 |          |
|-----------------|----------|
| ENSG00000115310 | AUGCAUU  |
| ENSG00000115317 | AGGAGCU  |
| ENSG00000115317 | AUAU AAC |
| ENSG00000115317 | CCAUUAC  |
| ENSG00000115317 | CUCUAGC  |
| ENSG00000115317 | GAGGCUG  |
| ENSG00000115317 | GCUGGUG  |
| ENSG00000115317 | GGACCUG  |
| ENSG00000115317 | GGUGGUU  |
| ENSG00000115317 | UAGGU AU |
| ENSG00000115318 | AUACCUC  |
| ENSG00000115318 | AUAU AAC |
| ENSG00000115318 | GAGGUAG  |
| ENSG00000115318 | GAGGU AU |
| ENSG00000115318 | GGCAGCG  |
| ENSG00000115318 | GGUGGUC  |
| ENSG00000115318 | GGUGGUU  |
| ENSG00000115318 | UCCUGAG  |
| ENSG00000115350 | AAAGCUG  |
| ENSG00000115350 | UUGAUCA  |
| ENSG00000115355 | AAAGUAC  |
| ENSG00000115355 | AACCUGU  |
| ENSG00000115355 | AAGGCAC  |
| ENSG00000115355 | AAGGUGC  |
| ENSG00000115355 | AGCACCA  |
| ENSG00000115355 | AGGACAC  |
| ENSG00000115355 | CAA AUGC |
| ENSG00000115355 | CACAGUG  |
| ENSG00000115355 | CCAGUAC  |
| ENSG00000115355 | GAGAAAU  |
| ENSG00000115355 | GUAGUGU  |
| ENSG00000115355 | GUCUUGC  |
| ENSG00000115355 | GUGAGGU  |
| ENSG00000115355 | GUGCAA A |
| ENSG00000115355 | GUGCUUG  |
| ENSG00000115355 | UGAAAGG  |
| ENSG00000115355 | UGGCCCU  |
| ENSG00000115355 | UGUGCUU  |
| ENSG00000115355 | UUAGGAU  |
| ENSG00000115355 | UUCAAAU  |
| ENSG00000115355 | UUCUUGU  |
| ENSG00000115361 | AGGAUGU  |
| ENSG00000115361 | AUGUGGG  |
| ENSG00000115361 | CCAGGAG  |
| ENSG00000115361 | UCUUGAG  |
| ENSG00000115363 | AUAAUAC  |
| ENSG00000115363 | CCUUCAU  |
| ENSG00000115363 | UAAUACA  |
| ENSG00000115363 | UUUCAAC  |
| ENSG00000115364 | AGCAAAA  |
| ENSG00000115364 | GGAUUUC  |
| ENSG00000115365 | ACCCUGU  |
| ENSG00000115365 | CCCUGUU  |
| ENSG00000115365 | UGAGAAG  |
| ENSG00000115365 | UGAGAAU  |
| ENSG00000115365 | UUGUGAC  |
| ENSG00000115380 | ACUAGAU  |
| ENSG00000115380 | CAAAGCA  |
| ENSG00000115380 | CUUACAG  |
| ENSG00000115380 | CUUUGGU  |
| ENSG00000115380 | GAGUGUG  |
| ENSG00000115380 | UUCUAAU  |
| ENSG00000115414 | ACAGUAC  |
| ENSG00000115414 | CAGUAGU  |

|                 |         |
|-----------------|---------|
| ENSG00000115414 | CUUGGAG |
| ENSG00000115414 | GAGUUGA |
| ENSG00000115414 | UGUCUUU |
| ENSG00000115414 | UUGGCAA |
| ENSG00000115415 | AGGAUGU |
| ENSG00000115419 | AAAACUG |
| ENSG00000115419 | AAGUGCU |
| ENSG00000115419 | ACUCCAG |
| ENSG00000115419 | ACUGCAU |
| ENSG00000115419 | AGUAACA |
| ENSG00000115419 | AUCACUA |
| ENSG00000115419 | CCCUGAG |
| ENSG00000115419 | CUGGACU |
| ENSG00000115419 | CUUGGGC |
| ENSG00000115419 | GAGGCUG |
| ENSG00000115419 | GCUAGCA |
| ENSG00000115419 | GUCUCUG |
| ENSG00000115419 | UAUUGCU |
| ENSG00000115419 | UCACAUU |
| ENSG00000115419 | UCCUGU  |
| ENSG00000115419 | UGCAUAG |
| ENSG00000115419 | UUGGUCC |
| ENSG00000115421 | UUCUGCA |
| ENSG00000115425 | UUUCAAC |
| ENSG00000115457 | CGGUGCU |
| ENSG00000115461 | AACUACU |
| ENSG00000115461 | AAGUUGU |
| ENSG00000115461 | ACAGUAC |
| ENSG00000115461 | ACUGGCC |
| ENSG00000115461 | ACUGGCU |
| ENSG00000115461 | AGGGAGG |
| ENSG00000115461 | AGUGCAA |
| ENSG00000115461 | AUGUAAU |
| ENSG00000115461 | CACCAGC |
| ENSG00000115461 | CAGUCUG |
| ENSG00000115461 | CUCCAUU |
| ENSG00000115461 | CUGCUCU |
| ENSG00000115461 | CUGGCUC |
| ENSG00000115461 | CUUCACC |
| ENSG00000115461 | GACAACU |
| ENSG00000115461 | GGAAUGU |
| ENSG00000115461 | GGAGGAG |
| ENSG00000115461 | GGCUCAG |
| ENSG00000115461 | GGGGUGC |
| ENSG00000115461 | UCACCAC |
| ENSG00000115461 | UCCUCU  |
| ENSG00000115461 | UGGGGGA |
| ENSG00000115461 | UGUAUGU |
| ENSG00000115461 | UGUCUGC |
| ENSG00000115461 | UGUCUGG |
| ENSG00000115464 | AAAACUG |
| ENSG00000115464 | AAAUUUC |
| ENSG00000115464 | AAGUGUG |
| ENSG00000115464 | AAUUUUA |
| ENSG00000115464 | ACAUCAC |
| ENSG00000115464 | ACCACAG |
| ENSG00000115464 | AGGACAC |
| ENSG00000115464 | CACAAUG |
| ENSG00000115464 | CAGACAG |
| ENSG00000115464 | CUUGUGU |
| ENSG00000115464 | GCCCUUA |
| ENSG00000115464 | GUAUUCU |
| ENSG00000115464 | GUGCUUG |
| ENSG00000115464 | UGCCUG  |

|                 |          |
|-----------------|----------|
| ENSG00000115464 | UGUGCUU  |
| ENSG00000115464 | UUCAAGC  |
| ENSG00000115464 | UUCCUCG  |
| ENSG00000115468 | CAGCAGG  |
| ENSG00000115468 | CAGUUAC  |
| ENSG00000115468 | UACAAAG  |
| ENSG00000115474 | CAGCAGA  |
| ENSG00000115484 | CAA AUGC |
| ENSG00000115484 | UAAUAUC  |
| ENSG00000115486 | ACUGGCU  |
| ENSG00000115486 | GUGACUG  |
| ENSG00000115486 | UGGCUGC  |
| ENSG00000115507 | AGCAGCA  |
| ENSG00000115507 | CCAGUGU  |
| ENSG00000115507 | GGCGGGG  |
| ENSG00000115514 | UACAAAG  |
| ENSG00000115520 | AAAAGUA  |
| ENSG00000115520 | AACUACU  |
| ENSG00000115520 | AAGUAGC  |
| ENSG00000115520 | CUGGACU  |
| ENSG00000115520 | UAAUAUC  |
| ENSG00000115525 | AACAAAC  |
| ENSG00000115525 | AAGUCUU  |
| ENSG00000115525 | AGUGCUU  |
| ENSG00000115526 | UAUUGCU  |
| ENSG00000115526 | UUGGCAA  |
| ENSG00000115540 | AGCAGCG  |
| ENSG00000115540 | AGCAGCU  |
| ENSG00000115540 | AGUGCUU  |
| ENSG00000115540 | GAGGUAG  |
| ENSG00000115540 | GAUUGUA  |
| ENSG00000115540 | GAUUGUC  |
| ENSG00000115540 | GUGCCAC  |
| ENSG00000115540 | GUAAAUG  |
| ENSG00000115540 | UAUAAAAG |
| ENSG00000115540 | UGAUCCA  |
| ENSG00000115541 | GGAAUGU  |
| ENSG00000115556 | CAGUCCA  |
| ENSG00000115556 | UCCCUUG  |
| ENSG00000115561 | ACAUUCA  |
| ENSG00000115561 | GAGUGUG  |
| ENSG00000115561 | GCAGAAG  |
| ENSG00000115561 | GGAGUGU  |
| ENSG00000115561 | GUAGUGU  |
| ENSG00000115592 | AGUGCCU  |
| ENSG00000115592 | GGCCUG   |
| ENSG00000115594 | CAGGUGA  |
| ENSG00000115594 | GGCUCAG  |
| ENSG00000115594 | GUGCAAA  |
| ENSG00000115594 | UCUCCA   |
| ENSG00000115616 | AAAGUGC  |
| ENSG00000115616 | AAGGCAC  |
| ENSG00000115616 | AAGUGCU  |
| ENSG00000115616 | AGUGCAA  |
| ENSG00000115616 | AGUGCUU  |
| ENSG00000115616 | GCUUCCU  |
| ENSG00000115616 | GUGCAAA  |
| ENSG00000115616 | UAUAAUA  |
| ENSG00000115616 | UCACCAC  |
| ENSG00000115616 | UCUCCA   |
| ENSG00000115616 | UUCAAGC  |
| ENSG00000115616 | UUGGCAA  |
| ENSG00000115649 | AAAAACC  |
| ENSG00000115649 | AAACUGU  |

|                 |         |
|-----------------|---------|
| ENSG00000115649 | ACUGUUU |
| ENSG00000115649 | CCAGGAG |
| ENSG00000115649 | UACAAAG |
| ENSG00000115652 | AAACUGU |
| ENSG00000115652 | AAAGUGC |
| ENSG00000115652 | AAGUCUU |
| ENSG00000115652 | AAGUGCA |
| ENSG00000115652 | AGUGAUC |
| ENSG00000115652 | AGUGCAA |
| ENSG00000115652 | AUGACAC |
| ENSG00000115652 | AUGCAUU |
| ENSG00000115652 | CAGUAGU |
| ENSG00000115652 | UCAUGAU |
| ENSG00000115665 | AUGGCUU |
| ENSG00000115665 | GUGCAA  |
| ENSG00000115677 | AAUCUCA |
| ENSG00000115677 | AAUCUCU |
| ENSG00000115677 | AUUCAUU |
| ENSG00000115677 | AUUGCAC |
| ENSG00000115677 | CAGCAGA |
| ENSG00000115677 | CAGCAGG |
| ENSG00000115677 | CCAGUGC |
| ENSG00000115677 | GAGGUAG |
| ENSG00000115677 | GAGGUAU |
| ENSG00000115677 | UCAUGAU |
| ENSG00000115677 | UCCAGUU |
| ENSG00000115677 | UGCAUAG |
| ENSG00000115677 | UGCUGAC |
| ENSG00000115694 | ACAGUAC |
| ENSG00000115694 | GAAAACA |
| ENSG00000115694 | UGAAAGG |
| ENSG00000115738 | AAAGAGC |
| ENSG00000115738 | AAAGAGG |
| ENSG00000115738 | AACUCUA |
| ENSG00000115738 | AGCAUUC |
| ENSG00000115738 | GCAGAAG |
| ENSG00000115756 | AUGCAUU |
| ENSG00000115756 | CUUCACC |
| ENSG00000115758 | CUACAAA |
| ENSG00000115760 | AAGUGCA |
| ENSG00000115760 | ACAGGUG |
| ENSG00000115760 | AGGUAGU |
| ENSG00000115760 | AGUGCAA |
| ENSG00000115760 | AGUGGUU |
| ENSG00000115760 | AUACAAG |
| ENSG00000115760 | CACAAUG |
| ENSG00000115760 | CUCACAC |
| ENSG00000115760 | CUUACAG |
| ENSG00000115760 | GUAAACA |
| ENSG00000115760 | GUGCUUG |
| ENSG00000115760 | UCCCUUG |
| ENSG00000115760 | UCCUUU  |
| ENSG00000115760 | UCUCACC |
| ENSG00000115760 | UUCCUAG |
| ENSG00000115762 | AUGCACC |
| ENSG00000115762 | AUGCAUU |
| ENSG00000115762 | UAUUGCU |
| ENSG00000115762 | UCCUGAG |
| ENSG00000115762 | UGCCUG  |
| ENSG00000115806 | AGCAGCA |
| ENSG00000115806 | CAGUUAC |
| ENSG00000115806 | CCUUCUG |
| ENSG00000115806 | GGCAGUG |
| ENSG00000115806 | GUGCCAC |

|                 |          |
|-----------------|----------|
| ENSG00000115806 | UAGUGAG  |
| ENSG00000115806 | UUGGUUC  |
| ENSG00000115825 | ACAUUAC  |
| ENSG00000115825 | AGGUUUAU |
| ENSG00000115825 | AGUGCCU  |
| ENSG00000115825 | AUGGCUU  |
| ENSG00000115825 | CAA AUGC |
| ENSG00000115825 | GAAGGAA  |
| ENSG00000115825 | GGCUCAG  |
| ENSG00000115825 | GUGUCAC  |
| ENSG00000115825 | UUAUGCA  |
| ENSG00000115839 | GCUGGUG  |
| ENSG00000115840 | AGUGCAA  |
| ENSG00000115840 | GUGCAA   |
| ENSG00000115840 | UGCAGCU  |
| ENSG00000115844 | AAGGCAC  |
| ENSG00000115844 | AAUCUCA  |
| ENSG00000115844 | AUACAAG  |
| ENSG00000115844 | CAGUAGA  |
| ENSG00000115844 | CAGUAGU  |
| ENSG00000115844 | CUCUCC   |
| ENSG00000115844 | GUCUCUG  |
| ENSG00000115844 | UACAAAG  |
| ENSG00000115844 | UUUGCAA  |
| ENSG00000115844 | UUUGCAC  |
| ENSG00000115844 | UUUUUGC  |
| ENSG00000115875 | AAAUCC   |
| ENSG00000115875 | AAUCUCU  |
| ENSG00000115875 | ACAUCAC  |
| ENSG00000115875 | AGCCUGC  |
| ENSG00000115875 | CACCAGC  |
| ENSG00000115875 | GGUUGAC  |
| ENSG00000115875 | GUGAAUG  |
| ENSG00000115875 | GUGCCAC  |
| ENSG00000115875 | UCAACAG  |
| ENSG00000115875 | UGCAAAG  |
| ENSG00000115884 | AAAAACC  |
| ENSG00000115884 | AAGUGCA  |
| ENSG00000115884 | AAGUGCU  |
| ENSG00000115884 | ACCCA AU |
| ENSG00000115884 | ACCCUGU  |
| ENSG00000115884 | ACUGUAG  |
| ENSG00000115884 | AGCAAAA  |
| ENSG00000115884 | AGGAGCU  |
| ENSG00000115884 | AUAUU AU |
| ENSG00000115884 | CCCUGU   |
| ENSG00000115884 | CUCACAC  |
| ENSG00000115884 | CUUUGGU  |
| ENSG00000115884 | GCAGAAG  |
| ENSG00000115884 | GCUGUCU  |
| ENSG00000115884 | UAUUACC  |
| ENSG00000115884 | UCCAGAG  |
| ENSG00000115884 | UUGGCAA  |
| ENSG00000115896 | AAUACUG  |
| ENSG00000115896 | GUGCAA   |
| ENSG00000115896 | GUUAAUG  |
| ENSG00000115896 | UAAUAGU  |
| ENSG00000115896 | UUCAAAU  |
| ENSG00000115902 | AAGGCAC  |
| ENSG00000115902 | AAUUUUA  |
| ENSG00000115902 | AGGCAGG  |
| ENSG00000115902 | CAAAGCA  |
| ENSG00000115902 | GAGCUAA  |
| ENSG00000115902 | GAGGUAG  |

|                 |          |
|-----------------|----------|
| ENSG00000115902 | GAGGUAU  |
| ENSG00000115902 | UCAUUUG  |
| ENSG00000115904 | AACAGUC  |
| ENSG00000115904 | ACAUUCA  |
| ENSG00000115904 | ACCACAG  |
| ENSG00000115904 | AGCAGCA  |
| ENSG00000115904 | AUAAUAC  |
| ENSG00000115904 | AUCCCUU  |
| ENSG00000115904 | CCCUGUC  |
| ENSG00000115904 | CCUGCUG  |
| ENSG00000115904 | CUUUGGU  |
| ENSG00000115904 | GCAGCAU  |
| ENSG00000115904 | GGCAGCG  |
| ENSG00000115904 | GUAAACA  |
| ENSG00000115904 | UAAUAUC  |
| ENSG00000115904 | UAAUGCU  |
| ENSG00000115904 | UCACAUU  |
| ENSG00000115904 | UUGGCAA  |
| ENSG00000115904 | UUGGCAC  |
| ENSG00000115919 | ACUAGAU  |
| ENSG00000115919 | AGAUGUG  |
| ENSG00000115919 | UGAAAUG  |
| ENSG00000115935 | AAAGAAU  |
| ENSG00000115935 | AACACUG  |
| ENSG00000115935 | AUGGCUU  |
| ENSG00000115935 | CUGGCUC  |
| ENSG00000115935 | CUUUGGU  |
| ENSG00000115935 | GCACCAU  |
| ENSG00000115935 | GUAAACA  |
| ENSG00000115935 | UUCAAAU  |
| ENSG00000115935 | UUGGCAA  |
| ENSG00000115935 | UUGGCAC  |
| ENSG00000115942 | AAGGCAC  |
| ENSG00000115942 | CACUGUU  |
| ENSG00000115942 | CAGCUGG  |
| ENSG00000115942 | CUCCAGC  |
| ENSG00000115942 | UCCAGAG  |
| ENSG00000115942 | UCCAGUU  |
| ENSG00000115942 | UCUGGAA  |
| ENSG00000115942 | UGAAAGG  |
| ENSG00000115944 | AAGUGCA  |
| ENSG00000115944 | AGUGCAA  |
| ENSG00000115946 | CUGGCUC  |
| ENSG00000115946 | UUCUUGU  |
| ENSG00000115947 | UAUAAAAG |
| ENSG00000115956 | ACAUUCA  |
| ENSG00000115963 | AAAGUGC  |
| ENSG00000115977 | AAGGCAC  |
| ENSG00000115977 | AAGUGCA  |
| ENSG00000115977 | ACAUUAC  |
| ENSG00000115977 | ACCCUGU  |
| ENSG00000115977 | ACCUGGA  |
| ENSG00000115977 | ACUGGCC  |
| ENSG00000115977 | ACUGGCU  |
| ENSG00000115977 | AGGAGCU  |
| ENSG00000115977 | AGGCAGG  |
| ENSG00000115977 | AGGUAGU  |
| ENSG00000115977 | AUGGCAC  |
| ENSG00000115977 | AUGUCUG  |
| ENSG00000115977 | AUUGCAC  |
| ENSG00000115977 | CAGCAAA  |
| ENSG00000115977 | CAGCUGG  |
| ENSG00000115977 | CCAGCAU  |
| ENSG00000115977 | CCAUUAC  |



|                 |         |
|-----------------|---------|
| ENSG00000115977 | CCUGCUG |
| ENSG00000115977 | CCUGUAC |
| ENSG00000115977 | CUCCAGC |
| ENSG00000115977 | CUGGGGG |
| ENSG00000115977 | CUUGGAG |
| ENSG00000115977 | CUUGGGC |
| ENSG00000115977 | CUUUGGU |
| ENSG00000115977 | GAAGGAA |
| ENSG00000115977 | GACCAUG |
| ENSG00000115977 | GACUUCC |
| ENSG00000115977 | GAGGUAG |
| ENSG00000115977 | GAUAUGU |
| ENSG00000115977 | GCAGGUU |
| ENSG00000115977 | GCUACAU |
| ENSG00000115977 | GGACCUG |
| ENSG00000115977 | GGAGGAG |
| ENSG00000115977 | GGUCUAG |
| ENSG00000115977 | GUAUGUU |
| ENSG00000115977 | GUCAUUG |
| ENSG00000115977 | GUGCAA  |
| ENSG00000115977 | UAAUGCU |
| ENSG00000115977 | UAGAGGA |
| ENSG00000115977 | UCACAGG |
| ENSG00000115977 | UCACAGU |
| ENSG00000115977 | UCAUAGA |
| ENSG00000115977 | UCAUUUG |
| ENSG00000115977 | UCCCUUG |
| ENSG00000115977 | UCGCUGC |
| ENSG00000115977 | UGAAGCU |
| ENSG00000115977 | UGCAUAG |
| ENSG00000115977 | UGCCAGC |
| ENSG00000115977 | UGUCUGG |
| ENSG00000115977 | UUGGUCC |
| ENSG00000115993 | AGCAAAA |
| ENSG00000115993 | AUCCUUG |
| ENSG00000115993 | AUCCUUU |
| ENSG00000115993 | AUGCAUU |
| ENSG00000115993 | AUUGCAC |
| ENSG00000115993 | CAAAGCA |
| ENSG00000115993 | GCCUGAU |
| ENSG00000115993 | UGAGAAU |
| ENSG00000115993 | UGCAUAG |
| ENSG00000116001 | AAGGCAC |
| ENSG00000116001 | AGAUAAA |
| ENSG00000116001 | UUCUGCA |
| ENSG00000116001 | UUUGCAC |
| ENSG00000116005 | AAAAAUC |
| ENSG00000116005 | AAUCACU |
| ENSG00000116005 | UCACAAG |
| ENSG00000116016 | AAAGUAC |
| ENSG00000116016 | AAAGUUU |
| ENSG00000116016 | AGUGCUU |
| ENSG00000116016 | AUGUGCC |
| ENSG00000116016 | CAGUAGA |
| ENSG00000116016 | CAGUAGU |
| ENSG00000116016 | CUUGUAU |
| ENSG00000116016 | CUUUGGU |
| ENSG00000116016 | GACCUGG |
| ENSG00000116016 | GAUCAGA |
| ENSG00000116016 | GCAACUU |
| ENSG00000116016 | GCUUCCU |
| ENSG00000116016 | GUCAGUU |
| ENSG00000116016 | UAAUAUC |
| ENSG00000116016 | UAAUGCU |

|                 |         |
|-----------------|---------|
| ENSG00000116016 | UCAUGAU |
| ENSG00000116017 | CAGUGCA |
| ENSG00000116017 | CCCUGAG |
| ENSG00000116017 | GAGGUAG |
| ENSG00000116017 | GAGGUAU |
| ENSG00000116017 | GUAAACA |
| ENSG00000116017 | UCAAGUA |
| ENSG00000116017 | UCCCUGU |
| ENSG00000116031 | GCAGCAU |
| ENSG00000116031 | UGGGACA |
| ENSG00000116032 | UGUAUAA |
| ENSG00000116035 | GUCUCUG |
| ENSG00000116035 | UUCUUGU |
| ENSG00000116095 | AAGUGCA |
| ENSG00000116095 | UGCAUUA |
| ENSG00000116096 | AGGCAGG |
| ENSG00000116106 | AACUACU |
| ENSG00000116106 | CAAGAGC |
| ENSG00000116106 | CAUGGAU |
| ENSG00000116106 | GAGGUAG |
| ENSG00000116106 | GAGGUAU |
| ENSG00000116106 | GUCACUC |
| ENSG00000116106 | UAAUACA |
| ENSG00000116106 | UACAAAG |
| ENSG00000116106 | UCCUUGC |
| ENSG00000116106 | UGCAUUG |
| ENSG00000116127 | AAAAACC |
| ENSG00000116128 | AAAGUAA |
| ENSG00000116128 | ACAUUCA |
| ENSG00000116128 | CUAUACA |
| ENSG00000116128 | CUCAAAC |
| ENSG00000116128 | UCCCUUU |
| ENSG00000116128 | UCUCAAG |
| ENSG00000116128 | UGCAGCU |
| ENSG00000116132 | AAAGUGC |
| ENSG00000116132 | AAGUGUG |
| ENSG00000116132 | AAUUUUA |
| ENSG00000116132 | ACAGUAC |
| ENSG00000116132 | AGGGAGG |
| ENSG00000116132 | AGUGCUG |
| ENSG00000116132 | CAAAGCA |
| ENSG00000116132 | CAAAGUG |
| ENSG00000116132 | CAGCAGA |
| ENSG00000116132 | CCUGCUG |
| ENSG00000116132 | CUACAAA |
| ENSG00000116132 | GAGGUAG |
| ENSG00000116132 | GAGGUAU |
| ENSG00000116132 | GGAGGAG |
| ENSG00000116132 | GUCACUC |
| ENSG00000116132 | GUGAGGU |
| ENSG00000116132 | UAAUAGU |
| ENSG00000116132 | UACAAAG |
| ENSG00000116132 | UUGGUCC |
| ENSG00000116133 | AAGGCAC |
| ENSG00000116133 | CCUUCAU |
| ENSG00000116133 | GACCUGG |
| ENSG00000116133 | GGCUCUG |
| ENSG00000116133 | GGGGCAG |
| ENSG00000116133 | UUAGGAU |
| ENSG00000116133 | UUGGCAA |
| ENSG00000116133 | UUGGCAC |
| ENSG00000116138 | AAAGUGC |
| ENSG00000116138 | ACUGGCC |
| ENSG00000116138 | AGCAGCA |

|                 |          |
|-----------------|----------|
| ENSG00000116138 | AGCAGCG  |
| ENSG00000116138 | AGCUGCC  |
| ENSG00000116138 | AGCUUUAU |
| ENSG00000116138 | AGGUUUAU |
| ENSG00000116138 | AGUGCCU  |
| ENSG00000116138 | AUGGCUU  |
| ENSG00000116138 | CACAAUG  |
| ENSG00000116138 | CAGUGCA  |
| ENSG00000116138 | CCUUCUU  |
| ENSG00000116138 | GAGGCAG  |
| ENSG00000116138 | GUGCCUG  |
| ENSG00000116138 | UACAAAG  |
| ENSG00000116138 | UCACAAG  |
| ENSG00000116138 | UCCUUGC  |
| ENSG00000116138 | UUGUUCG  |
| ENSG00000116141 | AAGGCAC  |
| ENSG00000116141 | CCUGUAC  |
| ENSG00000116141 | CUAUACA  |
| ENSG00000116141 | GACAACU  |
| ENSG00000116141 | UAUUGCU  |
| ENSG00000116141 | UCCUGAG  |
| ENSG00000116147 | CAGCAGA  |
| ENSG00000116147 | CAUAUUG  |
| ENSG00000116147 | CCUUCAU  |
| ENSG00000116147 | UAUAAAG  |
| ENSG00000116157 | AGCACCA  |
| ENSG00000116157 | GCACCAU  |
| ENSG00000116161 | CCAGUAC  |
| ENSG00000116161 | CUGGAAA  |
| ENSG00000116161 | UGCAGCU  |
| ENSG00000116194 | AACAUUC  |
| ENSG00000116194 | CAAAACU  |
| ENSG00000116194 | UGAAAUG  |
| ENSG00000116199 | AAUCCUU  |
| ENSG00000116199 | AGUGCAA  |
| ENSG00000116199 | AUCCUUG  |
| ENSG00000116199 | CACCACC  |
| ENSG00000116199 | GAUUGUC  |
| ENSG00000116199 | GGCUCAG  |
| ENSG00000116199 | UGUGCUU  |
| ENSG00000116205 | ACUCAGG  |
| ENSG00000116205 | CAGUUAC  |
| ENSG00000116205 | CCAUUAC  |
| ENSG00000116205 | CCCCUGG  |
| ENSG00000116205 | CUCAGGG  |
| ENSG00000116205 | CUCCAUI  |
| ENSG00000116205 | CUGCAGG  |
| ENSG00000116205 | CUUCUCU  |
| ENSG00000116205 | GAAGGUC  |
| ENSG00000116205 | GAGAAAU  |
| ENSG00000116205 | GCACCAU  |
| ENSG00000116205 | GUGACAG  |
| ENSG00000116205 | UAAGACU  |
| ENSG00000116205 | UAGAGGA  |
| ENSG00000116205 | UGGGGGA  |
| ENSG00000116205 | UUAGAGA  |
| ENSG00000116205 | UUCAAAU  |
| ENSG00000116205 | UUCCUAG  |
| ENSG00000116205 | UUCUGCA  |
| ENSG00000116213 | UACAAAG  |
| ENSG00000116218 | UUGUGAC  |
| ENSG00000116237 | AAAGAAU  |
| ENSG00000116237 | AAAGUGC  |
| ENSG00000116237 | AAGGCAC  |

|                 |         |
|-----------------|---------|
| ENSG00000116237 | ACCCGUA |
| ENSG00000116237 | CCUUCUG |
| ENSG00000116237 | CUUUGGU |
| ENSG00000116237 | GAGGUAG |
| ENSG00000116237 | GAGGUAU |
| ENSG00000116237 | GCCUGGG |
| ENSG00000116237 | GUGAGGU |
| ENSG00000116237 | UAUUGCU |
| ENSG00000116237 | UCACAUU |
| ENSG00000116237 | UGCUGAC |
| ENSG00000116251 | ACUGCAG |
| ENSG00000116251 | AUACAAG |
| ENSG00000116251 | GCUGGAU |
| ENSG00000116254 | AAAGUAA |
| ENSG00000116254 | AAAGUGC |
| ENSG00000116254 | AACCUGU |
| ENSG00000116254 | AAGUCUU |
| ENSG00000116254 | AAGUGCA |
| ENSG00000116254 | ACACACC |
| ENSG00000116254 | ACACACU |
| ENSG00000116254 | AGCAGCA |
| ENSG00000116254 | AGUGCAA |
| ENSG00000116254 | CAGCAA  |
| ENSG00000116254 | CGUGGCC |
| ENSG00000116254 | GGCAGGG |
| ENSG00000116254 | GUAAACA |
| ENSG00000116254 | GUGCAA  |
| ENSG00000116254 | GUGGCC  |
| ENSG00000116254 | UACAAAG |
| ENSG00000116254 | UCAAGUA |
| ENSG00000116254 | UCUGGAA |
| ENSG00000116260 | AACAAAC |
| ENSG00000116266 | CAAAGCA |
| ENSG00000116266 | UCAUACA |
| ENSG00000116273 | ACUGCAG |
| ENSG00000116273 | AGCAGCU |
| ENSG00000116273 | AGCUGCC |
| ENSG00000116273 | AUGGCUU |
| ENSG00000116273 | CGUGCAU |
| ENSG00000116273 | CUUUGGU |
| ENSG00000116273 | GUAAACA |
| ENSG00000116273 | UACAAAG |
| ENSG00000116273 | UCACAGG |
| ENSG00000116273 | UCACAGU |
| ENSG00000116273 | UGCAGCU |
| ENSG00000116273 | UGCAUAG |
| ENSG00000116273 | UGUCUGG |
| ENSG00000116273 | UUGGCAC |
| ENSG00000116285 | AAUCCUU |
| ENSG00000116285 | ACCAGCA |
| ENSG00000116285 | AUCCUUU |
| ENSG00000116285 | CAGCAGA |
| ENSG00000116285 | CAGCAGG |
| ENSG00000116285 | CUUGUGU |
| ENSG00000116285 | GCAGAAG |
| ENSG00000116285 | GUGCUUG |
| ENSG00000116285 | UAGUGAG |
| ENSG00000116285 | UCAUUUG |
| ENSG00000116285 | UGUGCUU |
| ENSG00000116299 | UUGGCAA |
| ENSG00000116299 | UUGGCAC |
| ENSG00000116329 | GAGGGGC |
| ENSG00000116337 | AACACUG |
| ENSG00000116337 | UCCACA  |

|                 |         |
|-----------------|---------|
| ENSG00000116396 | ACAGUAU |
| ENSG00000116396 | AGCAGCA |
| ENSG00000116396 | AUGUGCC |
| ENSG00000116396 | AUUGCAC |
| ENSG00000116396 | CAGACAG |
| ENSG00000116396 | GAGGUAG |
| ENSG00000116396 | GCAGCAU |
| ENSG00000116396 | GGCUCUG |
| ENSG00000116396 | GGGGCAG |
| ENSG00000116396 | UGUCUUU |
| ENSG00000116406 | ACAGUAC |
| ENSG00000116406 | AUGGCUU |
| ENSG00000116406 | CACAGUG |
| ENSG00000116406 | CUGACUC |
| ENSG00000116406 | CUUCACC |
| ENSG00000116406 | CUUUGGU |
| ENSG00000116406 | GAGGUAG |
| ENSG00000116406 | GAGGUAU |
| ENSG00000116406 | GCAACUU |
| ENSG00000116406 | GGCAGUG |
| ENSG00000116406 | GGUAGAC |
| ENSG00000116406 | GGUUUAC |
| ENSG00000116406 | GUAGUGU |
| ENSG00000116406 | GUCAACA |
| ENSG00000116406 | UAUAAAG |
| ENSG00000116406 | UCACAGG |
| ENSG00000116406 | UCAUUCG |
| ENSG00000116406 | UGUAUAA |
| ENSG00000116406 | UUCUAAU |
| ENSG00000116406 | UUGGCAA |
| ENSG00000116406 | UUGGCAC |
| ENSG00000116406 | UUGGUUC |
| ENSG00000116459 | ACUGGCC |
| ENSG00000116473 | AAAGCUG |
| ENSG00000116473 | ACCCAUU |
| ENSG00000116473 | ACUCAAA |
| ENSG00000116473 | AGUGCUG |
| ENSG00000116473 | AUGCACC |
| ENSG00000116473 | CAAAGCA |
| ENSG00000116473 | CUGGCUC |
| ENSG00000116473 | CUUCACC |
| ENSG00000116473 | GAGCUGC |
| ENSG00000116473 | GAGUUGG |
| ENSG00000116473 | GGAAUGU |
| ENSG00000116473 | GUGCUUG |
| ENSG00000116473 | UCAUUCG |
| ENSG00000116473 | UUAUGCA |
| ENSG00000116478 | AUAUAAC |
| ENSG00000116478 | UAUUACC |
| ENSG00000116489 | AAGUCUU |
| ENSG00000116497 | AACCUGU |
| ENSG00000116497 | UCACAUU |
| ENSG00000116514 | AGUGUGC |
| ENSG00000116514 | UGUGCUU |
| ENSG00000116521 | UCCAGUU |
| ENSG00000116525 | AAAAAUC |
| ENSG00000116525 | AAUACUG |
| ENSG00000116525 | CUGGAAA |
| ENSG00000116525 | GGAUGAG |
| ENSG00000116539 | AACAUUC |
| ENSG00000116539 | AAGUGCU |
| ENSG00000116539 | AAUACUG |
| ENSG00000116539 | ACAGUAC |
| ENSG00000116539 | ACAGUAU |

|                 |          |
|-----------------|----------|
| ENSG00000116539 | ACUAGAU  |
| ENSG00000116539 | AGAUAAA  |
| ENSG00000116539 | AGCAGCG  |
| ENSG00000116539 | AGGACAC  |
| ENSG00000116539 | AGUGCUG  |
| ENSG00000116539 | AUAUUUAU |
| ENSG00000116539 | AUGCAUU  |
| ENSG00000116539 | CAAAACU  |
| ENSG00000116539 | CCCACCU  |
| ENSG00000116539 | CUGCUCA  |
| ENSG00000116539 | CUUCUCU  |
| ENSG00000116539 | GAGAUGA  |
| ENSG00000116539 | GAUUGUA  |
| ENSG00000116539 | GGAAUGU  |
| ENSG00000116539 | GGCGGGG  |
| ENSG00000116539 | GUCUCUG  |
| ENSG00000116539 | GUUAGGA  |
| ENSG00000116539 | UAUUGCU  |
| ENSG00000116539 | UCAACAG  |
| ENSG00000116539 | UCACACA  |
| ENSG00000116539 | UGUCUUU  |
| ENSG00000116539 | UUCCAUA  |
| ENSG00000116539 | UUGGCAC  |
| ENSG00000116539 | UUGGUCC  |
| ENSG00000116539 | UUUUUGC  |
| ENSG00000116544 | ACAGUAC  |
| ENSG00000116544 | CACAGUG  |
| ENSG00000116544 | UCACAGU  |
| ENSG00000116544 | UUGGUCC  |
| ENSG00000116560 | AACACUG  |
| ENSG00000116560 | ACUGCAU  |
| ENSG00000116574 | AAGUAGC  |
| ENSG00000116574 | CAAAGCA  |
| ENSG00000116574 | UGCAUAG  |
| ENSG00000116574 | UGCAUAU  |
| ENSG00000116580 | CCAGUGC  |
| ENSG00000116580 | GCAUCCC  |
| ENSG00000116584 | AAAAAUC  |
| ENSG00000116584 | AUGGCUU  |
| ENSG00000116584 | CAGUAGU  |
| ENSG00000116584 | CUUUGGU  |
| ENSG00000116584 | GAAAACA  |
| ENSG00000116584 | GGGCCCC  |
| ENSG00000116584 | GUAGUGU  |
| ENSG00000116584 | UGGUACC  |
| ENSG00000116584 | UUGGUUC  |
| ENSG00000116604 | AAAAAUC  |
| ENSG00000116604 | AAAACUG  |
| ENSG00000116604 | AACCUUG  |
| ENSG00000116604 | AACUCUA  |
| ENSG00000116604 | AAGGUGC  |
| ENSG00000116604 | AAUACUG  |
| ENSG00000116604 | AAUCUCA  |
| ENSG00000116604 | AAUUAUU  |
| ENSG00000116604 | ACAAUAU  |
| ENSG00000116604 | ACAGUAC  |
| ENSG00000116604 | ACAGUAU  |
| ENSG00000116604 | ACUCCAG  |
| ENSG00000116604 | ACUUGGA  |
| ENSG00000116604 | AGGGAGG  |
| ENSG00000116604 | CAAAACU  |
| ENSG00000116604 | CAAAGUG  |
| ENSG00000116604 | CAAGAGC  |
| ENSG00000116604 | CAGCAGA  |

|                 |         |
|-----------------|---------|
| ENSG00000116604 | CCAGGAG |
| ENSG00000116604 | CCAGUGC |
| ENSG00000116604 | CCAGUGU |
| ENSG00000116604 | CCCUGAG |
| ENSG00000116604 | CUGCAGC |
| ENSG00000116604 | CUGCCCC |
| ENSG00000116604 | CUGGACU |
| ENSG00000116604 | GAGGUAG |
| ENSG00000116604 | GAUUGUA |
| ENSG00000116604 | GCCUGGA |
| ENSG00000116604 | GGACUGC |
| ENSG00000116604 | GGAGGAG |
| ENSG00000116604 | GGAGUGU |
| ENSG00000116604 | GGGAGCU |
| ENSG00000116604 | GGGCCCC |
| ENSG00000116604 | GUAAACA |
| ENSG00000116604 | GUCAACA |
| ENSG00000116604 | GUCUCUG |
| ENSG00000116604 | GUGCAAA |
| ENSG00000116604 | UACAGUU |
| ENSG00000116604 | UAUUACC |
| ENSG00000116604 | UGCAAAG |
| ENSG00000116604 | UGGACUG |
| ENSG00000116604 | UGGGACA |
| ENSG00000116604 | UGGGUGA |
| ENSG00000116604 | UUCAAAU |
| ENSG00000116604 | UUGACAC |
| ENSG00000116604 | UUGGCAA |
| ENSG00000116604 | UUGGCAC |
| ENSG00000116604 | UUGGUUC |
| ENSG00000116604 | UUUCAAC |
| ENSG00000116641 | AAAUUUC |
| ENSG00000116641 | AACAUUC |
| ENSG00000116641 | ACAUUCA |
| ENSG00000116641 | UCACAUU |
| ENSG00000116649 | CAGACAG |
| ENSG00000116663 | GCCUGGA |
| ENSG00000116667 | AAAAACC |
| ENSG00000116667 | AAGGUGC |
| ENSG00000116667 | AGCAGCG |
| ENSG00000116667 | AGCAGCU |
| ENSG00000116667 | AGUAACA |
| ENSG00000116667 | AGUGCUU |
| ENSG00000116667 | AUGUAAU |
| ENSG00000116667 | CAAAGCA |
| ENSG00000116667 | CACAGUG |
| ENSG00000116667 | CACCACC |
| ENSG00000116667 | CAGACAG |
| ENSG00000116667 | CAGUAGU |
| ENSG00000116667 | CCUGUAC |
| ENSG00000116667 | CUCUUCC |
| ENSG00000116667 | CUGGACU |
| ENSG00000116667 | CUUCUCU |
| ENSG00000116667 | GAAAACA |
| ENSG00000116667 | GAUUGUA |
| ENSG00000116667 | GAUUGUC |
| ENSG00000116667 | GCAGAAG |
| ENSG00000116667 | GGAAGAC |
| ENSG00000116667 | GGAUGAG |
| ENSG00000116667 | GGGGUGC |
| ENSG00000116667 | GGGGUGG |
| ENSG00000116667 | GUGACAG |
| ENSG00000116667 | UAAUAGU |
| ENSG00000116667 | UACAGUU |

|                 |         |
|-----------------|---------|
| ENSG00000116667 | UCACAGU |
| ENSG00000116667 | UCAUAGA |
| ENSG00000116667 | UGAAAGG |
| ENSG00000116667 | UGAGAAU |
| ENSG00000116667 | UGGCUGC |
| ENSG00000116667 | UGUCUUU |
| ENSG00000116667 | UUCAAGC |
| ENSG00000116668 | GAGGUAG |
| ENSG00000116670 | ACUUGGA |
| ENSG00000116675 | AAAGGUA |
| ENSG00000116675 | ACACACU |
| ENSG00000116675 | AUAUUAU |
| ENSG00000116675 | AUGCCUU |
| ENSG00000116675 | CUGCAGG |
| ENSG00000116675 | GAUUGUA |
| ENSG00000116675 | GGGGUCC |
| ENSG00000116675 | GUCAGUU |
| ENSG00000116675 | GUCCAGA |
| ENSG00000116675 | UAAUAUC |
| ENSG00000116675 | UCACAAG |
| ENSG00000116675 | UGACAUC |
| ENSG00000116675 | UGUCUUU |
| ENSG00000116675 | UUCAAAU |
| ENSG00000116675 | UUGACAC |
| ENSG00000116678 | AGUGAUC |
| ENSG00000116678 | CCUUCUU |
| ENSG00000116678 | GACCUGG |
| ENSG00000116678 | UAGACUG |
| ENSG00000116678 | UCAUGAU |
| ENSG00000116678 | UUCUAAU |
| ENSG00000116679 | AUCACUA |
| ENSG00000116679 | CCUUCAU |
| ENSG00000116679 | GGAUUUC |
| ENSG00000116679 | UAUAAAG |
| ENSG00000116679 | UUGUGUC |
| ENSG00000116685 | AAGGCAC |
| ENSG00000116688 | GCAGCAU |
| ENSG00000116698 | AAAGCUG |
| ENSG00000116698 | AACAUUC |
| ENSG00000116698 | ACACACU |
| ENSG00000116698 | AGCAGCU |
| ENSG00000116698 | CAAAGCA |
| ENSG00000116698 | UGCAGCU |
| ENSG00000116698 | UUUCAAC |
| ENSG00000116701 | GAAACAU |
| ENSG00000116704 | GAUUGUA |
| ENSG00000116717 | AAUCCUU |
| ENSG00000116729 | AAAGCUG |
| ENSG00000116729 | AGCAAAA |
| ENSG00000116729 | GAGAAGA |
| ENSG00000116729 | UGGACUG |
| ENSG00000116731 | AAAACUG |
| ENSG00000116731 | AAGGCAC |
| ENSG00000116731 | ACUGCAG |
| ENSG00000116731 | AGCCCUU |
| ENSG00000116731 | AGGAGCU |
| ENSG00000116731 | CUGGAAA |
| ENSG00000116731 | CUUCACC |
| ENSG00000116731 | GGGUGGU |
| ENSG00000116731 | GUCUACU |
| ENSG00000116731 | GUGCCUG |
| ENSG00000116731 | UACAGUU |
| ENSG00000116731 | UAUAAAG |
| ENSG00000116731 | UCACAUU |



|                 |          |
|-----------------|----------|
| ENSG00000116731 | UGCAUUAU |
| ENSG00000116741 | AAAGUAU  |
| ENSG00000116741 | AAAUUUC  |
| ENSG00000116741 | GUAAACA  |
| ENSG00000116747 | CAAGAGC  |
| ENSG00000116747 | CACAGUG  |
| ENSG00000116747 | GAGUAUU  |
| ENSG00000116747 | UCACAGU  |
| ENSG00000116750 | AUGAUGC  |
| ENSG00000116750 | AUGCAUU  |
| ENSG00000116750 | GCAGGUU  |
| ENSG00000116754 | AAACUGU  |
| ENSG00000116754 | ACAUCAC  |
| ENSG00000116754 | ACUGUAG  |
| ENSG00000116754 | AUGACAC  |
| ENSG00000116754 | AUGGCAC  |
| ENSG00000116754 | CUUGUAU  |
| ENSG00000116761 | AAAAAUC  |
| ENSG00000116774 | GGAUUUU  |
| ENSG00000116774 | UAAUGCU  |
| ENSG00000116783 | GAGACCU  |
| ENSG00000116783 | GCUGUCU  |
| ENSG00000116783 | GUCAGUU  |
| ENSG00000116786 | AUAUAAC  |
| ENSG00000116786 | CUGCCCC  |
| ENSG00000116793 | AAAAGUA  |
| ENSG00000116819 | AUUGCAC  |
| ENSG00000116819 | GCCUGGA  |
| ENSG00000116819 | GUGCUUG  |
| ENSG00000116819 | UCAAGUA  |
| ENSG00000116830 | GAGCCCU  |
| ENSG00000116833 | AAAGAAU  |
| ENSG00000116833 | AAUCUCA  |
| ENSG00000116833 | ACCCUGU  |
| ENSG00000116833 | CACAGUG  |
| ENSG00000116833 | CUUGGAG  |
| ENSG00000116833 | GUAAACA  |
| ENSG00000116833 | GUCUACU  |
| ENSG00000116833 | UCACAGG  |
| ENSG00000116833 | UGAUCCA  |
| ENSG00000116852 | AACAGUC  |
| ENSG00000116852 | AAGGCAC  |
| ENSG00000116852 | AAUGCCC  |
| ENSG00000116852 | ACUCCAG  |
| ENSG00000116852 | AGCAAAA  |
| ENSG00000116852 | AGCAGCU  |
| ENSG00000116852 | AGGCAGG  |
| ENSG00000116852 | CAGCAA   |
| ENSG00000116852 | CAGGCUC  |
| ENSG00000116852 | CUGCCCC  |
| ENSG00000116852 | CUUACAG  |
| ENSG00000116852 | CUUCACC  |
| ENSG00000116852 | CUUCUCU  |
| ENSG00000116852 | GAGGCAG  |
| ENSG00000116852 | GAGGUAG  |
| ENSG00000116852 | GAGGUAU  |
| ENSG00000116852 | GCCCUUA  |
| ENSG00000116852 | GCUUCCU  |
| ENSG00000116852 | GGAGGCA  |
| ENSG00000116852 | GGCUCAG  |
| ENSG00000116852 | GUAAACA  |
| ENSG00000116852 | GUGAGGU  |
| ENSG00000116852 | GUGCUUG  |
| ENSG00000116852 | UCAAGUA  |

|                 |         |
|-----------------|---------|
| ENSG00000116852 | UCACAGU |
| ENSG00000116857 | AUGGCUU |
| ENSG00000116863 | ACUGGCU |
| ENSG00000116863 | UAUUGCU |
| ENSG00000116863 | UUGGUCC |
| ENSG00000116871 | AAAAACC |
| ENSG00000116871 | CUGGCUC |
| ENSG00000116871 | UCACAUU |
| ENSG00000116871 | UCUGGAA |
| ENSG00000116874 | AAAGCUG |
| ENSG00000116874 | AGCUGCC |
| ENSG00000116903 | AGUGAUC |
| ENSG00000116903 | AUGGCAC |
| ENSG00000116903 | UUCAAAU |
| ENSG00000116918 | CUUUGGU |
| ENSG00000116918 | UGCUGAC |
| ENSG00000116922 | CCCCUGG |
| ENSG00000116922 | GACCUGG |
| ENSG00000116922 | GGACCUG |
| ENSG00000116922 | UCUGGAA |
| ENSG00000116957 | AAAUGGU |
| ENSG00000116962 | AGCACCA |
| ENSG00000116962 | GUAAACA |
| ENSG00000116962 | UAUAAAG |
| ENSG00000116977 | AAUCACU |
| ENSG00000116977 | ACAGGUG |
| ENSG00000116977 | UUGAUCA |
| ENSG00000116983 | ACCACAG |
| ENSG00000116983 | AGCAGCA |
| ENSG00000116983 | AGGCAGG |
| ENSG00000116983 | AUGAGCU |
| ENSG00000116983 | CAAAGCA |
| ENSG00000116983 | CACCAGC |
| ENSG00000116983 | CUCUUCC |
| ENSG00000116983 | CUGCCCC |
| ENSG00000116983 | CUUGGGC |
| ENSG00000116983 | GGAAGAC |
| ENSG00000116983 | GGACCUG |
| ENSG00000116983 | GGCAGGG |
| ENSG00000116983 | GGUGGUC |
| ENSG00000116983 | GUCCAGA |
| ENSG00000116983 | GUCUCUG |
| ENSG00000116983 | GUGAGGU |
| ENSG00000116983 | UCCAGAG |
| ENSG00000116983 | UGGCCCU |
| ENSG00000116983 | UUGGUUC |
| ENSG00000116984 | CUCAAAC |
| ENSG00000116984 | CUUUGGU |
| ENSG00000116984 | GAGGUAU |
| ENSG00000116984 | GUGAGGU |
| ENSG00000116984 | UCAUUUG |
| ENSG00000116984 | UCCAGUU |
| ENSG00000116984 | UCUCACC |
| ENSG00000116984 | UCUCCAA |
| ENSG00000116984 | UUCUGCA |
| ENSG00000116985 | CACUCCU |
| ENSG00000116985 | CAGCUGG |
| ENSG00000116985 | CCUGCUG |
| ENSG00000116985 | CUGGACU |
| ENSG00000116985 | GCUGUCU |
| ENSG00000116985 | GUCACUC |
| ENSG00000116985 | UCACAGG |
| ENSG00000116990 | AAAGUGC |
| ENSG00000116990 | AAAUUUC |

|                 |         |
|-----------------|---------|
| ENSG00000116990 | AAUCACU |
| ENSG00000116990 | ACUGUAG |
| ENSG00000116990 | AGCUGCC |
| ENSG00000116990 | AUGCAUU |
| ENSG00000116990 | CACCACC |
| ENSG00000116990 | CUGGAAA |
| ENSG00000116990 | CUUCACC |
| ENSG00000116990 | GAGGUAG |
| ENSG00000116990 | GAGGUAU |
| ENSG00000116990 | GAGUGUG |
| ENSG00000116990 | GGAUGAG |
| ENSG00000116990 | GGGAUCG |
| ENSG00000116990 | UCCCUUG |
| ENSG00000116990 | UGAGAAG |
| ENSG00000116990 | UGAGAAU |
| ENSG00000116990 | UGCAAAG |
| ENSG00000116990 | UGGGAUC |
| ENSG00000116990 | UGUGUGG |
| ENSG00000116990 | UUCAAAU |
| ENSG00000116990 | UUUGCAA |
| ENSG00000116991 | AAAAAUC |
| ENSG00000116991 | AAAGUAA |
| ENSG00000116991 | AAAGUAC |
| ENSG00000116991 | AACACUG |
| ENSG00000116991 | AACUACU |
| ENSG00000116991 | AAUUGCU |
| ENSG00000116991 | ACUGUAG |
| ENSG00000116991 | AGAUAAA |
| ENSG00000116991 | AGCAGCG |
| ENSG00000116991 | AGCAGCU |
| ENSG00000116991 | AGUGCAA |
| ENSG00000116991 | CAAAGCA |
| ENSG00000116991 | CUAUACA |
| ENSG00000116991 | CUCAAAC |
| ENSG00000116991 | GCACCAU |
| ENSG00000116991 | GCAGCAU |
| ENSG00000116991 | GUUCAUG |
| ENSG00000116991 | UACAAAG |
| ENSG00000116991 | UAUAAAG |
| ENSG00000117000 | ACUCAAA |
| ENSG00000117000 | CAAAGCA |
| ENSG00000117000 | GGAAGCC |
| ENSG00000117000 | UCAAGUA |
| ENSG00000117000 | UGGGUGA |
| ENSG00000117009 | GAGCCCU |
| ENSG00000117013 | AAUACUG |
| ENSG00000117013 | UCAAGUA |
| ENSG00000117016 | AAUACUG |
| ENSG00000117016 | ACAUAGA |
| ENSG00000117016 | ACUGUAG |
| ENSG00000117016 | AGCAGCA |
| ENSG00000117016 | AGCCCUU |
| ENSG00000117016 | AGGCAGG |
| ENSG00000117016 | AGUGUGC |
| ENSG00000117016 | AUGCAUU |
| ENSG00000117016 | CAAAGCA |
| ENSG00000117016 | CAGCAGG |
| ENSG00000117016 | CAGCUGG |
| ENSG00000117016 | CUGGAAA |
| ENSG00000117016 | CUUUGGU |
| ENSG00000117016 | GAGCCCC |
| ENSG00000117016 | GAGGCAG |
| ENSG00000117016 | GAGGUAG |
| ENSG00000117016 | GAGGUAU |

|                 |          |
|-----------------|----------|
| ENSG00000117016 | GCAGGAC  |
| ENSG00000117016 | GCUGGUG  |
| ENSG00000117016 | GGCAGUG  |
| ENSG00000117016 | GGCAUUG  |
| ENSG00000117016 | UAUUGCU  |
| ENSG00000117016 | UCACAGG  |
| ENSG00000117016 | UCCCUCU  |
| ENSG00000117016 | UGCCAGC  |
| ENSG00000117016 | UGGGACA  |
| ENSG00000117016 | UGUCUUU  |
| ENSG00000117016 | UGUGCUU  |
| ENSG00000117016 | UUCAAAU  |
| ENSG00000117016 | UUGGCAA  |
| ENSG00000117016 | UUGGCAC  |
| ENSG00000117020 | AAAGUGC  |
| ENSG00000117036 | UUCUAAU  |
| ENSG00000117069 | AAUACUG  |
| ENSG00000117069 | UCACACA  |
| ENSG00000117090 | UGCAAAG  |
| ENSG00000117114 | AAAAAUC  |
| ENSG00000117114 | AACAAAC  |
| ENSG00000117114 | AAGUCUU  |
| ENSG00000117114 | AAUUAAU  |
| ENSG00000117114 | ACAAUAU  |
| ENSG00000117114 | ACAGUAC  |
| ENSG00000117114 | ACAGUAU  |
| ENSG00000117114 | AGCAGCA  |
| ENSG00000117114 | AGGCAGG  |
| ENSG00000117114 | AUACAAG  |
| ENSG00000117114 | AUAUAAC  |
| ENSG00000117114 | CAGCAGA  |
| ENSG00000117114 | CCUGCUG  |
| ENSG00000117114 | GAAGGAA  |
| ENSG00000117114 | GGAAGAC  |
| ENSG00000117114 | GGAUUUU  |
| ENSG00000117114 | GUAACAG  |
| ENSG00000117114 | GUGCAAA  |
| ENSG00000117114 | UACAGUU  |
| ENSG00000117114 | UAUAAAAG |
| ENSG00000117114 | UAUAAUA  |
| ENSG00000117114 | UCAUGAU  |
| ENSG00000117114 | UCCCACA  |
| ENSG00000117114 | UGAGAAG  |
| ENSG00000117114 | UGUAUAA  |
| ENSG00000117114 | UUGGCAC  |
| ENSG00000117115 | AAAAAUC  |
| ENSG00000117115 | AGCUGCC  |
| ENSG00000117115 | CUCCAGC  |
| ENSG00000117115 | CUCUGGG  |
| ENSG00000117115 | CUCUUCC  |
| ENSG00000117115 | GCCUGGA  |
| ENSG00000117115 | GGGGUGG  |
| ENSG00000117115 | UUUGCAA  |
| ENSG00000117115 | UUUGCAC  |
| ENSG00000117122 | AGCACCA  |
| ENSG00000117152 | AAGGUGC  |
| ENSG00000117152 | AGGGUCU  |
| ENSG00000117152 | CUCCAUI  |
| ENSG00000117152 | GAGUCUU  |
| ENSG00000117152 | GCAGCAU  |
| ENSG00000117153 | AAAGUGC  |
| ENSG00000117153 | CCAGUGC  |
| ENSG00000117153 | GUGCCUG  |
| ENSG00000117155 | AAUCUCA  |

|                 |          |
|-----------------|----------|
| ENSG00000117155 | ACAAUUAU |
| ENSG00000117155 | ACACACC  |
| ENSG00000117155 | ACAGUAC  |
| ENSG00000117155 | ACCCUGU  |
| ENSG00000117155 | AGUGCUG  |
| ENSG00000117155 | CAAGAGC  |
| ENSG00000117155 | CCCUGUU  |
| ENSG00000117155 | CUCAAAC  |
| ENSG00000117155 | CUUUGGU  |
| ENSG00000117155 | UACAAAG  |
| ENSG00000117155 | UCACAGG  |
| ENSG00000117155 | UCACAGU  |
| ENSG00000117155 | UUCCUAG  |
| ENSG00000117174 | CAAAACU  |
| ENSG00000117174 | UAGUGAG  |
| ENSG00000117215 | AACCUGU  |
| ENSG00000117222 | AAGUCAC  |
| ENSG00000117222 | CCAGCAU  |
| ENSG00000117222 | GUCCAGA  |
| ENSG00000117222 | UCACAGG  |
| ENSG00000117222 | UCCCUUU  |
| ENSG00000117222 | UCCUUGC  |
| ENSG00000117222 | UGCAUAG  |
| ENSG00000117222 | UGCAUUAU |
| ENSG00000117222 | UCCAUA   |
| ENSG00000117245 | CUCUGGG  |
| ENSG00000117266 | AAGGCAC  |
| ENSG00000117266 | ACAGUAC  |
| ENSG00000117266 | CACAGUG  |
| ENSG00000117266 | GGAGGCA  |
| ENSG00000117266 | UCACAGG  |
| ENSG00000117266 | UCACAGU  |
| ENSG00000117266 | UUGGCAC  |
| ENSG00000117280 | UGAGAAU  |
| ENSG00000117289 | AGCAGCA  |
| ENSG00000117289 | AGUGCAA  |
| ENSG00000117289 | CAAAGUG  |
| ENSG00000117289 | CAGUGCA  |
| ENSG00000117298 | AAGGCAC  |
| ENSG00000117298 | ACAGUAC  |
| ENSG00000117298 | ACAGUAU  |
| ENSG00000117298 | AGGACAC  |
| ENSG00000117298 | AGGUUAU  |
| ENSG00000117298 | AGUGCCG  |
| ENSG00000117298 | AGUGCCU  |
| ENSG00000117298 | AUAAUAC  |
| ENSG00000117298 | CCAGUGC  |
| ENSG00000117298 | CCCUGAG  |
| ENSG00000117298 | CUACAGU  |
| ENSG00000117298 | GUAUUCU  |
| ENSG00000117298 | GUGCCAC  |
| ENSG00000117298 | UAAUACA  |
| ENSG00000117298 | UCACAGG  |
| ENSG00000117298 | UCACAGU  |
| ENSG00000117298 | UCCAGUU  |
| ENSG00000117298 | UCCUGU   |
| ENSG00000117298 | UCCCUUG  |
| ENSG00000117298 | UCCCUUU  |
| ENSG00000117305 | GAGUUGG  |
| ENSG00000117308 | GAGGUAG  |
| ENSG00000117318 | AAAGGUA  |
| ENSG00000117318 | AAGUCAC  |
| ENSG00000117318 | UAUAAAG  |
| ENSG00000117318 | UCACAGU  |

|                 |          |
|-----------------|----------|
| ENSG00000117318 | UCUCCAA  |
| ENSG00000117362 | AAAAACC  |
| ENSG00000117362 | CUUCACC  |
| ENSG00000117362 | UGGAGAU  |
| ENSG00000117385 | AUCCUUG  |
| ENSG00000117385 | CACCAGC  |
| ENSG00000117385 | UCACCAC  |
| ENSG00000117394 | AACAGUC  |
| ENSG00000117394 | AACUGGU  |
| ENSG00000117394 | ACUCCAG  |
| ENSG00000117394 | AGCUGCC  |
| ENSG00000117394 | AGUGCAA  |
| ENSG00000117394 | AUAU AAC |
| ENSG00000117394 | CAGUGCA  |
| ENSG00000117394 | CCAGUGC  |
| ENSG00000117394 | CUAUACA  |
| ENSG00000117394 | CUCAGGG  |
| ENSG00000117394 | GUCUUGC  |
| ENSG00000117394 | UAUAAAG  |
| ENSG00000117394 | UUCUAAU  |
| ENSG00000117395 | UUGGUUC  |
| ENSG00000117408 | CUUUGGU  |
| ENSG00000117410 | UCCAGUU  |
| ENSG00000117411 | CAGUGCA  |
| ENSG00000117411 | GAAAACA  |
| ENSG00000117411 | GGCAGUG  |
| ENSG00000117411 | GUGCAA   |
| ENSG00000117461 | AAAAACC  |
| ENSG00000117461 | AAAGAAU  |
| ENSG00000117461 | AAGUCAC  |
| ENSG00000117461 | AAGUGCU  |
| ENSG00000117461 | AAUCACU  |
| ENSG00000117461 | AGCACCA  |
| ENSG00000117461 | AGGGAGG  |
| ENSG00000117461 | AUGGCUU  |
| ENSG00000117461 | AUGUCUG  |
| ENSG00000117461 | CAGCUGG  |
| ENSG00000117461 | CAGUGCA  |
| ENSG00000117461 | CUCUCC   |
| ENSG00000117461 | CUGCAGG  |
| ENSG00000117461 | CUGUUGA  |
| ENSG00000117461 | CUUUGGU  |
| ENSG00000117461 | GAAACAU  |
| ENSG00000117461 | GCUGGAU  |
| ENSG00000117461 | GCUUCCU  |
| ENSG00000117461 | GGAAGAC  |
| ENSG00000117461 | GGAAUGU  |
| ENSG00000117461 | GGCUCAG  |
| ENSG00000117461 | GUCUGCC  |
| ENSG00000117461 | UACAAAG  |
| ENSG00000117461 | UAUUGCU  |
| ENSG00000117461 | UCAAGUA  |
| ENSG00000117461 | UCACAUU  |
| ENSG00000117461 | UGCAUUG  |
| ENSG00000117461 | UUCUGCA  |
| ENSG00000117461 | UUGGUUC  |
| ENSG00000117472 | GGGAUCG  |
| ENSG00000117472 | UGGGAUC  |
| ENSG00000117479 | AAAACUG  |
| ENSG00000117479 | AAAGAGG  |
| ENSG00000117479 | ACAGUAU  |
| ENSG00000117479 | CUUCUCU  |
| ENSG00000117479 | CUUUGGU  |
| ENSG00000117479 | UAUUGCU  |

|                 |         |
|-----------------|---------|
| ENSG00000117479 | UGGAUAA |
| ENSG00000117481 | AGCAUUC |
| ENSG00000117481 | AUCCCUU |
| ENSG00000117481 | CCUGCUG |
| ENSG00000117481 | CUCCCAA |
| ENSG00000117481 | UACAAAG |
| ENSG00000117481 | UGAGUCU |
| ENSG00000117481 | UUCCUAG |
| ENSG00000117500 | ACAGUAU |
| ENSG00000117500 | AUUGCAC |
| ENSG00000117500 | CACAGUG |
| ENSG00000117500 | CUGGAAA |
| ENSG00000117500 | GAGGUAG |
| ENSG00000117500 | UCACAGU |
| ENSG00000117500 | UCAUGAU |
| ENSG00000117500 | UGCAUUG |
| ENSG00000117500 | UUUCAAC |
| ENSG00000117505 | AAUUUUA |
| ENSG00000117505 | CUUUGGU |
| ENSG00000117519 | AAGGCAC |
| ENSG00000117519 | ACAGUAU |
| ENSG00000117519 | CACAGUG |
| ENSG00000117519 | UAUAAAG |
| ENSG00000117519 | UCACAGG |
| ENSG00000117519 | UUAUGCA |
| ENSG00000117523 | AAUACUG |
| ENSG00000117523 | ACAGUAU |
| ENSG00000117523 | ACCUGGA |
| ENSG00000117523 | ACUAGAU |
| ENSG00000117523 | AGCAGCG |
| ENSG00000117523 | AGCAGCU |
| ENSG00000117523 | AGCUGCC |
| ENSG00000117523 | AGUACUG |
| ENSG00000117523 | AUCAUAC |
| ENSG00000117523 | AUGGCUU |
| ENSG00000117523 | CAGCAGA |
| ENSG00000117523 | CCUGUAC |
| ENSG00000117523 | CUGCAGC |
| ENSG00000117523 | CUGCAGG |
| ENSG00000117523 | GAGGAUA |
| ENSG00000117523 | GUUAAUG |
| ENSG00000117523 | UAGAGGA |
| ENSG00000117523 | UAUAAUA |
| ENSG00000117523 | UCACAGU |
| ENSG00000117523 | UCAUACA |
| ENSG00000117523 | UCUGGAA |
| ENSG00000117523 | UGGUACC |
| ENSG00000117523 | UUCUGCA |
| ENSG00000117525 | AAAGUUU |
| ENSG00000117525 | AAAUCCC |
| ENSG00000117525 | AGUAGUU |
| ENSG00000117525 | CAGUUAC |
| ENSG00000117525 | GUCAGUU |
| ENSG00000117525 | UAUAAAG |
| ENSG00000117525 | UCACAGU |
| ENSG00000117533 | ACUGGAU |
| ENSG00000117533 | AUCCUUG |
| ENSG00000117533 | GCAGCAU |
| ENSG00000117533 | GGCAAGA |
| ENSG00000117533 | UCUCAAG |
| ENSG00000117533 | UCUUGAG |
| ENSG00000117560 | GAGGUAG |
| ENSG00000117560 | GAGGUAU |
| ENSG00000117569 | AAAAACC |

|                 |         |
|-----------------|---------|
| ENSG00000117569 | AAAAGUA |
| ENSG00000117569 | AAAGUAU |
| ENSG00000117569 | AAGACAU |
| ENSG00000117569 | ACACACU |
| ENSG00000117569 | ACAUUAC |
| ENSG00000117569 | AUGCACC |
| ENSG00000117569 | CAGUCUG |
| ENSG00000117569 | CCCACCG |
| ENSG00000117569 | CCCACCU |
| ENSG00000117569 | CUUUGGU |
| ENSG00000117569 | GAGUGUG |
| ENSG00000117569 | UAAGACG |
| ENSG00000117569 | UCCCACC |
| ENSG00000117569 | UUCUAAU |
| ENSG00000117569 | UUGGUCC |
| ENSG00000117586 | UAUUACC |
| ENSG00000117586 | UCUGGAG |
| ENSG00000117597 | AAAGUGC |
| ENSG00000117597 | AAGUGCU |
| ENSG00000117597 | AGCCCUU |
| ENSG00000117597 | CAGCAGA |
| ENSG00000117597 | CAGCAGG |
| ENSG00000117597 | CAGCUGG |
| ENSG00000117597 | GAGCUGC |
| ENSG00000117597 | GAGGAUA |
| ENSG00000117597 | GGCUCAG |
| ENSG00000117597 | GGGUAAG |
| ENSG00000117597 | UUCUUGU |
| ENSG00000117616 | AAGUGCA |
| ENSG00000117616 | CCCACCG |
| ENSG00000117616 | UCCCACC |
| ENSG00000117620 | AGGACAC |
| ENSG00000117620 | GCAGCAU |
| ENSG00000117620 | UCACAGG |
| ENSG00000117620 | UCACAGU |
| ENSG00000117620 | UGCAUAG |
| ENSG00000117625 | AACACUG |
| ENSG00000117625 | AUCCUUU |
| ENSG00000117625 | CAAAGCA |
| ENSG00000117625 | GCUGGUG |
| ENSG00000117625 | UGCAAAG |
| ENSG00000117625 | UUUGCAA |
| ENSG00000117632 | ACUGGCC |
| ENSG00000117640 | AGCAGCA |
| ENSG00000117643 | GAAAACA |
| ENSG00000117676 | AAAGUGC |
| ENSG00000117676 | AAGGCAC |
| ENSG00000117676 | AAGUGCU |
| ENSG00000117676 | CACACCG |
| ENSG00000117676 | CACACCU |
| ENSG00000117676 | CCCUGAG |
| ENSG00000117676 | CUCACAC |
| ENSG00000117676 | GCUGGUG |
| ENSG00000117676 | GUGCCUG |
| ENSG00000117682 | AAAUCCC |
| ENSG00000117682 | AAGGCAC |
| ENSG00000117682 | AAUCACU |
| ENSG00000117682 | AAUCCUU |
| ENSG00000117682 | ACCCUGU |
| ENSG00000117682 | AGCAAAA |
| ENSG00000117682 | AGCAGCA |
| ENSG00000117682 | CAAAGUG |
| ENSG00000117682 | CAGCAGA |
| ENSG00000117682 | CUCCAGC |



|                 |         |
|-----------------|---------|
| ENSG00000117682 | CUUGUGU |
| ENSG00000117682 | GAUUGGU |
| ENSG00000117682 | GAUUGUA |
| ENSG00000117682 | GGAGGAG |
| ENSG00000117682 | GGAGGCA |
| ENSG00000117682 | GGCAGGG |
| ENSG00000117682 | GGCUCUG |
| ENSG00000117682 | GUCAACA |
| ENSG00000117682 | GUGCCAC |
| ENSG00000117682 | GUGUGGC |
| ENSG00000117682 | UCAACAG |
| ENSG00000117682 | UGCCUG  |
| ENSG00000117682 | UGGGGA  |
| ENSG00000117682 | UGUGUGG |
| ENSG00000117697 | AACAAAC |
| ENSG00000117697 | AGUAACA |
| ENSG00000117697 | UGAGAAU |
| ENSG00000117713 | AAAGAGG |
| ENSG00000117713 | AAAGGUA |
| ENSG00000117713 | AAUCUCA |
| ENSG00000117713 | AUAAAGU |
| ENSG00000117713 | CACACCG |
| ENSG00000117713 | CCUGUAC |
| ENSG00000117713 | GAGACCU |
| ENSG00000117713 | GGGUGUU |
| ENSG00000117713 | GGUGGUU |
| ENSG00000117713 | GUAUGUU |
| ENSG00000117748 | AAGUGCA |
| ENSG00000117751 | AAAGGUA |
| ENSG00000117751 | AAAGUUU |
| ENSG00000117751 | ACAGGUG |
| ENSG00000117751 | AUGUAAU |
| ENSG00000117751 | GUUAGGA |
| ENSG00000117751 | UACAAAG |
| ENSG00000117758 | AGCAAAA |
| ENSG00000117758 | AUACAAG |
| ENSG00000117758 | CUCCAUU |
| ENSG00000117758 | GUGCAAA |
| ENSG00000117758 | UACAAAG |
| ENSG00000117758 | UGCAAAG |
| ENSG00000117859 | AAAUUUC |
| ENSG00000117859 | AUCCCUU |
| ENSG00000117859 | CCAGUAC |
| ENSG00000117859 | UUCUAAU |
| ENSG00000117862 | CCUGCUG |
| ENSG00000117899 | GGGCCCC |
| ENSG00000118007 | ACAGUAU |
| ENSG00000118007 | CUCUAGC |
| ENSG00000118007 | GCUGGUG |
| ENSG00000118007 | UCACAGU |
| ENSG00000118046 | AAAGUGC |
| ENSG00000118046 | AAGUGCA |
| ENSG00000118046 | AUAAAGU |
| ENSG00000118046 | CAGUAGU |
| ENSG00000118046 | CUCUGGG |
| ENSG00000118046 | GGAAGAC |
| ENSG00000118046 | UAUUGCU |
| ENSG00000118058 | AACAAAC |
| ENSG00000118058 | AAGGCAC |
| ENSG00000118058 | AAGUGCA |
| ENSG00000118058 | AAUUUUU |
| ENSG00000118058 | ACUGGCC |
| ENSG00000118058 | AGUAACA |
| ENSG00000118058 | AGUGCAA |

|                 |         |
|-----------------|---------|
| ENSG00000118058 | AGUGCUG |
| ENSG00000118058 | AUAAUAC |
| ENSG00000118058 | CAAUUGC |
| ENSG00000118058 | CACAGUG |
| ENSG00000118058 | CAGGCUC |
| ENSG00000118058 | CAGUAGU |
| ENSG00000118058 | CUAGUCC |
| ENSG00000118058 | CUCACAC |
| ENSG00000118058 | GACUUCC |
| ENSG00000118058 | GGGGGAA |
| ENSG00000118058 | GGUCUAG |
| ENSG00000118058 | GUAGUGU |
| ENSG00000118058 | GUCAACA |
| ENSG00000118058 | GUUCAUG |
| ENSG00000118058 | UAUAAAG |
| ENSG00000118058 | UAUUGCU |
| ENSG00000118058 | UCACACA |
| ENSG00000118058 | UCAUAGA |
| ENSG00000118058 | UCCUAUA |
| ENSG00000118058 | UCUCAAG |
| ENSG00000118058 | UGAAGUG |
| ENSG00000118058 | UGGCCAC |
| ENSG00000118058 | UGUGCUU |
| ENSG00000118058 | UUAGGAU |
| ENSG00000118058 | UUGACAC |
| ENSG00000118160 | AAAGUUU |
| ENSG00000118160 | ACACACU |
| ENSG00000118160 | AGAUGUG |
| ENSG00000118160 | AGGUAGU |
| ENSG00000118160 | AUGCACC |
| ENSG00000118160 | AUGGCAC |
| ENSG00000118160 | CCCUGAG |
| ENSG00000118160 | CUCUGGG |
| ENSG00000118160 | GAGGUAG |
| ENSG00000118160 | GCAACUU |
| ENSG00000118160 | GCAGCAU |
| ENSG00000118160 | GGAAUGU |
| ENSG00000118160 | GGCAGCG |
| ENSG00000118160 | UCAACAG |
| ENSG00000118160 | UUGGUCC |
| ENSG00000118193 | AGUGCCU |
| ENSG00000118193 | UUCAAAU |
| ENSG00000118200 | AGCAGCU |
| ENSG00000118200 | AGUGCUU |
| ENSG00000118200 | GAGUUGG |
| ENSG00000118200 | UCCUGAG |
| ENSG00000118200 | UGAAGUG |
| ENSG00000118217 | AACACUG |
| ENSG00000118242 | AAGUCUU |
| ENSG00000118242 | UCAAGUA |
| ENSG00000118242 | UCCUGAG |
| ENSG00000118242 | UUCAAGC |
| ENSG00000118242 | UUUCAAC |
| ENSG00000118245 | ACAUUCA |
| ENSG00000118245 | GAGAUGA |
| ENSG00000118257 | AAAUGGU |
| ENSG00000118257 | CACAGUG |
| ENSG00000118260 | AAGUGCA |
| ENSG00000118260 | ACAUUCA |
| ENSG00000118260 | GGAGGCA |
| ENSG00000118267 | AAAUGGU |
| ENSG00000118267 | UUCUGCA |
| ENSG00000118267 | UUGUUCG |
| ENSG00000118276 | AAAGCUG |

|                 |         |
|-----------------|---------|
| ENSG00000118276 | AAAGUGC |
| ENSG00000118276 | AAAUCCC |
| ENSG00000118276 | AAGUGCU |
| ENSG00000118276 | AUGCAUU |
| ENSG00000118276 | CCUGAG  |
| ENSG00000118276 | GGCUCUG |
| ENSG00000118322 | UAAGACU |
| ENSG00000118322 | UCACAGU |
| ENSG00000118363 | AAAGCUG |
| ENSG00000118363 | AAAUUUC |
| ENSG00000118363 | ACAUUC  |
| ENSG00000118363 | AAGUUGU |
| ENSG00000118363 | ACACACU |
| ENSG00000118363 | ACUUGGA |
| ENSG00000118363 | AGUACUG |
| ENSG00000118363 | CAGCAGG |
| ENSG00000118363 | GAAAACA |
| ENSG00000118363 | GGCAGUG |
| ENSG00000118363 | UAUAAAG |
| ENSG00000118363 | UCAACAG |
| ENSG00000118363 | UCACAUU |
| ENSG00000118363 | UCAUACA |
| ENSG00000118369 | AGGACAC |
| ENSG00000118369 | AGGCAGG |
| ENSG00000118369 | GAGGCAG |
| ENSG00000118402 | GAGGUAG |
| ENSG00000118407 | UCAUUUG |
| ENSG00000118412 | AUACAAG |
| ENSG00000118412 | CAGCAA  |
| ENSG00000118418 | AGCACCA |
| ENSG00000118418 | UACAAAG |
| ENSG00000118420 | UGCUGAC |
| ENSG00000118432 | AAAGAGC |
| ENSG00000118432 | AAAGAGG |
| ENSG00000118432 | AAAGUAU |
| ENSG00000118432 | AACCUGG |
| ENSG00000118432 | AAUUUUA |
| ENSG00000118432 | ACAUUCA |
| ENSG00000118432 | ACCAGCA |
| ENSG00000118432 | AGCACCA |
| ENSG00000118432 | AGUGCAA |
| ENSG00000118432 | AGUGCUG |
| ENSG00000118432 | AGUGCUU |
| ENSG00000118432 | AUUGCAC |
| ENSG00000118432 | CACAGUG |
| ENSG00000118432 | CAGUGCA |
| ENSG00000118432 | CCAGUGC |
| ENSG00000118432 | GAGAAAU |
| ENSG00000118432 | GUCCAGA |
| ENSG00000118432 | UCACACA |
| ENSG00000118432 | UCACAGU |
| ENSG00000118432 | UGAAGCU |
| ENSG00000118432 | UGGCCAC |
| ENSG00000118454 | AAGGCAC |
| ENSG00000118454 | AAUGUUG |
| ENSG00000118454 | ACAUAGA |
| ENSG00000118454 | AGUGCUG |
| ENSG00000118454 | CAGUAGU |
| ENSG00000118454 | CCAGUGU |
| ENSG00000118454 | CUACAGU |
| ENSG00000118454 | CUAUACA |
| ENSG00000118454 | GAAUUGU |
| ENSG00000118454 | GAUCAGA |
| ENSG00000118454 | GCAUCCC |

|                 |          |
|-----------------|----------|
| ENSG00000118454 | GGAAUGU  |
| ENSG00000118454 | GGACCUG  |
| ENSG00000118454 | GGAGUGU  |
| ENSG00000118454 | GUCAACA  |
| ENSG00000118454 | GUUAAUG  |
| ENSG00000118454 | UAAGACG  |
| ENSG00000118454 | UAAGACU  |
| ENSG00000118454 | UAUAAAAG |
| ENSG00000118454 | UAUAUGA  |
| ENSG00000118454 | UCAACAG  |
| ENSG00000118454 | UCAUUCG  |
| ENSG00000118454 | UCCUGU   |
| ENSG00000118454 | UCCCUUG  |
| ENSG00000118454 | UGAAAUG  |
| ENSG00000118454 | UGGAUAA  |
| ENSG00000118473 | AAGUGCA  |
| ENSG00000118473 | AAUACUG  |
| ENSG00000118473 | AAUCCUU  |
| ENSG00000118473 | AUCCUUG  |
| ENSG00000118473 | CAGGAAC  |
| ENSG00000118473 | CCUGUU   |
| ENSG00000118473 | CCUUCUG  |
| ENSG00000118473 | GGAAUGU  |
| ENSG00000118473 | GUGCCAC  |
| ENSG00000118482 | ACAGUAC  |
| ENSG00000118482 | ACAGUAU  |
| ENSG00000118482 | AUUGCAC  |
| ENSG00000118482 | UAUUGCU  |
| ENSG00000118495 | AAAAAUC  |
| ENSG00000118495 | AAAUCCC  |
| ENSG00000118495 | AGAUAAA  |
| ENSG00000118495 | AGCAGCA  |
| ENSG00000118495 | AGCAGCG  |
| ENSG00000118495 | AUGGCUU  |
| ENSG00000118495 | CCCUGAG  |
| ENSG00000118495 | UCACAUU  |
| ENSG00000118496 | AAGGCAC  |
| ENSG00000118496 | ACCCUGU  |
| ENSG00000118496 | AGCCCUU  |
| ENSG00000118496 | CCAGCAU  |
| ENSG00000118496 | CCCUGUC  |
| ENSG00000118496 | GCAACUU  |
| ENSG00000118496 | GUCACUC  |
| ENSG00000118496 | GUCCAGA  |
| ENSG00000118496 | GUGCUUG  |
| ENSG00000118503 | AAGGUGC  |
| ENSG00000118503 | AGCAGCU  |
| ENSG00000118503 | AGGUUAU  |
| ENSG00000118503 | CAGCAGA  |
| ENSG00000118503 | CAGCAGG  |
| ENSG00000118503 | CCCUGAG  |
| ENSG00000118503 | GAGGUAG  |
| ENSG00000118503 | GCACCAU  |
| ENSG00000118503 | UCAUACA  |
| ENSG00000118507 | ACUGCAU  |
| ENSG00000118507 | AGUGCAA  |
| ENSG00000118507 | UGCAAAG  |
| ENSG00000118507 | UGCAUAG  |
| ENSG00000118513 | AGCAGCG  |
| ENSG00000118513 | AGCAGCU  |
| ENSG00000118513 | CAGCAAA  |
| ENSG00000118513 | GGCAUUG  |
| ENSG00000118513 | UGCAUAG  |
| ENSG00000118513 | UUGGCAA  |

|                 |         |
|-----------------|---------|
| ENSG00000118513 | UUGGCAC |
| ENSG00000118514 | AAAAGUA |
| ENSG00000118514 | AACAUUC |
| ENSG00000118515 | AAAAAUC |
| ENSG00000118515 | AAGGCAC |
| ENSG00000118515 | AGCAGCG |
| ENSG00000118515 | AGCAGCU |
| ENSG00000118515 | AUUGCAC |
| ENSG00000118515 | CAGCUGG |
| ENSG00000118515 | GGAAGAC |
| ENSG00000118515 | GGGGCAG |
| ENSG00000118515 | GUGUCAC |
| ENSG00000118515 | UAUUGCU |
| ENSG00000118515 | UCACAUU |
| ENSG00000118515 | UGCAAAG |
| ENSG00000118515 | UUCUAAU |
| ENSG00000118515 | UUGGUCC |
| ENSG00000118518 | AAAACUG |
| ENSG00000118518 | UCCCACC |
| ENSG00000118523 | AAGGUGC |
| ENSG00000118523 | AGAUAAA |
| ENSG00000118523 | GUCCAGA |
| ENSG00000118523 | GUGCAAA |
| ENSG00000118523 | UCAAGUA |
| ENSG00000118523 | UUGGUCC |
| ENSG00000118526 | AAAACUG |
| ENSG00000118526 | GAGAACU |
| ENSG00000118564 | AAGUCAC |
| ENSG00000118564 | AGCCUGC |
| ENSG00000118564 | AGUAGAC |
| ENSG00000118564 | CUGCUCA |
| ENSG00000118640 | AGCAGCA |
| ENSG00000118640 | GCAGCAU |
| ENSG00000118655 | CAGCUGG |
| ENSG00000118655 | CUGGCUC |
| ENSG00000118655 | GCAGAAG |
| ENSG00000118655 | GCUUCCU |
| ENSG00000118655 | GGCUCUG |
| ENSG00000118655 | UUGGCAA |
| ENSG00000118655 | UUGGCAC |
| ENSG00000118689 | AAAGCUG |
| ENSG00000118689 | ACUAGAU |
| ENSG00000118689 | ACUGUAG |
| ENSG00000118689 | AGCACCA |
| ENSG00000118689 | AGGAGCU |
| ENSG00000118689 | AUCACUA |
| ENSG00000118689 | CACUGUU |
| ENSG00000118689 | CCUGCUG |
| ENSG00000118689 | CUAUACA |
| ENSG00000118689 | CUUCACC |
| ENSG00000118689 | CUUUGGU |
| ENSG00000118689 | GAGAAAU |
| ENSG00000118689 | GAGUGUG |
| ENSG00000118689 | GCACCAU |
| ENSG00000118689 | GCUACAU |
| ENSG00000118689 | GGAGUGU |
| ENSG00000118689 | GGCAGGG |
| ENSG00000118689 | GUAAACA |
| ENSG00000118689 | GUCUCUG |
| ENSG00000118689 | GUGCCAC |
| ENSG00000118689 | GUGUGGC |
| ENSG00000118689 | UACAAAG |
| ENSG00000118689 | UAUAUGA |
| ENSG00000118689 | UCACAAG |

|                 |         |
|-----------------|---------|
| ENSG00000118689 | UCUGGAA |
| ENSG00000118689 | UCUGGAG |
| ENSG00000118689 | UGCAUAG |
| ENSG00000118689 | UGCUGAC |
| ENSG00000118689 | UGGAGAU |
| ENSG00000118689 | UUAUGCA |
| ENSG00000118689 | UUCCAUA |
| ENSG00000118689 | UUGAGGC |
| ENSG00000118689 | UUGGAGG |
| ENSG00000118689 | UUGGCAC |
| ENSG00000118689 | UUGUGUC |
| ENSG00000118689 | UUUGCAA |
| ENSG00000118689 | UUUGCAC |
| ENSG00000118702 | AAUUUUA |
| ENSG00000118705 | UCACAGG |
| ENSG00000118705 | UCACAGU |
| ENSG00000118705 | UCUGGAA |
| ENSG00000118707 | AACAUUC |
| ENSG00000118707 | ACAGUAC |
| ENSG00000118707 | ACAGUAU |
| ENSG00000118707 | ACCACAG |
| ENSG00000118707 | ACUUGGA |
| ENSG00000118707 | AGCACCA |
| ENSG00000118707 | AGUGAUC |
| ENSG00000118707 | CACAGUG |
| ENSG00000118707 | CAGCAGG |
| ENSG00000118707 | CAGCUGG |
| ENSG00000118707 | CUGCAGG |
| ENSG00000118707 | GCACCAU |
| ENSG00000118707 | GCAGCAU |
| ENSG00000118707 | GCCUGGA |
| ENSG00000118707 | GGAAUGU |
| ENSG00000118707 | GGAGUCC |
| ENSG00000118707 | UACAGUU |
| ENSG00000118707 | UCCUGAG |
| ENSG00000118707 | UGAUCCA |
| ENSG00000118707 | UGCUCAC |
| ENSG00000118707 | UGUGCUU |
| ENSG00000118707 | UUGACAC |
| ENSG00000118729 | AAGGCAC |
| ENSG00000118729 | GGCUCUG |
| ENSG00000118733 | AAGACAU |
| ENSG00000118733 | AAGGCAC |
| ENSG00000118733 | AGUGCUG |
| ENSG00000118733 | CACAAUG |
| ENSG00000118733 | GGUAGAC |
| ENSG00000118733 | GGUGGUC |
| ENSG00000118733 | GGUUACC |
| ENSG00000118733 | GUCUCUG |
| ENSG00000118733 | UAUAAAG |
| ENSG00000118733 | UCACAGG |
| ENSG00000118733 | UCACAGU |
| ENSG00000118762 | CAUGGAU |
| ENSG00000118762 | GACCAUG |
| ENSG00000118762 | UGAAGUG |
| ENSG00000118804 | AGCAAAA |
| ENSG00000118873 | UACAAAG |
| ENSG00000118900 | AAAACUG |
| ENSG00000118900 | AAGGCAC |
| ENSG00000118900 | AAUCUCU |
| ENSG00000118900 | AUCACUA |
| ENSG00000118900 | AUGCAUU |
| ENSG00000118900 | AUGUCUG |
| ENSG00000118900 | CACCACC |

|                 |         |
|-----------------|---------|
| ENSG00000118900 | CUACAAA |
| ENSG00000118900 | CUCCAGC |
| ENSG00000118900 | CUGCUC  |
| ENSG00000118900 | CUUUGGU |
| ENSG00000118900 | GAAACAU |
| ENSG00000118900 | GAGGCAG |
| ENSG00000118900 | GGAAUGU |
| ENSG00000118900 | GGCAAGA |
| ENSG00000118900 | GUGCAAA |
| ENSG00000118900 | UAAGACU |
| ENSG00000118900 | UCCUGU  |
| ENSG00000118922 | AAAAGUA |
| ENSG00000118922 | AAACUGU |
| ENSG00000118922 | AAAGAGC |
| ENSG00000118922 | AAAGUAU |
| ENSG00000118922 | AACUCUA |
| ENSG00000118922 | AAGUGCA |
| ENSG00000118922 | AAUACUG |
| ENSG00000118922 | AAUUGCU |
| ENSG00000118922 | AAUUUUA |
| ENSG00000118922 | ACAAUAU |
| ENSG00000118922 | ACACACC |
| ENSG00000118922 | ACAUUAC |
| ENSG00000118922 | ACGCUCA |
| ENSG00000118922 | ACUGCAU |
| ENSG00000118922 | AGCACCA |
| ENSG00000118922 | AGCCCUU |
| ENSG00000118922 | AGGGUCU |
| ENSG00000118922 | AGUAGUU |
| ENSG00000118922 | AUAUAAC |
| ENSG00000118922 | AUCAUAC |
| ENSG00000118922 | AUGCACC |
| ENSG00000118922 | AUGCCUU |
| ENSG00000118922 | CAAGAGC |
| ENSG00000118922 | CAGACAG |
| ENSG00000118922 | CAGCUGG |
| ENSG00000118922 | CAGGCUC |
| ENSG00000118922 | CAGUAGU |
| ENSG00000118922 | CAGUCUG |
| ENSG00000118922 | CCAGUGC |
| ENSG00000118922 | CCAGUGU |
| ENSG00000118922 | CCAUUAC |
| ENSG00000118922 | CUACAAA |
| ENSG00000118922 | CUAUACA |
| ENSG00000118922 | CUGCCC  |
| ENSG00000118922 | CUUUGGU |
| ENSG00000118922 | GAGUAUU |
| ENSG00000118922 | GCACCAU |
| ENSG00000118922 | GCCUGGG |
| ENSG00000118922 | GGCAGGG |
| ENSG00000118922 | GGGUGUU |
| ENSG00000118922 | GGUGGUC |
| ENSG00000118922 | GGUUACC |
| ENSG00000118922 | GUCUUGC |
| ENSG00000118922 | GUGACAG |
| ENSG00000118922 | GUGAGGU |
| ENSG00000118922 | GUGCAAA |
| ENSG00000118922 | GUGCUUG |
| ENSG00000118922 | GUUCAUG |
| ENSG00000118922 | UCACAGG |
| ENSG00000118922 | UCACAGU |
| ENSG00000118922 | UCAUAGA |
| ENSG00000118922 | UCAUUCG |
| ENSG00000118922 | UCCACA  |

|                 |          |
|-----------------|----------|
| ENSG00000118922 | UCCUUGC  |
| ENSG00000118922 | UGAAGUG  |
| ENSG00000118922 | UGAGAAU  |
| ENSG00000118922 | UGGCCAC  |
| ENSG00000118922 | UUGACAC  |
| ENSG00000118922 | UUGUUCG  |
| ENSG00000118946 | AAGACAU  |
| ENSG00000118946 | ACUCAA   |
| ENSG00000118946 | ACUGUAG  |
| ENSG00000118946 | AGCAGCA  |
| ENSG00000118946 | AUAUUAU  |
| ENSG00000118946 | AUGCACC  |
| ENSG00000118946 | CUCAAAC  |
| ENSG00000118946 | GAUUGUC  |
| ENSG00000118946 | GCAGCAU  |
| ENSG00000118946 | GCUUCCU  |
| ENSG00000118946 | GGCUCAG  |
| ENSG00000118946 | GUCAUUG  |
| ENSG00000118946 | UCAUAGA  |
| ENSG00000118946 | UCCACA   |
| ENSG00000118960 | AAGGCAC  |
| ENSG00000118971 | AAACUGU  |
| ENSG00000118971 | AAAGAAU  |
| ENSG00000118971 | AAAGCUG  |
| ENSG00000118971 | AAAGUGC  |
| ENSG00000118971 | AAAUGGU  |
| ENSG00000118971 | AAGUGCU  |
| ENSG00000118971 | AAUUGCU  |
| ENSG00000118971 | ACAUUAC  |
| ENSG00000118971 | ACCAGCA  |
| ENSG00000118971 | AGUGCUU  |
| ENSG00000118971 | CAAAGUG  |
| ENSG00000118971 | CACACCU  |
| ENSG00000118971 | CACCAGC  |
| ENSG00000118971 | CCAGUAC  |
| ENSG00000118971 | CCCUGUU  |
| ENSG00000118971 | GAAACAU  |
| ENSG00000118971 | GAGGAUA  |
| ENSG00000118971 | GAGGUAG  |
| ENSG00000118971 | GAUCAGA  |
| ENSG00000118971 | GCACCAU  |
| ENSG00000118971 | GCCCUGU  |
| ENSG00000118971 | GGUUUAC  |
| ENSG00000118971 | GUCCAGA  |
| ENSG00000118971 | GUGAGGU  |
| ENSG00000118971 | UAUAAAG  |
| ENSG00000118971 | UCAAGUA  |
| ENSG00000118971 | UCCAGUU  |
| ENSG00000118971 | UGCAUAG  |
| ENSG00000118971 | UGCAUAU  |
| ENSG00000118971 | UGGACUG  |
| ENSG00000118971 | UUGGCAA  |
| ENSG00000118971 | UUGGCAC  |
| ENSG00000118972 | CAA AUGC |
| ENSG00000118972 | UAUAAAG  |
| ENSG00000118985 | AACACUG  |
| ENSG00000118985 | AACCUGG  |
| ENSG00000118985 | AACCUGU  |
| ENSG00000118985 | AAGACAU  |
| ENSG00000118985 | AAGGCAC  |
| ENSG00000118985 | AAGUAGC  |
| ENSG00000118985 | AAGUCUU  |
| ENSG00000118985 | ACAGUAU  |
| ENSG00000118985 | AGCACCA  |



|                 |          |
|-----------------|----------|
| ENSG00000118985 | AGCAGCA  |
| ENSG00000118985 | AGCAGCG  |
| ENSG00000118985 | AUAU AAC |
| ENSG00000118985 | CAAAACU  |
| ENSG00000118985 | CACAGUG  |
| ENSG00000118985 | CUACAGU  |
| ENSG00000118985 | CUCU UCC |
| ENSG00000118985 | GAUUGUA  |
| ENSG00000118985 | GCUUCCU  |
| ENSG00000118985 | GGCAGCG  |
| ENSG00000118985 | GGUUUAC  |
| ENSG00000118985 | GUCAGUU  |
| ENSG00000118985 | UAAUGCU  |
| ENSG00000118985 | UCACAGU  |
| ENSG00000118985 | UCACAUU  |
| ENSG00000118985 | UCCCACA  |
| ENSG00000118985 | UCCCACC  |
| ENSG00000118985 | UCCCUUG  |
| ENSG00000118985 | UGCAUAG  |
| ENSG00000118985 | UGCAU AU |
| ENSG00000118985 | UGCAUUG  |
| ENSG00000118985 | UGUCUUU  |
| ENSG00000118985 | UGUGCUU  |
| ENSG00000118985 | UUGGCAA  |
| ENSG00000118985 | UUGGCAC  |
| ENSG00000118985 | UUUGCAA  |
| ENSG00000119004 | UAUAAA G |
| ENSG00000119042 | AAAGCUG  |
| ENSG00000119042 | AAUGCCC  |
| ENSG00000119042 | ACCACAG  |
| ENSG00000119042 | AGCAGCU  |
| ENSG00000119042 | CACAGUG  |
| ENSG00000119042 | CUGCAGC  |
| ENSG00000119042 | UCACAGG  |
| ENSG00000119042 | UCCCUGU  |
| ENSG00000119042 | UCCCUUU  |
| ENSG00000119042 | UGCAGCU  |
| ENSG00000119042 | UGCCCU G |
| ENSG00000119042 | UUUGCAA  |
| ENSG00000119048 | AACCUGU  |
| ENSG00000119048 | AAGGCAC  |
| ENSG00000119048 | AAGUGCA  |
| ENSG00000119048 | ACAUUAC  |
| ENSG00000119048 | AUAU AAC |
| ENSG00000119048 | AUAUU AU |
| ENSG00000119048 | AUGAUGA  |
| ENSG00000119048 | AUGUAAU  |
| ENSG00000119048 | CACACCG  |
| ENSG00000119048 | CACACCU  |
| ENSG00000119048 | CAGCAGG  |
| ENSG00000119048 | CUGCUCA  |
| ENSG00000119048 | GAAAACA  |
| ENSG00000119048 | UACAGUU  |
| ENSG00000119048 | UCACACA  |
| ENSG00000119048 | UUCCAUA  |
| ENSG00000119121 | GAGAAAU  |
| ENSG00000119121 | GAGGUAG  |
| ENSG00000119121 | GAGGU AU |
| ENSG00000119121 | GUGCAAA  |
| ENSG00000119121 | UCAAGUA  |
| ENSG00000119121 | UUCAAGC  |
| ENSG00000119125 | GUAAACA  |
| ENSG00000119125 | UUAUGCA  |
| ENSG00000119138 | AGCAAAA  |

|                 |         |
|-----------------|---------|
| ENSG00000119138 | CAGCAA  |
| ENSG00000119138 | GAGGUAG |
| ENSG00000119138 | UCCUGAG |
| ENSG00000119139 | AAGGCAC |
| ENSG00000119139 | AUGGCUU |
| ENSG00000119227 | CACAGUG |
| ENSG00000119231 | AAAGCUG |
| ENSG00000119231 | AAAGUGC |
| ENSG00000119231 | AAGACAU |
| ENSG00000119231 | AAGUGUG |
| ENSG00000119231 | AAUACUG |
| ENSG00000119231 | ACUGCAU |
| ENSG00000119231 | AGCAGCA |
| ENSG00000119231 | AGCAGCG |
| ENSG00000119231 | AGCAGCU |
| ENSG00000119231 | AGUAACA |
| ENSG00000119231 | AGUGCCU |
| ENSG00000119231 | AGUGCUG |
| ENSG00000119231 | AUAAAGU |
| ENSG00000119231 | CCAGGAG |
| ENSG00000119231 | CCUGCUG |
| ENSG00000119231 | CUGCUCA |
| ENSG00000119231 | CUGGGCA |
| ENSG00000119231 | GAGAAAU |
| ENSG00000119231 | GAGGUAG |
| ENSG00000119231 | GAGGUAU |
| ENSG00000119231 | GCACCAU |
| ENSG00000119231 | GGCAGCG |
| ENSG00000119231 | GUAAACA |
| ENSG00000119231 | GUAACAG |
| ENSG00000119231 | GUAUUCU |
| ENSG00000119231 | GUGGCC  |
| ENSG00000119231 | UCAUUUG |
| ENSG00000119231 | UGUUGAA |
| ENSG00000119231 | UUGAGGC |
| ENSG00000119231 | UUGGAGG |
| ENSG00000119242 | AUAAAGU |
| ENSG00000119242 | CACAGUG |
| ENSG00000119242 | UCACAGU |
| ENSG00000119242 | UUGGCAA |
| ENSG00000119242 | UUGGCAC |
| ENSG00000119280 | CAGGUGA |
| ENSG00000119280 | CUGGGCA |
| ENSG00000119280 | GCAACUU |
| ENSG00000119280 | UCUGGAA |
| ENSG00000119280 | UUGGCAA |
| ENSG00000119280 | UUGGCAC |
| ENSG00000119283 | AAAAAUC |
| ENSG00000119283 | AAAACUG |
| ENSG00000119283 | AAGAACC |
| ENSG00000119283 | ACAUCAC |
| ENSG00000119283 | ACCAUUC |
| ENSG00000119283 | AGCUGCC |
| ENSG00000119283 | AGGAGCU |
| ENSG00000119283 | CAGUUAC |
| ENSG00000119283 | GAGCUGC |
| ENSG00000119283 | GAGGCAG |
| ENSG00000119283 | GAGGUAG |
| ENSG00000119283 | GAGGUAU |
| ENSG00000119283 | GGAAGAC |
| ENSG00000119283 | GUGGGGA |
| ENSG00000119283 | UAAGACG |
| ENSG00000119283 | UAUUGCU |
| ENSG00000119283 | UCAUGAU |

|                 |         |
|-----------------|---------|
| ENSG00000119283 | UCCUGAG |
| ENSG00000119283 | UGCUCAC |
| ENSG00000119283 | UGCUGAC |
| ENSG00000119283 | UUUGCAA |
| ENSG00000119314 | AAAGCUG |
| ENSG00000119314 | ACAGUAU |
| ENSG00000119314 | AGCACCA |
| ENSG00000119314 | AGUGGUU |
| ENSG00000119314 | CUUUGGU |
| ENSG00000119314 | GAGAUGA |
| ENSG00000119314 | GUAAACA |
| ENSG00000119314 | UUGGUCC |
| ENSG00000119318 | AAAGCUG |
| ENSG00000119318 | AAAGUGC |
| ENSG00000119318 | AAGUGCU |
| ENSG00000119318 | ACAUCAC |
| ENSG00000119318 | ACAUUCA |
| ENSG00000119318 | ACUGCAG |
| ENSG00000119318 | ACUGCAU |
| ENSG00000119318 | ACUGUGU |
| ENSG00000119318 | AGCAGCA |
| ENSG00000119318 | AGGUAGU |
| ENSG00000119318 | AUCCCUU |
| ENSG00000119318 | AUGAGCU |
| ENSG00000119318 | CCAGUGC |
| ENSG00000119318 | CUAGUAA |
| ENSG00000119318 | CUAGUAG |
| ENSG00000119318 | CUCACAC |
| ENSG00000119318 | CUCCAUI |
| ENSG00000119318 | GAGCCCC |
| ENSG00000119318 | GAGCCCU |
| ENSG00000119318 | GAUUGUC |
| ENSG00000119318 | GGCAUUG |
| ENSG00000119318 | UAAUAUC |
| ENSG00000119318 | UCACAAG |
| ENSG00000119318 | UCUGGAA |
| ENSG00000119318 | UCUGGAG |
| ENSG00000119318 | UGAAGUG |
| ENSG00000119318 | UGGCCCU |
| ENSG00000119318 | UGUGUGG |
| ENSG00000119318 | UUGGCAA |
| ENSG00000119318 | UUGGCAC |
| ENSG00000119318 | UUGGUUC |
| ENSG00000119321 | AAGGCAC |
| ENSG00000119321 | CUUCACC |
| ENSG00000119335 | AACAAAC |
| ENSG00000119335 | AAUGCCC |
| ENSG00000119335 | ACAUAGA |
| ENSG00000119335 | AGGAUGU |
| ENSG00000119335 | AGUAGAC |
| ENSG00000119335 | AUGCACC |
| ENSG00000119335 | CAAAGCA |
| ENSG00000119335 | CACAGGG |
| ENSG00000119335 | CUCAAAC |
| ENSG00000119335 | GGCAGGG |
| ENSG00000119335 | GUAACAG |
| ENSG00000119335 | UGCUGAC |
| ENSG00000119335 | UUGUGUC |
| ENSG00000119383 | CUGGAAA |
| ENSG00000119383 | CUUUGGU |
| ENSG00000119383 | GUGCAAA |
| ENSG00000119383 | GUGCUUG |
| ENSG00000119383 | UGUGCUU |
| ENSG00000119383 | UUGGUCC |

|                 |          |
|-----------------|----------|
| ENSG00000119392 | GCUGUCU  |
| ENSG00000119396 | AACCUUGG |
| ENSG00000119396 | AACCUGU  |
| ENSG00000119396 | AAGGCAC  |
| ENSG00000119396 | ACAGGUG  |
| ENSG00000119396 | AGCAUUC  |
| ENSG00000119396 | AUUGCAC  |
| ENSG00000119396 | CAGACAG  |
| ENSG00000119396 | CAGCAGA  |
| ENSG00000119396 | GCAGGAC  |
| ENSG00000119396 | UACAAAG  |
| ENSG00000119396 | UCACAGG  |
| ENSG00000119396 | UCACAGU  |
| ENSG00000119396 | UCCAGUU  |
| ENSG00000119396 | UCCUGU   |
| ENSG00000119396 | UGAAAGG  |
| ENSG00000119397 | AGGUAGU  |
| ENSG00000119397 | GAGGUAU  |
| ENSG00000119397 | GUGAGGU  |
| ENSG00000119402 | AGCACCA  |
| ENSG00000119402 | CACCAGC  |
| ENSG00000119402 | CAGCAGA  |
| ENSG00000119402 | CCCCUGG  |
| ENSG00000119402 | CUUUGGU  |
| ENSG00000119402 | GAGAACC  |
| ENSG00000119402 | GAUUGUA  |
| ENSG00000119402 | GAUUGUC  |
| ENSG00000119402 | GCAUCC   |
| ENSG00000119402 | GGUGGUC  |
| ENSG00000119402 | GUAUGUU  |
| ENSG00000119402 | GUUCAUG  |
| ENSG00000119402 | UCUCAAG  |
| ENSG00000119402 | UGAAGCU  |
| ENSG00000119402 | UCCUAG   |
| ENSG00000119402 | UUUGCAC  |
| ENSG00000119403 | AACAAAC  |
| ENSG00000119403 | AAUUAUU  |
| ENSG00000119403 | AGCAGCU  |
| ENSG00000119403 | AGGCAGG  |
| ENSG00000119403 | CCUUCUG  |
| ENSG00000119403 | CUUUGGU  |
| ENSG00000119403 | GAUUGUC  |
| ENSG00000119403 | GCCUGGG  |
| ENSG00000119403 | GGAGUGU  |
| ENSG00000119403 | GGCAGUG  |
| ENSG00000119403 | UCACAUU  |
| ENSG00000119403 | UCCACA   |
| ENSG00000119403 | UGAAAUG  |
| ENSG00000119403 | UUCUAAU  |
| ENSG00000119403 | UUGGUUC  |
| ENSG00000119408 | AAUCCUU  |
| ENSG00000119408 | CACAGUG  |
| ENSG00000119408 | CCUUCAU  |
| ENSG00000119408 | CUUCACC  |
| ENSG00000119408 | UCAAGUA  |
| ENSG00000119408 | UCACAGG  |
| ENSG00000119408 | UCCCUUU  |
| ENSG00000119411 | ACCUUGA  |
| ENSG00000119414 | AAAGUGC  |
| ENSG00000119414 | AAGUGCU  |
| ENSG00000119414 | AGCAGCA  |
| ENSG00000119414 | CAAAGUG  |
| ENSG00000119414 | CAGCAA   |
| ENSG00000119414 | CAGCAGA  |

|                 |          |
|-----------------|----------|
| ENSG00000119414 | CAGCAGG  |
| ENSG00000119414 | GGCAAGA  |
| ENSG00000119421 | AAGUCAC  |
| ENSG00000119446 | AAAGUAC  |
| ENSG00000119457 | AAGUGCU  |
| ENSG00000119457 | AGUGCUU  |
| ENSG00000119471 | AUCCUUG  |
| ENSG00000119471 | AUCCUUU  |
| ENSG00000119471 | UCAAGUA  |
| ENSG00000119471 | UGCAUAU  |
| ENSG00000119471 | UUCAAGC  |
| ENSG00000119487 | AAAAAUC  |
| ENSG00000119487 | AAAGAAU  |
| ENSG00000119487 | AAAGAGC  |
| ENSG00000119487 | AAAGAGG  |
| ENSG00000119487 | CUACAAA  |
| ENSG00000119508 | AAGUCAC  |
| ENSG00000119508 | AUUCAUU  |
| ENSG00000119508 | AUUGCAC  |
| ENSG00000119508 | GGAAUGU  |
| ENSG00000119508 | UAAUAUC  |
| ENSG00000119508 | UAGAGGA  |
| ENSG00000119509 | CAGUGCA  |
| ENSG00000119514 | AAGGCAC  |
| ENSG00000119522 | AAAUGGU  |
| ENSG00000119522 | CUUUGGU  |
| ENSG00000119522 | GCUGGUG  |
| ENSG00000119522 | GGUUUAC  |
| ENSG00000119522 | GUGCAAA  |
| ENSG00000119522 | UAUUGCU  |
| ENSG00000119522 | UUCAAGC  |
| ENSG00000119537 | AGCAGCG  |
| ENSG00000119537 | AGCAGCU  |
| ENSG00000119537 | AUCCUUU  |
| ENSG00000119537 | UGCAUAU  |
| ENSG00000119537 | UGGGAUC  |
| ENSG00000119541 | AAGGCAC  |
| ENSG00000119541 | ACAAGGU  |
| ENSG00000119541 | AUUGCAC  |
| ENSG00000119541 | CACAGUG  |
| ENSG00000119541 | CUUUGGU  |
| ENSG00000119541 | UGUCUUU  |
| ENSG00000119547 | AACCUGG  |
| ENSG00000119547 | AAGAACC  |
| ENSG00000119547 | AAGCGCU  |
| ENSG00000119547 | AAGGCAC  |
| ENSG00000119547 | AAUACUG  |
| ENSG00000119547 | AAUCACU  |
| ENSG00000119547 | ACACACC  |
| ENSG00000119547 | ACACACU  |
| ENSG00000119547 | ACAGUAC  |
| ENSG00000119547 | ACUCAGC  |
| ENSG00000119547 | ACUGCAU  |
| ENSG00000119547 | ACUGGCU  |
| ENSG00000119547 | ACUGUGU  |
| ENSG00000119547 | AGCACCA  |
| ENSG00000119547 | AGCAGCA  |
| ENSG00000119547 | AGCAGCU  |
| ENSG00000119547 | AGGGUUG  |
| ENSG00000119547 | AUACCUC  |
| ENSG00000119547 | AUCCUUU  |
| ENSG00000119547 | AUGCACC  |
| ENSG00000119547 | CAA AUGC |
| ENSG00000119547 | CAAGAGC  |

|                 |         |
|-----------------|---------|
| ENSG00000119547 | CACAGGG |
| ENSG00000119547 | CACCAGC |
| ENSG00000119547 | CAGUAC  |
| ENSG00000119547 | CCAGUGC |
| ENSG00000119547 | CCCUGAG |
| ENSG00000119547 | CCCUGUC |
| ENSG00000119547 | CUCCAGC |
| ENSG00000119547 | CUUACAG |
| ENSG00000119547 | GAAUUGU |
| ENSG00000119547 | GAGCUGC |
| ENSG00000119547 | GAGUGUG |
| ENSG00000119547 | GAGUUGA |
| ENSG00000119547 | GAGUUGG |
| ENSG00000119547 | GAUUGGU |
| ENSG00000119547 | GCACCAU |
| ENSG00000119547 | GCCCUGU |
| ENSG00000119547 | GCUUCCU |
| ENSG00000119547 | GGAGGCA |
| ENSG00000119547 | GGCAGUG |
| ENSG00000119547 | GGGCCCC |
| ENSG00000119547 | GUAAACA |
| ENSG00000119547 | GUAUUCU |
| ENSG00000119547 | GUCCAGA |
| ENSG00000119547 | GUGACAG |
| ENSG00000119547 | UACAAAG |
| ENSG00000119547 | UCAUUCG |
| ENSG00000119547 | UCCAGUU |
| ENSG00000119547 | UCCUGU  |
| ENSG00000119547 | UCUCAAG |
| ENSG00000119547 | UCUCACC |
| ENSG00000119547 | UCUGGAG |
| ENSG00000119547 | UCUUGAG |
| ENSG00000119547 | UGAAAGG |
| ENSG00000119547 | UGAAGCU |
| ENSG00000119547 | UGCAUAG |
| ENSG00000119547 | UGCAUUG |
| ENSG00000119547 | UGCUCAC |
| ENSG00000119547 | UGUCUGC |
| ENSG00000119547 | UUCAAGC |
| ENSG00000119596 | AAAGUUU |
| ENSG00000119596 | ACAGUAC |
| ENSG00000119596 | ACAGUAU |
| ENSG00000119596 | AUACCUC |
| ENSG00000119596 | AUGAUGA |
| ENSG00000119596 | GUGACAG |
| ENSG00000119614 | AAUUUUA |
| ENSG00000119614 | ACACACU |
| ENSG00000119614 | ACAUUAC |
| ENSG00000119614 | CACAGGG |
| ENSG00000119614 | UAUUACC |
| ENSG00000119614 | UCACAGG |
| ENSG00000119614 | UCUCACC |
| ENSG00000119614 | UUCAAAU |
| ENSG00000119630 | AAGGCAC |
| ENSG00000119630 | CAAGAGC |
| ENSG00000119630 | CAGCAGA |
| ENSG00000119630 | CUGGCUC |
| ENSG00000119630 | UCCUGAG |
| ENSG00000119638 | AAGUGUG |
| ENSG00000119661 | AGAUGUG |
| ENSG00000119661 | AGCACCA |
| ENSG00000119661 | AGGCAGG |
| ENSG00000119661 | AUAAAGU |
| ENSG00000119661 | AUGGCUU |

|                 |          |
|-----------------|----------|
| ENSG00000119661 | CAAAGCA  |
| ENSG00000119661 | CUGUUGA  |
| ENSG00000119661 | GAGGCAG  |
| ENSG00000119661 | GAGGUAG  |
| ENSG00000119661 | GAGUUGG  |
| ENSG00000119661 | GAUUGUA  |
| ENSG00000119661 | GAUUGUC  |
| ENSG00000119661 | GCUACAU  |
| ENSG00000119661 | GUGCUUG  |
| ENSG00000119661 | UGUAUAA  |
| ENSG00000119661 | UGUUGAA  |
| ENSG00000119661 | UUAGAGA  |
| ENSG00000119669 | AACACUG  |
| ENSG00000119669 | AAGGCAC  |
| ENSG00000119669 | ACAUUAC  |
| ENSG00000119669 | ACCAGCA  |
| ENSG00000119669 | ACUGGCC  |
| ENSG00000119669 | AGCAGCA  |
| ENSG00000119669 | CAAUUGC  |
| ENSG00000119669 | CACCAGC  |
| ENSG00000119669 | CGUGCAU  |
| ENSG00000119669 | UAAGACU  |
| ENSG00000119669 | UAUAAAAG |
| ENSG00000119669 | UAUUACC  |
| ENSG00000119669 | UGUAUAA  |
| ENSG00000119669 | UUGGCAA  |
| ENSG00000119681 | AAAAAUC  |
| ENSG00000119681 | GAAGGAA  |
| ENSG00000119681 | GGUGGUC  |
| ENSG00000119681 | GGUGGUU  |
| ENSG00000119682 | AGCAGCU  |
| ENSG00000119682 | AUGGCUU  |
| ENSG00000119682 | CAGUAGU  |
| ENSG00000119682 | CCAGGAG  |
| ENSG00000119682 | CCCUGAG  |
| ENSG00000119682 | GACCAUG  |
| ENSG00000119682 | GAGAAGA  |
| ENSG00000119682 | GCUGGAU  |
| ENSG00000119682 | GCUGGUG  |
| ENSG00000119682 | UCCAGUU  |
| ENSG00000119682 | UUGGCAA  |
| ENSG00000119682 | UUGGCAC  |
| ENSG00000119684 | AGCAGCA  |
| ENSG00000119684 | CCUUCUU  |
| ENSG00000119684 | UGAAAGG  |
| ENSG00000119684 | UUCUAAU  |
| ENSG00000119685 | AAAGAGC  |
| ENSG00000119689 | AGCAAAA  |
| ENSG00000119689 | AGCAGCA  |
| ENSG00000119689 | CAAAGCA  |
| ENSG00000119689 | GAGAAGA  |
| ENSG00000119689 | GAGGUAG  |
| ENSG00000119689 | GGUUACC  |
| ENSG00000119689 | GUGCUUG  |
| ENSG00000119689 | UGUGCUU  |
| ENSG00000119699 | AUACAAG  |
| ENSG00000119699 | CCAGGAG  |
| ENSG00000119699 | GCUUCCU  |
| ENSG00000119703 | CAAAGUG  |
| ENSG00000119703 | CUUACAG  |
| ENSG00000119703 | GGAAUGU  |
| ENSG00000119703 | GGAGGCA  |
| ENSG00000119703 | GGGUUUA  |
| ENSG00000119703 | UCUUGAG  |

|                 |          |
|-----------------|----------|
| ENSG00000119703 | UGAGGAC  |
| ENSG00000119707 | UAAUAUC  |
| ENSG00000119707 | UAUAAAAG |
| ENSG00000119707 | UGAAAUG  |
| ENSG00000119714 | GUGACAG  |
| ENSG00000119718 | AGCAGCA  |
| ENSG00000119720 | AUAAUAC  |
| ENSG00000119720 | AUAU AAC |
| ENSG00000119720 | AUGUAAU  |
| ENSG00000119725 | CCAGGAG  |
| ENSG00000119725 | UGCAGCU  |
| ENSG00000119729 | CCCUGAG  |
| ENSG00000119760 | AAAGCUG  |
| ENSG00000119760 | UCAUGAU  |
| ENSG00000119760 | UGCCCUG  |
| ENSG00000119772 | ACAGU AU |
| ENSG00000119772 | AGCACCA  |
| ENSG00000119772 | CAGUAGU  |
| ENSG00000119772 | CUUCUCU  |
| ENSG00000119772 | GCACCAU  |
| ENSG00000119772 | GUAACAG  |
| ENSG00000119772 | UAUUGCU  |
| ENSG00000119778 | AAGAACC  |
| ENSG00000119778 | AAGGCAC  |
| ENSG00000119778 | ACAGUAC  |
| ENSG00000119778 | ACAGU AU |
| ENSG00000119778 | ACUGCAG  |
| ENSG00000119778 | CAAAGUG  |
| ENSG00000119778 | CAGUAGU  |
| ENSG00000119778 | CCAUUAC  |
| ENSG00000119778 | GAGGUAG  |
| ENSG00000119778 | GGCUCUG  |
| ENSG00000119778 | UACAGUU  |
| ENSG00000119778 | UGCAU AU |
| ENSG00000119782 | AAGGCAC  |
| ENSG00000119782 | AUGUCUG  |
| ENSG00000119782 | CAAGAGC  |
| ENSG00000119782 | CUCCAGC  |
| ENSG00000119801 | AUGGCAC  |
| ENSG00000119812 | AAAAACC  |
| ENSG00000119812 | CACACCU  |
| ENSG00000119812 | UCACAGG  |
| ENSG00000119812 | UCACAGU  |
| ENSG00000119820 | CACAAUG  |
| ENSG00000119820 | CUUUGGU  |
| ENSG00000119820 | UUGGCAA  |
| ENSG00000119844 | ACAUUCA  |
| ENSG00000119844 | AGGACAC  |
| ENSG00000119844 | AGUGGUU  |
| ENSG00000119844 | CCAGUGU  |
| ENSG00000119865 | GAUUGUC  |
| ENSG00000119865 | GUCCAGA  |
| ENSG00000119866 | AAAAGUA  |
| ENSG00000119866 | AAACGGU  |
| ENSG00000119866 | AAAGGUA  |
| ENSG00000119866 | AAAUUUC  |
| ENSG00000119866 | AACGGAA  |
| ENSG00000119866 | AAGAACC  |
| ENSG00000119866 | AAGGCAC  |
| ENSG00000119866 | AAUGUUG  |
| ENSG00000119866 | AAUU AUU |
| ENSG00000119866 | ACAGU AU |
| ENSG00000119866 | ACUCAA   |
| ENSG00000119866 | ACUGUAG  |



|                 |          |
|-----------------|----------|
| ENSG00000119866 | ACUGUGU  |
| ENSG00000119866 | AGAUAAA  |
| ENSG00000119866 | AGGUAGU  |
| ENSG00000119866 | AGUACUG  |
| ENSG00000119866 | AGUGCAA  |
| ENSG00000119866 | AGUGGUU  |
| ENSG00000119866 | AGUGUGC  |
| ENSG00000119866 | AUAAAGU  |
| ENSG00000119866 | AUAU AAC |
| ENSG00000119866 | AUCCUUG  |
| ENSG00000119866 | AUGAUGA  |
| ENSG00000119866 | AUGCAUU  |
| ENSG00000119866 | AUGGCUU  |
| ENSG00000119866 | CAAAGUG  |
| ENSG00000119866 | CACCACC  |
| ENSG00000119866 | CAGACAG  |
| ENSG00000119866 | CAGUGCA  |
| ENSG00000119866 | CUGGAAA  |
| ENSG00000119866 | CUUGUAU  |
| ENSG00000119866 | CUUUGGU  |
| ENSG00000119866 | GACAACU  |
| ENSG00000119866 | GAGAACC  |
| ENSG00000119866 | GAGAACU  |
| ENSG00000119866 | GAGUGUG  |
| ENSG00000119866 | GAUUGUC  |
| ENSG00000119866 | GCAACUU  |
| ENSG00000119866 | GCUGGAU  |
| ENSG00000119866 | GGAAUGU  |
| ENSG00000119866 | GGCAGCG  |
| ENSG00000119866 | GGGGCAG  |
| ENSG00000119866 | GUAAACA  |
| ENSG00000119866 | UACAAAG  |
| ENSG00000119866 | UAGGU AU |
| ENSG00000119866 | UAUAUGA  |
| ENSG00000119866 | UAUUGCU  |
| ENSG00000119866 | UCACAGG  |
| ENSG00000119866 | UCACAGU  |
| ENSG00000119866 | UCCCUUG  |
| ENSG00000119866 | UCCCUUU  |
| ENSG00000119866 | UCCUUGC  |
| ENSG00000119866 | UGAAGUG  |
| ENSG00000119866 | UGCAUAG  |
| ENSG00000119866 | UGCAUUG  |
| ENSG00000119866 | UGUGCUU  |
| ENSG00000119866 | UUCAAAU  |
| ENSG00000119866 | UUCAAGC  |
| ENSG00000119866 | UUCCUAG  |
| ENSG00000119866 | UUGGCAC  |
| ENSG00000119866 | UUGGUCC  |
| ENSG00000119866 | UUUCAAC  |
| ENSG00000119878 | AAGUGCA  |
| ENSG00000119899 | AGGGAGG  |
| ENSG00000119899 | GCCUGGG  |
| ENSG00000119899 | GUAGUGU  |
| ENSG00000119899 | UACAAAG  |
| ENSG00000119899 | UAUAAAG  |
| ENSG00000119899 | UGUUGAA  |
| ENSG00000119899 | UUGGUUC  |
| ENSG00000119906 | AAAACUG  |
| ENSG00000119906 | AAAUUUC  |
| ENSG00000119906 | AAGGCAC  |
| ENSG00000119906 | AAGUGCA  |
| ENSG00000119906 | AAUACUG  |
| ENSG00000119906 | AAUCUCU  |

|                 |         |
|-----------------|---------|
| ENSG00000119906 | ACAUUCA |
| ENSG00000119906 | ACCUGGA |
| ENSG00000119906 | AGCAGCU |
| ENSG00000119906 | AGGUAGU |
| ENSG00000119906 | AGUGCAA |
| ENSG00000119906 | AGUGGUU |
| ENSG00000119906 | CAAAGUG |
| ENSG00000119906 | CACAAUG |
| ENSG00000119906 | CACCACC |
| ENSG00000119906 | CAGUGCA |
| ENSG00000119906 | CAGUUAC |
| ENSG00000119906 | CCAGUGU |
| ENSG00000119906 | CUACAAA |
| ENSG00000119906 | CUGACUC |
| ENSG00000119906 | CUUGGAG |
| ENSG00000119906 | GACCUGG |
| ENSG00000119906 | GAGAACC |
| ENSG00000119906 | GUGCAAA |
| ENSG00000119906 | UUCAAGC |
| ENSG00000119919 | ACACGGG |
| ENSG00000119919 | CCUGUAC |
| ENSG00000119919 | CCUUCAU |
| ENSG00000119919 | GGCAGCG |
| ENSG00000119919 | GUAGUGU |
| ENSG00000119922 | UUGGUCC |
| ENSG00000119927 | AAAAGUA |
| ENSG00000119927 | AAGGCAC |
| ENSG00000119927 | AGCACCA |
| ENSG00000119927 | AUGCAUU |
| ENSG00000119927 | AUGGCAC |
| ENSG00000119927 | CUUUGGU |
| ENSG00000119927 | GAAAACA |
| ENSG00000119927 | GAGGCAG |
| ENSG00000119927 | GGAAGCC |
| ENSG00000119927 | GGUUGAC |
| ENSG00000119927 | GUGCUUG |
| ENSG00000119927 | UAUUGCU |
| ENSG00000119927 | UGUCUUU |
| ENSG00000119938 | GAAGGAA |
| ENSG00000119946 | AAGAACC |
| ENSG00000119946 | ACUCCAG |
| ENSG00000119946 | CAGGCUC |
| ENSG00000119946 | CCCUGAG |
| ENSG00000119946 | CUGGCUC |
| ENSG00000119946 | CUGGGCA |
| ENSG00000119946 | CUUUGGU |
| ENSG00000119946 | GACCUGG |
| ENSG00000119946 | GAGAUGA |
| ENSG00000119946 | GCAGAAG |
| ENSG00000119946 | GGGUAAG |
| ENSG00000119946 | GUGACAG |
| ENSG00000119946 | GUGCCUG |
| ENSG00000119946 | GUGGCC  |
| ENSG00000119946 | UCCAGAG |
| ENSG00000119946 | UGCAUUG |
| ENSG00000119946 | UGGAGAU |
| ENSG00000119946 | UGGCUGC |
| ENSG00000119946 | UUGGUUC |
| ENSG00000119950 | AAGACAU |
| ENSG00000119950 | GGCUCAG |
| ENSG00000119953 | CUAUACA |
| ENSG00000119953 | GAGAUGA |
| ENSG00000119969 | GGAAGAC |
| ENSG00000119969 | UGUAUAA |

|                 |         |
|-----------------|---------|
| ENSG00000119979 | AAAGUGC |
| ENSG00000119979 | AAGUGCA |
| ENSG00000119979 | AGUGCAA |
| ENSG00000119979 | CAAAGCA |
| ENSG00000119979 | UACAAAG |
| ENSG00000119979 | UCAAGUA |
| ENSG00000120029 | ACCAGCA |
| ENSG00000120029 | AGCAGCU |
| ENSG00000120029 | CAGCAA  |
| ENSG00000120029 | CUGCUC  |
| ENSG00000120029 | CUGGAAA |
| ENSG00000120029 | GGGAGCU |
| ENSG00000120029 | GUAAACA |
| ENSG00000120029 | UCUCAA  |
| ENSG00000120029 | UUCAAGC |
| ENSG00000120049 | AGCACCA |
| ENSG00000120049 | CAAAGCA |
| ENSG00000120049 | CACCACC |
| ENSG00000120049 | CCCCCAG |
| ENSG00000120049 | CUGCCCC |
| ENSG00000120049 | GACCUGG |
| ENSG00000120049 | GCACCAU |
| ENSG00000120049 | UACAAAG |
| ENSG00000120049 | UGCAAAG |
| ENSG00000120053 | AGGCAGG |
| ENSG00000120053 | GGUGGUC |
| ENSG00000120053 | GGUGGUU |
| ENSG00000120057 | AAGGCAC |
| ENSG00000120063 | AAACUGU |
| ENSG00000120063 | AGCCCUU |
| ENSG00000120063 | AUGUAAU |
| ENSG00000120063 | CACAGUG |
| ENSG00000120063 | CAGGAAC |
| ENSG00000120063 | GGCAAGA |
| ENSG00000120063 | UCACAGU |
| ENSG00000120068 | ACAUUCA |
| ENSG00000120068 | AGGCAGG |
| ENSG00000120068 | AGGUAGU |
| ENSG00000120068 | CACAGUG |
| ENSG00000120068 | GUAAACA |
| ENSG00000120068 | UCACAGG |
| ENSG00000120071 | AAAGAAU |
| ENSG00000120071 | AAAUUUC |
| ENSG00000120071 | AACAAAC |
| ENSG00000120071 | AAGACAU |
| ENSG00000120071 | AAUGCCC |
| ENSG00000120071 | AUACAAG |
| ENSG00000120071 | AUGAUGA |
| ENSG00000120071 | AUGAUGC |
| ENSG00000120071 | AUGCAUU |
| ENSG00000120071 | CAAAGCA |
| ENSG00000120071 | CUUCUCU |
| ENSG00000120071 | GCUACAU |
| ENSG00000120071 | GUGCUUG |
| ENSG00000120071 | UAAUGCU |
| ENSG00000120071 | UAUAAAG |
| ENSG00000120071 | UGAAGCU |
| ENSG00000120071 | UGCAUAG |
| ENSG00000120071 | UGUGCUU |
| ENSG00000120071 | UGUUGAA |
| ENSG00000120075 | AACACUG |
| ENSG00000120075 | ACCACAG |
| ENSG00000120075 | CAGUCCA |
| ENSG00000120075 | UAUAAAG |

|                 |         |
|-----------------|---------|
| ENSG00000120075 | UCCCACC |
| ENSG00000120087 | ACAUAGA |
| ENSG00000120088 | AGAUAAA |
| ENSG00000120088 | AGGCAGG |
| ENSG00000120088 | GGCAGUG |
| ENSG00000120088 | UGCUCAC |
| ENSG00000120088 | UUGGUUC |
| ENSG00000120093 | AAAGUAA |
| ENSG00000120093 | AAAGUUU |
| ENSG00000120093 | AAGUCAC |
| ENSG00000120093 | AAGUGCU |
| ENSG00000120093 | ACAAUUA |
| ENSG00000120093 | AGUGCAA |
| ENSG00000120093 | AUGCCUU |
| ENSG00000120093 | CAAGAGC |
| ENSG00000120093 | CACAGUG |
| ENSG00000120093 | CCAUUAC |
| ENSG00000120093 | CCCUGAG |
| ENSG00000120093 | CCCUGUU |
| ENSG00000120093 | CUAUACA |
| ENSG00000120093 | CUCACAC |
| ENSG00000120093 | GAGCCCU |
| ENSG00000120093 | GUGCUUG |
| ENSG00000120093 | GUUCAUG |
| ENSG00000120093 | UCACAGU |
| ENSG00000120093 | UCCUCU  |
| ENSG00000120093 | UGUGCUU |
| ENSG00000120093 | UUCAAAU |
| ENSG00000120129 | ACAGUAU |
| ENSG00000120129 | GAGGUAG |
| ENSG00000120137 | AAAGAGC |
| ENSG00000120137 | AAGUGCA |
| ENSG00000120137 | ACUGGCU |
| ENSG00000120137 | AGCAGCU |
| ENSG00000120137 | AGCUUAU |
| ENSG00000120137 | AGUACUG |
| ENSG00000120137 | AGUGCAA |
| ENSG00000120137 | AUCCUUG |
| ENSG00000120137 | AUUGCAC |
| ENSG00000120137 | CUUUGGU |
| ENSG00000120137 | GAGGCUG |
| ENSG00000120137 | UGCAUUG |
| ENSG00000120149 | AACUCUA |
| ENSG00000120149 | UUCAAAU |
| ENSG00000120158 | UUGGUCC |
| ENSG00000120159 | AAGUCUU |
| ENSG00000120159 | UCCUGAG |
| ENSG00000120162 | AAAGCUG |
| ENSG00000120162 | AAAUUUC |
| ENSG00000120162 | AACAAAC |
| ENSG00000120162 | AACACUG |
| ENSG00000120162 | ACAUUCA |
| ENSG00000120162 | AGAUAAA |
| ENSG00000120162 | AGCAGCG |
| ENSG00000120162 | AGCAGCU |
| ENSG00000120162 | AGCCCUU |
| ENSG00000120162 | AGUGCAA |
| ENSG00000120162 | CAAAACU |
| ENSG00000120162 | CACAGGG |
| ENSG00000120162 | CACUGUU |
| ENSG00000120162 | CAGUCUG |
| ENSG00000120162 | CCAGUAC |
| ENSG00000120162 | GAAGGAA |
| ENSG00000120162 | GAGGUAG |

|                 |          |
|-----------------|----------|
| ENSG00000120162 | GCUAGCA  |
| ENSG00000120162 | GUCCAGA  |
| ENSG00000120162 | UCCAGUU  |
| ENSG00000120162 | UCCUCU   |
| ENSG00000120162 | UGAAAUG  |
| ENSG00000120162 | UUCAAAU  |
| ENSG00000120162 | UUGGCAA  |
| ENSG00000120215 | GUUCAUG  |
| ENSG00000120217 | UGAGAAU  |
| ENSG00000120251 | AAACUGU  |
| ENSG00000120251 | AAGUCUU  |
| ENSG00000120251 | AAGUGUG  |
| ENSG00000120251 | ACAUUCA  |
| ENSG00000120251 | ACUCAA   |
| ENSG00000120251 | ACUGGAU  |
| ENSG00000120251 | ACUGUAG  |
| ENSG00000120251 | AGAUGUG  |
| ENSG00000120251 | AGCCAGU  |
| ENSG00000120251 | AGUGUGC  |
| ENSG00000120251 | CAUGGAU  |
| ENSG00000120251 | CCUGUAC  |
| ENSG00000120251 | GGAAGCC  |
| ENSG00000120251 | GGAGUCC  |
| ENSG00000120251 | GUGCUUG  |
| ENSG00000120251 | UCAUUCG  |
| ENSG00000120251 | UCUCACC  |
| ENSG00000120251 | UCUGGAA  |
| ENSG00000120251 | UGUGCUU  |
| ENSG00000120251 | UUCAAAU  |
| ENSG00000120253 | UAGUGAG  |
| ENSG00000120254 | CUUUGGU  |
| ENSG00000120265 | ACUGCAU  |
| ENSG00000120265 | AGCAGCU  |
| ENSG00000120265 | GGAAGAC  |
| ENSG00000120265 | UUGGCAC  |
| ENSG00000120278 | CCCACCU  |
| ENSG00000120280 | UGAAAUG  |
| ENSG00000120314 | AUAUUUAU |
| ENSG00000120314 | GCUGGUG  |
| ENSG00000120314 | GUCUUGC  |
| ENSG00000120332 | AGUGGUU  |
| ENSG00000120332 | GGUUUAC  |
| ENSG00000120332 | UUAUGCA  |
| ENSG00000120334 | GAAAACA  |
| ENSG00000120341 | CAAAACU  |
| ENSG00000120341 | GCCUGGG  |
| ENSG00000120458 | AAUCCUU  |
| ENSG00000120458 | UAUUGCU  |
| ENSG00000120519 | AAGUCUU  |
| ENSG00000120519 | AGCUUAU  |
| ENSG00000120519 | CACAGUG  |
| ENSG00000120519 | UAAGACG  |
| ENSG00000120519 | UCACACA  |
| ENSG00000120519 | UCACAGU  |
| ENSG00000120539 | AUAAAGU  |
| ENSG00000120549 | AACUACU  |
| ENSG00000120549 | ACAGUAC  |
| ENSG00000120549 | AGCCCUU  |
| ENSG00000120549 | AGUGCAA  |
| ENSG00000120549 | AUGUGCC  |
| ENSG00000120549 | CAAUUGC  |
| ENSG00000120549 | CACAAUG  |
| ENSG00000120549 | CAGUGCA  |
| ENSG00000120549 | CUUUGGU  |

|                 |         |
|-----------------|---------|
| ENSG00000120549 | UUGGCAC |
| ENSG00000120586 | UGCCAGC |
| ENSG00000120616 | AGCACCA |
| ENSG00000120616 | AGCUGCC |
| ENSG00000120616 | AUCCCUU |
| ENSG00000120616 | UCCCUUG |
| ENSG00000120616 | UGCAUAG |
| ENSG00000120656 | AAAGUAC |
| ENSG00000120656 | ACAUUAC |
| ENSG00000120659 | AAAGUGC |
| ENSG00000120659 | AAGUGCA |
| ENSG00000120659 | ACAUUAC |
| ENSG00000120659 | CAAAGUG |
| ENSG00000120675 | AGGGUCU |
| ENSG00000120685 | AAAAACC |
| ENSG00000120685 | AAAGUUU |
| ENSG00000120685 | AACAUUC |
| ENSG00000120685 | ACAGUAC |
| ENSG00000120685 | ACAGUAU |
| ENSG00000120685 | AGCACCA |
| ENSG00000120685 | CAGCAGA |
| ENSG00000120685 | CAGCAGG |
| ENSG00000120685 | CUACAGU |
| ENSG00000120685 | GAAAACA |
| ENSG00000120685 | UUGUUCG |
| ENSG00000120686 | UGAAAGG |
| ENSG00000120688 | ACAUAGA |
| ENSG00000120688 | GAGCUGC |
| ENSG00000120688 | UAAUACA |
| ENSG00000120690 | CCUUCAU |
| ENSG00000120694 | UCACAAG |
| ENSG00000120696 | UUCUAAU |
| ENSG00000120705 | AACAAAC |
| ENSG00000120705 | AAGGCAC |
| ENSG00000120705 | AAUCUCA |
| ENSG00000120705 | ACCCAUU |
| ENSG00000120705 | AUACAAG |
| ENSG00000120705 | CUACAAA |
| ENSG00000120705 | GCUGGAU |
| ENSG00000120705 | GGCAGGG |
| ENSG00000120705 | UAUGGUU |
| ENSG00000120708 | UACAAAG |
| ENSG00000120708 | UAUUACC |
| ENSG00000120709 | AAAACUG |
| ENSG00000120709 | ACACACU |
| ENSG00000120709 | AGCACCA |
| ENSG00000120709 | AGGGUCU |
| ENSG00000120709 | CAGCAGG |
| ENSG00000120709 | CCCUGAG |
| ENSG00000120709 | CUCAGGG |
| ENSG00000120709 | CUGGGCA |
| ENSG00000120709 | GAGCCCC |
| ENSG00000120709 | GAGCCCU |
| ENSG00000120709 | GGAAGAC |
| ENSG00000120709 | GGAGGCA |
| ENSG00000120709 | GGCAGCG |
| ENSG00000120709 | GGGUAAG |
| ENSG00000120709 | GUGGCC  |
| ENSG00000120709 | GUGUGGC |
| ENSG00000120709 | UCACACA |
| ENSG00000120709 | UUCUAAU |
| ENSG00000120709 | UUGGCAA |
| ENSG00000120709 | UUGGCAC |
| ENSG00000120709 | UUUCAAC |

|                 |         |
|-----------------|---------|
| ENSG00000120727 | AAAACUG |
| ENSG00000120727 | AAACUGU |
| ENSG00000120727 | AAGUUGU |
| ENSG00000120727 | CAAAACU |
| ENSG00000120727 | UCACACA |
| ENSG00000120738 | AACAGUC |
| ENSG00000120738 | AACAUUC |
| ENSG00000120738 | AAGGCAC |
| ENSG00000120738 | ACAUUCA |
| ENSG00000120738 | ACUCAGC |
| ENSG00000120738 | ACUCAGG |
| ENSG00000120738 | CAGUAGU |
| ENSG00000120742 | AAGUAGC |
| ENSG00000120742 | ACUUGGA |
| ENSG00000120742 | AGGCAGG |
| ENSG00000120742 | AGUGCCU |
| ENSG00000120742 | AGUGUGC |
| ENSG00000120742 | AUGACAC |
| ENSG00000120742 | CACAGGG |
| ENSG00000120742 | CAGGAAC |
| ENSG00000120742 | GAAACAU |
| ENSG00000120742 | GAGUGUG |
| ENSG00000120742 | GGAAGAC |
| ENSG00000120742 | UACAAAG |
| ENSG00000120742 | UCACAGU |
| ENSG00000120756 | AAAGAAU |
| ENSG00000120756 | GAGGCAG |
| ENSG00000120756 | GUAAACA |
| ENSG00000120784 | ACAUUCA |
| ENSG00000120802 | CUACAAA |
| ENSG00000120805 | AAGUGCA |
| ENSG00000120805 | ACAUUCA |
| ENSG00000120805 | AGUAGUU |
| ENSG00000120805 | AGUGUGC |
| ENSG00000120805 | CUUUGGU |
| ENSG00000120805 | GUAGUGU |
| ENSG00000120805 | UCAUUUG |
| ENSG00000120805 | UUCCAUA |
| ENSG00000120833 | AGCUGCC |
| ENSG00000120833 | CUACAGU |
| ENSG00000120833 | GUAACAG |
| ENSG00000120833 | UGCAUAG |
| ENSG00000120833 | UGCAUUA |
| ENSG00000120833 | UUCUUGU |
| ENSG00000120833 | UUUGCAC |
| ENSG00000120837 | AAAAGUA |
| ENSG00000120837 | AAACUGU |
| ENSG00000120837 | AAAGGUA |
| ENSG00000120837 | AACAAAC |
| ENSG00000120837 | AACACUG |
| ENSG00000120837 | AACUCUA |
| ENSG00000120837 | AAUCUCU |
| ENSG00000120837 | AUAAUAC |
| ENSG00000120837 | AUUGCAC |
| ENSG00000120837 | CACCAGC |
| ENSG00000120837 | CACUGUU |
| ENSG00000120837 | CAGGAAC |
| ENSG00000120837 | GCAACUU |
| ENSG00000120837 | GUAAACA |
| ENSG00000120837 | GUCUACU |
| ENSG00000120837 | GUUAAUG |
| ENSG00000120837 | UAAUACA |
| ENSG00000120837 | UAAUAUC |
| ENSG00000120837 | UAUUGCU |

|                 |          |
|-----------------|----------|
| ENSG00000120837 | UCACCAC  |
| ENSG00000120837 | UCAUGAU  |
| ENSG00000120837 | UGCAUUG  |
| ENSG00000120837 | UUCUGCA  |
| ENSG00000120868 | AAACUGU  |
| ENSG00000120868 | AAUUAUU  |
| ENSG00000120868 | AUGAUGA  |
| ENSG00000120868 | CACAGUG  |
| ENSG00000120868 | GUGCAAA  |
| ENSG00000120868 | UCACAGU  |
| ENSG00000120875 | GAGGUAG  |
| ENSG00000120875 | GAGGUAU  |
| ENSG00000120875 | UUCAAGC  |
| ENSG00000120885 | ACUGCAG  |
| ENSG00000120885 | CCUGCUG  |
| ENSG00000120885 | CUGCAGC  |
| ENSG00000120889 | AUAUAAC  |
| ENSG00000120889 | CAUAUUG  |
| ENSG00000120896 | CAAAGCA  |
| ENSG00000120896 | CAGCUGG  |
| ENSG00000120896 | CCUGUU   |
| ENSG00000120896 | UUGGUCC  |
| ENSG00000120899 | AGGCAGG  |
| ENSG00000120899 | CGUGCAU  |
| ENSG00000120899 | GUGCAAA  |
| ENSG00000120899 | UCGUGCA  |
| ENSG00000120903 | UCACCAC  |
| ENSG00000120913 | AUGUGGG  |
| ENSG00000120913 | CAGCAGG  |
| ENSG00000120913 | CAGGAAC  |
| ENSG00000120913 | GGAAGCC  |
| ENSG00000120913 | GUGCCUG  |
| ENSG00000120913 | GUGGGGA  |
| ENSG00000120913 | UGUGUGG  |
| ENSG00000120913 | UUGAUCA  |
| ENSG00000120913 | UUGUGUC  |
| ENSG00000120925 | AUCCCUU  |
| ENSG00000120948 | AAAAAUC  |
| ENSG00000120948 | AAGUCUU  |
| ENSG00000120948 | AAUACUG  |
| ENSG00000120948 | ACAAGGU  |
| ENSG00000120948 | ACACACC  |
| ENSG00000120948 | ACAUUCA  |
| ENSG00000120948 | AGCAUUC  |
| ENSG00000120948 | AGUGCUU  |
| ENSG00000120948 | AUGCACC  |
| ENSG00000120948 | CAAAGCA  |
| ENSG00000120948 | CAGCAAA  |
| ENSG00000120948 | CCUUCUG  |
| ENSG00000120948 | CUGCAGC  |
| ENSG00000120948 | GCAGCAU  |
| ENSG00000120948 | GUCUCUG  |
| ENSG00000120948 | UCACAGG  |
| ENSG00000120948 | UCACAGU  |
| ENSG00000120948 | UCUCACC  |
| ENSG00000120948 | UGAAGUG  |
| ENSG00000120949 | UCCCUUG  |
| ENSG00000120949 | UCCCUUU  |
| ENSG00000120963 | ACAAUUAU |
| ENSG00000120963 | ACCCUGU  |
| ENSG00000120963 | AGCAGCU  |
| ENSG00000120963 | CAAAGUG  |
| ENSG00000120963 | CAGUAGA  |
| ENSG00000120963 | CCAGUGU  |



|                 |         |
|-----------------|---------|
| ENSG00000120963 | CUGCAGG |
| ENSG00000120963 | GAAUUGU |
| ENSG00000120963 | GCAGGUU |
| ENSG00000120963 | GGACUGC |
| ENSG00000120963 | GUAAACA |
| ENSG00000120963 | UCAACAG |
| ENSG00000120963 | UGCUGAC |
| ENSG00000120963 | UGGACUG |
| ENSG00000120963 | UGUGUCA |
| ENSG00000120963 | UUUUUGC |
| ENSG00000120992 | AGCACCA |
| ENSG00000120992 | AUGAUGC |
| ENSG00000120992 | AUGCAUU |
| ENSG00000120992 | UGCAAAG |
| ENSG00000120992 | UUUGCAA |
| ENSG00000121005 | CUCUCC  |
| ENSG00000121005 | CUGCAGG |
| ENSG00000121005 | GAAACAU |
| ENSG00000121005 | GAGUAUU |
| ENSG00000121005 | GCAGGAC |
| ENSG00000121005 | UACAAAG |
| ENSG00000121005 | UGCCAGC |
| ENSG00000121039 | AAGACAU |
| ENSG00000121039 | ACUGUAG |
| ENSG00000121039 | AGCAAAA |
| ENSG00000121039 | CUACAAA |
| ENSG00000121039 | GAGCUGC |
| ENSG00000121039 | UAAUACA |
| ENSG00000121039 | UACAAAG |
| ENSG00000121039 | UCCCAUA |
| ENSG00000121039 | UUGGCAC |
| ENSG00000121057 | AAAUGGU |
| ENSG00000121057 | CCAGUGC |
| ENSG00000121057 | CUCCAGC |
| ENSG00000121057 | CUUGUAU |
| ENSG00000121057 | GUGCAAA |
| ENSG00000121057 | UCCCUUG |
| ENSG00000121057 | UCUCCAA |
| ENSG00000121057 | UUUGCAC |
| ENSG00000121058 | GAAGGAA |
| ENSG00000121058 | GAGGUAU |
| ENSG00000121058 | GGAAUGU |
| ENSG00000121058 | UGAAAGG |
| ENSG00000121060 | CUACAAA |
| ENSG00000121060 | CUGACUC |
| ENSG00000121060 | CUUUGGU |
| ENSG00000121060 | GAGCUGC |
| ENSG00000121060 | GCAGAAG |
| ENSG00000121067 | ACAGUAC |
| ENSG00000121068 | AAAGCUG |
| ENSG00000121068 | UAAUACA |
| ENSG00000121068 | UGCAUAG |
| ENSG00000121075 | CCUGAG  |
| ENSG00000121075 | CUGCAGC |
| ENSG00000121075 | UCUCCAA |
| ENSG00000121083 | CAGUCCA |
| ENSG00000121083 | CAGUGCA |
| ENSG00000121101 | UGAUCCA |
| ENSG00000121104 | AAAGUGC |
| ENSG00000121104 | AAGGCAC |
| ENSG00000121104 | AAGUGCU |
| ENSG00000121104 | AGCUGCC |
| ENSG00000121104 | CUUUGGU |
| ENSG00000121104 | GAGAUGA |

|                 |         |
|-----------------|---------|
| ENSG00000121104 | GAGCUGC |
| ENSG00000121104 | UGUCUUU |
| ENSG00000121104 | UUCUAAU |
| ENSG00000121207 | AAUCACU |
| ENSG00000121207 | ACACACC |
| ENSG00000121207 | GCCUGAU |
| ENSG00000121207 | GGAAUGU |
| ENSG00000121207 | UGAAAUG |
| ENSG00000121210 | AAAGUGC |
| ENSG00000121236 | UGCAUUG |
| ENSG00000121274 | AAAUUUC |
| ENSG00000121274 | AAGGCAC |
| ENSG00000121274 | AAGUCUU |
| ENSG00000121274 | AAGUGUG |
| ENSG00000121274 | AAUCCUU |
| ENSG00000121274 | ACAUCAC |
| ENSG00000121274 | ACCCUGU |
| ENSG00000121274 | ACUGUGU |
| ENSG00000121274 | CACAAUG |
| ENSG00000121274 | CACACCU |
| ENSG00000121274 | CACCACC |
| ENSG00000121274 | CAGUCUG |
| ENSG00000121274 | CAUAUUG |
| ENSG00000121274 | CCAGCAU |
| ENSG00000121274 | CCAUUAC |
| ENSG00000121274 | CCCUGUU |
| ENSG00000121274 | CCUUCAU |
| ENSG00000121274 | CUCCAGC |
| ENSG00000121274 | CUCCCAA |
| ENSG00000121274 | GAUCAGA |
| ENSG00000121274 | GAUUGGU |
| ENSG00000121274 | GCAGCAU |
| ENSG00000121274 | GCUGGUG |
| ENSG00000121274 | GUAAACA |
| ENSG00000121274 | GUCAGUU |
| ENSG00000121274 | UCACAAG |
| ENSG00000121274 | UCACAGG |
| ENSG00000121274 | UCACAUU |
| ENSG00000121274 | UCAUGAU |
| ENSG00000121274 | UCCACA  |
| ENSG00000121274 | UGAGGAC |
| ENSG00000121274 | UGAUCCA |
| ENSG00000121274 | UGCAAAG |
| ENSG00000121274 | UUAGAGA |
| ENSG00000121274 | UUAUGCA |
| ENSG00000121274 | UUGAGGC |
| ENSG00000121274 | UUGGUCC |
| ENSG00000121274 | UUUGCAA |
| ENSG00000121281 | AGCCCUU |
| ENSG00000121281 | AGUGCUU |
| ENSG00000121281 | CACAGUG |
| ENSG00000121281 | GUGCAA  |
| ENSG00000121281 | UGAAGCU |
| ENSG00000121297 | AAAGAGG |
| ENSG00000121297 | AAAGUAC |
| ENSG00000121297 | AAAGUAU |
| ENSG00000121297 | AAAGUGC |
| ENSG00000121297 | AAGUGCU |
| ENSG00000121297 | AAUCACU |
| ENSG00000121297 | AAUUUUA |
| ENSG00000121297 | ACUCAGC |
| ENSG00000121297 | ACUCAGG |
| ENSG00000121297 | AGAUAAA |
| ENSG00000121297 | AGAUGUG |

|                 |          |
|-----------------|----------|
| ENSG00000121297 | AGUAACA  |
| ENSG00000121297 | AGUGCUU  |
| ENSG00000121297 | AUGUGCC  |
| ENSG00000121297 | CAGCUGG  |
| ENSG00000121297 | CUUGGGC  |
| ENSG00000121297 | GAGAAAU  |
| ENSG00000121297 | GGUUACC  |
| ENSG00000121297 | GUGCCAC  |
| ENSG00000121297 | UAUAAAG  |
| ENSG00000121297 | UCACAUU  |
| ENSG00000121297 | UGCAGCU  |
| ENSG00000121297 | UUCUGCA  |
| ENSG00000121361 | AAGUGCU  |
| ENSG00000121380 | AUGAGCU  |
| ENSG00000121380 | GAGCUGC  |
| ENSG00000121380 | GAGUAUU  |
| ENSG00000121388 | AAAAGUA  |
| ENSG00000121388 | AAAGUAA  |
| ENSG00000121388 | AAGUGCA  |
| ENSG00000121388 | ACAUUAC  |
| ENSG00000121388 | CAGUCUG  |
| ENSG00000121388 | CCUUCAU  |
| ENSG00000121388 | CUCACAC  |
| ENSG00000121388 | GAGUGUG  |
| ENSG00000121388 | GGAGUGU  |
| ENSG00000121388 | UCACAGG  |
| ENSG00000121388 | UCACAGU  |
| ENSG00000121388 | UCUCACC  |
| ENSG00000121388 | UUGGCAC  |
| ENSG00000121481 | AAGUGCA  |
| ENSG00000121481 | ACAUUAC  |
| ENSG00000121481 | ACAUUCA  |
| ENSG00000121481 | AGUGCAA  |
| ENSG00000121481 | AUGGCAC  |
| ENSG00000121481 | GUGCAAA  |
| ENSG00000121481 | UAAUAUC  |
| ENSG00000121481 | UGAGAAU  |
| ENSG00000121486 | CUCCCAA  |
| ENSG00000121486 | UACAGUU  |
| ENSG00000121486 | UGAAAUG  |
| ENSG00000121578 | GCUGUCU  |
| ENSG00000121578 | UCUCACC  |
| ENSG00000121594 | GAGAACC  |
| ENSG00000121653 | AAACUGU  |
| ENSG00000121653 | ACAAUUAU |
| ENSG00000121653 | AUAUUUAU |
| ENSG00000121653 | AUGGCAC  |
| ENSG00000121671 | CACAGGG  |
| ENSG00000121671 | CAGCAGG  |
| ENSG00000121671 | CCCACCU  |
| ENSG00000121671 | CUCUGGG  |
| ENSG00000121671 | CUCUUCC  |
| ENSG00000121671 | CUGCAGC  |
| ENSG00000121671 | CUUCUCU  |
| ENSG00000121671 | GAAGGAA  |
| ENSG00000121671 | GAGGCUG  |
| ENSG00000121671 | GAGGUAG  |
| ENSG00000121671 | GGAAGAC  |
| ENSG00000121671 | GGAAGCC  |
| ENSG00000121671 | GGCUCAG  |
| ENSG00000121671 | UCACAAG  |
| ENSG00000121671 | UCACAGG  |
| ENSG00000121671 | UCUGGAG  |
| ENSG00000121671 | UGCUCAC  |

|                 |         |
|-----------------|---------|
| ENSG00000121671 | UGGCUGC |
| ENSG00000121741 | AAAAACC |
| ENSG00000121741 | ACAGUAU |
| ENSG00000121741 | ACAUUAC |
| ENSG00000121741 | AGCAGCG |
| ENSG00000121741 | AGCAGCU |
| ENSG00000121741 | AGCAUUC |
| ENSG00000121741 | CAAAACU |
| ENSG00000121741 | CAGUAGA |
| ENSG00000121741 | CUACAAA |
| ENSG00000121741 | GCUACAU |
| ENSG00000121741 | UAAUGCU |
| ENSG00000121741 | UACAAAG |
| ENSG00000121741 | UGGGUAC |
| ENSG00000121741 | UGGUACC |
| ENSG00000121742 | UAUAAAG |
| ENSG00000121742 | UGAAAUG |
| ENSG00000121743 | AACUCUA |
| ENSG00000121743 | AUGACAC |
| ENSG00000121743 | CAAAGCA |
| ENSG00000121743 | UUGGCAC |
| ENSG00000121749 | GGAAUGU |
| ENSG00000121749 | GUAAACA |
| ENSG00000121753 | CAAAGUG |
| ENSG00000121753 | CUGGCUC |
| ENSG00000121753 | GAGUGUG |
| ENSG00000121766 | AGCACCA |
| ENSG00000121766 | CAGCUGG |
| ENSG00000121766 | CUCCCAA |
| ENSG00000121766 | GGCAGCG |
| ENSG00000121766 | GGCAGUG |
| ENSG00000121766 | UACAAAG |
| ENSG00000121766 | UGCAAAG |
| ENSG00000121769 | GAGGCAG |
| ENSG00000121769 | UGACCUA |
| ENSG00000121774 | AAAGGUA |
| ENSG00000121774 | AGUAACA |
| ENSG00000121774 | AUACAAG |
| ENSG00000121774 | AUGUCUG |
| ENSG00000121774 | UCCCUUU |
| ENSG00000121775 | AACAAAC |
| ENSG00000121848 | AAAUUUC |
| ENSG00000121864 | GAAGGAA |
| ENSG00000121871 | AAAAGUA |
| ENSG00000121871 | AAAGCUG |
| ENSG00000121871 | AACAUUC |
| ENSG00000121871 | AAGGCAC |
| ENSG00000121871 | AAGUGCU |
| ENSG00000121871 | ACAUUAC |
| ENSG00000121871 | ACUGCAU |
| ENSG00000121871 | AGUGCUU |
| ENSG00000121871 | AUGCACC |
| ENSG00000121871 | AUGGCAC |
| ENSG00000121871 | CAGCAAA |
| ENSG00000121871 | CUACAAA |
| ENSG00000121871 | CUAUACA |
| ENSG00000121871 | GAGAACC |
| ENSG00000121871 | GAGAACU |
| ENSG00000121871 | GCAGCAU |
| ENSG00000121871 | GUGCCAC |
| ENSG00000121871 | UACAAAG |
| ENSG00000121879 | AAGGCAC |
| ENSG00000121879 | ACCCUGU |
| ENSG00000121879 | CCCUGUU |

|                 |          |
|-----------------|----------|
| ENSG00000121892 | AAAAGUA  |
| ENSG00000121892 | AAAGAAU  |
| ENSG00000121892 | AAAGCUG  |
| ENSG00000121892 | ACUCCAG  |
| ENSG00000121892 | AGCUGCC  |
| ENSG00000121892 | CAA AUGC |
| ENSG00000121892 | UGACUGU  |
| ENSG00000121895 | UCCAUA   |
| ENSG00000121897 | GAAGGUC  |
| ENSG00000121900 | AUAAAGU  |
| ENSG00000121904 | AAAAAUC  |
| ENSG00000121904 | AAAGUAC  |
| ENSG00000121904 | AAUCCUU  |
| ENSG00000121904 | ACAAUAU  |
| ENSG00000121904 | ACUGCAU  |
| ENSG00000121904 | AGAUAAA  |
| ENSG00000121904 | AUAAUAC  |
| ENSG00000121904 | CCCCUGG  |
| ENSG00000121904 | CUCCAGC  |
| ENSG00000121904 | CUGCAGC  |
| ENSG00000121904 | CUGCCC   |
| ENSG00000121904 | CUGGGCA  |
| ENSG00000121904 | GAAAACA  |
| ENSG00000121904 | GCGGGGC  |
| ENSG00000121904 | GGAAGCC  |
| ENSG00000121904 | GGCAGGG  |
| ENSG00000121904 | GGCGGGG  |
| ENSG00000121904 | GGGAGC   |
| ENSG00000121904 | UACAAAG  |
| ENSG00000121904 | UAUAAUA  |
| ENSG00000121904 | UAUUACC  |
| ENSG00000121904 | UGGUACC  |
| ENSG00000121905 | AGGGAGG  |
| ENSG00000121905 | CCCCAG   |
| ENSG00000121905 | UGGGGGA  |
| ENSG00000121940 | AACAUUC  |
| ENSG00000121940 | AAUUGCU  |
| ENSG00000121940 | GCUAGCA  |
| ENSG00000121964 | AAAAACC  |
| ENSG00000121964 | AAAGAAU  |
| ENSG00000121964 | AAAGUGC  |
| ENSG00000121964 | AACAGUC  |
| ENSG00000121964 | AACCUGG  |
| ENSG00000121964 | AACCUGU  |
| ENSG00000121964 | AAGUGCU  |
| ENSG00000121964 | AAGUGUG  |
| ENSG00000121964 | AGCCCUU  |
| ENSG00000121964 | AGGACAC  |
| ENSG00000121964 | AUACAAG  |
| ENSG00000121964 | AUGACAC  |
| ENSG00000121964 | CAGGCUC  |
| ENSG00000121964 | CGAGGAC  |
| ENSG00000121964 | CUGCAGC  |
| ENSG00000121964 | CUGCAGG  |
| ENSG00000121964 | GAUCAGA  |
| ENSG00000121964 | GCACCAU  |
| ENSG00000121964 | GCUUCCU  |
| ENSG00000121964 | GGCCUG   |
| ENSG00000121964 | GGCUGCG  |
| ENSG00000121964 | GGGUGGU  |
| ENSG00000121964 | GUGACUG  |
| ENSG00000121964 | GUGGCC   |
| ENSG00000121964 | GUGUCAC  |
| ENSG00000121964 | UAAUACA  |

|                 |          |
|-----------------|----------|
| ENSG00000121964 | UACAAAG  |
| ENSG00000121964 | UCUGGAA  |
| ENSG00000121964 | UGAAGCU  |
| ENSG00000121964 | UGAGGAC  |
| ENSG00000121964 | UGGCCCU  |
| ENSG00000121964 | UGUGUCA  |
| ENSG00000121964 | UUGUGAC  |
| ENSG00000121966 | CAGUCUG  |
| ENSG00000121989 | AAUACUG  |
| ENSG00000121989 | ACUGCAU  |
| ENSG00000121989 | ACUGGCU  |
| ENSG00000121989 | ACUGUGU  |
| ENSG00000121989 | AGCAGCG  |
| ENSG00000121989 | AGCUUUAU |
| ENSG00000121989 | AGGGAGG  |
| ENSG00000121989 | AGUAGUU  |
| ENSG00000121989 | AUACCUC  |
| ENSG00000121989 | CAAAUGC  |
| ENSG00000121989 | CAGCAAA  |
| ENSG00000121989 | CAUAUUG  |
| ENSG00000121989 | CCAGUGC  |
| ENSG00000121989 | CCAGUGU  |
| ENSG00000121989 | GAGGUAG  |
| ENSG00000121989 | GCUGGUG  |
| ENSG00000121989 | GUAGUGU  |
| ENSG00000121989 | GUCAUUG  |
| ENSG00000121989 | GUGUCAC  |
| ENSG00000121989 | UCACAGU  |
| ENSG00000121989 | UGAAAUG  |
| ENSG00000121989 | UGCAUAG  |
| ENSG00000121989 | UGUGUCA  |
| ENSG00000121989 | UGUUGAA  |
| ENSG00000122008 | AGUGCUU  |
| ENSG00000122012 | AUGGCUU  |
| ENSG00000122025 | ACAUAGA  |
| ENSG00000122025 | AGCAGCA  |
| ENSG00000122025 | AGUGAUC  |
| ENSG00000122025 | CAUAUUG  |
| ENSG00000122025 | UACAAAG  |
| ENSG00000122025 | UAGUGAG  |
| ENSG00000122042 | AAAGAAU  |
| ENSG00000122042 | ACAAUUAU |
| ENSG00000122042 | ACAGGUG  |
| ENSG00000122042 | ACAUCAC  |
| ENSG00000122042 | ACUGCAG  |
| ENSG00000122042 | AGCAGCA  |
| ENSG00000122042 | CUAUACA  |
| ENSG00000122042 | CUCCAC   |
| ENSG00000122042 | CUGCUCU  |
| ENSG00000122042 | GAUCAGA  |
| ENSG00000122042 | GCAGAAG  |
| ENSG00000122042 | GCAGCAU  |
| ENSG00000122042 | GUGCAAA  |
| ENSG00000122042 | GUGCCAC  |
| ENSG00000122042 | UCCAGUU  |
| ENSG00000122042 | UCCACA   |
| ENSG00000122042 | UGCAUUAU |
| ENSG00000122042 | UGUGCUU  |
| ENSG00000122042 | UUCAAAU  |
| ENSG00000122068 | AAAGUAC  |
| ENSG00000122068 | AACCUGU  |
| ENSG00000122068 | GCAUCCC  |
| ENSG00000122068 | GUAACAG  |
| ENSG00000122085 | AACCUGG  |

|                 |         |
|-----------------|---------|
| ENSG00000122085 | AUAAAGU |
| ENSG00000122121 | AACGGCU |
| ENSG00000122121 | AGGAUGU |
| ENSG00000122122 | GAGGUAU |
| ENSG00000122126 | AGCAGCA |
| ENSG00000122126 | AGCAGCG |
| ENSG00000122126 | AUAAUAC |
| ENSG00000122126 | CACUGUU |
| ENSG00000122126 | GAGGCAG |
| ENSG00000122126 | GUGCAA  |
| ENSG00000122126 | UGCAAAG |
| ENSG00000122176 | AGCAAAA |
| ENSG00000122176 | AUGAGCU |
| ENSG00000122176 | CAGCAA  |
| ENSG00000122176 | GGCAGGG |
| ENSG00000122176 | UCUGGAG |
| ENSG00000122180 | CACAAUG |
| ENSG00000122180 | CCCCAG  |
| ENSG00000122180 | GAGACCU |
| ENSG00000122180 | UCCUGAG |
| ENSG00000122180 | UGGCCU  |
| ENSG00000122203 | AAGUGCA |
| ENSG00000122203 | ACUCCAG |
| ENSG00000122203 | UUCCUAG |
| ENSG00000122223 | GAGCCCU |
| ENSG00000122223 | GCACCAU |
| ENSG00000122254 | AAAGUAC |
| ENSG00000122254 | GUAACAG |
| ENSG00000122254 | GUGCUUG |
| ENSG00000122254 | UGUGCUU |
| ENSG00000122257 | AAAGCUG |
| ENSG00000122257 | AAAGUUU |
| ENSG00000122257 | AGCAAAA |
| ENSG00000122257 | AUAAAGU |
| ENSG00000122299 | AAUCCUU |
| ENSG00000122299 | CAGCAA  |
| ENSG00000122304 | CUCAGGG |
| ENSG00000122335 | GGAAGAC |
| ENSG00000122359 | GCCCUGU |
| ENSG00000122359 | UCCUGAG |
| ENSG00000122359 | UUGGCAA |
| ENSG00000122359 | UUGGCAC |
| ENSG00000122367 | AAAACUG |
| ENSG00000122367 | ACUGCAG |
| ENSG00000122367 | AGCAAAA |
| ENSG00000122367 | AUCCUUU |
| ENSG00000122367 | CUUGGAG |
| ENSG00000122367 | GAAACAU |
| ENSG00000122367 | GAGGUAG |
| ENSG00000122367 | UAUAAAG |
| ENSG00000122367 | UCAUUUG |
| ENSG00000122367 | UGCAAAG |
| ENSG00000122367 | UUCUCG  |
| ENSG00000122375 | GUGACAG |
| ENSG00000122420 | AUACAAG |
| ENSG00000122420 | UCACAUU |
| ENSG00000122420 | UGAAGUG |
| ENSG00000122435 | AAAUUUC |
| ENSG00000122482 | AACAGUC |
| ENSG00000122482 | AACAUUC |
| ENSG00000122482 | AUGCACC |
| ENSG00000122482 | CAUGGAU |
| ENSG00000122482 | GAGAAAU |
| ENSG00000122482 | GAGGUAG |

|                 |          |
|-----------------|----------|
| ENSG00000122482 | GUGAGGU  |
| ENSG00000122482 | UAAUGCU  |
| ENSG00000122482 | UGUUGAA  |
| ENSG00000122482 | UCCAUUA  |
| ENSG00000122484 | CUUGGAG  |
| ENSG00000122507 | GCUUCCU  |
| ENSG00000122515 | ACUUGGA  |
| ENSG00000122515 | CAGACAG  |
| ENSG00000122515 | CUUCACC  |
| ENSG00000122515 | GGAGUCC  |
| ENSG00000122515 | GUGCUUG  |
| ENSG00000122515 | UAAUAGU  |
| ENSG00000122515 | UGUGCUU  |
| ENSG00000122545 | AACACUG  |
| ENSG00000122545 | ACAAUUA  |
| ENSG00000122545 | ACUGUGU  |
| ENSG00000122545 | AUGGCAC  |
| ENSG00000122545 | GGUGGUC  |
| ENSG00000122545 | UUGGCAA  |
| ENSG00000122547 | CAAAACU  |
| ENSG00000122547 | UCACAGU  |
| ENSG00000122547 | UUCAAAU  |
| ENSG00000122547 | UUUCAAC  |
| ENSG00000122557 | AAAGUAC  |
| ENSG00000122557 | AGCUGCC  |
| ENSG00000122557 | AGUAGUU  |
| ENSG00000122557 | AUGCAUU  |
| ENSG00000122557 | AUUCAUU  |
| ENSG00000122557 | CACUGUU  |
| ENSG00000122557 | GAGCUGC  |
| ENSG00000122565 | AAAACUG  |
| ENSG00000122565 | AAAGUAC  |
| ENSG00000122565 | AAAGUAU  |
| ENSG00000122565 | AACAUUC  |
| ENSG00000122565 | CAAAACU  |
| ENSG00000122565 | CAAAGUG  |
| ENSG00000122565 | CAA AUGC |
| ENSG00000122565 | CACCAGC  |
| ENSG00000122565 | CACUGUU  |
| ENSG00000122565 | CCAGUGC  |
| ENSG00000122565 | CUACAAA  |
| ENSG00000122565 | UACAGUU  |
| ENSG00000122565 | UCACCAC  |
| ENSG00000122566 | AAACUGU  |
| ENSG00000122566 | AAAGUAA  |
| ENSG00000122566 | AACAUUC  |
| ENSG00000122566 | AAC CUGG |
| ENSG00000122566 | AAC CUGU |
| ENSG00000122566 | ACGCACU  |
| ENSG00000122566 | ACUGCAU  |
| ENSG00000122566 | ACUGGCU  |
| ENSG00000122566 | AGCAGCA  |
| ENSG00000122566 | AUCACUA  |
| ENSG00000122566 | CUCGCUG  |
| ENSG00000122566 | CUCUGGG  |
| ENSG00000122566 | CUGCAGC  |
| ENSG00000122566 | CUGCUCA  |
| ENSG00000122566 | CUGGGCA  |
| ENSG00000122566 | GCAGCAU  |
| ENSG00000122566 | GGCUCUG  |
| ENSG00000122566 | GGUUGAC  |
| ENSG00000122566 | UAAGACU  |
| ENSG00000122566 | UCACAAG  |
| ENSG00000122566 | UGAAAUG  |



|                 |          |
|-----------------|----------|
| ENSG00000122566 | UGAGAAG  |
| ENSG00000122566 | UGAGAAU  |
| ENSG00000122566 | UGCAUUAU |
| ENSG00000122566 | UUCAAAU  |
| ENSG00000122584 | AAUCCUU  |
| ENSG00000122584 | AGCAGCA  |
| ENSG00000122584 | AGCAGCU  |
| ENSG00000122584 | AUGUGCC  |
| ENSG00000122591 | AAGUCUU  |
| ENSG00000122591 | CCUUCAU  |
| ENSG00000122591 | GGAUUUC  |
| ENSG00000122592 | CUACAAA  |
| ENSG00000122592 | GCUACAU  |
| ENSG00000122592 | GGGAGCU  |
| ENSG00000122592 | UACAAAG  |
| ENSG00000122641 | AUGGCUU  |
| ENSG00000122642 | CUCAGGG  |
| ENSG00000122643 | GAGUGUG  |
| ENSG00000122643 | GGAGUGU  |
| ENSG00000122644 | AAAGCUG  |
| ENSG00000122644 | AAGUGCA  |
| ENSG00000122644 | AGCACCA  |
| ENSG00000122644 | AGUGCAA  |
| ENSG00000122644 | AUAAAGU  |
| ENSG00000122644 | CAGGAAC  |
| ENSG00000122644 | UAUAAAG  |
| ENSG00000122644 | UGCAAAG  |
| ENSG00000122644 | UGCAUAG  |
| ENSG00000122644 | UUAGAGA  |
| ENSG00000122644 | UUCUAAU  |
| ENSG00000122691 | AUGCAUU  |
| ENSG00000122691 | AUUGCAC  |
| ENSG00000122691 | GCAGAAG  |
| ENSG00000122691 | UAUUGCU  |
| ENSG00000122691 | UGAGAAU  |
| ENSG00000122691 | UGCAUUG  |
| ENSG00000122692 | AAUUUUU  |
| ENSG00000122692 | AGUGCUG  |
| ENSG00000122692 | UGAAAUG  |
| ENSG00000122705 | AACUCUA  |
| ENSG00000122707 | AAACUGU  |
| ENSG00000122707 | AAAGUUAU |
| ENSG00000122707 | ACAUUCA  |
| ENSG00000122707 | AGCAGCG  |
| ENSG00000122707 | AGCAGCU  |
| ENSG00000122707 | GAUUGUA  |
| ENSG00000122707 | UGCAUUG  |
| ENSG00000122707 | UGUCUUU  |
| ENSG00000122707 | UGUGUGG  |
| ENSG00000122729 | AAAGGUA  |
| ENSG00000122729 | UUCAAAU  |
| ENSG00000122733 | AAGAACC  |
| ENSG00000122733 | CACAGUG  |
| ENSG00000122733 | CUUGGGC  |
| ENSG00000122733 | CUUUGGU  |
| ENSG00000122733 | GAAACAU  |
| ENSG00000122733 | GAGUUGA  |
| ENSG00000122733 | GCUUCCU  |
| ENSG00000122733 | GGAAGCC  |
| ENSG00000122733 | GGCAGGG  |
| ENSG00000122733 | GGCUCUG  |
| ENSG00000122733 | GGGGGAA  |
| ENSG00000122733 | GUGCUUG  |
| ENSG00000122733 | UAGUGAG  |

|                 |         |
|-----------------|---------|
| ENSG00000122733 | UCACAGU |
| ENSG00000122733 | UGCAGCU |
| ENSG00000122733 | UGGCUGC |
| ENSG00000122733 | UGUCUGG |
| ENSG00000122733 | UGUGCUU |
| ENSG00000122756 | AAUACUG |
| ENSG00000122756 | ACUGUGU |
| ENSG00000122756 | AGCUUAU |
| ENSG00000122756 | CUUUGGU |
| ENSG00000122756 | GAGAACC |
| ENSG00000122756 | GAGAACU |
| ENSG00000122756 | GGGCCCC |
| ENSG00000122756 | GGGCAG  |
| ENSG00000122756 | GGUGGGC |
| ENSG00000122756 | UGAAAUG |
| ENSG00000122756 | UUCAAAU |
| ENSG00000122778 | AACAGUC |
| ENSG00000122778 | AACUCUA |
| ENSG00000122778 | AAGUGCU |
| ENSG00000122778 | ACAUUCA |
| ENSG00000122778 | ACUUGGA |
| ENSG00000122778 | AGCACCA |
| ENSG00000122778 | AGCAGCA |
| ENSG00000122778 | AGCAUUC |
| ENSG00000122778 | AGUGCUG |
| ENSG00000122778 | AUGGCUU |
| ENSG00000122778 | CAAAGCA |
| ENSG00000122778 | CACAGUG |
| ENSG00000122778 | CUACAGU |
| ENSG00000122778 | CUAGUAG |
| ENSG00000122778 | CUGCUCA |
| ENSG00000122778 | CUUUGGU |
| ENSG00000122778 | GAGGCUG |
| ENSG00000122778 | GAGGUAG |
| ENSG00000122778 | GAUUGUA |
| ENSG00000122778 | GCUUCCU |
| ENSG00000122778 | UCACAGU |
| ENSG00000122778 | UCAUAGA |
| ENSG00000122778 | UCUCACC |
| ENSG00000122778 | UCUCCAA |
| ENSG00000122778 | UGAAGUG |
| ENSG00000122778 | UGCAGCU |
| ENSG00000122778 | UGCAUAG |
| ENSG00000122778 | UGCAUAU |
| ENSG00000122778 | UGUGCUU |
| ENSG00000122778 | UCCAUUA |
| ENSG00000122778 | UUGGCAA |
| ENSG00000122778 | UUGGUCC |
| ENSG00000122778 | UUGGUUC |
| ENSG00000122779 | UGUCUUU |
| ENSG00000122783 | UUGGUUC |
| ENSG00000122786 | AAGUGCA |
| ENSG00000122786 | ACUGCAU |
| ENSG00000122786 | AUGCACC |
| ENSG00000122786 | CAGUAGU |
| ENSG00000122786 | CUCUAGC |
| ENSG00000122786 | GAGGUAU |
| ENSG00000122786 | GCAGAAG |
| ENSG00000122786 | GUAAACA |
| ENSG00000122786 | GUGCAAA |
| ENSG00000122786 | UAAUAUC |
| ENSG00000122786 | UAGACUG |
| ENSG00000122786 | UCUUGAG |
| ENSG00000122786 | UGCAAAG |

|                 |         |
|-----------------|---------|
| ENSG00000122824 | AAAGAGC |
| ENSG00000122824 | AUGAGCU |
| ENSG00000122824 | GGAGGCA |
| ENSG00000122824 | GUGCUUG |
| ENSG00000122824 | UACAAAG |
| ENSG00000122824 | UGUGCUU |
| ENSG00000122824 | UUUUUGC |
| ENSG00000122861 | GAGAUGA |
| ENSG00000122862 | CUUUGGU |
| ENSG00000122863 | AAAGAGC |
| ENSG00000122863 | AAGUCAC |
| ENSG00000122863 | ACCCUGU |
| ENSG00000122863 | CAAAGCA |
| ENSG00000122863 | CCUUCUG |
| ENSG00000122863 | CUCAGGG |
| ENSG00000122863 | CUCUUC  |
| ENSG00000122863 | CUGGAAA |
| ENSG00000122863 | GAGAAGA |
| ENSG00000122863 | GAGGUAG |
| ENSG00000122863 | GAGUAU  |
| ENSG00000122863 | UCCUGAG |
| ENSG00000122863 | UGAGAAG |
| ENSG00000122863 | UGCCAGC |
| ENSG00000122863 | UGGUUAC |
| ENSG00000122863 | UUCAAAU |
| ENSG00000122863 | UUGAGGC |
| ENSG00000122870 | CUUUGGU |
| ENSG00000122877 | AAAAGUA |
| ENSG00000122877 | AAAGUAU |
| ENSG00000122877 | AAGGCAC |
| ENSG00000122877 | CUACAAA |
| ENSG00000122877 | UACAAAG |
| ENSG00000122877 | UCACACA |
| ENSG00000122884 | GAAACAU |
| ENSG00000122884 | UCCAGUU |
| ENSG00000122912 | UUGGCAA |
| ENSG00000122912 | UUGGCAC |
| ENSG00000122958 | CCAGUGC |
| ENSG00000122966 | AAAGGUA |
| ENSG00000122966 | AAAGUGC |
| ENSG00000122966 | AAGUGCA |
| ENSG00000122966 | AAUCCUU |
| ENSG00000122966 | ACUGCAG |
| ENSG00000122966 | AGUAACA |
| ENSG00000122966 | AGUGCAA |
| ENSG00000122966 | CAAAGUG |
| ENSG00000122966 | CAGCAA  |
| ENSG00000122966 | CAGCUGG |
| ENSG00000122966 | CCUGUAC |
| ENSG00000122966 | CUGCAGC |
| ENSG00000122966 | CUGCAGG |
| ENSG00000122966 | CUGGAAA |
| ENSG00000122966 | CUUCUCU |
| ENSG00000122966 | CUUGUAU |
| ENSG00000122966 | GAGCUGC |
| ENSG00000122966 | GUGCAA  |
| ENSG00000122966 | UAUAAAG |
| ENSG00000122966 | UGUUGAA |
| ENSG00000123064 | CAGGUGA |
| ENSG00000123064 | GCAGGAC |
| ENSG00000123064 | UAUUACC |
| ENSG00000123066 | AAAGUAU |
| ENSG00000123066 | AAGUCUU |
| ENSG00000123066 | AAGUGCU |

|                 |          |
|-----------------|----------|
| ENSG00000123066 | ACAAGGU  |
| ENSG00000123066 | AGUGCUU  |
| ENSG00000123066 | AUAU AAC |
| ENSG00000123066 | AUUCAUU  |
| ENSG00000123066 | CCUUCAU  |
| ENSG00000123066 | UAUAUGA  |
| ENSG00000123066 | UCAAGUA  |
| ENSG00000123066 | UCACAAG  |
| ENSG00000123066 | UGAGAAU  |
| ENSG00000123066 | UUUGCAA  |
| ENSG00000123091 | AUCCUUU  |
| ENSG00000123091 | CCAGUGU  |
| ENSG00000123091 | GGCUCAG  |
| ENSG00000123096 | CAA AUGC |
| ENSG00000123096 | GUUAAUG  |
| ENSG00000123096 | UGCAAAG  |
| ENSG00000123096 | UUUGCAA  |
| ENSG00000123104 | AAAAAUC  |
| ENSG00000123104 | CACUCCU  |
| ENSG00000123104 | CACUGUU  |
| ENSG00000123104 | GAGCUAA  |
| ENSG00000123104 | GGUUGUC  |
| ENSG00000123104 | GUGACAG  |
| ENSG00000123104 | UGAAAGG  |
| ENSG00000123104 | UGGCUGC  |
| ENSG00000123104 | UUGGCAC  |
| ENSG00000123119 | AACACUG  |
| ENSG00000123119 | CUCAAAC  |
| ENSG00000123119 | CUGGAAA  |
| ENSG00000123119 | GGAAGAC  |
| ENSG00000123119 | GGAAUGU  |
| ENSG00000123119 | GGACUGC  |
| ENSG00000123119 | UAUAAAG  |
| ENSG00000123119 | UAUAAUA  |
| ENSG00000123119 | UGGACUG  |
| ENSG00000123124 | AAAACUG  |
| ENSG00000123124 | AGCAGCA  |
| ENSG00000123124 | AGCUUAU  |
| ENSG00000123124 | GGAAGAC  |
| ENSG00000123124 | GUGCAAA  |
| ENSG00000123124 | UGCAUAG  |
| ENSG00000123124 | UUUGCAA  |
| ENSG00000123144 | AAGUGCU  |
| ENSG00000123146 | AAAGCUG  |
| ENSG00000123159 | GAGGUAG  |
| ENSG00000123159 | GAGGUAU  |
| ENSG00000123159 | GUGGGGA  |
| ENSG00000123159 | UCACAGG  |
| ENSG00000123159 | UCACAGU  |
| ENSG00000123178 | AACAGUC  |
| ENSG00000123178 | AGGACAC  |
| ENSG00000123178 | CUUACAG  |
| ENSG00000123191 | CAGGCUC  |
| ENSG00000123191 | GAGGUAG  |
| ENSG00000123191 | GAGGUAU  |
| ENSG00000123240 | ACUGUAG  |
| ENSG00000123240 | CUUUGGU  |
| ENSG00000123243 | GUCAUUG  |
| ENSG00000123243 | UACAAAG  |
| ENSG00000123268 | AACAUUC  |
| ENSG00000123268 | UCCAGUU  |
| ENSG00000123268 | UGACCUA  |
| ENSG00000123307 | UCACAGU  |
| ENSG00000123307 | UCUGGAA  |

|                 |          |
|-----------------|----------|
| ENSG00000123307 | UGCAUUAU |
| ENSG00000123307 | UGUGCUU  |
| ENSG00000123307 | UUGGCAA  |
| ENSG00000123338 | AGUGAUC  |
| ENSG00000123338 | AUGAUGC  |
| ENSG00000123338 | UAAUAUC  |
| ENSG00000123338 | UUGAUCA  |
| ENSG00000123342 | AGGGAGG  |
| ENSG00000123342 | AGUGCCU  |
| ENSG00000123342 | CUGGGCA  |
| ENSG00000123342 | CUUCUCU  |
| ENSG00000123342 | GGCAUUG  |
| ENSG00000123352 | AAUUAUU  |
| ENSG00000123352 | GAGGCAG  |
| ENSG00000123352 | GAUCAGA  |
| ENSG00000123352 | UCCAGUU  |
| ENSG00000123353 | AACUGGU  |
| ENSG00000123353 | AGCUGCC  |
| ENSG00000123353 | AUGGCUU  |
| ENSG00000123353 | GUAUGUU  |
| ENSG00000123353 | GUUCAUG  |
| ENSG00000123353 | UGAGAAG  |
| ENSG00000123353 | UGGGUGA  |
| ENSG00000123353 | UUGUUCG  |
| ENSG00000123358 | AAAUCCC  |
| ENSG00000123358 | AAGGCAC  |
| ENSG00000123360 | ACCUGGA  |
| ENSG00000123360 | ACUUGGA  |
| ENSG00000123360 | CAAAGCA  |
| ENSG00000123360 | CAA AUGC |
| ENSG00000123360 | CACAGUG  |
| ENSG00000123360 | CCUUCUU  |
| ENSG00000123360 | CUCUGGG  |
| ENSG00000123360 | CUGGGGG  |
| ENSG00000123360 | CUUGGAG  |
| ENSG00000123360 | GACCUG   |
| ENSG00000123360 | GAGCCC   |
| ENSG00000123360 | GAGGGGC  |
| ENSG00000123360 | GUGGGGA  |
| ENSG00000123360 | UAUUGCU  |
| ENSG00000123360 | UCCAGAG  |
| ENSG00000123360 | UGACAUC  |
| ENSG00000123360 | UGGGGGA  |
| ENSG00000123360 | UUGGAGG  |
| ENSG00000123364 | AAAAACC  |
| ENSG00000123364 | ACAUCAC  |
| ENSG00000123364 | ACUGUUU  |
| ENSG00000123364 | AGCACCA  |
| ENSG00000123364 | AGCAGCA  |
| ENSG00000123364 | AGCAGCG  |
| ENSG00000123364 | AGCAGCU  |
| ENSG00000123364 | CACAAUG  |
| ENSG00000123364 | CACUGUU  |
| ENSG00000123364 | GAGGCAG  |
| ENSG00000123364 | GGAUUUC  |
| ENSG00000123364 | GGAUUUU  |
| ENSG00000123364 | GUCAUUG  |
| ENSG00000123364 | UACAAAG  |
| ENSG00000123364 | UGCAUUG  |
| ENSG00000123364 | UUUGCAA  |
| ENSG00000123364 | UUUGCAC  |
| ENSG00000123364 | UUUUUGC  |
| ENSG00000123374 | AAGGUGC  |
| ENSG00000123374 | AAGUGCU  |

|                 |          |
|-----------------|----------|
| ENSG00000123374 | CCUUCUG  |
| ENSG00000123374 | UACAAAG  |
| ENSG00000123388 | ACUGCAU  |
| ENSG00000123388 | AGCAGCA  |
| ENSG00000123388 | AGGACAC  |
| ENSG00000123388 | AGGCAGG  |
| ENSG00000123388 | AUGCACC  |
| ENSG00000123388 | CACACCU  |
| ENSG00000123388 | CCCUGUC  |
| ENSG00000123388 | CUAGGCU  |
| ENSG00000123388 | GAGGUAG  |
| ENSG00000123388 | GGGGAGC  |
| ENSG00000123388 | UCACAUU  |
| ENSG00000123388 | UGCAUAG  |
| ENSG00000123388 | UUCAAAU  |
| ENSG00000123388 | UUUGCAC  |
| ENSG00000123395 | GGAGAGA  |
| ENSG00000123395 | UCCAGAG  |
| ENSG00000123411 | AAAAAUC  |
| ENSG00000123411 | AAGUCUU  |
| ENSG00000123411 | AAGUGCA  |
| ENSG00000123411 | AAUCUCA  |
| ENSG00000123411 | ACAGGUG  |
| ENSG00000123411 | AGCCAGU  |
| ENSG00000123411 | AGUGCAA  |
| ENSG00000123411 | AUUCAUU  |
| ENSG00000123411 | CCAGUAC  |
| ENSG00000123411 | CCCUGAG  |
| ENSG00000123411 | CCUGCUG  |
| ENSG00000123411 | CCUUCAU  |
| ENSG00000123411 | CUUACAG  |
| ENSG00000123411 | CUUUGGU  |
| ENSG00000123411 | GACCCUG  |
| ENSG00000123411 | GAGGUAU  |
| ENSG00000123411 | GCUACAU  |
| ENSG00000123411 | GGGUUUA  |
| ENSG00000123411 | GUCUCUG  |
| ENSG00000123411 | GUGGCCC  |
| ENSG00000123411 | UACAGUU  |
| ENSG00000123411 | UAUUGCU  |
| ENSG00000123411 | UCCAGAG  |
| ENSG00000123411 | UUGGUUC  |
| ENSG00000123411 | UUGUUCG  |
| ENSG00000123444 | UUCUGCA  |
| ENSG00000123454 | GGUGGGC  |
| ENSG00000123454 | UCCCUUU  |
| ENSG00000123472 | AAGUCUU  |
| ENSG00000123472 | AGCUUAU  |
| ENSG00000123472 | CACAGUG  |
| ENSG00000123472 | GAGGUAU  |
| ENSG00000123472 | GGCAGGG  |
| ENSG00000123472 | UCACAGU  |
| ENSG00000123472 | UUCAAGC  |
| ENSG00000123505 | AGCAUUC  |
| ENSG00000123505 | AUAAUAC  |
| ENSG00000123505 | CACCACC  |
| ENSG00000123505 | GAAGGAA  |
| ENSG00000123505 | UCACAGG  |
| ENSG00000123505 | UCACAGU  |
| ENSG00000123505 | UGAGGAC  |
| ENSG00000123505 | UGUCUGC  |
| ENSG00000123505 | UGUCUGG  |
| ENSG00000123505 | UUUGC GA |
| ENSG00000123505 | UUUUUGC  |

|                 |          |
|-----------------|----------|
| ENSG00000123552 | AAGGCAC  |
| ENSG00000123552 | CCCUGAG  |
| ENSG00000123552 | GCAGAAG  |
| ENSG00000123552 | UCACAGG  |
| ENSG00000123552 | UCACAGU  |
| ENSG00000123552 | UCCUGAG  |
| ENSG00000123552 | UCUGGAA  |
| ENSG00000123560 | AGCACCA  |
| ENSG00000123560 | AUCCUUG  |
| ENSG00000123560 | CAGUGCA  |
| ENSG00000123560 | GCACCAU  |
| ENSG00000123560 | UAUAAAAG |
| ENSG00000123560 | UCCUUGC  |
| ENSG00000123562 | AAAAACC  |
| ENSG00000123562 | CCUUCAU  |
| ENSG00000123562 | GCACCAU  |
| ENSG00000123562 | UUGGCAA  |
| ENSG00000123572 | ACAGUAU  |
| ENSG00000123572 | ACAUUAC  |
| ENSG00000123572 | AGGUAGU  |
| ENSG00000123572 | AGUAACA  |
| ENSG00000123572 | CACAGUG  |
| ENSG00000123572 | CUCCAUI  |
| ENSG00000123572 | GAGGUAG  |
| ENSG00000123572 | GAGGUAU  |
| ENSG00000123572 | GUAACA   |
| ENSG00000123572 | GUGUCAC  |
| ENSG00000123572 | GUUAGGA  |
| ENSG00000123572 | UAGAGGA  |
| ENSG00000123572 | UCACAGG  |
| ENSG00000123572 | UCACAUU  |
| ENSG00000123572 | UGAGGAC  |
| ENSG00000123572 | UGUGUCA  |
| ENSG00000123572 | UUAGGAU  |
| ENSG00000123576 | AAAACUG  |
| ENSG00000123600 | AAACUGU  |
| ENSG00000123600 | AAAGAGG  |
| ENSG00000123600 | AAAGGUA  |
| ENSG00000123600 | AAAUCCC  |
| ENSG00000123600 | AAUUAUU  |
| ENSG00000123600 | ACAGUAC  |
| ENSG00000123600 | ACUGCAG  |
| ENSG00000123600 | ACUGCAU  |
| ENSG00000123600 | AGAUAAA  |
| ENSG00000123600 | AGUAACA  |
| ENSG00000123600 | AGUGGUU  |
| ENSG00000123600 | CAAAACU  |
| ENSG00000123600 | CAGUCCA  |
| ENSG00000123600 | CUGUUGA  |
| ENSG00000123600 | GCUUCCU  |
| ENSG00000123600 | GGCAUUG  |
| ENSG00000123600 | GGGAGCU  |
| ENSG00000123600 | GGGUCUU  |
| ENSG00000123600 | GGGUGUU  |
| ENSG00000123600 | GGUUGAC  |
| ENSG00000123600 | GGUUGUC  |
| ENSG00000123600 | GUCAUUG  |
| ENSG00000123600 | GUGAGGU  |
| ENSG00000123600 | GUGCCAC  |
| ENSG00000123600 | GUGUCAC  |
| ENSG00000123600 | UCAACAG  |
| ENSG00000123600 | UCACAAG  |
| ENSG00000123600 | UCAUACA  |
| ENSG00000123600 | UCAUUCG  |

|                 |         |
|-----------------|---------|
| ENSG00000123600 | UCUGGAG |
| ENSG00000123600 | UGAAAUG |
| ENSG00000123600 | UGCUGAC |
| ENSG00000123600 | UGUGUCA |
| ENSG00000123600 | UUGGCAA |
| ENSG00000123600 | UUGGCAC |
| ENSG00000123600 | UUGGUUC |
| ENSG00000123600 | UUGUGUC |
| ENSG00000123607 | GCUGGAU |
| ENSG00000123612 | AAGUGCA |
| ENSG00000123612 | ACAGUAC |
| ENSG00000123612 | ACUGUAG |
| ENSG00000123612 | AGGACAC |
| ENSG00000123612 | AGGCAGG |
| ENSG00000123612 | AGUGCUU |
| ENSG00000123612 | CAAGAGC |
| ENSG00000123612 | CACAGUG |
| ENSG00000123612 | CCCUGAG |
| ENSG00000123612 | CUUUGGU |
| ENSG00000123612 | GAGGUAU |
| ENSG00000123612 | GUGACAG |
| ENSG00000123612 | UAUUGCU |
| ENSG00000123612 | UCAUACA |
| ENSG00000123612 | UCAUUCG |
| ENSG00000123612 | UCUAGAG |
| ENSG00000123612 | UGACAUC |
| ENSG00000123612 | UGCAAAG |
| ENSG00000123612 | UCCAUUA |
| ENSG00000123612 | UUGGUUC |
| ENSG00000123636 | AACAAAC |
| ENSG00000123636 | AACAUUC |
| ENSG00000123636 | AACUACU |
| ENSG00000123636 | AAGGCAC |
| ENSG00000123636 | AAUACUG |
| ENSG00000123636 | ACAAUAU |
| ENSG00000123636 | ACAGUAC |
| ENSG00000123636 | ACCCUGU |
| ENSG00000123636 | ACUGUAG |
| ENSG00000123636 | AGGCAGG |
| ENSG00000123636 | AGUGGUU |
| ENSG00000123636 | CAGUAGA |
| ENSG00000123636 | CAGUGCA |
| ENSG00000123636 | CAUGGAU |
| ENSG00000123636 | CCCUGUC |
| ENSG00000123636 | CUACAAA |
| ENSG00000123636 | CUUGUAU |
| ENSG00000123636 | GAGAACC |
| ENSG00000123636 | GAGGAUA |
| ENSG00000123636 | GCAGCAU |
| ENSG00000123636 | GCUGGUG |
| ENSG00000123636 | GUGCCAC |
| ENSG00000123636 | UAGAGGA |
| ENSG00000123636 | UCACAGG |
| ENSG00000123636 | UCACAGU |
| ENSG00000123636 | UGGGUGA |
| ENSG00000123636 | UGUGCUU |
| ENSG00000123636 | UUCAAGC |
| ENSG00000123636 | UUUCAAC |
| ENSG00000123643 | AGCACCA |
| ENSG00000123643 | AUAAAGU |
| ENSG00000123643 | CUUUGGU |
| ENSG00000123643 | GAGGCAG |
| ENSG00000123643 | GAUUGUA |
| ENSG00000123643 | GGAGGAG |



|                 |         |
|-----------------|---------|
| ENSG00000123643 | GGCUCUG |
| ENSG00000123643 | GGGGAGC |
| ENSG00000123684 | AAAGUGC |
| ENSG00000123684 | AAGUGCA |
| ENSG00000123684 | AUUCAUU |
| ENSG00000123684 | GAGGUAG |
| ENSG00000123684 | GAUUGUC |
| ENSG00000123684 | GCAACUU |
| ENSG00000123684 | GGUUUAC |
| ENSG00000123684 | GUGCAA  |
| ENSG00000123684 | UACAAAG |
| ENSG00000123684 | UCCACA  |
| ENSG00000123684 | UGCAUAG |
| ENSG00000123684 | UUGGUCC |
| ENSG00000123684 | UUGGUUC |
| ENSG00000123689 | AGCAAAA |
| ENSG00000123689 | AGCAGCA |
| ENSG00000123689 | CAGCAA  |
| ENSG00000123689 | UUCAAAU |
| ENSG00000123700 | AAGGCAC |
| ENSG00000123700 | AGCAGCG |
| ENSG00000123700 | GAUUGUC |
| ENSG00000123700 | GGAAUGU |
| ENSG00000123700 | GGCUCAG |
| ENSG00000123700 | UUGGUUC |
| ENSG00000123728 | AAAGCUG |
| ENSG00000123728 | AGCAGCA |
| ENSG00000123728 | CAAAGCA |
| ENSG00000123728 | CCUGCUG |
| ENSG00000123728 | CUUUGGU |
| ENSG00000123728 | GAGCUGC |
| ENSG00000123728 | GCAGCAU |
| ENSG00000123728 | GGCUCAG |
| ENSG00000123728 | GGUUUAC |
| ENSG00000123728 | UAAUACA |
| ENSG00000123836 | CACCACC |
| ENSG00000123836 | GGAAUGU |
| ENSG00000123836 | GGCAGGG |
| ENSG00000123836 | GGGUCUU |
| ENSG00000123836 | UACAGUU |
| ENSG00000123836 | UAGUGAG |
| ENSG00000123836 | UGCUGAC |
| ENSG00000123836 | UUGGCAA |
| ENSG00000123892 | AACACUG |
| ENSG00000123908 | ACAUUAC |
| ENSG00000123908 | AUGGCAC |
| ENSG00000123908 | CCCUGAG |
| ENSG00000123908 | GAUUGUA |
| ENSG00000123908 | GGACGGA |
| ENSG00000123933 | AAGGCAC |
| ENSG00000123933 | AAUACUG |
| ENSG00000123933 | AGGCAGG |
| ENSG00000123933 | AUAUUAU |
| ENSG00000123933 | AUGGCAC |
| ENSG00000123933 | CACUCCU |
| ENSG00000123933 | CAGCAA  |
| ENSG00000123933 | CCCACCG |
| ENSG00000123933 | CCCACCU |
| ENSG00000123933 | CCCUGAG |
| ENSG00000123933 | CUCCAC  |
| ENSG00000123933 | GAGACGC |
| ENSG00000123933 | GAGCUGC |
| ENSG00000123933 | GAGGGGC |
| ENSG00000123933 | GCUGGUG |

|                 |          |
|-----------------|----------|
| ENSG00000123933 | GGAAUGU  |
| ENSG00000123933 | UAAUACA  |
| ENSG00000123933 | UCCCACC  |
| ENSG00000123933 | UGCUCAC  |
| ENSG00000123983 | AAAAACC  |
| ENSG00000123983 | AAAUGGU  |
| ENSG00000123983 | AAUCACU  |
| ENSG00000123983 | AAUCCUU  |
| ENSG00000123983 | ACUGUAG  |
| ENSG00000123983 | AGCAAAA  |
| ENSG00000123983 | AUCCCUU  |
| ENSG00000123983 | CACUGUU  |
| ENSG00000123983 | CAGUUAC  |
| ENSG00000123983 | CUCAAAC  |
| ENSG00000123983 | GUGCAAA  |
| ENSG00000123983 | UGAAAUG  |
| ENSG00000123983 | UGAGAAG  |
| ENSG00000123983 | UUCAAGC  |
| ENSG00000123983 | UUGAUCA  |
| ENSG00000123983 | UUGUUCG  |
| ENSG00000123989 | AGCAGCG  |
| ENSG00000123992 | AAGUCUU  |
| ENSG00000123992 | CAGCUGG  |
| ENSG00000123992 | UCUCCAA  |
| ENSG00000124067 | CACAAUG  |
| ENSG00000124074 | CCUUCUG  |
| ENSG00000124074 | UGGCCCU  |
| ENSG00000124092 | AUUCAUU  |
| ENSG00000124098 | CCUGAG   |
| ENSG00000124098 | CUGGCUC  |
| ENSG00000124098 | GGAAUGU  |
| ENSG00000124098 | GGCUCAG  |
| ENSG00000124098 | UCACAUU  |
| ENSG00000124098 | UCCCUGU  |
| ENSG00000124098 | UUCUGCA  |
| ENSG00000124104 | AAAGUGC  |
| ENSG00000124104 | AAGUGCU  |
| ENSG00000124104 | AGUGCUU  |
| ENSG00000124104 | CUGGAAA  |
| ENSG00000124104 | GAGAACU  |
| ENSG00000124104 | GGGGCAG  |
| ENSG00000124104 | UCUGGAA  |
| ENSG00000124104 | UUGAGGC  |
| ENSG00000124120 | AACAAAC  |
| ENSG00000124120 | AACCUGG  |
| ENSG00000124120 | AAGUGCU  |
| ENSG00000124120 | AUUGCAC  |
| ENSG00000124120 | GAGAACC  |
| ENSG00000124120 | GAGAACU  |
| ENSG00000124120 | GGAAUGU  |
| ENSG00000124120 | UCCAGAG  |
| ENSG00000124120 | UGAAGCU  |
| ENSG00000124120 | UUGGCAC  |
| ENSG00000124126 | AAAGUGC  |
| ENSG00000124126 | AAGUGCA  |
| ENSG00000124126 | AGUAGAC  |
| ENSG00000124126 | AUAAAGU  |
| ENSG00000124126 | AUAU AAC |
| ENSG00000124126 | CCAGUGC  |
| ENSG00000124126 | GGAAUGU  |
| ENSG00000124126 | UUGGUCC  |
| ENSG00000124126 | UUUCAAC  |
| ENSG00000124134 | CUCAGGG  |
| ENSG00000124140 | AAACGGU  |

|                 |          |
|-----------------|----------|
| ENSG00000124140 | AAAUGGU  |
| ENSG00000124140 | AACAAAC  |
| ENSG00000124140 | AACGGAA  |
| ENSG00000124140 | AAGAACC  |
| ENSG00000124140 | AAGGCAC  |
| ENSG00000124140 | AAGUCAC  |
| ENSG00000124140 | AAUACUG  |
| ENSG00000124140 | AAUUAUU  |
| ENSG00000124140 | ACAUUCA  |
| ENSG00000124140 | AGCAUUC  |
| ENSG00000124140 | AGUGCAA  |
| ENSG00000124140 | AGUGCCU  |
| ENSG00000124140 | AUAAAAGU |
| ENSG00000124140 | AUAAUAC  |
| ENSG00000124140 | CCCCCAG  |
| ENSG00000124140 | CCUGUAC  |
| ENSG00000124140 | CUACAGU  |
| ENSG00000124140 | CUGCAGC  |
| ENSG00000124140 | CUUUGGU  |
| ENSG00000124140 | GCAACUU  |
| ENSG00000124140 | GCCUGU   |
| ENSG00000124140 | GGAGAGA  |
| ENSG00000124140 | GGGAGCU  |
| ENSG00000124140 | GUGAGGU  |
| ENSG00000124140 | GUGCCUG  |
| ENSG00000124140 | UAUAAUA  |
| ENSG00000124140 | UAUUGCU  |
| ENSG00000124140 | UCAACAG  |
| ENSG00000124140 | UCAACGG  |
| ENSG00000124140 | UGAAAUG  |
| ENSG00000124140 | UUUGCAA  |
| ENSG00000124145 | AAGGCAC  |
| ENSG00000124145 | AAGUCAC  |
| ENSG00000124145 | AGUAACA  |
| ENSG00000124145 | CUCCAGC  |
| ENSG00000124145 | CUUCUCU  |
| ENSG00000124145 | GUAACAG  |
| ENSG00000124145 | GUAGUGU  |
| ENSG00000124151 | AAAAGUA  |
| ENSG00000124151 | AACAAAC  |
| ENSG00000124151 | AAGUGCA  |
| ENSG00000124151 | AAGUGCU  |
| ENSG00000124151 | AGCAAAA  |
| ENSG00000124151 | AGCACCA  |
| ENSG00000124151 | AGUGCAA  |
| ENSG00000124151 | AGUGCUU  |
| ENSG00000124151 | AUAAAAGU |
| ENSG00000124151 | AUUGCAC  |
| ENSG00000124151 | CAAAGUG  |
| ENSG00000124151 | CUACAAA  |
| ENSG00000124151 | CUUUGGU  |
| ENSG00000124151 | GUAAACA  |
| ENSG00000124151 | UAAUACA  |
| ENSG00000124151 | UCACAAG  |
| ENSG00000124151 | UGACCUA  |
| ENSG00000124151 | UGCAUUG  |
| ENSG00000124151 | UUCUUGU  |
| ENSG00000124160 | CACAGUG  |
| ENSG00000124160 | CCUGCUG  |
| ENSG00000124160 | CUCCAUU  |
| ENSG00000124160 | CUGCUCA  |
| ENSG00000124160 | GGAGGAG  |
| ENSG00000124160 | UCACAGU  |
| ENSG00000124164 | AAAUUUC  |

|                 |         |
|-----------------|---------|
| ENSG00000124164 | ACAUAGA |
| ENSG00000124164 | AGCAGCA |
| ENSG00000124164 | AUCAUAC |
| ENSG00000124164 | GAUAUGU |
| ENSG00000124164 | GCUACAU |
| ENSG00000124164 | GGCAAGA |
| ENSG00000124164 | GUCAUUG |
| ENSG00000124164 | GUGACAG |
| ENSG00000124164 | UCACAGU |
| ENSG00000124164 | UGACUGU |
| ENSG00000124164 | UGUGUGG |
| ENSG00000124164 | UUGGUCC |
| ENSG00000124164 | UUGUGUC |
| ENSG00000124171 | AAAACUG |
| ENSG00000124171 | AAAGCUG |
| ENSG00000124171 | AAAGUAU |
| ENSG00000124171 | AAAUUUC |
| ENSG00000124171 | AAGUGCA |
| ENSG00000124171 | AGCAGCA |
| ENSG00000124171 | AGCAGCG |
| ENSG00000124171 | AGGCAGG |
| ENSG00000124171 | AGGUAGU |
| ENSG00000124171 | AGUGGUU |
| ENSG00000124171 | AGUGUGC |
| ENSG00000124171 | AUAAUAC |
| ENSG00000124171 | CACAGUG |
| ENSG00000124171 | CCUUCAU |
| ENSG00000124171 | GAGGUAU |
| ENSG00000124171 | GCACCAU |
| ENSG00000124171 | GCAGGUU |
| ENSG00000124171 | GGCAGUG |
| ENSG00000124171 | GGCUCUG |
| ENSG00000124171 | GUAGUGU |
| ENSG00000124171 | UAGUGAG |
| ENSG00000124177 | AGCAGCA |
| ENSG00000124177 | GACCCUG |
| ENSG00000124177 | GCAGCAU |
| ENSG00000124177 | UAGGGCC |
| ENSG00000124177 | UGUAUAA |
| ENSG00000124177 | UGUGCUU |
| ENSG00000124181 | AAAGCUG |
| ENSG00000124181 | AAGAACC |
| ENSG00000124181 | AUAAUAC |
| ENSG00000124181 | AUGGCUU |
| ENSG00000124181 | CUUCUCU |
| ENSG00000124181 | GAGGCAG |
| ENSG00000124181 | GGCAGUG |
| ENSG00000124181 | GUAAACA |
| ENSG00000124181 | UGUGCUU |
| ENSG00000124181 | UUGGCAA |
| ENSG00000124181 | UUGGCAC |
| ENSG00000124181 | UUUUUGC |
| ENSG00000124193 | CAAAGUG |
| ENSG00000124193 | GCUGGUG |
| ENSG00000124193 | GGGUCUU |
| ENSG00000124193 | UAUAAAG |
| ENSG00000124193 | UAUUGCU |
| ENSG00000124193 | UGACCUA |
| ENSG00000124193 | UCCAUU  |
| ENSG00000124193 | UUGGCAC |
| ENSG00000124194 | AAGGCAC |
| ENSG00000124194 | CCAGGAG |
| ENSG00000124194 | GGAAUGU |
| ENSG00000124194 | UCACACA |

|                 |          |
|-----------------|----------|
| ENSG00000124198 | AAGGCAC  |
| ENSG00000124198 | ACUGCAG  |
| ENSG00000124198 | AGCACCA  |
| ENSG00000124198 | AUAU AAC |
| ENSG00000124198 | AUUGCAC  |
| ENSG00000124198 | CAUAUUG  |
| ENSG00000124198 | CUAUACA  |
| ENSG00000124198 | UCUCAAG  |
| ENSG00000124198 | UGACAUC  |
| ENSG00000124201 | AGUGCUU  |
| ENSG00000124201 | CUUGUGU  |
| ENSG00000124201 | GCAG AAG |
| ENSG00000124201 | GGAAGCC  |
| ENSG00000124201 | GGACCUG  |
| ENSG00000124201 | UCUGGAA  |
| ENSG00000124201 | UGUGCUU  |
| ENSG00000124201 | UUCUUGU  |
| ENSG00000124203 | AAUUGC U |
| ENSG00000124203 | ACAAUAU  |
| ENSG00000124203 | AGCAGCA  |
| ENSG00000124203 | AGUAACA  |
| ENSG00000124203 | AUGACAC  |
| ENSG00000124203 | CAGCAA A |
| ENSG00000124203 | GGUUACC  |
| ENSG00000124203 | UGUCUGG  |
| ENSG00000124203 | UUGGCAC  |
| ENSG00000124205 | CACAAUG  |
| ENSG00000124205 | CUUCUCU  |
| ENSG00000124205 | UCACAAG  |
| ENSG00000124205 | UGGGAUC  |
| ENSG00000124208 | ACUGUGU  |
| ENSG00000124208 | AGAUGUG  |
| ENSG00000124208 | AGUGGUU  |
| ENSG00000124208 | AUGUGCC  |
| ENSG00000124208 | CACAGUG  |
| ENSG00000124208 | UCACAGG  |
| ENSG00000124209 | AAAGAGC  |
| ENSG00000124209 | AAGGUGC  |
| ENSG00000124209 | AAGUCU U |
| ENSG00000124209 | ACUCAGG  |
| ENSG00000124209 | AGCAUUC  |
| ENSG00000124209 | CAGGAAC  |
| ENSG00000124209 | CCAUUAC  |
| ENSG00000124209 | CCCUGAG  |
| ENSG00000124209 | CUACAAA  |
| ENSG00000124209 | CUGGGCA  |
| ENSG00000124209 | CUUGUAU  |
| ENSG00000124209 | GAGGUAG  |
| ENSG00000124209 | GCACCAU  |
| ENSG00000124209 | GCCUGGA  |
| ENSG00000124209 | GCCUGGG  |
| ENSG00000124209 | GCUACAU  |
| ENSG00000124209 | GCUGGUG  |
| ENSG00000124209 | GUCUACU  |
| ENSG00000124209 | UAAGACG  |
| ENSG00000124209 | UAAGACU  |
| ENSG00000124209 | UCCAGAG  |
| ENSG00000124209 | UCCUGAG  |
| ENSG00000124209 | UCUGGAG  |
| ENSG00000124209 | UGCAAAG  |
| ENSG00000124209 | UCCUAG   |
| ENSG00000124209 | UUGAUCA  |
| ENSG00000124209 | UUGGCAA  |
| ENSG00000124212 | CAGCUGG  |

|                 |         |
|-----------------|---------|
| ENSG00000124212 | CAGGUGA |
| ENSG00000124212 | CUCCAC  |
| ENSG00000124212 | CUGGCUC |
| ENSG00000124212 | GCCUGGA |
| ENSG00000124212 | GCCUGGG |
| ENSG00000124212 | GGAAGCC |
| ENSG00000124212 | GGGUUUA |
| ENSG00000124212 | GUGCCUG |
| ENSG00000124212 | GUGUGGC |
| ENSG00000124212 | UCCUGU  |
| ENSG00000124212 | UCCCUUG |
| ENSG00000124212 | UCCCUUU |
| ENSG00000124212 | UGCCAGC |
| ENSG00000124212 | UUCUGCA |
| ENSG00000124214 | AUGUAAU |
| ENSG00000124214 | CACUGUU |
| ENSG00000124214 | GGGGAGC |
| ENSG00000124214 | GUCCAGA |
| ENSG00000124216 | ACAGGUG |
| ENSG00000124216 | AUUGCAC |
| ENSG00000124216 | CACAGUG |
| ENSG00000124216 | UCACAGU |
| ENSG00000124216 | UGCAUUA |
| ENSG00000124217 | CAAAGCA |
| ENSG00000124217 | UUGAGGC |
| ENSG00000124222 | AGCACCA |
| ENSG00000124222 | AGUGCUU |
| ENSG00000124222 | CAAAACU |
| ENSG00000124222 | CUUGUGU |
| ENSG00000124222 | GCACCAU |
| ENSG00000124222 | GUGACUG |
| ENSG00000124222 | GUGUCAC |
| ENSG00000124222 | UCACAGG |
| ENSG00000124222 | UGAAAUG |
| ENSG00000124222 | UGAAGCU |
| ENSG00000124222 | UUGGUUC |
| ENSG00000124225 | AAAACUG |
| ENSG00000124225 | AAACUGU |
| ENSG00000124225 | AAAGAAU |
| ENSG00000124225 | AAAGUUU |
| ENSG00000124225 | AAGGCAC |
| ENSG00000124225 | ACACACC |
| ENSG00000124225 | ACUCAA  |
| ENSG00000124225 | AGCAUUC |
| ENSG00000124225 | AGCCCUU |
| ENSG00000124225 | AGGCAGG |
| ENSG00000124225 | AUAUUAU |
| ENSG00000124225 | AUGUCUG |
| ENSG00000124225 | CAAAACU |
| ENSG00000124225 | CAAGAGC |
| ENSG00000124225 | CCUUCUG |
| ENSG00000124225 | GAAUUGU |
| ENSG00000124225 | GUAACAG |
| ENSG00000124225 | UAAUAGU |
| ENSG00000124225 | UACAGUU |
| ENSG00000124225 | UAUUGCU |
| ENSG00000124225 | UGUCUUU |
| ENSG00000124225 | UUCUAAU |
| ENSG00000124225 | UUGGCAC |
| ENSG00000124225 | UUUGCAC |
| ENSG00000124226 | AAGGCAC |
| ENSG00000124226 | AAGUGCA |
| ENSG00000124226 | CCCUGUC |
| ENSG00000124226 | GGAAGCC |

|                 |         |
|-----------------|---------|
| ENSG00000124226 | UAAGACU |
| ENSG00000124226 | UCUGGAG |
| ENSG00000124228 | CACAGGG |
| ENSG00000124228 | GACUUCC |
| ENSG00000124228 | UCCACA  |
| ENSG00000124228 | UCCACC  |
| ENSG00000124243 | UCUCAA  |
| ENSG00000124243 | UUGACAC |
| ENSG00000124302 | CUGGAAA |
| ENSG00000124302 | GUGCUUG |
| ENSG00000124302 | UCUGGAA |
| ENSG00000124302 | UGUGCUU |
| ENSG00000124313 | AAGUGCA |
| ENSG00000124313 | ACAAGGU |
| ENSG00000124313 | ACAUUCA |
| ENSG00000124313 | ACUGCAG |
| ENSG00000124313 | AGGAGCU |
| ENSG00000124313 | AGGCAGG |
| ENSG00000124313 | AUAAUAC |
| ENSG00000124313 | AUGGCUU |
| ENSG00000124313 | CUCCAUI |
| ENSG00000124313 | CUCCAC  |
| ENSG00000124313 | CUGGACU |
| ENSG00000124313 | CUGGCUC |
| ENSG00000124313 | GAGCCCC |
| ENSG00000124313 | GCCUGAU |
| ENSG00000124313 | GGAGAGA |
| ENSG00000124313 | GGCAAGA |
| ENSG00000124313 | GUGUGGC |
| ENSG00000124313 | UGCAUUG |
| ENSG00000124313 | UGAUCA  |
| ENSG00000124333 | AAGGCAC |
| ENSG00000124333 | AAUUAUU |
| ENSG00000124333 | AGCAGCA |
| ENSG00000124356 | AUGGCUU |
| ENSG00000124356 | CUACAGU |
| ENSG00000124356 | UUCAAAU |
| ENSG00000124374 | AAAGUAA |
| ENSG00000124374 | AGAUGUG |
| ENSG00000124374 | CACAGUG |
| ENSG00000124374 | CUCAAAC |
| ENSG00000124374 | GCUUCCU |
| ENSG00000124374 | UCACACA |
| ENSG00000124374 | UCACAGU |
| ENSG00000124374 | UUGGUUC |
| ENSG00000124406 | AAGGUGC |
| ENSG00000124406 | ACAGUAU |
| ENSG00000124406 | AGCAUUC |
| ENSG00000124406 | AGUGCUU |
| ENSG00000124406 | AUGAGCU |
| ENSG00000124406 | AUGCAUU |
| ENSG00000124406 | AUGUCUG |
| ENSG00000124406 | CACAAUG |
| ENSG00000124406 | CAGCAGA |
| ENSG00000124406 | CUGUUGA |
| ENSG00000124406 | CUUUGGU |
| ENSG00000124406 | GAAUUGU |
| ENSG00000124406 | UCACAAG |
| ENSG00000124406 | UCCUGAG |
| ENSG00000124406 | UGCAGCU |
| ENSG00000124406 | UGCAUUG |
| ENSG00000124406 | UGUUGAA |
| ENSG00000124406 | UUGGCAC |
| ENSG00000124422 | CAGCAGA |

|                 |         |
|-----------------|---------|
| ENSG00000124429 | UGAAAGG |
| ENSG00000124440 | AGUGCCU |
| ENSG00000124440 | GAGCCC  |
| ENSG00000124440 | GAGGUAU |
| ENSG00000124440 | GAGUGUG |
| ENSG00000124440 | GCACCAU |
| ENSG00000124440 | GGAGAGA |
| ENSG00000124440 | GGAGUGU |
| ENSG00000124440 | UAUGGUU |
| ENSG00000124440 | UCCUGAG |
| ENSG00000124440 | UCUAGAG |
| ENSG00000124440 | UGGCUGC |
| ENSG00000124459 | CUUCUCU |
| ENSG00000124466 | CACAGUG |
| ENSG00000124466 | CAGCAGA |
| ENSG00000124466 | CAGUCCA |
| ENSG00000124466 | GUGCCAC |
| ENSG00000124466 | UCACAGU |
| ENSG00000124479 | AACUCUA |
| ENSG00000124479 | CAGUGCA |
| ENSG00000124486 | AAAAGUA |
| ENSG00000124486 | AAAGUAC |
| ENSG00000124486 | AACACUG |
| ENSG00000124486 | AAGACAU |
| ENSG00000124486 | ACAUUCA |
| ENSG00000124486 | ACCACAG |
| ENSG00000124486 | ACUGCAG |
| ENSG00000124486 | AGCCAGU |
| ENSG00000124486 | AGUAGUU |
| ENSG00000124486 | CAGUAGU |
| ENSG00000124486 | CUAUACA |
| ENSG00000124486 | CUGCAGC |
| ENSG00000124486 | GAAUUGU |
| ENSG00000124486 | GACUICC |
| ENSG00000124486 | GAGGCAG |
| ENSG00000124486 | GCCUGGG |
| ENSG00000124486 | GGACUGC |
| ENSG00000124486 | GUGAAUG |
| ENSG00000124486 | UAUUACC |
| ENSG00000124486 | UUGGUUC |
| ENSG00000124486 | UUGUGAC |
| ENSG00000124491 | AAAGCUG |
| ENSG00000124491 | CAAGAGC |
| ENSG00000124491 | CUGCAGG |
| ENSG00000124491 | GGCAGGG |
| ENSG00000124491 | UAAUGCU |
| ENSG00000124491 | UUGGCAC |
| ENSG00000124491 | UUUGCAA |
| ENSG00000124493 | AAAAACC |
| ENSG00000124493 | ACACACU |
| ENSG00000124493 | AGCACCA |
| ENSG00000124493 | GGCCUG  |
| ENSG00000124493 | UUUGCAC |
| ENSG00000124493 | UUUUUGC |
| ENSG00000124507 | AACUCUA |
| ENSG00000124507 | ACAGGUG |
| ENSG00000124507 | ACCACAG |
| ENSG00000124507 | ACCAGCA |
| ENSG00000124507 | AUACCUC |
| ENSG00000124507 | CAAUUGC |
| ENSG00000124507 | CACCAGC |
| ENSG00000124507 | CUGGAAA |
| ENSG00000124507 | CUUUGGU |
| ENSG00000124507 | GAGACCU |



|                 |         |
|-----------------|---------|
| ENSG00000124507 | GCAGCAU |
| ENSG00000124507 | GCCUGGG |
| ENSG00000124507 | GGGGAGC |
| ENSG00000124507 | UCUGGAA |
| ENSG00000124507 | UGCAUUG |
| ENSG00000124507 | UGCUGAC |
| ENSG00000124507 | UUGUUCG |
| ENSG00000124523 | AAAGAAU |
| ENSG00000124529 | GGCCUG  |
| ENSG00000124535 | GUGCAA  |
| ENSG00000124571 | AAAAAUC |
| ENSG00000124571 | AAAUUUC |
| ENSG00000124571 | AAGGCAC |
| ENSG00000124571 | AAGUCAC |
| ENSG00000124571 | ACCUGGA |
| ENSG00000124571 | AGGAUGU |
| ENSG00000124571 | CUGGACU |
| ENSG00000124571 | GAGAUGA |
| ENSG00000124571 | GGCAGUG |
| ENSG00000124571 | GUGAGGU |
| ENSG00000124571 | GUGCCUG |
| ENSG00000124571 | UGUGCUU |
| ENSG00000124574 | AUAUUAU |
| ENSG00000124575 | AAAGAGC |
| ENSG00000124593 | AGCUGCC |
| ENSG00000124593 | CAGCAA  |
| ENSG00000124593 | CCCACGU |
| ENSG00000124593 | CCCCUGG |
| ENSG00000124593 | GGAAGCC |
| ENSG00000124593 | GGUAGAC |
| ENSG00000124593 | UCCCUCU |
| ENSG00000124608 | CUGGCUC |
| ENSG00000124608 | GGCUCAG |
| ENSG00000124610 | AAAGAGC |
| ENSG00000124615 | GAGAAGA |
| ENSG00000124615 | UGAGAAG |
| ENSG00000124635 | AAAGAGC |
| ENSG00000124635 | GGCUCUG |
| ENSG00000124641 | GGCAGGG |
| ENSG00000124693 | AAAGAGC |
| ENSG00000124693 | GGGUGGU |
| ENSG00000124701 | CAGCAGG |
| ENSG00000124701 | GUCUCUG |
| ENSG00000124702 | AGCACCA |
| ENSG00000124702 | CAGCAGG |
| ENSG00000124702 | GAGGUAU |
| ENSG00000124702 | UAUAAAG |
| ENSG00000124721 | AAAGUUU |
| ENSG00000124743 | AUUGCAC |
| ENSG00000124743 | CACAGUG |
| ENSG00000124743 | GAGUCUU |
| ENSG00000124743 | GCUUCCU |
| ENSG00000124743 | UCACAGG |
| ENSG00000124743 | UCACAGU |
| ENSG00000124743 | UGAGUCU |
| ENSG00000124743 | UGGCCAC |
| ENSG00000124749 | ACUGCAU |
| ENSG00000124749 | GCACCAU |
| ENSG00000124749 | UCACAGG |
| ENSG00000124749 | UUCAAGC |
| ENSG00000124762 | AACAGUC |
| ENSG00000124762 | AAGUGCA |
| ENSG00000124762 | AGCUGCC |
| ENSG00000124762 | AGUGCAA |

|                 |         |
|-----------------|---------|
| ENSG00000124762 | CCUGCUG |
| ENSG00000124762 | GAGCUGC |
| ENSG00000124762 | GAGGUAG |
| ENSG00000124766 | AAAAGUA |
| ENSG00000124766 | AAAGCUG |
| ENSG00000124766 | AAAGUGC |
| ENSG00000124766 | AACAGUC |
| ENSG00000124766 | AACUCUA |
| ENSG00000124766 | AAGUGCA |
| ENSG00000124766 | AAUCCUU |
| ENSG00000124766 | ACAUAGA |
| ENSG00000124766 | ACUCAA  |
| ENSG00000124766 | AGAUGUG |
| ENSG00000124766 | AGCCCUU |
| ENSG00000124766 | AGCCUGC |
| ENSG00000124766 | AGUGGUU |
| ENSG00000124766 | AUACAAG |
| ENSG00000124766 | AUCCCUU |
| ENSG00000124766 | CAUAUUG |
| ENSG00000124766 | CCAGCAU |
| ENSG00000124766 | CCAGUGC |
| ENSG00000124766 | CCAGUGU |
| ENSG00000124766 | CUCUAGC |
| ENSG00000124766 | GAAUUGU |
| ENSG00000124766 | GAGUUGA |
| ENSG00000124766 | GAGUUGG |
| ENSG00000124766 | GCUGGUG |
| ENSG00000124766 | GGCAGUG |
| ENSG00000124766 | GUAAACA |
| ENSG00000124766 | GUGCCUG |
| ENSG00000124766 | UAAUACA |
| ENSG00000124766 | UCAACAG |
| ENSG00000124766 | UGGCCAC |
| ENSG00000124766 | UUGGUCC |
| ENSG00000124767 | UUCUAAU |
| ENSG00000124772 | AAGAACC |
| ENSG00000124772 | AAGGCAC |
| ENSG00000124772 | AGGCAGG |
| ENSG00000124772 | GGAGGAG |
| ENSG00000124772 | GGCAGGG |
| ENSG00000124782 | ACAGUAC |
| ENSG00000124782 | ACAGUAU |
| ENSG00000124782 | AUGGCAC |
| ENSG00000124782 | AUUCAUU |
| ENSG00000124782 | CAGUAGA |
| ENSG00000124782 | CAGUAGU |
| ENSG00000124782 | CUCACAC |
| ENSG00000124782 | GGAAGAC |
| ENSG00000124782 | UAAUGCU |
| ENSG00000124782 | UCACACA |
| ENSG00000124782 | UCACAUU |
| ENSG00000124782 | UUCCAUA |
| ENSG00000124782 | UUGGUUC |
| ENSG00000124783 | AAGACAU |
| ENSG00000124783 | AAGUGUG |
| ENSG00000124783 | AAGUUGU |
| ENSG00000124783 | ACACACU |
| ENSG00000124783 | ACAUUAC |
| ENSG00000124783 | ACUCAA  |
| ENSG00000124783 | AGGGUCU |
| ENSG00000124783 | AGGUAGU |
| ENSG00000124783 | AGUAGUU |
| ENSG00000124783 | AGUGUGC |
| ENSG00000124783 | CACAAUG |

|                 |         |
|-----------------|---------|
| ENSG00000124783 | CUGCUC  |
| ENSG00000124783 | GAAUUGU |
| ENSG00000124783 | GCAGGUU |
| ENSG00000124783 | GGUUUAC |
| ENSG00000124783 | GUAUUCU |
| ENSG00000124783 | GUGCUUG |
| ENSG00000124783 | GUGUGGC |
| ENSG00000124783 | UAGGGCC |
| ENSG00000124783 | UAUUGCU |
| ENSG00000124783 | UGCAAAG |
| ENSG00000124783 | UGCUCAC |
| ENSG00000124783 | UGUGCUU |
| ENSG00000124783 | UUCUGCA |
| ENSG00000124783 | UUCUUGU |
| ENSG00000124783 | UUGGUUC |
| ENSG00000124784 | AAAAAUC |
| ENSG00000124785 | AACAUUC |
| ENSG00000124785 | AGCAAAA |
| ENSG00000124785 | AUAAUAC |
| ENSG00000124785 | GGCAGUG |
| ENSG00000124785 | GUGCUUG |
| ENSG00000124785 | UGGCUGC |
| ENSG00000124785 | UUGGCAC |
| ENSG00000124786 | CUUUGGU |
| ENSG00000124788 | AAAUCCC |
| ENSG00000124788 | AACAGUC |
| ENSG00000124788 | AAGUGCU |
| ENSG00000124788 | AAGUGUG |
| ENSG00000124788 | ACAUUCA |
| ENSG00000124788 | ACUCCAG |
| ENSG00000124788 | AGCACCA |
| ENSG00000124788 | AGUGCCU |
| ENSG00000124788 | AGUGCUG |
| ENSG00000124788 | AGUGCUU |
| ENSG00000124788 | AUCCCUU |
| ENSG00000124788 | AUGCCUU |
| ENSG00000124788 | AUUCAUU |
| ENSG00000124788 | CACAAUG |
| ENSG00000124788 | CACUGUU |
| ENSG00000124788 | CAGUGCA |
| ENSG00000124788 | CCCUGAG |
| ENSG00000124788 | CUACAAA |
| ENSG00000124788 | CUACAGU |
| ENSG00000124788 | GAAACAU |
| ENSG00000124788 | GGAUUUC |
| ENSG00000124788 | GUAAACA |
| ENSG00000124788 | GUGGCCC |
| ENSG00000124788 | UAAUAUC |
| ENSG00000124788 | UCAACAG |
| ENSG00000124788 | UCACAUU |
| ENSG00000124788 | UCAUUUG |
| ENSG00000124788 | UGCAAAG |
| ENSG00000124788 | UGCCUG  |
| ENSG00000124788 | UUGGCAA |
| ENSG00000124788 | UUGUUCG |
| ENSG00000124789 | AAAUUUC |
| ENSG00000124789 | AAGUCAC |
| ENSG00000124789 | ACAAUUA |
| ENSG00000124789 | ACAGGUG |
| ENSG00000124789 | ACCACAG |
| ENSG00000124789 | ACUGUAG |
| ENSG00000124789 | AUGGAUU |
| ENSG00000124789 | CACCACC |
| ENSG00000124789 | GAUCAGA |

|                 |         |
|-----------------|---------|
| ENSG00000124789 | GCAACUU |
| ENSG00000124789 | GGCAUUG |
| ENSG00000124789 | GGUUUAC |
| ENSG00000124789 | GUUAAUG |
| ENSG00000124789 | UAAUACA |
| ENSG00000124789 | UAAUAUC |
| ENSG00000124789 | UCAAGUA |
| ENSG00000124789 | UCACAGG |
| ENSG00000124789 | UCACAGU |
| ENSG00000124789 | UUCAAGC |
| ENSG00000124795 | AAAGAAU |
| ENSG00000124795 | AUAAAGU |
| ENSG00000124795 | AUACAAG |
| ENSG00000124795 | CAGCAGA |
| ENSG00000124795 | CAGCAGG |
| ENSG00000124795 | GCUGGUG |
| ENSG00000124795 | GUAUUCU |
| ENSG00000124813 | ACUGGCU |
| ENSG00000124813 | AGCCCUU |
| ENSG00000124813 | AGUGCUG |
| ENSG00000124813 | CUGCAGC |
| ENSG00000124813 | GUGCCUG |
| ENSG00000124813 | UAUAUGA |
| ENSG00000124813 | UCACAUU |
| ENSG00000124813 | UUAGAGA |
| ENSG00000124813 | UUCAAGC |
| ENSG00000124818 | AAAGGUA |
| ENSG00000124818 | AGCUGCC |
| ENSG00000124818 | AUGCAUU |
| ENSG00000124818 | UCACAGG |
| ENSG00000124818 | UCACAGU |
| ENSG00000124818 | UUGUGUC |
| ENSG00000124831 | GUAACAG |
| ENSG00000124875 | AAGACAU |
| ENSG00000124882 | CAAAGCA |
| ENSG00000124882 | CCUUCAU |
| ENSG00000124882 | GAGAAAU |
| ENSG00000124920 | AAAGCUG |
| ENSG00000124920 | AAGUGCU |
| ENSG00000124920 | ACUCCAG |
| ENSG00000124920 | AGCAGCU |
| ENSG00000124920 | AGUGCUU |
| ENSG00000124920 | CAAAGCA |
| ENSG00000124920 | CCAGUGC |
| ENSG00000124920 | CUGCUCA |
| ENSG00000124920 | CUUUGGU |
| ENSG00000124920 | GUAACAG |
| ENSG00000124920 | GUCCAGA |
| ENSG00000124920 | UACAAAG |
| ENSG00000124920 | UGCCUG  |
| ENSG00000124939 | UUUCAAC |
| ENSG00000124942 | AAUACUG |
| ENSG00000124942 | ACAUUCA |
| ENSG00000124942 | AGUGCUG |
| ENSG00000124942 | GCUGGAU |
| ENSG00000124942 | GUAAACA |
| ENSG00000125084 | AAAAAUC |
| ENSG00000125084 | AAUUAUU |
| ENSG00000125084 | ACACACC |
| ENSG00000125084 | AGGGAGG |
| ENSG00000125084 | GAGGUAG |
| ENSG00000125084 | GGCAGUG |
| ENSG00000125084 | GGGGCAG |
| ENSG00000125084 | GUGCAAA |

|                 |         |
|-----------------|---------|
| ENSG00000125084 | UUCUGCA |
| ENSG00000125107 | AAAUUUC |
| ENSG00000125107 | AACAUUC |
| ENSG00000125107 | AAUCCUU |
| ENSG00000125107 | ACAUUCA |
| ENSG00000125107 | ACUGGCU |
| ENSG00000125107 | AUACAAG |
| ENSG00000125107 | CUACAAA |
| ENSG00000125107 | CUACAGU |
| ENSG00000125107 | UCACAGG |
| ENSG00000125107 | UCACAGU |
| ENSG00000125107 | UGGCCAC |
| ENSG00000125124 | UUCAAGC |
| ENSG00000125149 | AAAGUGC |
| ENSG00000125149 | ACACACC |
| ENSG00000125149 | ACACACU |
| ENSG00000125149 | CUAUACA |
| ENSG00000125149 | CUUUGGU |
| ENSG00000125149 | GGAAGAC |
| ENSG00000125149 | GUAGUGU |
| ENSG00000125149 | GUGCAA  |
| ENSG00000125149 | GUGCUUG |
| ENSG00000125149 | UCAAGUA |
| ENSG00000125149 | UCACAAG |
| ENSG00000125149 | UGUCUUU |
| ENSG00000125149 | UGUGCUU |
| ENSG00000125149 | UUGGCAA |
| ENSG00000125149 | UUGGCAC |
| ENSG00000125166 | AAAGCUG |
| ENSG00000125166 | GGUUGUC |
| ENSG00000125166 | GGUUUAC |
| ENSG00000125166 | GUAAACA |
| ENSG00000125166 | UCACCAC |
| ENSG00000125166 | UUGGUUC |
| ENSG00000125170 | ACAGUAU |
| ENSG00000125170 | AUAUUAU |
| ENSG00000125170 | CAGCAGG |
| ENSG00000125170 | CCUUCAU |
| ENSG00000125170 | CCUUCUG |
| ENSG00000125170 | CUCCAGC |
| ENSG00000125170 | GUGCCAC |
| ENSG00000125170 | UGCAUUG |
| ENSG00000125170 | UUCUGCA |
| ENSG00000125170 | UUGGCAC |
| ENSG00000125246 | AAUCUCU |
| ENSG00000125246 | UCAUGAU |
| ENSG00000125249 | AAGGCAC |
| ENSG00000125249 | AGCCCUU |
| ENSG00000125249 | AUGGCUU |
| ENSG00000125249 | CAGGCUC |
| ENSG00000125249 | CUUUGGU |
| ENSG00000125249 | GAUUGUA |
| ENSG00000125255 | UCACAAG |
| ENSG00000125255 | UGAAAUG |
| ENSG00000125255 | UUUCAAC |
| ENSG00000125257 | CCCUGAG |
| ENSG00000125257 | GAGAUGA |
| ENSG00000125257 | UCCUGAG |
| ENSG00000125257 | UGUGCUU |
| ENSG00000125266 | AAAAACC |
| ENSG00000125266 | AAAGUGC |
| ENSG00000125266 | AAGUGCU |
| ENSG00000125266 | AGCAGCU |
| ENSG00000125266 | AGUAACA |

|                 |          |
|-----------------|----------|
| ENSG00000125266 | AGUGCAA  |
| ENSG00000125266 | AUCCCUU  |
| ENSG00000125266 | AUGACAC  |
| ENSG00000125266 | AUGGCUU  |
| ENSG00000125266 | AUUCAUU  |
| ENSG00000125266 | CAGUGCA  |
| ENSG00000125266 | CUUCACC  |
| ENSG00000125266 | GAGAACC  |
| ENSG00000125266 | GAUUGUC  |
| ENSG00000125266 | GCAGCAU  |
| ENSG00000125266 | GUCAUUG  |
| ENSG00000125266 | UACAAAG  |
| ENSG00000125266 | UAGACUG  |
| ENSG00000125266 | UAUUGCU  |
| ENSG00000125266 | UCACAGG  |
| ENSG00000125266 | UCCCUGU  |
| ENSG00000125266 | UGAGUCU  |
| ENSG00000125266 | UGCAAAG  |
| ENSG00000125266 | UGCAUAG  |
| ENSG00000125266 | UGCAUAU  |
| ENSG00000125266 | UGUGCUU  |
| ENSG00000125266 | UUCUGCA  |
| ENSG00000125266 | UUGGCAC  |
| ENSG00000125266 | UUUGCAA  |
| ENSG00000125285 | AUAU AAC |
| ENSG00000125285 | AUAUUAU  |
| ENSG00000125285 | CAGGCUC  |
| ENSG00000125285 | GAAUUGU  |
| ENSG00000125285 | UCACAAG  |
| ENSG00000125285 | UCAUUCG  |
| ENSG00000125285 | UUGUUCG  |
| ENSG00000125347 | AAAGUGC  |
| ENSG00000125347 | AAGGCAC  |
| ENSG00000125347 | CCUUCAU  |
| ENSG00000125347 | UCACAUU  |
| ENSG00000125351 | AAGGCAC  |
| ENSG00000125351 | CUUUGGU  |
| ENSG00000125351 | GGCUGCG  |
| ENSG00000125354 | AAAGCUG  |
| ENSG00000125354 | ACUCAA   |
| ENSG00000125354 | CAGUCCA  |
| ENSG00000125354 | GAGGCAG  |
| ENSG00000125354 | GGAGGCA  |
| ENSG00000125354 | GGGGUGG  |
| ENSG00000125354 | GUAAACA  |
| ENSG00000125355 | ACAAGGU  |
| ENSG00000125355 | ACCAGCA  |
| ENSG00000125355 | GGAUUUU  |
| ENSG00000125355 | GGGGUGC  |
| ENSG00000125355 | UCCCUUG  |
| ENSG00000125355 | UUUGCAC  |
| ENSG00000125378 | CAAAACU  |
| ENSG00000125378 | UAUAAAAG |
| ENSG00000125378 | UUUGCAC  |
| ENSG00000125386 | AAAAGUA  |
| ENSG00000125386 | AAGACAU  |
| ENSG00000125386 | AAGUAGC  |
| ENSG00000125386 | ACAAUUAU |
| ENSG00000125386 | AGCCAGU  |
| ENSG00000125386 | AGUACUG  |
| ENSG00000125386 | CAGUAGA  |
| ENSG00000125386 | CUUACAG  |
| ENSG00000125386 | GUUUUCU  |
| ENSG00000125386 | GUUAAAUG |

|                 |          |
|-----------------|----------|
| ENSG00000125386 | UAAUACA  |
| ENSG00000125386 | UAAUAUC  |
| ENSG00000125386 | UUCAAAU  |
| ENSG00000125386 | UUCUGCA  |
| ENSG00000125398 | AAAGAGC  |
| ENSG00000125398 | AAAGAGG  |
| ENSG00000125398 | AAAGUUU  |
| ENSG00000125398 | AGAUAAA  |
| ENSG00000125398 | AUAUUAU  |
| ENSG00000125398 | GAAAACA  |
| ENSG00000125398 | GGAAUGU  |
| ENSG00000125398 | GGUUACC  |
| ENSG00000125398 | UAAUAUC  |
| ENSG00000125398 | UCAUACA  |
| ENSG00000125398 | UGUAUAA  |
| ENSG00000125398 | UUUGCAA  |
| ENSG00000125414 | UCACAUU  |
| ENSG00000125430 | AGGCAGG  |
| ENSG00000125430 | GAGUGUG  |
| ENSG00000125430 | GUGCUUG  |
| ENSG00000125430 | GUGUGGC  |
| ENSG00000125430 | UAGUGAG  |
| ENSG00000125430 | UAUAAAAG |
| ENSG00000125434 | UGGCCAC  |
| ENSG00000125447 | AAGUCAC  |
| ENSG00000125447 | AGCAAAA  |
| ENSG00000125447 | AGCAGCA  |
| ENSG00000125447 | AGGGUCU  |
| ENSG00000125447 | AGGUAGU  |
| ENSG00000125447 | CAGCAAA  |
| ENSG00000125447 | CUGGAAA  |
| ENSG00000125447 | GAGGUAG  |
| ENSG00000125447 | GCAGCAU  |
| ENSG00000125447 | GGGCCCC  |
| ENSG00000125447 | GUCUCUG  |
| ENSG00000125447 | UCAAGUA  |
| ENSG00000125447 | UCACACA  |
| ENSG00000125459 | AUGAUGC  |
| ENSG00000125459 | CCCACCG  |
| ENSG00000125459 | CCCACCU  |
| ENSG00000125459 | CUCUUCC  |
| ENSG00000125459 | UCCCACA  |
| ENSG00000125459 | UGCAGCU  |
| ENSG00000125462 | GAGUCUU  |
| ENSG00000125492 | CAUGGGU  |
| ENSG00000125492 | GGCCUG   |
| ENSG00000125492 | UCAUUUG  |
| ENSG00000125492 | UUUGCAC  |
| ENSG00000125503 | AGCAAAA  |
| ENSG00000125503 | AGCAGCU  |
| ENSG00000125503 | AUGGCUU  |
| ENSG00000125503 | CAGCAAA  |
| ENSG00000125503 | GCAACUU  |
| ENSG00000125503 | GUCACUC  |
| ENSG00000125503 | GUGCCUG  |
| ENSG00000125503 | GUGCUUG  |
| ENSG00000125503 | UGUGCUU  |
| ENSG00000125503 | UUGGCAC  |
| ENSG00000125505 | GGCUCAG  |
| ENSG00000125510 | GACCUGG  |
| ENSG00000125510 | GCACCAU  |
| ENSG00000125520 | AAUUGCU  |
| ENSG00000125520 | AGAUGUG  |
| ENSG00000125520 | CAAAGUG  |

|                 |         |
|-----------------|---------|
| ENSG00000125520 | GUGCAAA |
| ENSG00000125520 | UAUAAAG |
| ENSG00000125520 | UCAACAG |
| ENSG00000125520 | UGCAAAG |
| ENSG00000125618 | ACAGUAC |
| ENSG00000125618 | ACAGUAU |
| ENSG00000125618 | CUCCAC  |
| ENSG00000125618 | CUGGACU |
| ENSG00000125618 | GAGUCUU |
| ENSG00000125618 | GCUGGAU |
| ENSG00000125618 | GGAGGAG |
| ENSG00000125618 | GGUUUAC |
| ENSG00000125618 | GUGACUG |
| ENSG00000125618 | GUGCCUG |
| ENSG00000125618 | UACAGUU |
| ENSG00000125618 | UCAUUUG |
| ENSG00000125618 | UGAGUCU |
| ENSG00000125618 | UGUGUGG |
| ENSG00000125618 | UUGGAGG |
| ENSG00000125618 | UUGUGUC |
| ENSG00000125629 | AAGGCAC |
| ENSG00000125629 | AAUUUUA |
| ENSG00000125629 | ACUGCAU |
| ENSG00000125629 | AGUGCUG |
| ENSG00000125629 | AUACCUC |
| ENSG00000125629 | GGAUUUU |
| ENSG00000125629 | GUGCAAA |
| ENSG00000125629 | UAAUACA |
| ENSG00000125629 | UCAUAGA |
| ENSG00000125629 | UCUGGAA |
| ENSG00000125629 | UUGUUCG |
| ENSG00000125629 | UUUUUGC |
| ENSG00000125633 | ACAGGUG |
| ENSG00000125633 | CCUUCAU |
| ENSG00000125633 | CUGCUC  |
| ENSG00000125633 | GAGAAGA |
| ENSG00000125633 | GAGGUAG |
| ENSG00000125633 | UGAGAAG |
| ENSG00000125633 | UGCUCAC |
| ENSG00000125637 | ACCCAUU |
| ENSG00000125637 | CAGCUGG |
| ENSG00000125637 | GGAGGAG |
| ENSG00000125637 | UGGCUGC |
| ENSG00000125656 | UCACAGU |
| ENSG00000125657 | GAGGUAU |
| ENSG00000125675 | AUGGCUU |
| ENSG00000125675 | AUUGCAC |
| ENSG00000125675 | GAGGCUG |
| ENSG00000125675 | UACAAAG |
| ENSG00000125675 | UAGUGAG |
| ENSG00000125675 | UCACAGU |
| ENSG00000125675 | UUCCAUA |
| ENSG00000125675 | UUGGCAA |
| ENSG00000125676 | AGAUAAA |
| ENSG00000125676 | GAGAAAU |
| ENSG00000125676 | GAGGUAG |
| ENSG00000125676 | GAGGUAU |
| ENSG00000125676 | UACAAAG |
| ENSG00000125676 | UGAGAAG |
| ENSG00000125676 | UGAGAAU |
| ENSG00000125676 | UGUGCUU |
| ENSG00000125686 | AAAGUAA |
| ENSG00000125686 | AAAGUAU |
| ENSG00000125686 | AAUACUG |



|                 |          |
|-----------------|----------|
| ENSG00000125686 | ACCCUGU  |
| ENSG00000125686 | AGCAGCA  |
| ENSG00000125686 | AGCAUUC  |
| ENSG00000125686 | AGCCCUU  |
| ENSG00000125686 | AGGCAGG  |
| ENSG00000125686 | AGGGAGG  |
| ENSG00000125686 | AUGGCAC  |
| ENSG00000125686 | AUGGCUU  |
| ENSG00000125686 | CAA AUGC |
| ENSG00000125686 | CACAGUG  |
| ENSG00000125686 | CAGUGCA  |
| ENSG00000125686 | CCCUGUC  |
| ENSG00000125686 | GAGAAAU  |
| ENSG00000125686 | GGAAUGU  |
| ENSG00000125686 | GGAUUUC  |
| ENSG00000125686 | GGCAGGG  |
| ENSG00000125686 | GGCUGCG  |
| ENSG00000125686 | GUCACUC  |
| ENSG00000125686 | GUGUCAC  |
| ENSG00000125686 | UCCUGU   |
| ENSG00000125686 | UCCUUGC  |
| ENSG00000125686 | UCUCAA   |
| ENSG00000125686 | UGGCUGC  |
| ENSG00000125686 | UGGGACA  |
| ENSG00000125686 | UGUGCUU  |
| ENSG00000125686 | UUCAAAU  |
| ENSG00000125686 | UUGAUCA  |
| ENSG00000125691 | UACAAAG  |
| ENSG00000125730 | UGAAGCU  |
| ENSG00000125733 | AAGUGCA  |
| ENSG00000125733 | AGCAGCA  |
| ENSG00000125733 | AUAAAGU  |
| ENSG00000125733 | GUGGCC   |
| ENSG00000125740 | AAGUCAC  |
| ENSG00000125740 | ACAGUAU  |
| ENSG00000125740 | AUAAUAC  |
| ENSG00000125740 | AUAUAAC  |
| ENSG00000125740 | CACCAGC  |
| ENSG00000125740 | CAGUGCA  |
| ENSG00000125740 | CCUGCUG  |
| ENSG00000125740 | CUAGGCU  |
| ENSG00000125740 | GCAGAAG  |
| ENSG00000125740 | GGAAUGU  |
| ENSG00000125740 | GGCAGUG  |
| ENSG00000125740 | UAUAAUA  |
| ENSG00000125740 | UCACAUU  |
| ENSG00000125744 | AAAUCCC  |
| ENSG00000125744 | AAGUGCA  |
| ENSG00000125744 | CAGCAGG  |
| ENSG00000125744 | CCCUGG   |
| ENSG00000125744 | CGCCUCC  |
| ENSG00000125744 | CUCCAGC  |
| ENSG00000125744 | GGCGCCU  |
| ENSG00000125744 | UAUUACC  |
| ENSG00000125744 | UGCAAAG  |
| ENSG00000125753 | AAAGUGC  |
| ENSG00000125753 | AAAUUUC  |
| ENSG00000125753 | AGCCAGU  |
| ENSG00000125753 | AGCUGCC  |
| ENSG00000125753 | AGGCAGG  |
| ENSG00000125753 | CAGCAGA  |
| ENSG00000125753 | CAGCAGG  |
| ENSG00000125753 | GAGGCAG  |
| ENSG00000125753 | GGAAGCC  |

|                 |         |
|-----------------|---------|
| ENSG00000125753 | GGAAUGU |
| ENSG00000125753 | GGCAGGG |
| ENSG00000125775 | CUGCAGG |
| ENSG00000125780 | CUGCAGC |
| ENSG00000125780 | GCAGCAU |
| ENSG00000125798 | AAAACUG |
| ENSG00000125798 | AACACUG |
| ENSG00000125798 | UAAUAUC |
| ENSG00000125810 | AAUCUCA |
| ENSG00000125810 | AUCCUUU |
| ENSG00000125810 | CAGUCCA |
| ENSG00000125810 | UCACACA |
| ENSG00000125810 | UCCUGAG |
| ENSG00000125810 | UUCCUAG |
| ENSG00000125810 | UUUGCAC |
| ENSG00000125812 | AACAAAC |
| ENSG00000125812 | CAGCUGG |
| ENSG00000125812 | CCUUCUU |
| ENSG00000125812 | CUACAAA |
| ENSG00000125812 | UACAAAG |
| ENSG00000125812 | UCACAGG |
| ENSG00000125812 | UUGGUCC |
| ENSG00000125813 | UGCUGAC |
| ENSG00000125814 | AAUACUG |
| ENSG00000125814 | CUUUGGU |
| ENSG00000125814 | GCACCAU |
| ENSG00000125814 | GGUUACC |
| ENSG00000125814 | UCUCAAG |
| ENSG00000125814 | UGCAUAU |
| ENSG00000125814 | UUGGUUC |
| ENSG00000125816 | AUUGCAC |
| ENSG00000125817 | AGCACCA |
| ENSG00000125817 | AGCCCUU |
| ENSG00000125817 | AUGGCUU |
| ENSG00000125817 | CUAGGCU |
| ENSG00000125817 | CUGCAGC |
| ENSG00000125817 | GAGCCCU |
| ENSG00000125817 | GAGGCUG |
| ENSG00000125817 | GGGGUCC |
| ENSG00000125817 | GUGCUUG |
| ENSG00000125817 | UGCAGCU |
| ENSG00000125817 | UGGCUGC |
| ENSG00000125817 | UGUGCUU |
| ENSG00000125818 | AACACUG |
| ENSG00000125818 | ACAUUCA |
| ENSG00000125818 | ACUGCAU |
| ENSG00000125818 | AGGAGCU |
| ENSG00000125818 | CAGCAGG |
| ENSG00000125818 | CCCCCAG |
| ENSG00000125818 | GCAGCAU |
| ENSG00000125818 | GCUGGUG |
| ENSG00000125818 | GGCAGCG |
| ENSG00000125818 | GGGUCUU |
| ENSG00000125818 | UCUUGAG |
| ENSG00000125818 | UGACAUC |
| ENSG00000125818 | UUGAGGC |
| ENSG00000125820 | AAAAAUC |
| ENSG00000125820 | AAAGUGC |
| ENSG00000125820 | CUCACAC |
| ENSG00000125820 | GGAUUUU |
| ENSG00000125820 | GUAAACA |
| ENSG00000125820 | UACAAAG |
| ENSG00000125820 | UCACACA |
| ENSG00000125820 | UCUCCAA |

|                 |         |
|-----------------|---------|
| ENSG00000125820 | UUGGUCC |
| ENSG00000125820 | UUUGCAC |
| ENSG00000125821 | CUUUGGU |
| ENSG00000125834 | AAAGAAU |
| ENSG00000125834 | AAAGUUU |
| ENSG00000125834 | AAGGCAC |
| ENSG00000125834 | AAGUUGU |
| ENSG00000125834 | ACCAGCA |
| ENSG00000125834 | AGCACCA |
| ENSG00000125834 | AGCCAGU |
| ENSG00000125834 | AUUCAUU |
| ENSG00000125834 | CACAGUG |
| ENSG00000125834 | CACCACC |
| ENSG00000125834 | CCUGUAC |
| ENSG00000125834 | CUGGGGG |
| ENSG00000125834 | CUUCUCU |
| ENSG00000125834 | CUUGGAG |
| ENSG00000125834 | GAUAUGU |
| ENSG00000125834 | GGUGGGC |
| ENSG00000125834 | GUCCAGA |
| ENSG00000125834 | GUGAGGU |
| ENSG00000125834 | UAUUGCU |
| ENSG00000125834 | UCACAUU |
| ENSG00000125834 | UUGGCAC |
| ENSG00000125835 | AACAAAC |
| ENSG00000125841 | GAGAUGA |
| ENSG00000125844 | AAGGCAC |
| ENSG00000125844 | AUGGCUU |
| ENSG00000125844 | AUUGCAC |
| ENSG00000125844 | GGAAUGU |
| ENSG00000125845 | AAAGUGC |
| ENSG00000125845 | AAGUCUU |
| ENSG00000125845 | AUAAAGU |
| ENSG00000125845 | UGAGAAU |
| ENSG00000125845 | UUCAAAU |
| ENSG00000125845 | UUUCAAC |
| ENSG00000125848 | AAAGCUG |
| ENSG00000125848 | AAGGCAC |
| ENSG00000125848 | ACAAGGU |
| ENSG00000125848 | ACUCAGC |
| ENSG00000125848 | ACUCAGG |
| ENSG00000125848 | ACUGGCC |
| ENSG00000125848 | AUGGCAC |
| ENSG00000125848 | CAAAGUG |
| ENSG00000125848 | CACAGUG |
| ENSG00000125848 | CCAGUGC |
| ENSG00000125848 | CCAUUAC |
| ENSG00000125848 | CUUUGGU |
| ENSG00000125848 | GAUUGUA |
| ENSG00000125848 | GAUUGUC |
| ENSG00000125848 | GGGCGUA |
| ENSG00000125848 | GUCAACA |
| ENSG00000125848 | GUGCUUG |
| ENSG00000125848 | UAUAUGA |
| ENSG00000125848 | UCACAGG |
| ENSG00000125848 | UGUGCUU |
| ENSG00000125848 | UUGGUUC |
| ENSG00000125848 | UUUGCAC |
| ENSG00000125850 | AAGGCAC |
| ENSG00000125850 | GUAAACA |
| ENSG00000125850 | UCAUUUG |
| ENSG00000125851 | AAAAACC |
| ENSG00000125851 | AACUGGU |
| ENSG00000125851 | AAUUGCU |

|                 |         |
|-----------------|---------|
| ENSG00000125851 | AUCAUAC |
| ENSG00000125851 | GACAACU |
| ENSG00000125851 | GAGAAGA |
| ENSG00000125851 | GCUGGUG |
| ENSG00000125851 | UCACAGG |
| ENSG00000125851 | UUGGUUC |
| ENSG00000125868 | AAAGUAA |
| ENSG00000125868 | GGAAGCC |
| ENSG00000125869 | AAAGUGC |
| ENSG00000125869 | UGCAUAG |
| ENSG00000125871 | AAACUGU |
| ENSG00000125871 | CUGGGCA |
| ENSG00000125871 | UCAACAG |
| ENSG00000125875 | AAGGCAC |
| ENSG00000125875 | AAGUGCU |
| ENSG00000125875 | ACCAGCA |
| ENSG00000125875 | AGCAAAA |
| ENSG00000125875 | AGCAGCA |
| ENSG00000125875 | AGUGCUU |
| ENSG00000125875 | CUCCAA  |
| ENSG00000125875 | CUUCUCU |
| ENSG00000125875 | GAAGGAA |
| ENSG00000125875 | GAAGGUC |
| ENSG00000125875 | GACCCUG |
| ENSG00000125875 | GGAGAGA |
| ENSG00000125875 | GGCAGGG |
| ENSG00000125875 | UGGCUGC |
| ENSG00000125878 | AAAAAUC |
| ENSG00000125878 | GGGUCUU |
| ENSG00000125878 | UCACACA |
| ENSG00000125895 | AGCAGCG |
| ENSG00000125895 | AGCAGCU |
| ENSG00000125895 | CAGCAGA |
| ENSG00000125895 | GCAGAAG |
| ENSG00000125898 | CAGCAA  |
| ENSG00000125898 | GAAGGAA |
| ENSG00000125898 | GGGUAAG |
| ENSG00000125912 | CCUGAG  |
| ENSG00000125912 | UAUUGCU |
| ENSG00000125912 | UCCACA  |
| ENSG00000125944 | UCAUGAU |
| ENSG00000125944 | UGAAAUG |
| ENSG00000125944 | UUCAAGC |
| ENSG00000125945 | AAAAACC |
| ENSG00000125945 | AGCAGCA |
| ENSG00000125945 | UUGGUCC |
| ENSG00000125952 | AAAGCUG |
| ENSG00000125952 | AGCUGCC |
| ENSG00000125952 | AGGGAGG |
| ENSG00000125952 | CAAGAGC |
| ENSG00000125952 | CAGGAAC |
| ENSG00000125952 | GGAAGCC |
| ENSG00000125952 | GGCUCUG |
| ENSG00000125952 | UAUUGCU |
| ENSG00000125952 | UUCAAAU |
| ENSG00000125952 | UUGGUUC |
| ENSG00000125954 | AGUAGUU |
| ENSG00000125954 | CAAAGCA |
| ENSG00000125954 | GUUAAUG |
| ENSG00000125954 | UCCUGAG |
| ENSG00000125965 | CCAGUGC |
| ENSG00000125965 | GGAAGAC |
| ENSG00000125966 | AAAGUAU |
| ENSG00000125966 | AAGUGCU |

|                 |          |
|-----------------|----------|
| ENSG00000125966 | AAUCACU  |
| ENSG00000125966 | ACCAGCA  |
| ENSG00000125966 | AGCACCA  |
| ENSG00000125966 | AGUGCUG  |
| ENSG00000125966 | AGUGC UU |
| ENSG00000125966 | AUAAAGU  |
| ENSG00000125966 | AUCACUA  |
| ENSG00000125966 | CAGCAGG  |
| ENSG00000125966 | CAGUAGU  |
| ENSG00000125966 | CCAGGAG  |
| ENSG00000125966 | GAGCCCU  |
| ENSG00000125966 | GAUCAGA  |
| ENSG00000125966 | GCAGCAU  |
| ENSG00000125966 | GCCUGU   |
| ENSG00000125966 | UACAAAG  |
| ENSG00000125966 | UCCUGAG  |
| ENSG00000125966 | UGAA AUG |
| ENSG00000125966 | UUUGCAA  |
| ENSG00000125967 | AAUUAUU  |
| ENSG00000125967 | AGGCAGG  |
| ENSG00000125967 | CUGGGGG  |
| ENSG00000125967 | GGCAGGG  |
| ENSG00000125968 | AACAAAC  |
| ENSG00000125968 | AUACAAG  |
| ENSG00000125968 | GAGAAGA  |
| ENSG00000125968 | UGAGAAG  |
| ENSG00000125968 | UCCUCG   |
| ENSG00000125970 | AAAAACC  |
| ENSG00000125970 | AAUCUCU  |
| ENSG00000125970 | ACUGGCU  |
| ENSG00000125970 | CCUGCUG  |
| ENSG00000125970 | UGCCAGC  |
| ENSG00000125977 | AAAACUG  |
| ENSG00000125977 | AACCUGU  |
| ENSG00000125977 | AAUCACU  |
| ENSG00000125977 | AUAAUAC  |
| ENSG00000125977 | GAGGUAG  |
| ENSG00000125977 | GAGGU AU |
| ENSG00000125977 | GGCAGCG  |
| ENSG00000125977 | GUCCAGA  |
| ENSG00000125977 | GUGAGGU  |
| ENSG00000125977 | UCAACAG  |
| ENSG00000125977 | UCACAGU  |
| ENSG00000125977 | UGCAAAG  |
| ENSG00000125977 | UGCAUUG  |
| ENSG00000125977 | UUUGCAA  |
| ENSG00000125991 | AACCUGG  |
| ENSG00000126001 | GGGUUUA  |
| ENSG00000126003 | AAACGGU  |
| ENSG00000126003 | AAAGAGG  |
| ENSG00000126003 | AAAGUGC  |
| ENSG00000126003 | AAAGUUU  |
| ENSG00000126003 | AACAAAC  |
| ENSG00000126003 | AACACUG  |
| ENSG00000126003 | AACAGUC  |
| ENSG00000126003 | AAGGCAC  |
| ENSG00000126003 | AAGUGUG  |
| ENSG00000126003 | ACUUGGA  |
| ENSG00000126003 | AGCUGCC  |
| ENSG00000126003 | AUAAAGU  |
| ENSG00000126003 | AUAUAAC  |
| ENSG00000126003 | AUGGAUU  |
| ENSG00000126003 | CAAAGUG  |
| ENSG00000126003 | CACACCU  |

|                 |         |
|-----------------|---------|
| ENSG00000126003 | CACAGUG |
| ENSG00000126003 | CACUGUU |
| ENSG00000126003 | CAGUCCA |
| ENSG00000126003 | CCAGGAG |
| ENSG00000126003 | CCUGAG  |
| ENSG00000126003 | CUCCAGC |
| ENSG00000126003 | CUGCAGG |
| ENSG00000126003 | CUGGGCA |
| ENSG00000126003 | GAAAACA |
| ENSG00000126003 | GAAGGUC |
| ENSG00000126003 | GAGAUGA |
| ENSG00000126003 | GAGGCAG |
| ENSG00000126003 | GAGGUAG |
| ENSG00000126003 | GCAGGUU |
| ENSG00000126003 | GCUGGUG |
| ENSG00000126003 | GCUUCCU |
| ENSG00000126003 | GGACCUG |
| ENSG00000126003 | GGGGGAA |
| ENSG00000126003 | GUCAGUU |
| ENSG00000126003 | GUCUUGC |
| ENSG00000126003 | GUGUGGC |
| ENSG00000126003 | UAUUACC |
| ENSG00000126003 | UCACAGG |
| ENSG00000126003 | UCACAGU |
| ENSG00000126003 | UGAAAUG |
| ENSG00000126003 | UGAUCCA |
| ENSG00000126010 | UUGGAGG |
| ENSG00000126016 | AAGGCAC |
| ENSG00000126016 | AAUCCUU |
| ENSG00000126016 | AAUUAAU |
| ENSG00000126016 | AGCAAAA |
| ENSG00000126016 | AGCAGCA |
| ENSG00000126016 | AGCUGCC |
| ENSG00000126016 | AUAUUAU |
| ENSG00000126016 | CCAGGAG |
| ENSG00000126016 | GAGAAGA |
| ENSG00000126016 | GGAAUGU |
| ENSG00000126016 | UAUAUGA |
| ENSG00000126016 | UCCUGAG |
| ENSG00000126016 | UGAAAUG |
| ENSG00000126016 | UGAGAAG |
| ENSG00000126062 | AGUGGUU |
| ENSG00000126062 | GGCUCAG |
| ENSG00000126062 | GUAGUGU |
| ENSG00000126062 | UCCUCU  |
| ENSG00000126062 | UUGGCAC |
| ENSG00000126070 | AUUGCAC |
| ENSG00000126070 | CUGGAAA |
| ENSG00000126070 | GAAACAU |
| ENSG00000126070 | GAGGUAG |
| ENSG00000126070 | GAGGUAU |
| ENSG00000126070 | GCAACUU |
| ENSG00000126070 | GUAUGUU |
| ENSG00000126070 | UCCUUGC |
| ENSG00000126070 | UGCAUAG |
| ENSG00000126070 | UGGCUGC |
| ENSG00000126070 | UGUGCUU |
| ENSG00000126088 | CUGGAAA |
| ENSG00000126091 | AUAAUAC |
| ENSG00000126091 | AUCCCUU |
| ENSG00000126091 | CUUCUCU |
| ENSG00000126091 | GCUUCCU |
| ENSG00000126091 | GGCCUG  |
| ENSG00000126091 | GGGUAAG |

|                 |          |
|-----------------|----------|
| ENSG00000126091 | GUCUCUG  |
| ENSG00000126091 | UAAUACA  |
| ENSG00000126091 | UAUUGCU  |
| ENSG00000126091 | UCACAAG  |
| ENSG00000126091 | UGGCCCU  |
| ENSG00000126091 | UUGGCAC  |
| ENSG00000126106 | CAGCAGA  |
| ENSG00000126106 | CAGCAGG  |
| ENSG00000126107 | AAGUAGC  |
| ENSG00000126107 | GGGGCAG  |
| ENSG00000126107 | UCAAGUA  |
| ENSG00000126216 | AACAAAC  |
| ENSG00000126216 | AUAUAAC  |
| ENSG00000126216 | GUAAACA  |
| ENSG00000126217 | ACAAUUAU |
| ENSG00000126217 | ACACACC  |
| ENSG00000126217 | ACACACU  |
| ENSG00000126217 | ACCACAG  |
| ENSG00000126217 | CACAGUG  |
| ENSG00000126247 | AAGGCAC  |
| ENSG00000126247 | UUGGCAC  |
| ENSG00000126261 | AAAUGGU  |
| ENSG00000126261 | AACCUGG  |
| ENSG00000126261 | AACCUGU  |
| ENSG00000126261 | UACAAAG  |
| ENSG00000126351 | AAAGUGC  |
| ENSG00000126351 | AAGUGCA  |
| ENSG00000126351 | CAAAGUG  |
| ENSG00000126351 | CCCUGUC  |
| ENSG00000126351 | GCCCUGU  |
| ENSG00000126351 | GGAGAGA  |
| ENSG00000126351 | GGAGGAG  |
| ENSG00000126353 | AGCUUAU  |
| ENSG00000126353 | GAGGUUAU |
| ENSG00000126453 | CCCUGAG  |
| ENSG00000126457 | AAAAACC  |
| ENSG00000126458 | AAGGCAC  |
| ENSG00000126461 | GUCCAGA  |
| ENSG00000126461 | GUGGGGA  |
| ENSG00000126461 | UCAUGAU  |
| ENSG00000126464 | AAAAAUC  |
| ENSG00000126464 | AAUGCCC  |
| ENSG00000126464 | ACACACC  |
| ENSG00000126464 | ACAUAGA  |
| ENSG00000126464 | ACAUUAC  |
| ENSG00000126464 | AUAUAAC  |
| ENSG00000126464 | CACAGUG  |
| ENSG00000126464 | CCCCCAG  |
| ENSG00000126464 | CUAUACA  |
| ENSG00000126464 | GGGGCAG  |
| ENSG00000126464 | UGCCUG   |
| ENSG00000126500 | ACAGGUG  |
| ENSG00000126500 | AGGUAGU  |
| ENSG00000126500 | AUGUCUG  |
| ENSG00000126500 | UCCAGUU  |
| ENSG00000126524 | GGCAGCG  |
| ENSG00000126524 | UUGGCAA  |
| ENSG00000126524 | UUGGCAC  |
| ENSG00000126562 | AGUGGUU  |
| ENSG00000126562 | CAGCUGG  |
| ENSG00000126581 | AAAGUGC  |
| ENSG00000126581 | AAUCUCU  |
| ENSG00000126581 | AUAAAGU  |
| ENSG00000126581 | CAAAACU  |

|                 |         |
|-----------------|---------|
| ENSG00000126581 | UACAAAG |
| ENSG00000126583 | AGCAGCU |
| ENSG00000126583 | GCAUCC  |
| ENSG00000126583 | UCUGGAA |
| ENSG00000126603 | AACCGU  |
| ENSG00000126603 | AACUCUA |
| ENSG00000126603 | AAGGCAC |
| ENSG00000126603 | AAUACUG |
| ENSG00000126603 | AGCACCA |
| ENSG00000126603 | CCAGUGC |
| ENSG00000126603 | GCAACUU |
| ENSG00000126603 | GCACCAU |
| ENSG00000126603 | GCCUGU  |
| ENSG00000126603 | GCCUGGG |
| ENSG00000126603 | GGAAUGU |
| ENSG00000126603 | GUCUUGC |
| ENSG00000126603 | GUGCAA  |
| ENSG00000126603 | UAUAAAG |
| ENSG00000126603 | UCCUCU  |
| ENSG00000126603 | UUUGCAA |
| ENSG00000126653 | AUAAAGU |
| ENSG00000126653 | UGUGCUU |
| ENSG00000126698 | AAAAAUC |
| ENSG00000126698 | AAGUCAC |
| ENSG00000126698 | UGGGUAC |
| ENSG00000126746 | AAAAACC |
| ENSG00000126746 | AAAUCC  |
| ENSG00000126746 | AAAUGGU |
| ENSG00000126746 | AUACAAG |
| ENSG00000126746 | AUAUAAC |
| ENSG00000126746 | AUGCAUU |
| ENSG00000126746 | UAUAAAG |
| ENSG00000126767 | AAAAAUC |
| ENSG00000126767 | ACCUUGA |
| ENSG00000126767 | ACUCCAG |
| ENSG00000126767 | ACUGGCU |
| ENSG00000126767 | AGACGGG |
| ENSG00000126767 | AGUACUG |
| ENSG00000126767 | AUGGCUU |
| ENSG00000126767 | CAUGGAU |
| ENSG00000126767 | CCCACCG |
| ENSG00000126767 | CCCACCU |
| ENSG00000126767 | CCCCCAG |
| ENSG00000126767 | CUCAGGG |
| ENSG00000126767 | CUCCAUI |
| ENSG00000126767 | CUCCCAA |
| ENSG00000126767 | GACCUGG |
| ENSG00000126767 | GAGACCU |
| ENSG00000126767 | GGAGAGA |
| ENSG00000126767 | UCCACA  |
| ENSG00000126767 | UCCACC  |
| ENSG00000126768 | CCCUGAG |
| ENSG00000126768 | GAGGUAG |
| ENSG00000126768 | UGCCUG  |
| ENSG00000126773 | AACACUG |
| ENSG00000126777 | AAAACUG |
| ENSG00000126777 | AGCAAAA |
| ENSG00000126777 | CAAAACU |
| ENSG00000126777 | CAGUAGA |
| ENSG00000126777 | CCAUUAC |
| ENSG00000126777 | UAAUACA |
| ENSG00000126777 | UACAAAG |
| ENSG00000126777 | UAUAAUA |
| ENSG00000126777 | UUGGCAC |



|                 |          |
|-----------------|----------|
| ENSG00000126804 | GGAAGAC  |
| ENSG00000126804 | GUGCCAC  |
| ENSG00000126804 | UCUCCAA  |
| ENSG00000126814 | AAAAGUA  |
| ENSG00000126814 | AAAGUAA  |
| ENSG00000126814 | AAUCACU  |
| ENSG00000126814 | AGGCAGG  |
| ENSG00000126814 | CACCAGC  |
| ENSG00000126814 | GCAGGAC  |
| ENSG00000126814 | GGAGGAG  |
| ENSG00000126814 | GGCUCUG  |
| ENSG00000126814 | GUCCAGA  |
| ENSG00000126814 | UCCUUGC  |
| ENSG00000126814 | UUAGAGA  |
| ENSG00000126814 | UUCCUAG  |
| ENSG00000126814 | UUGGAGG  |
| ENSG00000126821 | AAGGCAC  |
| ENSG00000126821 | UCACAGU  |
| ENSG00000126822 | AAAGUAC  |
| ENSG00000126822 | AAUUAAU  |
| ENSG00000126822 | AGUGGUU  |
| ENSG00000126822 | CAGCAGA  |
| ENSG00000126822 | CAGCAGG  |
| ENSG00000126822 | GCCUGGA  |
| ENSG00000126822 | UAUUGCU  |
| ENSG00000126822 | UGAAAUG  |
| ENSG00000126822 | UUGGCAA  |
| ENSG00000126858 | AAUACUG  |
| ENSG00000126858 | ACAGUAC  |
| ENSG00000126882 | AAAGUUU  |
| ENSG00000126882 | AAGGCAC  |
| ENSG00000126882 | AAGUGCU  |
| ENSG00000126882 | ACAGUAC  |
| ENSG00000126882 | AGUGCAA  |
| ENSG00000126882 | CAAAGCA  |
| ENSG00000126882 | CAAGAGC  |
| ENSG00000126882 | CACAGUG  |
| ENSG00000126882 | GCUGGAU  |
| ENSG00000126882 | GGUUGUC  |
| ENSG00000126882 | UAUUGCU  |
| ENSG00000126882 | UCACAGG  |
| ENSG00000126882 | UGCUGAC  |
| ENSG00000126882 | UGUGCUU  |
| ENSG00000126882 | UUGGCAC  |
| ENSG00000126883 | UAAUAGU  |
| ENSG00000126903 | CUUUGGU  |
| ENSG00000126903 | UGCAUAG  |
| ENSG00000126950 | AAAGAAU  |
| ENSG00000126950 | AAAUUUC  |
| ENSG00000126950 | ACACACU  |
| ENSG00000126950 | AGAUAAA  |
| ENSG00000126950 | CUGCUCA  |
| ENSG00000126950 | GAAGGUC  |
| ENSG00000126950 | GCAGCAU  |
| ENSG00000126950 | GCCUGGG  |
| ENSG00000126950 | UAUAAAAG |
| ENSG00000126950 | UGACAUC  |
| ENSG00000126952 | CCUUCUG  |
| ENSG00000126952 | GAGACCU  |
| ENSG00000127022 | AACACUG  |
| ENSG00000127022 | AAGGUGC  |
| ENSG00000127022 | ACUGUUU  |
| ENSG00000127022 | AGUGCAA  |
| ENSG00000127022 | CACUCCU  |

|                 |          |
|-----------------|----------|
| ENSG00000127022 | CAGUGCA  |
| ENSG00000127022 | CCUUCAU  |
| ENSG00000127022 | CUACAGU  |
| ENSG00000127022 | GGAGUGU  |
| ENSG00000127022 | GUCACUC  |
| ENSG00000127022 | UAUAAAAG |
| ENSG00000127022 | UGCAUAG  |
| ENSG00000127080 | AAAUUUC  |
| ENSG00000127080 | AACAUUC  |
| ENSG00000127080 | AAUUUUA  |
| ENSG00000127080 | ACAAUUAU |
| ENSG00000127080 | AGCAGCA  |
| ENSG00000127080 | AGCAGCG  |
| ENSG00000127080 | AGCAGCU  |
| ENSG00000127080 | AGUGCUG  |
| ENSG00000127080 | AGUCUU   |
| ENSG00000127080 | CAGUAGU  |
| ENSG00000127080 | CCAGUAC  |
| ENSG00000127080 | CCUGCUG  |
| ENSG00000127080 | GAGCCCU  |
| ENSG00000127080 | GGUGGUC  |
| ENSG00000127080 | GGUGGUU  |
| ENSG00000127080 | UCAUAGA  |
| ENSG00000127080 | UCCAGUU  |
| ENSG00000127080 | UUAGAGA  |
| ENSG00000127124 | AAGGCAC  |
| ENSG00000127124 | ACUGCAU  |
| ENSG00000127129 | ACAUUAC  |
| ENSG00000127152 | AAACUGU  |
| ENSG00000127152 | AAAGAAU  |
| ENSG00000127152 | AAAUCCC  |
| ENSG00000127152 | AAGACAU  |
| ENSG00000127152 | AAGGCAC  |
| ENSG00000127152 | AAGUCUU  |
| ENSG00000127152 | AAGUGCUC |
| ENSG00000127152 | AAUACUG  |
| ENSG00000127152 | AAUCUCA  |
| ENSG00000127152 | AAUGCCC  |
| ENSG00000127152 | ACACACC  |
| ENSG00000127152 | ACACACU  |
| ENSG00000127152 | ACAGUAC  |
| ENSG00000127152 | ACAGUAU  |
| ENSG00000127152 | ACUGCAG  |
| ENSG00000127152 | ACUGUAG  |
| ENSG00000127152 | AGCAGCG  |
| ENSG00000127152 | AGCUUAU  |
| ENSG00000127152 | AGUGCCG  |
| ENSG00000127152 | AUAAUAC  |
| ENSG00000127152 | AUACAAG  |
| ENSG00000127152 | AUAU AAC |
| ENSG00000127152 | AUAUUUAU |
| ENSG00000127152 | AUCCCUU  |
| ENSG00000127152 | AUGGCAC  |
| ENSG00000127152 | CAGCAGA  |
| ENSG00000127152 | CAGCAGG  |
| ENSG00000127152 | CAGUAGA  |
| ENSG00000127152 | CAGUUAC  |
| ENSG00000127152 | CCUGUAC  |
| ENSG00000127152 | CUAUACA  |
| ENSG00000127152 | CUUGUAU  |
| ENSG00000127152 | GAAAACA  |
| ENSG00000127152 | GAAUUGU  |
| ENSG00000127152 | GCUACAU  |
| ENSG00000127152 | GGAAUGU  |

|                 |          |
|-----------------|----------|
| ENSG00000127152 | GGCAGCG  |
| ENSG00000127152 | GGCAGUG  |
| ENSG00000127152 | GGGUCUU  |
| ENSG00000127152 | GUCAACA  |
| ENSG00000127152 | GUGAAUG  |
| ENSG00000127152 | GUGACAG  |
| ENSG00000127152 | UAAGACG  |
| ENSG00000127152 | UAAGACU  |
| ENSG00000127152 | UAAUAUC  |
| ENSG00000127152 | UAUUACC  |
| ENSG00000127152 | UAUUGCU  |
| ENSG00000127152 | UCAACAG  |
| ENSG00000127152 | UCAUACA  |
| ENSG00000127152 | UCCAGAG  |
| ENSG00000127152 | UCCCUUU  |
| ENSG00000127152 | UGCAUUG  |
| ENSG00000127152 | UGUAUGU  |
| ENSG00000127152 | UGUGCUU  |
| ENSG00000127152 | UGUGUCA  |
| ENSG00000127152 | UUCAAGC  |
| ENSG00000127152 | UUGUGUC  |
| ENSG00000127152 | UUUCAAC  |
| ENSG00000127152 | UUUGCAC  |
| ENSG00000127220 | ACAAGGU  |
| ENSG00000127220 | AGAUGUG  |
| ENSG00000127220 | GAUUGUC  |
| ENSG00000127220 | GCAGGUU  |
| ENSG00000127220 | GGAAGAC  |
| ENSG00000127241 | UCCUGAG  |
| ENSG00000127249 | UCCCUUU  |
| ENSG00000127314 | AACCUGU  |
| ENSG00000127314 | AACUACU  |
| ENSG00000127314 | AAGCGCU  |
| ENSG00000127314 | ACCACAG  |
| ENSG00000127314 | AGCCCUU  |
| ENSG00000127314 | AGUGGUU  |
| ENSG00000127314 | AUGUAAU  |
| ENSG00000127314 | CCCUGUU  |
| ENSG00000127314 | CUACAGU  |
| ENSG00000127314 | CUGGCUC  |
| ENSG00000127314 | CUUUGGU  |
| ENSG00000127314 | GACCCUG  |
| ENSG00000127314 | GCACCAU  |
| ENSG00000127314 | GCAGAAG  |
| ENSG00000127314 | GGCAUUG  |
| ENSG00000127314 | GUCUCUG  |
| ENSG00000127314 | UAAUGCU  |
| ENSG00000127314 | UCACAGU  |
| ENSG00000127314 | UCACAUU  |
| ENSG00000127314 | UCCUGU   |
| ENSG00000127314 | UCUCCAA  |
| ENSG00000127314 | UCUGGAG  |
| ENSG00000127314 | UGAGAAU  |
| ENSG00000127314 | UGCAAAG  |
| ENSG00000127314 | UGGACUG  |
| ENSG00000127314 | UUCUUGU  |
| ENSG00000127325 | AACUGGU  |
| ENSG00000127328 | AAGUCUU  |
| ENSG00000127328 | AGGAUGU  |
| ENSG00000127328 | AGUGUGC  |
| ENSG00000127328 | GUCACUC  |
| ENSG00000127328 | UGCAAAG  |
| ENSG00000127329 | AAAGCUG  |
| ENSG00000127329 | ACAAUUAU |

|                 |          |
|-----------------|----------|
| ENSG00000127329 | ACUGGCU  |
| ENSG00000127329 | CACAGUG  |
| ENSG00000127329 | CAGACAG  |
| ENSG00000127329 | CUCCAA   |
| ENSG00000127329 | GGAGUGU  |
| ENSG00000127329 | UCAACAG  |
| ENSG00000127329 | UCACAAG  |
| ENSG00000127329 | UCACACA  |
| ENSG00000127329 | UGAAAUG  |
| ENSG00000127334 | AAAAGUA  |
| ENSG00000127334 | AAAGUUU  |
| ENSG00000127334 | AAAUCCC  |
| ENSG00000127334 | AAAUUUC  |
| ENSG00000127334 | AACAAAC  |
| ENSG00000127334 | AACCUGU  |
| ENSG00000127334 | AAGACAU  |
| ENSG00000127334 | AAGGCAC  |
| ENSG00000127334 | AAUGCCC  |
| ENSG00000127334 | ACACACC  |
| ENSG00000127334 | ACACACU  |
| ENSG00000127334 | ACAUUCA  |
| ENSG00000127334 | ACUGUUU  |
| ENSG00000127334 | AGCAGCA  |
| ENSG00000127334 | CAA AUGC |
| ENSG00000127334 | CUUUGGU  |
| ENSG00000127334 | GAAAACA  |
| ENSG00000127334 | GAGGUAG  |
| ENSG00000127334 | GAGGUAU  |
| ENSG00000127334 | GCCUGU   |
| ENSG00000127334 | GGCUCAG  |
| ENSG00000127334 | UAAGACG  |
| ENSG00000127334 | UAAGACU  |
| ENSG00000127334 | UAUGGUU  |
| ENSG00000127334 | UCACAUU  |
| ENSG00000127334 | UCCUGAG  |
| ENSG00000127334 | UGCAGCU  |
| ENSG00000127334 | UGCCUG   |
| ENSG00000127334 | UUGAGGC  |
| ENSG00000127334 | UUGGCAA  |
| ENSG00000127337 | GUGCUUG  |
| ENSG00000127359 | AAAGUAU  |
| ENSG00000127359 | AAGGCAC  |
| ENSG00000127359 | ACAAGGU  |
| ENSG00000127359 | CAAAACU  |
| ENSG00000127359 | GAGGUAG  |
| ENSG00000127359 | GAGGUAU  |
| ENSG00000127359 | UAUUGCU  |
| ENSG00000127359 | UGAAAUG  |
| ENSG00000127359 | UUGGUCC  |
| ENSG00000127418 | AACAAAC  |
| ENSG00000127418 | AACUCUA  |
| ENSG00000127418 | AUAUUAU  |
| ENSG00000127418 | CUCAAAC  |
| ENSG00000127418 | UAAUAUC  |
| ENSG00000127445 | AAUACUG  |
| ENSG00000127445 | ACUGUGU  |
| ENSG00000127445 | AGUGGUU  |
| ENSG00000127452 | GAGGUAU  |
| ENSG00000127481 | AGAUAAA  |
| ENSG00000127481 | GGAAGCC  |
| ENSG00000127483 | AAAUUUC  |
| ENSG00000127483 | AACAAAC  |
| ENSG00000127483 | AAGACAU  |
| ENSG00000127483 | AUUCAUU  |

|                 |          |
|-----------------|----------|
| ENSG00000127483 | CACAGGG  |
| ENSG00000127483 | GGAAGCC  |
| ENSG00000127483 | GGAAUGU  |
| ENSG00000127483 | GGGAUCG  |
| ENSG00000127483 | GUGCCAC  |
| ENSG00000127483 | GUGCUUG  |
| ENSG00000127483 | UAAGACG  |
| ENSG00000127483 | UAAGACU  |
| ENSG00000127483 | UCCUAUA  |
| ENSG00000127483 | UCUCCAA  |
| ENSG00000127483 | UGGGAUC  |
| ENSG00000127483 | UGUGCUU  |
| ENSG00000127483 | UUCAAAU  |
| ENSG00000127483 | UUUCAAC  |
| ENSG00000127511 | CAAAACU  |
| ENSG00000127526 | AAGGUGC  |
| ENSG00000127526 | AUACAAG  |
| ENSG00000127526 | AUGCACC  |
| ENSG00000127526 | CCAGUGC  |
| ENSG00000127526 | CCAGUGU  |
| ENSG00000127526 | UCCAGUU  |
| ENSG00000127526 | UGUCUUU  |
| ENSG00000127554 | GGCUCUG  |
| ENSG00000127561 | AAAGAAU  |
| ENSG00000127561 | AUACAAG  |
| ENSG00000127561 | GGAAGCC  |
| ENSG00000127561 | GUCUUGC  |
| ENSG00000127564 | UUCAAAU  |
| ENSG00000127585 | AAUACUG  |
| ENSG00000127585 | ACAAUAU  |
| ENSG00000127585 | ACUGGCU  |
| ENSG00000127585 | AGGUUAU  |
| ENSG00000127585 | CUACAGU  |
| ENSG00000127585 | CUCUGGG  |
| ENSG00000127585 | CUGGAAA  |
| ENSG00000127585 | CUGUUGA  |
| ENSG00000127585 | CUUUGGU  |
| ENSG00000127585 | GACUUCC  |
| ENSG00000127585 | GGAAGAC  |
| ENSG00000127585 | GGAAGCC  |
| ENSG00000127585 | GGGGUCC  |
| ENSG00000127585 | GGGGUGG  |
| ENSG00000127585 | UAAUACA  |
| ENSG00000127585 | UAAUAUC  |
| ENSG00000127585 | UAUAAAAG |
| ENSG00000127585 | UCUGGAA  |
| ENSG00000127585 | UGCAUUG  |
| ENSG00000127585 | UGCCAGC  |
| ENSG00000127585 | UUCCUCG  |
| ENSG00000127603 | AAGGCAC  |
| ENSG00000127603 | ACUGCAU  |
| ENSG00000127603 | AGUAACA  |
| ENSG00000127603 | UCACACA  |
| ENSG00000127603 | UCACAUU  |
| ENSG00000127616 | CCAGUGC  |
| ENSG00000127616 | CCAGUGU  |
| ENSG00000127616 | CUACAGU  |
| ENSG00000127616 | GGAAUGU  |
| ENSG00000127688 | AUUGCAC  |
| ENSG00000127688 | GAGGUAU  |
| ENSG00000127688 | GUAAACA  |
| ENSG00000127688 | GUGCUUG  |
| ENSG00000127688 | UAUUGCU  |
| ENSG00000127688 | UGUGCUU  |

|                 |          |
|-----------------|----------|
| ENSG00000127688 | UUGGCAA  |
| ENSG00000127804 | CAAAGCA  |
| ENSG00000127804 | GAAGGAA  |
| ENSG00000127804 | GUGCCUG  |
| ENSG00000127804 | UUGAUCA  |
| ENSG00000127837 | CACACCG  |
| ENSG00000127837 | CACACCU  |
| ENSG00000127837 | CACCAGC  |
| ENSG00000127837 | CUCACAC  |
| ENSG00000127838 | AAGGCAC  |
| ENSG00000127838 | ACUGUGU  |
| ENSG00000127838 | CAGUCCA  |
| ENSG00000127838 | CCCCUGG  |
| ENSG00000127838 | GAGGUAG  |
| ENSG00000127838 | UAUUGCU  |
| ENSG00000127838 | UUGGCAA  |
| ENSG00000127863 | AAAGUAA  |
| ENSG00000127863 | AAAGUAC  |
| ENSG00000127863 | CAGCUGG  |
| ENSG00000127863 | CCAGUAC  |
| ENSG00000127863 | CUCCAGC  |
| ENSG00000127863 | GUCCAGA  |
| ENSG00000127863 | UCACAAG  |
| ENSG00000127870 | AAAGUGC  |
| ENSG00000127870 | AAGUGCU  |
| ENSG00000127870 | AGUGCUU  |
| ENSG00000127870 | GAUUGUC  |
| ENSG00000127914 | UUGUGAC  |
| ENSG00000127946 | AAAAACC  |
| ENSG00000127946 | AAGGCAC  |
| ENSG00000127946 | AGAUAAA  |
| ENSG00000127946 | AGCACCA  |
| ENSG00000127946 | AGUGAUC  |
| ENSG00000127946 | AUGAUGA  |
| ENSG00000127946 | CACAGUG  |
| ENSG00000127946 | CUCACAC  |
| ENSG00000127946 | GGAAGAC  |
| ENSG00000127946 | GGGGUCC  |
| ENSG00000127946 | UCACAGG  |
| ENSG00000127946 | UCACAGU  |
| ENSG00000127946 | UGAGAAG  |
| ENSG00000127947 | AAAAAUC  |
| ENSG00000127947 | AACCUGG  |
| ENSG00000127947 | AACCUGU  |
| ENSG00000127947 | AGGCAGG  |
| ENSG00000127947 | AUACCUC  |
| ENSG00000127947 | CCUGUAC  |
| ENSG00000127947 | CUACAAA  |
| ENSG00000127947 | CUUACAG  |
| ENSG00000127947 | GACCAUG  |
| ENSG00000127947 | GUAACAG  |
| ENSG00000127948 | AAUUAAU  |
| ENSG00000127948 | GAAAACA  |
| ENSG00000127951 | CAGUAGU  |
| ENSG00000127954 | AAAGUUU  |
| ENSG00000127954 | GAAGGAA  |
| ENSG00000127954 | GAAGGUC  |
| ENSG00000127954 | UUUGCAC  |
| ENSG00000127995 | UAUAAAAG |
| ENSG00000127995 | UCACAUU  |
| ENSG00000127995 | UUCAAAU  |
| ENSG00000128011 | AAAGUUU  |
| ENSG00000128011 | AAGGCAC  |
| ENSG00000128011 | AGUGCUG  |

|                 |          |
|-----------------|----------|
| ENSG00000128011 | AUACAAG  |
| ENSG00000128011 | CAGUGCA  |
| ENSG00000128011 | CGUGUCU  |
| ENSG00000128011 | CUAGUCC  |
| ENSG00000128011 | GCGGAGG  |
| ENSG00000128011 | GGACCUG  |
| ENSG00000128011 | GGGCCCC  |
| ENSG00000128011 | UUGGAGG  |
| ENSG00000128011 | UUGGUUC  |
| ENSG00000128016 | AAAAAUC  |
| ENSG00000128016 | AGCACCA  |
| ENSG00000128016 | AUAAAGU  |
| ENSG00000128016 | AUAUAAC  |
| ENSG00000128016 | CGACCCA  |
| ENSG00000128016 | CUGCCCC  |
| ENSG00000128016 | GCUACAU  |
| ENSG00000128016 | GUUAAUG  |
| ENSG00000128016 | UACAAAG  |
| ENSG00000128016 | UCACAGG  |
| ENSG00000128016 | UCACAGU  |
| ENSG00000128016 | UUGGCAA  |
| ENSG00000128045 | AAGUGCA  |
| ENSG00000128045 | CAAAGCA  |
| ENSG00000128045 | UCUGGAA  |
| ENSG00000128052 | AGCAGCA  |
| ENSG00000128052 | AUAUUAU  |
| ENSG00000128052 | CCAGCAU  |
| ENSG00000128052 | GAAGGAA  |
| ENSG00000128052 | GUGAAUG  |
| ENSG00000128052 | GUGCCAC  |
| ENSG00000128052 | UAAUAUC  |
| ENSG00000128052 | UACAAAG  |
| ENSG00000128059 | CUUUGGU  |
| ENSG00000128059 | GGUUUAC  |
| ENSG00000128059 | UCCUGU   |
| ENSG00000128059 | UUGGUUC  |
| ENSG00000128191 | AAAACUG  |
| ENSG00000128191 | CUGGCUC  |
| ENSG00000128191 | CUUUGGU  |
| ENSG00000128191 | GGAGGCA  |
| ENSG00000128191 | GGCAAGA  |
| ENSG00000128191 | UAAGACU  |
| ENSG00000128191 | UUGGUUC  |
| ENSG00000128203 | AUACAAG  |
| ENSG00000128228 | AACAUUC  |
| ENSG00000128228 | AAGGCAC  |
| ENSG00000128228 | CUACAAA  |
| ENSG00000128242 | AAUACUG  |
| ENSG00000128245 | AGCAGCA  |
| ENSG00000128245 | GCAGCAU  |
| ENSG00000128254 | GAGCCCC  |
| ENSG00000128266 | AAAGAAU  |
| ENSG00000128266 | AUGUGGG  |
| ENSG00000128266 | CACAGGG  |
| ENSG00000128266 | CAGCAA   |
| ENSG00000128266 | CAGCUGG  |
| ENSG00000128266 | GUUCAUG  |
| ENSG00000128266 | UAUAAAG  |
| ENSG00000128266 | UCACAGG  |
| ENSG00000128266 | UGCAUUAU |
| ENSG00000128266 | UGGCCAC  |
| ENSG00000128266 | UUUUUGC  |
| ENSG00000128268 | AAUACUG  |
| ENSG00000128268 | ACACACC  |

|                 |          |
|-----------------|----------|
| ENSG00000128268 | AGCAGCU  |
| ENSG00000128268 | AUAUUAU  |
| ENSG00000128268 | AUGCACC  |
| ENSG00000128268 | CCAGUGU  |
| ENSG00000128268 | CUUCUCU  |
| ENSG00000128268 | GGGGAGC  |
| ENSG00000128268 | UAAUAUC  |
| ENSG00000128268 | UACAAAG  |
| ENSG00000128268 | UGAAAUG  |
| ENSG00000128271 | AGCAGCA  |
| ENSG00000128271 | CUCCAGC  |
| ENSG00000128271 | GAAGGAA  |
| ENSG00000128271 | GCAGGAC  |
| ENSG00000128283 | GGGGUGG  |
| ENSG00000128285 | AUGAUGC  |
| ENSG00000128285 | GGCAGGG  |
| ENSG00000128294 | AUAUUAU  |
| ENSG00000128298 | CUGGGCA  |
| ENSG00000128298 | UACAAAG  |
| ENSG00000128340 | GGGGUGC  |
| ENSG00000128342 | AAAAAUC  |
| ENSG00000128342 | AAAGUGC  |
| ENSG00000128342 | AAGUGCU  |
| ENSG00000128342 | AGCACCA  |
| ENSG00000128342 | AGCAGCU  |
| ENSG00000128342 | AGGAGCU  |
| ENSG00000128342 | AUGACAC  |
| ENSG00000128342 | CUGCCCC  |
| ENSG00000128342 | GACCCUG  |
| ENSG00000128342 | GAGACCU  |
| ENSG00000128342 | GAGCUGC  |
| ENSG00000128342 | GCCUGGG  |
| ENSG00000128342 | GCUUCCU  |
| ENSG00000128342 | GUAACAG  |
| ENSG00000128342 | GUCAGUU  |
| ENSG00000128342 | GUCUGCC  |
| ENSG00000128342 | UAAUAUC  |
| ENSG00000128342 | UCAAGUA  |
| ENSG00000128342 | UCUGGAA  |
| ENSG00000128342 | UGCCAGC  |
| ENSG00000128346 | UCCCUCU  |
| ENSG00000128422 | GAGGCUG  |
| ENSG00000128422 | GUCAACA  |
| ENSG00000128463 | ACAUUAC  |
| ENSG00000128510 | ACACACC  |
| ENSG00000128510 | GAGGUUAU |
| ENSG00000128510 | GCAGGAC  |
| ENSG00000128510 | GGAAUGU  |
| ENSG00000128510 | UUAGGAU  |
| ENSG00000128512 | ACAAGGU  |
| ENSG00000128512 | ACAUUCA  |
| ENSG00000128512 | ACUGCAG  |
| ENSG00000128512 | AGUGCCU  |
| ENSG00000128512 | GUGCAA   |
| ENSG00000128512 | UUGGCAA  |
| ENSG00000128512 | UUGGCAC  |
| ENSG00000128563 | GGCUCAG  |
| ENSG00000128564 | CAAAACU  |
| ENSG00000128564 | GAGGGGC  |
| ENSG00000128564 | UUCCUCG  |
| ENSG00000128567 | AACAUUC  |
| ENSG00000128567 | ACAUUCA  |
| ENSG00000128567 | CAGCAA   |
| ENSG00000128567 | CAGUGCA  |



|                 |         |
|-----------------|---------|
| ENSG00000128567 | CCAGUGC |
| ENSG00000128567 | CCCUGUC |
| ENSG00000128567 | CUCCAGC |
| ENSG00000128567 | CUGGGCA |
| ENSG00000128567 | GAUUGUC |
| ENSG00000128567 | GCAACUU |
| ENSG00000128567 | GCUGUCU |
| ENSG00000128567 | GGCAGUG |
| ENSG00000128567 | UACAAAG |
| ENSG00000128567 | UUGGCAA |
| ENSG00000128567 | UUGGCAC |
| ENSG00000128573 | AAAAACC |
| ENSG00000128573 | AAAAAUC |
| ENSG00000128573 | AAAUGGU |
| ENSG00000128573 | AACACUG |
| ENSG00000128573 | AACAGUC |
| ENSG00000128573 | AACUACU |
| ENSG00000128573 | ACAUUAC |
| ENSG00000128573 | ACCAGCA |
| ENSG00000128573 | AGGUAGU |
| ENSG00000128573 | AGUGGUU |
| ENSG00000128573 | AUACAAG |
| ENSG00000128573 | AUUCAUU |
| ENSG00000128573 | AUUGCAC |
| ENSG00000128573 | CAAAGCA |
| ENSG00000128573 | CACAGUG |
| ENSG00000128573 | CAGCAGG |
| ENSG00000128573 | CAUGGAU |
| ENSG00000128573 | CUUUGGU |
| ENSG00000128573 | GAGUUGG |
| ENSG00000128573 | GAUAUGU |
| ENSG00000128573 | GGAGUGU |
| ENSG00000128573 | GGCAGUG |
| ENSG00000128573 | GGCUGCG |
| ENSG00000128573 | GGUAGAC |
| ENSG00000128573 | GGUUGUC |
| ENSG00000128573 | GUGCUUG |
| ENSG00000128573 | GUUCAUG |
| ENSG00000128573 | UAUAUGA |
| ENSG00000128573 | UCACAAG |
| ENSG00000128573 | UCAUGAU |
| ENSG00000128573 | UGACUGU |
| ENSG00000128573 | UGCAGCU |
| ENSG00000128573 | UGGCCAC |
| ENSG00000128573 | UGGCUGC |
| ENSG00000128573 | UUAGGAU |
| ENSG00000128573 | UUGGCAA |
| ENSG00000128573 | UUGGCAC |
| ENSG00000128573 | UUGGUUC |
| ENSG00000128578 | UUCUGCA |
| ENSG00000128585 | AUCCCUU |
| ENSG00000128585 | CAGACAG |
| ENSG00000128585 | CUACAAA |
| ENSG00000128585 | CUUUGGU |
| ENSG00000128585 | GAGAAAU |
| ENSG00000128585 | GGGAUCG |
| ENSG00000128585 | GUCUCUG |
| ENSG00000128585 | GUGUGGC |
| ENSG00000128585 | UCCUAUA |
| ENSG00000128585 | UGAAGCU |
| ENSG00000128585 | UGGCCAC |
| ENSG00000128585 | UGGUACC |
| ENSG00000128585 | UUCUGCA |
| ENSG00000128585 | UUCUUGU |

|                 |          |
|-----------------|----------|
| ENSG00000128590 | AAGUGCA  |
| ENSG00000128590 | ACUGGCC  |
| ENSG00000128590 | ACUGGCU  |
| ENSG00000128590 | AGAUAAA  |
| ENSG00000128590 | GAGGUAG  |
| ENSG00000128590 | GAGGUAU  |
| ENSG00000128590 | GCAGAAG  |
| ENSG00000128590 | UAAUACA  |
| ENSG00000128590 | UAAUAUC  |
| ENSG00000128590 | UCACAGG  |
| ENSG00000128590 | UCACAGU  |
| ENSG00000128590 | UUGGCAA  |
| ENSG00000128591 | AAAGCUG  |
| ENSG00000128591 | CUCACAC  |
| ENSG00000128591 | GGAGGCA  |
| ENSG00000128591 | UCACACA  |
| ENSG00000128594 | AAAGCUG  |
| ENSG00000128594 | AAAUUUC  |
| ENSG00000128594 | ACAAUUAU |
| ENSG00000128594 | ACAGGUG  |
| ENSG00000128594 | ACAUCAC  |
| ENSG00000128594 | ACAUUAC  |
| ENSG00000128594 | ACUGCAG  |
| ENSG00000128594 | AUAUAAC  |
| ENSG00000128594 | AUUGCAC  |
| ENSG00000128594 | CUGCAGG  |
| ENSG00000128594 | CUGCCCC  |
| ENSG00000128594 | GAGAAAU  |
| ENSG00000128594 | GCAGGAC  |
| ENSG00000128594 | UAUUGCU  |
| ENSG00000128594 | UCACAUU  |
| ENSG00000128594 | UCUCACC  |
| ENSG00000128594 | UGACAUC  |
| ENSG00000128594 | UGCAAAG  |
| ENSG00000128594 | UGCAUUG  |
| ENSG00000128594 | UUCAAAU  |
| ENSG00000128595 | AACACUG  |
| ENSG00000128595 | AAGGCAC  |
| ENSG00000128595 | AAUACUG  |
| ENSG00000128595 | AGCAGCA  |
| ENSG00000128595 | AGUGGUU  |
| ENSG00000128595 | CAGUAGA  |
| ENSG00000128595 | CAGUAGU  |
| ENSG00000128595 | CUCAAAC  |
| ENSG00000128595 | CUCCCAA  |
| ENSG00000128595 | GAGGAUA  |
| ENSG00000128595 | GAGGUAG  |
| ENSG00000128595 | GAGGUAU  |
| ENSG00000128595 | GGAAGAC  |
| ENSG00000128595 | GGAGGAG  |
| ENSG00000128595 | GUGCUUG  |
| ENSG00000128596 | GGGUAAG  |
| ENSG00000128596 | UGGGUAC  |
| ENSG00000128602 | GAAGGAA  |
| ENSG00000128602 | UCCCACA  |
| ENSG00000128602 | UGAAGCU  |
| ENSG00000128604 | AGCUGCC  |
| ENSG00000128604 | GCUUCCU  |
| ENSG00000128604 | UGCCAGC  |
| ENSG00000128641 | GGUUUAC  |
| ENSG00000128641 | UAUUGCU  |
| ENSG00000128645 | AGCAGCA  |
| ENSG00000128645 | AGCAGCG  |
| ENSG00000128645 | AGCAGCU  |

|                 |          |
|-----------------|----------|
| ENSG00000128645 | AGUGCAA  |
| ENSG00000128645 | CCCUGAG  |
| ENSG00000128645 | CUUUGGU  |
| ENSG00000128645 | GAGGUAG  |
| ENSG00000128645 | GAUUGUA  |
| ENSG00000128645 | GUGCAA   |
| ENSG00000128645 | UAUUACC  |
| ENSG00000128645 | UCCCUGU  |
| ENSG00000128645 | UUGGUCC  |
| ENSG00000128652 | AACUACU  |
| ENSG00000128652 | CACCAGC  |
| ENSG00000128655 | AAAAACC  |
| ENSG00000128655 | AAAACUG  |
| ENSG00000128655 | ACAUUCA  |
| ENSG00000128655 | ACUGGCU  |
| ENSG00000128655 | AGAUGUG  |
| ENSG00000128655 | AGGGUUG  |
| ENSG00000128655 | AUGGCAC  |
| ENSG00000128655 | AUGUGGG  |
| ENSG00000128655 | CAGCAGA  |
| ENSG00000128655 | CAGUAGA  |
| ENSG00000128655 | CAGUAGU  |
| ENSG00000128655 | CUGCAGC  |
| ENSG00000128655 | CUGCAGG  |
| ENSG00000128655 | GAGAAAU  |
| ENSG00000128655 | GCAGAAG  |
| ENSG00000128655 | GGAGGCA  |
| ENSG00000128655 | GGCUCUG  |
| ENSG00000128655 | GGUUGAC  |
| ENSG00000128655 | UACAAAG  |
| ENSG00000128655 | UCCUAUA  |
| ENSG00000128655 | UGAAAUG  |
| ENSG00000128655 | UGACAUC  |
| ENSG00000128655 | UGGGACA  |
| ENSG00000128655 | UGUCUGG  |
| ENSG00000128655 | UGUUGAA  |
| ENSG00000128655 | UUCUUGU  |
| ENSG00000128655 | UUGGCAA  |
| ENSG00000128655 | UUGUUCG  |
| ENSG00000128656 | GAAACAU  |
| ENSG00000128683 | AUACAAG  |
| ENSG00000128683 | AUAU AAC |
| ENSG00000128683 | CUUUGGU  |
| ENSG00000128683 | GGCUCAG  |
| ENSG00000128709 | CCCUGAG  |
| ENSG00000128710 | ACCCUGU  |
| ENSG00000128710 | AUUGCAC  |
| ENSG00000128710 | GUGCUUG  |
| ENSG00000128710 | UAUUGCU  |
| ENSG00000128710 | UGCAGCU  |
| ENSG00000128714 | AAGUCUU  |
| ENSG00000128714 | ACUGGCU  |
| ENSG00000128714 | GAUUGUC  |
| ENSG00000128714 | GCCUGGA  |
| ENSG00000128714 | GGGGGAA  |
| ENSG00000128714 | UCACAAG  |
| ENSG00000128731 | AUUGCAC  |
| ENSG00000128791 | AUUCAUU  |
| ENSG00000128829 | AAAUUUC  |
| ENSG00000128829 | AACAUUC  |
| ENSG00000128829 | AUAUUAU  |
| ENSG00000128829 | UAUAUGA  |
| ENSG00000128849 | AGCAGCA  |
| ENSG00000128849 | CCCCCAG  |

|                 |          |
|-----------------|----------|
| ENSG00000128849 | CUGCUC   |
| ENSG00000128849 | GAGGUAG  |
| ENSG00000128849 | GAUUGUA  |
| ENSG00000128849 | GUGCCUG  |
| ENSG00000128872 | AAAUGGU  |
| ENSG00000128872 | ACUCAAA  |
| ENSG00000128872 | UCACAGG  |
| ENSG00000128872 | UUGGCAA  |
| ENSG00000128881 | AACACUG  |
| ENSG00000128881 | UUGGCAA  |
| ENSG00000128881 | UUGGCAC  |
| ENSG00000128881 | UUUCAAC  |
| ENSG00000128886 | AGCAGCU  |
| ENSG00000128891 | UCACACA  |
| ENSG00000128891 | UGAUCCA  |
| ENSG00000128891 | UGGGACA  |
| ENSG00000128915 | AAAGAGC  |
| ENSG00000128915 | AAGGCAC  |
| ENSG00000128915 | GGAUGAG  |
| ENSG00000128915 | UCCUGU   |
| ENSG00000128917 | AAGGCAC  |
| ENSG00000128917 | AAUGUUG  |
| ENSG00000128917 | AAUUUUU  |
| ENSG00000128917 | AGCAGCA  |
| ENSG00000128917 | AGUGCUU  |
| ENSG00000128917 | AUACAAG  |
| ENSG00000128917 | AUAUUUU  |
| ENSG00000128917 | CACAGUG  |
| ENSG00000128917 | CAGUCUG  |
| ENSG00000128917 | CAGUGCA  |
| ENSG00000128917 | GAAGGAA  |
| ENSG00000128917 | UAUAAAAG |
| ENSG00000128917 | UCACAGG  |
| ENSG00000128917 | UCACAGU  |
| ENSG00000128917 | UCCUGAG  |
| ENSG00000128917 | UGCAUAG  |
| ENSG00000128918 | ACAAUUU  |
| ENSG00000128918 | AUGAGCU  |
| ENSG00000128918 | UAUAAAAG |
| ENSG00000128918 | UGGAUAA  |
| ENSG00000128923 | AAAGUUU  |
| ENSG00000128923 | AAGUGCA  |
| ENSG00000128923 | AGCAGCG  |
| ENSG00000128923 | AGCAGCU  |
| ENSG00000128923 | AGCUUUU  |
| ENSG00000128923 | CUUUGGU  |
| ENSG00000128923 | GAAGGAA  |
| ENSG00000128923 | GACCCUG  |
| ENSG00000128923 | GAUUGUC  |
| ENSG00000128923 | GCUGGUG  |
| ENSG00000128923 | GUCACUC  |
| ENSG00000128923 | GUGCUUG  |
| ENSG00000128923 | UCCAGAG  |
| ENSG00000128923 | UUGGUUC  |
| ENSG00000128965 | AGCAGCA  |
| ENSG00000128965 | AGCAGCG  |
| ENSG00000128965 | AGCAGCU  |
| ENSG00000128965 | CAGCAGA  |
| ENSG00000128965 | CAGCAGG  |
| ENSG00000128965 | CUUGGAG  |
| ENSG00000128965 | UUCAAGC  |
| ENSG00000129003 | AAGUGCA  |
| ENSG00000129007 | AAAAGUA  |
| ENSG00000129007 | AAAGUAC  |

|                 |         |
|-----------------|---------|
| ENSG00000129007 | AACAAAC |
| ENSG00000129007 | AGUGUGC |
| ENSG00000129007 | AUGCAUU |
| ENSG00000129007 | AUGUAAU |
| ENSG00000129007 | AUUCAUU |
| ENSG00000129007 | CACAAUG |
| ENSG00000129007 | CAGUUAC |
| ENSG00000129007 | GCUGGUG |
| ENSG00000129007 | GGUGGUC |
| ENSG00000129007 | GGUGGUU |
| ENSG00000129007 | GUUAAUG |
| ENSG00000129007 | UAUUACC |
| ENSG00000129007 | UGCAUUG |
| ENSG00000129007 | UGUCUUU |
| ENSG00000129007 | UGUGCUU |
| ENSG00000129007 | UUCAAAU |
| ENSG00000129007 | UUCCAUA |
| ENSG00000129038 | CCCUGAG |
| ENSG00000129038 | UCCUGU  |
| ENSG00000129048 | UUAGGAU |
| ENSG00000129071 | UGCAAAG |
| ENSG00000129116 | AAAGUAC |
| ENSG00000129116 | AAAGUGC |
| ENSG00000129116 | AAGUGCU |
| ENSG00000129116 | AGUGCUG |
| ENSG00000129116 | CAGGUGA |
| ENSG00000129116 | CUAGUCC |
| ENSG00000129116 | GAGCUAA |
| ENSG00000129152 | AAAAGUA |
| ENSG00000129152 | AAAGUAU |
| ENSG00000129152 | AGAUAAA |
| ENSG00000129152 | CAAAGCA |
| ENSG00000129152 | UACAAAG |
| ENSG00000129159 | AAAAAUC |
| ENSG00000129159 | AAAACUG |
| ENSG00000129159 | AACUCUA |
| ENSG00000129159 | AAUUUUA |
| ENSG00000129159 | ACUCAGG |
| ENSG00000129159 | ACUGUUU |
| ENSG00000129159 | AGAUAAA |
| ENSG00000129159 | AGCUGCC |
| ENSG00000129159 | AUGUGCC |
| ENSG00000129159 | CAAAGCA |
| ENSG00000129159 | CACACCU |
| ENSG00000129159 | CACCAGC |
| ENSG00000129159 | CAGUCUG |
| ENSG00000129159 | CAUGGGU |
| ENSG00000129159 | CCAGCAU |
| ENSG00000129159 | CCCCCAG |
| ENSG00000129159 | CUGACUC |
| ENSG00000129159 | CUGGAAA |
| ENSG00000129159 | CUUCUCU |
| ENSG00000129159 | GAGAAAU |
| ENSG00000129159 | GAGAACC |
| ENSG00000129159 | GAGAUGA |
| ENSG00000129159 | GAGCCCC |
| ENSG00000129159 | GAGGCUG |
| ENSG00000129159 | GAGGUAG |
| ENSG00000129159 | GAGUUGA |
| ENSG00000129159 | GCAGGAC |
| ENSG00000129159 | GCAGGUU |
| ENSG00000129159 | GGAGAGA |
| ENSG00000129159 | GGCAGCG |
| ENSG00000129159 | GGGGUGG |

|                 |         |
|-----------------|---------|
| ENSG00000129159 | GGGUUUA |
| ENSG00000129159 | GGUAGAC |
| ENSG00000129159 | GUGGCC  |
| ENSG00000129159 | UAUUGCU |
| ENSG00000129159 | UCACAGG |
| ENSG00000129159 | UCUAGAG |
| ENSG00000129159 | UCUGGAA |
| ENSG00000129159 | UGAAAGG |
| ENSG00000129159 | UGAAAUG |
| ENSG00000129159 | UUGGAGG |
| ENSG00000129159 | UUGGUUC |
| ENSG00000129173 | AAAGUUU |
| ENSG00000129187 | AAUUAUU |
| ENSG00000129187 | UGAAAGG |
| ENSG00000129194 | GCCUGGG |
| ENSG00000129204 | AAAUUUC |
| ENSG00000129204 | AACUCUA |
| ENSG00000129204 | AAGUGCA |
| ENSG00000129204 | ACAUCAC |
| ENSG00000129204 | AGAUAAA |
| ENSG00000129204 | AGCCCUU |
| ENSG00000129204 | AGUAGAC |
| ENSG00000129204 | AGUGCAA |
| ENSG00000129204 | AUACAAG |
| ENSG00000129204 | CAGGAAC |
| ENSG00000129204 | CAUAUUG |
| ENSG00000129204 | GAGGUAG |
| ENSG00000129204 | UACAGUU |
| ENSG00000129204 | UGCAUUG |
| ENSG00000129204 | UGUGCUU |
| ENSG00000129204 | UUCUAAU |
| ENSG00000129219 | UACAAAG |
| ENSG00000129235 | GUUAAUG |
| ENSG00000129244 | ACAGUAC |
| ENSG00000129244 | ACAGUAU |
| ENSG00000129244 | ACUGCAG |
| ENSG00000129244 | AGGGAGG |
| ENSG00000129244 | AUAUAAC |
| ENSG00000129244 | CAAAGUG |
| ENSG00000129244 | CAGUAGA |
| ENSG00000129244 | CCCCCAG |
| ENSG00000129244 | GGCAGGG |
| ENSG00000129244 | GGGGGAA |
| ENSG00000129244 | UACAGUU |
| ENSG00000129244 | UGGCCAC |
| ENSG00000129245 | AAGGCAC |
| ENSG00000129245 | ACAAGGU |
| ENSG00000129245 | ACCCUGU |
| ENSG00000129245 | ACUGUAG |
| ENSG00000129245 | AGCAGCU |
| ENSG00000129245 | CACAGUG |
| ENSG00000129245 | CAGUCUG |
| ENSG00000129245 | CCCACCG |
| ENSG00000129245 | CCCACCU |
| ENSG00000129245 | CCCCUGG |
| ENSG00000129245 | CCCUGUU |
| ENSG00000129245 | CUCCAGC |
| ENSG00000129245 | CUCCCAC |
| ENSG00000129245 | GAGGAUA |
| ENSG00000129245 | GGAGGAG |
| ENSG00000129245 | GGGUGUU |
| ENSG00000129245 | GUGCCAC |
| ENSG00000129245 | UCAUACA |
| ENSG00000129245 | UCCCACC |

|                 |         |
|-----------------|---------|
| ENSG00000129250 | AACACUG |
| ENSG00000129250 | ACCACAG |
| ENSG00000129250 | AGCAGCA |
| ENSG00000129250 | AGCAGCU |
| ENSG00000129250 | CAGACAG |
| ENSG00000129250 | CUUUGGU |
| ENSG00000129250 | UUGGUUC |
| ENSG00000129255 | ACCAGCA |
| ENSG00000129255 | CACCAGC |
| ENSG00000129255 | CAGGAAC |
| ENSG00000129255 | GGCCUG  |
| ENSG00000129255 | GGGUCC  |
| ENSG00000129270 | CACCAGC |
| ENSG00000129277 | CAGGUGA |
| ENSG00000129292 | AAAACUG |
| ENSG00000129292 | AAAGCUG |
| ENSG00000129292 | AAAGGUA |
| ENSG00000129292 | ACAGUAC |
| ENSG00000129292 | ACAGUAU |
| ENSG00000129292 | ACUAGAU |
| ENSG00000129292 | AGAUAAA |
| ENSG00000129292 | AUGUGGG |
| ENSG00000129292 | CAAAACU |
| ENSG00000129292 | CAAGAGC |
| ENSG00000129292 | CACUCCU |
| ENSG00000129292 | CAGUCUG |
| ENSG00000129292 | CCAGCAU |
| ENSG00000129292 | CUAGGCU |
| ENSG00000129292 | CUUUGGU |
| ENSG00000129292 | GAGCUAA |
| ENSG00000129292 | GAGGCAG |
| ENSG00000129292 | GCAACUU |
| ENSG00000129292 | GUAUUCU |
| ENSG00000129292 | GUCACUC |
| ENSG00000129292 | UAAUAUC |
| ENSG00000129292 | UCAAGUA |
| ENSG00000129292 | UCAUGAU |
| ENSG00000129292 | UGAAGCU |
| ENSG00000129292 | UUCAAAU |
| ENSG00000129292 | UUGGCAA |
| ENSG00000129292 | UUGGUUC |
| ENSG00000129347 | ACUGUAG |
| ENSG00000129347 | CUCAGGG |
| ENSG00000129347 | CUGACUC |
| ENSG00000129347 | UUUGCAC |
| ENSG00000129351 | AACUCUA |
| ENSG00000129351 | AAGUUGU |
| ENSG00000129351 | ACAUUCA |
| ENSG00000129351 | ACUCAA  |
| ENSG00000129351 | CAGACAG |
| ENSG00000129351 | CUUCACC |
| ENSG00000129351 | GAAACAU |
| ENSG00000129351 | GCCUGAU |
| ENSG00000129351 | GGACGGA |
| ENSG00000129351 | GGAGUCC |
| ENSG00000129351 | GUCUACU |
| ENSG00000129351 | UAUAAAG |
| ENSG00000129351 | UCACAAG |
| ENSG00000129351 | UCACAGG |
| ENSG00000129351 | UCCACA  |
| ENSG00000129351 | UCCACC  |
| ENSG00000129353 | AAGGCAC |
| ENSG00000129353 | GGAAUGU |
| ENSG00000129353 | GGCAGUG |

|                 |          |
|-----------------|----------|
| ENSG00000129353 | UCCAUA   |
| ENSG00000129353 | UUGGCAC  |
| ENSG00000129354 | AAGGCAC  |
| ENSG00000129355 | AACCGUU  |
| ENSG00000129355 | AAGUCUU  |
| ENSG00000129422 | AAGUGCA  |
| ENSG00000129422 | AAUACUG  |
| ENSG00000129422 | AGGUUUAU |
| ENSG00000129422 | AGUGCUU  |
| ENSG00000129422 | CCCUGAG  |
| ENSG00000129422 | CUACAAA  |
| ENSG00000129422 | CUGGAAA  |
| ENSG00000129422 | GAGGUAG  |
| ENSG00000129422 | GUGCAAA  |
| ENSG00000129422 | UCCAGUU  |
| ENSG00000129422 | UUGGUUC  |
| ENSG00000129451 | AGCAGCU  |
| ENSG00000129451 | AGUGGUU  |
| ENSG00000129451 | GGGUGGU  |
| ENSG00000129451 | UCACACA  |
| ENSG00000129472 | AAAGAGG  |
| ENSG00000129472 | GUGCAAA  |
| ENSG00000129472 | UGCAUUAU |
| ENSG00000129473 | AAAGUGC  |
| ENSG00000129473 | AAGACAU  |
| ENSG00000129473 | AAGUGCA  |
| ENSG00000129473 | ACCCUGU  |
| ENSG00000129473 | ACUGGCC  |
| ENSG00000129473 | AGCACCA  |
| ENSG00000129473 | AGUGGUU  |
| ENSG00000129473 | AUGGCUU  |
| ENSG00000129473 | CAAUUGC  |
| ENSG00000129473 | CAAGAGC  |
| ENSG00000129473 | CAGCAAA  |
| ENSG00000129473 | CAGCAGA  |
| ENSG00000129473 | CAGCAGG  |
| ENSG00000129473 | CAGUCCA  |
| ENSG00000129473 | CCCACCU  |
| ENSG00000129473 | CCCUGAG  |
| ENSG00000129473 | CUCAGGG  |
| ENSG00000129473 | CUCUGGG  |
| ENSG00000129473 | CUGGACU  |
| ENSG00000129473 | CUGGCUC  |
| ENSG00000129473 | CUGGGCA  |
| ENSG00000129473 | GAGAACC  |
| ENSG00000129473 | GAGCUAA  |
| ENSG00000129473 | GCAGCAU  |
| ENSG00000129473 | GCAGGAC  |
| ENSG00000129473 | GGCAGGG  |
| ENSG00000129473 | GGCUCAG  |
| ENSG00000129473 | GGGAGCU  |
| ENSG00000129473 | GGGGAGC  |
| ENSG00000129473 | GUCUCUG  |
| ENSG00000129473 | GUGAGGU  |
| ENSG00000129473 | GUGGGGA  |
| ENSG00000129473 | UAAUACA  |
| ENSG00000129473 | UAUAAAG  |
| ENSG00000129473 | UCCUGU   |
| ENSG00000129473 | UCCUGAG  |
| ENSG00000129473 | UCUAGAG  |
| ENSG00000129473 | UCUCAAG  |
| ENSG00000129473 | UUGGUCC  |
| ENSG00000129474 | AAAGUGC  |
| ENSG00000129474 | AAGUGCU  |



|                 |          |
|-----------------|----------|
| ENSG00000129474 | AGUGCUG  |
| ENSG00000129474 | CAAAGUG  |
| ENSG00000129474 | CUUUGGU  |
| ENSG00000129474 | GGGUCUU  |
| ENSG00000129480 | AGCCAGU  |
| ENSG00000129480 | AUGAGCU  |
| ENSG00000129480 | GUGACUG  |
| ENSG00000129480 | UUGGCAA  |
| ENSG00000129493 | AUACAAG  |
| ENSG00000129493 | CAA AUGC |
| ENSG00000129515 | AAGGCAC  |
| ENSG00000129515 | ACAAU AU |
| ENSG00000129515 | AGCCCUU  |
| ENSG00000129515 | AUAAAGU  |
| ENSG00000129515 | AUCAUAC  |
| ENSG00000129515 | CCAGUGC  |
| ENSG00000129515 | CCAGUGU  |
| ENSG00000129515 | CUACAAA  |
| ENSG00000129515 | GAGGU AU |
| ENSG00000129515 | GAGUGUG  |
| ENSG00000129515 | GGAGUGU  |
| ENSG00000129515 | GGCAGCG  |
| ENSG00000129515 | GGUUUAC  |
| ENSG00000129515 | UCCAGUU  |
| ENSG00000129521 | AAGUGCA  |
| ENSG00000129521 | ACCACAG  |
| ENSG00000129521 | AGUGCAA  |
| ENSG00000129521 | AUAAAGU  |
| ENSG00000129521 | CUUUGGU  |
| ENSG00000129534 | AAAGUUU  |
| ENSG00000129534 | UCACAAG  |
| ENSG00000129535 | AAAGCUG  |
| ENSG00000129535 | CGCCUCC  |
| ENSG00000129535 | GUGACAG  |
| ENSG00000129566 | CAGGCUC  |
| ENSG00000129595 | GCAGGUU  |
| ENSG00000129595 | UCACAGG  |
| ENSG00000129595 | UUCAAAU  |
| ENSG00000129625 | ACUGCAU  |
| ENSG00000129636 | AUACAAG  |
| ENSG00000129654 | AACACUG  |
| ENSG00000129654 | ACCUGGA  |
| ENSG00000129654 | ACUGUGU  |
| ENSG00000129654 | GACCUGG  |
| ENSG00000129654 | GAGACCU  |
| ENSG00000129657 | GAGGUAG  |
| ENSG00000129657 | GAGGU AU |
| ENSG00000129657 | GUGCUUG  |
| ENSG00000129657 | UACAAAG  |
| ENSG00000129657 | UAUUACC  |
| ENSG00000129657 | UGUGCUU  |
| ENSG00000129667 | CACAGGG  |
| ENSG00000129675 | AAAAACC  |
| ENSG00000129675 | AAGUCUU  |
| ENSG00000129675 | AGUGUGC  |
| ENSG00000129675 | AUGGCUU  |
| ENSG00000129675 | CACAGUG  |
| ENSG00000129675 | CUGCCCC  |
| ENSG00000129675 | GAGUAUU  |
| ENSG00000129675 | UCAUUUG  |
| ENSG00000129675 | UGCAU AU |
| ENSG00000129682 | CACUGUU  |
| ENSG00000129682 | UGUCUUU  |
| ENSG00000129691 | UCACAGG  |

|                 |         |
|-----------------|---------|
| ENSG00000129696 | GUAACAG |
| ENSG00000129749 | CUGGAAA |
| ENSG00000129749 | GGAGAGA |
| ENSG00000129749 | UCUGGAA |
| ENSG00000129757 | AAAGCUG |
| ENSG00000129757 | CCAGUGU |
| ENSG00000129757 | GCUACAU |
| ENSG00000129757 | GGCAGUG |
| ENSG00000129757 | GGCUCAG |
| ENSG00000129757 | UCAAGUA |
| ENSG00000129757 | UGUCUUU |
| ENSG00000129911 | AGGCAGG |
| ENSG00000129911 | CCUGAG  |
| ENSG00000129933 | AAGGCAC |
| ENSG00000129933 | AAUGCCC |
| ENSG00000129933 | AGCACCA |
| ENSG00000129933 | AGUACUG |
| ENSG00000129946 | ACUCCAG |
| ENSG00000129946 | CACUCCU |
| ENSG00000129968 | UAUUGCU |
| ENSG00000129990 | CAAAGCA |
| ENSG00000129990 | GAUUGUA |
| ENSG00000129993 | AGCAGCA |
| ENSG00000129993 | AGCAGCG |
| ENSG00000129993 | AGCAGCU |
| ENSG00000129993 | AGGUAGU |
| ENSG00000129993 | CACAGUG |
| ENSG00000129993 | CAGUAGA |
| ENSG00000129993 | CAGUAGU |
| ENSG00000129993 | GAGGAUA |
| ENSG00000129993 | GAGGUAG |
| ENSG00000129993 | GAUUGUC |
| ENSG00000129993 | GCUAGCA |
| ENSG00000129993 | GGACCUG |
| ENSG00000129993 | UAGAGGA |
| ENSG00000129993 | UCACAGU |
| ENSG00000129993 | UUGGAGG |
| ENSG00000130032 | AAUUAUU |
| ENSG00000130032 | GACAACU |
| ENSG00000130032 | UUGGCAC |
| ENSG00000130037 | GGAAUGU |
| ENSG00000130054 | AAAGAGC |
| ENSG00000130054 | AACAUUC |
| ENSG00000130054 | AAGUCUU |
| ENSG00000130054 | AAGUGCU |
| ENSG00000130054 | AGUGCUG |
| ENSG00000130054 | CACAGUG |
| ENSG00000130054 | CCUUCAU |
| ENSG00000130054 | CUGCAGG |
| ENSG00000130054 | CUGGAAA |
| ENSG00000130054 | CUGGGCA |
| ENSG00000130054 | CUUUGGU |
| ENSG00000130054 | GACAACU |
| ENSG00000130054 | GAGCUGC |
| ENSG00000130054 | GCCUGGG |
| ENSG00000130054 | GGGGCAG |
| ENSG00000130054 | GUCUGCC |
| ENSG00000130054 | UCUGGAG |
| ENSG00000130054 | UGGAGAU |
| ENSG00000130066 | CCAGUGU |
| ENSG00000130119 | CUUGGAG |
| ENSG00000130119 | UCCAGAG |
| ENSG00000130147 | ACUGCAG |
| ENSG00000130147 | ACUGCAU |

|                 |          |
|-----------------|----------|
| ENSG00000130147 | CCCUGAG  |
| ENSG00000130147 | CUUUGGU  |
| ENSG00000130147 | GAUUGGU  |
| ENSG00000130147 | GCUACAU  |
| ENSG00000130147 | GGUUUAC  |
| ENSG00000130147 | UGCAUUA  |
| ENSG00000130147 | UGUGCUU  |
| ENSG00000130150 | AAAGAAU  |
| ENSG00000130150 | ACAUUCA  |
| ENSG00000130150 | CAAAGCA  |
| ENSG00000130150 | GGCAUUG  |
| ENSG00000130150 | GGCUGCG  |
| ENSG00000130150 | GGUGGUU  |
| ENSG00000130150 | UUGGCAA  |
| ENSG00000130150 | UUGGCAC  |
| ENSG00000130164 | AGUGGUU  |
| ENSG00000130164 | CAAAGUG  |
| ENSG00000130164 | GUAAACA  |
| ENSG00000130164 | UACAAAG  |
| ENSG00000130164 | UCACAGU  |
| ENSG00000130164 | UCCUGAG  |
| ENSG00000130164 | UGCAAAG  |
| ENSG00000130164 | UUUGCAA  |
| ENSG00000130165 | CUCUGGG  |
| ENSG00000130165 | GCUGGUG  |
| ENSG00000130165 | GGAAUGU  |
| ENSG00000130165 | GUCUCUG  |
| ENSG00000130165 | UCCAGUU  |
| ENSG00000130176 | AAAGUGC  |
| ENSG00000130176 | AAGUGCU  |
| ENSG00000130176 | AGCAGCA  |
| ENSG00000130176 | CCAGUGC  |
| ENSG00000130176 | CCAGUGU  |
| ENSG00000130176 | UGUGCUU  |
| ENSG00000130201 | AGCAGCA  |
| ENSG00000130201 | CAGCAGA  |
| ENSG00000130201 | CAGCAGG  |
| ENSG00000130202 | AAGGCAC  |
| ENSG00000130202 | AGCAGCA  |
| ENSG00000130202 | CAGCAGG  |
| ENSG00000130202 | CUCCCAA  |
| ENSG00000130202 | GCCUGGA  |
| ENSG00000130202 | GGCUCAG  |
| ENSG00000130202 | GGGGAGC  |
| ENSG00000130204 | CCCUGAG  |
| ENSG00000130204 | UAUAAAAG |
| ENSG00000130204 | UCCAUA   |
| ENSG00000130222 | GAUCAGA  |
| ENSG00000130224 | AACUACU  |
| ENSG00000130224 | AAGUGCA  |
| ENSG00000130224 | ACUCAA   |
| ENSG00000130224 | AGUGCAA  |
| ENSG00000130224 | AUGGCUU  |
| ENSG00000130224 | CUACAAA  |
| ENSG00000130224 | GACAACU  |
| ENSG00000130224 | GGCAGUG  |
| ENSG00000130224 | GUAUUCU  |
| ENSG00000130224 | GUGCAA   |
| ENSG00000130224 | GUGCCAC  |
| ENSG00000130224 | UAAGACG  |
| ENSG00000130224 | UACAAAG  |
| ENSG00000130224 | UCACAUU  |
| ENSG00000130226 | AAUGUUG  |
| ENSG00000130226 | ACAAGGU  |

|                 |         |
|-----------------|---------|
| ENSG00000130226 | ACAUUCA |
| ENSG00000130226 | CAUGGAU |
| ENSG00000130226 | CUACAGU |
| ENSG00000130226 | GGAUGAG |
| ENSG00000130226 | GUGCUUG |
| ENSG00000130227 | AGGCAGG |
| ENSG00000130227 | AUACAAG |
| ENSG00000130227 | CAGCAAA |
| ENSG00000130244 | AAAUUUC |
| ENSG00000130254 | GGAAUGU |
| ENSG00000130287 | CACAGUG |
| ENSG00000130287 | CCCUGAG |
| ENSG00000130287 | GACCUGG |
| ENSG00000130287 | GGCUCAG |
| ENSG00000130287 | GGGGUGG |
| ENSG00000130287 | GUGCUUG |
| ENSG00000130287 | UACAAAG |
| ENSG00000130294 | AAGACAU |
| ENSG00000130294 | AAUUAAU |
| ENSG00000130294 | CUGCAGC |
| ENSG00000130294 | CUGCAGG |
| ENSG00000130294 | GACCUGG |
| ENSG00000130294 | GCAGGUU |
| ENSG00000130294 | UAUAAAG |
| ENSG00000130294 | UGGCUGC |
| ENSG00000130299 | CUUUGGU |
| ENSG00000130304 | AAGGCAC |
| ENSG00000130307 | ACUCCAG |
| ENSG00000130309 | CCUGUU  |
| ENSG00000130309 | GCCUGU  |
| ENSG00000130311 | AAAAACC |
| ENSG00000130313 | UAAUAUC |
| ENSG00000130332 | AAUUUA  |
| ENSG00000130338 | ACAUUCA |
| ENSG00000130338 | AGCAAAA |
| ENSG00000130338 | AUAAUAC |
| ENSG00000130338 | CAGUAGU |
| ENSG00000130338 | CUUACAG |
| ENSG00000130338 | GACAACU |
| ENSG00000130338 | GAGGUAU |
| ENSG00000130338 | GCAGCAU |
| ENSG00000130338 | GCUGGUG |
| ENSG00000130338 | GGUGGUU |
| ENSG00000130338 | UAUAAAG |
| ENSG00000130338 | UAUUGCU |
| ENSG00000130338 | UCUAGAG |
| ENSG00000130338 | UCUGGAA |
| ENSG00000130338 | UGCAGCU |
| ENSG00000130338 | UGCAUUG |
| ENSG00000130338 | UUGGUCC |
| ENSG00000130340 | AAAAACC |
| ENSG00000130340 | AACAAAC |
| ENSG00000130340 | AAGGCAC |
| ENSG00000130340 | ACUGUAG |
| ENSG00000130340 | AGUGCUU |
| ENSG00000130340 | AUACAAG |
| ENSG00000130340 | AUAUUAU |
| ENSG00000130340 | CUUACAG |
| ENSG00000130340 | UAUAUGA |
| ENSG00000130340 | UCACACA |
| ENSG00000130340 | UGAGAAG |
| ENSG00000130382 | AAAACUG |
| ENSG00000130382 | AAAGUGC |
| ENSG00000130382 | AACAAAC |

|                 |          |
|-----------------|----------|
| ENSG00000130382 | AAGGCAC  |
| ENSG00000130382 | AAGUGCA  |
| ENSG00000130382 | AGUGCUG  |
| ENSG00000130382 | CACAAUG  |
| ENSG00000130382 | CCUGUAC  |
| ENSG00000130382 | GAGUAUU  |
| ENSG00000130382 | GGCAGUG  |
| ENSG00000130382 | UACAAAG  |
| ENSG00000130382 | UCACAAG  |
| ENSG00000130382 | UUCAAAU  |
| ENSG00000130382 | UUGGCAC  |
| ENSG00000130382 | UUGUUCG  |
| ENSG00000130382 | UUUCAAC  |
| ENSG00000130396 | AGCUGCC  |
| ENSG00000130396 | GAGGUAG  |
| ENSG00000130396 | GGCCUG   |
| ENSG00000130402 | AAAGUAC  |
| ENSG00000130402 | AAAGUAU  |
| ENSG00000130402 | AAAUCCC  |
| ENSG00000130402 | AAGGCAC  |
| ENSG00000130402 | AUAAUAC  |
| ENSG00000130402 | AUAUAAC  |
| ENSG00000130402 | CUGCCCC  |
| ENSG00000130402 | GGGUGGU  |
| ENSG00000130402 | GGUGGUU  |
| ENSG00000130402 | GGUUUAC  |
| ENSG00000130402 | UGCAUUAU |
| ENSG00000130427 | GGAGUGU  |
| ENSG00000130429 | CAAAGCA  |
| ENSG00000130429 | CCAGCAU  |
| ENSG00000130429 | UGAAGCU  |
| ENSG00000130477 | AAGUCAC  |
| ENSG00000130477 | AGCAGCA  |
| ENSG00000130477 | AGCAGCG  |
| ENSG00000130477 | AGCAGCU  |
| ENSG00000130477 | AUGCAUU  |
| ENSG00000130477 | AUGGCUU  |
| ENSG00000130477 | CUCUGGG  |
| ENSG00000130477 | CUUUGGU  |
| ENSG00000130477 | GCCUGGG  |
| ENSG00000130477 | GGCAGCG  |
| ENSG00000130477 | GGCGGGG  |
| ENSG00000130477 | GUGCAA   |
| ENSG00000130477 | GUGCUUG  |
| ENSG00000130477 | GUUAAUG  |
| ENSG00000130477 | UGUGCUU  |
| ENSG00000130477 | UUGUUCG  |
| ENSG00000130477 | UUUGCAA  |
| ENSG00000130508 | AAAGUAA  |
| ENSG00000130508 | GAGGUAG  |
| ENSG00000130508 | UCACAUU  |
| ENSG00000130508 | UGAGAAG  |
| ENSG00000130508 | UGCAUAG  |
| ENSG00000130508 | UGCAUAU  |
| ENSG00000130517 | GGGGCAG  |
| ENSG00000130522 | AAAAACC  |
| ENSG00000130522 | GAAACAU  |
| ENSG00000130522 | GAGGCUG  |
| ENSG00000130522 | GGAAUGU  |
| ENSG00000130522 | GGCUGCG  |
| ENSG00000130522 | GGGUCC   |
| ENSG00000130522 | UUGUUCG  |
| ENSG00000130528 | GAGAAAU  |
| ENSG00000130529 | CCAGUGU  |

|                 |         |
|-----------------|---------|
| ENSG00000130540 | AAAAAUC |
| ENSG00000130540 | AAAUUUC |
| ENSG00000130540 | ACAGUAU |
| ENSG00000130540 | CCAGCAU |
| ENSG00000130540 | UGUCUUU |
| ENSG00000130540 | UUGGUUC |
| ENSG00000130544 | UCCCACA |
| ENSG00000130544 | UCCCACC |
| ENSG00000130545 | UCACACA |
| ENSG00000130558 | AACACUG |
| ENSG00000130558 | AACAGUC |
| ENSG00000130558 | AGAUAAA |
| ENSG00000130558 | GUCAUUG |
| ENSG00000130559 | ACAUUCA |
| ENSG00000130559 | AGCAGCA |
| ENSG00000130559 | CAGUAGA |
| ENSG00000130559 | GGCAGUG |
| ENSG00000130559 | UCAAGUA |
| ENSG00000130584 | AAAAACC |
| ENSG00000130584 | AAGUGCA |
| ENSG00000130584 | ACUGCAG |
| ENSG00000130584 | AGCAAAA |
| ENSG00000130584 | AGCACCA |
| ENSG00000130584 | AGCAGCA |
| ENSG00000130584 | AGCAGCG |
| ENSG00000130584 | AGCAGCU |
| ENSG00000130584 | CCAGUGU |
| ENSG00000130584 | CUGCAGC |
| ENSG00000130584 | GGUUACC |
| ENSG00000130584 | UCCUGAG |
| ENSG00000130590 | AGUGCUG |
| ENSG00000130590 | CACAGUG |
| ENSG00000130590 | CUGGCUC |
| ENSG00000130590 | GGGGUCC |
| ENSG00000130590 | UCACAGU |
| ENSG00000130590 | UGCCAGC |
| ENSG00000130592 | CCCCUGG |
| ENSG00000130635 | AAAGAAU |
| ENSG00000130635 | AACAAAC |
| ENSG00000130635 | AACAUUC |
| ENSG00000130635 | ACAAUAU |
| ENSG00000130635 | ACAUUCA |
| ENSG00000130635 | AUGGCUU |
| ENSG00000130635 | CACAGUG |
| ENSG00000130635 | CACUGUU |
| ENSG00000130635 | CUGGGGG |
| ENSG00000130635 | CUUUGGU |
| ENSG00000130635 | GAGAUGA |
| ENSG00000130635 | GGCAAGA |
| ENSG00000130635 | GGGGUCC |
| ENSG00000130635 | GUCCAGA |
| ENSG00000130635 | UCAAGUA |
| ENSG00000130635 | UCACAGG |
| ENSG00000130635 | UCACAGU |
| ENSG00000130635 | UGACCUA |
| ENSG00000130635 | UUGGCAA |
| ENSG00000130635 | UUGGCAC |
| ENSG00000130638 | AACUGGU |
| ENSG00000130638 | AAUCACU |
| ENSG00000130638 | CUGGAAA |
| ENSG00000130638 | GAGAAAU |
| ENSG00000130638 | UGAGUCU |
| ENSG00000130669 | AAAACUG |
| ENSG00000130669 | AAAGAGG |

|                 |          |
|-----------------|----------|
| ENSG00000130669 | ACAAUUAU |
| ENSG00000130669 | ACAUUCA  |
| ENSG00000130669 | CAGUAGA  |
| ENSG00000130669 | CUUUGGU  |
| ENSG00000130669 | GGCUCAG  |
| ENSG00000130669 | UCAUGAU  |
| ENSG00000130669 | UCUAGAG  |
| ENSG00000130675 | AACACUG  |
| ENSG00000130675 | ACAGUAC  |
| ENSG00000130675 | ACAUUCA  |
| ENSG00000130675 | AUACAAG  |
| ENSG00000130675 | CCAGCAU  |
| ENSG00000130675 | UCAAGUA  |
| ENSG00000130675 | UCCAGAG  |
| ENSG00000130695 | AACAAAC  |
| ENSG00000130695 | ACCCGUA  |
| ENSG00000130695 | CCCUGAG  |
| ENSG00000130695 | UAUAAAG  |
| ENSG00000130695 | UGAGAAU  |
| ENSG00000130699 | AAAAACC  |
| ENSG00000130699 | AAAGUAC  |
| ENSG00000130699 | AAUACUG  |
| ENSG00000130699 | AAUUUUA  |
| ENSG00000130699 | AGUGCAA  |
| ENSG00000130699 | AUAU AAC |
| ENSG00000130699 | AUGUGCC  |
| ENSG00000130699 | CACAGUG  |
| ENSG00000130699 | CAGUGCA  |
| ENSG00000130699 | GGAUUUC  |
| ENSG00000130699 | UCAUUUG  |
| ENSG00000130699 | UCCUAUA  |
| ENSG00000130699 | UUGGCAA  |
| ENSG00000130699 | UUGGCAC  |
| ENSG00000130703 | ACAUUAC  |
| ENSG00000130703 | AUCCUUG  |
| ENSG00000130703 | UAAUGCU  |
| ENSG00000130703 | UCCACA   |
| ENSG00000130703 | UUGAUCA  |
| ENSG00000130703 | UUGGCAC  |
| ENSG00000130707 | UACAAAG  |
| ENSG00000130711 | AAAGUGC  |
| ENSG00000130711 | AACUCUA  |
| ENSG00000130711 | AAUUUUA  |
| ENSG00000130711 | GAAAACA  |
| ENSG00000130711 | GACCAUG  |
| ENSG00000130711 | UAAUAUC  |
| ENSG00000130711 | UACAAAG  |
| ENSG00000130713 | CAUGGGU  |
| ENSG00000130720 | CUGCCCC  |
| ENSG00000130725 | AACAUUC  |
| ENSG00000130725 | AGUAACA  |
| ENSG00000130725 | AUUCAUU  |
| ENSG00000130725 | GAGGCAG  |
| ENSG00000130726 | AAAUCCC  |
| ENSG00000130733 | AAAAGUA  |
| ENSG00000130733 | AUAU AAC |
| ENSG00000130733 | CUGCCCC  |
| ENSG00000130733 | UGCAU AU |
| ENSG00000130734 | ACAGUAC  |
| ENSG00000130734 | CCAGUGU  |
| ENSG00000130734 | CCCUGAG  |
| ENSG00000130734 | GGCCUG   |
| ENSG00000130741 | AACACUG  |
| ENSG00000130749 | AAAAAUC  |

|                 |         |
|-----------------|---------|
| ENSG00000130749 | AAUACUG |
| ENSG00000130749 | ACCACAG |
| ENSG00000130749 | ACUGCAU |
| ENSG00000130749 | AUACAAG |
| ENSG00000130749 | AUCCUUU |
| ENSG00000130749 | CAGGUGA |
| ENSG00000130749 | CGGAUCC |
| ENSG00000130749 | CUGGAAA |
| ENSG00000130749 | GAUUGUA |
| ENSG00000130749 | GAUUGUC |
| ENSG00000130749 | GCACCAU |
| ENSG00000130749 | GCAUCCC |
| ENSG00000130749 | GCCUGAU |
| ENSG00000130749 | GGCAGUG |
| ENSG00000130749 | UCUGGAG |
| ENSG00000130749 | UUAGAGA |
| ENSG00000130749 | UUUGCAC |
| ENSG00000130758 | ACAUUCA |
| ENSG00000130758 | GCCCUGU |
| ENSG00000130758 | UAAUGCU |
| ENSG00000130758 | UGGCUGC |
| ENSG00000130766 | AAAGUGC |
| ENSG00000130766 | AACACUG |
| ENSG00000130766 | AGCAAAA |
| ENSG00000130766 | GGAGUGU |
| ENSG00000130766 | UCACACA |
| ENSG00000130766 | UCACAGG |
| ENSG00000130766 | UCACAUU |
| ENSG00000130766 | UGGGUGA |
| ENSG00000130766 | UUGGCAA |
| ENSG00000130779 | CCAGUGC |
| ENSG00000130803 | UUCUGCA |
| ENSG00000130816 | AUAAAGU |
| ENSG00000130816 | GGAGAGA |
| ENSG00000130821 | AAAGCUG |
| ENSG00000130821 | AUGGCUU |
| ENSG00000130821 | GCUGGUG |
| ENSG00000130821 | GGUGGGC |
| ENSG00000130821 | UAUAAAG |
| ENSG00000130822 | CAGCAGA |
| ENSG00000130822 | CAGUCCA |
| ENSG00000130827 | CAAAGCA |
| ENSG00000130827 | GCAGAAG |
| ENSG00000130827 | UAUUGCU |
| ENSG00000130829 | AAAGUAA |
| ENSG00000130829 | AACAGUC |
| ENSG00000130829 | AAGACAU |
| ENSG00000130829 | AGAUGUG |
| ENSG00000130829 | AGGCAGG |
| ENSG00000130829 | AGUAACA |
| ENSG00000130829 | AGUGAUC |
| ENSG00000130829 | GAGGCAG |
| ENSG00000130829 | GAGGUAG |
| ENSG00000130829 | GAGGUAU |
| ENSG00000130829 | GGCAGGG |
| ENSG00000130829 | GUAACAG |
| ENSG00000130829 | GUGUGGC |
| ENSG00000130830 | UUGGCAA |
| ENSG00000130830 | UUGGCAC |
| ENSG00000130856 | AACAAAC |
| ENSG00000130856 | AAUACUG |
| ENSG00000130856 | ACAUUCA |
| ENSG00000130856 | AUGGCUU |
| ENSG00000130856 | CUGACUC |



|                 |         |
|-----------------|---------|
| ENSG00000130856 | CUUUGGU |
| ENSG00000130856 | UCCUGAG |
| ENSG00000130856 | UGUGCUU |
| ENSG00000130881 | ACUGUGU |
| ENSG00000130881 | GCGGGGC |
| ENSG00000130881 | GUAUUCU |
| ENSG00000130881 | UACAAAG |
| ENSG00000130881 | UCCCUGU |
| ENSG00000130939 | AGCAAAA |
| ENSG00000130939 | CAGCAAA |
| ENSG00000130939 | CUUUGGU |
| ENSG00000130939 | UAAUACA |
| ENSG00000130940 | AACAAAC |
| ENSG00000130940 | AAUACUG |
| ENSG00000130940 | ACACACC |
| ENSG00000130940 | ACACACU |
| ENSG00000130940 | ACAUAGA |
| ENSG00000130940 | ACUGUAG |
| ENSG00000130940 | AGCAGCA |
| ENSG00000130940 | AUGAGCU |
| ENSG00000130940 | AUGGCUU |
| ENSG00000130940 | AUGUGCC |
| ENSG00000130940 | CAAAACU |
| ENSG00000130940 | CAGUGCA |
| ENSG00000130940 | CCCCUGG |
| ENSG00000130940 | CGAGGAG |
| ENSG00000130940 | CUCAAAC |
| ENSG00000130940 | GAGCUAA |
| ENSG00000130940 | GGCUCUG |
| ENSG00000130940 | GUGCAAA |
| ENSG00000130940 | UACAAAG |
| ENSG00000130940 | UAUAAAG |
| ENSG00000130940 | UUGUUCG |
| ENSG00000130940 | UUUUUGC |
| ENSG00000130956 | AGGUAGU |
| ENSG00000130956 | GAGGUAG |
| ENSG00000130958 | GAGGUAU |
| ENSG00000130962 | AAAGCUG |
| ENSG00000130962 | AAAGGUA |
| ENSG00000130962 | AGUGGUU |
| ENSG00000130962 | CAGUGCA |
| ENSG00000130962 | GGGUUUA |
| ENSG00000130962 | GUAGUGU |
| ENSG00000130962 | UAUAAAG |
| ENSG00000130962 | UCACAGU |
| ENSG00000130962 | UGCAGCU |
| ENSG00000130985 | ACAAGGU |
| ENSG00000130988 | CAAGAGC |
| ENSG00000130997 | ACUCCAG |
| ENSG00000130997 | GCCUGGG |
| ENSG00000131002 | ACCACAG |
| ENSG00000131002 | AGUAGUU |
| ENSG00000131002 | GGUAGAC |
| ENSG00000131002 | GUGCAAA |
| ENSG00000131013 | AGCAAAA |
| ENSG00000131016 | ACAAUUA |
| ENSG00000131016 | AUACAAG |
| ENSG00000131016 | GAUUGUC |
| ENSG00000131018 | AAACUGU |
| ENSG00000131018 | AGCAAAA |
| ENSG00000131043 | ACCAGCA |
| ENSG00000131043 | CAGCAGG |
| ENSG00000131043 | UCUCCAA |
| ENSG00000131051 | AAAGAGC |

|                 |         |
|-----------------|---------|
| ENSG00000131051 | ACACACU |
| ENSG00000131051 | AGUGGUU |
| ENSG00000131051 | GUCUUGC |
| ENSG00000131051 | UAUAUGA |
| ENSG00000131061 | UCACACA |
| ENSG00000131067 | CCCUGAG |
| ENSG00000131067 | GAGCUGC |
| ENSG00000131067 | GCAUCCC |
| ENSG00000131067 | GGGGAGC |
| ENSG00000131067 | GGGGUCC |
| ENSG00000131067 | UGCAAAG |
| ENSG00000131069 | GACCUGG |
| ENSG00000131069 | UGGCCCU |
| ENSG00000131089 | AAAGAAU |
| ENSG00000131089 | AAUCACU |
| ENSG00000131089 | ACUGCAG |
| ENSG00000131089 | AGCAGCA |
| ENSG00000131089 | AGUGCUU |
| ENSG00000131089 | AUCACUA |
| ENSG00000131089 | CAAAGCA |
| ENSG00000131089 | CAAUUGC |
| ENSG00000131089 | CACUGUU |
| ENSG00000131089 | CCAGCAU |
| ENSG00000131089 | GAAUUGU |
| ENSG00000131089 | GAGUUGA |
| ENSG00000131089 | GAUUGUC |
| ENSG00000131089 | GUCCAGA |
| ENSG00000131089 | GUGUCAC |
| ENSG00000131089 | UCCAGUU |
| ENSG00000131089 | UUUCAAC |
| ENSG00000131089 | UUUUUGC |
| ENSG00000131094 | CUUUGGU |
| ENSG00000131094 | UUGGUCC |
| ENSG00000131095 | CUCCAGC |
| ENSG00000131095 | UCCCUCU |
| ENSG00000131116 | UCACACA |
| ENSG00000131148 | AAAAAUC |
| ENSG00000131148 | AAAGUAU |
| ENSG00000131148 | AAGGCAC |
| ENSG00000131148 | CACAGGG |
| ENSG00000131148 | GUAUUCU |
| ENSG00000131148 | UAAUAGU |
| ENSG00000131148 | UAUAAAG |
| ENSG00000131149 | AAAAAUC |
| ENSG00000131149 | AAACUGU |
| ENSG00000131149 | AAAGUAC |
| ENSG00000131149 | AAAGUAU |
| ENSG00000131149 | AACUGGU |
| ENSG00000131149 | AAUACUG |
| ENSG00000131149 | AAUCCUU |
| ENSG00000131149 | ACAAGGU |
| ENSG00000131149 | ACAAUAU |
| ENSG00000131149 | ACAGUAC |
| ENSG00000131149 | ACCAGCA |
| ENSG00000131149 | ACUGGCC |
| ENSG00000131149 | ACUGGCU |
| ENSG00000131149 | AGAUAAA |
| ENSG00000131149 | AGCAGCA |
| ENSG00000131149 | AGCCCUU |
| ENSG00000131149 | AGUGCAA |
| ENSG00000131149 | AUAAUAC |
| ENSG00000131149 | AUCCUUU |
| ENSG00000131149 | AUGGCAC |
| ENSG00000131149 | AUGGCUU |

|                 |         |
|-----------------|---------|
| ENSG00000131149 | CAAAGCA |
| ENSG00000131149 | CCUUCAU |
| ENSG00000131149 | CGGCCUG |
| ENSG00000131149 | CUAUACA |
| ENSG00000131149 | CUCAAAC |
| ENSG00000131149 | CUGCCCC |
| ENSG00000131149 | GAUUGUA |
| ENSG00000131149 | GAUUGUC |
| ENSG00000131149 | GCCUGGA |
| ENSG00000131149 | GGAAGAC |
| ENSG00000131149 | GGCAGGG |
| ENSG00000131149 | UAAUAUC |
| ENSG00000131149 | UACAAAG |
| ENSG00000131149 | UCACAGG |
| ENSG00000131149 | UCCUGAG |
| ENSG00000131149 | UCUGGAA |
| ENSG00000131149 | UGCCAGC |
| ENSG00000131149 | UUAGGAU |
| ENSG00000131153 | AGAUGUG |
| ENSG00000131171 | UAUAAAG |
| ENSG00000131171 | UGAAAGG |
| ENSG00000131171 | UGAAGCU |
| ENSG00000131188 | ACACACC |
| ENSG00000131188 | CACACCU |
| ENSG00000131188 | GUAACAG |
| ENSG00000131188 | UCACACA |
| ENSG00000131196 | AGCAAAA |
| ENSG00000131196 | CAGCAAA |
| ENSG00000131196 | CUACAAA |
| ENSG00000131196 | GAAAACA |
| ENSG00000131196 | UACAAAG |
| ENSG00000131196 | UAUUGCU |
| ENSG00000131196 | UGUGCUU |
| ENSG00000131196 | UUGGUUC |
| ENSG00000131236 | AGGCAGG |
| ENSG00000131236 | CACAGGG |
| ENSG00000131236 | CCAGUGC |
| ENSG00000131236 | CUUUGGU |
| ENSG00000131236 | GAGGUAG |
| ENSG00000131236 | GGAAUGU |
| ENSG00000131236 | UAGAGGA |
| ENSG00000131236 | UCACAGG |
| ENSG00000131236 | UGCAUAG |
| ENSG00000131236 | UUGGUCC |
| ENSG00000131238 | AACUACU |
| ENSG00000131238 | UCAACAG |
| ENSG00000131242 | AAAAAUC |
| ENSG00000131242 | AAAGUGC |
| ENSG00000131242 | AAGGCAC |
| ENSG00000131242 | AAGUGCA |
| ENSG00000131242 | AAUCCUU |
| ENSG00000131242 | ACAGUAU |
| ENSG00000131242 | ACCAGCA |
| ENSG00000131242 | AUGGCAC |
| ENSG00000131242 | CAAAGUG |
| ENSG00000131242 | CAGCAAA |
| ENSG00000131242 | CCUGUAC |
| ENSG00000131242 | CUCUUCC |
| ENSG00000131242 | CUGCAGC |
| ENSG00000131242 | CUGCAGG |
| ENSG00000131242 | CUUCUCU |
| ENSG00000131242 | CUUUGGU |
| ENSG00000131242 | GAGGUAG |
| ENSG00000131242 | GAGUGUG |

|                 |         |
|-----------------|---------|
| ENSG00000131242 | GCAGCAU |
| ENSG00000131242 | GGAAGAC |
| ENSG00000131242 | GGCAGUG |
| ENSG00000131242 | UACAAAG |
| ENSG00000131242 | UACAGUU |
| ENSG00000131242 | UCCAGAG |
| ENSG00000131242 | UCUCAAG |
| ENSG00000131242 | UGAAAGG |
| ENSG00000131242 | UGCAAAG |
| ENSG00000131242 | UUGGUUC |
| ENSG00000131323 | ACAAUAU |
| ENSG00000131368 | AAAAGUA |
| ENSG00000131368 | AAACUGU |
| ENSG00000131368 | AAAGCUG |
| ENSG00000131368 | AAGUGCU |
| ENSG00000131368 | AAUACUG |
| ENSG00000131368 | ACAAUAU |
| ENSG00000131368 | AGUGCUG |
| ENSG00000131368 | AUUGCAC |
| ENSG00000131368 | CAGUCUG |
| ENSG00000131368 | CAGUGCA |
| ENSG00000131368 | CUUGGGC |
| ENSG00000131368 | GAGUAUU |
| ENSG00000131368 | GCUGGAU |
| ENSG00000131368 | GGCAUUG |
| ENSG00000131368 | UAAUACA |
| ENSG00000131368 | UGGGACA |
| ENSG00000131368 | UGUAUAA |
| ENSG00000131368 | UUCUUGU |
| ENSG00000131370 | AAAGUGC |
| ENSG00000131370 | AAGACAU |
| ENSG00000131370 | UAUUACC |
| ENSG00000131370 | UGUAUAA |
| ENSG00000131370 | UUGGCAA |
| ENSG00000131374 | AUGGCUU |
| ENSG00000131374 | CAGUGCA |
| ENSG00000131374 | GGAAUGU |
| ENSG00000131375 | AGCACCA |
| ENSG00000131375 | AUGUAAU |
| ENSG00000131375 | AUUCAUU |
| ENSG00000131375 | CUGGGCA |
| ENSG00000131375 | UCACAGU |
| ENSG00000131378 | CAAAGCA |
| ENSG00000131378 | UAUUGCU |
| ENSG00000131378 | UGCCUG  |
| ENSG00000131378 | UUCUGCA |
| ENSG00000131378 | UUGGCAC |
| ENSG00000131381 | AAAGAGG |
| ENSG00000131381 | AAAGUGC |
| ENSG00000131381 | ACAAGGU |
| ENSG00000131381 | ACUGCAG |
| ENSG00000131381 | ACUGUAG |
| ENSG00000131381 | AGCACCA |
| ENSG00000131381 | AGUGCAA |
| ENSG00000131381 | AUAAAGU |
| ENSG00000131381 | AUACCUC |
| ENSG00000131381 | CUGACUC |
| ENSG00000131381 | GGUUUAC |
| ENSG00000131381 | GUAGUGU |
| ENSG00000131381 | GUGCCUG |
| ENSG00000131381 | UCCCUUG |
| ENSG00000131381 | UCCCUUU |
| ENSG00000131386 | GAGCUGC |
| ENSG00000131386 | GAGGUAG |

|                 |          |
|-----------------|----------|
| ENSG00000131389 | AAAAACC  |
| ENSG00000131389 | AAAGCUG  |
| ENSG00000131389 | AACCUGG  |
| ENSG00000131389 | AAGGUGC  |
| ENSG00000131389 | AAUACUG  |
| ENSG00000131389 | AAUCUCU  |
| ENSG00000131389 | AAUGUUG  |
| ENSG00000131389 | AAUUGCU  |
| ENSG00000131389 | ACAGGUG  |
| ENSG00000131389 | ACAUAGA  |
| ENSG00000131389 | ACUGCAG  |
| ENSG00000131389 | ACUGCAU  |
| ENSG00000131389 | AGCAAAA  |
| ENSG00000131389 | AGUGGUU  |
| ENSG00000131389 | AUAAAGU  |
| ENSG00000131389 | AUCAUAC  |
| ENSG00000131389 | AUGGCAC  |
| ENSG00000131389 | CACAGUG  |
| ENSG00000131389 | CAGCAGG  |
| ENSG00000131389 | CUGGAAA  |
| ENSG00000131389 | CUUGUAU  |
| ENSG00000131389 | CUUUGGU  |
| ENSG00000131389 | GCCUGGG  |
| ENSG00000131389 | GGAGGCA  |
| ENSG00000131389 | GGUCUAG  |
| ENSG00000131389 | GUAAACA  |
| ENSG00000131389 | GUGACAG  |
| ENSG00000131389 | UAUUGCU  |
| ENSG00000131389 | UCAAGUA  |
| ENSG00000131389 | UCACAGU  |
| ENSG00000131389 | UCUGGAA  |
| ENSG00000131389 | UGAGAAU  |
| ENSG00000131389 | UGUAUAA  |
| ENSG00000131389 | UGUCUUU  |
| ENSG00000131389 | UGUGCUU  |
| ENSG00000131389 | UUCAAAU  |
| ENSG00000131389 | UUGGCAA  |
| ENSG00000131389 | UUGGCAC  |
| ENSG00000131389 | UUGGUCC  |
| ENSG00000131398 | AACCUGG  |
| ENSG00000131408 | AAGGUGC  |
| ENSG00000131408 | GGAAGAC  |
| ENSG00000131437 | AAAGAAU  |
| ENSG00000131437 | AAGGCAC  |
| ENSG00000131437 | CUACAGU  |
| ENSG00000131437 | GUAAACA  |
| ENSG00000131437 | UCACAGG  |
| ENSG00000131437 | UCAUUUG  |
| ENSG00000131437 | UGAGAAU  |
| ENSG00000131446 | AGUGGUU  |
| ENSG00000131446 | CACAGUG  |
| ENSG00000131446 | CUUUGGU  |
| ENSG00000131446 | UUGGUUC  |
| ENSG00000131459 | AAAACUG  |
| ENSG00000131459 | AAGGCAC  |
| ENSG00000131459 | AGCAAAA  |
| ENSG00000131459 | CACAGUG  |
| ENSG00000131459 | CAGUAGU  |
| ENSG00000131459 | CAGUUAC  |
| ENSG00000131459 | CUAUACA  |
| ENSG00000131459 | UAUAAAAG |
| ENSG00000131459 | UCACAGG  |
| ENSG00000131459 | UGCAUUA  |
| ENSG00000131459 | UGGGUAC  |

|                 |         |
|-----------------|---------|
| ENSG00000131462 | AGUGCUU |
| ENSG00000131467 | AAAAACC |
| ENSG00000131467 | AAAGUAC |
| ENSG00000131467 | AAUUUUA |
| ENSG00000131467 | AGCAGCA |
| ENSG00000131467 | AGCCAGU |
| ENSG00000131467 | CCCCUGG |
| ENSG00000131467 | CUCCAGC |
| ENSG00000131467 | GAGAAAU |
| ENSG00000131467 | GCAUCCC |
| ENSG00000131467 | GGCCUG  |
| ENSG00000131467 | GUAAACA |
| ENSG00000131467 | GUAACAG |
| ENSG00000131467 | UAGACUG |
| ENSG00000131467 | UCCUGAG |
| ENSG00000131467 | UCUUGAG |
| ENSG00000131467 | UGACAUC |
| ENSG00000131467 | UGGCCCU |
| ENSG00000131470 | UCCAGAG |
| ENSG00000131471 | GAGCUGC |
| ENSG00000131473 | UCACAGG |
| ENSG00000131473 | UCACAGU |
| ENSG00000131475 | AGCACCA |
| ENSG00000131475 | AGCAGCU |
| ENSG00000131475 | CACCAGC |
| ENSG00000131475 | CUGCAGC |
| ENSG00000131475 | GACCCUG |
| ENSG00000131475 | GGUUUAC |
| ENSG00000131475 | UGAGUCU |
| ENSG00000131482 | AAAAGUA |
| ENSG00000131482 | AAAGUAA |
| ENSG00000131482 | AAUACUG |
| ENSG00000131482 | ACUGCAU |
| ENSG00000131482 | AGCACCA |
| ENSG00000131482 | AGUAACA |
| ENSG00000131482 | GGAGUGU |
| ENSG00000131503 | AAAAAUC |
| ENSG00000131503 | AAAUCCC |
| ENSG00000131503 | GCUACAU |
| ENSG00000131504 | AACAGUC |
| ENSG00000131504 | AAGGCAC |
| ENSG00000131504 | AGCAGCA |
| ENSG00000131504 | AUGCACC |
| ENSG00000131504 | CAGCAA  |
| ENSG00000131504 | CAGCAGG |
| ENSG00000131504 | CCAGGAG |
| ENSG00000131504 | CUGCAGG |
| ENSG00000131504 | CUUUGGU |
| ENSG00000131504 | GGCUCAG |
| ENSG00000131504 | UCCUUGC |
| ENSG00000131504 | UGAAGCU |
| ENSG00000131504 | UGCAAAG |
| ENSG00000131504 | UUUGCAA |
| ENSG00000131507 | AAGGCAC |
| ENSG00000131507 | AAUGUUG |
| ENSG00000131507 | AAUUUUA |
| ENSG00000131507 | AUAUAAC |
| ENSG00000131507 | CAAGAGC |
| ENSG00000131507 | CCAGCAU |
| ENSG00000131507 | CUGCAGG |
| ENSG00000131507 | CUGCCC  |
| ENSG00000131507 | CUUACAG |
| ENSG00000131507 | GAAAACA |
| ENSG00000131507 | GCAGGAC |

|                 |          |
|-----------------|----------|
| ENSG00000131507 | GCAGGUU  |
| ENSG00000131507 | GCUACAU  |
| ENSG00000131507 | GUUAGGA  |
| ENSG00000131507 | UGAGAAG  |
| ENSG00000131507 | UGAGAAU  |
| ENSG00000131507 | UGCCAGC  |
| ENSG00000131508 | ACUGUAG  |
| ENSG00000131508 | AGGUUUAU |
| ENSG00000131508 | AUGCAUU  |
| ENSG00000131508 | AUGUAAU  |
| ENSG00000131508 | GUAAACA  |
| ENSG00000131508 | UCAUAGA  |
| ENSG00000131508 | UGACUGU  |
| ENSG00000131558 | AAGUUGU  |
| ENSG00000131558 | CUCAAAC  |
| ENSG00000131558 | UCUCAAG  |
| ENSG00000131558 | UGAGAAG  |
| ENSG00000131626 | AAAAACC  |
| ENSG00000131626 | AAAAAUC  |
| ENSG00000131626 | AAAGUAC  |
| ENSG00000131626 | ACAAUAU  |
| ENSG00000131626 | ACAGUAU  |
| ENSG00000131626 | ACUGUGU  |
| ENSG00000131626 | AGUGUGC  |
| ENSG00000131626 | AUACAAG  |
| ENSG00000131626 | GGCAGUG  |
| ENSG00000131626 | GGGUAAG  |
| ENSG00000131626 | GUAGUGU  |
| ENSG00000131653 | AAAAACC  |
| ENSG00000131653 | AAAGAAU  |
| ENSG00000131653 | AAAGCUG  |
| ENSG00000131653 | AAAGGUA  |
| ENSG00000131653 | AACAAAC  |
| ENSG00000131653 | ACCUGGA  |
| ENSG00000131653 | AUGAGCU  |
| ENSG00000131653 | CAGUCUG  |
| ENSG00000131653 | CGUACCG  |
| ENSG00000131653 | CUGCUCA  |
| ENSG00000131653 | GAGCUGC  |
| ENSG00000131653 | GAGUAUU  |
| ENSG00000131653 | GUGCCUG  |
| ENSG00000131668 | AAGUCAC  |
| ENSG00000131668 | GUGCCUG  |
| ENSG00000131668 | GUGUCAC  |
| ENSG00000131669 | CUGGGCA  |
| ENSG00000131669 | GGCCUG   |
| ENSG00000131686 | AAAUUUC  |
| ENSG00000131711 | AAGGCAC  |
| ENSG00000131711 | ACAUCAC  |
| ENSG00000131711 | AGUGCAA  |
| ENSG00000131711 | AUAAUAC  |
| ENSG00000131711 | AUCAUAC  |
| ENSG00000131711 | CAGUGCA  |
| ENSG00000131711 | CUGCAGG  |
| ENSG00000131711 | CUUUGGU  |
| ENSG00000131711 | GCUGUCU  |
| ENSG00000131711 | GGGUGUU  |
| ENSG00000131711 | GUGCAA   |
| ENSG00000131711 | UACAGUU  |
| ENSG00000131711 | UCAAGUA  |
| ENSG00000131711 | UCACAGG  |
| ENSG00000131724 | AUGAGCU  |
| ENSG00000131724 | GGCUCUG  |
| ENSG00000131725 | CCAGUGC  |

|                 |          |
|-----------------|----------|
| ENSG00000131725 | UGAGAAG  |
| ENSG00000131725 | UGAGAAU  |
| ENSG00000131725 | UGGUACC  |
| ENSG00000131725 | UGUGCUU  |
| ENSG00000131737 | GAGAAAU  |
| ENSG00000131737 | UCCUUGC  |
| ENSG00000131738 | AAAGUUU  |
| ENSG00000131738 | UUUGCAA  |
| ENSG00000131746 | UCUUGAG  |
| ENSG00000131746 | UGGCCAC  |
| ENSG00000131747 | ACAGUAU  |
| ENSG00000131748 | GACCCUG  |
| ENSG00000131748 | GAGGCAG  |
| ENSG00000131748 | GGCUCUG  |
| ENSG00000131748 | GUAAACA  |
| ENSG00000131748 | UACAAAG  |
| ENSG00000131759 | AAAAACC  |
| ENSG00000131759 | AGGCAGG  |
| ENSG00000131759 | AUGGCUU  |
| ENSG00000131759 | CACAGUG  |
| ENSG00000131759 | CAGUAGA  |
| ENSG00000131759 | CCAGUAC  |
| ENSG00000131759 | CCCGUCC  |
| ENSG00000131759 | CCUUCAU  |
| ENSG00000131759 | GUAACAG  |
| ENSG00000131759 | GUGCUUG  |
| ENSG00000131759 | UCACAGG  |
| ENSG00000131771 | GCCUGU   |
| ENSG00000131771 | GGCAGGG  |
| ENSG00000131771 | UGCCUG   |
| ENSG00000131773 | AAAGUUU  |
| ENSG00000131773 | ACAGUAU  |
| ENSG00000131773 | CAGACAG  |
| ENSG00000131773 | GUUCAUG  |
| ENSG00000131773 | UACAAAG  |
| ENSG00000131773 | UCACAAG  |
| ENSG00000131773 | UGGAGAU  |
| ENSG00000131779 | AAAAGUA  |
| ENSG00000131788 | AACAUUC  |
| ENSG00000131788 | AAGGUGC  |
| ENSG00000131788 | ACAUUCA  |
| ENSG00000131788 | AUAU AAC |
| ENSG00000131788 | CUUUGGU  |
| ENSG00000131788 | GGAAUGU  |
| ENSG00000131788 | UCACAAG  |
| ENSG00000131791 | AAAUCCC  |
| ENSG00000131791 | AGCAGCU  |
| ENSG00000131791 | AGUGCUG  |
| ENSG00000131791 | AUUGCAC  |
| ENSG00000131791 | CUGCAGC  |
| ENSG00000131791 | GAGAACC  |
| ENSG00000131791 | GAGGUAG  |
| ENSG00000131791 | GCAGAAG  |
| ENSG00000131791 | GCAGCAU  |
| ENSG00000131791 | GGCUCUG  |
| ENSG00000131791 | GUCCAGA  |
| ENSG00000131791 | UGCAUAG  |
| ENSG00000131791 | UGCAUAU  |
| ENSG00000131795 | ACUCAA   |
| ENSG00000131795 | ACUGGCC  |
| ENSG00000131795 | CCUUCUG  |
| ENSG00000131795 | GCUGGAU  |
| ENSG00000131795 | GGCAAGA  |
| ENSG00000131795 | GUGUCAC  |



|                 |          |
|-----------------|----------|
| ENSG00000131795 | UAUUACC  |
| ENSG00000131795 | UGCUGAC  |
| ENSG00000131795 | UGGCUGC  |
| ENSG00000131795 | UGUGUCA  |
| ENSG00000131828 | ACUGCAU  |
| ENSG00000131845 | UGGCCAC  |
| ENSG00000131873 | AAAGUAC  |
| ENSG00000131873 | ACUGCAG  |
| ENSG00000131873 | ACUGCAU  |
| ENSG00000131873 | AGCACCA  |
| ENSG00000131873 | AUGGCUU  |
| ENSG00000131873 | CCAGCAU  |
| ENSG00000131873 | CUUUGGU  |
| ENSG00000131873 | UCAAGUA  |
| ENSG00000131873 | UGGAGAU  |
| ENSG00000131873 | UUCAAGC  |
| ENSG00000131873 | UUGGAGG  |
| ENSG00000131873 | UUGUUCG  |
| ENSG00000131876 | UACAAAG  |
| ENSG00000131876 | UUCAAAU  |
| ENSG00000131899 | AACAAAC  |
| ENSG00000131899 | ACACACC  |
| ENSG00000131899 | CUACAGU  |
| ENSG00000131899 | UAAUAUC  |
| ENSG00000131899 | UGCAAAG  |
| ENSG00000131899 | UUUCAAC  |
| ENSG00000131910 | UACAAAG  |
| ENSG00000131910 | UAUUACC  |
| ENSG00000131941 | AACACUG  |
| ENSG00000131941 | ACAGUAU  |
| ENSG00000131941 | AUAUUAU  |
| ENSG00000131941 | GAGUAUU  |
| ENSG00000131941 | UUGGCAA  |
| ENSG00000131966 | AGGUAGU  |
| ENSG00000131966 | GAGGUAG  |
| ENSG00000131966 | UGAAAUG  |
| ENSG00000131969 | AAGUCUU  |
| ENSG00000131979 | CUGCCCC  |
| ENSG00000132002 | AACAUUC  |
| ENSG00000132002 | AAUCCUU  |
| ENSG00000132002 | ACAUUCA  |
| ENSG00000132002 | AUCCCUU  |
| ENSG00000132002 | AUCCUUG  |
| ENSG00000132002 | CAGUCCA  |
| ENSG00000132002 | CAGUCUG  |
| ENSG00000132002 | CUUUGGU  |
| ENSG00000132002 | UAUUGCU  |
| ENSG00000132002 | UCCCUUU  |
| ENSG00000132002 | UGAAAGG  |
| ENSG00000132002 | UUGGUCC  |
| ENSG00000132003 | AUGGCUU  |
| ENSG00000132003 | CCAGUGC  |
| ENSG00000132003 | CCAGUGU  |
| ENSG00000132003 | CCCUGAG  |
| ENSG00000132003 | GAGGUUAU |
| ENSG00000132003 | GAGUUGA  |
| ENSG00000132003 | GAGUUGG  |
| ENSG00000132003 | GGGGUGC  |
| ENSG00000132003 | UAAUAUC  |
| ENSG00000132003 | UACAAAG  |
| ENSG00000132003 | UCCUGAG  |
| ENSG00000132003 | UGAAAUG  |
| ENSG00000132004 | AGCACCA  |
| ENSG00000132005 | AAAAACC  |

|                 |          |
|-----------------|----------|
| ENSG00000132005 | AAAGGUA  |
| ENSG00000132005 | AACACUG  |
| ENSG00000132005 | AAGGCAC  |
| ENSG00000132005 | AAUUGCU  |
| ENSG00000132005 | ACAAUUAU |
| ENSG00000132005 | AUACAAG  |
| ENSG00000132005 | AUUGCAC  |
| ENSG00000132005 | CCAUUAC  |
| ENSG00000132005 | CUACAAA  |
| ENSG00000132005 | CUGGGCA  |
| ENSG00000132005 | GUGCAA   |
| ENSG00000132005 | UCACAGG  |
| ENSG00000132005 | UCACCAC  |
| ENSG00000132005 | UGCAAAG  |
| ENSG00000132005 | UGCAGCU  |
| ENSG00000132005 | UGUGUCA  |
| ENSG00000132024 | AAGUGCU  |
| ENSG00000132024 | AGUGCUU  |
| ENSG00000132024 | CAGCUGG  |
| ENSG00000132024 | CUUUGGU  |
| ENSG00000132024 | GAUUGUA  |
| ENSG00000132024 | GUGCAA   |
| ENSG00000132024 | GUGCUUG  |
| ENSG00000132031 | AAUUAUU  |
| ENSG00000132031 | CACAGUG  |
| ENSG00000132031 | GGCUCAG  |
| ENSG00000132031 | UCACAGG  |
| ENSG00000132109 | GAGGCAG  |
| ENSG00000132128 | CAGGAAC  |
| ENSG00000132128 | CUGGGCA  |
| ENSG00000132128 | GCCUGGG  |
| ENSG00000132128 | GGCAGGG  |
| ENSG00000132128 | UGAAAGG  |
| ENSG00000132128 | UUGGUUC  |
| ENSG00000132142 | AAUACUG  |
| ENSG00000132142 | AGCACCA  |
| ENSG00000132142 | AGCAGCA  |
| ENSG00000132142 | AGUGCUG  |
| ENSG00000132142 | AGUGGUU  |
| ENSG00000132142 | GCACCAU  |
| ENSG00000132142 | GGAAGCC  |
| ENSG00000132142 | GGCAGGG  |
| ENSG00000132142 | GGGGCAG  |
| ENSG00000132142 | UCAACAG  |
| ENSG00000132142 | UGUUGAA  |
| ENSG00000132142 | UUCCUCG  |
| ENSG00000132142 | UUGUGAC  |
| ENSG00000132155 | AAAAACC  |
| ENSG00000132155 | AGCAGCA  |
| ENSG00000132155 | AGCAGCG  |
| ENSG00000132155 | AGCAGCU  |
| ENSG00000132155 | GGGGCAG  |
| ENSG00000132155 | UCCUUGC  |
| ENSG00000132182 | AAGGCAC  |
| ENSG00000132182 | AGCAGCA  |
| ENSG00000132182 | CACAGUG  |
| ENSG00000132182 | CCAGUGU  |
| ENSG00000132182 | GGCUCAG  |
| ENSG00000132182 | UCAAGUA  |
| ENSG00000132182 | UCACAGG  |
| ENSG00000132182 | UCACAGU  |
| ENSG00000132182 | UCCUGU   |
| ENSG00000132205 | AAAGCUG  |
| ENSG00000132205 | AUAUUAU  |

|                 |         |
|-----------------|---------|
| ENSG00000132205 | CCCUGUU |
| ENSG00000132205 | UCCCUGU |
| ENSG00000132205 | UGUCUUU |
| ENSG00000132205 | UUUGCAC |
| ENSG00000132254 | AAAACUG |
| ENSG00000132254 | AACUGGU |
| ENSG00000132254 | AGCUGCC |
| ENSG00000132254 | AGUGCUG |
| ENSG00000132254 | AGUGCUU |
| ENSG00000132254 | AGUGGUU |
| ENSG00000132254 | CUUCUCU |
| ENSG00000132254 | CUUUGGU |
| ENSG00000132254 | GAAGGAA |
| ENSG00000132254 | GAGCUGC |
| ENSG00000132254 | GGGUGGU |
| ENSG00000132254 | UGAAAGG |
| ENSG00000132254 | UGACCUA |
| ENSG00000132254 | UGGCCAC |
| ENSG00000132254 | UGGCUGC |
| ENSG00000132254 | UCCUAG  |
| ENSG00000132254 | UUGGUCC |
| ENSG00000132256 | UGUUGAA |
| ENSG00000132286 | CCUUCUU |
| ENSG00000132294 | GGAUGAG |
| ENSG00000132294 | GUGCAA  |
| ENSG00000132294 | UCUCAAG |
| ENSG00000132294 | UGACAUC |
| ENSG00000132305 | UCACAAG |
| ENSG00000132313 | UCCUUU  |
| ENSG00000132321 | AUAUAAC |
| ENSG00000132326 | AAAAAUC |
| ENSG00000132326 | AAAGCUG |
| ENSG00000132326 | AACAAAC |
| ENSG00000132326 | AACAUUC |
| ENSG00000132329 | AAUCACU |
| ENSG00000132334 | AAAAACC |
| ENSG00000132334 | AAAAAUC |
| ENSG00000132334 | AAAGUAU |
| ENSG00000132334 | AACAUUC |
| ENSG00000132334 | AAGGCAC |
| ENSG00000132334 | ACAUUCA |
| ENSG00000132334 | AGGCAGG |
| ENSG00000132334 | AUAAAGU |
| ENSG00000132334 | AUGUAAU |
| ENSG00000132334 | CAAUUGC |
| ENSG00000132334 | CAGCAA  |
| ENSG00000132334 | CCAGUGU |
| ENSG00000132334 | GAAACAU |
| ENSG00000132334 | GACCAUG |
| ENSG00000132334 | GAUCAGA |
| ENSG00000132334 | GCUGGUG |
| ENSG00000132334 | GGCAUUG |
| ENSG00000132334 | GUCAACA |
| ENSG00000132334 | UGCAUAG |
| ENSG00000132334 | UUCUAAU |
| ENSG00000132334 | UUGGCAA |
| ENSG00000132334 | UUGGCAC |
| ENSG00000132341 | AAAACUG |
| ENSG00000132341 | ACAUCAC |
| ENSG00000132341 | ACUGCAG |
| ENSG00000132341 | AGUAACA |
| ENSG00000132341 | CACAGGG |
| ENSG00000132341 | CACCACC |
| ENSG00000132341 | CACUCCU |

|                 |         |
|-----------------|---------|
| ENSG00000132341 | CCUUCAU |
| ENSG00000132341 | CUCCAGC |
| ENSG00000132341 | CUGCAGC |
| ENSG00000132341 | GCAGCAU |
| ENSG00000132341 | GCAGGUU |
| ENSG00000132341 | GCAUCCC |
| ENSG00000132341 | UCACAGG |
| ENSG00000132341 | UGAAAUG |
| ENSG00000132341 | UGACAUC |
| ENSG00000132356 | AAAAACC |
| ENSG00000132356 | CAGUGCA |
| ENSG00000132356 | GCAACUU |
| ENSG00000132356 | GCCUGU  |
| ENSG00000132356 | GGAAGCC |
| ENSG00000132361 | AAAAACC |
| ENSG00000132361 | AAAGUGC |
| ENSG00000132361 | ACAUUCA |
| ENSG00000132361 | AGCAGCA |
| ENSG00000132361 | AUUCAUU |
| ENSG00000132361 | CUGCCCC |
| ENSG00000132361 | GAAACAU |
| ENSG00000132361 | GACCUGG |
| ENSG00000132361 | GAGAAAU |
| ENSG00000132361 | GCAGGUU |
| ENSG00000132361 | GGUUUAC |
| ENSG00000132361 | GUGGGGA |
| ENSG00000132361 | UGAAAUG |
| ENSG00000132361 | UUCAAAU |
| ENSG00000132382 | CUUGUAU |
| ENSG00000132383 | CAGUCUG |
| ENSG00000132383 | GAAGGAA |
| ENSG00000132383 | UAUCAGA |
| ENSG00000132388 | AAAUGGU |
| ENSG00000132388 | AACUGGU |
| ENSG00000132388 | AAGGCAC |
| ENSG00000132388 | AAGGUGC |
| ENSG00000132388 | AAUUAAU |
| ENSG00000132388 | ACAGGUG |
| ENSG00000132388 | ACAUCAC |
| ENSG00000132388 | AGCCAGU |
| ENSG00000132388 | AGCUGCC |
| ENSG00000132388 | AGUGAUC |
| ENSG00000132388 | AUUGCAC |
| ENSG00000132388 | CAAGAGC |
| ENSG00000132388 | CCAGCAU |
| ENSG00000132388 | CCAGUGU |
| ENSG00000132388 | CCUUCAU |
| ENSG00000132388 | CUUCUCU |
| ENSG00000132388 | GAAGGUC |
| ENSG00000132388 | GAGAAGA |
| ENSG00000132388 | GAGACCU |
| ENSG00000132388 | GCAGGAC |
| ENSG00000132388 | GGAAGAC |
| ENSG00000132388 | GGAGUGU |
| ENSG00000132388 | GGCAGUG |
| ENSG00000132388 | GUAAACA |
| ENSG00000132388 | GUGACAG |
| ENSG00000132388 | GUGUCAC |
| ENSG00000132388 | GUUAGGA |
| ENSG00000132388 | UCCUGAG |
| ENSG00000132388 | UCUCAAG |
| ENSG00000132388 | UCUCAA  |
| ENSG00000132388 | UGCAGCU |
| ENSG00000132388 | UGCAUAG |

|                 |          |
|-----------------|----------|
| ENSG00000132388 | UGCAUUAU |
| ENSG00000132388 | UGGUACC  |
| ENSG00000132388 | UGUGCUU  |
| ENSG00000132394 | CUGGGCA  |
| ENSG00000132394 | GAGGCUG  |
| ENSG00000132405 | AAAACUG  |
| ENSG00000132405 | AAAGUAC  |
| ENSG00000132405 | AAUUUUA  |
| ENSG00000132405 | ACAUUCA  |
| ENSG00000132405 | ACUCCAG  |
| ENSG00000132405 | CCAGUGC  |
| ENSG00000132405 | UGGAUAA  |
| ENSG00000132406 | AACAAAC  |
| ENSG00000132406 | AAGGCAC  |
| ENSG00000132424 | ACAUAC   |
| ENSG00000132424 | ACAUUAC  |
| ENSG00000132424 | AGCCCUU  |
| ENSG00000132424 | CAUGGAU  |
| ENSG00000132424 | GCCCUUA  |
| ENSG00000132434 | AACAAAC  |
| ENSG00000132434 | AAGAACC  |
| ENSG00000132434 | GAAACAU  |
| ENSG00000132434 | GUGUCAC  |
| ENSG00000132434 | UGUCUUU  |
| ENSG00000132434 | UGUGUCA  |
| ENSG00000132434 | UUUGCAC  |
| ENSG00000132463 | AAAGUUU  |
| ENSG00000132463 | AAGGCAC  |
| ENSG00000132463 | ACAUUAC  |
| ENSG00000132463 | CAGGAAC  |
| ENSG00000132463 | CAGUCCA  |
| ENSG00000132463 | CCUGAG   |
| ENSG00000132463 | CUUUGGU  |
| ENSG00000132463 | GACAACU  |
| ENSG00000132463 | GAGAACC  |
| ENSG00000132463 | GAGAACU  |
| ENSG00000132463 | GGCAGUG  |
| ENSG00000132463 | GGUUUAC  |
| ENSG00000132463 | UAAUAUC  |
| ENSG00000132463 | UAGGUAU  |
| ENSG00000132463 | UCAUUUG  |
| ENSG00000132463 | UGAAAUG  |
| ENSG00000132463 | UGAAGCU  |
| ENSG00000132463 | UGGACUG  |
| ENSG00000132463 | UUCCUAG  |
| ENSG00000132463 | UUGGUUC  |
| ENSG00000132464 | UUUGCAC  |
| ENSG00000132465 | GGAGAGA  |
| ENSG00000132466 | AAAACUG  |
| ENSG00000132466 | ACACACC  |
| ENSG00000132466 | ACAGUAU  |
| ENSG00000132466 | AUGUAAU  |
| ENSG00000132466 | CUAUACA  |
| ENSG00000132466 | CUCACAC  |
| ENSG00000132466 | GAAGGUC  |
| ENSG00000132466 | GUCAGUU  |
| ENSG00000132466 | UACAGUU  |
| ENSG00000132466 | UCACAUU  |
| ENSG00000132466 | UGCUCAC  |
| ENSG00000132470 | AAGUGCU  |
| ENSG00000132470 | GGUUACC  |
| ENSG00000132470 | UUGGUUC  |
| ENSG00000132471 | AACUGGU  |
| ENSG00000132471 | AUAUUAU  |

|                 |         |
|-----------------|---------|
| ENSG00000132471 | GGAAUGU |
| ENSG00000132471 | GGCAGGG |
| ENSG00000132471 | GGGUUUA |
| ENSG00000132471 | GUGCAA  |
| ENSG00000132471 | UAAUAUC |
| ENSG00000132475 | AAAAACC |
| ENSG00000132475 | AAAACUG |
| ENSG00000132475 | AAACUGU |
| ENSG00000132475 | AAAGCUG |
| ENSG00000132475 | AAAGUAU |
| ENSG00000132475 | AAAUCCC |
| ENSG00000132475 | AAAUUUC |
| ENSG00000132475 | AACAGUC |
| ENSG00000132475 | ACACACC |
| ENSG00000132475 | ACACACU |
| ENSG00000132475 | ACAUCAC |
| ENSG00000132475 | ACCCUGU |
| ENSG00000132475 | AGCCCUU |
| ENSG00000132475 | AUAUAAC |
| ENSG00000132475 | AUCCCUU |
| ENSG00000132475 | AUGAUGC |
| ENSG00000132475 | AUUGCAC |
| ENSG00000132475 | CACACCU |
| ENSG00000132475 | CACUCCU |
| ENSG00000132475 | CCUGUAC |
| ENSG00000132475 | CCUUCUG |
| ENSG00000132475 | CUACAAA |
| ENSG00000132475 | CUAGUAA |
| ENSG00000132475 | CUAGUAG |
| ENSG00000132475 | CUGGACU |
| ENSG00000132475 | CUUACAG |
| ENSG00000132475 | CUUGUAU |
| ENSG00000132475 | GAAACAU |
| ENSG00000132475 | GACCCUG |
| ENSG00000132475 | GAGAAGA |
| ENSG00000132475 | GAGCCCU |
| ENSG00000132475 | GCCCUUA |
| ENSG00000132475 | GGAAUGU |
| ENSG00000132475 | GGUAGAC |
| ENSG00000132475 | GGUUUAC |
| ENSG00000132475 | GUCAACA |
| ENSG00000132475 | UAAGACG |
| ENSG00000132475 | UAAUAGU |
| ENSG00000132475 | UACAAAG |
| ENSG00000132475 | UAUAAUA |
| ENSG00000132475 | UAUUGCU |
| ENSG00000132475 | UCACAGU |
| ENSG00000132475 | UGAGAAG |
| ENSG00000132475 | UGAGGAC |
| ENSG00000132475 | UGCAAAG |
| ENSG00000132475 | UGCAUAU |
| ENSG00000132475 | UGCUCAC |
| ENSG00000132475 | UUAUGCA |
| ENSG00000132478 | AAGACAU |
| ENSG00000132478 | AAGUGUG |
| ENSG00000132478 | ACACACC |
| ENSG00000132478 | ACACACU |
| ENSG00000132478 | AGCACCA |
| ENSG00000132478 | AGCCCUU |
| ENSG00000132478 | AGCUGCC |
| ENSG00000132478 | AGUGCUU |
| ENSG00000132478 | GAGCCCC |
| ENSG00000132478 | GAGCCCU |
| ENSG00000132478 | GCUAGCA |

|                 |         |
|-----------------|---------|
| ENSG00000132478 | GGAAGCC |
| ENSG00000132478 | GUGCUUG |
| ENSG00000132478 | UCGUGCA |
| ENSG00000132478 | UUGGUCC |
| ENSG00000132485 | AAGGCAC |
| ENSG00000132485 | AUGCACC |
| ENSG00000132485 | CUUGUGU |
| ENSG00000132485 | GGCCUG  |
| ENSG00000132485 | GUCUACU |
| ENSG00000132485 | GUGCAA  |
| ENSG00000132485 | UAAUACA |
| ENSG00000132485 | UGGCCCU |
| ENSG00000132485 | UUCUUGU |
| ENSG00000132507 | AACAAAC |
| ENSG00000132507 | CUGCAGG |
| ENSG00000132507 | GCCUGAU |
| ENSG00000132518 | GCCUGGG |
| ENSG00000132518 | GGGGUCC |
| ENSG00000132522 | UGGGACA |
| ENSG00000132535 | CAGUCCA |
| ENSG00000132535 | CUCAAAC |
| ENSG00000132535 | GCAGCAU |
| ENSG00000132535 | GGAAUGU |
| ENSG00000132535 | GGAGGCA |
| ENSG00000132535 | GGGGUGC |
| ENSG00000132535 | GUCUCUG |
| ENSG00000132535 | UCAAGUA |
| ENSG00000132535 | UCUGGAA |
| ENSG00000132535 | UGAGAAU |
| ENSG00000132541 | CCAUUAC |
| ENSG00000132549 | AUACAAG |
| ENSG00000132561 | AAGGCAC |
| ENSG00000132561 | AAUUUA  |
| ENSG00000132563 | AAGGCAC |
| ENSG00000132563 | CAGCAA  |
| ENSG00000132563 | CAGCAGG |
| ENSG00000132563 | CCAGUGU |
| ENSG00000132563 | GCAGAAG |
| ENSG00000132563 | GGGUGGU |
| ENSG00000132589 | CAGUGCA |
| ENSG00000132589 | CCCUGAG |
| ENSG00000132589 | GAGAACU |
| ENSG00000132589 | GCAGCAU |
| ENSG00000132591 | AGCAGCU |
| ENSG00000132591 | CUCAGGG |
| ENSG00000132591 | GAGCUAA |
| ENSG00000132603 | UCAUGAU |
| ENSG00000132603 | UUCAAAU |
| ENSG00000132603 | UUCUUGU |
| ENSG00000132604 | ACAGUAC |
| ENSG00000132604 | GUGCCUG |
| ENSG00000132604 | UUCCUAG |
| ENSG00000132612 | CACUCCU |
| ENSG00000132612 | CUCCAC  |
| ENSG00000132612 | GUCUCUG |
| ENSG00000132612 | UAUAAAG |
| ENSG00000132612 | UCCACC  |
| ENSG00000132622 | AGGCAGG |
| ENSG00000132623 | AUUCAUU |
| ENSG00000132635 | AUGCCUU |
| ENSG00000132635 | GUGACAG |
| ENSG00000132639 | AAUCACU |
| ENSG00000132639 | ACAUCAC |
| ENSG00000132639 | AGCAUUC |

|                 |          |
|-----------------|----------|
| ENSG00000132639 | CUACAAA  |
| ENSG00000132639 | GCUGGUG  |
| ENSG00000132639 | GGAAUGU  |
| ENSG00000132639 | UCAUUCG  |
| ENSG00000132639 | UGCAUAG  |
| ENSG00000132640 | AAGUUGU  |
| ENSG00000132640 | ACAAUUAU |
| ENSG00000132640 | AGUGCCU  |
| ENSG00000132640 | CACUGUU  |
| ENSG00000132640 | CAUAUUG  |
| ENSG00000132640 | CCAGUGU  |
| ENSG00000132640 | CUCUGGG  |
| ENSG00000132640 | GAGGUAG  |
| ENSG00000132640 | GAGGUAU  |
| ENSG00000132640 | GCUAGCA  |
| ENSG00000132640 | GGGUGGU  |
| ENSG00000132640 | UAAUGCU  |
| ENSG00000132640 | UCAACAG  |
| ENSG00000132640 | UCCUGAG  |
| ENSG00000132640 | UGCAUUG  |
| ENSG00000132640 | UUCAAGC  |
| ENSG00000132670 | AACAAAC  |
| ENSG00000132670 | UACAAAG  |
| ENSG00000132680 | AUGCAUU  |
| ENSG00000132680 | UACAAAG  |
| ENSG00000132692 | AACAGUC  |
| ENSG00000132692 | GAAACAU  |
| ENSG00000132692 | UCACAGG  |
| ENSG00000132692 | UCACAGU  |
| ENSG00000132692 | UCCCUGU  |
| ENSG00000132692 | UCCAUA   |
| ENSG00000132694 | AAAGUGC  |
| ENSG00000132694 | AAGUGCA  |
| ENSG00000132694 | ACAUUAC  |
| ENSG00000132694 | CACAGUG  |
| ENSG00000132694 | UGAAAGG  |
| ENSG00000132702 | AAUGCCC  |
| ENSG00000132702 | CAGUUAC  |
| ENSG00000132702 | GUUAAUG  |
| ENSG00000132718 | AAAGAAU  |
| ENSG00000132718 | AAAGCUG  |
| ENSG00000132718 | AAGGCGC  |
| ENSG00000132718 | AGGGAGG  |
| ENSG00000132718 | AUGGAUU  |
| ENSG00000132718 | CAUGGAU  |
| ENSG00000132718 | CUCAAAC  |
| ENSG00000132718 | GACCAUG  |
| ENSG00000132718 | GAGGCAG  |
| ENSG00000132718 | GAGGUAG  |
| ENSG00000132718 | GAGGUAU  |
| ENSG00000132718 | GGGUCUU  |
| ENSG00000132718 | GUCACUC  |
| ENSG00000132718 | GUGACUG  |
| ENSG00000132718 | UCAUUUG  |
| ENSG00000132718 | UCCAGAG  |
| ENSG00000132718 | UCCCACA  |
| ENSG00000132718 | UCCUGAG  |
| ENSG00000132718 | UGAGAAG  |
| ENSG00000132718 | UGGAGAU  |
| ENSG00000132749 | AAAGUAU  |
| ENSG00000132749 | AAGUGCA  |
| ENSG00000132763 | GAGCUGC  |
| ENSG00000132773 | UUUUUGC  |
| ENSG00000132780 | AAAGAAU  |



|                 |         |
|-----------------|---------|
| ENSG00000132780 | ACAUUAC |
| ENSG00000132780 | GCACCAU |
| ENSG00000132792 | CAAAACU |
| ENSG00000132793 | AAAGCUG |
| ENSG00000132793 | AGGCAGG |
| ENSG00000132801 | AGCAGCA |
| ENSG00000132819 | AAAAAUC |
| ENSG00000132819 | AUAUUAU |
| ENSG00000132819 | CCCUGAG |
| ENSG00000132819 | GAGGUAG |
| ENSG00000132819 | GAGGUAU |
| ENSG00000132819 | UUCUAAU |
| ENSG00000132821 | CAAAACU |
| ENSG00000132821 | CCGAGCC |
| ENSG00000132821 | CCUGCUG |
| ENSG00000132821 | CUGCUCA |
| ENSG00000132821 | GGGUGGU |
| ENSG00000132821 | GUGCAA  |
| ENSG00000132821 | UACAAAG |
| ENSG00000132821 | UGGCUGC |
| ENSG00000132823 | AUUGCAC |
| ENSG00000132823 | CACAGUG |
| ENSG00000132823 | UAUUGCU |
| ENSG00000132824 | AUAUUAU |
| ENSG00000132825 | AAGGCAC |
| ENSG00000132825 | AGCACCA |
| ENSG00000132825 | AUUGCAC |
| ENSG00000132825 | CCAGUGC |
| ENSG00000132825 | UCCUGAG |
| ENSG00000132825 | UGACCUA |
| ENSG00000132842 | GUCCAGA |
| ENSG00000132842 | GUGCCAC |
| ENSG00000132842 | UAUAAAG |
| ENSG00000132842 | UGAAAGG |
| ENSG00000132849 | AAUGUUG |
| ENSG00000132849 | GAAAACA |
| ENSG00000132849 | GUUAAUG |
| ENSG00000132849 | UAAUGCU |
| ENSG00000132849 | UUGUGAC |
| ENSG00000132854 | AAAAGUA |
| ENSG00000132854 | AAAGUAU |
| ENSG00000132854 | AAGGCAC |
| ENSG00000132854 | AUGUGCC |
| ENSG00000132854 | CUACAAA |
| ENSG00000132854 | GAGGCAG |
| ENSG00000132854 | GGAAUGU |
| ENSG00000132854 | GGAGGAG |
| ENSG00000132854 | GGAGUCC |
| ENSG00000132854 | GUAUGUU |
| ENSG00000132854 | UACAAAG |
| ENSG00000132854 | UAUUGCU |
| ENSG00000132854 | UGACAUC |
| ENSG00000132854 | UUCUAAU |
| ENSG00000132854 | UUGACAC |
| ENSG00000132854 | UUGUUCG |
| ENSG00000132872 | AAAACUG |
| ENSG00000132872 | AAAGUAA |
| ENSG00000132872 | AAAGUAU |
| ENSG00000132872 | AGCCCUU |
| ENSG00000132872 | AUGCAUU |
| ENSG00000132872 | CAGUGCA |
| ENSG00000132872 | CUCAAAC |
| ENSG00000132872 | CUUUGGU |
| ENSG00000132872 | UGCAUAG |

|                 |         |
|-----------------|---------|
| ENSG00000132874 | GCAGAAG |
| ENSG00000132874 | GGGAGCU |
| ENSG00000132879 | UCUCCAA |
| ENSG00000132879 | UGAAAUG |
| ENSG00000132911 | CACAGUG |
| ENSG00000132912 | AAGGCAC |
| ENSG00000132912 | AAGUGCU |
| ENSG00000132912 | ACAUUAC |
| ENSG00000132932 | CAAAGCA |
| ENSG00000132932 | CACACCG |
| ENSG00000132932 | CUCCCAA |
| ENSG00000132932 | CUCCCAC |
| ENSG00000132932 | GGCUGCG |
| ENSG00000132932 | UCACACA |
| ENSG00000132953 | AAUGCCC |
| ENSG00000132953 | ACUGCAU |
| ENSG00000132953 | AGCAGCA |
| ENSG00000132953 | AGCAGCG |
| ENSG00000132953 | AGGACAC |
| ENSG00000132953 | AGUGCAA |
| ENSG00000132953 | CACAAUG |
| ENSG00000132953 | CCUUCAU |
| ENSG00000132953 | GACCAUG |
| ENSG00000132953 | UAAUAUC |
| ENSG00000132953 | UACAGUU |
| ENSG00000132953 | UAGUGAG |
| ENSG00000132953 | UCACACA |
| ENSG00000132953 | UCCCUUU |
| ENSG00000132953 | UGAAAUG |
| ENSG00000132953 | UGACCUA |
| ENSG00000132953 | UUCUCG  |
| ENSG00000132953 | UUGGUCC |
| ENSG00000132964 | AAACUGU |
| ENSG00000132964 | AAGUAGC |
| ENSG00000132964 | ACAUUCA |
| ENSG00000132964 | AUGCAUU |
| ENSG00000132964 | CAGUGCA |
| ENSG00000132964 | CUGCAGC |
| ENSG00000132964 | UCACAGG |
| ENSG00000132964 | UCACAGU |
| ENSG00000132964 | UGCAUUG |
| ENSG00000132970 | AAGACAU |
| ENSG00000132970 | ACAUCAC |
| ENSG00000132970 | AGAUGUG |
| ENSG00000132970 | AUGGAUU |
| ENSG00000132970 | GCAGCAU |
| ENSG00000132970 | GUGCUUG |
| ENSG00000132970 | UCACAAG |
| ENSG00000132970 | UCACAUU |
| ENSG00000132970 | UGUGCUU |
| ENSG00000133026 | AAAAAUC |
| ENSG00000133026 | AAAGCUG |
| ENSG00000133026 | AAAUUUC |
| ENSG00000133026 | AACAUUC |
| ENSG00000133026 | AAGACAU |
| ENSG00000133026 | ACAGUAU |
| ENSG00000133026 | ACAUUAC |
| ENSG00000133026 | ACAUUCA |
| ENSG00000133026 | ACUUGGA |
| ENSG00000133026 | AGCCAGU |
| ENSG00000133026 | AUACAAG |
| ENSG00000133026 | AUAUAAC |
| ENSG00000133026 | CAAAGCA |
| ENSG00000133026 | CACAGUG |

|                 |         |
|-----------------|---------|
| ENSG00000133026 | CCAGUAC |
| ENSG00000133026 | CUGCCCC |
| ENSG00000133026 | CUUACAG |
| ENSG00000133026 | GAUAUGU |
| ENSG00000133026 | GGUGGUU |
| ENSG00000133026 | GUAAACA |
| ENSG00000133026 | GUCACUC |
| ENSG00000133026 | UAAGACG |
| ENSG00000133026 | UAAGACU |
| ENSG00000133026 | UACAAAG |
| ENSG00000133026 | UCAACAG |
| ENSG00000133026 | UCACAGG |
| ENSG00000133026 | UGUCUGG |
| ENSG00000133027 | AAGGCAC |
| ENSG00000133030 | AAUACUG |
| ENSG00000133030 | AGCUUUA |
| ENSG00000133030 | GUGCAA  |
| ENSG00000133030 | UAAUACA |
| ENSG00000133048 | GGCUCAG |
| ENSG00000133056 | AAAACUG |
| ENSG00000133056 | ACAGUAC |
| ENSG00000133056 | AGGACAC |
| ENSG00000133056 | GCUUCCU |
| ENSG00000133056 | GGCUCUG |
| ENSG00000133056 | GUUAGGA |
| ENSG00000133056 | UCAUUUG |
| ENSG00000133056 | UCCCUUG |
| ENSG00000133056 | UCCUAUA |
| ENSG00000133056 | UUGACAC |
| ENSG00000133065 | AAAGUGC |
| ENSG00000133065 | AAGACAU |
| ENSG00000133065 | AAGUGCA |
| ENSG00000133065 | CUCAAAC |
| ENSG00000133065 | CUGCUC  |
| ENSG00000133065 | GAGGCUG |
| ENSG00000133065 | GAUUGUA |
| ENSG00000133065 | GGAGGCA |
| ENSG00000133065 | GGCUCAG |
| ENSG00000133065 | UAAGACG |
| ENSG00000133065 | UAAGACU |
| ENSG00000133065 | UAUCAGA |
| ENSG00000133065 | UGACAUC |
| ENSG00000133065 | UGUAUAA |
| ENSG00000133065 | UUGGUCC |
| ENSG00000133069 | ACUCCAG |
| ENSG00000133069 | CCUGAG  |
| ENSG00000133069 | GAGGCUG |
| ENSG00000133069 | UCCAGAG |
| ENSG00000133069 | UCCUGU  |
| ENSG00000133083 | AACAGUC |
| ENSG00000133083 | ACUGCAU |
| ENSG00000133083 | AGCAGCG |
| ENSG00000133083 | AGCAGCU |
| ENSG00000133083 | AUGCCUU |
| ENSG00000133083 | CUCAAAC |
| ENSG00000133083 | GAGUUGA |
| ENSG00000133083 | GAUCAGA |
| ENSG00000133083 | GCACCAU |
| ENSG00000133083 | GCAGCAU |
| ENSG00000133083 | GCUACAU |
| ENSG00000133083 | GUGCUUG |
| ENSG00000133083 | UACAAAG |
| ENSG00000133083 | UAUUGCU |
| ENSG00000133083 | UUCAAAU |

|                 |          |
|-----------------|----------|
| ENSG00000133083 | UUCAAGC  |
| ENSG00000133083 | UUCUGCA  |
| ENSG00000133083 | UUGAGGC  |
| ENSG00000133083 | UUGGUUC  |
| ENSG00000133101 | AUAUUAU  |
| ENSG00000133104 | AAGUAGC  |
| ENSG00000133104 | AGCUUUAU |
| ENSG00000133104 | GUGCAAA  |
| ENSG00000133104 | UUCAAAU  |
| ENSG00000133104 | UUCUAAU  |
| ENSG00000133105 | AGCUGCC  |
| ENSG00000133105 | AGUGCAA  |
| ENSG00000133107 | CUACAAA  |
| ENSG00000133110 | AAAGUUU  |
| ENSG00000133111 | AAAGUAA  |
| ENSG00000133111 | CAA AUGC |
| ENSG00000133112 | CAGUCCA  |
| ENSG00000133116 | ACCCUGU  |
| ENSG00000133121 | AAAAAUC  |
| ENSG00000133121 | ACAAUAU  |
| ENSG00000133121 | ACCCUGU  |
| ENSG00000133121 | AGCAAAA  |
| ENSG00000133121 | AGUGCAA  |
| ENSG00000133121 | AUAUUAU  |
| ENSG00000133121 | AUUGCAC  |
| ENSG00000133121 | CCCUGUC  |
| ENSG00000133121 | CUCCAGC  |
| ENSG00000133121 | GCAGAAG  |
| ENSG00000133121 | UCCUGU   |
| ENSG00000133121 | UGUCUUU  |
| ENSG00000133121 | UUGACAC  |
| ENSG00000133121 | UUGGUCC  |
| ENSG00000133121 | UUGGUUC  |
| ENSG00000133131 | AAGGCAC  |
| ENSG00000133134 | ACAAUAU  |
| ENSG00000133138 | GUGCUUG  |
| ENSG00000133142 | UUCUGCA  |
| ENSG00000133193 | AAAGAAU  |
| ENSG00000133193 | AAUUGCU  |
| ENSG00000133193 | AGCAAAA  |
| ENSG00000133193 | AGGUAGU  |
| ENSG00000133193 | CAAAGCA  |
| ENSG00000133193 | CAGCAAA  |
| ENSG00000133193 | GAGGUAG  |
| ENSG00000133193 | GCAGCAU  |
| ENSG00000133193 | GUAAACA  |
| ENSG00000133193 | GUGCAAA  |
| ENSG00000133193 | UCACAGG  |
| ENSG00000133193 | UCACAGU  |
| ENSG00000133193 | UGAAAUG  |
| ENSG00000133195 | AAUCACU  |
| ENSG00000133195 | AGUGCUU  |
| ENSG00000133195 | CACAGUG  |
| ENSG00000133195 | GUAAACA  |
| ENSG00000133216 | AAAAAUC  |
| ENSG00000133216 | AAAGGUA  |
| ENSG00000133216 | AACAAAC  |
| ENSG00000133216 | AGCCCUU  |
| ENSG00000133216 | CGCCCUU  |
| ENSG00000133216 | CUCCCAA  |
| ENSG00000133216 | CUUUGGU  |
| ENSG00000133216 | GUAAACA  |
| ENSG00000133216 | GUGAAUG  |
| ENSG00000133216 | UCACAGU  |

|                 |          |
|-----------------|----------|
| ENSG00000133216 | UCACAUU  |
| ENSG00000133216 | UGCAUUAU |
| ENSG00000133226 | AAAUUUC  |
| ENSG00000133226 | AACAAAC  |
| ENSG00000133226 | CUCAAAC  |
| ENSG00000133247 | AUGGCUU  |
| ENSG00000133247 | CCCUGAG  |
| ENSG00000133247 | UCAAGUA  |
| ENSG00000133247 | UCCUGAG  |
| ENSG00000133256 | AAAAACC  |
| ENSG00000133265 | GCCUGGG  |
| ENSG00000133275 | AAGUCUU  |
| ENSG00000133275 | CUGGACU  |
| ENSG00000133275 | CUUUGGU  |
| ENSG00000133275 | GCAGCAU  |
| ENSG00000133275 | GUUAAUG  |
| ENSG00000133275 | UCAUUUG  |
| ENSG00000133316 | CAAAGUG  |
| ENSG00000133316 | UACAAAG  |
| ENSG00000133318 | AAAAGUA  |
| ENSG00000133318 | AAAGUAC  |
| ENSG00000133318 | ACCACAG  |
| ENSG00000133318 | CAGGCUC  |
| ENSG00000133318 | CAGUUAC  |
| ENSG00000133318 | GGAAGCC  |
| ENSG00000133318 | GGAAUGU  |
| ENSG00000133318 | GGGGCAG  |
| ENSG00000133318 | UAAUACA  |
| ENSG00000133392 | AAGGCAC  |
| ENSG00000133392 | UAGUGAG  |
| ENSG00000133393 | AUCCUUG  |
| ENSG00000133393 | CUCUCC   |
| ENSG00000133393 | GAGGUAG  |
| ENSG00000133393 | GAGGUAU  |
| ENSG00000133393 | GUCUCUG  |
| ENSG00000133401 | AACACUG  |
| ENSG00000133401 | AAGGCAC  |
| ENSG00000133401 | AAGUGUG  |
| ENSG00000133401 | AUAUUUAU |
| ENSG00000133401 | AUGCACC  |
| ENSG00000133401 | AUGCCUU  |
| ENSG00000133401 | CAUAUUG  |
| ENSG00000133401 | GACUCC   |
| ENSG00000133401 | GGAUUUC  |
| ENSG00000133401 | GGAUUUU  |
| ENSG00000133401 | UAUUGCU  |
| ENSG00000133401 | UCCUGAG  |
| ENSG00000133401 | UUGGCAA  |
| ENSG00000133424 | AACAGUC  |
| ENSG00000133424 | CAGUCUG  |
| ENSG00000133424 | CCAGUGC  |
| ENSG00000133424 | GGGCCCC  |
| ENSG00000133454 | CUGGCUC  |
| ENSG00000133454 | GGCUCUG  |
| ENSG00000133454 | UCUUGAG  |
| ENSG00000133466 | AGCACCA  |
| ENSG00000133466 | UCUAGAG  |
| ENSG00000133477 | CCCUGAG  |
| ENSG00000133477 | CUCUCC   |
| ENSG00000133477 | GUAAACA  |
| ENSG00000133477 | GUGCAAA  |
| ENSG00000133488 | CUCCAGC  |
| ENSG00000133606 | AAGUGCU  |
| ENSG00000133606 | ACACACU  |

|                 |         |
|-----------------|---------|
| ENSG00000133606 | ACCACAG |
| ENSG00000133606 | ACCUGGA |
| ENSG00000133606 | AGUGCUU |
| ENSG00000133606 | CAGUAGU |
| ENSG00000133606 | CUUACAG |
| ENSG00000133606 | GAGACCU |
| ENSG00000133606 | GGUUACC |
| ENSG00000133606 | GUGCAAA |
| ENSG00000133606 | UACAAAG |
| ENSG00000133627 | AGGACAC |
| ENSG00000133627 | AUGGCUU |
| ENSG00000133627 | UCAUACA |
| ENSG00000133636 | AAAAAUC |
| ENSG00000133639 | AAAGGUA |
| ENSG00000133639 | ACCACAG |
| ENSG00000133639 | AGCUGCC |
| ENSG00000133639 | CUUCACC |
| ENSG00000133639 | GCUAGCA |
| ENSG00000133639 | UACAAAG |
| ENSG00000133639 | UCACAAG |
| ENSG00000133639 | UCACAGU |
| ENSG00000133639 | UCCAGUU |
| ENSG00000133639 | UGAUCCA |
| ENSG00000133639 | UUCCAUA |
| ENSG00000133639 | UUCUAAU |
| ENSG00000133657 | AAGUGCA |
| ENSG00000133657 | AAUGCCC |
| ENSG00000133657 | ACAUCAC |
| ENSG00000133657 | ACUCAAA |
| ENSG00000133657 | AGUGAUC |
| ENSG00000133657 | AGUGCAA |
| ENSG00000133657 | AUACAAG |
| ENSG00000133657 | AUGGCAC |
| ENSG00000133657 | CCCUGAG |
| ENSG00000133657 | UCACAAG |
| ENSG00000133657 | UCAUAGA |
| ENSG00000133657 | UGCAGCU |
| ENSG00000133657 | UGCAUAG |
| ENSG00000133657 | UUCAAGC |
| ENSG00000133657 | UUGACAC |
| ENSG00000133687 | AAAGUAC |
| ENSG00000133703 | AAAGUAC |
| ENSG00000133703 | AAAUUUC |
| ENSG00000133703 | AAUACUG |
| ENSG00000133703 | AAUCUCU |
| ENSG00000133703 | AAUGUUG |
| ENSG00000133703 | ACUCAAA |
| ENSG00000133703 | ACUGGAU |
| ENSG00000133703 | ACUGGCU |
| ENSG00000133703 | AGCAAAA |
| ENSG00000133703 | AUACAAG |
| ENSG00000133703 | AUGCACC |
| ENSG00000133703 | CUACAAA |
| ENSG00000133703 | CUAUACA |
| ENSG00000133703 | GCACCAU |
| ENSG00000133703 | GGAAUGU |
| ENSG00000133703 | GGCAUUG |
| ENSG00000133703 | GUAAACA |
| ENSG00000133703 | GUCAUUG |
| ENSG00000133703 | GUUAAUG |
| ENSG00000133703 | GUUCAUG |
| ENSG00000133703 | UACAGUU |
| ENSG00000133703 | UAUUACC |
| ENSG00000133703 | UCACAAG |

|                 |          |
|-----------------|----------|
| ENSG00000133703 | UCAUGAU  |
| ENSG00000133703 | UGCAUUAU |
| ENSG00000133703 | UUCCUAG  |
| ENSG00000133703 | UUGUGAC  |
| ENSG00000133704 | AAGGCAC  |
| ENSG00000133704 | ACAGUAC  |
| ENSG00000133704 | ACAGUAU  |
| ENSG00000133704 | ACCCUGU  |
| ENSG00000133704 | CACUGUU  |
| ENSG00000133704 | GCUGGUG  |
| ENSG00000133704 | GUGCUUG  |
| ENSG00000133704 | UACAGUU  |
| ENSG00000133704 | UCACAUU  |
| ENSG00000133706 | UCUCCAA  |
| ENSG00000133731 | UGAAAUG  |
| ENSG00000133739 | UGGAGAU  |
| ENSG00000133740 | AAGGCAC  |
| ENSG00000133740 | UUGGCAC  |
| ENSG00000133789 | ACAGUAC  |
| ENSG00000133789 | ACAGUAU  |
| ENSG00000133789 | AGCAGCA  |
| ENSG00000133794 | AAAAACC  |
| ENSG00000133794 | AUGGCUU  |
| ENSG00000133794 | CUUACAG  |
| ENSG00000133794 | UGAAAUG  |
| ENSG00000133805 | AAAGUGC  |
| ENSG00000133805 | AAGGCAC  |
| ENSG00000133805 | AGUAACA  |
| ENSG00000133805 | GAGGCUG  |
| ENSG00000133812 | AACAUUC  |
| ENSG00000133812 | AUACAAG  |
| ENSG00000133812 | CACAGGG  |
| ENSG00000133812 | GGUGGUU  |
| ENSG00000133812 | UAUAAAG  |
| ENSG00000133818 | AAAGUAU  |
| ENSG00000133818 | AUCCCUU  |
| ENSG00000133818 | GGAAGAC  |
| ENSG00000133818 | UGAGAAU  |
| ENSG00000133872 | CAGCAA   |
| ENSG00000133874 | AAAAAUC  |
| ENSG00000133874 | AAAUUUC  |
| ENSG00000133874 | AGCACCA  |
| ENSG00000133874 | CCAGUAC  |
| ENSG00000133874 | GAGGCAG  |
| ENSG00000133874 | GGAGGCA  |
| ENSG00000133874 | GUAAACA  |
| ENSG00000133874 | UUAGAGA  |
| ENSG00000133884 | ACCAGCA  |
| ENSG00000133884 | ACCCUGU  |
| ENSG00000133884 | CCCUGAG  |
| ENSG00000133884 | GAGGUAG  |
| ENSG00000133884 | GUGAAUG  |
| ENSG00000133884 | GUGGCC   |
| ENSG00000133884 | UAGGGCC  |
| ENSG00000133895 | UUCCUCG  |
| ENSG00000133935 | AAAAACC  |
| ENSG00000133935 | AAAGUAC  |
| ENSG00000133935 | AGCAGCA  |
| ENSG00000133935 | AGCCCUU  |
| ENSG00000133935 | CAGCAGA  |
| ENSG00000133935 | CUCUGGG  |
| ENSG00000133935 | CUGGAAA  |
| ENSG00000133935 | GAAGGUC  |
| ENSG00000133935 | UACAAAG  |

|                 |         |
|-----------------|---------|
| ENSG00000133935 | UAUUACC |
| ENSG00000133935 | UCCCACA |
| ENSG00000133937 | GUGCAAA |
| ENSG00000133961 | AAUACUG |
| ENSG00000133961 | UUGGCAA |
| ENSG00000133961 | UUGGCAC |
| ENSG00000133985 | AAAGUGC |
| ENSG00000133985 | AAGGCAC |
| ENSG00000133985 | AAGUAGC |
| ENSG00000133985 | AAGUGCU |
| ENSG00000133985 | AAUCUCA |
| ENSG00000133985 | AAUCUCU |
| ENSG00000133985 | AGCCAGU |
| ENSG00000133985 | AGCUGCC |
| ENSG00000133985 | AGGCAGG |
| ENSG00000133985 | AUUCAUU |
| ENSG00000133985 | CAAAGCA |
| ENSG00000133985 | CACAGUG |
| ENSG00000133985 | CAGUCUG |
| ENSG00000133985 | CCAGUGU |
| ENSG00000133985 | CCUUCUG |
| ENSG00000133985 | CUAGGCU |
| ENSG00000133985 | CUGCAGC |
| ENSG00000133985 | CUGCAGG |
| ENSG00000133985 | GCUUCCU |
| ENSG00000133985 | GUCAUUG |
| ENSG00000133985 | GUGAAUG |
| ENSG00000133985 | UAUUGCU |
| ENSG00000133985 | UGUAUGU |
| ENSG00000133985 | UGUGUGG |
| ENSG00000133985 | UGUUGAA |
| ENSG00000133997 | GAGGUAG |
| ENSG00000133997 | GAGUCUU |
| ENSG00000134001 | AAAGUGC |
| ENSG00000134001 | AAGGCAC |
| ENSG00000134001 | AAUUUUA |
| ENSG00000134001 | ACUGGAU |
| ENSG00000134001 | CUGGAAA |
| ENSG00000134001 | GAAGGAA |
| ENSG00000134001 | UCCCACA |
| ENSG00000134001 | UCCCACC |
| ENSG00000134001 | UGGACUG |
| ENSG00000134001 | UUAGGAU |
| ENSG00000134001 | UUGGCAA |
| ENSG00000134001 | UUGGCAC |
| ENSG00000134013 | AUGACAC |
| ENSG00000134013 | UCCUGAG |
| ENSG00000134030 | ACAUUCA |
| ENSG00000134030 | AGCAGCA |
| ENSG00000134030 | AGCUGCC |
| ENSG00000134030 | CAAAGCA |
| ENSG00000134030 | CAAAGUG |
| ENSG00000134030 | CUCCCAC |
| ENSG00000134030 | CUGGGGG |
| ENSG00000134030 | GCAGAAG |
| ENSG00000134030 | GGCAAGA |
| ENSG00000134030 | GGCCUG  |
| ENSG00000134030 | GGGCCCC |
| ENSG00000134030 | GGGGCAG |
| ENSG00000134030 | GGGGUCC |
| ENSG00000134030 | GGUUUAC |
| ENSG00000134030 | UCCCACA |
| ENSG00000134030 | UCUGGAG |
| ENSG00000134030 | UGGCCCU |



|                 |         |
|-----------------|---------|
| ENSG00000134030 | UUCAAGC |
| ENSG00000134042 | AAGUGUG |
| ENSG00000134042 | CCUGCUG |
| ENSG00000134042 | GGAUUUU |
| ENSG00000134046 | AAAAAUC |
| ENSG00000134046 | AAACUGU |
| ENSG00000134046 | ACAUCAC |
| ENSG00000134046 | ACCCUGU |
| ENSG00000134046 | ACUCAAA |
| ENSG00000134046 | AGUGCUG |
| ENSG00000134046 | AGUGCUU |
| ENSG00000134046 | CAGUAGA |
| ENSG00000134046 | CAUAUUG |
| ENSG00000134046 | CUUGGGC |
| ENSG00000134046 | GGAAGAC |
| ENSG00000134046 | GGCAUUG |
| ENSG00000134046 | GUGAAUG |
| ENSG00000134046 | UACAGUU |
| ENSG00000134056 | UGUGCUU |
| ENSG00000134057 | AAUUUUA |
| ENSG00000134058 | CCAGUGU |
| ENSG00000134058 | GUCCAGA |
| ENSG00000134058 | UACAAAG |
| ENSG00000134070 | AGCAGCG |
| ENSG00000134070 | AGCAGCU |
| ENSG00000134072 | UCCCUUG |
| ENSG00000134075 | AACAUUC |
| ENSG00000134075 | AGCAGCA |
| ENSG00000134075 | UUCAAGC |
| ENSG00000134077 | AAGGCAC |
| ENSG00000134086 | ACAUCAC |
| ENSG00000134108 | UCCCUUU |
| ENSG00000134109 | ACAUUAC |
| ENSG00000134109 | CAGUAGA |
| ENSG00000134109 | CAUAUUG |
| ENSG00000134109 | CCCACCU |
| ENSG00000134109 | CUGCAGG |
| ENSG00000134109 | GAGCCCU |
| ENSG00000134109 | UACAAAG |
| ENSG00000134109 | UCUGGAA |
| ENSG00000134109 | UGAAAGG |
| ENSG00000134109 | UGCCUG  |
| ENSG00000134121 | ACCCUGU |
| ENSG00000134121 | AGGGUUG |
| ENSG00000134121 | AUAUUUA |
| ENSG00000134121 | AUGCCUU |
| ENSG00000134121 | CACAGGG |
| ENSG00000134121 | GACCCUG |
| ENSG00000134121 | UCAUGAU |
| ENSG00000134121 | UGUGCUU |
| ENSG00000134121 | UUGGCAA |
| ENSG00000134138 | AAAACUG |
| ENSG00000134138 | AAAAGUA |
| ENSG00000134138 | AAAGCUG |
| ENSG00000134138 | AACAUUC |
| ENSG00000134138 | AAGUCUU |
| ENSG00000134138 | ACAAUUA |
| ENSG00000134138 | ACAUAGA |
| ENSG00000134138 | AGCUGCC |
| ENSG00000134138 | AGUAGUU |
| ENSG00000134138 | AGUGUGC |
| ENSG00000134138 | AUACAAG |
| ENSG00000134138 | CAAAGUG |
| ENSG00000134138 | CACAGUG |

|                 |          |
|-----------------|----------|
| ENSG00000134138 | CAGCAGA  |
| ENSG00000134138 | CAGUAGU  |
| ENSG00000134138 | CUGGAAA  |
| ENSG00000134138 | GAAACAU  |
| ENSG00000134138 | GAGAAAU  |
| ENSG00000134138 | GAGGUAG  |
| ENSG00000134138 | GAGGUAU  |
| ENSG00000134138 | GCUGUCU  |
| ENSG00000134138 | GUAAACA  |
| ENSG00000134138 | GUAACAG  |
| ENSG00000134138 | GUAUUCU  |
| ENSG00000134138 | UAAUAGU  |
| ENSG00000134138 | UACAGUU  |
| ENSG00000134138 | UAGUGAG  |
| ENSG00000134138 | UAUAAAAG |
| ENSG00000134138 | UCAACAG  |
| ENSG00000134138 | UCACAGU  |
| ENSG00000134138 | UCAUACA  |
| ENSG00000134138 | UCUGGAA  |
| ENSG00000134138 | UGUCUGG  |
| ENSG00000134138 | UUGGUCC  |
| ENSG00000134138 | UUUCAAC  |
| ENSG00000134146 | UUCAAAU  |
| ENSG00000134152 | AAGGCAC  |
| ENSG00000134152 | ACAAUUAU |
| ENSG00000134152 | AGCUGCC  |
| ENSG00000134152 | AGUAGUU  |
| ENSG00000134152 | AGUGCAA  |
| ENSG00000134152 | CAGCAA   |
| ENSG00000134152 | GAGGUAG  |
| ENSG00000134152 | GUAAACA  |
| ENSG00000134152 | UAGAGGA  |
| ENSG00000134152 | UCAUAGA  |
| ENSG00000134152 | UUCCUAG  |
| ENSG00000134153 | UGACCUA  |
| ENSG00000134186 | AAGGCAC  |
| ENSG00000134186 | UGAUCCA  |
| ENSG00000134198 | AGAUGUG  |
| ENSG00000134198 | GAGAAAU  |
| ENSG00000134198 | GAGGUAG  |
| ENSG00000134198 | GAUUGUA  |
| ENSG00000134198 | GAUUGUC  |
| ENSG00000134198 | GUAAACA  |
| ENSG00000134198 | UGUCUGC  |
| ENSG00000134198 | UGUCUGG  |
| ENSG00000134198 | UCCAUA   |
| ENSG00000134202 | AAAGAGC  |
| ENSG00000134207 | AAAGUUU  |
| ENSG00000134207 | AACAAAC  |
| ENSG00000134207 | AAGACAU  |
| ENSG00000134207 | AAGUGCA  |
| ENSG00000134207 | ACAUCAC  |
| ENSG00000134207 | AUAAAAGU |
| ENSG00000134207 | CAAAACU  |
| ENSG00000134207 | CACUCCU  |
| ENSG00000134207 | GAAACAU  |
| ENSG00000134207 | GCAGCAU  |
| ENSG00000134207 | GGCAAGA  |
| ENSG00000134207 | GGGUAAG  |
| ENSG00000134207 | GGUGGUU  |
| ENSG00000134207 | GUGAAUG  |
| ENSG00000134207 | UCUGGAG  |
| ENSG00000134207 | UGCAGCU  |
| ENSG00000134207 | UUCAAAU  |

|                 |          |
|-----------------|----------|
| ENSG00000134207 | UUGGAGG  |
| ENSG00000134207 | UUUCAAC  |
| ENSG00000134215 | AACAUUC  |
| ENSG00000134215 | AGCCCUU  |
| ENSG00000134215 | CACAGUG  |
| ENSG00000134215 | CCCUGAG  |
| ENSG00000134215 | GAGGUAG  |
| ENSG00000134215 | GAGGUAU  |
| ENSG00000134215 | GGCAAGA  |
| ENSG00000134215 | GGCAGGG  |
| ENSG00000134215 | GUAAACA  |
| ENSG00000134215 | GUCAGUU  |
| ENSG00000134215 | UAAGACG  |
| ENSG00000134215 | UGAAAUG  |
| ENSG00000134215 | UGACAUC  |
| ENSG00000134215 | UGCCCUG  |
| ENSG00000134215 | UGUCUUU  |
| ENSG00000134215 | UUCUUGU  |
| ENSG00000134222 | AGUGGUU  |
| ENSG00000134243 | AGCAGCA  |
| ENSG00000134243 | AUAAAAGU |
| ENSG00000134243 | AUAUAAC  |
| ENSG00000134243 | CAAAGCA  |
| ENSG00000134243 | CAAAGUC  |
| ENSG00000134243 | CAGUCUG  |
| ENSG00000134243 | CCCUGAG  |
| ENSG00000134243 | CCUGCUG  |
| ENSG00000134243 | CUAUACA  |
| ENSG00000134243 | CUGCUCU  |
| ENSG00000134243 | CUGGCUC  |
| ENSG00000134243 | CUUGGAG  |
| ENSG00000134243 | CUUUGGU  |
| ENSG00000134243 | GACCCUG  |
| ENSG00000134243 | GGAAGAC  |
| ENSG00000134243 | GGAAGCC  |
| ENSG00000134243 | GGUGGGC  |
| ENSG00000134243 | UAAUAGU  |
| ENSG00000134243 | UACAGUU  |
| ENSG00000134243 | UCCCUUG  |
| ENSG00000134243 | UCCUGAG  |
| ENSG00000134243 | UUGGCAC  |
| ENSG00000134243 | UUGGUUC  |
| ENSG00000134245 | CUUGUGU  |
| ENSG00000134245 | GAGGUAU  |
| ENSG00000134245 | GCAACUU  |
| ENSG00000134247 | AAAGUGC  |
| ENSG00000134247 | AAAUGGU  |
| ENSG00000134247 | AAGUGCA  |
| ENSG00000134247 | AAGUUGU  |
| ENSG00000134247 | AAUUGCU  |
| ENSG00000134247 | ACAGUAU  |
| ENSG00000134247 | AGUGCAA  |
| ENSG00000134247 | AGUGCCG  |
| ENSG00000134247 | CAAAGCA  |
| ENSG00000134247 | CACAGUG  |
| ENSG00000134247 | CAGUCUG  |
| ENSG00000134247 | CCCACCG  |
| ENSG00000134247 | CUGGGCA  |
| ENSG00000134247 | CUUUGGU  |
| ENSG00000134247 | GAGAACU  |
| ENSG00000134247 | GAGCGCC  |
| ENSG00000134247 | GGAAGAC  |
| ENSG00000134247 | GGCUGCG  |
| ENSG00000134247 | UCCACC   |

|                 |          |
|-----------------|----------|
| ENSG00000134247 | UGCAAAG  |
| ENSG00000134247 | UGCAUAG  |
| ENSG00000134247 | UGCAUUAU |
| ENSG00000134247 | UGCCCUUG |
| ENSG00000134247 | UGCUCAC  |
| ENSG00000134247 | UGGCUGC  |
| ENSG00000134247 | UGGUACC  |
| ENSG00000134247 | UUAGAGA  |
| ENSG00000134250 | AAAAAUC  |
| ENSG00000134250 | AAGGUGC  |
| ENSG00000134250 | AGCACCA  |
| ENSG00000134250 | CAGCAGA  |
| ENSG00000134250 | CAGCAGG  |
| ENSG00000134250 | CCUUCAU  |
| ENSG00000134250 | CUGGGCA  |
| ENSG00000134250 | CUUUGGU  |
| ENSG00000134250 | GCAGCAU  |
| ENSG00000134250 | GGCAGUG  |
| ENSG00000134250 | UGUCUGG  |
| ENSG00000134250 | UUGUUCG  |
| ENSG00000134253 | GAGAAAU  |
| ENSG00000134258 | CUGGCUC  |
| ENSG00000134259 | AGGGAGG  |
| ENSG00000134259 | GAGGUAG  |
| ENSG00000134278 | AAAGUUU  |
| ENSG00000134278 | AACUACU  |
| ENSG00000134278 | AAGGCAC  |
| ENSG00000134278 | AGUGCAA  |
| ENSG00000134278 | AUAUUUAU |
| ENSG00000134278 | GAGGUAG  |
| ENSG00000134278 | GAGGUAU  |
| ENSG00000134278 | GCAGGUU  |
| ENSG00000134278 | GUGAAUG  |
| ENSG00000134278 | GUGCAA   |
| ENSG00000134278 | GUUCAUG  |
| ENSG00000134278 | UUCAAGC  |
| ENSG00000134278 | UUGGCAC  |
| ENSG00000134283 | AACACUG  |
| ENSG00000134283 | CUGUUGA  |
| ENSG00000134283 | GAGGCAG  |
| ENSG00000134287 | ACAUUCA  |
| ENSG00000134287 | ACUGCAG  |
| ENSG00000134287 | CACAGUG  |
| ENSG00000134287 | CAGUUAC  |
| ENSG00000134287 | CCUGCUG  |
| ENSG00000134287 | CUCAGGG  |
| ENSG00000134287 | GCAUCCC  |
| ENSG00000134287 | GGGGUCC  |
| ENSG00000134287 | UGGCCAC  |
| ENSG00000134294 | AAGAACC  |
| ENSG00000134294 | ACAUUCA  |
| ENSG00000134294 | AGUGC UU |
| ENSG00000134294 | AGUGGUU  |
| ENSG00000134294 | AUGGAUU  |
| ENSG00000134294 | CCAGUGC  |
| ENSG00000134294 | GAGAUGA  |
| ENSG00000134294 | GGAAGAC  |
| ENSG00000134294 | GUAACA   |
| ENSG00000134294 | UCUGGAA  |
| ENSG00000134308 | AAAAGUA  |
| ENSG00000134308 | AAAGCUG  |
| ENSG00000134308 | AAAGUAC  |
| ENSG00000134308 | AACUGGU  |
| ENSG00000134308 | AAUACUG  |

|                 |          |
|-----------------|----------|
| ENSG00000134308 | AGCAGCA  |
| ENSG00000134308 | GUAUUCU  |
| ENSG00000134308 | UAUAAAAG |
| ENSG00000134308 | UGAAAUG  |
| ENSG00000134317 | ACCCGUA  |
| ENSG00000134317 | CCCUGAG  |
| ENSG00000134317 | GGUUUAC  |
| ENSG00000134317 | GUAAACA  |
| ENSG00000134317 | UCCUGU   |
| ENSG00000134317 | UGUAUGU  |
| ENSG00000134318 | AAGGCAC  |
| ENSG00000134318 | AGUGCAA  |
| ENSG00000134321 | UGACCUA  |
| ENSG00000134323 | AAAGUAC  |
| ENSG00000134323 | AAAGUUU  |
| ENSG00000134323 | AAUACUG  |
| ENSG00000134323 | AUAAAGU  |
| ENSG00000134323 | AUACAAG  |
| ENSG00000134323 | CUCAAAC  |
| ENSG00000134323 | UAAUAUC  |
| ENSG00000134323 | UACAAAG  |
| ENSG00000134323 | UACAGUU  |
| ENSG00000134323 | UCAUACA  |
| ENSG00000134323 | UCCAGUU  |
| ENSG00000134323 | UGCAAAG  |
| ENSG00000134323 | UGUAUAA  |
| ENSG00000134323 | UUCAAAU  |
| ENSG00000134324 | AAAAGUA  |
| ENSG00000134324 | AAAGUAA  |
| ENSG00000134324 | AAGGCAC  |
| ENSG00000134324 | AGCAAAA  |
| ENSG00000134324 | AUCCUUG  |
| ENSG00000134324 | GAGGCUG  |
| ENSG00000134324 | GGAUUUU  |
| ENSG00000134324 | UCACAGG  |
| ENSG00000134326 | AAGUGCA  |
| ENSG00000134333 | GGCAGUG  |
| ENSG00000134333 | UUAUGCA  |
| ENSG00000134369 | AAGGCAC  |
| ENSG00000134369 | AAGGUGC  |
| ENSG00000134369 | AAGUAGC  |
| ENSG00000134369 | ACCCUGU  |
| ENSG00000134369 | ACUGGCU  |
| ENSG00000134369 | AGCAGCA  |
| ENSG00000134369 | AGCAGCG  |
| ENSG00000134369 | AGCAGCU  |
| ENSG00000134369 | AGCCAGU  |
| ENSG00000134369 | AGUAACA  |
| ENSG00000134369 | AUCCUUG  |
| ENSG00000134369 | CAGCAGA  |
| ENSG00000134369 | CAGGCUC  |
| ENSG00000134369 | CCAGGAG  |
| ENSG00000134369 | CCAGUGC  |
| ENSG00000134369 | CUCAAAC  |
| ENSG00000134369 | CUCUGGG  |
| ENSG00000134369 | CUGGGCA  |
| ENSG00000134369 | CUUCACC  |
| ENSG00000134369 | CUUCUCU  |
| ENSG00000134369 | GAAGGUC  |
| ENSG00000134369 | GACCUGG  |
| ENSG00000134369 | GAGACCU  |
| ENSG00000134369 | GAGGCAG  |
| ENSG00000134369 | GAGGGGC  |
| ENSG00000134369 | GAGUUGG  |

|                 |         |
|-----------------|---------|
| ENSG00000134369 | GAUUGUA |
| ENSG00000134369 | GAUUGUC |
| ENSG00000134369 | GCAACUU |
| ENSG00000134369 | GCACCAU |
| ENSG00000134369 | GCAGAAG |
| ENSG00000134369 | GCAGCAU |
| ENSG00000134369 | GGAUGAG |
| ENSG00000134369 | GGGUUUA |
| ENSG00000134369 | GGUUACC |
| ENSG00000134369 | GUAAACA |
| ENSG00000134369 | UCAAGUA |
| ENSG00000134369 | UCCAGAG |
| ENSG00000134369 | UCCCACC |
| ENSG00000134369 | UCCCUGU |
| ENSG00000134369 | UCUCAAG |
| ENSG00000134369 | UGCAUAG |
| ENSG00000134369 | UGCAUUA |
| ENSG00000134369 | UUCUGCA |
| ENSG00000134371 | CCUUCUU |
| ENSG00000134375 | UUUCAAC |
| ENSG00000134438 | CAGGAAC |
| ENSG00000134440 | AUGCAUU |
| ENSG00000134443 | CAGCAA  |
| ENSG00000134444 | AAGGCAC |
| ENSG00000134444 | ACAUUAC |
| ENSG00000134444 | CUUUGGU |
| ENSG00000134444 | GCUGGUG |
| ENSG00000134444 | GUGCAA  |
| ENSG00000134444 | UAAUACA |
| ENSG00000134452 | AAAAGUA |
| ENSG00000134452 | ACUGGCU |
| ENSG00000134452 | GAGAAAU |
| ENSG00000134453 | AUAUUAU |
| ENSG00000134453 | UCUCCAA |
| ENSG00000134489 | GAAAACA |
| ENSG00000134504 | AUGGCUU |
| ENSG00000134508 | AAAGUGC |
| ENSG00000134508 | AAGUGCA |
| ENSG00000134508 | ACAUAGA |
| ENSG00000134508 | CACAGUG |
| ENSG00000134508 | CAGUAGU |
| ENSG00000134508 | CCAGUAC |
| ENSG00000134508 | UCCAGUU |
| ENSG00000134508 | UGUGCUU |
| ENSG00000134508 | UUGGCAC |
| ENSG00000134516 | GAGAUGA |
| ENSG00000134516 | GUCAGUU |
| ENSG00000134531 | AAUACUG |
| ENSG00000134531 | ACAGUAU |
| ENSG00000134531 | ACUAGAU |
| ENSG00000134531 | AGCACCA |
| ENSG00000134531 | AUCCCUU |
| ENSG00000134531 | GGCAAGA |
| ENSG00000134531 | UAUAAAG |
| ENSG00000134531 | UCCCUCU |
| ENSG00000134532 | AACAAAC |
| ENSG00000134532 | AAGUGCA |
| ENSG00000134532 | ACCCAUU |
| ENSG00000134532 | ACUGGCC |
| ENSG00000134532 | ACUGGCU |
| ENSG00000134532 | ACUGUGU |
| ENSG00000134532 | AGCAGCA |
| ENSG00000134532 | AGCAGCG |
| ENSG00000134532 | AGUAACA |

|                 |         |
|-----------------|---------|
| ENSG00000134532 | AGUGCAA |
| ENSG00000134532 | AGUGCUU |
| ENSG00000134532 | CACAAUG |
| ENSG00000134532 | CACCAGC |
| ENSG00000134532 | CAGGUGA |
| ENSG00000134532 | CAGUGCA |
| ENSG00000134532 | CUACAGU |
| ENSG00000134532 | GGCAUUG |
| ENSG00000134532 | GGGUAAG |
| ENSG00000134532 | GUAACAG |
| ENSG00000134532 | GUGCAA  |
| ENSG00000134532 | UAAGACG |
| ENSG00000134532 | UACAGUU |
| ENSG00000134532 | UCACAAG |
| ENSG00000134532 | UCUAGAG |
| ENSG00000134532 | UGAAGUG |
| ENSG00000134532 | UGAGAAU |
| ENSG00000134532 | UGUGCUU |
| ENSG00000134532 | UUGGCAA |
| ENSG00000134533 | AUGUAAU |
| ENSG00000134533 | UACAAAG |
| ENSG00000134533 | UGCAUUG |
| ENSG00000134551 | CUCCAGC |
| ENSG00000134569 | AAAUUUC |
| ENSG00000134569 | AAGUGCA |
| ENSG00000134569 | AAUCUCU |
| ENSG00000134569 | ACAUUCA |
| ENSG00000134569 | ACUGGCC |
| ENSG00000134569 | AGGACAC |
| ENSG00000134569 | AGUGCAA |
| ENSG00000134569 | AUAUUAU |
| ENSG00000134569 | AUCAUAC |
| ENSG00000134569 | CAGUGCA |
| ENSG00000134569 | CCAGUGC |
| ENSG00000134569 | CCAGUGU |
| ENSG00000134569 | CCCUGAG |
| ENSG00000134569 | CCUUCAU |
| ENSG00000134569 | CUCCAGC |
| ENSG00000134569 | GAGGCUG |
| ENSG00000134569 | UGCCAGC |
| ENSG00000134569 | UGGAGAU |
| ENSG00000134569 | UUCUUGU |
| ENSG00000134575 | AGUGGUU |
| ENSG00000134575 | CCCACCU |
| ENSG00000134575 | GGGGAGC |
| ENSG00000134590 | AAGGCAC |
| ENSG00000134594 | AUACAAG |
| ENSG00000134595 | CACACCU |
| ENSG00000134595 | UAUAAAG |
| ENSG00000134644 | AAGUGUG |
| ENSG00000134644 | AAUUAUU |
| ENSG00000134644 | ACAAGGU |
| ENSG00000134644 | AGUAGAC |
| ENSG00000134644 | AGUGUGC |
| ENSG00000134644 | CUACAAA |
| ENSG00000134644 | CUAUACA |
| ENSG00000134644 | UGUGCUU |
| ENSG00000134684 | GGUAGAC |
| ENSG00000134684 | UCCACA  |
| ENSG00000134684 | UCCUUU  |
| ENSG00000134684 | UUCAAAU |
| ENSG00000134686 | AAGGCGC |
| ENSG00000134686 | ACCUGGA |
| ENSG00000134686 | AGCCAGU |

|                 |          |
|-----------------|----------|
| ENSG00000134686 | CAAAGCA  |
| ENSG00000134686 | CACAGUG  |
| ENSG00000134686 | CAGCAGG  |
| ENSG00000134686 | CAGUCCA  |
| ENSG00000134686 | CCAGUGC  |
| ENSG00000134686 | CCCUGAG  |
| ENSG00000134686 | CUACAAA  |
| ENSG00000134686 | CUUCUCU  |
| ENSG00000134686 | GAGCCCU  |
| ENSG00000134686 | GCCUGGG  |
| ENSG00000134686 | GGAGUCC  |
| ENSG00000134686 | GGGGAGC  |
| ENSG00000134686 | UAAUGCU  |
| ENSG00000134686 | UCACACA  |
| ENSG00000134686 | UCACAGU  |
| ENSG00000134686 | UCAUUUG  |
| ENSG00000134690 | GAGGUAG  |
| ENSG00000134690 | UUGGUCC  |
| ENSG00000134698 | ACAUUCA  |
| ENSG00000134698 | AGCAGCA  |
| ENSG00000134698 | AGGACAC  |
| ENSG00000134698 | GAGGUAG  |
| ENSG00000134698 | GAGGUAU  |
| ENSG00000134698 | GCUAGCA  |
| ENSG00000134698 | UACAGUU  |
| ENSG00000134709 | AAGUCUU  |
| ENSG00000134709 | AGGUAGU  |
| ENSG00000134709 | AGUAACA  |
| ENSG00000134709 | CACAGGG  |
| ENSG00000134709 | GAGGUAG  |
| ENSG00000134709 | UAAUGCU  |
| ENSG00000134717 | AAAACUG  |
| ENSG00000134717 | AAGUGCA  |
| ENSG00000134717 | AAUACUG  |
| ENSG00000134717 | AUAUAAC  |
| ENSG00000134717 | CUCAAAC  |
| ENSG00000134717 | GAGGUAG  |
| ENSG00000134717 | UGCCAGC  |
| ENSG00000134744 | AAAGUUU  |
| ENSG00000134744 | UAUAAAG  |
| ENSG00000134748 | AGCAGCA  |
| ENSG00000134748 | GUGAAUG  |
| ENSG00000134748 | UGUUGAA  |
| ENSG00000134755 | AGCACCA  |
| ENSG00000134757 | UCCCAUA  |
| ENSG00000134758 | AACUACU  |
| ENSG00000134758 | AAUCUCA  |
| ENSG00000134758 | ACUGUUU  |
| ENSG00000134758 | AGCACCA  |
| ENSG00000134758 | AGCAGCG  |
| ENSG00000134758 | AGCAGCU  |
| ENSG00000134758 | AUAUUUAU |
| ENSG00000134758 | AUGGCAC  |
| ENSG00000134758 | CUGGCUC  |
| ENSG00000134758 | GCACCAU  |
| ENSG00000134758 | GGAAUGU  |
| ENSG00000134758 | GUCAACA  |
| ENSG00000134758 | UAAUAUC  |
| ENSG00000134758 | UCAAGUA  |
| ENSG00000134762 | AAGGUGC  |
| ENSG00000134762 | ACUGCAU  |
| ENSG00000134762 | UAUAAAG  |
| ENSG00000134762 | UGACUGU  |
| ENSG00000134765 | CACACCU  |



|                 |          |
|-----------------|----------|
| ENSG00000134769 | AAAGCUG  |
| ENSG00000134769 | ACUAGAU  |
| ENSG00000134769 | AUGGCAC  |
| ENSG00000134769 | UGCAUUAU |
| ENSG00000134775 | UGUGCUU  |
| ENSG00000134780 | ACAUUAC  |
| ENSG00000134780 | AGCCUGC  |
| ENSG00000134780 | AUACAAG  |
| ENSG00000134780 | AUAUUAU  |
| ENSG00000134780 | AUGGCAC  |
| ENSG00000134780 | CCCUGAG  |
| ENSG00000134780 | CUGCAGC  |
| ENSG00000134780 | GAGGUAG  |
| ENSG00000134780 | GGCACGG  |
| ENSG00000134780 | GGCUCAG  |
| ENSG00000134780 | GGCUCUG  |
| ENSG00000134780 | GGCUCG   |
| ENSG00000134780 | GUAAACA  |
| ENSG00000134780 | GUCUCUG  |
| ENSG00000134780 | UCCAGUU  |
| ENSG00000134780 | UGCAUAG  |
| ENSG00000134780 | UGCAUUAU |
| ENSG00000134780 | UGGCUGC  |
| ENSG00000134780 | UGGGGGA  |
| ENSG00000134780 | UGUGCUU  |
| ENSG00000134817 | ACCACAG  |
| ENSG00000134817 | CACAGUG  |
| ENSG00000134817 | CUGGGCA  |
| ENSG00000134817 | GAGCCCC  |
| ENSG00000134817 | GUCUCUG  |
| ENSG00000134817 | GUCUUGC  |
| ENSG00000134825 | UACAAAG  |
| ENSG00000134851 | CUACAAA  |
| ENSG00000134852 | AAAAAUC  |
| ENSG00000134852 | AAAACUG  |
| ENSG00000134852 | AAACUGU  |
| ENSG00000134852 | AAAGUGC  |
| ENSG00000134852 | AACCUGG  |
| ENSG00000134852 | AACCUGU  |
| ENSG00000134852 | AAGGCAC  |
| ENSG00000134852 | AGUGCAA  |
| ENSG00000134852 | AUACCUC  |
| ENSG00000134852 | AUCAUAC  |
| ENSG00000134852 | CAGUGCA  |
| ENSG00000134852 | CUGACUC  |
| ENSG00000134852 | CUGGACU  |
| ENSG00000134852 | GGCAGUG  |
| ENSG00000134852 | GUAACAG  |
| ENSG00000134852 | GUGACAG  |
| ENSG00000134852 | UCUUGAG  |
| ENSG00000134852 | UGACAUC  |
| ENSG00000134852 | UGAGAAU  |
| ENSG00000134852 | UGGACUG  |
| ENSG00000134852 | UGUUGAA  |
| ENSG00000134852 | UUCAAAU  |
| ENSG00000134852 | UUGGCAC  |
| ENSG00000134853 | AAGUGCA  |
| ENSG00000134853 | AGCAGCU  |
| ENSG00000134853 | AGGUAGU  |
| ENSG00000134853 | AGUGCAA  |
| ENSG00000134853 | AGUGGUU  |
| ENSG00000134853 | AUGUGCC  |
| ENSG00000134853 | CAGUAGU  |
| ENSG00000134853 | CUCUUCC  |

|                 |         |
|-----------------|---------|
| ENSG00000134853 | CUUCACC |
| ENSG00000134853 | GAAAACA |
| ENSG00000134853 | GACUUC  |
| ENSG00000134853 | GAGAUGA |
| ENSG00000134853 | GAUUGUA |
| ENSG00000134853 | GGCUCAG |
| ENSG00000134853 | GUAUUCU |
| ENSG00000134853 | GUGCUUG |
| ENSG00000134853 | GUUAAUG |
| ENSG00000134853 | UAUUGCU |
| ENSG00000134853 | UCAACAG |
| ENSG00000134853 | UCAAGUA |
| ENSG00000134853 | UCACAAG |
| ENSG00000134853 | UCACAGU |
| ENSG00000134853 | UCAUUCG |
| ENSG00000134853 | UCCCUCU |
| ENSG00000134853 | UGAAAUG |
| ENSG00000134853 | UGUAUAA |
| ENSG00000134853 | UUCAAGC |
| ENSG00000134853 | UUGGCAC |
| ENSG00000134871 | CUUUGGU |
| ENSG00000134871 | GAGGUAG |
| ENSG00000134871 | GAGGUAU |
| ENSG00000134873 | AAAAAUC |
| ENSG00000134873 | AGCCCUU |
| ENSG00000134873 | GUUAAUG |
| ENSG00000134874 | AAGGCAC |
| ENSG00000134874 | GAGGUAG |
| ENSG00000134874 | UACAGUU |
| ENSG00000134874 | UUGAGGC |
| ENSG00000134882 | AAAAACC |
| ENSG00000134882 | AGCAAAA |
| ENSG00000134884 | AAUACUG |
| ENSG00000134884 | ACCAGCA |
| ENSG00000134884 | UAAGACG |
| ENSG00000134884 | UCAACAG |
| ENSG00000134884 | UGAAGCU |
| ENSG00000134897 | CUACAAA |
| ENSG00000134897 | GAGAACU |
| ENSG00000134897 | GUGCUUG |
| ENSG00000134897 | UCCAGUU |
| ENSG00000134897 | UGUGCUU |
| ENSG00000134899 | AUUCAUU |
| ENSG00000134917 | CUGCAGG |
| ENSG00000134917 | GAGGUAU |
| ENSG00000134917 | UGCAUAG |
| ENSG00000134917 | UGCAUUA |
| ENSG00000134917 | UUUGCAA |
| ENSG00000134940 | GCCUGAU |
| ENSG00000134954 | AAGGCAC |
| ENSG00000134954 | ACAGUAC |
| ENSG00000134954 | ACUGGCC |
| ENSG00000134954 | ACUGGCU |
| ENSG00000134954 | AGCAAAA |
| ENSG00000134954 | AGCAGCU |
| ENSG00000134954 | AUGUGCC |
| ENSG00000134954 | CCAGUGC |
| ENSG00000134954 | CCCUGAG |
| ENSG00000134954 | CUACAGU |
| ENSG00000134954 | CUCCAC  |
| ENSG00000134954 | CUUUGGU |
| ENSG00000134954 | GAGACCU |
| ENSG00000134954 | GGAGGCA |
| ENSG00000134954 | GGGUCC  |

|                 |          |
|-----------------|----------|
| ENSG00000134954 | GUGCCAC  |
| ENSG00000134954 | UAAGACU  |
| ENSG00000134954 | UCCAGUU  |
| ENSG00000134954 | UCUGGAG  |
| ENSG00000134954 | UGCAUUG  |
| ENSG00000134954 | UGCCAGC  |
| ENSG00000134954 | UGUAUAA  |
| ENSG00000134954 | UUUGCAA  |
| ENSG00000134954 | UUUGCAC  |
| ENSG00000134955 | CUCAGGG  |
| ENSG00000134955 | UGAGGAC  |
| ENSG00000134970 | AAUGUUG  |
| ENSG00000134970 | AUAUUAU  |
| ENSG00000134982 | AAAGAGC  |
| ENSG00000134982 | AAAGUAU  |
| ENSG00000134982 | AAGACAU  |
| ENSG00000134982 | ACUGUGU  |
| ENSG00000134982 | AGUAACA  |
| ENSG00000134982 | AUACAAG  |
| ENSG00000134982 | AUGCACC  |
| ENSG00000134982 | CAAAGCA  |
| ENSG00000134982 | CAGUUAC  |
| ENSG00000134982 | CCCUGAG  |
| ENSG00000134982 | CUCCCAA  |
| ENSG00000134982 | GAAACAU  |
| ENSG00000134982 | GGGUAAG  |
| ENSG00000134982 | GUGAAUG  |
| ENSG00000134982 | GUUAAUG  |
| ENSG00000134982 | UAAGACG  |
| ENSG00000134982 | UAAGACU  |
| ENSG00000134982 | UCACAAG  |
| ENSG00000134982 | UCACAGG  |
| ENSG00000134982 | UCACAGU  |
| ENSG00000134982 | UCAUUCG  |
| ENSG00000134982 | UCCAGAG  |
| ENSG00000134982 | UCUCACC  |
| ENSG00000134982 | UGAAAUG  |
| ENSG00000134982 | UGCAUUA  |
| ENSG00000134982 | UUUGCAA  |
| ENSG00000134982 | UUUGCAC  |
| ENSG00000134986 | AAAACUG  |
| ENSG00000134986 | AAGACAU  |
| ENSG00000134986 | AAGGUGC  |
| ENSG00000134986 | AAUACUG  |
| ENSG00000134986 | AAUUAAU  |
| ENSG00000134986 | ACAUCAC  |
| ENSG00000134986 | ACCACAG  |
| ENSG00000134986 | CCCACCU  |
| ENSG00000134986 | CCUUCUU  |
| ENSG00000134986 | GCACCAU  |
| ENSG00000134986 | GCAGCAU  |
| ENSG00000134986 | GGCAGCG  |
| ENSG00000134986 | GGCUCAG  |
| ENSG00000134986 | GUAAAACA |
| ENSG00000134986 | UACAAAG  |
| ENSG00000134986 | UAUAUGA  |
| ENSG00000134986 | UCACAGG  |
| ENSG00000134996 | GGAAUGU  |
| ENSG00000135018 | AAGUCAC  |
| ENSG00000135045 | AAAGUAU  |
| ENSG00000135045 | AAUCUCU  |
| ENSG00000135045 | UAUAAAAG |
| ENSG00000135045 | UGCAUUA  |
| ENSG00000135048 | AAAGCUG  |

|                 |          |
|-----------------|----------|
| ENSG00000135048 | AAAUGGU  |
| ENSG00000135048 | AACAGUC  |
| ENSG00000135048 | AGCCCUU  |
| ENSG00000135048 | AGUGCCU  |
| ENSG00000135048 | GAGGUAU  |
| ENSG00000135048 | GUCAUUG  |
| ENSG00000135048 | UUGAGGC  |
| ENSG00000135052 | ACAUUAC  |
| ENSG00000135052 | CACAGUG  |
| ENSG00000135052 | UCACAGG  |
| ENSG00000135070 | UCCUGAG  |
| ENSG00000135074 | AAGGCAC  |
| ENSG00000135074 | ACAGUAC  |
| ENSG00000135074 | AGCACCA  |
| ENSG00000135074 | AUGGCUU  |
| ENSG00000135074 | AUUCAUU  |
| ENSG00000135074 | CAAAGCA  |
| ENSG00000135074 | CACAGUG  |
| ENSG00000135074 | CUCCAC   |
| ENSG00000135074 | CUCUGGG  |
| ENSG00000135074 | CUGCUC   |
| ENSG00000135074 | GCACCAU  |
| ENSG00000135074 | GCCUGU   |
| ENSG00000135074 | GCUGUCU  |
| ENSG00000135074 | GGCCUG   |
| ENSG00000135074 | GGCUCAG  |
| ENSG00000135074 | UCACAGU  |
| ENSG00000135074 | UCAUUUG  |
| ENSG00000135074 | UCCAGUU  |
| ENSG00000135074 | UGCAUUAU |
| ENSG00000135074 | UUGGCAA  |
| ENSG00000135074 | UUGGCAC  |
| ENSG00000135074 | UUUGCAC  |
| ENSG00000135083 | AAAUCCC  |
| ENSG00000135083 | AAUACUG  |
| ENSG00000135083 | ACUGGCC  |
| ENSG00000135083 | AGCAGCA  |
| ENSG00000135083 | CAUAUUG  |
| ENSG00000135083 | CCCUGAG  |
| ENSG00000135083 | GAGGUAG  |
| ENSG00000135083 | GGCAGUG  |
| ENSG00000135083 | GUGAGGU  |
| ENSG00000135083 | UCCUGAG  |
| ENSG00000135083 | UUCAAGC  |
| ENSG00000135083 | UUUCAAC  |
| ENSG00000135090 | AAAGUAA  |
| ENSG00000135090 | AGCAGCU  |
| ENSG00000135090 | CAGCAGA  |
| ENSG00000135090 | CUCUUCC  |
| ENSG00000135090 | GGAAUGU  |
| ENSG00000135090 | GGCUGCG  |
| ENSG00000135090 | UACAAAG  |
| ENSG00000135090 | UCCUGAG  |
| ENSG00000135090 | UCUCCAA  |
| ENSG00000135090 | UGUGCUU  |
| ENSG00000135093 | AACAAAC  |
| ENSG00000135093 | AGCAAAA  |
| ENSG00000135093 | CUACAAA  |
| ENSG00000135093 | CUGGCUC  |
| ENSG00000135093 | UUCUUGU  |
| ENSG00000135094 | UGGAUAA  |
| ENSG00000135097 | AACAAAC  |
| ENSG00000135097 | AACGGAA  |
| ENSG00000135097 | AACUCUA  |

|                 |          |
|-----------------|----------|
| ENSG00000135097 | ACAGUAC  |
| ENSG00000135097 | ACAGUAU  |
| ENSG00000135097 | ACAUUCA  |
| ENSG00000135097 | ACUCAGC  |
| ENSG00000135097 | AGAUGUG  |
| ENSG00000135097 | AGGGAGG  |
| ENSG00000135097 | AGUAACA  |
| ENSG00000135097 | CAGCUGG  |
| ENSG00000135097 | CCCCUGG  |
| ENSG00000135097 | CCCUGAG  |
| ENSG00000135097 | CGGCCUG  |
| ENSG00000135097 | CUCACAC  |
| ENSG00000135097 | CUGCAGG  |
| ENSG00000135097 | CUGGAAA  |
| ENSG00000135097 | CUGGCUC  |
| ENSG00000135097 | CUUACAG  |
| ENSG00000135097 | CUUCUCU  |
| ENSG00000135097 | GCUGGUG  |
| ENSG00000135097 | GGCUGCG  |
| ENSG00000135097 | GGGUCC   |
| ENSG00000135097 | UACAGUU  |
| ENSG00000135097 | UCACAUU  |
| ENSG00000135097 | UCUCCAA  |
| ENSG00000135097 | UGCAGCU  |
| ENSG00000135097 | UGGAGAU  |
| ENSG00000135097 | UUGGAGG  |
| ENSG00000135097 | UUGUGUC  |
| ENSG00000135097 | UUUCAAC  |
| ENSG00000135100 | AAAAGUA  |
| ENSG00000135100 | CUGCAGG  |
| ENSG00000135108 | AAACUGU  |
| ENSG00000135108 | ACAGGUG  |
| ENSG00000135108 | ACCACAG  |
| ENSG00000135108 | AGCAUUC  |
| ENSG00000135108 | AGUGCCU  |
| ENSG00000135108 | AUUCAUU  |
| ENSG00000135108 | CACAGUG  |
| ENSG00000135108 | CACCACC  |
| ENSG00000135108 | CAGCAA   |
| ENSG00000135108 | CAGGUGA  |
| ENSG00000135108 | GAGACCU  |
| ENSG00000135108 | GGAGGCA  |
| ENSG00000135108 | GGCAUUG  |
| ENSG00000135108 | GUAGUGU  |
| ENSG00000135108 | UAUAAAAG |
| ENSG00000135108 | UCACCAC  |
| ENSG00000135108 | UGCAGCU  |
| ENSG00000135108 | UGUCUUU  |
| ENSG00000135111 | AAAAAUC  |
| ENSG00000135111 | AAAGUGC  |
| ENSG00000135111 | AAAUUUC  |
| ENSG00000135111 | AAGUGCA  |
| ENSG00000135111 | ACAUCAC  |
| ENSG00000135111 | AUUGCAC  |
| ENSG00000135111 | CAAAGUG  |
| ENSG00000135111 | CAUAUUG  |
| ENSG00000135111 | CCUUCAU  |
| ENSG00000135111 | UAAUAGU  |
| ENSG00000135111 | UAUUGCU  |
| ENSG00000135111 | UGAAAUG  |
| ENSG00000135111 | UGCAUAG  |
| ENSG00000135116 | AGGACAC  |
| ENSG00000135116 | CACAGGG  |
| ENSG00000135116 | UCUCCAA  |

|                 |          |
|-----------------|----------|
| ENSG00000135116 | UGUAUGU  |
| ENSG00000135119 | AGGCAGG  |
| ENSG00000135119 | AGUAACA  |
| ENSG00000135119 | GAUUGUA  |
| ENSG00000135119 | GCCUGU   |
| ENSG00000135119 | GUCUUGC  |
| ENSG00000135119 | UGAAAGG  |
| ENSG00000135119 | UGCCUG   |
| ENSG00000135124 | AAGUGCU  |
| ENSG00000135124 | AGUGCUU  |
| ENSG00000135127 | AAAAAUC  |
| ENSG00000135127 | ACAUUCA  |
| ENSG00000135127 | AGCAGCA  |
| ENSG00000135127 | AGCAGCU  |
| ENSG00000135127 | AGGCAGG  |
| ENSG00000135127 | AGGGAGG  |
| ENSG00000135127 | AUUCAUU  |
| ENSG00000135127 | CCUGCUG  |
| ENSG00000135127 | GUGCUUG  |
| ENSG00000135127 | UAUAAAG  |
| ENSG00000135127 | UCAUUUG  |
| ENSG00000135127 | UGUGCUU  |
| ENSG00000135127 | UUCAAAU  |
| ENSG00000135127 | UUCUAAU  |
| ENSG00000135127 | UUUCAAC  |
| ENSG00000135144 | AAAGAGC  |
| ENSG00000135144 | CACAGUG  |
| ENSG00000135144 | CCCCUGG  |
| ENSG00000135144 | CUGGGCA  |
| ENSG00000135144 | GAGUUGA  |
| ENSG00000135144 | GAGUUGG  |
| ENSG00000135144 | GCCUGGA  |
| ENSG00000135144 | GCUGGUG  |
| ENSG00000135144 | GGAGGAG  |
| ENSG00000135144 | UCCCUUU  |
| ENSG00000135144 | UCUCCAA  |
| ENSG00000135148 | AAGUGCU  |
| ENSG00000135148 | ACAAGGU  |
| ENSG00000135148 | AGCACCA  |
| ENSG00000135148 | AGUGCUG  |
| ENSG00000135164 | AACUACU  |
| ENSG00000135164 | AAGACAU  |
| ENSG00000135164 | ACAAUUAU |
| ENSG00000135164 | CUCCAC   |
| ENSG00000135164 | GUAGUGU  |
| ENSG00000135164 | UGCCAGC  |
| ENSG00000135213 | AAAGAGG  |
| ENSG00000135213 | AAAUUUC  |
| ENSG00000135213 | AACAGUC  |
| ENSG00000135213 | AAUCUCA  |
| ENSG00000135213 | AGCUUAU  |
| ENSG00000135213 | CACAGUG  |
| ENSG00000135213 | CUCCAGC  |
| ENSG00000135213 | CUCCCAA  |
| ENSG00000135213 | CUCCCAC  |
| ENSG00000135213 | UCAAGUA  |
| ENSG00000135213 | UCACAGU  |
| ENSG00000135218 | UUCAAAU  |
| ENSG00000135222 | UCCAGUU  |
| ENSG00000135248 | GAGAUGA  |
| ENSG00000135248 | UUCAAGC  |
| ENSG00000135250 | AAAGAGG  |
| ENSG00000135250 | AACUACU  |
| ENSG00000135250 | ACAGUAC  |

|                 |         |
|-----------------|---------|
| ENSG00000135250 | AUUGCAC |
| ENSG00000135250 | CAGUGCA |
| ENSG00000135250 | GACAACU |
| ENSG00000135250 | UAAUACA |
| ENSG00000135269 | ACAGUAC |
| ENSG00000135269 | ACAGUAU |
| ENSG00000135269 | CUUUGGU |
| ENSG00000135272 | AGAUAAA |
| ENSG00000135272 | AUAAUAC |
| ENSG00000135272 | CUCCAGC |
| ENSG00000135272 | UAAUACA |
| ENSG00000135272 | UGAGAAU |
| ENSG00000135298 | AAAAACC |
| ENSG00000135298 | AAAAGUA |
| ENSG00000135298 | AAAGUAC |
| ENSG00000135298 | AAAGUAU |
| ENSG00000135298 | AACAAAC |
| ENSG00000135298 | AACAUUC |
| ENSG00000135298 | AUUGCAC |
| ENSG00000135298 | CAGCAGA |
| ENSG00000135298 | CAGGCUC |
| ENSG00000135298 | CUGCAGC |
| ENSG00000135298 | GCAGCAU |
| ENSG00000135298 | GUCAGUU |
| ENSG00000135298 | GUGCUUG |
| ENSG00000135298 | UACAAAG |
| ENSG00000135298 | UAUUACC |
| ENSG00000135298 | UAUUGCU |
| ENSG00000135298 | UCAUUUG |
| ENSG00000135298 | UGCAUUG |
| ENSG00000135298 | UUGGCAA |
| ENSG00000135299 | CAGCAGG |
| ENSG00000135299 | CUCUUCC |
| ENSG00000135299 | UACAGUU |
| ENSG00000135316 | AAAUGGU |
| ENSG00000135316 | AAGUGUG |
| ENSG00000135316 | AAGUUGU |
| ENSG00000135316 | GUGUGGC |
| ENSG00000135316 | UGCCAGC |
| ENSG00000135317 | AAAAGUA |
| ENSG00000135333 | ACAGUAU |
| ENSG00000135333 | AGCAGCG |
| ENSG00000135333 | AGCAGCU |
| ENSG00000135333 | AGUGCAA |
| ENSG00000135333 | AUGUGGG |
| ENSG00000135333 | CCAGUGU |
| ENSG00000135333 | GAAAACA |
| ENSG00000135333 | GAGAAAU |
| ENSG00000135333 | GGGAUCG |
| ENSG00000135333 | UACAGUU |
| ENSG00000135333 | UCAAGUA |
| ENSG00000135333 | UGGACUG |
| ENSG00000135333 | UGGGAUC |
| ENSG00000135333 | UUAGAGA |
| ENSG00000135333 | UUGGCAA |
| ENSG00000135333 | UUGUGAC |
| ENSG00000135334 | AGUGGUU |
| ENSG00000135334 | CAGCAA  |
| ENSG00000135334 | UAAUACA |
| ENSG00000135334 | UGAAAUG |
| ENSG00000135334 | UGACAUC |
| ENSG00000135338 | AACAUUC |
| ENSG00000135338 | AAGUCUU |
| ENSG00000135341 | AACACUG |

|                 |         |
|-----------------|---------|
| ENSG00000135341 | AAGUCAC |
| ENSG00000135341 | AGCAGCA |
| ENSG00000135341 | AGCAGCG |
| ENSG00000135341 | CAGCAAA |
| ENSG00000135341 | UCAAGUA |
| ENSG00000135341 | UCAUUUG |
| ENSG00000135341 | UGUCUUU |
| ENSG00000135363 | ACACACC |
| ENSG00000135363 | ACACACU |
| ENSG00000135363 | AUUGCAC |
| ENSG00000135363 | UGUAUAA |
| ENSG00000135365 | AACACUG |
| ENSG00000135365 | AACGGCU |
| ENSG00000135365 | AACUACU |
| ENSG00000135365 | AAUACUG |
| ENSG00000135365 | AAUUUUA |
| ENSG00000135365 | ACACACC |
| ENSG00000135365 | ACUGUUU |
| ENSG00000135365 | AGCACCA |
| ENSG00000135365 | AGCAGCA |
| ENSG00000135365 | AGCCCUU |
| ENSG00000135365 | AGUAACA |
| ENSG00000135365 | AUAAUAC |
| ENSG00000135365 | AUACAAG |
| ENSG00000135365 | AUGACAC |
| ENSG00000135365 | CACACCU |
| ENSG00000135365 | CACCAGC |
| ENSG00000135365 | CAGCAGG |
| ENSG00000135365 | CCCCCAG |
| ENSG00000135365 | CCCGUCC |
| ENSG00000135365 | CGUGGCC |
| ENSG00000135365 | CUCCAUI |
| ENSG00000135365 | CUCUGGG |
| ENSG00000135365 | CUGCAGC |
| ENSG00000135365 | CUGCAGG |
| ENSG00000135365 | CUGGAAA |
| ENSG00000135365 | CUGGCUC |
| ENSG00000135365 | CUUUGGU |
| ENSG00000135365 | GAGGCUG |
| ENSG00000135365 | GAUCAGA |
| ENSG00000135365 | GCCCUUA |
| ENSG00000135365 | GCUGGUG |
| ENSG00000135365 | GGAAGAC |
| ENSG00000135365 | GGACUGC |
| ENSG00000135365 | GGAGGCA |
| ENSG00000135365 | GUAACAG |
| ENSG00000135365 | GUGCCAC |
| ENSG00000135365 | UAAUAGU |
| ENSG00000135365 | UACAAAG |
| ENSG00000135365 | UAUAAAG |
| ENSG00000135365 | UAUAAUA |
| ENSG00000135365 | UCCAGAG |
| ENSG00000135365 | UCCAGUU |
| ENSG00000135365 | UCUCCAA |
| ENSG00000135365 | UCUGGAA |
| ENSG00000135365 | UGAAGCU |
| ENSG00000135365 | UGCAUAG |
| ENSG00000135365 | UGCAUAI |
| ENSG00000135365 | UGCCCUG |
| ENSG00000135365 | UGUAUAA |
| ENSG00000135365 | UGUCUUU |
| ENSG00000135365 | UUAGGAU |
| ENSG00000135365 | UUCAAGC |
| ENSG00000135365 | UUGAUCA |



|                 |         |
|-----------------|---------|
| ENSG00000135365 | UUGGCAA |
| ENSG00000135365 | UUGGUUC |
| ENSG00000135365 | UUUCAAC |
| ENSG00000135365 | UUUUUGC |
| ENSG00000135373 | AAAACUG |
| ENSG00000135373 | AAAAGUA |
| ENSG00000135373 | AAACUGU |
| ENSG00000135373 | AAUUAUU |
| ENSG00000135373 | ACUGUGU |
| ENSG00000135373 | CACAAUG |
| ENSG00000135373 | GUAGUGU |
| ENSG00000135373 | UAAUGCU |
| ENSG00000135373 | UAUCAGA |
| ENSG00000135373 | UCACAAG |
| ENSG00000135373 | UCACAGG |
| ENSG00000135373 | UCACAGU |
| ENSG00000135373 | UGAAAUG |
| ENSG00000135374 | ACAGUAC |
| ENSG00000135374 | ACAGUAU |
| ENSG00000135374 | AGUGCCU |
| ENSG00000135374 | GAGCUGC |
| ENSG00000135374 | GUCAGUU |
| ENSG00000135374 | UACAGUU |
| ENSG00000135378 | UCAACAG |
| ENSG00000135387 | AAAAAUC |
| ENSG00000135387 | AAAGUAA |
| ENSG00000135387 | AAAGUGC |
| ENSG00000135387 | AACUCUA |
| ENSG00000135387 | AAGUGCA |
| ENSG00000135387 | AAUCCUU |
| ENSG00000135387 | ACCACAG |
| ENSG00000135387 | ACUGGCC |
| ENSG00000135387 | AGAUAAA |
| ENSG00000135387 | AGGACAC |
| ENSG00000135387 | CAAAGCA |
| ENSG00000135387 | CAGCAGG |
| ENSG00000135387 | GGUUGUC |
| ENSG00000135387 | GUCAUUG |
| ENSG00000135387 | GUGCAA  |
| ENSG00000135387 | UACAAAG |
| ENSG00000135387 | UAGUGAG |
| ENSG00000135387 | UAUAAAG |
| ENSG00000135387 | UAUGGUU |
| ENSG00000135387 | UCAACAG |
| ENSG00000135387 | UCCAGUU |
| ENSG00000135387 | UCCUUU  |
| ENSG00000135387 | UGAAAGG |
| ENSG00000135387 | UGAAAUG |
| ENSG00000135392 | AAAAAUC |
| ENSG00000135392 | AACAAAC |
| ENSG00000135392 | AGCCCUU |
| ENSG00000135392 | CCCUGAG |
| ENSG00000135392 | UCCACA  |
| ENSG00000135392 | UGCCAGC |
| ENSG00000135404 | AAAAACC |
| ENSG00000135404 | AACCUUG |
| ENSG00000135407 | UUGGCAC |
| ENSG00000135414 | AGGGUCU |
| ENSG00000135414 | AUUGCAC |
| ENSG00000135423 | ACUGCAG |
| ENSG00000135423 | AGCAGCA |
| ENSG00000135423 | AGCAGCG |
| ENSG00000135423 | AGCAGCU |
| ENSG00000135423 | UCUUGAG |

|                 |         |
|-----------------|---------|
| ENSG00000135424 | CAGCAAA |
| ENSG00000135443 | GAAACAU |
| ENSG00000135443 | GGAAGCC |
| ENSG00000135443 | UCCAUUA |
| ENSG00000135446 | CAGCAAA |
| ENSG00000135446 | UGUAUAA |
| ENSG00000135447 | AAAAACC |
| ENSG00000135447 | AUCACUA |
| ENSG00000135447 | CAGCAGA |
| ENSG00000135447 | CCUUCUU |
| ENSG00000135447 | GCAGAAG |
| ENSG00000135452 | UCUCAAG |
| ENSG00000135454 | ACUGGCU |
| ENSG00000135454 | ACUUGGA |
| ENSG00000135454 | AUGGCUU |
| ENSG00000135454 | CUGCCCC |
| ENSG00000135454 | CUUUGGU |
| ENSG00000135454 | GUGUCAC |
| ENSG00000135454 | UGAAGUG |
| ENSG00000135454 | UUGGCAA |
| ENSG00000135457 | GAAGGAA |
| ENSG00000135469 | AAAAACC |
| ENSG00000135469 | AAUUUUA |
| ENSG00000135469 | UAUAAAG |
| ENSG00000135472 | AAAGUGC |
| ENSG00000135472 | ACUGGCC |
| ENSG00000135472 | ACUUGGA |
| ENSG00000135472 | CAAUUGC |
| ENSG00000135472 | CAGCAAA |
| ENSG00000135472 | CAGCUGG |
| ENSG00000135472 | CCCCCAG |
| ENSG00000135472 | CUCUGGG |
| ENSG00000135472 | UCCUCUG |
| ENSG00000135472 | UUCUGCA |
| ENSG00000135473 | CAAUUCU |
| ENSG00000135473 | GCACCAU |
| ENSG00000135473 | UAUAAAG |
| ENSG00000135482 | AAAAAUC |
| ENSG00000135482 | ACACACC |
| ENSG00000135482 | AGCCCUU |
| ENSG00000135482 | AGUGCUG |
| ENSG00000135482 | CAGACAG |
| ENSG00000135482 | CAGUCUG |
| ENSG00000135482 | CCAGUGC |
| ENSG00000135482 | CUUCUCU |
| ENSG00000135482 | CUUUGGU |
| ENSG00000135482 | GAGCCCU |
| ENSG00000135482 | GGAGUGU |
| ENSG00000135482 | GGCCCUG |
| ENSG00000135482 | UCCUCUC |
| ENSG00000135486 | ACAUUAC |
| ENSG00000135486 | AGCAGCA |
| ENSG00000135486 | AGCAGCG |
| ENSG00000135486 | AUACAAG |
| ENSG00000135486 | CCCUGUU |
| ENSG00000135486 | CCUGCUG |
| ENSG00000135486 | CUCUGGG |
| ENSG00000135486 | CUUCUCU |
| ENSG00000135486 | GAUCAGA |
| ENSG00000135486 | GGCUCUG |
| ENSG00000135486 | GUCACUC |
| ENSG00000135486 | GUGCUUG |
| ENSG00000135486 | UCAACAG |
| ENSG00000135486 | UCACAAG |

|                 |         |
|-----------------|---------|
| ENSG00000135486 | UCAGCGG |
| ENSG00000135486 | UGGCUGC |
| ENSG00000135486 | UGUGCUU |
| ENSG00000135503 | AAAAACC |
| ENSG00000135503 | AAAAGUA |
| ENSG00000135503 | AAAGUGC |
| ENSG00000135503 | AACAAAC |
| ENSG00000135503 | ACCAGCA |
| ENSG00000135503 | ACUCCAG |
| ENSG00000135503 | AGCUGCC |
| ENSG00000135503 | AUGGCUU |
| ENSG00000135503 | CACCACC |
| ENSG00000135503 | CACCAGC |
| ENSG00000135503 | CAGCAGG |
| ENSG00000135503 | CCAGUGC |
| ENSG00000135503 | CCAGUGU |
| ENSG00000135503 | CUCAAAC |
| ENSG00000135503 | CUCCCAA |
| ENSG00000135503 | CUGCUCA |
| ENSG00000135503 | CUGGGCA |
| ENSG00000135503 | CUUUGGU |
| ENSG00000135503 | GAGGUAG |
| ENSG00000135503 | GAUCAGA |
| ENSG00000135503 | GGCUCUG |
| ENSG00000135503 | GUGAAUG |
| ENSG00000135503 | UACAAAG |
| ENSG00000135503 | UACAGUU |
| ENSG00000135503 | UCCAGUU |
| ENSG00000135503 | UCCUCU  |
| ENSG00000135503 | UGAAGUG |
| ENSG00000135503 | UGCAUAG |
| ENSG00000135503 | UGCAUUA |
| ENSG00000135503 | UGCUCAC |
| ENSG00000135503 | UUCCUAG |
| ENSG00000135503 | UUGGUUC |
| ENSG00000135506 | UCCAGUU |
| ENSG00000135517 | AGCAAAA |
| ENSG00000135517 | CAGCAAA |
| ENSG00000135519 | AGCCUGC |
| ENSG00000135519 | CCCUGAG |
| ENSG00000135519 | GCCCUGU |
| ENSG00000135519 | UGCCCUG |
| ENSG00000135525 | AAAAAUC |
| ENSG00000135525 | AAAGUGC |
| ENSG00000135525 | AAGGCAC |
| ENSG00000135525 | AAGUGCA |
| ENSG00000135525 | AAUUUUA |
| ENSG00000135525 | AGUGCAA |
| ENSG00000135525 | CUUUGGU |
| ENSG00000135525 | UUCAAGC |
| ENSG00000135525 | UUGGUUC |
| ENSG00000135535 | AACAAAC |
| ENSG00000135535 | AGCAGCA |
| ENSG00000135535 | CACUGUU |
| ENSG00000135535 | UCCACA  |
| ENSG00000135537 | AAAGUGC |
| ENSG00000135537 | AUGAUGA |
| ENSG00000135537 | CAAAGUG |
| ENSG00000135537 | GUCCAGA |
| ENSG00000135537 | UCCAGAG |
| ENSG00000135541 | AAUGCCC |
| ENSG00000135541 | UCUCACC |
| ENSG00000135547 | AAGUGCA |
| ENSG00000135547 | GAGAAAU |

|                 |         |
|-----------------|---------|
| ENSG00000135547 | UCUCCAA |
| ENSG00000135549 | AUUCAUU |
| ENSG00000135549 | UCAUUUG |
| ENSG00000135597 | AACGGCU |
| ENSG00000135597 | CACAGUG |
| ENSG00000135597 | GAGCUGC |
| ENSG00000135597 | UCACAGG |
| ENSG00000135597 | UCACAGU |
| ENSG00000135604 | CAGUGCA |
| ENSG00000135604 | GUGCUUG |
| ENSG00000135605 | CUCUUCC |
| ENSG00000135605 | UUCAAAU |
| ENSG00000135617 | GGAAUGU |
| ENSG00000135622 | AGUAGUU |
| ENSG00000135622 | AUCCUUG |
| ENSG00000135622 | CACAGGG |
| ENSG00000135622 | GAAGGUC |
| ENSG00000135622 | GGAGUCC |
| ENSG00000135622 | UCCCACC |
| ENSG00000135622 | UGCAUAG |
| ENSG00000135622 | UGCAUAU |
| ENSG00000135624 | UCCUUGC |
| ENSG00000135625 | AAUUGCU |
| ENSG00000135625 | UGCAAAG |
| ENSG00000135631 | AAGGCAC |
| ENSG00000135631 | AGCAGCA |
| ENSG00000135631 | CAAAGUG |
| ENSG00000135631 | CAGCAA  |
| ENSG00000135631 | GGAAGAC |
| ENSG00000135631 | GGGGCAG |
| ENSG00000135631 | UGCCUG  |
| ENSG00000135631 | UGGCCAC |
| ENSG00000135632 | AAGGCAC |
| ENSG00000135632 | AGCAGCA |
| ENSG00000135632 | AGGGUCU |
| ENSG00000135632 | CACCACC |
| ENSG00000135632 | CAGCAGA |
| ENSG00000135632 | CUGGAAA |
| ENSG00000135632 | UCACCAC |
| ENSG00000135632 | UCUGGAA |
| ENSG00000135632 | UCUGGAG |
| ENSG00000135636 | GGAGGAG |
| ENSG00000135638 | AUCACUA |
| ENSG00000135638 | CUGGAAA |
| ENSG00000135638 | GCUGGAU |
| ENSG00000135655 | AAGUGCA |
| ENSG00000135655 | AGCAGCU |
| ENSG00000135655 | AGGUAGU |
| ENSG00000135655 | AGUACUG |
| ENSG00000135655 | AUACAAG |
| ENSG00000135655 | AUGGCUU |
| ENSG00000135655 | GUAAACA |
| ENSG00000135655 | UAUAAAG |
| ENSG00000135655 | UGGGACA |
| ENSG00000135655 | UUGGCAA |
| ENSG00000135655 | UUGGCAC |
| ENSG00000135655 | UUGUGAC |
| ENSG00000135655 | UUUUUGC |
| ENSG00000135677 | AAAGCUG |
| ENSG00000135677 | AAGGCAC |
| ENSG00000135677 | AAGUGCA |
| ENSG00000135677 | AAUCACU |
| ENSG00000135677 | AAUUUUA |
| ENSG00000135677 | AGCCCUU |

|                 |          |
|-----------------|----------|
| ENSG00000135677 | AUUGCAC  |
| ENSG00000135677 | CACAGUG  |
| ENSG00000135677 | CAGCUGG  |
| ENSG00000135677 | GACCUGG  |
| ENSG00000135677 | GAGGCUG  |
| ENSG00000135677 | GAGGUAG  |
| ENSG00000135677 | GAGGUAU  |
| ENSG00000135677 | GAGUUGA  |
| ENSG00000135677 | GCAGCAU  |
| ENSG00000135677 | UCACAGG  |
| ENSG00000135677 | UUCAAAU  |
| ENSG00000135677 | UUCUAAU  |
| ENSG00000135677 | UUUCAAC  |
| ENSG00000135678 | AACCUGU  |
| ENSG00000135678 | AGGUAGU  |
| ENSG00000135678 | CAA AUGC |
| ENSG00000135678 | CCCUGAG  |
| ENSG00000135678 | GAGGAUA  |
| ENSG00000135678 | GAGGUAG  |
| ENSG00000135678 | GCUUCCU  |
| ENSG00000135678 | UCAAGUA  |
| ENSG00000135678 | UCACAUU  |
| ENSG00000135686 | AAAGCUG  |
| ENSG00000135698 | AGGAUGU  |
| ENSG00000135709 | AAGUGCA  |
| ENSG00000135709 | AAGUGCU  |
| ENSG00000135709 | CUCUGGG  |
| ENSG00000135709 | UCACAAG  |
| ENSG00000135709 | UUGGCAA  |
| ENSG00000135720 | AGGCAGG  |
| ENSG00000135720 | CUUUGGU  |
| ENSG00000135720 | GUAGUGU  |
| ENSG00000135720 | GUGCAA   |
| ENSG00000135720 | UUGGUCC  |
| ENSG00000135720 | UUGGUUC  |
| ENSG00000135723 | AAUACUG  |
| ENSG00000135723 | UCACACA  |
| ENSG00000135740 | AGCUGCC  |
| ENSG00000135740 | UGAGGAC  |
| ENSG00000135744 | CUGCUC   |
| ENSG00000135750 | AAAGAGC  |
| ENSG00000135750 | AAAGAGG  |
| ENSG00000135750 | AUAAAGU  |
| ENSG00000135775 | AAAAAUC  |
| ENSG00000135775 | AAAGUUU  |
| ENSG00000135775 | ACAAUAU  |
| ENSG00000135775 | UCCAUA   |
| ENSG00000135776 | AAGUUGU  |
| ENSG00000135776 | CAAACU   |
| ENSG00000135776 | CAGUGCA  |
| ENSG00000135776 | GUCAUUG  |
| ENSG00000135776 | UCAUUUG  |
| ENSG00000135821 | AAAAAUC  |
| ENSG00000135821 | AGUAACA  |
| ENSG00000135821 | AGUGGUU  |
| ENSG00000135821 | CUAGUCC  |
| ENSG00000135821 | GGAAGCC  |
| ENSG00000135821 | UAGUGAG  |
| ENSG00000135821 | UAUAAAG  |
| ENSG00000135821 | UUUUUGC  |
| ENSG00000135823 | AAAGUGC  |
| ENSG00000135823 | AAGUUGU  |
| ENSG00000135823 | AAUCUCA  |
| ENSG00000135823 | ACUAGAU  |

|                 |         |
|-----------------|---------|
| ENSG00000135823 | CAGUUAC |
| ENSG00000135823 | CCUUCUU |
| ENSG00000135823 | CUUACAG |
| ENSG00000135823 | GCCCUUA |
| ENSG00000135823 | GGAAUGU |
| ENSG00000135823 | GGCUCUG |
| ENSG00000135823 | GUAAACA |
| ENSG00000135823 | UAAUGCU |
| ENSG00000135823 | UAUAAAG |
| ENSG00000135823 | UCACAGG |
| ENSG00000135823 | UGAGAAG |
| ENSG00000135828 | GAGAACU |
| ENSG00000135837 | AAACGGU |
| ENSG00000135837 | AAAGUAA |
| ENSG00000135837 | AAAGUAC |
| ENSG00000135837 | AACAAAC |
| ENSG00000135837 | AAGGCAC |
| ENSG00000135837 | AAUCUCU |
| ENSG00000135837 | ACACACC |
| ENSG00000135837 | ACAGUAU |
| ENSG00000135837 | ACAUUCA |
| ENSG00000135837 | ACUGGAU |
| ENSG00000135837 | AGCAGCA |
| ENSG00000135837 | AGCAGCG |
| ENSG00000135837 | AGCAGCU |
| ENSG00000135837 | AGGCAGG |
| ENSG00000135837 | AGGUAGU |
| ENSG00000135837 | AUGGCUU |
| ENSG00000135837 | CAAGAGC |
| ENSG00000135837 | CAGUUAC |
| ENSG00000135837 | CUUUGGU |
| ENSG00000135837 | GCAGAAG |
| ENSG00000135837 | GCCUGAU |
| ENSG00000135837 | GCCUGGA |
| ENSG00000135837 | GGAGGCA |
| ENSG00000135837 | GGUUUAC |
| ENSG00000135837 | UAUAAAG |
| ENSG00000135837 | UCCUGAG |
| ENSG00000135837 | UGCAUUG |
| ENSG00000135837 | UGGCUGC |
| ENSG00000135837 | UGUCUUU |
| ENSG00000135837 | UUCAAGC |
| ENSG00000135837 | UCCUAG  |
| ENSG00000135838 | GAGAAAU |
| ENSG00000135842 | GGUUACC |
| ENSG00000135842 | UCUCAA  |
| ENSG00000135842 | UUCUUGU |
| ENSG00000135862 | AAAGUAC |
| ENSG00000135862 | AAAUUUC |
| ENSG00000135862 | AAUCUCA |
| ENSG00000135862 | ACAUUCA |
| ENSG00000135862 | ACCACAG |
| ENSG00000135862 | ACUGGCU |
| ENSG00000135862 | AGCACCA |
| ENSG00000135862 | AGUGCAA |
| ENSG00000135862 | CCAGUGU |
| ENSG00000135862 | CUUCUCU |
| ENSG00000135862 | GGAGUGU |
| ENSG00000135862 | GUGUCAC |
| ENSG00000135862 | GUGUGGC |
| ENSG00000135862 | UAAUAGU |
| ENSG00000135862 | UACAAAG |
| ENSG00000135862 | UAUAUGA |
| ENSG00000135862 | UCAUGAU |

|                 |         |
|-----------------|---------|
| ENSG00000135862 | UGAGAAG |
| ENSG00000135862 | UGCAUAG |
| ENSG00000135862 | UGCAUUG |
| ENSG00000135870 | AAACUGU |
| ENSG00000135870 | AACAGUC |
| ENSG00000135870 | AAGUCUU |
| ENSG00000135870 | ACAGUAC |
| ENSG00000135870 | ACAGUAU |
| ENSG00000135870 | AGUGCUU |
| ENSG00000135870 | AGUGGUU |
| ENSG00000135870 | AUACCUC |
| ENSG00000135870 | AUCCUUG |
| ENSG00000135870 | AUGAGCU |
| ENSG00000135870 | AUGAUGC |
| ENSG00000135870 | AUGUGCC |
| ENSG00000135870 | CAAAGCA |
| ENSG00000135870 | CACUGUU |
| ENSG00000135870 | CCAGUGC |
| ENSG00000135870 | CCUUCUG |
| ENSG00000135870 | CCUUCUU |
| ENSG00000135870 | CGGGGAU |
| ENSG00000135870 | CUGACUC |
| ENSG00000135870 | CUGCAGC |
| ENSG00000135870 | CUGCAGG |
| ENSG00000135870 | CUGGGCA |
| ENSG00000135870 | CUUUGGU |
| ENSG00000135870 | GAAUUGU |
| ENSG00000135870 | GAGGCAG |
| ENSG00000135870 | GAUUGGU |
| ENSG00000135870 | GCAACUU |
| ENSG00000135870 | GCAGCAU |
| ENSG00000135870 | GCAGGAC |
| ENSG00000135870 | GCAGGUU |
| ENSG00000135870 | GGCAGGG |
| ENSG00000135870 | GGCUCUG |
| ENSG00000135870 | GGGUAAG |
| ENSG00000135870 | GUCACUC |
| ENSG00000135870 | GUCAGUU |
| ENSG00000135870 | UAGACUG |
| ENSG00000135870 | UAUUACC |
| ENSG00000135870 | UCAUUCG |
| ENSG00000135870 | UCCAGUU |
| ENSG00000135870 | UCCCUUU |
| ENSG00000135870 | UGACUGU |
| ENSG00000135870 | UGGACUG |
| ENSG00000135870 | UUGAGGC |
| ENSG00000135903 | ACUGCAG |
| ENSG00000135903 | ACUGCAU |
| ENSG00000135903 | UAUAAAG |
| ENSG00000135912 | GAGGUAG |
| ENSG00000135912 | GAGGUAU |
| ENSG00000135913 | AAAGUAA |
| ENSG00000135913 | AAAGUGC |
| ENSG00000135913 | AAGUCAC |
| ENSG00000135913 | AGCACCA |
| ENSG00000135913 | AGCUGCC |
| ENSG00000135913 | AGUGCCG |
| ENSG00000135913 | CCAGGAG |
| ENSG00000135913 | CCAGUGC |
| ENSG00000135913 | CCAGUGU |
| ENSG00000135913 | CCUGAG  |
| ENSG00000135913 | CUCCAUI |
| ENSG00000135913 | GAGCUGC |
| ENSG00000135913 | GCAACUU |

|                 |         |
|-----------------|---------|
| ENSG00000135913 | GUGGCC  |
| ENSG00000135913 | UCCAGUU |
| ENSG00000135913 | UUGAUCA |
| ENSG00000135913 | UUGGUUC |
| ENSG00000135913 | UUUCAAC |
| ENSG00000135916 | AAGGCAC |
| ENSG00000135916 | AGGGAGG |
| ENSG00000135916 | AUACAAG |
| ENSG00000135916 | CUUUGGU |
| ENSG00000135916 | GUGCUUG |
| ENSG00000135916 | UACAAAG |
| ENSG00000135916 | UGUGCUU |
| ENSG00000135916 | UUGGUUC |
| ENSG00000135919 | AGUAGUU |
| ENSG00000135919 | CAGUAGA |
| ENSG00000135924 | GUCUCUG |
| ENSG00000135924 | UAAGACU |
| ENSG00000135925 | AGUGCAA |
| ENSG00000135925 | CUGGACU |
| ENSG00000135925 | GUGCAA  |
| ENSG00000135926 | CUUCACC |
| ENSG00000135932 | AACAUUC |
| ENSG00000135932 | AACCGUU |
| ENSG00000135932 | AAUACUG |
| ENSG00000135932 | AAUUUUA |
| ENSG00000135932 | AGCAGCA |
| ENSG00000135932 | AGCAGCU |
| ENSG00000135932 | GUGCCUG |
| ENSG00000135932 | UAAUGCU |
| ENSG00000135945 | AAAAACC |
| ENSG00000135945 | AAAACUG |
| ENSG00000135945 | AAUACUG |
| ENSG00000135945 | ACAGUAC |
| ENSG00000135945 | ACAGUAU |
| ENSG00000135945 | AUACCUC |
| ENSG00000135945 | CACUGUU |
| ENSG00000135945 | CAGGCUC |
| ENSG00000135945 | CCUGUAC |
| ENSG00000135945 | CUACAGU |
| ENSG00000135945 | GCUACAU |
| ENSG00000135945 | UACAGUU |
| ENSG00000135945 | UGCAAAG |
| ENSG00000135945 | UUGGCAA |
| ENSG00000135945 | UUUGCAA |
| ENSG00000135951 | AGAUAAA |
| ENSG00000135956 | ACAUUCA |
| ENSG00000135956 | AGCACCA |
| ENSG00000135956 | AUGACAC |
| ENSG00000135956 | CACAGGG |
| ENSG00000135956 | CAGUGCA |
| ENSG00000135956 | CCUGCUG |
| ENSG00000135956 | CUCUGGG |
| ENSG00000135956 | GAGAUGA |
| ENSG00000135956 | UAUAUGA |
| ENSG00000135956 | UCCUAUA |
| ENSG00000135956 | UCCUGAG |
| ENSG00000135956 | UUGGCAA |
| ENSG00000135956 | UUGGCAC |
| ENSG00000135960 | AAAGAGG |
| ENSG00000135960 | ACAGUAU |
| ENSG00000135960 | ACAUUCA |
| ENSG00000135960 | ACUGGCU |
| ENSG00000135960 | AGCAGCA |
| ENSG00000135960 | AUGAUGA |



|                 |          |
|-----------------|----------|
| ENSG00000135960 | CACAGUG  |
| ENSG00000135960 | CAGCAAA  |
| ENSG00000135960 | GGAUUUC  |
| ENSG00000135960 | GGCUCAG  |
| ENSG00000135960 | UAAGACG  |
| ENSG00000135960 | UCACAGU  |
| ENSG00000135968 | AAAGUGC  |
| ENSG00000135968 | AACAAAC  |
| ENSG00000135968 | AAGUGCA  |
| ENSG00000135968 | ACAGUAC  |
| ENSG00000135968 | AGCACCA  |
| ENSG00000135968 | AGCAGCA  |
| ENSG00000135968 | AGUGCAA  |
| ENSG00000135968 | CACUGUU  |
| ENSG00000135968 | CAGCAAA  |
| ENSG00000135968 | CAGCAGA  |
| ENSG00000135968 | CAGCAGG  |
| ENSG00000135968 | GUGCAAA  |
| ENSG00000135968 | UAAUAGU  |
| ENSG00000135968 | UGCAAAG  |
| ENSG00000135999 | AACAAAC  |
| ENSG00000135999 | AACAUUC  |
| ENSG00000135999 | AAGAACC  |
| ENSG00000135999 | AAGUCAC  |
| ENSG00000135999 | AAGUGCA  |
| ENSG00000135999 | AAGUUGU  |
| ENSG00000135999 | AGGUAGU  |
| ENSG00000135999 | AGUGAUC  |
| ENSG00000135999 | AUCCCUU  |
| ENSG00000135999 | AUGAUGA  |
| ENSG00000135999 | CAUAUUG  |
| ENSG00000135999 | CUUACAG  |
| ENSG00000135999 | GAAAACA  |
| ENSG00000135999 | GAUAUGU  |
| ENSG00000135999 | GUGCAAA  |
| ENSG00000135999 | UACAAAG  |
| ENSG00000135999 | UCAUGAU  |
| ENSG00000135999 | UCCCUGU  |
| ENSG00000135999 | UCCCUUU  |
| ENSG00000135999 | UGAAAUG  |
| ENSG00000135999 | UGCAAAG  |
| ENSG00000136002 | AAGGCAC  |
| ENSG00000136002 | AUGGCUU  |
| ENSG00000136002 | CUGGCUC  |
| ENSG00000136002 | UGGAGAU  |
| ENSG00000136002 | UGUGUCA  |
| ENSG00000136011 | AUGGCUU  |
| ENSG00000136011 | CACAGUG  |
| ENSG00000136011 | GAGGUAG  |
| ENSG00000136011 | GAGGUAU  |
| ENSG00000136014 | GAGGUAG  |
| ENSG00000136014 | GAGGUAU  |
| ENSG00000136021 | UACAAAG  |
| ENSG00000136026 | UGCAUUAU |
| ENSG00000136026 | UUGGUCC  |
| ENSG00000136044 | AUAUUAU  |
| ENSG00000136044 | GAUUGUC  |
| ENSG00000136044 | UUGGUCC  |
| ENSG00000136051 | CACAGUG  |
| ENSG00000136051 | CUCACAC  |
| ENSG00000136051 | GAAAACA  |
| ENSG00000136051 | UCACAGU  |
| ENSG00000136051 | UCUCACC  |
| ENSG00000136051 | UUAUGCA  |

|                 |         |
|-----------------|---------|
| ENSG00000136052 | AGUGGUU |
| ENSG00000136068 | UACAAAG |
| ENSG00000136068 | UACAGUU |
| ENSG00000136068 | UCACAUU |
| ENSG00000136099 | AAUACUG |
| ENSG00000136099 | ACAGUAC |
| ENSG00000136099 | UUGGCAC |
| ENSG00000136099 | UUUGCAA |
| ENSG00000136100 | AAGACAU |
| ENSG00000136100 | AGCACCA |
| ENSG00000136100 | CCCUGAG |
| ENSG00000136100 | CUAUACA |
| ENSG00000136100 | UUCAAAU |
| ENSG00000136104 | UUUCAAC |
| ENSG00000136108 | UGAAAUG |
| ENSG00000136111 | AGGCAGG |
| ENSG00000136111 | CAGUAGU |
| ENSG00000136111 | CUACAAA |
| ENSG00000136111 | GAAACAU |
| ENSG00000136111 | GGCAGGG |
| ENSG00000136111 | GUCAGUU |
| ENSG00000136111 | UACAAAG |
| ENSG00000136111 | UGGAGAU |
| ENSG00000136111 | UUCAAGC |
| ENSG00000136111 | UUGGAGG |
| ENSG00000136111 | UUGGCAC |
| ENSG00000136122 | AGCCCUU |
| ENSG00000136122 | GCAACUU |
| ENSG00000136141 | GGAUUUU |
| ENSG00000136144 | GUAAACA |
| ENSG00000136144 | UUCAAGC |
| ENSG00000136144 | UUCUAAU |
| ENSG00000136146 | ACUGGAU |
| ENSG00000136152 | AAAAACC |
| ENSG00000136152 | ACAAUAU |
| ENSG00000136152 | AUAAAGU |
| ENSG00000136152 | GAAACAU |
| ENSG00000136152 | GGCAUUG |
| ENSG00000136152 | UAUAAAG |
| ENSG00000136152 | UUGGCAA |
| ENSG00000136152 | UUGGCAC |
| ENSG00000136153 | ACUGCAG |
| ENSG00000136153 | AGCAGCA |
| ENSG00000136153 | AGUGCUU |
| ENSG00000136153 | AUAUUAU |
| ENSG00000136153 | CAGCAA  |
| ENSG00000136153 | UACAAAG |
| ENSG00000136153 | UGUGCUU |
| ENSG00000136156 | AUUGCAC |
| ENSG00000136158 | AAAACUG |
| ENSG00000136158 | AAUUUUA |
| ENSG00000136158 | CACAGUG |
| ENSG00000136158 | GAAAACA |
| ENSG00000136158 | GGAGUGU |
| ENSG00000136158 | UAAUAUC |
| ENSG00000136158 | UAUAAAG |
| ENSG00000136158 | UAUAAUA |
| ENSG00000136158 | UCACAAG |
| ENSG00000136158 | UCACAGG |
| ENSG00000136158 | UUAUGCA |
| ENSG00000136160 | AAGUGCA |
| ENSG00000136160 | AGUGCUU |
| ENSG00000136160 | CCCACCU |
| ENSG00000136160 | GAGAACC |

|                 |          |
|-----------------|----------|
| ENSG00000136160 | GAGAACU  |
| ENSG00000136160 | GCUGGAU  |
| ENSG00000136161 | AGCCCUU  |
| ENSG00000136167 | AAAGUAA  |
| ENSG00000136167 | AAGGCAC  |
| ENSG00000136167 | GUAAACA  |
| ENSG00000136167 | UUGGCAC  |
| ENSG00000136193 | AAUCCUU  |
| ENSG00000136193 | ACUGCAG  |
| ENSG00000136193 | ACUGGAU  |
| ENSG00000136193 | AGCUUUA  |
| ENSG00000136193 | AUCCUUU  |
| ENSG00000136193 | CUCAAAC  |
| ENSG00000136193 | GCAGGAC  |
| ENSG00000136193 | GCUGGUG  |
| ENSG00000136193 | UAAGACG  |
| ENSG00000136197 | CUUUGGU  |
| ENSG00000136205 | AUACAAG  |
| ENSG00000136205 | AUUCAUU  |
| ENSG00000136205 | CUAUACA  |
| ENSG00000136205 | CUGCAGC  |
| ENSG00000136205 | GACCCUG  |
| ENSG00000136205 | GCAGCAU  |
| ENSG00000136205 | UACAGUU  |
| ENSG00000136205 | UCAUUUG  |
| ENSG00000136205 | UUGGCAA  |
| ENSG00000136213 | AUAUUUA  |
| ENSG00000136213 | GGCAGUG  |
| ENSG00000136213 | UGCAAAG  |
| ENSG00000136231 | ACAUUCA  |
| ENSG00000136231 | AGGUAGU  |
| ENSG00000136231 | GAGGUAU  |
| ENSG00000136231 | GCCUGGA  |
| ENSG00000136231 | GCCUGGG  |
| ENSG00000136231 | UCCCUUG  |
| ENSG00000136231 | UCCUUUU  |
| ENSG00000136231 | UGUCUUU  |
| ENSG00000136237 | AAAGUGC  |
| ENSG00000136237 | AACACUG  |
| ENSG00000136237 | AACAGUC  |
| ENSG00000136237 | AAUUUAU  |
| ENSG00000136237 | AAUUUUA  |
| ENSG00000136237 | ACUCAGC  |
| ENSG00000136237 | AGGUAGU  |
| ENSG00000136237 | AGUGCUG  |
| ENSG00000136237 | AGUGC UU |
| ENSG00000136237 | CAGCAA   |
| ENSG00000136237 | GAGAAGA  |
| ENSG00000136237 | GAUUGUA  |
| ENSG00000136237 | GAUUGUC  |
| ENSG00000136237 | GGUAGAC  |
| ENSG00000136237 | UAAUGCU  |
| ENSG00000136237 | UAGGUAU  |
| ENSG00000136237 | UGAGAAG  |
| ENSG00000136237 | UGCAAAG  |
| ENSG00000136237 | UGGCCAC  |
| ENSG00000136238 | AAUACUG  |
| ENSG00000136238 | AUACAAG  |
| ENSG00000136238 | UAUUGCU  |
| ENSG00000136238 | UCAUACA  |
| ENSG00000136238 | UGCAUUG  |
| ENSG00000136238 | UUGGCAC  |
| ENSG00000136240 | AAGGCAC  |
| ENSG00000136240 | ACACACC  |

|                 |          |
|-----------------|----------|
| ENSG00000136240 | CCUUCUU  |
| ENSG00000136240 | GGAAUGU  |
| ENSG00000136240 | GGCAAGA  |
| ENSG00000136240 | UUAGGAU  |
| ENSG00000136261 | AUGGCUU  |
| ENSG00000136261 | GAGGUAG  |
| ENSG00000136261 | UGUGCUU  |
| ENSG00000136267 | AAUUAUU  |
| ENSG00000136267 | AUCACUA  |
| ENSG00000136267 | CUUUGGU  |
| ENSG00000136267 | GGUGGGC  |
| ENSG00000136267 | UUAUGCA  |
| ENSG00000136279 | CACCACC  |
| ENSG00000136279 | CACUGUU  |
| ENSG00000136279 | CUUUGGU  |
| ENSG00000136279 | UUGGUCC  |
| ENSG00000136280 | AAUUAUU  |
| ENSG00000136280 | CAAAACU  |
| ENSG00000136280 | CACAGUG  |
| ENSG00000136280 | CAGUAGA  |
| ENSG00000136280 | UCACAGG  |
| ENSG00000136280 | UCACAGU  |
| ENSG00000136295 | ACAGUAC  |
| ENSG00000136295 | ACCAGCA  |
| ENSG00000136295 | CAGCAA   |
| ENSG00000136295 | GCCUGGG  |
| ENSG00000136295 | GUGAGGU  |
| ENSG00000136295 | UAGUGAG  |
| ENSG00000136295 | UGCAUAG  |
| ENSG00000136295 | UGCAUAU  |
| ENSG00000136295 | UGUGCUU  |
| ENSG00000136295 | UUGGCAA  |
| ENSG00000136295 | UUGGCAC  |
| ENSG00000136295 | UUGGUCC  |
| ENSG00000136297 | UAAUACA  |
| ENSG00000136319 | AAUACUG  |
| ENSG00000136327 | CUCUGGG  |
| ENSG00000136352 | AAAGAAU  |
| ENSG00000136352 | UGUGUCA  |
| ENSG00000136352 | UUGACAC  |
| ENSG00000136352 | UUGUGUC  |
| ENSG00000136378 | GCACCAU  |
| ENSG00000136378 | GGUGGGC  |
| ENSG00000136379 | CCAGUGC  |
| ENSG00000136379 | UAUAAAAG |
| ENSG00000136381 | AAAUGGU  |
| ENSG00000136381 | ACACACU  |
| ENSG00000136381 | ACUGUUU  |
| ENSG00000136381 | CAGUAGU  |
| ENSG00000136381 | CAUGGAU  |
| ENSG00000136381 | CUUACAG  |
| ENSG00000136381 | UACAAAG  |
| ENSG00000136381 | UAUGGUU  |
| ENSG00000136383 | AAUUUUA  |
| ENSG00000136383 | AUUGCAC  |
| ENSG00000136383 | CCCCCAG  |
| ENSG00000136383 | CUGCAGC  |
| ENSG00000136383 | GAGGUAG  |
| ENSG00000136383 | GCCUGGA  |
| ENSG00000136383 | GGUGGGC  |
| ENSG00000136383 | GUAAACA  |
| ENSG00000136383 | UAUUGCU  |
| ENSG00000136383 | UGCAUUG  |
| ENSG00000136404 | UCACAAG  |

|                 |         |
|-----------------|---------|
| ENSG00000136425 | AGCCCUU |
| ENSG00000136425 | GAGCCCU |
| ENSG00000136425 | UCACAUU |
| ENSG00000136425 | UGAAAGG |
| ENSG00000136425 | UGCAUUA |
| ENSG00000136425 | UGCUGAC |
| ENSG00000136444 | CCCCUGG |
| ENSG00000136448 | AAAGAGC |
| ENSG00000136448 | AAGGCAC |
| ENSG00000136448 | ACAAGGU |
| ENSG00000136448 | ACAUUCA |
| ENSG00000136448 | AGCAGCU |
| ENSG00000136448 | AGCCCUU |
| ENSG00000136448 | AGGAUGU |
| ENSG00000136448 | AGGGAGG |
| ENSG00000136448 | AUAAUAC |
| ENSG00000136448 | AUAUAAC |
| ENSG00000136448 | AUCCUUG |
| ENSG00000136448 | CAGCAGA |
| ENSG00000136448 | CAGCAGG |
| ENSG00000136448 | CAGCUGG |
| ENSG00000136448 | CAGUUAC |
| ENSG00000136448 | CCGGUUC |
| ENSG00000136448 | CUUGGAG |
| ENSG00000136448 | CUUUGGU |
| ENSG00000136448 | GAAAACA |
| ENSG00000136448 | GCUGGUG |
| ENSG00000136448 | GGUGGGC |
| ENSG00000136448 | GUCCAGA |
| ENSG00000136448 | GUCUGCC |
| ENSG00000136448 | UCCCUUU |
| ENSG00000136448 | UCUCACC |
| ENSG00000136448 | UGAAGCU |
| ENSG00000136448 | UUGAUCA |
| ENSG00000136448 | UUGGCAA |
| ENSG00000136448 | UUGGUCC |
| ENSG00000136451 | AAAACUG |
| ENSG00000136451 | AAACUGU |
| ENSG00000136451 | AAAGGUA |
| ENSG00000136451 | AAGGCAC |
| ENSG00000136451 | AAUACUG |
| ENSG00000136451 | AAUUAUU |
| ENSG00000136451 | GGAAUGU |
| ENSG00000136451 | UAUCAGA |
| ENSG00000136451 | UCUCCAA |
| ENSG00000136451 | UGUAUAA |
| ENSG00000136457 | CAAAGCA |
| ENSG00000136457 | CAGUAGA |
| ENSG00000136457 | CAGUAGU |
| ENSG00000136478 | AAGGUGC |
| ENSG00000136478 | AUGGCUU |
| ENSG00000136478 | UUGGCAA |
| ENSG00000136490 | AAGGCAC |
| ENSG00000136490 | ACAAUAU |
| ENSG00000136490 | AGUGCAA |
| ENSG00000136490 | CAGUGCA |
| ENSG00000136490 | CCAGUGU |
| ENSG00000136490 | CCCUGAG |
| ENSG00000136490 | CUGACUC |
| ENSG00000136490 | CUGCAGC |
| ENSG00000136490 | GAAUUGU |
| ENSG00000136490 | GACCCUG |
| ENSG00000136490 | GAGCCCU |
| ENSG00000136490 | GCUGGAU |

|                 |         |
|-----------------|---------|
| ENSG00000136490 | GGGAGCU |
| ENSG00000136490 | GUGCAAA |
| ENSG00000136490 | UCCUUGC |
| ENSG00000136490 | UCGUGCA |
| ENSG00000136490 | UGCAAAG |
| ENSG00000136490 | UGCUGAC |
| ENSG00000136504 | AAGGCAC |
| ENSG00000136504 | ACAGUAC |
| ENSG00000136504 | ACAGUAU |
| ENSG00000136504 | ACCACAG |
| ENSG00000136504 | ACUGUAG |
| ENSG00000136504 | AGGUUAU |
| ENSG00000136504 | CACAGUG |
| ENSG00000136504 | CUGCAGC |
| ENSG00000136504 | CUGCAGG |
| ENSG00000136504 | CUGGCUC |
| ENSG00000136504 | GAGAAAU |
| ENSG00000136504 | GAGAACC |
| ENSG00000136504 | GAGAUGA |
| ENSG00000136504 | GCAGGUU |
| ENSG00000136504 | GGCAGGG |
| ENSG00000136504 | GUAGUGU |
| ENSG00000136504 | GUGACUG |
| ENSG00000136504 | UCACAAG |
| ENSG00000136504 | UCGCUGC |
| ENSG00000136504 | UUGGCAC |
| ENSG00000136521 | AAAGAGC |
| ENSG00000136521 | AAAGAGG |
| ENSG00000136521 | AGCAAAA |
| ENSG00000136531 | AACAGUC |
| ENSG00000136531 | ACUGCAG |
| ENSG00000136531 | AUGCACC |
| ENSG00000136531 | AUGGCUU |
| ENSG00000136531 | CAGCAGA |
| ENSG00000136531 | CAGCAGG |
| ENSG00000136531 | CUCAAAC |
| ENSG00000136531 | GUCAACA |
| ENSG00000136531 | GUCAGUU |
| ENSG00000136531 | UAUAAUA |
| ENSG00000136531 | UAUUGCU |
| ENSG00000136531 | UGCAAAG |
| ENSG00000136531 | UGCUCAC |
| ENSG00000136531 | UUGGCAA |
| ENSG00000136531 | UUGGCAC |
| ENSG00000136535 | AAAAACC |
| ENSG00000136535 | AACACUG |
| ENSG00000136535 | AACUGGU |
| ENSG00000136535 | ACAAUAU |
| ENSG00000136535 | CACAGGG |
| ENSG00000136535 | GAGACCU |
| ENSG00000136535 | GUGCCUG |
| ENSG00000136535 | UCACAGU |
| ENSG00000136535 | UUGUUCG |
| ENSG00000136536 | ACAGUAC |
| ENSG00000136536 | CUACAGU |
| ENSG00000136536 | GACAACU |
| ENSG00000136541 | GAAUUGU |
| ENSG00000136541 | GUUAAUG |
| ENSG00000136574 | AAAUUUC |
| ENSG00000136574 | AAGACAU |
| ENSG00000136574 | AAUACUG |
| ENSG00000136574 | AGAUAAA |
| ENSG00000136574 | AGCAGCA |
| ENSG00000136574 | AGCCAGU |

|                 |         |
|-----------------|---------|
| ENSG00000136574 | CAGCAGA |
| ENSG00000136574 | GGAGUCC |
| ENSG00000136574 | UAAGACG |
| ENSG00000136574 | UAAGACU |
| ENSG00000136574 | UCAAGUA |
| ENSG00000136574 | UCUGGAA |
| ENSG00000136630 | CACAGUG |
| ENSG00000136630 | GUAAACA |
| ENSG00000136630 | UCACAGU |
| ENSG00000136631 | ACCUGGA |
| ENSG00000136631 | GGAAUGU |
| ENSG00000136634 | GAGGUAG |
| ENSG00000136634 | UAUAAAG |
| ENSG00000136634 | UCACAGG |
| ENSG00000136634 | UCACAGU |
| ENSG00000136634 | UUCUAAU |
| ENSG00000136636 | AGCACCA |
| ENSG00000136636 | GUAAACA |
| ENSG00000136643 | ACAUUCA |
| ENSG00000136643 | UCCUUG  |
| ENSG00000136653 | ACCAGCA |
| ENSG00000136653 | AGCAGCA |
| ENSG00000136653 | AGCAUUC |
| ENSG00000136653 | CAGCAGA |
| ENSG00000136653 | GAAAACA |
| ENSG00000136653 | GAGAAAU |
| ENSG00000136653 | GCAGCAU |
| ENSG00000136653 | GGAGUGU |
| ENSG00000136653 | UCACAGG |
| ENSG00000136653 | UCACAGU |
| ENSG00000136653 | UCCUGAG |
| ENSG00000136653 | UGCAAAG |
| ENSG00000136653 | UGUGCUU |
| ENSG00000136689 | GGAGUGU |
| ENSG00000136695 | AGCAGCA |
| ENSG00000136699 | UCACAGG |
| ENSG00000136699 | UUGGUCC |
| ENSG00000136709 | AAAAAUC |
| ENSG00000136709 | UAAUACA |
| ENSG00000136717 | AGCAGCU |
| ENSG00000136720 | AAAGCUG |
| ENSG00000136720 | ACAUUCA |
| ENSG00000136720 | AUGGCUU |
| ENSG00000136720 | AUUCAUU |
| ENSG00000136720 | GGGUUUA |
| ENSG00000136720 | UCAAGUA |
| ENSG00000136720 | UCAUUCG |
| ENSG00000136720 | UCCAGUU |
| ENSG00000136732 | CCUGCUG |
| ENSG00000136754 | AAGUGCA |
| ENSG00000136754 | ACAUUCA |
| ENSG00000136754 | AGGUUAU |
| ENSG00000136754 | AUAUUAU |
| ENSG00000136754 | AUGCAUU |
| ENSG00000136754 | CUUUGGU |
| ENSG00000136754 | GGUUUAC |
| ENSG00000136754 | UAAGACG |
| ENSG00000136754 | UAAGACU |
| ENSG00000136754 | UAUAAAG |
| ENSG00000136754 | UCAUGAU |
| ENSG00000136754 | UGGGACA |
| ENSG00000136758 | AAAGUAA |
| ENSG00000136758 | AACAAAC |
| ENSG00000136758 | AAGGCAC |

|                 |         |
|-----------------|---------|
| ENSG00000136758 | AAUACUG |
| ENSG00000136758 | ACCAGCA |
| ENSG00000136758 | ACUGCAG |
| ENSG00000136758 | UCACAAG |
| ENSG00000136758 | UGAGAAU |
| ENSG00000136770 | GAGGUAG |
| ENSG00000136770 | GAGGUAU |
| ENSG00000136802 | AACACUG |
| ENSG00000136802 | AACGGAA |
| ENSG00000136802 | AAUACUG |
| ENSG00000136802 | ACUGGCC |
| ENSG00000136802 | GGAAUGU |
| ENSG00000136802 | UAAGACG |
| ENSG00000136802 | UAAGACU |
| ENSG00000136802 | UGUAUAA |
| ENSG00000136802 | UGUCUUU |
| ENSG00000136807 | CAGUCCA |
| ENSG00000136807 | GGAAUGU |
| ENSG00000136807 | GGACCUG |
| ENSG00000136813 | AAAGCUG |
| ENSG00000136813 | AUGAUGC |
| ENSG00000136813 | AUGGCAC |
| ENSG00000136813 | GCUACAU |
| ENSG00000136816 | GGAUUUC |
| ENSG00000136816 | GUGCAAA |
| ENSG00000136816 | UAUUGCU |
| ENSG00000136819 | AAAAGUA |
| ENSG00000136826 | AAUACUG |
| ENSG00000136826 | AAUUAUU |
| ENSG00000136826 | ACCACAG |
| ENSG00000136826 | AGAUAAA |
| ENSG00000136826 | AGCACCA |
| ENSG00000136826 | AGUGCUG |
| ENSG00000136826 | AUGGCUU |
| ENSG00000136826 | CACAGUG |
| ENSG00000136826 | GCACCAU |
| ENSG00000136826 | GCAGCAU |
| ENSG00000136826 | GCUUCCU |
| ENSG00000136826 | GUCUGCC |
| ENSG00000136826 | UACAAAG |
| ENSG00000136826 | UAUUGCU |
| ENSG00000136826 | UCAAGUA |
| ENSG00000136826 | UCCAGUU |
| ENSG00000136826 | UCCUUGC |
| ENSG00000136826 | UGUCUGC |
| ENSG00000136826 | UUGUUCG |
| ENSG00000136827 | AAAACUG |
| ENSG00000136827 | GAAACAU |
| ENSG00000136827 | GAGCCCU |
| ENSG00000136827 | GGGAGCU |
| ENSG00000136827 | UCCUUGC |
| ENSG00000136828 | AAAGUAC |
| ENSG00000136828 | AACAAAC |
| ENSG00000136828 | AACACUG |
| ENSG00000136828 | AAGGCAC |
| ENSG00000136828 | AAGUGUG |
| ENSG00000136828 | ACAGUAC |
| ENSG00000136828 | ACAGUAU |
| ENSG00000136828 | ACAUUAC |
| ENSG00000136828 | ACUCAGC |
| ENSG00000136828 | ACUGCAU |
| ENSG00000136828 | ACUUGGA |
| ENSG00000136828 | AGCACCA |
| ENSG00000136828 | AGUGCAA |



|                 |         |
|-----------------|---------|
| ENSG00000136828 | AGUGGUU |
| ENSG00000136828 | AUACAAG |
| ENSG00000136828 | AUGCAUU |
| ENSG00000136828 | CAAAGUG |
| ENSG00000136828 | CAGUCCA |
| ENSG00000136828 | CUUGUGU |
| ENSG00000136828 | GAGAUGA |
| ENSG00000136828 | GAGGCAG |
| ENSG00000136828 | GAGGUAG |
| ENSG00000136828 | GAGGUAU |
| ENSG00000136828 | GCUGGAU |
| ENSG00000136828 | GCUGGUG |
| ENSG00000136828 | GGAGUGU |
| ENSG00000136828 | GGCAGUG |
| ENSG00000136828 | GGGGUGC |
| ENSG00000136828 | GUAACAG |
| ENSG00000136828 | GUCACUC |
| ENSG00000136828 | GUGACUG |
| ENSG00000136828 | GUGCCAC |
| ENSG00000136828 | UACAGUU |
| ENSG00000136828 | UCACAGU |
| ENSG00000136828 | UUGGCAA |
| ENSG00000136830 | AAGGCAC |
| ENSG00000136830 | CCCUGAG |
| ENSG00000136842 | AAGGCAC |
| ENSG00000136842 | ACCCUGU |
| ENSG00000136842 | AGUGCAA |
| ENSG00000136842 | AUAAAGU |
| ENSG00000136842 | UACAGUU |
| ENSG00000136842 | UAUAAAG |
| ENSG00000136842 | UCCAGUU |
| ENSG00000136842 | UGGCCAC |
| ENSG00000136848 | AAAAAUC |
| ENSG00000136848 | AAAAGUA |
| ENSG00000136848 | AAUUGCU |
| ENSG00000136848 | ACAUAGA |
| ENSG00000136848 | ACGCUCA |
| ENSG00000136848 | AGAUAAA |
| ENSG00000136848 | AGCACCA |
| ENSG00000136848 | AUUGCAC |
| ENSG00000136848 | CCAGCAU |
| ENSG00000136848 | CGGCCUG |
| ENSG00000136848 | CUGGCUC |
| ENSG00000136848 | CUUGGAG |
| ENSG00000136848 | GCUGUCU |
| ENSG00000136848 | GGAGAGA |
| ENSG00000136848 | GUCUUGC |
| ENSG00000136848 | GUGCACA |
| ENSG00000136848 | UAAUAUC |
| ENSG00000136848 | UACAAAG |
| ENSG00000136848 | UAUUACC |
| ENSG00000136848 | UAUUGCU |
| ENSG00000136848 | UCACAUU |
| ENSG00000136848 | UGCAAAG |
| ENSG00000136848 | UGCAUUG |
| ENSG00000136848 | UGGAGAU |
| ENSG00000136848 | UUUGCAA |
| ENSG00000136848 | UUUGCAC |
| ENSG00000136848 | UUUUUGC |
| ENSG00000136854 | AACACUG |
| ENSG00000136854 | AGCAGCA |
| ENSG00000136854 | AGUGCUU |
| ENSG00000136854 | CUUUGGU |
| ENSG00000136854 | GUAAACA |

|                 |         |
|-----------------|---------|
| ENSG00000136854 | GUGCUUG |
| ENSG00000136854 | UUCAAGC |
| ENSG00000136854 | UUGGAGG |
| ENSG00000136859 | AAAAACC |
| ENSG00000136859 | ACAAGGU |
| ENSG00000136859 | AUGGCUU |
| ENSG00000136859 | AUUGCAC |
| ENSG00000136859 | GAGAAAU |
| ENSG00000136859 | GAGGUAG |
| ENSG00000136859 | GAGGUAU |
| ENSG00000136859 | GUCAUUG |
| ENSG00000136859 | UAUUGCU |
| ENSG00000136859 | UCCCUUU |
| ENSG00000136868 | AAAGUAA |
| ENSG00000136868 | AAAGUAC |
| ENSG00000136868 | AACAGUC |
| ENSG00000136868 | AACAUUC |
| ENSG00000136868 | AACUGGU |
| ENSG00000136868 | AAUCUCA |
| ENSG00000136868 | AGCACCA |
| ENSG00000136868 | AGCAGCU |
| ENSG00000136868 | AGGUAGU |
| ENSG00000136868 | CAAAACU |
| ENSG00000136868 | CAAAGCA |
| ENSG00000136868 | CAUGGGU |
| ENSG00000136868 | CCUUCUG |
| ENSG00000136868 | CUGUUGA |
| ENSG00000136868 | GAGGUAG |
| ENSG00000136868 | GAUUGUA |
| ENSG00000136868 | GCCCUGU |
| ENSG00000136868 | GGAAUGU |
| ENSG00000136868 | GGGUUUA |
| ENSG00000136868 | GUCAACA |
| ENSG00000136868 | UCCCACA |
| ENSG00000136868 | UCCCACC |
| ENSG00000136868 | UGCCUG  |
| ENSG00000136868 | UUCAAAU |
| ENSG00000136868 | UUGGUUC |
| ENSG00000136868 | UUGUUCG |
| ENSG00000136869 | UGACAUC |
| ENSG00000136870 | AAGGCAC |
| ENSG00000136870 | CUCCAA  |
| ENSG00000136874 | ACUGGAU |
| ENSG00000136874 | ACUGGCU |
| ENSG00000136874 | CCUUCUU |
| ENSG00000136874 | GAGGCAG |
| ENSG00000136874 | GAGGUAG |
| ENSG00000136874 | GAGGUAU |
| ENSG00000136874 | GAGUCUU |
| ENSG00000136874 | GAGUUGG |
| ENSG00000136874 | GCCUGAU |
| ENSG00000136874 | GGCUCAG |
| ENSG00000136874 | GGUGGGC |
| ENSG00000136874 | UAUAAUA |
| ENSG00000136874 | UAUUGCU |
| ENSG00000136874 | UUGACAC |
| ENSG00000136874 | UUGAGGC |
| ENSG00000136875 | CACAAUG |
| ENSG00000136877 | GGAGGAG |
| ENSG00000136878 | GAGGUAU |
| ENSG00000136881 | AAGACAU |
| ENSG00000136881 | UAGACUG |
| ENSG00000136888 | UAAUGCU |
| ENSG00000136888 | UGGCUGC |

|                 |         |
|-----------------|---------|
| ENSG00000136908 | AAAGCUG |
| ENSG00000136908 | AGCUGCC |
| ENSG00000136928 | AAAAACC |
| ENSG00000136928 | AAAGUGC |
| ENSG00000136928 | AAGUGCA |
| ENSG00000136928 | AAUACUG |
| ENSG00000136928 | ACAUUAC |
| ENSG00000136928 | AGCCCUU |
| ENSG00000136928 | AGCUGCC |
| ENSG00000136928 | AGGCAGG |
| ENSG00000136928 | AUUCAUU |
| ENSG00000136928 | CACAGUG |
| ENSG00000136928 | CACUGUU |
| ENSG00000136928 | CAGUCCA |
| ENSG00000136928 | CCUGCUG |
| ENSG00000136928 | CUCUGGG |
| ENSG00000136928 | CUUGGGC |
| ENSG00000136928 | CUUUGGU |
| ENSG00000136928 | GAGGUAG |
| ENSG00000136928 | GGAAGCC |
| ENSG00000136928 | GGAAUGU |
| ENSG00000136928 | GGCAGUG |
| ENSG00000136928 | GGCCCUG |
| ENSG00000136928 | GGGCCCC |
| ENSG00000136928 | GUGAGGU |
| ENSG00000136928 | UAUUGCU |
| ENSG00000136928 | UCCAGUU |
| ENSG00000136928 | UCCCUUG |
| ENSG00000136928 | UCUGGAA |
| ENSG00000136928 | UGAAAUG |
| ENSG00000136928 | UGAAGCU |
| ENSG00000136928 | UUGGUCC |
| ENSG00000136928 | UUGUGUC |
| ENSG00000136928 | UUUGCAC |
| ENSG00000136931 | AAUUGCU |
| ENSG00000136931 | CAGGCUC |
| ENSG00000136931 | GGCUCAG |
| ENSG00000136935 | AAUACUG |
| ENSG00000136935 | ACUGCAU |
| ENSG00000136935 | GCACCAU |
| ENSG00000136935 | GGUUUAC |
| ENSG00000136935 | GUAGUGU |
| ENSG00000136935 | UACAGUU |
| ENSG00000136935 | UCACAGG |
| ENSG00000136935 | UCACAGU |
| ENSG00000136937 | AAAGUUU |
| ENSG00000136937 | AGCAUUC |
| ENSG00000136937 | GGAAUGU |
| ENSG00000136937 | GUGCCUG |
| ENSG00000136938 | AAAGUAA |
| ENSG00000136938 | GGAAUGU |
| ENSG00000136940 | ACAGUAU |
| ENSG00000136940 | GAGACCU |
| ENSG00000136940 | GCUUCCU |
| ENSG00000136940 | GUAAACA |
| ENSG00000136944 | ACAAGGU |
| ENSG00000136944 | ACAGGUG |
| ENSG00000136944 | AGGACAC |
| ENSG00000136944 | AUGGCUU |
| ENSG00000136944 | CACAGUG |
| ENSG00000136944 | CUCUGGG |
| ENSG00000136944 | CUGGCUC |
| ENSG00000136944 | GAGUGUG |
| ENSG00000136944 | GGAAGCC |

|                 |          |
|-----------------|----------|
| ENSG00000136944 | GGCAGGG  |
| ENSG00000136944 | GGCGGGG  |
| ENSG00000136944 | GGGGUGG  |
| ENSG00000136944 | GGGUGGU  |
| ENSG00000136944 | GUGUGGC  |
| ENSG00000136944 | UACAAAG  |
| ENSG00000136944 | UGGCUGC  |
| ENSG00000136944 | UUCCAUA  |
| ENSG00000136944 | UUCUGCA  |
| ENSG00000136986 | UACAAAG  |
| ENSG00000136986 | UGAGAAU  |
| ENSG00000136999 | UCCUGAG  |
| ENSG00000137033 | ACUUGGA  |
| ENSG00000137033 | GGUUGAC  |
| ENSG00000137033 | UAUGGUU  |
| ENSG00000137040 | AAAGUGC  |
| ENSG00000137054 | CUGGCUC  |
| ENSG00000137055 | AGUGCAA  |
| ENSG00000137055 | GUGCAA   |
| ENSG00000137055 | UCACAGU  |
| ENSG00000137070 | ACCAGCA  |
| ENSG00000137070 | CACCAGC  |
| ENSG00000137073 | GACAACU  |
| ENSG00000137073 | UACAAAG  |
| ENSG00000137073 | UCACAUU  |
| ENSG00000137075 | ACAGUAU  |
| ENSG00000137075 | ACAUCAC  |
| ENSG00000137075 | AGUGUGC  |
| ENSG00000137075 | AUCAUAC  |
| ENSG00000137075 | CAA AUGC |
| ENSG00000137075 | CCAGUGU  |
| ENSG00000137075 | CUAGUAA  |
| ENSG00000137075 | CUUUGGU  |
| ENSG00000137075 | GACCCUG  |
| ENSG00000137075 | GAGGUAG  |
| ENSG00000137075 | GAGGUAU  |
| ENSG00000137075 | GCUGGUG  |
| ENSG00000137075 | GGAAUGU  |
| ENSG00000137075 | GGUUACC  |
| ENSG00000137075 | GUAGUGU  |
| ENSG00000137075 | GUGCAA   |
| ENSG00000137075 | GUGCUUG  |
| ENSG00000137075 | UAUUGCU  |
| ENSG00000137075 | UCACAGU  |
| ENSG00000137075 | UGUGCUU  |
| ENSG00000137075 | UUGGAGG  |
| ENSG00000137075 | UUGGUUC  |
| ENSG00000137076 | AAGGCAC  |
| ENSG00000137076 | AAUACUG  |
| ENSG00000137076 | AGCAGCG  |
| ENSG00000137076 | UAAUACA  |
| ENSG00000137090 | AAAUUUC  |
| ENSG00000137090 | AACAUUC  |
| ENSG00000137090 | UCUCAAG  |
| ENSG00000137094 | AAAAACC  |
| ENSG00000137094 | AACAUUC  |
| ENSG00000137094 | AACCGU   |
| ENSG00000137094 | ACUGGAU  |
| ENSG00000137094 | AGCUGCC  |
| ENSG00000137094 | CCCCUGG  |
| ENSG00000137094 | GAGAAAU  |
| ENSG00000137094 | GUCAUUG  |
| ENSG00000137094 | UACAAAG  |
| ENSG00000137094 | UAUUGCU  |

|                 |         |
|-----------------|---------|
| ENSG00000137094 | UCAAGUA |
| ENSG00000137101 | AAAACUG |
| ENSG00000137101 | AAUUAUU |
| ENSG00000137101 | CUGGCUC |
| ENSG00000137101 | GCCUGGA |
| ENSG00000137101 | GCCUGGG |
| ENSG00000137135 | AAAGCUG |
| ENSG00000137135 | GGGAGCU |
| ENSG00000137135 | UCUGGAA |
| ENSG00000137135 | UGACCUA |
| ENSG00000137145 | GUGCAA  |
| ENSG00000137145 | UCAUGAU |
| ENSG00000137145 | UCCACA  |
| ENSG00000137166 | AAAGUUU |
| ENSG00000137166 | ACAGGUG |
| ENSG00000137166 | ACAGUAC |
| ENSG00000137166 | AGGGAGG |
| ENSG00000137166 | AUGUGGG |
| ENSG00000137166 | CACAGUG |
| ENSG00000137166 | CCCCAG  |
| ENSG00000137166 | CCUGCUG |
| ENSG00000137166 | CUUCUCU |
| ENSG00000137166 | GAGCCCC |
| ENSG00000137166 | GAGUCUU |
| ENSG00000137166 | GCCUGGG |
| ENSG00000137166 | GCGGGUG |
| ENSG00000137166 | GCUGGUG |
| ENSG00000137166 | GCUUCCU |
| ENSG00000137166 | GGCGACA |
| ENSG00000137166 | GGGCCCC |
| ENSG00000137166 | GGGGUCC |
| ENSG00000137166 | GGUGGUC |
| ENSG00000137166 | GGUGGUU |
| ENSG00000137166 | GGUUUAC |
| ENSG00000137166 | GUAAACA |
| ENSG00000137166 | UAAUAUC |
| ENSG00000137166 | UAGAGGA |
| ENSG00000137166 | UAUUGCU |
| ENSG00000137166 | UCACAGG |
| ENSG00000137166 | UCACAGU |
| ENSG00000137166 | UCUCACC |
| ENSG00000137166 | UGCAGCU |
| ENSG00000137166 | UGGCCAC |
| ENSG00000137166 | UCCGGC  |
| ENSG00000137166 | UUGGUCC |
| ENSG00000137166 | UUGGUUC |
| ENSG00000137166 | UUUUUGC |
| ENSG00000137168 | UUGACAC |
| ENSG00000137168 | UUGGCAC |
| ENSG00000137177 | GUGCAA  |
| ENSG00000137193 | AGCAGCA |
| ENSG00000137193 | GGCUCAG |
| ENSG00000137193 | UCUGGAA |
| ENSG00000137198 | AUAUUAU |
| ENSG00000137198 | GGGCCCC |
| ENSG00000137203 | AAAGAAU |
| ENSG00000137203 | AAAGCGC |
| ENSG00000137203 | AAAGUAA |
| ENSG00000137203 | AAGACAU |
| ENSG00000137203 | ACUGUAG |
| ENSG00000137203 | AUUGCAC |
| ENSG00000137203 | CACAAUG |
| ENSG00000137203 | CAGCUGG |
| ENSG00000137203 | GCCUGGG |

|                 |         |
|-----------------|---------|
| ENSG00000137203 | GCUACAU |
| ENSG00000137203 | GGGUAAG |
| ENSG00000137203 | UCAAGUA |
| ENSG00000137203 | UCACAAG |
| ENSG00000137203 | UCCCUUG |
| ENSG00000137203 | UCCCUUU |
| ENSG00000137203 | UGAAAGG |
| ENSG00000137204 | AAUGUUG |
| ENSG00000137204 | GGAUGAG |
| ENSG00000137216 | AAUUAUU |
| ENSG00000137216 | CUCCAGC |
| ENSG00000137216 | GGCUCUG |
| ENSG00000137216 | GUGCAAA |
| ENSG00000137216 | UGGGGGA |
| ENSG00000137218 | AAAAAUC |
| ENSG00000137218 | AAACUGU |
| ENSG00000137218 | AAUUAUU |
| ENSG00000137218 | CACAGUG |
| ENSG00000137218 | UCACAGG |
| ENSG00000137218 | UCACAGU |
| ENSG00000137221 | AAAUUUC |
| ENSG00000137221 | AGUAACA |
| ENSG00000137221 | CUGGGGG |
| ENSG00000137221 | GUAACAG |
| ENSG00000137221 | UCCAGAG |
| ENSG00000137221 | UCUAGAG |
| ENSG00000137259 | AAAGAGC |
| ENSG00000137261 | GAGCCCU |
| ENSG00000137265 | AGCAGCA |
| ENSG00000137265 | GAGAAAU |
| ENSG00000137265 | UCACAGG |
| ENSG00000137265 | UCCCUUG |
| ENSG00000137266 | AAGUCUU |
| ENSG00000137266 | GUAAACA |
| ENSG00000137267 | AGCACCA |
| ENSG00000137269 | AAAAGUA |
| ENSG00000137269 | AAAGUAU |
| ENSG00000137269 | ACAGUAC |
| ENSG00000137269 | ACAGUAU |
| ENSG00000137269 | AGAUAAA |
| ENSG00000137269 | AGCUGCC |
| ENSG00000137269 | AUACAAG |
| ENSG00000137269 | AUGGCAC |
| ENSG00000137269 | CUAUACA |
| ENSG00000137269 | GGAAGAC |
| ENSG00000137273 | AAACUGU |
| ENSG00000137273 | AAAGUAU |
| ENSG00000137273 | AAGUGCU |
| ENSG00000137273 | AAUACUG |
| ENSG00000137273 | GAGUAUU |
| ENSG00000137273 | GGUAGAC |
| ENSG00000137275 | CAAAACU |
| ENSG00000137285 | AGCACCA |
| ENSG00000137285 | AGGACAC |
| ENSG00000137285 | GACCAUG |
| ENSG00000137309 | AGCAGCA |
| ENSG00000137309 | AGGUAGU |
| ENSG00000137309 | CAGCAGG |
| ENSG00000137309 | CUGCAGC |
| ENSG00000137309 | GAGGUAG |
| ENSG00000137309 | GCAGCAU |
| ENSG00000137309 | UCCAGAG |
| ENSG00000137310 | CUCCAUU |
| ENSG00000137310 | CUUUGGU |

|                 |          |
|-----------------|----------|
| ENSG00000137310 | GGCAGGG  |
| ENSG00000137310 | UGGCCAC  |
| ENSG00000137310 | UUGGCAA  |
| ENSG00000137310 | UUGGCAC  |
| ENSG00000137312 | AAGGCAC  |
| ENSG00000137331 | GAGUUGA  |
| ENSG00000137331 | GUAGUGU  |
| ENSG00000137343 | AACACUG  |
| ENSG00000137343 | AAUCUCA  |
| ENSG00000137343 | AGUGUGC  |
| ENSG00000137343 | CAAAGCA  |
| ENSG00000137343 | CUCACAC  |
| ENSG00000137343 | CUCCCAA  |
| ENSG00000137343 | CUUCUCU  |
| ENSG00000137343 | GACCCUG  |
| ENSG00000137343 | GAGUGUG  |
| ENSG00000137343 | GGGAGCU  |
| ENSG00000137343 | GUGCUUG  |
| ENSG00000137343 | UACAAAG  |
| ENSG00000137343 | UCACAAAG |
| ENSG00000137343 | UCCUGU   |
| ENSG00000137343 | UGUGCUU  |
| ENSG00000137343 | UUGGCAC  |
| ENSG00000137393 | AGCACCA  |
| ENSG00000137393 | AGCAGCG  |
| ENSG00000137393 | AGUGCCU  |
| ENSG00000137393 | CCCCUGG  |
| ENSG00000137393 | CCCUGAG  |
| ENSG00000137393 | CUGGACU  |
| ENSG00000137393 | GAGGCAG  |
| ENSG00000137393 | UUCUAAU  |
| ENSG00000137393 | UUGGCAA  |
| ENSG00000137404 | CCCUGAG  |
| ENSG00000137409 | CAAAGCA  |
| ENSG00000137409 | GUAGUGU  |
| ENSG00000137409 | UACAAAG  |
| ENSG00000137413 | CAAUUGC  |
| ENSG00000137413 | CCUUCUG  |
| ENSG00000137413 | CCUUCUU  |
| ENSG00000137414 | AAAGUAU  |
| ENSG00000137414 | AACACUG  |
| ENSG00000137414 | AUCACUA  |
| ENSG00000137414 | CUUUGGU  |
| ENSG00000137414 | GGCAUUG  |
| ENSG00000137414 | UACAAAG  |
| ENSG00000137414 | UCUGGAG  |
| ENSG00000137414 | UUAGAGA  |
| ENSG00000137414 | UCCAUA   |
| ENSG00000137414 | UUGGCAA  |
| ENSG00000137414 | UUGGCAC  |
| ENSG00000137449 | AAAACUG  |
| ENSG00000137449 | AAAGAAU  |
| ENSG00000137449 | AAAUUUC  |
| ENSG00000137449 | AAGUGCA  |
| ENSG00000137449 | AAGUGCU  |
| ENSG00000137449 | AAGUGUG  |
| ENSG00000137449 | AAUCUCU  |
| ENSG00000137449 | ACAAUAU  |
| ENSG00000137449 | ACAGUAC  |
| ENSG00000137449 | ACAGUAU  |
| ENSG00000137449 | ACCUGGA  |
| ENSG00000137449 | AGCAGCG  |
| ENSG00000137449 | AGCAGCU  |
| ENSG00000137449 | AGGGUUG  |

|                 |         |
|-----------------|---------|
| ENSG00000137449 | AGUGCAA |
| ENSG00000137449 | AGUGUGC |
| ENSG00000137449 | AUACAAG |
| ENSG00000137449 | AUAUAAC |
| ENSG00000137449 | AUGACAC |
| ENSG00000137449 | AUGCACC |
| ENSG00000137449 | AUGGCAC |
| ENSG00000137449 | CAAAACU |
| ENSG00000137449 | CACAGGG |
| ENSG00000137449 | CACUGUU |
| ENSG00000137449 | CAGCAGA |
| ENSG00000137449 | CAGUCUG |
| ENSG00000137449 | CAUAUUG |
| ENSG00000137449 | CAUGGGU |
| ENSG00000137449 | CCAGUAC |
| ENSG00000137449 | CCUUCUG |
| ENSG00000137449 | CUCCAUI |
| ENSG00000137449 | CUUCACC |
| ENSG00000137449 | GAAAACA |
| ENSG00000137449 | GAGAUGA |
| ENSG00000137449 | GAUUGUC |
| ENSG00000137449 | GCAACUU |
| ENSG00000137449 | GCAGAAG |
| ENSG00000137449 | GGAAGAC |
| ENSG00000137449 | GGAGAGA |
| ENSG00000137449 | GGAUUUC |
| ENSG00000137449 | GGCAGCG |
| ENSG00000137449 | GGCAGGG |
| ENSG00000137449 | GGCAGUG |
| ENSG00000137449 | GGCAUUG |
| ENSG00000137449 | GGCUGCG |
| ENSG00000137449 | GUAAACA |
| ENSG00000137449 | GUGACUG |
| ENSG00000137449 | UCAAGUA |
| ENSG00000137449 | UCUCCAA |
| ENSG00000137449 | UCUGGAA |
| ENSG00000137449 | UCUGGAG |
| ENSG00000137449 | UCUUGAG |
| ENSG00000137449 | UGAAGUG |
| ENSG00000137449 | UGACUGU |
| ENSG00000137449 | UGAGGAC |
| ENSG00000137449 | UGCAAAG |
| ENSG00000137449 | UGGAUAA |
| ENSG00000137449 | UGUGCUU |
| ENSG00000137449 | UUAUGCA |
| ENSG00000137449 | UUCCAUU |
| ENSG00000137449 | UUCUCUG |
| ENSG00000137449 | UUGAGGC |
| ENSG00000137449 | UUGGUUC |
| ENSG00000137460 | AAAGGUA |
| ENSG00000137460 | AAAUGGU |
| ENSG00000137460 | AAGUCUU |
| ENSG00000137460 | AAUUAUU |
| ENSG00000137460 | AGCAGCA |
| ENSG00000137460 | AGCAGCG |
| ENSG00000137460 | AGCAGCU |
| ENSG00000137460 | CACAGGG |
| ENSG00000137460 | UCACACA |
| ENSG00000137460 | UCUCCAA |
| ENSG00000137460 | UGCCAGC |
| ENSG00000137474 | CUGCAGG |
| ENSG00000137474 | UGCCUG  |
| ENSG00000137474 | UUAUGCA |
| ENSG00000137478 | AAGGCAC |



|                 |         |
|-----------------|---------|
| ENSG00000137478 | AAGGUGC |
| ENSG00000137478 | ACUGUAG |
| ENSG00000137478 | AGCAGCA |
| ENSG00000137478 | AGCAGCG |
| ENSG00000137478 | GAUUGUA |
| ENSG00000137478 | GAUUGUC |
| ENSG00000137478 | UGCAAAG |
| ENSG00000137478 | UGUGCUU |
| ENSG00000137486 | GCUGGUG |
| ENSG00000137486 | GGUAGAC |
| ENSG00000137486 | UGAGAAU |
| ENSG00000137491 | AACCUGG |
| ENSG00000137491 | UCCUGAG |
| ENSG00000137492 | AUACAAG |
| ENSG00000137492 | GGAAUGU |
| ENSG00000137492 | GUAAACA |
| ENSG00000137494 | AGGACAC |
| ENSG00000137494 | CUGCUCU |
| ENSG00000137494 | GAGUUGG |
| ENSG00000137497 | AACAUUC |
| ENSG00000137497 | AAGGCAC |
| ENSG00000137497 | GAGCUGC |
| ENSG00000137497 | GCCCUUA |
| ENSG00000137497 | GCCUGGG |
| ENSG00000137497 | GGGAGCU |
| ENSG00000137500 | UUUCAAC |
| ENSG00000137501 | AGCAGCA |
| ENSG00000137502 | AAAGUGC |
| ENSG00000137502 | GAAGGUC |
| ENSG00000137502 | GUGCCUG |
| ENSG00000137502 | UUGGUCC |
| ENSG00000137504 | AAAGAGC |
| ENSG00000137504 | AAAGAGG |
| ENSG00000137504 | AACAAAC |
| ENSG00000137504 | AACCUGG |
| ENSG00000137504 | AAGUCAC |
| ENSG00000137504 | AAGUGCA |
| ENSG00000137504 | ACCAGCA |
| ENSG00000137504 | ACCCAUU |
| ENSG00000137504 | ACUCAGC |
| ENSG00000137504 | ACUGCAG |
| ENSG00000137504 | ACUGCAU |
| ENSG00000137504 | ACUUGGA |
| ENSG00000137504 | AGCAGCA |
| ENSG00000137504 | AGCAGCU |
| ENSG00000137504 | AGUAGAC |
| ENSG00000137504 | AUCAUAC |
| ENSG00000137504 | AUGACAC |
| ENSG00000137504 | CAGCAGG |
| ENSG00000137504 | CAGCUGG |
| ENSG00000137504 | CAGUAGA |
| ENSG00000137504 | CAGUAGU |
| ENSG00000137504 | CAGUCCA |
| ENSG00000137504 | CAGUUAC |
| ENSG00000137504 | CCCGUCC |
| ENSG00000137504 | CUCUUCC |
| ENSG00000137504 | CUGCCCC |
| ENSG00000137504 | CUUCACC |
| ENSG00000137504 | CUUUGGU |
| ENSG00000137504 | GAAACAU |
| ENSG00000137504 | GACCAUG |
| ENSG00000137504 | GAGAAGA |
| ENSG00000137504 | GAGAUGA |
| ENSG00000137504 | GAGCCCC |

|                 |          |
|-----------------|----------|
| ENSG00000137504 | GAGCCCU  |
| ENSG00000137504 | GAGGGGC  |
| ENSG00000137504 | GCAGAAAG |
| ENSG00000137504 | GCAGGUU  |
| ENSG00000137504 | GCUGGAU  |
| ENSG00000137504 | GCUGGUG  |
| ENSG00000137504 | GGACUGC  |
| ENSG00000137504 | GGCAGGG  |
| ENSG00000137504 | GGGAACG  |
| ENSG00000137504 | GGUUUAC  |
| ENSG00000137504 | GUCAGUU  |
| ENSG00000137504 | GUCAUUG  |
| ENSG00000137504 | GUGCAA   |
| ENSG00000137504 | GUGGCC   |
| ENSG00000137504 | UAGGUU   |
| ENSG00000137504 | UAUUACC  |
| ENSG00000137504 | UCACAAG  |
| ENSG00000137504 | UCAUACA  |
| ENSG00000137504 | UCAUUCG  |
| ENSG00000137504 | UGCAGCU  |
| ENSG00000137504 | UGCAUUG  |
| ENSG00000137504 | UGGACUG  |
| ENSG00000137504 | UGUGCUU  |
| ENSG00000137504 | UUAGAGA  |
| ENSG00000137504 | UUCAAGC  |
| ENSG00000137504 | UUGGUUC  |
| ENSG00000137504 | UUGUGAC  |
| ENSG00000137504 | UUUGCAA  |
| ENSG00000137504 | UUUGCAC  |
| ENSG00000137504 | UUUUUGC  |
| ENSG00000137507 | CAGCUGG  |
| ENSG00000137507 | GAGGCAG  |
| ENSG00000137507 | UACAAAG  |
| ENSG00000137522 | AAGUCAC  |
| ENSG00000137522 | ACUGGCU  |
| ENSG00000137522 | AUUCAUU  |
| ENSG00000137522 | CCAGGAG  |
| ENSG00000137522 | CCCACCG  |
| ENSG00000137522 | CCCACCU  |
| ENSG00000137522 | CCCUGAG  |
| ENSG00000137522 | CUCCAUU  |
| ENSG00000137522 | CUGGCUC  |
| ENSG00000137522 | GAGCCCC  |
| ENSG00000137522 | GAGUCUU  |
| ENSG00000137522 | GGCAGGG  |
| ENSG00000137522 | GGGGUCC  |
| ENSG00000137522 | GUGGCC   |
| ENSG00000137522 | UCCCACA  |
| ENSG00000137522 | UCCCACC  |
| ENSG00000137522 | UCCUGAG  |
| ENSG00000137522 | UGAGAAG  |
| ENSG00000137522 | UGCCUG   |
| ENSG00000137522 | UGCUGAC  |
| ENSG00000137558 | ACCCGUA  |
| ENSG00000137558 | AGAUAAA  |
| ENSG00000137558 | AGCUUUA  |
| ENSG00000137558 | GGUUUAC  |
| ENSG00000137558 | UACAGUU  |
| ENSG00000137571 | AAGGCAC  |
| ENSG00000137571 | GAGGUAG  |
| ENSG00000137571 | GAGGUU   |
| ENSG00000137571 | GUGCUUG  |
| ENSG00000137571 | UCACAGU  |
| ENSG00000137571 | UGCAUUA  |

|                 |         |
|-----------------|---------|
| ENSG00000137573 | AAAGUAU |
| ENSG00000137573 | AAAGUGC |
| ENSG00000137573 | AAGUCUU |
| ENSG00000137573 | AAGUGCA |
| ENSG00000137573 | AGUGGUU |
| ENSG00000137573 | CAAAGUG |
| ENSG00000137573 | CAGCAGG |
| ENSG00000137573 | CAGUGCA |
| ENSG00000137573 | CCAGUGC |
| ENSG00000137573 | CCUUCAU |
| ENSG00000137573 | GAAUUGU |
| ENSG00000137573 | GAGGUAG |
| ENSG00000137573 | GAGGUAU |
| ENSG00000137573 | UAUUGCU |
| ENSG00000137573 | UCCAGUU |
| ENSG00000137573 | UCCUGAG |
| ENSG00000137573 | UCUAGAG |
| ENSG00000137573 | UGCCAGC |
| ENSG00000137575 | AAGGCGC |
| ENSG00000137575 | AUGGCUU |
| ENSG00000137575 | UCACAUU |
| ENSG00000137642 | AAAAAUC |
| ENSG00000137642 | ACUCAAA |
| ENSG00000137642 | CAUAUUG |
| ENSG00000137642 | GCAACUU |
| ENSG00000137656 | CAAAACU |
| ENSG00000137672 | AGCACCA |
| ENSG00000137672 | UCAAGUA |
| ENSG00000137692 | GUAACAG |
| ENSG00000137693 | AGUAGUU |
| ENSG00000137693 | CAGUAGU |
| ENSG00000137693 | GUAACAG |
| ENSG00000137709 | AGAUAAA |
| ENSG00000137709 | AUGGCUU |
| ENSG00000137709 | CACACCG |
| ENSG00000137709 | UCACACA |
| ENSG00000137709 | UUGGCAC |
| ENSG00000137710 | AACUGGU |
| ENSG00000137710 | AAGUGCA |
| ENSG00000137710 | AGGUAGU |
| ENSG00000137710 | AGUGCAA |
| ENSG00000137710 | AGUGCUU |
| ENSG00000137710 | CUGUUGA |
| ENSG00000137710 | GAGGUAG |
| ENSG00000137710 | GAGGUAU |
| ENSG00000137710 | GGCAAGA |
| ENSG00000137710 | GGUGGUC |
| ENSG00000137710 | UAAUAGU |
| ENSG00000137710 | UGUCUGC |
| ENSG00000137710 | UGUUGAA |
| ENSG00000137710 | UUGGCAA |
| ENSG00000137710 | UUGGCAC |
| ENSG00000137710 | UUUCAAC |
| ENSG00000137713 | AAGAACC |
| ENSG00000137713 | AAUCUCA |
| ENSG00000137713 | CCCUGAG |
| ENSG00000137713 | CUGGAAA |
| ENSG00000137713 | GAAGGUC |
| ENSG00000137713 | GGAAUGU |
| ENSG00000137713 | UACAAAG |
| ENSG00000137713 | UCCCAUA |
| ENSG00000137714 | AAUUAUU |
| ENSG00000137714 | UACAAAG |
| ENSG00000137726 | AGGGAGG |

|                 |         |
|-----------------|---------|
| ENSG00000137726 | UAUUGCU |
| ENSG00000137726 | UGCUGAC |
| ENSG00000137727 | AAAAGUA |
| ENSG00000137727 | ACUCAAA |
| ENSG00000137727 | AGCAGCG |
| ENSG00000137727 | AGCAGCU |
| ENSG00000137727 | CAGUAGU |
| ENSG00000137727 | CAGUGCA |
| ENSG00000137727 | GAGGUAG |
| ENSG00000137745 | UCACAGG |
| ENSG00000137745 | UCACAGU |
| ENSG00000137745 | UGAAGCU |
| ENSG00000137747 | GAGUAUU |
| ENSG00000137747 | GCCUGGG |
| ENSG00000137747 | UCCUGU  |
| ENSG00000137764 | CAAAGCA |
| ENSG00000137766 | AACAUUC |
| ENSG00000137766 | AACUGGU |
| ENSG00000137766 | CAUGGAU |
| ENSG00000137766 | CUUCACC |
| ENSG00000137766 | UCACAGG |
| ENSG00000137766 | UCUAGAG |
| ENSG00000137766 | UUUGCAC |
| ENSG00000137770 | AAAGGUA |
| ENSG00000137770 | AAAGUGC |
| ENSG00000137770 | AACAGUC |
| ENSG00000137770 | ACUGGCU |
| ENSG00000137770 | ACUGUAG |
| ENSG00000137770 | AGCAAAA |
| ENSG00000137770 | AGGUUAU |
| ENSG00000137770 | AGUGCCG |
| ENSG00000137770 | AUGCCUU |
| ENSG00000137770 | AUGUAAU |
| ENSG00000137770 | CAGUCUG |
| ENSG00000137770 | CUACAAA |
| ENSG00000137770 | CUGUUGA |
| ENSG00000137770 | CUUCUCU |
| ENSG00000137770 | GAGGUAU |
| ENSG00000137770 | GAUUGUA |
| ENSG00000137770 | GUAAACA |
| ENSG00000137770 | GUGCAAA |
| ENSG00000137770 | GUUAAUG |
| ENSG00000137770 | UCAUUUG |
| ENSG00000137770 | UGAAGCU |
| ENSG00000137770 | UGUUGAA |
| ENSG00000137770 | UUAGAGA |
| ENSG00000137770 | UUGCAUA |
| ENSG00000137770 | UUGCUAG |
| ENSG00000137770 | UUUUUGC |
| ENSG00000137776 | AACAGUC |
| ENSG00000137776 | AAUACUG |
| ENSG00000137776 | ACAGUAC |
| ENSG00000137776 | ACCACAG |
| ENSG00000137776 | ACUCAGC |
| ENSG00000137776 | ACUCAGG |
| ENSG00000137776 | AGGUUAU |
| ENSG00000137776 | AUAAUAC |
| ENSG00000137776 | CCUUCUG |
| ENSG00000137776 | CUAUACA |
| ENSG00000137776 | GAAGGUC |
| ENSG00000137776 | GAGCUAA |
| ENSG00000137776 | UUCUGCA |
| ENSG00000137801 | AAUUAUU |
| ENSG00000137801 | ACAGUAC |

|                 |         |
|-----------------|---------|
| ENSG00000137801 | GAGGUAG |
| ENSG00000137801 | GAGGUAU |
| ENSG00000137801 | UCACACA |
| ENSG00000137802 | AAAAACC |
| ENSG00000137802 | AAAAGUA |
| ENSG00000137802 | AACAGUC |
| ENSG00000137802 | ACCCUGU |
| ENSG00000137802 | AGCACCA |
| ENSG00000137802 | AGCCCUU |
| ENSG00000137802 | AUGGCUU |
| ENSG00000137802 | CAAUUGC |
| ENSG00000137802 | CAGCUGG |
| ENSG00000137802 | CUGCAGC |
| ENSG00000137802 | GCAGAAG |
| ENSG00000137802 | GGAAUGU |
| ENSG00000137802 | GGAGGCA |
| ENSG00000137802 | GGGAGCU |
| ENSG00000137802 | UAUAAAG |
| ENSG00000137802 | UCCACA  |
| ENSG00000137802 | UGCAGCU |
| ENSG00000137802 | UUCAAAU |
| ENSG00000137807 | AAGUCAC |
| ENSG00000137807 | AAGUGCA |
| ENSG00000137807 | AGCAGCG |
| ENSG00000137807 | AGCAGCU |
| ENSG00000137807 | CUUUGGU |
| ENSG00000137809 | AGCACCA |
| ENSG00000137809 | AGCCCUU |
| ENSG00000137809 | GUGCAA  |
| ENSG00000137812 | AAUUUUA |
| ENSG00000137815 | AAAUGGU |
| ENSG00000137815 | AACAGUC |
| ENSG00000137815 | ACUGCAG |
| ENSG00000137815 | AGCAGCA |
| ENSG00000137815 | AGUACUG |
| ENSG00000137815 | CAGCAGG |
| ENSG00000137815 | CUUUGGU |
| ENSG00000137815 | GGCAGUG |
| ENSG00000137815 | UACAAAG |
| ENSG00000137815 | UAUUACC |
| ENSG00000137815 | UCACAUU |
| ENSG00000137815 | UUCUUGU |
| ENSG00000137817 | CAGUCCA |
| ENSG00000137817 | GGGCCCC |
| ENSG00000137817 | UACAAAG |
| ENSG00000137819 | AAACUGU |
| ENSG00000137819 | AAGUGCA |
| ENSG00000137819 | AAUUUUA |
| ENSG00000137819 | ACCAGCA |
| ENSG00000137819 | CAUAUUG |
| ENSG00000137819 | CCUUCAU |
| ENSG00000137819 | GAAAACA |
| ENSG00000137819 | UCACAAG |
| ENSG00000137824 | UUGUUCG |
| ENSG00000137825 | GCAGGAC |
| ENSG00000137831 | AAGGCAC |
| ENSG00000137831 | UCCUAG  |
| ENSG00000137834 | AAAGUGC |
| ENSG00000137834 | AUAUUAU |
| ENSG00000137834 | AUUGCAC |
| ENSG00000137834 | CAAAGUG |
| ENSG00000137842 | AUUCAUU |
| ENSG00000137842 | CAGUAGA |
| ENSG00000137842 | CAGUAGU |

|                 |         |
|-----------------|---------|
| ENSG00000137842 | CAGUCCA |
| ENSG00000137842 | UCAUUUG |
| ENSG00000137843 | AAGUGCA |
| ENSG00000137843 | AAUACUG |
| ENSG00000137843 | AGGCAGG |
| ENSG00000137843 | AGUGCAA |
| ENSG00000137843 | CGGCCUG |
| ENSG00000137843 | CUUUGGU |
| ENSG00000137843 | GAGGCAG |
| ENSG00000137843 | GUCUCUG |
| ENSG00000137843 | GUGGCC  |
| ENSG00000137843 | UCACAAG |
| ENSG00000137843 | UCACAGU |
| ENSG00000137843 | UCCUGU  |
| ENSG00000137843 | UGGAGAU |
| ENSG00000137843 | UGGCCCU |
| ENSG00000137843 | UUGGAGG |
| ENSG00000137845 | AAGAACC |
| ENSG00000137845 | CAUAUUG |
| ENSG00000137845 | CUUUGGU |
| ENSG00000137845 | UCCUGAG |
| ENSG00000137845 | UCUCAA  |
| ENSG00000137845 | UGCAUUA |
| ENSG00000137845 | UUGGCAA |
| ENSG00000137857 | CCAGCAU |
| ENSG00000137871 | ACUGGAU |
| ENSG00000137872 | ACCAGCA |
| ENSG00000137872 | AGCAGCG |
| ENSG00000137872 | AGCAGCU |
| ENSG00000137872 | CACAGUG |
| ENSG00000137872 | CUUUGGU |
| ENSG00000137872 | GUGAAUG |
| ENSG00000137872 | GUGCAAA |
| ENSG00000137872 | UGGAUAA |
| ENSG00000137872 | UUCAAGC |
| ENSG00000137878 | AUGUAAU |
| ENSG00000137878 | GCCUGGG |
| ENSG00000137878 | UAUCAGA |
| ENSG00000137878 | UCUGGAG |
| ENSG00000137878 | UUCUGCA |
| ENSG00000137941 | AGCAAAA |
| ENSG00000137942 | AAAGUGC |
| ENSG00000137942 | AAGGCAC |
| ENSG00000137942 | AAGUGCA |
| ENSG00000137942 | ACUGUAG |
| ENSG00000137942 | AGCCCUU |
| ENSG00000137942 | AUAUAAC |
| ENSG00000137942 | AUGCACC |
| ENSG00000137942 | GCAGCAU |
| ENSG00000137942 | UUGGCAA |
| ENSG00000137944 | AAAAGUA |
| ENSG00000137944 | AAAGUUU |
| ENSG00000137944 | GGUUUAC |
| ENSG00000137944 | UCACAAG |
| ENSG00000137944 | UCACAGG |
| ENSG00000137944 | UGCAAAG |
| ENSG00000137944 | UGGGUGA |
| ENSG00000137944 | UUCUCG  |
| ENSG00000137947 | CUACAAA |
| ENSG00000137947 | GCUACAU |
| ENSG00000137947 | GGAAUGU |
| ENSG00000137959 | CCUUCAU |
| ENSG00000137959 | UUGAGGC |
| ENSG00000137962 | AAGUGCU |

|                 |          |
|-----------------|----------|
| ENSG00000137962 | AUACAAG  |
| ENSG00000137962 | AUGCAUU  |
| ENSG00000137962 | AUGUAAU  |
| ENSG00000137962 | AUUGCAC  |
| ENSG00000137962 | CCAGUGC  |
| ENSG00000137962 | CCAGUGU  |
| ENSG00000137962 | CUCAAAC  |
| ENSG00000137962 | GGCCUG   |
| ENSG00000137962 | UCCUAUA  |
| ENSG00000137962 | UUGGCAC  |
| ENSG00000137962 | UUUGCAA  |
| ENSG00000137992 | AACAUUC  |
| ENSG00000137992 | AGCACCA  |
| ENSG00000137992 | AUAUAAC  |
| ENSG00000137992 | AUCAUAC  |
| ENSG00000137992 | AUUGCAC  |
| ENSG00000137992 | CUGGACU  |
| ENSG00000137992 | CUUUGGU  |
| ENSG00000137992 | GCACCAU  |
| ENSG00000137992 | GCCUGAU  |
| ENSG00000137992 | GUGCCUG  |
| ENSG00000137992 | UAUAAAAG |
| ENSG00000137992 | UCUCCAA  |
| ENSG00000137992 | UGCAAAG  |
| ENSG00000137992 | UGUCUUU  |
| ENSG00000138028 | CUGCAGC  |
| ENSG00000138029 | UCCUAG   |
| ENSG00000138030 | CUCUGGG  |
| ENSG00000138031 | AAAAAUC  |
| ENSG00000138031 | ACUGUAG  |
| ENSG00000138031 | AGCAAAA  |
| ENSG00000138031 | CAAGAGC  |
| ENSG00000138031 | CACAGUG  |
| ENSG00000138032 | AAUACUG  |
| ENSG00000138032 | ACAAUUA  |
| ENSG00000138032 | ACAUCAC  |
| ENSG00000138032 | GAAAACA  |
| ENSG00000138032 | UCAAGUA  |
| ENSG00000138035 | AAACUGU  |
| ENSG00000138036 | AAAACUG  |
| ENSG00000138036 | AAUUGCU  |
| ENSG00000138036 | AAUUUUA  |
| ENSG00000138036 | ACAUCAC  |
| ENSG00000138036 | CCAGUGC  |
| ENSG00000138036 | CCAGUGU  |
| ENSG00000138036 | UAUAAAAG |
| ENSG00000138036 | UCAUUUG  |
| ENSG00000138036 | UCCAGUU  |
| ENSG00000138041 | AAUUUUA  |
| ENSG00000138041 | AGCACCA  |
| ENSG00000138041 | CACCACC  |
| ENSG00000138041 | CAGACAG  |
| ENSG00000138041 | CCAGGAG  |
| ENSG00000138041 | CUACAAA  |
| ENSG00000138041 | GCACCAU  |
| ENSG00000138041 | UCACAUU  |
| ENSG00000138041 | UCCUGAG  |
| ENSG00000138041 | UCUCCAA  |
| ENSG00000138061 | CACAGGG  |
| ENSG00000138061 | UCACAGU  |
| ENSG00000138069 | AAUCUCU  |
| ENSG00000138069 | ACACACC  |
| ENSG00000138069 | ACACACU  |
| ENSG00000138069 | ACAGUAU  |

|                 |          |
|-----------------|----------|
| ENSG00000138069 | ACCAGCA  |
| ENSG00000138069 | AGCAAAA  |
| ENSG00000138069 | AGUGCAA  |
| ENSG00000138069 | AUAU AAC |
| ENSG00000138069 | CUGUUGA  |
| ENSG00000138069 | CUUACAG  |
| ENSG00000138069 | GACCAUG  |
| ENSG00000138069 | GCUACAU  |
| ENSG00000138069 | GCUGUCU  |
| ENSG00000138069 | GGAGGCA  |
| ENSG00000138069 | GUAGUGU  |
| ENSG00000138069 | GUCUUGC  |
| ENSG00000138069 | GUGACAG  |
| ENSG00000138069 | UACAGUU  |
| ENSG00000138069 | UAUAAAAG |
| ENSG00000138069 | UAUAUGA  |
| ENSG00000138069 | UCUUGAG  |
| ENSG00000138069 | UGAGUCU  |
| ENSG00000138069 | UGCAGCU  |
| ENSG00000138069 | UUCUGCA  |
| ENSG00000138071 | ACUUGGA  |
| ENSG00000138071 | AGCAGCG  |
| ENSG00000138071 | AGCAGCU  |
| ENSG00000138071 | CAGACAG  |
| ENSG00000138071 | CCAGCAU  |
| ENSG00000138073 | CAGCAA   |
| ENSG00000138074 | GAGGUAG  |
| ENSG00000138074 | UCCUCU   |
| ENSG00000138080 | UGUCUUU  |
| ENSG00000138081 | AAGUGCU  |
| ENSG00000138081 | ACAAU AU |
| ENSG00000138081 | ACAUUCA  |
| ENSG00000138081 | ACCAU U  |
| ENSG00000138081 | ACUCCAG  |
| ENSG00000138081 | ACUGUUU  |
| ENSG00000138081 | AGAUGUG  |
| ENSG00000138081 | AGCUU AU |
| ENSG00000138081 | AUAUU AU |
| ENSG00000138081 | CAGGCUC  |
| ENSG00000138081 | CAGUGCA  |
| ENSG00000138081 | CAGUUAC  |
| ENSG00000138081 | GACCAUG  |
| ENSG00000138081 | GCAGAA G |
| ENSG00000138081 | GCUAGCA  |
| ENSG00000138081 | GGCAGGG  |
| ENSG00000138081 | UAAUGCU  |
| ENSG00000138081 | UACAAAG  |
| ENSG00000138081 | UAUGGUU  |
| ENSG00000138081 | UCACAUU  |
| ENSG00000138081 | UCCUGAG  |
| ENSG00000138081 | UGAAAUG  |
| ENSG00000138081 | UGGGACA  |
| ENSG00000138081 | UCCAUA   |
| ENSG00000138083 | AAAGU AU |
| ENSG00000138083 | GCAGGUU  |
| ENSG00000138083 | GUGCUUG  |
| ENSG00000138092 | AAAGUGC  |
| ENSG00000138092 | AGUGCAA  |
| ENSG00000138092 | UCCAGAG  |
| ENSG00000138092 | UCUGGAG  |
| ENSG00000138095 | CUGGAAA  |
| ENSG00000138100 | GUCUCUG  |
| ENSG00000138101 | AGCCUGC  |
| ENSG00000138101 | CUCUGGG  |



|                 |         |
|-----------------|---------|
| ENSG00000138101 | GAGAUGA |
| ENSG00000138101 | GGGGGAA |
| ENSG00000138101 | UGGGGGA |
| ENSG00000138107 | AAAGUGC |
| ENSG00000138107 | AACAAAC |
| ENSG00000138107 | AAUACUG |
| ENSG00000138107 | ACUGCAG |
| ENSG00000138107 | AGCAGCA |
| ENSG00000138107 | AGUGGUU |
| ENSG00000138107 | CUUGGGC |
| ENSG00000138107 | CUUUGGU |
| ENSG00000138107 | GGCAGGG |
| ENSG00000138107 | GGCAGUG |
| ENSG00000138107 | GUAAACA |
| ENSG00000138107 | UUGGUCC |
| ENSG00000138111 | AGCCCUU |
| ENSG00000138111 | CAGACAG |
| ENSG00000138111 | CUGCAGC |
| ENSG00000138111 | GGCUCAG |
| ENSG00000138111 | GGGGUGG |
| ENSG00000138131 | AGCACCA |
| ENSG00000138131 | CAAAGCA |
| ENSG00000138131 | GAGGUAG |
| ENSG00000138131 | GAGGUAU |
| ENSG00000138131 | GCUUCCU |
| ENSG00000138131 | UCUCAAG |
| ENSG00000138131 | UUUGCAA |
| ENSG00000138136 | AUUGCAC |
| ENSG00000138136 | UAUUGCU |
| ENSG00000138138 | AGUAGUU |
| ENSG00000138138 | CAGUAGA |
| ENSG00000138138 | CUACAGU |
| ENSG00000138138 | CUUCACC |
| ENSG00000138138 | UCAUGAU |
| ENSG00000138152 | CUGGAAA |
| ENSG00000138160 | AAAUCCC |
| ENSG00000138160 | GAGAAAU |
| ENSG00000138160 | UCCAGAG |
| ENSG00000138162 | AAGGCAC |
| ENSG00000138162 | CAGGAAC |
| ENSG00000138162 | CAGUAGU |
| ENSG00000138162 | GGCAAGA |
| ENSG00000138166 | AAUUAAU |
| ENSG00000138166 | ACAGUAC |
| ENSG00000138166 | ACAGUAU |
| ENSG00000138166 | ACAUUCA |
| ENSG00000138166 | AUGGCUU |
| ENSG00000138166 | CACAGUG |
| ENSG00000138166 | CAGUAGU |
| ENSG00000138166 | CCUUCAU |
| ENSG00000138166 | GGUCUAG |
| ENSG00000138166 | GUGCUUG |
| ENSG00000138166 | UCACAGU |
| ENSG00000138166 | UCUGGAA |
| ENSG00000138166 | UUGGUCC |
| ENSG00000138175 | AAUACUG |
| ENSG00000138175 | AAUCUCA |
| ENSG00000138175 | AAUCUCU |
| ENSG00000138175 | AAUUUUA |
| ENSG00000138175 | ACAUUCA |
| ENSG00000138175 | CAGUUAC |
| ENSG00000138175 | CCCACCG |
| ENSG00000138175 | CCCACCU |
| ENSG00000138175 | CUCCAUI |

|                 |         |
|-----------------|---------|
| ENSG00000138175 | CUCCAC  |
| ENSG00000138175 | GUCAUUG |
| ENSG00000138175 | UAAUACA |
| ENSG00000138175 | UCCACA  |
| ENSG00000138175 | UCCACC  |
| ENSG00000138175 | UGUGCUU |
| ENSG00000138175 | UUAUGCA |
| ENSG00000138175 | UCCAUA  |
| ENSG00000138175 | UUGGUCC |
| ENSG00000138180 | AAAAAUC |
| ENSG00000138180 | AGUGCAA |
| ENSG00000138180 | CAGUGCA |
| ENSG00000138180 | GUGCAA  |
| ENSG00000138185 | AAAUGGU |
| ENSG00000138185 | AAUACUG |
| ENSG00000138185 | AGCAUUC |
| ENSG00000138185 | CUCCAGC |
| ENSG00000138185 | CUCCAUU |
| ENSG00000138185 | GGAGAGA |
| ENSG00000138185 | UCAACAG |
| ENSG00000138185 | UGGGACA |
| ENSG00000138207 | AGAUAAA |
| ENSG00000138246 | AGUGCUU |
| ENSG00000138246 | CACAGUG |
| ENSG00000138246 | GGAGGAG |
| ENSG00000138246 | UCACAGG |
| ENSG00000138246 | UCCCUUG |
| ENSG00000138279 | AAGGCAC |
| ENSG00000138279 | UACAAAG |
| ENSG00000138293 | AAAGAAU |
| ENSG00000138293 | AAGGCAC |
| ENSG00000138293 | ACUCAGC |
| ENSG00000138293 | AGCACCA |
| ENSG00000138293 | AUGCACC |
| ENSG00000138293 | GCACCAU |
| ENSG00000138293 | GUCACUC |
| ENSG00000138293 | UCAAGUA |
| ENSG00000138303 | AGUGCUU |
| ENSG00000138308 | GAAACAU |
| ENSG00000138311 | ACUGGCC |
| ENSG00000138311 | CUUUGGU |
| ENSG00000138311 | UUCAAAU |
| ENSG00000138316 | GAGGUAG |
| ENSG00000138316 | GAGGUAU |
| ENSG00000138316 | GUAAACA |
| ENSG00000138316 | GUGCUUG |
| ENSG00000138316 | UGUGCUU |
| ENSG00000138326 | AAAAAUC |
| ENSG00000138326 | CUCCAGC |
| ENSG00000138336 | AACCUGU |
| ENSG00000138336 | AACUCUA |
| ENSG00000138336 | AGCAGCU |
| ENSG00000138336 | AUCCCUU |
| ENSG00000138336 | AUGCACC |
| ENSG00000138336 | AUGGCAC |
| ENSG00000138336 | CACAGUG |
| ENSG00000138336 | CCUUCAU |
| ENSG00000138336 | CUUGUAU |
| ENSG00000138336 | GAUUGGU |
| ENSG00000138336 | GGCAUUG |
| ENSG00000138336 | GUAAACA |
| ENSG00000138347 | AAUUGCU |
| ENSG00000138347 | CAGCAGG |
| ENSG00000138356 | UAGAGGA |

|                 |          |
|-----------------|----------|
| ENSG00000138380 | AUGUAAU  |
| ENSG00000138380 | UCCAGUU  |
| ENSG00000138386 | AACACUG  |
| ENSG00000138386 | AACUACU  |
| ENSG00000138386 | ACAUUAC  |
| ENSG00000138386 | ACAUUCA  |
| ENSG00000138386 | AGUAGAC  |
| ENSG00000138386 | CAGUGCA  |
| ENSG00000138386 | CCAGUGC  |
| ENSG00000138386 | CUACAGU  |
| ENSG00000138386 | GAGGCAG  |
| ENSG00000138386 | GGAAUGU  |
| ENSG00000138386 | UACAAAG  |
| ENSG00000138386 | UCAUGAU  |
| ENSG00000138386 | UUCAAGC  |
| ENSG00000138398 | AAAACUG  |
| ENSG00000138411 | AAAAAUC  |
| ENSG00000138411 | AAUUAUU  |
| ENSG00000138411 | ACAUUCA  |
| ENSG00000138411 | ACUGUGU  |
| ENSG00000138411 | AGUGCUU  |
| ENSG00000138411 | AUAAAGU  |
| ENSG00000138411 | CUUUGGU  |
| ENSG00000138411 | GAUAUGU  |
| ENSG00000138411 | GUGCAA   |
| ENSG00000138411 | UGGUACC  |
| ENSG00000138413 | GAGUGUG  |
| ENSG00000138413 | UAUUGCU  |
| ENSG00000138413 | UUGGUCC  |
| ENSG00000138430 | AAAGCUG  |
| ENSG00000138430 | AAUCACU  |
| ENSG00000138430 | ACACACC  |
| ENSG00000138430 | ACAGUUA  |
| ENSG00000138430 | ACUGUAG  |
| ENSG00000138430 | ACUGUGU  |
| ENSG00000138430 | AGCUGCC  |
| ENSG00000138430 | AGUACUG  |
| ENSG00000138430 | AUGCAUU  |
| ENSG00000138430 | CAA AUGC |
| ENSG00000138430 | CACUGUU  |
| ENSG00000138430 | CAGGCUC  |
| ENSG00000138430 | CAGUUA   |
| ENSG00000138430 | CUACAAA  |
| ENSG00000138430 | CUGCCCC  |
| ENSG00000138430 | GAGUGUG  |
| ENSG00000138430 | GGGUCUU  |
| ENSG00000138430 | UAUGGUU  |
| ENSG00000138430 | UCAUACA  |
| ENSG00000138430 | UCCUGAG  |
| ENSG00000138430 | UCUGGAG  |
| ENSG00000138430 | UGCAGCU  |
| ENSG00000138430 | UGUGCUU  |
| ENSG00000138430 | UUGGAGG  |
| ENSG00000138430 | UUUUUGC  |
| ENSG00000138434 | AGUAGUU  |
| ENSG00000138434 | AUACCUC  |
| ENSG00000138434 | UUCAAGC  |
| ENSG00000138443 | AAACUGU  |
| ENSG00000138443 | ACAUUAC  |
| ENSG00000138443 | ACUGGCU  |
| ENSG00000138443 | AGUACUG  |
| ENSG00000138443 | AUCCUUG  |
| ENSG00000138443 | AUCCUUU  |
| ENSG00000138443 | AUGGCAC  |

|                 |         |
|-----------------|---------|
| ENSG00000138443 | CUCUGGG |
| ENSG00000138443 | GAGAAAU |
| ENSG00000138443 | GGAAGAC |
| ENSG00000138443 | GGAAUGU |
| ENSG00000138443 | GGAUUUC |
| ENSG00000138443 | UACAAAG |
| ENSG00000138443 | UCAUUCG |
| ENSG00000138443 | UCUGGAG |
| ENSG00000138443 | UGCAAAG |
| ENSG00000138443 | UUGUUCG |
| ENSG00000138448 | ACUCAA  |
| ENSG00000138448 | UGAGAAG |
| ENSG00000138448 | UGGGUGA |
| ENSG00000138449 | AAGUGCA |
| ENSG00000138449 | ACAAUUA |
| ENSG00000138449 | GUAACAG |
| ENSG00000138459 | AAAUUUC |
| ENSG00000138468 | AAAGAAU |
| ENSG00000138468 | AAAUGGU |
| ENSG00000138468 | ACAGUAU |
| ENSG00000138468 | AUUCAUU |
| ENSG00000138468 | GAGAAAU |
| ENSG00000138468 | UAAUAUC |
| ENSG00000138468 | UCAUACA |
| ENSG00000138468 | UGCAAAG |
| ENSG00000138468 | UGCAUAG |
| ENSG00000138468 | UGCAUAU |
| ENSG00000138495 | UAUAAAG |
| ENSG00000138495 | UCAUUCG |
| ENSG00000138496 | AAGGCAC |
| ENSG00000138587 | AGUGGUU |
| ENSG00000138587 | UGACAUC |
| ENSG00000138592 | GUGCAAA |
| ENSG00000138594 | UCCAGUU |
| ENSG00000138594 | UCCCUUG |
| ENSG00000138604 | AAAACUG |
| ENSG00000138604 | AAGGCAC |
| ENSG00000138604 | ACAUUAC |
| ENSG00000138604 | AGCAGCA |
| ENSG00000138604 | AGCAGCG |
| ENSG00000138604 | AUAAAGU |
| ENSG00000138604 | AUUGCAC |
| ENSG00000138604 | CUUGUGU |
| ENSG00000138604 | GAUUGUC |
| ENSG00000138604 | GGAAUGU |
| ENSG00000138604 | GUCAACA |
| ENSG00000138604 | GUGUCAC |
| ENSG00000138604 | UAUUGCU |
| ENSG00000138604 | UCCAUA  |
| ENSG00000138604 | UUGGUUC |
| ENSG00000138606 | CACAGUG |
| ENSG00000138613 | AAGGCAC |
| ENSG00000138614 | CUGGAAA |
| ENSG00000138614 | UCCUGAG |
| ENSG00000138615 | GUGACAG |
| ENSG00000138615 | UUCAAGC |
| ENSG00000138617 | CAAAACU |
| ENSG00000138617 | CCAGGAG |
| ENSG00000138617 | GUAAACA |
| ENSG00000138617 | UGGCCCU |
| ENSG00000138617 | UUUGCAA |
| ENSG00000138622 | AAUCACU |
| ENSG00000138622 | ACCUGGA |
| ENSG00000138622 | CACAGUG |

|                 |         |
|-----------------|---------|
| ENSG00000138622 | CAGUAGA |
| ENSG00000138622 | CCCUGAG |
| ENSG00000138622 | CUAUACA |
| ENSG00000138622 | GACCUGG |
| ENSG00000138622 | GUGCUUG |
| ENSG00000138622 | UCACAGU |
| ENSG00000138623 | UCACAGU |
| ENSG00000138639 | AAAAAUC |
| ENSG00000138639 | AAAGUAU |
| ENSG00000138639 | AACACUG |
| ENSG00000138639 | AACUACU |
| ENSG00000138639 | AAGUGCU |
| ENSG00000138639 | AGCAUUC |
| ENSG00000138639 | AUAUAAC |
| ENSG00000138639 | AUGGAUU |
| ENSG00000138639 | CACAAUG |
| ENSG00000138639 | CAGGUGA |
| ENSG00000138639 | CUUUGGU |
| ENSG00000138639 | UCAUUUG |
| ENSG00000138639 | UCCAGUU |
| ENSG00000138639 | UGAAAGG |
| ENSG00000138639 | UGAAGCU |
| ENSG00000138639 | UGGUACC |
| ENSG00000138639 | UUGGCAC |
| ENSG00000138639 | UUGGUCC |
| ENSG00000138641 | AAUCACU |
| ENSG00000138641 | AUUGCAC |
| ENSG00000138641 | CAGCAGA |
| ENSG00000138641 | UAUUGCU |
| ENSG00000138641 | UGCAUAG |
| ENSG00000138641 | UGCAUUA |
| ENSG00000138650 | ACACACU |
| ENSG00000138650 | ACAGUAC |
| ENSG00000138650 | ACAGUAU |
| ENSG00000138650 | AGUGCUU |
| ENSG00000138650 | AUAAUAC |
| ENSG00000138650 | AUUGCAC |
| ENSG00000138650 | CCUGCUG |
| ENSG00000138650 | CUCAGGG |
| ENSG00000138650 | CUUUGGU |
| ENSG00000138650 | GGCUCAG |
| ENSG00000138650 | UACAGUU |
| ENSG00000138650 | UCACACA |
| ENSG00000138650 | UGAAAUG |
| ENSG00000138650 | UGCAUUG |
| ENSG00000138650 | UGGAGAU |
| ENSG00000138650 | UGUAUAA |
| ENSG00000138650 | UUGAUCA |
| ENSG00000138650 | UUGGAGG |
| ENSG00000138650 | UUUCAAC |
| ENSG00000138650 | UUUGCAA |
| ENSG00000138668 | AAAGAGC |
| ENSG00000138668 | AAGACAU |
| ENSG00000138668 | AAGUUGU |
| ENSG00000138668 | ACAAUAU |
| ENSG00000138668 | ACAUCAC |
| ENSG00000138668 | ACCCUGU |
| ENSG00000138668 | ACGUCAU |
| ENSG00000138668 | AUACAAG |
| ENSG00000138668 | AUGACAC |
| ENSG00000138668 | CAAUUGC |
| ENSG00000138668 | CCCUGUU |
| ENSG00000138668 | CUACAAA |
| ENSG00000138668 | GAGAACC |

|                 |         |
|-----------------|---------|
| ENSG00000138668 | UGCAAAG |
| ENSG00000138669 | AAAAAUC |
| ENSG00000138670 | ACCAGCA |
| ENSG00000138670 | ACUCAAA |
| ENSG00000138670 | AGCAGCG |
| ENSG00000138670 | AGCAGCU |
| ENSG00000138670 | CACAGUG |
| ENSG00000138670 | CAGCAAA |
| ENSG00000138675 | AUGCAUU |
| ENSG00000138675 | CUAUACA |
| ENSG00000138675 | CUUUGGU |
| ENSG00000138675 | GAGGUAG |
| ENSG00000138675 | GGUUACC |
| ENSG00000138675 | UCAUAGA |
| ENSG00000138675 | UCCUGAG |
| ENSG00000138675 | UGAAAUG |
| ENSG00000138688 | CACAGUG |
| ENSG00000138696 | AACAAAC |
| ENSG00000138696 | ACAGUAC |
| ENSG00000138696 | AGUACUG |
| ENSG00000138696 | AGUGCAA |
| ENSG00000138696 | AUAUUAU |
| ENSG00000138696 | CCCUGAG |
| ENSG00000138696 | CUGCCCC |
| ENSG00000138696 | GGCUCAG |
| ENSG00000138696 | GUAACAG |
| ENSG00000138696 | UCACAUU |
| ENSG00000138696 | UGAAGCU |
| ENSG00000138696 | UGUGCUU |
| ENSG00000138696 | UUGGCAC |
| ENSG00000138696 | UUGUUCG |
| ENSG00000138698 | AGCACCA |
| ENSG00000138698 | CACUGUU |
| ENSG00000138698 | GUGCUUG |
| ENSG00000138698 | UGUGCUU |
| ENSG00000138698 | UUGACAC |
| ENSG00000138722 | AGAUAAA |
| ENSG00000138722 | AGAUGUG |
| ENSG00000138735 | AAAGGUA |
| ENSG00000138735 | AAGGCAC |
| ENSG00000138735 | AAGUUGU |
| ENSG00000138735 | AAUCUCA |
| ENSG00000138735 | ACACACU |
| ENSG00000138735 | ACAUAGA |
| ENSG00000138735 | AGUGCCG |
| ENSG00000138735 | CCAGUGC |
| ENSG00000138735 | UUCUAAU |
| ENSG00000138735 | UUGUUCG |
| ENSG00000138741 | AAAAAUC |
| ENSG00000138741 | AAGACAU |
| ENSG00000138741 | AUAUUAU |
| ENSG00000138741 | CCCUGUC |
| ENSG00000138741 | CUUGGAG |
| ENSG00000138741 | UAUUGCU |
| ENSG00000138741 | UGUGCUU |
| ENSG00000138741 | UUCAAGC |
| ENSG00000138744 | UGCAGCU |
| ENSG00000138757 | AAGGCAC |
| ENSG00000138757 | ACUGCAU |
| ENSG00000138757 | AGCAGCU |
| ENSG00000138757 | AGUAACA |
| ENSG00000138757 | AGUGCAA |
| ENSG00000138757 | CAGCAGA |
| ENSG00000138757 | CAGUAGA |

|                 |         |
|-----------------|---------|
| ENSG00000138757 | GAGGGGC |
| ENSG00000138757 | GAGUGUG |
| ENSG00000138757 | GCACCAU |
| ENSG00000138757 | GCAGCAU |
| ENSG00000138757 | GGAAGAC |
| ENSG00000138757 | GGAAUGU |
| ENSG00000138757 | GGAGGAG |
| ENSG00000138757 | GGAGUGU |
| ENSG00000138757 | GUGCAAA |
| ENSG00000138757 | UCAUACA |
| ENSG00000138757 | UGCAGCU |
| ENSG00000138757 | UGUGUCA |
| ENSG00000138758 | AAGGCAC |
| ENSG00000138758 | ACAUUCA |
| ENSG00000138758 | ACUGCAG |
| ENSG00000138758 | ACUGCAU |
| ENSG00000138758 | ACUGUGU |
| ENSG00000138758 | AGCAGCA |
| ENSG00000138758 | AUACAAG |
| ENSG00000138758 | AUCCUUG |
| ENSG00000138758 | AUGCAUU |
| ENSG00000138758 | CAGGUGA |
| ENSG00000138758 | CCUUCAU |
| ENSG00000138758 | CUCACAC |
| ENSG00000138758 | CUGACUC |
| ENSG00000138758 | GCUGGUG |
| ENSG00000138758 | GGGUAAG |
| ENSG00000138758 | GUAACAG |
| ENSG00000138758 | GUGAAUG |
| ENSG00000138758 | UACAGUU |
| ENSG00000138758 | UCACACA |
| ENSG00000138758 | UCACAGG |
| ENSG00000138758 | UCACAGU |
| ENSG00000138758 | UCCCUGU |
| ENSG00000138758 | UGCAAAG |
| ENSG00000138758 | UGCAGCU |
| ENSG00000138758 | UGCAUAG |
| ENSG00000138758 | UGCCAGC |
| ENSG00000138758 | UGGCUGC |
| ENSG00000138758 | UGGGUAC |
| ENSG00000138758 | UUCUAAU |
| ENSG00000138758 | UUGGCAC |
| ENSG00000138759 | AAAUCCC |
| ENSG00000138759 | AAGAACC |
| ENSG00000138759 | AAGGCAC |
| ENSG00000138759 | ACUCAAA |
| ENSG00000138759 | AGCACCA |
| ENSG00000138759 | AGUGCUU |
| ENSG00000138759 | CAAAGCA |
| ENSG00000138759 | CCCUGAG |
| ENSG00000138759 | CUCCAGC |
| ENSG00000138759 | CUGGAAA |
| ENSG00000138759 | CUGGGGG |
| ENSG00000138759 | GAGCUAA |
| ENSG00000138759 | GAGGCAG |
| ENSG00000138759 | GAGGUAU |
| ENSG00000138759 | GAGUUGG |
| ENSG00000138759 | GCCUGAU |
| ENSG00000138759 | GGAAUGU |
| ENSG00000138759 | GGUUGAC |
| ENSG00000138759 | GUGCUUG |
| ENSG00000138759 | UCCCUUG |
| ENSG00000138760 | AAAAGUA |
| ENSG00000138760 | AACACUG |

|                 |         |
|-----------------|---------|
| ENSG00000138760 | ACCAGCA |
| ENSG00000138760 | ACCCUGU |
| ENSG00000138760 | CAGCAAA |
| ENSG00000138760 | GAUUGUA |
| ENSG00000138760 | GAUUGUC |
| ENSG00000138760 | GGAUUUC |
| ENSG00000138760 | GUGACAG |
| ENSG00000138760 | UACAAAG |
| ENSG00000138760 | UCACAAG |
| ENSG00000138760 | UCACAGG |
| ENSG00000138760 | UGAAAUG |
| ENSG00000138760 | UUGGCAA |
| ENSG00000138764 | AUGGCUU |
| ENSG00000138767 | AAAGCUG |
| ENSG00000138767 | AAAGUGC |
| ENSG00000138767 | AAGUGCA |
| ENSG00000138767 | ACAGGUG |
| ENSG00000138767 | ACAGUAU |
| ENSG00000138767 | ACCAUUA |
| ENSG00000138767 | ACUGUGU |
| ENSG00000138767 | AGCAAAA |
| ENSG00000138767 | AGCAGCG |
| ENSG00000138767 | AGCCCUU |
| ENSG00000138767 | AGCUGCC |
| ENSG00000138767 | AGGCAGG |
| ENSG00000138767 | AGUGCAA |
| ENSG00000138767 | AGUGCCU |
| ENSG00000138767 | AGUGCUG |
| ENSG00000138767 | AUACCUC |
| ENSG00000138767 | AUCACUA |
| ENSG00000138767 | AUCAUAC |
| ENSG00000138767 | AUGCACC |
| ENSG00000138767 | AUGGCAC |
| ENSG00000138767 | CACACCU |
| ENSG00000138767 | CAGGAAC |
| ENSG00000138767 | CCAGUAC |
| ENSG00000138767 | CCAGUGU |
| ENSG00000138767 | CUAUACA |
| ENSG00000138767 | GAGGAUA |
| ENSG00000138767 | GAGGUAG |
| ENSG00000138767 | GAGGUAU |
| ENSG00000138767 | GCAGCAU |
| ENSG00000138767 | GCAGGAC |
| ENSG00000138767 | GCCUGAU |
| ENSG00000138767 | GGCAGCG |
| ENSG00000138767 | GGCAGUG |
| ENSG00000138767 | GGGGCAG |
| ENSG00000138767 | GUGCUUG |
| ENSG00000138767 | UAUUGCU |
| ENSG00000138767 | UCAACAG |
| ENSG00000138767 | UCACAGG |
| ENSG00000138767 | UCAUACA |
| ENSG00000138767 | UCCAGAG |
| ENSG00000138767 | UCCAGUU |
| ENSG00000138767 | UGAAAGG |
| ENSG00000138767 | UGCAAAG |
| ENSG00000138767 | UGCAUUA |
| ENSG00000138767 | UGCUCAC |
| ENSG00000138767 | UUGACAC |
| ENSG00000138767 | UUGGCAA |
| ENSG00000138767 | UUGGCAC |
| ENSG00000138769 | AAUCUCU |
| ENSG00000138769 | ACAUUCA |
| ENSG00000138769 | AGCACCA |



|                 |          |
|-----------------|----------|
| ENSG00000138771 | AGCAGCA  |
| ENSG00000138771 | CUCAAAC  |
| ENSG00000138771 | CUUUGGU  |
| ENSG00000138771 | GAAGGAA  |
| ENSG00000138771 | UCACAAG  |
| ENSG00000138771 | UCCUGAG  |
| ENSG00000138780 | AAAAGUA  |
| ENSG00000138780 | AAUCACU  |
| ENSG00000138780 | ACCAGCA  |
| ENSG00000138780 | GAUCAGA  |
| ENSG00000138780 | GCAGCAU  |
| ENSG00000138792 | AAAGCUG  |
| ENSG00000138792 | AGUACUG  |
| ENSG00000138792 | CAAGAGC  |
| ENSG00000138792 | GUGAAUG  |
| ENSG00000138792 | UCACAGG  |
| ENSG00000138792 | UCACAGU  |
| ENSG00000138795 | AAGUGCU  |
| ENSG00000138795 | ACUCAA   |
| ENSG00000138795 | AGUGCUG  |
| ENSG00000138795 | CUCAAAC  |
| ENSG00000138795 | CUCCAGC  |
| ENSG00000138795 | GAUUGUA  |
| ENSG00000138796 | AAGGCAC  |
| ENSG00000138814 | AAAAAUC  |
| ENSG00000138814 | AACAGUC  |
| ENSG00000138814 | ACAAGGU  |
| ENSG00000138814 | ACAAUUAU |
| ENSG00000138814 | ACCCGUA  |
| ENSG00000138814 | AGCUUAU  |
| ENSG00000138814 | AGGCAGG  |
| ENSG00000138814 | AGUAACA  |
| ENSG00000138814 | AUAAAGU  |
| ENSG00000138814 | AUGCACC  |
| ENSG00000138814 | AUGCAUU  |
| ENSG00000138814 | CAAAGCA  |
| ENSG00000138814 | CAGCAAA  |
| ENSG00000138814 | CCAGUAC  |
| ENSG00000138814 | CUACAAA  |
| ENSG00000138814 | CUUGGGC  |
| ENSG00000138814 | GCACCAU  |
| ENSG00000138814 | GGCAAGA  |
| ENSG00000138814 | GUAAACA  |
| ENSG00000138814 | GUAGUGU  |
| ENSG00000138814 | GUCUUGC  |
| ENSG00000138814 | GUUCAUG  |
| ENSG00000138814 | UAAUAUC  |
| ENSG00000138814 | UACAGUU  |
| ENSG00000138814 | UAUAAAG  |
| ENSG00000138814 | UCACAAG  |
| ENSG00000138814 | UCACAUU  |
| ENSG00000138814 | UGCAUAG  |
| ENSG00000138814 | UUCAAAU  |
| ENSG00000138814 | UUCAAGC  |
| ENSG00000138814 | UUGGCAA  |
| ENSG00000138814 | UUGGCAC  |
| ENSG00000138814 | UUUCAAC  |
| ENSG00000138814 | UUUGCAA  |
| ENSG00000138821 | AAAGGUA  |
| ENSG00000138823 | AUGUAAU  |
| ENSG00000138823 | GUAAACA  |
| ENSG00000138823 | UACAAAG  |
| ENSG00000138829 | AGCUGCC  |
| ENSG00000138829 | AUUGCAC  |

|                 |          |
|-----------------|----------|
| ENSG00000138829 | UAUUGCU  |
| ENSG00000138829 | UUGGUCC  |
| ENSG00000138834 | AAAGCUG  |
| ENSG00000138834 | ACAUCAC  |
| ENSG00000138834 | CACAGUG  |
| ENSG00000138834 | CUUCUCU  |
| ENSG00000138834 | GAGAAAU  |
| ENSG00000138834 | GGCGGGG  |
| ENSG00000138834 | GGGAGCU  |
| ENSG00000138834 | GUGCUUG  |
| ENSG00000138834 | UAUUACC  |
| ENSG00000138834 | UCACAGU  |
| ENSG00000138834 | UCCUGAG  |
| ENSG00000138834 | UGUGCUU  |
| ENSG00000138835 | CGUACCG  |
| ENSG00000138835 | UCCUAUA  |
| ENSG00000138835 | UUCCUAG  |
| ENSG00000138867 | AAAGUAC  |
| ENSG00000138867 | AAGGCAC  |
| ENSG00000138867 | AGUGGUU  |
| ENSG00000138867 | AUCCCUU  |
| ENSG00000138867 | UACAAAG  |
| ENSG00000138867 | UCCCUUU  |
| ENSG00000138867 | UCCUGAG  |
| ENSG00000138942 | AACACUG  |
| ENSG00000138942 | AUCCCUU  |
| ENSG00000138942 | GUCUCUG  |
| ENSG00000138942 | GUGGGGA  |
| ENSG00000138942 | UAGUGAG  |
| ENSG00000138942 | UCACAAG  |
| ENSG00000138942 | UCCCUUU  |
| ENSG00000139055 | ACUUGGA  |
| ENSG00000139083 | ACUGGCC  |
| ENSG00000139083 | AUGUAAU  |
| ENSG00000139083 | CACACCU  |
| ENSG00000139083 | CAGCUGG  |
| ENSG00000139083 | CAGUCCA  |
| ENSG00000139083 | CCAGUGU  |
| ENSG00000139083 | GAAAACA  |
| ENSG00000139083 | GAGAAAU  |
| ENSG00000139083 | GCAACUU  |
| ENSG00000139083 | GCAGCAU  |
| ENSG00000139083 | GCUGUCU  |
| ENSG00000139083 | GGUGGGC  |
| ENSG00000139083 | GUCUGCC  |
| ENSG00000139083 | UAUAAAAG |
| ENSG00000139083 | UAUAAUA  |
| ENSG00000139083 | UCCUGAG  |
| ENSG00000139083 | UGCAAAG  |
| ENSG00000139083 | UGGCCCU  |
| ENSG00000139083 | UGUCUGC  |
| ENSG00000139112 | AAUUAUU  |
| ENSG00000139112 | AGCAAAA  |
| ENSG00000139112 | AGCAGCG  |
| ENSG00000139112 | CAGCUGG  |
| ENSG00000139112 | GAGAUGA  |
| ENSG00000139112 | UUGGUCC  |
| ENSG00000139116 | ACAUAGA  |
| ENSG00000139116 | AGCAGCG  |
| ENSG00000139116 | AGCAGCU  |
| ENSG00000139116 | CUUUGGU  |
| ENSG00000139116 | UACAAAG  |
| ENSG00000139116 | UCCUGAG  |
| ENSG00000139116 | UUGGUCC  |

|                 |         |
|-----------------|---------|
| ENSG00000139117 | GUGCUUG |
| ENSG00000139117 | UAUUGCU |
| ENSG00000139131 | UGAGAAG |
| ENSG00000139132 | AUAAAGU |
| ENSG00000139132 | GGAAUGU |
| ENSG00000139146 | AAAGUGC |
| ENSG00000139146 | AAAGUUU |
| ENSG00000139146 | AAGUGCA |
| ENSG00000139146 | AAUACUG |
| ENSG00000139146 | AAUGCCC |
| ENSG00000139146 | ACACACU |
| ENSG00000139146 | ACUGCAU |
| ENSG00000139146 | AGCAGCA |
| ENSG00000139146 | AGCAUUC |
| ENSG00000139146 | CAAAGUG |
| ENSG00000139146 | CAGUAGA |
| ENSG00000139146 | CUGCAGC |
| ENSG00000139146 | GAAUUGU |
| ENSG00000139146 | GAGAUGA |
| ENSG00000139146 | GCAGCAU |
| ENSG00000139146 | GGCAAGA |
| ENSG00000139146 | GGUCUAG |
| ENSG00000139146 | UAAGACU |
| ENSG00000139146 | UCCAGAG |
| ENSG00000139146 | UGAUCCA |
| ENSG00000139146 | UUGGCAA |
| ENSG00000139146 | UUGGCAC |
| ENSG00000139154 | AAAACUG |
| ENSG00000139154 | AAAGUGC |
| ENSG00000139154 | AAGACAU |
| ENSG00000139154 | AAGGUGC |
| ENSG00000139154 | AAGUGCU |
| ENSG00000139154 | ACACACU |
| ENSG00000139154 | ACAGUAU |
| ENSG00000139154 | ACAUAGA |
| ENSG00000139154 | ACUGCAG |
| ENSG00000139154 | AGGAUGU |
| ENSG00000139154 | AUAAUAC |
| ENSG00000139154 | AUAUAAC |
| ENSG00000139154 | AUCCCUU |
| ENSG00000139154 | AUCCUUG |
| ENSG00000139154 | AUCCUUU |
| ENSG00000139154 | CACUGUU |
| ENSG00000139154 | CAGUAGU |
| ENSG00000139154 | CCUUCAU |
| ENSG00000139154 | CUACAAA |
| ENSG00000139154 | CUAGUCC |
| ENSG00000139154 | CUGCAGC |
| ENSG00000139154 | CUGCAGG |
| ENSG00000139154 | CUGGAAA |
| ENSG00000139154 | CUUUGGU |
| ENSG00000139154 | GAAACAU |
| ENSG00000139154 | GAAUUGU |
| ENSG00000139154 | GCUGGUG |
| ENSG00000139154 | GGCAGCG |
| ENSG00000139154 | GUGUGGC |
| ENSG00000139154 | UACAAAG |
| ENSG00000139154 | UCACAUU |
| ENSG00000139154 | UCCAGAG |
| ENSG00000139154 | UCUGGAG |
| ENSG00000139154 | UGAAGUG |
| ENSG00000139154 | UGCAAAG |
| ENSG00000139154 | UUCUGCA |
| ENSG00000139154 | UUGGCAC |

|                 |         |
|-----------------|---------|
| ENSG00000139154 | UUGUUCG |
| ENSG00000139154 | UUUGCAC |
| ENSG00000139163 | AACACUG |
| ENSG00000139163 | AAGGCAC |
| ENSG00000139163 | AGCCUGC |
| ENSG00000139163 | AGUGCAA |
| ENSG00000139163 | AGUGCUG |
| ENSG00000139163 | AUAAUAC |
| ENSG00000139163 | AUCCCUU |
| ENSG00000139163 | CAAAGCA |
| ENSG00000139163 | CACUGUU |
| ENSG00000139163 | CAGUGCA |
| ENSG00000139163 | CAUAUUG |
| ENSG00000139163 | CUACAAA |
| ENSG00000139163 | CUCUCC  |
| ENSG00000139163 | CUUCACC |
| ENSG00000139163 | GAGGUAG |
| ENSG00000139163 | GAGGUAU |
| ENSG00000139163 | GGCUCAG |
| ENSG00000139163 | GGUCUAG |
| ENSG00000139163 | GUGCAAA |
| ENSG00000139163 | UAGAGGA |
| ENSG00000139163 | UCCAGUU |
| ENSG00000139163 | UGCAAAG |
| ENSG00000139163 | UGCAUAU |
| ENSG00000139173 | AAGGCAC |
| ENSG00000139173 | UCUCAAG |
| ENSG00000139182 | ACAUUAC |
| ENSG00000139182 | GAAAACA |
| ENSG00000139182 | GAGCUGC |
| ENSG00000139190 | AGCAGCA |
| ENSG00000139190 | GCAGCAU |
| ENSG00000139190 | GCAGGAC |
| ENSG00000139190 | GCCUGGG |
| ENSG00000139190 | GUGCAAA |
| ENSG00000139190 | UCCCUUG |
| ENSG00000139190 | UGAAAUG |
| ENSG00000139197 | AAAAAUC |
| ENSG00000139197 | AGCACCA |
| ENSG00000139197 | AGCAGCA |
| ENSG00000139197 | CGUACCG |
| ENSG00000139197 | GAGGCAG |
| ENSG00000139200 | AGGAGCU |
| ENSG00000139200 | AUAAUAC |
| ENSG00000139200 | CACCACC |
| ENSG00000139200 | CCCACCG |
| ENSG00000139200 | CCCACCU |
| ENSG00000139200 | CUCCCAC |
| ENSG00000139200 | CUGGCUC |
| ENSG00000139200 | GAGUGUG |
| ENSG00000139200 | GGCUCAG |
| ENSG00000139200 | UAAUACA |
| ENSG00000139200 | UCACCAC |
| ENSG00000139200 | UCCACA  |
| ENSG00000139200 | UCCACC  |
| ENSG00000139200 | UGCAAAG |
| ENSG00000139209 | AAUACUG |
| ENSG00000139209 | CUUUGGU |
| ENSG00000139209 | GGAAGAC |
| ENSG00000139209 | UCACAGU |
| ENSG00000139211 | UUGGUUC |
| ENSG00000139218 | AAAGAAU |
| ENSG00000139218 | AGCACCA |
| ENSG00000139218 | AGCAGCA |

|                 |         |
|-----------------|---------|
| ENSG00000139218 | CAGUAGU |
| ENSG00000139218 | GCAGCAU |
| ENSG00000139218 | GUGCUUG |
| ENSG00000139218 | UAUUGCU |
| ENSG00000139219 | CAGUCUG |
| ENSG00000139219 | GCACCAU |
| ENSG00000139219 | GGAAGAC |
| ENSG00000139219 | GUCUGCC |
| ENSG00000139220 | AGUGCAA |
| ENSG00000139220 | AGUGCUG |
| ENSG00000139263 | GAGGUAU |
| ENSG00000139266 | ACCAGCA |
| ENSG00000139266 | AGGAGCU |
| ENSG00000139266 | CUGGGGG |
| ENSG00000139266 | CUUCACC |
| ENSG00000139266 | GAGGUAG |
| ENSG00000139266 | GAGGUAU |
| ENSG00000139266 | GCCCUGU |
| ENSG00000139266 | GGAGUCC |
| ENSG00000139266 | GGCAUUG |
| ENSG00000139266 | UAUUGCU |
| ENSG00000139266 | UGCAUUA |
| ENSG00000139266 | UGCCAGC |
| ENSG00000139266 | UGCCCUG |
| ENSG00000139266 | UUAUGCA |
| ENSG00000139289 | ACAGUAU |
| ENSG00000139289 | ACAUCAC |
| ENSG00000139289 | CUGCCCC |
| ENSG00000139289 | CUUACAG |
| ENSG00000139289 | GCAACUU |
| ENSG00000139289 | GCAGAAG |
| ENSG00000139289 | GGUGGUU |
| ENSG00000139289 | GUGCAAA |
| ENSG00000139289 | UACAGUU |
| ENSG00000139289 | UCCAGAG |
| ENSG00000139289 | UGGUACC |
| ENSG00000139289 | UUGUUCG |
| ENSG00000139291 | UUCUAAU |
| ENSG00000139318 | CCCUGAG |
| ENSG00000139318 | CUUUGGU |
| ENSG00000139318 | UGCAUUG |
| ENSG00000139318 | UGCUCAC |
| ENSG00000139318 | UUGAGGC |
| ENSG00000139324 | GCACCAU |
| ENSG00000139324 | UCAAGUA |
| ENSG00000139350 | AAUACUG |
| ENSG00000139352 | AAAGUUU |
| ENSG00000139352 | AAAUUUC |
| ENSG00000139352 | AACUGGU |
| ENSG00000139352 | AAGACAU |
| ENSG00000139352 | ACAUUAC |
| ENSG00000139352 | AGCUGCC |
| ENSG00000139352 | AUAAUAC |
| ENSG00000139352 | GUGCAAA |
| ENSG00000139352 | GUUAGGA |
| ENSG00000139352 | UAAUAUC |
| ENSG00000139352 | UACAAAG |
| ENSG00000139352 | UAUUACC |
| ENSG00000139352 | UCACAAG |
| ENSG00000139352 | UGCAAAG |
| ENSG00000139352 | UUAGGAU |
| ENSG00000139352 | UUGUUCG |
| ENSG00000139352 | UUUGCAC |
| ENSG00000139364 | AAAGGUA |

|                 |         |
|-----------------|---------|
| ENSG00000139364 | ACAUUCA |
| ENSG00000139364 | CAAAGCA |
| ENSG00000139364 | GAAGGAA |
| ENSG00000139364 | GAGAUGA |
| ENSG00000139364 | GCUACAU |
| ENSG00000139364 | GGGGUCC |
| ENSG00000139364 | GUGCUUG |
| ENSG00000139364 | GUGGGGA |
| ENSG00000139364 | UGCUGAC |
| ENSG00000139364 | UGGAUAA |
| ENSG00000139364 | UGUGCUU |
| ENSG00000139372 | AAGGCAC |
| ENSG00000139372 | ACAGUAU |
| ENSG00000139372 | CUGCAGC |
| ENSG00000139372 | GUAAACA |
| ENSG00000139428 | AAAGGUA |
| ENSG00000139428 | AGGACAC |
| ENSG00000139428 | AUACAAG |
| ENSG00000139428 | CUCACAC |
| ENSG00000139428 | GUCAUUG |
| ENSG00000139428 | UGGGAUC |
| ENSG00000139433 | AAGGCAC |
| ENSG00000139433 | GGGUUUA |
| ENSG00000139433 | UCACAGG |
| ENSG00000139433 | UGAAAUG |
| ENSG00000139436 | AAAGUGC |
| ENSG00000139436 | AAGAACC |
| ENSG00000139436 | AAGGCAC |
| ENSG00000139436 | AAGGUGC |
| ENSG00000139436 | AAGUGCA |
| ENSG00000139436 | AGUGCAA |
| ENSG00000139436 | AUAAAGU |
| ENSG00000139436 | CUUGGAG |
| ENSG00000139436 | CUUUGGU |
| ENSG00000139436 | GGGCCCC |
| ENSG00000139436 | GUGCAAA |
| ENSG00000139436 | UAUUGCU |
| ENSG00000139436 | UCCUAUA |
| ENSG00000139436 | UGCAUAG |
| ENSG00000139436 | UGCAUUA |
| ENSG00000139436 | UUCCUAG |
| ENSG00000139436 | UUGGCAC |
| ENSG00000139437 | CUCUGGG |
| ENSG00000139437 | CUGGGCA |
| ENSG00000139438 | AACAUUC |
| ENSG00000139438 | ACAGUAC |
| ENSG00000139438 | ACAGUAU |
| ENSG00000139438 | AGUGCAA |
| ENSG00000139438 | AGUGCUG |
| ENSG00000139438 | AGUGGUU |
| ENSG00000139438 | CACAGUG |
| ENSG00000139438 | CUCACAC |
| ENSG00000139438 | CUCUCC  |
| ENSG00000139438 | CUUCACC |
| ENSG00000139438 | CUUGGAG |
| ENSG00000139438 | GUGCUUG |
| ENSG00000139438 | GUUAGGA |
| ENSG00000139438 | UCACAGU |
| ENSG00000139438 | UCUCACC |
| ENSG00000139438 | UGGAGAU |
| ENSG00000139438 | UGUGCGG |
| ENSG00000139438 | UGUGCGU |
| ENSG00000139445 | AAAUUUC |
| ENSG00000139445 | AGUGCUU |

|                 |          |
|-----------------|----------|
| ENSG00000139496 | AAGGCAC  |
| ENSG00000139496 | CCAGUGC  |
| ENSG00000139496 | CCAGUGU  |
| ENSG00000139496 | CUUCACC  |
| ENSG00000139496 | GAGGCAG  |
| ENSG00000139496 | GCAUCCC  |
| ENSG00000139496 | UGCAUAG  |
| ENSG00000139496 | UGCCUG   |
| ENSG00000139505 | AAAGUAC  |
| ENSG00000139505 | AAGGCAC  |
| ENSG00000139505 | ACAAUUAU |
| ENSG00000139505 | CAGUCCA  |
| ENSG00000139505 | CAGUGCA  |
| ENSG00000139505 | CUAUACA  |
| ENSG00000139505 | GAUAUGU  |
| ENSG00000139505 | UAUAUGA  |
| ENSG00000139505 | UCCCUUG  |
| ENSG00000139508 | AAGUGCU  |
| ENSG00000139514 | AAGGCAC  |
| ENSG00000139514 | AUACAAG  |
| ENSG00000139514 | CAGCAGA  |
| ENSG00000139514 | CAGUAGU  |
| ENSG00000139514 | CUAGUAA  |
| ENSG00000139514 | CUAGUAG  |
| ENSG00000139514 | CUCAAAC  |
| ENSG00000139514 | CUUUGGU  |
| ENSG00000139514 | GACCCUG  |
| ENSG00000139514 | GCACCAU  |
| ENSG00000139514 | GCUUCCU  |
| ENSG00000139514 | GGGUCUU  |
| ENSG00000139514 | UCCAGUU  |
| ENSG00000139514 | UCUCAAG  |
| ENSG00000139517 | AAGGCAC  |
| ENSG00000139517 | AAUGUUG  |
| ENSG00000139517 | UUCAAGC  |
| ENSG00000139517 | UCCCAUA  |
| ENSG00000139517 | UUGGCAC  |
| ENSG00000139537 | CACAGGG  |
| ENSG00000139537 | UAAUAGU  |
| ENSG00000139537 | UCACAGG  |
| ENSG00000139546 | AGCAGCA  |
| ENSG00000139546 | AGGCAGG  |
| ENSG00000139546 | CAGUCUG  |
| ENSG00000139546 | GAGGUAG  |
| ENSG00000139546 | UGUGUCA  |
| ENSG00000139547 | UCCCUGU  |
| ENSG00000139567 | CACAAUG  |
| ENSG00000139567 | CUCUGGG  |
| ENSG00000139567 | CUGCAGG  |
| ENSG00000139567 | UCCCUGU  |
| ENSG00000139567 | UGGCUGC  |
| ENSG00000139597 | AGCACCA  |
| ENSG00000139597 | CCAGCAU  |
| ENSG00000139597 | GACCAUG  |
| ENSG00000139597 | GCACCAU  |
| ENSG00000139613 | AGGAGCU  |
| ENSG00000139613 | AGUAGUU  |
| ENSG00000139613 | CAGUAGU  |
| ENSG00000139620 | CCAUUAC  |
| ENSG00000139620 | UCCCUUU  |
| ENSG00000139624 | AAUCACU  |
| ENSG00000139624 | CAAGAGC  |
| ENSG00000139625 | AAAGUGC  |
| ENSG00000139625 | AGUGCAA  |

|                 |          |
|-----------------|----------|
| ENSG00000139625 | AUGUGGG  |
| ENSG00000139625 | GUGCAAA  |
| ENSG00000139625 | UCACAGU  |
| ENSG00000139629 | CUAGGCU  |
| ENSG00000139629 | UCACAGG  |
| ENSG00000139636 | AGUGCUU  |
| ENSG00000139636 | CACAGUG  |
| ENSG00000139645 | AAAACUG  |
| ENSG00000139645 | AAAGCUG  |
| ENSG00000139645 | AACACUG  |
| ENSG00000139645 | AACCUGG  |
| ENSG00000139645 | AAGGUGC  |
| ENSG00000139645 | AAGUGCU  |
| ENSG00000139645 | AAUACUG  |
| ENSG00000139645 | ACAGGUG  |
| ENSG00000139645 | ACAGUAC  |
| ENSG00000139645 | ACAGUUA  |
| ENSG00000139645 | ACAUUCA  |
| ENSG00000139645 | ACCACAG  |
| ENSG00000139645 | ACUGGCU  |
| ENSG00000139645 | ACUGUGU  |
| ENSG00000139645 | AGCACCA  |
| ENSG00000139645 | AGCCCUU  |
| ENSG00000139645 | AGCUGCC  |
| ENSG00000139645 | AGGAGCU  |
| ENSG00000139645 | AGGGAGG  |
| ENSG00000139645 | AGGGUCU  |
| ENSG00000139645 | AGUAGUU  |
| ENSG00000139645 | AGUGCAA  |
| ENSG00000139645 | AGUGCUU  |
| ENSG00000139645 | AGUGGUU  |
| ENSG00000139645 | AUGCACC  |
| ENSG00000139645 | AUGGCUU  |
| ENSG00000139645 | CAA AUGC |
| ENSG00000139645 | CACACCG  |
| ENSG00000139645 | CACACCU  |
| ENSG00000139645 | CACAGGG  |
| ENSG00000139645 | CACCAGC  |
| ENSG00000139645 | CAGACAG  |
| ENSG00000139645 | CAGCAGA  |
| ENSG00000139645 | CAGCAGG  |
| ENSG00000139645 | CAGGCUC  |
| ENSG00000139645 | CAGUAGU  |
| ENSG00000139645 | CAGUGCA  |
| ENSG00000139645 | CAUAUUG  |
| ENSG00000139645 | CCAGGAG  |
| ENSG00000139645 | CCCCUGG  |
| ENSG00000139645 | CCUGCUG  |
| ENSG00000139645 | CUCACAC  |
| ENSG00000139645 | CUCAGGG  |
| ENSG00000139645 | CUCCAA   |
| ENSG00000139645 | CUCCAC   |
| ENSG00000139645 | CUCUGGG  |
| ENSG00000139645 | CUGCAGC  |
| ENSG00000139645 | CUGCAGG  |
| ENSG00000139645 | CUGGACU  |
| ENSG00000139645 | CUUACAG  |
| ENSG00000139645 | CUUCUCU  |
| ENSG00000139645 | CUUUGGU  |
| ENSG00000139645 | GAAUUGU  |
| ENSG00000139645 | GAGCUGC  |
| ENSG00000139645 | GAGGGGC  |
| ENSG00000139645 | GAGGUAG  |
| ENSG00000139645 | GAGGUUA  |



|                 |         |
|-----------------|---------|
| ENSG00000139645 | GAGUGUG |
| ENSG00000139645 | GAUUGUA |
| ENSG00000139645 | GAUUGUC |
| ENSG00000139645 | GCACCAU |
| ENSG00000139645 | GCAGCAU |
| ENSG00000139645 | GCCCUUA |
| ENSG00000139645 | GCCUGGA |
| ENSG00000139645 | GCUACAU |
| ENSG00000139645 | GGAGAGA |
| ENSG00000139645 | GGAGGAG |
| ENSG00000139645 | GGAGGCA |
| ENSG00000139645 | GGAUUUU |
| ENSG00000139645 | GGCAAGA |
| ENSG00000139645 | GGCAGGG |
| ENSG00000139645 | GGCAGUG |
| ENSG00000139645 | GGCUCAG |
| ENSG00000139645 | GGGGUGG |
| ENSG00000139645 | GGUGGGC |
| ENSG00000139645 | GGUUACC |
| ENSG00000139645 | GUCUGCC |
| ENSG00000139645 | GUCUUGC |
| ENSG00000139645 | GUGACAG |
| ENSG00000139645 | GUGCUUG |
| ENSG00000139645 | UACAGUU |
| ENSG00000139645 | UAUUGCU |
| ENSG00000139645 | UCAAGUA |
| ENSG00000139645 | UCACACA |
| ENSG00000139645 | UCACAGG |
| ENSG00000139645 | UCACAUU |
| ENSG00000139645 | UCAUGAU |
| ENSG00000139645 | UCCAGUU |
| ENSG00000139645 | UCCCUGU |
| ENSG00000139645 | UGCAUAG |
| ENSG00000139645 | UGCAUAU |
| ENSG00000139645 | UGCUCAC |
| ENSG00000139645 | UGGGACA |
| ENSG00000139645 | UGGGUAC |
| ENSG00000139645 | UGUCUGC |
| ENSG00000139645 | UUCUAAU |
| ENSG00000139645 | UUGGCAC |
| ENSG00000139645 | UUGGUCC |
| ENSG00000139645 | UUGGUUC |
| ENSG00000139651 | AAAAGUA |
| ENSG00000139651 | CACCACC |
| ENSG00000139651 | CAGCAGA |
| ENSG00000139651 | CAGCUGG |
| ENSG00000139651 | CAGUAGA |
| ENSG00000139651 | CAGUAGU |
| ENSG00000139651 | CAGUCUG |
| ENSG00000139651 | CCAGGAG |
| ENSG00000139651 | CCAGUGC |
| ENSG00000139651 | CCAGUGU |
| ENSG00000139651 | CCCACCG |
| ENSG00000139651 | CCCACCU |
| ENSG00000139651 | CCUGUAC |
| ENSG00000139651 | CUCCCAC |
| ENSG00000139651 | GAGCUGC |
| ENSG00000139651 | GAGGUAG |
| ENSG00000139651 | GGGAGCU |
| ENSG00000139651 | GGGCCCC |
| ENSG00000139651 | GGUGGGC |
| ENSG00000139651 | UAUAAAG |
| ENSG00000139651 | UCCCACC |
| ENSG00000139651 | UGCCAGC |

|                 |          |
|-----------------|----------|
| ENSG00000139651 | UUCCUCG  |
| ENSG00000139651 | UUGGUCC  |
| ENSG00000139668 | AAAGUGC  |
| ENSG00000139668 | CAAAGCA  |
| ENSG00000139668 | GUGCAAA  |
| ENSG00000139668 | UGAAGCU  |
| ENSG00000139668 | UGUAUAA  |
| ENSG00000139687 | AAAGUGC  |
| ENSG00000139687 | AAGUGCA  |
| ENSG00000139687 | CAGUAGA  |
| ENSG00000139687 | GAGGUAG  |
| ENSG00000139687 | UCCUGAG  |
| ENSG00000139719 | CUGCAGC  |
| ENSG00000139719 | CUGCAGG  |
| ENSG00000139722 | AAAAAUC  |
| ENSG00000139722 | AAGGCAC  |
| ENSG00000139722 | ACAGUAU  |
| ENSG00000139722 | AGUGCAA  |
| ENSG00000139722 | CCCUGAG  |
| ENSG00000139722 | GUGCAAA  |
| ENSG00000139722 | UCCUGU   |
| ENSG00000139725 | GGCCUG   |
| ENSG00000139726 | AAUCCUU  |
| ENSG00000139726 | UACAGUU  |
| ENSG00000139726 | UCCCUUU  |
| ENSG00000139726 | UGGCCAC  |
| ENSG00000139726 | UUGGCAC  |
| ENSG00000139734 | UUCAAGC  |
| ENSG00000139734 | UUUCAAC  |
| ENSG00000139737 | AACAUUC  |
| ENSG00000139737 | UGUGCUU  |
| ENSG00000139746 | AAAAACC  |
| ENSG00000139746 | AAAGAAU  |
| ENSG00000139746 | AACAUUC  |
| ENSG00000139746 | AAGAACC  |
| ENSG00000139746 | ACAUAGA  |
| ENSG00000139746 | ACAUUCA  |
| ENSG00000139746 | UCAUACA  |
| ENSG00000139746 | UGCAUAG  |
| ENSG00000139793 | AAGACAU  |
| ENSG00000139793 | AAGUCAC  |
| ENSG00000139793 | AGCAGCG  |
| ENSG00000139793 | AGCAGCU  |
| ENSG00000139793 | AGGUAGU  |
| ENSG00000139793 | AUCACUA  |
| ENSG00000139793 | CAGCUGG  |
| ENSG00000139793 | CAGUUAC  |
| ENSG00000139793 | GUAACA   |
| ENSG00000139793 | GUGCAAA  |
| ENSG00000139793 | UAUAAUA  |
| ENSG00000139793 | UAUAUGA  |
| ENSG00000139793 | UGCAAAG  |
| ENSG00000139793 | UGGUACC  |
| ENSG00000139800 | ACAUUAC  |
| ENSG00000139800 | AGCACCA  |
| ENSG00000139800 | CUCUCC   |
| ENSG00000139800 | GCACCAU  |
| ENSG00000139826 | AAAUGGU  |
| ENSG00000139826 | AAGACAU  |
| ENSG00000139826 | AUGGCAC  |
| ENSG00000139826 | AUUGCAC  |
| ENSG00000139826 | CAAAGUG  |
| ENSG00000139826 | CAGUUAC  |
| ENSG00000139826 | GAGGUAAU |

|                 |         |
|-----------------|---------|
| ENSG00000139826 | GCUGGAU |
| ENSG00000139826 | GUCAGUU |
| ENSG00000139826 | UAUUGCU |
| ENSG00000139826 | UGGAUAA |
| ENSG00000139832 | UCACAGU |
| ENSG00000139832 | UCCUGAG |
| ENSG00000139842 | ACAUUAC |
| ENSG00000139842 | CUUUGGU |
| ENSG00000139842 | UUGGCAC |
| ENSG00000139874 | CACACCU |
| ENSG00000139874 | GAGAACC |
| ENSG00000139874 | GUUCAUG |
| ENSG00000139874 | UGAAAGG |
| ENSG00000139874 | UGAAGCU |
| ENSG00000139880 | UCACAGU |
| ENSG00000139890 | AAGAACC |
| ENSG00000139890 | GACCAUG |
| ENSG00000139890 | GGCGACA |
| ENSG00000139890 | UUCCUAG |
| ENSG00000139890 | UUGGUUC |
| ENSG00000139899 | CAGGCUC |
| ENSG00000139899 | CUGCAGG |
| ENSG00000139910 | AAAACUG |
| ENSG00000139910 | AAAAGUA |
| ENSG00000139910 | AAAGGUA |
| ENSG00000139910 | AAAGUAC |
| ENSG00000139910 | AAAGUAU |
| ENSG00000139910 | AACUCUA |
| ENSG00000139910 | ACAGGUG |
| ENSG00000139910 | ACAGUAU |
| ENSG00000139910 | ACUCAGG |
| ENSG00000139910 | ACUGCAU |
| ENSG00000139910 | ACUGGCC |
| ENSG00000139910 | AGCAGCU |
| ENSG00000139910 | AGCCAGU |
| ENSG00000139910 | AGGAUGU |
| ENSG00000139910 | AGUAGUU |
| ENSG00000139910 | AUUCAUU |
| ENSG00000139910 | CACAGUG |
| ENSG00000139910 | CAGCUGG |
| ENSG00000139910 | CUCCAUU |
| ENSG00000139910 | GAGAUGA |
| ENSG00000139910 | GAGGCUG |
| ENSG00000139910 | GAGGUAG |
| ENSG00000139910 | GAGUAUU |
| ENSG00000139910 | GCAACUU |
| ENSG00000139910 | GCUGGUG |
| ENSG00000139910 | GGCAGGG |
| ENSG00000139910 | GGGUCUU |
| ENSG00000139910 | GUAAACA |
| ENSG00000139910 | GUGCUUG |
| ENSG00000139910 | GUUAAUG |
| ENSG00000139910 | GUUCAUG |
| ENSG00000139910 | UAAUGCU |
| ENSG00000139910 | UAUUGCU |
| ENSG00000139910 | UCACAGG |
| ENSG00000139910 | UCCAGAG |
| ENSG00000139910 | UCCCUGU |
| ENSG00000139910 | UCUCAAG |
| ENSG00000139910 | UGAAGUG |
| ENSG00000139910 | UGACUGU |
| ENSG00000139910 | UGAGGAC |
| ENSG00000139910 | UGAUCCA |
| ENSG00000139910 | UGCAUAG |

|                 |          |
|-----------------|----------|
| ENSG00000139910 | UGCAUUAU |
| ENSG00000139910 | UGCAUUG  |
| ENSG00000139910 | UGGCUGC  |
| ENSG00000139910 | UGGGAUC  |
| ENSG00000139910 | UGUUGAA  |
| ENSG00000139910 | UUCUGCA  |
| ENSG00000139915 | AAAGAGG  |
| ENSG00000139915 | AAGGCAC  |
| ENSG00000139915 | AGUGCAA  |
| ENSG00000139915 | AGUGCUU  |
| ENSG00000139915 | CAGGCUC  |
| ENSG00000139915 | CAGUGCA  |
| ENSG00000139915 | CCCUGUU  |
| ENSG00000139915 | GAAACAU  |
| ENSG00000139915 | GGUUGAC  |
| ENSG00000139915 | GUGAGGU  |
| ENSG00000139915 | GUGCUUG  |
| ENSG00000139915 | UAUAAAG  |
| ENSG00000139915 | UGCAUAG  |
| ENSG00000139915 | UGCAUUAU |
| ENSG00000139915 | UUCUAAU  |
| ENSG00000139915 | UUGACAC  |
| ENSG00000139915 | UUGGUUC  |
| ENSG00000139926 | AACACUG  |
| ENSG00000139926 | AAGUGCA  |
| ENSG00000139926 | CUGACUC  |
| ENSG00000139926 | UACAAAG  |
| ENSG00000139926 | UCACAGG  |
| ENSG00000139926 | UCACAGU  |
| ENSG00000139946 | ACUGUAG  |
| ENSG00000139946 | AGCAGCA  |
| ENSG00000139946 | AGCCCUU  |
| ENSG00000139946 | CACAGUG  |
| ENSG00000139946 | CCCUGAG  |
| ENSG00000139946 | CUGCAGC  |
| ENSG00000139946 | CUUCACC  |
| ENSG00000139946 | CUUGUAU  |
| ENSG00000139946 | GAGGCAG  |
| ENSG00000139946 | GCAGCAU  |
| ENSG00000139946 | GCAUCCC  |
| ENSG00000139946 | GUGACAG  |
| ENSG00000139946 | UCACAGG  |
| ENSG00000139946 | UCCUGU   |
| ENSG00000139946 | UUCAAAU  |
| ENSG00000139946 | UUCUGCA  |
| ENSG00000139970 | AGUACUG  |
| ENSG00000139970 | GUGCAAA  |
| ENSG00000139970 | UCAAGUA  |
| ENSG00000139998 | ACCAGCA  |
| ENSG00000139998 | ACUCAGC  |
| ENSG00000139998 | AGCACCA  |
| ENSG00000139998 | AGGCAGG  |
| ENSG00000139998 | CACCAGC  |
| ENSG00000139998 | CCAGUGC  |
| ENSG00000139998 | CUGCAGC  |
| ENSG00000139998 | CUUCUCU  |
| ENSG00000139998 | GAAGGAA  |
| ENSG00000139998 | GAGGCAG  |
| ENSG00000139998 | GAGGUAG  |
| ENSG00000139998 | GCAGCAU  |
| ENSG00000139998 | GCAGGUU  |
| ENSG00000139998 | GGCAGGG  |
| ENSG00000139998 | UCACAGG  |
| ENSG00000139998 | UGAAAUG  |

|                 |          |
|-----------------|----------|
| ENSG0000013998  | UGCUCAC  |
| ENSG00000140044 | AAAGUAAU |
| ENSG00000140044 | AACAUUC  |
| ENSG00000140044 | AACUGGU  |
| ENSG00000140044 | ACUCCAG  |
| ENSG00000140044 | AUGUGCC  |
| ENSG00000140044 | CAGCAA   |
| ENSG00000140044 | CUACAGU  |
| ENSG00000140044 | CUCCAGC  |
| ENSG00000140044 | CUUUGGU  |
| ENSG00000140044 | GUGCUUG  |
| ENSG00000140044 | UGUGCUU  |
| ENSG00000140044 | UUUUUGC  |
| ENSG00000140090 | AAGUGCA  |
| ENSG00000140090 | AAUACUG  |
| ENSG00000140090 | AGCACCA  |
| ENSG00000140090 | CAAAGUG  |
| ENSG00000140090 | GUGCAA   |
| ENSG00000140090 | GUGCUUG  |
| ENSG00000140092 | UCACAGG  |
| ENSG00000140092 | UCACAGU  |
| ENSG00000140153 | AAGUGCU  |
| ENSG00000140153 | UAAUACA  |
| ENSG00000140153 | UAUAAUA  |
| ENSG00000140153 | UGCAGCU  |
| ENSG00000140157 | AAACUGU  |
| ENSG00000140157 | AGUGCAA  |
| ENSG00000140157 | GUCAUUG  |
| ENSG00000140157 | GUUAAUG  |
| ENSG00000140157 | UUGGUCC  |
| ENSG00000140199 | AACAGUC  |
| ENSG00000140199 | AGCAAAA  |
| ENSG00000140199 | AUGGCUU  |
| ENSG00000140199 | AUGUAAU  |
| ENSG00000140199 | CUGCAGC  |
| ENSG00000140199 | GAUUGGU  |
| ENSG00000140199 | GGAGUGU  |
| ENSG00000140199 | GGAUUUU  |
| ENSG00000140199 | GGCUCUG  |
| ENSG00000140199 | UAAUAUC  |
| ENSG00000140199 | UAUUGCU  |
| ENSG00000140199 | UUGAGGC  |
| ENSG00000140199 | UUGGCAC  |
| ENSG00000140259 | AGUGCUU  |
| ENSG00000140259 | CUUGUGU  |
| ENSG00000140262 | AAGACAU  |
| ENSG00000140262 | ACAAUAAU |
| ENSG00000140262 | ACACGGG  |
| ENSG00000140262 | ACUCCAG  |
| ENSG00000140262 | ACUGCAG  |
| ENSG00000140262 | ACUGCAU  |
| ENSG00000140262 | AGGUAAU  |
| ENSG00000140262 | AUGCAUU  |
| ENSG00000140262 | CUACAGU  |
| ENSG00000140262 | GAUUGUA  |
| ENSG00000140262 | GAUUGUC  |
| ENSG00000140262 | GCAGAAG  |
| ENSG00000140262 | GCUGGUG  |
| ENSG00000140262 | GGAAGAC  |
| ENSG00000140262 | GGCAGUG  |
| ENSG00000140262 | UAAGACG  |
| ENSG00000140262 | UAAGACU  |
| ENSG00000140262 | UAUGGUU  |
| ENSG00000140264 | AAAAAUC  |

|                 |         |
|-----------------|---------|
| ENSG00000140264 | AACACUG |
| ENSG00000140264 | AAUACUG |
| ENSG00000140264 | ACUCAGG |
| ENSG00000140264 | ACUGGCU |
| ENSG00000140264 | AGGGUUG |
| ENSG00000140264 | CGGUGCU |
| ENSG00000140264 | CUCAGGG |
| ENSG00000140264 | CUGGCUC |
| ENSG00000140264 | GAAGGAA |
| ENSG00000140264 | GGACCUG |
| ENSG00000140264 | GGAGAGA |
| ENSG00000140264 | GGCAAGA |
| ENSG00000140264 | GGGGUGC |
| ENSG00000140264 | GGGGUGG |
| ENSG00000140264 | GUGGCC  |
| ENSG00000140264 | UAAUACA |
| ENSG00000140264 | UUCAAGC |
| ENSG00000140265 | AAGACAU |
| ENSG00000140265 | AUCCCUU |
| ENSG00000140265 | GGCAGUG |
| ENSG00000140279 | GAGGCAG |
| ENSG00000140279 | GCCUGGG |
| ENSG00000140280 | AGUGCAA |
| ENSG00000140285 | AAAGUUU |
| ENSG00000140285 | AACAGUC |
| ENSG00000140285 | AACUGGU |
| ENSG00000140285 | AGCAGCG |
| ENSG00000140285 | AGCAGCU |
| ENSG00000140285 | AGUAGUU |
| ENSG00000140285 | AGUGCUG |
| ENSG00000140285 | CAGUAGA |
| ENSG00000140285 | CAGUCCA |
| ENSG00000140285 | CCUGCUG |
| ENSG00000140285 | GAUCAGA |
| ENSG00000140285 | GAUUGUC |
| ENSG00000140285 | GCAGCAU |
| ENSG00000140285 | GCUGGAU |
| ENSG00000140285 | GUCUGCC |
| ENSG00000140285 | UCAUGAU |
| ENSG00000140285 | UGUCUGC |
| ENSG00000140285 | UGUCUGG |
| ENSG00000140285 | UUCUUGU |
| ENSG00000140285 | UUGAUCA |
| ENSG00000140285 | UUUCAAC |
| ENSG00000140287 | UCACAAG |
| ENSG00000140299 | AUGGCUU |
| ENSG00000140299 | CAGUCUG |
| ENSG00000140299 | UAUUGCU |
| ENSG00000140299 | UGCUCAC |
| ENSG00000140320 | AAAGAAU |
| ENSG00000140320 | AAAGCUG |
| ENSG00000140320 | AACACUG |
| ENSG00000140320 | AAGGCAC |
| ENSG00000140320 | AAGUGCU |
| ENSG00000140320 | AAUCUCA |
| ENSG00000140320 | ACCAGCA |
| ENSG00000140320 | AGCACCA |
| ENSG00000140320 | AGCUUAU |
| ENSG00000140320 | AGGGAGG |
| ENSG00000140320 | AGUGCUG |
| ENSG00000140320 | AUGGAUU |
| ENSG00000140320 | CACAGUG |
| ENSG00000140320 | CAGCAGA |
| ENSG00000140320 | CAGCAGG |

|                 |         |
|-----------------|---------|
| ENSG00000140320 | CAUGGAU |
| ENSG00000140320 | CUACAAA |
| ENSG00000140320 | CUCAAAC |
| ENSG00000140320 | GAGGUAG |
| ENSG00000140320 | GAGGUAU |
| ENSG00000140320 | GGCAAGA |
| ENSG00000140320 | GGCAGGG |
| ENSG00000140320 | GUGAGGU |
| ENSG00000140320 | GUGCUUG |
| ENSG00000140320 | GUGGCC  |
| ENSG00000140320 | GUGUGGC |
| ENSG00000140320 | UACAAAG |
| ENSG00000140320 | UCACAGU |
| ENSG00000140320 | UCCCUUG |
| ENSG00000140320 | UCCUUGC |
| ENSG00000140320 | UCUCAAG |
| ENSG00000140320 | UGAAAUG |
| ENSG00000140320 | UGGGUGA |
| ENSG00000140320 | UGUGCUU |
| ENSG00000140320 | UUCAAGC |
| ENSG00000140320 | UUCUGCA |
| ENSG00000140320 | UUGGUUC |
| ENSG00000140323 | GAGGCUG |
| ENSG00000140326 | CUCCCAA |
| ENSG00000140332 | CACCACC |
| ENSG00000140332 | CCCUGAG |
| ENSG00000140332 | CUCUGGG |
| ENSG00000140332 | GAGCUGC |
| ENSG00000140332 | GCUACAU |
| ENSG00000140332 | UCACAAG |
| ENSG00000140332 | UUCAAAU |
| ENSG00000140332 | UUCUAAU |
| ENSG00000140350 | AGGUUAU |
| ENSG00000140350 | UCCACA  |
| ENSG00000140382 | AUGGCUU |
| ENSG00000140382 | CAGCUGG |
| ENSG00000140382 | CCUUCUG |
| ENSG00000140382 | CUUUGGU |
| ENSG00000140382 | GGCAUUG |
| ENSG00000140382 | UACAAAG |
| ENSG00000140382 | UCCAUA  |
| ENSG00000140382 | UUGGUUC |
| ENSG00000140382 | UUUCAAC |
| ENSG00000140386 | UAUAAAG |
| ENSG00000140391 | AGUGCAA |
| ENSG00000140396 | AAGUUGU |
| ENSG00000140396 | CCAGUGU |
| ENSG00000140396 | GGAGAGA |
| ENSG00000140396 | GUGAAUG |
| ENSG00000140396 | UAAUACA |
| ENSG00000140403 | ACCAGCA |
| ENSG00000140403 | AGCAGCU |
| ENSG00000140403 | AGGAGCU |
| ENSG00000140403 | CUAGUCC |
| ENSG00000140403 | CUUUGGU |
| ENSG00000140403 | GUCAACA |
| ENSG00000140403 | GUGCCAC |
| ENSG00000140403 | UCAACAG |
| ENSG00000140403 | UCCAUA  |
| ENSG00000140406 | AAAAAUC |
| ENSG00000140406 | AAAGGUA |
| ENSG00000140406 | AACAUUC |
| ENSG00000140406 | AAUCACU |
| ENSG00000140406 | CACAGUG |

|                 |          |
|-----------------|----------|
| ENSG00000140406 | GAAACAU  |
| ENSG00000140406 | GAGGUAG  |
| ENSG00000140406 | GAGGUAU  |
| ENSG00000140406 | GCUACAU  |
| ENSG00000140406 | UAAUAGU  |
| ENSG00000140406 | UCACAGU  |
| ENSG00000140443 | AAAAGUA  |
| ENSG00000140443 | AAAGCUG  |
| ENSG00000140443 | AAAUCCC  |
| ENSG00000140443 | AAAUGGU  |
| ENSG00000140443 | AACAAAC  |
| ENSG00000140443 | AACACUG  |
| ENSG00000140443 | ACAUAGA  |
| ENSG00000140443 | ACCCGUA  |
| ENSG00000140443 | ACUAGAU  |
| ENSG00000140443 | ACUGGAU  |
| ENSG00000140443 | ACUGUUU  |
| ENSG00000140443 | AGCAAAA  |
| ENSG00000140443 | AGCAGCA  |
| ENSG00000140443 | AGCAGCG  |
| ENSG00000140443 | AGUACUG  |
| ENSG00000140443 | AGUGGUU  |
| ENSG00000140443 | AUACAAG  |
| ENSG00000140443 | AUAU AAC |
| ENSG00000140443 | AUCCUUU  |
| ENSG00000140443 | AUGCCUU  |
| ENSG00000140443 | AUGUGCC  |
| ENSG00000140443 | CAAAGCA  |
| ENSG00000140443 | CUACAAA  |
| ENSG00000140443 | CUACAGU  |
| ENSG00000140443 | CUAGUAA  |
| ENSG00000140443 | CUUGGAG  |
| ENSG00000140443 | CUUGUAU  |
| ENSG00000140443 | GAAGGUC  |
| ENSG00000140443 | GACCUGG  |
| ENSG00000140443 | GAGAAAU  |
| ENSG00000140443 | GAGAUGA  |
| ENSG00000140443 | GAGCCCU  |
| ENSG00000140443 | GAGGUAU  |
| ENSG00000140443 | GCACCAU  |
| ENSG00000140443 | GGAAGAC  |
| ENSG00000140443 | GGAUGAG  |
| ENSG00000140443 | GGCAGCG  |
| ENSG00000140443 | GGCCUG   |
| ENSG00000140443 | GGUAGAC  |
| ENSG00000140443 | GGUUACC  |
| ENSG00000140443 | GUAAACA  |
| ENSG00000140443 | GUUUUCU  |
| ENSG00000140443 | GUCAACA  |
| ENSG00000140443 | GUCUGCC  |
| ENSG00000140443 | GUCUUGC  |
| ENSG00000140443 | GUGAGGU  |
| ENSG00000140443 | GUGUCAC  |
| ENSG00000140443 | GUUCAUG  |
| ENSG00000140443 | UACAAAG  |
| ENSG00000140443 | UCAUAGA  |
| ENSG00000140443 | UCCAGUU  |
| ENSG00000140443 | UCUGGAA  |
| ENSG00000140443 | UGCAUAG  |
| ENSG00000140443 | UGGCCAC  |
| ENSG00000140443 | UGGCCCU  |
| ENSG00000140443 | UGUCUGC  |
| ENSG00000140443 | UUAGGAU  |
| ENSG00000140443 | UUCUUGU  |



|                 |         |
|-----------------|---------|
| ENSG00000140443 | UUGGCAC |
| ENSG00000140443 | UUGGUCC |
| ENSG00000140443 | UUGUUCG |
| ENSG00000140450 | AGCACCA |
| ENSG00000140450 | AGCAGCA |
| ENSG00000140450 | AGCAGCU |
| ENSG00000140450 | AUAAUAC |
| ENSG00000140450 | AUUGCAC |
| ENSG00000140450 | GAGGUAG |
| ENSG00000140450 | GCACCAU |
| ENSG00000140450 | UCCUGAG |
| ENSG00000140451 | CUUCUCU |
| ENSG00000140455 | AUGUGCC |
| ENSG00000140463 | UCUGGAA |
| ENSG00000140463 | UCUGGAG |
| ENSG00000140464 | AAGGCAC |
| ENSG00000140464 | CUGGCUC |
| ENSG00000140464 | GGCUCAG |
| ENSG00000140464 | UGGAGAU |
| ENSG00000140470 | AUAUUAU |
| ENSG00000140470 | CAAAACU |
| ENSG00000140470 | GUCUCUG |
| ENSG00000140470 | GUGACUG |
| ENSG00000140470 | GUGCAAA |
| ENSG00000140470 | UUCAAAU |
| ENSG00000140474 | CCCUGAG |
| ENSG00000140479 | CUUUGGU |
| ENSG00000140479 | UAUAAAG |
| ENSG00000140497 | AAAGUGC |
| ENSG00000140497 | AAGGCAC |
| ENSG00000140497 | AAGUGCA |
| ENSG00000140511 | AAAAACC |
| ENSG00000140519 | CUGCAGC |
| ENSG00000140519 | CUGGGGG |
| ENSG00000140519 | GAGCCCU |
| ENSG00000140526 | AAAGUGC |
| ENSG00000140526 | AAAUCCC |
| ENSG00000140526 | AAGUGCA |
| ENSG00000140526 | ACCACAG |
| ENSG00000140526 | ACUGGAU |
| ENSG00000140526 | ACUGUGU |
| ENSG00000140526 | AGCAAAA |
| ENSG00000140526 | AGCCUGC |
| ENSG00000140526 | AUGGAUU |
| ENSG00000140526 | CAAAGCA |
| ENSG00000140526 | CAGCUGG |
| ENSG00000140526 | CUGGGCA |
| ENSG00000140526 | CUUGUAU |
| ENSG00000140526 | GAAGGAA |
| ENSG00000140526 | GAGAAGA |
| ENSG00000140526 | GAGACCU |
| ENSG00000140526 | GAGAUGA |
| ENSG00000140526 | GAGGCUG |
| ENSG00000140526 | GAUUGUA |
| ENSG00000140526 | GAUUGUC |
| ENSG00000140526 | GCAGCAU |
| ENSG00000140526 | GGAAGCC |
| ENSG00000140526 | GUAAACA |
| ENSG00000140526 | UAAUGCU |
| ENSG00000140526 | UACAAAG |
| ENSG00000140526 | UAUCAGA |
| ENSG00000140526 | UAUGGUU |
| ENSG00000140526 | UAUUGCU |
| ENSG00000140526 | UCAAGUA |

|                 |          |
|-----------------|----------|
| ENSG00000140526 | UCACAGG  |
| ENSG00000140526 | UCACAGU  |
| ENSG00000140526 | UGAAGCU  |
| ENSG00000140526 | UGAGAAG  |
| ENSG00000140526 | UGCAAAG  |
| ENSG00000140526 | UGCAGCU  |
| ENSG00000140526 | UGUGUGG  |
| ENSG00000140526 | UUCUUGU  |
| ENSG00000140526 | UUGUGUC  |
| ENSG00000140538 | AAGUCUU  |
| ENSG00000140538 | ACAAUUAU |
| ENSG00000140538 | AUAAAGU  |
| ENSG00000140538 | CACAGUG  |
| ENSG00000140538 | CACUCCU  |
| ENSG00000140538 | CUAUACA  |
| ENSG00000140538 | CUCUUCC  |
| ENSG00000140538 | GAGGUAG  |
| ENSG00000140538 | GAGGUUAU |
| ENSG00000140538 | GGAGGAG  |
| ENSG00000140538 | GUCUCUG  |
| ENSG00000140538 | UCCAGAG  |
| ENSG00000140538 | UCCCUUG  |
| ENSG00000140538 | UCCUAUA  |
| ENSG00000140538 | UGACAUC  |
| ENSG00000140543 | UCCCACA  |
| ENSG00000140545 | AGCUGCC  |
| ENSG00000140548 | CAGUAGU  |
| ENSG00000140548 | CCAGUGU  |
| ENSG00000140548 | GAGGUAG  |
| ENSG00000140548 | GGCUCAG  |
| ENSG00000140548 | GGUCUAG  |
| ENSG00000140548 | UUGGUCC  |
| ENSG00000140553 | CAGUAGU  |
| ENSG00000140553 | CUACAGU  |
| ENSG00000140557 | AAAUCCC  |
| ENSG00000140557 | AAGGCAC  |
| ENSG00000140557 | AAUUAUU  |
| ENSG00000140557 | ACAAGGU  |
| ENSG00000140557 | ACAGGUG  |
| ENSG00000140557 | ACUCAGC  |
| ENSG00000140557 | ACUGGCU  |
| ENSG00000140557 | ACUGUUU  |
| ENSG00000140557 | AUAAAGU  |
| ENSG00000140557 | AUACAAG  |
| ENSG00000140557 | CACACCU  |
| ENSG00000140557 | CCAGGAG  |
| ENSG00000140557 | CCUUCUU  |
| ENSG00000140557 | CUCUGGG  |
| ENSG00000140557 | CUGGGGG  |
| ENSG00000140557 | CUUCACC  |
| ENSG00000140557 | GCAGAAG  |
| ENSG00000140557 | GCAGGUU  |
| ENSG00000140557 | GCCCUUA  |
| ENSG00000140557 | GUGCCAC  |
| ENSG00000140557 | UAAUACA  |
| ENSG00000140557 | UAAUGCU  |
| ENSG00000140557 | UAGACUG  |
| ENSG00000140557 | UAUAAAG  |
| ENSG00000140557 | UAUAAUA  |
| ENSG00000140557 | UCAUUUG  |
| ENSG00000140557 | UCCCACA  |
| ENSG00000140557 | UGAAAGG  |
| ENSG00000140564 | AAGGCAC  |
| ENSG00000140564 | AGCAGCA  |

|                 |         |
|-----------------|---------|
| ENSG00000140564 | AGCCCUU |
| ENSG00000140564 | AGCUGCC |
| ENSG00000140564 | CACAGGG |
| ENSG00000140564 | CACAGUG |
| ENSG00000140564 | CACCACC |
| ENSG00000140564 | CCAUUAC |
| ENSG00000140564 | CCCUGAG |
| ENSG00000140564 | CUCAAAC |
| ENSG00000140564 | CUGCCCC |
| ENSG00000140564 | CUUGGAG |
| ENSG00000140564 | CUUUGGU |
| ENSG00000140564 | GAAAACA |
| ENSG00000140564 | GAUUGUA |
| ENSG00000140564 | GAUUGUC |
| ENSG00000140564 | GCACCAU |
| ENSG00000140564 | GCAGCAU |
| ENSG00000140564 | GGAGGCA |
| ENSG00000140564 | GGCUCAG |
| ENSG00000140564 | GUGCAAA |
| ENSG00000140564 | UGCAUAU |
| ENSG00000140564 | UGGAGAU |
| ENSG00000140564 | UUGGUCC |
| ENSG00000140575 | CAGUCCA |
| ENSG00000140575 | UACAAAG |
| ENSG00000140575 | UCAUGAU |
| ENSG00000140577 | AAAGUGC |
| ENSG00000140577 | AGCAGCA |
| ENSG00000140577 | AGUGGUU |
| ENSG00000140577 | AUACAAG |
| ENSG00000140577 | CAGUGCA |
| ENSG00000140577 | GAGGCAG |
| ENSG00000140577 | GGGGUGC |
| ENSG00000140577 | GGGUAAG |
| ENSG00000140577 | GUUAGGA |
| ENSG00000140577 | UAUAAAG |
| ENSG00000140650 | AGGGAGG |
| ENSG00000140650 | CCCUGAG |
| ENSG00000140691 | CCUUCUG |
| ENSG00000140694 | AAUUUUA |
| ENSG00000140743 | AAUACUG |
| ENSG00000140743 | UCAUAGA |
| ENSG00000140750 | CACUGUU |
| ENSG00000140750 | GCAGCAU |
| ENSG00000140750 | GCUUCCU |
| ENSG00000140795 | AGCAGCA |
| ENSG00000140795 | CAGCAGA |
| ENSG00000140795 | CCUUCUG |
| ENSG00000140795 | GAGCUAA |
| ENSG00000140798 | GUCAUUG |
| ENSG00000140807 | AAUGCCC |
| ENSG00000140807 | AGCAGCA |
| ENSG00000140807 | AGCAGCG |
| ENSG00000140807 | AUGCCUU |
| ENSG00000140807 | GAGGUAG |
| ENSG00000140830 | CAGCUGG |
| ENSG00000140848 | AAAAAUC |
| ENSG00000140853 | AGGCAGG |
| ENSG00000140853 | GAGGCAG |
| ENSG00000140853 | UUGAGGC |
| ENSG00000140854 | AGCAGCA |
| ENSG00000140859 | AAAAAUC |
| ENSG00000140873 | AAGUGCU |
| ENSG00000140873 | AGCAGCA |
| ENSG00000140873 | AGUGCUU |

|                 |          |
|-----------------|----------|
| ENSG00000140873 | CCAGCAU  |
| ENSG00000140873 | GCACCAU  |
| ENSG00000140873 | GUGCAAA  |
| ENSG00000140873 | UCAACAG  |
| ENSG00000140873 | UCAAGUA  |
| ENSG00000140873 | UUCAAGC  |
| ENSG00000140873 | UUGGCAC  |
| ENSG00000140931 | CAA AUGC |
| ENSG00000140937 | AAGGCGC  |
| ENSG00000140937 | AAUACUG  |
| ENSG00000140937 | ACAGUAU  |
| ENSG00000140937 | ACAUAGA  |
| ENSG00000140937 | ACAUUAC  |
| ENSG00000140937 | AGCAAAA  |
| ENSG00000140937 | AGUAACA  |
| ENSG00000140937 | CAAGAGC  |
| ENSG00000140937 | CACAGUG  |
| ENSG00000140937 | CAGCAGA  |
| ENSG00000140937 | CAGCAGG  |
| ENSG00000140937 | GGAAGCC  |
| ENSG00000140937 | UCAAGUA  |
| ENSG00000140937 | UCACAGG  |
| ENSG00000140937 | UUCAAAU  |
| ENSG00000140937 | UUCAAGC  |
| ENSG00000140941 | AAAGCUG  |
| ENSG00000140941 | AUCCCUU  |
| ENSG00000140941 | GCAACUU  |
| ENSG00000140943 | AAAGUGC  |
| ENSG00000140943 | CUUUGGU  |
| ENSG00000140945 | AACAUUC  |
| ENSG00000140945 | ACAUUCA  |
| ENSG00000140945 | AGCCCUU  |
| ENSG00000140945 | GUAAACA  |
| ENSG00000140945 | UGCAAAG  |
| ENSG00000140945 | UGCAUAG  |
| ENSG00000140945 | UGCAUAU  |
| ENSG00000140945 | UGCUCAC  |
| ENSG00000140945 | UUGAGGC  |
| ENSG00000140945 | UUUGCAA  |
| ENSG00000140948 | AAAGAAU  |
| ENSG00000140948 | AAAGUAA  |
| ENSG00000140948 | AAAGUAU  |
| ENSG00000140948 | AACAAAC  |
| ENSG00000140948 | AAGGCAC  |
| ENSG00000140948 | AAGUCUU  |
| ENSG00000140948 | AAUACUG  |
| ENSG00000140948 | AAUCCUU  |
| ENSG00000140948 | ACAGUAU  |
| ENSG00000140948 | ACAUUAC  |
| ENSG00000140948 | ACAUUCA  |
| ENSG00000140948 | ACCAGCA  |
| ENSG00000140948 | ACUGUGU  |
| ENSG00000140948 | ACUUGGA  |
| ENSG00000140948 | AGCUGCC  |
| ENSG00000140948 | AUAAUAC  |
| ENSG00000140948 | CUCCAUI  |
| ENSG00000140948 | CUGUUGA  |
| ENSG00000140948 | GAGGCUG  |
| ENSG00000140948 | GAUUGUC  |
| ENSG00000140948 | GCCUGU   |
| ENSG00000140948 | GCUGGUG  |
| ENSG00000140948 | GGCUCAG  |
| ENSG00000140948 | GUAAACA  |
| ENSG00000140948 | GUCAGUU  |

|                 |         |
|-----------------|---------|
| ENSG00000140948 | GUGUCAC |
| ENSG00000140948 | UACAAAG |
| ENSG00000140948 | UCAUUCG |
| ENSG00000140948 | UCCUUU  |
| ENSG00000140948 | UGACAUC |
| ENSG00000140948 | UGCAUAG |
| ENSG00000140948 | UGCAUUA |
| ENSG00000140948 | UGCCUG  |
| ENSG00000140948 | UGUGUCA |
| ENSG00000140948 | UUGGCAC |
| ENSG00000140948 | UUGUGUC |
| ENSG00000140983 | CCCUGAG |
| ENSG00000140983 | UGAGAAU |
| ENSG00000140992 | AACUACU |
| ENSG00000140992 | AAUACUG |
| ENSG00000140992 | ACAAUAU |
| ENSG00000140992 | AGAUAAA |
| ENSG00000140992 | AUAAUAC |
| ENSG00000140992 | AUAUUAU |
| ENSG00000140992 | CACAGUG |
| ENSG00000140992 | CAGUUAC |
| ENSG00000140992 | CGUGGCC |
| ENSG00000140992 | CUGGAAA |
| ENSG00000140992 | GACCCUG |
| ENSG00000140992 | GGCAGCG |
| ENSG00000140992 | GGUGGUC |
| ENSG00000140992 | GUCAGUU |
| ENSG00000140992 | GUGGCC  |
| ENSG00000140992 | UAUUACC |
| ENSG00000140992 | UCACAGU |
| ENSG00000140992 | UCCAGAG |
| ENSG00000140992 | UCUGGAA |
| ENSG00000140992 | UGACUGU |
| ENSG00000140992 | UGCAUUG |
| ENSG00000140992 | UGCUGAC |
| ENSG00000140992 | UUGUGUC |
| ENSG00000140992 | UUGUUCG |
| ENSG00000140995 | AGCACCA |
| ENSG00000141013 | ACUGGAU |
| ENSG00000141013 | CUCAGGG |
| ENSG00000141013 | CUGCAGC |
| ENSG00000141013 | GUGGGGA |
| ENSG00000141026 | ACCUGGA |
| ENSG00000141026 | CAGUUAC |
| ENSG00000141034 | AAAACUG |
| ENSG00000141034 | AAACUGU |
| ENSG00000141034 | AAAGCUG |
| ENSG00000141034 | AAAGUGC |
| ENSG00000141034 | AGCAAAA |
| ENSG00000141034 | AGCACCA |
| ENSG00000141034 | AGGGUCU |
| ENSG00000141034 | AUGUAAU |
| ENSG00000141034 | CAAUUGC |
| ENSG00000141034 | CUCCCAA |
| ENSG00000141034 | CUCCCAC |
| ENSG00000141034 | CUGACUC |
| ENSG00000141034 | GAAAACA |
| ENSG00000141034 | GCUGGUG |
| ENSG00000141034 | GGCAUUG |
| ENSG00000141034 | GGCUCUG |
| ENSG00000141034 | GGUUGAC |
| ENSG00000141034 | GUAAACA |
| ENSG00000141034 | UGCCUG  |
| ENSG00000141034 | UUCAAA  |

|                 |          |
|-----------------|----------|
| ENSG00000141034 | UUGGCAA  |
| ENSG00000141034 | UUGGCAC  |
| ENSG00000141034 | UUUCAAC  |
| ENSG00000141068 | AAAGAGG  |
| ENSG00000141068 | ACUCCAG  |
| ENSG00000141068 | ACUGGAU  |
| ENSG00000141068 | AGUGCCG  |
| ENSG00000141068 | AGUGCCU  |
| ENSG00000141068 | CACUCCU  |
| ENSG00000141068 | CUGGACU  |
| ENSG00000141068 | CUUUGGU  |
| ENSG00000141068 | GCAGAAG  |
| ENSG00000141068 | GCUACAU  |
| ENSG00000141068 | GUUAAUG  |
| ENSG00000141068 | UAAUGCU  |
| ENSG00000141068 | UGCAAAG  |
| ENSG00000141068 | UUCAAAU  |
| ENSG00000141084 | AAGGCAC  |
| ENSG00000141084 | AAUCUCU  |
| ENSG00000141084 | ACUCAAA  |
| ENSG00000141084 | ACUCAGC  |
| ENSG00000141084 | AGAUAAA  |
| ENSG00000141084 | AGGUAGU  |
| ENSG00000141084 | AUAU AAC |
| ENSG00000141084 | AUCACUA  |
| ENSG00000141084 | CAAAACU  |
| ENSG00000141084 | CACCAGC  |
| ENSG00000141084 | CAGCUGG  |
| ENSG00000141084 | CAUGGGU  |
| ENSG00000141084 | CCAGUGU  |
| ENSG00000141084 | CUCCAGC  |
| ENSG00000141084 | CUCCAC   |
| ENSG00000141084 | GAAACAU  |
| ENSG00000141084 | GAAGGAA  |
| ENSG00000141084 | GAGUUGA  |
| ENSG00000141084 | GCUACAU  |
| ENSG00000141084 | GGAGGAG  |
| ENSG00000141084 | GUAAACA  |
| ENSG00000141084 | GUGCUUG  |
| ENSG00000141084 | UAAUAUC  |
| ENSG00000141084 | UCAAGUA  |
| ENSG00000141084 | UCCAGAG  |
| ENSG00000141084 | UGCCAGC  |
| ENSG00000141084 | UGGACUG  |
| ENSG00000141084 | UGGGACA  |
| ENSG00000141084 | UGGGUAC  |
| ENSG00000141084 | UGUCUUU  |
| ENSG00000141084 | UGUGCUU  |
| ENSG00000141084 | UUGUGUC  |
| ENSG00000141127 | GCAACUU  |
| ENSG00000141127 | GCAGAAG  |
| ENSG00000141127 | UGGCCCU  |
| ENSG00000141140 | AAGGCAC  |
| ENSG00000141140 | CUUUGGU  |
| ENSG00000141140 | GGCAAGA  |
| ENSG00000141140 | UGGCCCU  |
| ENSG00000141140 | UGUCUUU  |
| ENSG00000141140 | UUGGCAA  |
| ENSG00000141140 | UUGGCAC  |
| ENSG00000141141 | ACCACAG  |
| ENSG00000141141 | CACCACC  |
| ENSG00000141141 | CCUUCAU  |
| ENSG00000141141 | UAUCAGA  |
| ENSG00000141150 | AAAACUG  |

|                 |         |
|-----------------|---------|
| ENSG00000141150 | ACAUUCA |
| ENSG00000141150 | ACCCGGC |
| ENSG00000141150 | ACCCUGU |
| ENSG00000141150 | AGCUGCC |
| ENSG00000141150 | AGGGAGG |
| ENSG00000141150 | AGUGAUC |
| ENSG00000141150 | CAAAACU |
| ENSG00000141150 | CCCUGAG |
| ENSG00000141150 | CUCUGGG |
| ENSG00000141150 | CUGCCCC |
| ENSG00000141150 | CUGGGGG |
| ENSG00000141150 | GACCCUG |
| ENSG00000141150 | GAGCCCU |
| ENSG00000141150 | GAGGGGC |
| ENSG00000141150 | GAGGUAG |
| ENSG00000141150 | GAUCAGA |
| ENSG00000141150 | GCCCUGU |
| ENSG00000141150 | GUCUCUG |
| ENSG00000141150 | GUGGGGA |
| ENSG00000141150 | UCCAGAG |
| ENSG00000141150 | UGGGACA |
| ENSG00000141150 | UUCUAAU |
| ENSG00000141150 | UUGUGUC |
| ENSG00000141161 | ACACACC |
| ENSG00000141179 | CACAAUG |
| ENSG00000141179 | GACUUCC |
| ENSG00000141179 | GAGAAAU |
| ENSG00000141198 | AAGGCAC |
| ENSG00000141198 | GUGCAAA |
| ENSG00000141198 | UCCUGAG |
| ENSG00000141219 | GUGCAAA |
| ENSG00000141232 | AAGACAU |
| ENSG00000141232 | AAUACUG |
| ENSG00000141232 | ACUCAAA |
| ENSG00000141232 | CAGUCCA |
| ENSG00000141232 | CUGACUC |
| ENSG00000141232 | UGAAGCU |
| ENSG00000141232 | UGUCUUU |
| ENSG00000141232 | UUGGCAA |
| ENSG00000141258 | AGGCAGG |
| ENSG00000141258 | AGUGCUG |
| ENSG00000141258 | CAGGCUC |
| ENSG00000141258 | CCCUGAG |
| ENSG00000141258 | GCAGAAG |
| ENSG00000141279 | AACGCCU |
| ENSG00000141279 | AACUACU |
| ENSG00000141279 | AAUUGCU |
| ENSG00000141279 | AUCAUAC |
| ENSG00000141279 | AUUCAUU |
| ENSG00000141279 | CACAGUG |
| ENSG00000141279 | CAGCUGG |
| ENSG00000141279 | CAGGAAC |
| ENSG00000141279 | CAUAUUG |
| ENSG00000141279 | GAAUUGU |
| ENSG00000141279 | GAGUGUG |
| ENSG00000141279 | UAUUACC |
| ENSG00000141279 | UCACACA |
| ENSG00000141279 | UCACAGG |
| ENSG00000141279 | UCUGGAA |
| ENSG00000141298 | AAAAACC |
| ENSG00000141298 | AAAGGUA |
| ENSG00000141298 | AAAGUAU |
| ENSG00000141298 | AAGGCAC |
| ENSG00000141298 | AAGUCAC |

|                 |          |
|-----------------|----------|
| ENSG00000141298 | AAUACUG  |
| ENSG00000141298 | AAUGCCC  |
| ENSG00000141298 | AGCAAAA  |
| ENSG00000141298 | AGGAGCU  |
| ENSG00000141298 | AGUGUGC  |
| ENSG00000141298 | AUAAAAGU |
| ENSG00000141298 | AUACAAG  |
| ENSG00000141298 | AUCACUA  |
| ENSG00000141298 | CCAGGAG  |
| ENSG00000141298 | CCUGCUG  |
| ENSG00000141298 | CCUUCUU  |
| ENSG00000141298 | CUCCAUU  |
| ENSG00000141298 | CUCUGGG  |
| ENSG00000141298 | CUGCCCC  |
| ENSG00000141298 | CUGGGGG  |
| ENSG00000141298 | GAGACCU  |
| ENSG00000141298 | GAGGCUG  |
| ENSG00000141298 | GCAGCAU  |
| ENSG00000141298 | GCAGGAC  |
| ENSG00000141298 | GGCUCAG  |
| ENSG00000141298 | GGGGCAG  |
| ENSG00000141298 | UCACCAC  |
| ENSG00000141298 | UGCAGCU  |
| ENSG00000141298 | UGCAUUG  |
| ENSG00000141298 | UUGGCAA  |
| ENSG00000141298 | UUGGCAC  |
| ENSG00000141314 | AAAUUUC  |
| ENSG00000141314 | AAGGCAC  |
| ENSG00000141314 | AGGGAGG  |
| ENSG00000141314 | CUCUGGG  |
| ENSG00000141314 | GGCAAGA  |
| ENSG00000141314 | UUUGCAA  |
| ENSG00000141349 | GGAGUGU  |
| ENSG00000141349 | UCACAGU  |
| ENSG00000141367 | AAAAACC  |
| ENSG00000141367 | AAACUGU  |
| ENSG00000141367 | AAAGGUA  |
| ENSG00000141367 | AAGUUGU  |
| ENSG00000141367 | ACAAUAU  |
| ENSG00000141367 | AGCAAAA  |
| ENSG00000141367 | AGCAUUC  |
| ENSG00000141367 | AGGUUUAU |
| ENSG00000141367 | AGUGAUC  |
| ENSG00000141367 | AGUGCAA  |
| ENSG00000141367 | AUGAUGC  |
| ENSG00000141367 | CAAAACU  |
| ENSG00000141367 | CAGUCCA  |
| ENSG00000141367 | CCAGUAC  |
| ENSG00000141367 | CUCAGGG  |
| ENSG00000141367 | CUCUUCC  |
| ENSG00000141367 | CUGGCUC  |
| ENSG00000141367 | CUUCACC  |
| ENSG00000141367 | GAGAAGA  |
| ENSG00000141367 | GUCUUGC  |
| ENSG00000141367 | GUGCAA   |
| ENSG00000141367 | UAGAGGA  |
| ENSG00000141367 | UAUAAAAG |
| ENSG00000141367 | UCACAAG  |
| ENSG00000141367 | UCCACA   |
| ENSG00000141367 | UGAAGUG  |
| ENSG00000141367 | UGAGAAG  |
| ENSG00000141367 | UGAUCCA  |
| ENSG00000141367 | UGCAUAG  |
| ENSG00000141367 | UGUCUGC  |



|                 |          |
|-----------------|----------|
| ENSG00000141367 | UGUCUGG  |
| ENSG00000141367 | UGUCUUU  |
| ENSG00000141367 | UUUCAAC  |
| ENSG00000141376 | CUCUUCC  |
| ENSG00000141380 | AAAGCUG  |
| ENSG00000141380 | ACAAUUAU |
| ENSG00000141380 | AGUGCUG  |
| ENSG00000141380 | AUACAAG  |
| ENSG00000141380 | CCUUCAU  |
| ENSG00000141380 | GAGUUGA  |
| ENSG00000141380 | GGAAUGU  |
| ENSG00000141380 | GGCUGCG  |
| ENSG00000141380 | GUAGUGU  |
| ENSG00000141380 | UCUAGAG  |
| ENSG00000141380 | UGCAUAG  |
| ENSG00000141380 | UGGCUGC  |
| ENSG00000141384 | AGUGCAA  |
| ENSG00000141384 | AUAAUAC  |
| ENSG00000141384 | AUACAAG  |
| ENSG00000141384 | CAGUGCA  |
| ENSG00000141384 | CUUUGGU  |
| ENSG00000141384 | GAAACAU  |
| ENSG00000141384 | GGCAGUG  |
| ENSG00000141384 | UACAAAG  |
| ENSG00000141401 | AUUGCAC  |
| ENSG00000141401 | UAUUGCU  |
| ENSG00000141401 | UGCAUUG  |
| ENSG00000141404 | CUACAAA  |
| ENSG00000141404 | GAGGUAG  |
| ENSG00000141404 | GGUGGUC  |
| ENSG00000141404 | UUCUGCA  |
| ENSG00000141424 | UGACCUA  |
| ENSG00000141429 | AAAGUAC  |
| ENSG00000141429 | AACAAAC  |
| ENSG00000141429 | AAUCCUU  |
| ENSG00000141429 | AAUCUCU  |
| ENSG00000141429 | ACAGUAC  |
| ENSG00000141429 | ACAGUAU  |
| ENSG00000141429 | ACAUUAC  |
| ENSG00000141429 | AGCAGCA  |
| ENSG00000141429 | AGUGUGC  |
| ENSG00000141429 | CCCUGUU  |
| ENSG00000141429 | CUCUUCC  |
| ENSG00000141429 | CUUGGAG  |
| ENSG00000141429 | CUUGUAU  |
| ENSG00000141429 | GGAGUGU  |
| ENSG00000141429 | GUGCAA   |
| ENSG00000141429 | UAUUGCU  |
| ENSG00000141429 | UCACAGG  |
| ENSG00000141429 | UCACAGU  |
| ENSG00000141429 | UUCUAAU  |
| ENSG00000141429 | UUUCAAC  |
| ENSG00000141431 | ACUGCAG  |
| ENSG00000141433 | AGUGCUG  |
| ENSG00000141433 | CGUGGCC  |
| ENSG00000141433 | CUCUAGC  |
| ENSG00000141433 | UAGGGCC  |
| ENSG00000141433 | UGCAGCU  |
| ENSG00000141441 | AAGGCAC  |
| ENSG00000141441 | AGCAGCA  |
| ENSG00000141441 | AGCAGCG  |
| ENSG00000141441 | CACACCU  |
| ENSG00000141441 | UGCAUAG  |
| ENSG00000141446 | UCCUGAG  |

|                 |         |
|-----------------|---------|
| ENSG00000141446 | UGGCCCU |
| ENSG00000141448 | AUUCAUU |
| ENSG00000141448 | AUUGCAC |
| ENSG00000141448 | CCCUGUU |
| ENSG00000141448 | GGAAGAC |
| ENSG00000141448 | UUGUUCG |
| ENSG00000141458 | AUGGCUU |
| ENSG00000141458 | AUUGCAC |
| ENSG00000141469 | GACCAUG |
| ENSG00000141469 | UAAUACA |
| ENSG00000141480 | CCAGUGU |
| ENSG00000141480 | UAAUGCU |
| ENSG00000141485 | GAGUGUG |
| ENSG00000141503 | AAAUGGU |
| ENSG00000141503 | AAGUGCU |
| ENSG00000141503 | ACAUUCA |
| ENSG00000141503 | AGCAAAA |
| ENSG00000141503 | AGCAGCA |
| ENSG00000141503 | AGGGUCU |
| ENSG00000141503 | AGUGCUU |
| ENSG00000141503 | CAGCAGG |
| ENSG00000141503 | CAGGCUC |
| ENSG00000141503 | CCAGUGC |
| ENSG00000141503 | CCAGUGU |
| ENSG00000141503 | CCCCCAG |
| ENSG00000141503 | CCCCUGG |
| ENSG00000141503 | CUCACAC |
| ENSG00000141503 | CUCCAUU |
| ENSG00000141503 | CUGCCCC |
| ENSG00000141503 | CUGCUCA |
| ENSG00000141503 | GCUGGUG |
| ENSG00000141503 | GGAGUGU |
| ENSG00000141503 | GGCCUG  |
| ENSG00000141503 | GGGAGCU |
| ENSG00000141503 | GGGGAGC |
| ENSG00000141503 | GGUUGAC |
| ENSG00000141503 | GUGCAAA |
| ENSG00000141503 | UGCUCAC |
| ENSG00000141503 | UGGCUGC |
| ENSG00000141510 | AAAAAUC |
| ENSG00000141510 | AAAGUUU |
| ENSG00000141510 | AGAUGUG |
| ENSG00000141510 | AGCUGCC |
| ENSG00000141510 | CACACCU |
| ENSG00000141510 | GAGGUAG |
| ENSG00000141510 | GAGGUAU |
| ENSG00000141522 | AAGGCAC |
| ENSG00000141522 | AAUACUG |
| ENSG00000141522 | AGCAGCA |
| ENSG00000141522 | CUUUGGU |
| ENSG00000141522 | GGAGGCA |
| ENSG00000141522 | UAGUGAG |
| ENSG00000141522 | UUGGUCC |
| ENSG00000141526 | GGAAUGU |
| ENSG00000141526 | UCCCACC |
| ENSG00000141540 | AACACUG |
| ENSG00000141540 | ACAGUAU |
| ENSG00000141540 | AGCACCA |
| ENSG00000141540 | AGGCAGG |
| ENSG00000141540 | AGUGGUU |
| ENSG00000141540 | AUGCCUU |
| ENSG00000141540 | CAGGUGA |
| ENSG00000141540 | GAGGCUG |
| ENSG00000141540 | GGAAGCC |

|                 |          |
|-----------------|----------|
| ENSG00000141540 | GGUUUAC  |
| ENSG00000141540 | UCUGGAA  |
| ENSG00000141542 | AGCAGCA  |
| ENSG00000141542 | CUUUGGU  |
| ENSG00000141542 | GGCAUUG  |
| ENSG00000141542 | UUGGCAA  |
| ENSG00000141542 | UUGGCAC  |
| ENSG00000141568 | AAAAAUC  |
| ENSG00000141568 | AAAGAAU  |
| ENSG00000141568 | AAAGUGC  |
| ENSG00000141568 | AACAAAC  |
| ENSG00000141568 | AAGUGCA  |
| ENSG00000141568 | AAGUGCU  |
| ENSG00000141568 | AAUGUUG  |
| ENSG00000141568 | ACCACAG  |
| ENSG00000141568 | AGUGCUG  |
| ENSG00000141568 | AGUGUGC  |
| ENSG00000141568 | AUGAUGA  |
| ENSG00000141568 | AUGAUGC  |
| ENSG00000141568 | CACAGGG  |
| ENSG00000141568 | CAGUGCA  |
| ENSG00000141568 | CAUAUUG  |
| ENSG00000141568 | CCCUGAG  |
| ENSG00000141568 | GAUUGUC  |
| ENSG00000141568 | GUCAACA  |
| ENSG00000141568 | UCACACA  |
| ENSG00000141568 | UGAAAUG  |
| ENSG00000141568 | UGCAGCU  |
| ENSG00000141568 | UUGGCAA  |
| ENSG00000141568 | UUGGUCC  |
| ENSG00000141568 | UUUGCAC  |
| ENSG00000141570 | GAGUUGA  |
| ENSG00000141570 | UGAAAUG  |
| ENSG00000141576 | GGAAUGU  |
| ENSG00000141579 | AAUUAUU  |
| ENSG00000141580 | AUGGCUU  |
| ENSG00000141580 | CACCAGC  |
| ENSG00000141580 | GUGCCUG  |
| ENSG00000141580 | UACAAAG  |
| ENSG00000141580 | UCAUGAU  |
| ENSG00000141580 | UUUGCAA  |
| ENSG00000141582 | AAUACUG  |
| ENSG00000141582 | ACAGUAC  |
| ENSG00000141582 | ACAUAGA  |
| ENSG00000141582 | AGCAGCG  |
| ENSG00000141582 | AGCAGCU  |
| ENSG00000141582 | AGCUUUAU |
| ENSG00000141582 | CUAGUAA  |
| ENSG00000141582 | CUCAAAC  |
| ENSG00000141582 | GGAAGCC  |
| ENSG00000141582 | UAAUAUC  |
| ENSG00000141582 | UAUAAUA  |
| ENSG00000141582 | UCAACAG  |
| ENSG00000141582 | UUCAAGC  |
| ENSG00000141582 | UUUGCAA  |
| ENSG00000141622 | AAAACUG  |
| ENSG00000141622 | AAACUGU  |
| ENSG00000141622 | AAAGAGC  |
| ENSG00000141622 | AAAGAGG  |
| ENSG00000141622 | AAGGCAC  |
| ENSG00000141622 | ACACACC  |
| ENSG00000141622 | ACCCUGU  |
| ENSG00000141622 | ACUAGAU  |
| ENSG00000141622 | ACUGGCU  |

|                 |          |
|-----------------|----------|
| ENSG00000141622 | AGCACCA  |
| ENSG00000141622 | AGCAUUC  |
| ENSG00000141622 | AGGAGCU  |
| ENSG00000141622 | AGGGAGG  |
| ENSG00000141622 | AGGGUCU  |
| ENSG00000141622 | AUAAAAGU |
| ENSG00000141622 | AUACAAG  |
| ENSG00000141622 | AUCCUUG  |
| ENSG00000141622 | AUCGUAC  |
| ENSG00000141622 | CAAAGCA  |
| ENSG00000141622 | CAAUUGC  |
| ENSG00000141622 | CAGCUGG  |
| ENSG00000141622 | CGUACCG  |
| ENSG00000141622 | CUACAAA  |
| ENSG00000141622 | CUCCCAA  |
| ENSG00000141622 | CUCUAGC  |
| ENSG00000141622 | GAAACAU  |
| ENSG00000141622 | GACCUGG  |
| ENSG00000141622 | GAGAUGA  |
| ENSG00000141622 | GAGGCAG  |
| ENSG00000141622 | GAGGCUG  |
| ENSG00000141622 | GAGGUAG  |
| ENSG00000141622 | GAGUUGA  |
| ENSG00000141622 | GAUUGUA  |
| ENSG00000141622 | GAUUGUC  |
| ENSG00000141622 | GCUACAU  |
| ENSG00000141622 | GGACCUG  |
| ENSG00000141622 | GGAGGCA  |
| ENSG00000141622 | GGAGUGU  |
| ENSG00000141622 | GGAUUUC  |
| ENSG00000141622 | GGCUGCG  |
| ENSG00000141622 | GGGCCCC  |
| ENSG00000141622 | GGGGUGC  |
| ENSG00000141622 | GGGGUGG  |
| ENSG00000141622 | GUUCAUG  |
| ENSG00000141622 | UAUAAUA  |
| ENSG00000141622 | UCACACA  |
| ENSG00000141622 | UCACCAC  |
| ENSG00000141622 | UCCCUUG  |
| ENSG00000141622 | UGCAAAG  |
| ENSG00000141622 | UGCAUAG  |
| ENSG00000141622 | UGCAUUG  |
| ENSG00000141622 | UUCUAAU  |
| ENSG00000141622 | UUUGCAA  |
| ENSG00000141622 | UUUGCAC  |
| ENSG00000141639 | AAAACUG  |
| ENSG00000141639 | AAAGUGC  |
| ENSG00000141639 | AAGGCAC  |
| ENSG00000141639 | AAGUGCA  |
| ENSG00000141639 | AGCAGCU  |
| ENSG00000141639 | AUGGCAC  |
| ENSG00000141639 | GCUGGUG  |
| ENSG00000141639 | UGCAUAG  |
| ENSG00000141642 | CAGGAAC  |
| ENSG00000141644 | ACCAGCA  |
| ENSG00000141644 | AGCAGCA  |
| ENSG00000141644 | CAGGUGA  |
| ENSG00000141644 | CUGCAGC  |
| ENSG00000141644 | UGCAGCU  |
| ENSG00000141646 | AAAGUAA  |
| ENSG00000141646 | AAAUCCC  |
| ENSG00000141646 | AAGGCAC  |
| ENSG00000141646 | AAGUGCA  |
| ENSG00000141646 | ACAGUAU  |

|                 |          |
|-----------------|----------|
| ENSG00000141646 | AGCAGCU  |
| ENSG00000141646 | AGGAGCU  |
| ENSG00000141646 | AGUAGAC  |
| ENSG00000141646 | AGUGCAA  |
| ENSG00000141646 | AUAAAAGU |
| ENSG00000141646 | AUACAAG  |
| ENSG00000141646 | AUGGCUU  |
| ENSG00000141646 | AUGUAAU  |
| ENSG00000141646 | CAGCAGA  |
| ENSG00000141646 | CAGCUGG  |
| ENSG00000141646 | CAUAUUG  |
| ENSG00000141646 | CCCUGAG  |
| ENSG00000141646 | CCUUCUG  |
| ENSG00000141646 | CCUUCUU  |
| ENSG00000141646 | CUCAAAC  |
| ENSG00000141646 | CUGGAAA  |
| ENSG00000141646 | CUUUGGU  |
| ENSG00000141646 | GAAAACA  |
| ENSG00000141646 | GAGAAAU  |
| ENSG00000141646 | GAGAACC  |
| ENSG00000141646 | GAUAUGU  |
| ENSG00000141646 | GCAACUU  |
| ENSG00000141646 | GCAGAAG  |
| ENSG00000141646 | GCCUGAU  |
| ENSG00000141646 | GGAAUGU  |
| ENSG00000141646 | GGCAGUG  |
| ENSG00000141646 | GGGGCAG  |
| ENSG00000141646 | GUCUGCC  |
| ENSG00000141646 | GUCUUGC  |
| ENSG00000141646 | GUGCAA   |
| ENSG00000141646 | UACAAAG  |
| ENSG00000141646 | UAUAAAAG |
| ENSG00000141646 | UCAAGUA  |
| ENSG00000141646 | UCCCUUU  |
| ENSG00000141646 | UCUAGAG  |
| ENSG00000141646 | UCUGGAA  |
| ENSG00000141646 | UGCAAAG  |
| ENSG00000141646 | UGUCUUU  |
| ENSG00000141646 | UGUGUCA  |
| ENSG00000141646 | UUCAAGC  |
| ENSG00000141646 | UUGUGUC  |
| ENSG00000141664 | AGCAGCA  |
| ENSG00000141664 | CAAAGUG  |
| ENSG00000141664 | CAGUGCA  |
| ENSG00000141664 | GGAAGCC  |
| ENSG00000141664 | GUUAAUG  |
| ENSG00000141664 | UCCAGUU  |
| ENSG00000141664 | UCUAGAG  |
| ENSG00000141668 | AAAACUG  |
| ENSG00000141668 | AAUUGCU  |
| ENSG00000141668 | ACCCAUU  |
| ENSG00000141668 | CACAGGG  |
| ENSG00000141668 | CGUGCAU  |
| ENSG00000141668 | CUAUACA  |
| ENSG00000141668 | GGUUACC  |
| ENSG00000141668 | GUGCAA   |
| ENSG00000141668 | UCACAGG  |
| ENSG00000141668 | UCAUUUG  |
| ENSG00000141668 | UCGUGCA  |
| ENSG00000141668 | UCUUGAG  |
| ENSG00000141668 | UGCUCAC  |
| ENSG00000141668 | UGGAUAA  |
| ENSG00000141668 | UUGGUUC  |
| ENSG00000141682 | GAGGUAG  |

|                 |         |
|-----------------|---------|
| ENSG00000141682 | GAGGUAU |
| ENSG00000141682 | GUAGUGU |
| ENSG00000141682 | UCACAUU |
| ENSG00000141699 | AAGUGCU |
| ENSG00000141699 | AUACAAG |
| ENSG00000141699 | CAAGAGC |
| ENSG00000141699 | CAGCAA  |
| ENSG00000141699 | CUCCAA  |
| ENSG00000141699 | GAGGAUA |
| ENSG00000141699 | GGAGGAG |
| ENSG00000141699 | GGCUCUG |
| ENSG00000141699 | UCACAAG |
| ENSG00000141699 | UCACAGG |
| ENSG00000141699 | UCACAGU |
| ENSG00000141699 | UCAUACA |
| ENSG00000141699 | UCUCCAA |
| ENSG00000141736 | AAAAACC |
| ENSG00000141736 | UUUGCAA |
| ENSG00000141738 | ACUGGCC |
| ENSG00000141738 | UACAAAG |
| ENSG00000141750 | CUGGGGG |
| ENSG00000141750 | GAAACAU |
| ENSG00000141750 | GGCAGCG |
| ENSG00000141750 | GGCAGUG |
| ENSG00000141750 | GGCAUUG |
| ENSG00000141750 | GUGUGGC |
| ENSG00000141750 | UAUUGCU |
| ENSG00000141750 | UCAAGUA |
| ENSG00000141750 | UGAGAAU |
| ENSG00000141750 | UUCAAGC |
| ENSG00000141753 | AAGACAU |
| ENSG00000141753 | CCUGCUG |
| ENSG00000141753 | CUGCAGC |
| ENSG00000141753 | CUGGAAA |
| ENSG00000141753 | GGAGGCA |
| ENSG00000141756 | CAGCAGA |
| ENSG00000141837 | AAAACUG |
| ENSG00000141837 | ACAAGGU |
| ENSG00000141837 | AGGGUUG |
| ENSG00000141837 | CACAGUG |
| ENSG00000141837 | CUGCAGC |
| ENSG00000141837 | GCAGGAC |
| ENSG00000141837 | UAAUAGU |
| ENSG00000141837 | UCACAGG |
| ENSG00000141837 | UCUCAAG |
| ENSG00000141837 | UUCAAAU |
| ENSG00000141837 | UUUCAAC |
| ENSG00000141837 | UUUUUGC |
| ENSG00000141867 | AAAUUUC |
| ENSG00000141867 | AACACUG |
| ENSG00000141867 | ACAUAGA |
| ENSG00000141867 | CUGGAAA |
| ENSG00000141867 | GAAGGAA |
| ENSG00000141867 | GGCUCUG |
| ENSG00000141867 | UCCCUUU |
| ENSG00000141867 | UCUGGAA |
| ENSG00000141867 | UUCCAUA |
| ENSG00000141867 | UUGGCAA |
| ENSG00000141905 | AGCAGCA |
| ENSG00000141905 | CUCCAA  |
| ENSG00000141905 | GAGAUGA |
| ENSG00000141956 | AUUGCAC |
| ENSG00000141956 | CAGCAA  |
| ENSG00000141956 | CAGUGCA |

|                 |          |
|-----------------|----------|
| ENSG00000141956 | CCAGCAU  |
| ENSG00000141956 | CUACAGU  |
| ENSG00000141985 | AAUACUG  |
| ENSG00000141985 | GGAAUGU  |
| ENSG00000141985 | GUGCUUG  |
| ENSG00000141985 | UAAUACA  |
| ENSG00000141985 | UGUGCUU  |
| ENSG00000142002 | AAAGAAU  |
| ENSG00000142002 | CAGUGCA  |
| ENSG00000142002 | CCCCUGG  |
| ENSG00000142002 | CCCUGAG  |
| ENSG00000142002 | GGUGGUU  |
| ENSG00000142002 | UAUAAAAG |
| ENSG00000142002 | UGUGCUU  |
| ENSG00000142039 | AAAGAGG  |
| ENSG00000142039 | ACUCAGG  |
| ENSG00000142039 | CUGGGGG  |
| ENSG00000142039 | GGAGUGU  |
| ENSG00000142039 | GGCAGGG  |
| ENSG00000142039 | GGGGAGC  |
| ENSG00000142039 | UCCACA   |
| ENSG00000142039 | UCCACC   |
| ENSG00000142065 | GAGGCAG  |
| ENSG00000142065 | GAGUGUG  |
| ENSG00000142065 | GCUAGCA  |
| ENSG00000142065 | UCACAUU  |
| ENSG00000142149 | AAAAGUA  |
| ENSG00000142149 | AAAGAAU  |
| ENSG00000142149 | AAAGUAC  |
| ENSG00000142149 | AACAUUC  |
| ENSG00000142149 | AAUUAUU  |
| ENSG00000142149 | AGCUGCC  |
| ENSG00000142149 | AUAAUAC  |
| ENSG00000142149 | AUCCUUG  |
| ENSG00000142149 | AUGUCUG  |
| ENSG00000142149 | CACAGUG  |
| ENSG00000142149 | UAUAAUA  |
| ENSG00000142149 | UCACAGG  |
| ENSG00000142149 | UCACAGU  |
| ENSG00000142149 | UCAUAGA  |
| ENSG00000142149 | UCUGGAA  |
| ENSG00000142149 | UGCAUUG  |
| ENSG00000142149 | UUGGUUC  |
| ENSG00000142166 | GAAAACA  |
| ENSG00000142168 | GGAAUGU  |
| ENSG00000142188 | AAGGCAC  |
| ENSG00000142188 | AAGUGCA  |
| ENSG00000142188 | AAUUAUU  |
| ENSG00000142188 | AGCUGCC  |
| ENSG00000142188 | AUCCCUU  |
| ENSG00000142188 | AUUGCAC  |
| ENSG00000142188 | CUAGUCC  |
| ENSG00000142188 | CUGGCUC  |
| ENSG00000142188 | GAGCUGC  |
| ENSG00000142188 | UAUUGCU  |
| ENSG00000142188 | UUGGCAC  |
| ENSG00000142192 | AAAGUGC  |
| ENSG00000142192 | AAGUGCU  |
| ENSG00000142192 | UACAGUU  |
| ENSG00000142197 | ACAAGGU  |
| ENSG00000142208 | AAAAAUC  |
| ENSG00000142208 | AAGUGCU  |
| ENSG00000142235 | AAGUUGU  |
| ENSG00000142235 | GGCAGUG  |

|                 |          |
|-----------------|----------|
| ENSG00000142235 | UCAUUUG  |
| ENSG00000142235 | UUGGCAA  |
| ENSG00000142235 | UUGGCAC  |
| ENSG00000142279 | AAAGAAU  |
| ENSG00000142279 | AAGUCAC  |
| ENSG00000142279 | AGCAGCU  |
| ENSG00000142303 | ACAGUAC  |
| ENSG00000142303 | AGCACCA  |
| ENSG00000142303 | AGUGCUG  |
| ENSG00000142303 | CACAGUG  |
| ENSG00000142303 | CUGGGGG  |
| ENSG00000142303 | CUUCACC  |
| ENSG00000142303 | UCACAGG  |
| ENSG00000142319 | AACAGUC  |
| ENSG00000142347 | GAGGUAG  |
| ENSG00000142347 | GGCAGGG  |
| ENSG00000142449 | CAGUGCA  |
| ENSG00000142453 | AAGUGUG  |
| ENSG00000142453 | ACAUUCA  |
| ENSG00000142453 | AGGGUCU  |
| ENSG00000142453 | GCAGCAU  |
| ENSG00000142453 | GCUGUCU  |
| ENSG00000142453 | GUCAGUU  |
| ENSG00000142453 | GUGAGGU  |
| ENSG00000142453 | UCAUUUG  |
| ENSG00000142453 | UUGACAC  |
| ENSG00000142453 | UUGGUUC  |
| ENSG00000142459 | AAAUGGU  |
| ENSG00000142459 | AGUGUGC  |
| ENSG00000142459 | CUGCAGG  |
| ENSG00000142459 | CUUUGGU  |
| ENSG00000142459 | UUGGCAC  |
| ENSG00000142459 | UUGGUUC  |
| ENSG00000142528 | AAGUGCA  |
| ENSG00000142528 | CUGGCUC  |
| ENSG00000142528 | GAGGUAG  |
| ENSG00000142528 | GAGGUAU  |
| ENSG00000142539 | UCUGGAA  |
| ENSG00000142541 | AACAGUC  |
| ENSG00000142541 | GGAGGAG  |
| ENSG00000142556 | CCAGUGC  |
| ENSG00000142599 | AACUACU  |
| ENSG00000142599 | AAGGCAC  |
| ENSG00000142599 | AAGUCAC  |
| ENSG00000142599 | AAUCUCA  |
| ENSG00000142599 | ACUGUGU  |
| ENSG00000142599 | AGCACCA  |
| ENSG00000142599 | AUAAAGU  |
| ENSG00000142599 | AUGUAAU  |
| ENSG00000142599 | CAA AUGC |
| ENSG00000142599 | CACAGUG  |
| ENSG00000142599 | CAGUCCA  |
| ENSG00000142599 | CUUGGAG  |
| ENSG00000142599 | CUUUGGU  |
| ENSG00000142599 | GCAGAAG  |
| ENSG00000142599 | GGAAUGU  |
| ENSG00000142599 | GUAGUGU  |
| ENSG00000142599 | UACAAAG  |
| ENSG00000142599 | UAGUGAG  |
| ENSG00000142599 | UCACAAG  |
| ENSG00000142599 | UCCCUU   |
| ENSG00000142599 | UGUCUGC  |
| ENSG00000142599 | UUCAAA   |
| ENSG00000142599 | UUCCUAG  |



|                 |         |
|-----------------|---------|
| ENSG00000142599 | UUUUUGC |
| ENSG00000142606 | GGGCGUG |
| ENSG00000142606 | UGAAGCU |
| ENSG00000142611 | AACAAAC |
| ENSG00000142611 | AACAUUC |
| ENSG00000142611 | AAGUGCU |
| ENSG00000142611 | AAUCACU |
| ENSG00000142611 | AAUCUCA |
| ENSG00000142611 | AAUGCCC |
| ENSG00000142611 | AAUUAUU |
| ENSG00000142611 | ACAGUAC |
| ENSG00000142611 | ACUGUUU |
| ENSG00000142611 | AGCUGCC |
| ENSG00000142611 | AGUGCUU |
| ENSG00000142611 | AUAUUAU |
| ENSG00000142611 | AUCACUA |
| ENSG00000142611 | AUGGCUU |
| ENSG00000142611 | AUUCAUU |
| ENSG00000142611 | AUUGCAC |
| ENSG00000142611 | CACAAUG |
| ENSG00000142611 | CACAGUG |
| ENSG00000142611 | CAGCAGG |
| ENSG00000142611 | CCAGUGC |
| ENSG00000142611 | CCAGUGU |
| ENSG00000142611 | CCUUCAU |
| ENSG00000142611 | CUAUACA |
| ENSG00000142611 | CUCUUCC |
| ENSG00000142611 | CUUCACC |
| ENSG00000142611 | GAAAACA |
| ENSG00000142611 | GAUAUGU |
| ENSG00000142611 | GAUUGUA |
| ENSG00000142611 | GAUUGUC |
| ENSG00000142611 | GGGUUUA |
| ENSG00000142611 | GGUUUAC |
| ENSG00000142611 | GUAACAG |
| ENSG00000142611 | UACAGUU |
| ENSG00000142611 | UAUUGCU |
| ENSG00000142611 | UCACAGU |
| ENSG00000142611 | UCCCACA |
| ENSG00000142611 | UGCAUAG |
| ENSG00000142611 | UGGCCCU |
| ENSG00000142611 | UGUAUAA |
| ENSG00000142611 | UGUCUGC |
| ENSG00000142611 | UGUCUGG |
| ENSG00000142611 | UUGGCAA |
| ENSG00000142611 | UUGGCAC |
| ENSG00000142611 | UUGGUCC |
| ENSG00000142611 | UUGUUCG |
| ENSG00000142623 | CUCCCAC |
| ENSG00000142623 | CUCUGGG |
| ENSG00000142627 | AAGUGCU |
| ENSG00000142634 | AAGUAGC |
| ENSG00000142634 | AAUUUUA |
| ENSG00000142634 | AUCGUAC |
| ENSG00000142634 | AUUCAUU |
| ENSG00000142634 | GAGGUAG |
| ENSG00000142634 | GCUUCCU |
| ENSG00000142634 | GUGAGGU |
| ENSG00000142634 | UGCAUAG |
| ENSG00000142634 | UGCAUUA |
| ENSG00000142634 | UGUAUAA |
| ENSG00000142655 | UAUUACC |
| ENSG00000142655 | UCACACA |
| ENSG00000142657 | GGAAUGU |

|                 |         |
|-----------------|---------|
| ENSG00000142669 | AAUGUUG |
| ENSG00000142669 | CCUUCAU |
| ENSG00000142669 | GCGGGGC |
| ENSG00000142669 | GGAAUGU |
| ENSG00000142669 | UUGGCAA |
| ENSG00000142669 | UUGGCAC |
| ENSG00000142677 | GGCAGGG |
| ENSG00000142686 | CUCCAGC |
| ENSG00000142686 | UCUCCAA |
| ENSG00000142700 | AAAAACC |
| ENSG00000142700 | AAGUGCA |
| ENSG00000142700 | ACUGGCU |
| ENSG00000142700 | AUAUAAC |
| ENSG00000142700 | CAAAGUG |
| ENSG00000142700 | CUGGCUC |
| ENSG00000142700 | CUUGUAU |
| ENSG00000142700 | GCAACGA |
| ENSG00000142700 | GCACCAU |
| ENSG00000142700 | GGCUCAG |
| ENSG00000142700 | UAAUACA |
| ENSG00000142700 | UGCAAAG |
| ENSG00000142784 | AAACUGU |
| ENSG00000142784 | AAAUGGU |
| ENSG00000142784 | AAGUUGU |
| ENSG00000142784 | ACUGCAG |
| ENSG00000142784 | AGCAGCA |
| ENSG00000142784 | AGCAGCU |
| ENSG00000142784 | AGCUGCC |
| ENSG00000142784 | CACAGUG |
| ENSG00000142784 | CCAGUGU |
| ENSG00000142784 | CCUUCAU |
| ENSG00000142784 | CUGCAGG |
| ENSG00000142784 | CUGCCCC |
| ENSG00000142784 | CUUCACC |
| ENSG00000142784 | CUUUGGU |
| ENSG00000142784 | GCCUUA  |
| ENSG00000142784 | GGAGGAG |
| ENSG00000142784 | GGCUCAG |
| ENSG00000142784 | GGGCCCC |
| ENSG00000142784 | GUCUCUG |
| ENSG00000142784 | UCACCAC |
| ENSG00000142784 | UGGCCCU |
| ENSG00000142798 | ACCACAG |
| ENSG00000142798 | AGCACCA |
| ENSG00000142798 | AGCAGCG |
| ENSG00000142798 | AGCAGCU |
| ENSG00000142798 | CAGCAA  |
| ENSG00000142798 | CAGGCUC |
| ENSG00000142798 | CGGGGAU |
| ENSG00000142798 | CUUACAG |
| ENSG00000142798 | GAGCUGC |
| ENSG00000142798 | UACAAAG |
| ENSG00000142856 | AAAGUUU |
| ENSG00000142864 | AAAGCUG |
| ENSG00000142864 | AAAUCCC |
| ENSG00000142864 | AACUGGU |
| ENSG00000142864 | ACACACC |
| ENSG00000142864 | ACCAGCA |
| ENSG00000142864 | AGCACCA |
| ENSG00000142864 | AGCAGCA |
| ENSG00000142864 | AGGGUUG |
| ENSG00000142864 | AUAAAGU |
| ENSG00000142864 | AUCAUAC |
| ENSG00000142864 | AUGGCAC |

|                 |         |
|-----------------|---------|
| ENSG00000142864 | CAAAACU |
| ENSG00000142864 | CAAAGCA |
| ENSG00000142864 | CAAAGUG |
| ENSG00000142864 | CACACCG |
| ENSG00000142864 | CACAGUG |
| ENSG00000142864 | CACCAGC |
| ENSG00000142864 | CAGUCUG |
| ENSG00000142864 | CAGUGCA |
| ENSG00000142864 | CCAGUGC |
| ENSG00000142864 | CUCUGGG |
| ENSG00000142864 | CUUUGGU |
| ENSG00000142864 | GAGAAGA |
| ENSG00000142864 | GCAGAAG |
| ENSG00000142864 | GCCCUUA |
| ENSG00000142864 | GCUGUCU |
| ENSG00000142864 | GGAGGCA |
| ENSG00000142864 | GGUUGUC |
| ENSG00000142864 | GUGCUUG |
| ENSG00000142864 | UAUUACC |
| ENSG00000142864 | UAUUGCU |
| ENSG00000142864 | UCACAGG |
| ENSG00000142864 | UCAUGAU |
| ENSG00000142864 | UCAUUUG |
| ENSG00000142864 | UGUCUGC |
| ENSG00000142864 | UGUGCUU |
| ENSG00000142864 | UUCAAGC |
| ENSG00000142864 | UUGGUUC |
| ENSG00000142864 | UUGUUCG |
| ENSG00000142864 | UUUGCAA |
| ENSG00000142867 | UUUCAAC |
| ENSG00000142871 | AAUUAAU |
| ENSG00000142871 | CCAGUAC |
| ENSG00000142871 | GCUACAU |
| ENSG00000142871 | UCCAGUU |
| ENSG00000142875 | AAAGUGC |
| ENSG00000142875 | AAGUGCU |
| ENSG00000142875 | GUCAGUU |
| ENSG00000142892 | AAAGCUG |
| ENSG00000142892 | UCCCACC |
| ENSG00000142910 | CUGGGGG |
| ENSG00000142920 | UAAGACU |
| ENSG00000142920 | UGCAUAG |
| ENSG00000142920 | UGCAUAU |
| ENSG00000142949 | AAAAAUC |
| ENSG00000142949 | AACAAAC |
| ENSG00000142949 | ACAAGGU |
| ENSG00000142949 | ACAUUAC |
| ENSG00000142949 | ACUGUGU |
| ENSG00000142949 | AUGAUGC |
| ENSG00000142949 | AUGCACC |
| ENSG00000142949 | AUGGCUU |
| ENSG00000142949 | CCAGUAC |
| ENSG00000142949 | CCGAGC  |
| ENSG00000142949 | GAGAAGA |
| ENSG00000142949 | GGACCUG |
| ENSG00000142949 | GGCCUG  |
| ENSG00000142949 | GUCUUGC |
| ENSG00000142949 | UGGCCCU |
| ENSG00000142949 | UUAUGCA |
| ENSG00000142961 | AAAGCUG |
| ENSG00000142961 | AAGUCUU |
| ENSG00000142961 | AGGCAGG |
| ENSG00000142961 | AUAAAGU |
| ENSG00000142961 | GGAAUGU |

|                 |          |
|-----------------|----------|
| ENSG00000142961 | GGAGGCA  |
| ENSG00000142961 | GGCUCAG  |
| ENSG00000142961 | GGGAGCU  |
| ENSG00000143006 | AUUCAUU  |
| ENSG00000143006 | CCUGCUG  |
| ENSG00000143006 | GCAGAAG  |
| ENSG00000143006 | GCCUGGG  |
| ENSG00000143006 | UCAUUCG  |
| ENSG00000143013 | AAAGAGC  |
| ENSG00000143013 | AAGGCAC  |
| ENSG00000143013 | AAGGUGC  |
| ENSG00000143013 | ACAAUAU  |
| ENSG00000143013 | ACUAGAU  |
| ENSG00000143013 | AUACAAG  |
| ENSG00000143013 | CCAGUGC  |
| ENSG00000143013 | CUACAAA  |
| ENSG00000143013 | CUCCCAA  |
| ENSG00000143013 | CUCCCAC  |
| ENSG00000143013 | GAAACAU  |
| ENSG00000143013 | GGGAUCG  |
| ENSG00000143013 | UGCCUG   |
| ENSG00000143013 | UGGGAUC  |
| ENSG00000143013 | UUCUGCA  |
| ENSG00000143013 | UUGUGAC  |
| ENSG00000143028 | ACUGUUU  |
| ENSG00000143028 | CACUGUU  |
| ENSG00000143028 | CAGUAGA  |
| ENSG00000143028 | CCUUCAU  |
| ENSG00000143028 | CGGCCUG  |
| ENSG00000143028 | GAAAACA  |
| ENSG00000143028 | GCUGUCU  |
| ENSG00000143032 | UGGGGGA  |
| ENSG00000143033 | ACCCUGU  |
| ENSG00000143033 | AGCUGCC  |
| ENSG00000143033 | UCACACA  |
| ENSG00000143033 | UGAGAAG  |
| ENSG00000143061 | AAGGUGC  |
| ENSG00000143061 | AAUACUG  |
| ENSG00000143061 | ACAGGUG  |
| ENSG00000143061 | ACCUGGA  |
| ENSG00000143061 | ACUGGCC  |
| ENSG00000143061 | AGAUGUG  |
| ENSG00000143061 | AGUGGUU  |
| ENSG00000143061 | AUAU AAC |
| ENSG00000143061 | CAAAGCA  |
| ENSG00000143061 | CAAAGUG  |
| ENSG00000143061 | CACAGUG  |
| ENSG00000143061 | CUACAAA  |
| ENSG00000143061 | GAAAACA  |
| ENSG00000143061 | GCACCAU  |
| ENSG00000143061 | UUCCAUA  |
| ENSG00000143061 | UUGGCAC  |
| ENSG00000143061 | UUUUUGC  |
| ENSG00000143067 | AAGUCUU  |
| ENSG00000143067 | AAGUGCU  |
| ENSG00000143067 | CAGCAAA  |
| ENSG00000143067 | CUACAGU  |
| ENSG00000143067 | CUAUACA  |
| ENSG00000143067 | GAGAACC  |
| ENSG00000143067 | GAGGUAG  |
| ENSG00000143067 | UCAAGUA  |
| ENSG00000143067 | UGGCCCU  |
| ENSG00000143067 | UGUGCUU  |
| ENSG00000143067 | UUGGCAC  |

|                 |         |
|-----------------|---------|
| ENSG00000143079 | CAGUAGA |
| ENSG00000143079 | CUGGAAA |
| ENSG00000143079 | GGAAUGU |
| ENSG00000143079 | GUUCAUG |
| ENSG00000143079 | UCACAUU |
| ENSG00000143079 | UCUGGAA |
| ENSG00000143079 | UUCUGCA |
| ENSG00000143079 | UUGGUUC |
| ENSG00000143093 | ACUGCAG |
| ENSG00000143093 | CUGCAGC |
| ENSG00000143093 | GCAGCAU |
| ENSG00000143107 | UGCCUG  |
| ENSG00000143126 | AAACUGU |
| ENSG00000143126 | AAAGUGC |
| ENSG00000143126 | AAGUGCA |
| ENSG00000143126 | ACUGGCC |
| ENSG00000143126 | AUAUUAU |
| ENSG00000143126 | CAAAGUG |
| ENSG00000143126 | CAGCAA  |
| ENSG00000143126 | CAGCAGA |
| ENSG00000143126 | CCUGAG  |
| ENSG00000143126 | CCUUCUG |
| ENSG00000143126 | CUCUCC  |
| ENSG00000143126 | CUGCCCC |
| ENSG00000143126 | GAGGCUG |
| ENSG00000143126 | GCAGCAU |
| ENSG00000143126 | GCAGGAC |
| ENSG00000143126 | GUCUUGC |
| ENSG00000143126 | GUGCUUG |
| ENSG00000143126 | GUUCAUG |
| ENSG00000143126 | UCCUCG  |
| ENSG00000143126 | UUGGCAC |
| ENSG00000143127 | AAGUCUU |
| ENSG00000143127 | ACUCAA  |
| ENSG00000143127 | AGCUGCC |
| ENSG00000143127 | CAGCAGA |
| ENSG00000143127 | CUCAGGG |
| ENSG00000143127 | CUGUUGA |
| ENSG00000143127 | CUUGUGU |
| ENSG00000143127 | GAAUUGU |
| ENSG00000143127 | GCAGAAG |
| ENSG00000143127 | GGCAGUG |
| ENSG00000143127 | GUCUCUG |
| ENSG00000143127 | UCCUUGC |
| ENSG00000143127 | UGCCAGC |
| ENSG00000143140 | GAGGCUG |
| ENSG00000143140 | UCACAGG |
| ENSG00000143140 | UCACAGU |
| ENSG00000143140 | UCCAGUU |
| ENSG00000143153 | AAAUGGU |
| ENSG00000143153 | AAUUAUU |
| ENSG00000143153 | ACAUUCA |
| ENSG00000143153 | AGACCA  |
| ENSG00000143153 | CAAGAGC |
| ENSG00000143153 | CUUUGGU |
| ENSG00000143153 | UGCAUUG |
| ENSG00000143153 | UUCUUGU |
| ENSG00000143153 | UUGGUUC |
| ENSG00000143153 | UUUCAAC |
| ENSG00000143155 | AAGACAU |
| ENSG00000143155 | UCACAUU |
| ENSG00000143156 | AGUGCAA |
| ENSG00000143156 | CCAGGAG |
| ENSG00000143157 | AAAGUUU |

|                 |         |
|-----------------|---------|
| ENSG00000143157 | CCAGUGU |
| ENSG00000143157 | CUGCAGG |
| ENSG00000143157 | GGAAGAC |
| ENSG00000143157 | UCCAGUU |
| ENSG00000143158 | CAGGAAC |
| ENSG00000143162 | AUGGCUU |
| ENSG00000143167 | AAUUUUA |
| ENSG00000143167 | CAAAGCA |
| ENSG00000143178 | AAAUGGU |
| ENSG00000143178 | ACAGGUG |
| ENSG00000143178 | UCACAGG |
| ENSG00000143179 | AGUAGUU |
| ENSG00000143179 | UUGGCAC |
| ENSG00000143217 | AAUACUG |
| ENSG00000143217 | AGGCAGG |
| ENSG00000143217 | CACACCU |
| ENSG00000143217 | CAGCAGG |
| ENSG00000143217 | CUCCAGC |
| ENSG00000143217 | CUCUGGG |
| ENSG00000143217 | CUGGGGG |
| ENSG00000143217 | GAGCCCU |
| ENSG00000143217 | GGAGGCA |
| ENSG00000143217 | GGGGUCC |
| ENSG00000143217 | UUGGAGG |
| ENSG00000143222 | AGCAGCU |
| ENSG00000143248 | AGUAACA |
| ENSG00000143248 | GGUUACC |
| ENSG00000143248 | GUUAAUG |
| ENSG00000143252 | AAAGCUG |
| ENSG00000143252 | AAUCUCU |
| ENSG00000143252 | CUCAGGG |
| ENSG00000143252 | CUCUAGC |
| ENSG00000143252 | CUUCUCU |
| ENSG00000143252 | GCCCUUA |
| ENSG00000143252 | GGCAGUG |
| ENSG00000143252 | UCCUCU  |
| ENSG00000143258 | AAAUUUC |
| ENSG00000143258 | GAGGUAG |
| ENSG00000143258 | GAGGUAU |
| ENSG00000143258 | GUCUCUG |
| ENSG00000143294 | AAAAAUC |
| ENSG00000143294 | GGGGUCC |
| ENSG00000143294 | UUUCAAC |
| ENSG00000143297 | AUUCAUU |
| ENSG00000143297 | UCAUUCG |
| ENSG00000143315 | AUCCUUU |
| ENSG00000143318 | CUGCCCC |
| ENSG00000143319 | AAAUUUC |
| ENSG00000143319 | AAGGCAC |
| ENSG00000143319 | GCACCAU |
| ENSG00000143321 | AAAAACC |
| ENSG00000143321 | AAUUUUA |
| ENSG00000143321 | AGCACCA |
| ENSG00000143321 | AGCAGCA |
| ENSG00000143321 | CAGACAG |
| ENSG00000143321 | CAGCAA  |
| ENSG00000143321 | CAGCAGG |
| ENSG00000143321 | CAGGAAC |
| ENSG00000143321 | CUACAGU |
| ENSG00000143321 | GAAACAU |
| ENSG00000143321 | UGGGUGA |
| ENSG00000143321 | UGUCUGG |
| ENSG00000143321 | UUUUUGC |
| ENSG00000143322 | AAGUGCU |

|                 |         |
|-----------------|---------|
| ENSG00000143322 | AAGUGUG |
| ENSG00000143322 | AAUCCUU |
| ENSG00000143322 | AAUUUUA |
| ENSG00000143322 | ACAAUAU |
| ENSG00000143322 | ACACACU |
| ENSG00000143322 | ACAUCAC |
| ENSG00000143322 | ACAUUCA |
| ENSG00000143322 | AGCAAAA |
| ENSG00000143322 | AGGUAGU |
| ENSG00000143322 | AGUGUGC |
| ENSG00000143322 | AUUGCAC |
| ENSG00000143322 | CAGACAG |
| ENSG00000143322 | CAGUAGA |
| ENSG00000143322 | CAGUAGU |
| ENSG00000143322 | CAGUGCA |
| ENSG00000143322 | CCCUGAG |
| ENSG00000143322 | CCCUGUU |
| ENSG00000143322 | CUUUGGU |
| ENSG00000143322 | GACAACU |
| ENSG00000143322 | GAGCCCU |
| ENSG00000143322 | GAGGUAU |
| ENSG00000143322 | GAUUGUC |
| ENSG00000143322 | GCAGCAU |
| ENSG00000143322 | GCUAGCA |
| ENSG00000143322 | GGAAUGU |
| ENSG00000143322 | GUAGUGU |
| ENSG00000143322 | GUGCUUG |
| ENSG00000143322 | UCACAGG |
| ENSG00000143322 | UCACAUU |
| ENSG00000143322 | UCCCUGU |
| ENSG00000143322 | UCUCCAA |
| ENSG00000143322 | UCUUGAG |
| ENSG00000143322 | UGUGCUU |
| ENSG00000143322 | UUAUGCA |
| ENSG00000143322 | UUGGCAA |
| ENSG00000143322 | UUGGUCC |
| ENSG00000143324 | AAAAGUA |
| ENSG00000143324 | AAAGAGG |
| ENSG00000143324 | AACUGGU |
| ENSG00000143324 | AAGUAGC |
| ENSG00000143324 | AGCAGCA |
| ENSG00000143324 | AGUGCCU |
| ENSG00000143324 | AUUGCAC |
| ENSG00000143324 | CAAAACU |
| ENSG00000143324 | CACAGUG |
| ENSG00000143324 | CCAGUGC |
| ENSG00000143324 | CCGGUUC |
| ENSG00000143324 | CCUUCAU |
| ENSG00000143324 | CUGGAAA |
| ENSG00000143324 | GAAGGUC |
| ENSG00000143324 | GAGGUAU |
| ENSG00000143324 | GAUUGGU |
| ENSG00000143324 | GAUUGUC |
| ENSG00000143324 | UCCCACC |
| ENSG00000143324 | UUGGAGG |
| ENSG00000143324 | UUGGCAA |
| ENSG00000143324 | UUUCAAC |
| ENSG00000143333 | ACAGUAU |
| ENSG00000143333 | AGGAGCU |
| ENSG00000143333 | CUCUUCC |
| ENSG00000143333 | UUGUUCG |
| ENSG00000143337 | GAGGCAG |
| ENSG00000143337 | UCCUAUA |
| ENSG00000143337 | UGCAUAG |

|                 |          |
|-----------------|----------|
| ENSG00000143340 | CUGCAGC  |
| ENSG00000143341 | CCAGUGC  |
| ENSG00000143344 | AAUACUG  |
| ENSG00000143344 | ACAGUAC  |
| ENSG00000143344 | ACUGGCC  |
| ENSG00000143344 | ACUGGCU  |
| ENSG00000143344 | AGCAGCU  |
| ENSG00000143344 | AUAU AAC |
| ENSG00000143344 | AUUGCAC  |
| ENSG00000143344 | GUAAACA  |
| ENSG00000143363 | AACAAAC  |
| ENSG00000143363 | AGCAGCU  |
| ENSG00000143363 | AUGCAUU  |
| ENSG00000143363 | CAAAACU  |
| ENSG00000143363 | CUUUGGU  |
| ENSG00000143363 | GCUACAU  |
| ENSG00000143363 | UACAAAG  |
| ENSG00000143365 | AAGUGCA  |
| ENSG00000143365 | AUGGCAC  |
| ENSG00000143365 | CCUUCUG  |
| ENSG00000143365 | GAGGCUG  |
| ENSG00000143365 | GAGGUAG  |
| ENSG00000143365 | UGUGUCA  |
| ENSG00000143367 | AGCAGCA  |
| ENSG00000143367 | AGGGAGG  |
| ENSG00000143367 | CAGCAGA  |
| ENSG00000143367 | GAAGGAA  |
| ENSG00000143368 | UUGGUCC  |
| ENSG00000143373 | AAGGCAC  |
| ENSG00000143373 | ACUGCAG  |
| ENSG00000143373 | CUGCAGG  |
| ENSG00000143373 | UAUUACC  |
| ENSG00000143373 | UGAAAGG  |
| ENSG00000143375 | AAGGCAC  |
| ENSG00000143375 | GAGGUAU  |
| ENSG00000143375 | GGGGCAG  |
| ENSG00000143375 | GUGCAAA  |
| ENSG00000143375 | UCCUGU   |
| ENSG00000143376 | AAAAACC  |
| ENSG00000143376 | AAAAAUC  |
| ENSG00000143376 | AAAGGUA  |
| ENSG00000143376 | AAAGUUU  |
| ENSG00000143376 | AACACUG  |
| ENSG00000143376 | ACAAGGU  |
| ENSG00000143376 | ACAUUAC  |
| ENSG00000143376 | ACUGCAU  |
| ENSG00000143376 | ACUGGCC  |
| ENSG00000143376 | AGAUAAA  |
| ENSG00000143376 | AGUGCAA  |
| ENSG00000143376 | AGUGGUU  |
| ENSG00000143376 | CAGUGCA  |
| ENSG00000143376 | CCCUGAG  |
| ENSG00000143376 | CCCUGUU  |
| ENSG00000143376 | CCUGCUG  |
| ENSG00000143376 | CCUUCAU  |
| ENSG00000143376 | CUCAGGG  |
| ENSG00000143376 | CUGGGCA  |
| ENSG00000143376 | CUUCACC  |
| ENSG00000143376 | GAGGUAU  |
| ENSG00000143376 | GCAGGUU  |
| ENSG00000143376 | GGCUCAG  |
| ENSG00000143376 | GGUUACC  |
| ENSG00000143376 | GUAAACA  |
| ENSG00000143376 | GUGCAAA  |



|                 |         |
|-----------------|---------|
| ENSG00000143376 | GUUAAUG |
| ENSG00000143376 | UACAGUU |
| ENSG00000143376 | UAUUGCU |
| ENSG00000143376 | UCAUAGA |
| ENSG00000143376 | UCUGGAA |
| ENSG00000143376 | UGCAAAG |
| ENSG00000143376 | UGCAGCU |
| ENSG00000143376 | UGCCUG  |
| ENSG00000143376 | UUAGAGA |
| ENSG00000143379 | AGCACCA |
| ENSG00000143379 | AGGAGCU |
| ENSG00000143379 | GCUAGCA |
| ENSG00000143379 | UUCAAGC |
| ENSG00000143384 | AAAAAUC |
| ENSG00000143384 | AAAGGUA |
| ENSG00000143384 | AAGACAU |
| ENSG00000143384 | AAUUAUU |
| ENSG00000143384 | ACAUUCA |
| ENSG00000143384 | AGCACCA |
| ENSG00000143384 | AGGCAGG |
| ENSG00000143384 | AGUACUG |
| ENSG00000143384 | AUGGCUU |
| ENSG00000143384 | AUUGCAC |
| ENSG00000143384 | GCACCAU |
| ENSG00000143384 | GGCAGGG |
| ENSG00000143384 | UCCUGU  |
| ENSG00000143384 | UUGGUCC |
| ENSG00000143387 | GCACCAU |
| ENSG00000143390 | AAGUGCA |
| ENSG00000143390 | ACCUGGA |
| ENSG00000143390 | CACAGGG |
| ENSG00000143390 | CCCUGAG |
| ENSG00000143390 | CCUUCUG |
| ENSG00000143390 | GAUUGGU |
| ENSG00000143390 | UCCACA  |
| ENSG00000143390 | UCCUCU  |
| ENSG00000143393 | AAAAAUC |
| ENSG00000143393 | AAUACUG |
| ENSG00000143393 | ACCACAG |
| ENSG00000143393 | AGCAGCA |
| ENSG00000143393 | CUCCAC  |
| ENSG00000143393 | GCAGCAU |
| ENSG00000143393 | UCCUGU  |
| ENSG00000143393 | UCUGGAG |
| ENSG00000143393 | UUCAAAU |
| ENSG00000143398 | AAGUCUU |
| ENSG00000143398 | AAUGUUG |
| ENSG00000143398 | ACAUCAC |
| ENSG00000143398 | ACAUUAC |
| ENSG00000143398 | ACUGGCU |
| ENSG00000143398 | CAGCAA  |
| ENSG00000143398 | CCUUCUG |
| ENSG00000143398 | CUCCAC  |
| ENSG00000143398 | CUUGUAU |
| ENSG00000143398 | GGCAGCG |
| ENSG00000143398 | GGCAGUG |
| ENSG00000143398 | UCCACC  |
| ENSG00000143398 | UCCUCU  |
| ENSG00000143398 | UCCUGAG |
| ENSG00000143398 | UUCUUGU |
| ENSG00000143401 | AAAGAGC |
| ENSG00000143401 | AAAGUAU |
| ENSG00000143401 | AAAGUUU |
| ENSG00000143401 | AUGCACC |

|                 |          |
|-----------------|----------|
| ENSG00000143401 | CAAAGUG  |
| ENSG00000143401 | GGAAUGU  |
| ENSG00000143401 | GGAGGCA  |
| ENSG00000143401 | UAUAAAAG |
| ENSG00000143401 | UCUGGAG  |
| ENSG00000143401 | UGAAAUG  |
| ENSG00000143401 | UUCCUAG  |
| ENSG00000143409 | CUCAGGG  |
| ENSG00000143409 | GGGUGGU  |
| ENSG00000143409 | UACAAAG  |
| ENSG00000143409 | UGCCUG   |
| ENSG00000143409 | UGGGUGA  |
| ENSG00000143418 | AAAUGGU  |
| ENSG00000143418 | CUUUGGU  |
| ENSG00000143418 | GGAAUGU  |
| ENSG00000143418 | GGCUCUG  |
| ENSG00000143418 | GGUUUAC  |
| ENSG00000143418 | UCUGGAG  |
| ENSG00000143418 | UGGGUGA  |
| ENSG00000143418 | UUGGCAA  |
| ENSG00000143418 | UUGGCAC  |
| ENSG00000143418 | UUGGUCC  |
| ENSG00000143420 | AUAAUAC  |
| ENSG00000143420 | CUAUACA  |
| ENSG00000143420 | CUCCAUU  |
| ENSG00000143420 | GAAAACA  |
| ENSG00000143420 | GAGAUGA  |
| ENSG00000143434 | AAGGCAC  |
| ENSG00000143434 | CUGGCUC  |
| ENSG00000143437 | ACAUAGA  |
| ENSG00000143437 | ACCCUGU  |
| ENSG00000143437 | ACUGUAG  |
| ENSG00000143437 | AGCACCA  |
| ENSG00000143437 | AUAUUAU  |
| ENSG00000143437 | AUGGCUU  |
| ENSG00000143437 | GACCCUG  |
| ENSG00000143437 | GGCUGCG  |
| ENSG00000143437 | GUCAUUG  |
| ENSG00000143437 | UACAGUU  |
| ENSG00000143437 | UCACACA  |
| ENSG00000143437 | UCACAUU  |
| ENSG00000143437 | UCCAUA   |
| ENSG00000143437 | UUGGUUC  |
| ENSG00000143437 | UUUUUGC  |
| ENSG00000143442 | AAGACAU  |
| ENSG00000143442 | ACAGUAC  |
| ENSG00000143442 | CACAGGG  |
| ENSG00000143442 | GAGGUAG  |
| ENSG00000143442 | GAGGUAU  |
| ENSG00000143442 | GCUACAU  |
| ENSG00000143442 | GUCCAGA  |
| ENSG00000143442 | UAAGACG  |
| ENSG00000143442 | UAAGACU  |
| ENSG00000143442 | UAUAAAAG |
| ENSG00000143442 | UCACAUU  |
| ENSG00000143442 | UCCAGAG  |
| ENSG00000143442 | UGAAGCU  |
| ENSG00000143443 | AAAAAUC  |
| ENSG00000143443 | AUAUUAU  |
| ENSG00000143443 | CUUCUCU  |
| ENSG00000143443 | GGGUUUA  |
| ENSG00000143450 | AUUGCAC  |
| ENSG00000143457 | AAAAAUC  |
| ENSG00000143457 | GUCUCUG  |

|                 |          |
|-----------------|----------|
| ENSG00000143458 | AAACUGU  |
| ENSG00000143466 | AGGGAGG  |
| ENSG00000143466 | CCAGGAG  |
| ENSG00000143466 | GAGGUAG  |
| ENSG00000143466 | UAAUGCU  |
| ENSG00000143469 | AAAAAUC  |
| ENSG00000143469 | AAAGUAU  |
| ENSG00000143469 | AACCUGU  |
| ENSG00000143469 | AAGUGCU  |
| ENSG00000143469 | AAUCUCA  |
| ENSG00000143469 | ACAGUAC  |
| ENSG00000143469 | ACAGUAU  |
| ENSG00000143469 | ACAUCAC  |
| ENSG00000143469 | AGCAAAA  |
| ENSG00000143469 | AGCACCA  |
| ENSG00000143469 | AUGAGCU  |
| ENSG00000143469 | CACUGUU  |
| ENSG00000143469 | CCUGCUG  |
| ENSG00000143469 | CUGGAAA  |
| ENSG00000143469 | CUUUGGU  |
| ENSG00000143469 | GCUUCCU  |
| ENSG00000143469 | UAUAAAAG |
| ENSG00000143469 | UGAAAGG  |
| ENSG00000143469 | UGACAUC  |
| ENSG00000143469 | UGAGGAC  |
| ENSG00000143469 | UUAGAGA  |
| ENSG00000143469 | UUCUAAU  |
| ENSG00000143469 | UUUCAAC  |
| ENSG00000143494 | AAAAACC  |
| ENSG00000143494 | AAGACAU  |
| ENSG00000143494 | AAGUGCA  |
| ENSG00000143494 | AGCACCA  |
| ENSG00000143494 | AUGGCUU  |
| ENSG00000143494 | CAGUGCA  |
| ENSG00000143494 | CUUGUGU  |
| ENSG00000143494 | GAGGUAG  |
| ENSG00000143494 | GAGGUAU  |
| ENSG00000143494 | GGGUAAG  |
| ENSG00000143494 | GUGCUUG  |
| ENSG00000143494 | UAAUAUC  |
| ENSG00000143494 | UGCAAAG  |
| ENSG00000143494 | UGCAUAG  |
| ENSG00000143494 | UGCUGAC  |
| ENSG00000143499 | UGCAUAG  |
| ENSG00000143507 | ACAAGGU  |
| ENSG00000143507 | ACAUUCA  |
| ENSG00000143507 | UAUUGCU  |
| ENSG00000143514 | AAUCCUU  |
| ENSG00000143514 | GUCAUUG  |
| ENSG00000143515 | AAACUGU  |
| ENSG00000143515 | ACAUUCA  |
| ENSG00000143515 | AUAAUAC  |
| ENSG00000143515 | CAGCAGG  |
| ENSG00000143515 | CUCUGGG  |
| ENSG00000143515 | GAGAACC  |
| ENSG00000143515 | GAGGGGC  |
| ENSG00000143515 | GCAGGAC  |
| ENSG00000143515 | GUAAACA  |
| ENSG00000143515 | GUGGCC   |
| ENSG00000143515 | GUGUCAC  |
| ENSG00000143515 | UAUAAAAG |
| ENSG00000143515 | UCUCACC  |
| ENSG00000143515 | UGGUACC  |
| ENSG00000143515 | UUCCUCG  |

|                 |         |
|-----------------|---------|
| ENSG00000143515 | UUUGCAC |
| ENSG00000143520 | CUUGGAG |
| ENSG00000143520 | UCAUAGA |
| ENSG00000143520 | UUGUUCG |
| ENSG00000143537 | UAUUGCU |
| ENSG00000143545 | GUGCAAA |
| ENSG00000143546 | GAGGUAU |
| ENSG00000143549 | AAACGGU |
| ENSG00000143549 | AACAUUC |
| ENSG00000143549 | AAGUCAC |
| ENSG00000143549 | AAGUUGU |
| ENSG00000143549 | AGCAGCU |
| ENSG00000143549 | GGGGCAG |
| ENSG00000143549 | UCCAGAG |
| ENSG00000143553 | AGCCAGU |
| ENSG00000143553 | CAGUGCA |
| ENSG00000143553 | CCAGUGC |
| ENSG00000143553 | GUAAACA |
| ENSG00000143554 | UACAAAG |
| ENSG00000143554 | UAUUACC |
| ENSG00000143569 | AAAUUUC |
| ENSG00000143569 | AGGACAC |
| ENSG00000143569 | CACCACC |
| ENSG00000143569 | CCAUUAC |
| ENSG00000143569 | UCCUAUA |
| ENSG00000143569 | UGAAGCU |
| ENSG00000143570 | GAAACAU |
| ENSG00000143570 | GUGCUUG |
| ENSG00000143570 | UGAAAUG |
| ENSG00000143570 | UGUGCUU |
| ENSG00000143570 | UUGGCAA |
| ENSG00000143590 | AAGUCAC |
| ENSG00000143590 | AAUGCCC |
| ENSG00000143590 | ACAUUAC |
| ENSG00000143590 | CAAAGCA |
| ENSG00000143590 | CUAGUCC |
| ENSG00000143590 | CUUCACC |
| ENSG00000143590 | GAGGGGC |
| ENSG00000143590 | GGGGUCC |
| ENSG00000143590 | GUAAACA |
| ENSG00000143590 | GUGGGGA |
| ENSG00000143590 | UAGACUG |
| ENSG00000143590 | UAUUGCU |
| ENSG00000143590 | UCACAGG |
| ENSG00000143590 | UCACAGU |
| ENSG00000143590 | UCUCCAA |
| ENSG00000143590 | UGCAUAG |
| ENSG00000143590 | UGCAUUA |
| ENSG00000143590 | UGUGCGU |
| ENSG00000143603 | GGCCUG  |
| ENSG00000143603 | UAAGACG |
| ENSG00000143603 | UAAGACU |
| ENSG00000143614 | AAAAAUC |
| ENSG00000143614 | AAAAGUA |
| ENSG00000143614 | AAAGGUA |
| ENSG00000143614 | AAAGUAA |
| ENSG00000143614 | AAAGUGC |
| ENSG00000143614 | AACCGUU |
| ENSG00000143614 | AAGGCAC |
| ENSG00000143614 | AAGUGCU |
| ENSG00000143614 | AAUACUG |
| ENSG00000143614 | AAUCUCA |
| ENSG00000143614 | AAUCUCU |
| ENSG00000143614 | ACAAUAU |

|                 |         |
|-----------------|---------|
| ENSG00000143614 | ACAUUAC |
| ENSG00000143614 | ACCACAG |
| ENSG00000143614 | ACUCCAG |
| ENSG00000143614 | ACUGCAU |
| ENSG00000143614 | ACUUGGA |
| ENSG00000143614 | AGGACAC |
| ENSG00000143614 | AGGGUCU |
| ENSG00000143614 | AGUGCAA |
| ENSG00000143614 | AGUGCUG |
| ENSG00000143614 | AGUGCUU |
| ENSG00000143614 | AUAAUAC |
| ENSG00000143614 | AUCACUA |
| ENSG00000143614 | AUCAUAC |
| ENSG00000143614 | AUCCCUU |
| ENSG00000143614 | AUGCCUU |
| ENSG00000143614 | AUGGCAC |
| ENSG00000143614 | AUUCAUU |
| ENSG00000143614 | CAAAGCA |
| ENSG00000143614 | CACCACC |
| ENSG00000143614 | CAGCAAA |
| ENSG00000143614 | CAGUGCA |
| ENSG00000143614 | CCAGUAC |
| ENSG00000143614 | CCCACCU |
| ENSG00000143614 | CUCGGCG |
| ENSG00000143614 | GAAACAU |
| ENSG00000143614 | GCUGGUG |
| ENSG00000143614 | GGAGGCA |
| ENSG00000143614 | GGAGUGU |
| ENSG00000143614 | GGCAAGA |
| ENSG00000143614 | GGCAGUG |
| ENSG00000143614 | GGCUCUG |
| ENSG00000143614 | GGGGAGC |
| ENSG00000143614 | GGGUCUU |
| ENSG00000143614 | GGGUGGU |
| ENSG00000143614 | UAAUGCU |
| ENSG00000143614 | UAGGGCC |
| ENSG00000143614 | UAGGUAU |
| ENSG00000143614 | UCACAAG |
| ENSG00000143614 | UCACCAC |
| ENSG00000143614 | UCAUACA |
| ENSG00000143614 | UCCCACC |
| ENSG00000143614 | UCCCUUG |
| ENSG00000143614 | UCUGGAG |
| ENSG00000143614 | UGUAUAA |
| ENSG00000143614 | UGUCUUU |
| ENSG00000143614 | UUCAAAU |
| ENSG00000143614 | UUGACAC |
| ENSG00000143614 | UUUGCAA |
| ENSG00000143614 | UUUGCAC |
| ENSG00000143621 | UUUCAAC |
| ENSG00000143622 | AAAGAGC |
| ENSG00000143622 | ACUGGAU |
| ENSG00000143622 | CUGGACU |
| ENSG00000143622 | UCACAGG |
| ENSG00000143622 | UGGACUG |
| ENSG00000143622 | UUCUAAU |
| ENSG00000143624 | AAAAACC |
| ENSG00000143624 | CAGUCCA |
| ENSG00000143624 | GUCAUUG |
| ENSG00000143630 | ACUUGGA |
| ENSG00000143630 | CUAGGCU |
| ENSG00000143630 | GAGAAGA |
| ENSG00000143630 | GUGCUUG |
| ENSG00000143630 | UGAGAAG |

|                 |         |
|-----------------|---------|
| ENSG00000143632 | AACAAAC |
| ENSG00000143632 | CACAGGG |
| ENSG00000143632 | UCCUGAG |
| ENSG00000143641 | AAAGUAC |
| ENSG00000143641 | AAAGUAU |
| ENSG00000143641 | AAAGUUU |
| ENSG00000143641 | AAUACUG |
| ENSG00000143641 | ACUGUGU |
| ENSG00000143641 | GACAACU |
| ENSG00000143641 | GACCAUG |
| ENSG00000143641 | GAGAAGA |
| ENSG00000143641 | GAGGUAG |
| ENSG00000143641 | GGCAGGG |
| ENSG00000143641 | GUGACAG |
| ENSG00000143641 | GUGUCAC |
| ENSG00000143641 | UGCAAAG |
| ENSG00000143641 | UGUGUCA |
| ENSG00000143641 | UUCAAGC |
| ENSG00000143641 | UCCAUA  |
| ENSG00000143641 | UUGCAA  |
| ENSG00000143641 | UUUCAAC |
| ENSG00000143641 | UUUGCAA |
| ENSG00000143643 | UGUAUAA |
| ENSG00000143643 | UUCAAGC |
| ENSG00000143653 | UGAAAUG |
| ENSG00000143669 | AAAAGUA |
| ENSG00000143669 | AAUCACU |
| ENSG00000143669 | GUAAACA |
| ENSG00000143702 | AAAGUGC |
| ENSG00000143702 | AACACUG |
| ENSG00000143702 | AUGGCUU |
| ENSG00000143702 | GAUAUGU |
| ENSG00000143702 | GUAACAG |
| ENSG00000143702 | GUGCAA  |
| ENSG00000143702 | UCAUGAU |
| ENSG00000143702 | UCCAGAG |
| ENSG00000143702 | UCUGGAG |
| ENSG00000143702 | UUGGCAC |
| ENSG00000143756 | CAGUUAC |
| ENSG00000143756 | GUGCAA  |
| ENSG00000143761 | AAAACUG |
| ENSG00000143761 | AAAGCUG |
| ENSG00000143761 | ACAUUAC |
| ENSG00000143761 | AGUGCUU |
| ENSG00000143761 | AUUGCAC |
| ENSG00000143761 | CUCCAGC |
| ENSG00000143761 | UACAGUU |
| ENSG00000143761 | UGCAUUA |
| ENSG00000143761 | UUCUAAU |
| ENSG00000143768 | AAGUGCA |
| ENSG00000143768 | AGUGCUU |
| ENSG00000143772 | AAAGUGC |
| ENSG00000143772 | AAGGCAC |
| ENSG00000143772 | AGUGCAA |
| ENSG00000143772 | CAAAGUG |
| ENSG00000143772 | CUUGUAU |
| ENSG00000143772 | GGGGCAG |
| ENSG00000143772 | GUAGUGU |
| ENSG00000143772 | GUCACUC |
| ENSG00000143772 | GUGCAA  |
| ENSG00000143772 | UUGUUCG |
| ENSG00000143776 | AAAACC  |
| ENSG00000143776 | AAAACUG |
| ENSG00000143776 | AAACUGU |

|                 |         |
|-----------------|---------|
| ENSG00000143776 | AACUGGU |
| ENSG00000143776 | ACUGUGU |
| ENSG00000143776 | AGCACCA |
| ENSG00000143776 | AUACAAG |
| ENSG00000143776 | AUUGCAC |
| ENSG00000143776 | CAAAACU |
| ENSG00000143776 | GAGAAAU |
| ENSG00000143776 | GAGAACU |
| ENSG00000143776 | UAAUAUC |
| ENSG00000143776 | UAUUGCU |
| ENSG00000143776 | UCCCACC |
| ENSG00000143776 | UGGCCAC |
| ENSG00000143776 | UUGGCAC |
| ENSG00000143786 | AGCAGCA |
| ENSG00000143786 | CAGGAAC |
| ENSG00000143786 | UCACAGG |
| ENSG00000143786 | UGUAUAA |
| ENSG00000143797 | AAGACAU |
| ENSG00000143797 | AAGGCGC |
| ENSG00000143797 | AAGGUGC |
| ENSG00000143797 | AAUACUG |
| ENSG00000143797 | AGUGCCU |
| ENSG00000143797 | AUUCAUU |
| ENSG00000143797 | AUUGCAC |
| ENSG00000143797 | CAGUGCA |
| ENSG00000143797 | GACCCUG |
| ENSG00000143797 | GAGAUGA |
| ENSG00000143797 | GGGUUUA |
| ENSG00000143797 | UAUUGCU |
| ENSG00000143797 | UGGGAUC |
| ENSG00000143801 | AAAACUG |
| ENSG00000143801 | CUAUACA |
| ENSG00000143815 | AAGUCAC |
| ENSG00000143815 | GAGGUAG |
| ENSG00000143815 | GAGGUAU |
| ENSG00000143842 | AAAAAUC |
| ENSG00000143842 | AAAGAGG |
| ENSG00000143842 | CCCCCAG |
| ENSG00000143842 | CCCCUGG |
| ENSG00000143842 | CUUGGAG |
| ENSG00000143842 | GAGCUAA |
| ENSG00000143842 | GAGGUAG |
| ENSG00000143845 | AGUACUG |
| ENSG00000143845 | CCCUGAG |
| ENSG00000143845 | CUUCACC |
| ENSG00000143845 | GAGCCCU |
| ENSG00000143845 | GAGGUAG |
| ENSG00000143845 | GGUUGAC |
| ENSG00000143845 | UAAUGCU |
| ENSG00000143845 | UCUCCAA |
| ENSG00000143845 | UGAAGUG |
| ENSG00000143845 | UUGGCAA |
| ENSG00000143845 | UUGGCAC |
| ENSG00000143847 | ACACACU |
| ENSG00000143847 | ACAGUAU |
| ENSG00000143847 | AGUACUG |
| ENSG00000143847 | CUCACAC |
| ENSG00000143847 | UGAGAAG |
| ENSG00000143850 | AAAGAGC |
| ENSG00000143850 | AAGGCAC |
| ENSG00000143850 | AAGUCUU |
| ENSG00000143850 | AAUACUG |
| ENSG00000143850 | AGCAAAA |
| ENSG00000143850 | AGCUGCC |

|                 |          |
|-----------------|----------|
| ENSG00000143850 | AUACAAG  |
| ENSG00000143850 | AUAUUAU  |
| ENSG00000143850 | AUGUGCC  |
| ENSG00000143850 | AUUGCAC  |
| ENSG00000143850 | CCUGCUG  |
| ENSG00000143850 | CUGCCCC  |
| ENSG00000143850 | CUGGCUC  |
| ENSG00000143850 | CUUUGGU  |
| ENSG00000143850 | GAGCUGC  |
| ENSG00000143850 | GGGGUGG  |
| ENSG00000143850 | UCACAGG  |
| ENSG00000143850 | UCACAGU  |
| ENSG00000143850 | UGAAAGG  |
| ENSG00000143850 | UGCAUUAU |
| ENSG00000143850 | UGGCCCU  |
| ENSG00000143850 | UGUAUAA  |
| ENSG00000143850 | UGUCUUU  |
| ENSG00000143851 | CUCUUCC  |
| ENSG00000143858 | GAGGUAG  |
| ENSG00000143858 | GCAGCAU  |
| ENSG00000143862 | AAAAACC  |
| ENSG00000143862 | AAAUGGU  |
| ENSG00000143862 | ACAAUAU  |
| ENSG00000143862 | ACACACC  |
| ENSG00000143862 | ACACACU  |
| ENSG00000143862 | ACUGUAG  |
| ENSG00000143862 | CAGCAGG  |
| ENSG00000143862 | CAGUUAC  |
| ENSG00000143862 | GAGAACC  |
| ENSG00000143862 | GAGAACU  |
| ENSG00000143862 | GCAGCAU  |
| ENSG00000143862 | GGGGUCC  |
| ENSG00000143862 | GUGCAAA  |
| ENSG00000143862 | UACAGUU  |
| ENSG00000143867 | AAAAGUA  |
| ENSG00000143867 | AAAGUAA  |
| ENSG00000143867 | AAUACUG  |
| ENSG00000143867 | AGCUUAU  |
| ENSG00000143867 | AUAAAGU  |
| ENSG00000143867 | CAGGCUC  |
| ENSG00000143867 | CCAGUGU  |
| ENSG00000143867 | GGGGAGC  |
| ENSG00000143870 | ACAAUAU  |
| ENSG00000143870 | AGCAGCA  |
| ENSG00000143870 | CUCCAA   |
| ENSG00000143870 | CUGGAAA  |
| ENSG00000143870 | GAGAUGA  |
| ENSG00000143870 | UAAUAUC  |
| ENSG00000143870 | UCACAUU  |
| ENSG00000143870 | UUCUUGU  |
| ENSG00000143878 | AGCUUAU  |
| ENSG00000143878 | AUGGCAC  |
| ENSG00000143878 | AUGUAAU  |
| ENSG00000143878 | UAAUAUC  |
| ENSG00000143878 | UGCAAAG  |
| ENSG00000143882 | AACACUG  |
| ENSG00000143882 | CCAUUAC  |
| ENSG00000143882 | CUUGGGC  |
| ENSG00000143882 | GAGGCUG  |
| ENSG00000143882 | GUAUUCU  |
| ENSG00000143882 | UCUCAAG  |
| ENSG00000143882 | UUCCAUA  |
| ENSG00000143882 | UUCUUGU  |
| ENSG00000143891 | GCCUGGA  |



|                 |         |
|-----------------|---------|
| ENSG00000143921 | ACUGCAG |
| ENSG00000143921 | CUGCAGC |
| ENSG00000143921 | UGUCUUU |
| ENSG00000143924 | AAAGUUU |
| ENSG00000143924 | AUGGCAC |
| ENSG00000143924 | AUUCAUU |
| ENSG00000143924 | CAGUAGU |
| ENSG00000143924 | CUUCACC |
| ENSG00000143924 | GGAAUGU |
| ENSG00000143924 | GGCUCAG |
| ENSG00000143924 | GUCAGUU |
| ENSG00000143924 | UAAGACG |
| ENSG00000143924 | UCACACA |
| ENSG00000143924 | UCACAUU |
| ENSG00000143924 | UCAUUCG |
| ENSG00000143924 | UGAGAAG |
| ENSG00000143924 | UUCUAAU |
| ENSG00000143924 | UUCUGCA |
| ENSG00000143924 | UUGAGGC |
| ENSG00000143933 | AAAGUUU |
| ENSG00000143933 | ACCAGCA |
| ENSG00000143933 | ACUUGGA |
| ENSG00000143933 | AUAAUAC |
| ENSG00000143933 | AUACAAG |
| ENSG00000143933 | AUGGAUU |
| ENSG00000143933 | CAUAUUG |
| ENSG00000143933 | CUAUACA |
| ENSG00000143933 | GAGGCAG |
| ENSG00000143933 | GGAAUGU |
| ENSG00000143933 | GGAGGAG |
| ENSG00000143933 | GGAUUUC |
| ENSG00000143933 | GUGCCAC |
| ENSG00000143933 | UAAUACA |
| ENSG00000143933 | UACAAAG |
| ENSG00000143933 | UCAACAG |
| ENSG00000143933 | UCCUCU  |
| ENSG00000143933 | UGCAUUA |
| ENSG00000143933 | UGGAUAA |
| ENSG00000143933 | UGUUGAA |
| ENSG00000143933 | UUGACAC |
| ENSG00000143933 | UUGAUCA |
| ENSG00000143933 | UUUGCAC |
| ENSG00000143952 | AGCAUUC |
| ENSG00000143952 | AUUGCAC |
| ENSG00000143952 | CAAAGCA |
| ENSG00000143952 | GGAUUUC |
| ENSG00000143952 | GGAUUUU |
| ENSG00000143952 | UGCAAAG |
| ENSG00000143952 | UGGGACA |
| ENSG00000143954 | AUGAUGA |
| ENSG00000143970 | AAGGUGC |
| ENSG00000143970 | AAGUCUU |
| ENSG00000143970 | AAGUGCU |
| ENSG00000143970 | CUCAGGG |
| ENSG00000143970 | GACAACU |
| ENSG00000143970 | GGAAUGU |
| ENSG00000143970 | GUAUUCU |
| ENSG00000143970 | GUGACAG |
| ENSG00000143970 | GUGCAA  |
| ENSG00000143970 | UCCUGAG |
| ENSG00000143970 | UCUGGAA |
| ENSG00000143971 | CUCACAC |
| ENSG00000143971 | GAGAAAU |
| ENSG00000143971 | UCUCACC |

|                 |          |
|-----------------|----------|
| ENSG00000143977 | AACAAAC  |
| ENSG00000143995 | AAAAGUA  |
| ENSG00000143995 | AAAGUAAU |
| ENSG00000143995 | AAAUUUC  |
| ENSG00000143995 | AACAGUC  |
| ENSG00000143995 | AAGACAU  |
| ENSG00000143995 | AAUGCCC  |
| ENSG00000143995 | ACAGUAAU |
| ENSG00000143995 | ACUAGAU  |
| ENSG00000143995 | ACUCAA   |
| ENSG00000143995 | AUGAUGC  |
| ENSG00000143995 | AUGCAUU  |
| ENSG00000143995 | GAUUGGU  |
| ENSG00000143995 | GCAGGAC  |
| ENSG00000143995 | GGAAUGU  |
| ENSG00000143995 | GGAGGAG  |
| ENSG00000143995 | GGGUGGU  |
| ENSG00000143995 | GGUGGUU  |
| ENSG00000143995 | GUCAACA  |
| ENSG00000143995 | GUGACAG  |
| ENSG00000143995 | UAAGACG  |
| ENSG00000143995 | UAAGACU  |
| ENSG00000143995 | UAAUACA  |
| ENSG00000143995 | UAUAAUA  |
| ENSG00000143995 | UCCAGUU  |
| ENSG00000143995 | UCCCUUG  |
| ENSG00000143995 | UCCCUUU  |
| ENSG00000143995 | UCUGGAA  |
| ENSG00000143995 | UCUGGAG  |
| ENSG00000143995 | UGGAUAA  |
| ENSG00000143995 | UGUUGAA  |
| ENSG00000143995 | UUCAAAU  |
| ENSG00000143995 | UUCAAGC  |
| ENSG00000143995 | UUGCAUA  |
| ENSG00000143995 | UUGGUCC  |
| ENSG00000143995 | UUGUUCG  |
| ENSG00000143995 | UUUGCAA  |
| ENSG00000143995 | UUUUUGC  |
| ENSG00000144021 | CUGGGGG  |
| ENSG00000144021 | UCCCUUG  |
| ENSG00000144026 | UAUAAAG  |
| ENSG00000144040 | AAAGUAAU |
| ENSG00000144040 | AAAGUGC  |
| ENSG00000144040 | AAGUGCA  |
| ENSG00000144040 | AGAUAAA  |
| ENSG00000144040 | GCCUGGA  |
| ENSG00000144040 | UAUUGCU  |
| ENSG00000144040 | UCACAUU  |
| ENSG00000144040 | UGUGCUU  |
| ENSG00000144040 | UUGGCAA  |
| ENSG00000144043 | AAGGCAC  |
| ENSG00000144043 | ACUUGGA  |
| ENSG00000144043 | AGCAAAA  |
| ENSG00000144043 | AGUGCUU  |
| ENSG00000144043 | CACUCCU  |
| ENSG00000144043 | CUUACAG  |
| ENSG00000144043 | GAGAACU  |
| ENSG00000144043 | GAGGUAG  |
| ENSG00000144043 | GAGGUAAU |
| ENSG00000144043 | GCCUGGA  |
| ENSG00000144043 | GGCAAGA  |
| ENSG00000144043 | GUCAACA  |
| ENSG00000144043 | GUGCCAC  |
| ENSG00000144043 | UUCAAGC  |

|                 |         |
|-----------------|---------|
| ENSG00000144061 | UAUAAAG |
| ENSG00000144063 | UUCAAGC |
| ENSG00000144063 | UUUCAAC |
| ENSG00000144118 | GAGGUAG |
| ENSG00000144118 | GGCUCUG |
| ENSG00000144118 | UAUAAAG |
| ENSG00000144118 | UGCCAGC |
| ENSG00000144118 | UUGGCAA |
| ENSG00000144119 | AAAAACC |
| ENSG00000144119 | UAAUGCU |
| ENSG00000144119 | UGCAAAG |
| ENSG00000144152 | GAGAAAU |
| ENSG00000144218 | AAAAACC |
| ENSG00000144218 | AACUCUA |
| ENSG00000144218 | AAGUGUG |
| ENSG00000144218 | ACAUCAC |
| ENSG00000144218 | ACUCAA  |
| ENSG00000144218 | ACUGUGU |
| ENSG00000144218 | AGUAAA  |
| ENSG00000144218 | AGUGCAA |
| ENSG00000144218 | AUACAAG |
| ENSG00000144218 | AUCCUUG |
| ENSG00000144218 | AUCCUUU |
| ENSG00000144218 | CACAAUG |
| ENSG00000144218 | CACAGUG |
| ENSG00000144218 | CCUUCAU |
| ENSG00000144218 | CUACAGU |
| ENSG00000144218 | CUUGGGC |
| ENSG00000144218 | GCAGAAG |
| ENSG00000144218 | GGCAGUG |
| ENSG00000144218 | GGCUGCG |
| ENSG00000144218 | GUAACAG |
| ENSG00000144218 | GUCUACU |
| ENSG00000144218 | GUGACUG |
| ENSG00000144218 | UACAGUU |
| ENSG00000144218 | UAUAAAG |
| ENSG00000144218 | UAUAAUA |
| ENSG00000144218 | UCCCACC |
| ENSG00000144218 | UGCCUG  |
| ENSG00000144218 | UUGGUUC |
| ENSG00000144228 | AAAAGUA |
| ENSG00000144228 | AAGUCAC |
| ENSG00000144228 | AAGUGCA |
| ENSG00000144228 | ACCUGGA |
| ENSG00000144228 | ACUGGCC |
| ENSG00000144228 | AGUGCUU |
| ENSG00000144228 | AUCCUUU |
| ENSG00000144228 | AUGGCAC |
| ENSG00000144228 | CACAGUG |
| ENSG00000144228 | CAGCAA  |
| ENSG00000144228 | CAGUCUG |
| ENSG00000144228 | CCUUCAU |
| ENSG00000144228 | CUGGACU |
| ENSG00000144228 | CUUACAG |
| ENSG00000144228 | GACCUGG |
| ENSG00000144228 | GGAAGAC |
| ENSG00000144228 | GGCAAGA |
| ENSG00000144228 | UGGCCCU |
| ENSG00000144228 | UGGUACC |
| ENSG00000144228 | UGUGCUU |
| ENSG00000144228 | UUAUGCA |
| ENSG00000144228 | UUGGCAA |
| ENSG00000144228 | UUGGUCC |
| ENSG00000144229 | GAUUGUC |

|                 |          |
|-----------------|----------|
| ENSG00000144229 | GGAUUUC  |
| ENSG00000144233 | AACGGAA  |
| ENSG00000144233 | AACUGGU  |
| ENSG00000144233 | AAGGCAC  |
| ENSG00000144233 | AGCACCA  |
| ENSG00000144233 | CUCAGGG  |
| ENSG00000144233 | CUUGGGC  |
| ENSG00000144233 | GAGGUAG  |
| ENSG00000144233 | GCUAGCA  |
| ENSG00000144233 | UAAUACA  |
| ENSG00000144233 | UUUUUGC  |
| ENSG00000144278 | AAGUUGU  |
| ENSG00000144278 | AUGGCUU  |
| ENSG00000144278 | AUGUGCC  |
| ENSG00000144278 | GUGCUUG  |
| ENSG00000144278 | UCAUUUG  |
| ENSG00000144285 | ACCACAG  |
| ENSG00000144285 | CUCAAAC  |
| ENSG00000144285 | GGAGUCC  |
| ENSG00000144285 | GGCAGUG  |
| ENSG00000144285 | GUCAGUU  |
| ENSG00000144285 | UAAUGCU  |
| ENSG00000144285 | UACAAAG  |
| ENSG00000144285 | UAUUGCU  |
| ENSG00000144285 | UGCUCAC  |
| ENSG00000144285 | UUGGCAA  |
| ENSG00000144285 | UUGGCAC  |
| ENSG00000144290 | GUCAACA  |
| ENSG00000144290 | UCAUAGA  |
| ENSG00000144320 | AACACUG  |
| ENSG00000144320 | AAGGCAC  |
| ENSG00000144320 | AUGUGCC  |
| ENSG00000144320 | CGUACCG  |
| ENSG00000144320 | GUGCCUG  |
| ENSG00000144320 | UACAGUU  |
| ENSG00000144320 | UCAUUCG  |
| ENSG00000144320 | UGGCCCU  |
| ENSG00000144320 | UUCCUAG  |
| ENSG00000144320 | UUUCAAC  |
| ENSG00000144331 | CCCUGUU  |
| ENSG00000144331 | UCAAGUA  |
| ENSG00000144331 | UCCCUGU  |
| ENSG00000144331 | UUCAAGC  |
| ENSG00000144339 | GAAACAU  |
| ENSG00000144354 | AAAGUGC  |
| ENSG00000144354 | AAGGCAC  |
| ENSG00000144355 | AAAACUG  |
| ENSG00000144355 | AAAGAGC  |
| ENSG00000144355 | AAAUUUC  |
| ENSG00000144355 | ACAUAGA  |
| ENSG00000144355 | CUCAAAC  |
| ENSG00000144355 | GUGCAAA  |
| ENSG00000144355 | UCUCAAG  |
| ENSG00000144355 | UGACAUC  |
| ENSG00000144355 | UUGACAC  |
| ENSG00000144355 | UUGAUCA  |
| ENSG00000144357 | GCAGCAU  |
| ENSG00000144357 | UGAGAAU  |
| ENSG00000144366 | ACAAUUAU |
| ENSG00000144366 | AUAAAGU  |
| ENSG00000144366 | UAUUGCU  |
| ENSG00000144369 | GCAACUU  |
| ENSG00000144381 | GGAAUGU  |
| ENSG00000144426 | AAAGUGC  |

|                 |          |
|-----------------|----------|
| ENSG00000144426 | AGAUGUG  |
| ENSG00000144445 | AGCAAAA  |
| ENSG00000144445 | GAAGGAA  |
| ENSG00000144445 | GACAACU  |
| ENSG00000144445 | GUCAGUU  |
| ENSG00000144445 | UAUCAGA  |
| ENSG00000144452 | AAUGUUG  |
| ENSG00000144452 | ACACACC  |
| ENSG00000144452 | UUCUAAU  |
| ENSG00000144455 | AAAGUGC  |
| ENSG00000144455 | AAGGCAC  |
| ENSG00000144455 | AAGUGCA  |
| ENSG00000144455 | CAAAGUG  |
| ENSG00000144455 | CUGCCCC  |
| ENSG00000144460 | AAAGUAC  |
| ENSG00000144460 | AAUUAUU  |
| ENSG00000144460 | ACAGUAC  |
| ENSG00000144460 | ACAUAGA  |
| ENSG00000144460 | CAGCAAA  |
| ENSG00000144460 | UCUCCAA  |
| ENSG00000144460 | UUGGCAC  |
| ENSG00000144468 | AGCACCA  |
| ENSG00000144476 | AUAAAGU  |
| ENSG00000144485 | AGGGAGG  |
| ENSG00000144524 | AAACUGU  |
| ENSG00000144524 | AGCAGCA  |
| ENSG00000144524 | AUAUAAC  |
| ENSG00000144524 | CCCUGAG  |
| ENSG00000144524 | CCUGUAC  |
| ENSG00000144524 | CUCUGGG  |
| ENSG00000144524 | CUGCCCC  |
| ENSG00000144524 | GAGCCCC  |
| ENSG00000144524 | GAGUCUU  |
| ENSG00000144524 | GGCAGUG  |
| ENSG00000144524 | GUAACA   |
| ENSG00000144524 | UCAAGUA  |
| ENSG00000144524 | UGAGUCU  |
| ENSG00000144524 | UGUUGAA  |
| ENSG00000144560 | AAAUUUC  |
| ENSG00000144560 | ACAAUUAU |
| ENSG00000144560 | ACCAGCA  |
| ENSG00000144560 | ACGCACU  |
| ENSG00000144560 | CAGUAGA  |
| ENSG00000144560 | CAGUAGU  |
| ENSG00000144560 | CAGUCCA  |
| ENSG00000144560 | CUACAAA  |
| ENSG00000144560 | GGAAUGU  |
| ENSG00000144560 | GUGCAAA  |
| ENSG00000144560 | UCCAGUU  |
| ENSG00000144567 | AGCAGCA  |
| ENSG00000144567 | AGGCAGG  |
| ENSG00000144567 | AGGGAGG  |
| ENSG00000144567 | AGUGCCU  |
| ENSG00000144567 | AUAAAGU  |
| ENSG00000144567 | CCCUGAG  |
| ENSG00000144567 | GAGGAUA  |
| ENSG00000144567 | GAGGCAG  |
| ENSG00000144567 | GGAGGCA  |
| ENSG00000144567 | GGCAGGG  |
| ENSG00000144567 | GUGCCUG  |
| ENSG00000144567 | UGGGACA  |
| ENSG00000144579 | AAUCCUU  |
| ENSG00000144579 | AUCCUUU  |
| ENSG00000144579 | CAGCAGA  |

|                 |          |
|-----------------|----------|
| ENSG00000144579 | CCCACCU  |
| ENSG00000144579 | CCCCCAG  |
| ENSG00000144579 | CUGCCCC  |
| ENSG00000144579 | GGCAGCG  |
| ENSG00000144579 | GGGAGCU  |
| ENSG00000144579 | GGGGCAG  |
| ENSG00000144579 | UAUAUGA  |
| ENSG00000144579 | UCCCUCU  |
| ENSG00000144579 | UUGGCAA  |
| ENSG00000144579 | UUGGCAC  |
| ENSG00000144583 | AAAAGUA  |
| ENSG00000144583 | AAAGUAC  |
| ENSG00000144583 | AAAGUGC  |
| ENSG00000144583 | UACAAAG  |
| ENSG00000144583 | UGUGCUU  |
| ENSG00000144583 | UUUCAAC  |
| ENSG00000144597 | AAAAAUC  |
| ENSG00000144597 | AAGGCAC  |
| ENSG00000144597 | AGUGGUU  |
| ENSG00000144597 | CCCUGAG  |
| ENSG00000144597 | GUCCAGA  |
| ENSG00000144597 | UAUAAAAG |
| ENSG00000144597 | UCAAGUA  |
| ENSG00000144597 | UCCCUGU  |
| ENSG00000144597 | UCCUAUA  |
| ENSG00000144619 | AAAGAAU  |
| ENSG00000144619 | AAUACUG  |
| ENSG00000144619 | AAUGCCC  |
| ENSG00000144619 | AAUGUUG  |
| ENSG00000144619 | ACAUAGA  |
| ENSG00000144619 | AGCAUUC  |
| ENSG00000144619 | AUAAUAC  |
| ENSG00000144619 | AUGCAUU  |
| ENSG00000144619 | CAAAACU  |
| ENSG00000144619 | CAGACAG  |
| ENSG00000144619 | CUUUGGU  |
| ENSG00000144619 | GUAAACA  |
| ENSG00000144619 | UACAAAG  |
| ENSG00000144619 | UCCAGUU  |
| ENSG00000144619 | UGAGGAC  |
| ENSG00000144619 | UGCAUUG  |
| ENSG00000144619 | UGUAUAA  |
| ENSG00000144619 | UUGAGGC  |
| ENSG00000144642 | AAAAAUC  |
| ENSG00000144642 | AAGGCAC  |
| ENSG00000144642 | AGCUUUAU |
| ENSG00000144642 | CCAGCAU  |
| ENSG00000144642 | GGAAGAC  |
| ENSG00000144642 | GUGACAG  |
| ENSG00000144642 | UACAGUU  |
| ENSG00000144642 | UAUUGCU  |
| ENSG00000144644 | AAUGUUG  |
| ENSG00000144644 | CUCUGGG  |
| ENSG00000144644 | CUGGGGG  |
| ENSG00000144644 | GGAAUGU  |
| ENSG00000144645 | AGCAAAA  |
| ENSG00000144645 | UACAAAG  |
| ENSG00000144645 | UCACAGU  |
| ENSG00000144645 | UUGGCAC  |
| ENSG00000144668 | AGUGCUU  |
| ENSG00000144668 | CAGUGCA  |
| ENSG00000144668 | CCCCUGG  |
| ENSG00000144668 | CCCUGAG  |
| ENSG00000144668 | GACCUGG  |

|                 |          |
|-----------------|----------|
| ENSG00000144668 | GAGAAGA  |
| ENSG00000144668 | GGAAGAC  |
| ENSG00000144668 | GUAACAG  |
| ENSG00000144668 | GUGACUG  |
| ENSG00000144668 | GUGCUUG  |
| ENSG00000144668 | UAGGUUAU |
| ENSG00000144668 | UAUUGCU  |
| ENSG00000144671 | GGCAUUG  |
| ENSG00000144671 | UGAGAAU  |
| ENSG00000144674 | ACAGUAC  |
| ENSG00000144674 | ACAGUAU  |
| ENSG00000144674 | AGCAAAA  |
| ENSG00000144674 | AGCAGCA  |
| ENSG00000144674 | CAGUAGU  |
| ENSG00000144674 | GAGGUAG  |
| ENSG00000144674 | GAGGUUAU |
| ENSG00000144674 | GGUUUAC  |
| ENSG00000144677 | AAAGUGC  |
| ENSG00000144677 | AAGGUGC  |
| ENSG00000144677 | ACCCUGU  |
| ENSG00000144677 | ACUGCAG  |
| ENSG00000144677 | AGCAGCA  |
| ENSG00000144677 | AGCAGCG  |
| ENSG00000144677 | AGCAGCU  |
| ENSG00000144677 | AUGUCUG  |
| ENSG00000144677 | CACAGUG  |
| ENSG00000144677 | CAGCUGG  |
| ENSG00000144677 | CCCUGUC  |
| ENSG00000144677 | CCUGUAC  |
| ENSG00000144677 | CUGGCUC  |
| ENSG00000144677 | GAAGGAA  |
| ENSG00000144677 | GAGUGUG  |
| ENSG00000144677 | GGAGUGU  |
| ENSG00000144677 | GGCAGCG  |
| ENSG00000144677 | GGCAGGG  |
| ENSG00000144677 | GUAACAG  |
| ENSG00000144677 | GUGAAUG  |
| ENSG00000144677 | GUGCUUG  |
| ENSG00000144677 | UAUUGCU  |
| ENSG00000144677 | UGUCUGG  |
| ENSG00000144677 | UGUGCUU  |
| ENSG00000144677 | UGUGUGG  |
| ENSG00000144677 | UUGGAGG  |
| ENSG00000144677 | UUGGCAA  |
| ENSG00000144677 | UUGGCAC  |
| ENSG00000144681 | ACAGUAU  |
| ENSG00000144681 | ACUGUUU  |
| ENSG00000144681 | CACAGUG  |
| ENSG00000144681 | CUUUGGU  |
| ENSG00000144681 | GGUUGAC  |
| ENSG00000144681 | UCACAGU  |
| ENSG00000144681 | UUGGUUC  |
| ENSG00000144711 | AACAAAC  |
| ENSG00000144711 | AACUCUA  |
| ENSG00000144711 | AAGUGCU  |
| ENSG00000144711 | AGGAUGU  |
| ENSG00000144711 | CAAAGUG  |
| ENSG00000144711 | CUGGAAA  |
| ENSG00000144711 | GCUGGUG  |
| ENSG00000144711 | UAGACUG  |
| ENSG00000144711 | UGAAAGG  |
| ENSG00000144711 | UGCAAAG  |
| ENSG00000144711 | UUAGGAU  |
| ENSG00000144711 | UUUGCAA  |

|                 |          |
|-----------------|----------|
| ENSG00000144712 | AAGGCAC  |
| ENSG00000144712 | UCCUGAG  |
| ENSG00000144724 | AAAGUAA  |
| ENSG00000144724 | ACUGUGU  |
| ENSG00000144724 | AGGCAGG  |
| ENSG00000144724 | AGUAACA  |
| ENSG00000144724 | CAAAUGC  |
| ENSG00000144724 | CAGUAGA  |
| ENSG00000144724 | CAGUAGU  |
| ENSG00000144724 | UAAGACG  |
| ENSG00000144724 | UAAGACU  |
| ENSG00000144730 | AGCACCA  |
| ENSG00000144730 | AUGUCUG  |
| ENSG00000144730 | CACUGUU  |
| ENSG00000144730 | CUGGAAA  |
| ENSG00000144730 | GGCAUUG  |
| ENSG00000144730 | UACAAAG  |
| ENSG00000144730 | UCACAAG  |
| ENSG00000144730 | UCACAUU  |
| ENSG00000144730 | UGCCAGC  |
| ENSG00000144741 | AAAGGUA  |
| ENSG00000144741 | UAUAAAAG |
| ENSG00000144741 | UCAUUUG  |
| ENSG00000144741 | UGGUACC  |
| ENSG00000144741 | UGUCUUU  |
| ENSG00000144746 | AAUUUUA  |
| ENSG00000144746 | UUUGCAA  |
| ENSG00000144747 | AAUCUCU  |
| ENSG00000144747 | UGCCUG   |
| ENSG00000144749 | AAAGUGC  |
| ENSG00000144749 | AAAUUUC  |
| ENSG00000144749 | AAGGCAC  |
| ENSG00000144749 | AAUACUG  |
| ENSG00000144749 | GAGGUAG  |
| ENSG00000144749 | GAGGUAU  |
| ENSG00000144749 | GUGCAA   |
| ENSG00000144749 | GUGCUUG  |
| ENSG00000144749 | UAUAAAAG |
| ENSG00000144749 | UUGGCAC  |
| ENSG00000144749 | UUUCAAC  |
| ENSG00000144785 | AAAAACC  |
| ENSG00000144791 | GAGGUAG  |
| ENSG00000144791 | GAGGUAU  |
| ENSG00000144791 | GCACCAU  |
| ENSG00000144791 | GUGAGGU  |
| ENSG00000144791 | GUGGCC   |
| ENSG00000144791 | UGGCCCU  |
| ENSG00000144791 | UUGUGUC  |
| ENSG00000144791 | UUUGCAA  |
| ENSG00000144802 | AAAUGGU  |
| ENSG00000144802 | AAGACAU  |
| ENSG00000144802 | ACCUGGA  |
| ENSG00000144802 | AUAAUAC  |
| ENSG00000144802 | GAGUGUG  |
| ENSG00000144802 | GGUCUAG  |
| ENSG00000144802 | UAUAAUA  |
| ENSG00000144815 | AACCUGG  |
| ENSG00000144815 | AACCUGU  |
| ENSG00000144815 | UCCUAUA  |
| ENSG00000144815 | UUCAAGC  |
| ENSG00000144815 | UUGGUUC  |
| ENSG00000144824 | UAUUGCU  |
| ENSG00000144824 | UUCUUGU  |
| ENSG00000144827 | AGCAGCU  |



|                 |          |
|-----------------|----------|
| ENSG00000144827 | CACAAUG  |
| ENSG00000144827 | CUCUUCC  |
| ENSG00000144827 | UUGUGAC  |
| ENSG00000144834 | UGCAUUAU |
| ENSG00000144840 | UGCAAAG  |
| ENSG00000144840 | UGCAUAG  |
| ENSG00000144840 | UUUGCAA  |
| ENSG00000144843 | CUGCUCA  |
| ENSG00000144843 | GAGUCUU  |
| ENSG00000144847 | AAAGAAU  |
| ENSG00000144847 | CCCUGAG  |
| ENSG00000144847 | UUGGCAC  |
| ENSG00000144852 | ACCACAG  |
| ENSG00000144852 | UCCUGAG  |
| ENSG00000144857 | AUAUAAC  |
| ENSG00000144868 | AUAAAGU  |
| ENSG00000144893 | ACCACAG  |
| ENSG00000144893 | CUGGAAA  |
| ENSG00000144893 | GUGCAAA  |
| ENSG00000144893 | GUGCUUG  |
| ENSG00000144895 | UUUGCAC  |
| ENSG00000144909 | AAAGUAA  |
| ENSG00000144909 | AACACUG  |
| ENSG00000144909 | AAUUGCU  |
| ENSG00000144909 | AGCAAAA  |
| ENSG00000144909 | AUAAUAC  |
| ENSG00000144909 | AUAUUAU  |
| ENSG00000144909 | CAGCAA   |
| ENSG00000144909 | GAUUGGU  |
| ENSG00000144909 | GUCUUGC  |
| ENSG00000144909 | UCACAGG  |
| ENSG00000144909 | UCACAGU  |
| ENSG00000144935 | AAAGAGG  |
| ENSG00000144935 | AAAUCCC  |
| ENSG00000144935 | AAUUAUU  |
| ENSG00000144959 | CAAAGCA  |
| ENSG00000144959 | CAGUGCA  |
| ENSG00000144959 | CCAGUGU  |
| ENSG00000144959 | GGCAGUG  |
| ENSG00000144959 | UUCAAGC  |
| ENSG00000145012 | AACACUG  |
| ENSG00000145012 | AACAUUC  |
| ENSG00000145012 | AAGUGUG  |
| ENSG00000145012 | ACAUUCA  |
| ENSG00000145012 | AGCAGCA  |
| ENSG00000145012 | AGCAGCG  |
| ENSG00000145012 | AGCAGCU  |
| ENSG00000145012 | AGCUGCC  |
| ENSG00000145012 | AGGUUAU  |
| ENSG00000145012 | CACUGUU  |
| ENSG00000145012 | CAGCAA   |
| ENSG00000145012 | CAGUUAC  |
| ENSG00000145012 | CCCUGAG  |
| ENSG00000145012 | CUACAAA  |
| ENSG00000145012 | CUUUGGU  |
| ENSG00000145012 | GAGCUGC  |
| ENSG00000145012 | GUAAACA  |
| ENSG00000145012 | GUGAAUG  |
| ENSG00000145012 | UCCUGU   |
| ENSG00000145016 | AAAGUGC  |
| ENSG00000145016 | AAGGCAC  |
| ENSG00000145016 | AAGUGCA  |
| ENSG00000145016 | AAGUGCU  |
| ENSG00000145016 | ACAUUCA  |

|                 |         |
|-----------------|---------|
| ENSG00000145016 | AGCAGCA |
| ENSG00000145016 | AGGCAGG |
| ENSG00000145016 | AGUGCUU |
| ENSG00000145016 | CAAAGUG |
| ENSG00000145016 | CAGCAGA |
| ENSG00000145016 | CAGUGCA |
| ENSG00000145016 | GAGGCAG |
| ENSG00000145016 | GUCAGUU |
| ENSG00000145016 | GUCUUGC |
| ENSG00000145016 | UGCAAAG |
| ENSG00000145020 | GAGGUAG |
| ENSG00000145022 | CAGCAGA |
| ENSG00000145022 | GAGGCAG |
| ENSG00000145029 | AUGCAUU |
| ENSG00000145029 | CUCCAC  |
| ENSG00000145029 | GAGAACC |
| ENSG00000145040 | GCCUGGA |
| ENSG00000145040 | GGCAAGA |
| ENSG00000145087 | AAAACUG |
| ENSG00000145087 | AAGUGCU |
| ENSG00000145087 | AAUCCUU |
| ENSG00000145087 | AAUUGCU |
| ENSG00000145087 | ACAGUAC |
| ENSG00000145087 | ACAGUAU |
| ENSG00000145087 | AGCCCUU |
| ENSG00000145087 | AUGAUGA |
| ENSG00000145087 | AUUGCAC |
| ENSG00000145087 | CACAAUG |
| ENSG00000145087 | CAGGCUC |
| ENSG00000145087 | CAGUGCA |
| ENSG00000145087 | CCCUGAG |
| ENSG00000145087 | CUCCAUI |
| ENSG00000145087 | CUGGCUC |
| ENSG00000145087 | GGCCUG  |
| ENSG00000145087 | GUCAUUG |
| ENSG00000145087 | GUUAAUG |
| ENSG00000145087 | UCCUGU  |
| ENSG00000145087 | UGCAUAU |
| ENSG00000145087 | UUCAAGC |
| ENSG00000145087 | UUGGCAA |
| ENSG00000145087 | UUGGUUC |
| ENSG00000145087 | UUUCAAC |
| ENSG00000145103 | UGAGAAU |
| ENSG00000145147 | AAAAAUC |
| ENSG00000145191 | AAUACUG |
| ENSG00000145191 | AGCAGCA |
| ENSG00000145191 | CCCUGAG |
| ENSG00000145192 | CAAGAGC |
| ENSG00000145194 | AAAAAUC |
| ENSG00000145194 | GGAGGCA |
| ENSG00000145194 | UCACAGU |
| ENSG00000145194 | UUGGCAC |
| ENSG00000145242 | AAAGUGC |
| ENSG00000145242 | AAGUGCA |
| ENSG00000145242 | CAAAGUG |
| ENSG00000145244 | AACCUUG |
| ENSG00000145244 | AAGUGCU |
| ENSG00000145244 | AGGUAGU |
| ENSG00000145244 | GCUGGUG |
| ENSG00000145246 | AAAGUUU |
| ENSG00000145246 | CCAGCAU |
| ENSG00000145246 | CCAUUAC |
| ENSG00000145246 | UGAGAAU |
| ENSG00000145284 | AAAGUAA |

|                 |         |
|-----------------|---------|
| ENSG00000145284 | AAAGUAU |
| ENSG00000145284 | AAAGUGC |
| ENSG00000145284 | AAGUGCU |
| ENSG00000145284 | AAUCACU |
| ENSG00000145284 | AUGUCUG |
| ENSG00000145284 | CCUUCAU |
| ENSG00000145284 | GCAACUU |
| ENSG00000145284 | GGAUGAG |
| ENSG00000145284 | UGUCUGG |
| ENSG00000145309 | AAAGAAU |
| ENSG00000145332 | UUGGCAA |
| ENSG00000145335 | CACAAUG |
| ENSG00000145335 | CUGGGCA |
| ENSG00000145335 | GACCCUG |
| ENSG00000145335 | UCACAAG |
| ENSG00000145335 | UGAAGCU |
| ENSG00000145335 | UGCAUAG |
| ENSG00000145349 | AAACUGU |
| ENSG00000145349 | ACUGCAG |
| ENSG00000145349 | AUGGCAC |
| ENSG00000145349 | CACUGUU |
| ENSG00000145349 | CAGCAGA |
| ENSG00000145349 | CUGUUGA |
| ENSG00000145349 | GAAACAU |
| ENSG00000145349 | GCAGGUU |
| ENSG00000145349 | GGCAGGG |
| ENSG00000145349 | GGCUCAG |
| ENSG00000145349 | UCAACAG |
| ENSG00000145349 | UCACAAG |
| ENSG00000145349 | UCACAGU |
| ENSG00000145349 | UUCAAAU |
| ENSG00000145349 | UUCUCUG |
| ENSG00000145354 | UAAGACG |
| ENSG00000145354 | UAAGACU |
| ENSG00000145354 | UGUUGAA |
| ENSG00000145358 | CUACAAA |
| ENSG00000145362 | AAAAAUC |
| ENSG00000145362 | AAGACAU |
| ENSG00000145362 | AAGUGCA |
| ENSG00000145362 | ACCACAG |
| ENSG00000145362 | CAGUGCA |
| ENSG00000145362 | CCUUCAU |
| ENSG00000145362 | CCUUCUU |
| ENSG00000145362 | CUCACAC |
| ENSG00000145362 | CUUCACC |
| ENSG00000145362 | UAAUACA |
| ENSG00000145362 | UCAUAGA |
| ENSG00000145362 | UCUCACC |
| ENSG00000145362 | UUGGUCC |
| ENSG00000145365 | CAGGUGA |
| ENSG00000145375 | AAAGAAU |
| ENSG00000145375 | AAGUGCA |
| ENSG00000145375 | AGGGUCU |
| ENSG00000145375 | UGAAAUG |
| ENSG00000145386 | AAAAACC |
| ENSG00000145390 | AAAGUGC |
| ENSG00000145390 | AACACUG |
| ENSG00000145390 | AAGUGCU |
| ENSG00000145390 | AGCAGCA |
| ENSG00000145390 | AGCAGCG |
| ENSG00000145390 | AGCAGCU |
| ENSG00000145390 | AGUGCUU |
| ENSG00000145391 | AACUCUA |
| ENSG00000145391 | AAUACUG |

|                 |          |
|-----------------|----------|
| ENSG00000145391 | AGUGCAA  |
| ENSG00000145391 | AUGCACC  |
| ENSG00000145391 | AUGGCUU  |
| ENSG00000145391 | AUUGCAC  |
| ENSG00000145391 | CACUGUU  |
| ENSG00000145391 | CAGACAG  |
| ENSG00000145391 | CUACAAA  |
| ENSG00000145391 | GAAACAU  |
| ENSG00000145391 | GAUUGUA  |
| ENSG00000145391 | GGGCCCC  |
| ENSG00000145391 | GGUUGUC  |
| ENSG00000145391 | UACAAAG  |
| ENSG00000145391 | UAUUGCU  |
| ENSG00000145391 | UCCAGAG  |
| ENSG00000145391 | UGCCUG   |
| ENSG00000145391 | UGGACUG  |
| ENSG00000145391 | UUCCUAG  |
| ENSG00000145391 | UUCUGCA  |
| ENSG00000145391 | UUGAUCA  |
| ENSG00000145391 | UUGGCAC  |
| ENSG00000145391 | UUGUGUC  |
| ENSG00000145416 | GUAGUGU  |
| ENSG00000145423 | AAGUCAC  |
| ENSG00000145423 | ACAGGUG  |
| ENSG00000145423 | ACUCAGG  |
| ENSG00000145423 | AUAUUAU  |
| ENSG00000145423 | GAAAACA  |
| ENSG00000145423 | GUUAAUG  |
| ENSG00000145423 | UACAGUU  |
| ENSG00000145439 | UAGGUAU  |
| ENSG00000145439 | UUGGCAA  |
| ENSG00000145451 | AAAAACC  |
| ENSG00000145451 | AAAGCUG  |
| ENSG00000145451 | GGCAGUG  |
| ENSG00000145476 | GGAGAGA  |
| ENSG00000145476 | GUCAGUU  |
| ENSG00000145495 | AAAAACC  |
| ENSG00000145495 | AAAGUGC  |
| ENSG00000145495 | AAUACUG  |
| ENSG00000145495 | ACUAGAU  |
| ENSG00000145495 | CAGCAGG  |
| ENSG00000145495 | UAAUACA  |
| ENSG00000145495 | UAAUAUC  |
| ENSG00000145495 | UACAAAG  |
| ENSG00000145536 | UAUAAAAG |
| ENSG00000145555 | AAAGCUG  |
| ENSG00000145555 | AAAGUAC  |
| ENSG00000145555 | AAAGUAU  |
| ENSG00000145555 | AGUGCAA  |
| ENSG00000145555 | AGUGGUU  |
| ENSG00000145555 | AUAAUAC  |
| ENSG00000145555 | CAGCAAA  |
| ENSG00000145555 | CAGCAGA  |
| ENSG00000145555 | CAGUAGA  |
| ENSG00000145555 | CAGUAGU  |
| ENSG00000145555 | CUUUGGU  |
| ENSG00000145555 | GCUACAU  |
| ENSG00000145555 | GGUAGAC  |
| ENSG00000145555 | GUUAAUG  |
| ENSG00000145555 | UAUAAUA  |
| ENSG00000145555 | UCCCUUG  |
| ENSG00000145555 | UGGGAUC  |
| ENSG00000145569 | UAAUGCU  |
| ENSG00000145623 | AAUUUUA  |

|                 |         |
|-----------------|---------|
| ENSG00000145623 | AGGUAGU |
| ENSG00000145632 | CGUACCG |
| ENSG00000145632 | UAUUGCU |
| ENSG00000145632 | UCACAGG |
| ENSG00000145675 | AAAGCUG |
| ENSG00000145675 | AAAGUGC |
| ENSG00000145675 | AAGUGCA |
| ENSG00000145675 | ACCAGCA |
| ENSG00000145675 | AGCACCA |
| ENSG00000145675 | AGCAGCG |
| ENSG00000145675 | AUAUUAU |
| ENSG00000145675 | CAAAACU |
| ENSG00000145675 | CACAGUG |
| ENSG00000145675 | CAGUAGA |
| ENSG00000145675 | CAGUAGU |
| ENSG00000145675 | CUGCCCC |
| ENSG00000145675 | CUGGGCA |
| ENSG00000145675 | CUUGGGC |
| ENSG00000145675 | GAAGGUC |
| ENSG00000145675 | GACCCUG |
| ENSG00000145675 | GACUUCC |
| ENSG00000145675 | GAGCCCU |
| ENSG00000145675 | GCACCAU |
| ENSG00000145675 | GCAGCAU |
| ENSG00000145675 | GGAGGCA |
| ENSG00000145675 | GGCAUUG |
| ENSG00000145675 | GUCAUUG |
| ENSG00000145675 | GUGCUUG |
| ENSG00000145675 | UAAUGCU |
| ENSG00000145675 | UAUCAGA |
| ENSG00000145675 | UCAUAGA |
| ENSG00000145675 | UCCCUCU |
| ENSG00000145675 | UCUCACC |
| ENSG00000145675 | UGAAAGG |
| ENSG00000145675 | UGCAGCU |
| ENSG00000145675 | UGCAUAG |
| ENSG00000145675 | UGUCUGG |
| ENSG00000145675 | UUCAAAU |
| ENSG00000145675 | UUGGCAA |
| ENSG00000145675 | UUGGCAC |
| ENSG00000145675 | UUUCAAC |
| ENSG00000145681 | ACAGUAC |
| ENSG00000145681 | ACAGUAU |
| ENSG00000145681 | CACAGUG |
| ENSG00000145685 | CAGGAAC |
| ENSG00000145685 | CUCUUCC |
| ENSG00000145685 | CUUGUGU |
| ENSG00000145685 | GAGAAGA |
| ENSG00000145685 | GCUACAU |
| ENSG00000145685 | GGCUCAG |
| ENSG00000145685 | GUAAACA |
| ENSG00000145685 | GUCCAGA |
| ENSG00000145685 | UAUUGCU |
| ENSG00000145685 | UCCAGUU |
| ENSG00000145685 | UGAGAAG |
| ENSG00000145685 | UGUAUGU |
| ENSG00000145687 | CUGACUC |
| ENSG00000145687 | GUAAACA |
| ENSG00000145687 | UACAAAG |
| ENSG00000145687 | UAUAAAG |
| ENSG00000145687 | UCCUAUA |
| ENSG00000145703 | AAGGCAC |
| ENSG00000145703 | ACAUUCA |
| ENSG00000145703 | AGUGCAA |

|                 |          |
|-----------------|----------|
| ENSG00000145703 | CAGUAGU  |
| ENSG00000145703 | GAAUUGU  |
| ENSG00000145703 | UGGGUAC  |
| ENSG00000145703 | UUCAAAU  |
| ENSG00000145703 | UUGGUCC  |
| ENSG00000145708 | AAAGUUU  |
| ENSG00000145708 | AAUACUG  |
| ENSG00000145708 | CUACAAA  |
| ENSG00000145715 | CAAGAGC  |
| ENSG00000145715 | GGCUCAG  |
| ENSG00000145715 | UCACACA  |
| ENSG00000145715 | UCCAGUU  |
| ENSG00000145721 | AAGGCAC  |
| ENSG00000145721 | AGAUAAA  |
| ENSG00000145721 | UGGCUGC  |
| ENSG00000145721 | UUCUAAU  |
| ENSG00000145723 | AUUCAUU  |
| ENSG00000145725 | AGCACCA  |
| ENSG00000145725 | GUAAACA  |
| ENSG00000145725 | UGCAGCU  |
| ENSG00000145730 | AAAAAUC  |
| ENSG00000145730 | AACAGUC  |
| ENSG00000145730 | AAGGCAC  |
| ENSG00000145730 | AGCAGCA  |
| ENSG00000145730 | AGCAGCG  |
| ENSG00000145730 | UACAGUU  |
| ENSG00000145730 | UAUUACC  |
| ENSG00000145734 | UUCAAGC  |
| ENSG00000145741 | AAAGAAU  |
| ENSG00000145741 | AAAGAGC  |
| ENSG00000145741 | AGCAGCA  |
| ENSG00000145741 | AGCAGCG  |
| ENSG00000145741 | UGCAAAG  |
| ENSG00000145743 | GAUUGUC  |
| ENSG00000145743 | GUAAACA  |
| ENSG00000145743 | UAUAAAAG |
| ENSG00000145779 | AAGUCUU  |
| ENSG00000145779 | CAGCAGG  |
| ENSG00000145779 | UUGGUUC  |
| ENSG00000145780 | AAAGUGC  |
| ENSG00000145780 | AAGACAU  |
| ENSG00000145780 | AAGUGCU  |
| ENSG00000145780 | AAUUAUU  |
| ENSG00000145780 | AGAUAAA  |
| ENSG00000145780 | AGCCCUU  |
| ENSG00000145780 | AGUGCUG  |
| ENSG00000145780 | CACAGGG  |
| ENSG00000145780 | GAGCCCU  |
| ENSG00000145780 | GCAGCAU  |
| ENSG00000145780 | GCAGGAC  |
| ENSG00000145780 | GGCAAGA  |
| ENSG00000145780 | UAAGACG  |
| ENSG00000145780 | UAAGACU  |
| ENSG00000145780 | UAUAUGA  |
| ENSG00000145780 | UAUGGUU  |
| ENSG00000145780 | UCACAGG  |
| ENSG00000145780 | UGAAAGG  |
| ENSG00000145780 | UUGGCAA  |
| ENSG00000145780 | UUGGCAC  |
| ENSG00000145794 | ACACACC  |
| ENSG00000145794 | ACACACU  |
| ENSG00000145794 | AUAAUAC  |
| ENSG00000145794 | AUACAAG  |
| ENSG00000145794 | AUAUUAU  |

|                 |          |
|-----------------|----------|
| ENSG00000145794 | AUGCACC  |
| ENSG00000145794 | CUACAAA  |
| ENSG00000145794 | CUUUGGU  |
| ENSG00000145794 | UAUAAUA  |
| ENSG00000145808 | AAAACUG  |
| ENSG00000145808 | AGUGCAA  |
| ENSG00000145808 | CAGUGCA  |
| ENSG00000145808 | CUUGUGU  |
| ENSG00000145808 | GGCAGGG  |
| ENSG00000145808 | GUGAAUG  |
| ENSG00000145808 | UACAGUU  |
| ENSG00000145808 | UAUAAAAG |
| ENSG00000145808 | UCAAGUA  |
| ENSG00000145808 | UUGGUCC  |
| ENSG00000145817 | AAAGCUG  |
| ENSG00000145817 | AAAGUAA  |
| ENSG00000145817 | AAAUCCC  |
| ENSG00000145817 | AGUGAUC  |
| ENSG00000145817 | CAGGAAC  |
| ENSG00000145817 | GCAGGAC  |
| ENSG00000145817 | GCUGGUG  |
| ENSG00000145817 | UAGUGAG  |
| ENSG00000145817 | UGUAUAA  |
| ENSG00000145819 | AAAACUG  |
| ENSG00000145819 | AAAGAAU  |
| ENSG00000145819 | AAAGCUG  |
| ENSG00000145819 | AAAGUAA  |
| ENSG00000145819 | AAAUCCC  |
| ENSG00000145819 | AAUACUG  |
| ENSG00000145819 | AAUCACU  |
| ENSG00000145819 | AAUUAAU  |
| ENSG00000145819 | ACAGUAC  |
| ENSG00000145819 | ACUGUAG  |
| ENSG00000145819 | AGUGCUU  |
| ENSG00000145819 | AUCAUAC  |
| ENSG00000145819 | CAGCAGA  |
| ENSG00000145819 | CAGCAGG  |
| ENSG00000145819 | GAAACAU  |
| ENSG00000145819 | GAGUCUU  |
| ENSG00000145819 | GGAGUCC  |
| ENSG00000145819 | GGCAGUG  |
| ENSG00000145819 | GGCUGCG  |
| ENSG00000145819 | GGGGCAG  |
| ENSG00000145819 | GGUUACC  |
| ENSG00000145819 | GUCAUUG  |
| ENSG00000145819 | UACAGUU  |
| ENSG00000145819 | UCACACA  |
| ENSG00000145819 | UCCAGUU  |
| ENSG00000145819 | UCCUGAG  |
| ENSG00000145819 | UGGCUGC  |
| ENSG00000145824 | AAAAACC  |
| ENSG00000145824 | AAAACUG  |
| ENSG00000145824 | AAAGAAU  |
| ENSG00000145824 | AAAGCUG  |
| ENSG00000145824 | AGUGCUU  |
| ENSG00000145824 | AUAAAGU  |
| ENSG00000145824 | CUGGAAA  |
| ENSG00000145824 | UAUAAAAG |
| ENSG00000145824 | UAUUACC  |
| ENSG00000145824 | UCUGGAA  |
| ENSG00000145833 | ACAAUUA  |
| ENSG00000145833 | AGCACCA  |
| ENSG00000145833 | AGUGAUC  |
| ENSG00000145833 | GUAAACA  |

|                 |         |
|-----------------|---------|
| ENSG00000145860 | ACUGUUU |
| ENSG00000145860 | UCACACA |
| ENSG00000145860 | UCAUACA |
| ENSG00000145861 | CCUGUUU |
| ENSG00000145861 | GGAUUUC |
| ENSG00000145861 | GGAUUUU |
| ENSG00000145863 | GAGGUAG |
| ENSG00000145863 | GAGGUAU |
| ENSG00000145864 | AAAUGGU |
| ENSG00000145864 | AACAUUC |
| ENSG00000145864 | AAUUGCU |
| ENSG00000145864 | ACAGUAC |
| ENSG00000145864 | ACAGUAU |
| ENSG00000145864 | ACCCUGU |
| ENSG00000145864 | AGUGCAA |
| ENSG00000145864 | AUGCAUU |
| ENSG00000145864 | AUGGCUU |
| ENSG00000145864 | GGGUGUU |
| ENSG00000145864 | GUGCAAA |
| ENSG00000145864 | GUGCUUG |
| ENSG00000145864 | UAUGGUU |
| ENSG00000145864 | UCACAUU |
| ENSG00000145864 | UGCAUUG |
| ENSG00000145864 | UGCUCAC |
| ENSG00000145864 | UGCUGAC |
| ENSG00000145864 | UGUAUGU |
| ENSG00000145864 | UCCUAG  |
| ENSG00000145864 | UUUGCAA |
| ENSG00000145864 | UUUGCAC |
| ENSG00000145868 | AAGGCAC |
| ENSG00000145901 | AGCAAAA |
| ENSG00000145901 | GGAUUUC |
| ENSG00000145901 | GGAUUUU |
| ENSG00000145901 | GGGGCAG |
| ENSG00000145901 | GUGCAAA |
| ENSG00000145907 | AGAUAAA |
| ENSG00000145920 | AAAGUAA |
| ENSG00000145920 | AAAGUAC |
| ENSG00000145920 | AAAGUAU |
| ENSG00000145920 | AUGGAUU |
| ENSG00000145920 | AUUGCAC |
| ENSG00000145920 | CCAGCAU |
| ENSG00000145920 | CCCCCAG |
| ENSG00000145920 | CCCUGUC |
| ENSG00000145920 | CUCUAGC |
| ENSG00000145920 | CUCUGGG |
| ENSG00000145920 | CUGGGCA |
| ENSG00000145920 | GAAAACA |
| ENSG00000145920 | GACCAUG |
| ENSG00000145920 | GACCUGG |
| ENSG00000145920 | GAGAAGA |
| ENSG00000145920 | GAUAUGU |
| ENSG00000145920 | GCCUGU  |
| ENSG00000145920 | GCCUGGG |
| ENSG00000145920 | GGAAGCC |
| ENSG00000145920 | GGCAGGG |
| ENSG00000145920 | GGCCUG  |
| ENSG00000145920 | GGGGCAG |
| ENSG00000145920 | GGGGUCC |
| ENSG00000145920 | GUCAUUG |
| ENSG00000145920 | GUGUCAC |
| ENSG00000145920 | UACAAAG |
| ENSG00000145920 | UCAUACA |
| ENSG00000145920 | UCCCUUU |



|                 |         |
|-----------------|---------|
| ENSG00000145920 | UGAGGAC |
| ENSG00000145920 | UGCCCUG |
| ENSG00000145920 | UGUGUCA |
| ENSG00000145934 | AAAAACC |
| ENSG00000145934 | AACAAAC |
| ENSG00000145934 | ACCCUGU |
| ENSG00000145934 | ACUCAA  |
| ENSG00000145934 | AGCAGCG |
| ENSG00000145934 | AGCAGCU |
| ENSG00000145934 | AUAUUAU |
| ENSG00000145934 | CACAAUG |
| ENSG00000145934 | GAUUGUA |
| ENSG00000145934 | GUGACUG |
| ENSG00000145934 | UACAAAG |
| ENSG00000145934 | UGUAUGU |
| ENSG00000145949 | ACUGGCU |
| ENSG00000145949 | AGCAGCA |
| ENSG00000145949 | GGAGGAG |
| ENSG00000145949 | UCCCUUG |
| ENSG00000145949 | UGAAAUG |
| ENSG00000145949 | UGCAAAG |
| ENSG00000145949 | UUCUAAU |
| ENSG00000145949 | UUUGCAA |
| ENSG00000145990 | CACAGUG |
| ENSG00000145990 | UCACAGU |
| ENSG00000146005 | AGCAAAA |
| ENSG00000146005 | AGGCAGG |
| ENSG00000146005 | CCUGCUG |
| ENSG00000146005 | CUACAAA |
| ENSG00000146005 | GAAUUGU |
| ENSG00000146005 | GCUGGUG |
| ENSG00000146005 | GGUGGUC |
| ENSG00000146005 | GGUGGUU |
| ENSG00000146005 | UGAGAAG |
| ENSG00000146005 | UGCUCAC |
| ENSG00000146005 | UGUGCUI |
| ENSG00000146006 | AACACUG |
| ENSG00000146006 | AGGUUAU |
| ENSG00000146006 | AGUGCAA |
| ENSG00000146006 | AUAUAAC |
| ENSG00000146006 | AUGGAUU |
| ENSG00000146006 | GAGAACU |
| ENSG00000146006 | GCAGAAG |
| ENSG00000146006 | GCUAGCA |
| ENSG00000146006 | GUGCAAA |
| ENSG00000146006 | GUGUGGC |
| ENSG00000146006 | UAGACUG |
| ENSG00000146006 | UGAAGUG |
| ENSG00000146021 | AAAAAUC |
| ENSG00000146021 | AAAGAAU |
| ENSG00000146021 | AAAGUAA |
| ENSG00000146021 | AAUACUG |
| ENSG00000146021 | AAUCUCA |
| ENSG00000146021 | ACAUUAC |
| ENSG00000146021 | ACCUGGA |
| ENSG00000146021 | AGAUAAA |
| ENSG00000146021 | AGUAGAC |
| ENSG00000146021 | AUUGCAC |
| ENSG00000146021 | CAAAGUG |
| ENSG00000146021 | CCAGUAC |
| ENSG00000146021 | CCAGUGU |
| ENSG00000146021 | GCAACUU |
| ENSG00000146021 | GGAGAGA |
| ENSG00000146021 | UAUUGCU |

|                 |          |
|-----------------|----------|
| ENSG00000146021 | UCACAAG  |
| ENSG00000146021 | UCACAGG  |
| ENSG00000146021 | UGAAAGG  |
| ENSG00000146021 | UGAUCCA  |
| ENSG00000146021 | UGCAUAG  |
| ENSG00000146021 | UGCAUUAU |
| ENSG00000146038 | AAUACUG  |
| ENSG00000146038 | GGAUUUU  |
| ENSG00000146047 | AAAGAGC  |
| ENSG00000146049 | GAUUGGU  |
| ENSG00000146063 | GGCAGUG  |
| ENSG00000146066 | UUCAAGC  |
| ENSG00000146072 | AAAGCUG  |
| ENSG00000146072 | AACAAAC  |
| ENSG00000146072 | ACUGGCC  |
| ENSG00000146072 | CACCACC  |
| ENSG00000146072 | CAGACAG  |
| ENSG00000146072 | CUCCAGC  |
| ENSG00000146072 | CUUUGGU  |
| ENSG00000146072 | UGCAAAG  |
| ENSG00000146083 | AAAAACC  |
| ENSG00000146083 | AAAAAUC  |
| ENSG00000146083 | AAAACUG  |
| ENSG00000146083 | AAAAGUA  |
| ENSG00000146083 | AACACUG  |
| ENSG00000146083 | AAUGCCC  |
| ENSG00000146083 | ACAAUAU  |
| ENSG00000146083 | ACAGUAC  |
| ENSG00000146083 | ACAGUAU  |
| ENSG00000146083 | ACAUCAC  |
| ENSG00000146083 | ACCACAG  |
| ENSG00000146083 | ACCUGGA  |
| ENSG00000146083 | ACUUGGA  |
| ENSG00000146083 | AGCAUUC  |
| ENSG00000146083 | AGCUGCC  |
| ENSG00000146083 | AGGAUGU  |
| ENSG00000146083 | AUAUUAU  |
| ENSG00000146083 | AUCAUAC  |
| ENSG00000146083 | AUCCCUU  |
| ENSG00000146083 | AUGUGCC  |
| ENSG00000146083 | CAGCAA   |
| ENSG00000146083 | CAGCUGG  |
| ENSG00000146083 | CAGUGCA  |
| ENSG00000146083 | CCCUGAG  |
| ENSG00000146083 | CUACAAA  |
| ENSG00000146083 | CUCAAAC  |
| ENSG00000146083 | CUGCAGC  |
| ENSG00000146083 | CUGCCCC  |
| ENSG00000146083 | CUGGGGG  |
| ENSG00000146083 | CUUUGGU  |
| ENSG00000146083 | GACCCUG  |
| ENSG00000146083 | GAGAAAU  |
| ENSG00000146083 | GAGGCAG  |
| ENSG00000146083 | GAGGUAG  |
| ENSG00000146083 | GAGGUUAU |
| ENSG00000146083 | GAGUCUU  |
| ENSG00000146083 | GCAACUU  |
| ENSG00000146083 | GCAUCCC  |
| ENSG00000146083 | GCUACAU  |
| ENSG00000146083 | GGCAGUG  |
| ENSG00000146083 | GGGUGGU  |
| ENSG00000146083 | GGUGGUU  |
| ENSG00000146083 | GUAAACA  |
| ENSG00000146083 | GUGCAAA  |

|                 |         |
|-----------------|---------|
| ENSG00000146083 | UAAGACU |
| ENSG00000146083 | UAGUGAG |
| ENSG00000146083 | UAUAAUA |
| ENSG00000146083 | UCAACAG |
| ENSG00000146083 | UCAUACA |
| ENSG00000146083 | UCAUUUG |
| ENSG00000146083 | UCUCAAG |
| ENSG00000146083 | UUCUAAU |
| ENSG00000146083 | UUGGAGG |
| ENSG00000146083 | UUUCAAC |
| ENSG00000146090 | CUCUUCC |
| ENSG00000146090 | GAGGCAG |
| ENSG00000146112 | GGGAGCU |
| ENSG00000146112 | UCCCUCU |
| ENSG00000146122 | AAGGCAC |
| ENSG00000146122 | ACCUGGA |
| ENSG00000146122 | AGGACAC |
| ENSG00000146122 | CACUGUU |
| ENSG00000146122 | CCCUGAG |
| ENSG00000146122 | CCCUGUC |
| ENSG00000146122 | CCUUCUU |
| ENSG00000146122 | GCUGGUG |
| ENSG00000146122 | GUGCCAC |
| ENSG00000146122 | UAAUAUC |
| ENSG00000146122 | UAUAAAG |
| ENSG00000146122 | UCCUGU  |
| ENSG00000146122 | UGGAGAU |
| ENSG00000146143 | AGCAAAA |
| ENSG00000146151 | AACUACU |
| ENSG00000146151 | ACACACU |
| ENSG00000146151 | AGAUAAA |
| ENSG00000146151 | AUAAAGU |
| ENSG00000146151 | CUUGGAG |
| ENSG00000146151 | UAUUGCU |
| ENSG00000146151 | UUGGCAA |
| ENSG00000146197 | AAGGCAC |
| ENSG00000146197 | ACUCAAA |
| ENSG00000146197 | AUGGCUU |
| ENSG00000146197 | AUUGCAC |
| ENSG00000146197 | CCCCCAG |
| ENSG00000146197 | CUUUGGU |
| ENSG00000146197 | GAGGUAG |
| ENSG00000146197 | GGUGGGC |
| ENSG00000146216 | AACAUUC |
| ENSG00000146216 | ACAUUCA |
| ENSG00000146216 | CACACCU |
| ENSG00000146216 | CCAGUGU |
| ENSG00000146216 | CUGCAGC |
| ENSG00000146216 | CUGGGCA |
| ENSG00000146216 | GAAGGAA |
| ENSG00000146216 | GAGCCCU |
| ENSG00000146216 | GAGUGUG |
| ENSG00000146216 | GAUUGUA |
| ENSG00000146216 | GAUUGUC |
| ENSG00000146216 | GGCAAGA |
| ENSG00000146216 | UCCCUUG |
| ENSG00000146216 | UCCCUUU |
| ENSG00000146216 | UCCUGAG |
| ENSG00000146232 | AAGUCUU |
| ENSG00000146232 | CUGCAGC |
| ENSG00000146242 | AAACUGU |
| ENSG00000146242 | UUGAGGC |
| ENSG00000146247 | AACAUUC |
| ENSG00000146247 | AGCAGCA |

|                 |          |
|-----------------|----------|
| ENSG00000146250 | AGAUGUG  |
| ENSG00000146250 | AGUGGUU  |
| ENSG00000146250 | AUCAUU   |
| ENSG00000146250 | CUCUGGG  |
| ENSG00000146250 | CUGGAAA  |
| ENSG00000146250 | UCUGGAA  |
| ENSG00000146263 | AAGUCAC  |
| ENSG00000146263 | AUAAAGU  |
| ENSG00000146267 | AAAACUG  |
| ENSG00000146267 | ACACACC  |
| ENSG00000146267 | ACACACU  |
| ENSG00000146267 | ACAGGUG  |
| ENSG00000146267 | ACAGUAC  |
| ENSG00000146267 | AGCACCA  |
| ENSG00000146267 | AGGUAGU  |
| ENSG00000146267 | CAAAACU  |
| ENSG00000146267 | CACAGUG  |
| ENSG00000146267 | CCAUUAC  |
| ENSG00000146267 | GAGGCAG  |
| ENSG00000146267 | GAGGUAG  |
| ENSG00000146267 | GAGGUAU  |
| ENSG00000146267 | GGAGAGA  |
| ENSG00000146267 | GGAGGAG  |
| ENSG00000146267 | GUGAGGU  |
| ENSG00000146267 | UCACACA  |
| ENSG00000146267 | UCCAGUU  |
| ENSG00000146267 | UGCAAAG  |
| ENSG00000146267 | UUGACAC  |
| ENSG00000146267 | UUUGCAC  |
| ENSG00000146278 | AAUCUCA  |
| ENSG00000146278 | AAUUAUU  |
| ENSG00000146278 | ACAAUUAU |
| ENSG00000146278 | AGUGCAA  |
| ENSG00000146278 | CAGUAGA  |
| ENSG00000146278 | GAUUGUA  |
| ENSG00000146278 | GAUUGUC  |
| ENSG00000146285 | AAGGCAC  |
| ENSG00000146285 | AGUGCAA  |
| ENSG00000146285 | CAGUCUG  |
| ENSG00000146285 | CUUCUCU  |
| ENSG00000146285 | GCAGCAU  |
| ENSG00000146285 | GUCUGCC  |
| ENSG00000146285 | UCAAGUA  |
| ENSG00000146285 | UGUUGAA  |
| ENSG00000146285 | UUGGCAC  |
| ENSG00000146285 | UUUUUGC  |
| ENSG00000146360 | AACACUG  |
| ENSG00000146360 | ACUGUUU  |
| ENSG00000146360 | AGCAGCU  |
| ENSG00000146360 | AUAAAGU  |
| ENSG00000146360 | CACUGUU  |
| ENSG00000146360 | CAGCAGA  |
| ENSG00000146373 | GGCAUUG  |
| ENSG00000146374 | AAAGUAU  |
| ENSG00000146374 | AAUGUUG  |
| ENSG00000146374 | AGCAGCG  |
| ENSG00000146374 | AGCAGCU  |
| ENSG00000146374 | CCUUCUU  |
| ENSG00000146374 | GCAGCAU  |
| ENSG00000146374 | GGAAUGU  |
| ENSG00000146376 | AUGGCAC  |
| ENSG00000146386 | GAGAAAU  |
| ENSG00000146386 | UAUUACC  |
| ENSG00000146411 | AAAACUG  |

|                 |          |
|-----------------|----------|
| ENSG00000146411 | AGGUAGU  |
| ENSG00000146411 | AUAU AAC |
| ENSG00000146411 | GAGGUAG  |
| ENSG00000146411 | GAGGUAU  |
| ENSG00000146411 | UGAAAGG  |
| ENSG00000146414 | AUGCACC  |
| ENSG00000146425 | AAGACAU  |
| ENSG00000146425 | AGCACCA  |
| ENSG00000146425 | UAAGACG  |
| ENSG00000146425 | UAAGACU  |
| ENSG00000146426 | AAUGCCC  |
| ENSG00000146433 | AAGGCAC  |
| ENSG00000146433 | AGCAUUC  |
| ENSG00000146433 | CAA AUGC |
| ENSG00000146433 | UCCCUUG  |
| ENSG00000146433 | UGCAUAG  |
| ENSG00000146433 | UUC AAAU |
| ENSG00000146457 | AAAGCUG  |
| ENSG00000146457 | AAGGCAC  |
| ENSG00000146457 | AAGUCUU  |
| ENSG00000146457 | AAUUUUA  |
| ENSG00000146457 | ACAAGGU  |
| ENSG00000146457 | ACAUUAC  |
| ENSG00000146457 | ACUUGGA  |
| ENSG00000146457 | GGCUCAG  |
| ENSG00000146457 | GGGGAGC  |
| ENSG00000146457 | UCCCACC  |
| ENSG00000146457 | UCCUCU   |
| ENSG00000146457 | UGACUGU  |
| ENSG00000146463 | AAAAAUC  |
| ENSG00000146463 | AAAGCUG  |
| ENSG00000146463 | AAUACUG  |
| ENSG00000146463 | ACCACAG  |
| ENSG00000146463 | AGCUGCC  |
| ENSG00000146463 | CACAAUG  |
| ENSG00000146463 | CACAGUG  |
| ENSG00000146463 | GAGAAAU  |
| ENSG00000146463 | GAGGGGC  |
| ENSG00000146463 | GCACCAU  |
| ENSG00000146463 | UGAAAUG  |
| ENSG00000146463 | UUAUGCA  |
| ENSG00000146469 | CCUUCAU  |
| ENSG00000146469 | GUAAACA  |
| ENSG00000146469 | UAUUACC  |
| ENSG00000146469 | UCACAAG  |
| ENSG00000146469 | UUGGUUC  |
| ENSG00000146477 | AAGGCAC  |
| ENSG00000146477 | ACAAGGU  |
| ENSG00000146477 | CUUGGGC  |
| ENSG00000146477 | GAGAAAU  |
| ENSG00000146477 | GAGAUGA  |
| ENSG00000146477 | GGGUCC   |
| ENSG00000146477 | GGUCUU   |
| ENSG00000146477 | GUGACAG  |
| ENSG00000146477 | GUGCAA   |
| ENSG00000146477 | UCCCUUU  |
| ENSG00000146477 | UGAGAAG  |
| ENSG00000146477 | UGGCUGC  |
| ENSG00000146535 | AACAGUC  |
| ENSG00000146535 | AGCAGCA  |
| ENSG00000146535 | AGCAGCU  |
| ENSG00000146535 | AGCAUUC  |
| ENSG00000146535 | AGUAGUU  |
| ENSG00000146535 | GAAGGAA  |

|                 |         |
|-----------------|---------|
| ENSG00000146535 | UCCUGAG |
| ENSG00000146535 | UUUUUGC |
| ENSG00000146540 | CAGCUGG |
| ENSG00000146555 | AGCACCA |
| ENSG00000146574 | UAUUGCU |
| ENSG00000146574 | UCCAGUU |
| ENSG00000146576 | AAGGCAC |
| ENSG00000146576 | ACUGUUU |
| ENSG00000146576 | CCCUGAG |
| ENSG00000146587 | UCCCUGU |
| ENSG00000146592 | AAACUGU |
| ENSG00000146592 | AACAAAC |
| ENSG00000146592 | AAGUGCU |
| ENSG00000146592 | ACAUCAC |
| ENSG00000146592 | ACUCAA  |
| ENSG00000146592 | AGCACCA |
| ENSG00000146592 | AGCAGCU |
| ENSG00000146592 | AGGACAC |
| ENSG00000146592 | AUGGAUU |
| ENSG00000146592 | CACUGUU |
| ENSG00000146592 | CAUGGAU |
| ENSG00000146592 | CUCCAC  |
| ENSG00000146592 | CUCUCC  |
| ENSG00000146592 | CUUUGGU |
| ENSG00000146592 | GAGAAAU |
| ENSG00000146592 | GAGACCU |
| ENSG00000146592 | GAGAUGA |
| ENSG00000146592 | GCAGCAU |
| ENSG00000146592 | GCUGUCU |
| ENSG00000146592 | GCUUCCU |
| ENSG00000146592 | GGAGGCA |
| ENSG00000146592 | GGAUUUC |
| ENSG00000146592 | GGCAGUG |
| ENSG00000146592 | GUGCAA  |
| ENSG00000146592 | GUGUGGC |
| ENSG00000146592 | UAAUAGU |
| ENSG00000146592 | UAUUGCU |
| ENSG00000146592 | UCCAGUU |
| ENSG00000146592 | UCCCACA |
| ENSG00000146592 | UGACCUA |
| ENSG00000146592 | UGCAUAG |
| ENSG00000146592 | UGCAUAU |
| ENSG00000146592 | UGCAUUG |
| ENSG00000146592 | UGCUGAC |
| ENSG00000146592 | UGGAGAU |
| ENSG00000146592 | UGGUACC |
| ENSG00000146592 | UGUGUGG |
| ENSG00000146592 | UUCUAAU |
| ENSG00000146592 | UUGGUCC |
| ENSG00000146592 | UUGGUUC |
| ENSG00000146592 | UUUCAAC |
| ENSG00000146648 | UUGGUCC |
| ENSG00000146670 | AGCCCUU |
| ENSG00000146674 | AGCCAGU |
| ENSG00000146674 | CACCACC |
| ENSG00000146674 | GGCAGUG |
| ENSG00000146674 | UUGGUUC |
| ENSG00000146676 | AAAAACC |
| ENSG00000146676 | AAAGCUG |
| ENSG00000146676 | AAAUUUC |
| ENSG00000146676 | AACAUUC |
| ENSG00000146676 | AAGUGCU |
| ENSG00000146676 | AAGUGUG |
| ENSG00000146676 | ACAGUAU |

|                 |          |
|-----------------|----------|
| ENSG00000146676 | ACAUCAC  |
| ENSG00000146676 | ACCCUGU  |
| ENSG00000146676 | ACUGCAU  |
| ENSG00000146676 | ACUGGCU  |
| ENSG00000146676 | AGCAGCA  |
| ENSG00000146676 | AGCUGCC  |
| ENSG00000146676 | AGCUUUAU |
| ENSG00000146676 | AGUGCUG  |
| ENSG00000146676 | AGUGCUU  |
| ENSG00000146676 | AGUGGUU  |
| ENSG00000146676 | AGUGUGC  |
| ENSG00000146676 | AUCCUUG  |
| ENSG00000146676 | AUGCCUU  |
| ENSG00000146676 | AUGGAUU  |
| ENSG00000146676 | CAAAGUG  |
| ENSG00000146676 | CAGCAA   |
| ENSG00000146676 | CAGCUGG  |
| ENSG00000146676 | CCCUGUC  |
| ENSG00000146676 | CCUUCUG  |
| ENSG00000146676 | CUAUACA  |
| ENSG00000146676 | CUCAAAC  |
| ENSG00000146676 | CUCCAUU  |
| ENSG00000146676 | CUCUGGG  |
| ENSG00000146676 | CUGCAGC  |
| ENSG00000146676 | GAAACAU  |
| ENSG00000146676 | GAAGGUC  |
| ENSG00000146676 | GACCCUG  |
| ENSG00000146676 | GAGGAUA  |
| ENSG00000146676 | GAGGUAG  |
| ENSG00000146676 | GAGGUAU  |
| ENSG00000146676 | GAUUGGU  |
| ENSG00000146676 | GAUUGUA  |
| ENSG00000146676 | GCAACGA  |
| ENSG00000146676 | GCCUGAU  |
| ENSG00000146676 | GCUGGAU  |
| ENSG00000146676 | GGAAGAC  |
| ENSG00000146676 | GGACCUG  |
| ENSG00000146676 | GGAGGAG  |
| ENSG00000146676 | GGAUUUC  |
| ENSG00000146676 | GGCUCAG  |
| ENSG00000146676 | GGCUCUG  |
| ENSG00000146676 | GGUCUAG  |
| ENSG00000146676 | GUAGUGU  |
| ENSG00000146676 | GUGAAUG  |
| ENSG00000146676 | GUGCUUG  |
| ENSG00000146676 | UAAGACG  |
| ENSG00000146676 | UAAUAUC  |
| ENSG00000146676 | UACAGUU  |
| ENSG00000146676 | UAGUGAG  |
| ENSG00000146676 | UAUAAAG  |
| ENSG00000146676 | UAUUGCU  |
| ENSG00000146676 | UCUGGAA  |
| ENSG00000146676 | UCUGGAG  |
| ENSG00000146676 | UGAAGUG  |
| ENSG00000146676 | UGAGAAG  |
| ENSG00000146676 | UGAGAAU  |
| ENSG00000146676 | UGAUCCA  |
| ENSG00000146676 | UGCAUUG  |
| ENSG00000146676 | UGUAUAA  |
| ENSG00000146676 | UGUGCUU  |
| ENSG00000146676 | UGUUGAA  |
| ENSG00000146676 | UUAGGAU  |
| ENSG00000146676 | UUCAAGC  |
| ENSG00000146676 | UUGUUCG  |

|                 |         |
|-----------------|---------|
| ENSG00000146700 | AGCACCA |
| ENSG00000146700 | GCACCAU |
| ENSG00000146700 | UCCCUCU |
| ENSG00000146700 | UUGGCAC |
| ENSG00000146701 | AUGAUGC |
| ENSG00000146729 | GGAUUUU |
| ENSG00000146731 | UAUUGCU |
| ENSG00000146776 | AAAAACC |
| ENSG00000146776 | AAAAGUA |
| ENSG00000146776 | AAGGUGC |
| ENSG00000146776 | AAGUGCA |
| ENSG00000146776 | AAGUGCU |
| ENSG00000146776 | AAUUAUU |
| ENSG00000146776 | ACAAUAU |
| ENSG00000146776 | ACCAGCA |
| ENSG00000146776 | ACUCAAA |
| ENSG00000146776 | ACUGUAG |
| ENSG00000146776 | AGGGUCU |
| ENSG00000146776 | AGUAACA |
| ENSG00000146776 | AGUGCAA |
| ENSG00000146776 | AUACAAG |
| ENSG00000146776 | AUGCAUU |
| ENSG00000146776 | AUGGCUU |
| ENSG00000146776 | CAGUAGU |
| ENSG00000146776 | CAGUGCA |
| ENSG00000146776 | CAGUUAC |
| ENSG00000146776 | CCAGCAU |
| ENSG00000146776 | CCAGUGU |
| ENSG00000146776 | CUUUGGU |
| ENSG00000146776 | GAUAUGU |
| ENSG00000146776 | GAUCAGA |
| ENSG00000146776 | GUCAGUU |
| ENSG00000146776 | UAUAAUA |
| ENSG00000146776 | UAUUACC |
| ENSG00000146776 | UCCAGAG |
| ENSG00000146776 | UCCUUU  |
| ENSG00000146776 | UGAGAAU |
| ENSG00000146776 | UGUAUAA |
| ENSG00000146776 | UUCCUAG |
| ENSG00000146776 | UUGAUCA |
| ENSG00000146802 | AAAGUGC |
| ENSG00000146802 | AAGGCAC |
| ENSG00000146802 | AAGUAGC |
| ENSG00000146802 | AAGUGCA |
| ENSG00000146802 | AUGGCUU |
| ENSG00000146802 | CAAAGUG |
| ENSG00000146802 | GGCAAGA |
| ENSG00000146802 | UGCAUAG |
| ENSG00000146809 | AGGGAGG |
| ENSG00000146826 | AAUACUG |
| ENSG00000146826 | AAUCUCA |
| ENSG00000146826 | AGUGCUU |
| ENSG00000146826 | CACCACC |
| ENSG00000146826 | CAGCAGA |
| ENSG00000146826 | CAGGCUC |
| ENSG00000146826 | GGAAGCC |
| ENSG00000146826 | GGGAGCU |
| ENSG00000146826 | GGGGUGG |
| ENSG00000146826 | GUAACA  |
| ENSG00000146826 | UGCCUG  |
| ENSG00000146828 | AAGGCAC |
| ENSG00000146828 | GAGGUAG |
| ENSG00000146828 | GAGGUAU |
| ENSG00000146830 | AAAGUGC |



|                 |         |
|-----------------|---------|
| ENSG00000146830 | AACACUG |
| ENSG00000146830 | AACAGUC |
| ENSG00000146830 | AAGUGCU |
| ENSG00000146830 | AAUACUG |
| ENSG00000146830 | ACACACC |
| ENSG00000146830 | AGCAGCA |
| ENSG00000146830 | AGGCAGG |
| ENSG00000146830 | AGUGCCU |
| ENSG00000146830 | AGUGCUG |
| ENSG00000146830 | CAGGCUC |
| ENSG00000146830 | CAGUUAC |
| ENSG00000146830 | CUCAGGG |
| ENSG00000146830 | CUGGGGG |
| ENSG00000146830 | CUUUGGU |
| ENSG00000146830 | GCAACUU |
| ENSG00000146830 | GGCAGUG |
| ENSG00000146830 | GGCUCAG |
| ENSG00000146830 | GGCUGCG |
| ENSG00000146830 | GGGAGCU |
| ENSG00000146830 | GGGCCCC |
| ENSG00000146830 | GGGGUGG |
| ENSG00000146830 | GGGUAAG |
| ENSG00000146830 | GGUGGGC |
| ENSG00000146830 | GUAACAG |
| ENSG00000146830 | UAUUGCU |
| ENSG00000146830 | UCACAGG |
| ENSG00000146830 | UCCAGUU |
| ENSG00000146830 | UGCAUUG |
| ENSG00000146830 | UGGCUGC |
| ENSG00000146830 | UGGGUGA |
| ENSG00000146830 | UUAGAGA |
| ENSG00000146834 | AACAGUC |
| ENSG00000146834 | ACAGUAC |
| ENSG00000146834 | CACAGUG |
| ENSG00000146834 | CAGCAA  |
| ENSG00000146834 | CAGUCCA |
| ENSG00000146834 | UCACAGG |
| ENSG00000146834 | UGUGCUU |
| ENSG00000146842 | AGGGUUG |
| ENSG00000146858 | AAAAGUA |
| ENSG00000146858 | CAGCAGA |
| ENSG00000146858 | UGCCUG  |
| ENSG00000146859 | GUGUGGC |
| ENSG00000146872 | AAAACUG |
| ENSG00000146872 | AAAGCUG |
| ENSG00000146872 | AACAUUC |
| ENSG00000146872 | AACUCUA |
| ENSG00000146872 | AAUUAUU |
| ENSG00000146872 | ACAGGUG |
| ENSG00000146872 | ACAGUAC |
| ENSG00000146872 | ACAUUCA |
| ENSG00000146872 | ACUGCAU |
| ENSG00000146872 | ACUGGCU |
| ENSG00000146872 | AGCUGCC |
| ENSG00000146872 | AGUGCCG |
| ENSG00000146872 | AUGGAUU |
| ENSG00000146872 | CACAGUG |
| ENSG00000146872 | CAGUCUG |
| ENSG00000146872 | CCCUGAG |
| ENSG00000146872 | CUCCAC  |
| ENSG00000146872 | CUGGACU |
| ENSG00000146872 | CUGGCUC |
| ENSG00000146872 | GAAAACA |
| ENSG00000146872 | GAGAUGA |

|                 |         |
|-----------------|---------|
| ENSG00000146872 | GAGCUGC |
| ENSG00000146872 | GCAACUU |
| ENSG00000146872 | GCUGUCU |
| ENSG00000146872 | GGAAUGU |
| ENSG00000146872 | GGACUGC |
| ENSG00000146872 | GGAGGAG |
| ENSG00000146872 | UACAAAG |
| ENSG00000146872 | UCAAGUA |
| ENSG00000146872 | UCACAGG |
| ENSG00000146872 | UGAAAUG |
| ENSG00000146872 | UGAGAAU |
| ENSG00000146872 | UGAGUCU |
| ENSG00000146872 | UGUGCUU |
| ENSG00000146872 | UUCAAGC |
| ENSG00000146872 | UUCCUCG |
| ENSG00000146904 | AGCAGCA |
| ENSG00000146904 | UACAAAG |
| ENSG00000146910 | UGACCUA |
| ENSG00000146938 | AAAAAUC |
| ENSG00000146938 | AAGGCAC |
| ENSG00000146938 | ACAUUAC |
| ENSG00000146938 | ACUGUAG |
| ENSG00000146938 | ACUGUGU |
| ENSG00000146938 | CAGGAAC |
| ENSG00000146938 | CAGGCUC |
| ENSG00000146938 | CAUAUUG |
| ENSG00000146938 | CUACAAA |
| ENSG00000146938 | CUCUUCC |
| ENSG00000146938 | CUUUGGU |
| ENSG00000146938 | GAUAUGU |
| ENSG00000146938 | GCUAGCA |
| ENSG00000146938 | GGCAGGG |
| ENSG00000146938 | UAUUGCU |
| ENSG00000146938 | UCACAAG |
| ENSG00000146938 | UCACAGU |
| ENSG00000146938 | UCAUAGA |
| ENSG00000146938 | UUCCAU  |
| ENSG00000146938 | UUUGCAC |
| ENSG00000146950 | AAGUGUG |
| ENSG00000146950 | UCACAGG |
| ENSG00000146963 | AAGUGCU |
| ENSG00000146963 | AGUGCUU |
| ENSG00000146963 | AUGUAAU |
| ENSG00000146963 | CCAGCAU |
| ENSG00000146963 | UCAUUUG |
| ENSG00000146963 | UCUCCAA |
| ENSG00000146963 | UGCUCAC |
| ENSG00000146963 | UUCAAAU |
| ENSG00000147010 | AAGGCAC |
| ENSG00000147010 | GCCUGAU |
| ENSG00000147010 | UUGGCAA |
| ENSG00000147027 | ACAUUCA |
| ENSG00000147027 | AGGACAC |
| ENSG00000147027 | CUACAAA |
| ENSG00000147027 | CUAGGCU |
| ENSG00000147027 | GCUAGCA |
| ENSG00000147027 | GUCAGUU |
| ENSG00000147027 | GUGCAA  |
| ENSG00000147027 | UACAAAG |
| ENSG00000147036 | AUACAAG |
| ENSG00000147036 | CACAGUG |
| ENSG00000147036 | CCUUCAU |
| ENSG00000147036 | CUCAGGG |
| ENSG00000147036 | GAGAACC |

|                 |          |
|-----------------|----------|
| ENSG00000147036 | GAUUGGU  |
| ENSG00000147036 | GCAGCAU  |
| ENSG00000147036 | UUCAAGC  |
| ENSG00000147036 | UUCUGCA  |
| ENSG00000147044 | AAUUAUU  |
| ENSG00000147044 | CCUGCUG  |
| ENSG00000147044 | CUCUAGC  |
| ENSG00000147044 | GAGAACU  |
| ENSG00000147044 | GUCUCUG  |
| ENSG00000147044 | UAUAAAAG |
| ENSG00000147044 | UGCUGAC  |
| ENSG00000147059 | GUCUACU  |
| ENSG00000147065 | AUAAUAC  |
| ENSG00000147065 | CCAGCAU  |
| ENSG00000147065 | GGAGGAG  |
| ENSG00000147065 | UUCUAAU  |
| ENSG00000147065 | UUGGUCC  |
| ENSG00000147099 | CAGGAAC  |
| ENSG00000147099 | CUGGAAA  |
| ENSG00000147099 | GGGUGGC  |
| ENSG00000147100 | AAGUGUG  |
| ENSG00000147100 | AAUGCCC  |
| ENSG00000147100 | AGAUGUG  |
| ENSG00000147100 | AGCACCA  |
| ENSG00000147100 | AGCUGCC  |
| ENSG00000147100 | AGUGUGC  |
| ENSG00000147100 | CUUCACC  |
| ENSG00000147100 | GGCAAGA  |
| ENSG00000147100 | GGCAGUG  |
| ENSG00000147100 | UCACAUU  |
| ENSG00000147100 | UCCAGUU  |
| ENSG00000147100 | UCUGGAG  |
| ENSG00000147100 | UGAAAGG  |
| ENSG00000147113 | GGAGGCA  |
| ENSG00000147123 | GAGCCCC  |
| ENSG00000147130 | AAAAACC  |
| ENSG00000147130 | AAAUGGU  |
| ENSG00000147130 | AACAAAC  |
| ENSG00000147130 | ACAAUUAU |
| ENSG00000147130 | AGCACCA  |
| ENSG00000147130 | AGGCAGG  |
| ENSG00000147130 | AUACAAG  |
| ENSG00000147130 | CAGCAAA  |
| ENSG00000147130 | CAGCUGG  |
| ENSG00000147130 | GAAACAU  |
| ENSG00000147130 | GACAACU  |
| ENSG00000147130 | GGCAGGG  |
| ENSG00000147130 | GGCUCAG  |
| ENSG00000147130 | UAUAAAAG |
| ENSG00000147130 | UUUUUGC  |
| ENSG00000147140 | AAAGCUG  |
| ENSG00000147140 | ACCACAG  |
| ENSG00000147140 | ACCCUGU  |
| ENSG00000147140 | AUGCACC  |
| ENSG00000147140 | CCCUGUU  |
| ENSG00000147140 | CUAGUCC  |
| ENSG00000147140 | CUCCAGC  |
| ENSG00000147140 | GAUUGUA  |
| ENSG00000147140 | GCACCAU  |
| ENSG00000147140 | UCCCUUG  |
| ENSG00000147144 | AAAGAGC  |
| ENSG00000147144 | AAAUCCC  |
| ENSG00000147144 | CCAGUGC  |
| ENSG00000147144 | CCCCCAG  |

|                 |         |
|-----------------|---------|
| ENSG00000147144 | CUCUAGC |
| ENSG00000147144 | GAAGGAA |
| ENSG00000147144 | GGCAGGG |
| ENSG00000147144 | UCACAGU |
| ENSG00000147144 | UCCAGUU |
| ENSG00000147144 | UCCCUUG |
| ENSG00000147144 | UCCCUUU |
| ENSG00000147145 | CAGUAGA |
| ENSG00000147145 | GACCUGG |
| ENSG00000147162 | AACACUG |
| ENSG00000147162 | AAUCACU |
| ENSG00000147162 | ACAUUCA |
| ENSG00000147162 | ACCAGCA |
| ENSG00000147162 | AGCAGCA |
| ENSG00000147162 | AGUGGUU |
| ENSG00000147162 | CACCAGC |
| ENSG00000147162 | CAGCAA  |
| ENSG00000147162 | CCAGGAG |
| ENSG00000147162 | CUGGAAA |
| ENSG00000147162 | GCAGCAU |
| ENSG00000147162 | GCAGGAC |
| ENSG00000147162 | GGAAGAC |
| ENSG00000147162 | GGAUUUC |
| ENSG00000147162 | GGCUCAG |
| ENSG00000147162 | GGUUUAC |
| ENSG00000147162 | UCCCUUU |
| ENSG00000147162 | UUCUGCA |
| ENSG00000147162 | UUGAGGC |
| ENSG00000147162 | UUGGCAA |
| ENSG00000147162 | UUGGCAC |
| ENSG00000147180 | GUGCAA  |
| ENSG00000147202 | AAGAACC |
| ENSG00000147202 | AAGGCAC |
| ENSG00000147202 | ACUCCAG |
| ENSG00000147202 | AGCACCA |
| ENSG00000147202 | AGCAGCU |
| ENSG00000147202 | AGGUAGU |
| ENSG00000147202 | AUGGCUU |
| ENSG00000147202 | CCUUCUG |
| ENSG00000147202 | CUCAAAC |
| ENSG00000147202 | CUGGAAA |
| ENSG00000147202 | CUUUGGU |
| ENSG00000147202 | GACCCUG |
| ENSG00000147202 | GGUUUAC |
| ENSG00000147202 | UAUCAGA |
| ENSG00000147202 | UCCAGAG |
| ENSG00000147202 | UCCUGU  |
| ENSG00000147202 | UCUGGAA |
| ENSG00000147202 | UGACCUA |
| ENSG00000147202 | UUGGCAA |
| ENSG00000147202 | UUGGCAC |
| ENSG00000147202 | UUGGUUC |
| ENSG00000147202 | UUGUGAC |
| ENSG00000147224 | AAGGCAC |
| ENSG00000147224 | CUCCCAA |
| ENSG00000147231 | UCAUUUG |
| ENSG00000147246 | AAGGCAC |
| ENSG00000147246 | AAUCUCA |
| ENSG00000147246 | ACAUCAC |
| ENSG00000147246 | CAAUUGC |
| ENSG00000147246 | CUGCAGC |
| ENSG00000147246 | UCACAUU |
| ENSG00000147246 | UGAAAUG |
| ENSG00000147246 | UCCUAG  |

|                 |          |
|-----------------|----------|
| ENSG00000147251 | ACCCUGU  |
| ENSG00000147255 | ACCCUGU  |
| ENSG00000147255 | GCCUGGA  |
| ENSG00000147255 | GCCUGGG  |
| ENSG00000147255 | GUGCCUG  |
| ENSG00000147316 | CUUCUCU  |
| ENSG00000147316 | GUGAGGU  |
| ENSG00000147324 | AAACUGU  |
| ENSG00000147324 | AAAUCCC  |
| ENSG00000147324 | AAAUUUC  |
| ENSG00000147324 | AAGUAGC  |
| ENSG00000147324 | AGAUAAA  |
| ENSG00000147324 | AGAUGUG  |
| ENSG00000147324 | AUAUUAU  |
| ENSG00000147324 | AUUGCAC  |
| ENSG00000147324 | CACAGUG  |
| ENSG00000147324 | CUUGGAG  |
| ENSG00000147324 | GAAAACA  |
| ENSG00000147324 | GAGAAGA  |
| ENSG00000147324 | GCAGAAG  |
| ENSG00000147324 | GGAGGAG  |
| ENSG00000147324 | UCAAGUA  |
| ENSG00000147324 | UCACAGU  |
| ENSG00000147324 | UGAGAAG  |
| ENSG00000147324 | UGCAUAG  |
| ENSG00000147324 | UUGGAGG  |
| ENSG00000147324 | UUGGCAC  |
| ENSG00000147364 | ACAAGGU  |
| ENSG00000147364 | UAUUACC  |
| ENSG00000147382 | CAGCUGG  |
| ENSG00000147382 | CUUCUCU  |
| ENSG00000147382 | CUUUGGU  |
| ENSG00000147394 | AUUCAUU  |
| ENSG00000147400 | CAA AUGC |
| ENSG00000147408 | CUUUGGU  |
| ENSG00000147416 | AACACUG  |
| ENSG00000147416 | AGCAGCA  |
| ENSG00000147416 | AUUGCAC  |
| ENSG00000147416 | GAAAACA  |
| ENSG00000147416 | GGAAUGU  |
| ENSG00000147419 | AAAGUGC  |
| ENSG00000147419 | AAGACAU  |
| ENSG00000147419 | AAGUGCU  |
| ENSG00000147419 | CAAAGUG  |
| ENSG00000147419 | UCCAGUU  |
| ENSG00000147419 | UUGGUUC  |
| ENSG00000147421 | AAAGGUA  |
| ENSG00000147421 | GCACCAU  |
| ENSG00000147421 | UAAUACA  |
| ENSG00000147437 | CCUUCUG  |
| ENSG00000147439 | AACAAAC  |
| ENSG00000147439 | GAGGUAG  |
| ENSG00000147439 | GGACGGA  |
| ENSG00000147443 | GGAGGAG  |
| ENSG00000147454 | UCAAGUA  |
| ENSG00000147457 | ACUGCAG  |
| ENSG00000147457 | AGUGAUC  |
| ENSG00000147457 | AUUGCAC  |
| ENSG00000147457 | CAGCUGG  |
| ENSG00000147457 | CUGCAGG  |
| ENSG00000147457 | GAUUGUA  |
| ENSG00000147457 | GAUUGUC  |
| ENSG00000147457 | GGCUCAG  |
| ENSG00000147457 | GGUGGGC  |

|                 |         |
|-----------------|---------|
| ENSG00000147457 | UAUAAAG |
| ENSG00000147457 | UGAGAAG |
| ENSG00000147457 | UGGGUGA |
| ENSG00000147457 | UGUAUAA |
| ENSG00000147457 | UGUGUGG |
| ENSG00000147459 | CAGCAGG |
| ENSG00000147459 | CUCAGGG |
| ENSG00000147459 | GUAUUCU |
| ENSG00000147465 | AGCAUUC |
| ENSG00000147471 | AGUGCAA |
| ENSG00000147471 | CUGGGCA |
| ENSG00000147471 | UCACAUU |
| ENSG00000147471 | UCCAGAG |
| ENSG00000147471 | UGCAUAG |
| ENSG00000147475 | AAAAAUC |
| ENSG00000147475 | AAAAGUA |
| ENSG00000147475 | AAUUUUA |
| ENSG00000147475 | AGCACCA |
| ENSG00000147475 | AGCAGCA |
| ENSG00000147475 | AGCAGCG |
| ENSG00000147475 | AGCAGCU |
| ENSG00000147475 | AGGGAGG |
| ENSG00000147475 | AGGUAGU |
| ENSG00000147475 | CAGCAGG |
| ENSG00000147475 | GAAACAU |
| ENSG00000147475 | GGAGGCA |
| ENSG00000147475 | UGCAAAG |
| ENSG00000147475 | UUCUGCA |
| ENSG00000147488 | AAUUAAU |
| ENSG00000147488 | ACAUUAC |
| ENSG00000147488 | AUACAAG |
| ENSG00000147488 | GUGAAUG |
| ENSG00000147488 | UACAGUU |
| ENSG00000147488 | UGCAUUG |
| ENSG00000147488 | UGUGCUU |
| ENSG00000147488 | UUCCUAG |
| ENSG00000147509 | GUGCUUG |
| ENSG00000147526 | AAGGCAC |
| ENSG00000147526 | AAGUGCA |
| ENSG00000147526 | ACUGCAU |
| ENSG00000147526 | AGCACCA |
| ENSG00000147526 | CACAGUG |
| ENSG00000147526 | CAGCAAA |
| ENSG00000147526 | CAGUAGU |
| ENSG00000147526 | GAUUGUA |
| ENSG00000147526 | GAUUGUC |
| ENSG00000147526 | GCCCUGU |
| ENSG00000147526 | GGCAAGA |
| ENSG00000147526 | GUGCAAA |
| ENSG00000147526 | GUGCUUG |
| ENSG00000147526 | UCUCCAA |
| ENSG00000147526 | UGGAUAA |
| ENSG00000147533 | AUGGCAC |
| ENSG00000147533 | CAGCAGA |
| ENSG00000147533 | GAGGUAG |
| ENSG00000147533 | GGCUCUG |
| ENSG00000147535 | AAAGUAC |
| ENSG00000147535 | GUAACA  |
| ENSG00000147548 | CCUUCAU |
| ENSG00000147548 | UAGACUG |
| ENSG00000147570 | GAGAAAU |
| ENSG00000147570 | UCACAGG |
| ENSG00000147570 | UCACAGU |
| ENSG00000147573 | CCUGCUG |

|                 |         |
|-----------------|---------|
| ENSG00000147573 | CUUUGGU |
| ENSG00000147573 | UUGGUCC |
| ENSG00000147576 | AUCCUUG |
| ENSG00000147601 | AGUGAUC |
| ENSG00000147606 | AAAGAAU |
| ENSG00000147606 | GGUUGUC |
| ENSG00000147606 | GUCAGUU |
| ENSG00000147606 | UGCAUUA |
| ENSG00000147649 | AGUGCCU |
| ENSG00000147649 | CACAGUG |
| ENSG00000147649 | GCUGUCU |
| ENSG00000147649 | GUGCCUG |
| ENSG00000147650 | AAAUCCC |
| ENSG00000147650 | ACAUUCA |
| ENSG00000147650 | AGUGCUU |
| ENSG00000147650 | GUGCAAA |
| ENSG00000147650 | UAUUGCU |
| ENSG00000147655 | AACAUUC |
| ENSG00000147655 | ACAGUAC |
| ENSG00000147655 | ACAGUAU |
| ENSG00000147655 | AGGUAGU |
| ENSG00000147655 | UAAUGCU |
| ENSG00000147655 | UGCAAAG |
| ENSG00000147655 | UUUGCAA |
| ENSG00000147676 | AAAUGGU |
| ENSG00000147676 | AUAAUAC |
| ENSG00000147676 | CAAUUGC |
| ENSG00000147676 | UACAAAG |
| ENSG00000147676 | UCACAGG |
| ENSG00000147676 | UCACAGU |
| ENSG00000147676 | UGUGUGG |
| ENSG00000147676 | UUGGCAC |
| ENSG00000147676 | UUGUUCG |
| ENSG00000147679 | UACAAAG |
| ENSG00000147689 | GACAACU |
| ENSG00000147724 | AAAAAUC |
| ENSG00000147724 | AAAGAGG |
| ENSG00000147724 | AACCUGG |
| ENSG00000147724 | AACCUGU |
| ENSG00000147724 | AAGGCAC |
| ENSG00000147724 | AGCAGCU |
| ENSG00000147724 | AGCCCUU |
| ENSG00000147724 | CAGACAG |
| ENSG00000147724 | CAGCAGG |
| ENSG00000147724 | CCUGAG  |
| ENSG00000147724 | CCUUCUG |
| ENSG00000147724 | CUUUGGU |
| ENSG00000147724 | GAGGCAG |
| ENSG00000147724 | GCACCAU |
| ENSG00000147724 | GGCAAGA |
| ENSG00000147724 | UAUUGCU |
| ENSG00000147724 | UGCAGCU |
| ENSG00000147724 | UGCAUAG |
| ENSG00000147813 | CUCACAC |
| ENSG00000147813 | UCACACA |
| ENSG00000147852 | AAUACUG |
| ENSG00000147852 | CUAUACA |
| ENSG00000147852 | GGUUACC |
| ENSG00000147852 | UUGGCAC |
| ENSG00000147854 | ACAAUAU |
| ENSG00000147854 | AGGUAGU |
| ENSG00000147854 | AGUAGUU |
| ENSG00000147854 | GAGGCAG |
| ENSG00000147854 | GGCAGUG |

|                 |         |
|-----------------|---------|
| ENSG00000147854 | UCCUGAG |
| ENSG00000147862 | AAAAGUA |
| ENSG00000147862 | AAAGAAU |
| ENSG00000147862 | AAAGUAC |
| ENSG00000147862 | AAAGUGC |
| ENSG00000147862 | AAAUCCC |
| ENSG00000147862 | AAAUGGU |
| ENSG00000147862 | AACAGUC |
| ENSG00000147862 | AACUACU |
| ENSG00000147862 | AAGGCAC |
| ENSG00000147862 | ACACACU |
| ENSG00000147862 | ACAUUAC |
| ENSG00000147862 | ACUGGAU |
| ENSG00000147862 | ACUGUGU |
| ENSG00000147862 | AGAUAAA |
| ENSG00000147862 | AGCAAAA |
| ENSG00000147862 | AGCACCA |
| ENSG00000147862 | AGCAGCU |
| ENSG00000147862 | AGCCUGC |
| ENSG00000147862 | AGCUGCC |
| ENSG00000147862 | AGGACAC |
| ENSG00000147862 | AGUAACA |
| ENSG00000147862 | AGUGCAA |
| ENSG00000147862 | AUGAGCU |
| ENSG00000147862 | AUGGAUU |
| ENSG00000147862 | CACAGUG |
| ENSG00000147862 | CAGCAA  |
| ENSG00000147862 | CAGCUGG |
| ENSG00000147862 | CAGGAAC |
| ENSG00000147862 | CAUGGAU |
| ENSG00000147862 | CCAGUAC |
| ENSG00000147862 | CCCUGAG |
| ENSG00000147862 | CCCUGUC |
| ENSG00000147862 | CCCUGUU |
| ENSG00000147862 | CUACAAA |
| ENSG00000147862 | CUACAGU |
| ENSG00000147862 | CUAUACA |
| ENSG00000147862 | CUCAGGG |
| ENSG00000147862 | CUCCAUU |
| ENSG00000147862 | CUGGCUC |
| ENSG00000147862 | CUUUGGU |
| ENSG00000147862 | GAAUUGU |
| ENSG00000147862 | GAGCUGC |
| ENSG00000147862 | GAUAUGU |
| ENSG00000147862 | GCAACUU |
| ENSG00000147862 | GCACCAU |
| ENSG00000147862 | GCAGCAU |
| ENSG00000147862 | GCUGGAU |
| ENSG00000147862 | GGAAGAC |
| ENSG00000147862 | GUCACUC |
| ENSG00000147862 | GUGAGGU |
| ENSG00000147862 | UACAAAG |
| ENSG00000147862 | UAUAAAG |
| ENSG00000147862 | UAUAUGA |
| ENSG00000147862 | UAUCAGA |
| ENSG00000147862 | UCACAGG |
| ENSG00000147862 | UCACAGU |
| ENSG00000147862 | UCCAGUU |
| ENSG00000147862 | UCCUGU  |
| ENSG00000147862 | UCGUGCA |
| ENSG00000147862 | UCUGGAG |
| ENSG00000147862 | UGAAAGG |
| ENSG00000147862 | UGAAGCU |
| ENSG00000147862 | UGACUGU |



|                 |          |
|-----------------|----------|
| ENSG00000147862 | UGAGGAC  |
| ENSG00000147862 | UGCAAAG  |
| ENSG00000147862 | UGCAUUAU |
| ENSG00000147862 | UGCCAGC  |
| ENSG00000147862 | UGGCUGC  |
| ENSG00000147862 | UGUCUGC  |
| ENSG00000147862 | UGUUGAA  |
| ENSG00000147862 | UUAGGAU  |
| ENSG00000147862 | UUCAAGC  |
| ENSG00000147862 | UUGGUCC  |
| ENSG00000147862 | UUUGCAC  |
| ENSG00000147883 | AAUUAUU  |
| ENSG00000147883 | UACAGUU  |
| ENSG00000147883 | UUGUUCG  |
| ENSG00000147894 | ACUGUAG  |
| ENSG00000147894 | CACUGUU  |
| ENSG00000147912 | AAAGUGC  |
| ENSG00000147912 | AAGGCAC  |
| ENSG00000147912 | AAGUGCA  |
| ENSG00000147912 | AAGUGCU  |
| ENSG00000147912 | AGCAGCA  |
| ENSG00000147912 | CAGCUGG  |
| ENSG00000147912 | GAGAAGA  |
| ENSG00000147912 | GGCAGUG  |
| ENSG00000147912 | UGAGAAG  |
| ENSG00000148053 | AAGUGCA  |
| ENSG00000148053 | AAUUAUU  |
| ENSG00000148053 | ACUCCAG  |
| ENSG00000148053 | AGGUUAU  |
| ENSG00000148053 | AUGGAUU  |
| ENSG00000148053 | AUGUCUG  |
| ENSG00000148053 | CAAAGCA  |
| ENSG00000148053 | CAGACAG  |
| ENSG00000148053 | CAUGGAU  |
| ENSG00000148053 | CGAGGAC  |
| ENSG00000148053 | CUUCUCU  |
| ENSG00000148053 | GAGAAGA  |
| ENSG00000148053 | GAUCGAC  |
| ENSG00000148053 | GCAACUU  |
| ENSG00000148053 | GCUGGUG  |
| ENSG00000148053 | GCUGUCU  |
| ENSG00000148053 | GGAAGCC  |
| ENSG00000148053 | GGAUUUC  |
| ENSG00000148053 | GGAUUUU  |
| ENSG00000148053 | GGGUCUU  |
| ENSG00000148053 | GUGCAA   |
| ENSG00000148053 | UGCUGAC  |
| ENSG00000148053 | UGUCUGC  |
| ENSG00000148090 | CUUUGGU  |
| ENSG00000148110 | AAAACUG  |
| ENSG00000148110 | AAGGCAC  |
| ENSG00000148110 | AAUCCUU  |
| ENSG00000148110 | AGCAAAA  |
| ENSG00000148110 | AGCACCA  |
| ENSG00000148110 | AGGCAGG  |
| ENSG00000148110 | CAGCAA   |
| ENSG00000148110 | GCACCAU  |
| ENSG00000148110 | GCAGCAU  |
| ENSG00000148110 | UACAAAG  |
| ENSG00000148110 | UCAUACA  |
| ENSG00000148120 | AAAGAAU  |
| ENSG00000148120 | GUCCAGA  |
| ENSG00000148120 | UCCCUCU  |
| ENSG00000148123 | CACAGUG  |

|                 |         |
|-----------------|---------|
| ENSG00000148123 | GCUACAU |
| ENSG00000148123 | UCACAGU |
| ENSG00000148123 | UCAUACA |
| ENSG00000148143 | AGUGCUU |
| ENSG00000148143 | CCAGUGC |
| ENSG00000148153 | UUGGCAA |
| ENSG00000148153 | UUGGCAC |
| ENSG00000148154 | AAAACUG |
| ENSG00000148154 | AAUACUG |
| ENSG00000148158 | AAGUGCU |
| ENSG00000148158 | AGCAAAA |
| ENSG00000148158 | AGCUGCC |
| ENSG00000148158 | AUUGCAC |
| ENSG00000148158 | CAGCAGG |
| ENSG00000148158 | CAGUCCA |
| ENSG00000148158 | CCAGCAU |
| ENSG00000148158 | CUUUGGU |
| ENSG00000148158 | GCAGCAU |
| ENSG00000148158 | GCUGGUG |
| ENSG00000148158 | GGAUUUU |
| ENSG00000148158 | GGCAGCG |
| ENSG00000148158 | GGCAGUG |
| ENSG00000148158 | UAGAGGA |
| ENSG00000148158 | UCACAUU |
| ENSG00000148158 | UCCAGAG |
| ENSG00000148158 | UCUCAAG |
| ENSG00000148158 | UGCCAGC |
| ENSG00000148180 | AAGGCAC |
| ENSG00000148187 | GGCUCUG |
| ENSG00000148200 | UCACAUU |
| ENSG00000148200 | UGUUGAA |
| ENSG00000148204 | CUGGCUC |
| ENSG00000148204 | GAGGUAG |
| ENSG00000148204 | GGCUCUG |
| ENSG00000148204 | GUGAGGU |
| ENSG00000148204 | UCCUGU  |
| ENSG00000148204 | UGCCAGC |
| ENSG00000148218 | CAGGAAC |
| ENSG00000148218 | CUCCCAA |
| ENSG00000148218 | CUCCCAC |
| ENSG00000148218 | CUUCUCU |
| ENSG00000148218 | CUUGGGC |
| ENSG00000148218 | CUUUGGU |
| ENSG00000148218 | UGAUCCA |
| ENSG00000148218 | UUCAAGC |
| ENSG00000148218 | UUGAUCA |
| ENSG00000148218 | UUGGUUC |
| ENSG00000148219 | UAAUGCU |
| ENSG00000148229 | AGCACCA |
| ENSG00000148248 | AAAGUUU |
| ENSG00000148248 | AAGGCAC |
| ENSG00000148248 | AAUACUG |
| ENSG00000148248 | ACAGUAC |
| ENSG00000148248 | AGGGAGG |
| ENSG00000148248 | AUAAAGU |
| ENSG00000148248 | CACAGUG |
| ENSG00000148248 | CAGGUGA |
| ENSG00000148248 | CUCAAAC |
| ENSG00000148248 | GAGGUAG |
| ENSG00000148248 | GAGGUAU |
| ENSG00000148248 | GUAAACA |
| ENSG00000148248 | GUGCCUG |
| ENSG00000148248 | UCACAGU |
| ENSG00000148248 | UCCCACC |

|                 |         |
|-----------------|---------|
| ENSG00000148248 | UCUCAAG |
| ENSG00000148248 | UGCUCAC |
| ENSG00000148248 | UUCAAAU |
| ENSG00000148248 | UUUCAAC |
| ENSG00000148297 | AAAGAGC |
| ENSG00000148331 | AGCUGCC |
| ENSG00000148331 | CUGCAGC |
| ENSG00000148331 | GGCUGCG |
| ENSG00000148331 | UGGCUGC |
| ENSG00000148337 | AAAAACC |
| ENSG00000148339 | AAAAAUC |
| ENSG00000148339 | AACUCUA |
| ENSG00000148339 | ACAUUCA |
| ENSG00000148339 | AGGACAC |
| ENSG00000148339 | CCUUCUG |
| ENSG00000148339 | CUGGAAA |
| ENSG00000148339 | GAGAUGA |
| ENSG00000148339 | GCAGGAC |
| ENSG00000148339 | GGAAGCC |
| ENSG00000148339 | GGAAUGU |
| ENSG00000148339 | GUUAGGA |
| ENSG00000148339 | UCCAGUU |
| ENSG00000148339 | UCUGGAA |
| ENSG00000148339 | UUCAAAU |
| ENSG00000148339 | UUUGCAA |
| ENSG00000148339 | UUUGCAC |
| ENSG00000148341 | UUGGCAA |
| ENSG00000148343 | ACACACU |
| ENSG00000148343 | ACAUUCA |
| ENSG00000148343 | AGUGCAA |
| ENSG00000148343 | CUGCAGG |
| ENSG00000148343 | GGCAGUG |
| ENSG00000148343 | UGUGCGU |
| ENSG00000148358 | AAAGCUG |
| ENSG00000148358 | ACUCAGG |
| ENSG00000148358 | AGCUGCC |
| ENSG00000148358 | AUGCACC |
| ENSG00000148358 | CCCUGAG |
| ENSG00000148358 | GCACCAU |
| ENSG00000148358 | GGAGUGU |
| ENSG00000148358 | GUGUCAC |
| ENSG00000148358 | GUUAGGA |
| ENSG00000148396 | AACAGUC |
| ENSG00000148396 | GGCAGUG |
| ENSG00000148396 | UCUUGAG |
| ENSG00000148396 | UUAGGAU |
| ENSG00000148400 | AACAAAC |
| ENSG00000148400 | ACAUCAC |
| ENSG00000148400 | AUAAUAC |
| ENSG00000148400 | CAGUUAC |
| ENSG00000148400 | GUAAACA |
| ENSG00000148400 | UACAGUU |
| ENSG00000148400 | UAUUGCU |
| ENSG00000148400 | UCAUGAU |
| ENSG00000148408 | AAAACUG |
| ENSG00000148426 | AACACUG |
| ENSG00000148426 | ACUCCAG |
| ENSG00000148426 | CUCCAGC |
| ENSG00000148426 | UUCAAAU |
| ENSG00000148426 | UUUCAAC |
| ENSG00000148429 | AAUACUG |
| ENSG00000148429 | ACAGUAC |
| ENSG00000148429 | ACAUUCA |
| ENSG00000148429 | AGCACCA |

|                 |         |
|-----------------|---------|
| ENSG00000148429 | GCACCAU |
| ENSG00000148429 | UCACAUU |
| ENSG00000148429 | UUGGCAC |
| ENSG00000148468 | AAGGCAC |
| ENSG00000148468 | ACUUGGA |
| ENSG00000148468 | AGCAGCU |
| ENSG00000148468 | UGCAUAG |
| ENSG00000148468 | UUGGCAC |
| ENSG00000148483 | AAUACUG |
| ENSG00000148483 | CCUUCAU |
| ENSG00000148484 | AAAGCUG |
| ENSG00000148484 | AAAGUUU |
| ENSG00000148484 | AGCUGCC |
| ENSG00000148484 | GGUUACC |
| ENSG00000148484 | UGAGAAG |
| ENSG00000148484 | UUCUGCA |
| ENSG00000148484 | UUGGCAA |
| ENSG00000148484 | UUGGCAC |
| ENSG00000148516 | AGUGCAA |
| ENSG00000148516 | CAGUAGU |
| ENSG00000148516 | CUCACAC |
| ENSG00000148516 | CUCCCAC |
| ENSG00000148516 | GUAGUGU |
| ENSG00000148516 | UCACAUU |
| ENSG00000148572 | AAGUGUG |
| ENSG00000148572 | AAUACUG |
| ENSG00000148572 | AUGCACC |
| ENSG00000148572 | GUAAACA |
| ENSG00000148572 | GUGUGGC |
| ENSG00000148572 | UCACAGG |
| ENSG00000148572 | UCCCUUG |
| ENSG00000148660 | AAAAACC |
| ENSG00000148660 | AACAUUC |
| ENSG00000148660 | ACAUUCA |
| ENSG00000148660 | ACCAGCA |
| ENSG00000148660 | ACCCUGU |
| ENSG00000148660 | ACUCAGG |
| ENSG00000148660 | ACUGUUU |
| ENSG00000148660 | AGCACCA |
| ENSG00000148660 | AGGGUCU |
| ENSG00000148660 | AUGCCUU |
| ENSG00000148660 | CACCAGC |
| ENSG00000148660 | CACUCCU |
| ENSG00000148660 | CAGCAGA |
| ENSG00000148660 | CAGCUGG |
| ENSG00000148660 | CCAGCAU |
| ENSG00000148660 | CCCACCU |
| ENSG00000148660 | CGUGCAU |
| ENSG00000148660 | GAGGCAG |
| ENSG00000148660 | GCAGCAU |
| ENSG00000148660 | GGCUCUG |
| ENSG00000148660 | GGGCGUG |
| ENSG00000148660 | GUAACAG |
| ENSG00000148660 | GUCACUC |
| ENSG00000148660 | UCCAGAG |
| ENSG00000148660 | UCCUAUA |
| ENSG00000148660 | UGAAGCU |
| ENSG00000148660 | UGCAUUG |
| ENSG00000148660 | UGCUGAC |
| ENSG00000148672 | AAAAAUC |
| ENSG00000148672 | AAAUUUC |
| ENSG00000148672 | AGCAGCA |
| ENSG00000148672 | AGUAGUU |
| ENSG00000148672 | CAGUUAC |

|                 |         |
|-----------------|---------|
| ENSG00000148672 | GCAGCAU |
| ENSG00000148672 | GGUUACC |
| ENSG00000148672 | GUAAACA |
| ENSG00000148672 | UGAGAAG |
| ENSG00000148680 | UGUGCUU |
| ENSG00000148700 | AAAUCCC |
| ENSG00000148700 | AUUCAUU |
| ENSG00000148700 | GGCUCAG |
| ENSG00000148700 | UAAUACA |
| ENSG00000148700 | UUGUGAC |
| ENSG00000148704 | AACAUUC |
| ENSG00000148704 | AAGAACC |
| ENSG00000148704 | ACAUUCA |
| ENSG00000148704 | AGCAGCU |
| ENSG00000148704 | AGGGAGG |
| ENSG00000148704 | AUUCAUU |
| ENSG00000148704 | CACCAGC |
| ENSG00000148704 | CUGCUCA |
| ENSG00000148704 | GACUUCC |
| ENSG00000148704 | GGACCUG |
| ENSG00000148704 | GGAGGCA |
| ENSG00000148704 | GUGUCAC |
| ENSG00000148704 | UAAUAUC |
| ENSG00000148704 | UCCCACA |
| ENSG00000148704 | UUGUUCG |
| ENSG00000148719 | AAGGCAC |
| ENSG00000148719 | ACUUGGA |
| ENSG00000148719 | CAGUGCA |
| ENSG00000148719 | CCCCCAG |
| ENSG00000148719 | CUGGGGG |
| ENSG00000148719 | GACCCUG |
| ENSG00000148719 | GCCCUGU |
| ENSG00000148719 | GGAUUUC |
| ENSG00000148719 | GGCAGCG |
| ENSG00000148719 | GGGGCAG |
| ENSG00000148719 | UAUUGCU |
| ENSG00000148719 | UCAUGAU |
| ENSG00000148719 | UCUCCAA |
| ENSG00000148719 | UGUCUUU |
| ENSG00000148719 | UUCUAAU |
| ENSG00000148719 | UUCUGCA |
| ENSG00000148730 | AGCUUAU |
| ENSG00000148730 | UUGGCAA |
| ENSG00000148730 | UUGGCAC |
| ENSG00000148735 | GGGAUCG |
| ENSG00000148737 | AACAGUC |
| ENSG00000148737 | CAGUCUG |
| ENSG00000148737 | CUACAAA |
| ENSG00000148737 | UACAAAG |
| ENSG00000148773 | CACACCU |
| ENSG00000148798 | AAUUUUA |
| ENSG00000148798 | AGCACCA |
| ENSG00000148798 | UGAAAUG |
| ENSG00000148798 | UGCAUUA |
| ENSG00000148798 | UUGGCAC |
| ENSG00000148826 | UACAAAG |
| ENSG00000148835 | AAACUGU |
| ENSG00000148840 | UGCAUAG |
| ENSG00000148842 | AAAAACC |
| ENSG00000148842 | AAAACUG |
| ENSG00000148842 | AGCAGCG |
| ENSG00000148842 | AGCAGCU |
| ENSG00000148842 | CAGCAGA |
| ENSG00000148842 | CUUUGGU |

|                 |         |
|-----------------|---------|
| ENSG00000148842 | GCAGCAU |
| ENSG00000148842 | UCCUGAG |
| ENSG00000148842 | UUGGCAA |
| ENSG00000148842 | UUGGCAC |
| ENSG00000148842 | UUGGUCC |
| ENSG00000148848 | AGCACCA |
| ENSG00000148848 | AUGGCUU |
| ENSG00000148848 | CUUCACC |
| ENSG00000148848 | GUGCAAA |
| ENSG00000148848 | UCAAGUA |
| ENSG00000148848 | UCCCUUU |
| ENSG00000148848 | UCUGGAA |
| ENSG00000148848 | UUCAAGC |
| ENSG00000148848 | UUUGCAA |
| ENSG00000148908 | UCCUGAG |
| ENSG00000148925 | AAUUUUA |
| ENSG00000148925 | CUUUGGU |
| ENSG00000148926 | ACAUUCA |
| ENSG00000148926 | AUUGCAC |
| ENSG00000148926 | GAGAAAU |
| ENSG00000148926 | GGCUCAG |
| ENSG00000148926 | UUCCUCG |
| ENSG00000148935 | AAGGCAC |
| ENSG00000148935 | UUGGUCC |
| ENSG00000148943 | AAAGCUG |
| ENSG00000148943 | AACUACU |
| ENSG00000148943 | AAUGCCC |
| ENSG00000148943 | AAUGUUG |
| ENSG00000148943 | ACAUUCA |
| ENSG00000148943 | ACUCAA  |
| ENSG00000148943 | ACUGUAG |
| ENSG00000148943 | ACUGUUU |
| ENSG00000148943 | AUACAAG |
| ENSG00000148943 | AUAUAA  |
| ENSG00000148943 | AUGACAC |
| ENSG00000148943 | AUGCACC |
| ENSG00000148943 | CACAGUG |
| ENSG00000148943 | CAGGAAC |
| ENSG00000148943 | CCAGUGC |
| ENSG00000148943 | CUACAAA |
| ENSG00000148943 | CUUUGGU |
| ENSG00000148943 | GAAGGAA |
| ENSG00000148943 | GAUUGUA |
| ENSG00000148943 | GAUUGUC |
| ENSG00000148943 | GCACCAU |
| ENSG00000148943 | GCAGAAG |
| ENSG00000148943 | GGAAUGU |
| ENSG00000148943 | UACAAAG |
| ENSG00000148943 | UGAAAUG |
| ENSG00000148943 | UGACAUC |
| ENSG00000148943 | UGCAGCU |
| ENSG00000148943 | UGCCUG  |
| ENSG00000148943 | UGCUGAC |
| ENSG00000148943 | UGGCUGC |
| ENSG00000148943 | UUGGUCC |
| ENSG00000148943 | UUUCAAC |
| ENSG00000148948 | CACAAUG |
| ENSG00000148948 | CAGUAGA |
| ENSG00000148948 | GAAACAU |
| ENSG00000148948 | GUCAUUG |
| ENSG00000148948 | UCAUUUG |
| ENSG00000149016 | UAUUGCU |
| ENSG00000149091 | CACACCG |
| ENSG00000149091 | CACACCU |

|                 |         |
|-----------------|---------|
| ENSG00000149091 | GGCAGUG |
| ENSG00000149091 | UGAAAUG |
| ENSG00000149115 | AAAGUGC |
| ENSG00000149115 | AAGUGCA |
| ENSG00000149115 | AUGUGCC |
| ENSG00000149115 | CAAAGUG |
| ENSG00000149115 | GUGCCUG |
| ENSG00000149115 | UACAAAG |
| ENSG00000149150 | UAUAAAG |
| ENSG00000149150 | UCCCUUG |
| ENSG00000149177 | AAAGUGC |
| ENSG00000149177 | AAGGCAC |
| ENSG00000149177 | AAGUGCA |
| ENSG00000149177 | AAUCACU |
| ENSG00000149177 | AAUCCUU |
| ENSG00000149177 | AAUGCCC |
| ENSG00000149177 | AGCAGCA |
| ENSG00000149177 | AGCCAGU |
| ENSG00000149177 | AGUGCAA |
| ENSG00000149177 | AUGCCUU |
| ENSG00000149177 | AUUGCAC |
| ENSG00000149177 | CAAAGUG |
| ENSG00000149177 | CAGUAGA |
| ENSG00000149177 | CAUAUUG |
| ENSG00000149177 | GGAAGCC |
| ENSG00000149177 | GUUAAUG |
| ENSG00000149177 | UCACAGG |
| ENSG00000149177 | UCACAGU |
| ENSG00000149177 | UUCAAAU |
| ENSG00000149182 | AACAGUC |
| ENSG00000149182 | AGCAGCA |
| ENSG00000149182 | AGCAGCU |
| ENSG00000149182 | AGCCCUU |
| ENSG00000149182 | GGCAGGG |
| ENSG00000149182 | GUCCAGA |
| ENSG00000149182 | UGGCCAC |
| ENSG00000149182 | UGGGGGA |
| ENSG00000149218 | AAGGCAC |
| ENSG00000149218 | ACACACU |
| ENSG00000149218 | AGUGCAA |
| ENSG00000149231 | CUUCUCU |
| ENSG00000149231 | UAAUACA |
| ENSG00000149231 | UCAUGAU |
| ENSG00000149256 | ACAAGGU |
| ENSG00000149256 | ACAUCAC |
| ENSG00000149256 | AGCUUAU |
| ENSG00000149256 | AUGAGCU |
| ENSG00000149256 | AUUCAUU |
| ENSG00000149256 | CAGUCCA |
| ENSG00000149256 | CCAGUGC |
| ENSG00000149256 | CUCAAAC |
| ENSG00000149256 | CUCCAGC |
| ENSG00000149256 | CUGCCCC |
| ENSG00000149256 | CUUUGGU |
| ENSG00000149256 | GAGAAAU |
| ENSG00000149256 | GCUGUCU |
| ENSG00000149256 | GGCAUUG |
| ENSG00000149256 | GUCAACA |
| ENSG00000149256 | UAUCAGA |
| ENSG00000149256 | UCACAGG |
| ENSG00000149256 | UCAUUUG |
| ENSG00000149256 | UCCCUUG |
| ENSG00000149256 | UCUAGAG |
| ENSG00000149256 | UCUCAAG |

|                 |         |
|-----------------|---------|
| ENSG00000149256 | UGAGAAG |
| ENSG00000149256 | UGAGAAU |
| ENSG00000149256 | UGAGUCU |
| ENSG00000149256 | UGCAAAG |
| ENSG00000149256 | UGGAGAU |
| ENSG00000149256 | UGUCUUU |
| ENSG00000149256 | UUAUGCA |
| ENSG00000149256 | UUGGCAC |
| ENSG00000149256 | UUUUUGC |
| ENSG00000149257 | AGCACCA |
| ENSG00000149260 | AAUCUCA |
| ENSG00000149260 | CAGACAG |
| ENSG00000149260 | CAGCAGG |
| ENSG00000149260 | CCAGGAG |
| ENSG00000149260 | GCCCUUA |
| ENSG00000149260 | UCACACA |
| ENSG00000149260 | UUGGUCC |
| ENSG00000149262 | UCUCAAG |
| ENSG00000149269 | CACAAUG |
| ENSG00000149269 | GAGGCUG |
| ENSG00000149269 | GAGGUAG |
| ENSG00000149269 | GCUACAU |
| ENSG00000149269 | UCUUGAG |
| ENSG00000149269 | UUGGCAC |
| ENSG00000149289 | AAAGGUA |
| ENSG00000149289 | AAGGUGC |
| ENSG00000149289 | ACAGUAC |
| ENSG00000149289 | ACUAGAU |
| ENSG00000149289 | AGUGCAA |
| ENSG00000149289 | AUCCCUU |
| ENSG00000149289 | CACAGUG |
| ENSG00000149289 | CAGUGCA |
| ENSG00000149289 | CCAGUAC |
| ENSG00000149289 | CUACAAA |
| ENSG00000149289 | CUAUACA |
| ENSG00000149289 | GAGCUGC |
| ENSG00000149289 | GCACCAU |
| ENSG00000149289 | GGCAAGA |
| ENSG00000149289 | GUGCUUG |
| ENSG00000149289 | GUGUCAC |
| ENSG00000149289 | UACAAAG |
| ENSG00000149289 | UCCCUCU |
| ENSG00000149289 | UCCUGAG |
| ENSG00000149289 | UCCUUGC |
| ENSG00000149289 | UGAGAAG |
| ENSG00000149289 | UGCAUAG |
| ENSG00000149289 | UGCAUAU |
| ENSG00000149289 | UGCUGAC |
| ENSG00000149289 | UUAGGAU |
| ENSG00000149289 | UUGGCAC |
| ENSG00000149294 | AAAAAUC |
| ENSG00000149294 | AAAGUAA |
| ENSG00000149294 | AAAGUAC |
| ENSG00000149294 | AAAUUUC |
| ENSG00000149294 | AACACUG |
| ENSG00000149294 | AAUACUG |
| ENSG00000149294 | ACUCAGC |
| ENSG00000149294 | ACUCAGG |
| ENSG00000149294 | ACUGCAU |
| ENSG00000149294 | AGGAGCU |
| ENSG00000149294 | AGUACUG |
| ENSG00000149294 | AUACAAG |
| ENSG00000149294 | AUGACAC |
| ENSG00000149294 | CACAGUG |



|                 |          |
|-----------------|----------|
| ENSG00000149294 | CAGUGCA  |
| ENSG00000149294 | CAGUUAC  |
| ENSG00000149294 | CCAGGAG  |
| ENSG00000149294 | CUCCAUU  |
| ENSG00000149294 | CUCUUCC  |
| ENSG00000149294 | GCAGAAG  |
| ENSG00000149294 | GGCAUUG  |
| ENSG00000149294 | GUUAAUG  |
| ENSG00000149294 | UACAAAG  |
| ENSG00000149294 | UCACACA  |
| ENSG00000149294 | UCACAGG  |
| ENSG00000149294 | UCCGCUC  |
| ENSG00000149294 | UCCUGAG  |
| ENSG00000149294 | UGAAAUG  |
| ENSG00000149294 | UGAGAAU  |
| ENSG00000149294 | UGCAAAG  |
| ENSG00000149294 | UGCAUAG  |
| ENSG00000149294 | UGCAUUA  |
| ENSG00000149294 | UGUUGAA  |
| ENSG00000149294 | UUGGCAA  |
| ENSG00000149294 | UUGGCAC  |
| ENSG00000149295 | AACACUG  |
| ENSG00000149295 | ACUGCAG  |
| ENSG00000149295 | CUGGGGG  |
| ENSG00000149295 | CUUUGGU  |
| ENSG00000149295 | GAGCUGC  |
| ENSG00000149295 | GGCAGGG  |
| ENSG00000149308 | AAGGCAC  |
| ENSG00000149308 | AAGUGCA  |
| ENSG00000149308 | AUGGAUU  |
| ENSG00000149308 | AUGGCUU  |
| ENSG00000149308 | GCAGGUU  |
| ENSG00000149308 | GGCUCAG  |
| ENSG00000149308 | UACAGUU  |
| ENSG00000149308 | UGCAUUG  |
| ENSG00000149311 | UCUGGAG  |
| ENSG00000149313 | AAGACAU  |
| ENSG00000149313 | AUAUUUAU |
| ENSG00000149313 | AUGAUGA  |
| ENSG00000149313 | AUGAUGC  |
| ENSG00000149328 | CCCUGAG  |
| ENSG00000149357 | GAGGCUG  |
| ENSG00000149380 | CUUCUCU  |
| ENSG00000149380 | UCCUCU   |
| ENSG00000149397 | GGUUACC  |
| ENSG00000149428 | AAAGUAC  |
| ENSG00000149428 | ACAUUCA  |
| ENSG00000149428 | ACCACAG  |
| ENSG00000149428 | ACUCAA   |
| ENSG00000149428 | AGUGAUC  |
| ENSG00000149428 | CACAGUG  |
| ENSG00000149428 | CAGUAGA  |
| ENSG00000149428 | GAGAAGA  |
| ENSG00000149428 | GGCUCUG  |
| ENSG00000149428 | UCACAGU  |
| ENSG00000149428 | UCUCAAG  |
| ENSG00000149474 | GGAGUCC  |
| ENSG00000149480 | AAAAACC  |
| ENSG00000149480 | AAACUGU  |
| ENSG00000149480 | CAGUGCA  |
| ENSG00000149480 | GAAAACA  |
| ENSG00000149480 | GGCAGUG  |
| ENSG00000149480 | UGCCAGC  |
| ENSG00000149485 | AACAUUC  |

|                 |         |
|-----------------|---------|
| ENSG00000149485 | AGUGGUU |
| ENSG00000149485 | CACAGUG |
| ENSG00000149499 | CAGCAGG |
| ENSG00000149499 | GGAAUGU |
| ENSG00000149499 | GGCUCAG |
| ENSG00000149499 | UAUUGCU |
| ENSG00000149503 | CAGCAGG |
| ENSG00000149527 | UCCUGAG |
| ENSG00000149534 | AAAGUUU |
| ENSG00000149541 | GAGGUAG |
| ENSG00000149547 | AAAAAUC |
| ENSG00000149547 | AACCUGG |
| ENSG00000149547 | AGGCAGG |
| ENSG00000149547 | AUGGCAC |
| ENSG00000149547 | CAGUCCA |
| ENSG00000149547 | GGCAGUG |
| ENSG00000149547 | UACAAAG |
| ENSG00000149547 | UUUGCAA |
| ENSG00000149547 | UUUGCAC |
| ENSG00000149554 | AGCAGCG |
| ENSG00000149554 | AGCAGCU |
| ENSG00000149554 | CUCUAGC |
| ENSG00000149557 | UAAGACU |
| ENSG00000149575 | AAAUGGU |
| ENSG00000149575 | AACAUUC |
| ENSG00000149575 | AAGGCAC |
| ENSG00000149575 | ACUCAA  |
| ENSG00000149575 | AGCCAGU |
| ENSG00000149575 | AGGCAGG |
| ENSG00000149575 | AUAAUAC |
| ENSG00000149575 | AUAUAAC |
| ENSG00000149575 | AUGCACC |
| ENSG00000149575 | AUGGCUU |
| ENSG00000149575 | CAGCAA  |
| ENSG00000149575 | CAGCAGA |
| ENSG00000149575 | CAGCUGG |
| ENSG00000149575 | CAGUCCA |
| ENSG00000149575 | CCUGAG  |
| ENSG00000149575 | CUUUGGU |
| ENSG00000149575 | GAGAUGA |
| ENSG00000149575 | GCCCUUA |
| ENSG00000149575 | GGAAGAC |
| ENSG00000149575 | GGACCUG |
| ENSG00000149575 | GGCCUG  |
| ENSG00000149575 | GGGGUCC |
| ENSG00000149575 | GGGGUGC |
| ENSG00000149575 | GUCACUC |
| ENSG00000149575 | GUGCUUG |
| ENSG00000149575 | GUGGCC  |
| ENSG00000149575 | UAAGACG |
| ENSG00000149575 | UAAGACU |
| ENSG00000149575 | UAUAAUA |
| ENSG00000149575 | UGGCCU  |
| ENSG00000149575 | UUGGUCC |
| ENSG00000149575 | UUGUUCG |
| ENSG00000149577 | AACACUG |
| ENSG00000149577 | AGCACCA |
| ENSG00000149577 | AGCAGCA |
| ENSG00000149577 | AUGGCAC |
| ENSG00000149577 | CCUGCUG |
| ENSG00000149577 | GGUUGUC |
| ENSG00000149577 | GUAAACA |
| ENSG00000149577 | UGAGAAG |
| ENSG00000149582 | AAGUGCU |

|                 |         |
|-----------------|---------|
| ENSG00000149582 | AGCAAAA |
| ENSG00000149582 | AGUAACA |
| ENSG00000149582 | CAGCAAA |
| ENSG00000149582 | GCAGCAU |
| ENSG00000149582 | GUGCAAA |
| ENSG00000149582 | GUGCUUG |
| ENSG00000149582 | UCACAGU |
| ENSG00000149582 | UGCAUAG |
| ENSG00000149591 | AGCUGCC |
| ENSG00000149591 | AGGCAGG |
| ENSG00000149596 | UAUUGCU |
| ENSG00000149596 | UCCCACC |
| ENSG00000149596 | UGGCCAC |
| ENSG00000149599 | AAGGCAC |
| ENSG00000149599 | CAGCAGG |
| ENSG00000149600 | AUGGCAC |
| ENSG00000149636 | AAAGAAU |
| ENSG00000149636 | UUCAAAU |
| ENSG00000149639 | AAAAACC |
| ENSG00000149639 | AUGACAC |
| ENSG00000149639 | CUACAAA |
| ENSG00000149639 | GCAGGAC |
| ENSG00000149639 | GCUGGUG |
| ENSG00000149639 | UACAGUU |
| ENSG00000149657 | AAGGUGC |
| ENSG00000149657 | AAGUGCA |
| ENSG00000149657 | AGCACCA |
| ENSG00000149657 | AGUGGUU |
| ENSG00000149657 | CUACAAA |
| ENSG00000149657 | GUAACA  |
| ENSG00000149658 | AAAGCUG |
| ENSG00000149658 | ACUCCAG |
| ENSG00000149658 | AGUAACA |
| ENSG00000149658 | AUACAAG |
| ENSG00000149658 | CAGCAAA |
| ENSG00000149658 | CUACAGU |
| ENSG00000149658 | CUUGUAU |
| ENSG00000149658 | GUAACAG |
| ENSG00000149658 | UAGAGGA |
| ENSG00000149679 | ACCACAG |
| ENSG00000149679 | CAGCAGA |
| ENSG00000149679 | GGCAGCG |
| ENSG00000149679 | GGUUUAC |
| ENSG00000149679 | UAUUGCU |
| ENSG00000149679 | UCACAGU |
| ENSG00000149679 | UGCAAAG |
| ENSG00000149679 | UUGGUUC |
| ENSG00000149761 | AUAAAGU |
| ENSG00000149792 | AAAAACC |
| ENSG00000149792 | AGCUUAU |
| ENSG00000149792 | UAAUAGU |
| ENSG00000149792 | UGCAUUG |
| ENSG00000149792 | UGUAUAA |
| ENSG00000149798 | ACCAGCA |
| ENSG00000149798 | AGCAGCA |
| ENSG00000149798 | AUUGCAC |
| ENSG00000149798 | UAUUGCU |
| ENSG00000149922 | GUGCCUG |
| ENSG00000149923 | CACAGUG |
| ENSG00000149925 | GGAGUGU |
| ENSG00000149926 | AGCACCA |
| ENSG00000149926 | GGAAGCC |
| ENSG00000149927 | ACACACU |
| ENSG00000149927 | GGGGCAG |

|                 |          |
|-----------------|----------|
| ENSG00000149927 | GUAAACA  |
| ENSG00000149927 | UGCAUAG  |
| ENSG00000149927 | UGGGUAC  |
| ENSG00000149930 | CUGCCCC  |
| ENSG00000149930 | GAGAUGA  |
| ENSG00000149930 | GCACCAU  |
| ENSG00000149930 | UUGACAC  |
| ENSG00000149932 | CCCUGAG  |
| ENSG00000149948 | AAAGUAC  |
| ENSG00000149948 | AAAGUGC  |
| ENSG00000149948 | AACAGUC  |
| ENSG00000149948 | AAUGCCC  |
| ENSG00000149948 | ACUUGGA  |
| ENSG00000149948 | AGCAGCA  |
| ENSG00000149948 | AGCAGCG  |
| ENSG00000149948 | AGCAGCU  |
| ENSG00000149948 | AUUGCAC  |
| ENSG00000149948 | CAGCAAA  |
| ENSG00000149948 | CAGUGCA  |
| ENSG00000149948 | CUACAAA  |
| ENSG00000149948 | CUCCCAA  |
| ENSG00000149948 | GAUUGUC  |
| ENSG00000149948 | GUCCAGA  |
| ENSG00000149948 | UCAACAG  |
| ENSG00000149948 | UCACAUU  |
| ENSG00000149948 | UCCCACA  |
| ENSG00000149948 | UCUGGAG  |
| ENSG00000149948 | UUAUGCA  |
| ENSG00000149972 | ACACACU  |
| ENSG00000149972 | UGCAUAU  |
| ENSG00000149972 | UUGACAC  |
| ENSG00000150051 | AAAGUAA  |
| ENSG00000150051 | AAGGCAC  |
| ENSG00000150051 | CCCACGU  |
| ENSG00000150051 | UCACAUU  |
| ENSG00000150051 | UCAUACA  |
| ENSG00000150054 | GGAAUGU  |
| ENSG00000150054 | UAUAAAAG |
| ENSG00000150076 | CAGCAAA  |
| ENSG00000150086 | ACUCCAG  |
| ENSG00000150086 | CCAGGAG  |
| ENSG00000150086 | CCCACCU  |
| ENSG00000150086 | GGGAACG  |
| ENSG00000150086 | UCACCAC  |
| ENSG00000150093 | AGCACCA  |
| ENSG00000150093 | UCUCAAG  |
| ENSG00000150281 | AAAACUG  |
| ENSG00000150281 | UACAAAG  |
| ENSG00000150316 | AAACUGU  |
| ENSG00000150316 | GAAAACA  |
| ENSG00000150316 | UAUUACC  |
| ENSG00000150347 | AAGGCAC  |
| ENSG00000150347 | AGUGCAA  |
| ENSG00000150347 | AUUGCAC  |
| ENSG00000150347 | CAAAGCA  |
| ENSG00000150347 | CUAUACA  |
| ENSG00000150347 | CUCAAAC  |
| ENSG00000150347 | GCAACUU  |
| ENSG00000150347 | GUAGUGU  |
| ENSG00000150347 | UUGGCAC  |
| ENSG00000150394 | UCUAGAG  |
| ENSG00000150394 | UUUUUGC  |
| ENSG00000150401 | AAAAAUC  |
| ENSG00000150401 | AAGGCAC  |

|                 |         |
|-----------------|---------|
| ENSG00000150401 | CUCAGGG |
| ENSG00000150401 | GAGGUAG |
| ENSG00000150401 | UGUAUAA |
| ENSG00000150403 | AAGGCAC |
| ENSG00000150455 | AGUGUGC |
| ENSG00000150455 | CUGGGGG |
| ENSG00000150455 | GGAGUCC |
| ENSG00000150455 | GUAGUGU |
| ENSG00000150457 | AAUACUG |
| ENSG00000150457 | AGCAGCU |
| ENSG00000150457 | GAGAAAU |
| ENSG00000150457 | GCAGCAU |
| ENSG00000150457 | GUAAACA |
| ENSG00000150457 | GUGCCAC |
| ENSG00000150459 | CAUAUUG |
| ENSG00000150459 | UUCUUGU |
| ENSG00000150471 | GCAGAAG |
| ENSG00000150471 | UAAUACA |
| ENSG00000150471 | UCUGGAG |
| ENSG00000150477 | CAAGAGC |
| ENSG00000150477 | UGAAAGG |
| ENSG00000150527 | AAAACUG |
| ENSG00000150527 | AAACUGU |
| ENSG00000150527 | AGCAAAA |
| ENSG00000150527 | AGUAACA |
| ENSG00000150527 | CAGUUAC |
| ENSG00000150527 | CCAUUAC |
| ENSG00000150527 | GUAACAG |
| ENSG00000150540 | CAGGAAC |
| ENSG00000150540 | CAGUAGA |
| ENSG00000150540 | GUCAGUU |
| ENSG00000150540 | UGGAUAA |
| ENSG00000150593 | AAAGCUG |
| ENSG00000150593 | AAAGGUA |
| ENSG00000150593 | AACACUG |
| ENSG00000150593 | AAGACAU |
| ENSG00000150593 | ACAGUAU |
| ENSG00000150593 | ACUUGGA |
| ENSG00000150593 | AGAUGUG |
| ENSG00000150593 | AGCAGCG |
| ENSG00000150593 | AGUGCUU |
| ENSG00000150593 | AUGCCUU |
| ENSG00000150593 | CAAAGCA |
| ENSG00000150593 | CAGACAG |
| ENSG00000150593 | CUACAAA |
| ENSG00000150593 | CUAGUCC |
| ENSG00000150593 | CUGGAAA |
| ENSG00000150593 | CUUACAG |
| ENSG00000150593 | UACAAAG |
| ENSG00000150593 | UAUAAAG |
| ENSG00000150593 | UCAACAG |
| ENSG00000150593 | UCACAUU |
| ENSG00000150593 | UCAUUUG |
| ENSG00000150593 | UCCUGU  |
| ENSG00000150593 | UGAAAGG |
| ENSG00000150594 | ACUGUUU |
| ENSG00000150594 | AUGGCUU |
| ENSG00000150594 | CACAGGG |
| ENSG00000150594 | CACCAGC |
| ENSG00000150594 | GGCAGGG |
| ENSG00000150594 | UCCUGU  |
| ENSG00000150594 | UGCAAAG |
| ENSG00000150594 | UGCAUUG |
| ENSG00000150594 | UUCAAGC |

|                 |         |
|-----------------|---------|
| ENSG00000150594 | UUGAUCA |
| ENSG00000150625 | AACUCUA |
| ENSG00000150625 | ACUGCAG |
| ENSG00000150625 | AUUGCAC |
| ENSG00000150625 | CAAAGCA |
| ENSG00000150625 | CUACAAA |
| ENSG00000150625 | GCUACAU |
| ENSG00000150625 | UCCCUUU |
| ENSG00000150625 | UGCUCAC |
| ENSG00000150625 | UUCUUGU |
| ENSG00000150625 | UUGGCAC |
| ENSG00000150630 | AUAAUAC |
| ENSG00000150630 | UUGAUCA |
| ENSG00000150672 | AAAAAUC |
| ENSG00000150672 | AAAGCUG |
| ENSG00000150672 | AAUUAUU |
| ENSG00000150672 | ACAUUCA |
| ENSG00000150672 | ACUCCAG |
| ENSG00000150672 | AGCACCA |
| ENSG00000150672 | AGCCCUU |
| ENSG00000150672 | AGUGCUG |
| ENSG00000150672 | AUAAAGU |
| ENSG00000150672 | AUGGCUU |
| ENSG00000150672 | CACAGUG |
| ENSG00000150672 | CCAGCAU |
| ENSG00000150672 | CUACAAA |
| ENSG00000150672 | CUCUUCC |
| ENSG00000150672 | CUGGGCA |
| ENSG00000150672 | GAAACAU |
| ENSG00000150672 | GAGCCCU |
| ENSG00000150672 | GAUUGUA |
| ENSG00000150672 | GAUUGUC |
| ENSG00000150672 | GCAACUU |
| ENSG00000150672 | GCACCAU |
| ENSG00000150672 | GCUACAU |
| ENSG00000150672 | GCUGUCU |
| ENSG00000150672 | GGAAUGU |
| ENSG00000150672 | GGAGUGU |
| ENSG00000150672 | GGUGGUU |
| ENSG00000150672 | GUAAACA |
| ENSG00000150672 | GUGCUUG |
| ENSG00000150672 | GUGUGGC |
| ENSG00000150672 | UACAAAG |
| ENSG00000150672 | UCUCACC |
| ENSG00000150672 | UGACUGU |
| ENSG00000150672 | UGUGCUU |
| ENSG00000150672 | UGUGUCA |
| ENSG00000150672 | UUGAUCA |
| ENSG00000150712 | AAAAACC |
| ENSG00000150712 | AAAUUUC |
| ENSG00000150712 | AACCUUG |
| ENSG00000150712 | AAGGCAC |
| ENSG00000150712 | AAUCACU |
| ENSG00000150712 | ACAAUAU |
| ENSG00000150712 | ACAGUAU |
| ENSG00000150712 | ACUUGGA |
| ENSG00000150712 | AGUGCAA |
| ENSG00000150712 | AGUGCUG |
| ENSG00000150712 | AGUGCUU |
| ENSG00000150712 | AUAUAAC |
| ENSG00000150712 | CAGCAGA |
| ENSG00000150712 | CUUGGAG |
| ENSG00000150712 | GAGGUAG |
| ENSG00000150712 | GGAAUGU |

|                 |          |
|-----------------|----------|
| ENSG00000150712 | GUGCAAA  |
| ENSG00000150712 | GUGCCUG  |
| ENSG00000150712 | GUGCUUG  |
| ENSG00000150712 | UGCAUUAU |
| ENSG00000150760 | GGCAAGA  |
| ENSG00000150764 | AAAGAAU  |
| ENSG00000150764 | AAAGCUG  |
| ENSG00000150764 | AACACUG  |
| ENSG00000150764 | AAGAACC  |
| ENSG00000150764 | ACAGUAU  |
| ENSG00000150764 | AGCAAAA  |
| ENSG00000150764 | AGCAGCG  |
| ENSG00000150764 | AGCAGCU  |
| ENSG00000150764 | GAGAAAU  |
| ENSG00000150764 | GCUGUCU  |
| ENSG00000150764 | GGCAGUG  |
| ENSG00000150764 | UCCCACA  |
| ENSG00000150764 | UCUCCAA  |
| ENSG00000150764 | UGCAAAG  |
| ENSG00000150764 | UGUAUAA  |
| ENSG00000150764 | UUCCAUU  |
| ENSG00000150764 | UUCUAAU  |
| ENSG00000150764 | UUGGCAA  |
| ENSG00000150768 | CUGGACU  |
| ENSG00000150776 | AAUCUCA  |
| ENSG00000150776 | AGCACCA  |
| ENSG00000150776 | AGGUAGU  |
| ENSG00000150776 | CAAAGCA  |
| ENSG00000150776 | CCUGAG   |
| ENSG00000150776 | CUCUUCC  |
| ENSG00000150776 | GAGAAGA  |
| ENSG00000150776 | GAGGUAG  |
| ENSG00000150776 | GGAAUGU  |
| ENSG00000150776 | UGAGAAG  |
| ENSG00000150776 | UGUGCUU  |
| ENSG00000150782 | AAUUUUA  |
| ENSG00000150893 | AAUACUG  |
| ENSG00000150893 | CUAGGCU  |
| ENSG00000150893 | GAGGUAG  |
| ENSG00000150893 | GAGGUAU  |
| ENSG00000150893 | GGCUCAG  |
| ENSG00000150893 | GUCUUGC  |
| ENSG00000150893 | UGUCUUU  |
| ENSG00000150907 | AAAAAUC  |
| ENSG00000150907 | AACAAAC  |
| ENSG00000150907 | AACAGUC  |
| ENSG00000150907 | AACCUGG  |
| ENSG00000150907 | AACCUGU  |
| ENSG00000150907 | AAUGUUG  |
| ENSG00000150907 | ACAGUAU  |
| ENSG00000150907 | AGCAGCA  |
| ENSG00000150907 | AGUAGAC  |
| ENSG00000150907 | AUAUUUAU |
| ENSG00000150907 | AUGGCAC  |
| ENSG00000150907 | CAGACAG  |
| ENSG00000150907 | CUACAGU  |
| ENSG00000150907 | CUUUGGU  |
| ENSG00000150907 | GCAUCCC  |
| ENSG00000150907 | GCUGUCU  |
| ENSG00000150907 | GUAACAG  |
| ENSG00000150907 | GUAGUGU  |
| ENSG00000150907 | UAGUGAG  |
| ENSG00000150907 | UAUAAUA  |
| ENSG00000150907 | UCCAGUU  |

|                 |         |
|-----------------|---------|
| ENSG00000150907 | UCUGGAA |
| ENSG00000150907 | UGCAUAG |
| ENSG00000150907 | UGUGUCA |
| ENSG00000150907 | UUGGCAA |
| ENSG00000150907 | UUGUGUC |
| ENSG00000150907 | UUUGCAA |
| ENSG00000150938 | AAAAGUA |
| ENSG00000150938 | AAAGAGG |
| ENSG00000150938 | AAAGUAA |
| ENSG00000150938 | AAAGUGC |
| ENSG00000150938 | AAGGUGC |
| ENSG00000150938 | AAGUCAC |
| ENSG00000150938 | AAGUGCA |
| ENSG00000150938 | ACAUUCA |
| ENSG00000150938 | CAGUAGU |
| ENSG00000150938 | GGAAUGU |
| ENSG00000150938 | GUGCUUG |
| ENSG00000150938 | UACAAAG |
| ENSG00000150967 | ACUGGCU |
| ENSG00000150967 | AGGUAGU |
| ENSG00000150967 | GAGGUAG |
| ENSG00000150967 | GCAGGAC |
| ENSG00000150967 | UCACAGG |
| ENSG00000150967 | UCACAGU |
| ENSG00000150977 | CUGCAGC |
| ENSG00000150995 | AGUGCAA |
| ENSG00000150995 | UCAAGUA |
| ENSG00000151012 | CAGUGCA |
| ENSG00000151012 | CCAGUGC |
| ENSG00000151012 | GUCUUGC |
| ENSG00000151012 | UCUCCAA |
| ENSG00000151012 | UGCAUUG |
| ENSG00000151012 | UGUCUUU |
| ENSG00000151012 | UUCCUAG |
| ENSG00000151014 | AGUGCAA |
| ENSG00000151014 | CUGGAAA |
| ENSG00000151014 | GCUGGAU |
| ENSG00000151014 | GUGCAAA |
| ENSG00000151014 | UAAGACG |
| ENSG00000151025 | AAGUUGU |
| ENSG00000151025 | ACAGUAU |
| ENSG00000151025 | AUGCAUU |
| ENSG00000151025 | AUUGCAC |
| ENSG00000151025 | GGCAGUG |
| ENSG00000151025 | UAUUGCU |
| ENSG00000151025 | UUGUGUC |
| ENSG00000151033 | UCUCCAA |
| ENSG00000151062 | CUGGACU |
| ENSG00000151062 | UGCUGAC |
| ENSG00000151067 | AAAAAUC |
| ENSG00000151067 | AAAACUG |
| ENSG00000151067 | AAAGCUG |
| ENSG00000151067 | AAAGGUA |
| ENSG00000151067 | AAAUUUC |
| ENSG00000151067 | AACCUGU |
| ENSG00000151067 | AAGUGCA |
| ENSG00000151067 | AAUACUG |
| ENSG00000151067 | AAUGCCC |
| ENSG00000151067 | ACAUUAC |
| ENSG00000151067 | ACCCAUU |
| ENSG00000151067 | ACUCCAG |
| ENSG00000151067 | AGUGGUU |
| ENSG00000151067 | AUAAUAC |
| ENSG00000151067 | AUAUUAU |



|                 |          |
|-----------------|----------|
| ENSG00000151067 | AUUCAUU  |
| ENSG00000151067 | AUUGCAC  |
| ENSG00000151067 | CACCACC  |
| ENSG00000151067 | CAGCAAA  |
| ENSG00000151067 | CCCCCAG  |
| ENSG00000151067 | CCGGUUC  |
| ENSG00000151067 | CCUUCUU  |
| ENSG00000151067 | CUGGCUC  |
| ENSG00000151067 | CUUGGAG  |
| ENSG00000151067 | GACCUGG  |
| ENSG00000151067 | GACUUCC  |
| ENSG00000151067 | GAGAAGA  |
| ENSG00000151067 | GAGAUGA  |
| ENSG00000151067 | GCAGCAU  |
| ENSG00000151067 | GCCUGGA  |
| ENSG00000151067 | GGCCUG   |
| ENSG00000151067 | GUAAACA  |
| ENSG00000151067 | UAAUACA  |
| ENSG00000151067 | UAAUGCU  |
| ENSG00000151067 | UACAGUU  |
| ENSG00000151067 | UAUUGCU  |
| ENSG00000151067 | UCAACAG  |
| ENSG00000151067 | UCAAGUA  |
| ENSG00000151067 | UCACACA  |
| ENSG00000151067 | UCCUGU   |
| ENSG00000151067 | UGAAGCU  |
| ENSG00000151067 | UGAGAAG  |
| ENSG00000151067 | UGCAAAG  |
| ENSG00000151067 | UGCAGCU  |
| ENSG00000151067 | UGCAUAG  |
| ENSG00000151067 | UGCAUUA  |
| ENSG00000151067 | UGGGACA  |
| ENSG00000151067 | UUGGCAC  |
| ENSG00000151067 | UUUGCAC  |
| ENSG00000151079 | AAGGCAC  |
| ENSG00000151079 | ACUCAGC  |
| ENSG00000151079 | AGGGAGG  |
| ENSG00000151079 | CAAAGCA  |
| ENSG00000151079 | GAGGUAG  |
| ENSG00000151079 | UGCAGCU  |
| ENSG00000151079 | UGCAUUA  |
| ENSG00000151090 | AAAGUAC  |
| ENSG00000151090 | AAAGUAU  |
| ENSG00000151090 | AAAGUGC  |
| ENSG00000151090 | AAAUCCC  |
| ENSG00000151090 | AAAUUUC  |
| ENSG00000151090 | AAGGCAC  |
| ENSG00000151090 | AAUCCUU  |
| ENSG00000151090 | ACACACC  |
| ENSG00000151090 | ACAGUAC  |
| ENSG00000151090 | ACUGUUU  |
| ENSG00000151090 | AGCAAAA  |
| ENSG00000151090 | AGUGCUU  |
| ENSG00000151090 | AUACAAG  |
| ENSG00000151090 | AUAUUAU  |
| ENSG00000151090 | AUGGCUU  |
| ENSG00000151090 | AUUCAUU  |
| ENSG00000151090 | CAA AUGC |
| ENSG00000151090 | CACACCG  |
| ENSG00000151090 | CACAGUG  |
| ENSG00000151090 | CAGUAGU  |
| ENSG00000151090 | CAUGGGU  |
| ENSG00000151090 | CUGCAGG  |
| ENSG00000151090 | CUGGAAA  |

|                 |         |
|-----------------|---------|
| ENSG00000151090 | CUUGUGU |
| ENSG00000151090 | GAUUGUA |
| ENSG00000151090 | GCAGCAU |
| ENSG00000151090 | GCCUGU  |
| ENSG00000151090 | GCUACAU |
| ENSG00000151090 | GGAAUGU |
| ENSG00000151090 | GGGAGCU |
| ENSG00000151090 | GUCUUGC |
| ENSG00000151090 | GUGCAA  |
| ENSG00000151090 | UACAAAG |
| ENSG00000151090 | UAUUGCU |
| ENSG00000151090 | UCACAGU |
| ENSG00000151090 | UCACAUU |
| ENSG00000151090 | UCUGGAA |
| ENSG00000151090 | UGAAAUG |
| ENSG00000151090 | UGAGGAC |
| ENSG00000151090 | UGCAAAG |
| ENSG00000151090 | UGCCUG  |
| ENSG00000151090 | UGGGUAC |
| ENSG00000151090 | UGUCUUU |
| ENSG00000151090 | UGUGCUU |
| ENSG00000151090 | UUCAAAU |
| ENSG00000151090 | UUUCAAC |
| ENSG00000151117 | AGCACCA |
| ENSG00000151117 | AGUAACA |
| ENSG00000151117 | AUGUGCC |
| ENSG00000151117 | CAAAGCA |
| ENSG00000151117 | CAGACAG |
| ENSG00000151117 | CAGGCUC |
| ENSG00000151117 | CCCUGAG |
| ENSG00000151117 | GCACCAU |
| ENSG00000151117 | GUCAUUG |
| ENSG00000151117 | GUGCCUG |
| ENSG00000151117 | UGAGGAC |
| ENSG00000151117 | UGCAUUG |
| ENSG00000151117 | UUGGCAA |
| ENSG00000151117 | UUGGCAC |
| ENSG00000151135 | AAAGGUA |
| ENSG00000151135 | AACAUUC |
| ENSG00000151135 | AAGGCAC |
| ENSG00000151135 | CCUUCAU |
| ENSG00000151135 | GUAACAG |
| ENSG00000151136 | CAAUUGC |
| ENSG00000151148 | CUGGAAA |
| ENSG00000151148 | GUCAACA |
| ENSG00000151148 | UCUGGAA |
| ENSG00000151148 | UGCAUAG |
| ENSG00000151150 | AAGGCGC |
| ENSG00000151150 | AAGGUGC |
| ENSG00000151150 | ACUGCAU |
| ENSG00000151150 | CAGCAGA |
| ENSG00000151150 | CCAGUAC |
| ENSG00000151150 | CCAGUGC |
| ENSG00000151150 | GAGGCAG |
| ENSG00000151150 | GCAGCAU |
| ENSG00000151150 | GCCCUUA |
| ENSG00000151150 | UGCAAAG |
| ENSG00000151150 | UGCAGCU |
| ENSG00000151150 | UUGGCAA |
| ENSG00000151208 | AAGUGCA |
| ENSG00000151208 | ACAGUAC |
| ENSG00000151208 | AGUGCAA |
| ENSG00000151208 | AUUGCAC |
| ENSG00000151208 | UCCCUUU |

|                 |          |
|-----------------|----------|
| ENSG00000151208 | UGACCUA  |
| ENSG00000151224 | AGCACCA  |
| ENSG00000151224 | GGCUCAG  |
| ENSG00000151224 | GGGAGCU  |
| ENSG00000151224 | UGGCUGC  |
| ENSG00000151229 | AAGGCAC  |
| ENSG00000151229 | AGCAGCU  |
| ENSG00000151229 | GCAGCAU  |
| ENSG00000151229 | GGCAGUG  |
| ENSG00000151229 | UUCAAGC  |
| ENSG00000151239 | AAAGCUG  |
| ENSG00000151239 | CAGCAGG  |
| ENSG00000151239 | UAUAAAAG |
| ENSG00000151239 | UGAAAUG  |
| ENSG00000151239 | UUAUGCA  |
| ENSG00000151239 | UUCAAGC  |
| ENSG00000151240 | AAAGAGC  |
| ENSG00000151240 | AAAGAGG  |
| ENSG00000151240 | AAAGCUG  |
| ENSG00000151240 | AAGGUGC  |
| ENSG00000151240 | ACAUUAC  |
| ENSG00000151240 | AUAAUAC  |
| ENSG00000151240 | AUAUUAU  |
| ENSG00000151240 | AUGGCUU  |
| ENSG00000151240 | CGUACCG  |
| ENSG00000151240 | UAAUACA  |
| ENSG00000151240 | UACAAAG  |
| ENSG00000151247 | AAAGAAU  |
| ENSG00000151247 | AGCAGCA  |
| ENSG00000151247 | AGCAGCG  |
| ENSG00000151247 | AGCAGCU  |
| ENSG00000151247 | AUCACUA  |
| ENSG00000151247 | CACUGUU  |
| ENSG00000151247 | CAGUCCA  |
| ENSG00000151247 | CUCCAA   |
| ENSG00000151247 | CUUCACC  |
| ENSG00000151247 | CUUUGGU  |
| ENSG00000151247 | UCACACA  |
| ENSG00000151247 | UGAAAUG  |
| ENSG00000151276 | ACAUUAC  |
| ENSG00000151276 | GGCUCAG  |
| ENSG00000151276 | UCACAUU  |
| ENSG00000151276 | UUGGCAC  |
| ENSG00000151292 | ACAUUCA  |
| ENSG00000151292 | GAGAUGA  |
| ENSG00000151320 | AAGGCAC  |
| ENSG00000151320 | AAUCUCU  |
| ENSG00000151320 | AAUUAUU  |
| ENSG00000151320 | ACUGUGU  |
| ENSG00000151320 | AGCUGCC  |
| ENSG00000151320 | AUACAAG  |
| ENSG00000151320 | AUGGAUU  |
| ENSG00000151320 | CACCAGC  |
| ENSG00000151320 | CCCCCAG  |
| ENSG00000151320 | CUUGGGC  |
| ENSG00000151320 | GAAGGAA  |
| ENSG00000151320 | GAGGUAG  |
| ENSG00000151320 | GAUUGUC  |
| ENSG00000151320 | GGCAGUG  |
| ENSG00000151320 | GUCAUUG  |
| ENSG00000151320 | UCUUGAG  |
| ENSG00000151320 | UGCAUAG  |
| ENSG00000151320 | UGGGACA  |
| ENSG00000151320 | UUCCUCG  |

|                 |         |
|-----------------|---------|
| ENSG00000151320 | UUCUUGU |
| ENSG00000151322 | AAAGAAU |
| ENSG00000151322 | AAAGUGC |
| ENSG00000151322 | AAGUGCU |
| ENSG00000151322 | AAUUAUU |
| ENSG00000151322 | GUAUUCU |
| ENSG00000151322 | UCACAGG |
| ENSG00000151322 | UUGAUCA |
| ENSG00000151327 | AAAGUAU |
| ENSG00000151327 | AAUUUUA |
| ENSG00000151327 | AGUGCUU |
| ENSG00000151327 | CACAGUG |
| ENSG00000151327 | UGCAUAG |
| ENSG00000151327 | UGCAUUA |
| ENSG00000151338 | AAUCACU |
| ENSG00000151338 | ACUGUUU |
| ENSG00000151338 | AGAUGUG |
| ENSG00000151338 | AGUGGUU |
| ENSG00000151338 | CAAAGUG |
| ENSG00000151338 | CACCAGC |
| ENSG00000151338 | CAGCAA  |
| ENSG00000151338 | CAGCAGA |
| ENSG00000151338 | CAGCAGG |
| ENSG00000151338 | CUGGAAA |
| ENSG00000151338 | GAAGGAA |
| ENSG00000151338 | GUGCAA  |
| ENSG00000151338 | UCUGGAG |
| ENSG00000151338 | UGAAGUG |
| ENSG00000151348 | AGCCAGU |
| ENSG00000151413 | AAUUUUA |
| ENSG00000151413 | UUGUGAC |
| ENSG00000151413 | UUUCAAC |
| ENSG00000151458 | AACACUG |
| ENSG00000151458 | AAGGUGC |
| ENSG00000151458 | ACUGCAU |
| ENSG00000151458 | AGUGCUU |
| ENSG00000151458 | AUGCACC |
| ENSG00000151458 | GGAUUUU |
| ENSG00000151458 | GGCAGCG |
| ENSG00000151458 | UACAGUU |
| ENSG00000151458 | UCAAGUA |
| ENSG00000151458 | UUCAAAU |
| ENSG00000151461 | AAUUGCU |
| ENSG00000151461 | AGAUGUG |
| ENSG00000151461 | GAGAAGA |
| ENSG00000151461 | UGAAGCU |
| ENSG00000151468 | UAGACUG |
| ENSG00000151468 | UCCCUUG |
| ENSG00000151474 | AAAACUG |
| ENSG00000151474 | AAAAGUA |
| ENSG00000151474 | AAAGUGC |
| ENSG00000151474 | AACCUGU |
| ENSG00000151474 | AAGGCAC |
| ENSG00000151474 | AAGUGUG |
| ENSG00000151474 | AAUCUCU |
| ENSG00000151474 | ACAAUAU |
| ENSG00000151474 | ACUGUUU |
| ENSG00000151474 | AGCACCA |
| ENSG00000151474 | AGUGCUG |
| ENSG00000151474 | AGUGCUU |
| ENSG00000151474 | AUACAAG |
| ENSG00000151474 | AUGGCUU |
| ENSG00000151474 | AUGUAAU |
| ENSG00000151474 | CACAGUG |

|                 |         |
|-----------------|---------|
| ENSG00000151474 | CCAGGAG |
| ENSG00000151474 | CUCACAC |
| ENSG00000151474 | CUUUGGU |
| ENSG00000151474 | GACAACU |
| ENSG00000151474 | GAGGCAG |
| ENSG00000151474 | GCUGGUG |
| ENSG00000151474 | GGCAGCG |
| ENSG00000151474 | GGCAGUG |
| ENSG00000151474 | GGGAGCU |
| ENSG00000151474 | GGGUAAG |
| ENSG00000151474 | GUAAACA |
| ENSG00000151474 | GUCCAGA |
| ENSG00000151474 | GUGAGGU |
| ENSG00000151474 | UAUAAUA |
| ENSG00000151474 | UCAUUUG |
| ENSG00000151474 | UCCCUUG |
| ENSG00000151474 | UGACAUC |
| ENSG00000151474 | UGCAAAG |
| ENSG00000151474 | UGCAUUA |
| ENSG00000151474 | UGUGCUU |
| ENSG00000151474 | UUGAGGC |
| ENSG00000151474 | UUGGCAA |
| ENSG00000151474 | UUGGCAC |
| ENSG00000151474 | UUUGCAC |
| ENSG00000151490 | AAAGUGC |
| ENSG00000151490 | AAGUCUU |
| ENSG00000151490 | ACUGUAG |
| ENSG00000151490 | GAGGUAG |
| ENSG00000151490 | UGCUCAC |
| ENSG00000151490 | UGGCCAC |
| ENSG00000151491 | AAUGCCC |
| ENSG00000151491 | AUUGCAC |
| ENSG00000151491 | CUGACUC |
| ENSG00000151491 | CUUACAG |
| ENSG00000151491 | GGCAUUG |
| ENSG00000151491 | UAUUGCU |
| ENSG00000151491 | UCCCUUG |
| ENSG00000151491 | UCCCUUU |
| ENSG00000151502 | AAAGAAU |
| ENSG00000151502 | AACACUG |
| ENSG00000151502 | ACUGCAG |
| ENSG00000151502 | CUGCAGC |
| ENSG00000151502 | GAAACAU |
| ENSG00000151502 | GAGGUAG |
| ENSG00000151502 | GGAGGCA |
| ENSG00000151502 | UGCAGCU |
| ENSG00000151502 | UUGGCAA |
| ENSG00000151502 | UUGGCAC |
| ENSG00000151503 | UAUAAAG |
| ENSG00000151514 | AACAGUC |
| ENSG00000151514 | CUACAAA |
| ENSG00000151532 | AAAACUG |
| ENSG00000151532 | AAAGAAU |
| ENSG00000151532 | AAAUUUC |
| ENSG00000151532 | AACAGUC |
| ENSG00000151532 | AAGACAU |
| ENSG00000151532 | AAUCACU |
| ENSG00000151532 | AAUCUCU |
| ENSG00000151532 | AAUUAUU |
| ENSG00000151532 | AAUUGCU |
| ENSG00000151532 | ACUCAGC |
| ENSG00000151532 | ACUGUUU |
| ENSG00000151532 | AGCAGCA |
| ENSG00000151532 | AGCCCUU |

|                 |         |
|-----------------|---------|
| ENSG00000151532 | AGCCUGC |
| ENSG00000151532 | AUCAUU  |
| ENSG00000151532 | CAGCAGG |
| ENSG00000151532 | CCAUUAC |
| ENSG00000151532 | CUCAGGG |
| ENSG00000151532 | GAAAACA |
| ENSG00000151532 | GAGUUGG |
| ENSG00000151532 | GCCCUUA |
| ENSG00000151532 | GGUGGGC |
| ENSG00000151532 | GUCAGUU |
| ENSG00000151532 | GUGGGGA |
| ENSG00000151532 | UAAUGCU |
| ENSG00000151532 | UCACCAC |
| ENSG00000151532 | UGAAGCU |
| ENSG00000151532 | UGUCUUU |
| ENSG00000151532 | UUCAAAU |
| ENSG00000151532 | UUGUUCG |
| ENSG00000151552 | AAGGCAC |
| ENSG00000151553 | AAAGUGC |
| ENSG00000151553 | AAAUGGU |
| ENSG00000151553 | AAUCACU |
| ENSG00000151553 | AGCAGCA |
| ENSG00000151553 | AGGCAGG |
| ENSG00000151553 | AUCACUA |
| ENSG00000151553 | GAUUGUC |
| ENSG00000151553 | GGAGGCA |
| ENSG00000151553 | UCCUGAG |
| ENSG00000151553 | UGCCUG  |
| ENSG00000151576 | CAAUUGC |
| ENSG00000151576 | UAAUAUC |
| ENSG00000151576 | UCAACAG |
| ENSG00000151612 | ACUCCAG |
| ENSG00000151612 | AGCUGCC |
| ENSG00000151612 | CACAGUG |
| ENSG00000151612 | CAGCUGG |
| ENSG00000151612 | CUCCAGC |
| ENSG00000151612 | CUUGUAU |
| ENSG00000151612 | CUUGUGU |
| ENSG00000151612 | GAAGGUC |
| ENSG00000151612 | GAUUGUC |
| ENSG00000151612 | GCAGAAG |
| ENSG00000151612 | GCAGGUU |
| ENSG00000151612 | GGAAUGU |
| ENSG00000151612 | GGGUCUU |
| ENSG00000151612 | GUAGUGU |
| ENSG00000151612 | UCACAGU |
| ENSG00000151612 | UGCAGCU |
| ENSG00000151612 | UUCUUGU |
| ENSG00000151615 | AUGUAAU |
| ENSG00000151615 | CAGCAGG |
| ENSG00000151617 | AAAUGGU |
| ENSG00000151617 | CAGUCUG |
| ENSG00000151617 | UCACAGU |
| ENSG00000151617 | UCCUAUA |
| ENSG00000151617 | UGAAAUG |
| ENSG00000151617 | UUGGCAC |
| ENSG00000151623 | AAACGGU |
| ENSG00000151623 | AAUUAUU |
| ENSG00000151623 | AGUACUG |
| ENSG00000151623 | CUUACAG |
| ENSG00000151623 | GUAAACA |
| ENSG00000151623 | UACAAAG |
| ENSG00000151623 | UCCCUUG |
| ENSG00000151623 | UCCCUUU |

|                 |          |
|-----------------|----------|
| ENSG00000151623 | UGGGACA  |
| ENSG00000151640 | AGCAGCU  |
| ENSG00000151657 | AACAAAC  |
| ENSG00000151657 | AUACAAG  |
| ENSG00000151657 | CAGUAGA  |
| ENSG00000151657 | UUCAAAU  |
| ENSG00000151657 | UUUCAAC  |
| ENSG00000151692 | AAGGCAC  |
| ENSG00000151692 | ACCUGGA  |
| ENSG00000151692 | AGGAUGU  |
| ENSG00000151692 | AGUGCUU  |
| ENSG00000151692 | AUGGCUU  |
| ENSG00000151692 | CCAGCAU  |
| ENSG00000151692 | CCCUGAG  |
| ENSG00000151692 | CUUUGGU  |
| ENSG00000151692 | GCUGGUG  |
| ENSG00000151692 | GGGGCAG  |
| ENSG00000151692 | GGUUUAC  |
| ENSG00000151692 | GUAUUCU  |
| ENSG00000151692 | UAGUGAG  |
| ENSG00000151692 | UCUCAAG  |
| ENSG00000151692 | UGAAAUG  |
| ENSG00000151692 | UGCAU AU |
| ENSG00000151692 | UUCAAAU  |
| ENSG00000151692 | UUCUAAU  |
| ENSG00000151692 | UUGACAC  |
| ENSG00000151694 | ACCACAG  |
| ENSG00000151694 | ACCAGCA  |
| ENSG00000151694 | CAGUGCA  |
| ENSG00000151694 | CCAGCAU  |
| ENSG00000151694 | GCACCAU  |
| ENSG00000151694 | UACAAAG  |
| ENSG00000151694 | UACAGUU  |
| ENSG00000151702 | UUGUGAC  |
| ENSG00000151704 | AGCAGCU  |
| ENSG00000151715 | AAAGUAC  |
| ENSG00000151718 | AAAGUGC  |
| ENSG00000151718 | AACCUGG  |
| ENSG00000151718 | AACCUGU  |
| ENSG00000151718 | AAGUGCA  |
| ENSG00000151718 | ACAUUAC  |
| ENSG00000151718 | ACCCUGU  |
| ENSG00000151718 | AGCUGCC  |
| ENSG00000151718 | AUACAAG  |
| ENSG00000151718 | CAGUCCA  |
| ENSG00000151718 | CCUUCAU  |
| ENSG00000151718 | CUAGGCU  |
| ENSG00000151718 | GAAAACA  |
| ENSG00000151718 | GAAACAU  |
| ENSG00000151718 | GUGAAUG  |
| ENSG00000151718 | GUUCAUG  |
| ENSG00000151718 | UAUAAAAG |
| ENSG00000151718 | UCACAUU  |
| ENSG00000151718 | UCCAGUU  |
| ENSG00000151718 | UCCUGAG  |
| ENSG00000151718 | UGACCUA  |
| ENSG00000151718 | UUGUGAC  |
| ENSG00000151718 | UUGUUCG  |
| ENSG00000151726 | AACAUUC  |
| ENSG00000151726 | AAGGCAC  |
| ENSG00000151726 | ACAUUCA  |
| ENSG00000151726 | CAAAACU  |
| ENSG00000151726 | GCAGAAG  |
| ENSG00000151726 | GGCAGUG  |

|                 |         |
|-----------------|---------|
| ENSG00000151726 | GGUUUAC |
| ENSG00000151726 | GUGCAAA |
| ENSG00000151726 | UAUAAAG |
| ENSG00000151726 | UCCUAUA |
| ENSG00000151746 | GUGCUUG |
| ENSG00000151746 | UGUGCUU |
| ENSG00000151773 | CCUUCUG |
| ENSG00000151773 | GUCAUUG |
| ENSG00000151778 | AAGACAU |
| ENSG00000151789 | AAUUAUU |
| ENSG00000151789 | AUUGCAC |
| ENSG00000151789 | UAUUGCU |
| ENSG00000151812 | GUAAACA |
| ENSG00000151812 | UCACAGG |
| ENSG00000151812 | UCACAGU |
| ENSG00000151834 | ACAUAGA |
| ENSG00000151835 | AAUUGCU |
| ENSG00000151835 | CUUUGGU |
| ENSG00000151835 | UUGGUUC |
| ENSG00000151846 | AAAGUUU |
| ENSG00000151846 | AAUUUUA |
| ENSG00000151846 | CAAAGUG |
| ENSG00000151846 | UAUAAUA |
| ENSG00000151849 | UCAUGAU |
| ENSG00000151876 | AAUUAUU |
| ENSG00000151881 | UGGAUAA |
| ENSG00000151892 | UCACAAG |
| ENSG00000151893 | AAAGUGC |
| ENSG00000151893 | AAGGCAC |
| ENSG00000151893 | AAGUGCA |
| ENSG00000151893 | AAUGCCC |
| ENSG00000151893 | AGCAGCG |
| ENSG00000151893 | AGCAGCU |
| ENSG00000151893 | AGUGCUU |
| ENSG00000151893 | CAAAGUG |
| ENSG00000151893 | CCAGUGC |
| ENSG00000151893 | CUGCCC  |
| ENSG00000151893 | GAGUUGG |
| ENSG00000151893 | GAUUGUC |
| ENSG00000151893 | UACAAAG |
| ENSG00000151893 | UCCUGAG |
| ENSG00000151893 | UUGGUCC |
| ENSG00000151914 | CUGCAGC |
| ENSG00000151914 | CUGCAGG |
| ENSG00000151914 | GAGGUAU |
| ENSG00000151923 | AUACAAG |
| ENSG00000151923 | CCUUCAU |
| ENSG00000151923 | CUAUACA |
| ENSG00000151923 | CUUCACC |
| ENSG00000151923 | GAAUUGU |
| ENSG00000151923 | UCACCAC |
| ENSG00000151952 | AUAUUAU |
| ENSG00000151952 | CUUACAG |
| ENSG00000151952 | UACAGUU |
| ENSG00000151952 | UAUAAAG |
| ENSG00000151952 | UGAUCCA |
| ENSG00000151967 | AACAUUC |
| ENSG00000151967 | ACAUUCA |
| ENSG00000151967 | ACCACAG |
| ENSG00000151967 | ACUGUAG |
| ENSG00000151967 | AGCACCA |
| ENSG00000151967 | AGGCAGG |
| ENSG00000151967 | AGGUAGU |
| ENSG00000151967 | AGUACUG |



|                 |          |
|-----------------|----------|
| ENSG00000151967 | CUACAGU  |
| ENSG00000151967 | GAGGCAG  |
| ENSG00000151967 | GUCAACA  |
| ENSG00000151967 | UGUUGAA  |
| ENSG00000152049 | AUACAAG  |
| ENSG00000152049 | CCCCUGG  |
| ENSG00000152049 | GCACCAU  |
| ENSG00000152049 | GUGACAG  |
| ENSG00000152049 | UCAAGUA  |
| ENSG00000152056 | AAAGUAA  |
| ENSG00000152056 | AUCCCUU  |
| ENSG00000152056 | CAAAACU  |
| ENSG00000152056 | CAGCAAA  |
| ENSG00000152056 | CAGCAGA  |
| ENSG00000152056 | CAGCAGG  |
| ENSG00000152056 | GAAAACA  |
| ENSG00000152056 | UACAAAG  |
| ENSG00000152056 | UCAAGUA  |
| ENSG00000152056 | UUCAAAU  |
| ENSG00000152056 | UUGGCAA  |
| ENSG00000152056 | UUGGCAC  |
| ENSG00000152056 | UUGGUUC  |
| ENSG00000152092 | ACAAUUAU |
| ENSG00000152092 | AUACCUC  |
| ENSG00000152092 | CAAGAGC  |
| ENSG00000152092 | CCAUUAC  |
| ENSG00000152092 | CCUUCUU  |
| ENSG00000152092 | CUCUGGG  |
| ENSG00000152092 | CUGGGCA  |
| ENSG00000152092 | GCUUCCU  |
| ENSG00000152092 | GGCAGCG  |
| ENSG00000152092 | UAAUAGU  |
| ENSG00000152092 | UAAUGCU  |
| ENSG00000152092 | UCCCUGU  |
| ENSG00000152092 | UUGGCAA  |
| ENSG00000152092 | UUGGCAC  |
| ENSG00000152102 | AAAACUG  |
| ENSG00000152102 | AAAAGUA  |
| ENSG00000152102 | AAAGUAA  |
| ENSG00000152102 | AAAGUAU  |
| ENSG00000152102 | AAGUGCA  |
| ENSG00000152102 | AAGUGCU  |
| ENSG00000152102 | AAGUUGU  |
| ENSG00000152102 | ACAAUUAU |
| ENSG00000152102 | ACUGGCU  |
| ENSG00000152102 | AGCACCA  |
| ENSG00000152102 | AGUGAUC  |
| ENSG00000152102 | AUACAAG  |
| ENSG00000152102 | AUGAUGC  |
| ENSG00000152102 | AUGCAUU  |
| ENSG00000152102 | AUGCCUU  |
| ENSG00000152102 | CAGUCCA  |
| ENSG00000152102 | CUGCAGC  |
| ENSG00000152102 | CUGGCUC  |
| ENSG00000152102 | GAAAACA  |
| ENSG00000152102 | GCAGGUU  |
| ENSG00000152102 | GGAAUGU  |
| ENSG00000152102 | GGAGGCA  |
| ENSG00000152102 | GGAUUUC  |
| ENSG00000152102 | UAAGACG  |
| ENSG00000152102 | UAGUGAG  |
| ENSG00000152102 | UAUAAAG  |
| ENSG00000152102 | UCCCUUG  |
| ENSG00000152102 | UGAUCCA  |

|                 |         |
|-----------------|---------|
| ENSG00000152102 | UUUGCAA |
| ENSG00000152102 | UUUGCAC |
| ENSG00000152128 | GUGCUUG |
| ENSG00000152128 | UGCAAAG |
| ENSG00000152128 | UUGGCAC |
| ENSG00000152137 | UGAAAUG |
| ENSG00000152137 | UUGGUUC |
| ENSG00000152154 | UGCAUAG |
| ENSG00000152154 | UGUGCUU |
| ENSG00000152192 | AACACUG |
| ENSG00000152192 | AAGUGUG |
| ENSG00000152192 | ACAAUAU |
| ENSG00000152192 | AGUAGAC |
| ENSG00000152192 | AGUGCUG |
| ENSG00000152192 | AGUGCUU |
| ENSG00000152192 | CAGUCUG |
| ENSG00000152192 | CCCUGUU |
| ENSG00000152192 | CUAUACA |
| ENSG00000152192 | GUCUCUG |
| ENSG00000152192 | GUGCAA  |
| ENSG00000152192 | UAGACUG |
| ENSG00000152192 | UGCAUAG |
| ENSG00000152192 | UGGGACA |
| ENSG00000152192 | UUCAAAU |
| ENSG00000152192 | UUGGUCC |
| ENSG00000152193 | ACAUAGA |
| ENSG00000152193 | AGUGCUU |
| ENSG00000152193 | AUGACAC |
| ENSG00000152193 | GUGCUUG |
| ENSG00000152193 | UCACAUU |
| ENSG00000152207 | UGGAGAU |
| ENSG00000152214 | AAUUUUA |
| ENSG00000152217 | GGCAUUG |
| ENSG00000152223 | AAGGCAC |
| ENSG00000152223 | ACUCAA  |
| ENSG00000152223 | CAGCAA  |
| ENSG00000152223 | CAGCAGG |
| ENSG00000152223 | GAGAUGA |
| ENSG00000152223 | GCUUCCU |
| ENSG00000152223 | GGCUCUG |
| ENSG00000152223 | GUCACUC |
| ENSG00000152223 | UCACAUU |
| ENSG00000152223 | UGAGAAG |
| ENSG00000152223 | UGAGAAU |
| ENSG00000152229 | AAAUCCC |
| ENSG00000152229 | CAAAGUG |
| ENSG00000152229 | UCCUGAG |
| ENSG00000152229 | UUUGCAA |
| ENSG00000152242 | AACACUG |
| ENSG00000152242 | AACAGUC |
| ENSG00000152242 | AAGUGCA |
| ENSG00000152242 | AAUGCCC |
| ENSG00000152242 | AAUUAAU |
| ENSG00000152242 | ACUCCAG |
| ENSG00000152242 | ACUGCAU |
| ENSG00000152242 | AGCAAAA |
| ENSG00000152242 | AUCACUA |
| ENSG00000152242 | AUCAUAC |
| ENSG00000152242 | AUUGCAC |
| ENSG00000152242 | CAAUUGC |
| ENSG00000152242 | CACAGUG |
| ENSG00000152242 | CAGCAGA |
| ENSG00000152242 | CCAGCAU |
| ENSG00000152242 | CCAGUGC |

|                 |         |
|-----------------|---------|
| ENSG00000152242 | CCAGUGU |
| ENSG00000152242 | CUCCAGC |
| ENSG00000152242 | CUGGAAA |
| ENSG00000152242 | CUUUGGU |
| ENSG00000152242 | GAAGGUC |
| ENSG00000152242 | GCACCAU |
| ENSG00000152242 | GCAGAAG |
| ENSG00000152242 | GGGUCUU |
| ENSG00000152242 | UCAAGUA |
| ENSG00000152242 | UCAUACA |
| ENSG00000152242 | UCAUGAU |
| ENSG00000152242 | UGAAGCU |
| ENSG00000152242 | UGCAUUG |
| ENSG00000152242 | UUAUGCA |
| ENSG00000152242 | UUGGUUC |
| ENSG00000152254 | UGAGAAG |
| ENSG00000152256 | AAUCCUU |
| ENSG00000152256 | CAGUGCA |
| ENSG00000152256 | UCACAGU |
| ENSG00000152266 | AAAGAAU |
| ENSG00000152266 | GCAGCAU |
| ENSG00000152268 | ACAAGGU |
| ENSG00000152268 | CUUUGGU |
| ENSG00000152268 | GAAAACA |
| ENSG00000152268 | UGUUGAA |
| ENSG00000152270 | AAAGUGC |
| ENSG00000152270 | AAGUGCA |
| ENSG00000152270 | ACAGUAU |
| ENSG00000152270 | AUGCACC |
| ENSG00000152270 | CACAGUG |
| ENSG00000152270 | GCAGCAU |
| ENSG00000152270 | UCACAGU |
| ENSG00000152270 | UCCUGAG |
| ENSG00000152270 | UGCAUAG |
| ENSG00000152284 | AACAGUC |
| ENSG00000152284 | AAUUUUA |
| ENSG00000152284 | ACACACC |
| ENSG00000152284 | ACACACU |
| ENSG00000152284 | AGGGUCU |
| ENSG00000152284 | CAGUCCA |
| ENSG00000152284 | CUGGGCA |
| ENSG00000152284 | GCAACUU |
| ENSG00000152284 | GUCCAGA |
| ENSG00000152284 | UCCAGAG |
| ENSG00000152284 | UCCUUU  |
| ENSG00000152284 | UUGUGAC |
| ENSG00000152291 | AAAGUGC |
| ENSG00000152291 | AAGUGCA |
| ENSG00000152291 | ACAAGGU |
| ENSG00000152291 | AGGGAGG |
| ENSG00000152291 | AGUGCAA |
| ENSG00000152291 | CAAAGUG |
| ENSG00000152291 | CACAGUG |
| ENSG00000152291 | CCAGCAU |
| ENSG00000152291 | CUUUGGU |
| ENSG00000152291 | GCAGGUU |
| ENSG00000152291 | GUGCAAA |
| ENSG00000152291 | UCCUGU  |
| ENSG00000152291 | UCCUUU  |
| ENSG00000152291 | UUGGUCC |
| ENSG00000152332 | AAAAAUC |
| ENSG00000152332 | ACUGCAG |
| ENSG00000152332 | CUACAGU |
| ENSG00000152332 | GGAAGAC |

|                 |          |
|-----------------|----------|
| ENSG00000152332 | GUGCAAA  |
| ENSG00000152348 | AUCCUUG  |
| ENSG00000152359 | AACAUUC  |
| ENSG00000152377 | AAGUCUU  |
| ENSG00000152377 | AGCCCUU  |
| ENSG00000152377 | AGCCUGC  |
| ENSG00000152377 | AUGGCUU  |
| ENSG00000152377 | CUGCAGG  |
| ENSG00000152377 | CUUCUCU  |
| ENSG00000152377 | GACCUGG  |
| ENSG00000152377 | GGAAGCC  |
| ENSG00000152377 | GUUAAUG  |
| ENSG00000152377 | UAAUGCU  |
| ENSG00000152377 | UACAGUU  |
| ENSG00000152377 | UGAGAAG  |
| ENSG00000152377 | UGAGAAU  |
| ENSG00000152377 | UGGUACC  |
| ENSG00000152377 | UUCCUAG  |
| ENSG00000152402 | CUGGGCA  |
| ENSG00000152402 | GAGUCUU  |
| ENSG00000152402 | GCCUGAU  |
| ENSG00000152402 | GUGCUUG  |
| ENSG00000152402 | UAUUGCU  |
| ENSG00000152402 | UUGAUCA  |
| ENSG00000152409 | AUUGCAC  |
| ENSG00000152409 | GGAAGAC  |
| ENSG00000152413 | AGCUGCC  |
| ENSG00000152413 | CACUCCU  |
| ENSG00000152413 | UCAAGUA  |
| ENSG00000152428 | AGGUAGU  |
| ENSG00000152430 | AGCUGCC  |
| ENSG00000152430 | AGCUUUAU |
| ENSG00000152430 | AGUAACA  |
| ENSG00000152430 | GAGCUGC  |
| ENSG00000152430 | GCUGGAU  |
| ENSG00000152430 | GGAAUGU  |
| ENSG00000152430 | UCACAAG  |
| ENSG00000152430 | UGAAGCU  |
| ENSG00000152455 | UGGCCAC  |
| ENSG00000152465 | AAAAACC  |
| ENSG00000152465 | AAAGUAC  |
| ENSG00000152465 | AACAGUC  |
| ENSG00000152465 | ACAUUCA  |
| ENSG00000152465 | AGCAAAA  |
| ENSG00000152465 | AGUAACA  |
| ENSG00000152465 | AUGAUGA  |
| ENSG00000152465 | AUGUGCC  |
| ENSG00000152465 | CAAAGUG  |
| ENSG00000152465 | CUCCAC   |
| ENSG00000152465 | CUUUGGU  |
| ENSG00000152465 | GAAGGAA  |
| ENSG00000152465 | GAGAAGA  |
| ENSG00000152465 | GCAGCAU  |
| ENSG00000152465 | GGAAUGU  |
| ENSG00000152465 | GGCAGUG  |
| ENSG00000152465 | GUGCAAA  |
| ENSG00000152465 | GUGCUUG  |
| ENSG00000152465 | UACAAAG  |
| ENSG00000152465 | UCUAGAG  |
| ENSG00000152465 | UUCAAAU  |
| ENSG00000152465 | UUGGCAA  |
| ENSG00000152465 | UUUGCAA  |
| ENSG00000152484 | GUGCAAA  |
| ENSG00000152495 | AUGCAUU  |

|                 |          |
|-----------------|----------|
| ENSG00000152495 | UGCAUUG  |
| ENSG00000152503 | AAAGCUG  |
| ENSG00000152503 | GUCUACU  |
| ENSG00000152518 | AGCUUUAU |
| ENSG00000152518 | GCUGGUG  |
| ENSG00000152518 | GGAAUGU  |
| ENSG00000152518 | GGUGGUU  |
| ENSG00000152518 | UCCAGAG  |
| ENSG00000152520 | AAAGAAU  |
| ENSG00000152520 | AAGGCAC  |
| ENSG00000152520 | AAGUCUU  |
| ENSG00000152520 | AAGUGCA  |
| ENSG00000152520 | AAUACUG  |
| ENSG00000152520 | AGUAACA  |
| ENSG00000152520 | CCAGUGU  |
| ENSG00000152520 | CUUCACC  |
| ENSG00000152520 | GGCGACA  |
| ENSG00000152520 | GUAACAG  |
| ENSG00000152520 | GUCUCUG  |
| ENSG00000152520 | GUGACUG  |
| ENSG00000152520 | GUGCUUG  |
| ENSG00000152520 | UAUAAAG  |
| ENSG00000152520 | UCACAGG  |
| ENSG00000152520 | UCACAGU  |
| ENSG00000152520 | UCCUGAG  |
| ENSG00000152520 | UGAAGUG  |
| ENSG00000152520 | UGUGCUU  |
| ENSG00000152520 | UUGGUCC  |
| ENSG00000152527 | AACAUUC  |
| ENSG00000152527 | AUGUGGG  |
| ENSG00000152527 | CAAAGCA  |
| ENSG00000152527 | CAAAGUG  |
| ENSG00000152527 | CAGCAA   |
| ENSG00000152527 | CAGGCUC  |
| ENSG00000152527 | UCACAGU  |
| ENSG00000152527 | UCACAUU  |
| ENSG00000152527 | UCAUGAU  |
| ENSG00000152527 | UGAAAGG  |
| ENSG00000152558 | AAAGUGC  |
| ENSG00000152558 | AAGACAU  |
| ENSG00000152558 | AAGUGCU  |
| ENSG00000152558 | AGCAGCU  |
| ENSG00000152558 | CACAGUG  |
| ENSG00000152558 | CCAGUGC  |
| ENSG00000152558 | CCAGUGU  |
| ENSG00000152558 | CCCUGAG  |
| ENSG00000152558 | GACCCUG  |
| ENSG00000152558 | UCACAGU  |
| ENSG00000152558 | UCCAGUU  |
| ENSG00000152558 | UUGGUCC  |
| ENSG00000152578 | AAAGAAU  |
| ENSG00000152578 | AAAUUUC  |
| ENSG00000152578 | AAGAACC  |
| ENSG00000152578 | AAUUAUU  |
| ENSG00000152578 | ACAAUUAU |
| ENSG00000152578 | AGCAAAA  |
| ENSG00000152578 | AGUGAUC  |
| ENSG00000152578 | AUUGCAC  |
| ENSG00000152578 | CAGUUAC  |
| ENSG00000152578 | CCGAGCC  |
| ENSG00000152578 | CUUACAG  |
| ENSG00000152578 | GAAGGUC  |
| ENSG00000152578 | GAAUUGU  |
| ENSG00000152578 | GCAGCAU  |

|                 |          |
|-----------------|----------|
| ENSG00000152578 | GGGUUUA  |
| ENSG00000152578 | GGUGGGC  |
| ENSG00000152578 | GUGCUUG  |
| ENSG00000152578 | GUUAAUG  |
| ENSG00000152578 | UACAGUU  |
| ENSG00000152578 | UAGUGAG  |
| ENSG00000152578 | UAUUACC  |
| ENSG00000152578 | UAUUGCU  |
| ENSG00000152578 | UCACAGG  |
| ENSG00000152578 | UGGGUAC  |
| ENSG00000152578 | UGUGCUU  |
| ENSG00000152578 | UUAUGCA  |
| ENSG00000152578 | UUGGUUC  |
| ENSG00000152578 | UUUUUGC  |
| ENSG00000152592 | GAGGUAG  |
| ENSG00000152592 | GAGGUAU  |
| ENSG00000152592 | UACAAAG  |
| ENSG00000152592 | UAUUACC  |
| ENSG00000152601 | AAAGUAA  |
| ENSG00000152601 | AACAAAC  |
| ENSG00000152601 | AACAUUC  |
| ENSG00000152601 | AACUCUA  |
| ENSG00000152601 | AAGGUGC  |
| ENSG00000152601 | AAGUCAC  |
| ENSG00000152601 | AAUUAUU  |
| ENSG00000152601 | ACAUUCA  |
| ENSG00000152601 | ACCCGUA  |
| ENSG00000152601 | ACUCAAA  |
| ENSG00000152601 | AGAUGUG  |
| ENSG00000152601 | AGCUUUAU |
| ENSG00000152601 | AUCCUUU  |
| ENSG00000152601 | AUGUAAU  |
| ENSG00000152601 | CAAGAGC  |
| ENSG00000152601 | CAGUAGA  |
| ENSG00000152601 | CUUACAG  |
| ENSG00000152601 | CUUUGGU  |
| ENSG00000152601 | GAAGGAA  |
| ENSG00000152601 | GACCUGG  |
| ENSG00000152601 | GCCUGAU  |
| ENSG00000152601 | GGAGUGU  |
| ENSG00000152601 | GGUCUAG  |
| ENSG00000152601 | GUAAACA  |
| ENSG00000152601 | GUCAGUU  |
| ENSG00000152601 | GUCUGCC  |
| ENSG00000152601 | GUGCAAA  |
| ENSG00000152601 | GUGCUUG  |
| ENSG00000152601 | UAAUAUC  |
| ENSG00000152601 | UAUAAUA  |
| ENSG00000152601 | UCAUGAU  |
| ENSG00000152601 | UCCCUUG  |
| ENSG00000152601 | UCCCUUU  |
| ENSG00000152601 | UCUCAAG  |
| ENSG00000152601 | UGAGAAU  |
| ENSG00000152601 | UGAUCCA  |
| ENSG00000152601 | UGUCUGC  |
| ENSG00000152601 | UGUCUGG  |
| ENSG00000152601 | UUAUGCA  |
| ENSG00000152601 | UUCUAAU  |
| ENSG00000152601 | UUGGCAC  |
| ENSG00000152601 | UUGUUCG  |
| ENSG00000152620 | AAAGAAU  |
| ENSG00000152620 | AUAAAGU  |
| ENSG00000152620 | UAUAAAG  |
| ENSG00000152642 | ACAGGUG  |

|                 |         |
|-----------------|---------|
| ENSG00000152642 | AGCCCUU |
| ENSG00000152642 | AGUGGUU |
| ENSG00000152642 | CAGCAGA |
| ENSG00000152642 | GGUGGUU |
| ENSG00000152642 | GUGCUUG |
| ENSG00000152642 | UAAUGCU |
| ENSG00000152642 | UCACAGG |
| ENSG00000152642 | UCACAGU |
| ENSG00000152642 | UGUGCUU |
| ENSG00000152661 | AACUGGU |
| ENSG00000152661 | ACAGUAU |
| ENSG00000152661 | GUAAACA |
| ENSG00000152661 | UACAGUU |
| ENSG00000152661 | UUCAAGC |
| ENSG00000152683 | CUACAAA |
| ENSG00000152683 | UCAUGAU |
| ENSG00000152683 | UGCAAAG |
| ENSG00000152700 | AUGAUGA |
| ENSG00000152749 | AACAAAC |
| ENSG00000152749 | AAUUAUU |
| ENSG00000152749 | AUCCUUG |
| ENSG00000152749 | AUCCUUU |
| ENSG00000152749 | CAUGGGU |
| ENSG00000152749 | CCAGUGC |
| ENSG00000152749 | CCAGUGU |
| ENSG00000152749 | CUUGGGC |
| ENSG00000152749 | GUUAAUG |
| ENSG00000152749 | UAUUGCU |
| ENSG00000152749 | UGAAAUG |
| ENSG00000152749 | UUUCAAC |
| ENSG00000152760 | AAAGUGC |
| ENSG00000152760 | AAGUGCA |
| ENSG00000152760 | AAUUGCU |
| ENSG00000152760 | CAAGAGC |
| ENSG00000152760 | CUGCUCU |
| ENSG00000152760 | GCCUGU  |
| ENSG00000152760 | UGAAAGG |
| ENSG00000152760 | UGACCUA |
| ENSG00000152763 | UUCUAAU |
| ENSG00000152766 | ACUGGCU |
| ENSG00000152766 | CUGGGGG |
| ENSG00000152766 | GGAUUUU |
| ENSG00000152767 | AAAAGUA |
| ENSG00000152767 | AAGGCAC |
| ENSG00000152767 | ACUGGCC |
| ENSG00000152767 | ACUGGCU |
| ENSG00000152767 | AGCAAAA |
| ENSG00000152767 | GAGGUAG |
| ENSG00000152767 | GUGAGGU |
| ENSG00000152767 | UCAUUUG |
| ENSG00000152767 | UCCUGU  |
| ENSG00000152767 | UCCUUG  |
| ENSG00000152767 | UUGCAA  |
| ENSG00000152767 | UUGGUCC |
| ENSG00000152778 | AAAACUG |
| ENSG00000152778 | UUCUAG  |
| ENSG00000152779 | AAAGUGC |
| ENSG00000152779 | AAGUGCU |
| ENSG00000152779 | CCUGCUG |
| ENSG00000152779 | GAAAACA |
| ENSG00000152779 | GAGACCU |
| ENSG00000152782 | ACGUCAU |
| ENSG00000152782 | AGCAGCA |
| ENSG00000152782 | AUGGCUU |

|                 |          |
|-----------------|----------|
| ENSG00000152782 | CAAAACU  |
| ENSG00000152782 | CACAGUG  |
| ENSG00000152782 | CAGCAA   |
| ENSG00000152782 | CAGCAGG  |
| ENSG00000152782 | GAUCAGA  |
| ENSG00000152782 | GGAUUUU  |
| ENSG00000152782 | UCACAGG  |
| ENSG00000152784 | CAA AUGC |
| ENSG00000152784 | CGUGCAU  |
| ENSG00000152784 | UAUAAAAG |
| ENSG00000152784 | UAUAUGA  |
| ENSG00000152785 | AAAGCUG  |
| ENSG00000152785 | AAGGCAC  |
| ENSG00000152785 | AGCUUAU  |
| ENSG00000152785 | AUGCAUU  |
| ENSG00000152785 | CACAGUG  |
| ENSG00000152785 | UCACAGG  |
| ENSG00000152785 | UCCUGAG  |
| ENSG00000152795 | AAAAACC  |
| ENSG00000152795 | AAGUCUU  |
| ENSG00000152795 | GUCAACA  |
| ENSG00000152795 | UACAGUU  |
| ENSG00000152795 | UCUCCAA  |
| ENSG00000152795 | UGUAUAA  |
| ENSG00000152804 | CAGUGCA  |
| ENSG00000152804 | CUACAAA  |
| ENSG00000152804 | GUCAGUU  |
| ENSG00000152818 | AUACAAG  |
| ENSG00000152818 | GAGGUAU  |
| ENSG00000152822 | ACAUUAC  |
| ENSG00000152822 | ACAUUCA  |
| ENSG00000152822 | ACUGCAG  |
| ENSG00000152822 | AUACAAG  |
| ENSG00000152822 | CUACAGU  |
| ENSG00000152822 | GUGCUUG  |
| ENSG00000152822 | UUGACAC  |
| ENSG00000152822 | UUGGCAC  |
| ENSG00000152894 | AUUGCAC  |
| ENSG00000152894 | CUUUGGU  |
| ENSG00000152894 | GUGCUUG  |
| ENSG00000152894 | UGAUCCA  |
| ENSG00000152894 | UGUGCUU  |
| ENSG00000152904 | AAAAAUC  |
| ENSG00000152904 | UGGAUAA  |
| ENSG00000152936 | UUGUGAC  |
| ENSG00000152944 | CAAGAGC  |
| ENSG00000152952 | UUGGCAA  |
| ENSG00000152953 | ACUCAGC  |
| ENSG00000152953 | GAGGGGC  |
| ENSG00000152954 | AAAAAUC  |
| ENSG00000152954 | AAGUGCA  |
| ENSG00000152954 | AGCACCA  |
| ENSG00000152954 | AGUGCAA  |
| ENSG00000152954 | AUGGCUU  |
| ENSG00000152969 | AAGGCAC  |
| ENSG00000152969 | AUUGCAC  |
| ENSG00000152969 | UGCAAAG  |
| ENSG00000152977 | AAACUGU  |
| ENSG00000152977 | AAAGUGC  |
| ENSG00000152977 | AAAUUUC  |
| ENSG00000152977 | ACUAGAU  |
| ENSG00000152977 | ACUGCAG  |
| ENSG00000152977 | ACUGCAU  |
| ENSG00000152977 | ACUGUAG  |



|                 |          |
|-----------------|----------|
| ENSG00000152977 | AUACAAG  |
| ENSG00000152977 | AUAU AAC |
| ENSG00000152977 | AUCACUA  |
| ENSG00000152977 | CAGCAGG  |
| ENSG00000152977 | CUACAGU  |
| ENSG00000152977 | CUGGAAA  |
| ENSG00000152977 | GCAGGUU  |
| ENSG00000152977 | GGUUGUC  |
| ENSG00000152977 | GUAACAG  |
| ENSG00000152977 | GUCUGCC  |
| ENSG00000152977 | UAAUACA  |
| ENSG00000152977 | UAGACUG  |
| ENSG00000152977 | UCAUUUG  |
| ENSG00000152977 | UCUUGAG  |
| ENSG00000152977 | UGCAAAG  |
| ENSG00000152977 | UGGGACA  |
| ENSG00000152977 | UGGUACC  |
| ENSG00000152977 | UGUCUGC  |
| ENSG00000152977 | UUAGAGA  |
| ENSG00000152977 | UUGACAC  |
| ENSG00000152977 | UUUGCAC  |
| ENSG00000152990 | GGAAUGU  |
| ENSG00000153006 | AAAAGUA  |
| ENSG00000153006 | AAAGCUG  |
| ENSG00000153006 | AAGGCAC  |
| ENSG00000153006 | AAUUGCU  |
| ENSG00000153006 | AUCACUA  |
| ENSG00000153006 | CAAAGCA  |
| ENSG00000153006 | CCAGGAG  |
| ENSG00000153006 | CCCUGAG  |
| ENSG00000153006 | CUUCUCU  |
| ENSG00000153006 | CUUUGGU  |
| ENSG00000153006 | UCACAGU  |
| ENSG00000153006 | UUGAGGC  |
| ENSG00000153012 | AAAAGUA  |
| ENSG00000153012 | AGCACCA  |
| ENSG00000153012 | CAAAGCA  |
| ENSG00000153012 | CCCUGAG  |
| ENSG00000153012 | GUCCAGA  |
| ENSG00000153046 | AACUACU  |
| ENSG00000153046 | ACUGUAG  |
| ENSG00000153046 | AGUGGUU  |
| ENSG00000153046 | GAGGUAG  |
| ENSG00000153046 | GAGGUAU  |
| ENSG00000153046 | GAUUGUA  |
| ENSG00000153046 | UCACAGG  |
| ENSG00000153046 | UCACAGU  |
| ENSG00000153046 | UCCCACA  |
| ENSG00000153046 | UCUCACC  |
| ENSG00000153048 | AAGGCAC  |
| ENSG00000153048 | ACUCAGC  |
| ENSG00000153064 | UAUAAUA  |
| ENSG00000153071 | AAAGUGC  |
| ENSG00000153071 | AAGAACC  |
| ENSG00000153071 | AAGUGCA  |
| ENSG00000153071 | GAGUUGA  |
| ENSG00000153094 | AAAGUGC  |
| ENSG00000153094 | AAGGCAC  |
| ENSG00000153094 | AAGUGCU  |
| ENSG00000153094 | ACAGUAC  |
| ENSG00000153094 | ACAGUAU  |
| ENSG00000153094 | ACUGCAG  |
| ENSG00000153094 | AGUGAUC  |
| ENSG00000153094 | AGUGCAA  |

|                 |          |
|-----------------|----------|
| ENSG00000153094 | AUACAAG  |
| ENSG00000153094 | CAGCAGA  |
| ENSG00000153094 | CUGCAGC  |
| ENSG00000153094 | GAAACAU  |
| ENSG00000153094 | UAGUGAG  |
| ENSG00000153094 | UAUUGCU  |
| ENSG00000153094 | UCAUAGA  |
| ENSG00000153094 | UUCCAUA  |
| ENSG00000153107 | UACAAAG  |
| ENSG00000153113 | AAAGAAU  |
| ENSG00000153113 | AAAGUUU  |
| ENSG00000153113 | AAGUCAC  |
| ENSG00000153113 | ACAGGUG  |
| ENSG00000153113 | ACUGUGU  |
| ENSG00000153113 | AUAAAGU  |
| ENSG00000153113 | CACCAGC  |
| ENSG00000153113 | CAGGUGA  |
| ENSG00000153113 | CUUACAG  |
| ENSG00000153113 | UACAAAG  |
| ENSG00000153113 | UGCAAAG  |
| ENSG00000153130 | AUAAAGU  |
| ENSG00000153130 | UCACAAG  |
| ENSG00000153130 | UUGGUCC  |
| ENSG00000153130 | UUUGCAA  |
| ENSG00000153132 | AUUGCAC  |
| ENSG00000153132 | UAUUGCU  |
| ENSG00000153132 | UGCAUUG  |
| ENSG00000153147 | GUAAACA  |
| ENSG00000153162 | UACAAAG  |
| ENSG00000153162 | UUCUAAU  |
| ENSG00000153179 | AGGUAGU  |
| ENSG00000153187 | AAAUGGU  |
| ENSG00000153187 | AACAAAC  |
| ENSG00000153187 | AACAGUC  |
| ENSG00000153187 | AACAUUC  |
| ENSG00000153187 | AAUACUG  |
| ENSG00000153187 | ACACACU  |
| ENSG00000153187 | ACAGUAC  |
| ENSG00000153187 | ACUGGAU  |
| ENSG00000153187 | ACUGGCU  |
| ENSG00000153187 | AGCCAGU  |
| ENSG00000153187 | AGCCCUU  |
| ENSG00000153187 | AGCUUUAU |
| ENSG00000153187 | AUGAGCU  |
| ENSG00000153187 | AUGGCUU  |
| ENSG00000153187 | AUUGCAC  |
| ENSG00000153187 | CACAAUG  |
| ENSG00000153187 | CAGCAGA  |
| ENSG00000153187 | CAGCAGG  |
| ENSG00000153187 | CCAGUAC  |
| ENSG00000153187 | CGUGCAU  |
| ENSG00000153187 | CUACAGU  |
| ENSG00000153187 | CUCCAA   |
| ENSG00000153187 | CUCCAC   |
| ENSG00000153187 | CUGGGGG  |
| ENSG00000153187 | CUUGGGC  |
| ENSG00000153187 | CUUGUGU  |
| ENSG00000153187 | GAAGGUC  |
| ENSG00000153187 | GAGAAAU  |
| ENSG00000153187 | GAGUCUU  |
| ENSG00000153187 | GCAGAAG  |
| ENSG00000153187 | GGAUUUC  |
| ENSG00000153187 | GGAUUUU  |
| ENSG00000153187 | GUGACAG  |

|                 |         |
|-----------------|---------|
| ENSG00000153187 | GUGCAA  |
| ENSG00000153187 | UACAGUU |
| ENSG00000153187 | UAUAAAG |
| ENSG00000153187 | UAUUGCU |
| ENSG00000153187 | UCGUGCA |
| ENSG00000153187 | UCUCCAA |
| ENSG00000153187 | UGCAAAG |
| ENSG00000153187 | UGGAGAU |
| ENSG00000153187 | UGGGUAC |
| ENSG00000153187 | UGGGUGA |
| ENSG00000153187 | UUCUUGU |
| ENSG00000153187 | UUGGAGG |
| ENSG00000153201 | AAAGGUA |
| ENSG00000153201 | ACCCAUI |
| ENSG00000153201 | ACUGCAG |
| ENSG00000153201 | ACUGCAU |
| ENSG00000153201 | AGGUAGU |
| ENSG00000153201 | AGUAGAC |
| ENSG00000153201 | AUAAAGU |
| ENSG00000153201 | CACAAUG |
| ENSG00000153201 | CACACCG |
| ENSG00000153201 | CACACCU |
| ENSG00000153201 | CAUAUUG |
| ENSG00000153201 | CUACAAA |
| ENSG00000153201 | GACAACU |
| ENSG00000153201 | GAGGUAU |
| ENSG00000153201 | GCUACAU |
| ENSG00000153201 | UAAUACA |
| ENSG00000153201 | UAUAAAG |
| ENSG00000153201 | UAUUGCU |
| ENSG00000153201 | UCACACA |
| ENSG00000153201 | UCCCUUU |
| ENSG00000153201 | UGCAUAG |
| ENSG00000153201 | UUGGUUC |
| ENSG00000153201 | UUUCAAC |
| ENSG00000153207 | AACCUGU |
| ENSG00000153207 | AAGUCUU |
| ENSG00000153207 | ACAAUAU |
| ENSG00000153207 | ACCUGGA |
| ENSG00000153207 | GUGCCUG |
| ENSG00000153207 | UAAUAUC |
| ENSG00000153207 | UCACACA |
| ENSG00000153214 | AGCAGCA |
| ENSG00000153233 | UGUGCUU |
| ENSG00000153234 | AAAGUUU |
| ENSG00000153234 | AACAGUC |
| ENSG00000153234 | AACUACU |
| ENSG00000153234 | AAGUGCU |
| ENSG00000153234 | AAUGUUG |
| ENSG00000153234 | AAUUUUA |
| ENSG00000153234 | ACAUAGA |
| ENSG00000153234 | AGUGCCU |
| ENSG00000153234 | AUGGCAC |
| ENSG00000153234 | CCCACCU |
| ENSG00000153234 | GAGAAAU |
| ENSG00000153234 | GGAAUGU |
| ENSG00000153234 | GGACGGA |
| ENSG00000153234 | GGCAGUG |
| ENSG00000153234 | UAUAAAG |
| ENSG00000153234 | UAUAAUA |
| ENSG00000153234 | UCUGGAA |
| ENSG00000153250 | AAAACUG |
| ENSG00000153250 | AAACUGU |
| ENSG00000153250 | AACACUG |

|                 |         |
|-----------------|---------|
| ENSG00000153250 | AAGACAU |
| ENSG00000153250 | AAGGCAC |
| ENSG00000153250 | ACAAGGU |
| ENSG00000153250 | CAAAACU |
| ENSG00000153250 | CAGCAA  |
| ENSG00000153250 | GAUUGUA |
| ENSG00000153250 | GAUUGUC |
| ENSG00000153250 | UAUAAAG |
| ENSG00000153250 | UUGAUCA |
| ENSG00000153253 | ACCACAG |
| ENSG00000153253 | GUCAGUU |
| ENSG00000153253 | UACAAAG |
| ENSG00000153253 | UGCAUAG |
| ENSG00000153253 | UGCAUUA |
| ENSG00000153253 | UUGGCAA |
| ENSG00000153253 | UUGGCAC |
| ENSG00000153283 | AUUCAUU |
| ENSG00000153291 | AAAGAGC |
| ENSG00000153291 | AAGUGCU |
| ENSG00000153291 | AGUGCUG |
| ENSG00000153291 | CUGCCCC |
| ENSG00000153291 | GAGGUAG |
| ENSG00000153310 | AAAGCUG |
| ENSG00000153310 | AAGUCAC |
| ENSG00000153310 | AAUACUG |
| ENSG00000153310 | ACAUCAC |
| ENSG00000153310 | ACGCACU |
| ENSG00000153310 | AUCACUA |
| ENSG00000153310 | CAGCAGG |
| ENSG00000153310 | GCAGAAG |
| ENSG00000153310 | UACAAAG |
| ENSG00000153310 | UCAAGUA |
| ENSG00000153310 | UUGGCAA |
| ENSG00000153339 | AAAAAUC |
| ENSG00000153339 | AAAGUAU |
| ENSG00000153339 | AACACUG |
| ENSG00000153339 | AAGUUGU |
| ENSG00000153339 | AAUUUUU |
| ENSG00000153339 | ACAGUAC |
| ENSG00000153339 | AUGGCUU |
| ENSG00000153339 | CACAGUG |
| ENSG00000153339 | CAGCAGA |
| ENSG00000153339 | CUAUACA |
| ENSG00000153339 | UACAGUU |
| ENSG00000153339 | UAUAAAG |
| ENSG00000153339 | UCACAGG |
| ENSG00000153339 | UGUAUAA |
| ENSG00000153339 | UUCAAAU |
| ENSG00000153339 | UUUGCAA |
| ENSG00000153339 | UUUGCAC |
| ENSG00000153395 | CACAGUG |
| ENSG00000153395 | UCACAGG |
| ENSG00000153395 | UGUGCUU |
| ENSG00000153443 | AGCUGCC |
| ENSG00000153443 | GGGGUGC |
| ENSG00000153485 | AAUUUUA |
| ENSG00000153487 | AAGUGCA |
| ENSG00000153487 | AGUGCAA |
| ENSG00000153531 | AGUGUGC |
| ENSG00000153531 | CACACCG |
| ENSG00000153531 | CACACCU |
| ENSG00000153531 | UCACACA |
| ENSG00000153551 | UUGGCAA |
| ENSG00000153558 | CUUUGGU |

|                 |         |
|-----------------|---------|
| ENSG00000153558 | GACCCUG |
| ENSG00000153558 | UGUGCUU |
| ENSG00000153558 | UUGGUCC |
| ENSG00000153560 | AAAGGUA |
| ENSG00000153560 | AAUGCCC |
| ENSG00000153560 | ACACACU |
| ENSG00000153560 | ACUGGCU |
| ENSG00000153560 | CAGUCUG |
| ENSG00000153560 | CUUCACC |
| ENSG00000153560 | CUUGGAG |
| ENSG00000153560 | GAUUGUA |
| ENSG00000153560 | UGAAAUG |
| ENSG00000153560 | UUAGGAU |
| ENSG00000153561 | AAAGUUU |
| ENSG00000153561 | AAUUAUU |
| ENSG00000153561 | ACUGCAU |
| ENSG00000153561 | AUGCACC |
| ENSG00000153561 | CAGUGCA |
| ENSG00000153561 | CUCACAC |
| ENSG00000153561 | UACAAAG |
| ENSG00000153561 | UGAAAUG |
| ENSG00000153561 | UGCAUUG |
| ENSG00000153561 | UUCUGCA |
| ENSG00000153561 | UUGAUCA |
| ENSG00000153574 | AAGGCAC |
| ENSG00000153574 | UUUUUGC |
| ENSG00000153575 | AAUUUUA |
| ENSG00000153707 | AAAGAGC |
| ENSG00000153707 | AAAGGUA |
| ENSG00000153707 | AACAUUC |
| ENSG00000153707 | AAGGCAC |
| ENSG00000153707 | AAGUGCA |
| ENSG00000153707 | AAGUGCU |
| ENSG00000153707 | AGCACCA |
| ENSG00000153707 | AGUGCAA |
| ENSG00000153707 | AGUGCUU |
| ENSG00000153707 | AUAUUAU |
| ENSG00000153707 | AUGCAUU |
| ENSG00000153707 | AUGGCUU |
| ENSG00000153707 | CACACCU |
| ENSG00000153707 | CAGCAGA |
| ENSG00000153707 | CAGCAGG |
| ENSG00000153707 | CAGUCUG |
| ENSG00000153707 | CAGUGCA |
| ENSG00000153707 | CCCCUGG |
| ENSG00000153707 | CCCUGUC |
| ENSG00000153707 | CCUUCUG |
| ENSG00000153707 | CUGUUGA |
| ENSG00000153707 | CUUCUCU |
| ENSG00000153707 | GAGGUAG |
| ENSG00000153707 | GGAAGCC |
| ENSG00000153707 | GGAUUUC |
| ENSG00000153707 | GGCAGUG |
| ENSG00000153707 | GGGUGUU |
| ENSG00000153707 | GUGUCAC |
| ENSG00000153707 | UAUUGCU |
| ENSG00000153707 | UCCCACA |
| ENSG00000153707 | UCCCUGU |
| ENSG00000153707 | UGCAUAG |
| ENSG00000153707 | UGGAUAA |
| ENSG00000153707 | UGGGUGA |
| ENSG00000153707 | UUGGUCC |
| ENSG00000153714 | AGCAGCU |
| ENSG00000153714 | AUUGCAC |

|                 |         |
|-----------------|---------|
| ENSG00000153714 | CCCUGAG |
| ENSG00000153714 | GGUUUAC |
| ENSG00000153721 | AACAAAC |
| ENSG00000153721 | AAGGCAC |
| ENSG00000153721 | AUACAAG |
| ENSG00000153767 | AAAGUUU |
| ENSG00000153767 | ACAAGGU |
| ENSG00000153767 | UAAUACA |
| ENSG00000153767 | UAUCAGA |
| ENSG00000153774 | UCACAUU |
| ENSG00000153786 | AAGGCAC |
| ENSG00000153786 | ACAUUCA |
| ENSG00000153786 | AGUGCAA |
| ENSG00000153786 | AUGUAAU |
| ENSG00000153786 | CCCUGAG |
| ENSG00000153786 | CUUUGGU |
| ENSG00000153786 | GGGAGCU |
| ENSG00000153786 | UCCCUGU |
| ENSG00000153786 | UUUGCAA |
| ENSG00000153789 | CCCUGAG |
| ENSG00000153790 | AUCCUUU |
| ENSG00000153790 | GAGGCUG |
| ENSG00000153790 | UUCUUGU |
| ENSG00000153814 | AAAGUGC |
| ENSG00000153814 | AACAUUC |
| ENSG00000153814 | AAGGCAC |
| ENSG00000153814 | AAGUGCU |
| ENSG00000153814 | AGCACCA |
| ENSG00000153814 | AGGGUUG |
| ENSG00000153814 | AGUGCUU |
| ENSG00000153814 | AUAUUAU |
| ENSG00000153814 | CUAUACA |
| ENSG00000153814 | GAGAACU |
| ENSG00000153814 | UCACAUU |
| ENSG00000153814 | UUGGCAC |
| ENSG00000153820 | UUUCAAC |
| ENSG00000153823 | AAGGCAC |
| ENSG00000153823 | AUGCAUU |
| ENSG00000153823 | GGCAGUG |
| ENSG00000153823 | GUGAAUG |
| ENSG00000153823 | UUAUGCA |
| ENSG00000153823 | UUGGCAA |
| ENSG00000153823 | UUGGCAC |
| ENSG00000153827 | AUCCCUU |
| ENSG00000153827 | CAAAGCA |
| ENSG00000153827 | CAGCAA  |
| ENSG00000153827 | GCCUGAU |
| ENSG00000153879 | AAGGCAC |
| ENSG00000153879 | AAUCUCA |
| ENSG00000153879 | CACACCG |
| ENSG00000153879 | CAGGAAC |
| ENSG00000153879 | CAGUGCA |
| ENSG00000153879 | CUCACAC |
| ENSG00000153879 | GAGGCAG |
| ENSG00000153879 | UCAAGUA |
| ENSG00000153885 | AAUACUG |
| ENSG00000153885 | ACUGUUU |
| ENSG00000153885 | AGAUAAA |
| ENSG00000153885 | AGCACCA |
| ENSG00000153885 | AUGGCAC |
| ENSG00000153885 | CCUGCUG |
| ENSG00000153885 | CUACAGU |
| ENSG00000153885 | CUAGUCC |
| ENSG00000153885 | CUCGCUG |

|                 |         |
|-----------------|---------|
| ENSG00000153885 | CUCUGGG |
| ENSG00000153885 | CUGGGCA |
| ENSG00000153885 | GAGAACU |
| ENSG00000153885 | GGAAGCC |
| ENSG00000153885 | GGACCUG |
| ENSG00000153885 | GGAGGAG |
| ENSG00000153885 | GGAGUCC |
| ENSG00000153885 | GGCUGCG |
| ENSG00000153885 | GGGGUGG |
| ENSG00000153885 | GGUGGGC |
| ENSG00000153885 | UCCUGAG |
| ENSG00000153885 | UCUGGAA |
| ENSG00000153885 | UGCUGAC |
| ENSG00000153885 | UUGGUCC |
| ENSG00000153898 | AAAUUUC |
| ENSG00000153902 | CAGCAGA |
| ENSG00000153904 | AAAGUAC |
| ENSG00000153904 | ACAGUAC |
| ENSG00000153904 | CACAGUG |
| ENSG00000153904 | CAGUAGA |
| ENSG00000153904 | GAUUGUC |
| ENSG00000153904 | GCAACUU |
| ENSG00000153904 | GCAGAAG |
| ENSG00000153904 | UGGAGAU |
| ENSG00000153904 | UUGGCAA |
| ENSG00000153914 | AGCAGCU |
| ENSG00000153914 | AUGCAUU |
| ENSG00000153914 | CUAUACA |
| ENSG00000153914 | GAGGUAG |
| ENSG00000153914 | GAGGUAU |
| ENSG00000153914 | GAUUGUC |
| ENSG00000153914 | GGAUUUC |
| ENSG00000153914 | GGAUUUU |
| ENSG00000153914 | UAUCAGA |
| ENSG00000153914 | UGUGCUU |
| ENSG00000153922 | AAGGCAC |
| ENSG00000153922 | AAUACUG |
| ENSG00000153922 | ACAUUCA |
| ENSG00000153922 | AGUAACA |
| ENSG00000153922 | AUGGCUU |
| ENSG00000153922 | CAGUGCA |
| ENSG00000153922 | CUGGAAA |
| ENSG00000153922 | GAAACAU |
| ENSG00000153922 | GGCAGUG |
| ENSG00000153922 | GGCUGCG |
| ENSG00000153922 | UAUUGCU |
| ENSG00000153922 | UCAAGUA |
| ENSG00000153922 | UGACAUC |
| ENSG00000153922 | UGCAUAG |
| ENSG00000153922 | UGGCUGC |
| ENSG00000153922 | UUGACAC |
| ENSG00000153936 | AAAGCUG |
| ENSG00000153936 | AAAUGGU |
| ENSG00000153936 | AAGGCAC |
| ENSG00000153936 | AAUACUG |
| ENSG00000153936 | ACAGGUG |
| ENSG00000153936 | ACAUUCA |
| ENSG00000153936 | ACCACAG |
| ENSG00000153936 | AGAUGUG |
| ENSG00000153936 | AUGCAUU |
| ENSG00000153936 | CAAAGUG |
| ENSG00000153936 | CACACCU |
| ENSG00000153936 | CAGCAGG |
| ENSG00000153936 | CAGUAGA |

|                 |         |
|-----------------|---------|
| ENSG00000153936 | CUACAGU |
| ENSG00000153936 | GAGGUAG |
| ENSG00000153936 | GAGGUAU |
| ENSG00000153936 | GGAGUCC |
| ENSG00000153936 | GGCAGUG |
| ENSG00000153936 | GUGACAG |
| ENSG00000153936 | GUGAGGU |
| ENSG00000153936 | GUGCAAA |
| ENSG00000153936 | UACAAAG |
| ENSG00000153936 | UCAAGUA |
| ENSG00000153936 | UCACAGG |
| ENSG00000153936 | UCCACA  |
| ENSG00000153936 | UCCACC  |
| ENSG00000153936 | UCUCAA  |
| ENSG00000153936 | UGCUCAC |
| ENSG00000153936 | UGUUGAA |
| ENSG00000153936 | UUCAAGC |
| ENSG00000153944 | AUGCCUU |
| ENSG00000153944 | CUCACAC |
| ENSG00000153944 | CUUACAG |
| ENSG00000153944 | GAGAAGA |
| ENSG00000153944 | GUAAACA |
| ENSG00000153944 | UCACAAG |
| ENSG00000153944 | UCACCAC |
| ENSG00000153944 | UCAUAGA |
| ENSG00000153944 | UCUCACC |
| ENSG00000153944 | UGAGAAG |
| ENSG00000153944 | UUGUGAC |
| ENSG00000153956 | AGCAUUC |
| ENSG00000153956 | AUGAUGC |
| ENSG00000153982 | AAAAAUC |
| ENSG00000153982 | ACAUUCA |
| ENSG00000153982 | ACUGCAU |
| ENSG00000153982 | AUGGCUU |
| ENSG00000153982 | GAGGUAG |
| ENSG00000153982 | GAGGUAU |
| ENSG00000153982 | UACAAAG |
| ENSG00000153982 | UCUGGAG |
| ENSG00000153989 | AAAAACC |
| ENSG00000153989 | AAAGAAU |
| ENSG00000153989 | AAAGUAA |
| ENSG00000153989 | AGUGCAA |
| ENSG00000153989 | AUGCACC |
| ENSG00000153989 | CACUGUU |
| ENSG00000153989 | CCAGUGC |
| ENSG00000153989 | GUGCAAA |
| ENSG00000153989 | UGCAAAG |
| ENSG00000153989 | UGUUGAA |
| ENSG00000153989 | UUCAAGC |
| ENSG00000153989 | UUGGCAA |
| ENSG00000153989 | UUGGUCC |
| ENSG00000153993 | GAGAAAU |
| ENSG00000153993 | GUGAGGU |
| ENSG00000153993 | UCACACA |
| ENSG00000154001 | AAAGUAA |
| ENSG00000154001 | AAAGUUU |
| ENSG00000154001 | AACAGUC |
| ENSG00000154001 | AAUCCUU |
| ENSG00000154001 | ACAGUAC |
| ENSG00000154001 | ACAGUAU |
| ENSG00000154001 | ACAUUCA |
| ENSG00000154001 | ACUCAGC |
| ENSG00000154001 | ACUGUAG |
| ENSG00000154001 | AGAUGUG |



|                 |         |
|-----------------|---------|
| ENSG00000154001 | AGCAUUC |
| ENSG00000154001 | AGUAGUU |
| ENSG00000154001 | AGUGCUG |
| ENSG00000154001 | AUCCUUU |
| ENSG00000154001 | AUGCACC |
| ENSG00000154001 | CAGUAGA |
| ENSG00000154001 | GAAACAU |
| ENSG00000154001 | GUUAGGA |
| ENSG00000154001 | UAAUACA |
| ENSG00000154001 | UGAAGUG |
| ENSG00000154001 | UGAGAAG |
| ENSG00000154001 | UUAGAGA |
| ENSG00000154001 | UUGGUCC |
| ENSG00000154027 | UCCAGAG |
| ENSG00000154059 | AAGGCAC |
| ENSG00000154059 | GAAACAU |
| ENSG00000154059 | GGAUUUU |
| ENSG00000154059 | UCUAGAG |
| ENSG00000154059 | UGAAAGG |
| ENSG00000154059 | UUCAAAU |
| ENSG00000154096 | GCAGCAU |
| ENSG00000154096 | UCCAGAG |
| ENSG00000154096 | UCUGGAA |
| ENSG00000154118 | AAAAAUC |
| ENSG00000154118 | AAACUGU |
| ENSG00000154118 | AAAGGUA |
| ENSG00000154118 | ACAUUAC |
| ENSG00000154118 | ACUUGGA |
| ENSG00000154118 | AGGCAGG |
| ENSG00000154118 | AUGCAUU |
| ENSG00000154118 | CAAAGCA |
| ENSG00000154118 | CAGUGCA |
| ENSG00000154118 | CCAGUGU |
| ENSG00000154118 | GGCAGUG |
| ENSG00000154118 | UCCCUUG |
| ENSG00000154118 | UGCAUAU |
| ENSG00000154118 | UUCAAGC |
| ENSG00000154118 | UUUUUGC |
| ENSG00000154122 | AAAGUAC |
| ENSG00000154122 | AAAGUAU |
| ENSG00000154122 | AAUACUG |
| ENSG00000154122 | ACUGCAG |
| ENSG00000154122 | ACUGCAU |
| ENSG00000154122 | CAAACU  |
| ENSG00000154122 | CCUGAG  |
| ENSG00000154122 | CCUGCUG |
| ENSG00000154122 | CUUUGGU |
| ENSG00000154122 | GAUUGUC |
| ENSG00000154122 | GGAUUUC |
| ENSG00000154122 | GGAUUUU |
| ENSG00000154122 | GGCAUUG |
| ENSG00000154122 | UAUAAAG |
| ENSG00000154124 | AACAGUC |
| ENSG00000154124 | AGCCAGU |
| ENSG00000154124 | CAGUCUG |
| ENSG00000154124 | CUGGGCA |
| ENSG00000154124 | UACAGUU |
| ENSG00000154124 | UCACAGG |
| ENSG00000154124 | UGUGCUU |
| ENSG00000154127 | AAAGAGG |
| ENSG00000154127 | AAAGUAA |
| ENSG00000154127 | AAAGUAC |
| ENSG00000154127 | ACAAUAU |
| ENSG00000154127 | AUUGCAC |

|                 |         |
|-----------------|---------|
| ENSG00000154127 | CAUAUUG |
| ENSG00000154127 | CCCUGAG |
| ENSG00000154127 | CUCACAC |
| ENSG00000154127 | GCCUGGG |
| ENSG00000154127 | GUAUUCU |
| ENSG00000154127 | GUCAUUG |
| ENSG00000154127 | UCACACA |
| ENSG00000154127 | UCCCUGU |
| ENSG00000154127 | UCCUGAG |
| ENSG00000154127 | UGACUGU |
| ENSG00000154127 | UUGGUUC |
| ENSG00000154134 | GAUCAGA |
| ENSG00000154144 | AUCCCUU |
| ENSG00000154144 | CCUUCUU |
| ENSG00000154146 | AGGCAGG |
| ENSG00000154146 | CCAGGAG |
| ENSG00000154146 | CUCUGGG |
| ENSG00000154146 | GCCUGGG |
| ENSG00000154146 | GCGGAGG |
| ENSG00000154146 | GCGGGGC |
| ENSG00000154146 | UCACAUU |
| ENSG00000154153 | AAGGCAC |
| ENSG00000154162 | CUCUUC  |
| ENSG00000154162 | UAUUGCU |
| ENSG00000154174 | AAAGAGG |
| ENSG00000154174 | AAAGCUG |
| ENSG00000154174 | AUGUAAU |
| ENSG00000154174 | GGAAUGU |
| ENSG00000154174 | UACAAAG |
| ENSG00000154174 | UGUCUUU |
| ENSG00000154174 | UUGGUUC |
| ENSG00000154175 | AGGGAGG |
| ENSG00000154175 | AUACAAG |
| ENSG00000154175 | AUUCAUU |
| ENSG00000154188 | UAUAAAG |
| ENSG00000154217 | UCCUGAG |
| ENSG00000154222 | AGCAGCG |
| ENSG00000154222 | AGCAGCU |
| ENSG00000154222 | CUCCCAA |
| ENSG00000154222 | CUCCCAC |
| ENSG00000154222 | GAGCUGC |
| ENSG00000154222 | GCAGCAU |
| ENSG00000154222 | GUGACAG |
| ENSG00000154222 | UCCACA  |
| ENSG00000154222 | UCCACC  |
| ENSG00000154222 | UCCUUGC |
| ENSG00000154222 | UGUGCUU |
| ENSG00000154222 | UUAUGCA |
| ENSG00000154229 | AAAGUAC |
| ENSG00000154229 | AAAGUUU |
| ENSG00000154229 | AAGAACC |
| ENSG00000154229 | AAGUCUU |
| ENSG00000154229 | AAUACUG |
| ENSG00000154229 | AAUCUCA |
| ENSG00000154229 | AAUCUCU |
| ENSG00000154229 | ACUGCAG |
| ENSG00000154229 | ACUGUAG |
| ENSG00000154229 | AGGGUUG |
| ENSG00000154229 | AUAAAGU |
| ENSG00000154229 | AUAAUAC |
| ENSG00000154229 | AUGCAUU |
| ENSG00000154229 | AUGGCAC |
| ENSG00000154229 | CCUUCUG |
| ENSG00000154229 | CCUUCUU |

|                 |         |
|-----------------|---------|
| ENSG00000154229 | CUGCAGC |
| ENSG00000154229 | CUUUGGU |
| ENSG00000154229 | GCUUCCU |
| ENSG00000154229 | GGCUCAG |
| ENSG00000154229 | GGCUCUG |
| ENSG00000154229 | GUCUACU |
| ENSG00000154229 | UAUAAUA |
| ENSG00000154229 | UCAUUUG |
| ENSG00000154229 | UUCCUAG |
| ENSG00000154229 | UUGAUCA |
| ENSG00000154229 | UUUGCAA |
| ENSG00000154237 | AGCAGCG |
| ENSG00000154237 | AGCAGCU |
| ENSG00000154237 | AUUCAUU |
| ENSG00000154274 | CCCUGAG |
| ENSG00000154274 | CUCUGGG |
| ENSG00000154274 | GAUUGUC |
| ENSG00000154274 | UCCCUGU |
| ENSG00000154274 | UGGGUGA |
| ENSG00000154305 | AACAAAC |
| ENSG00000154305 | AAUCCUU |
| ENSG00000154305 | ACAUUAC |
| ENSG00000154305 | CAAAGUG |
| ENSG00000154305 | CUACAAA |
| ENSG00000154305 | GUAACAG |
| ENSG00000154305 | UACAAAG |
| ENSG00000154319 | UAUUGCU |
| ENSG00000154319 | UGACCUA |
| ENSG00000154319 | UUGGCAA |
| ENSG00000154330 | UGGCCCU |
| ENSG00000154342 | AGCAGCG |
| ENSG00000154342 | AGCAGCU |
| ENSG00000154342 | CACAGUG |
| ENSG00000154342 | GCAGCAU |
| ENSG00000154342 | UCACAGG |
| ENSG00000154342 | UCACAGU |
| ENSG00000154358 | GUGAGGU |
| ENSG00000154359 | UGCAAAG |
| ENSG00000154370 | CUUUGGU |
| ENSG00000154380 | AAACUGU |
| ENSG00000154380 | AACACUG |
| ENSG00000154380 | AACAUUC |
| ENSG00000154380 | AAGUGUG |
| ENSG00000154380 | AAUCUCU |
| ENSG00000154380 | AAUUGCU |
| ENSG00000154380 | ACAGUAC |
| ENSG00000154380 | ACAGUAU |
| ENSG00000154380 | ACUCAGC |
| ENSG00000154380 | ACUCAGG |
| ENSG00000154380 | ACUUGGA |
| ENSG00000154380 | AGCACCA |
| ENSG00000154380 | AGCAUUC |
| ENSG00000154380 | AGUGAUC |
| ENSG00000154380 | AGUGUGC |
| ENSG00000154380 | AUGAUGA |
| ENSG00000154380 | AUGCAUU |
| ENSG00000154380 | CAAGAGC |
| ENSG00000154380 | CACCAGC |
| ENSG00000154380 | CCAGUAC |
| ENSG00000154380 | CUCCAC  |
| ENSG00000154380 | CUGCUCU |
| ENSG00000154380 | CUGGACU |
| ENSG00000154380 | GAAAACA |
| ENSG00000154380 | GAGAAAU |

|                 |         |
|-----------------|---------|
| ENSG00000154380 | GAGCUGC |
| ENSG00000154380 | GAGGUAU |
| ENSG00000154380 | GCAGGUU |
| ENSG00000154380 | GGCAAGA |
| ENSG00000154380 | GUAAACA |
| ENSG00000154380 | GUGACAG |
| ENSG00000154380 | GUGUCAC |
| ENSG00000154380 | UAAGACG |
| ENSG00000154380 | UAAGACU |
| ENSG00000154380 | UCACAGG |
| ENSG00000154380 | UCACAGU |
| ENSG00000154380 | UCACAUU |
| ENSG00000154380 | UCAUAGA |
| ENSG00000154380 | UCAUGAU |
| ENSG00000154380 | UCCUGU  |
| ENSG00000154380 | UCCUGAG |
| ENSG00000154380 | UCUGGAA |
| ENSG00000154380 | UCUGGAG |
| ENSG00000154380 | UGAAAUG |
| ENSG00000154380 | UGAAGCU |
| ENSG00000154380 | UGAGGAC |
| ENSG00000154380 | UGCAUUA |
| ENSG00000154380 | UUAGGAU |
| ENSG00000154380 | UUGUUCG |
| ENSG00000154429 | GAGGUAG |
| ENSG00000154429 | GAUUGUC |
| ENSG00000154447 | AAGGCAC |
| ENSG00000154447 | ACAAGGU |
| ENSG00000154447 | ACAGUAC |
| ENSG00000154447 | UCACAGU |
| ENSG00000154478 | GACCAUG |
| ENSG00000154478 | GAGAAAU |
| ENSG00000154478 | GAUUGUC |
| ENSG00000154478 | UAUUGCU |
| ENSG00000154478 | UGAAAUG |
| ENSG00000154478 | UGCUCAC |
| ENSG00000154478 | UUCAAAU |
| ENSG00000154493 | AAAAAUC |
| ENSG00000154493 | AUGGCUU |
| ENSG00000154511 | AGCAGCU |
| ENSG00000154511 | UCACAGG |
| ENSG00000154511 | UCACAGU |
| ENSG00000154518 | AUGACAC |
| ENSG00000154518 | CACAGUG |
| ENSG00000154518 | CUACAGU |
| ENSG00000154518 | UAAUAUC |
| ENSG00000154518 | UCACAGU |
| ENSG00000154556 | AAAGCUG |
| ENSG00000154556 | AACACUG |
| ENSG00000154556 | AAGUCUU |
| ENSG00000154620 | AUGGCAC |
| ENSG00000154620 | CAGACAG |
| ENSG00000154640 | AAAAACC |
| ENSG00000154640 | AAAAAUC |
| ENSG00000154640 | AAGGUGC |
| ENSG00000154640 | ACAAUAU |
| ENSG00000154640 | ACUCAA  |
| ENSG00000154640 | AUAUAA  |
| ENSG00000154640 | GCAACUU |
| ENSG00000154640 | UGCAUUA |
| ENSG00000154640 | UUUGCAA |
| ENSG00000154642 | AAAGAGC |
| ENSG00000154642 | AAAGAGG |
| ENSG00000154642 | AAAGCUG |

|                 |         |
|-----------------|---------|
| ENSG00000154642 | AACACUG |
| ENSG00000154642 | AACAGUC |
| ENSG00000154642 | AAGGCAC |
| ENSG00000154642 | AAUUUUU |
| ENSG00000154642 | ACCAGCA |
| ENSG00000154642 | AGCACCA |
| ENSG00000154642 | AGCAUUC |
| ENSG00000154642 | AUAAAGU |
| ENSG00000154642 | AUUCAUU |
| ENSG00000154642 | CUGGAAA |
| ENSG00000154642 | GGAUUUU |
| ENSG00000154642 | GUAAACA |
| ENSG00000154642 | UGCUCAC |
| ENSG00000154642 | UUAUGCA |
| ENSG00000154642 | UUCAAGC |
| ENSG00000154645 | AAAGGUA |
| ENSG00000154645 | AUCCUUU |
| ENSG00000154645 | CUUACAG |
| ENSG00000154645 | GGGAGCU |
| ENSG00000154645 | GGGGAGC |
| ENSG00000154645 | UGCAAAG |
| ENSG00000154654 | UUGGUCC |
| ENSG00000154655 | AAUCUCA |
| ENSG00000154655 | ACAUCAC |
| ENSG00000154655 | AGCACCA |
| ENSG00000154655 | CUUUGGU |
| ENSG00000154655 | GUGCUUG |
| ENSG00000154655 | UCACACA |
| ENSG00000154655 | UGUGCUU |
| ENSG00000154710 | AAACUGU |
| ENSG00000154710 | ACAUAGA |
| ENSG00000154710 | AUGUCUG |
| ENSG00000154710 | CAGCAGA |
| ENSG00000154710 | CCCCUGG |
| ENSG00000154710 | CUUUGGU |
| ENSG00000154727 | AAAGAGC |
| ENSG00000154727 | AAAGAGG |
| ENSG00000154727 | AAGUCUU |
| ENSG00000154727 | AAGUGUG |
| ENSG00000154727 | AAUCUCU |
| ENSG00000154727 | ACCUGGA |
| ENSG00000154727 | AGCAGCA |
| ENSG00000154727 | AUGCACC |
| ENSG00000154727 | CAAAGUG |
| ENSG00000154727 | GAGGUAG |
| ENSG00000154727 | UAAUACA |
| ENSG00000154727 | UCCUGAG |
| ENSG00000154727 | UGACUGU |
| ENSG00000154727 | UGCAAAG |
| ENSG00000154727 | UGUAUAA |
| ENSG00000154727 | UGUGCUU |
| ENSG00000154734 | AGCAGCA |
| ENSG00000154734 | AGCAGCG |
| ENSG00000154734 | AGCAGCU |
| ENSG00000154734 | CCUUCUG |
| ENSG00000154734 | CUAGUAG |
| ENSG00000154734 | GAAGGAA |
| ENSG00000154734 | GAGGUAG |
| ENSG00000154734 | GAGGUAU |
| ENSG00000154734 | GGACCUG |
| ENSG00000154734 | UAUAUGA |
| ENSG00000154734 | UAUUACC |
| ENSG00000154736 | AAACUGU |
| ENSG00000154736 | AAAGUGC |

|                 |          |
|-----------------|----------|
| ENSG00000154736 | AACAGUC  |
| ENSG00000154736 | ACCACAG  |
| ENSG00000154736 | ACUGUUU  |
| ENSG00000154736 | AGCACCA  |
| ENSG00000154736 | AGCAGCA  |
| ENSG00000154736 | AGCUGCC  |
| ENSG00000154736 | CCAGUAC  |
| ENSG00000154736 | CCAGUGC  |
| ENSG00000154736 | CUGCCCC  |
| ENSG00000154736 | CUUUGGU  |
| ENSG00000154736 | GAGGUAG  |
| ENSG00000154736 | GAGGUAU  |
| ENSG00000154736 | GCUGGUG  |
| ENSG00000154736 | GUAAACA  |
| ENSG00000154736 | UAAUAGU  |
| ENSG00000154736 | UAUAAUA  |
| ENSG00000154736 | UCACAGU  |
| ENSG00000154736 | UUGGUCC  |
| ENSG00000154764 | AGCAGCA  |
| ENSG00000154764 | UAAUAUC  |
| ENSG00000154764 | UAUUGCU  |
| ENSG00000154767 | AGAUAAA  |
| ENSG00000154767 | CUGCAGC  |
| ENSG00000154781 | UCUGGAG  |
| ENSG00000154783 | AAGUGCU  |
| ENSG00000154783 | AGUGCUU  |
| ENSG00000154783 | AUAAAGU  |
| ENSG00000154803 | AGCAAAA  |
| ENSG00000154822 | AGUGCAA  |
| ENSG00000154822 | CAAAGCA  |
| ENSG00000154822 | GUGCAAA  |
| ENSG00000154822 | GUGCUUG  |
| ENSG00000154822 | UCACAGG  |
| ENSG00000154822 | UGCAAAG  |
| ENSG00000154832 | AACAAAC  |
| ENSG00000154832 | AAUUUUA  |
| ENSG00000154845 | ACCAGCA  |
| ENSG00000154845 | CAGGAAC  |
| ENSG00000154845 | CCAGCAU  |
| ENSG00000154845 | GGAAGAC  |
| ENSG00000154845 | UCAAGUA  |
| ENSG00000154864 | AAGGCAC  |
| ENSG00000154864 | AAGUCAC  |
| ENSG00000154864 | GUGCUUG  |
| ENSG00000154864 | UGAGAAG  |
| ENSG00000154864 | UUUUUGC  |
| ENSG00000154914 | AUAUUAU  |
| ENSG00000154917 | AAAGUAA  |
| ENSG00000154917 | AAAGUAU  |
| ENSG00000154917 | AACAGUC  |
| ENSG00000154917 | AAUUAUU  |
| ENSG00000154917 | AAUUUUA  |
| ENSG00000154917 | ACACACC  |
| ENSG00000154917 | ACACACU  |
| ENSG00000154917 | AGCACCA  |
| ENSG00000154917 | AGUAACA  |
| ENSG00000154917 | AUACAAG  |
| ENSG00000154917 | AUAU AAC |
| ENSG00000154917 | AUAUUAU  |
| ENSG00000154917 | AUGCAUU  |
| ENSG00000154917 | CAAAACU  |
| ENSG00000154917 | CACAAUG  |
| ENSG00000154917 | CCCUGAG  |
| ENSG00000154917 | CUUCACC  |

|                 |          |
|-----------------|----------|
| ENSG00000154917 | GCUUCCU  |
| ENSG00000154917 | GGAAGCC  |
| ENSG00000154917 | GGCAAGA  |
| ENSG00000154917 | GUAACAG  |
| ENSG00000154917 | UACAAAG  |
| ENSG00000154917 | UCACAAG  |
| ENSG00000154917 | UGAGAAG  |
| ENSG00000154917 | UGUAUAA  |
| ENSG00000154917 | UUGGCAC  |
| ENSG00000154920 | CAA AUGC |
| ENSG00000154928 | AAGACAU  |
| ENSG00000154928 | CAGCAAA  |
| ENSG00000154928 | UUUUUGC  |
| ENSG00000154930 | AAAGUAU  |
| ENSG00000154945 | AACAUUC  |
| ENSG00000154945 | AACCUGG  |
| ENSG00000154945 | AACCUGU  |
| ENSG00000154945 | AGUAACA  |
| ENSG00000154945 | GCACCAU  |
| ENSG00000154945 | GUCAACA  |
| ENSG00000154945 | UUGGUUC  |
| ENSG00000154975 | UACAAAG  |
| ENSG00000155011 | ACAUUAC  |
| ENSG00000155011 | CACAGUG  |
| ENSG00000155011 | CCUGUAC  |
| ENSG00000155011 | GCUACAU  |
| ENSG00000155011 | UCACAGG  |
| ENSG00000155011 | UUGGCAA  |
| ENSG00000155016 | CUCUCC   |
| ENSG00000155016 | GAGGCAG  |
| ENSG00000155034 | AGCACCA  |
| ENSG00000155034 | AGCAGCG  |
| ENSG00000155034 | CAA AUGC |
| ENSG00000155034 | GCAGAAG  |
| ENSG00000155034 | GCAGCAU  |
| ENSG00000155034 | UGCUGAC  |
| ENSG00000155034 | UUAGAGA  |
| ENSG00000155052 | UCUUGAG  |
| ENSG00000155052 | UUCCUAG  |
| ENSG00000155066 | CACAGGG  |
| ENSG00000155066 | CUUCUCU  |
| ENSG00000155066 | UCUGGAA  |
| ENSG00000155066 | UCUGGAG  |
| ENSG00000155087 | AGCUGCC  |
| ENSG00000155087 | GAGCUGC  |
| ENSG00000155090 | AAGUGCA  |
| ENSG00000155090 | CAAAGUG  |
| ENSG00000155090 | UAUAAAAG |
| ENSG00000155093 | AGAUAAA  |
| ENSG00000155093 | UUGGCAA  |
| ENSG00000155093 | UUGGCAC  |
| ENSG00000155096 | AAAACUG  |
| ENSG00000155096 | AAACUGU  |
| ENSG00000155096 | AAUCCUU  |
| ENSG00000155096 | ACUGUGU  |
| ENSG00000155096 | AGCCCUU  |
| ENSG00000155096 | AUACAAG  |
| ENSG00000155096 | AUCAUAC  |
| ENSG00000155096 | AUGUAAU  |
| ENSG00000155096 | AUUGCAC  |
| ENSG00000155096 | CUACAGU  |
| ENSG00000155096 | UAUUGCU  |
| ENSG00000155096 | UCAUACA  |
| ENSG00000155097 | AAAGGUA  |

|                 |         |
|-----------------|---------|
| ENSG00000155097 | AACAAAC |
| ENSG00000155097 | ACACACU |
| ENSG00000155097 | ACAUCAC |
| ENSG00000155097 | AUGUCUG |
| ENSG00000155097 | CAAAACU |
| ENSG00000155097 | CUUCUCU |
| ENSG00000155097 | GAUUGUC |
| ENSG00000155097 | GGGUGUU |
| ENSG00000155097 | GUGACAG |
| ENSG00000155097 | UGCAUAG |
| ENSG00000155097 | UUUGCAC |
| ENSG00000155099 | AGCAGCG |
| ENSG00000155099 | AGCAGCU |
| ENSG00000155099 | UAUUGCU |
| ENSG00000155099 | UGCAUAG |
| ENSG00000155100 | AUUCAUU |
| ENSG00000155100 | UCCAGAG |
| ENSG00000155111 | AAAACUG |
| ENSG00000155111 | AAAAGUA |
| ENSG00000155111 | AAAGUUU |
| ENSG00000155111 | AAGUGCU |
| ENSG00000155111 | AAUACUG |
| ENSG00000155111 | CAUAUUG |
| ENSG00000155111 | CCCUGAG |
| ENSG00000155111 | CUAUACA |
| ENSG00000155111 | GAGAAAU |
| ENSG00000155111 | GAUCAGA |
| ENSG00000155111 | GCACCAU |
| ENSG00000155111 | GCAGAAG |
| ENSG00000155111 | GCUGGAU |
| ENSG00000155111 | GCUGGUG |
| ENSG00000155111 | GUCUACU |
| ENSG00000155111 | GUGCAAA |
| ENSG00000155111 | UAUUGCU |
| ENSG00000155111 | UGCAUUG |
| ENSG00000155111 | UUAGGAU |
| ENSG00000155111 | UUGUGUC |
| ENSG00000155130 | AAAAACC |
| ENSG00000155130 | AAAGUAU |
| ENSG00000155130 | AAAGUUU |
| ENSG00000155130 | AAAUGGU |
| ENSG00000155130 | AAGUCAC |
| ENSG00000155130 | ACAGUAU |
| ENSG00000155130 | ACAUUCA |
| ENSG00000155130 | ACCUGGA |
| ENSG00000155130 | ACUGCAG |
| ENSG00000155130 | AGUGUGC |
| ENSG00000155130 | AUACAAG |
| ENSG00000155130 | AUCACUA |
| ENSG00000155130 | CAAAGCA |
| ENSG00000155130 | CACAGUG |
| ENSG00000155130 | CCAGUAC |
| ENSG00000155130 | CCUGCUG |
| ENSG00000155130 | CCUUCUG |
| ENSG00000155130 | CUAUACA |
| ENSG00000155130 | CUCCAGC |
| ENSG00000155130 | CUGGAAA |
| ENSG00000155130 | GAGAUGA |
| ENSG00000155130 | GCACCAU |
| ENSG00000155130 | GCUACAU |
| ENSG00000155130 | GCUGGUG |
| ENSG00000155130 | GGCAGGG |
| ENSG00000155130 | GGGAUCG |
| ENSG00000155130 | GGUGGUC |



|                 |         |
|-----------------|---------|
| ENSG00000155130 | GGUUGAC |
| ENSG00000155130 | GGUUGUC |
| ENSG00000155130 | GGUUUAC |
| ENSG00000155130 | GUAAACA |
| ENSG00000155130 | GUGCUUG |
| ENSG00000155130 | GUGGGGA |
| ENSG00000155130 | UAAGACU |
| ENSG00000155130 | UAAUAGU |
| ENSG00000155130 | UACAAAG |
| ENSG00000155130 | UAUGGUU |
| ENSG00000155130 | UCACAGU |
| ENSG00000155130 | UCCUAUA |
| ENSG00000155130 | UCUCAAG |
| ENSG00000155130 | UCUGGAA |
| ENSG00000155130 | UCUGGAG |
| ENSG00000155130 | UGCUCAC |
| ENSG00000155130 | UGGGAUC |
| ENSG00000155130 | UGUGCUU |
| ENSG00000155130 | UUGUGUC |
| ENSG00000155158 | ACAAUUA |
| ENSG00000155189 | AAAGAAU |
| ENSG00000155189 | AAAUUUC |
| ENSG00000155189 | AAGGCAC |
| ENSG00000155189 | AUAUAAC |
| ENSG00000155189 | CAGGAAC |
| ENSG00000155189 | CCAGCAU |
| ENSG00000155189 | UCACACA |
| ENSG00000155189 | UCAUGAU |
| ENSG00000155189 | UCUUGAG |
| ENSG00000155189 | UUUGCAC |
| ENSG00000155229 | GAUUGUC |
| ENSG00000155252 | ACAUUCA |
| ENSG00000155252 | AUUCAUU |
| ENSG00000155252 | GAUUGUC |
| ENSG00000155252 | GGGGCAG |
| ENSG00000155252 | GUGCUUG |
| ENSG00000155252 | UGUGCUU |
| ENSG00000155252 | UUGGCAA |
| ENSG00000155256 | CAGGAAC |
| ENSG00000155304 | AAGAACC |
| ENSG00000155304 | AGUGGUU |
| ENSG00000155304 | CUUUGGU |
| ENSG00000155304 | GGCAUUG |
| ENSG00000155304 | UUGGCAA |
| ENSG00000155304 | UUGGCAC |
| ENSG00000155313 | AAAACUG |
| ENSG00000155313 | ACCCUGU |
| ENSG00000155313 | AGCAGCG |
| ENSG00000155313 | AGCAGCU |
| ENSG00000155313 | CAGUCUG |
| ENSG00000155313 | UCAAGUA |
| ENSG00000155313 | UCACAGG |
| ENSG00000155313 | UUUGCAA |
| ENSG00000155313 | UUUGCAC |
| ENSG00000155324 | AGCAGCA |
| ENSG00000155324 | CAGCAGG |
| ENSG00000155324 | UGCUGAC |
| ENSG00000155329 | AAAGUAA |
| ENSG00000155329 | AAGGCAC |
| ENSG00000155363 | GUAAACA |
| ENSG00000155366 | AAGUGCU |
| ENSG00000155366 | AGUGCUG |
| ENSG00000155366 | AUAAAGU |
| ENSG00000155368 | AACAAAC |

|                 |          |
|-----------------|----------|
| ENSG00000155380 | AGCACCA  |
| ENSG00000155380 | UUCUAAU  |
| ENSG00000155465 | UGAAGCU  |
| ENSG00000155506 | AAAACUG  |
| ENSG00000155506 | AACUACU  |
| ENSG00000155506 | AAGACAU  |
| ENSG00000155506 | AAGGCAC  |
| ENSG00000155506 | AAUCACU  |
| ENSG00000155506 | AAUGUUG  |
| ENSG00000155506 | ACAGUAC  |
| ENSG00000155506 | ACCACAG  |
| ENSG00000155506 | AGCAGCG  |
| ENSG00000155506 | AGCAGCU  |
| ENSG00000155506 | AUACAAG  |
| ENSG00000155506 | AUAUAAU  |
| ENSG00000155506 | AUAUUAU  |
| ENSG00000155506 | AUCCUUU  |
| ENSG00000155506 | CAGCAGG  |
| ENSG00000155506 | CUGGAAA  |
| ENSG00000155506 | CUUUGGU  |
| ENSG00000155506 | GAAAACA  |
| ENSG00000155506 | GAGAAAU  |
| ENSG00000155506 | GAGAUGA  |
| ENSG00000155506 | GCAACUU  |
| ENSG00000155506 | GCAGAAG  |
| ENSG00000155506 | GCCUGGA  |
| ENSG00000155506 | GCUGGAU  |
| ENSG00000155506 | GGGAGCU  |
| ENSG00000155506 | GUAAACA  |
| ENSG00000155506 | UAAUACA  |
| ENSG00000155506 | UCCAGAG  |
| ENSG00000155506 | UGCAUAG  |
| ENSG00000155506 | UUCCUCG  |
| ENSG00000155506 | UUGGUCC  |
| ENSG00000155506 | UUGGUUC  |
| ENSG00000155508 | AAUACUG  |
| ENSG00000155508 | ACCAGCA  |
| ENSG00000155508 | AGCACCA  |
| ENSG00000155508 | GACAACU  |
| ENSG00000155508 | GCUGGUG  |
| ENSG00000155508 | UCAUUUG  |
| ENSG00000155508 | UCCUGAG  |
| ENSG00000155511 | AAAGAGC  |
| ENSG00000155511 | AAUCCUU  |
| ENSG00000155511 | AUCCUUU  |
| ENSG00000155511 | CACAGUG  |
| ENSG00000155511 | GAGAAAU  |
| ENSG00000155511 | GGAAGCC  |
| ENSG00000155511 | UAUUGCU  |
| ENSG00000155511 | UGAGAAG  |
| ENSG00000155511 | UGAGAAU  |
| ENSG00000155511 | UUCUUGU  |
| ENSG00000155511 | UUGGCAA  |
| ENSG00000155545 | AAAGCUG  |
| ENSG00000155545 | AAGUGCA  |
| ENSG00000155545 | AAGUGCU  |
| ENSG00000155545 | ACAUCAC  |
| ENSG00000155545 | AGAUAAA  |
| ENSG00000155545 | AGCACCA  |
| ENSG00000155545 | AGUGGUU  |
| ENSG00000155545 | AUAAAAGU |
| ENSG00000155545 | AUUGCAC  |
| ENSG00000155545 | CAUGGAU  |
| ENSG00000155545 | CCAGUGC  |

|                 |          |
|-----------------|----------|
| ENSG00000155545 | CCAGUGU  |
| ENSG00000155545 | CCUUCAU  |
| ENSG00000155545 | CUUUGGU  |
| ENSG00000155545 | GAAUUGU  |
| ENSG00000155545 | GGAUUUU  |
| ENSG00000155545 | UCCAGUU  |
| ENSG00000155545 | UGCAUAG  |
| ENSG00000155592 | AAAAAUC  |
| ENSG00000155592 | AAGACAU  |
| ENSG00000155592 | AUUCAUU  |
| ENSG00000155592 | GAGGUAU  |
| ENSG00000155592 | GAUCAGA  |
| ENSG00000155592 | GCACCAU  |
| ENSG00000155592 | UCACAGU  |
| ENSG00000155592 | UCCAGAG  |
| ENSG00000155592 | UCUAGAG  |
| ENSG00000155629 | AAGACAU  |
| ENSG00000155629 | AAUCACU  |
| ENSG00000155629 | ACCAGCA  |
| ENSG00000155629 | AUCCUUU  |
| ENSG00000155629 | CAGCAGG  |
| ENSG00000155629 | UAUAAAG  |
| ENSG00000155629 | UGGAGAU  |
| ENSG00000155657 | ACAGUAC  |
| ENSG00000155657 | AUGCCUU  |
| ENSG00000155657 | CAAAGUG  |
| ENSG00000155657 | CUUACAG  |
| ENSG00000155657 | UUGAGGC  |
| ENSG00000155660 | AAUUUUA  |
| ENSG00000155666 | CCUUCUG  |
| ENSG00000155729 | AAAGUUU  |
| ENSG00000155729 | AUGCAUU  |
| ENSG00000155744 | AAUCUCU  |
| ENSG00000155744 | ACAUCAC  |
| ENSG00000155744 | AUGGAUU  |
| ENSG00000155744 | CACUCCU  |
| ENSG00000155744 | GAGGCAG  |
| ENSG00000155744 | GGAAGAC  |
| ENSG00000155744 | UCACAGU  |
| ENSG00000155744 | UGUUGAA  |
| ENSG00000155754 | AAAUGGU  |
| ENSG00000155755 | AAAAACC  |
| ENSG00000155755 | AACACUG  |
| ENSG00000155755 | AAUACUG  |
| ENSG00000155755 | ACAUUCA  |
| ENSG00000155755 | GGAUUUC  |
| ENSG00000155755 | GUGACAG  |
| ENSG00000155755 | UCAACAG  |
| ENSG00000155755 | UGAAAUG  |
| ENSG00000155755 | UUCUUGU  |
| ENSG00000155760 | AAAGUGC  |
| ENSG00000155760 | CAA AUGC |
| ENSG00000155760 | CACAGUG  |
| ENSG00000155760 | CUGGAAA  |
| ENSG00000155760 | CUGGGCA  |
| ENSG00000155760 | GACCCUG  |
| ENSG00000155760 | GGAAUGU  |
| ENSG00000155760 | UAUGGUU  |
| ENSG00000155760 | UCACAGU  |
| ENSG00000155760 | UCCAGUU  |
| ENSG00000155760 | UGAAGUG  |
| ENSG00000155760 | UGGCCCU  |
| ENSG00000155760 | UUCAAAU  |
| ENSG00000155760 | UUGUGAC  |

|                 |         |
|-----------------|---------|
| ENSG00000155816 | UGAAAUG |
| ENSG00000155827 | GGAAGAC |
| ENSG00000155846 | CAUAUUG |
| ENSG00000155846 | GAAAACA |
| ENSG00000155846 | GAGGUAG |
| ENSG00000155846 | GUAAACA |
| ENSG00000155849 | AUGUCUG |
| ENSG00000155849 | CACAGUG |
| ENSG00000155849 | GUAAACA |
| ENSG00000155849 | GUGCUUG |
| ENSG00000155849 | UAGACUG |
| ENSG00000155849 | UUGGCAC |
| ENSG00000155849 | UUGGUCC |
| ENSG00000155850 | ACUGGCU |
| ENSG00000155850 | UUCAAAU |
| ENSG00000155858 | AGCACCA |
| ENSG00000155858 | GAGGCAG |
| ENSG00000155858 | GAGGUAG |
| ENSG00000155858 | GAGGUAU |
| ENSG00000155858 | GCACCAU |
| ENSG00000155858 | GUGAGGU |
| ENSG00000155876 | AGCAGCA |
| ENSG00000155876 | CAAAGCA |
| ENSG00000155876 | UAUAAAG |
| ENSG00000155886 | AUGGCUU |
| ENSG00000155893 | AAGUGCA |
| ENSG00000155893 | AAGUGCU |
| ENSG00000155893 | AGUGCUG |
| ENSG00000155893 | CAAAGUG |
| ENSG00000155893 | CAGCAGA |
| ENSG00000155926 | GAGAAGA |
| ENSG00000155926 | GAUCAGA |
| ENSG00000155926 | GCUUCCU |
| ENSG00000155926 | GUGUCAC |
| ENSG00000155926 | UAAUGCU |
| ENSG00000155926 | UCCACC  |
| ENSG00000155926 | UUCUUGU |
| ENSG00000155961 | ACUGGAU |
| ENSG00000155961 | ACUGGCU |
| ENSG00000155961 | AUACAAG |
| ENSG00000155961 | AUGGCUU |
| ENSG00000155961 | CAGUGCA |
| ENSG00000155961 | GUAAACA |
| ENSG00000155961 | UACAGUU |
| ENSG00000155961 | UCAUUCG |
| ENSG00000155961 | UGAGAAU |
| ENSG00000155961 | UGGAUAA |
| ENSG00000155962 | AGUGGUU |
| ENSG00000155966 | AAAGAGG |
| ENSG00000155966 | AACAGUC |
| ENSG00000155966 | AAUCCUU |
| ENSG00000155966 | ACCCAUU |
| ENSG00000155966 | ACUGCAU |
| ENSG00000155966 | ACUGGCU |
| ENSG00000155966 | ACUGUAG |
| ENSG00000155966 | AGCACCA |
| ENSG00000155966 | AGGACAC |
| ENSG00000155966 | AGGUAGU |
| ENSG00000155966 | AGUGAUC |
| ENSG00000155966 | CACCAGC |
| ENSG00000155966 | CAGCAAA |
| ENSG00000155966 | CAGGUGA |
| ENSG00000155966 | CCCACCU |
| ENSG00000155966 | CUCAGGG |

|                 |         |
|-----------------|---------|
| ENSG00000155966 | CUGGCUC |
| ENSG00000155966 | CUGUUGA |
| ENSG00000155966 | CUUCUCU |
| ENSG00000155966 | GACAACU |
| ENSG00000155966 | GACUUCC |
| ENSG00000155966 | GAGAAGA |
| ENSG00000155966 | GAGGUAG |
| ENSG00000155966 | GCAGGUU |
| ENSG00000155966 | GGCAGUG |
| ENSG00000155966 | GGCUCAG |
| ENSG00000155966 | GGGUGUU |
| ENSG00000155966 | GUGCCUG |
| ENSG00000155966 | UCAACAG |
| ENSG00000155966 | UCCAGUU |
| ENSG00000155966 | UCCCACC |
| ENSG00000155966 | UGAGAAG |
| ENSG00000155966 | UGGCCCU |
| ENSG00000155966 | UGGGUGA |
| ENSG00000155966 | UUCCAUA |
| ENSG00000155966 | UUGGUUC |
| ENSG00000155966 | UUUCAAC |
| ENSG00000155970 | CACAGUG |
| ENSG00000155975 | UAUAAAG |
| ENSG00000155975 | UUUGCAA |
| ENSG00000155980 | AAAGUGC |
| ENSG00000155980 | AAGUGCA |
| ENSG00000155980 | ACCACAG |
| ENSG00000155980 | AGCAGCG |
| ENSG00000155980 | GCAGCAU |
| ENSG00000155980 | GCAGGUU |
| ENSG00000155980 | UCCCUCU |
| ENSG00000155980 | UGCAGCU |
| ENSG00000155984 | ACACACC |
| ENSG00000155984 | AGCAAAA |
| ENSG00000155984 | GAGAUGA |
| ENSG00000156011 | AAGGUGC |
| ENSG00000156011 | AAUCCUU |
| ENSG00000156011 | ACAGUAC |
| ENSG00000156011 | ACCAGCA |
| ENSG00000156011 | AUGCACC |
| ENSG00000156011 | AUGGCAC |
| ENSG00000156011 | AUGGCUU |
| ENSG00000156011 | CCAGUAC |
| ENSG00000156011 | CCUUCAU |
| ENSG00000156011 | CUCCAUA |
| ENSG00000156011 | CUGGACU |
| ENSG00000156011 | CUUUGGU |
| ENSG00000156011 | GAAAACA |
| ENSG00000156011 | GAGACCU |
| ENSG00000156011 | GAGAUGA |
| ENSG00000156011 | GGCUCUG |
| ENSG00000156011 | GUAAACA |
| ENSG00000156011 | GUCCAGA |
| ENSG00000156011 | GUCUACU |
| ENSG00000156011 | UAAGACU |
| ENSG00000156011 | UAUAAAG |
| ENSG00000156011 | UCAAGUA |
| ENSG00000156011 | UCCAGUU |
| ENSG00000156011 | UGCAUAU |
| ENSG00000156011 | UUCAAAU |
| ENSG00000156011 | UUCUAAU |
| ENSG00000156011 | UUGGUCC |
| ENSG00000156017 | GUUAGGA |
| ENSG00000156017 | UGUGUCA |

|                 |         |
|-----------------|---------|
| ENSG00000156017 | UUGUGUC |
| ENSG00000156026 | AAGGCAC |
| ENSG00000156026 | AGCCCUU |
| ENSG00000156026 | GGAUUUU |
| ENSG00000156030 | AAAAAUC |
| ENSG00000156030 | AAAAGUA |
| ENSG00000156030 | AAAGCUG |
| ENSG00000156030 | AACAUUC |
| ENSG00000156030 | AAGGCAC |
| ENSG00000156030 | AAGUAGC |
| ENSG00000156030 | ACAAUAU |
| ENSG00000156030 | ACAUAGA |
| ENSG00000156030 | AGCACCA |
| ENSG00000156030 | AGCAGCA |
| ENSG00000156030 | AGCAGCU |
| ENSG00000156030 | AGGAUGU |
| ENSG00000156030 | AUCCCUU |
| ENSG00000156030 | AUGGCUU |
| ENSG00000156030 | AUGUAAU |
| ENSG00000156030 | CCCUUGG |
| ENSG00000156030 | CCUGAG  |
| ENSG00000156030 | CCUGCUG |
| ENSG00000156030 | CCUGUAC |
| ENSG00000156030 | CCUUCUU |
| ENSG00000156030 | CUCCCAA |
| ENSG00000156030 | CUGCAGC |
| ENSG00000156030 | CUUCUCU |
| ENSG00000156030 | GAAACAU |
| ENSG00000156030 | GAGACCU |
| ENSG00000156030 | GCACCAU |
| ENSG00000156030 | GGCAGUG |
| ENSG00000156030 | GGCUCUG |
| ENSG00000156030 | GUAAACA |
| ENSG00000156030 | GUGCUUG |
| ENSG00000156030 | UAAUAUC |
| ENSG00000156030 | UAUAUGA |
| ENSG00000156030 | UCCAGAG |
| ENSG00000156030 | UCCCUUU |
| ENSG00000156030 | UGAGAAG |
| ENSG00000156030 | UGGGACA |
| ENSG00000156030 | UGUGCUU |
| ENSG00000156030 | UUCAAAU |
| ENSG00000156050 | AAUUUUA |
| ENSG00000156052 | AUGGCAC |
| ENSG00000156052 | UCCUCU  |
| ENSG00000156097 | GAUUGUC |
| ENSG00000156097 | GUCCAGA |
| ENSG00000156103 | AAAGCUG |
| ENSG00000156103 | AACAGUC |
| ENSG00000156103 | AAUACUG |
| ENSG00000156103 | AAUCUCA |
| ENSG00000156103 | AGCAGCU |
| ENSG00000156103 | AUUGCAC |
| ENSG00000156103 | CAUGGAU |
| ENSG00000156103 | CCCACCU |
| ENSG00000156103 | CUCCCAA |
| ENSG00000156103 | CUGACUC |
| ENSG00000156103 | CUGCAGG |
| ENSG00000156103 | CUUCACC |
| ENSG00000156103 | CUUUGGU |
| ENSG00000156103 | GAGAACU |
| ENSG00000156103 | GCAGGAC |
| ENSG00000156103 | GGAAGCC |
| ENSG00000156103 | GGCUCUG |

|                 |         |
|-----------------|---------|
| ENSG00000156103 | GGGUCUU |
| ENSG00000156103 | GGUGGUC |
| ENSG00000156103 | GUCAGUU |
| ENSG00000156103 | GUUAGGA |
| ENSG00000156103 | UCAAGUA |
| ENSG00000156103 | UCACACA |
| ENSG00000156103 | UCCCACC |
| ENSG00000156103 | UCUCAAG |
| ENSG00000156103 | UGCUGAC |
| ENSG00000156103 | UGGAGAU |
| ENSG00000156103 | UGGCCCU |
| ENSG00000156103 | UGUAUAA |
| ENSG00000156113 | AACAGUC |
| ENSG00000156113 | AAUGUUG |
| ENSG00000156113 | ACACACC |
| ENSG00000156113 | ACAUUCA |
| ENSG00000156113 | ACCACAG |
| ENSG00000156113 | ACCAGCA |
| ENSG00000156113 | ACUGCAG |
| ENSG00000156113 | AGCACCA |
| ENSG00000156113 | AGUAGUU |
| ENSG00000156113 | AGUGAUC |
| ENSG00000156113 | AUGUGGG |
| ENSG00000156113 | CAGGCUC |
| ENSG00000156113 | CAUGGGU |
| ENSG00000156113 | CCAGCAU |
| ENSG00000156113 | CUAUACA |
| ENSG00000156113 | CUGCAGC |
| ENSG00000156113 | CUGCAGG |
| ENSG00000156113 | GAAGGAA |
| ENSG00000156113 | GACCAUG |
| ENSG00000156113 | GCAGGAC |
| ENSG00000156113 | GGAAGCC |
| ENSG00000156113 | GGAUUUU |
| ENSG00000156113 | GGCUCUG |
| ENSG00000156113 | GGUGGGU |
| ENSG00000156113 | GGUGGGC |
| ENSG00000156113 | GGUUGAC |
| ENSG00000156113 | GGUUGUC |
| ENSG00000156113 | GUAUGUU |
| ENSG00000156113 | GUCAACA |
| ENSG00000156113 | GUGCCAC |
| ENSG00000156113 | UAUAAAG |
| ENSG00000156113 | UCACAAG |
| ENSG00000156113 | UCCAGAG |
| ENSG00000156113 | UGAAAGG |
| ENSG00000156113 | UUCAAAU |
| ENSG00000156113 | UUCCAUA |
| ENSG00000156113 | UUUGCAA |
| ENSG00000156113 | UUUGCAC |
| ENSG00000156140 | AUGCAUU |
| ENSG00000156140 | CAGUAGA |
| ENSG00000156140 | GUAGUGU |
| ENSG00000156140 | UGCAUUG |
| ENSG00000156150 | GGAGGCA |
| ENSG00000156162 | AGCAAAA |
| ENSG00000156162 | AGCAGCA |
| ENSG00000156162 | GGCUCUG |
| ENSG00000156162 | UAAUACA |
| ENSG00000156162 | UCAUGAU |
| ENSG00000156162 | UCCAGUU |
| ENSG00000156172 | GGCAGUG |
| ENSG00000156194 | ACAGGUG |
| ENSG00000156194 | AGUGGUU |

|                 |         |
|-----------------|---------|
| ENSG00000156194 | AUAAAGU |
| ENSG00000156218 | ACAGUAU |
| ENSG00000156218 | ACUGGCU |
| ENSG00000156218 | AGCAGCA |
| ENSG00000156218 | AGUGCUG |
| ENSG00000156218 | AUACAAG |
| ENSG00000156218 | CCAGUGU |
| ENSG00000156218 | CUUCACC |
| ENSG00000156218 | GCAGCAU |
| ENSG00000156218 | GCUGGUG |
| ENSG00000156218 | GUGCAA  |
| ENSG00000156218 | UAUUACC |
| ENSG00000156253 | AAAAAUC |
| ENSG00000156256 | GUCAGUU |
| ENSG00000156269 | UCUCCAA |
| ENSG00000156273 | AAAGAAU |
| ENSG00000156273 | AAGUUGU |
| ENSG00000156273 | ACAGUAC |
| ENSG00000156273 | AGGUAGU |
| ENSG00000156273 | CAAAGCA |
| ENSG00000156273 | CCCUGAG |
| ENSG00000156273 | GAGGUAU |
| ENSG00000156273 | GUAAACA |
| ENSG00000156273 | GUAGUGU |
| ENSG00000156273 | UAUUACC |
| ENSG00000156273 | UCUGGAG |
| ENSG00000156273 | UGACAUC |
| ENSG00000156273 | UGGCCAC |
| ENSG00000156273 | UGUCUUU |
| ENSG00000156273 | UUUGCAC |
| ENSG00000156284 | CCUUCUU |
| ENSG00000156284 | CUCUGGG |
| ENSG00000156284 | GGAUUUC |
| ENSG00000156284 | UAUCAGA |
| ENSG00000156284 | UGCAAAG |
| ENSG00000156298 | ACAAUAU |
| ENSG00000156298 | CACAAUG |
| ENSG00000156299 | AAAGCUG |
| ENSG00000156299 | AAAGUUU |
| ENSG00000156299 | AAGAACC |
| ENSG00000156299 | ACAUAGA |
| ENSG00000156299 | AGCACCA |
| ENSG00000156299 | AGCUGCC |
| ENSG00000156299 | AUGGCAC |
| ENSG00000156299 | CAAAACU |
| ENSG00000156299 | CCCUGUU |
| ENSG00000156299 | CUCACAC |
| ENSG00000156299 | GUGCAA  |
| ENSG00000156299 | GUGUCAC |
| ENSG00000156299 | UACAAAG |
| ENSG00000156299 | UCACACA |
| ENSG00000156299 | UCUCCAA |
| ENSG00000156299 | UCUGGAA |
| ENSG00000156299 | UGACAUC |
| ENSG00000156299 | UGUGUCA |
| ENSG00000156299 | UUCAAAU |
| ENSG00000156299 | UUGACAC |
| ENSG00000156299 | UUGGCAA |
| ENSG00000156299 | UUGGCAC |
| ENSG00000156304 | AAUUGCU |
| ENSG00000156374 | AUGCAUU |
| ENSG00000156374 | CCCUGAG |
| ENSG00000156374 | GCAGAAG |
| ENSG00000156384 | AACAUUC |



|                 |          |
|-----------------|----------|
| ENSG00000156384 | UCUCAAG  |
| ENSG00000156384 | UCUGGAG  |
| ENSG00000156395 | AAGUUGU  |
| ENSG00000156395 | ACAGUAC  |
| ENSG00000156395 | AGGCAGG  |
| ENSG00000156395 | AUUGCAC  |
| ENSG00000156395 | CAAAACU  |
| ENSG00000156395 | GGCAGGG  |
| ENSG00000156395 | GUAAACA  |
| ENSG00000156395 | GUGACAG  |
| ENSG00000156395 | UACAGUU  |
| ENSG00000156395 | UCAACAG  |
| ENSG00000156395 | UCCAGUU  |
| ENSG00000156395 | UGUCUGG  |
| ENSG00000156398 | AGGGAGG  |
| ENSG00000156398 | GGAGGCA  |
| ENSG00000156398 | UCCCUUG  |
| ENSG00000156427 | AAAAAUC  |
| ENSG00000156427 | CUCUGGG  |
| ENSG00000156427 | CUGGGGG  |
| ENSG00000156427 | CUUUGGU  |
| ENSG00000156427 | GUCAACA  |
| ENSG00000156427 | UCAAGUA  |
| ENSG00000156427 | UUCAAGC  |
| ENSG00000156453 | ACCAGCA  |
| ENSG00000156453 | AGCCCUU  |
| ENSG00000156453 | AGGCAGG  |
| ENSG00000156453 | CAGCAGG  |
| ENSG00000156453 | CCAGGAG  |
| ENSG00000156453 | CCCACCU  |
| ENSG00000156453 | CCCCCAG  |
| ENSG00000156453 | CUUUGGU  |
| ENSG00000156453 | GACCCUG  |
| ENSG00000156453 | GGGGUGC  |
| ENSG00000156463 | GAGGCAG  |
| ENSG00000156466 | AAAAAUC  |
| ENSG00000156466 | AACACUG  |
| ENSG00000156466 | AAUUAAU  |
| ENSG00000156466 | ACAUUAC  |
| ENSG00000156466 | ACUGUAG  |
| ENSG00000156466 | AUAUUAU  |
| ENSG00000156466 | CACAGUG  |
| ENSG00000156466 | CAGUGCA  |
| ENSG00000156466 | GAAUUGU  |
| ENSG00000156466 | GAGGUAU  |
| ENSG00000156466 | GCAUCC   |
| ENSG00000156466 | GGAAUGU  |
| ENSG00000156466 | GGGGAGC  |
| ENSG00000156466 | GGUAGAC  |
| ENSG00000156466 | GUAACAG  |
| ENSG00000156466 | UCACAGG  |
| ENSG00000156466 | UUCUUGU  |
| ENSG00000156466 | UUUGCAC  |
| ENSG00000156467 | AAAGAGG  |
| ENSG00000156467 | ACAUCAC  |
| ENSG00000156467 | AGCUUUAU |
| ENSG00000156467 | AUUCAUU  |
| ENSG00000156467 | GUAUGUU  |
| ENSG00000156467 | GUCAGUU  |
| ENSG00000156467 | UGAAGUG  |
| ENSG00000156467 | UUCAAAU  |
| ENSG00000156467 | UUUCAAC  |
| ENSG00000156471 | AAGGCAC  |
| ENSG00000156471 | ACCAGCA  |

|                 |         |
|-----------------|---------|
| ENSG00000156471 | AUGGCAC |
| ENSG00000156486 | ACACACC |
| ENSG00000156486 | AUCCUUG |
| ENSG00000156486 | UGCAAAG |
| ENSG00000156486 | UGCUGAC |
| ENSG00000156504 | ACAAUAU |
| ENSG00000156504 | AGCAGCA |
| ENSG00000156504 | AGGCAGG |
| ENSG00000156504 | CAAAGCA |
| ENSG00000156504 | CUUCUCU |
| ENSG00000156504 | UCCCUUU |
| ENSG00000156508 | AAAAGUA |
| ENSG00000156508 | AAAUGGU |
| ENSG00000156508 | AAGUUGU |
| ENSG00000156508 | AUGCAUU |
| ENSG00000156508 | CCAUUAC |
| ENSG00000156508 | CCUUCUU |
| ENSG00000156508 | CUCAAAC |
| ENSG00000156508 | GAAGGUC |
| ENSG00000156508 | GAGACCU |
| ENSG00000156508 | GGCAGGG |
| ENSG00000156508 | GGGGUGC |
| ENSG00000156508 | GGGUCUU |
| ENSG00000156508 | UUCCAUA |
| ENSG00000156508 | UUGGUCC |
| ENSG00000156515 | AAAGUUU |
| ENSG00000156515 | AAGUGCU |
| ENSG00000156515 | AGUGCUG |
| ENSG00000156515 | UACAAAG |
| ENSG00000156521 | AAGGCAC |
| ENSG00000156521 | CCCUGAG |
| ENSG00000156521 | CUGGAAA |
| ENSG00000156521 | GAGUCUU |
| ENSG00000156521 | GGCCUG  |
| ENSG00000156521 | UGAGUCU |
| ENSG00000156531 | AAAGUGC |
| ENSG00000156531 | AACCUGU |
| ENSG00000156531 | AAGUGCU |
| ENSG00000156531 | AUUCAUU |
| ENSG00000156531 | GGGUAAG |
| ENSG00000156531 | UAAUAGU |
| ENSG00000156531 | UUCAAGC |
| ENSG00000156535 | GGUCUAG |
| ENSG00000156535 | UCUGGAA |
| ENSG00000156564 | ACAUCAC |
| ENSG00000156564 | CCCUGAG |
| ENSG00000156564 | GGCUCAG |
| ENSG00000156564 | UCCCUGU |
| ENSG00000156575 | AGGGUCU |
| ENSG00000156587 | CCCCUGG |
| ENSG00000156599 | AAUUAUU |
| ENSG00000156599 | ACACACC |
| ENSG00000156599 | ACACACU |
| ENSG00000156599 | AUAUAAC |
| ENSG00000156599 | AUUGCAC |
| ENSG00000156599 | CACACCU |
| ENSG00000156599 | CCUGCUG |
| ENSG00000156599 | CUCAGGG |
| ENSG00000156599 | CUUUGGU |
| ENSG00000156599 | GGUGGGC |
| ENSG00000156599 | UAUUGCU |
| ENSG00000156599 | UGAGUCU |
| ENSG00000156599 | UUGGCAA |
| ENSG00000156599 | UUGGCAC |

|                 |          |
|-----------------|----------|
| ENSG00000156603 | AGCUGCC  |
| ENSG00000156603 | CCUUCUU  |
| ENSG00000156603 | CUGGACU  |
| ENSG00000156603 | CUUGUGU  |
| ENSG00000156603 | GAGCUGC  |
| ENSG00000156603 | GGGUGGU  |
| ENSG00000156603 | UUCUUGU  |
| ENSG00000156639 | AAAGUUU  |
| ENSG00000156639 | AAAUCCC  |
| ENSG00000156639 | ACAUAUC  |
| ENSG00000156639 | AAGGCAC  |
| ENSG00000156639 | ACAAGGU  |
| ENSG00000156639 | ACAGUAU  |
| ENSG00000156639 | ACUCCAG  |
| ENSG00000156639 | ACUGCAG  |
| ENSG00000156639 | AGUAACA  |
| ENSG00000156639 | CACCAGC  |
| ENSG00000156639 | CAGCAGA  |
| ENSG00000156639 | CCAGCAU  |
| ENSG00000156639 | CUACAGU  |
| ENSG00000156639 | CUCCAGC  |
| ENSG00000156639 | CUGGCUC  |
| ENSG00000156639 | GAGCUAA  |
| ENSG00000156639 | GAUUGGU  |
| ENSG00000156639 | GCUAGCA  |
| ENSG00000156639 | GGUUUAC  |
| ENSG00000156639 | UAAUAUC  |
| ENSG00000156639 | UAGUGAG  |
| ENSG00000156639 | UCACAAG  |
| ENSG00000156639 | UCACAGG  |
| ENSG00000156639 | UCACAGU  |
| ENSG00000156639 | UGAAAGG  |
| ENSG00000156639 | UGCAUAG  |
| ENSG00000156639 | UGUCUGG  |
| ENSG00000156639 | UUUCAAC  |
| ENSG00000156642 | ACAUUCA  |
| ENSG00000156642 | ACUAGAU  |
| ENSG00000156642 | ACUGUAG  |
| ENSG00000156642 | AGCCCUU  |
| ENSG00000156642 | AGUGCAA  |
| ENSG00000156642 | AUCACUA  |
| ENSG00000156642 | GCCCUUA  |
| ENSG00000156642 | GGCAGCG  |
| ENSG00000156642 | GUGCAAA  |
| ENSG00000156642 | UAUAAAAG |
| ENSG00000156642 | UGCAUAU  |
| ENSG00000156650 | AAAAAUC  |
| ENSG00000156650 | AAAGCUG  |
| ENSG00000156650 | AACACUG  |
| ENSG00000156650 | AAGACAU  |
| ENSG00000156650 | AAUUGCU  |
| ENSG00000156650 | AGCUGCC  |
| ENSG00000156650 | AUGGCUU  |
| ENSG00000156650 | GCAACUU  |
| ENSG00000156650 | UACAAAG  |
| ENSG00000156650 | UAUAUGA  |
| ENSG00000156650 | UGGCCCU  |
| ENSG00000156671 | GAGUCUU  |
| ENSG00000156675 | AAAGGUA  |
| ENSG00000156675 | AAAGUGC  |
| ENSG00000156675 | AACCUGU  |
| ENSG00000156675 | AAGUGCU  |
| ENSG00000156675 | AAUCUCU  |
| ENSG00000156675 | CACAGUG  |

|                 |         |
|-----------------|---------|
| ENSG00000156675 | CAGCAAA |
| ENSG00000156675 | CUACAAA |
| ENSG00000156675 | GAGAAGA |
| ENSG00000156675 | GAGAUGA |
| ENSG00000156675 | GGCAUUG |
| ENSG00000156675 | GGUUUAC |
| ENSG00000156675 | UACAGUU |
| ENSG00000156675 | UCACAGU |
| ENSG00000156675 | UCCAGAG |
| ENSG00000156687 | AAAGAGC |
| ENSG00000156687 | AAAGAGG |
| ENSG00000156687 | AGAUAAA |
| ENSG00000156687 | AUGGCAC |
| ENSG00000156687 | CUUACAG |
| ENSG00000156687 | GAGAAAU |
| ENSG00000156687 | GAGAACC |
| ENSG00000156687 | GCUGGUG |
| ENSG00000156687 | GUAAACA |
| ENSG00000156687 | UACAAAG |
| ENSG00000156687 | UCCUGAG |
| ENSG00000156687 | UUGGUUC |
| ENSG00000156687 | UUUCAAC |
| ENSG00000156711 | CUCCCAA |
| ENSG00000156853 | GAGGUAU |
| ENSG00000156853 | UCCACA  |
| ENSG00000156858 | ACUAGAU |
| ENSG00000156860 | AAAAAUC |
| ENSG00000156860 | ACUUGGA |
| ENSG00000156860 | AGACCA  |
| ENSG00000156860 | AGCCCUU |
| ENSG00000156860 | AUAUAAC |
| ENSG00000156860 | CAGUCUG |
| ENSG00000156860 | CCUGCUG |
| ENSG00000156860 | CUCUGGG |
| ENSG00000156860 | CUGGCUC |
| ENSG00000156860 | CUGGGGG |
| ENSG00000156860 | CUUUGGU |
| ENSG00000156860 | GAGCCCC |
| ENSG00000156860 | GAGGCAG |
| ENSG00000156860 | GAGGGGC |
| ENSG00000156860 | GGAGGCA |
| ENSG00000156860 | GGGUGGU |
| ENSG00000156860 | UAGUGAG |
| ENSG00000156875 | AAAGCUG |
| ENSG00000156875 | AUAAAGU |
| ENSG00000156875 | CAUACA  |
| ENSG00000156875 | GAGAAAU |
| ENSG00000156875 | GUUUUCU |
| ENSG00000156875 | UAUAAAG |
| ENSG00000156875 | UCAAGUA |
| ENSG00000156875 | UCACAUU |
| ENSG00000156920 | UCACAAG |
| ENSG00000156925 | AAAGCUG |
| ENSG00000156925 | AAGACAU |
| ENSG00000156925 | GAGAAAU |
| ENSG00000156925 | GAUAUGU |
| ENSG00000156925 | UAAGACU |
| ENSG00000156925 | UCCUGAG |
| ENSG00000156925 | UUGGCAA |
| ENSG00000156925 | UUGGCAC |
| ENSG00000156958 | ACUGUGU |
| ENSG00000156959 | AAAGUAU |
| ENSG00000156959 | ACCCUGU |
| ENSG00000156959 | AGCAGCA |

|                 |         |
|-----------------|---------|
| ENSG00000156959 | CAGACAG |
| ENSG00000156959 | GACCCUG |
| ENSG00000156959 | GACCUGG |
| ENSG00000156959 | GGCAGGG |
| ENSG00000156959 | GGCUCUG |
| ENSG00000156959 | GGUGGGC |
| ENSG00000156959 | GUCUCUG |
| ENSG00000156959 | UCAAGUA |
| ENSG00000156959 | UCCAGAG |
| ENSG00000156959 | UCCCUUU |
| ENSG00000156959 | UGAAGCU |
| ENSG00000156959 | UUAUGCA |
| ENSG00000156976 | AACAGUC |
| ENSG00000156976 | AUGCAUU |
| ENSG00000156976 | CACAAUG |
| ENSG00000156976 | CAGCAA  |
| ENSG00000156976 | GUGCAA  |
| ENSG00000156976 | UAAUACA |
| ENSG00000156976 | UGGCUGC |
| ENSG00000156983 | ACAGUAC |
| ENSG00000156983 | ACUGGCC |
| ENSG00000156983 | CAGUCCA |
| ENSG00000156983 | CAGUGCA |
| ENSG00000156983 | CAGUUAC |
| ENSG00000156983 | CCCCUGG |
| ENSG00000156983 | CCCUGAG |
| ENSG00000156983 | UACAAAG |
| ENSG00000156983 | UACAGUU |
| ENSG00000156990 | GAGGUAG |
| ENSG00000157014 | AGCACCA |
| ENSG00000157020 | AAGGCAC |
| ENSG00000157045 | CUUUGGU |
| ENSG00000157064 | AAAACUG |
| ENSG00000157064 | AAGAACC |
| ENSG00000157064 | ACAUUCA |
| ENSG00000157064 | AGCAGCA |
| ENSG00000157064 | AGCAGCG |
| ENSG00000157064 | AGCAGCU |
| ENSG00000157064 | AGGCAGG |
| ENSG00000157064 | CACUGUU |
| ENSG00000157064 | CCAGUAC |
| ENSG00000157064 | CGCCUCC |
| ENSG00000157064 | CUCUAGC |
| ENSG00000157064 | GAGGCAG |
| ENSG00000157064 | GAGGCUG |
| ENSG00000157064 | UAGAGGA |
| ENSG00000157064 | UCCUGAG |
| ENSG00000157064 | UCUAGAG |
| ENSG00000157064 | UCUCCAA |
| ENSG00000157064 | UGAAAUG |
| ENSG00000157064 | UGACUGU |
| ENSG00000157077 | AGCUGCC |
| ENSG00000157077 | AGUAACA |
| ENSG00000157077 | GUAACAG |
| ENSG00000157077 | GUGCAA  |
| ENSG00000157077 | UGCAUAG |
| ENSG00000157087 | AAAGUGC |
| ENSG00000157087 | AAGUGCU |
| ENSG00000157087 | AAUUAUU |
| ENSG00000157087 | ACAGGUG |
| ENSG00000157087 | AGUGCUG |
| ENSG00000157087 | AUGGCUU |
| ENSG00000157087 | CAAAGUG |
| ENSG00000157087 | CUCUGGG |

|                 |          |
|-----------------|----------|
| ENSG00000157087 | GGAAGAC  |
| ENSG00000157087 | GGAAGCC  |
| ENSG00000157087 | GUGACUG  |
| ENSG00000157087 | UCAUUCG  |
| ENSG00000157087 | UCUCACC  |
| ENSG00000157087 | UGUCUUU  |
| ENSG00000157087 | UUGUGAC  |
| ENSG00000157087 | UUUGCAA  |
| ENSG00000157093 | UUCUGCA  |
| ENSG00000157103 | AAAAACC  |
| ENSG00000157103 | AAAAAUC  |
| ENSG00000157103 | AAACUGU  |
| ENSG00000157103 | ACUGCAU  |
| ENSG00000157103 | ACUGUAG  |
| ENSG00000157103 | AGCUGCC  |
| ENSG00000157103 | AUAUUAU  |
| ENSG00000157103 | CUACAAA  |
| ENSG00000157103 | GAGGUAG  |
| ENSG00000157103 | UAAUACA  |
| ENSG00000157103 | UAUAAAAG |
| ENSG00000157103 | UAUAUGA  |
| ENSG00000157103 | UCACACA  |
| ENSG00000157103 | UCACAGG  |
| ENSG00000157103 | UCAUAGA  |
| ENSG00000157103 | UCAUUUG  |
| ENSG00000157106 | AAACUGU  |
| ENSG00000157106 | AAAGGUA  |
| ENSG00000157106 | AAAGUAU  |
| ENSG00000157106 | AAUCACU  |
| ENSG00000157106 | AAUCCUU  |
| ENSG00000157106 | ACAUCAC  |
| ENSG00000157106 | AUCCCUU  |
| ENSG00000157106 | AUCCUUG  |
| ENSG00000157106 | AUUCAUU  |
| ENSG00000157106 | CAAGAGC  |
| ENSG00000157106 | CACAGGG  |
| ENSG00000157106 | CACAGUG  |
| ENSG00000157106 | CAGGUGA  |
| ENSG00000157106 | CUGGAAA  |
| ENSG00000157106 | GACCCUG  |
| ENSG00000157106 | GCCCUGU  |
| ENSG00000157106 | GCCUGAU  |
| ENSG00000157106 | GGAAGAC  |
| ENSG00000157106 | GGAAUGU  |
| ENSG00000157106 | GGGCGUA  |
| ENSG00000157106 | GUCUUGC  |
| ENSG00000157106 | GUGUGGC  |
| ENSG00000157106 | UCACCAC  |
| ENSG00000157106 | UGCAGCU  |
| ENSG00000157106 | UGCAUUG  |
| ENSG00000157106 | UGCCUG   |
| ENSG00000157106 | UUCCUCG  |
| ENSG00000157107 | AACCUGG  |
| ENSG00000157107 | AAGGCAC  |
| ENSG00000157107 | AAGUGCA  |
| ENSG00000157107 | ACUGCAG  |
| ENSG00000157107 | AUAUUAU  |
| ENSG00000157107 | AUUGCAC  |
| ENSG00000157107 | CAAAGCA  |
| ENSG00000157107 | CUACAGU  |
| ENSG00000157107 | GCUGUCU  |
| ENSG00000157107 | UAUUGCU  |
| ENSG00000157110 | AAAAAUC  |
| ENSG00000157110 | AAAAGUA  |

|                 |          |
|-----------------|----------|
| ENSG00000157110 | AAAGUAC  |
| ENSG00000157110 | AAGUCUU  |
| ENSG00000157110 | ACACACC  |
| ENSG00000157110 | AGCAUUC  |
| ENSG00000157110 | CAAAACU  |
| ENSG00000157110 | CACACCU  |
| ENSG00000157110 | CCAGUGU  |
| ENSG00000157110 | GACCAUG  |
| ENSG00000157110 | GAGGCUG  |
| ENSG00000157110 | GAUUGUC  |
| ENSG00000157110 | GUCUUGC  |
| ENSG00000157110 | UAAUACA  |
| ENSG00000157110 | UAUAAAAG |
| ENSG00000157110 | UCACACA  |
| ENSG00000157110 | UCCAGUU  |
| ENSG00000157110 | UGAUCCA  |
| ENSG00000157110 | UUCAAGC  |
| ENSG00000157150 | ACUGGCU  |
| ENSG00000157152 | ACUGCAU  |
| ENSG00000157152 | AUAUAAC  |
| ENSG00000157152 | CAGACAG  |
| ENSG00000157152 | CAGUCCA  |
| ENSG00000157152 | CUGUUGA  |
| ENSG00000157152 | GAGAACU  |
| ENSG00000157152 | GUAAACA  |
| ENSG00000157152 | UAUUGCU  |
| ENSG00000157152 | UGCAUAG  |
| ENSG00000157152 | UUCAAAU  |
| ENSG00000157168 | GGAUUUC  |
| ENSG00000157184 | AGCACCA  |
| ENSG00000157184 | UGGCUGC  |
| ENSG00000157184 | UUCUGCA  |
| ENSG00000157193 | AUCCUUU  |
| ENSG00000157193 | CAGCAGA  |
| ENSG00000157193 | CAGCAGG  |
| ENSG00000157193 | GUUAAUG  |
| ENSG00000157214 | AAGGCAC  |
| ENSG00000157214 | UGAGAAU  |
| ENSG00000157216 | AAAAAUC  |
| ENSG00000157216 | AAACUGU  |
| ENSG00000157216 | AUUGCAC  |
| ENSG00000157216 | UAUUGCU  |
| ENSG00000157216 | UCCAGUU  |
| ENSG00000157216 | UGAAAUG  |
| ENSG00000157216 | UGCAUAG  |
| ENSG00000157216 | UGCAUUA  |
| ENSG00000157219 | AUGCAUU  |
| ENSG00000157224 | AAUCCUU  |
| ENSG00000157224 | AGCAGCG  |
| ENSG00000157224 | GAGGUUAU |
| ENSG00000157227 | AAAAAUC  |
| ENSG00000157227 | AAUUAUU  |
| ENSG00000157227 | ACAUUAC  |
| ENSG00000157227 | ACAUUCA  |
| ENSG00000157227 | AUAUAAC  |
| ENSG00000157227 | GAGGCUG  |
| ENSG00000157227 | GGCUCAG  |
| ENSG00000157227 | UCAAGUA  |
| ENSG00000157227 | UCCUGAG  |
| ENSG00000157227 | UGCCAGC  |
| ENSG00000157227 | UUGGUCC  |
| ENSG00000157240 | AUAUAAC  |
| ENSG00000157240 | AUGAGCU  |
| ENSG00000157240 | CAGGUGA  |

|                 |         |
|-----------------|---------|
| ENSG00000157240 | CUUACAG |
| ENSG00000157240 | UACAAAG |
| ENSG00000157240 | UCCAUUA |
| ENSG00000157259 | AAAGUAA |
| ENSG00000157259 | UCUAGAG |
| ENSG00000157306 | AAAUCCC |
| ENSG00000157306 | AACUACU |
| ENSG00000157306 | ACUCAGC |
| ENSG00000157306 | AGGAGCU |
| ENSG00000157306 | AGGGAGG |
| ENSG00000157306 | CAGCUGG |
| ENSG00000157306 | GAGGCUG |
| ENSG00000157306 | GAGGGGC |
| ENSG00000157306 | GGAGAGA |
| ENSG00000157306 | GGAGGCA |
| ENSG00000157306 | GGAUUUU |
| ENSG00000157306 | GUGCUUG |
| ENSG00000157306 | UCCUAUA |
| ENSG00000157306 | UGUGCUU |
| ENSG00000157349 | GAGGUAU |
| ENSG00000157350 | AAUACUG |
| ENSG00000157350 | AAUUAUU |
| ENSG00000157350 | ACUGUUU |
| ENSG00000157350 | CUCUCC  |
| ENSG00000157350 | CUGCAGC |
| ENSG00000157350 | CUUUGGU |
| ENSG00000157350 | GAUUGGU |
| ENSG00000157350 | GCAGCAU |
| ENSG00000157350 | GCUUCCU |
| ENSG00000157350 | GGCAAGA |
| ENSG00000157350 | UCACAGG |
| ENSG00000157350 | UCACAGU |
| ENSG00000157350 | UUGGAGG |
| ENSG00000157350 | UUGGCAA |
| ENSG00000157350 | UUGGCAC |
| ENSG00000157353 | GAGAACC |
| ENSG00000157353 | GCUUCCU |
| ENSG00000157368 | UAAUAGU |
| ENSG00000157379 | CUUCUCU |
| ENSG00000157388 | AGUGCCG |
| ENSG00000157388 | GAGGCAG |
| ENSG00000157388 | GAGGUAG |
| ENSG00000157388 | GAGGUAU |
| ENSG00000157388 | GAUAUGU |
| ENSG00000157388 | UUGAGGC |
| ENSG00000157404 | AAAGUUU |
| ENSG00000157404 | AAGACAU |
| ENSG00000157404 | AAGGUGC |
| ENSG00000157404 | AAGUGCA |
| ENSG00000157404 | ACUGGCC |
| ENSG00000157404 | ACUGGCU |
| ENSG00000157404 | ACUGUAG |
| ENSG00000157404 | ACUGUUU |
| ENSG00000157404 | AGUGCAA |
| ENSG00000157404 | AUAAAGU |
| ENSG00000157404 | AUAUAAC |
| ENSG00000157404 | AUCCUUU |
| ENSG00000157404 | CAAAACU |
| ENSG00000157404 | CAGUGCA |
| ENSG00000157404 | CCAGUGU |
| ENSG00000157404 | GUGCAAA |
| ENSG00000157404 | GUGCUUG |
| ENSG00000157404 | UACAAAG |
| ENSG00000157404 | UAUAAAG |



|                 |         |
|-----------------|---------|
| ENSG00000157404 | UGCAAAG |
| ENSG00000157404 | UGUGCUU |
| ENSG00000157404 | UUCAAAU |
| ENSG00000157423 | AAUCCUU |
| ENSG00000157445 | AAAAGUA |
| ENSG00000157450 | AGCAAAA |
| ENSG00000157450 | AGCAGCA |
| ENSG00000157450 | AGCAGCU |
| ENSG00000157450 | AUACAAG |
| ENSG00000157450 | AUGUGCC |
| ENSG00000157450 | CAAAGCA |
| ENSG00000157450 | CAGCAAA |
| ENSG00000157450 | GGAAUGU |
| ENSG00000157450 | UACAAAG |
| ENSG00000157450 | UCACAGG |
| ENSG00000157450 | UCACAGU |
| ENSG00000157450 | UGCAAAG |
| ENSG00000157450 | UUGGUUC |
| ENSG00000157470 | AAAAGUA |
| ENSG00000157470 | AAAUUUC |
| ENSG00000157470 | AAGGCAC |
| ENSG00000157470 | AUUCAUU |
| ENSG00000157470 | AUUGCAC |
| ENSG00000157470 | CUUUGGU |
| ENSG00000157470 | GCAGCAU |
| ENSG00000157470 | UAUUGCU |
| ENSG00000157470 | UCACAGU |
| ENSG00000157470 | UGCAAAG |
| ENSG00000157470 | UUCAAAU |
| ENSG00000157470 | UUGGCAA |
| ENSG00000157470 | UUGGCAC |
| ENSG00000157483 | AAGGCAC |
| ENSG00000157483 | ACAGUAC |
| ENSG00000157483 | ACCUGGA |
| ENSG00000157483 | UAUAUGA |
| ENSG00000157500 | AAUACUG |
| ENSG00000157500 | AAUCCUU |
| ENSG00000157500 | ACAAUUA |
| ENSG00000157500 | AGCAAAA |
| ENSG00000157500 | AUACAAG |
| ENSG00000157500 | CAGCAAA |
| ENSG00000157500 | CUGCAGG |
| ENSG00000157500 | GAGAACC |
| ENSG00000157500 | GCAGAAG |
| ENSG00000157500 | GCAGCAU |
| ENSG00000157500 | GUGCAAA |
| ENSG00000157500 | UUGGCAA |
| ENSG00000157500 | UUGGCAC |
| ENSG00000157502 | AGUGCUU |
| ENSG00000157502 | CAGCAGA |
| ENSG00000157502 | GCAGAAG |
| ENSG00000157502 | GGAAUGU |
| ENSG00000157502 | UCAACAG |
| ENSG00000157502 | UCAAGUA |
| ENSG00000157510 | AGGCAGG |
| ENSG00000157510 | GAGCUAA |
| ENSG00000157510 | GGCAGGG |
| ENSG00000157514 | AAAGCUG |
| ENSG00000157514 | AACAAAC |
| ENSG00000157514 | AAUCUCU |
| ENSG00000157514 | ACUCAGC |
| ENSG00000157514 | AGCACCA |
| ENSG00000157514 | AUGCAUU |
| ENSG00000157514 | CACCAGC |

|                 |         |
|-----------------|---------|
| ENSG00000157514 | CUGCCCC |
| ENSG00000157514 | CUGGAAA |
| ENSG00000157514 | GAGAAGA |
| ENSG00000157514 | GAGACCU |
| ENSG00000157514 | GCUACAU |
| ENSG00000157514 | GGCUCAG |
| ENSG00000157514 | GGCUCUG |
| ENSG00000157514 | UCCAGAG |
| ENSG00000157514 | UCCACA  |
| ENSG00000157514 | UGAAGCU |
| ENSG00000157514 | UUGGCAC |
| ENSG00000157540 | AAAGUGC |
| ENSG00000157540 | AACAAAC |
| ENSG00000157540 | AAGACAU |
| ENSG00000157540 | AAGGCAC |
| ENSG00000157540 | AAGUGCA |
| ENSG00000157540 | AAUUAUU |
| ENSG00000157540 | ACAGUAC |
| ENSG00000157540 | ACAGUAU |
| ENSG00000157540 | ACAUUAC |
| ENSG00000157540 | ACCAGCA |
| ENSG00000157540 | ACCCAUU |
| ENSG00000157540 | ACUAGAU |
| ENSG00000157540 | ACUGCAU |
| ENSG00000157540 | ACUGGCC |
| ENSG00000157540 | AGCAAAA |
| ENSG00000157540 | AGCAGCU |
| ENSG00000157540 | AGGUUAU |
| ENSG00000157540 | AGUACUG |
| ENSG00000157540 | AUGACAC |
| ENSG00000157540 | AUGUGCC |
| ENSG00000157540 | CAAACU  |
| ENSG00000157540 | CAAAGCA |
| ENSG00000157540 | CAAAGUG |
| ENSG00000157540 | CAGUGCA |
| ENSG00000157540 | CCUGUAC |
| ENSG00000157540 | CUCCAA  |
| ENSG00000157540 | CUGGACU |
| ENSG00000157540 | CUUACAG |
| ENSG00000157540 | CUUGUGU |
| ENSG00000157540 | CUUUGGU |
| ENSG00000157540 | GAGGCAG |
| ENSG00000157540 | GAGGUAG |
| ENSG00000157540 | GCUACAU |
| ENSG00000157540 | GGACCUG |
| ENSG00000157540 | GGACUGC |
| ENSG00000157540 | GGUCUAG |
| ENSG00000157540 | GGUUACC |
| ENSG00000157540 | GUGAGGU |
| ENSG00000157540 | GUGCUUG |
| ENSG00000157540 | UAAUACA |
| ENSG00000157540 | UACAGUU |
| ENSG00000157540 | UAUAAUA |
| ENSG00000157540 | UCAAGUA |
| ENSG00000157540 | UCACAGG |
| ENSG00000157540 | UCACAGU |
| ENSG00000157540 | UCCAGUU |
| ENSG00000157540 | UGAAAUG |
| ENSG00000157540 | UGAGGAC |
| ENSG00000157540 | UGGACUG |
| ENSG00000157540 | UGGUACC |
| ENSG00000157540 | UGUGUCA |
| ENSG00000157540 | UUGUGUC |
| ENSG00000157540 | UUUGCAA |

|                 |         |
|-----------------|---------|
| ENSG00000157554 | AAAACUG |
| ENSG00000157554 | CACAGUG |
| ENSG00000157554 | GAUUGUC |
| ENSG00000157554 | GUAGUGU |
| ENSG00000157554 | UCACAGG |
| ENSG00000157557 | AAAAAUC |
| ENSG00000157557 | AAAGCUG |
| ENSG00000157557 | AAAUCCC |
| ENSG00000157557 | AAUACUG |
| ENSG00000157557 | AGCUGCC |
| ENSG00000157557 | CAAGAGC |
| ENSG00000157557 | CCAGUGC |
| ENSG00000157557 | CCAGUGU |
| ENSG00000157557 | CUUACAG |
| ENSG00000157557 | GAAAACA |
| ENSG00000157557 | UCCAGUU |
| ENSG00000157557 | UGAAAUG |
| ENSG00000157557 | UGCAUUG |
| ENSG00000157557 | UGCCAGC |
| ENSG00000157557 | UUUGCAC |
| ENSG00000157593 | AAGGCAC |
| ENSG00000157593 | AGCAGCA |
| ENSG00000157593 | CCAGGAG |
| ENSG00000157593 | GUGCUUG |
| ENSG00000157613 | AGUGGUU |
| ENSG00000157613 | GGCAGUG |
| ENSG00000157613 | GGGUCUU |
| ENSG00000157613 | GUCUCUG |
| ENSG00000157613 | UACAAAG |
| ENSG00000157617 | AAAGUAA |
| ENSG00000157617 | ACAGUAU |
| ENSG00000157617 | AUAAAGU |
| ENSG00000157617 | AUGCAUU |
| ENSG00000157617 | AUGGCUU |
| ENSG00000157617 | CAAAGUG |
| ENSG00000157617 | CUUUGGU |
| ENSG00000157617 | GUUCAUG |
| ENSG00000157617 | UAAGACU |
| ENSG00000157617 | UAAUAUC |
| ENSG00000157617 | UAUUGCU |
| ENSG00000157617 | UCACAGG |
| ENSG00000157617 | UGCAUAG |
| ENSG00000157617 | UUGGCAA |
| ENSG00000157654 | AAAAAUC |
| ENSG00000157654 | AAAGCUG |
| ENSG00000157654 | AACAUUC |
| ENSG00000157654 | AAUACUG |
| ENSG00000157654 | ACACACC |
| ENSG00000157654 | ACUGCAU |
| ENSG00000157654 | AUCCCUU |
| ENSG00000157654 | AUGGCUU |
| ENSG00000157654 | CAAAACU |
| ENSG00000157654 | CACUCCU |
| ENSG00000157654 | CAGCAAA |
| ENSG00000157654 | CAUAUUG |
| ENSG00000157654 | CCAUUAC |
| ENSG00000157654 | GAGAAAU |
| ENSG00000157654 | GCAGCAU |
| ENSG00000157654 | GGCAGCG |
| ENSG00000157654 | GGUCUAG |
| ENSG00000157654 | GUGACUG |
| ENSG00000157654 | UACAAAG |
| ENSG00000157654 | UAGUGAG |
| ENSG00000157654 | UCUGGAA |

|                 |         |
|-----------------|---------|
| ENSG00000157654 | UGGCUGC |
| ENSG00000157654 | UUAGGAU |
| ENSG00000157657 | AAAAACC |
| ENSG00000157657 | AAAGGUA |
| ENSG00000157657 | AAAGUAU |
| ENSG00000157657 | AAAGUGC |
| ENSG00000157657 | AAAUGGU |
| ENSG00000157657 | AAGGCAC |
| ENSG00000157657 | AAGGUGC |
| ENSG00000157657 | AAGUCAC |
| ENSG00000157657 | AAGUGCA |
| ENSG00000157657 | AAUGCCC |
| ENSG00000157657 | ACAGUAU |
| ENSG00000157657 | ACAUUCA |
| ENSG00000157657 | ACUGGCC |
| ENSG00000157657 | AGCAAAA |
| ENSG00000157657 | AGCAGCU |
| ENSG00000157657 | AGCUGCC |
| ENSG00000157657 | AGUGCCU |
| ENSG00000157657 | AGUGCUU |
| ENSG00000157657 | AUAUUAU |
| ENSG00000157657 | AUGAGCU |
| ENSG00000157657 | CACACCU |
| ENSG00000157657 | CACAGGG |
| ENSG00000157657 | CAGACAG |
| ENSG00000157657 | CAGCUGG |
| ENSG00000157657 | CAGUGCA |
| ENSG00000157657 | CCAGGAG |
| ENSG00000157657 | CCAGUGU |
| ENSG00000157657 | CCUGAG  |
| ENSG00000157657 | CUACAAA |
| ENSG00000157657 | CUUUGGU |
| ENSG00000157657 | GAAGGUC |
| ENSG00000157657 | GAGAUGA |
| ENSG00000157657 | GAGCUAA |
| ENSG00000157657 | GAGGUAU |
| ENSG00000157657 | GAGUCUU |
| ENSG00000157657 | GCAGAAG |
| ENSG00000157657 | GCCCUGU |
| ENSG00000157657 | GCCUGAU |
| ENSG00000157657 | GCUACAU |
| ENSG00000157657 | GGACCUG |
| ENSG00000157657 | GGCCUG  |
| ENSG00000157657 | GUAGUGU |
| ENSG00000157657 | GUGACUG |
| ENSG00000157657 | UAAUACA |
| ENSG00000157657 | UACAGUU |
| ENSG00000157657 | UAUAAAG |
| ENSG00000157657 | UAUUACC |
| ENSG00000157657 | UCACCAC |
| ENSG00000157657 | UCCUCU  |
| ENSG00000157657 | UCCUGAG |
| ENSG00000157657 | UCUCAAG |
| ENSG00000157657 | UGCCUG  |
| ENSG00000157657 | UGGCUGC |
| ENSG00000157657 | UUGGUUC |
| ENSG00000157657 | UUGUGUC |
| ENSG00000157680 | AGCUGCC |
| ENSG00000157680 | AGGCAGG |
| ENSG00000157680 | CAGGUGA |
| ENSG00000157680 | CAGUAGA |
| ENSG00000157680 | CUCCAUI |
| ENSG00000157680 | GAGCUGC |
| ENSG00000157680 | GCCCUUA |

|                 |          |
|-----------------|----------|
| ENSG00000157680 | GCUGGAU  |
| ENSG00000157680 | GGAAGCC  |
| ENSG00000157680 | GGAGAGA  |
| ENSG00000157680 | GUUCAUG  |
| ENSG00000157693 | CAAAGCA  |
| ENSG00000157693 | CUUCUCU  |
| ENSG00000157693 | UCACAGG  |
| ENSG00000157693 | UCACAGU  |
| ENSG00000157734 | ACUGGCC  |
| ENSG00000157734 | GUAACAG  |
| ENSG00000157734 | UCACAUU  |
| ENSG00000157765 | AAGGCAC  |
| ENSG00000157766 | AAGGCAC  |
| ENSG00000157766 | ACAUUCA  |
| ENSG00000157766 | AUGUGGG  |
| ENSG00000157766 | CAGGAAC  |
| ENSG00000157766 | UGUCUUU  |
| ENSG00000157766 | UUCAAAU  |
| ENSG00000157766 | UUUCAAC  |
| ENSG00000157782 | AGGCAGG  |
| ENSG00000157782 | CACAGUG  |
| ENSG00000157782 | GCAGGAC  |
| ENSG00000157782 | GCGGAGG  |
| ENSG00000157782 | GGCGCCU  |
| ENSG00000157782 | GGGGUGG  |
| ENSG00000157782 | GGUGGGC  |
| ENSG00000157782 | UCACAGG  |
| ENSG00000157782 | UCACAGU  |
| ENSG00000157782 | UCCAGUU  |
| ENSG00000157796 | AAUUUUA  |
| ENSG00000157800 | GGAAUGU  |
| ENSG00000157827 | AAGGCAC  |
| ENSG00000157827 | AUACAAG  |
| ENSG00000157827 | AUAU AAC |
| ENSG00000157827 | CUAUACA  |
| ENSG00000157827 | GAUUGUA  |
| ENSG00000157827 | UAUUACC  |
| ENSG00000157827 | UUGGUUC  |
| ENSG00000157851 | AAGUGCU  |
| ENSG00000157851 | AGUGCCU  |
| ENSG00000157851 | AUGCAUU  |
| ENSG00000157851 | CAAAGUG  |
| ENSG00000157851 | GGAGGAG  |
| ENSG00000157851 | GUGCAA   |
| ENSG00000157851 | UGCAUAG  |
| ENSG00000157869 | UGUGUGG  |
| ENSG00000157890 | AAAGCUG  |
| ENSG00000157890 | AUAUU AU |
| ENSG00000157890 | AUCCCUU  |
| ENSG00000157890 | CACAGUG  |
| ENSG00000157890 | GAGGUAG  |
| ENSG00000157890 | GAGGU AU |
| ENSG00000157890 | GCUUCCU  |
| ENSG00000157890 | UACAAAG  |
| ENSG00000157890 | UAUUGCU  |
| ENSG00000157890 | UCAAGUA  |
| ENSG00000157890 | UCAUAGA  |
| ENSG00000157890 | UCCAGUU  |
| ENSG00000157890 | UGAAAGG  |
| ENSG00000157890 | UGAGAAU  |
| ENSG00000157890 | UGCCCUG  |
| ENSG00000157890 | UUCUUGU  |
| ENSG00000157895 | AGGGAGG  |
| ENSG00000157895 | GCCCUGU  |

|                 |         |
|-----------------|---------|
| ENSG00000157895 | UCUGGAA |
| ENSG00000157916 | AACUACU |
| ENSG00000157916 | AUAAUAC |
| ENSG00000157916 | CAGUCCA |
| ENSG00000157916 | GAGUAUU |
| ENSG00000157916 | GGCUCAG |
| ENSG00000157916 | GGUUUAC |
| ENSG00000157916 | GUGUCAC |
| ENSG00000157916 | UACAAAG |
| ENSG00000157916 | UGAGUCU |
| ENSG00000157916 | UGUGUCA |
| ENSG00000157916 | UUGGUUC |
| ENSG00000157933 | AAAGUGC |
| ENSG00000157933 | AACAAAC |
| ENSG00000157933 | AAGGCAC |
| ENSG00000157933 | AAGUGCA |
| ENSG00000157933 | AGCACCA |
| ENSG00000157933 | AUGGCUU |
| ENSG00000157933 | CAAAGUG |
| ENSG00000157933 | CAGUAGA |
| ENSG00000157933 | CUGCAGC |
| ENSG00000157933 | UAAUGCU |
| ENSG00000157933 | UGUGCUU |
| ENSG00000157933 | UUGUUCG |
| ENSG00000157954 | AAAGAAU |
| ENSG00000157954 | AAAUCCC |
| ENSG00000157954 | AAAUGGU |
| ENSG00000157954 | AAGGCAC |
| ENSG00000157954 | AAUUUUA |
| ENSG00000157954 | AGCAGCG |
| ENSG00000157954 | AGCAGCU |
| ENSG00000157954 | AGCCAGU |
| ENSG00000157954 | CAAAGUG |
| ENSG00000157954 | CACAGGG |
| ENSG00000157954 | CCAGUGU |
| ENSG00000157954 | CGAGGAG |
| ENSG00000157954 | CUUCACC |
| ENSG00000157954 | CUUUGGU |
| ENSG00000157954 | GAGGUAU |
| ENSG00000157954 | GGAAUGU |
| ENSG00000157954 | GUCUCUG |
| ENSG00000157954 | UCACAGG |
| ENSG00000157954 | UCACCAC |
| ENSG00000157954 | UCAUAGA |
| ENSG00000157954 | UGCAAAG |
| ENSG00000157954 | UGUGCUU |
| ENSG00000157978 | AAGGCAC |
| ENSG00000157978 | AGCACCA |
| ENSG00000157978 | GAAACAU |
| ENSG00000157978 | UUCAAAU |
| ENSG00000157992 | UAUUACC |
| ENSG00000158006 | AGCAAAA |
| ENSG00000158006 | GAGUAUU |
| ENSG00000158006 | GUCUGCC |
| ENSG00000158008 | AGUGGUU |
| ENSG00000158008 | GAUUGGU |
| ENSG00000158014 | UCACACA |
| ENSG00000158019 | CCAGGAG |
| ENSG00000158019 | GGAGAGA |
| ENSG00000158019 | UGCUGAC |
| ENSG00000158019 | UGGAGAU |
| ENSG00000158022 | UUUGCAA |
| ENSG00000158042 | CCAGGAG |
| ENSG00000158042 | GGAUUUC |

|                 |          |
|-----------------|----------|
| ENSG00000158050 | AGCACCA  |
| ENSG00000158050 | CACAGGG  |
| ENSG00000158050 | GCAGAAG  |
| ENSG00000158050 | GGAGUGU  |
| ENSG00000158050 | GGUUGUC  |
| ENSG00000158050 | UAUAAAAG |
| ENSG00000158055 | AAUGUUG  |
| ENSG00000158055 | AGUAACA  |
| ENSG00000158055 | GUGUGGC  |
| ENSG00000158055 | UAUUACC  |
| ENSG00000158055 | UGCAUAG  |
| ENSG00000158055 | UUUUUGC  |
| ENSG00000158079 | AUGGCAC  |
| ENSG00000158079 | UAAGACG  |
| ENSG00000158079 | UAAGACU  |
| ENSG00000158092 | CAGUCUG  |
| ENSG00000158104 | GGGCGUG  |
| ENSG00000158106 | CCCCUGG  |
| ENSG00000158106 | CUGGGGG  |
| ENSG00000158109 | AAGUGCA  |
| ENSG00000158109 | GUGCAA   |
| ENSG00000158109 | UGCAAAG  |
| ENSG00000158125 | AACUGGU  |
| ENSG00000158125 | GAGAACC  |
| ENSG00000158125 | UCAUUUG  |
| ENSG00000158156 | AGCUUUAU |
| ENSG00000158156 | GAGGUUAU |
| ENSG00000158158 | ACCCAUU  |
| ENSG00000158158 | AGCAAAA  |
| ENSG00000158158 | AUACAAG  |
| ENSG00000158158 | AUUGCAC  |
| ENSG00000158158 | CAAAACU  |
| ENSG00000158158 | CAGGAAC  |
| ENSG00000158158 | CUUUGGU  |
| ENSG00000158158 | GACCCUG  |
| ENSG00000158158 | GCUUCCU  |
| ENSG00000158158 | GGAAGAC  |
| ENSG00000158158 | GGGCCCC  |
| ENSG00000158158 | GGGGAGC  |
| ENSG00000158158 | GUGACAG  |
| ENSG00000158158 | UUGGUCC  |
| ENSG00000158161 | AGGAGCU  |
| ENSG00000158161 | UCCAGUU  |
| ENSG00000158163 | AUAAUAC  |
| ENSG00000158163 | UCUCAAG  |
| ENSG00000158186 | AAAUGGU  |
| ENSG00000158186 | ACACACC  |
| ENSG00000158186 | AUGGCUU  |
| ENSG00000158186 | CAGCAA   |
| ENSG00000158186 | GCUGGUG  |
| ENSG00000158186 | GGAAUGU  |
| ENSG00000158186 | UCCAGAG  |
| ENSG00000158186 | UGCAAAG  |
| ENSG00000158186 | UUGGCAA  |
| ENSG00000158186 | UUUGCAA  |
| ENSG00000158195 | AAUCCUU  |
| ENSG00000158195 | AGCACCA  |
| ENSG00000158195 | CCCCCAG  |
| ENSG00000158195 | CUACAAA  |
| ENSG00000158195 | CUGCCCC  |
| ENSG00000158195 | GAGAACC  |
| ENSG00000158195 | GAGAACU  |
| ENSG00000158195 | GCUACAU  |
| ENSG00000158195 | GGAUGAG  |

|                 |          |
|-----------------|----------|
| ENSG00000158195 | GGCUGCG  |
| ENSG00000158195 | UACAAAG  |
| ENSG00000158195 | UUGGCAA  |
| ENSG00000158195 | UUGGCAC  |
| ENSG00000158195 | UUGGUCC  |
| ENSG00000158195 | UUGGUUC  |
| ENSG00000158201 | CUACAAA  |
| ENSG00000158201 | UUGGUUC  |
| ENSG00000158246 | CAAAGUG  |
| ENSG00000158246 | GUGCAAA  |
| ENSG00000158258 | CACAGUG  |
| ENSG00000158258 | UACAAAG  |
| ENSG00000158258 | UGGAGAU  |
| ENSG00000158270 | ACUGUUU  |
| ENSG00000158270 | AUAUUAU  |
| ENSG00000158270 | CAGUGCA  |
| ENSG00000158270 | GGAUUUU  |
| ENSG00000158270 | UGGGAUC  |
| ENSG00000158286 | GAUUGUA  |
| ENSG00000158286 | UCACAGG  |
| ENSG00000158286 | UCACAGU  |
| ENSG00000158290 | AACACUG  |
| ENSG00000158290 | ACAGUAU  |
| ENSG00000158290 | GGUGGUU  |
| ENSG00000158290 | UGGAGAU  |
| ENSG00000158292 | CUUUGGU  |
| ENSG00000158292 | GUGCUUG  |
| ENSG00000158292 | UGUGCUU  |
| ENSG00000158296 | AGCAGCG  |
| ENSG00000158296 | AGCAGCU  |
| ENSG00000158301 | CUUUGGU  |
| ENSG00000158301 | GAGAACC  |
| ENSG00000158301 | GGUGGUU  |
| ENSG00000158301 | UUGGCAA  |
| ENSG00000158301 | UUGGCAC  |
| ENSG00000158321 | AAAGCUG  |
| ENSG00000158321 | AAUACUG  |
| ENSG00000158321 | AGCAAAA  |
| ENSG00000158321 | AUGGCAC  |
| ENSG00000158321 | CAGCAAA  |
| ENSG00000158321 | UAUAUGA  |
| ENSG00000158352 | AACACUG  |
| ENSG00000158352 | AAGGCAC  |
| ENSG00000158352 | ACUCAGC  |
| ENSG00000158352 | AGCACCA  |
| ENSG00000158352 | AGGACAC  |
| ENSG00000158352 | CUACAGU  |
| ENSG00000158352 | GAGCUGC  |
| ENSG00000158352 | GGAGGAG  |
| ENSG00000158352 | UAGAGGA  |
| ENSG00000158352 | UGCAAAG  |
| ENSG00000158352 | UGCAGCU  |
| ENSG00000158402 | CUGCUC A |
| ENSG00000158406 | GGCCUG   |
| ENSG00000158417 | AAUACUG  |
| ENSG00000158417 | CAUGGAU  |
| ENSG00000158417 | CCAGUGU  |
| ENSG00000158423 | UUGUUCG  |
| ENSG00000158435 | AAGGCAC  |
| ENSG00000158435 | CACUGUU  |
| ENSG00000158445 | GCAACUU  |
| ENSG00000158445 | GCAGAAG  |
| ENSG00000158457 | CUGGCUC  |
| ENSG00000158457 | GUAACA   |



|                 |         |
|-----------------|---------|
| ENSG00000158457 | GUCAACA |
| ENSG00000158457 | UAUUGCU |
| ENSG00000158457 | UCCAUA  |
| ENSG00000158458 | AAAAAUC |
| ENSG00000158467 | AAUCACU |
| ENSG00000158467 | ACCACAG |
| ENSG00000158467 | ACUAGAU |
| ENSG00000158467 | AGCAGCU |
| ENSG00000158467 | CAGGAAC |
| ENSG00000158467 | CUCUGGG |
| ENSG00000158467 | GGAGGCA |
| ENSG00000158467 | GGCAGUG |
| ENSG00000158467 | GGGGAGC |
| ENSG00000158467 | GGGUAAG |
| ENSG00000158467 | UCCUGAG |
| ENSG00000158470 | AAAUUUC |
| ENSG00000158470 | AAUCACU |
| ENSG00000158470 | ACAAUUA |
| ENSG00000158470 | AGCUGCC |
| ENSG00000158470 | AGUGCAA |
| ENSG00000158470 | AUAUAAC |
| ENSG00000158470 | AUGAGCU |
| ENSG00000158470 | AUGGCUU |
| ENSG00000158470 | AUGUAAU |
| ENSG00000158470 | CCCCUGG |
| ENSG00000158470 | CUCCAC  |
| ENSG00000158470 | GCCUGU  |
| ENSG00000158470 | GUAACA  |
| ENSG00000158470 | GUGCAA  |
| ENSG00000158470 | GUGGGGA |
| ENSG00000158470 | UAUUGCU |
| ENSG00000158470 | UCCACA  |
| ENSG00000158470 | UCUUGAG |
| ENSG00000158470 | UGUGCGU |
| ENSG00000158480 | AAAAAUC |
| ENSG00000158480 | ACAGUAC |
| ENSG00000158480 | ACAGUAU |
| ENSG00000158480 | AGCCCUU |
| ENSG00000158480 | CAAAGCA |
| ENSG00000158480 | CCUUCUG |
| ENSG00000158480 | CUCUAGC |
| ENSG00000158480 | GAGGUAG |
| ENSG00000158480 | GUGUGGC |
| ENSG00000158480 | UCACAGU |
| ENSG00000158483 | GAUGAG  |
| ENSG00000158526 | CUGGGCA |
| ENSG00000158528 | AAGUGCU |
| ENSG00000158528 | AAUCACU |
| ENSG00000158528 | AAUCCUU |
| ENSG00000158528 | AAUUUUA |
| ENSG00000158528 | AUAUAAC |
| ENSG00000158528 | CACAGGG |
| ENSG00000158528 | CACAGUG |
| ENSG00000158528 | CCAGUGC |
| ENSG00000158528 | GAUUGGU |
| ENSG00000158528 | UAUUGCU |
| ENSG00000158528 | UCACACA |
| ENSG00000158528 | UGCAUUG |
| ENSG00000158545 | AAAGAAU |
| ENSG00000158545 | GAGAAAU |
| ENSG00000158545 | UGGCUGC |
| ENSG00000158555 | CUCCAGC |
| ENSG00000158555 | CUGCAGG |
| ENSG00000158555 | GCCUGU  |

|                 |          |
|-----------------|----------|
| ENSG00000158555 | GGCAGCG  |
| ENSG00000158555 | GGCUCAG  |
| ENSG00000158555 | GUGCUUG  |
| ENSG00000158555 | UGUGCUU  |
| ENSG00000158578 | CAGCUGG  |
| ENSG00000158615 | AACACUG  |
| ENSG00000158615 | AACCUGG  |
| ENSG00000158615 | AAGUGCA  |
| ENSG00000158615 | AAUUGCU  |
| ENSG00000158615 | ACCUGGA  |
| ENSG00000158615 | AGCUGCC  |
| ENSG00000158615 | AGUGCUG  |
| ENSG00000158615 | GAGGUAU  |
| ENSG00000158615 | GUGACAG  |
| ENSG00000158615 | UCAAGUA  |
| ENSG00000158636 | AAGUGCA  |
| ENSG00000158636 | AAGUGCU  |
| ENSG00000158636 | ACAGUAU  |
| ENSG00000158636 | GUCACUC  |
| ENSG00000158636 | UAUUGCU  |
| ENSG00000158636 | UUUGCAA  |
| ENSG00000158710 | AUAUUUAU |
| ENSG00000158710 | CUGCAGC  |
| ENSG00000158710 | UCCAGUU  |
| ENSG00000158711 | ACAUCAC  |
| ENSG00000158714 | CCAGUGU  |
| ENSG00000158715 | AUUGCAC  |
| ENSG00000158715 | CAGCAGA  |
| ENSG00000158715 | GGGGUGC  |
| ENSG00000158715 | UAUUGCU  |
| ENSG00000158715 | UCCUGAG  |
| ENSG00000158715 | UGCAAAG  |
| ENSG00000158717 | AAAAAUC  |
| ENSG00000158717 | AUGGCUU  |
| ENSG00000158717 | AUUGCAC  |
| ENSG00000158717 | UGUCUUU  |
| ENSG00000158717 | UCCUAG   |
| ENSG00000158747 | AAAGUGC  |
| ENSG00000158747 | AAGUGCA  |
| ENSG00000158747 | AUAUUUAU |
| ENSG00000158747 | CACAGGG  |
| ENSG00000158747 | CAGCAGG  |
| ENSG00000158747 | CAGCUGG  |
| ENSG00000158747 | CCAGUGC  |
| ENSG00000158747 | CUGACUC  |
| ENSG00000158769 | AGCACCA  |
| ENSG00000158769 | CAGGUGA  |
| ENSG00000158769 | CUGGAAA  |
| ENSG00000158769 | UACAAAG  |
| ENSG00000158769 | UCUCCAA  |
| ENSG00000158769 | UCUGGAA  |
| ENSG00000158773 | AAUUUUA  |
| ENSG00000158773 | CAGUGCA  |
| ENSG00000158773 | GAAGGAA  |
| ENSG00000158773 | GGCAGUG  |
| ENSG00000158786 | AGCCUGC  |
| ENSG00000158792 | AGCACCA  |
| ENSG00000158796 | AACAAAC  |
| ENSG00000158796 | AGCACCA  |
| ENSG00000158796 | AGCAGCA  |
| ENSG00000158796 | AGCCCUU  |
| ENSG00000158796 | AGGGAGG  |
| ENSG00000158796 | CAUGGGU  |
| ENSG00000158796 | CCAGGAG  |

|                 |         |
|-----------------|---------|
| ENSG00000158796 | CUGCAGG |
| ENSG00000158796 | CUUUGGU |
| ENSG00000158796 | UCCAGAG |
| ENSG00000158796 | UUGGUUC |
| ENSG00000158805 | AAUUAUU |
| ENSG00000158805 | CACCAGC |
| ENSG00000158805 | UACAAAG |
| ENSG00000158805 | UAUUACC |
| ENSG00000158813 | ACAUUAC |
| ENSG00000158813 | AGCUGCC |
| ENSG00000158813 | CAGGCUC |
| ENSG00000158813 | CUCCCAA |
| ENSG00000158813 | CUGGCUC |
| ENSG00000158813 | GAGGCAG |
| ENSG00000158813 | GAGGUAG |
| ENSG00000158813 | GGAGAGA |
| ENSG00000158813 | GGAGUCC |
| ENSG00000158813 | GGCUCAG |
| ENSG00000158813 | GGCUCUG |
| ENSG00000158813 | UGAAAUG |
| ENSG00000158813 | UGCUGAC |
| ENSG00000158813 | UUUGCAA |
| ENSG00000158825 | AGGAUGU |
| ENSG00000158825 | UAUAAUA |
| ENSG00000158850 | AAAUCCC |
| ENSG00000158850 | GGGUUCC |
| ENSG00000158856 | ACAUUCA |
| ENSG00000158856 | GGAAGCC |
| ENSG00000158856 | UCACACA |
| ENSG00000158859 | AAAAGUA |
| ENSG00000158859 | ACACACC |
| ENSG00000158859 | AGCCUGC |
| ENSG00000158859 | CCCUGAG |
| ENSG00000158859 | GAGGUAU |
| ENSG00000158859 | GGAUUUC |
| ENSG00000158859 | GGAUUUU |
| ENSG00000158859 | GGCAGGG |
| ENSG00000158859 | GGGGCAG |
| ENSG00000158859 | UCAUACA |
| ENSG00000158859 | UCCCUGU |
| ENSG00000158859 | UCCCUAG |
| ENSG00000158863 | AAGUGCA |
| ENSG00000158863 | AAUGCCC |
| ENSG00000158863 | AGACGGG |
| ENSG00000158863 | CAGCUGG |
| ENSG00000158863 | CCAGGAG |
| ENSG00000158863 | CUGCAGG |
| ENSG00000158863 | GAGGUAG |
| ENSG00000158863 | GAGGUAU |
| ENSG00000158863 | GCAGGUU |
| ENSG00000158863 | GGACCUG |
| ENSG00000158863 | GGCUCUG |
| ENSG00000158863 | GGCUGCG |
| ENSG00000158863 | GGGGUGG |
| ENSG00000158863 | GUGAGGU |
| ENSG00000158863 | UAUUGCU |
| ENSG00000158863 | UCCUUGC |
| ENSG00000158863 | UGGCUGC |
| ENSG00000158863 | UCCUCG  |
| ENSG00000158863 | UUGGCAA |
| ENSG00000158863 | UUUGCAA |
| ENSG00000158863 | UUUGCAC |
| ENSG00000158865 | GUAAACA |
| ENSG00000158882 | AGCCCUU |

|                 |         |
|-----------------|---------|
| ENSG00000158887 | AAAAAUC |
| ENSG00000158887 | ACGUCAU |
| ENSG00000158887 | CAUGGGU |
| ENSG00000158887 | CCGAGC  |
| ENSG00000158887 | CUGCUC  |
| ENSG00000158887 | CUGGAAA |
| ENSG00000158887 | CUGGCUC |
| ENSG00000158887 | CUUCUCU |
| ENSG00000158887 | GGAAUGU |
| ENSG00000158887 | GGCAGGG |
| ENSG00000158887 | GUCAGUU |
| ENSG00000158887 | GUCAUUG |
| ENSG00000158887 | UCCUUU  |
| ENSG00000158887 | UCUUGAG |
| ENSG00000158887 | UGGGGGA |
| ENSG00000158941 | AAAGAGG |
| ENSG00000158941 | ACCACAG |
| ENSG00000158941 | CUUUGGU |
| ENSG00000158941 | GGUUUAC |
| ENSG00000158941 | UUGGUUC |
| ENSG00000158966 | AAUACUG |
| ENSG00000158966 | AAUUUUA |
| ENSG00000158966 | AGCAGCU |
| ENSG00000158966 | AGUAGAC |
| ENSG00000158966 | AUCCUUU |
| ENSG00000158966 | GAGAUGA |
| ENSG00000158966 | GGCAGGG |
| ENSG00000158966 | GGCUCAG |
| ENSG00000158966 | UCAUUUG |
| ENSG00000158985 | AAAGUAU |
| ENSG00000158985 | AUGCCUU |
| ENSG00000158985 | CUACAAA |
| ENSG00000158985 | CUCAAAC |
| ENSG00000158985 | GUAUGUU |
| ENSG00000158987 | AUGGCUU |
| ENSG00000158987 | GUAAACA |
| ENSG00000158987 | GUGCAAA |
| ENSG00000158987 | UCAUUUG |
| ENSG00000159023 | AAAGUGC |
| ENSG00000159023 | AACAUUC |
| ENSG00000159023 | AACUACU |
| ENSG00000159023 | ACAGUAU |
| ENSG00000159023 | ACAUUCA |
| ENSG00000159023 | ACCUGGA |
| ENSG00000159023 | ACUGUGU |
| ENSG00000159023 | AGUGCCU |
| ENSG00000159023 | AUACAAG |
| ENSG00000159023 | CACAGUG |
| ENSG00000159023 | CCCUGAG |
| ENSG00000159023 | CUCUUCC |
| ENSG00000159023 | GAGAUGA |
| ENSG00000159023 | GAGGUAG |
| ENSG00000159023 | GAGUAU  |
| ENSG00000159023 | GCAACUU |
| ENSG00000159023 | GCCUGGG |
| ENSG00000159023 | GGGGAGC |
| ENSG00000159023 | GGGUGGU |
| ENSG00000159023 | UAAUACA |
| ENSG00000159023 | UAUCAGA |
| ENSG00000159023 | UAUUGCU |
| ENSG00000159023 | UCACACA |
| ENSG00000159023 | UCACAGG |
| ENSG00000159023 | UCAUUUG |
| ENSG00000159023 | UCCUGU  |

|                 |          |
|-----------------|----------|
| ENSG00000159023 | UCCUAUA  |
| ENSG00000159023 | UUGGUCC  |
| ENSG00000159082 | ACAAUUAU |
| ENSG00000159082 | ACUGUAG  |
| ENSG00000159082 | AGUAGUU  |
| ENSG00000159082 | AGUGGUU  |
| ENSG00000159082 | CACAGGG  |
| ENSG00000159082 | GGCAGUG  |
| ENSG00000159082 | UAUUGCU  |
| ENSG00000159082 | UCACAGU  |
| ENSG00000159110 | UGCAUAG  |
| ENSG00000159140 | AACACUG  |
| ENSG00000159140 | AAGCGCU  |
| ENSG00000159140 | CACUCCU  |
| ENSG00000159140 | CUUUGGU  |
| ENSG00000159140 | UGAAAUG  |
| ENSG00000159147 | CUUUGGU  |
| ENSG00000159147 | UUCCUCG  |
| ENSG00000159164 | AAAAACC  |
| ENSG00000159164 | AAGACAU  |
| ENSG00000159164 | AGCUGCC  |
| ENSG00000159164 | AGUGUGC  |
| ENSG00000159164 | CUACAGU  |
| ENSG00000159164 | CUCACAC  |
| ENSG00000159164 | GAGCUGC  |
| ENSG00000159164 | GAGGCUG  |
| ENSG00000159164 | GCUGGUG  |
| ENSG00000159164 | GUGCAA   |
| ENSG00000159164 | GUGCCUG  |
| ENSG00000159164 | GUGCUUG  |
| ENSG00000159164 | UACAAAG  |
| ENSG00000159164 | UAUUGCU  |
| ENSG00000159164 | UCACACA  |
| ENSG00000159164 | UCACAGU  |
| ENSG00000159164 | UGCAAAG  |
| ENSG00000159167 | AAGUGCA  |
| ENSG00000159167 | ACUGUUU  |
| ENSG00000159167 | AGUGCAA  |
| ENSG00000159167 | GACCCUG  |
| ENSG00000159167 | GUAAACA  |
| ENSG00000159173 | AAUGUUG  |
| ENSG00000159173 | ACCUGGA  |
| ENSG00000159173 | CCCACCU  |
| ENSG00000159173 | GGGUUUA  |
| ENSG00000159173 | UCCUCU   |
| ENSG00000159173 | UGAGUCU  |
| ENSG00000159173 | UGGCUGC  |
| ENSG00000159184 | UCCCACC  |
| ENSG00000159200 | AAGGCAC  |
| ENSG00000159202 | AAAGCUG  |
| ENSG00000159202 | AACACUG  |
| ENSG00000159202 | AAGACAU  |
| ENSG00000159202 | AAGGUGC  |
| ENSG00000159202 | AUAAAGU  |
| ENSG00000159202 | CACUGUU  |
| ENSG00000159202 | CCUUCUU  |
| ENSG00000159202 | CUUUGGU  |
| ENSG00000159202 | GAUUGUC  |
| ENSG00000159202 | GUCACUC  |
| ENSG00000159202 | UAUAAAG  |
| ENSG00000159202 | UAUUGCU  |
| ENSG00000159202 | UGCAUUA  |
| ENSG00000159202 | UUCAAAU  |
| ENSG00000159202 | UUGGUCC  |

|                 |          |
|-----------------|----------|
| ENSG00000159210 | AAGGCAC  |
| ENSG00000159212 | GGAUUUU  |
| ENSG00000159214 | AAAUUUC  |
| ENSG00000159214 | UGUCUGG  |
| ENSG00000159214 | UGUGCUU  |
| ENSG00000159216 | AAAGUGC  |
| ENSG00000159216 | AAGUGCU  |
| ENSG00000159216 | AAGUUGU  |
| ENSG00000159216 | ACAGUAC  |
| ENSG00000159216 | ACAUUCA  |
| ENSG00000159216 | ACUCAA   |
| ENSG00000159216 | ACUGCAG  |
| ENSG00000159216 | ACUGCAU  |
| ENSG00000159216 | AGUAGUU  |
| ENSG00000159216 | AGUGCCG  |
| ENSG00000159216 | AGUGCCU  |
| ENSG00000159216 | CAAAGUG  |
| ENSG00000159216 | CACAGUG  |
| ENSG00000159216 | CAGCAGA  |
| ENSG00000159216 | CAGCAGG  |
| ENSG00000159216 | CCUGCUG  |
| ENSG00000159216 | CUGCAGC  |
| ENSG00000159216 | GAGUUGA  |
| ENSG00000159216 | GCAUCCC  |
| ENSG00000159216 | UACAAAG  |
| ENSG00000159216 | UCACAUU  |
| ENSG00000159216 | UCAUUUG  |
| ENSG00000159216 | UGAAGCU  |
| ENSG00000159216 | UGACCUA  |
| ENSG00000159216 | UUCAAAU  |
| ENSG00000159216 | UUCUAAU  |
| ENSG00000159217 | AAAGUAAU |
| ENSG00000159217 | AACAAAC  |
| ENSG00000159217 | AAGGCAC  |
| ENSG00000159217 | AAGUGCA  |
| ENSG00000159217 | AAGUGCU  |
| ENSG00000159217 | AAUUGCU  |
| ENSG00000159217 | ACUGGCC  |
| ENSG00000159217 | ACUGGCU  |
| ENSG00000159217 | ACUGUGU  |
| ENSG00000159217 | AGCUGCC  |
| ENSG00000159217 | AGGAGCU  |
| ENSG00000159217 | AGGUAGU  |
| ENSG00000159217 | AGUGCAA  |
| ENSG00000159217 | AGUGCUU  |
| ENSG00000159217 | AUAUAAC  |
| ENSG00000159217 | AUCCUUU  |
| ENSG00000159217 | AUGGCUU  |
| ENSG00000159217 | CAAAGUG  |
| ENSG00000159217 | CACCACC  |
| ENSG00000159217 | CCAGUGC  |
| ENSG00000159217 | CCCCAG   |
| ENSG00000159217 | CCCUGG   |
| ENSG00000159217 | CCCUGUC  |
| ENSG00000159217 | CCUGCUG  |
| ENSG00000159217 | CUCAGGG  |
| ENSG00000159217 | CUCCAUU  |
| ENSG00000159217 | CUCCAA   |
| ENSG00000159217 | CUCUGGG  |
| ENSG00000159217 | CUGGAAA  |
| ENSG00000159217 | CUGGCUC  |
| ENSG00000159217 | CUGGGCA  |
| ENSG00000159217 | CUUCUCU  |
| ENSG00000159217 | CUUUGGU  |

|                 |         |
|-----------------|---------|
| ENSG00000159217 | GCUUCCU |
| ENSG00000159217 | GGAGGAG |
| ENSG00000159217 | GGAGGCA |
| ENSG00000159217 | GGCUCAG |
| ENSG00000159217 | GUCUGCC |
| ENSG00000159217 | GUGAGGU |
| ENSG00000159217 | UCAACAG |
| ENSG00000159217 | UCAUACA |
| ENSG00000159217 | UCUCCAA |
| ENSG00000159217 | UGCAGCU |
| ENSG00000159217 | UGCUGAC |
| ENSG00000159217 | UGUCUUU |
| ENSG00000159217 | UUGGCAA |
| ENSG00000159217 | UUGGCAC |
| ENSG00000159251 | AAACUGU |
| ENSG00000159251 | AUAAUAC |
| ENSG00000159251 | GGUGGUU |
| ENSG00000159251 | GGUUUAC |
| ENSG00000159251 | UUGUGUC |
| ENSG00000159256 | UACAAAG |
| ENSG00000159263 | AACACUG |
| ENSG00000159263 | AAUGCCC |
| ENSG00000159263 | AUUGCAC |
| ENSG00000159263 | GAGGUAG |
| ENSG00000159267 | CUCCAGC |
| ENSG00000159267 | GAGAAAU |
| ENSG00000159267 | GGCAUUG |
| ENSG00000159267 | GUGCCUG |
| ENSG00000159267 | UCCCUUG |
| ENSG00000159267 | UCUGGAA |
| ENSG00000159267 | UGCAUAG |
| ENSG00000159267 | UUGUUCG |
| ENSG00000159307 | UACAGUU |
| ENSG00000159322 | CUUUGGU |
| ENSG00000159322 | UAUAAAG |
| ENSG00000159322 | UGGCUGC |
| ENSG00000159335 | AGGCAGG |
| ENSG00000159335 | AUACAAG |
| ENSG00000159335 | CAGCUGG |
| ENSG00000159335 | GCUGUCU |
| ENSG00000159335 | UCUGGAG |
| ENSG00000159346 | AAAGCUG |
| ENSG00000159346 | AAGUGUG |
| ENSG00000159346 | AAUCUCA |
| ENSG00000159346 | AGUGUGC |
| ENSG00000159346 | CUACAAA |
| ENSG00000159346 | GACAACU |
| ENSG00000159346 | GCCUGGA |
| ENSG00000159346 | UACAAAG |
| ENSG00000159363 | CCAGUGU |
| ENSG00000159363 | GGAGUGU |
| ENSG00000159363 | GGCAGGG |
| ENSG00000159374 | AUCCUUG |
| ENSG00000159374 | UCCUGAG |
| ENSG00000159377 | UACAAAG |
| ENSG00000159388 | AAAAACC |
| ENSG00000159388 | AAAGUAC |
| ENSG00000159388 | AAAGUAU |
| ENSG00000159388 | AACAAAC |
| ENSG00000159388 | AACAGUC |
| ENSG00000159388 | AAGGCAC |
| ENSG00000159388 | AGCACCA |
| ENSG00000159388 | AGCAGCA |
| ENSG00000159388 | AGCUUAU |

|                 |         |
|-----------------|---------|
| ENSG00000159388 | CACAGUG |
| ENSG00000159388 | CAGUCCA |
| ENSG00000159388 | CUGCUCA |
| ENSG00000159388 | CUUUGGU |
| ENSG00000159388 | GAGAACC |
| ENSG00000159388 | GAGAACU |
| ENSG00000159388 | GAGGUAG |
| ENSG00000159388 | GAGGUAU |
| ENSG00000159388 | GCAGCAU |
| ENSG00000159388 | UACAAAG |
| ENSG00000159388 | UCAACAG |
| ENSG00000159388 | UCACAGG |
| ENSG00000159388 | UCAUUUG |
| ENSG00000159388 | UCCUGU  |
| ENSG00000159388 | UGUGCUU |
| ENSG00000159388 | UCCAUA  |
| ENSG00000159399 | CCCUGAG |
| ENSG00000159399 | CUCUCC  |
| ENSG00000159399 | CUUCUCU |
| ENSG00000159399 | CUUUGGU |
| ENSG00000159399 | GAGGUAG |
| ENSG00000159399 | GAGGUAU |
| ENSG00000159423 | CUCAAC  |
| ENSG00000159423 | UGGCUGC |
| ENSG00000159445 | UCUGGAG |
| ENSG00000159450 | AAUUAUU |
| ENSG00000159459 | AAAUUUC |
| ENSG00000159459 | AUGGCUU |
| ENSG00000159459 | CUUUGGU |
| ENSG00000159459 | UCACAGU |
| ENSG00000159459 | UUGGCAA |
| ENSG00000159459 | UUGGCAC |
| ENSG00000159459 | UUUGCAC |
| ENSG00000159461 | AAAGUAU |
| ENSG00000159461 | ACAUAGA |
| ENSG00000159461 | AGCAAAA |
| ENSG00000159461 | AGCACCA |
| ENSG00000159461 | AUAAUAC |
| ENSG00000159461 | CAGCUGG |
| ENSG00000159479 | CUGACUC |
| ENSG00000159479 | UGCUGAC |
| ENSG00000159495 | AGGGAGG |
| ENSG00000159556 | CAUGGGU |
| ENSG00000159556 | GAGUCUU |
| ENSG00000159556 | GGAAUGU |
| ENSG00000159556 | UGAGUCU |
| ENSG00000159556 | UGGGUGA |
| ENSG00000159588 | ACAUUCA |
| ENSG00000159592 | AAUGUUG |
| ENSG00000159592 | AGUAGUU |
| ENSG00000159592 | CAGUAGU |
| ENSG00000159592 | UCCUUU  |
| ENSG00000159625 | GGCAGUG |
| ENSG00000159648 | CCAGGAG |
| ENSG00000159650 | CUCUGGG |
| ENSG00000159658 | AAGGCAC |
| ENSG00000159658 | AAGUGCA |
| ENSG00000159658 | AAUUGCU |
| ENSG00000159658 | AUAUUAU |
| ENSG00000159658 | AUGCACC |
| ENSG00000159658 | CAGGAAC |
| ENSG00000159658 | GCCUGAU |
| ENSG00000159658 | GGCUCAG |
| ENSG00000159658 | GGUUGUC |



|                 |         |
|-----------------|---------|
| ENSG00000159658 | GUCACUC |
| ENSG00000159658 | UAAUAUC |
| ENSG00000159658 | UACAAAG |
| ENSG00000159658 | UAUGGUU |
| ENSG00000159658 | UCAAGUA |
| ENSG00000159658 | UGCAGCU |
| ENSG00000159658 | UUCUAAU |
| ENSG00000159692 | AAAACUG |
| ENSG00000159692 | AAACUGU |
| ENSG00000159692 | AAAUGGU |
| ENSG00000159692 | AAGACAU |
| ENSG00000159692 | AAUGUUG |
| ENSG00000159692 | AAUUAAU |
| ENSG00000159692 | ACUGUGU |
| ENSG00000159692 | AGGACAC |
| ENSG00000159692 | AUUCAUU |
| ENSG00000159692 | GAGAAGA |
| ENSG00000159692 | GCUAGCA |
| ENSG00000159692 | GGAUUUU |
| ENSG00000159692 | GGUUACC |
| ENSG00000159692 | UAUUGCU |
| ENSG00000159692 | UCCUGAG |
| ENSG00000159692 | UGAGAAG |
| ENSG00000159692 | UGUGUGG |
| ENSG00000159713 | AGCAGCU |
| ENSG00000159713 | GGUGGGC |
| ENSG00000159714 | AAAGUGC |
| ENSG00000159714 | AAGUGCA |
| ENSG00000159714 | UAUUGCU |
| ENSG00000159714 | UGCAUAG |
| ENSG00000159723 | UUGGUCC |
| ENSG00000159733 | AAUCCUU |
| ENSG00000159733 | CCAUUAC |
| ENSG00000159784 | AAAAAUC |
| ENSG00000159784 | ACCUGGA |
| ENSG00000159784 | ACUGGCC |
| ENSG00000159784 | AGCACCA |
| ENSG00000159784 | AGGGAGG |
| ENSG00000159784 | AUGCACC |
| ENSG00000159784 | CAAGAGC |
| ENSG00000159784 | CAGACAG |
| ENSG00000159784 | CCCUGAG |
| ENSG00000159784 | CUCUUCC |
| ENSG00000159784 | CUGCCCC |
| ENSG00000159784 | GACCUGG |
| ENSG00000159784 | GUAAACA |
| ENSG00000159784 | UAAGACU |
| ENSG00000159784 | UCAUAGA |
| ENSG00000159784 | UCAUUCG |
| ENSG00000159788 | UCUUGAG |
| ENSG00000159792 | ACAGUAU |
| ENSG00000159792 | AGCAGCA |
| ENSG00000159792 | AGCAGCG |
| ENSG00000159792 | AGCAGCU |
| ENSG00000159792 | AGGCAGG |
| ENSG00000159792 | AUGGCGC |
| ENSG00000159792 | AUGGCUU |
| ENSG00000159792 | CUCUGGG |
| ENSG00000159792 | CUGGCUC |
| ENSG00000159792 | GAGGCAG |
| ENSG00000159792 | GGAGGCA |
| ENSG00000159792 | GGCAGGG |
| ENSG00000159792 | GGCGCCU |
| ENSG00000159792 | GGCUCAG |

|                 |          |
|-----------------|----------|
| ENSG00000159792 | UAAUGCU  |
| ENSG00000159792 | UACAAAG  |
| ENSG00000159792 | UCACACA  |
| ENSG00000159842 | AACAGUC  |
| ENSG00000159842 | AACAUUC  |
| ENSG00000159842 | AAGGCAC  |
| ENSG00000159842 | ACAAGGU  |
| ENSG00000159842 | ACUCAA   |
| ENSG00000159842 | AUAAUAC  |
| ENSG00000159842 | AUCCUUG  |
| ENSG00000159842 | AUCCUUU  |
| ENSG00000159842 | CAAAGCA  |
| ENSG00000159842 | CUCCAGC  |
| ENSG00000159842 | GAAACAU  |
| ENSG00000159842 | GACCCUG  |
| ENSG00000159842 | GGCAGUG  |
| ENSG00000159842 | GGGAGCU  |
| ENSG00000159842 | UCAAGUA  |
| ENSG00000159842 | UCCAGUU  |
| ENSG00000159842 | UGCAUUG  |
| ENSG00000159842 | UUCUCG   |
| ENSG00000159842 | UUUGCAC  |
| ENSG00000159873 | AACAGUC  |
| ENSG00000159873 | AAUACUG  |
| ENSG00000159873 | ACAUUAC  |
| ENSG00000159873 | ACAUUCA  |
| ENSG00000159873 | ACUCAA   |
| ENSG00000159873 | CAGACAG  |
| ENSG00000159873 | GAGAAU   |
| ENSG00000159873 | GCUAGCA  |
| ENSG00000159873 | GGCUCAG  |
| ENSG00000159873 | UCACAGG  |
| ENSG00000159873 | UUCUUGU  |
| ENSG00000159873 | UUGGCAA  |
| ENSG00000159873 | UUGGUCC  |
| ENSG00000159873 | UUGUUCG  |
| ENSG00000159921 | AAAAGUA  |
| ENSG00000159921 | AAAGUAC  |
| ENSG00000159921 | AUAUUAU  |
| ENSG00000159921 | GGAAUGU  |
| ENSG00000159921 | UUGGCAA  |
| ENSG00000160007 | AAAGUGC  |
| ENSG00000160007 | AACAUUC  |
| ENSG00000160007 | AAGUGCA  |
| ENSG00000160007 | ACAAUUAU |
| ENSG00000160007 | ACCACAG  |
| ENSG00000160007 | AGCAAAA  |
| ENSG00000160007 | AGCAGCA  |
| ENSG00000160007 | AGUGCAA  |
| ENSG00000160007 | AUAAAGU  |
| ENSG00000160007 | AUACAAG  |
| ENSG00000160007 | AUAUAAC  |
| ENSG00000160007 | CAGUCCA  |
| ENSG00000160007 | CUGCAGC  |
| ENSG00000160007 | GAGGCUG  |
| ENSG00000160007 | GCUGGUG  |
| ENSG00000160007 | GGCAGCG  |
| ENSG00000160007 | GUUAAUG  |
| ENSG00000160007 | UAAUAUC  |
| ENSG00000160007 | UACAAAG  |
| ENSG00000160007 | UAGGCCG  |
| ENSG00000160007 | UAUAAAG  |
| ENSG00000160007 | UCAACAG  |
| ENSG00000160007 | UGAGAAG  |

|                 |          |
|-----------------|----------|
| ENSG00000160007 | UUCAAAU  |
| ENSG00000160007 | UUGUUCG  |
| ENSG00000160007 | UUUCAAC  |
| ENSG00000160013 | CCCUGG   |
| ENSG00000160013 | GGGUGG   |
| ENSG00000160014 | AAAGAGC  |
| ENSG00000160014 | AAAGCUG  |
| ENSG00000160014 | ACAAUUAU |
| ENSG00000160014 | AGCACCA  |
| ENSG00000160014 | AGCUGCC  |
| ENSG00000160014 | AGGCAGG  |
| ENSG00000160014 | AGGUAGU  |
| ENSG00000160014 | AUUGCAC  |
| ENSG00000160014 | CACAGGG  |
| ENSG00000160014 | CACUGUU  |
| ENSG00000160014 | CUGGGCA  |
| ENSG00000160014 | CUUCACC  |
| ENSG00000160014 | GCCUGGG  |
| ENSG00000160014 | GGAGUGU  |
| ENSG00000160014 | GGGCAG   |
| ENSG00000160014 | UAUUGCU  |
| ENSG00000160014 | UCACAGG  |
| ENSG00000160014 | UCACAGU  |
| ENSG00000160014 | UGCAGCU  |
| ENSG00000160050 | AAGUCAC  |
| ENSG00000160050 | AGCACCA  |
| ENSG00000160050 | CACAGUG  |
| ENSG00000160050 | CUGGGGG  |
| ENSG00000160050 | UCACAGU  |
| ENSG00000160051 | CUUCUCU  |
| ENSG00000160051 | UGCCAGC  |
| ENSG00000160058 | AAAAACC  |
| ENSG00000160058 | AAAGAAU  |
| ENSG00000160058 | AGCACCA  |
| ENSG00000160058 | AGCAGCA  |
| ENSG00000160058 | AGGGAGG  |
| ENSG00000160058 | AUAAUAC  |
| ENSG00000160058 | AUAUAAC  |
| ENSG00000160058 | CAGCAGA  |
| ENSG00000160058 | CAGCUGG  |
| ENSG00000160058 | CCUUCUU  |
| ENSG00000160058 | CUACAAA  |
| ENSG00000160058 | CUCCAC   |
| ENSG00000160058 | CUCUGGG  |
| ENSG00000160058 | CUGCAGC  |
| ENSG00000160058 | CUGGGGG  |
| ENSG00000160058 | GCAGCAU  |
| ENSG00000160058 | GGGGAGC  |
| ENSG00000160058 | GGGUGUU  |
| ENSG00000160058 | UGAAGUG  |
| ENSG00000160058 | UGGGGGA  |
| ENSG00000160058 | UGGGUGA  |
| ENSG00000160058 | UUGAUCA  |
| ENSG00000160058 | UUGGCAC  |
| ENSG00000160058 | UUGGUCC  |
| ENSG00000160058 | UUGUGUC  |
| ENSG00000160087 | GGUUUAC  |
| ENSG00000160087 | UUGGUUC  |
| ENSG00000160094 | AAAAAUC  |
| ENSG00000160094 | AAAGAGC  |
| ENSG00000160094 | AAAGUGC  |
| ENSG00000160094 | AACAGUC  |
| ENSG00000160094 | AACGGAA  |
| ENSG00000160094 | AACUGGU  |

|                 |          |
|-----------------|----------|
| ENSG00000160094 | AAGUGCU  |
| ENSG00000160094 | AAUACUG  |
| ENSG00000160094 | ACAAUUAU |
| ENSG00000160094 | ACAGUAU  |
| ENSG00000160094 | AGCACCA  |
| ENSG00000160094 | AGCAGCA  |
| ENSG00000160094 | AGCAGCG  |
| ENSG00000160094 | AGCAGCU  |
| ENSG00000160094 | AGGGUCU  |
| ENSG00000160094 | AGUAACA  |
| ENSG00000160094 | AUGGCUU  |
| ENSG00000160094 | CAAAACU  |
| ENSG00000160094 | CUGCUC   |
| ENSG00000160094 | CUUCACC  |
| ENSG00000160094 | CUUUGGU  |
| ENSG00000160094 | GAGAAAU  |
| ENSG00000160094 | GAGGUAG  |
| ENSG00000160094 | GCCUGGA  |
| ENSG00000160094 | GCCUGGG  |
| ENSG00000160094 | GGGUGUU  |
| ENSG00000160094 | GGUAGAC  |
| ENSG00000160094 | GUCUGCC  |
| ENSG00000160094 | UAAUAUC  |
| ENSG00000160094 | UACAAAG  |
| ENSG00000160094 | UACAGUU  |
| ENSG00000160094 | UAGACUG  |
| ENSG00000160094 | UCACAAG  |
| ENSG00000160094 | UCCUAUA  |
| ENSG00000160094 | UUGGUCC  |
| ENSG00000160097 | AAGUCAC  |
| ENSG00000160097 | AGCACCA  |
| ENSG00000160097 | AGCAGCU  |
| ENSG00000160097 | AGCCCUU  |
| ENSG00000160097 | AUGGCUU  |
| ENSG00000160097 | CAGGCUC  |
| ENSG00000160097 | CCAGGAG  |
| ENSG00000160097 | GAGAUGA  |
| ENSG00000160097 | GAGGCAG  |
| ENSG00000160097 | GCACCAU  |
| ENSG00000160097 | GGAGAGA  |
| ENSG00000160097 | GGAUGAG  |
| ENSG00000160097 | GGCAGUG  |
| ENSG00000160097 | GGCUCAG  |
| ENSG00000160097 | GGGGCAG  |
| ENSG00000160097 | UGAGGAC  |
| ENSG00000160097 | UGGGUGA  |
| ENSG00000160097 | UUUGCAA  |
| ENSG00000160097 | UUUGCAC  |
| ENSG00000160113 | UUGGUUC  |
| ENSG00000160145 | AGCUGCC  |
| ENSG00000160145 | AUGGCUU  |
| ENSG00000160145 | CAAAACU  |
| ENSG00000160145 | GAGCUGC  |
| ENSG00000160145 | GGCUGCG  |
| ENSG00000160145 | GUGCUUG  |
| ENSG00000160145 | UGGCUGC  |
| ENSG00000160161 | AGCACCA  |
| ENSG00000160179 | UCCUAG   |
| ENSG00000160185 | AAAGUGC  |
| ENSG00000160190 | UUCAAAU  |
| ENSG00000160191 | AAAAAUC  |
| ENSG00000160199 | AAUCCUU  |
| ENSG00000160199 | ACAGUAC  |
| ENSG00000160199 | ACAUUCA  |

|                 |          |
|-----------------|----------|
| ENSG00000160199 | AGCAAAA  |
| ENSG00000160199 | AUCCUUU  |
| ENSG00000160199 | CAGGCUC  |
| ENSG00000160199 | CCAGCAU  |
| ENSG00000160199 | CUCUAGC  |
| ENSG00000160199 | GAAACAU  |
| ENSG00000160199 | UAUAAAAG |
| ENSG00000160199 | UCGCUGC  |
| ENSG00000160199 | UGAAAGG  |
| ENSG00000160199 | UUGGUCC  |
| ENSG00000160201 | CUACAAA  |
| ENSG00000160202 | CUCAAAC  |
| ENSG00000160208 | AAUUUUA  |
| ENSG00000160208 | GAGGUAG  |
| ENSG00000160208 | GUGCUUG  |
| ENSG00000160208 | UACAAAG  |
| ENSG00000160208 | UCCUUGC  |
| ENSG00000160208 | UUGGCAA  |
| ENSG00000160209 | AAGGCAC  |
| ENSG00000160216 | ACCCUGU  |
| ENSG00000160216 | ACUGGCC  |
| ENSG00000160216 | AGUGCAA  |
| ENSG00000160216 | CACAGUG  |
| ENSG00000160216 | CACCAGC  |
| ENSG00000160216 | GAUUGUA  |
| ENSG00000160216 | GGCUCAG  |
| ENSG00000160216 | GUUAAUG  |
| ENSG00000160216 | UAAUAUC  |
| ENSG00000160216 | UAUUGCU  |
| ENSG00000160216 | UCACAGG  |
| ENSG00000160216 | UCCAGUU  |
| ENSG00000160216 | UGUGCUU  |
| ENSG00000160219 | CAAAGCA  |
| ENSG00000160233 | AAGGCAC  |
| ENSG00000160233 | CUGGAAA  |
| ENSG00000160271 | AAGGCAC  |
| ENSG00000160271 | AAGUGCU  |
| ENSG00000160271 | CUUUGGU  |
| ENSG00000160271 | GCAGAAG  |
| ENSG00000160271 | GGCAGUG  |
| ENSG00000160271 | UUGGCAA  |
| ENSG00000160293 | AAAGUGC  |
| ENSG00000160293 | AGCAGCA  |
| ENSG00000160293 | AGUGCAA  |
| ENSG00000160293 | CAAAGUG  |
| ENSG00000160293 | CAAGAGC  |
| ENSG00000160293 | CAGUGCA  |
| ENSG00000160293 | GGCUCUG  |
| ENSG00000160293 | GUAAACA  |
| ENSG00000160293 | GUGCAAA  |
| ENSG00000160293 | UACAAAG  |
| ENSG00000160293 | UCACAGG  |
| ENSG00000160294 | UCACAUU  |
| ENSG00000160305 | AAGUGCA  |
| ENSG00000160305 | AGUGCAA  |
| ENSG00000160305 | AUGGCAC  |
| ENSG00000160305 | CAGCAGA  |
| ENSG00000160305 | GUGCAAA  |
| ENSG00000160307 | AAAGAGG  |
| ENSG00000160307 | CAAAGCA  |
| ENSG00000160307 | GCUUCCU  |
| ENSG00000160310 | CUGGAAA  |
| ENSG00000160310 | UCACAGG  |
| ENSG00000160325 | AAGGCAC  |

|                 |         |
|-----------------|---------|
| ENSG00000160325 | AGCACCA |
| ENSG00000160325 | GAGGUAG |
| ENSG00000160325 | GGUAGAC |
| ENSG00000160392 | AACAGUC |
| ENSG00000160392 | AUAUUAU |
| ENSG00000160392 | GAAAACA |
| ENSG00000160392 | GAGAAAU |
| ENSG00000160408 | AAAUCCC |
| ENSG00000160408 | ACCCUGU |
| ENSG00000160408 | AGUGCCU |
| ENSG00000160408 | AUAAAGU |
| ENSG00000160408 | CCCUGAG |
| ENSG00000160408 | GACCCUG |
| ENSG00000160408 | GGCUCUG |
| ENSG00000160408 | UACAAAG |
| ENSG00000160410 | GGCAGUG |
| ENSG00000160445 | ACACACC |
| ENSG00000160445 | ACACACU |
| ENSG00000160445 | AGCACCA |
| ENSG00000160445 | AGCAGCA |
| ENSG00000160445 | AGCAGCG |
| ENSG00000160445 | AGCAGCU |
| ENSG00000160445 | AGGCAGG |
| ENSG00000160445 | AUAAUAC |
| ENSG00000160445 | AUAUAAC |
| ENSG00000160445 | AUCAUAC |
| ENSG00000160445 | CAAAACU |
| ENSG00000160445 | CAGGCUC |
| ENSG00000160445 | CUGGGCA |
| ENSG00000160445 | GCAGAAG |
| ENSG00000160445 | GCCUGGG |
| ENSG00000160445 | GCUGGUG |
| ENSG00000160445 | GCUUCCU |
| ENSG00000160445 | GGCAGUG |
| ENSG00000160445 | GGCUCAG |
| ENSG00000160445 | GGGGCAG |
| ENSG00000160445 | GGUGGGC |
| ENSG00000160445 | UCACACA |
| ENSG00000160445 | UCAUACA |
| ENSG00000160445 | UUGGCAA |
| ENSG00000160445 | UUGGCAC |
| ENSG00000160460 | AGUGUGC |
| ENSG00000160460 | CACCAGC |
| ENSG00000160460 | GAGGUAG |
| ENSG00000160460 | GAGGUAU |
| ENSG00000160460 | GCAGCAU |
| ENSG00000160460 | GCGGGGC |
| ENSG00000160460 | GGCUCUG |
| ENSG00000160460 | GUGAGGU |
| ENSG00000160469 | AGGCAGG |
| ENSG00000160469 | CCCUGUC |
| ENSG00000160469 | CUUGGGC |
| ENSG00000160469 | GAGCCCC |
| ENSG00000160469 | GCCCUGU |
| ENSG00000160469 | GGCCCUG |
| ENSG00000160469 | UUGUGUC |
| ENSG00000160539 | AGUGCUG |
| ENSG00000160539 | CCCCUGG |
| ENSG00000160539 | CUGGGGG |
| ENSG00000160551 | AAUUAAU |
| ENSG00000160551 | AGCAGCU |
| ENSG00000160551 | AGGCAGG |
| ENSG00000160551 | AUGACAC |
| ENSG00000160551 | AUGGCAC |

|                 |         |
|-----------------|---------|
| ENSG00000160551 | CACAGUG |
| ENSG00000160551 | CAGACAG |
| ENSG00000160551 | CAGCAGA |
| ENSG00000160551 | CAGCAGG |
| ENSG00000160551 | CAGUAGA |
| ENSG00000160551 | GUCAUUG |
| ENSG00000160551 | UCACAGU |
| ENSG00000160551 | UGACAUC |
| ENSG00000160551 | UUGGCAA |
| ENSG00000160551 | UUGGCAC |
| ENSG00000160563 | UAUAAAG |
| ENSG00000160570 | UCCCUUU |
| ENSG00000160570 | UCCUGAG |
| ENSG00000160602 | GGUGGUC |
| ENSG00000160602 | UCCAGAG |
| ENSG00000160606 | UUUCAAC |
| ENSG00000160613 | AAAGCUG |
| ENSG00000160613 | CCCUGAG |
| ENSG00000160613 | GCAGAAG |
| ENSG00000160613 | UCCUGU  |
| ENSG00000160633 | AUGGCAC |
| ENSG00000160633 | GGCAGCG |
| ENSG00000160633 | UACAAAG |
| ENSG00000160633 | UAUUACC |
| ENSG00000160654 | ACCUGGA |
| ENSG00000160679 | ACAGUAU |
| ENSG00000160683 | AAGACAU |
| ENSG00000160683 | ACUGUAG |
| ENSG00000160683 | CCUGUAC |
| ENSG00000160683 | GAAACAU |
| ENSG00000160683 | GACCUGG |
| ENSG00000160683 | GACUUCC |
| ENSG00000160683 | GCUUCCU |
| ENSG00000160683 | GUCUCUG |
| ENSG00000160683 | UGACCUA |
| ENSG00000160685 | AAGACAU |
| ENSG00000160685 | AAGGCAC |
| ENSG00000160685 | ACUCAGC |
| ENSG00000160685 | AGUGCAA |
| ENSG00000160685 | CCAGCAU |
| ENSG00000160685 | GAGGGGC |
| ENSG00000160685 | GCGGAGG |
| ENSG00000160685 | GGCGGGG |
| ENSG00000160685 | GGGGCAG |
| ENSG00000160685 | GGGGUCC |
| ENSG00000160685 | GUGCAAA |
| ENSG00000160685 | UGAAAUG |
| ENSG00000160685 | UGCAUAG |
| ENSG00000160685 | UGCAUAU |
| ENSG00000160685 | UUCAAGC |
| ENSG00000160685 | UUGGUCC |
| ENSG00000160685 | UUUCAAC |
| ENSG00000160691 | AAGGCAC |
| ENSG00000160691 | AAUACUG |
| ENSG00000160691 | CCAGGAG |
| ENSG00000160691 | GAUUGUC |
| ENSG00000160691 | GGAGGCA |
| ENSG00000160691 | GUCUACU |
| ENSG00000160691 | UCCCUUG |
| ENSG00000160691 | UGUAUAA |
| ENSG00000160691 | UUGGCAC |
| ENSG00000160710 | AAAGUGC |
| ENSG00000160710 | AAGUGCA |
| ENSG00000160710 | AAUGCCC |

|                 |         |
|-----------------|---------|
| ENSG00000160710 | AGCAAAA |
| ENSG00000160710 | CAGACAG |
| ENSG00000160712 | AAAGCUG |
| ENSG00000160712 | GGCCUG  |
| ENSG00000160714 | AAAGGUA |
| ENSG00000160714 | AAAGUUU |
| ENSG00000160714 | ACCACAG |
| ENSG00000160714 | ACCAGCA |
| ENSG00000160714 | AGGCAGG |
| ENSG00000160714 | AUCAUAC |
| ENSG00000160714 | AUCCUUU |
| ENSG00000160714 | CAGUCUG |
| ENSG00000160714 | CCAGUGU |
| ENSG00000160714 | CUAGUCC |
| ENSG00000160714 | GAGAAAU |
| ENSG00000160714 | GAGGCAG |
| ENSG00000160714 | GCCUGGA |
| ENSG00000160714 | GCUGGUG |
| ENSG00000160714 | GGCAGCG |
| ENSG00000160714 | GGUAGAC |
| ENSG00000160714 | GGUGGUU |
| ENSG00000160714 | GUGCCUG |
| ENSG00000160714 | UACAAAG |
| ENSG00000160714 | UCCAGAG |
| ENSG00000160714 | UCUGGAG |
| ENSG00000160714 | UUCAAAU |
| ENSG00000160714 | UUGGUCC |
| ENSG00000160716 | AGUGCAA |
| ENSG00000160716 | CAGUGCA |
| ENSG00000160716 | GGGGCAG |
| ENSG00000160716 | UGUGUCA |
| ENSG00000160741 | AAGUGCU |
| ENSG00000160741 | AGUGCUU |
| ENSG00000160741 | CAAAGUG |
| ENSG00000160741 | CAGACAG |
| ENSG00000160741 | CAGGCUC |
| ENSG00000160741 | GGCUCUG |
| ENSG00000160741 | UCCCUUG |
| ENSG00000160753 | CAGUCCA |
| ENSG00000160785 | AGCACCA |
| ENSG00000160785 | AGUGCAA |
| ENSG00000160785 | GCUAGCA |
| ENSG00000160785 | GUAGUGU |
| ENSG00000160785 | UCACAGG |
| ENSG00000160785 | UCACAGU |
| ENSG00000160789 | ACUGUAG |
| ENSG00000160789 | CACAGGG |
| ENSG00000160789 | CUCAGGG |
| ENSG00000160789 | GCACCAU |
| ENSG00000160789 | UUGGUUC |
| ENSG00000160791 | CAAAACU |
| ENSG00000160796 | CAAAACU |
| ENSG00000160796 | GACUUCC |
| ENSG00000160796 | GAGGGGC |
| ENSG00000160796 | GGGCCCC |
| ENSG00000160796 | GUGCAAA |
| ENSG00000160803 | UACAAAG |
| ENSG00000160867 | UAUAAAG |
| ENSG00000160867 | UUCAAAU |
| ENSG00000160883 | UAUUGCU |
| ENSG00000160888 | CCCUGAG |
| ENSG00000160888 | GACCCUG |
| ENSG00000160888 | GGGGGAA |
| ENSG00000160917 | AAAAAUC |



|                 |          |
|-----------------|----------|
| ENSG00000160917 | CAGCAGA  |
| ENSG00000160917 | GAGGUAG  |
| ENSG00000160932 | UCCUGAG  |
| ENSG00000160963 | CACUCCU  |
| ENSG00000160963 | CUCCAGC  |
| ENSG00000160963 | UUCAAAU  |
| ENSG00000160967 | AAAAAUC  |
| ENSG00000160967 | AAUCACU  |
| ENSG00000160967 | AAUCUCU  |
| ENSG00000160967 | ACCACAG  |
| ENSG00000160967 | AGUGUGC  |
| ENSG00000160967 | CUACAAA  |
| ENSG00000160967 | GCCUGU   |
| ENSG00000160967 | GUGCAA   |
| ENSG00000160967 | UAAUGCU  |
| ENSG00000160967 | UCCUGAG  |
| ENSG00000160967 | UGCCUG   |
| ENSG00000160967 | UUAGAGA  |
| ENSG00000160991 | CCCCAG   |
| ENSG00000160994 | AGGGAGG  |
| ENSG00000160999 | CUUCACC  |
| ENSG00000161013 | AAAAAUC  |
| ENSG00000161013 | AAAGUAA  |
| ENSG00000161013 | AAAGUAC  |
| ENSG00000161013 | AAAGUAU  |
| ENSG00000161013 | AAGUCAC  |
| ENSG00000161013 | AGCACCA  |
| ENSG00000161013 | AUAAAGU  |
| ENSG00000161013 | AUGCAUU  |
| ENSG00000161013 | AUGUGGG  |
| ENSG00000161013 | CAA AUGC |
| ENSG00000161013 | CACAGUG  |
| ENSG00000161013 | CACCAGC  |
| ENSG00000161013 | CCAGUGC  |
| ENSG00000161013 | GGCGGGG  |
| ENSG00000161013 | GGGGCAG  |
| ENSG00000161013 | GUGGGGA  |
| ENSG00000161013 | UAUUACC  |
| ENSG00000161013 | UCCAGUU  |
| ENSG00000161021 | AAAACUG  |
| ENSG00000161021 | AACAAAC  |
| ENSG00000161021 | AAGGCAC  |
| ENSG00000161021 | AAGUGCA  |
| ENSG00000161021 | AAGUGCU  |
| ENSG00000161021 | AGUAGUU  |
| ENSG00000161021 | AGUGCAA  |
| ENSG00000161021 | AUAAAGU  |
| ENSG00000161021 | AUGACAC  |
| ENSG00000161021 | AUGGCAC  |
| ENSG00000161021 | CAAAGCA  |
| ENSG00000161021 | CUGCAGC  |
| ENSG00000161021 | CUGGGGG  |
| ENSG00000161021 | GCAGCAU  |
| ENSG00000161021 | GCUGGUG  |
| ENSG00000161021 | GUGCAA   |
| ENSG00000161021 | UAAUAGU  |
| ENSG00000161021 | UAUAAUA  |
| ENSG00000161021 | UCACAUU  |
| ENSG00000161021 | UGUAUAA  |
| ENSG00000161048 | AGGCAGG  |
| ENSG00000161048 | CACAGUG  |
| ENSG00000161048 | GAGGCAG  |
| ENSG00000161048 | GAGGUAG  |
| ENSG00000161179 | CUGCAGC  |

|                 |         |
|-----------------|---------|
| ENSG00000161180 | CAGCAGA |
| ENSG00000161202 | ACCAGCA |
| ENSG00000161202 | ACCCUGU |
| ENSG00000161202 | AUCCUUG |
| ENSG00000161202 | CCUGAG  |
| ENSG00000161202 | GAGGCUG |
| ENSG00000161202 | GAGGGGC |
| ENSG00000161202 | GCAGGUU |
| ENSG00000161202 | GGCCUG  |
| ENSG00000161202 | GGCUGCG |
| ENSG00000161202 | UAGGUAU |
| ENSG00000161202 | UCCCUUG |
| ENSG00000161202 | UGCAUAG |
| ENSG00000161202 | UGGCUGC |
| ENSG00000161203 | AACUGGU |
| ENSG00000161203 | ACUGGCU |
| ENSG00000161203 | CAAAGCA |
| ENSG00000161203 | CUCACAC |
| ENSG00000161203 | CUUUGGU |
| ENSG00000161203 | UGGGGGA |
| ENSG00000161203 | UUGGUCC |
| ENSG00000161243 | AAGGCAC |
| ENSG00000161243 | AGCAGCA |
| ENSG00000161243 | AGGGAGG |
| ENSG00000161267 | AGCACCA |
| ENSG00000161267 | GGCCUG  |
| ENSG00000161381 | CAGCAA  |
| ENSG00000161381 | GAGUCUU |
| ENSG00000161381 | GGGAGCU |
| ENSG00000161381 | UGAGUCU |
| ENSG00000161381 | UUCAAGC |
| ENSG00000161405 | AGCAGCU |
| ENSG00000161405 | CAAAGCA |
| ENSG00000161526 | GAGCUGC |
| ENSG00000161526 | GCUUCCU |
| ENSG00000161526 | GGGUGC  |
| ENSG00000161526 | GGGUGG  |
| ENSG00000161526 | GUAAACA |
| ENSG00000161526 | GUGGGGA |
| ENSG00000161526 | UCCGCUC |
| ENSG00000161526 | UUGACAC |
| ENSG00000161533 | AAAAACC |
| ENSG00000161533 | AACUACU |
| ENSG00000161533 | AAUUGCU |
| ENSG00000161533 | AGCAGCA |
| ENSG00000161533 | CAGCAGG |
| ENSG00000161533 | GAAAACA |
| ENSG00000161533 | GUCAACA |
| ENSG00000161533 | GUUCAUG |
| ENSG00000161533 | UAUAAAG |
| ENSG00000161533 | UGAAAGG |
| ENSG00000161544 | CCUUCUG |
| ENSG00000161544 | GCUUCCU |
| ENSG00000161544 | GGGCCCC |
| ENSG00000161544 | GGGUCUU |
| ENSG00000161544 | GGUUACC |
| ENSG00000161544 | UACAAAG |
| ENSG00000161558 | AAGGCAC |
| ENSG00000161558 | AGGUAGU |
| ENSG00000161558 | GAGAAAU |
| ENSG00000161558 | GAGGUAG |
| ENSG00000161573 | GGAAGAC |
| ENSG00000161573 | UUCUCG  |
| ENSG00000161638 | AGGGAGG |

|                 |          |
|-----------------|----------|
| ENSG00000161638 | AUGUCUG  |
| ENSG00000161638 | CACAGUG  |
| ENSG00000161638 | CAGCUGG  |
| ENSG00000161638 | CCUUCAU  |
| ENSG00000161638 | GGCCCUG  |
| ENSG00000161638 | GUCUCUG  |
| ENSG00000161638 | UAUUGCU  |
| ENSG00000161638 | UCAAGUA  |
| ENSG00000161638 | UCACAGG  |
| ENSG00000161638 | UCACAGU  |
| ENSG00000161638 | UCCUGAG  |
| ENSG00000161638 | UGCAAAG  |
| ENSG00000161638 | UGCAGCU  |
| ENSG00000161638 | UGGCCCU  |
| ENSG00000161642 | AAAGAAU  |
| ENSG00000161642 | AAAGUGC  |
| ENSG00000161642 | AAGCGCU  |
| ENSG00000161642 | AAGUGCU  |
| ENSG00000161642 | AGUGCUG  |
| ENSG00000161642 | AGUGC UU |
| ENSG00000161642 | AUGGCUU  |
| ENSG00000161642 | CAAAGUG  |
| ENSG00000161642 | CACAGUG  |
| ENSG00000161642 | CCCACCG  |
| ENSG00000161642 | CCCACCU  |
| ENSG00000161642 | CCCUGAG  |
| ENSG00000161642 | CCUUCUG  |
| ENSG00000161642 | CUGCCCC  |
| ENSG00000161642 | CUUGGGC  |
| ENSG00000161642 | GACCAUG  |
| ENSG00000161642 | GCGGGGC  |
| ENSG00000161642 | GGAGAGA  |
| ENSG00000161642 | GGAGUCC  |
| ENSG00000161642 | GGCAGGG  |
| ENSG00000161642 | GGCGGGG  |
| ENSG00000161642 | GGGGGAA  |
| ENSG00000161642 | GGGGUGG  |
| ENSG00000161642 | GGUGCGG  |
| ENSG00000161642 | GGUGGGC  |
| ENSG00000161642 | GUGAGGU  |
| ENSG00000161642 | UAUUGCU  |
| ENSG00000161642 | UCACAGU  |
| ENSG00000161642 | UCCCACC  |
| ENSG00000161642 | UGGACUG  |
| ENSG00000161642 | UUGGUCC  |
| ENSG00000161642 | UUUGCGA  |
| ENSG00000161642 | UUUUUGC  |
| ENSG00000161647 | AAAGAAU  |
| ENSG00000161647 | CUUUGGU  |
| ENSG00000161647 | UACAAAG  |
| ENSG00000161647 | UGGUACC  |
| ENSG00000161649 | UCUGGAG  |
| ENSG00000161653 | AUGGCUU  |
| ENSG00000161653 | CUGGGCA  |
| ENSG00000161653 | GAGCCCU  |
| ENSG00000161653 | GCCUGGG  |
| ENSG00000161653 | UUGGUCC  |
| ENSG00000161654 | AAAAACC  |
| ENSG00000161654 | AAAACUG  |
| ENSG00000161654 | AAACUGU  |
| ENSG00000161654 | ACAAGGU  |
| ENSG00000161654 | AGCCAGU  |
| ENSG00000161654 | AGGCAGG  |
| ENSG00000161654 | AUCCCUU  |

|                 |          |
|-----------------|----------|
| ENSG00000161654 | CACAGUG  |
| ENSG00000161654 | CGCCUCC  |
| ENSG00000161654 | CGGCCUG  |
| ENSG00000161654 | CUCUAGC  |
| ENSG00000161654 | GAGACCU  |
| ENSG00000161654 | GCUGGAU  |
| ENSG00000161654 | GGGUUUA  |
| ENSG00000161654 | GUGACUG  |
| ENSG00000161654 | UAAUAUC  |
| ENSG00000161654 | UAUAAAAG |
| ENSG00000161654 | UCACAGU  |
| ENSG00000161654 | UCCUCU   |
| ENSG00000161654 | UCCUGAG  |
| ENSG00000161654 | UGACUGU  |
| ENSG00000161654 | UGCCUG   |
| ENSG00000161654 | UGGGUGA  |
| ENSG00000161654 | UUCAAGC  |
| ENSG00000161654 | UUGAUCA  |
| ENSG00000161654 | UUGUUCG  |
| ENSG00000161671 | CCAGUGU  |
| ENSG00000161671 | GGAGAGA  |
| ENSG00000161677 | GAGGCAG  |
| ENSG00000161714 | GAGGCUG  |
| ENSG00000161791 | AAAGUGC  |
| ENSG00000161791 | AAGUGCA  |
| ENSG00000161791 | AGUGCAA  |
| ENSG00000161791 | AGUGCCU  |
| ENSG00000161791 | CAAAGUG  |
| ENSG00000161791 | CAGCAGA  |
| ENSG00000161791 | CAGUAGA  |
| ENSG00000161791 | CUCUAGC  |
| ENSG00000161791 | GCCUGGG  |
| ENSG00000161791 | GGGGUGG  |
| ENSG00000161791 | GUGCCUG  |
| ENSG00000161791 | GUGUGGC  |
| ENSG00000161791 | UCCUUGC  |
| ENSG00000161791 | UGUGUGG  |
| ENSG00000161791 | UGUUGAA  |
| ENSG00000161800 | AAGUGCA  |
| ENSG00000161800 | GUGCAAA  |
| ENSG00000161800 | UCCCACC  |
| ENSG00000161800 | UGCAAAG  |
| ENSG00000161813 | AAGUCAC  |
| ENSG00000161813 | AAGUGCU  |
| ENSG00000161813 | AAUCCUU  |
| ENSG00000161813 | AGCACCA  |
| ENSG00000161813 | CACAAUG  |
| ENSG00000161813 | CACAGUG  |
| ENSG00000161813 | CCAGUGC  |
| ENSG00000161813 | CUCACAC  |
| ENSG00000161813 | CUCCAGC  |
| ENSG00000161813 | CUGGCUC  |
| ENSG00000161813 | GAGAUGA  |
| ENSG00000161813 | GGAAGAC  |
| ENSG00000161813 | GGAAUGU  |
| ENSG00000161813 | GUAAACA  |
| ENSG00000161813 | UACAGUU  |
| ENSG00000161813 | UCACAAG  |
| ENSG00000161813 | UCACAGG  |
| ENSG00000161813 | UCACAGU  |
| ENSG00000161813 | UCCAGUU  |
| ENSG00000161813 | UCCUAUA  |
| ENSG00000161813 | UGUUGAA  |
| ENSG00000161813 | UUGACAC  |

|                 |         |
|-----------------|---------|
| ENSG00000161835 | AAAGCUG |
| ENSG00000161835 | AACAGUC |
| ENSG00000161835 | AAGGCAC |
| ENSG00000161835 | ACCAGCA |
| ENSG00000161835 | AGCCCUU |
| ENSG00000161835 | GCCCUUA |
| ENSG00000161847 | AAGGCAC |
| ENSG00000161847 | AGGCAGG |
| ENSG00000161847 | CUGCAGC |
| ENSG00000161847 | GAAGGAA |
| ENSG00000161847 | GCUGGUG |
| ENSG00000161847 | GGCUCUG |
| ENSG00000161847 | GUCUCUG |
| ENSG00000161847 | UACAAAG |
| ENSG00000161904 | AAGGCAC |
| ENSG00000161904 | GGAGGCA |
| ENSG00000161904 | GUGAAUG |
| ENSG00000161904 | UAUUGCU |
| ENSG00000161940 | AAUCUCU |
| ENSG00000161940 | ACCAGCA |
| ENSG00000161940 | AGCAAAA |
| ENSG00000161940 | CAGACAG |
| ENSG00000161940 | CAGCAA  |
| ENSG00000161940 | CAGCAGA |
| ENSG00000161940 | UCCAGAG |
| ENSG00000161955 | UCCAGUU |
| ENSG00000161956 | AUAUAAC |
| ENSG00000161956 | AUCCUUU |
| ENSG00000161956 | CACCACC |
| ENSG00000161956 | GCAGGAC |
| ENSG00000161956 | GGCAGGG |
| ENSG00000161956 | GGCAUUG |
| ENSG00000161958 | CUGGCUC |
| ENSG00000161958 | GAGGUAG |
| ENSG00000161958 | GAGGUAU |
| ENSG00000161958 | GGCCUG  |
| ENSG00000161958 | GUCCAGA |
| ENSG00000161958 | GUCUCUG |
| ENSG00000161958 | UAUUGCU |
| ENSG00000161958 | UGCUGAC |
| ENSG00000161958 | UGGCCCU |
| ENSG00000161960 | AAAAAUC |
| ENSG00000161960 | AUACAAG |
| ENSG00000161960 | AUCCCUU |
| ENSG00000161960 | CCCCUGG |
| ENSG00000161960 | CCUUCUG |
| ENSG00000162004 | GCUUCCU |
| ENSG00000162065 | ACCAGCA |
| ENSG00000162065 | CACCAGC |
| ENSG00000162065 | CAGGCUC |
| ENSG00000162069 | AAAGCUG |
| ENSG00000162073 | UCCUGAG |
| ENSG00000162104 | AAGGCAC |
| ENSG00000162104 | AAGUGUG |
| ENSG00000162104 | AAUACUG |
| ENSG00000162104 | ACACACC |
| ENSG00000162104 | ACACACU |
| ENSG00000162104 | ACCACAG |
| ENSG00000162104 | ACUGGCC |
| ENSG00000162104 | ACUGGCU |
| ENSG00000162104 | AGGUAGU |
| ENSG00000162104 | CUUUGGU |
| ENSG00000162104 | GAGGUAG |
| ENSG00000162104 | GCUUCCU |

|                 |         |
|-----------------|---------|
| ENSG00000162104 | GGAAGAC |
| ENSG00000162104 | GGAUGAG |
| ENSG00000162104 | GGCUCAG |
| ENSG00000162104 | GUAGUGU |
| ENSG00000162104 | GUGCAAA |
| ENSG00000162104 | UAUUGCU |
| ENSG00000162104 | UGAUCCA |
| ENSG00000162105 | AAAGUGC |
| ENSG00000162105 | AACAAAC |
| ENSG00000162105 | AACAGUC |
| ENSG00000162105 | AACCUGG |
| ENSG00000162105 | AAGACAU |
| ENSG00000162105 | AAGUGCA |
| ENSG00000162105 | AAUUAAU |
| ENSG00000162105 | AAUUGCU |
| ENSG00000162105 | ACACACU |
| ENSG00000162105 | ACAGUAC |
| ENSG00000162105 | ACAUAGA |
| ENSG00000162105 | ACCUGGA |
| ENSG00000162105 | ACUGUUU |
| ENSG00000162105 | AGCAAAA |
| ENSG00000162105 | AGGAGCU |
| ENSG00000162105 | AGUAGAC |
| ENSG00000162105 | AUACAAG |
| ENSG00000162105 | AUAUAAU |
| ENSG00000162105 | AUGUAAU |
| ENSG00000162105 | CACUGUU |
| ENSG00000162105 | CAGACAG |
| ENSG00000162105 | CAGCAAA |
| ENSG00000162105 | CUAGUAG |
| ENSG00000162105 | CUGGGCA |
| ENSG00000162105 | CUUUGGU |
| ENSG00000162105 | GAAAACA |
| ENSG00000162105 | GAAACAU |
| ENSG00000162105 | GACCUGG |
| ENSG00000162105 | GAGGUAU |
| ENSG00000162105 | GCAGAAG |
| ENSG00000162105 | GCAGGUU |
| ENSG00000162105 | GCAUCCC |
| ENSG00000162105 | GCUGGUG |
| ENSG00000162105 | GUCAUUG |
| ENSG00000162105 | GUGCUUG |
| ENSG00000162105 | GUGGCC  |
| ENSG00000162105 | UAAUGCU |
| ENSG00000162105 | UACAGUU |
| ENSG00000162105 | UAUAAUA |
| ENSG00000162105 | UAUUGCU |
| ENSG00000162105 | UCAACAG |
| ENSG00000162105 | UGAAGUG |
| ENSG00000162105 | UGACCUA |
| ENSG00000162105 | UGCAUUG |
| ENSG00000162105 | UGCCAGC |
| ENSG00000162105 | UGUAUAA |
| ENSG00000162105 | UUAGAGA |
| ENSG00000162105 | UUGGCAA |
| ENSG00000162105 | UUGGUUC |
| ENSG00000162105 | UUGUGAC |
| ENSG00000162105 | UUUGCAA |
| ENSG00000162139 | CAGGUGA |
| ENSG00000162139 | CUACAAA |
| ENSG00000162144 | AAGUCAC |
| ENSG00000162144 | AGCAGCU |
| ENSG00000162144 | CACAGGG |
| ENSG00000162148 | AAGUAGC |

|                 |         |
|-----------------|---------|
| ENSG00000162174 | GCUAGCA |
| ENSG00000162174 | UUCAAAU |
| ENSG00000162188 | CAGGUGA |
| ENSG00000162188 | CUCCAUU |
| ENSG00000162188 | GUGCUUG |
| ENSG00000162188 | UGUGCUU |
| ENSG00000162188 | UUCAAAU |
| ENSG00000162231 | AAAAGUA |
| ENSG00000162231 | ACCCGUA |
| ENSG00000162231 | AGGAGCU |
| ENSG00000162231 | CACAGUG |
| ENSG00000162231 | CCCACCU |
| ENSG00000162231 | CUCUGGG |
| ENSG00000162231 | CUGGCUC |
| ENSG00000162231 | GGCGGGG |
| ENSG00000162231 | GGGCGUG |
| ENSG00000162231 | GGGGUGG |
| ENSG00000162231 | GUCUCUG |
| ENSG00000162231 | GUGCCUG |
| ENSG00000162231 | UCACAGU |
| ENSG00000162236 | AGUGCCU |
| ENSG00000162236 | CAGCAGA |
| ENSG00000162236 | CAGGCUC |
| ENSG00000162236 | CUCCCAA |
| ENSG00000162236 | GGCUCAG |
| ENSG00000162236 | GUCUUGC |
| ENSG00000162236 | UCACAGU |
| ENSG00000162236 | UUGGCAA |
| ENSG00000162236 | UUGGCAC |
| ENSG00000162236 | UUGGUCC |
| ENSG00000162241 | CACCAGC |
| ENSG00000162290 | AAAAGUA |
| ENSG00000162290 | AAAGUAA |
| ENSG00000162290 | AAGGCAC |
| ENSG00000162290 | AAUCCUU |
| ENSG00000162290 | ACAUUAC |
| ENSG00000162290 | ACUCAAA |
| ENSG00000162290 | AGAUAAA |
| ENSG00000162290 | AGCAGCG |
| ENSG00000162290 | AGCAGCU |
| ENSG00000162290 | AGUGCUG |
| ENSG00000162290 | AGUGCUU |
| ENSG00000162290 | AUGGCUU |
| ENSG00000162290 | AUUGCAC |
| ENSG00000162290 | CAAAGCA |
| ENSG00000162290 | CAGCAA  |
| ENSG00000162290 | CAGGCUC |
| ENSG00000162290 | CAGUGCA |
| ENSG00000162290 | CCAUUAC |
| ENSG00000162290 | CCCUGAG |
| ENSG00000162290 | CUUGGGC |
| ENSG00000162290 | CUUUGGU |
| ENSG00000162290 | GAGAAAU |
| ENSG00000162290 | GCUAGCA |
| ENSG00000162290 | GGUUGAC |
| ENSG00000162290 | GUAAACA |
| ENSG00000162290 | UAAUAUC |
| ENSG00000162290 | UAUUGCU |
| ENSG00000162290 | UCAUAGA |
| ENSG00000162290 | UCCUGU  |
| ENSG00000162290 | UCCUUU  |
| ENSG00000162290 | UGCAUAG |
| ENSG00000162290 | UGCAUUG |
| ENSG00000162290 | UGCUGAC |

|                 |         |
|-----------------|---------|
| ENSG00000162290 | UGGGGGA |
| ENSG00000162290 | UUGGUCC |
| ENSG00000162290 | UUGGUUC |
| ENSG00000162298 | AAUACUG |
| ENSG00000162298 | ACUGCAG |
| ENSG00000162298 | ACUGUUU |
| ENSG00000162298 | CACAGGG |
| ENSG00000162298 | GAGCUAA |
| ENSG00000162298 | GAGGGGC |
| ENSG00000162298 | GAGUUGA |
| ENSG00000162298 | GAGUUGG |
| ENSG00000162298 | GGCAGUG |
| ENSG00000162298 | GGGAGCU |
| ENSG00000162298 | GUAACAG |
| ENSG00000162298 | GUUAAUG |
| ENSG00000162298 | UAAUGCU |
| ENSG00000162298 | UACAAAG |
| ENSG00000162298 | UGUGUGG |
| ENSG00000162300 | AUAAAGU |
| ENSG00000162302 | AAAAAUC |
| ENSG00000162302 | AAAGUGC |
| ENSG00000162302 | AAGGCAC |
| ENSG00000162302 | AUAAAGU |
| ENSG00000162302 | AUUGCAC |
| ENSG00000162302 | CACAGUG |
| ENSG00000162302 | CUUUGGU |
| ENSG00000162302 | GGCAGUG |
| ENSG00000162302 | GUGACAG |
| ENSG00000162302 | UAUAAAG |
| ENSG00000162337 | CAUAUUG |
| ENSG00000162337 | GUUCAUG |
| ENSG00000162337 | UUGUUCG |
| ENSG00000162341 | AAGGCAC |
| ENSG00000162344 | AAGUGCU |
| ENSG00000162366 | UCACAGG |
| ENSG00000162366 | UCACAGU |
| ENSG00000162367 | AAAAGUA |
| ENSG00000162367 | AAAGAGC |
| ENSG00000162367 | AAAGAGG |
| ENSG00000162367 | AAAGGUA |
| ENSG00000162367 | AAAGUAC |
| ENSG00000162367 | AAAGUGC |
| ENSG00000162367 | AAGGCAC |
| ENSG00000162367 | AAGUGCU |
| ENSG00000162367 | ACAGUAU |
| ENSG00000162367 | ACCUGGA |
| ENSG00000162367 | AGUGCUG |
| ENSG00000162367 | CACAGUG |
| ENSG00000162367 | CACCACC |
| ENSG00000162367 | CUACAAA |
| ENSG00000162367 | GCAGAAG |
| ENSG00000162367 | GCCCUUA |
| ENSG00000162367 | GGCAGGG |
| ENSG00000162367 | GGCCUG  |
| ENSG00000162367 | GGGCCCC |
| ENSG00000162367 | UCACAAG |
| ENSG00000162367 | UCACCAC |
| ENSG00000162367 | UUCUGCA |
| ENSG00000162368 | AAAGCUG |
| ENSG00000162368 | AAAGUGC |
| ENSG00000162368 | AAGGCAC |
| ENSG00000162368 | AGCACCA |
| ENSG00000162368 | AGCAGCA |
| ENSG00000162368 | AGCAGCG |



|                 |          |
|-----------------|----------|
| ENSG00000162368 | AGUGCAA  |
| ENSG00000162368 | CAAAGUG  |
| ENSG00000162374 | AACACUG  |
| ENSG00000162374 | AAUACUG  |
| ENSG00000162374 | AAUCCUU  |
| ENSG00000162374 | ACUGGCU  |
| ENSG00000162374 | AUCCUUU  |
| ENSG00000162377 | UUUCAAC  |
| ENSG00000162378 | AAACUGU  |
| ENSG00000162378 | AAUCUCA  |
| ENSG00000162378 | ACUGUUU  |
| ENSG00000162378 | AGCUUUAU |
| ENSG00000162378 | AGUGGUU  |
| ENSG00000162378 | AUGGCUU  |
| ENSG00000162378 | CAGUCUG  |
| ENSG00000162378 | CGUGCAU  |
| ENSG00000162378 | GGCAGUG  |
| ENSG00000162378 | UGCUCAC  |
| ENSG00000162378 | UGUGCUU  |
| ENSG00000162378 | UUAGAGA  |
| ENSG00000162384 | ACUCAGG  |
| ENSG00000162402 | AAGGCAC  |
| ENSG00000162402 | AAGGUGC  |
| ENSG00000162402 | AUGUCUG  |
| ENSG00000162402 | CACUCCU  |
| ENSG00000162402 | CAGCAGA  |
| ENSG00000162402 | CAGUCUG  |
| ENSG00000162402 | CUACAGU  |
| ENSG00000162402 | GAGGUAG  |
| ENSG00000162402 | GCAGGUU  |
| ENSG00000162402 | GGCAGUG  |
| ENSG00000162402 | GUGCAA   |
| ENSG00000162402 | UAAGACG  |
| ENSG00000162402 | UACAAAG  |
| ENSG00000162402 | UACAGUU  |
| ENSG00000162402 | UCACAUU  |
| ENSG00000162402 | UCUCCAA  |
| ENSG00000162402 | UUCCAUA  |
| ENSG00000162402 | UUGGCAA  |
| ENSG00000162407 | AAGUCAC  |
| ENSG00000162407 | AAGUCUU  |
| ENSG00000162407 | ACAUAGA  |
| ENSG00000162407 | ACAUUAC  |
| ENSG00000162407 | ACAUUCA  |
| ENSG00000162407 | AGCAGCA  |
| ENSG00000162407 | AGGAUGU  |
| ENSG00000162407 | AGUGCUG  |
| ENSG00000162407 | AUAAUAC  |
| ENSG00000162407 | AUUGCAC  |
| ENSG00000162407 | CAGCAGA  |
| ENSG00000162407 | CAGUAGA  |
| ENSG00000162407 | CAGUGCA  |
| ENSG00000162407 | CUCUAGC  |
| ENSG00000162407 | GCUGUCU  |
| ENSG00000162407 | GGACGGA  |
| ENSG00000162407 | UCACAGU  |
| ENSG00000162409 | AAGGCAC  |
| ENSG00000162409 | CAGUCUG  |
| ENSG00000162409 | CCCUGAG  |
| ENSG00000162409 | GAGGUAG  |
| ENSG00000162409 | GAGGUAU  |
| ENSG00000162409 | GUGCAA   |
| ENSG00000162409 | UAAUACA  |
| ENSG00000162409 | UAGACUG  |

|                 |         |
|-----------------|---------|
| ENSG00000162409 | UCAAGUA |
| ENSG00000162409 | UUCAAGC |
| ENSG00000162409 | UUGGCAA |
| ENSG00000162415 | AUUCAUU |
| ENSG00000162415 | CUGCAGG |
| ENSG00000162415 | GAGGCAG |
| ENSG00000162415 | GAGGUAG |
| ENSG00000162415 | GAGGUAU |
| ENSG00000162415 | GGAGGCA |
| ENSG00000162415 | UAAGACU |
| ENSG00000162415 | UACAGUU |
| ENSG00000162415 | UCAAGUA |
| ENSG00000162415 | UUCUGCA |
| ENSG00000162430 | AAAGCUG |
| ENSG00000162430 | AAGACAU |
| ENSG00000162430 | ACUGGCC |
| ENSG00000162430 | CUACAAA |
| ENSG00000162430 | GAAGGAA |
| ENSG00000162430 | GAGAAAU |
| ENSG00000162430 | GAGCCCC |
| ENSG00000162430 | GGAUUUC |
| ENSG00000162430 | GGCCUG  |
| ENSG00000162430 | GGCUCAG |
| ENSG00000162430 | UCACAGU |
| ENSG00000162430 | UGAAAUG |
| ENSG00000162430 | UGCAAAG |
| ENSG00000162430 | UGGCCCU |
| ENSG00000162430 | UGGCUGC |
| ENSG00000162430 | UUCUGCA |
| ENSG00000162433 | AAGGCAC |
| ENSG00000162434 | AGGAGCU |
| ENSG00000162434 | AUAAAGU |
| ENSG00000162434 | GAGCUAA |
| ENSG00000162434 | GUAAACA |
| ENSG00000162434 | UGGCCAC |
| ENSG00000162437 | AAGGCAC |
| ENSG00000162437 | AUGGCUU |
| ENSG00000162437 | CAGCAGA |
| ENSG00000162437 | GGCAGCG |
| ENSG00000162437 | GUGAGGU |
| ENSG00000162437 | UAAUAUC |
| ENSG00000162437 | UGCAUAU |
| ENSG00000162437 | UUGGCAA |
| ENSG00000162437 | UUGGCAC |
| ENSG00000162456 | GUGCCUG |
| ENSG00000162456 | UCCCACC |
| ENSG00000162461 | AGUGUGC |
| ENSG00000162461 | CUCUGGG |
| ENSG00000162461 | GAGUGUG |
| ENSG00000162461 | GGCAGGG |
| ENSG00000162461 | GUAAACA |
| ENSG00000162461 | GUGCAAA |
| ENSG00000162490 | AGUGCUG |
| ENSG00000162490 | CAGUAGA |
| ENSG00000162490 | CUGCAGC |
| ENSG00000162493 | ACUGCAU |
| ENSG00000162493 | CAGGAAC |
| ENSG00000162493 | CCAGUGC |
| ENSG00000162493 | CUGCUCA |
| ENSG00000162493 | CUUCUCU |
| ENSG00000162493 | GUCUACU |
| ENSG00000162496 | UGCAAAG |
| ENSG00000162510 | AUAUUAU |
| ENSG00000162511 | GAUUGUC |

|                 |         |
|-----------------|---------|
| ENSG00000162512 | GGAGGCA |
| ENSG00000162517 | UGGCCCU |
| ENSG00000162521 | AGUGGUU |
| ENSG00000162521 | CAAAACU |
| ENSG00000162521 | CUCAAAC |
| ENSG00000162521 | GGUGGUU |
| ENSG00000162521 | GUAACAG |
| ENSG00000162521 | UCACAGG |
| ENSG00000162521 | UCACAGU |
| ENSG00000162522 | AAAGAAU |
| ENSG00000162522 | AAAGUGC |
| ENSG00000162522 | AAGUGCU |
| ENSG00000162522 | ACUCAAA |
| ENSG00000162522 | AGGCAGG |
| ENSG00000162522 | AGUGCUU |
| ENSG00000162522 | CAGCAGA |
| ENSG00000162522 | CAGCAGG |
| ENSG00000162522 | CUGCAGG |
| ENSG00000162522 | CUUGGAG |
| ENSG00000162522 | GAGCUGC |
| ENSG00000162522 | GGCCUG  |
| ENSG00000162522 | GUAAACA |
| ENSG00000162522 | GUGCUUG |
| ENSG00000162522 | UCUGGAA |
| ENSG00000162522 | UCUGGAG |
| ENSG00000162522 | UGCAUAG |
| ENSG00000162522 | UGCAUAU |
| ENSG00000162522 | UGUCUGC |
| ENSG00000162522 | UGUGCUU |
| ENSG00000162522 | UUGAGGC |
| ENSG00000162522 | UUGGUCC |
| ENSG00000162545 | AAGUGCA |
| ENSG00000162545 | AGCCCUU |
| ENSG00000162545 | AGUGGUU |
| ENSG00000162545 | CUCACAC |
| ENSG00000162545 | CUUUGGU |
| ENSG00000162545 | GCCUGU  |
| ENSG00000162545 | UCACACA |
| ENSG00000162545 | UCUUGAG |
| ENSG00000162545 | UGCAAAG |
| ENSG00000162545 | UGGGGGA |
| ENSG00000162545 | UGUCUUU |
| ENSG00000162551 | AAAGUUU |
| ENSG00000162551 | CAGUCUG |
| ENSG00000162551 | CUUUGGU |
| ENSG00000162551 | UGAGAAU |
| ENSG00000162551 | UUGGUUC |
| ENSG00000162552 | AAAAACC |
| ENSG00000162552 | AAAGAAU |
| ENSG00000162552 | ACUGUUU |
| ENSG00000162552 | AGAUAAA |
| ENSG00000162552 | AGCAGCG |
| ENSG00000162552 | AGCAGCU |
| ENSG00000162552 | CUGGCUC |
| ENSG00000162552 | CUUUGGU |
| ENSG00000162552 | GAGACCU |
| ENSG00000162552 | GCAGCAU |
| ENSG00000162552 | GGAGGCA |
| ENSG00000162552 | GGCAGCG |
| ENSG00000162552 | GGCCUG  |
| ENSG00000162552 | GGCUCAG |
| ENSG00000162552 | UCCCUUG |
| ENSG00000162552 | UCCCUUU |
| ENSG00000162552 | UCGUGCA |

|                 |          |
|-----------------|----------|
| ENSG00000162552 | UGAGGAC  |
| ENSG00000162552 | UUGGUCC  |
| ENSG00000162576 | CCAGGAG  |
| ENSG00000162591 | AGCACCA  |
| ENSG00000162599 | AAGUGCU  |
| ENSG00000162599 | AUACAAG  |
| ENSG00000162599 | CACACCU  |
| ENSG00000162599 | CUUACAG  |
| ENSG00000162599 | GCACCAU  |
| ENSG00000162599 | UCAACAG  |
| ENSG00000162599 | UUAGAGA  |
| ENSG00000162607 | AUCACUA  |
| ENSG00000162613 | AAAGUAU  |
| ENSG00000162613 | AAUACUG  |
| ENSG00000162613 | ACUGUAG  |
| ENSG00000162613 | AGUGAUC  |
| ENSG00000162613 | CAAAGCA  |
| ENSG00000162613 | CACAAUG  |
| ENSG00000162613 | CAGUAGA  |
| ENSG00000162613 | GCAUCC   |
| ENSG00000162613 | GCUGGAU  |
| ENSG00000162613 | UGCAAAG  |
| ENSG00000162614 | AGUAGUU  |
| ENSG00000162614 | CUAGUAG  |
| ENSG00000162614 | UGGCCCU  |
| ENSG00000162616 | CAGUGCA  |
| ENSG00000162620 | GGCAUUG  |
| ENSG00000162623 | GCUGUCU  |
| ENSG00000162624 | AAAGUGC  |
| ENSG00000162624 | AAGUGCU  |
| ENSG00000162627 | UCCAGAG  |
| ENSG00000162627 | UUGGUUC  |
| ENSG00000162631 | AAAGAAU  |
| ENSG00000162631 | ACACACU  |
| ENSG00000162631 | ACUGGCU  |
| ENSG00000162631 | AUAAUAC  |
| ENSG00000162631 | AUGUAAU  |
| ENSG00000162631 | CACAAUG  |
| ENSG00000162631 | CAGCAA   |
| ENSG00000162631 | CAGCUGG  |
| ENSG00000162631 | CUUUGGU  |
| ENSG00000162631 | GAUUGUC  |
| ENSG00000162631 | GUAAACA  |
| ENSG00000162631 | UAAUACA  |
| ENSG00000162631 | UAUUACC  |
| ENSG00000162631 | UGCCAGC  |
| ENSG00000162631 | UU AUGCA |
| ENSG00000162636 | CUUGUAU  |
| ENSG00000162639 | CAGGAAC  |
| ENSG00000162642 | CACAGUG  |
| ENSG00000162650 | AAAGUUU  |
| ENSG00000162650 | GAGGUAU  |
| ENSG00000162650 | GCCUGGG  |
| ENSG00000162650 | GGAGGAG  |
| ENSG00000162670 | AAAAACC  |
| ENSG00000162670 | AAAAGUA  |
| ENSG00000162670 | AAUUUUA  |
| ENSG00000162670 | AUGUAAU  |
| ENSG00000162670 | CAGCAA   |
| ENSG00000162670 | CUACAAA  |
| ENSG00000162670 | GUCAGUU  |
| ENSG00000162670 | GUGCUUG  |
| ENSG00000162670 | GUUCAUG  |
| ENSG00000162670 | UACAAAG  |

|                 |         |
|-----------------|---------|
| ENSG00000162670 | UAGACUG |
| ENSG00000162670 | UAGAGGA |
| ENSG00000162670 | UAUAAUA |
| ENSG00000162670 | UGUGCUU |
| ENSG00000162676 | AAUACUG |
| ENSG00000162687 | AAAUGGU |
| ENSG00000162688 | CCUUCUU |
| ENSG00000162694 | AACAGUC |
| ENSG00000162694 | AAGGCAC |
| ENSG00000162695 | AAGACAU |
| ENSG00000162695 | ACAGUAU |
| ENSG00000162695 | ACUGCAG |
| ENSG00000162695 | AGCAGCU |
| ENSG00000162695 | AGUGCCU |
| ENSG00000162695 | CCAGCAU |
| ENSG00000162695 | GAGGUAG |
| ENSG00000162695 | GUAGUGU |
| ENSG00000162695 | GUCAACA |
| ENSG00000162695 | UGAAAUG |
| ENSG00000162702 | AACAUUC |
| ENSG00000162702 | GAAACAU |
| ENSG00000162702 | UAAUACA |
| ENSG00000162704 | AAAGCUG |
| ENSG00000162704 | CACAGGG |
| ENSG00000162704 | GGCAUUG |
| ENSG00000162704 | UCAUUCG |
| ENSG00000162704 | UCCAGUU |
| ENSG00000162704 | UUGGUCC |
| ENSG00000162706 | CAAAGCA |
| ENSG00000162706 | CUCCAGC |
| ENSG00000162706 | CUCCAC  |
| ENSG00000162706 | GCCUGGA |
| ENSG00000162706 | GGCCUG  |
| ENSG00000162706 | GGGCCC  |
| ENSG00000162706 | GGGAGC  |
| ENSG00000162706 | UGGCUGC |
| ENSG00000162734 | AAAACUG |
| ENSG00000162734 | AACAGUC |
| ENSG00000162734 | AAGGCAC |
| ENSG00000162734 | ACACACC |
| ENSG00000162734 | ACACACU |
| ENSG00000162734 | ACUGCAG |
| ENSG00000162734 | AUGAGCU |
| ENSG00000162734 | CAAAACU |
| ENSG00000162734 | CAGACAG |
| ENSG00000162734 | CAGGCUC |
| ENSG00000162734 | CAGUCUG |
| ENSG00000162734 | CUGCAGC |
| ENSG00000162734 | GAGCUAA |
| ENSG00000162734 | GGAAUGU |
| ENSG00000162734 | GGCAGUG |
| ENSG00000162734 | GGCUCAG |
| ENSG00000162734 | GUGCAAA |
| ENSG00000162734 | GUGCGCA |
| ENSG00000162734 | GUUAAUG |
| ENSG00000162734 | GUUAGGA |
| ENSG00000162734 | UAAUAUC |
| ENSG00000162734 | UAAUGCU |
| ENSG00000162734 | UGCAAAG |
| ENSG00000162734 | UGCAUUA |
| ENSG00000162735 | ACUCCAG |
| ENSG00000162735 | GACCCUG |
| ENSG00000162735 | GGCUCAG |
| ENSG00000162735 | GUGUGGC |

|                 |          |
|-----------------|----------|
| ENSG00000162735 | UGCUGAC  |
| ENSG00000162736 | CCAGUGC  |
| ENSG00000162736 | CCAGUGU  |
| ENSG00000162736 | GGGGUCC  |
| ENSG00000162736 | UCCAGUU  |
| ENSG00000162738 | AAAAACC  |
| ENSG00000162738 | AAACUGU  |
| ENSG00000162738 | AAUCUCA  |
| ENSG00000162738 | ACAAGGU  |
| ENSG00000162738 | AGCCCUU  |
| ENSG00000162738 | AGGCAGG  |
| ENSG00000162738 | AGUGCUG  |
| ENSG00000162738 | AGUGCUU  |
| ENSG00000162738 | AUAUAAC  |
| ENSG00000162738 | AUAUUAU  |
| ENSG00000162738 | CAA AUGC |
| ENSG00000162738 | CCCUGAG  |
| ENSG00000162738 | CUCCAC   |
| ENSG00000162738 | GACAACU  |
| ENSG00000162738 | GACCCUG  |
| ENSG00000162738 | GAGGCAG  |
| ENSG00000162738 | GAGGUAG  |
| ENSG00000162738 | GAGGUAU  |
| ENSG00000162738 | GCCCUUA  |
| ENSG00000162738 | GUGAGGU  |
| ENSG00000162738 | UCACACA  |
| ENSG00000162738 | UCACAGU  |
| ENSG00000162738 | UCCUAUA  |
| ENSG00000162738 | UGUCUUU  |
| ENSG00000162738 | UUGGCAA  |
| ENSG00000162738 | UUGGCAC  |
| ENSG00000162739 | AGGAGCU  |
| ENSG00000162739 | CCAGGAG  |
| ENSG00000162739 | CUGGAAA  |
| ENSG00000162739 | GAGGCUG  |
| ENSG00000162739 | GAGGUAG  |
| ENSG00000162745 | AAGGUGC  |
| ENSG00000162745 | ACCAGCA  |
| ENSG00000162745 | CUACAAA  |
| ENSG00000162745 | UUUGCAC  |
| ENSG00000162746 | ACCACAG  |
| ENSG00000162761 | AAGUGCU  |
| ENSG00000162761 | AAGUUGU  |
| ENSG00000162761 | ACACACC  |
| ENSG00000162761 | ACACACU  |
| ENSG00000162761 | ACAUUCA  |
| ENSG00000162761 | ACUCAA   |
| ENSG00000162761 | AGCACCA  |
| ENSG00000162761 | CAGUCUG  |
| ENSG00000162761 | CCCACCU  |
| ENSG00000162761 | CUCACAC  |
| ENSG00000162761 | CUUUGGU  |
| ENSG00000162761 | GAAACAU  |
| ENSG00000162761 | GAGGUAG  |
| ENSG00000162761 | GCAUCCC  |
| ENSG00000162761 | GUAUUCU  |
| ENSG00000162761 | GUGAGGU  |
| ENSG00000162761 | GUUAGGA  |
| ENSG00000162761 | UAAGACU  |
| ENSG00000162761 | UACAGUU  |
| ENSG00000162761 | UAUAAUA  |
| ENSG00000162761 | UGAGAAU  |
| ENSG00000162761 | UGCAUAG  |
| ENSG00000162761 | UGCAUAU  |

|                 |          |
|-----------------|----------|
| ENSG00000162761 | UGCCCUG  |
| ENSG00000162769 | UUCAAGC  |
| ENSG00000162769 | UUUCAAC  |
| ENSG00000162772 | AUGGCUU  |
| ENSG00000162772 | GAAACAU  |
| ENSG00000162772 | UCACAGG  |
| ENSG00000162772 | UCACAGU  |
| ENSG00000162775 | AAAGAGG  |
| ENSG00000162775 | CUUCUCU  |
| ENSG00000162775 | GGCAUUG  |
| ENSG00000162775 | UUCCUCG  |
| ENSG00000162777 | ACCACAG  |
| ENSG00000162777 | UCACCAC  |
| ENSG00000162782 | UCAUGAU  |
| ENSG00000162783 | AAAAACC  |
| ENSG00000162783 | AAAUCCC  |
| ENSG00000162783 | ACUGUAG  |
| ENSG00000162783 | CCCUGUC  |
| ENSG00000162783 | GCUUCCU  |
| ENSG00000162783 | GUAAACA  |
| ENSG00000162783 | GUCUGCC  |
| ENSG00000162783 | UAAUACA  |
| ENSG00000162783 | UGACCUA  |
| ENSG00000162804 | AAGUCUU  |
| ENSG00000162804 | GAGGGGC  |
| ENSG00000162813 | GGAAUGU  |
| ENSG00000162817 | AUGUGCC  |
| ENSG00000162849 | AAAGUGC  |
| ENSG00000162849 | AAGGCAC  |
| ENSG00000162849 | AAGUGCU  |
| ENSG00000162849 | GCACCAU  |
| ENSG00000162849 | UGUCUUU  |
| ENSG00000162849 | UUUGCAA  |
| ENSG00000162873 | AGUGCAA  |
| ENSG00000162873 | CACAGUG  |
| ENSG00000162873 | GGAUUUC  |
| ENSG00000162873 | UGUGCUU  |
| ENSG00000162889 | CCCUGAG  |
| ENSG00000162889 | CUUUGGU  |
| ENSG00000162889 | GUCUCUG  |
| ENSG00000162889 | UCAUACA  |
| ENSG00000162892 | GGUCUAG  |
| ENSG00000162896 | ACCAGCA  |
| ENSG00000162896 | GAUUGUA  |
| ENSG00000162896 | GUGACAG  |
| ENSG00000162909 | AAGGCAC  |
| ENSG00000162909 | AAGUCUU  |
| ENSG00000162909 | UAAUAUC  |
| ENSG00000162923 | AAAUGGU  |
| ENSG00000162923 | AAGGCGC  |
| ENSG00000162923 | AGCAAAA  |
| ENSG00000162923 | AGCACCA  |
| ENSG00000162923 | AUAAAAGU |
| ENSG00000162923 | AUACAAG  |
| ENSG00000162923 | GCACCAU  |
| ENSG00000162923 | GUGCAAA  |
| ENSG00000162923 | UCACAAG  |
| ENSG00000162923 | UCUCAAG  |
| ENSG00000162923 | UGCAAAG  |
| ENSG00000162923 | UGCAUAG  |
| ENSG00000162923 | UUCCUAG  |
| ENSG00000162923 | UUUGCAC  |
| ENSG00000162927 | UCCUGAG  |
| ENSG00000162927 | UGAUCCA  |

|                 |         |
|-----------------|---------|
| ENSG00000162928 | AGCAAAA |
| ENSG00000162928 | AGCAGCG |
| ENSG00000162928 | AGCAGCU |
| ENSG00000162928 | CAGCAAA |
| ENSG00000162946 | GCAGCAU |
| ENSG00000162946 | GGCUCUG |
| ENSG00000162949 | UCCCACA |
| ENSG00000162951 | AAAGCUG |
| ENSG00000162951 | AAGACAU |
| ENSG00000162951 | UACAAAG |
| ENSG00000162951 | UCCUGAG |
| ENSG00000162959 | AGUGCAA |
| ENSG00000162959 | CAAAACU |
| ENSG00000162959 | CCCUGAG |
| ENSG00000162959 | GUGCAAA |
| ENSG00000162959 | UAAUACA |
| ENSG00000162971 | GUGACUG |
| ENSG00000162971 | UGAGAAG |
| ENSG00000162971 | UGCAGCU |
| ENSG00000162971 | UGUCUUU |
| ENSG00000162980 | AAAGCUG |
| ENSG00000162980 | ACAUUCA |
| ENSG00000162980 | CAGUAGA |
| ENSG00000162980 | CCAGCAU |
| ENSG00000162980 | GAGGUAG |
| ENSG00000162980 | UCCCUUU |
| ENSG00000162980 | UCCUGAG |
| ENSG00000162980 | UUUGCAC |
| ENSG00000162980 | UUUUUGC |
| ENSG00000162981 | AAAUGGU |
| ENSG00000162981 | AAUUUUA |
| ENSG00000162981 | ACUGGCC |
| ENSG00000162981 | AUGGAUU |
| ENSG00000162981 | CCCCAG  |
| ENSG00000162981 | CUGGAAA |
| ENSG00000162981 | GAGAAAU |
| ENSG00000162981 | GCUGGUG |
| ENSG00000162981 | GGAAUGU |
| ENSG00000162981 | UCUGGAA |
| ENSG00000162981 | UCUGGAG |
| ENSG00000162981 | UGACAUC |
| ENSG00000162981 | UGUUGAA |
| ENSG00000162989 | AAAACUG |
| ENSG00000162989 | AUUGCAC |
| ENSG00000162989 | GUAAACA |
| ENSG00000162989 | UAUUGCU |
| ENSG00000162992 | AAGGCAC |
| ENSG00000162992 | AGCAGCU |
| ENSG00000162992 | CAGUGCA |
| ENSG00000162992 | GGUUUAC |
| ENSG00000162992 | UACAAAG |
| ENSG00000162992 | UAUAAAG |
| ENSG00000162992 | UGCAUUA |
| ENSG00000162992 | UUUGCAC |
| ENSG00000162999 | AUCACUA |
| ENSG00000162999 | AUGACAC |
| ENSG00000162999 | GAAAACA |
| ENSG00000162999 | GCUGGAU |
| ENSG00000162999 | UAUAAAG |
| ENSG00000163013 | AAAGUGC |
| ENSG00000163013 | AAGUGCU |
| ENSG00000163013 | ACACACC |
| ENSG00000163013 | ACACACU |
| ENSG00000163013 | ACAUUCA |



|                 |         |
|-----------------|---------|
| ENSG00000163013 | AGCCUGC |
| ENSG00000163013 | AGCUGCC |
| ENSG00000163013 | AGUGCUG |
| ENSG00000163013 | AUGACAC |
| ENSG00000163013 | CAAAGUG |
| ENSG00000163013 | CACAGGG |
| ENSG00000163013 | CCCCUGG |
| ENSG00000163013 | CUGGGGG |
| ENSG00000163013 | GAGCCCU |
| ENSG00000163013 | GAGCUGC |
| ENSG00000163013 | GAGGCAG |
| ENSG00000163013 | GAUUGUA |
| ENSG00000163013 | GAUUGUC |
| ENSG00000163013 | GCAGGAC |
| ENSG00000163013 | GCCUGAU |
| ENSG00000163013 | GCCUGGA |
| ENSG00000163013 | GCUGGUG |
| ENSG00000163013 | GGCAGUG |
| ENSG00000163013 | GGCCCUG |
| ENSG00000163013 | GUCACUC |
| ENSG00000163013 | GUCCAGA |
| ENSG00000163013 | GUGCUUG |
| ENSG00000163013 | GUGGGGA |
| ENSG00000163013 | UCACCAC |
| ENSG00000163013 | UCCCUCU |
| ENSG00000163013 | UCCUGAG |
| ENSG00000163013 | UGGAUAA |
| ENSG00000163013 | UGGCCCU |
| ENSG00000163013 | UGGGACA |
| ENSG00000163013 | UGUGCUU |
| ENSG00000163013 | UUGGCAA |
| ENSG00000163013 | UUGGCAC |
| ENSG00000163026 | CAGACAG |
| ENSG00000163029 | AGCAAAA |
| ENSG00000163029 | CAAAGCA |
| ENSG00000163029 | CUCAAAC |
| ENSG00000163029 | CUUACAG |
| ENSG00000163032 | AAGGCAC |
| ENSG00000163032 | AGCUGCC |
| ENSG00000163032 | GAGGUAG |
| ENSG00000163032 | GAGGUAU |
| ENSG00000163041 | AAAAACC |
| ENSG00000163041 | AAAGUAU |
| ENSG00000163041 | AGCAAAA |
| ENSG00000163041 | CAAUUGC |
| ENSG00000163041 | CAGGAAC |
| ENSG00000163041 | CUACAAA |
| ENSG00000163041 | CUUACAG |
| ENSG00000163041 | GACAACU |
| ENSG00000163041 | GCUACAU |
| ENSG00000163041 | GUGAAUG |
| ENSG00000163041 | UAAUAGU |
| ENSG00000163041 | UAGGUAU |
| ENSG00000163053 | AAGGCAC |
| ENSG00000163053 | AGCCCUU |
| ENSG00000163053 | GAGGUAG |
| ENSG00000163053 | GCACCAU |
| ENSG00000163053 | GUAACA  |
| ENSG00000163053 | UGAGAAU |
| ENSG00000163064 | CAGCAAA |
| ENSG00000163067 | AAGUCAC |
| ENSG00000163067 | AAGUGCA |
| ENSG00000163069 | AGUGCAA |
| ENSG00000163069 | CAAAGUG |

|                 |          |
|-----------------|----------|
| ENSG00000163069 | GAUUGGU  |
| ENSG00000163069 | GUGCAA   |
| ENSG00000163071 | AAAUGGU  |
| ENSG00000163071 | AACUCUA  |
| ENSG00000163071 | UGUGUGG  |
| ENSG00000163081 | AAACUGU  |
| ENSG00000163081 | AUCCUUG  |
| ENSG00000163081 | UGUCUUU  |
| ENSG00000163081 | UUCCUAG  |
| ENSG00000163083 | AAAAAUC  |
| ENSG00000163083 | AAGUGCU  |
| ENSG00000163083 | AAUUAUU  |
| ENSG00000163083 | ACCCUGU  |
| ENSG00000163083 | CAA AUGC |
| ENSG00000163083 | CAGCUGG  |
| ENSG00000163083 | GAAACAU  |
| ENSG00000163083 | GGCAGUG  |
| ENSG00000163083 | GUGCAA   |
| ENSG00000163083 | GUGCUUG  |
| ENSG00000163083 | UAUAAUA  |
| ENSG00000163083 | UCAUUCG  |
| ENSG00000163083 | UCAUUUG  |
| ENSG00000163083 | UCCAGUU  |
| ENSG00000163083 | UGCAU AU |
| ENSG00000163083 | UUCAAGC  |
| ENSG00000163083 | UUUCAAC  |
| ENSG00000163092 | AAUUUUA  |
| ENSG00000163104 | AAAACUG  |
| ENSG00000163104 | ACACACC  |
| ENSG00000163104 | ACACACU  |
| ENSG00000163104 | AUACAAG  |
| ENSG00000163104 | CCAGUGC  |
| ENSG00000163104 | CCAGUGU  |
| ENSG00000163104 | GUUAAUG  |
| ENSG00000163104 | UAAUGCU  |
| ENSG00000163104 | UCAACAG  |
| ENSG00000163104 | UCACAAG  |
| ENSG00000163110 | AAAGUGC  |
| ENSG00000163110 | AAGUGCU  |
| ENSG00000163110 | ACUGUUU  |
| ENSG00000163110 | AGCAAAA  |
| ENSG00000163110 | AGCAGCA  |
| ENSG00000163110 | AGGGAGG  |
| ENSG00000163110 | AUAAAGU  |
| ENSG00000163110 | AUGCCUU  |
| ENSG00000163110 | AUGUGCC  |
| ENSG00000163110 | CAAAGCA  |
| ENSG00000163110 | CACAAUG  |
| ENSG00000163110 | CACAGGG  |
| ENSG00000163110 | GAAAACA  |
| ENSG00000163110 | GAGAAAU  |
| ENSG00000163110 | GCUGGUG  |
| ENSG00000163110 | GGGAGCU  |
| ENSG00000163110 | GGGGCAG  |
| ENSG00000163110 | GGUGGUU  |
| ENSG00000163110 | UCACAGU  |
| ENSG00000163110 | UUUCAAC  |
| ENSG00000163113 | AAAGCUG  |
| ENSG00000163113 | AAAGU AU |
| ENSG00000163113 | AAGUGCU  |
| ENSG00000163113 | AUGGCUU  |
| ENSG00000163113 | CAGGCUC  |
| ENSG00000163113 | CAGUCCA  |
| ENSG00000163113 | CCCACCU  |

|                 |          |
|-----------------|----------|
| ENSG00000163113 | CCUUCUU  |
| ENSG00000163113 | CUUUGGU  |
| ENSG00000163113 | GGAGUGU  |
| ENSG00000163113 | GUGCUUG  |
| ENSG00000163113 | UAUUGCU  |
| ENSG00000163113 | UCAUUCG  |
| ENSG00000163113 | UCUCCAA  |
| ENSG00000163113 | UGCAUAG  |
| ENSG00000163113 | UGCAUAU  |
| ENSG00000163113 | UUGGUUC  |
| ENSG00000163126 | AACCUGU  |
| ENSG00000163126 | AGGGAGG  |
| ENSG00000163126 | AGGGUUG  |
| ENSG00000163126 | CACAGGG  |
| ENSG00000163126 | GAGGCUG  |
| ENSG00000163126 | GGAAUGU  |
| ENSG00000163126 | UCCAGAG  |
| ENSG00000163131 | CCUGCUG  |
| ENSG00000163131 | UACAAAG  |
| ENSG00000163132 | AACAAAC  |
| ENSG00000163132 | ACAGUAC  |
| ENSG00000163132 | ACAUAGA  |
| ENSG00000163132 | AGCUUUAU |
| ENSG00000163132 | AUAAUAC  |
| ENSG00000163132 | AUAUUUAU |
| ENSG00000163132 | AUCCCUU  |
| ENSG00000163145 | AUCACUA  |
| ENSG00000163145 | AUUCAUU  |
| ENSG00000163145 | CACAGGG  |
| ENSG00000163145 | CUGGGGG  |
| ENSG00000163145 | UCAUUUG  |
| ENSG00000163145 | UUCAAGC  |
| ENSG00000163154 | UCUGGAA  |
| ENSG00000163155 | CAGUGCA  |
| ENSG00000163155 | CUUCUCU  |
| ENSG00000163155 | GCUACAU  |
| ENSG00000163155 | UCUUGAG  |
| ENSG00000163162 | UUCCUCG  |
| ENSG00000163166 | UACAAAG  |
| ENSG00000163171 | AAAUCCC  |
| ENSG00000163171 | AAGGCAC  |
| ENSG00000163171 | ACAGUAC  |
| ENSG00000163171 | ACAGUAU  |
| ENSG00000163171 | AUAUAAC  |
| ENSG00000163171 | AUGUAAU  |
| ENSG00000163171 | CUGCAGC  |
| ENSG00000163171 | CUGCAGG  |
| ENSG00000163171 | GCAGAAG  |
| ENSG00000163171 | GUCUCUG  |
| ENSG00000163171 | UACAGUU  |
| ENSG00000163171 | UGCAAAG  |
| ENSG00000163214 | GAGGUAG  |
| ENSG00000163235 | AAUUUUA  |
| ENSG00000163235 | ACAGUAU  |
| ENSG00000163235 | ACCACAG  |
| ENSG00000163235 | AGUGCAA  |
| ENSG00000163235 | UAUUGCU  |
| ENSG00000163235 | UCAUUCG  |
| ENSG00000163249 | UCACAGG  |
| ENSG00000163249 | UCACAGU  |
| ENSG00000163251 | AAACGGU  |
| ENSG00000163251 | AAAGGUA  |
| ENSG00000163251 | AACGGAA  |
| ENSG00000163251 | AAGAACC  |

|                 |          |
|-----------------|----------|
| ENSG00000163251 | AAGGCAC  |
| ENSG00000163251 | AAGUCAC  |
| ENSG00000163251 | AAUCUCU  |
| ENSG00000163251 | AAUGCCC  |
| ENSG00000163251 | ACAUUAC  |
| ENSG00000163251 | ACCCGUA  |
| ENSG00000163251 | AGCACCA  |
| ENSG00000163251 | AUAU AAC |
| ENSG00000163251 | CAAAGCA  |
| ENSG00000163251 | CACACCU  |
| ENSG00000163251 | CCAGGAG  |
| ENSG00000163251 | CCCCCAG  |
| ENSG00000163251 | CUGGACU  |
| ENSG00000163251 | GCACCAU  |
| ENSG00000163251 | GCCCUGU  |
| ENSG00000163251 | GUAACAG  |
| ENSG00000163251 | GUGCCUG  |
| ENSG00000163251 | UCACAGG  |
| ENSG00000163251 | UCAUUUG  |
| ENSG00000163251 | UGCCUG   |
| ENSG00000163251 | UUCUAAU  |
| ENSG00000163251 | UUGGCAA  |
| ENSG00000163281 | AAGGCAC  |
| ENSG00000163281 | AUAAAGU  |
| ENSG00000163281 | AUUGCAC  |
| ENSG00000163281 | UGCAU AU |
| ENSG00000163288 | GCAGCAU  |
| ENSG00000163288 | UGAAGUG  |
| ENSG00000163291 | AACUACU  |
| ENSG00000163291 | AAGUAGC  |
| ENSG00000163291 | CAGCAA A |
| ENSG00000163291 | UGCAGCU  |
| ENSG00000163297 | AAUUAU U |
| ENSG00000163297 | AGCCCUU  |
| ENSG00000163297 | AUAUUAU  |
| ENSG00000163297 | CAGCUGG  |
| ENSG00000163297 | CCCUGAG  |
| ENSG00000163297 | CUAUACA  |
| ENSG00000163297 | CUUCACC  |
| ENSG00000163297 | CUUGGAG  |
| ENSG00000163297 | GAGCCCU  |
| ENSG00000163297 | GUCAUUG  |
| ENSG00000163297 | UCACAGU  |
| ENSG00000163297 | UGCAAAG  |
| ENSG00000163297 | UGGAGAU  |
| ENSG00000163297 | UUAUGCA  |
| ENSG00000163297 | UUGUGAC  |
| ENSG00000163320 | AAUACUG  |
| ENSG00000163320 | ACAGUAC  |
| ENSG00000163320 | ACUCCAG  |
| ENSG00000163320 | UCUGGAA  |
| ENSG00000163320 | UGAAGCU  |
| ENSG00000163328 | AAGUUGU  |
| ENSG00000163328 | AAUGUUG  |
| ENSG00000163328 | ACUGCAG  |
| ENSG00000163328 | AGAUAAA  |
| ENSG00000163328 | CUAGGCU  |
| ENSG00000163328 | GUGAAUG  |
| ENSG00000163328 | UACAAAG  |
| ENSG00000163328 | UCACAAG  |
| ENSG00000163328 | UCAUUUG  |
| ENSG00000163328 | UGAGAAG  |
| ENSG00000163328 | UGAUCCA  |
| ENSG00000163328 | UUCUGCA  |

|                 |         |
|-----------------|---------|
| ENSG00000163346 | AGCCCUU |
| ENSG00000163346 | CAGUGCA |
| ENSG00000163347 | AGAUAAA |
| ENSG00000163347 | AUACAAG |
| ENSG00000163347 | AUCACUA |
| ENSG00000163347 | CACACCU |
| ENSG00000163347 | GUGAGGU |
| ENSG00000163348 | AAAGCUG |
| ENSG00000163348 | CAAGAGC |
| ENSG00000163348 | CUUCUCU |
| ENSG00000163348 | CUUUGGU |
| ENSG00000163348 | GAGGUAG |
| ENSG00000163348 | GAGGUAU |
| ENSG00000163348 | UACAAAG |
| ENSG00000163348 | UUCAAGC |
| ENSG00000163349 | AACUCUA |
| ENSG00000163349 | AAGGCAC |
| ENSG00000163349 | AAUCACU |
| ENSG00000163349 | AGAUAAA |
| ENSG00000163349 | AUAUUAU |
| ENSG00000163349 | AUGCAUU |
| ENSG00000163349 | AUGGAUU |
| ENSG00000163349 | AUUGCAC |
| ENSG00000163349 | CCAUUAC |
| ENSG00000163349 | CUACAGU |
| ENSG00000163349 | CUUUGGU |
| ENSG00000163349 | GGUUUAC |
| ENSG00000163349 | GUAAACA |
| ENSG00000163349 | GUGCAAA |
| ENSG00000163349 | UAGUGAG |
| ENSG00000163349 | UCAAGUA |
| ENSG00000163349 | UUCUAAU |
| ENSG00000163349 | UUGGUUC |
| ENSG00000163352 | AUCCUUG |
| ENSG00000163352 | CAAAGCA |
| ENSG00000163352 | GAGUCUU |
| ENSG00000163359 | AAAGUUU |
| ENSG00000163359 | AGUGCAA |
| ENSG00000163359 | CAGUGCA |
| ENSG00000163359 | GAGGUAU |
| ENSG00000163359 | GCACCAU |
| ENSG00000163376 | AAUACUG |
| ENSG00000163376 | AGCACCA |
| ENSG00000163376 | CUACAGU |
| ENSG00000163376 | GAGGUAU |
| ENSG00000163376 | UCACAGU |
| ENSG00000163376 | UGCAUAG |
| ENSG00000163378 | CAGCAAA |
| ENSG00000163378 | GAGGUAG |
| ENSG00000163378 | GAGGUAU |
| ENSG00000163378 | GUAAACA |
| ENSG00000163380 | GCUGUCU |
| ENSG00000163382 | CCCACCU |
| ENSG00000163389 | AAGGCAC |
| ENSG00000163389 | GAGGCAG |
| ENSG00000163389 | GAGGUAG |
| ENSG00000163389 | GAGGUAU |
| ENSG00000163389 | GUAAACA |
| ENSG00000163389 | UCACAGG |
| ENSG00000163389 | UCCUGAG |
| ENSG00000163393 | AACACUG |
| ENSG00000163393 | AAGGCAC |
| ENSG00000163393 | CUUUGGU |
| ENSG00000163406 | UCUUGAG |

|                 |         |
|-----------------|---------|
| ENSG00000163412 | AAAGAAU |
| ENSG00000163412 | AAGUCUU |
| ENSG00000163412 | ACCAGCA |
| ENSG00000163412 | AGUGCAA |
| ENSG00000163412 | CCAGCAU |
| ENSG00000163412 | GGAAUGU |
| ENSG00000163412 | UGGGACA |
| ENSG00000163421 | AUAAUAC |
| ENSG00000163428 | ACUCAA  |
| ENSG00000163428 | AGCAGCA |
| ENSG00000163428 | AGCAGCG |
| ENSG00000163428 | AGCAGCU |
| ENSG00000163428 | AUGAUGA |
| ENSG00000163428 | CUAGUAG |
| ENSG00000163428 | GUAAACA |
| ENSG00000163428 | UCAUGAU |
| ENSG00000163428 | UUCCUAG |
| ENSG00000163428 | UUCUAAU |
| ENSG00000163430 | AAGGCAC |
| ENSG00000163430 | AAUACUG |
| ENSG00000163430 | AUUGCAC |
| ENSG00000163430 | CUCUUCC |
| ENSG00000163430 | GGCAGGG |
| ENSG00000163430 | UAUUGCU |
| ENSG00000163430 | UCUCCAA |
| ENSG00000163430 | UGCAAAG |
| ENSG00000163431 | AGCAGCA |
| ENSG00000163431 | CUGCCC  |
| ENSG00000163431 | GCUGUCU |
| ENSG00000163431 | GUGACUG |
| ENSG00000163431 | GUGAGGU |
| ENSG00000163431 | UGGCCCU |
| ENSG00000163431 | UGUAUAA |
| ENSG00000163431 | UUGGCAA |
| ENSG00000163431 | UUGGCAC |
| ENSG00000163435 | CUGCAGG |
| ENSG00000163435 | UCACAGG |
| ENSG00000163435 | UUGGAGG |
| ENSG00000163435 | UUGGUCC |
| ENSG00000163444 | AAAGAAU |
| ENSG00000163444 | AACAAAC |
| ENSG00000163462 | AUGUGCC |
| ENSG00000163462 | CAGCUGG |
| ENSG00000163462 | CAUGGGU |
| ENSG00000163462 | UCACAGU |
| ENSG00000163462 | UUGGCAC |
| ENSG00000163466 | UGAUCA  |
| ENSG00000163468 | GUCAGUU |
| ENSG00000163472 | CUCUUCC |
| ENSG00000163472 | GGCUCUG |
| ENSG00000163472 | UCACCAC |
| ENSG00000163479 | CUGGAAA |
| ENSG00000163479 | GGAGUCC |
| ENSG00000163479 | UCUGGAA |
| ENSG00000163482 | AAUCUCU |
| ENSG00000163482 | CUUCUCU |
| ENSG00000163482 | UACAAAG |
| ENSG00000163485 | GGCUCAG |
| ENSG00000163486 | AAGUUGU |
| ENSG00000163486 | ACAUUCA |
| ENSG00000163486 | AGACCA  |
| ENSG00000163486 | AGCCCUU |
| ENSG00000163486 | AUACAAG |
| ENSG00000163486 | CAAAGCA |

|                 |         |
|-----------------|---------|
| ENSG00000163486 | CCAGGAG |
| ENSG00000163486 | GGAAGAC |
| ENSG00000163486 | GGAAUGU |
| ENSG00000163486 | GGAUUUC |
| ENSG00000163486 | GUGCUUG |
| ENSG00000163486 | UAAGACU |
| ENSG00000163486 | UACAAAG |
| ENSG00000163486 | UCACAGG |
| ENSG00000163486 | UCAUGAU |
| ENSG00000163486 | UCCUGU  |
| ENSG00000163486 | UGAAGUG |
| ENSG00000163501 | AAUUUUA |
| ENSG00000163501 | AGCAGCG |
| ENSG00000163501 | AGCAGCU |
| ENSG00000163501 | CAGCAGA |
| ENSG00000163501 | CCAGGAG |
| ENSG00000163501 | GAGUGUG |
| ENSG00000163501 | GCAGCAU |
| ENSG00000163501 | GGAGUGU |
| ENSG00000163501 | UACAAAG |
| ENSG00000163501 | UAUUACC |
| ENSG00000163501 | UCACAUU |
| ENSG00000163508 | AUGGCUU |
| ENSG00000163508 | AUUGCAC |
| ENSG00000163508 | CUGCAGC |
| ENSG00000163508 | GCAGCAU |
| ENSG00000163512 | AUGCAUU |
| ENSG00000163512 | CAGCUGG |
| ENSG00000163512 | CAUAUUG |
| ENSG00000163512 | CCAUUAC |
| ENSG00000163512 | GAUUGUA |
| ENSG00000163512 | GGGUUUA |
| ENSG00000163512 | GUUCAUG |
| ENSG00000163512 | UGCAUUA |
| ENSG00000163513 | AAAGCUG |
| ENSG00000163513 | ACAGUAU |
| ENSG00000163513 | AGCUUAU |
| ENSG00000163513 | AGUAGUU |
| ENSG00000163513 | AUAUAAC |
| ENSG00000163513 | AUGGCUU |
| ENSG00000163513 | CUUUGGU |
| ENSG00000163513 | UAAUGCU |
| ENSG00000163513 | UCCCUUG |
| ENSG00000163513 | UCCCAUA |
| ENSG00000163516 | ACAGUAC |
| ENSG00000163520 | UCACAGU |
| ENSG00000163531 | AAAGAGC |
| ENSG00000163531 | AACACUG |
| ENSG00000163531 | AAGGCAC |
| ENSG00000163531 | AAGUCUU |
| ENSG00000163531 | AAUACUG |
| ENSG00000163531 | ACCCUGU |
| ENSG00000163531 | ACUGGCU |
| ENSG00000163531 | AUACAAG |
| ENSG00000163531 | CACAGGG |
| ENSG00000163531 | CCCUGUC |
| ENSG00000163531 | CUCCCAA |
| ENSG00000163531 | CUGCAGC |
| ENSG00000163531 | CUGCAGG |
| ENSG00000163531 | CUGGAAA |
| ENSG00000163531 | CUUUGGU |
| ENSG00000163531 | GAGAACU |
| ENSG00000163531 | GAGGCAG |
| ENSG00000163531 | GGCAGGG |

|                 |         |
|-----------------|---------|
| ENSG00000163531 | GUCAGUU |
| ENSG00000163531 | GUCUCUG |
| ENSG00000163531 | GUGCCUG |
| ENSG00000163531 | GUGGCC  |
| ENSG00000163531 | GUGGGGA |
| ENSG00000163531 | GUUAAUG |
| ENSG00000163531 | UAAUACA |
| ENSG00000163531 | UAAUGCU |
| ENSG00000163531 | UACAGUU |
| ENSG00000163531 | UCACAGU |
| ENSG00000163531 | UCCCUGU |
| ENSG00000163531 | UCUGGAA |
| ENSG00000163531 | UGCAUAG |
| ENSG00000163531 | UGCAUUA |
| ENSG00000163531 | UGCUCAC |
| ENSG00000163531 | UUCAAAU |
| ENSG00000163531 | UUGGCAA |
| ENSG00000163531 | UUGGUUC |
| ENSG00000163531 | UUGUGUC |
| ENSG00000163534 | CAUGGAU |
| ENSG00000163539 | AAAGCUG |
| ENSG00000163539 | AAUGUUG |
| ENSG00000163539 | AGCAGCU |
| ENSG00000163539 | AGCAUUC |
| ENSG00000163539 | AUGCACC |
| ENSG00000163539 | AUGUAAU |
| ENSG00000163539 | CACAAUG |
| ENSG00000163539 | CAGUAGA |
| ENSG00000163539 | CUUCUCU |
| ENSG00000163539 | GAGGUAG |
| ENSG00000163539 | GGAAGAC |
| ENSG00000163539 | UAAUACA |
| ENSG00000163539 | UAUUGCU |
| ENSG00000163539 | UCACAAG |
| ENSG00000163539 | UCACAUU |
| ENSG00000163539 | UGCAGCU |
| ENSG00000163539 | UGCCAGC |
| ENSG00000163539 | UUCAAGC |
| ENSG00000163545 | AAGUCUU |
| ENSG00000163545 | AGCAGCU |
| ENSG00000163545 | GAGAUGA |
| ENSG00000163545 | GUGGCC  |
| ENSG00000163545 | UCAAGUA |
| ENSG00000163545 | UUCAAGC |
| ENSG00000163545 | UUUCAAC |
| ENSG00000163558 | AUGGCAC |
| ENSG00000163558 | UCUGGAA |
| ENSG00000163577 | AAAGCUG |
| ENSG00000163577 | AGCAGCA |
| ENSG00000163577 | CAAGAGC |
| ENSG00000163577 | CCAGUAC |
| ENSG00000163577 | CCCUGAG |
| ENSG00000163577 | CUAUACA |
| ENSG00000163577 | CUUUGGU |
| ENSG00000163577 | GAGAACC |
| ENSG00000163577 | GAGAACU |
| ENSG00000163577 | GAGUUGG |
| ENSG00000163577 | GGCAAGA |
| ENSG00000163577 | GGGUCC  |
| ENSG00000163577 | GUAAACA |
| ENSG00000163577 | UCUAGAG |
| ENSG00000163577 | UGAGAAG |
| ENSG00000163577 | UGAGAAU |
| ENSG00000163577 | UGCUCAC |



|                 |          |
|-----------------|----------|
| ENSG00000163577 | UGGCCAC  |
| ENSG00000163577 | UUCAAAU  |
| ENSG00000163577 | UUGAGGC  |
| ENSG00000163577 | UUGGCAA  |
| ENSG00000163581 | UAUAAUA  |
| ENSG00000163590 | AGCUGCC  |
| ENSG00000163590 | CUCCAC   |
| ENSG00000163590 | UCCACA   |
| ENSG00000163590 | UGAAAGG  |
| ENSG00000163596 | AUUCAUU  |
| ENSG00000163596 | CUAGGCU  |
| ENSG00000163596 | GGUUACC  |
| ENSG00000163596 | GUGCAA   |
| ENSG00000163596 | UAAUGCU  |
| ENSG00000163596 | UGCAAAG  |
| ENSG00000163596 | UGCCUG   |
| ENSG00000163596 | UGGCUG   |
| ENSG00000163596 | UUAUGCA  |
| ENSG00000163599 | CAUGGAU  |
| ENSG00000163599 | UCCUGAG  |
| ENSG00000163600 | ACUGUAG  |
| ENSG00000163600 | AGGUAGU  |
| ENSG00000163600 | GAGGUAG  |
| ENSG00000163600 | UCACAGG  |
| ENSG00000163600 | UCACAGU  |
| ENSG00000163600 | UUCAAAU  |
| ENSG00000163602 | AAACUGU  |
| ENSG00000163602 | AAAGAGC  |
| ENSG00000163602 | AAGGCAC  |
| ENSG00000163602 | AGCACCA  |
| ENSG00000163602 | AGCAUUC  |
| ENSG00000163602 | AGGCAGG  |
| ENSG00000163602 | AGGUUAU  |
| ENSG00000163602 | AGUAGAC  |
| ENSG00000163602 | AUAUUAU  |
| ENSG00000163602 | AUGGCUU  |
| ENSG00000163602 | CACCAGC  |
| ENSG00000163602 | CAGCAGA  |
| ENSG00000163602 | CCCUGAG  |
| ENSG00000163602 | CUCCAUI  |
| ENSG00000163602 | CUUUGGU  |
| ENSG00000163602 | GAUUGUA  |
| ENSG00000163602 | GAUUGUC  |
| ENSG00000163602 | GCUGUCU  |
| ENSG00000163602 | GGAAUGU  |
| ENSG00000163602 | GGAGGCA  |
| ENSG00000163602 | GUAACAG  |
| ENSG00000163602 | GUGCCAC  |
| ENSG00000163602 | GUGCUUG  |
| ENSG00000163602 | UCACAGG  |
| ENSG00000163602 | UCACAGU  |
| ENSG00000163602 | UCAUACA  |
| ENSG00000163602 | UCGUGCA  |
| ENSG00000163602 | UGUGCUU  |
| ENSG00000163602 | UUCUAAU  |
| ENSG00000163602 | UUGACAC  |
| ENSG00000163605 | AAUACUG  |
| ENSG00000163606 | GAGGUUAU |
| ENSG00000163618 | AAGGCAC  |
| ENSG00000163618 | CAUAUUG  |
| ENSG00000163618 | GAGAAGA  |
| ENSG00000163618 | UAUAAAG  |
| ENSG00000163618 | UAUUGCU  |
| ENSG00000163618 | UGAGAAU  |

|                 |         |
|-----------------|---------|
| ENSG00000163624 | CACAGUG |
| ENSG00000163624 | GAAACAU |
| ENSG00000163624 | UCACAGG |
| ENSG00000163625 | AAAGUGC |
| ENSG00000163625 | AGCUGCC |
| ENSG00000163625 | AUCCCUU |
| ENSG00000163625 | CAAAGCA |
| ENSG00000163625 | GUGCAAA |
| ENSG00000163625 | UCCCUUU |
| ENSG00000163625 | UGCUGAC |
| ENSG00000163626 | AAUCCUU |
| ENSG00000163626 | UUCAAAU |
| ENSG00000163630 | CUACAAA |
| ENSG00000163635 | AACAUUC |
| ENSG00000163635 | ACUCAA  |
| ENSG00000163635 | CCAGUGC |
| ENSG00000163635 | CUCACAC |
| ENSG00000163635 | GUCCAGA |
| ENSG00000163635 | UCCAGAG |
| ENSG00000163637 | AAAAAUC |
| ENSG00000163637 | AAAGCGC |
| ENSG00000163637 | AACAAAC |
| ENSG00000163637 | AACUACU |
| ENSG00000163637 | AAGCGCU |
| ENSG00000163637 | AAUUUUA |
| ENSG00000163637 | ACAUCAC |
| ENSG00000163637 | ACGUCAU |
| ENSG00000163637 | ACUAGAU |
| ENSG00000163637 | AGCACCA |
| ENSG00000163637 | AUACAAG |
| ENSG00000163637 | CAAAACU |
| ENSG00000163637 | CCAGGAG |
| ENSG00000163637 | CUAUACA |
| ENSG00000163637 | GAAAACA |
| ENSG00000163637 | GAAACAU |
| ENSG00000163637 | GAGAAAU |
| ENSG00000163637 | GGUUGUC |
| ENSG00000163637 | GUCUCUG |
| ENSG00000163637 | GUCUGCC |
| ENSG00000163637 | UCACACA |
| ENSG00000163637 | UCACAGU |
| ENSG00000163637 | UCAUUUG |
| ENSG00000163637 | UCUCAAG |
| ENSG00000163637 | UGACAUC |
| ENSG00000163637 | UGCUGAC |
| ENSG00000163637 | UUUGCAA |
| ENSG00000163638 | AAGGCAC |
| ENSG00000163638 | AUCCUUG |
| ENSG00000163638 | AUCCUUU |
| ENSG00000163638 | AUUGCAC |
| ENSG00000163638 | GAGGUAU |
| ENSG00000163638 | GUAAACA |
| ENSG00000163638 | UUAGGAU |
| ENSG00000163644 | UUGGUUC |
| ENSG00000163659 | AGUGCUU |
| ENSG00000163659 | CUACAAA |
| ENSG00000163659 | GCUACAU |
| ENSG00000163659 | GUAGUGU |
| ENSG00000163659 | UUUUUGC |
| ENSG00000163660 | GUCUGCC |
| ENSG00000163660 | UCCAGUU |
| ENSG00000163661 | AGCACCA |
| ENSG00000163661 | CUUUGGU |
| ENSG00000163661 | UACAAAG |

|                 |         |
|-----------------|---------|
| ENSG00000163673 | AAUCUCA |
| ENSG00000163673 | CAGGCUC |
| ENSG00000163673 | GGCUCAG |
| ENSG00000163681 | AAAGUUU |
| ENSG00000163681 | AAGUCUU |
| ENSG00000163681 | AGGGAGG |
| ENSG00000163681 | GUGCAA  |
| ENSG00000163681 | UACAAAG |
| ENSG00000163681 | UAGGCCG |
| ENSG00000163681 | UCUAGAG |
| ENSG00000163681 | UGCCAGC |
| ENSG00000163683 | AGCAAAA |
| ENSG00000163683 | CGUGCAU |
| ENSG00000163683 | UCGUGCA |
| ENSG00000163683 | UUGGUCC |
| ENSG00000163684 | AUAAAGU |
| ENSG00000163684 | AUGACAC |
| ENSG00000163684 | CAAAACU |
| ENSG00000163684 | CCCUUGG |
| ENSG00000163684 | CCCUGUU |
| ENSG00000163684 | CUGCAGC |
| ENSG00000163684 | CUGCAGG |
| ENSG00000163684 | GAGAAGA |
| ENSG00000163684 | GUUAAUG |
| ENSG00000163684 | UAUAAAG |
| ENSG00000163684 | UGACAUC |
| ENSG00000163684 | UGAGAAG |
| ENSG00000163684 | UGGCCCU |
| ENSG00000163684 | UCCCAUA |
| ENSG00000163684 | UUCUGCA |
| ENSG00000163684 | UUGAUCA |
| ENSG00000163684 | UUUGCAC |
| ENSG00000163686 | AUUCAUU |
| ENSG00000163686 | CUCAGGG |
| ENSG00000163694 | ACAGUAC |
| ENSG00000163694 | ACAGUAU |
| ENSG00000163694 | CACACCU |
| ENSG00000163694 | CAGUAGA |
| ENSG00000163694 | CUUCACC |
| ENSG00000163694 | GGAGUGU |
| ENSG00000163694 | GUAGUGU |
| ENSG00000163694 | GUGCUUG |
| ENSG00000163694 | UCAAGUA |
| ENSG00000163694 | UCACACA |
| ENSG00000163694 | UCAUACA |
| ENSG00000163694 | UCCAGUU |
| ENSG00000163694 | UUGUUCG |
| ENSG00000163697 | AAGGCAC |
| ENSG00000163697 | AAGUGCU |
| ENSG00000163697 | AGCUGCC |
| ENSG00000163697 | AGUGCUG |
| ENSG00000163697 | CAAAGCA |
| ENSG00000163697 | CAAAGUG |
| ENSG00000163697 | GGCAAGA |
| ENSG00000163697 | UGCAUAG |
| ENSG00000163697 | UGCAUUA |
| ENSG00000163701 | CUCCAGC |
| ENSG00000163703 | GCAGCAU |
| ENSG00000163703 | GGCAGCG |
| ENSG00000163703 | GGCAGGG |
| ENSG00000163704 | AAAGAGG |
| ENSG00000163704 | ACCCUGU |
| ENSG00000163704 | CUUUGGU |
| ENSG00000163704 | UUGGCAA |

|                 |         |
|-----------------|---------|
| ENSG00000163714 | AAGACAU |
| ENSG00000163714 | AAGUGCA |
| ENSG00000163714 | AGCACCA |
| ENSG00000163714 | AGCAGCA |
| ENSG00000163714 | CAAAGCA |
| ENSG00000163714 | CACAAUG |
| ENSG00000163714 | CAUAUUG |
| ENSG00000163714 | CCCACCG |
| ENSG00000163714 | CUACAGU |
| ENSG00000163714 | GGGGCAG |
| ENSG00000163714 | UCCACA  |
| ENSG00000163714 | UCUGGAA |
| ENSG00000163714 | UGAAAUG |
| ENSG00000163714 | UGAGAAG |
| ENSG00000163714 | UGAGAAU |
| ENSG00000163714 | UUGGCAA |
| ENSG00000163719 | AUGGCUU |
| ENSG00000163719 | CAGCUGG |
| ENSG00000163719 | CAGGUGA |
| ENSG00000163719 | CAGUGCA |
| ENSG00000163719 | GCAGGUU |
| ENSG00000163719 | GGCUCAG |
| ENSG00000163719 | GUGUCAC |
| ENSG00000163719 | UGUGUCA |
| ENSG00000163734 | AAGACAU |
| ENSG00000163735 | GUGUCAC |
| ENSG00000163735 | UCACAUU |
| ENSG00000163739 | AAGACAU |
| ENSG00000163743 | AAUCCUU |
| ENSG00000163743 | CACUGUU |
| ENSG00000163743 | GACCCUG |
| ENSG00000163743 | GCCCUUA |
| ENSG00000163743 | GUCACUC |
| ENSG00000163743 | GUGACAG |
| ENSG00000163743 | UUAUGCA |
| ENSG00000163755 | GAAGGAA |
| ENSG00000163755 | UUCAAAU |
| ENSG00000163788 | AACACUG |
| ENSG00000163788 | AAUGCCC |
| ENSG00000163788 | ACAAUUA |
| ENSG00000163788 | AGCACCA |
| ENSG00000163788 | AGCUGCC |
| ENSG00000163788 | AUACAAG |
| ENSG00000163788 | AUGGCUU |
| ENSG00000163788 | CAGUGCA |
| ENSG00000163788 | GACCAUG |
| ENSG00000163788 | UGGCCCU |
| ENSG00000163793 | CUGGGCA |
| ENSG00000163795 | CCCCCAG |
| ENSG00000163811 | AACACUG |
| ENSG00000163811 | CUCCAUA |
| ENSG00000163812 | AACAUUC |
| ENSG00000163812 | AAGGCAC |
| ENSG00000163812 | ACAUUCA |
| ENSG00000163812 | AGGCAGG |
| ENSG00000163812 | AGUGCUU |
| ENSG00000163812 | AUUGCAC |
| ENSG00000163812 | CAGCAGA |
| ENSG00000163812 | GCAGCAU |
| ENSG00000163812 | GGAAGCC |
| ENSG00000163812 | UAUUGCU |
| ENSG00000163812 | UGCAUUG |
| ENSG00000163812 | UCCAUA  |
| ENSG00000163814 | AAGGCAC |

|                 |          |
|-----------------|----------|
| ENSG00000163814 | AAUUAUU  |
| ENSG00000163814 | CAGCAA   |
| ENSG00000163814 | GAGCCC   |
| ENSG00000163815 | UGCAAAG  |
| ENSG00000163815 | UUUGCAA  |
| ENSG00000163817 | GAGCUAA  |
| ENSG00000163817 | GAGUUGG  |
| ENSG00000163818 | GCCUGAU  |
| ENSG00000163818 | UCCAGAG  |
| ENSG00000163820 | AAGUGCA  |
| ENSG00000163820 | ACAGGUG  |
| ENSG00000163820 | GUGCUUG  |
| ENSG00000163820 | UCCUGAG  |
| ENSG00000163820 | UGUGCUU  |
| ENSG00000163820 | UUGGCAA  |
| ENSG00000163820 | UUGGCAC  |
| ENSG00000163823 | UGUCUUU  |
| ENSG00000163827 | UCUAGAG  |
| ENSG00000163827 | UUGGUCC  |
| ENSG00000163833 | GUCUUGC  |
| ENSG00000163840 | AAGUGCA  |
| ENSG00000163840 | AUGGCUU  |
| ENSG00000163840 | GGCAGGG  |
| ENSG00000163840 | UGGCCAC  |
| ENSG00000163848 | AACAAAC  |
| ENSG00000163848 | AAGGCAC  |
| ENSG00000163848 | AAGUGCU  |
| ENSG00000163848 | AAUACUG  |
| ENSG00000163848 | AAUCCUU  |
| ENSG00000163848 | AAUGUUG  |
| ENSG00000163848 | ACAAUUAU |
| ENSG00000163848 | ACUCAA   |
| ENSG00000163848 | ACUGUAG  |
| ENSG00000163848 | AGCAUUC  |
| ENSG00000163848 | AGCCAGU  |
| ENSG00000163848 | AGCCCUU  |
| ENSG00000163848 | AGUGCAA  |
| ENSG00000163848 | AUACAAG  |
| ENSG00000163848 | AUAUAAC  |
| ENSG00000163848 | AUAUUAU  |
| ENSG00000163848 | AUGCCUU  |
| ENSG00000163848 | AUUGCAC  |
| ENSG00000163848 | CACAAUG  |
| ENSG00000163848 | CAGACAG  |
| ENSG00000163848 | CAUAUUG  |
| ENSG00000163848 | CCAGUAC  |
| ENSG00000163848 | CCCUGAG  |
| ENSG00000163848 | CCUUCAU  |
| ENSG00000163848 | CUACAGU  |
| ENSG00000163848 | CUAUACA  |
| ENSG00000163848 | CUCCAA   |
| ENSG00000163848 | CUGGAAA  |
| ENSG00000163848 | CUUGGGC  |
| ENSG00000163848 | GAGAACU  |
| ENSG00000163848 | GAGAUGA  |
| ENSG00000163848 | GAUUGUA  |
| ENSG00000163848 | GAUUGUC  |
| ENSG00000163848 | GCCCUUA  |
| ENSG00000163848 | GCUGGUG  |
| ENSG00000163848 | GGAAGAC  |
| ENSG00000163848 | GUAAACA  |
| ENSG00000163848 | GUGACAG  |
| ENSG00000163848 | UCACAGU  |
| ENSG00000163848 | UCCUGU   |

|                 |         |
|-----------------|---------|
| ENSG00000163848 | UCCCUUU |
| ENSG00000163848 | UGAGAAG |
| ENSG00000163848 | UGGUACC |
| ENSG00000163848 | UGUCUGC |
| ENSG00000163848 | UGUCUUU |
| ENSG00000163848 | UUCCUAG |
| ENSG00000163848 | UUUCAAC |
| ENSG00000163867 | CUCAAAC |
| ENSG00000163872 | AAGGCAC |
| ENSG00000163873 | AAACUGU |
| ENSG00000163873 | ACAUCAC |
| ENSG00000163873 | AGAUGUG |
| ENSG00000163873 | AGUAACA |
| ENSG00000163873 | AUGGCUU |
| ENSG00000163873 | AUUCAUU |
| ENSG00000163873 | CAGUUAC |
| ENSG00000163873 | CCAGUGU |
| ENSG00000163873 | CCUUCUG |
| ENSG00000163873 | CUGCAGC |
| ENSG00000163873 | CUUUGGU |
| ENSG00000163873 | GAUUGGU |
| ENSG00000163873 | GCAUCC  |
| ENSG00000163873 | GGAGGCA |
| ENSG00000163873 | GGCAAGA |
| ENSG00000163873 | GGGAACG |
| ENSG00000163873 | GGGUCUU |
| ENSG00000163873 | GUGACUG |
| ENSG00000163873 | GUGCUUG |
| ENSG00000163873 | UCACAGU |
| ENSG00000163873 | UCCAGAG |
| ENSG00000163873 | UCUAGAG |
| ENSG00000163873 | UGCAUAG |
| ENSG00000163873 | UGCAUAU |
| ENSG00000163873 | UGUGCUU |
| ENSG00000163873 | UGUGUGG |
| ENSG00000163873 | UUCUGCA |
| ENSG00000163873 | UUGGUUC |
| ENSG00000163874 | ACAGUAC |
| ENSG00000163874 | CUACAGU |
| ENSG00000163874 | GGCAGCG |
| ENSG00000163874 | UCAACAG |
| ENSG00000163874 | UUGGUUC |
| ENSG00000163877 | AAGGCAC |
| ENSG00000163877 | AAUUUUA |
| ENSG00000163877 | AGUGCAA |
| ENSG00000163877 | CUUUGGU |
| ENSG00000163877 | GUGCAA  |
| ENSG00000163879 | CUACAAA |
| ENSG00000163879 | UAUUACC |
| ENSG00000163882 | AAAAGUA |
| ENSG00000163884 | AAUUAUU |
| ENSG00000163884 | AUGCAUU |
| ENSG00000163884 | GAAGGAA |
| ENSG00000163884 | UACAGUU |
| ENSG00000163884 | UCAUUUG |
| ENSG00000163884 | UCUAGAG |
| ENSG00000163888 | AAAAAUC |
| ENSG00000163888 | AAAGAGG |
| ENSG00000163888 | AAAGUGC |
| ENSG00000163888 | AAGUGCA |
| ENSG00000163888 | ACACACU |
| ENSG00000163888 | CACUCCU |
| ENSG00000163888 | GGGGAGC |
| ENSG00000163898 | GAGGUAG |

|                 |         |
|-----------------|---------|
| ENSG00000163898 | UGACAUC |
| ENSG00000163898 | UGCCUG  |
| ENSG00000163898 | UUAGAGA |
| ENSG00000163902 | CACAGUG |
| ENSG00000163902 | UCACAGU |
| ENSG00000163904 | AACAUUC |
| ENSG00000163904 | CAGCAGG |
| ENSG00000163904 | GAGGUAG |
| ENSG00000163904 | UCCAGUU |
| ENSG00000163909 | ACUCCAG |
| ENSG00000163909 | CAGUCUG |
| ENSG00000163909 | CUCAGGG |
| ENSG00000163909 | CUCUGGG |
| ENSG00000163909 | CUGGGCA |
| ENSG00000163909 | GGCUCUG |
| ENSG00000163914 | ACUCCAG |
| ENSG00000163914 | ACUGUGU |
| ENSG00000163914 | CAAAGUG |
| ENSG00000163914 | GGUGGGC |
| ENSG00000163930 | AACACUG |
| ENSG00000163930 | GAGGGGC |
| ENSG00000163930 | GGCAAGA |
| ENSG00000163930 | UCCUGAG |
| ENSG00000163932 | AACUACU |
| ENSG00000163932 | UCACAGG |
| ENSG00000163932 | UCACAGU |
| ENSG00000163933 | ACCACAG |
| ENSG00000163933 | CUUCUCU |
| ENSG00000163935 | AAAGUGC |
| ENSG00000163935 | AAGUGCA |
| ENSG00000163938 | UCACAAG |
| ENSG00000163939 | AAAAGUA |
| ENSG00000163939 | ACAGUAU |
| ENSG00000163939 | AGUGGUU |
| ENSG00000163939 | AUAAAGU |
| ENSG00000163939 | CCAGUGC |
| ENSG00000163939 | CCAGUGU |
| ENSG00000163939 | GUAAACA |
| ENSG00000163939 | UCAUGAU |
| ENSG00000163939 | UGCAAAG |
| ENSG00000163939 | UGGGAUC |
| ENSG00000163946 | AAAACUG |
| ENSG00000163946 | AAUUUUA |
| ENSG00000163946 | ACAGGUG |
| ENSG00000163946 | GAGGUAG |
| ENSG00000163946 | GAGGUAU |
| ENSG00000163946 | GUUAAUG |
| ENSG00000163946 | UCAUGAU |
| ENSG00000163947 | AAAGUGC |
| ENSG00000163947 | AAAGUUU |
| ENSG00000163947 | AAUACUG |
| ENSG00000163947 | ACAGGUG |
| ENSG00000163947 | ACAGUAU |
| ENSG00000163947 | ACUGUAG |
| ENSG00000163947 | AGUAGUU |
| ENSG00000163947 | AGUGCUG |
| ENSG00000163947 | AUACAAG |
| ENSG00000163947 | CAGUUAC |
| ENSG00000163947 | GCAGGAC |
| ENSG00000163947 | GGAAUGU |
| ENSG00000163947 | GGCAGUG |
| ENSG00000163947 | GUAAACA |
| ENSG00000163947 | UACAGUU |
| ENSG00000163947 | UCCAGAG |

|                 |         |
|-----------------|---------|
| ENSG00000163947 | UGAAAUG |
| ENSG00000163947 | UUGGCAC |
| ENSG00000163950 | AAUUUUA |
| ENSG00000163950 | UUUGCAC |
| ENSG00000163950 | UUUUUGC |
| ENSG00000163964 | AAAUUUC |
| ENSG00000163964 | UUCCUCG |
| ENSG00000163995 | AAAAACC |
| ENSG00000163995 | UCCAGUU |
| ENSG00000164007 | CUUCUCU |
| ENSG00000164007 | GCUGGAU |
| ENSG00000164010 | GAGGCUG |
| ENSG00000164010 | GUAAACA |
| ENSG00000164011 | CCCUGAG |
| ENSG00000164023 | UUGGCAA |
| ENSG00000164023 | UUGGUUC |
| ENSG00000164024 | AAAAAUC |
| ENSG00000164024 | AAAGUGC |
| ENSG00000164024 | AAGUGCU |
| ENSG00000164024 | ACCUGGA |
| ENSG00000164024 | CUCUGGG |
| ENSG00000164024 | CUUCUCU |
| ENSG00000164024 | GAGGCAG |
| ENSG00000164024 | GGCAGUG |
| ENSG00000164024 | UCACAAG |
| ENSG00000164024 | UCCCUUU |
| ENSG00000164024 | UGCAUAG |
| ENSG00000164031 | AAGGCAC |
| ENSG00000164031 | CUGCUCU |
| ENSG00000164032 | CAGUCCA |
| ENSG00000164039 | UGCUCAC |
| ENSG00000164040 | ACAGUAC |
| ENSG00000164040 | ACAUUAC |
| ENSG00000164040 | AUGCAUU |
| ENSG00000164040 | AUGGCAC |
| ENSG00000164040 | CUGCAGC |
| ENSG00000164040 | CUGCAGG |
| ENSG00000164040 | CUUUGGU |
| ENSG00000164040 | GGCAGCG |
| ENSG00000164040 | GGCAGUG |
| ENSG00000164040 | GUAGUGU |
| ENSG00000164040 | UACAAAG |
| ENSG00000164040 | UACAGUU |
| ENSG00000164040 | UCAAGUA |
| ENSG00000164040 | UGGCCAC |
| ENSG00000164040 | UUGGUUC |
| ENSG00000164045 | AAAGUUU |
| ENSG00000164045 | AACACUG |
| ENSG00000164045 | AAUGCCC |
| ENSG00000164045 | ACUCAA  |
| ENSG00000164045 | AGCUUAU |
| ENSG00000164045 | AGGUAGU |
| ENSG00000164045 | CUCAAAC |
| ENSG00000164045 | GAGAAAU |
| ENSG00000164045 | GGCAGUG |
| ENSG00000164048 | CCCCUGG |
| ENSG00000164051 | GGAGGAG |
| ENSG00000164054 | GUGGCC  |
| ENSG00000164054 | UGCAUUG |
| ENSG00000164054 | UUGGUCC |
| ENSG00000164056 | AAGGCAC |
| ENSG00000164056 | ACAAUAU |
| ENSG00000164056 | AGCACCA |
| ENSG00000164056 | AUACAAG |



|                 |         |
|-----------------|---------|
| ENSG00000164056 | GUGUCAC |
| ENSG00000164056 | UAAUAUC |
| ENSG00000164056 | UGUCUUU |
| ENSG00000164056 | UUGUGAC |
| ENSG00000164061 | AAAGAGG |
| ENSG00000164061 | AAAGUUU |
| ENSG00000164061 | AAAUCCC |
| ENSG00000164061 | AACAGUC |
| ENSG00000164061 | ACAAGGU |
| ENSG00000164061 | ACUCCAG |
| ENSG00000164061 | AGGAGCU |
| ENSG00000164061 | AGGGAGG |
| ENSG00000164061 | AUGGCUU |
| ENSG00000164061 | CAAAGCA |
| ENSG00000164061 | CACAAUG |
| ENSG00000164061 | CAGCUGG |
| ENSG00000164061 | CCAGUGC |
| ENSG00000164061 | CCCACCU |
| ENSG00000164061 | CCCUGAG |
| ENSG00000164061 | CGGUGCU |
| ENSG00000164061 | CGUGCAU |
| ENSG00000164061 | CUCACAC |
| ENSG00000164061 | CUCCCAA |
| ENSG00000164061 | CUCUUCC |
| ENSG00000164061 | CUGACUC |
| ENSG00000164061 | GAGAAAU |
| ENSG00000164061 | GAGGUAG |
| ENSG00000164061 | GAGUCUU |
| ENSG00000164061 | GCAGAAG |
| ENSG00000164061 | GGAAUGU |
| ENSG00000164061 | GGAGGAG |
| ENSG00000164061 | GGCUCAG |
| ENSG00000164061 | GGGCCCC |
| ENSG00000164061 | GGGGCAG |
| ENSG00000164061 | GUAAACA |
| ENSG00000164061 | GUCCAGA |
| ENSG00000164061 | GUGCAAA |
| ENSG00000164061 | GUUAGGA |
| ENSG00000164061 | UAUUGCU |
| ENSG00000164061 | UCACACA |
| ENSG00000164061 | UCCAGUU |
| ENSG00000164061 | UCCCUGU |
| ENSG00000164061 | UCGUGCA |
| ENSG00000164061 | UCUCAAG |
| ENSG00000164061 | UCUCACC |
| ENSG00000164061 | UCUCCAA |
| ENSG00000164061 | UGCAAAG |
| ENSG00000164061 | UGCAUAG |
| ENSG00000164061 | UGCAUAU |
| ENSG00000164061 | UGCCAGC |
| ENSG00000164061 | UGGAGAU |
| ENSG00000164061 | UGUAUAA |
| ENSG00000164061 | UGUGCUU |
| ENSG00000164061 | UUUGCAA |
| ENSG00000164070 | AACUACU |
| ENSG00000164070 | CAGUGCA |
| ENSG00000164076 | AGCAAAA |
| ENSG00000164076 | CUCAGGG |
| ENSG00000164076 | UAGGGCC |
| ENSG00000164076 | UCCACA  |
| ENSG00000164076 | UGCCAGC |
| ENSG00000164076 | UUCUGCA |
| ENSG00000164077 | UAAUGCU |
| ENSG00000164082 | CUCCAGC |

|                 |          |
|-----------------|----------|
| ENSG00000164088 | AACCGU   |
| ENSG00000164088 | AGGACAC  |
| ENSG00000164088 | GAGAACU  |
| ENSG00000164091 | AAAAAUC  |
| ENSG00000164091 | AAAGUGC  |
| ENSG00000164091 | AAGACAU  |
| ENSG00000164091 | AAUACUG  |
| ENSG00000164091 | ACUGCAU  |
| ENSG00000164091 | ACUGGCC  |
| ENSG00000164091 | ACUGGCU  |
| ENSG00000164091 | AGUAACA  |
| ENSG00000164091 | AUAU AAC |
| ENSG00000164091 | AUGUAAU  |
| ENSG00000164091 | CAAAACU  |
| ENSG00000164091 | CAAAGUG  |
| ENSG00000164091 | CAAAGUC  |
| ENSG00000164091 | CACAGGG  |
| ENSG00000164091 | CACUCCU  |
| ENSG00000164091 | CAGACAG  |
| ENSG00000164091 | CAGCAAA  |
| ENSG00000164091 | CAGCAGA  |
| ENSG00000164091 | CAGCAGG  |
| ENSG00000164091 | GAAACAU  |
| ENSG00000164091 | GAGCUGC  |
| ENSG00000164091 | GCUAGCA  |
| ENSG00000164091 | GGAAGAC  |
| ENSG00000164091 | GGGAGCU  |
| ENSG00000164091 | UCACACA  |
| ENSG00000164091 | UUGGCAA  |
| ENSG00000164093 | AAAAGUA  |
| ENSG00000164093 | AAAGUAA  |
| ENSG00000164093 | AGUGGUU  |
| ENSG00000164093 | AUCCUUU  |
| ENSG00000164093 | UAUAAAG  |
| ENSG00000164093 | UGACAUC  |
| ENSG00000164093 | UUGACAC  |
| ENSG00000164099 | AGCAGCA  |
| ENSG00000164099 | UCCAUA   |
| ENSG00000164100 | UGCCAGC  |
| ENSG00000164104 | UACAGUU  |
| ENSG00000164104 | UGAAGCU  |
| ENSG00000164107 | ACAUUC   |
| ENSG00000164107 | AAGUGCA  |
| ENSG00000164107 | ACAUUCA  |
| ENSG00000164107 | AUUGCAC  |
| ENSG00000164107 | CACAGUG  |
| ENSG00000164107 | GGAAUGU  |
| ENSG00000164107 | GGUUUAC  |
| ENSG00000164111 | AAGGCAC  |
| ENSG00000164111 | CACAAUG  |
| ENSG00000164112 | AGCAGCU  |
| ENSG00000164112 | CUGCUC A |
| ENSG00000164112 | GGAGUCC  |
| ENSG00000164114 | ACUGCAG  |
| ENSG00000164114 | AGAUAAA  |
| ENSG00000164114 | UCAAGUA  |
| ENSG00000164116 | AGUGCUU  |
| ENSG00000164116 | UAAUACA  |
| ENSG00000164117 | ACAAUAU  |
| ENSG00000164117 | ACAUUAC  |
| ENSG00000164117 | ACCAGCA  |
| ENSG00000164117 | UGUGCUU  |
| ENSG00000164118 | AGGAUGU  |
| ENSG00000164118 | AGUGCUG  |

|                 |          |
|-----------------|----------|
| ENSG00000164118 | GACUUC   |
| ENSG00000164118 | GUAAACA  |
| ENSG00000164118 | GUUCAUG  |
| ENSG00000164124 | GCUGGUG  |
| ENSG00000164142 | AAGGCAC  |
| ENSG00000164142 | AGCAGCU  |
| ENSG00000164142 | CAGGAAC  |
| ENSG00000164142 | UGCAUUAU |
| ENSG00000164144 | AAGGCAC  |
| ENSG00000164144 | GUCAGUU  |
| ENSG00000164151 | AAGACAU  |
| ENSG00000164151 | AAGGCAC  |
| ENSG00000164151 | AGCAAAA  |
| ENSG00000164151 | CAAAGUG  |
| ENSG00000164151 | CUGCAGG  |
| ENSG00000164151 | GCAGCAU  |
| ENSG00000164151 | UCAAGUA  |
| ENSG00000164161 | CCAGUGC  |
| ENSG00000164163 | AACACUG  |
| ENSG00000164163 | UGCAAAG  |
| ENSG00000164163 | UUGGCAA  |
| ENSG00000164164 | AAGGCAC  |
| ENSG00000164164 | AAUACUG  |
| ENSG00000164164 | AAUCACU  |
| ENSG00000164164 | AGCACCA  |
| ENSG00000164164 | AGCAGCA  |
| ENSG00000164164 | AGCAGCG  |
| ENSG00000164164 | AGCAGCU  |
| ENSG00000164164 | AGUAACA  |
| ENSG00000164164 | AUACAAG  |
| ENSG00000164164 | AUUGCAC  |
| ENSG00000164164 | CAAAGUG  |
| ENSG00000164164 | CAAUUGC  |
| ENSG00000164164 | CCAGUGC  |
| ENSG00000164164 | CUACAAA  |
| ENSG00000164164 | CUCACAC  |
| ENSG00000164164 | CUGCCCC  |
| ENSG00000164164 | CUUCACC  |
| ENSG00000164164 | CUUCUCU  |
| ENSG00000164164 | CUUUGGU  |
| ENSG00000164164 | GGAAGCC  |
| ENSG00000164164 | GUCAGUU  |
| ENSG00000164164 | UAAUAUC  |
| ENSG00000164164 | UCCAGAG  |
| ENSG00000164164 | UCCUGAG  |
| ENSG00000164164 | UCUCACC  |
| ENSG00000164164 | UCUCCAA  |
| ENSG00000164164 | UGAAAGG  |
| ENSG00000164164 | UGAGAAU  |
| ENSG00000164164 | UGCAUUAU |
| ENSG00000164164 | UUGACAC  |
| ENSG00000164168 | AAGACAU  |
| ENSG00000164168 | AAGUCUU  |
| ENSG00000164168 | AUACAAG  |
| ENSG00000164168 | UGAAAGG  |
| ENSG00000164168 | UUCCAUA  |
| ENSG00000164171 | AGCCAGU  |
| ENSG00000164171 | CACAGUG  |
| ENSG00000164171 | GGACUGC  |
| ENSG00000164171 | UCACAGG  |
| ENSG00000164171 | UCCUGAG  |
| ENSG00000164181 | AAGUCUU  |
| ENSG00000164181 | GAAGGAA  |
| ENSG00000164181 | GAUUGUA  |

|                 |         |
|-----------------|---------|
| ENSG00000164181 | GCAGAAG |
| ENSG00000164185 | AGAUAAA |
| ENSG00000164190 | AAAAAUC |
| ENSG00000164190 | AAACUGU |
| ENSG00000164190 | AAAGAAU |
| ENSG00000164190 | AACAAAC |
| ENSG00000164190 | AACAUUC |
| ENSG00000164190 | AAGAACC |
| ENSG00000164190 | AAUUAUU |
| ENSG00000164190 | ACAUCAC |
| ENSG00000164190 | ACAUUCA |
| ENSG00000164190 | ACUGCAG |
| ENSG00000164190 | AGGUUAU |
| ENSG00000164190 | AGUAACA |
| ENSG00000164190 | AUACAAG |
| ENSG00000164190 | AUCCCUU |
| ENSG00000164190 | CACAGUG |
| ENSG00000164190 | CUAUACA |
| ENSG00000164190 | CUCCCAC |
| ENSG00000164190 | CUGGAAA |
| ENSG00000164190 | GCCUGGA |
| ENSG00000164190 | GGCUGCG |
| ENSG00000164190 | UACAAAG |
| ENSG00000164190 | UAUUGCU |
| ENSG00000164190 | UCAAGUA |
| ENSG00000164190 | UCAUAGA |
| ENSG00000164190 | UCCACA  |
| ENSG00000164190 | UCCCUUU |
| ENSG00000164190 | UGACCUA |
| ENSG00000164190 | UGCCAGC |
| ENSG00000164190 | UGGCUGC |
| ENSG00000164190 | UGUAUAA |
| ENSG00000164190 | UUCAAAU |
| ENSG00000164190 | UUCAAGC |
| ENSG00000164190 | UUGGCAA |
| ENSG00000164197 | AAGUGCA |
| ENSG00000164197 | AAUCACU |
| ENSG00000164197 | ACCCUGU |
| ENSG00000164197 | AGUGCAA |
| ENSG00000164197 | AUAAAGU |
| ENSG00000164197 | AUGCAUU |
| ENSG00000164197 | GAUAUGU |
| ENSG00000164197 | UAUUGCU |
| ENSG00000164219 | AAAGAAU |
| ENSG00000164219 | AUCACUA |
| ENSG00000164219 | AUGGCUU |
| ENSG00000164219 | CUGGCUC |
| ENSG00000164219 | GAUUGUC |
| ENSG00000164219 | GGCUCAG |
| ENSG00000164219 | GUAAACA |
| ENSG00000164219 | UCUUGAG |
| ENSG00000164219 | UUGGCAC |
| ENSG00000164220 | GGCAGUG |
| ENSG00000164244 | AAGGCAC |
| ENSG00000164244 | GGAAUGU |
| ENSG00000164251 | CAAAACU |
| ENSG00000164252 | CUUCACC |
| ENSG00000164252 | UCACAGG |
| ENSG00000164252 | UCACAGU |
| ENSG00000164258 | AAAGGUA |
| ENSG00000164258 | CACAGUG |
| ENSG00000164270 | AGCAGCG |
| ENSG00000164270 | AGGCAGG |
| ENSG00000164270 | CAAGAGC |

|                 |         |
|-----------------|---------|
| ENSG00000164270 | CCUGCUG |
| ENSG00000164270 | GAGGUAG |
| ENSG00000164270 | GCUGGAU |
| ENSG00000164270 | GGACCUG |
| ENSG00000164283 | AUAUAAC |
| ENSG00000164284 | AAAUCCC |
| ENSG00000164284 | AAUGCCC |
| ENSG00000164284 | AGGUAGU |
| ENSG00000164284 | CUCUGGG |
| ENSG00000164284 | GAGGUAG |
| ENSG00000164284 | GCUUCCU |
| ENSG00000164284 | UGAAAGG |
| ENSG00000164284 | UUCUUGU |
| ENSG00000164292 | AAAGCUG |
| ENSG00000164292 | CAGGCUC |
| ENSG00000164292 | UCCCUUG |
| ENSG00000164292 | UGCAAAG |
| ENSG00000164296 | AAUGUUG |
| ENSG00000164303 | AGGCAGG |
| ENSG00000164303 | AGUGAUC |
| ENSG00000164303 | GAUUGUA |
| ENSG00000164303 | GAUUGUC |
| ENSG00000164303 | UGAAGCU |
| ENSG00000164303 | UUGUGAC |
| ENSG00000164305 | GAGGUAU |
| ENSG00000164305 | GCUGGUG |
| ENSG00000164305 | UUGAGGC |
| ENSG00000164307 | CAGGAAC |
| ENSG00000164307 | GGGUUUA |
| ENSG00000164318 | CUACAAA |
| ENSG00000164318 | CUGGAAA |
| ENSG00000164318 | GAGCUAA |
| ENSG00000164318 | UCCCUUG |
| ENSG00000164318 | UCUGGAA |
| ENSG00000164318 | UGCAGCU |
| ENSG00000164323 | AAAAGUA |
| ENSG00000164326 | AAUUUUA |
| ENSG00000164327 | AAGUGCA |
| ENSG00000164327 | AAUCACU |
| ENSG00000164327 | ACCACAG |
| ENSG00000164327 | ACUGCAU |
| ENSG00000164327 | ACUGUAG |
| ENSG00000164327 | AGCAGCA |
| ENSG00000164327 | AGCAGCU |
| ENSG00000164327 | AGGUAGU |
| ENSG00000164327 | AGUGCUU |
| ENSG00000164327 | AUGUCUG |
| ENSG00000164327 | CACAGGG |
| ENSG00000164327 | CACAGUG |
| ENSG00000164327 | CAGCUGG |
| ENSG00000164327 | CAGUCCA |
| ENSG00000164327 | CUACAAA |
| ENSG00000164327 | CUGGAAA |
| ENSG00000164327 | GAGGUAG |
| ENSG00000164327 | GAGGUAU |
| ENSG00000164327 | GCUGGAU |
| ENSG00000164327 | GGAAUGU |
| ENSG00000164327 | GGCUCUG |
| ENSG00000164327 | GGUCUAG |
| ENSG00000164327 | UCACAGG |
| ENSG00000164327 | UGAAGUG |
| ENSG00000164327 | UGACCUA |
| ENSG00000164327 | UGCAUAG |
| ENSG00000164327 | UGGUACC |

|                 |          |
|-----------------|----------|
| ENSG00000164327 | UUGGAGG  |
| ENSG00000164327 | UUGGCAA  |
| ENSG00000164327 | UUGGUCC  |
| ENSG00000164327 | UUUUUGC  |
| ENSG00000164330 | AAAAGUA  |
| ENSG00000164330 | AAAGGUA  |
| ENSG00000164330 | AAAGUAU  |
| ENSG00000164330 | AAAUCCC  |
| ENSG00000164330 | AAGGCAC  |
| ENSG00000164330 | AAUCUCU  |
| ENSG00000164330 | ACAUUAC  |
| ENSG00000164330 | AGGUAGU  |
| ENSG00000164330 | AGUAGUU  |
| ENSG00000164330 | AUAAUAC  |
| ENSG00000164330 | AUGGAUU  |
| ENSG00000164330 | CAGACAG  |
| ENSG00000164330 | CAGUAGU  |
| ENSG00000164330 | GCAGCAU  |
| ENSG00000164330 | GCCUGGA  |
| ENSG00000164330 | GCUGGUG  |
| ENSG00000164330 | GUCACUC  |
| ENSG00000164330 | UACAAAG  |
| ENSG00000164330 | UAGUGAG  |
| ENSG00000164330 | UAUAUGA  |
| ENSG00000164330 | UCACAUU  |
| ENSG00000164330 | UGCAUUA  |
| ENSG00000164330 | UUGGCAC  |
| ENSG00000164338 | AAAUCCC  |
| ENSG00000164338 | GAGGUAG  |
| ENSG00000164379 | AAAGUGC  |
| ENSG00000164379 | AAGUGCA  |
| ENSG00000164379 | CACAGUG  |
| ENSG00000164379 | CAGUAGU  |
| ENSG00000164379 | CCCUGAG  |
| ENSG00000164379 | CUUUGGU  |
| ENSG00000164379 | UUGGCAA  |
| ENSG00000164385 | CAGCAGG  |
| ENSG00000164398 | GAGGUAU  |
| ENSG00000164398 | GGCUCAG  |
| ENSG00000164398 | UAUUGCU  |
| ENSG00000164400 | AUAU AAC |
| ENSG00000164402 | CCCACCU  |
| ENSG00000164402 | GUGAAUG  |
| ENSG00000164402 | UAUUACC  |
| ENSG00000164406 | UCCCAUA  |
| ENSG00000164411 | UCUGGAA  |
| ENSG00000164414 | UUGGCAA  |
| ENSG00000164418 | AAAAAUC  |
| ENSG00000164418 | AAAUUUC  |
| ENSG00000164418 | ACACACC  |
| ENSG00000164418 | ACACACU  |
| ENSG00000164418 | ACAUUCA  |
| ENSG00000164418 | ACGCACU  |
| ENSG00000164418 | ACUGUGU  |
| ENSG00000164418 | AGUGCAA  |
| ENSG00000164418 | CACACCG  |
| ENSG00000164418 | CACACCU  |
| ENSG00000164418 | CAGCAAA  |
| ENSG00000164418 | CAGUCCA  |
| ENSG00000164418 | GAAACAU  |
| ENSG00000164418 | GAGGUAG  |
| ENSG00000164418 | GAGGUAU  |
| ENSG00000164418 | GGUGGUC  |
| ENSG00000164418 | GGUGGUU  |

|                 |         |
|-----------------|---------|
| ENSG00000164418 | UACAAAG |
| ENSG00000164418 | UGACAUC |
| ENSG00000164418 | UGCAUAG |
| ENSG00000164418 | UGUCUUU |
| ENSG00000164418 | UGUGCUU |
| ENSG00000164418 | UGUUGAA |
| ENSG00000164418 | UUGUUCG |
| ENSG00000164438 | AAAAGUA |
| ENSG00000164438 | AAAGAAU |
| ENSG00000164438 | AAAGUAC |
| ENSG00000164438 | AAAGUAU |
| ENSG00000164438 | AUAAUAC |
| ENSG00000164438 | UACAAAG |
| ENSG00000164440 | ACCCUGU |
| ENSG00000164440 | GCUGGAU |
| ENSG00000164440 | UGGCUGC |
| ENSG00000164440 | UGUUGAA |
| ENSG00000164442 | AAAUUUC |
| ENSG00000164442 | CACAGUG |
| ENSG00000164442 | GUUCAUG |
| ENSG00000164442 | UGAAAUG |
| ENSG00000164458 | GAUUGUA |
| ENSG00000164458 | GCAGAAG |
| ENSG00000164463 | AAAUUUC |
| ENSG00000164463 | AAGGCAC |
| ENSG00000164463 | AAGUCAC |
| ENSG00000164463 | AAGUGCA |
| ENSG00000164463 | ACAAGGU |
| ENSG00000164463 | ACAGUAC |
| ENSG00000164463 | ACAGUAU |
| ENSG00000164463 | AGCAGCG |
| ENSG00000164463 | AGCAUUC |
| ENSG00000164463 | AUCAUAC |
| ENSG00000164463 | CACAGUG |
| ENSG00000164463 | CCUUCUG |
| ENSG00000164463 | CUGCAGC |
| ENSG00000164463 | GGCAGGG |
| ENSG00000164463 | GGCAGUG |
| ENSG00000164463 | UAGACUG |
| ENSG00000164463 | UCAACAG |
| ENSG00000164463 | UCACAGG |
| ENSG00000164463 | UCCUAUA |
| ENSG00000164463 | UCGCUGC |
| ENSG00000164463 | UGGUACC |
| ENSG00000164466 | GUAAACA |
| ENSG00000164494 | AAAAAUC |
| ENSG00000164494 | AAAGGUA |
| ENSG00000164494 | AAGUGUG |
| ENSG00000164494 | ACCACAG |
| ENSG00000164494 | ACUCAGC |
| ENSG00000164494 | AGUGUGC |
| ENSG00000164494 | AUGUAAU |
| ENSG00000164494 | CCUUCUU |
| ENSG00000164494 | CUCCAGC |
| ENSG00000164494 | GAAAACA |
| ENSG00000164494 | GCUGUCU |
| ENSG00000164494 | GGCGCCU |
| ENSG00000164494 | GUAAACA |
| ENSG00000164494 | GUCAACA |
| ENSG00000164494 | GUGCUUG |
| ENSG00000164494 | GUUAAUG |
| ENSG00000164494 | UCACAGG |
| ENSG00000164494 | UGACCUA |
| ENSG00000164494 | UGCAGCU |

|                 |          |
|-----------------|----------|
| ENSG00000164494 | UGCUGAC  |
| ENSG00000164494 | UGUGCUU  |
| ENSG00000164494 | UUCUGCA  |
| ENSG00000164494 | UUCUUGU  |
| ENSG00000164506 | GAGGUAG  |
| ENSG00000164506 | GAGGUAU  |
| ENSG00000164508 | AAAGAGC  |
| ENSG00000164512 | AUGGCUU  |
| ENSG00000164530 | CCUUCAU  |
| ENSG00000164542 | CAAAGCA  |
| ENSG00000164542 | GCACCAU  |
| ENSG00000164543 | CAAAGUG  |
| ENSG00000164543 | GAUCAGA  |
| ENSG00000164543 | UCCUAG   |
| ENSG00000164548 | AAAUUUC  |
| ENSG00000164548 | CCUUCAU  |
| ENSG00000164548 | GAAAACA  |
| ENSG00000164574 | AAAUGGU  |
| ENSG00000164574 | AGCAAAA  |
| ENSG00000164574 | CAGCUGG  |
| ENSG00000164574 | GAGAACU  |
| ENSG00000164574 | GCAGGUU  |
| ENSG00000164574 | GGAUUUC  |
| ENSG00000164574 | GGCAGGG  |
| ENSG00000164574 | UGCAAAG  |
| ENSG00000164588 | AAAUGGU  |
| ENSG00000164588 | AAGACAU  |
| ENSG00000164588 | ACAAUUAU |
| ENSG00000164588 | AGCAGCA  |
| ENSG00000164588 | AUAUUAU  |
| ENSG00000164588 | AUGCCUU  |
| ENSG00000164588 | CCCUGAG  |
| ENSG00000164588 | GACCAUG  |
| ENSG00000164588 | GGAAUGU  |
| ENSG00000164588 | GUCUUGC  |
| ENSG00000164591 | CAGGCUC  |
| ENSG00000164600 | ACACACU  |
| ENSG00000164600 | ACUGUUU  |
| ENSG00000164600 | CACUGUU  |
| ENSG00000164600 | GUGAAUG  |
| ENSG00000164600 | UCAUUUG  |
| ENSG00000164600 | UCCUCG   |
| ENSG00000164603 | AAAAACC  |
| ENSG00000164603 | AAAAAUC  |
| ENSG00000164603 | AAAGUGC  |
| ENSG00000164603 | AAUUGCU  |
| ENSG00000164603 | ACAUUCA  |
| ENSG00000164603 | AUGUAAU  |
| ENSG00000164603 | CACAGUG  |
| ENSG00000164603 | CUGACUC  |
| ENSG00000164603 | GAGGUAG  |
| ENSG00000164603 | GAGGUAU  |
| ENSG00000164603 | GUCAACA  |
| ENSG00000164603 | GUGCUUG  |
| ENSG00000164603 | UCCACA   |
| ENSG00000164603 | UGUCUUU  |
| ENSG00000164603 | UUGUUCG  |
| ENSG00000164604 | AAAGAAU  |
| ENSG00000164604 | AAAGUAU  |
| ENSG00000164604 | AAAUUUC  |
| ENSG00000164604 | AAGGCAC  |
| ENSG00000164604 | AAGUCUU  |
| ENSG00000164604 | AAUCCUU  |
| ENSG00000164604 | AAUUGCU  |



|                 |          |
|-----------------|----------|
| ENSG00000164604 | ACAAGGU  |
| ENSG00000164604 | ACAGUAU  |
| ENSG00000164604 | AGCACCA  |
| ENSG00000164604 | AGUGGUU  |
| ENSG00000164604 | AUUGCAC  |
| ENSG00000164604 | CAA AUGC |
| ENSG00000164604 | CAGUAGA  |
| ENSG00000164604 | CAGUAGU  |
| ENSG00000164604 | CUGCUCA  |
| ENSG00000164604 | CUUCUCU  |
| ENSG00000164604 | GCAGAAG  |
| ENSG00000164604 | GUAGUGU  |
| ENSG00000164604 | GUGCCUG  |
| ENSG00000164604 | GUGCUUG  |
| ENSG00000164604 | UACAAAG  |
| ENSG00000164604 | UAGGGCC  |
| ENSG00000164604 | UCACACA  |
| ENSG00000164604 | UCUCAAG  |
| ENSG00000164604 | UCUUGAG  |
| ENSG00000164604 | UGCAU AU |
| ENSG00000164604 | UGUGCUU  |
| ENSG00000164604 | UUCUAAU  |
| ENSG00000164604 | UUGGCAA  |
| ENSG00000164604 | UUUGCAA  |
| ENSG00000164609 | GAGAUGA  |
| ENSG00000164609 | UGUUGAA  |
| ENSG00000164615 | GAGACCU  |
| ENSG00000164615 | UCACAAG  |
| ENSG00000164619 | AAAAACC  |
| ENSG00000164619 | AAUGCCC  |
| ENSG00000164619 | AGAUAAA  |
| ENSG00000164619 | AGGCAGG  |
| ENSG00000164619 | AUAAUAC  |
| ENSG00000164619 | AUACAAG  |
| ENSG00000164619 | AUGGCUU  |
| ENSG00000164619 | CUCCAGC  |
| ENSG00000164619 | CUCUUCC  |
| ENSG00000164619 | CUUACAG  |
| ENSG00000164619 | GGCUCUG  |
| ENSG00000164619 | GUGCAAA  |
| ENSG00000164619 | UAGGGCC  |
| ENSG00000164619 | UAUAAUA  |
| ENSG00000164619 | UCCAGAG  |
| ENSG00000164619 | UCUCCAA  |
| ENSG00000164619 | UGAAAUG  |
| ENSG00000164619 | UGGACUG  |
| ENSG00000164619 | UUAGGAU  |
| ENSG00000164620 | UAUUGCU  |
| ENSG00000164626 | CCCCUGG  |
| ENSG00000164626 | CUGGCUC  |
| ENSG00000164626 | GAGAACC  |
| ENSG00000164626 | GGGAGC   |
| ENSG00000164626 | GUGGGGA  |
| ENSG00000164627 | AGGAGCU  |
| ENSG00000164631 | CAGUCCA  |
| ENSG00000164631 | CCCUGAG  |
| ENSG00000164631 | UCCCUGU  |
| ENSG00000164649 | AAUUGCU  |
| ENSG00000164649 | AGCAGCA  |
| ENSG00000164649 | AUUGCAC  |
| ENSG00000164649 | CAGCAGG  |
| ENSG00000164649 | CCAGUGC  |
| ENSG00000164649 | GAAGGAA  |
| ENSG00000164649 | GUGCUUG  |

|                 |          |
|-----------------|----------|
| ENSG00000164651 | AAAGUGC  |
| ENSG00000164651 | AAUUAUU  |
| ENSG00000164651 | ACAUUAC  |
| ENSG00000164651 | ACUGGAU  |
| ENSG00000164651 | ACUUGGA  |
| ENSG00000164651 | AGCAAAA  |
| ENSG00000164651 | AUACAAG  |
| ENSG00000164651 | AUGCAUU  |
| ENSG00000164651 | CAAAACU  |
| ENSG00000164651 | CAA AUGC |
| ENSG00000164651 | CACACCG  |
| ENSG00000164651 | CACACCU  |
| ENSG00000164651 | CAGCAAA  |
| ENSG00000164651 | CAGGAAC  |
| ENSG00000164651 | CAUAUUG  |
| ENSG00000164651 | CCAUUAC  |
| ENSG00000164651 | CUCACAC  |
| ENSG00000164651 | CUCCA UU |
| ENSG00000164651 | GACAACU  |
| ENSG00000164651 | GAGAACU  |
| ENSG00000164651 | GAGGUAG  |
| ENSG00000164651 | GCAGAAG  |
| ENSG00000164651 | GCCUGAU  |
| ENSG00000164651 | GGCUCUG  |
| ENSG00000164651 | GGGAUCG  |
| ENSG00000164651 | GGGUUUA  |
| ENSG00000164651 | UCAACAG  |
| ENSG00000164651 | UCAUUUG  |
| ENSG00000164651 | UCCAGAG  |
| ENSG00000164651 | UCCAGUU  |
| ENSG00000164651 | UCUCACC  |
| ENSG00000164651 | UGCAUAG  |
| ENSG00000164651 | UGCAUAU  |
| ENSG00000164651 | UGCCAGC  |
| ENSG00000164651 | UUUGCAA  |
| ENSG00000164651 | UUUGCAC  |
| ENSG00000164651 | UUUUUGC  |
| ENSG00000164659 | AAGGCAC  |
| ENSG00000164659 | AAUCUCU  |
| ENSG00000164659 | CAGUGCA  |
| ENSG00000164659 | GAGUUGG  |
| ENSG00000164659 | UUGGCAC  |
| ENSG00000164663 | GAAGGAA  |
| ENSG00000164663 | GUAUGUU  |
| ENSG00000164663 | UGUAUGU  |
| ENSG00000164683 | GUCAACA  |
| ENSG00000164684 | AAAAAUC  |
| ENSG00000164684 | AAAGUGC  |
| ENSG00000164684 | AACAUUC  |
| ENSG00000164684 | AAGGUGC  |
| ENSG00000164684 | AAGUGCA  |
| ENSG00000164684 | AUAUUAU  |
| ENSG00000164684 | AUGCAUU  |
| ENSG00000164684 | AUGGCUU  |
| ENSG00000164684 | CCCUGAG  |
| ENSG00000164684 | CCUGCUG  |
| ENSG00000164684 | GUGCAAA  |
| ENSG00000164684 | UCCUAUA  |
| ENSG00000164684 | UGCAUAG  |
| ENSG00000164684 | UGUAUGU  |
| ENSG00000164684 | UUGGCAA  |
| ENSG00000164684 | UUUUUGC  |
| ENSG00000164691 | AGCUUAU  |
| ENSG00000164691 | AGGAGCU  |

|                 |          |
|-----------------|----------|
| ENSG00000164691 | GUAGUGU  |
| ENSG00000164692 | AGGUAGU  |
| ENSG00000164692 | AUACAAG  |
| ENSG00000164692 | CUCACAC  |
| ENSG00000164692 | GAGGUAU  |
| ENSG00000164692 | GGAAGAC  |
| ENSG00000164695 | AAUUGCU  |
| ENSG00000164695 | CCAGGAG  |
| ENSG00000164713 | ACAUUAC  |
| ENSG00000164713 | UACAAAG  |
| ENSG00000164715 | ACAUUCA  |
| ENSG00000164715 | AGUGCAA  |
| ENSG00000164715 | AUGGCUU  |
| ENSG00000164715 | CACAGUG  |
| ENSG00000164715 | GGCUCAG  |
| ENSG00000164715 | UUCCUAG  |
| ENSG00000164733 | AAAGCUG  |
| ENSG00000164733 | CAGCAGG  |
| ENSG00000164733 | CCCUGUC  |
| ENSG00000164733 | GUCUUGC  |
| ENSG00000164733 | UCCUUGC  |
| ENSG00000164733 | UUGGCAC  |
| ENSG00000164736 | AACACUG  |
| ENSG00000164736 | AAGUGUG  |
| ENSG00000164736 | GGAUUUC  |
| ENSG00000164736 | UCAAGUA  |
| ENSG00000164741 | AACUCUA  |
| ENSG00000164741 | AAGAACC  |
| ENSG00000164741 | ACAAUUAU |
| ENSG00000164741 | ACAGUAC  |
| ENSG00000164741 | ACAGUAU  |
| ENSG00000164741 | AGCAGCU  |
| ENSG00000164741 | AGUGCAA  |
| ENSG00000164741 | AGUGUGC  |
| ENSG00000164741 | CACUCCU  |
| ENSG00000164741 | CCAGUGC  |
| ENSG00000164741 | CCAGUGU  |
| ENSG00000164741 | CCUUCUG  |
| ENSG00000164741 | GCUUCCU  |
| ENSG00000164741 | GUGCAAA  |
| ENSG00000164741 | GUGCCAC  |
| ENSG00000164741 | UACAAAG  |
| ENSG00000164741 | UACAGUU  |
| ENSG00000164742 | AAAGUAU  |
| ENSG00000164742 | AACAGUC  |
| ENSG00000164742 | AAGGCAC  |
| ENSG00000164742 | AAUUAUU  |
| ENSG00000164742 | ACAGUAU  |
| ENSG00000164742 | AGCAUUC  |
| ENSG00000164742 | AGGACAC  |
| ENSG00000164742 | AUAAUAC  |
| ENSG00000164742 | AUGGCUU  |
| ENSG00000164742 | CAGUAGU  |
| ENSG00000164742 | CCCUGAG  |
| ENSG00000164742 | CUGCUCU  |
| ENSG00000164742 | GCCUGGG  |
| ENSG00000164742 | GCUGGUG  |
| ENSG00000164742 | GGUGGGC  |
| ENSG00000164742 | GUGCUUG  |
| ENSG00000164742 | UAAUACA  |
| ENSG00000164742 | UACAAAG  |
| ENSG00000164742 | UACAGUU  |
| ENSG00000164742 | UAUAAUA  |
| ENSG00000164742 | UAUUGCU  |

|                 |          |
|-----------------|----------|
| ENSG00000164742 | UGCAUUAU |
| ENSG00000164742 | UGGUACC  |
| ENSG00000164742 | UGUGCUU  |
| ENSG00000164742 | UUAGAGA  |
| ENSG00000164749 | AGCACCA  |
| ENSG00000164749 | CACAGUG  |
| ENSG00000164749 | GGCAGUG  |
| ENSG00000164749 | GUAAACA  |
| ENSG00000164754 | AACAUUC  |
| ENSG00000164754 | CUACAAA  |
| ENSG00000164754 | UCAUGAU  |
| ENSG00000164754 | UGUCUUU  |
| ENSG00000164756 | AAGUAGC  |
| ENSG00000164756 | ACAGGUG  |
| ENSG00000164756 | AGAUGUG  |
| ENSG00000164756 | AGUAACA  |
| ENSG00000164756 | AUGAGCU  |
| ENSG00000164756 | AUGGCAC  |
| ENSG00000164756 | CAAAGUG  |
| ENSG00000164756 | CACUGUU  |
| ENSG00000164756 | CAGCAGA  |
| ENSG00000164756 | CAGCAGG  |
| ENSG00000164756 | CUGGACU  |
| ENSG00000164756 | GAGCUGC  |
| ENSG00000164756 | GGACUGC  |
| ENSG00000164778 | AAAAAUC  |
| ENSG00000164778 | AACAUUC  |
| ENSG00000164778 | AAGGCAC  |
| ENSG00000164778 | AAGUUGU  |
| ENSG00000164778 | AAUUAAU  |
| ENSG00000164778 | ACAAUUAU |
| ENSG00000164778 | ACCACAG  |
| ENSG00000164778 | AGCAGCA  |
| ENSG00000164778 | AUUCAUU  |
| ENSG00000164778 | AUUGCAC  |
| ENSG00000164778 | CACAAUG  |
| ENSG00000164778 | CACACCU  |
| ENSG00000164778 | CACAGUG  |
| ENSG00000164778 | CAGCAA   |
| ENSG00000164778 | CAGCAGA  |
| ENSG00000164778 | CUUUGGU  |
| ENSG00000164778 | GCAGCAU  |
| ENSG00000164778 | GGCCUG   |
| ENSG00000164778 | UAAUACA  |
| ENSG00000164778 | UAUUGCU  |
| ENSG00000164778 | UCACAAG  |
| ENSG00000164778 | UCACAGG  |
| ENSG00000164778 | UCAUAGA  |
| ENSG00000164778 | UCAUUUG  |
| ENSG00000164778 | UGAAAUG  |
| ENSG00000164778 | UGGACUG  |
| ENSG00000164778 | UGGCCCU  |
| ENSG00000164796 | AAGUGUG  |
| ENSG00000164796 | ACAUCAC  |
| ENSG00000164796 | AGUGUGC  |
| ENSG00000164796 | AUAAAGU  |
| ENSG00000164796 | CAGGAAC  |
| ENSG00000164796 | GUGCUUG  |
| ENSG00000164796 | UAUUGCU  |
| ENSG00000164796 | UCCAGUU  |
| ENSG00000164796 | UGUGCUU  |
| ENSG00000164808 | UCACAGG  |
| ENSG00000164815 | AGCAAAA  |
| ENSG00000164815 | AUGGCUU  |

|                 |         |
|-----------------|---------|
| ENSG00000164815 | CCUGCUG |
| ENSG00000164815 | UAUAAUA |
| ENSG00000164815 | UGAAGCU |
| ENSG00000164823 | AAACUGU |
| ENSG00000164823 | AAAGAAU |
| ENSG00000164823 | AAGUAGC |
| ENSG00000164823 | AGCCAGU |
| ENSG00000164823 | CCAGUAC |
| ENSG00000164823 | CCAGUGU |
| ENSG00000164823 | GAAAACA |
| ENSG00000164823 | GUCCAGA |
| ENSG00000164823 | UCACACA |
| ENSG00000164823 | UUCAAGC |
| ENSG00000164849 | AAGUGCU |
| ENSG00000164849 | AAUACUG |
| ENSG00000164855 | AAAUUUC |
| ENSG00000164855 | AAUUAUU |
| ENSG00000164855 | ACUGUAG |
| ENSG00000164855 | CACCACC |
| ENSG00000164855 | CUACAGU |
| ENSG00000164855 | GUGACUG |
| ENSG00000164855 | UAUUGCU |
| ENSG00000164855 | UGUGCUU |
| ENSG00000164855 | UUUGCAA |
| ENSG00000164879 | UGCAAAG |
| ENSG00000164885 | AUAAAGU |
| ENSG00000164889 | AAUUAUU |
| ENSG00000164896 | AAAGUGC |
| ENSG00000164896 | AAGUGCA |
| ENSG00000164896 | AGUGCAA |
| ENSG00000164896 | CAAAGUG |
| ENSG00000164896 | GUGCAAA |
| ENSG00000164916 | AAAACUG |
| ENSG00000164916 | AAUACUG |
| ENSG00000164916 | ACAUUCA |
| ENSG00000164916 | ACUGUAG |
| ENSG00000164916 | AGCAGCA |
| ENSG00000164916 | AGCAGCG |
| ENSG00000164916 | AUCAUAC |
| ENSG00000164916 | AUGGCUU |
| ENSG00000164916 | UAAUAGU |
| ENSG00000164916 | UAAUAUC |
| ENSG00000164916 | UAAUGCU |
| ENSG00000164916 | UCAUACA |
| ENSG00000164916 | UCCUGAG |
| ENSG00000164916 | UGUCUGC |
| ENSG00000164916 | UGUCUGG |
| ENSG00000164920 | AUGAGCU |
| ENSG00000164924 | AAAACUG |
| ENSG00000164924 | AAAAGUA |
| ENSG00000164924 | AAAGCUG |
| ENSG00000164924 | AACCGUU |
| ENSG00000164924 | AACCGU  |
| ENSG00000164924 | AACUGGU |
| ENSG00000164924 | ACCACAG |
| ENSG00000164924 | ACUGGCC |
| ENSG00000164924 | ACUGGCU |
| ENSG00000164924 | AUCCCUU |
| ENSG00000164924 | AUUCAUU |
| ENSG00000164924 | CACAAUG |
| ENSG00000164924 | CAUAUUG |
| ENSG00000164924 | CAUGGAU |
| ENSG00000164924 | CCCUGUC |
| ENSG00000164924 | CUGGCUC |

|                 |         |
|-----------------|---------|
| ENSG00000164924 | GGCUCUG |
| ENSG00000164924 | GGUCUAG |
| ENSG00000164924 | GUCUACU |
| ENSG00000164924 | GUUAGGA |
| ENSG00000164924 | UAAUACA |
| ENSG00000164924 | UAAUGCU |
| ENSG00000164924 | UACAAAG |
| ENSG00000164924 | UCAUGAU |
| ENSG00000164924 | UCAUUUG |
| ENSG00000164924 | UCCCUUU |
| ENSG00000164924 | UCUCAAG |
| ENSG00000164924 | UGUGCUU |
| ENSG00000164924 | UUGUUCG |
| ENSG00000164929 | ACAUUAC |
| ENSG00000164929 | CACAGGG |
| ENSG00000164929 | UCACAGG |
| ENSG00000164930 | CCAGUGC |
| ENSG00000164930 | GUGCAAA |
| ENSG00000164932 | CUUUGGU |
| ENSG00000164932 | GAGGUAG |
| ENSG00000164933 | AUGGCUU |
| ENSG00000164933 | UUCUAAU |
| ENSG00000164938 | AAGGCAC |
| ENSG00000164938 | AAGUGCU |
| ENSG00000164938 | ACAGUAC |
| ENSG00000164938 | ACAGUAU |
| ENSG00000164938 | AGCACCA |
| ENSG00000164938 | AGUGCUG |
| ENSG00000164938 | AGUGUGC |
| ENSG00000164938 | CAAAGUG |
| ENSG00000164938 | CCUGAG  |
| ENSG00000164938 | CCUUCAU |
| ENSG00000164938 | GACCAUG |
| ENSG00000164938 | GGCUCAG |
| ENSG00000164938 | GUAAACA |
| ENSG00000164938 | GUGAGGU |
| ENSG00000164938 | GUGCAAA |
| ENSG00000164938 | GUUCAUG |
| ENSG00000164938 | UCACAAG |
| ENSG00000164938 | UCCCUUU |
| ENSG00000164938 | UGCAUAG |
| ENSG00000164938 | UUGGCAC |
| ENSG00000164949 | AAAAACC |
| ENSG00000164953 | AAAAAUC |
| ENSG00000164970 | AACCUGG |
| ENSG00000164970 | AAGGCAC |
| ENSG00000164970 | AAUACUG |
| ENSG00000164970 | ACAAGGU |
| ENSG00000164970 | ACACACC |
| ENSG00000164970 | ACACGGG |
| ENSG00000164970 | AGCAGCA |
| ENSG00000164970 | AUAUUAU |
| ENSG00000164970 | CACACCU |
| ENSG00000164970 | CAGCAAA |
| ENSG00000164970 | CUACAAA |
| ENSG00000164970 | CUCAGGG |
| ENSG00000164970 | GCAGAAG |
| ENSG00000164970 | GCAGCAU |
| ENSG00000164970 | GGAAGCC |
| ENSG00000164970 | GGAGUGU |
| ENSG00000164970 | GGCUCUG |
| ENSG00000164970 | GGGGCAG |
| ENSG00000164970 | UGACUGU |
| ENSG00000164970 | UUGGUUC |

|                 |          |
|-----------------|----------|
| ENSG00000164970 | UUGUGUC  |
| ENSG00000164976 | GAGGCAG  |
| ENSG00000164976 | GUGCUUG  |
| ENSG00000164976 | GUUAGGA  |
| ENSG00000164976 | UCCACC   |
| ENSG00000164976 | UGAAAGG  |
| ENSG00000164976 | UUCUGCA  |
| ENSG00000164983 | ACAUUAC  |
| ENSG00000164983 | AGCCCUU  |
| ENSG00000164983 | CAAAGCA  |
| ENSG00000164983 | CUAUACA  |
| ENSG00000164983 | GAGAAGA  |
| ENSG00000164983 | GAGGUAG  |
| ENSG00000164983 | GAGGUAU  |
| ENSG00000164983 | GCACCAU  |
| ENSG00000164983 | GUAUUCU  |
| ENSG00000164983 | UAGGUAU  |
| ENSG00000164983 | UUGUUCG  |
| ENSG00000164985 | AAAGAGG  |
| ENSG00000164985 | ACACACC  |
| ENSG00000164985 | ACUGCAG  |
| ENSG00000164985 | ACUGCAU  |
| ENSG00000164985 | AGUAACA  |
| ENSG00000164985 | AUGCACC  |
| ENSG00000164985 | CAAUUGC  |
| ENSG00000164985 | CAGCAGA  |
| ENSG00000164985 | CAGCAGG  |
| ENSG00000164985 | GUUAAUG  |
| ENSG00000164985 | UAAUACA  |
| ENSG00000164985 | UAUAAAAG |
| ENSG00000165006 | AACAAAC  |
| ENSG00000165006 | AGCAAAA  |
| ENSG00000165006 | AGCAGCA  |
| ENSG00000165006 | AGGACAC  |
| ENSG00000165006 | AGUGCUG  |
| ENSG00000165006 | AUAAUAC  |
| ENSG00000165006 | GGCAGGG  |
| ENSG00000165023 | AAAGAAU  |
| ENSG00000165023 | AAAGUAU  |
| ENSG00000165023 | ACAUCAC  |
| ENSG00000165023 | AUGGCUU  |
| ENSG00000165023 | CAAAGUG  |
| ENSG00000165023 | CACAGUG  |
| ENSG00000165023 | CCAGGAG  |
| ENSG00000165023 | CUUACAG  |
| ENSG00000165023 | GAUAUGU  |
| ENSG00000165023 | GGAGGAG  |
| ENSG00000165023 | GUCUUGC  |
| ENSG00000165023 | GUGCUUG  |
| ENSG00000165023 | UCCACA   |
| ENSG00000165023 | UGUGCUU  |
| ENSG00000165023 | UUCAAAU  |
| ENSG00000165029 | AAAGUUU  |
| ENSG00000165029 | AAGGCAC  |
| ENSG00000165029 | AAGUGCU  |
| ENSG00000165029 | AAUACUG  |
| ENSG00000165029 | AGCAGCU  |
| ENSG00000165029 | AGUGCAA  |
| ENSG00000165029 | AGUGCUU  |
| ENSG00000165029 | AGUGGUU  |
| ENSG00000165029 | AUGGCAC  |
| ENSG00000165029 | CAGUAGU  |
| ENSG00000165029 | CCAGUGU  |
| ENSG00000165029 | CCAUUAC  |

|                 |         |
|-----------------|---------|
| ENSG00000165029 | CUGCCCC |
| ENSG00000165029 | CUUUGGU |
| ENSG00000165029 | GGAAUGU |
| ENSG00000165029 | GUGCUUG |
| ENSG00000165029 | UCAAGUA |
| ENSG00000165029 | UCACAGG |
| ENSG00000165029 | UCACAUU |
| ENSG00000165029 | UUGGCAC |
| ENSG00000165029 | UUUGCAC |
| ENSG00000165030 | CAGUAGU |
| ENSG00000165030 | UGAAAUG |
| ENSG00000165055 | UCACAAG |
| ENSG00000165060 | UGUCUUU |
| ENSG00000165071 | AAAUGGU |
| ENSG00000165071 | ACAUUCA |
| ENSG00000165072 | ACUGCAU |
| ENSG00000165072 | CCCUGAG |
| ENSG00000165072 | GUAACAG |
| ENSG00000165072 | UGCAAAG |
| ENSG00000165084 | AUGCAUU |
| ENSG00000165102 | CAGACAG |
| ENSG00000165119 | AAUGUUG |
| ENSG00000165119 | ACAUUAC |
| ENSG00000165119 | AGAUAAA |
| ENSG00000165119 | CAGCAA  |
| ENSG00000165119 | CCUUCAU |
| ENSG00000165119 | CUUCACC |
| ENSG00000165119 | GGAAUGU |
| ENSG00000165120 | AAAGAGC |
| ENSG00000165124 | AACAAAC |
| ENSG00000165124 | AGCACCA |
| ENSG00000165124 | CAGCAGA |
| ENSG00000165124 | GAGAUGA |
| ENSG00000165124 | GCACCAU |
| ENSG00000165124 | GCAGCAU |
| ENSG00000165124 | UAAUAUC |
| ENSG00000165125 | AAGUGCU |
| ENSG00000165131 | GACCUGG |
| ENSG00000165131 | GGCCUG  |
| ENSG00000165138 | CUCUGGG |
| ENSG00000165138 | CUGGGCA |
| ENSG00000165138 | UUUGCAA |
| ENSG00000165152 | AGUGCCU |
| ENSG00000165152 | CCAGUGC |
| ENSG00000165152 | GAGGCAG |
| ENSG00000165152 | GUGUGGC |
| ENSG00000165152 | UGUGUGG |
| ENSG00000165156 | AGUGGUU |
| ENSG00000165156 | CACAGUG |
| ENSG00000165156 | UUGGCAA |
| ENSG00000165156 | UUGGUCC |
| ENSG00000165168 | CAGCUGG |
| ENSG00000165168 | GGCAGCG |
| ENSG00000165168 | UCAUUCG |
| ENSG00000165168 | UGCAAAG |
| ENSG00000165168 | UGUUGAA |
| ENSG00000165168 | UUAGAGA |
| ENSG00000165169 | GACUUCC |
| ENSG00000165175 | AAAACUG |
| ENSG00000165175 | AAGGCAC |
| ENSG00000165175 | CACAAUG |
| ENSG00000165175 | CCUUCAU |
| ENSG00000165175 | GUGCAA  |
| ENSG00000165175 | UGUGCGG |



|                 |          |
|-----------------|----------|
| ENSG00000165175 | UGUGCGU  |
| ENSG00000165175 | UUGGUUC  |
| ENSG00000165185 | AACCUGU  |
| ENSG00000165185 | AAGGCAC  |
| ENSG00000165186 | AAGUGCU  |
| ENSG00000165186 | AGUGUGC  |
| ENSG00000165186 | AUUCAUU  |
| ENSG00000165186 | CACUGUU  |
| ENSG00000165186 | GCUACAU  |
| ENSG00000165186 | GGAGAGA  |
| ENSG00000165186 | UCUCAAG  |
| ENSG00000165188 | AGCCCUU  |
| ENSG00000165188 | CUACAAA  |
| ENSG00000165188 | CUUCUCU  |
| ENSG00000165188 | UUGGCAA  |
| ENSG00000165194 | AAAGAGC  |
| ENSG00000165194 | AAGGCAC  |
| ENSG00000165194 | AGAUAAA  |
| ENSG00000165194 | AGGUAGU  |
| ENSG00000165194 | AUAAAGU  |
| ENSG00000165194 | AUAAUAC  |
| ENSG00000165194 | AUACAAG  |
| ENSG00000165194 | AUAU AAC |
| ENSG00000165194 | CAAGAGC  |
| ENSG00000165194 | CACUGUU  |
| ENSG00000165194 | CAGACAG  |
| ENSG00000165194 | CAGCUGG  |
| ENSG00000165194 | CUACAAA  |
| ENSG00000165194 | CUGGAAA  |
| ENSG00000165194 | CUGUUGA  |
| ENSG00000165194 | GACAACU  |
| ENSG00000165194 | GAGGUAG  |
| ENSG00000165194 | GAGGU AU |
| ENSG00000165194 | GUAAACA  |
| ENSG00000165194 | UAUAAAG  |
| ENSG00000165194 | UAUAAUA  |
| ENSG00000165194 | UAUUACC  |
| ENSG00000165194 | UGACCUA  |
| ENSG00000165194 | UGGCCCU  |
| ENSG00000165194 | UGUGUCA  |
| ENSG00000165194 | UGUUGAA  |
| ENSG00000165195 | AAGUGCU  |
| ENSG00000165195 | AGCAGCU  |
| ENSG00000165195 | CUGCUC A |
| ENSG00000165195 | CUGGGCA  |
| ENSG00000165195 | GAGGUAG  |
| ENSG00000165195 | GGAUUUC  |
| ENSG00000165195 | GGCUCUG  |
| ENSG00000165195 | UAUCAGA  |
| ENSG00000165197 | CAAAGCA  |
| ENSG00000165197 | GCAACU U |
| ENSG00000165197 | GUGACAG  |
| ENSG00000165197 | UUGGCAA  |
| ENSG00000165209 | AAAAGUA  |
| ENSG00000165209 | CCUUCAU  |
| ENSG00000165209 | GAGGUAG  |
| ENSG00000165209 | GAGGU AU |
| ENSG00000165209 | UCACAAG  |
| ENSG00000165209 | UCACAGG  |
| ENSG00000165209 | UCACAGU  |
| ENSG00000165209 | UGCAUUG  |
| ENSG00000165219 | AAAACUG  |
| ENSG00000165219 | AAAGAGG  |
| ENSG00000165219 | AAGGCAC  |

|                 |          |
|-----------------|----------|
| ENSG00000165219 | AAUGCCC  |
| ENSG00000165219 | CUAGUAA  |
| ENSG00000165219 | GGUGGGC  |
| ENSG00000165219 | GUGAAUG  |
| ENSG00000165219 | GUGCUUG  |
| ENSG00000165219 | UGAAGCU  |
| ENSG00000165219 | UGUGCUU  |
| ENSG00000165233 | CUUUGGU  |
| ENSG00000165238 | UACAAAG  |
| ENSG00000165240 | AGCACCA  |
| ENSG00000165240 | CCUUCAU  |
| ENSG00000165240 | CUUUGGU  |
| ENSG00000165240 | GAAACAU  |
| ENSG00000165244 | AAAGUGC  |
| ENSG00000165244 | AAGUGCA  |
| ENSG00000165244 | AGCAGCA  |
| ENSG00000165244 | AGCAGCG  |
| ENSG00000165244 | AGCAGCU  |
| ENSG00000165244 | AGCUUUAU |
| ENSG00000165244 | UACAAAG  |
| ENSG00000165246 | CAUAUUG  |
| ENSG00000165246 | CUCUUCC  |
| ENSG00000165246 | CUUUGGU  |
| ENSG00000165246 | GGCAGGG  |
| ENSG00000165259 | CACACCU  |
| ENSG00000165271 | GAGCUGC  |
| ENSG00000165271 | GAGUCUU  |
| ENSG00000165271 | UCAUACA  |
| ENSG00000165271 | UGAGUCU  |
| ENSG00000165275 | GUGCCAC  |
| ENSG00000165280 | AAGUGCA  |
| ENSG00000165280 | ACAAGGU  |
| ENSG00000165280 | ACUCAAA  |
| ENSG00000165280 | ACUCAGG  |
| ENSG00000165280 | AGGGAGG  |
| ENSG00000165280 | CCCUGUC  |
| ENSG00000165280 | CCCUGUU  |
| ENSG00000165280 | CUCCAUU  |
| ENSG00000165280 | GCAGCAU  |
| ENSG00000165280 | GGUUUAC  |
| ENSG00000165280 | GUCCAGA  |
| ENSG00000165280 | GUGGCCC  |
| ENSG00000165280 | UCCAGAG  |
| ENSG00000165280 | UUGGUUC  |
| ENSG00000165280 | UUUGCAC  |
| ENSG00000165282 | UGGCUGC  |
| ENSG00000165283 | UAUUACC  |
| ENSG00000165288 | AAGGUGC  |
| ENSG00000165288 | CAGUAGA  |
| ENSG00000165300 | AAGGCAC  |
| ENSG00000165300 | AUGGAUU  |
| ENSG00000165300 | CUUCACC  |
| ENSG00000165300 | GCUACAU  |
| ENSG00000165300 | UGCAUUAU |
| ENSG00000165322 | AAAAGUA  |
| ENSG00000165322 | AACAAAC  |
| ENSG00000165322 | CCAGUGC  |
| ENSG00000165322 | CUAUACA  |
| ENSG00000165322 | GACCAUG  |
| ENSG00000165322 | GUAACAG  |
| ENSG00000165322 | GUGCAAA  |
| ENSG00000165322 | UUGGUCC  |
| ENSG00000165323 | AAAGUGC  |
| ENSG00000165323 | AAAGUUU  |

|                 |         |
|-----------------|---------|
| ENSG00000165323 | AGCCAGU |
| ENSG00000165323 | AGUGCUU |
| ENSG00000165323 | AUAAAGU |
| ENSG00000165323 | CAAGAGC |
| ENSG00000165323 | CACUGUU |
| ENSG00000165323 | CAGCUGG |
| ENSG00000165323 | CAGUAGU |
| ENSG00000165323 | CUACAGU |
| ENSG00000165323 | CUGGGGG |
| ENSG00000165323 | GAUCAGA |
| ENSG00000165323 | GCUUCCU |
| ENSG00000165323 | UACAGUU |
| ENSG00000165323 | UAGUGAG |
| ENSG00000165323 | UAUAAAG |
| ENSG00000165323 | UCCCUUU |
| ENSG00000165323 | UGCAAAG |
| ENSG00000165323 | UGCUCAC |
| ENSG00000165323 | UGUGCUU |
| ENSG00000165323 | UUGUGUC |
| ENSG00000165323 | UUUGCAA |
| ENSG00000165325 | AAAAAUC |
| ENSG00000165338 | AAGGCAC |
| ENSG00000165349 | CCAUUAC |
| ENSG00000165355 | AAAACUG |
| ENSG00000165355 | AACCGUU |
| ENSG00000165355 | AAUCUCA |
| ENSG00000165355 | ACACACU |
| ENSG00000165355 | ACAGGUG |
| ENSG00000165355 | AGAUAAA |
| ENSG00000165355 | AGCAGCA |
| ENSG00000165355 | AGCAGCG |
| ENSG00000165355 | AUGUGCC |
| ENSG00000165355 | AUGUGGG |
| ENSG00000165355 | AUUGCAC |
| ENSG00000165355 | CACACCU |
| ENSG00000165355 | CAGGUGA |
| ENSG00000165355 | CAUGGAU |
| ENSG00000165355 | CCAGCAU |
| ENSG00000165355 | CCAGUGC |
| ENSG00000165355 | CCAGUGU |
| ENSG00000165355 | CGUACCG |
| ENSG00000165355 | CUCACAC |
| ENSG00000165355 | CUGGGCA |
| ENSG00000165355 | CUGUUGA |
| ENSG00000165355 | CUUUGGU |
| ENSG00000165355 | GAAACAU |
| ENSG00000165355 | GCCUGU  |
| ENSG00000165355 | GGAUUUC |
| ENSG00000165355 | GGCAGCG |
| ENSG00000165355 | GUGCCAC |
| ENSG00000165355 | UAAUAUC |
| ENSG00000165355 | UAUUGCU |
| ENSG00000165355 | UCACCAC |
| ENSG00000165355 | UCCUGAG |
| ENSG00000165355 | UCUCACC |
| ENSG00000165355 | UGCCAGC |
| ENSG00000165355 | UGCUCAC |
| ENSG00000165355 | UUGGCAA |
| ENSG00000165355 | UUGGCAC |
| ENSG00000165359 | AAUACUG |
| ENSG00000165359 | CAAAGCA |
| ENSG00000165359 | GAGGUAG |
| ENSG00000165376 | AGCAGCA |
| ENSG00000165376 | CAGCAGA |

|                 |         |
|-----------------|---------|
| ENSG00000165376 | CAGCAGG |
| ENSG00000165376 | CCCCCAG |
| ENSG00000165376 | UCUCCAA |
| ENSG00000165376 | UGUGCUU |
| ENSG00000165379 | AAAAAUC |
| ENSG00000165379 | AAAGUGC |
| ENSG00000165383 | UCCAGAG |
| ENSG00000165389 | AAAGAAU |
| ENSG00000165389 | AAAGCUG |
| ENSG00000165389 | AAAGUAC |
| ENSG00000165389 | AAAGUUU |
| ENSG00000165389 | AACAGUC |
| ENSG00000165389 | ACAAUAU |
| ENSG00000165389 | ACAUUAC |
| ENSG00000165389 | ACCCAUU |
| ENSG00000165389 | AGCAAAA |
| ENSG00000165389 | CAAAACU |
| ENSG00000165389 | CAAAUGC |
| ENSG00000165389 | CCAUUAC |
| ENSG00000165389 | CUAUACA |
| ENSG00000165389 | CUUACAG |
| ENSG00000165389 | CUUUGGU |
| ENSG00000165389 | GAAACAU |
| ENSG00000165389 | GCUACAU |
| ENSG00000165389 | GUGCAAA |
| ENSG00000165389 | UAAUGCU |
| ENSG00000165389 | UCCUGAG |
| ENSG00000165389 | UGAAAGG |
| ENSG00000165389 | UGAAAUG |
| ENSG00000165389 | UUGGUCC |
| ENSG00000165406 | AAGGCAC |
| ENSG00000165406 | AAGUGCU |
| ENSG00000165406 | GGCAGUG |
| ENSG00000165406 | GUAAACA |
| ENSG00000165409 | AAUUUUA |
| ENSG00000165409 | CUAGGCU |
| ENSG00000165409 | GAGAUGA |
| ENSG00000165410 | AGGCAGG |
| ENSG00000165410 | AUGGCAC |
| ENSG00000165410 | CGUGGCC |
| ENSG00000165410 | GUGAGGU |
| ENSG00000165410 | UCCAGUU |
| ENSG00000165417 | GUAGUGU |
| ENSG00000165424 | AAAAAUC |
| ENSG00000165424 | AAAGAAU |
| ENSG00000165424 | AACGGAA |
| ENSG00000165424 | AAGUCUU |
| ENSG00000165424 | AAGUGCA |
| ENSG00000165424 | AAGUGCU |
| ENSG00000165424 | AAUUUUA |
| ENSG00000165424 | ACAAUAU |
| ENSG00000165424 | ACACACC |
| ENSG00000165424 | ACACACU |
| ENSG00000165424 | ACUCAAA |
| ENSG00000165424 | AGUAACA |
| ENSG00000165424 | AUAAUAC |
| ENSG00000165424 | CACAGUG |
| ENSG00000165424 | CCAGGAG |
| ENSG00000165424 | CCCCUGG |
| ENSG00000165424 | CCUGCUG |
| ENSG00000165424 | CCUUCUU |
| ENSG00000165424 | GAAAACA |
| ENSG00000165424 | GAUUGUC |
| ENSG00000165424 | GGCUCAG |

|                 |         |
|-----------------|---------|
| ENSG00000165424 | GUAAACA |
| ENSG00000165424 | GUAGUGU |
| ENSG00000165424 | GUGGCC  |
| ENSG00000165424 | UAUAAUA |
| ENSG00000165424 | UCACAAG |
| ENSG00000165424 | UCACAGG |
| ENSG00000165424 | UCACAGU |
| ENSG00000165424 | UCAUUUG |
| ENSG00000165424 | UGCAUAG |
| ENSG00000165424 | UGUGUCA |
| ENSG00000165424 | UUCUUGU |
| ENSG00000165434 | AAGGCAC |
| ENSG00000165434 | AGCAGCA |
| ENSG00000165434 | AGCAGCG |
| ENSG00000165434 | AGCAUUC |
| ENSG00000165434 | CACAGUG |
| ENSG00000165434 | CUCACAC |
| ENSG00000165434 | GAAAACA |
| ENSG00000165434 | GAGCUAA |
| ENSG00000165434 | GAGGUAG |
| ENSG00000165434 | GAGGUAU |
| ENSG00000165434 | GGAUUUU |
| ENSG00000165434 | GUGAGGU |
| ENSG00000165434 | UAUUACC |
| ENSG00000165434 | UCAAGUA |
| ENSG00000165434 | UCACAGG |
| ENSG00000165434 | UCACAGU |
| ENSG00000165434 | UUCAAGC |
| ENSG00000165443 | AAGUGCU |
| ENSG00000165443 | AGUGCUG |
| ENSG00000165443 | UGCUGAC |
| ENSG00000165443 | UUGGCAA |
| ENSG00000165443 | UUGGCAC |
| ENSG00000165449 | AAGUGCU |
| ENSG00000165449 | AGUGCUU |
| ENSG00000165449 | CACAAUG |
| ENSG00000165449 | GAGAAGA |
| ENSG00000165449 | GAGGUAG |
| ENSG00000165449 | UUGGCAA |
| ENSG00000165458 | AAAACUG |
| ENSG00000165458 | CCUUCAU |
| ENSG00000165458 | GGACGGA |
| ENSG00000165458 | UCAUUUG |
| ENSG00000165458 | UUCGCGC |
| ENSG00000165458 | UUUCAAC |
| ENSG00000165462 | GGGGCAG |
| ENSG00000165476 | AAAGUGC |
| ENSG00000165476 | AAGUGUG |
| ENSG00000165476 | ACCUGGA |
| ENSG00000165476 | AGUGUGC |
| ENSG00000165476 | CAAAACU |
| ENSG00000165476 | GAGAUGA |
| ENSG00000165476 | UUUCAAC |
| ENSG00000165478 | GAUUGUA |
| ENSG00000165478 | GAUUGUC |
| ENSG00000165490 | AUAAAGU |
| ENSG00000165490 | CAGGUGA |
| ENSG00000165494 | AAAAGUA |
| ENSG00000165494 | UAUAAUA |
| ENSG00000165495 | AAAAAUC |
| ENSG00000165495 | AACAUUC |
| ENSG00000165495 | ACAUCAC |
| ENSG00000165495 | AGCACCA |
| ENSG00000165495 | AUGGCAC |

|                 |          |
|-----------------|----------|
| ENSG00000165495 | AUUCAUU  |
| ENSG00000165495 | CUCAAAC  |
| ENSG00000165495 | GAAAACA  |
| ENSG00000165495 | GAGAAAU  |
| ENSG00000165495 | GAGACCU  |
| ENSG00000165495 | GGGGGAA  |
| ENSG00000165495 | GUAAACA  |
| ENSG00000165495 | UACAAAG  |
| ENSG00000165495 | UAUAAAG  |
| ENSG00000165495 | UCACAGG  |
| ENSG00000165495 | UCACAGU  |
| ENSG00000165495 | UCAUUUG  |
| ENSG00000165495 | UCUCCAA  |
| ENSG00000165495 | UGAAGCU  |
| ENSG00000165495 | UGCAAAG  |
| ENSG00000165495 | UGCAUAG  |
| ENSG00000165495 | UGCAUAU  |
| ENSG00000165525 | CUUCUCU  |
| ENSG00000165526 | UGAGAAG  |
| ENSG00000165527 | ACAUUAC  |
| ENSG00000165527 | UAUUGCU  |
| ENSG00000165527 | UCACAGU  |
| ENSG00000165548 | AAGGCAC  |
| ENSG00000165548 | CAGCAGG  |
| ENSG00000165548 | CCCCUGG  |
| ENSG00000165548 | CUGGAAA  |
| ENSG00000165548 | GCUUCCU  |
| ENSG00000165548 | GGAGGCA  |
| ENSG00000165555 | UCCUGAG  |
| ENSG00000165556 | ACAUUCA  |
| ENSG00000165556 | GGCAUUG  |
| ENSG00000165556 | GGCUCAG  |
| ENSG00000165556 | GUGACAG  |
| ENSG00000165556 | UCCCUUU  |
| ENSG00000165566 | AAAGUGC  |
| ENSG00000165566 | AGUGCUU  |
| ENSG00000165566 | CCUGAG   |
| ENSG00000165566 | GGCAUUG  |
| ENSG00000165566 | UCCUGU   |
| ENSG00000165566 | UGCAAAG  |
| ENSG00000165572 | CUAUACA  |
| ENSG00000165572 | GCUACAU  |
| ENSG00000165572 | UAAUACA  |
| ENSG00000165572 | UACAAAG  |
| ENSG00000165572 | UUUGCAA  |
| ENSG00000165588 | AAAGUAA  |
| ENSG00000165588 | AAAGUAC  |
| ENSG00000165588 | AAAGUAU  |
| ENSG00000165588 | AAGACAU  |
| ENSG00000165588 | ACAAUUAU |
| ENSG00000165588 | ACACACU  |
| ENSG00000165588 | AGGACAC  |
| ENSG00000165588 | AGUGCAA  |
| ENSG00000165588 | AUAAAGU  |
| ENSG00000165588 | CACAGUG  |
| ENSG00000165588 | CAUAUUG  |
| ENSG00000165588 | GAUUGUA  |
| ENSG00000165588 | UCACAGU  |
| ENSG00000165588 | UGCAUAG  |
| ENSG00000165617 | AAAAACC  |
| ENSG00000165617 | AAAUUUC  |
| ENSG00000165617 | AAGGCAC  |
| ENSG00000165617 | AGCCCUU  |
| ENSG00000165617 | AUAUAAC  |

|                 |         |
|-----------------|---------|
| ENSG00000165617 | AUUGCAC |
| ENSG00000165617 | CUGGACU |
| ENSG00000165617 | UAUUACC |
| ENSG00000165629 | UACAAAG |
| ENSG00000165637 | GCUGGUG |
| ENSG00000165637 | GUGACUG |
| ENSG00000165646 | CUUUGGU |
| ENSG00000165655 | AAUUUUA |
| ENSG00000165655 | CUUGGAG |
| ENSG00000165655 | GAGCUAA |
| ENSG00000165659 | AAUACUG |
| ENSG00000165659 | ACUCCAG |
| ENSG00000165659 | ACUGCAG |
| ENSG00000165659 | ACUGUAG |
| ENSG00000165659 | ACUGUGU |
| ENSG00000165659 | AUAAUAC |
| ENSG00000165659 | AUACAAG |
| ENSG00000165659 | AUUCAUU |
| ENSG00000165659 | CACCAGC |
| ENSG00000165659 | CAGGCUC |
| ENSG00000165659 | CUAGGCU |
| ENSG00000165659 | CUCACAC |
| ENSG00000165659 | GCUGGUG |
| ENSG00000165659 | GGAAGAC |
| ENSG00000165659 | GUGACUG |
| ENSG00000165659 | UCACAUU |
| ENSG00000165659 | UCAUAGA |
| ENSG00000165659 | UCUCACC |
| ENSG00000165659 | UGCAUUA |
| ENSG00000165659 | UGGACUG |
| ENSG00000165659 | UUCCUAG |
| ENSG00000165660 | AAGUGCU |
| ENSG00000165660 | AGUAGAC |
| ENSG00000165660 | CAGGCUC |
| ENSG00000165660 | CUAGUAG |
| ENSG00000165660 | CUUGGAG |
| ENSG00000165660 | GGCUCAG |
| ENSG00000165660 | GUGCUUG |
| ENSG00000165660 | UCACAUU |
| ENSG00000165660 | UCCCUUG |
| ENSG00000165661 | AAAUUUC |
| ENSG00000165661 | CAAUUGC |
| ENSG00000165661 | CCCUGAG |
| ENSG00000165661 | UUCAAAU |
| ENSG00000165669 | AAUUGCU |
| ENSG00000165669 | AAUUUUA |
| ENSG00000165669 | CCAUUAC |
| ENSG00000165669 | UAUAAAG |
| ENSG00000165669 | UUAUGCA |
| ENSG00000165671 | UCACAAG |
| ENSG00000165671 | UCCAGAG |
| ENSG00000165672 | UUGAUCA |
| ENSG00000165675 | ACAUUCA |
| ENSG00000165675 | AGGGAGG |
| ENSG00000165675 | CAGUAGU |
| ENSG00000165675 | GUCAACA |
| ENSG00000165678 | AAAGCUG |
| ENSG00000165685 | GGCAGUG |
| ENSG00000165689 | ACUGCAU |
| ENSG00000165689 | UGCAUUA |
| ENSG00000165699 | AAAAACC |
| ENSG00000165699 | AAAACUG |
| ENSG00000165699 | AAACUGU |
| ENSG00000165699 | AAAUUUC |

|                 |         |
|-----------------|---------|
| ENSG00000165699 | AACAUUC |
| ENSG00000165699 | AAGUCUU |
| ENSG00000165699 | AAGUGCA |
| ENSG00000165699 | ACACACU |
| ENSG00000165699 | ACUAGAU |
| ENSG00000165699 | ACUGGCC |
| ENSG00000165699 | AGCAGCA |
| ENSG00000165699 | AGGUAGU |
| ENSG00000165699 | CACAGUG |
| ENSG00000165699 | CAGCAA  |
| ENSG00000165699 | CAGCUGG |
| ENSG00000165699 | CGUGCAU |
| ENSG00000165699 | CUGGAAA |
| ENSG00000165699 | CUUUGGU |
| ENSG00000165699 | GACCCUG |
| ENSG00000165699 | GAGGUAG |
| ENSG00000165699 | GAUUGUA |
| ENSG00000165699 | UAUAAAG |
| ENSG00000165699 | UCACACA |
| ENSG00000165699 | UCACAGG |
| ENSG00000165699 | UGACAUC |
| ENSG00000165699 | UGGCCCU |
| ENSG00000165699 | UUCCUAG |
| ENSG00000165699 | UUCUAAU |
| ENSG00000165699 | UUGUUCG |
| ENSG00000165704 | GUGCAA  |
| ENSG00000165724 | AAAACUG |
| ENSG00000165724 | AAACUGU |
| ENSG00000165724 | AACACUG |
| ENSG00000165724 | CAGUCUG |
| ENSG00000165724 | UACAAAG |
| ENSG00000165731 | AGUGCUU |
| ENSG00000165731 | CUCCAUI |
| ENSG00000165731 | GGCAGUG |
| ENSG00000165731 | GUGCUUG |
| ENSG00000165731 | UCACAAG |
| ENSG00000165731 | UCACACA |
| ENSG00000165731 | UCACAGU |
| ENSG00000165731 | UGAAAUG |
| ENSG00000165757 | AAAGUGC |
| ENSG00000165757 | ACAUCAC |
| ENSG00000165757 | ACCCUGU |
| ENSG00000165757 | AGUGCAA |
| ENSG00000165757 | CUCAGGG |
| ENSG00000165757 | GCAGGUU |
| ENSG00000165757 | GUGCAA  |
| ENSG00000165757 | UAUAAAG |
| ENSG00000165757 | UCACACA |
| ENSG00000165775 | CUCUICC |
| ENSG00000165775 | GUAUUCU |
| ENSG00000165782 | AAGUGCA |
| ENSG00000165782 | AGCAGCA |
| ENSG00000165782 | AGCAGCG |
| ENSG00000165782 | AGCAGCU |
| ENSG00000165782 | AGUGCAA |
| ENSG00000165782 | GGAAUGU |
| ENSG00000165782 | GUAGUGU |
| ENSG00000165782 | UGAAGUG |
| ENSG00000165782 | UGCCUG  |
| ENSG00000165794 | GAGAAU  |
| ENSG00000165795 | AGUGCAA |
| ENSG00000165802 | AAAGCUG |
| ENSG00000165802 | AUUGCAC |
| ENSG00000165802 | CUGCCCC |



|                 |         |
|-----------------|---------|
| ENSG00000165802 | GCUGGUG |
| ENSG00000165802 | GGCUCUG |
| ENSG00000165804 | ACCAGCA |
| ENSG00000165804 | AUCGUAC |
| ENSG00000165804 | CCUGCUG |
| ENSG00000165804 | GGGCCCC |
| ENSG00000165806 | AAAGUGC |
| ENSG00000165806 | AGCACCA |
| ENSG00000165807 | GGAAUGU |
| ENSG00000165813 | AAAGAAU |
| ENSG00000165813 | ACAGUAC |
| ENSG00000165813 | AGCAAAA |
| ENSG00000165813 | AGCCCUU |
| ENSG00000165813 | UACAGUU |
| ENSG00000165821 | AAAGCUG |
| ENSG00000165821 | GUUAGGA |
| ENSG00000165832 | GUCAUUG |
| ENSG00000165832 | UAUAAUA |
| ENSG00000165832 | UUCAAAU |
| ENSG00000165861 | AACAGUC |
| ENSG00000165861 | AAGACAU |
| ENSG00000165861 | GAAGGAA |
| ENSG00000165861 | GAAUUGU |
| ENSG00000165861 | GAGAACU |
| ENSG00000165861 | GAGGCAG |
| ENSG00000165861 | GGAGGCA |
| ENSG00000165861 | GGAUUUC |
| ENSG00000165861 | GGGUGGU |
| ENSG00000165861 | UCCAGUU |
| ENSG00000165861 | UUCUAAU |
| ENSG00000165868 | AAGUCUU |
| ENSG00000165868 | ACAAUUA |
| ENSG00000165868 | ACCUGGA |
| ENSG00000165868 | AUGCAUU |
| ENSG00000165868 | AUUCAUU |
| ENSG00000165868 | CCAGCAU |
| ENSG00000165868 | CUGCAGC |
| ENSG00000165868 | CUGCAGG |
| ENSG00000165868 | GACCUGG |
| ENSG00000165868 | UCACAUU |
| ENSG00000165868 | UGCAAAG |
| ENSG00000165868 | UUCUGCA |
| ENSG00000165879 | CACAAUG |
| ENSG00000165879 | CUGGGGG |
| ENSG00000165879 | GAUCAGA |
| ENSG00000165879 | UACAAAG |
| ENSG00000165879 | UCACAUU |
| ENSG00000165879 | UCCUAUA |
| ENSG00000165879 | UGGAGAU |
| ENSG00000165879 | UUGGAGG |
| ENSG00000165886 | AGCAGCU |
| ENSG00000165886 | CCCUGAG |
| ENSG00000165886 | GACCCUG |
| ENSG00000165886 | GAGGCAG |
| ENSG00000165886 | GUGUGGC |
| ENSG00000165886 | UGUGUGG |
| ENSG00000165887 | AGCAAAA |
| ENSG00000165891 | ACAUUCA |
| ENSG00000165891 | ACCACAG |
| ENSG00000165891 | ACCCUGU |
| ENSG00000165891 | ACUCAGC |
| ENSG00000165891 | AGCACCA |
| ENSG00000165891 | AGGUAGU |
| ENSG00000165891 | AGUGCAA |

|                 |         |
|-----------------|---------|
| ENSG00000165891 | CACAGUG |
| ENSG00000165891 | UAAUACA |
| ENSG00000165891 | UCACAGG |
| ENSG00000165891 | UUGGUCC |
| ENSG00000165891 | UUUUUGC |
| ENSG00000165914 | GGAAUGU |
| ENSG00000165915 | AUGGCUU |
| ENSG00000165915 | CACAGUG |
| ENSG00000165915 | CCCUGAG |
| ENSG00000165915 | UAUUGCU |
| ENSG00000165915 | UCACAGU |
| ENSG00000165915 | UCCUGAG |
| ENSG00000165917 | AAAGAGG |
| ENSG00000165917 | AAAGUAC |
| ENSG00000165917 | UACAAAG |
| ENSG00000165934 | AGCCCUU |
| ENSG00000165934 | UACAAAG |
| ENSG00000165934 | UGACAUC |
| ENSG00000165949 | CUUCUCU |
| ENSG00000165983 | AAAGGUA |
| ENSG00000165983 | AAGGCAC |
| ENSG00000165983 | GAAACAU |
| ENSG00000165983 | UCAAGUA |
| ENSG00000165985 | AGAUGUG |
| ENSG00000165985 | UGGAUAA |
| ENSG00000165995 | AAACUGU |
| ENSG00000165995 | AAAUUUC |
| ENSG00000165995 | AAGGCAC |
| ENSG00000165995 | CCAGUGU |
| ENSG00000165995 | CUAGUCC |
| ENSG00000165995 | GAUAUGU |
| ENSG00000165995 | GGCAAGA |
| ENSG00000165995 | UCACAGU |
| ENSG00000165995 | UGCUGAC |
| ENSG00000165996 | ACUUGGA |
| ENSG00000165996 | UGGACUG |
| ENSG00000165997 | AUCCCUU |
| ENSG00000165997 | GUGCUUG |
| ENSG00000165997 | UAUAAAG |
| ENSG00000165997 | UCAAGUA |
| ENSG00000165997 | UGUGCUU |
| ENSG00000165997 | UUGUGUC |
| ENSG00000166002 | AAGGCAC |
| ENSG00000166002 | ACAUUCA |
| ENSG00000166002 | UCCCUUU |
| ENSG00000166002 | UGAAAGG |
| ENSG00000166006 | GUGCCUG |
| ENSG00000166016 | AAGGUGC |
| ENSG00000166016 | ACAGUAC |
| ENSG00000166016 | ACAGUAU |
| ENSG00000166016 | AGCAGCA |
| ENSG00000166016 | AGCAGCU |
| ENSG00000166016 | CAGACAG |
| ENSG00000166016 | GACAACU |
| ENSG00000166016 | UCAUACA |
| ENSG00000166016 | UGUCUGG |
| ENSG00000166025 | AGCAGCA |
| ENSG00000166025 | AUGCACC |
| ENSG00000166025 | CAGCAA  |
| ENSG00000166025 | CUUCACC |
| ENSG00000166025 | CUUUGGU |
| ENSG00000166025 | GGCAAGA |
| ENSG00000166025 | GGGGUGC |
| ENSG00000166025 | GGGGUGG |

|                 |          |
|-----------------|----------|
| ENSG00000166025 | UGGCUGC  |
| ENSG00000166033 | UGGCCAC  |
| ENSG00000166037 | AAAGUGC  |
| ENSG00000166037 | CAAAGUG  |
| ENSG00000166037 | CAGCAA   |
| ENSG00000166037 | UACAGUU  |
| ENSG00000166049 | CCCCUGG  |
| ENSG00000166068 | AAAGUUAU |
| ENSG00000166068 | AGUGGUU  |
| ENSG00000166068 | CAAAGUG  |
| ENSG00000166068 | CAGCAA   |
| ENSG00000166068 | UGUGCUU  |
| ENSG00000166068 | UUCAAGC  |
| ENSG00000166068 | UUUCAAC  |
| ENSG00000166086 | GAGGUUAU |
| ENSG00000166086 | GUCAACA  |
| ENSG00000166086 | UCACAUU  |
| ENSG00000166086 | UCCUUGC  |
| ENSG00000166086 | UGGCCAC  |
| ENSG00000166090 | AAAGUGC  |
| ENSG00000166090 | AGUGCCU  |
| ENSG00000166090 | CCUGCUG  |
| ENSG00000166111 | CCCUGUU  |
| ENSG00000166111 | GAGAACC  |
| ENSG00000166111 | GGCAGUG  |
| ENSG00000166111 | UUGGUCC  |
| ENSG00000166123 | AAAUUUC  |
| ENSG00000166123 | AAGUGCA  |
| ENSG00000166123 | GAAACAU  |
| ENSG00000166123 | GUAAACA  |
| ENSG00000166123 | UACAAAG  |
| ENSG00000166123 | UAUAAUA  |
| ENSG00000166123 | UCCCUUG  |
| ENSG00000166128 | AAUACUG  |
| ENSG00000166128 | ACAUUCA  |
| ENSG00000166128 | AUAUAAC  |
| ENSG00000166128 | AUUGCAC  |
| ENSG00000166128 | CCUGAG   |
| ENSG00000166128 | GUCAGUU  |
| ENSG00000166128 | UGCAAAG  |
| ENSG00000166135 | AAAAACC  |
| ENSG00000166135 | AAAUUUC  |
| ENSG00000166135 | AAUCACU  |
| ENSG00000166135 | ACACACU  |
| ENSG00000166135 | ACAGGUG  |
| ENSG00000166135 | AGCCAGU  |
| ENSG00000166135 | AGCUGCC  |
| ENSG00000166135 | AGUGCUU  |
| ENSG00000166135 | AUGGCUU  |
| ENSG00000166135 | CAAGAGC  |
| ENSG00000166135 | CACCAGC  |
| ENSG00000166135 | CAGCAGG  |
| ENSG00000166135 | CAGUCCA  |
| ENSG00000166135 | CAGUGCA  |
| ENSG00000166135 | CCAUUAC  |
| ENSG00000166135 | CCCCCAG  |
| ENSG00000166135 | CCUUCAU  |
| ENSG00000166135 | CUCUUCC  |
| ENSG00000166135 | CUGCUCU  |
| ENSG00000166135 | CUGGGCA  |
| ENSG00000166135 | GACUUCC  |
| ENSG00000166135 | GAGACCU  |
| ENSG00000166135 | GAGGCAG  |
| ENSG00000166135 | GGACGGA  |

|                 |         |
|-----------------|---------|
| ENSG00000166135 | GGCAGGG |
| ENSG00000166135 | GGGGCAG |
| ENSG00000166135 | GUGACAG |
| ENSG00000166135 | GUGCUUG |
| ENSG00000166135 | UCACAGG |
| ENSG00000166135 | UCCAGAG |
| ENSG00000166135 | UGCCCUG |
| ENSG00000166135 | UUAGAGA |
| ENSG00000166135 | UUGGCAA |
| ENSG00000166135 | UUGGCAC |
| ENSG00000166147 | AAGUCUU |
| ENSG00000166147 | ACACACC |
| ENSG00000166147 | ACAGUAC |
| ENSG00000166147 | AGUGAUC |
| ENSG00000166147 | AGUGCUG |
| ENSG00000166147 | AUGUAAU |
| ENSG00000166147 | CCAUUAC |
| ENSG00000166147 | CCUGUAC |
| ENSG00000166147 | GAGAAAU |
| ENSG00000166147 | GAUAUGU |
| ENSG00000166147 | GAUUGUA |
| ENSG00000166147 | GCACCAU |
| ENSG00000166147 | GGUUGAC |
| ENSG00000166147 | GGUUGUC |
| ENSG00000166147 | GUCUCUG |
| ENSG00000166147 | UCACAUU |
| ENSG00000166147 | UUGGUCC |
| ENSG00000166159 | AACAAAC |
| ENSG00000166159 | AAUUUUA |
| ENSG00000166159 | CAGGCUC |
| ENSG00000166159 | CUGCAGG |
| ENSG00000166159 | GAAACAU |
| ENSG00000166159 | GAAGGAA |
| ENSG00000166159 | GAGAAGA |
| ENSG00000166159 | GGAAGAC |
| ENSG00000166159 | GGGUGUU |
| ENSG00000166159 | GGUUACC |
| ENSG00000166159 | UCCCUUU |
| ENSG00000166159 | UGAGAAG |
| ENSG00000166165 | AACUCUA |
| ENSG00000166167 | AACUGGU |
| ENSG00000166167 | AAGACAU |
| ENSG00000166167 | AAUCACU |
| ENSG00000166167 | ACAUCAC |
| ENSG00000166167 | ACCCUGU |
| ENSG00000166167 | ACUGCAG |
| ENSG00000166167 | AGCAGCG |
| ENSG00000166167 | AGUAGAC |
| ENSG00000166167 | AUGGCUU |
| ENSG00000166167 | CCCCCAG |
| ENSG00000166167 | CUACAAA |
| ENSG00000166167 | CUCCCAA |
| ENSG00000166167 | CUCCCAC |
| ENSG00000166167 | CUCUGGG |
| ENSG00000166167 | CUUCUCU |
| ENSG00000166167 | GAGAAAU |
| ENSG00000166167 | GCAGCAU |
| ENSG00000166167 | GGGUUUA |
| ENSG00000166167 | GGUUUAC |
| ENSG00000166167 | GUUAAUG |
| ENSG00000166167 | UAGUGAG |
| ENSG00000166167 | UAUUACC |
| ENSG00000166167 | UCCCACA |
| ENSG00000166167 | UCCCACC |

|                 |         |
|-----------------|---------|
| ENSG00000166167 | UCUAGAG |
| ENSG00000166167 | UCUGGAA |
| ENSG00000166169 | GAGGUAG |
| ENSG00000166170 | AAGUGCA |
| ENSG00000166170 | AGCAGCA |
| ENSG00000166181 | AAAAGUA |
| ENSG00000166181 | AAAGGUA |
| ENSG00000166181 | ACAGGUG |
| ENSG00000166181 | CAGUAGU |
| ENSG00000166181 | CUCCAUU |
| ENSG00000166181 | CUUCUCU |
| ENSG00000166181 | GAGAAGA |
| ENSG00000166181 | GAGUCUU |
| ENSG00000166181 | UAUUGCU |
| ENSG00000166181 | UCAUACA |
| ENSG00000166188 | AGCAAAA |
| ENSG00000166188 | AUAUUAU |
| ENSG00000166188 | UUGGUUC |
| ENSG00000166197 | AAAUUUC |
| ENSG00000166197 | AAUUUUA |
| ENSG00000166197 | UAAUAUC |
| ENSG00000166200 | AAAAAUC |
| ENSG00000166200 | ACAGUAU |
| ENSG00000166200 | ACUGCAG |
| ENSG00000166200 | ACUGUUU |
| ENSG00000166200 | AGCAAAA |
| ENSG00000166200 | AGCAGCA |
| ENSG00000166200 | AGGUUAU |
| ENSG00000166200 | AUUGCAC |
| ENSG00000166200 | CUGCAGC |
| ENSG00000166200 | CUUGGGC |
| ENSG00000166200 | GAGAAAU |
| ENSG00000166200 | GGCAAGA |
| ENSG00000166200 | GUCAGUU |
| ENSG00000166200 | GUGACAG |
| ENSG00000166200 | UAUUGCU |
| ENSG00000166200 | UCAAGUA |
| ENSG00000166200 | UCUGGAA |
| ENSG00000166200 | UGCAAAG |
| ENSG00000166200 | UGGAGAU |
| ENSG00000166200 | UGGGAUC |
| ENSG00000166200 | UUCAAGC |
| ENSG00000166200 | UUCUUGU |
| ENSG00000166200 | UUGGUUC |
| ENSG00000166200 | UUUGCAC |
| ENSG00000166206 | AAAAACC |
| ENSG00000166206 | AAAAAUC |
| ENSG00000166206 | AAGUCUU |
| ENSG00000166206 | AGCAAAA |
| ENSG00000166206 | AUGACAC |
| ENSG00000166206 | AUUCAUU |
| ENSG00000166206 | CAAUUGC |
| ENSG00000166206 | CAUGGGU |
| ENSG00000166206 | CUACAAA |
| ENSG00000166206 | GAGAAAU |
| ENSG00000166206 | GAGGCUG |
| ENSG00000166206 | GUGCUUG |
| ENSG00000166206 | UACAAAG |
| ENSG00000166206 | UCAAGUA |
| ENSG00000166206 | UCACAGU |
| ENSG00000166206 | UCACAUU |
| ENSG00000166206 | UCAUUCG |
| ENSG00000166206 | UCCCUUU |
| ENSG00000166206 | UGAAAGG |

|                 |         |
|-----------------|---------|
| ENSG00000166206 | UUAGGAU |
| ENSG00000166206 | UUAUGCA |
| ENSG00000166206 | UUCAAGC |
| ENSG00000166224 | AAAACUG |
| ENSG00000166224 | AAAAGUA |
| ENSG00000166224 | AAGGCAC |
| ENSG00000166224 | AAGUUGU |
| ENSG00000166224 | ACACACU |
| ENSG00000166224 | ACAGUAC |
| ENSG00000166224 | CCCUGAG |
| ENSG00000166224 | CCUUCAU |
| ENSG00000166224 | CCUUCUG |
| ENSG00000166224 | GCUGUCU |
| ENSG00000166224 | UCCCUUU |
| ENSG00000166224 | UCCUGAG |
| ENSG00000166224 | UCCUUGC |
| ENSG00000166224 | UCUCCAA |
| ENSG00000166224 | UUCAAAU |
| ENSG00000166225 | AAAGUAA |
| ENSG00000166225 | AAGGCAC |
| ENSG00000166225 | AAGGUGC |
| ENSG00000166225 | AAGUGCA |
| ENSG00000166225 | AAGUGCU |
| ENSG00000166225 | AAUGCCC |
| ENSG00000166225 | ACAGUAC |
| ENSG00000166225 | ACCCUGU |
| ENSG00000166225 | ACUGGAU |
| ENSG00000166225 | ACUGUAG |
| ENSG00000166225 | AGCAGCA |
| ENSG00000166225 | AGUGCUG |
| ENSG00000166225 | AUACCUC |
| ENSG00000166225 | AUGUAAU |
| ENSG00000166225 | CACUGUU |
| ENSG00000166225 | CCCUGUU |
| ENSG00000166225 | CUUACAG |
| ENSG00000166225 | GACCUGG |
| ENSG00000166225 | GAGGUAG |
| ENSG00000166225 | GAGGUAU |
| ENSG00000166225 | GCACCAU |
| ENSG00000166225 | GCUGGUG |
| ENSG00000166225 | GUAAACA |
| ENSG00000166225 | GUCUCUG |
| ENSG00000166225 | GUGCAA  |
| ENSG00000166225 | GUGCCAC |
| ENSG00000166225 | UCACAAG |
| ENSG00000166225 | UCCCUUG |
| ENSG00000166225 | UGCAUAG |
| ENSG00000166225 | UGCAUUA |
| ENSG00000166225 | UGCAUUG |
| ENSG00000166225 | UUUUUGC |
| ENSG00000166228 | UUCAAAU |
| ENSG00000166233 | AACAAAC |
| ENSG00000166233 | UAUUACC |
| ENSG00000166233 | UUAUGCA |
| ENSG00000166257 | AAUACUG |
| ENSG00000166257 | AGCACCA |
| ENSG00000166257 | GAAUUGU |
| ENSG00000166257 | GAGAACU |
| ENSG00000166257 | GAGCCCU |
| ENSG00000166257 | GCUGGUG |
| ENSG00000166257 | UCACAGU |
| ENSG00000166257 | UGAGAAG |
| ENSG00000166257 | UGAGAAU |
| ENSG00000166260 | AAAAAUC |

|                 |         |
|-----------------|---------|
| ENSG00000166260 | AAAAGUA |
| ENSG00000166260 | AAAGUUU |
| ENSG00000166260 | AGUGCCU |
| ENSG00000166260 | CAGGAAC |
| ENSG00000166260 | UCACAGG |
| ENSG00000166260 | UCAUUUG |
| ENSG00000166260 | UUUGCAC |
| ENSG00000166261 | AAAGUGC |
| ENSG00000166261 | AAGUGCA |
| ENSG00000166261 | UGUGCUU |
| ENSG00000166263 | AACUACU |
| ENSG00000166263 | AUGGCAC |
| ENSG00000166263 | CAGCAGG |
| ENSG00000166263 | CAGUCUG |
| ENSG00000166263 | CUCAAAC |
| ENSG00000166263 | CUGGGGG |
| ENSG00000166263 | UGAGUCU |
| ENSG00000166263 | UGGAGAU |
| ENSG00000166263 | UGUGCUU |
| ENSG00000166265 | AAAGGUA |
| ENSG00000166265 | AAUUAAU |
| ENSG00000166266 | AAAGAAU |
| ENSG00000166266 | AAGGCAC |
| ENSG00000166266 | ACAGUAC |
| ENSG00000166266 | ACAGUAU |
| ENSG00000166266 | ACAUUCA |
| ENSG00000166266 | ACUCCAG |
| ENSG00000166266 | AGUGUGC |
| ENSG00000166266 | AUACAAG |
| ENSG00000166266 | GCAUCCC |
| ENSG00000166266 | GCUGGUG |
| ENSG00000166266 | GUGCAAA |
| ENSG00000166266 | UCACAAG |
| ENSG00000166266 | UCAUGAU |
| ENSG00000166266 | UCCAGUU |
| ENSG00000166266 | UCCUUGC |
| ENSG00000166266 | UUUGCAC |
| ENSG00000166272 | AAAGUAU |
| ENSG00000166272 | AAUACUG |
| ENSG00000166272 | ACUGUGU |
| ENSG00000166272 | AGUGGUU |
| ENSG00000166272 | CAAAGUG |
| ENSG00000166272 | CACAGGG |
| ENSG00000166272 | CUCUGGG |
| ENSG00000166272 | CUUCUCU |
| ENSG00000166272 | GAAAACA |
| ENSG00000166272 | GGAAUGU |
| ENSG00000166272 | GGAUUUU |
| ENSG00000166272 | GUAAACA |
| ENSG00000166272 | GUCAGUU |
| ENSG00000166272 | GUGCAAA |
| ENSG00000166272 | UCACAAG |
| ENSG00000166272 | UCACAGG |
| ENSG00000166272 | UCACAGU |
| ENSG00000166272 | UGGCUGC |
| ENSG00000166272 | UUGGUUC |
| ENSG00000166275 | CAGCUGG |
| ENSG00000166275 | UACAAAG |
| ENSG00000166275 | UGCAGCU |
| ENSG00000166289 | AAGGCAC |
| ENSG00000166289 | GGAGAGA |
| ENSG00000166292 | AUAUAAC |
| ENSG00000166313 | CAGACAG |
| ENSG00000166317 | CAAAGCA |

|                 |          |
|-----------------|----------|
| ENSG00000166317 | CAGCAAA  |
| ENSG00000166317 | CUUGUGU  |
| ENSG00000166317 | UGAAGCU  |
| ENSG00000166317 | UUGGUCC  |
| ENSG00000166326 | AAAAAUC  |
| ENSG00000166326 | CAAAGCA  |
| ENSG00000166326 | GCUUCCU  |
| ENSG00000166326 | UCUCCAA  |
| ENSG00000166326 | UUGGUUC  |
| ENSG00000166333 | GUGACAG  |
| ENSG00000166333 | UUGUGAC  |
| ENSG00000166340 | AGUGCAA  |
| ENSG00000166340 | CAGCAGG  |
| ENSG00000166340 | GAGGUAG  |
| ENSG00000166341 | CUGGGCA  |
| ENSG00000166342 | UCCAGAG  |
| ENSG00000166348 | ACAGUAU  |
| ENSG00000166348 | GGGUUUA  |
| ENSG00000166348 | GGUUUAC  |
| ENSG00000166348 | GUAUGUU  |
| ENSG00000166349 | AACACUG  |
| ENSG00000166349 | ACCUGGA  |
| ENSG00000166349 | AUGCAUU  |
| ENSG00000166349 | GAGGUAG  |
| ENSG00000166349 | GGCAUUG  |
| ENSG00000166349 | UCCAGUU  |
| ENSG00000166349 | UCCUGU   |
| ENSG00000166349 | UGCCAGC  |
| ENSG00000166387 | ACUGUGU  |
| ENSG00000166387 | CAGGUGA  |
| ENSG00000166387 | GUGAGGU  |
| ENSG00000166387 | UUGGCAA  |
| ENSG00000166398 | ACCUGGA  |
| ENSG00000166398 | AGCACCA  |
| ENSG00000166398 | AUAAAGU  |
| ENSG00000166398 | AUAU AAC |
| ENSG00000166398 | AUAUU AU |
| ENSG00000166398 | AUGGCAC  |
| ENSG00000166398 | CAAAGCA  |
| ENSG00000166398 | CCAGUGU  |
| ENSG00000166398 | GCACCAU  |
| ENSG00000166398 | GGAUUUC  |
| ENSG00000166398 | GGCUCAG  |
| ENSG00000166398 | GUGAGGU  |
| ENSG00000166398 | GUGCAAA  |
| ENSG00000166398 | GUGCCUG  |
| ENSG00000166398 | UAAUACA  |
| ENSG00000166398 | UAUAAAG  |
| ENSG00000166398 | UCAUACA  |
| ENSG00000166398 | UCUCAAG  |
| ENSG00000166398 | UGCAAAG  |
| ENSG00000166398 | UUCAAAU  |
| ENSG00000166398 | UUUCAAC  |
| ENSG00000166401 | GGUGGGC  |
| ENSG00000166402 | AAAACUG  |
| ENSG00000166402 | ACUGGCU  |
| ENSG00000166402 | AGCUGCC  |
| ENSG00000166402 | AUGAGCU  |
| ENSG00000166402 | AUGGCAC  |
| ENSG00000166402 | CAGCAGA  |
| ENSG00000166402 | CUAGGCU  |
| ENSG00000166402 | CUGCAGC  |
| ENSG00000166402 | CUGCAGG  |
| ENSG00000166402 | CUUGGAG  |



|                 |         |
|-----------------|---------|
| ENSG00000166402 | GAAAACA |
| ENSG00000166402 | GAAGGAA |
| ENSG00000166402 | GAGGCUG |
| ENSG00000166402 | GCCCUUA |
| ENSG00000166402 | GGGGCAG |
| ENSG00000166402 | GUCUCUG |
| ENSG00000166402 | UCCCUUU |
| ENSG00000166402 | UUUGCAC |
| ENSG00000166405 | AGCACCA |
| ENSG00000166405 | CACAGGG |
| ENSG00000166405 | CUGCUCA |
| ENSG00000166405 | GUGACAG |
| ENSG00000166407 | AACAUUC |
| ENSG00000166407 | ACAUUCA |
| ENSG00000166407 | GAAACAU |
| ENSG00000166411 | AGCAGCA |
| ENSG00000166411 | UGUGCUU |
| ENSG00000166415 | AGCAAAA |
| ENSG00000166415 | GACAACU |
| ENSG00000166415 | GUCAUUG |
| ENSG00000166428 | GGAGGAG |
| ENSG00000166432 | UAAUAUC |
| ENSG00000166435 | AAGUGCA |
| ENSG00000166435 | AAUCUCA |
| ENSG00000166435 | ACAGUAC |
| ENSG00000166435 | ACAGUAU |
| ENSG00000166435 | CAAAGUG |
| ENSG00000166435 | GCUGUCU |
| ENSG00000166435 | GGACUGC |
| ENSG00000166435 | GUGCCAC |
| ENSG00000166435 | UAUUGCU |
| ENSG00000166435 | UGAGAAU |
| ENSG00000166439 | AAUACUG |
| ENSG00000166439 | AAUCACU |
| ENSG00000166439 | ACUGUAG |
| ENSG00000166439 | AGCACCA |
| ENSG00000166439 | AGUGGUU |
| ENSG00000166439 | AUGAGCU |
| ENSG00000166439 | CACCACC |
| ENSG00000166439 | CUUUGGU |
| ENSG00000166439 | GACUUCC |
| ENSG00000166439 | GAGCCCC |
| ENSG00000166439 | GAGCCCU |
| ENSG00000166439 | GCAGAAG |
| ENSG00000166439 | GCAUCC  |
| ENSG00000166439 | GGCAGUG |
| ENSG00000166439 | GUAAACA |
| ENSG00000166439 | UCAUGAU |
| ENSG00000166439 | UCCAGAG |
| ENSG00000166439 | UCCAGUU |
| ENSG00000166439 | UGUCUUU |
| ENSG00000166439 | UUCAAAU |
| ENSG00000166439 | UUCCAUA |
| ENSG00000166444 | AGUGGUU |
| ENSG00000166444 | CUUACAG |
| ENSG00000166446 | AACAAAC |
| ENSG00000166446 | UCACACA |
| ENSG00000166446 | UCUCCAA |
| ENSG00000166448 | AUGAGCU |
| ENSG00000166448 | GGGUGG  |
| ENSG00000166450 | CAGCAAA |
| ENSG00000166450 | GAGGUAU |
| ENSG00000166450 | UCACAUU |
| ENSG00000166452 | AAUCUCU |

|                 |         |
|-----------------|---------|
| ENSG00000166452 | GUCAACA |
| ENSG00000166454 | ACAUUCA |
| ENSG00000166454 | AUGCAUU |
| ENSG00000166454 | CUUCUCU |
| ENSG00000166471 | GAGAUGA |
| ENSG00000166471 | UCCUGAG |
| ENSG00000166478 | AUGGCUU |
| ENSG00000166483 | AAAGUGC |
| ENSG00000166483 | AAGUGCU |
| ENSG00000166483 | AGCAGCG |
| ENSG00000166483 | CAAAGUG |
| ENSG00000166483 | CUACAAA |
| ENSG00000166483 | GAUUGUA |
| ENSG00000166483 | GAUUGUC |
| ENSG00000166483 | GCUACAU |
| ENSG00000166483 | UACAAAG |
| ENSG00000166484 | AAGGCAC |
| ENSG00000166484 | GGCUCAG |
| ENSG00000166507 | AGGGAGG |
| ENSG00000166507 | GAGGUAG |
| ENSG00000166507 | GAGGUAU |
| ENSG00000166508 | AAGUGCA |
| ENSG00000166509 | AGCACCA |
| ENSG00000166509 | GCAGAAG |
| ENSG00000166523 | AAUUGCU |
| ENSG00000166526 | GUGCAA  |
| ENSG00000166562 | AUAUUAU |
| ENSG00000166569 | UUGGUUC |
| ENSG00000166575 | CCAGUGC |
| ENSG00000166575 | CCAGUGU |
| ENSG00000166575 | CCUGAG  |
| ENSG00000166575 | CUACAGU |
| ENSG00000166575 | CUGGCUC |
| ENSG00000166575 | GGAAUGU |
| ENSG00000166575 | UCCAGUU |
| ENSG00000166575 | UCCUGU  |
| ENSG00000166579 | AAAGUGC |
| ENSG00000166579 | AAGUGCA |
| ENSG00000166579 | AGCUGCC |
| ENSG00000166579 | AGGACAC |
| ENSG00000166579 | AGUGCAA |
| ENSG00000166579 | AUACAAG |
| ENSG00000166579 | AUGAUGA |
| ENSG00000166579 | CUACAAA |
| ENSG00000166579 | GAGAAGA |
| ENSG00000166579 | UAAUACA |
| ENSG00000166592 | AAAAAUC |
| ENSG00000166595 | UACAAAG |
| ENSG00000166598 | AAAAACC |
| ENSG00000166619 | AAAGCUG |
| ENSG00000166619 | AAAGUUU |
| ENSG00000166619 | AAGUCUU |
| ENSG00000166619 | AAUACUG |
| ENSG00000166619 | AAUCUCU |
| ENSG00000166619 | ACAUCAC |
| ENSG00000166619 | AGUGCAA |
| ENSG00000166619 | AUAAAGU |
| ENSG00000166619 | CACAGGG |
| ENSG00000166619 | CAGGAAC |
| ENSG00000166619 | CCAGUGU |
| ENSG00000166619 | GCUGGUG |
| ENSG00000166619 | GGAAUGU |
| ENSG00000166619 | GGAGUCC |
| ENSG00000166619 | GUGACAG |

|                 |         |
|-----------------|---------|
| ENSG00000166619 | UCACAGG |
| ENSG00000166619 | UGACCUA |
| ENSG00000166669 | AAAGCUG |
| ENSG00000166669 | GGCUGCG |
| ENSG00000166669 | UGGCUGC |
| ENSG00000166689 | GUAAACA |
| ENSG00000166689 | GUGCAAA |
| ENSG00000166716 | AACACUG |
| ENSG00000166716 | AAUUGCU |
| ENSG00000166716 | ACUGUUU |
| ENSG00000166716 | AUACAAG |
| ENSG00000166716 | AUGGCAC |
| ENSG00000166716 | CAAGAGC |
| ENSG00000166716 | CAGCAGA |
| ENSG00000166716 | CAGGCUC |
| ENSG00000166716 | CUCCAC  |
| ENSG00000166716 | GGCAUUG |
| ENSG00000166716 | GGGGUGC |
| ENSG00000166716 | GGGGUGG |
| ENSG00000166716 | UGAAAUG |
| ENSG00000166716 | UCCUAG  |
| ENSG00000166734 | AGCCCUU |
| ENSG00000166734 | CCUUCUG |
| ENSG00000166734 | UGCAAAG |
| ENSG00000166747 | AAGGCAC |
| ENSG00000166747 | CAGGCUC |
| ENSG00000166747 | CCUUCAU |
| ENSG00000166747 | GGGGGAA |
| ENSG00000166747 | UUUCAAC |
| ENSG00000166780 | ACACACC |
| ENSG00000166780 | ACACACU |
| ENSG00000166780 | GCUACAU |
| ENSG00000166780 | UCUUGAG |
| ENSG00000166780 | UGAAAUG |
| ENSG00000166783 | AAGUCAC |
| ENSG00000166783 | GGAAGAC |
| ENSG00000166783 | UGCAUAU |
| ENSG00000166783 | UUAUGCA |
| ENSG00000166793 | AAAAAUC |
| ENSG00000166793 | AAAGUGC |
| ENSG00000166793 | AAAGUUU |
| ENSG00000166793 | AGUGCCU |
| ENSG00000166793 | GCGGAGG |
| ENSG00000166793 | GCUGGUG |
| ENSG00000166793 | GGGGUGG |
| ENSG00000166793 | UGAAAUG |
| ENSG00000166794 | GGAAUGU |
| ENSG00000166803 | CUUACAG |
| ENSG00000166803 | GCACCAU |
| ENSG00000166803 | UAAUACA |
| ENSG00000166803 | UACAAAG |
| ENSG00000166803 | UCAACAG |
| ENSG00000166813 | CAGCAGG |
| ENSG00000166823 | UCACAAG |
| ENSG00000166825 | CCCUGAG |
| ENSG00000166825 | UCCCUGU |
| ENSG00000166828 | GACCAUG |
| ENSG00000166828 | UCACAAG |
| ENSG00000166831 | AACAAAC |
| ENSG00000166831 | AAUCCUU |
| ENSG00000166831 | AUGAUGA |
| ENSG00000166831 | AUUGCAC |
| ENSG00000166831 | CAGCAAA |
| ENSG00000166831 | GAAAACA |

|                 |         |
|-----------------|---------|
| ENSG00000166831 | UCACAGG |
| ENSG00000166831 | UCACAGU |
| ENSG00000166831 | UGCAUUG |
| ENSG00000166831 | UUUGCAA |
| ENSG00000166831 | UUUGCAC |
| ENSG00000166833 | AAAGUGC |
| ENSG00000166833 | AAGGCAC |
| ENSG00000166833 | AAGUGCA |
| ENSG00000166833 | AAUGUUG |
| ENSG00000166833 | AAUUUUA |
| ENSG00000166833 | ACUAGAU |
| ENSG00000166833 | AGCCCUU |
| ENSG00000166833 | AGUGCAA |
| ENSG00000166833 | CACAGUG |
| ENSG00000166833 | CAGCAA  |
| ENSG00000166833 | CCCUGUU |
| ENSG00000166833 | CUGGAAA |
| ENSG00000166833 | CUGGCUC |
| ENSG00000166833 | GCACCAU |
| ENSG00000166833 | GCAGCAU |
| ENSG00000166833 | GCCUGU  |
| ENSG00000166833 | GCUUCCU |
| ENSG00000166833 | GGAAGCC |
| ENSG00000166833 | GGCAGUG |
| ENSG00000166833 | GGCUCAG |
| ENSG00000166833 | GUCUACU |
| ENSG00000166833 | UAAGACG |
| ENSG00000166833 | UCACAGG |
| ENSG00000166833 | UCACAGU |
| ENSG00000166833 | UCCUGU  |
| ENSG00000166833 | UUGGUUC |
| ENSG00000166845 | AGUAACA |
| ENSG00000166845 | UUCCUCG |
| ENSG00000166847 | AAAGUAA |
| ENSG00000166847 | AGCAGCA |
| ENSG00000166847 | CUGCAGG |
| ENSG00000166847 | GUCAACA |
| ENSG00000166847 | GUGACAG |
| ENSG00000166847 | UUCCUAG |
| ENSG00000166848 | UACAAAG |
| ENSG00000166860 | AAGGCAC |
| ENSG00000166860 | ACACACC |
| ENSG00000166860 | AGCAGCG |
| ENSG00000166860 | AGCAGCU |
| ENSG00000166860 | AGGUAGU |
| ENSG00000166860 | CAAAGUG |
| ENSG00000166860 | CACAGUG |
| ENSG00000166860 | CCAGCAU |
| ENSG00000166860 | CUCCAGC |
| ENSG00000166860 | CUUUGGU |
| ENSG00000166860 | GAGGUAG |
| ENSG00000166860 | GAGGUAU |
| ENSG00000166860 | GCAGCAU |
| ENSG00000166860 | GCAGGAC |
| ENSG00000166860 | GGUUUAC |
| ENSG00000166860 | GUGAGGU |
| ENSG00000166860 | UACAAAG |
| ENSG00000166860 | UCACAGG |
| ENSG00000166860 | UCACAGU |
| ENSG00000166860 | UCCUGAG |
| ENSG00000166860 | UUGGUUC |
| ENSG00000166863 | AAAAAUC |
| ENSG00000166863 | UGUUGAA |
| ENSG00000166881 | AAAUGGU |

|                 |         |
|-----------------|---------|
| ENSG00000166881 | AACAUUC |
| ENSG00000166881 | AUCCCUU |
| ENSG00000166881 | AUUGCAC |
| ENSG00000166881 | CAGCAA  |
| ENSG00000166881 | CCUGAG  |
| ENSG00000166881 | CUGGCUC |
| ENSG00000166881 | GAGGUAG |
| ENSG00000166881 | GGCUCAG |
| ENSG00000166881 | UCAAGUA |
| ENSG00000166881 | UCCUCG  |
| ENSG00000166886 | AAAUUC  |
| ENSG00000166886 | ACUGCAG |
| ENSG00000166886 | ACUGUAG |
| ENSG00000166886 | CCAGUGU |
| ENSG00000166886 | CUGCAGC |
| ENSG00000166887 | AAAGCUG |
| ENSG00000166887 | GGCAAGA |
| ENSG00000166887 | GUCAGUU |
| ENSG00000166888 | ACAGUAC |
| ENSG00000166888 | ACAGUAU |
| ENSG00000166888 | CAGCUGG |
| ENSG00000166888 | CAGUAGA |
| ENSG00000166888 | GGCCUG  |
| ENSG00000166888 | UCACACA |
| ENSG00000166888 | UUAGGAU |
| ENSG00000166889 | AAAAAUC |
| ENSG00000166889 | ACCAGCA |
| ENSG00000166889 | AGUGUGC |
| ENSG00000166889 | AUACAAG |
| ENSG00000166889 | AUGGCUU |
| ENSG00000166889 | CAGGAAC |
| ENSG00000166889 | CAGUGCA |
| ENSG00000166889 | CUCCAUI |
| ENSG00000166889 | GGAAGAC |
| ENSG00000166889 | GGCAGCG |
| ENSG00000166889 | UCCACA  |
| ENSG00000166889 | UGGAGAU |
| ENSG00000166889 | UGUAUGU |
| ENSG00000166897 | AACAGUC |
| ENSG00000166897 | ACAGUAC |
| ENSG00000166897 | ACAGUAU |
| ENSG00000166897 | AUAUAA  |
| ENSG00000166897 | AUUGCAC |
| ENSG00000166897 | CAAGAGC |
| ENSG00000166897 | CACAGGG |
| ENSG00000166897 | CACAGUG |
| ENSG00000166897 | CACUGUU |
| ENSG00000166897 | CAGGUGA |
| ENSG00000166897 | CUCCAUI |
| ENSG00000166897 | CUCUGGG |
| ENSG00000166897 | CUGGACU |
| ENSG00000166897 | CUGGCA  |
| ENSG00000166897 | GAAAACA |
| ENSG00000166897 | GAGCCCC |
| ENSG00000166897 | GAGCCCU |
| ENSG00000166897 | GAGCUGC |
| ENSG00000166897 | GAGUUGA |
| ENSG00000166897 | GCAGGUU |
| ENSG00000166897 | GCGGGUG |
| ENSG00000166897 | GGAAGAC |
| ENSG00000166897 | GGGCAG  |
| ENSG00000166897 | GGUGGUC |
| ENSG00000166897 | GGUGGUU |
| ENSG00000166897 | GUAACA  |

|                 |         |
|-----------------|---------|
| ENSG00000166897 | UAUUGCU |
| ENSG00000166897 | UCGUGCA |
| ENSG00000166897 | UGAGGAC |
| ENSG00000166897 | UGCAAAG |
| ENSG00000166897 | UGCUCAC |
| ENSG00000166897 | UGUGCGU |
| ENSG00000166897 | UGUGCUU |
| ENSG00000166900 | ACUCAGG |
| ENSG00000166900 | CAGGAAC |
| ENSG00000166900 | CUCAGGG |
| ENSG00000166900 | GAGAACU |
| ENSG00000166900 | GAGGUAU |
| ENSG00000166900 | GGCAAGA |
| ENSG00000166900 | UCCUGAG |
| ENSG00000166908 | AAGGCAC |
| ENSG00000166908 | AAGUGCA |
| ENSG00000166908 | AUGGCUU |
| ENSG00000166908 | AUUGCAC |
| ENSG00000166908 | CAGUCCA |
| ENSG00000166908 | CCCACCU |
| ENSG00000166908 | CUGACUC |
| ENSG00000166908 | CUGGGGG |
| ENSG00000166908 | GCUGGUG |
| ENSG00000166908 | UAUUGCU |
| ENSG00000166908 | UGCAUUG |
| ENSG00000166912 | AAGGCAC |
| ENSG00000166912 | UGCAUUA |
| ENSG00000166912 | UUGGUUC |
| ENSG00000166913 | AAAGAGC |
| ENSG00000166913 | AAUACUG |
| ENSG00000166913 | ACAUUCA |
| ENSG00000166913 | CAGACAG |
| ENSG00000166913 | UCCUGAG |
| ENSG00000166920 | AAAAAUC |
| ENSG00000166920 | ACUAGAU |
| ENSG00000166923 | AAGUCAC |
| ENSG00000166923 | ACAUUAC |
| ENSG00000166923 | CAGUAGU |
| ENSG00000166923 | GUCAUUG |
| ENSG00000166923 | UCACAGU |
| ENSG00000166923 | UCACAUU |
| ENSG00000166924 | AAAGAGC |
| ENSG00000166924 | ACCCUGU |
| ENSG00000166924 | GGCAGGG |
| ENSG00000166924 | UAAUAUC |
| ENSG00000166924 | UCCUGAG |
| ENSG00000166924 | UGACAUC |
| ENSG00000166925 | AAGGCAC |
| ENSG00000166928 | CUCCAGC |
| ENSG00000166949 | AAUCACU |
| ENSG00000166949 | AAUCUCU |
| ENSG00000166949 | CAGCAAA |
| ENSG00000166949 | CAGCAGA |
| ENSG00000166949 | CUAGGCU |
| ENSG00000166949 | CUAUACA |
| ENSG00000166949 | GAGAUGA |
| ENSG00000166949 | GCUUCCU |
| ENSG00000166949 | GUCUGCC |
| ENSG00000166949 | UCAUUUG |
| ENSG00000166949 | UGAAAUG |
| ENSG00000166949 | UGCCAGC |
| ENSG00000166949 | UCCAUA  |
| ENSG00000166960 | AAAUUUC |
| ENSG00000166960 | AAGUCAC |

|                 |         |
|-----------------|---------|
| ENSG00000166960 | AAGUGUG |
| ENSG00000166960 | ACAGGUG |
| ENSG00000166960 | ACUGUGU |
| ENSG00000166960 | AGCAGCA |
| ENSG00000166960 | CAGGUGA |
| ENSG00000166960 | CUGGGGG |
| ENSG00000166960 | GAAAACA |
| ENSG00000166960 | GAGGCAG |
| ENSG00000166960 | GCAGCAU |
| ENSG00000166960 | GGAUUUC |
| ENSG00000166960 | GGAUUUU |
| ENSG00000166960 | GGUUGUC |
| ENSG00000166960 | GUAAACA |
| ENSG00000166960 | GUCAACA |
| ENSG00000166960 | GUGAAUG |
| ENSG00000166960 | GUGACUG |
| ENSG00000166960 | UCCUGAG |
| ENSG00000166960 | UGAAAUG |
| ENSG00000166961 | GAGAAAU |
| ENSG00000166961 | UCUGGAA |
| ENSG00000166961 | UCUGGAG |
| ENSG00000166963 | AAUGUUG |
| ENSG00000166963 | ACAUUCA |
| ENSG00000166963 | ACCCAUU |
| ENSG00000166963 | AGCAGCA |
| ENSG00000166963 | AGCAGCU |
| ENSG00000166963 | CAGCUGG |
| ENSG00000166963 | CUGCAGG |
| ENSG00000166963 | CUGCCC  |
| ENSG00000166963 | CUGCUCA |
| ENSG00000166963 | CUUUGGU |
| ENSG00000166963 | GGAAUGU |
| ENSG00000166963 | GGCAGUG |
| ENSG00000166963 | GUGGGGA |
| ENSG00000166963 | UCAAGUA |
| ENSG00000166963 | UCACACA |
| ENSG00000166974 | AACACUG |
| ENSG00000166974 | AGCACCA |
| ENSG00000166974 | CAAAGCA |
| ENSG00000166974 | CCCUGAG |
| ENSG00000166974 | CUCCAGC |
| ENSG00000166974 | GACCCUG |
| ENSG00000166974 | UCUCAAG |
| ENSG00000166974 | UCUCAA  |
| ENSG00000166974 | UGACAUC |
| ENSG00000166974 | UUGGCAA |
| ENSG00000166987 | AAAACUG |
| ENSG00000166987 | AAACUGU |
| ENSG00000166987 | AACCUGG |
| ENSG00000166987 | AAUCCUU |
| ENSG00000166987 | ACAGGUG |
| ENSG00000166987 | ACUCAGC |
| ENSG00000166987 | AGGCAGG |
| ENSG00000166987 | AGGGAGG |
| ENSG00000166987 | AGGGUCU |
| ENSG00000166987 | AGUGCCG |
| ENSG00000166987 | AGUGCCU |
| ENSG00000166987 | AGUGUGC |
| ENSG00000166987 | AUGAUGC |
| ENSG00000166987 | AUGGCUU |
| ENSG00000166987 | CACAGGG |
| ENSG00000166987 | CAGCUGG |
| ENSG00000166987 | CCCCCAG |
| ENSG00000166987 | CCCCUGG |

|                 |         |
|-----------------|---------|
| ENSG00000166987 | CCGGUUC |
| ENSG00000166987 | CUCCAC  |
| ENSG00000166987 | GACCUGG |
| ENSG00000166987 | GAGGCAG |
| ENSG00000166987 | GAGGCUG |
| ENSG00000166987 | GGAGGAG |
| ENSG00000166987 | GGCAGGG |
| ENSG00000166987 | GGCAGUG |
| ENSG00000166987 | GGGGCAG |
| ENSG00000166987 | GGGUCUU |
| ENSG00000166987 | GGGUGUU |
| ENSG00000166987 | GUAAACA |
| ENSG00000166987 | GUAGUGU |
| ENSG00000166987 | GUCUCUG |
| ENSG00000166987 | GUGCUUG |
| ENSG00000166987 | GUGGGGA |
| ENSG00000166987 | UACAAAG |
| ENSG00000166987 | UCACAGG |
| ENSG00000166987 | UCAUUUG |
| ENSG00000166987 | UGAAAUG |
| ENSG00000166987 | UGUGCUU |
| ENSG00000166987 | UUCAAAU |
| ENSG00000166997 | AAAGUUU |
| ENSG00000167004 | AACUGGU |
| ENSG00000167004 | CAAAGUG |
| ENSG00000167004 | CAGUGCA |
| ENSG00000167004 | UGCAGCU |
| ENSG00000167005 | AAAAGUA |
| ENSG00000167005 | AAAGUAA |
| ENSG00000167005 | AAAGUAU |
| ENSG00000167005 | CAUAUUG |
| ENSG00000167005 | CCUUCUU |
| ENSG00000167005 | CUUUGGU |
| ENSG00000167005 | UGCUCAC |
| ENSG00000167034 | AGAUAAA |
| ENSG00000167034 | CUGGAAA |
| ENSG00000167034 | UGUCUUU |
| ENSG00000167037 | AGGACAC |
| ENSG00000167037 | CUUGGGC |
| ENSG00000167037 | GAUAUGU |
| ENSG00000167037 | UCCUGAG |
| ENSG00000167037 | UGUGCUU |
| ENSG00000167037 | UUGGUCC |
| ENSG00000167074 | AAGUCUU |
| ENSG00000167074 | ACCAGCA |
| ENSG00000167074 | ACCUGGA |
| ENSG00000167074 | AGCCAGU |
| ENSG00000167074 | AGGACAC |
| ENSG00000167074 | CACCAGC |
| ENSG00000167074 | CCCUGAG |
| ENSG00000167074 | GAGAAGA |
| ENSG00000167074 | GCAGGAC |
| ENSG00000167074 | GCUGGAU |
| ENSG00000167074 | UAUUGCU |
| ENSG00000167074 | UCAUGAU |
| ENSG00000167074 | UCUCAAG |
| ENSG00000167074 | UGAAGCU |
| ENSG00000167074 | UGAGAAG |
| ENSG00000167081 | AAUACUG |
| ENSG00000167081 | ACAAUAU |
| ENSG00000167081 | AGCAAAA |
| ENSG00000167081 | AGGUAGU |
| ENSG00000167081 | AGUACUG |
| ENSG00000167081 | AUAAAGU |



|                 |          |
|-----------------|----------|
| ENSG00000167081 | AUAU AAC |
| ENSG00000167081 | AUUCAUU  |
| ENSG00000167081 | CACAGGG  |
| ENSG00000167081 | GAGGU AU |
| ENSG00000167081 | GAGUAUU  |
| ENSG00000167081 | GAUUGGU  |
| ENSG00000167081 | GGAAGAC  |
| ENSG00000167081 | UACAGUU  |
| ENSG00000167081 | UGUAUAA  |
| ENSG00000167085 | ACACACC  |
| ENSG00000167085 | CACACCU  |
| ENSG00000167085 | CCCACCU  |
| ENSG00000167085 | GGGUGUU  |
| ENSG00000167085 | UCACAGG  |
| ENSG00000167085 | UGAAGUG  |
| ENSG00000167085 | UUAGAGA  |
| ENSG00000167088 | AAAAACC  |
| ENSG00000167088 | AACCUGU  |
| ENSG00000167088 | UCUUGAG  |
| ENSG00000167094 | AAUUUUA  |
| ENSG00000167105 | GGCUCAG  |
| ENSG00000167105 | UGAUCCA  |
| ENSG00000167106 | AAGUGCA  |
| ENSG00000167106 | ACAUUCA  |
| ENSG00000167106 | AGCCUGC  |
| ENSG00000167106 | AGUGGUU  |
| ENSG00000167106 | AUACAAG  |
| ENSG00000167106 | AUUCAUU  |
| ENSG00000167106 | CAAAGUG  |
| ENSG00000167106 | CACAGUG  |
| ENSG00000167106 | CACCAGC  |
| ENSG00000167106 | CCCCCAG  |
| ENSG00000167106 | CCUGCUG  |
| ENSG00000167106 | GGAAUGU  |
| ENSG00000167106 | GGAGGCA  |
| ENSG00000167106 | GGGUUUA  |
| ENSG00000167106 | GUCAGUU  |
| ENSG00000167106 | GUGCAAA  |
| ENSG00000167106 | UCACAGG  |
| ENSG00000167106 | UCACAGU  |
| ENSG00000167106 | UCAUUUG  |
| ENSG00000167106 | UGCAAAG  |
| ENSG00000167106 | UGCAU AU |
| ENSG00000167107 | UUAUGCA  |
| ENSG00000167110 | AUACAAG  |
| ENSG00000167112 | AGCUGCC  |
| ENSG00000167113 | AAAGGUA  |
| ENSG00000167114 | AAGACAU  |
| ENSG00000167114 | CUUUGGU  |
| ENSG00000167114 | UUGGUCC  |
| ENSG00000167118 | AGCACCA  |
| ENSG00000167118 | AGCAGCU  |
| ENSG00000167118 | CAGCUGG  |
| ENSG00000167118 | GCCUGGA  |
| ENSG00000167118 | UCCCUGU  |
| ENSG00000167118 | UGGGGGA  |
| ENSG00000167123 | AGUGGUU  |
| ENSG00000167123 | GAGGUAG  |
| ENSG00000167130 | AACACUG  |
| ENSG00000167130 | AGCACCA  |
| ENSG00000167130 | AGCAGCA  |
| ENSG00000167130 | AGCCCUU  |
| ENSG00000167130 | AUGGCUU  |
| ENSG00000167130 | CAGCAGA  |

|                 |          |
|-----------------|----------|
| ENSG00000167130 | CAGGCUC  |
| ENSG00000167130 | CUCUGGG  |
| ENSG00000167130 | CUUUGGU  |
| ENSG00000167130 | GGCAGGG  |
| ENSG00000167130 | GUCUCUG  |
| ENSG00000167130 | GUGCUUG  |
| ENSG00000167130 | UCUGGAA  |
| ENSG00000167165 | CUCAAAC  |
| ENSG00000167165 | UCCCACC  |
| ENSG00000167173 | GAGGUAG  |
| ENSG00000167173 | GAGGUAU  |
| ENSG00000167173 | GUGAGGU  |
| ENSG00000167178 | AGCACCA  |
| ENSG00000167178 | GUGCUUG  |
| ENSG00000167178 | UGUGCUU  |
| ENSG00000167178 | UUGGUUC  |
| ENSG00000167182 | AAAUUUC  |
| ENSG00000167182 | AACAAAC  |
| ENSG00000167182 | AAGGCAC  |
| ENSG00000167182 | AUAAAGU  |
| ENSG00000167182 | CACAGUG  |
| ENSG00000167182 | CAGUUAC  |
| ENSG00000167182 | GGAAUGU  |
| ENSG00000167182 | GGAUUUC  |
| ENSG00000167186 | AACACUG  |
| ENSG00000167191 | AAAUCCC  |
| ENSG00000167191 | CAGUGCA  |
| ENSG00000167191 | CUCUGGG  |
| ENSG00000167191 | CUGGAAA  |
| ENSG00000167191 | GGAUUUC  |
| ENSG00000167191 | GGCAGGG  |
| ENSG00000167191 | GUGUGGC  |
| ENSG00000167191 | UCUGGAA  |
| ENSG00000167191 | UGUGUGG  |
| ENSG00000167191 | UUGGCAC  |
| ENSG00000167193 | AAAGCUG  |
| ENSG00000167193 | AACAGUC  |
| ENSG00000167193 | AAGUGCU  |
| ENSG00000167193 | ACCCUGU  |
| ENSG00000167193 | AGUAGUU  |
| ENSG00000167193 | CAA AUGC |
| ENSG00000167193 | CGUACCG  |
| ENSG00000167193 | CUAGUAA  |
| ENSG00000167193 | GAUUGGU  |
| ENSG00000167193 | GUAGUGU  |
| ENSG00000167193 | UGAAAUG  |
| ENSG00000167193 | UGGCCCU  |
| ENSG00000167193 | UUGACAC  |
| ENSG00000167193 | UUGGUCC  |
| ENSG00000167196 | AGCAGCU  |
| ENSG00000167202 | AAAAAUC  |
| ENSG00000167202 | AAAAGUA  |
| ENSG00000167202 | AAAGUAU  |
| ENSG00000167202 | ACAUUCA  |
| ENSG00000167202 | ACUGUAG  |
| ENSG00000167202 | CAGCAGA  |
| ENSG00000167202 | CUUUGGU  |
| ENSG00000167202 | GUAGUGU  |
| ENSG00000167207 | CUGGAAA  |
| ENSG00000167207 | UCACAGG  |
| ENSG00000167208 | CUCCAGC  |
| ENSG00000167230 | AGUGCUU  |
| ENSG00000167244 | AACACUG  |
| ENSG00000167244 | CUGCCCC  |

|                 |          |
|-----------------|----------|
| ENSG00000167244 | GACUUC   |
| ENSG00000167244 | UCCACA   |
| ENSG00000167244 | UUCUGCA  |
| ENSG00000167257 | AAAAAUC  |
| ENSG00000167257 | ACACACC  |
| ENSG00000167257 | ACACACU  |
| ENSG00000167257 | ACAUUAC  |
| ENSG00000167257 | AGCACCA  |
| ENSG00000167257 | AUAAUAC  |
| ENSG00000167257 | AUAU AAC |
| ENSG00000167257 | UAUAAUA  |
| ENSG00000167258 | AGCAGCA  |
| ENSG00000167264 | UAUUGCU  |
| ENSG00000167264 | UGUCUUU  |
| ENSG00000167306 | AAAAGUA  |
| ENSG00000167306 | AAAGUGC  |
| ENSG00000167306 | AAGGCAC  |
| ENSG00000167306 | AAGUGCA  |
| ENSG00000167306 | GAGGUAG  |
| ENSG00000167306 | UCAAGUA  |
| ENSG00000167306 | UCCACA   |
| ENSG00000167306 | UCCACC   |
| ENSG00000167306 | UUCAAGC  |
| ENSG00000167323 | AAGACAU  |
| ENSG00000167323 | AGGCAGG  |
| ENSG00000167323 | CAAAACU  |
| ENSG00000167323 | GGUGGUU  |
| ENSG00000167323 | UCCUGAG  |
| ENSG00000167323 | UGGACUG  |
| ENSG00000167325 | CAGCAA   |
| ENSG00000167325 | CCAGCAU  |
| ENSG00000167332 | GAAAACA  |
| ENSG00000167332 | UUGGCAC  |
| ENSG00000167371 | AACAGUC  |
| ENSG00000167371 | AAGUGCU  |
| ENSG00000167371 | CAGGCUC  |
| ENSG00000167371 | CUCCAA   |
| ENSG00000167371 | CUUUGGU  |
| ENSG00000167371 | GAGCCC   |
| ENSG00000167371 | GGUGGU   |
| ENSG00000167371 | GUAAACA  |
| ENSG00000167384 | AGUGCUU  |
| ENSG00000167395 | AAAUUUC  |
| ENSG00000167395 | AGCAAAA  |
| ENSG00000167395 | UCCUGAG  |
| ENSG00000167397 | CAAAGCA  |
| ENSG00000167419 | AAGUCUU  |
| ENSG00000167419 | UGAAAUG  |
| ENSG00000167460 | ACCCUGU  |
| ENSG00000167460 | AGCAUUC  |
| ENSG00000167460 | CUUACAG  |
| ENSG00000167460 | GACUUC   |
| ENSG00000167460 | UCCACA   |
| ENSG00000167460 | UGACAUC  |
| ENSG00000167460 | UUGGUCC  |
| ENSG00000167461 | AAGUGCU  |
| ENSG00000167461 | CAGCUGG  |
| ENSG00000167461 | CUUUGGU  |
| ENSG00000167461 | GGCUCAG  |
| ENSG00000167461 | UCUCAA   |
| ENSG00000167468 | CACCAGC  |
| ENSG00000167470 | AACAAAC  |
| ENSG00000167470 | ACCAGCA  |
| ENSG00000167470 | AGCAGCG  |

|                 |          |
|-----------------|----------|
| ENSG00000167470 | GUUAAUG  |
| ENSG00000167470 | UAAUGCU  |
| ENSG00000167470 | UAGGUAU  |
| ENSG00000167470 | UCACAUU  |
| ENSG00000167470 | UGAAAUG  |
| ENSG00000167491 | AAAUCCC  |
| ENSG00000167491 | AAGGCAC  |
| ENSG00000167491 | ACCCUGU  |
| ENSG00000167491 | AUACAAG  |
| ENSG00000167491 | CAAAACU  |
| ENSG00000167491 | CACAAUG  |
| ENSG00000167491 | CACAGUG  |
| ENSG00000167491 | GGAAUGU  |
| ENSG00000167491 | UCACACA  |
| ENSG00000167491 | UGCAUAG  |
| ENSG00000167491 | UGCAUUA  |
| ENSG00000167491 | UGCCAGC  |
| ENSG00000167491 | UUCUGCA  |
| ENSG00000167522 | AAAAGUA  |
| ENSG00000167522 | AAACUGU  |
| ENSG00000167522 | AAAGUAC  |
| ENSG00000167522 | ACAGUAU  |
| ENSG00000167522 | AGCAAAA  |
| ENSG00000167522 | AUAU AAC |
| ENSG00000167522 | CUCCA UU |
| ENSG00000167522 | UACAGUU  |
| ENSG00000167522 | UCAAGUA  |
| ENSG00000167522 | UGCAAAG  |
| ENSG00000167522 | UUCAAGC  |
| ENSG00000167528 | AGCACCA  |
| ENSG00000167528 | GAGAAAU  |
| ENSG00000167528 | UGUGUGG  |
| ENSG00000167528 | UUAGGAU  |
| ENSG00000167535 | CCAGGAG  |
| ENSG00000167535 | CCCUGAG  |
| ENSG00000167535 | GAUUGUA  |
| ENSG00000167548 | AACUGGU  |
| ENSG00000167548 | AAUGCCC  |
| ENSG00000167548 | ACACACC  |
| ENSG00000167548 | ACACACU  |
| ENSG00000167548 | ACACGGG  |
| ENSG00000167548 | ACAUCAC  |
| ENSG00000167548 | ACCCGGC  |
| ENSG00000167548 | ACUCAGG  |
| ENSG00000167548 | ACUGCAG  |
| ENSG00000167548 | ACUGCAU  |
| ENSG00000167548 | AGAUAAA  |
| ENSG00000167548 | AGCAGCA  |
| ENSG00000167548 | AGCAGCU  |
| ENSG00000167548 | AGGCAGG  |
| ENSG00000167548 | AGGGUCU  |
| ENSG00000167548 | AGUAGUU  |
| ENSG00000167548 | AUAU AAC |
| ENSG00000167548 | AUGGAUU  |
| ENSG00000167548 | AUGUGCC  |
| ENSG00000167548 | CAAAGCA  |
| ENSG00000167548 | CACCACC  |
| ENSG00000167548 | CAGCAAA  |
| ENSG00000167548 | CAGCAGG  |
| ENSG00000167548 | CCAGCAU  |
| ENSG00000167548 | CCCCUGG  |
| ENSG00000167548 | CCUGCUG  |
| ENSG00000167548 | CUAUACA  |
| ENSG00000167548 | CUCAAAC  |

|                 |         |
|-----------------|---------|
| ENSG00000167548 | CUCACAC |
| ENSG00000167548 | CUCCAGC |
| ENSG00000167548 | CUCUUCC |
| ENSG00000167548 | CUGCAGC |
| ENSG00000167548 | CUGGCUC |
| ENSG00000167548 | CUGGGGG |
| ENSG00000167548 | CUUACAG |
| ENSG00000167548 | CUUGGAG |
| ENSG00000167548 | GAAAACA |
| ENSG00000167548 | GAGAACU |
| ENSG00000167548 | GAGAUGA |
| ENSG00000167548 | GAGGUAG |
| ENSG00000167548 | GAGGUAU |
| ENSG00000167548 | GAGUAUU |
| ENSG00000167548 | GAGUUGG |
| ENSG00000167548 | GAUUGUC |
| ENSG00000167548 | GCAGCAU |
| ENSG00000167548 | GCAGGAC |
| ENSG00000167548 | GCCCUUA |
| ENSG00000167548 | GCCUGGA |
| ENSG00000167548 | GCCUGGG |
| ENSG00000167548 | GGAAGAC |
| ENSG00000167548 | GGCAGUG |
| ENSG00000167548 | GGCUCUG |
| ENSG00000167548 | GGCUGCG |
| ENSG00000167548 | GGGAGCU |
| ENSG00000167548 | GGGGUGG |
| ENSG00000167548 | GGGUCUU |
| ENSG00000167548 | GGUGCGG |
| ENSG00000167548 | GUAAACA |
| ENSG00000167548 | GUCCAGA |
| ENSG00000167548 | GUCUGCC |
| ENSG00000167548 | GUGACUG |
| ENSG00000167548 | GUGAGGU |
| ENSG00000167548 | UACAGUU |
| ENSG00000167548 | UAUAAAG |
| ENSG00000167548 | UCACACA |
| ENSG00000167548 | UCACAUU |
| ENSG00000167548 | UCACCAC |
| ENSG00000167548 | UCCCACC |
| ENSG00000167548 | UCCCUUU |
| ENSG00000167548 | UCCUUGC |
| ENSG00000167548 | UCUCACC |
| ENSG00000167548 | UCUUGAG |
| ENSG00000167548 | UGCAUUA |
| ENSG00000167548 | UGCAUUG |
| ENSG00000167548 | UGCCAGC |
| ENSG00000167548 | UGCCUG  |
| ENSG00000167548 | UGGGAUC |
| ENSG00000167548 | UGGGGGA |
| ENSG00000167548 | UGUGCGG |
| ENSG00000167548 | UGUGCGU |
| ENSG00000167548 | UUCAAAU |
| ENSG00000167549 | AGCACCA |
| ENSG00000167549 | GGAGGCA |
| ENSG00000167550 | GUGCAAA |
| ENSG00000167552 | AGCAGCA |
| ENSG00000167552 | CCCUGUC |
| ENSG00000167552 | CCCUGUU |
| ENSG00000167565 | AAGGCAC |
| ENSG00000167565 | AUUGCAC |
| ENSG00000167565 | CCUGAG  |
| ENSG00000167565 | CGGCCUG |
| ENSG00000167565 | GGGUCC  |

|                 |         |
|-----------------|---------|
| ENSG00000167566 | AGCACCA |
| ENSG00000167566 | CAGACAG |
| ENSG00000167566 | CCCUGAG |
| ENSG00000167566 | GAGCUGC |
| ENSG00000167566 | GCAACUU |
| ENSG00000167566 | GCACCAU |
| ENSG00000167566 | GCAGAAG |
| ENSG00000167566 | GGCUCAG |
| ENSG00000167566 | UUGGUCC |
| ENSG00000167578 | AGCAGCA |
| ENSG00000167578 | GGCUCAG |
| ENSG00000167578 | GGGCCCC |
| ENSG00000167578 | GUCUUGC |
| ENSG00000167580 | AAUCUCA |
| ENSG00000167580 | AAUCUCU |
| ENSG00000167580 | ACCUGGA |
| ENSG00000167580 | ACUGGCC |
| ENSG00000167580 | AUUGCAC |
| ENSG00000167580 | GCCUGU  |
| ENSG00000167580 | GCCUGGA |
| ENSG00000167580 | GGACCUG |
| ENSG00000167580 | GGGUGGU |
| ENSG00000167580 | UACAGUU |
| ENSG00000167580 | UAUUGCU |
| ENSG00000167580 | UGCCUG  |
| ENSG00000167580 | UGGCCAC |
| ENSG00000167580 | UUCAAGC |
| ENSG00000167588 | AAAGAGG |
| ENSG00000167588 | AACACUG |
| ENSG00000167588 | CACAGGG |
| ENSG00000167588 | CAGCAGA |
| ENSG00000167588 | CAGCAGG |
| ENSG00000167588 | GGAGUCC |
| ENSG00000167588 | GGGGAGC |
| ENSG00000167588 | GUGACAG |
| ENSG00000167588 | GUGGGGA |
| ENSG00000167588 | UGCCAGC |
| ENSG00000167588 | UGCUGAC |
| ENSG00000167595 | CUUUGGU |
| ENSG00000167601 | AUGCAUU |
| ENSG00000167601 | GGCUCAG |
| ENSG00000167601 | UCCUGAG |
| ENSG00000167601 | UGCAUUG |
| ENSG00000167604 | CAGUCCA |
| ENSG00000167604 | CUGGAAA |
| ENSG00000167604 | UCACAGG |
| ENSG00000167604 | UCACAGU |
| ENSG00000167614 | AGUGCCG |
| ENSG00000167614 | AGUGCCU |
| ENSG00000167614 | GGCAGGG |
| ENSG00000167614 | UCCCUUG |
| ENSG00000167615 | CAGUCCA |
| ENSG00000167615 | CAGUUAC |
| ENSG00000167615 | GACAACU |
| ENSG00000167615 | GCAGAAG |
| ENSG00000167615 | GGAGGCA |
| ENSG00000167615 | UCCAGUU |
| ENSG00000167615 | UCUCAAG |
| ENSG00000167615 | UCUGGAA |
| ENSG00000167615 | UGAUCCA |
| ENSG00000167619 | UUCUGCA |
| ENSG00000167619 | UUGGCAC |
| ENSG00000167635 | AAAAGUA |
| ENSG00000167635 | AAGACAU |

|                 |         |
|-----------------|---------|
| ENSG00000167635 | CUACAAA |
| ENSG00000167635 | GCAACUU |
| ENSG00000167645 | GAGAUGA |
| ENSG00000167653 | GCUUCCU |
| ENSG00000167654 | AAGGCAC |
| ENSG00000167654 | ACCCUGU |
| ENSG00000167654 | AGGGUCU |
| ENSG00000167654 | GAGUGUG |
| ENSG00000167654 | GCUGGUG |
| ENSG00000167658 | GGGCCCC |
| ENSG00000167670 | AAAGUGC |
| ENSG00000167670 | AAGUGCU |
| ENSG00000167670 | CAAAGUG |
| ENSG00000167670 | GCAGGAC |
| ENSG00000167670 | UAAUGCU |
| ENSG00000167680 | AGCCCUU |
| ENSG00000167680 | CAGCUGG |
| ENSG00000167680 | CUGCAGC |
| ENSG00000167680 | GGAAGCC |
| ENSG00000167680 | GUAAACA |
| ENSG00000167680 | GUGCAAA |
| ENSG00000167680 | GUGCUUG |
| ENSG00000167680 | UCACAAG |
| ENSG00000167680 | UCCAGAG |
| ENSG00000167680 | UGUGCUU |
| ENSG00000167693 | AAGGCAC |
| ENSG00000167693 | ACCACAG |
| ENSG00000167693 | GAAGGAA |
| ENSG00000167693 | GCAGAAG |
| ENSG00000167693 | GGAGGAG |
| ENSG00000167693 | GUCCAGA |
| ENSG00000167693 | UCAACAG |
| ENSG00000167693 | UCCAGAG |
| ENSG00000167693 | UCUCCAA |
| ENSG00000167695 | AAAGUGC |
| ENSG00000167695 | AGUGCUU |
| ENSG00000167695 | UGCAAAG |
| ENSG00000167695 | UUGGCAC |
| ENSG00000167695 | UUUGCAC |
| ENSG00000167702 | AGCACCA |
| ENSG00000167702 | CCUGCUG |
| ENSG00000167702 | CUGGGGG |
| ENSG00000167702 | UGGGGGA |
| ENSG00000167703 | AGCACCA |
| ENSG00000167703 | GAGGCAG |
| ENSG00000167703 | GGCAAGA |
| ENSG00000167703 | UUGGCAA |
| ENSG00000167711 | AAUCACU |
| ENSG00000167711 | AUCACUA |
| ENSG00000167711 | AUUCAUU |
| ENSG00000167711 | CAGGUGA |
| ENSG00000167711 | CUACAAA |
| ENSG00000167711 | UACAAAG |
| ENSG00000167711 | UCAUUCG |
| ENSG00000167716 | AAGGCAC |
| ENSG00000167716 | AGCACCA |
| ENSG00000167716 | AUUGCAC |
| ENSG00000167716 | CUCUUCC |
| ENSG00000167716 | GCACCAU |
| ENSG00000167716 | UGCAAAG |
| ENSG00000167723 | CUGCAGC |
| ENSG00000167723 | UGAAAUG |
| ENSG00000167747 | AGUGCUU |
| ENSG00000167766 | UCCACA  |

|                 |         |
|-----------------|---------|
| ENSG00000167766 | UCCCACC |
| ENSG00000167767 | AAUACUG |
| ENSG00000167767 | AAUCUCA |
| ENSG00000167767 | AGGGAGG |
| ENSG00000167767 | CCUUCUU |
| ENSG00000167767 | GGCAAGA |
| ENSG00000167767 | GGCCCUG |
| ENSG00000167767 | UCCCUUG |
| ENSG00000167768 | GUCUUGC |
| ENSG00000167768 | UUCAAAU |
| ENSG00000167770 | AAAAACC |
| ENSG00000167770 | AGGAGCU |
| ENSG00000167770 | CACCACC |
| ENSG00000167770 | CACCAGC |
| ENSG00000167770 | CUGCCCC |
| ENSG00000167770 | GCCUGGG |
| ENSG00000167770 | GGGGUGC |
| ENSG00000167770 | UCACCAC |
| ENSG00000167772 | CUUCUCU |
| ENSG00000167772 | GAGCCCC |
| ENSG00000167772 | UCCUCU  |
| ENSG00000167775 | CAGCAGG |
| ENSG00000167775 | GGAGUGU |
| ENSG00000167778 | AACACUG |
| ENSG00000167778 | AAGUCAC |
| ENSG00000167778 | AGCAGCU |
| ENSG00000167778 | GUGCAA  |
| ENSG00000167778 | UCACACA |
| ENSG00000167778 | UGUAUAA |
| ENSG00000167785 | CUCCAGC |
| ENSG00000167797 | AGGCAGG |
| ENSG00000167797 | GGCAGGG |
| ENSG00000167799 | CAGCAGG |
| ENSG00000167799 | GCAGAAG |
| ENSG00000167799 | GGAAGAC |
| ENSG00000167842 | GGAAGAC |
| ENSG00000167851 | GUCCAGA |
| ENSG00000167861 | GAUUGUA |
| ENSG00000167881 | AAAAAUC |
| ENSG00000167889 | UAUUGCU |
| ENSG00000167904 | ACUGCAG |
| ENSG00000167904 | AUACAAG |
| ENSG00000167904 | GUGCUUG |
| ENSG00000167904 | UUGCAA  |
| ENSG00000167930 | AAGGCAC |
| ENSG00000167930 | CCAGUGU |
| ENSG00000167941 | GAGAAAU |
| ENSG00000167941 | GAGGUAG |
| ENSG00000167941 | GGCUCAG |
| ENSG00000167941 | UCAUUCG |
| ENSG00000167941 | UGCAUAG |
| ENSG00000167941 | UGCAUUA |
| ENSG00000167941 | UGUGCUU |
| ENSG00000167941 | UUUGCAA |
| ENSG00000167941 | UUUGCAC |
| ENSG00000167971 | AAAGUUU |
| ENSG00000167971 | AAGGCAC |
| ENSG00000167971 | AAUACUG |
| ENSG00000167971 | AGCAGCA |
| ENSG00000167971 | AUUGCAC |
| ENSG00000167971 | CAGACAG |
| ENSG00000167971 | CAGCAA  |
| ENSG00000167971 | GAGCCCU |
| ENSG00000167971 | GAGGUAG |



|                 |         |
|-----------------|---------|
| ENSG00000167971 | GAGGUAU |
| ENSG00000167971 | GUGCUUG |
| ENSG00000167971 | UAAUACA |
| ENSG00000167971 | UCCUGAG |
| ENSG00000167971 | UGUGCUU |
| ENSG00000167977 | AAGGCAC |
| ENSG00000167977 | CUGGAAA |
| ENSG00000167977 | GCAGGUU |
| ENSG00000167977 | GUAAACA |
| ENSG00000167977 | UAGUGAG |
| ENSG00000167977 | UGCAUAG |
| ENSG00000167978 | AUGCCUU |
| ENSG00000167978 | CAGGAAC |
| ENSG00000167978 | CCCACCG |
| ENSG00000167978 | CCCACCU |
| ENSG00000167978 | CUCCAC  |
| ENSG00000167978 | UCACAGU |
| ENSG00000167978 | UCCCACC |
| ENSG00000167978 | UGGGGGA |
| ENSG00000167984 | CUUCUCU |
| ENSG00000167987 | AGCAGCA |
| ENSG00000167987 | AGCAGCG |
| ENSG00000167987 | AGCAGCU |
| ENSG00000167987 | GAGACCU |
| ENSG00000167987 | GGGGCAG |
| ENSG00000167987 | UAUAAAG |
| ENSG00000167994 | CUUUGGU |
| ENSG00000167994 | GGGUGC  |
| ENSG00000167995 | CAGUGCA |
| ENSG00000167995 | CCUUCAU |
| ENSG00000167995 | UUCAAAU |
| ENSG00000167996 | UGGGUAC |
| ENSG00000167996 | UGGUACC |
| ENSG00000168000 | GGAAUGU |
| ENSG00000168032 | CCAGGAG |
| ENSG00000168036 | AAAAAUC |
| ENSG00000168036 | AACUCUA |
| ENSG00000168036 | AACUGGU |
| ENSG00000168036 | ACAAGGU |
| ENSG00000168036 | ACUCAGC |
| ENSG00000168036 | AGUGUGC |
| ENSG00000168036 | AUACAAG |
| ENSG00000168036 | CUUGUGU |
| ENSG00000168036 | GAGCCCU |
| ENSG00000168036 | GUCACUC |
| ENSG00000168036 | GUGUCAC |
| ENSG00000168036 | UGGGAUC |
| ENSG00000168036 | UGUGUCA |
| ENSG00000168036 | UUCUUGU |
| ENSG00000168066 | AAUCACU |
| ENSG00000168066 | ACAUUCA |
| ENSG00000168066 | CAGCAGA |
| ENSG00000168066 | GAGGCAG |
| ENSG00000168066 | GCAGAAG |
| ENSG00000168067 | AGCAGCU |
| ENSG00000168067 | CUCAGGG |
| ENSG00000168067 | UAUUGCU |
| ENSG00000168067 | UCCAGUU |
| ENSG00000168071 | CAGCUGG |
| ENSG00000168071 | CUUGGGC |
| ENSG00000168071 | GCCUGGG |
| ENSG00000168077 | CUGGAAA |
| ENSG00000168079 | ACCUGGA |
| ENSG00000168079 | AUGUAAU |

|                 |         |
|-----------------|---------|
| ENSG00000168081 | CAUGGGU |
| ENSG00000168081 | UGCUCAC |
| ENSG00000168090 | GGGGUGC |
| ENSG00000168090 | UCAAGUA |
| ENSG00000168092 | AACACUG |
| ENSG00000168096 | AAUUUUA |
| ENSG00000168118 | ACUGCAU |
| ENSG00000168135 | GAGUGUG |
| ENSG00000168137 | AUUGCAC |
| ENSG00000168137 | CAAAUGC |
| ENSG00000168137 | UAUUACC |
| ENSG00000168137 | UCUCCAA |
| ENSG00000168137 | UUCAAAU |
| ENSG00000168140 | AAAAACC |
| ENSG00000168140 | ACCAGCA |
| ENSG00000168140 | CAGCAGG |
| ENSG00000168140 | CCCCCAG |
| ENSG00000168140 | CCUUCAU |
| ENSG00000168140 | UACAAAG |
| ENSG00000168148 | AAAGAGC |
| ENSG00000168148 | GGCUCUG |
| ENSG00000168172 | AAGACAU |
| ENSG00000168172 | AAUUAAU |
| ENSG00000168172 | CAGCAAA |
| ENSG00000168172 | UCCCUUG |
| ENSG00000168172 | UCCUGAG |
| ENSG00000168172 | UGAAAUG |
| ENSG00000168172 | UGCCAGC |
| ENSG00000168172 | UUGGCAA |
| ENSG00000168172 | UUUGCAA |
| ENSG00000168175 | AAAGCUG |
| ENSG00000168175 | AAAGUUU |
| ENSG00000168175 | AAAUUUC |
| ENSG00000168175 | AAUGCCC |
| ENSG00000168175 | ACAUUCA |
| ENSG00000168175 | AGCAGCA |
| ENSG00000168175 | AGUGCCU |
| ENSG00000168175 | CAGCAGG |
| ENSG00000168175 | CAGGUGA |
| ENSG00000168175 | CCCUGAG |
| ENSG00000168175 | CUCUUCC |
| ENSG00000168175 | CUGGACU |
| ENSG00000168175 | GAGGUAG |
| ENSG00000168175 | GAUUGUC |
| ENSG00000168175 | GGCAUUG |
| ENSG00000168175 | GUCAACA |
| ENSG00000168175 | GUGAAUG |
| ENSG00000168175 | GUGACAG |
| ENSG00000168175 | GUGAGGU |
| ENSG00000168175 | UAUUGCU |
| ENSG00000168175 | UCAUGAU |
| ENSG00000168175 | UCAUUUG |
| ENSG00000168175 | UCCCUGU |
| ENSG00000168175 | UGCAUUA |
| ENSG00000168175 | UUGGCAA |
| ENSG00000168175 | UUGGCAC |
| ENSG00000168209 | AAUACUG |
| ENSG00000168209 | AGUGAUC |
| ENSG00000168209 | AUGGCAC |
| ENSG00000168209 | AUUGCAC |
| ENSG00000168209 | CAGUAGA |
| ENSG00000168209 | CAGUAGU |
| ENSG00000168209 | CUUACAG |
| ENSG00000168209 | GGAAGAC |

|                 |         |
|-----------------|---------|
| ENSG00000168209 | GUAUUCU |
| ENSG00000168209 | UAAUACA |
| ENSG00000168209 | UCUAGAG |
| ENSG00000168209 | UGCAUAU |
| ENSG00000168214 | UUGGUCC |
| ENSG00000168228 | AAAGAAU |
| ENSG00000168228 | AAGGUGC |
| ENSG00000168228 | CAGCAA  |
| ENSG00000168228 | GUAAACA |
| ENSG00000168228 | GUGUGGC |
| ENSG00000168228 | UCAUUUG |
| ENSG00000168229 | AAGUGCU |
| ENSG00000168229 | AAUGCCC |
| ENSG00000168229 | CACAGUG |
| ENSG00000168229 | CCCACCU |
| ENSG00000168229 | GACCUGG |
| ENSG00000168229 | UCACAGG |
| ENSG00000168234 | AAAGUGC |
| ENSG00000168242 | GGCUCUG |
| ENSG00000168243 | GUUAAUG |
| ENSG00000168243 | UGAAGUG |
| ENSG00000168246 | AAGGCAC |
| ENSG00000168246 | AAUUAAU |
| ENSG00000168246 | AGCACCA |
| ENSG00000168246 | AGCAGCA |
| ENSG00000168246 | CUCCAUI |
| ENSG00000168246 | CUGGCUC |
| ENSG00000168246 | GAGUCUU |
| ENSG00000168246 | GCACCAU |
| ENSG00000168246 | GGCUCUG |
| ENSG00000168246 | UAUUGCU |
| ENSG00000168246 | UCAAGUA |
| ENSG00000168246 | UGAGUCU |
| ENSG00000168246 | UUGUGUC |
| ENSG00000168255 | AUGAUGA |
| ENSG00000168255 | CACCACC |
| ENSG00000168255 | CACCAGC |
| ENSG00000168255 | GAAGGUC |
| ENSG00000168255 | GGCCUG  |
| ENSG00000168255 | UGGCCCU |
| ENSG00000168256 | AGCACCA |
| ENSG00000168256 | CACUCCU |
| ENSG00000168256 | CCCUGG  |
| ENSG00000168256 | CCCUGAG |
| ENSG00000168256 | CUUCACC |
| ENSG00000168256 | GAGGUAG |
| ENSG00000168256 | GAGGUAU |
| ENSG00000168256 | GCUUCCU |
| ENSG00000168256 | UGUGUCA |
| ENSG00000168259 | AUAAAGU |
| ENSG00000168264 | AAAGUGC |
| ENSG00000168264 | AACAAAC |
| ENSG00000168264 | AAGUCAC |
| ENSG00000168264 | AGCAGCG |
| ENSG00000168264 | AGUGCCU |
| ENSG00000168264 | CACCAGC |
| ENSG00000168264 | CAGACAG |
| ENSG00000168264 | CAGCUGG |
| ENSG00000168264 | CAGUCUG |
| ENSG00000168264 | CUCCAA  |
| ENSG00000168264 | CUUGGAG |
| ENSG00000168264 | GGCAGUG |
| ENSG00000168264 | GUAUUCU |
| ENSG00000168264 | GUCAUUG |

|                 |         |
|-----------------|---------|
| ENSG00000168264 | GUCUUGC |
| ENSG00000168264 | UACAAAG |
| ENSG00000168264 | UCCCUUU |
| ENSG00000168264 | UGGAUAA |
| ENSG00000168264 | UUCUGCA |
| ENSG00000168267 | AUAUAAC |
| ENSG00000168267 | AUUGCAC |
| ENSG00000168267 | UGCAUAG |
| ENSG00000168269 | CUUGGAG |
| ENSG00000168274 | AAAGAGC |
| ENSG00000168274 | GGGUGGU |
| ENSG00000168280 | AAAAAUC |
| ENSG00000168280 | ACUGGCU |
| ENSG00000168280 | AGCAGCG |
| ENSG00000168280 | CAGCAA  |
| ENSG00000168280 | CAGUCUG |
| ENSG00000168280 | CCCCUGG |
| ENSG00000168280 | CUACAGU |
| ENSG00000168280 | CUGCAGC |
| ENSG00000168280 | CUGCAGG |
| ENSG00000168280 | CUUUGGU |
| ENSG00000168280 | GAUCAGA |
| ENSG00000168280 | GUCUGCC |
| ENSG00000168280 | UACAAAG |
| ENSG00000168282 | AGAUAAA |
| ENSG00000168283 | AAAGCUG |
| ENSG00000168283 | AAUACUG |
| ENSG00000168283 | ACUGUUU |
| ENSG00000168283 | AUGGCAC |
| ENSG00000168283 | GAAUUGU |
| ENSG00000168283 | GAUUGUA |
| ENSG00000168283 | GCUACAU |
| ENSG00000168283 | GUGCUUG |
| ENSG00000168283 | UCACAGG |
| ENSG00000168283 | UGAAAUG |
| ENSG00000168286 | AAAAACC |
| ENSG00000168286 | AGCAAAA |
| ENSG00000168291 | GUAACAG |
| ENSG00000168297 | GUAAACA |
| ENSG00000168298 | AAAGAGC |
| ENSG00000168300 | AAAGUGC |
| ENSG00000168300 | AAGUGCA |
| ENSG00000168300 | CAGUAGA |
| ENSG00000168300 | CAGUAGU |
| ENSG00000168300 | GCUGGUG |
| ENSG00000168300 | UAUUGCU |
| ENSG00000168300 | UUCAAGC |
| ENSG00000168300 | UUGGCAA |
| ENSG00000168300 | UUGGCAC |
| ENSG00000168309 | GAAGGAA |
| ENSG00000168309 | GACUUCC |
| ENSG00000168309 | GGCAGUG |
| ENSG00000168309 | GGGUCUU |
| ENSG00000168309 | UUGGCAA |
| ENSG00000168310 | AAAUUUC |
| ENSG00000168310 | AGGAUGU |
| ENSG00000168310 | AUGAGCU |
| ENSG00000168310 | AUGUAAU |
| ENSG00000168310 | GCAGAAG |
| ENSG00000168310 | UCCUGAG |
| ENSG00000168310 | UGUAUAA |
| ENSG00000168310 | UUCAAGC |
| ENSG00000168310 | UUGGUCC |
| ENSG00000168314 | AGGCAGG |

|                 |         |
|-----------------|---------|
| ENSG00000168314 | CAGCAGA |
| ENSG00000168314 | UGGACUG |
| ENSG00000168334 | UUGGUCC |
| ENSG00000168348 | UCACAGG |
| ENSG00000168348 | UCACAGU |
| ENSG00000168348 | UCUAGAG |
| ENSG00000168348 | UUCCAU  |
| ENSG00000168356 | GAAACAU |
| ENSG00000168356 | GAGGUAU |
| ENSG00000168385 | AAGUGCA |
| ENSG00000168385 | AGCAAAA |
| ENSG00000168385 | CAAAACU |
| ENSG00000168385 | UUCAAAU |
| ENSG00000168385 | UUUCAAC |
| ENSG00000168394 | UAUAAAG |
| ENSG00000168395 | ACAUUAC |
| ENSG00000168395 | ACUGGCC |
| ENSG00000168395 | AGGUAGU |
| ENSG00000168395 | CACAGUG |
| ENSG00000168395 | CUUCACC |
| ENSG00000168395 | GGAUGAG |
| ENSG00000168395 | GGCUCAG |
| ENSG00000168395 | UCACAGG |
| ENSG00000168395 | UCCUUGC |
| ENSG00000168397 | AGCCCUU |
| ENSG00000168397 | CAGGCUC |
| ENSG00000168397 | GAGGUAG |
| ENSG00000168397 | GGCAGUG |
| ENSG00000168398 | GGCAGCG |
| ENSG00000168398 | GGGGCAG |
| ENSG00000168404 | UUCUUGU |
| ENSG00000168411 | ACUUGGA |
| ENSG00000168411 | AGCAGCA |
| ENSG00000168411 | CUCUGGG |
| ENSG00000168411 | GCAGCAU |
| ENSG00000168411 | UCCUGAG |
| ENSG00000168418 | GGGGCAG |
| ENSG00000168438 | AUGGCUU |
| ENSG00000168439 | ACUGGCU |
| ENSG00000168439 | CUGCCCC |
| ENSG00000168439 | UGUAUAA |
| ENSG00000168447 | ACCAGCA |
| ENSG00000168453 | ACCACAG |
| ENSG00000168453 | AGCAGCA |
| ENSG00000168453 | CAGGAAC |
| ENSG00000168453 | UGCCAGC |
| ENSG00000168453 | UGGUACC |
| ENSG00000168461 | UCAAGUA |
| ENSG00000168476 | CUUUGGU |
| ENSG00000168476 | UCAAGUA |
| ENSG00000168477 | CAGUGCA |
| ENSG00000168477 | CUGGCUC |
| ENSG00000168477 | CUUCUCU |
| ENSG00000168477 | GGCUCUG |
| ENSG00000168477 | GUAAACA |
| ENSG00000168477 | UAUUGCU |
| ENSG00000168481 | GCAGAAG |
| ENSG00000168481 | UAUUGCU |
| ENSG00000168484 | UGCUCAC |
| ENSG00000168487 | AACACUG |
| ENSG00000168487 | GGAGUCC |
| ENSG00000168487 | GUAACAG |
| ENSG00000168487 | UGCCUG  |
| ENSG00000168487 | UGGCUGC |

|                 |         |
|-----------------|---------|
| ENSG00000168488 | AAGGUGC |
| ENSG00000168488 | CAGGAAC |
| ENSG00000168488 | CUCCAGC |
| ENSG00000168488 | GGCCUG  |
| ENSG00000168488 | GUGCUUG |
| ENSG00000168488 | GUUAAUG |
| ENSG00000168488 | UAUAAAG |
| ENSG00000168490 | CCAGGAG |
| ENSG00000168490 | CCCUGAG |
| ENSG00000168490 | CUCAGGG |
| ENSG00000168490 | GGAGAGA |
| ENSG00000168490 | GGCCUG  |
| ENSG00000168490 | GGUUUAC |
| ENSG00000168491 | AAUUUUA |
| ENSG00000168495 | CCUUCUG |
| ENSG00000168495 | GAGGUAG |
| ENSG00000168495 | UCUGGAG |
| ENSG00000168497 | UCACAGG |
| ENSG00000168497 | UCACAGU |
| ENSG00000168502 | ACAUUCA |
| ENSG00000168505 | UACAAAG |
| ENSG00000168522 | AGCAGCA |
| ENSG00000168528 | AAGUCUU |
| ENSG00000168528 | UUAGAGA |
| ENSG00000168538 | CAAAGCA |
| ENSG00000168539 | ACUCAGC |
| ENSG00000168539 | AGGGAGG |
| ENSG00000168539 | GCAGCAU |
| ENSG00000168539 | GCCUGGA |
| ENSG00000168539 | GGGGUGG |
| ENSG00000168539 | UCACAGG |
| ENSG00000168539 | UCACAGU |
| ENSG00000168539 | UGGAGAU |
| ENSG00000168542 | AGGUAGU |
| ENSG00000168542 | GAGGUAU |
| ENSG00000168546 | ACAAGGU |
| ENSG00000168546 | AUAAUAC |
| ENSG00000168546 | GCUUCCU |
| ENSG00000168546 | UAAUACA |
| ENSG00000168546 | UUCCUAG |
| ENSG00000168546 | UUGGUUC |
| ENSG00000168546 | UUUGCAC |
| ENSG00000168556 | AAUUAUU |
| ENSG00000168556 | AUUGCAC |
| ENSG00000168556 | UGCAUUA |
| ENSG00000168564 | AAAACUG |
| ENSG00000168575 | AAAUUUC |
| ENSG00000168575 | AAUUUUA |
| ENSG00000168575 | AGCAGCG |
| ENSG00000168575 | AGCAGCU |
| ENSG00000168575 | AGUAGUU |
| ENSG00000168575 | AUAUAAC |
| ENSG00000168575 | CAGUAGU |
| ENSG00000168575 | CUAGGCU |
| ENSG00000168575 | UAUAAAG |
| ENSG00000168575 | UGGUACC |
| ENSG00000168591 | AAAGUGC |
| ENSG00000168591 | AAGUGCU |
| ENSG00000168591 | AGCAGCA |
| ENSG00000168591 | AGCAGCU |
| ENSG00000168591 | AGUGCUU |
| ENSG00000168591 | AUGCCUU |
| ENSG00000168591 | CAAAGUG |
| ENSG00000168591 | CUGGGGG |

|                 |          |
|-----------------|----------|
| ENSG00000168591 | GAGCUGC  |
| ENSG00000168591 | UGUGC UU |
| ENSG00000168610 | AAAAAUC  |
| ENSG00000168610 | AAAGUAA  |
| ENSG00000168610 | AAAGUAC  |
| ENSG00000168610 | AAAGUAU  |
| ENSG00000168610 | AAAUUUC  |
| ENSG00000168610 | AAGGCAC  |
| ENSG00000168610 | AAGUGCA  |
| ENSG00000168610 | AGCAGCU  |
| ENSG00000168610 | CCAGGAG  |
| ENSG00000168610 | CCCUGAG  |
| ENSG00000168610 | CUGGGGG  |
| ENSG00000168610 | GGAGGCA  |
| ENSG00000168612 | ACA AUUC |
| ENSG00000168612 | ACA UUCA |
| ENSG00000168615 | ACA AUUC |
| ENSG00000168615 | AAGUGCU  |
| ENSG00000168615 | AGUGGUU  |
| ENSG00000168615 | CCCUGAG  |
| ENSG00000168615 | CGUACCG  |
| ENSG00000168646 | AAGUAGC  |
| ENSG00000168646 | ACA AUAU |
| ENSG00000168646 | ACAGUAC  |
| ENSG00000168646 | ACUGUAG  |
| ENSG00000168646 | ACUUGGA  |
| ENSG00000168646 | CCUUCAU  |
| ENSG00000168646 | CUAUACA  |
| ENSG00000168646 | CUC AAAC |
| ENSG00000168646 | CUUGGAG  |
| ENSG00000168646 | GCUACA U |
| ENSG00000168646 | UACAGUU  |
| ENSG00000168646 | UAUAAUA  |
| ENSG00000168661 | UCCCACA  |
| ENSG00000168672 | AAAGAGC  |
| ENSG00000168672 | AAAGUAU  |
| ENSG00000168672 | AAAGUGC  |
| ENSG00000168672 | AACACUG  |
| ENSG00000168672 | ACA AUUC |
| ENSG00000168672 | ACAGUAC  |
| ENSG00000168672 | CAAGAGC  |
| ENSG00000168672 | CACAGUG  |
| ENSG00000168672 | CAGCAGG  |
| ENSG00000168672 | CCCCUGG  |
| ENSG00000168672 | CCUUCUG  |
| ENSG00000168672 | CCUUCUU  |
| ENSG00000168672 | CUACAAA  |
| ENSG00000168672 | CUCCA UU |
| ENSG00000168672 | GAGUCUU  |
| ENSG00000168672 | GCAGGUU  |
| ENSG00000168672 | GCCCUUA  |
| ENSG00000168672 | GCUUCCU  |
| ENSG00000168672 | UCAUUUG  |
| ENSG00000168672 | UCUCCAA  |
| ENSG00000168672 | UGGUACC  |
| ENSG00000168672 | UGUCUGG  |
| ENSG00000168675 | AAACUGU  |
| ENSG00000168675 | AAAGCUG  |
| ENSG00000168675 | AAAUUUC  |
| ENSG00000168675 | AAGGCAC  |
| ENSG00000168675 | ACAGUAC  |
| ENSG00000168675 | ACA UAGA |
| ENSG00000168675 | ACA UUAC |
| ENSG00000168675 | ACCCA UU |

|                 |         |
|-----------------|---------|
| ENSG00000168675 | ACUCCAG |
| ENSG00000168675 | AGCACCA |
| ENSG00000168675 | AUGCAUU |
| ENSG00000168675 | AUGUGCC |
| ENSG00000168675 | CACACCU |
| ENSG00000168675 | CACUGUU |
| ENSG00000168675 | CAGACAG |
| ENSG00000168675 | CAGCAA  |
| ENSG00000168675 | CAGGUGA |
| ENSG00000168675 | CAUAUUG |
| ENSG00000168675 | CUAUACA |
| ENSG00000168675 | GAGGUAU |
| ENSG00000168675 | GCACCAU |
| ENSG00000168675 | GCAUCCC |
| ENSG00000168675 | GUGCUUG |
| ENSG00000168675 | UAAUAGU |
| ENSG00000168675 | UACAAAG |
| ENSG00000168675 | UAUUGCU |
| ENSG00000168675 | UCACAGG |
| ENSG00000168675 | UCCUGAG |
| ENSG00000168675 | UCCUUGC |
| ENSG00000168675 | UGAAAGG |
| ENSG00000168675 | UGCAUAG |
| ENSG00000168675 | UGCAUUA |
| ENSG00000168675 | UGCUCAC |
| ENSG00000168675 | UGGCUGC |
| ENSG00000168675 | UGGGUAC |
| ENSG00000168675 | UUGGCAC |
| ENSG00000168675 | UUUGCAA |
| ENSG00000168676 | AUGCAUU |
| ENSG00000168702 | AAAUGGU |
| ENSG00000168702 | AAGAACC |
| ENSG00000168702 | AGUGCAA |
| ENSG00000168702 | GAAACAU |
| ENSG00000168702 | GCAGCAU |
| ENSG00000168710 | AGCAGCU |
| ENSG00000168710 | AGCCCUU |
| ENSG00000168710 | AUGCACC |
| ENSG00000168710 | AUGGCUU |
| ENSG00000168710 | AUUCAUU |
| ENSG00000168710 | AUUGCAC |
| ENSG00000168710 | GAGCCCU |
| ENSG00000168710 | GCCCUUA |
| ENSG00000168710 | UAAGACG |
| ENSG00000168710 | UAAUAUC |
| ENSG00000168710 | UCCCUCU |
| ENSG00000168710 | UGCAUUG |
| ENSG00000168710 | UGCUCAC |
| ENSG00000168710 | UUGGCAC |
| ENSG00000168724 | AACUCUA |
| ENSG00000168724 | AAUCACU |
| ENSG00000168724 | ACAUUCA |
| ENSG00000168724 | AUCACUA |
| ENSG00000168724 | AUUCAUU |
| ENSG00000168724 | CACAAUG |
| ENSG00000168724 | CCCUGUC |
| ENSG00000168724 | CCCUGUU |
| ENSG00000168724 | GAGCUAA |
| ENSG00000168724 | UCCCUGU |
| ENSG00000168724 | UCUAGAG |
| ENSG00000168724 | UUGGUUC |
| ENSG00000168734 | AAAAGUA |
| ENSG00000168743 | ACAGUAU |
| ENSG00000168743 | AGCUGCC |



|                 |         |
|-----------------|---------|
| ENSG00000168743 | AUUGCAC |
| ENSG00000168743 | CUUCUCU |
| ENSG00000168743 | GCAACUU |
| ENSG00000168743 | GCCUGAU |
| ENSG00000168743 | GGCAGUG |
| ENSG00000168743 | UCUGGAG |
| ENSG00000168743 | UUCCUCG |
| ENSG00000168743 | UUCUUGU |
| ENSG00000168748 | AAUUAUU |
| ENSG00000168748 | AGCCCUU |
| ENSG00000168748 | CACAGUG |
| ENSG00000168748 | CCCACCU |
| ENSG00000168748 | CUCCAGC |
| ENSG00000168748 | CUUGGAG |
| ENSG00000168748 | CUUUGGU |
| ENSG00000168748 | GGAAGAC |
| ENSG00000168748 | GGCAGUG |
| ENSG00000168748 | GUCUGCC |
| ENSG00000168748 | GUGAGGU |
| ENSG00000168748 | UCACAGU |
| ENSG00000168748 | UGAGUCU |
| ENSG00000168748 | UGCUGAC |
| ENSG00000168748 | UGUCUGC |
| ENSG00000168758 | AAAAAUC |
| ENSG00000168758 | ACAUCUC |
| ENSG00000168758 | ACAUUCA |
| ENSG00000168758 | CCCUGAG |
| ENSG00000168758 | GAAAACA |
| ENSG00000168758 | GAGGUAG |
| ENSG00000168758 | GAGGUAU |
| ENSG00000168758 | GCUGGUG |
| ENSG00000168758 | GGAAGAC |
| ENSG00000168758 | GGCAGUG |
| ENSG00000168758 | GGGGUCC |
| ENSG00000168758 | GUGCCUG |
| ENSG00000168763 | AAAGUGC |
| ENSG00000168763 | AAGUGCU |
| ENSG00000168763 | AGUGCUG |
| ENSG00000168763 | CCCCCAG |
| ENSG00000168763 | CGUGGCC |
| ENSG00000168763 | GAAACAU |
| ENSG00000168763 | GGAAGCC |
| ENSG00000168763 | UCCAGAG |
| ENSG00000168763 | UGCCAGC |
| ENSG00000168763 | UUGGCAA |
| ENSG00000168763 | UUGGCAC |
| ENSG00000168769 | AUACAAG |
| ENSG00000168769 | AUGAUGA |
| ENSG00000168769 | AUGUGCC |
| ENSG00000168769 | CAAAGUG |
| ENSG00000168769 | CCUUCAU |
| ENSG00000168769 | CUCUGGG |
| ENSG00000168769 | CUGCCCC |
| ENSG00000168769 | CUGUUGA |
| ENSG00000168769 | GCCCUGU |
| ENSG00000168769 | GCCUGGA |
| ENSG00000168769 | GCCUGGG |
| ENSG00000168769 | GCUACAU |
| ENSG00000168769 | GGACCUG |
| ENSG00000168769 | GGGUUUA |
| ENSG00000168769 | GUAGUGU |
| ENSG00000168769 | GUGACUG |
| ENSG00000168769 | GUGCCUG |
| ENSG00000168769 | GUGUGGC |

|                 |          |
|-----------------|----------|
| ENSG00000168769 | UAAUAGU  |
| ENSG00000168769 | UAGUGAG  |
| ENSG00000168769 | UAUAAAAG |
| ENSG00000168769 | UCCUGAG  |
| ENSG00000168769 | UGCCAGC  |
| ENSG00000168769 | UGCCUG   |
| ENSG00000168769 | UGGACUG  |
| ENSG00000168769 | UGUGUGG  |
| ENSG00000168769 | UUGGCAA  |
| ENSG00000168772 | CUAUACA  |
| ENSG00000168778 | UCAUUUG  |
| ENSG00000168779 | AAAUUUC  |
| ENSG00000168779 | AACCUGU  |
| ENSG00000168779 | AAUGUUG  |
| ENSG00000168779 | ACUCAA   |
| ENSG00000168779 | AGAUAAA  |
| ENSG00000168779 | AGUAACA  |
| ENSG00000168779 | AUACAAG  |
| ENSG00000168779 | CAAAACU  |
| ENSG00000168779 | CAAAGCA  |
| ENSG00000168779 | CAAAGUG  |
| ENSG00000168779 | CAUGGAU  |
| ENSG00000168779 | CUCUCC   |
| ENSG00000168779 | GUCAGUU  |
| ENSG00000168779 | UCAACGG  |
| ENSG00000168779 | UCAUUCG  |
| ENSG00000168779 | UCAUUUG  |
| ENSG00000168779 | UUCAAAU  |
| ENSG00000168785 | ACAGUAC  |
| ENSG00000168785 | ACAGUAU  |
| ENSG00000168785 | AGCAGCA  |
| ENSG00000168785 | CAGUAGA  |
| ENSG00000168785 | CCAGUGC  |
| ENSG00000168785 | CCAGUGU  |
| ENSG00000168785 | CUACAGU  |
| ENSG00000168795 | AAUACUG  |
| ENSG00000168795 | ACAGUAU  |
| ENSG00000168795 | AUACAAG  |
| ENSG00000168795 | CAGACAG  |
| ENSG00000168795 | CCAGUGU  |
| ENSG00000168795 | CUCCAUU  |
| ENSG00000168795 | GAGGUAG  |
| ENSG00000168806 | UCAUUUG  |
| ENSG00000168807 | AAAGCUG  |
| ENSG00000168807 | AAAGUGC  |
| ENSG00000168807 | AAGUGCA  |
| ENSG00000168807 | ACAGUAC  |
| ENSG00000168807 | AGCACCA  |
| ENSG00000168807 | AGCAGCG  |
| ENSG00000168807 | AGCAGCU  |
| ENSG00000168807 | AGCUUAU  |
| ENSG00000168807 | AGGUAGU  |
| ENSG00000168807 | AGUGCUU  |
| ENSG00000168807 | AUAAAAGU |
| ENSG00000168807 | CCCUGAG  |
| ENSG00000168807 | CCCUGUU  |
| ENSG00000168807 | CUGGCUC  |
| ENSG00000168807 | GCAGGUU  |
| ENSG00000168807 | GGCAAGA  |
| ENSG00000168807 | GUCCAGA  |
| ENSG00000168807 | GUGUGGC  |
| ENSG00000168807 | UCCCUGU  |
| ENSG00000168807 | UGCAUAG  |
| ENSG00000168807 | UGCAUAU  |

|                 |         |
|-----------------|---------|
| ENSG00000168807 | UGCAUUG |
| ENSG00000168807 | UGCCUG  |
| ENSG00000168807 | UGUGUGG |
| ENSG00000168807 | UUUCAAC |
| ENSG00000168813 | AACAAAC |
| ENSG00000168813 | AACAUUC |
| ENSG00000168813 | AAGGCAC |
| ENSG00000168813 | AAGUCAC |
| ENSG00000168813 | ACAGUAC |
| ENSG00000168813 | ACCUGGA |
| ENSG00000168813 | AGCAAAA |
| ENSG00000168813 | AGCCUGC |
| ENSG00000168813 | AGGUAGU |
| ENSG00000168813 | CCUGUAC |
| ENSG00000168813 | GAAAACA |
| ENSG00000168813 | GAUCAGA |
| ENSG00000168813 | GUAAACA |
| ENSG00000168813 | GUCAGUU |
| ENSG00000168813 | UGCAGCU |
| ENSG00000168813 | UGUCUUU |
| ENSG00000168830 | GAGGUAG |
| ENSG00000168843 | AAGGCAC |
| ENSG00000168872 | GAGGUAU |
| ENSG00000168872 | UCAUUUG |
| ENSG00000168872 | UUUGCAC |
| ENSG00000168874 | ACUGGCC |
| ENSG00000168874 | AGGGAGG |
| ENSG00000168874 | CCCUGG  |
| ENSG00000168874 | CCUGAG  |
| ENSG00000168874 | CUGCCC  |
| ENSG00000168874 | CUUUGGU |
| ENSG00000168874 | GAGGCUG |
| ENSG00000168874 | GCCUGGG |
| ENSG00000168874 | UGAAGCU |
| ENSG00000168874 | UUCUGCA |
| ENSG00000168874 | UUGGCAA |
| ENSG00000168874 | UUGGCAC |
| ENSG00000168876 | GAGGUAG |
| ENSG00000168876 | GGAGGCA |
| ENSG00000168876 | GUGAGGU |
| ENSG00000168876 | UCACACA |
| ENSG00000168876 | UUGACAC |
| ENSG00000168887 | GCUGGAU |
| ENSG00000168887 | GUGAGGU |
| ENSG00000168887 | UCCUGAG |
| ENSG00000168899 | UCUGGAG |
| ENSG00000168904 | UCCUGAG |
| ENSG00000168906 | AAAGCUG |
| ENSG00000168906 | AAGUGUG |
| ENSG00000168906 | AGCUGCC |
| ENSG00000168906 | AGGACAC |
| ENSG00000168906 | AGUGUGC |
| ENSG00000168906 | GGCAUUG |
| ENSG00000168906 | UCACAUU |
| ENSG00000168906 | UGCAUAG |
| ENSG00000168907 | AAGUGUG |
| ENSG00000168907 | CCUUCUG |
| ENSG00000168916 | AAGCGCU |
| ENSG00000168916 | AAUUAUU |
| ENSG00000168916 | AUGCCUU |
| ENSG00000168916 | AUGUCUG |
| ENSG00000168916 | CAGCAGA |
| ENSG00000168916 | UACAAAG |
| ENSG00000168916 | UGAAAUG |

|                 |         |
|-----------------|---------|
| ENSG00000168916 | UGAUCCA |
| ENSG00000168916 | UGGAUAA |
| ENSG00000168916 | UUUUUGC |
| ENSG00000168918 | UAAUGCU |
| ENSG00000168924 | AUGAUGA |
| ENSG00000168924 | GGAAUGU |
| ENSG00000168936 | AACACUG |
| ENSG00000168936 | AGUAACA |
| ENSG00000168936 | CAGGUGA |
| ENSG00000168936 | CCAGGAG |
| ENSG00000168936 | CUGGACU |
| ENSG00000168936 | GAGGCAG |
| ENSG00000168936 | GCAGAAG |
| ENSG00000168936 | GCAGGUU |
| ENSG00000168936 | GGCAGGG |
| ENSG00000168936 | UCACCAC |
| ENSG00000168938 | AAAGUAU |
| ENSG00000168939 | AAAGUUU |
| ENSG00000168939 | AAGUGUG |
| ENSG00000168939 | ACUCAGC |
| ENSG00000168939 | ACUUGGA |
| ENSG00000168939 | AGAUGUG |
| ENSG00000168939 | AGCAAAA |
| ENSG00000168939 | AGCAGCA |
| ENSG00000168939 | AGCCUGC |
| ENSG00000168939 | AGGAGCU |
| ENSG00000168939 | AGUGAUC |
| ENSG00000168939 | AUACAAG |
| ENSG00000168939 | AUCCUUU |
| ENSG00000168939 | AUGAGCU |
| ENSG00000168939 | AUGGCAC |
| ENSG00000168939 | CAAAGCA |
| ENSG00000168939 | CAGACAG |
| ENSG00000168939 | CAGCAAA |
| ENSG00000168939 | CAGGCUC |
| ENSG00000168939 | CAGUAGA |
| ENSG00000168939 | GAGAUGA |
| ENSG00000168939 | GCACCAU |
| ENSG00000168939 | GCAGCAU |
| ENSG00000168939 | GCCUGAU |
| ENSG00000168939 | GGACUGC |
| ENSG00000168939 | GGCAGUG |
| ENSG00000168939 | GGGGAGC |
| ENSG00000168939 | GGGUUUA |
| ENSG00000168939 | GUCUGCC |
| ENSG00000168939 | GUGACAG |
| ENSG00000168939 | GUGCAAA |
| ENSG00000168939 | UGCAGCU |
| ENSG00000168939 | UUCAAGC |
| ENSG00000168958 | UUUGCAA |
| ENSG00000168959 | CAAAGCA |
| ENSG00000168959 | UUGGCAA |
| ENSG00000168993 | AAUCACU |
| ENSG00000168993 | AUUGCAC |
| ENSG00000168993 | GAAAACA |
| ENSG00000168993 | GCAGGAC |
| ENSG00000168993 | UCAACAG |
| ENSG00000168993 | UGGCUGC |
| ENSG00000168994 | ACAUUAC |
| ENSG00000168994 | AGCAAAA |
| ENSG00000168994 | CAGUCCA |
| ENSG00000168994 | CCUUCUG |
| ENSG00000168994 | UCUCAAG |
| ENSG00000169016 | AAGGCAC |

|                 |         |
|-----------------|---------|
| ENSG00000169016 | CACAGUG |
| ENSG00000169016 | GAGGUAG |
| ENSG00000169016 | GAGUAU  |
| ENSG00000169016 | GGAGAGA |
| ENSG00000169016 | UCACAGU |
| ENSG00000169016 | UUCUAAU |
| ENSG00000169031 | AUGCACC |
| ENSG00000169031 | UAAGACG |
| ENSG00000169031 | UAAGACU |
| ENSG00000169031 | UCUGGAA |
| ENSG00000169032 | AGCAGCG |
| ENSG00000169032 | AGCAGCU |
| ENSG00000169032 | AGUAGAC |
| ENSG00000169032 | CAGCAA  |
| ENSG00000169032 | CAGUAGA |
| ENSG00000169032 | CUAUACA |
| ENSG00000169032 | GGCUCUG |
| ENSG00000169032 | UUGGCAC |
| ENSG00000169035 | AAAGGUA |
| ENSG00000169045 | AGCUGCC |
| ENSG00000169045 | UACAAAG |
| ENSG00000169045 | UCACAAG |
| ENSG00000169047 | AACAAAC |
| ENSG00000169047 | AGAUGUG |
| ENSG00000169047 | AGCAGCA |
| ENSG00000169047 | AUACCUC |
| ENSG00000169047 | AUCGUAC |
| ENSG00000169047 | CAAAACU |
| ENSG00000169047 | UACAAAG |
| ENSG00000169047 | UCACAGU |
| ENSG00000169047 | UCCUGAG |
| ENSG00000169047 | UGCUGAC |
| ENSG00000169047 | UUGGCAC |
| ENSG00000169057 | AAAGUAC |
| ENSG00000169057 | AAAGUAU |
| ENSG00000169057 | AAAGUGC |
| ENSG00000169057 | AAAUGGU |
| ENSG00000169057 | AAAUUUC |
| ENSG00000169057 | AACACUG |
| ENSG00000169057 | AACAGUC |
| ENSG00000169057 | AACUACU |
| ENSG00000169057 | AACUCUA |
| ENSG00000169057 | AAGAACC |
| ENSG00000169057 | AAGGCAC |
| ENSG00000169057 | AAGUGCA |
| ENSG00000169057 | ACAAUAU |
| ENSG00000169057 | ACAGGUG |
| ENSG00000169057 | ACCACAG |
| ENSG00000169057 | ACCAGCA |
| ENSG00000169057 | ACCCAUU |
| ENSG00000169057 | AGAUAAA |
| ENSG00000169057 | AGCAGCU |
| ENSG00000169057 | AGCCAGU |
| ENSG00000169057 | AGCUGCC |
| ENSG00000169057 | AGGUAGU |
| ENSG00000169057 | AGGUUAU |
| ENSG00000169057 | AGUAACA |
| ENSG00000169057 | AGUGCUU |
| ENSG00000169057 | AUAUAAC |
| ENSG00000169057 | AUCACUA |
| ENSG00000169057 | AUGAUGA |
| ENSG00000169057 | AUGAUGC |
| ENSG00000169057 | AUGGCAC |
| ENSG00000169057 | CAAAACU |

|                 |         |
|-----------------|---------|
| ENSG00000169057 | CACACCU |
| ENSG00000169057 | CACUCCU |
| ENSG00000169057 | CAGCAAA |
| ENSG00000169057 | CAGCAGA |
| ENSG00000169057 | CAGGAAC |
| ENSG00000169057 | CAGUAGA |
| ENSG00000169057 | CAGUGCA |
| ENSG00000169057 | CAGUUAC |
| ENSG00000169057 | CCCACCG |
| ENSG00000169057 | CCCACCU |
| ENSG00000169057 | CCUUCAU |
| ENSG00000169057 | CUAUACA |
| ENSG00000169057 | CUCCAC  |
| ENSG00000169057 | CUCUAGC |
| ENSG00000169057 | CUCUGGG |
| ENSG00000169057 | CUGGAAA |
| ENSG00000169057 | CUGGGCA |
| ENSG00000169057 | CUUGGAG |
| ENSG00000169057 | GAAGGAA |
| ENSG00000169057 | GACUUCC |
| ENSG00000169057 | GAGGCAG |
| ENSG00000169057 | GAGGUAG |
| ENSG00000169057 | GAUUGGU |
| ENSG00000169057 | GCAGCAU |
| ENSG00000169057 | GCCUGGA |
| ENSG00000169057 | GCUGUCU |
| ENSG00000169057 | GGAAGAC |
| ENSG00000169057 | GGAGGCA |
| ENSG00000169057 | GGCAGCG |
| ENSG00000169057 | GGCAGGG |
| ENSG00000169057 | GGGAACG |
| ENSG00000169057 | GGUUUAC |
| ENSG00000169057 | GUAAACA |
| ENSG00000169057 | GUAACAG |
| ENSG00000169057 | GUCAACA |
| ENSG00000169057 | GUCUCUG |
| ENSG00000169057 | GUUCAUG |
| ENSG00000169057 | UAAGACU |
| ENSG00000169057 | UAAUGCU |
| ENSG00000169057 | UAUAAAG |
| ENSG00000169057 | UAUCAGA |
| ENSG00000169057 | UAUGGUU |
| ENSG00000169057 | UAUUGCU |
| ENSG00000169057 | UCAACAG |
| ENSG00000169057 | UCAUGAU |
| ENSG00000169057 | UCAUUUG |
| ENSG00000169057 | UCCCACC |
| ENSG00000169057 | UCCCUUU |
| ENSG00000169057 | UCCGCUC |
| ENSG00000169057 | UCCUGAG |
| ENSG00000169057 | UCUGGAG |
| ENSG00000169057 | UGAAGUG |
| ENSG00000169057 | UGACUGU |
| ENSG00000169057 | UGCAAAG |
| ENSG00000169057 | UGGCCCU |
| ENSG00000169057 | UGUCUGC |
| ENSG00000169057 | UGUGCUU |
| ENSG00000169057 | UGUGUGG |
| ENSG00000169057 | UUCAAGC |
| ENSG00000169057 | UUCUGCA |
| ENSG00000169057 | UUCUUGU |
| ENSG00000169057 | UUGACAC |
| ENSG00000169057 | UUGGCAC |
| ENSG00000169057 | UUGGUCC |

|                 |         |
|-----------------|---------|
| ENSG00000169057 | UUGUGUC |
| ENSG00000169057 | UUUGCAC |
| ENSG00000169057 | UUUUUGC |
| ENSG00000169062 | AAAGUGC |
| ENSG00000169062 | AAGUGCU |
| ENSG00000169062 | AGUGCUU |
| ENSG00000169067 | UACAAAG |
| ENSG00000169071 | AACAUUC |
| ENSG00000169071 | AAGGCAC |
| ENSG00000169071 | ACAAUUA |
| ENSG00000169071 | UCCCUUU |
| ENSG00000169083 | AAGGCAC |
| ENSG00000169083 | ACUGCAG |
| ENSG00000169083 | AGUGCAA |
| ENSG00000169083 | GCAGAAG |
| ENSG00000169085 | UGACCUA |
| ENSG00000169105 | AAAAGUA |
| ENSG00000169105 | AAGGCAC |
| ENSG00000169105 | CUUUGGU |
| ENSG00000169105 | GGGUCUU |
| ENSG00000169118 | AAAGGUA |
| ENSG00000169118 | AAAGUGC |
| ENSG00000169118 | AAGUGCA |
| ENSG00000169118 | AGCACCA |
| ENSG00000169118 | AGGAGCU |
| ENSG00000169118 | AGGGAGG |
| ENSG00000169118 | AGUAACA |
| ENSG00000169118 | AGUGCAA |
| ENSG00000169118 | AUAAUAC |
| ENSG00000169118 | AUAUAAC |
| ENSG00000169118 | AUGACAC |
| ENSG00000169118 | AUGCAUU |
| ENSG00000169118 | AUGGCAC |
| ENSG00000169118 | AUGGCUU |
| ENSG00000169118 | CACUGUU |
| ENSG00000169118 | CAGACAG |
| ENSG00000169118 | CAGGAAC |
| ENSG00000169118 | CAGUAGA |
| ENSG00000169118 | CCAGUGC |
| ENSG00000169118 | CUACAGU |
| ENSG00000169118 | CUCCAGC |
| ENSG00000169118 | CUGGGGG |
| ENSG00000169118 | CUUCUCU |
| ENSG00000169118 | CUUGUGU |
| ENSG00000169118 | GAGCUGC |
| ENSG00000169118 | GCAGGUU |
| ENSG00000169118 | GCCUGGG |
| ENSG00000169118 | GGAGGCA |
| ENSG00000169118 | GGCAGGG |
| ENSG00000169118 | GGCAGUG |
| ENSG00000169118 | GGCUCAG |
| ENSG00000169118 | GUCAGUU |
| ENSG00000169118 | GUGCAAA |
| ENSG00000169118 | UAAGACG |
| ENSG00000169118 | UAAGACU |
| ENSG00000169118 | UAUAAUA |
| ENSG00000169118 | UCACAUU |
| ENSG00000169118 | UCAUUUG |
| ENSG00000169118 | UGACAUC |
| ENSG00000169118 | UGAGGAC |
| ENSG00000169118 | UGGCUGC |
| ENSG00000169118 | UUGGUCC |
| ENSG00000169118 | UUGGUUC |
| ENSG00000169118 | UUGUGUC |

|                 |          |
|-----------------|----------|
| ENSG00000169122 | AAAGUUU  |
| ENSG00000169122 | AAGACAU  |
| ENSG00000169122 | AAGUCUU  |
| ENSG00000169122 | AGGUAGU  |
| ENSG00000169122 | AGUGCUG  |
| ENSG00000169122 | AGUGC UU |
| ENSG00000169122 | AUGGCUU  |
| ENSG00000169122 | CACCACC  |
| ENSG00000169122 | CUACAGU  |
| ENSG00000169122 | CUUACAG  |
| ENSG00000169122 | GAUAUGU  |
| ENSG00000169122 | GCACCAU  |
| ENSG00000169122 | GGCUCUG  |
| ENSG00000169122 | GUUCAUG  |
| ENSG00000169122 | UAAGACG  |
| ENSG00000169122 | UAAGACU  |
| ENSG00000169122 | UACAAAG  |
| ENSG00000169122 | UACAGUU  |
| ENSG00000169122 | UCACAAG  |
| ENSG00000169122 | UUGGCAA  |
| ENSG00000169122 | UUGGCAC  |
| ENSG00000169129 | GAGUCUU  |
| ENSG00000169129 | GAUUGUC  |
| ENSG00000169129 | UGAAAUG  |
| ENSG00000169131 | GAGGUAG  |
| ENSG00000169139 | AGUGCCU  |
| ENSG00000169139 | UAUAAAG  |
| ENSG00000169155 | AGCACCA  |
| ENSG00000169155 | UCCAGUU  |
| ENSG00000169155 | UGCCAGC  |
| ENSG00000169174 | UACAAAG  |
| ENSG00000169180 | AAUCUCU  |
| ENSG00000169180 | AUGAUGA  |
| ENSG00000169180 | GAAAACA  |
| ENSG00000169180 | GAGAAAU  |
| ENSG00000169181 | GGCCUG   |
| ENSG00000169181 | GUGCCUG  |
| ENSG00000169181 | UAAUACA  |
| ENSG00000169181 | UGGCCCU  |
| ENSG00000169184 | ACUGUGU  |
| ENSG00000169184 | AUCCUUU  |
| ENSG00000169184 | CAAAGCA  |
| ENSG00000169184 | CACACCU  |
| ENSG00000169184 | CACAGUG  |
| ENSG00000169184 | CAGCAGA  |
| ENSG00000169184 | CCAGUGU  |
| ENSG00000169184 | CUCAAC   |
| ENSG00000169184 | GGCCUG   |
| ENSG00000169184 | GUGCAA   |
| ENSG00000169184 | GUGGCC   |
| ENSG00000169184 | GUGGGGA  |
| ENSG00000169184 | UCACAGU  |
| ENSG00000169184 | UCAUGAU  |
| ENSG00000169184 | UGGCCCU  |
| ENSG00000169184 | UGUCUUU  |
| ENSG00000169184 | UUGAGGC  |
| ENSG00000169193 | CUUUGGU  |
| ENSG00000169193 | GUGCAA   |
| ENSG00000169194 | AACUCUA  |
| ENSG00000169194 | AGUGCUG  |
| ENSG00000169194 | AUAUUAU  |
| ENSG00000169194 | GAGGUAG  |
| ENSG00000169194 | GAGGUAU  |
| ENSG00000169194 | GUGAGGU  |



|                 |         |
|-----------------|---------|
| ENSG00000169213 | ACUCAGC |
| ENSG00000169213 | GCCCUGU |
| ENSG00000169213 | GGCCUG  |
| ENSG00000169218 | AUAAAGU |
| ENSG00000169218 | CCUGCUG |
| ENSG00000169218 | UCCAGUU |
| ENSG00000169218 | UCUCCAA |
| ENSG00000169218 | UGAAAUG |
| ENSG00000169220 | AGCUGCC |
| ENSG00000169220 | AUAAUAC |
| ENSG00000169220 | CAGACAG |
| ENSG00000169220 | CUGCCCC |
| ENSG00000169220 | GAGGGGC |
| ENSG00000169220 | UCAUACA |
| ENSG00000169221 | AAAGCGC |
| ENSG00000169221 | GCAGGUU |
| ENSG00000169223 | AGCAAAA |
| ENSG00000169223 | CCAGUGU |
| ENSG00000169223 | CUGGGCA |
| ENSG00000169223 | GGCAAGA |
| ENSG00000169223 | UCACAUU |
| ENSG00000169228 | AGGCAGG |
| ENSG00000169228 | CACAGUG |
| ENSG00000169228 | CAGCAGG |
| ENSG00000169228 | CAGUGCA |
| ENSG00000169228 | GCCUGGG |
| ENSG00000169230 | AGCUGCC |
| ENSG00000169239 | AAUUGCU |
| ENSG00000169239 | ACAUUCA |
| ENSG00000169239 | UAUAUGA |
| ENSG00000169239 | UGUAUAA |
| ENSG00000169242 | CCUGCUG |
| ENSG00000169242 | CUUUGGU |
| ENSG00000169242 | GGCCUG  |
| ENSG00000169242 | UCCAGUU |
| ENSG00000169245 | AGCAGCA |
| ENSG00000169245 | AGCAGCG |
| ENSG00000169247 | AAAUCCC |
| ENSG00000169247 | AACUCUA |
| ENSG00000169247 | CAGUGCA |
| ENSG00000169247 | CAGUUAC |
| ENSG00000169247 | CCAGUGC |
| ENSG00000169247 | CUCAGGG |
| ENSG00000169247 | CUCCAC  |
| ENSG00000169247 | CUCUGGG |
| ENSG00000169247 | GACCUGG |
| ENSG00000169247 | GAGAACU |
| ENSG00000169247 | GAGGCAG |
| ENSG00000169247 | GCUGGUG |
| ENSG00000169247 | GGCUCUG |
| ENSG00000169247 | GGUCUAG |
| ENSG00000169247 | GUCUUGC |
| ENSG00000169247 | UAAGACU |
| ENSG00000169247 | UCUAGAG |
| ENSG00000169247 | UGAAAGG |
| ENSG00000169252 | AAUACUG |
| ENSG00000169252 | ACUGUAG |
| ENSG00000169252 | GAGGUAU |
| ENSG00000169252 | GUAAACA |
| ENSG00000169252 | UAGACUG |
| ENSG00000169255 | AAUACUG |
| ENSG00000169255 | CUGGAAA |
| ENSG00000169255 | UAUUACC |
| ENSG00000169258 | AGCCUGC |

|                 |          |
|-----------------|----------|
| ENSG00000169258 | CUCAGGG  |
| ENSG00000169258 | UCACAAG  |
| ENSG00000169282 | AGAUGUG  |
| ENSG00000169282 | AGCAGCA  |
| ENSG00000169282 | AUGCAUU  |
| ENSG00000169282 | AUGGAUU  |
| ENSG00000169282 | CACAGUG  |
| ENSG00000169282 | CAGCAGA  |
| ENSG00000169282 | GAAGGUC  |
| ENSG00000169282 | GCAGGUU  |
| ENSG00000169282 | GGCAGGG  |
| ENSG00000169282 | UCUCAAG  |
| ENSG00000169282 | UGCAUUG  |
| ENSG00000169282 | UUGUUCG  |
| ENSG00000169291 | ACAUUCA  |
| ENSG00000169291 | CACAGUG  |
| ENSG00000169291 | CAGCUGG  |
| ENSG00000169291 | CCUGCUG  |
| ENSG00000169291 | CUCACAC  |
| ENSG00000169291 | GGAAGCC  |
| ENSG00000169291 | GUGCCAC  |
| ENSG00000169291 | GUGUCAC  |
| ENSG00000169291 | UCACACA  |
| ENSG00000169291 | UCACAGG  |
| ENSG00000169291 | UCUCACC  |
| ENSG00000169291 | UGUGUCA  |
| ENSG00000169291 | UUCAAGC  |
| ENSG00000169299 | UUCCUAG  |
| ENSG00000169306 | ACCCUGU  |
| ENSG00000169306 | AGCAAAA  |
| ENSG00000169306 | AGCAGCA  |
| ENSG00000169306 | AUGUAAU  |
| ENSG00000169306 | CCCUGUU  |
| ENSG00000169306 | CGAGGAC  |
| ENSG00000169306 | CGAGGAG  |
| ENSG00000169306 | CUACAAA  |
| ENSG00000169306 | GCUACAU  |
| ENSG00000169314 | CUGGCUC  |
| ENSG00000169314 | GCAACUU  |
| ENSG00000169330 | AAAUCCC  |
| ENSG00000169330 | ACAAUUAU |
| ENSG00000169330 | AGUGUGC  |
| ENSG00000169330 | GAGUGUG  |
| ENSG00000169330 | GCACCAU  |
| ENSG00000169330 | GGAGAGA  |
| ENSG00000169330 | GGCAGUG  |
| ENSG00000169330 | GUAAACA  |
| ENSG00000169330 | GUGCUUG  |
| ENSG00000169330 | UAUUGCU  |
| ENSG00000169330 | UCCAGAG  |
| ENSG00000169330 | UGCAUUG  |
| ENSG00000169330 | UGGAGAU  |
| ENSG00000169330 | UUGGUCC  |
| ENSG00000169359 | GGCAUUG  |
| ENSG00000169359 | UUGGCAA  |
| ENSG00000169359 | UUGGCAC  |
| ENSG00000169375 | AAAGCUG  |
| ENSG00000169375 | CUAGUAA  |
| ENSG00000169375 | CUUUGGU  |
| ENSG00000169375 | UCCCUUU  |
| ENSG00000169398 | AAAACUG  |
| ENSG00000169398 | CAAAGCA  |
| ENSG00000169398 | CUACAAA  |
| ENSG00000169398 | UAAUAGU  |

|                 |         |
|-----------------|---------|
| ENSG00000169398 | UAUAAAG |
| ENSG00000169410 | ACACACC |
| ENSG00000169410 | ACACACU |
| ENSG00000169410 | ACAGUAC |
| ENSG00000169410 | AGCUGCC |
| ENSG00000169410 | CAAAACU |
| ENSG00000169410 | CACAGUG |
| ENSG00000169410 | GGCUCUG |
| ENSG00000169410 | GUGCUUG |
| ENSG00000169410 | UACAGUU |
| ENSG00000169410 | UAUUACC |
| ENSG00000169410 | UGGCCCU |
| ENSG00000169410 | UUGGCAC |
| ENSG00000169410 | UUGGUUC |
| ENSG00000169429 | AAGUGCU |
| ENSG00000169429 | AGUGCUU |
| ENSG00000169432 | AACACUG |
| ENSG00000169432 | ACUGCAG |
| ENSG00000169432 | ACUGUGU |
| ENSG00000169432 | CUGCUCA |
| ENSG00000169432 | GAAAACA |
| ENSG00000169432 | UUGGCAA |
| ENSG00000169432 | UUGGCAC |
| ENSG00000169436 | AAAGAGG |
| ENSG00000169436 | CUGUUGA |
| ENSG00000169436 | UCAAGUA |
| ENSG00000169439 | AAUACUG |
| ENSG00000169439 | ACAUAGA |
| ENSG00000169439 | AGUGAUC |
| ENSG00000169439 | AUGCAUU |
| ENSG00000169439 | AUUGCAC |
| ENSG00000169439 | CAAAGUG |
| ENSG00000169439 | GCAACUU |
| ENSG00000169439 | UAAGACU |
| ENSG00000169439 | UGUGCUU |
| ENSG00000169439 | UUCAAAU |
| ENSG00000169442 | CAGCUGG |
| ENSG00000169490 | GAGAUGA |
| ENSG00000169499 | AAUCUCU |
| ENSG00000169499 | ACUCAGC |
| ENSG00000169499 | AUGGCUU |
| ENSG00000169499 | UACAAAG |
| ENSG00000169499 | UAUUACC |
| ENSG00000169499 | UCCAGAG |
| ENSG00000169499 | UGAGAAG |
| ENSG00000169504 | AAAUGGU |
| ENSG00000169504 | CUCUUCC |
| ENSG00000169504 | CUUCUCU |
| ENSG00000169509 | AAGUGCA |
| ENSG00000169509 | GAGGUAG |
| ENSG00000169519 | AAAGAAU |
| ENSG00000169554 | AAAAGUA |
| ENSG00000169554 | AAAUCCC |
| ENSG00000169554 | AAUGUUG |
| ENSG00000169554 | ACAAGGU |
| ENSG00000169554 | ACAGUAC |
| ENSG00000169554 | ACGUCAU |
| ENSG00000169554 | ACUGGAU |
| ENSG00000169554 | ACUGUAG |
| ENSG00000169554 | AGUAGUU |
| ENSG00000169554 | AGUGAUC |
| ENSG00000169554 | AUGGCAC |
| ENSG00000169554 | AUGUAAU |
| ENSG00000169554 | AUUGCAC |

|                 |          |
|-----------------|----------|
| ENSG00000169554 | CACAAUG  |
| ENSG00000169554 | CAGGAAC  |
| ENSG00000169554 | CAGUAGU  |
| ENSG00000169554 | CAUGGGU  |
| ENSG00000169554 | CCAGUAC  |
| ENSG00000169554 | CGUGCAU  |
| ENSG00000169554 | GCAGAAG  |
| ENSG00000169554 | GCUACAU  |
| ENSG00000169554 | GCUGGUG  |
| ENSG00000169554 | GCUUCCU  |
| ENSG00000169554 | GGAAGCC  |
| ENSG00000169554 | GGUUACC  |
| ENSG00000169554 | GUAAACA  |
| ENSG00000169554 | GUCUCUG  |
| ENSG00000169554 | GUGCUUG  |
| ENSG00000169554 | GUGUGGC  |
| ENSG00000169554 | UAAGACG  |
| ENSG00000169554 | UAAUAUC  |
| ENSG00000169554 | UAGGCCG  |
| ENSG00000169554 | UAUAAUA  |
| ENSG00000169554 | UCAUACA  |
| ENSG00000169554 | UCCAGUU  |
| ENSG00000169554 | UGAAGCU  |
| ENSG00000169554 | UGCAUAG  |
| ENSG00000169554 | UUCUAAU  |
| ENSG00000169554 | UUGAGGC  |
| ENSG00000169554 | UUUCAAC  |
| ENSG00000169564 | ACAUUAC  |
| ENSG00000169564 | UAUAAAAG |
| ENSG00000169570 | AGCACCA  |
| ENSG00000169594 | AUACAAG  |
| ENSG00000169594 | GAGAACU  |
| ENSG00000169604 | AAGUGUG  |
| ENSG00000169604 | ACUGGAU  |
| ENSG00000169604 | AGGGUCU  |
| ENSG00000169604 | AUAAUAC  |
| ENSG00000169604 | AUACAAG  |
| ENSG00000169604 | CAAAACU  |
| ENSG00000169604 | CAUAUUG  |
| ENSG00000169604 | GCUUCCU  |
| ENSG00000169604 | GGGGUGG  |
| ENSG00000169604 | GUGCAAA  |
| ENSG00000169604 | UAAUGCU  |
| ENSG00000169604 | UAUAAAAG |
| ENSG00000169604 | UCACACA  |
| ENSG00000169604 | UCAUUUG  |
| ENSG00000169604 | UCUAGAG  |
| ENSG00000169604 | UGCCAGC  |
| ENSG00000169635 | AAACUGU  |
| ENSG00000169635 | AACACUG  |
| ENSG00000169635 | AACAUUC  |
| ENSG00000169635 | AACCUGG  |
| ENSG00000169635 | AAGUGCA  |
| ENSG00000169635 | AAGUGCU  |
| ENSG00000169635 | ACAAUAU  |
| ENSG00000169635 | ACUGGCC  |
| ENSG00000169635 | AGAUAAA  |
| ENSG00000169635 | AGCAAAA  |
| ENSG00000169635 | AGUGCUG  |
| ENSG00000169635 | AUAUUAU  |
| ENSG00000169635 | AUGAGCU  |
| ENSG00000169635 | AUGGCUU  |
| ENSG00000169635 | AUGUAAU  |
| ENSG00000169635 | CAAGAGC  |

|                 |         |
|-----------------|---------|
| ENSG00000169635 | CACAGGG |
| ENSG00000169635 | CACUCCU |
| ENSG00000169635 | CACUGUU |
| ENSG00000169635 | CAGGAAC |
| ENSG00000169635 | CAGGCUC |
| ENSG00000169635 | CAUAUUG |
| ENSG00000169635 | CCCUGAG |
| ENSG00000169635 | CUCUGGG |
| ENSG00000169635 | CUGGGCA |
| ENSG00000169635 | CUUUGGU |
| ENSG00000169635 | GACCUGG |
| ENSG00000169635 | GAGAAAU |
| ENSG00000169635 | GAGCCCC |
| ENSG00000169635 | GAGCCCU |
| ENSG00000169635 | GAGGCUG |
| ENSG00000169635 | GAGGGGC |
| ENSG00000169635 | GAGGUAU |
| ENSG00000169635 | GGAAUGU |
| ENSG00000169635 | GGAGGAG |
| ENSG00000169635 | GGGUCC  |
| ENSG00000169635 | GGGUCUU |
| ENSG00000169635 | GGUUUAC |
| ENSG00000169635 | GUAAACA |
| ENSG00000169635 | GUCUCUG |
| ENSG00000169635 | GUGAAUG |
| ENSG00000169635 | GUGAGGU |
| ENSG00000169635 | GUGCUUG |
| ENSG00000169635 | UAAGACG |
| ENSG00000169635 | UCACAGU |
| ENSG00000169635 | UGCAGCU |
| ENSG00000169635 | UGGGUAC |
| ENSG00000169635 | UGUGCUU |
| ENSG00000169635 | UGUGUCA |
| ENSG00000169635 | UUCCAUA |
| ENSG00000169635 | UUGGUCC |
| ENSG00000169635 | UUGGUUC |
| ENSG00000169635 | UUGUGAC |
| ENSG00000169635 | UUGUGUC |
| ENSG00000169635 | UUUGCAA |
| ENSG00000169635 | UUUGCAC |
| ENSG00000169641 | AAAGUGC |
| ENSG00000169641 | AAGUGUG |
| ENSG00000169641 | ACAUUCA |
| ENSG00000169641 | AGCACCA |
| ENSG00000169641 | AGCAGCU |
| ENSG00000169641 | AGUGUGC |
| ENSG00000169641 | AUGCACC |
| ENSG00000169641 | AUUGCAC |
| ENSG00000169641 | CAGCAGG |
| ENSG00000169641 | CCCUGAG |
| ENSG00000169641 | CUUGGAG |
| ENSG00000169641 | GAGCCCU |
| ENSG00000169641 | GAGCUGC |
| ENSG00000169641 | GGCAGGG |
| ENSG00000169641 | GGGAGCU |
| ENSG00000169641 | GGUUACC |
| ENSG00000169641 | GUGCAAA |
| ENSG00000169641 | GUGUGGC |
| ENSG00000169641 | UAUUGCU |
| ENSG00000169641 | UGCCAGC |
| ENSG00000169641 | UUGGCAA |
| ENSG00000169641 | UUGGCAC |
| ENSG00000169682 | AAUUUUA |
| ENSG00000169682 | AGCACCA |

|                 |          |
|-----------------|----------|
| ENSG00000169682 | GGGAGCU  |
| ENSG00000169682 | GUAGUGU  |
| ENSG00000169689 | GAGAACC  |
| ENSG00000169689 | GAGAACU  |
| ENSG00000169689 | UUGUGAC  |
| ENSG00000169710 | CCCACCG  |
| ENSG00000169710 | CUUCACC  |
| ENSG00000169714 | AAAGCUG  |
| ENSG00000169714 | ACUGGCC  |
| ENSG00000169714 | AUAAUAC  |
| ENSG00000169714 | AUGCAUU  |
| ENSG00000169714 | CAAAGCA  |
| ENSG00000169714 | CACCAGC  |
| ENSG00000169714 | CUCCAGC  |
| ENSG00000169714 | CUCUCC   |
| ENSG00000169714 | GAGGGGC  |
| ENSG00000169714 | GCAGAAG  |
| ENSG00000169714 | GCCUGAU  |
| ENSG00000169714 | GCCUGGG  |
| ENSG00000169714 | GGCGACA  |
| ENSG00000169714 | UAAUACA  |
| ENSG00000169714 | UCACCAC  |
| ENSG00000169714 | UGGCCAC  |
| ENSG00000169714 | UUCCUCG  |
| ENSG00000169714 | UUUUUGC  |
| ENSG00000169718 | GCAGCAU  |
| ENSG00000169718 | UCCUGU   |
| ENSG00000169744 | AUGGCUU  |
| ENSG00000169750 | GACCCUG  |
| ENSG00000169756 | UGCAUUAU |
| ENSG00000169758 | AAAAAUC  |
| ENSG00000169758 | AGUGCUG  |
| ENSG00000169758 | CACAGUG  |
| ENSG00000169758 | CAGCUGG  |
| ENSG00000169758 | CAGUGCA  |
| ENSG00000169758 | CCUGCUG  |
| ENSG00000169758 | CUGCUC   |
| ENSG00000169758 | GGAGGCA  |
| ENSG00000169758 | UCACAGU  |
| ENSG00000169758 | UGAAGCU  |
| ENSG00000169758 | UGCAGCU  |
| ENSG00000169758 | UGCUCAC  |
| ENSG00000169760 | AAAAGUA  |
| ENSG00000169760 | AGCAGCA  |
| ENSG00000169760 | AGCAUUC  |
| ENSG00000169760 | CAGCAGA  |
| ENSG00000169760 | CAGCAGG  |
| ENSG00000169760 | GGAUGAG  |
| ENSG00000169760 | UACAAAG  |
| ENSG00000169760 | UCCCUUG  |
| ENSG00000169760 | UGAGAAG  |
| ENSG00000169760 | UGCAUUAU |
| ENSG00000169760 | UUGUGUC  |
| ENSG00000169762 | AAAGUGC  |
| ENSG00000169762 | AACACUG  |
| ENSG00000169762 | AAGUGCA  |
| ENSG00000169762 | CACAGUG  |
| ENSG00000169762 | CUCCAA   |
| ENSG00000169762 | GGUGGUC  |
| ENSG00000169762 | GGUGGUU  |
| ENSG00000169762 | UAUAAAG  |
| ENSG00000169762 | UCACAGG  |
| ENSG00000169762 | UCUGGAG  |
| ENSG00000169762 | UGCAAAG  |

|                 |         |
|-----------------|---------|
| ENSG00000169762 | UUGGCAC |
| ENSG00000169764 | UAUUGCU |
| ENSG00000169783 | AGGCAGG |
| ENSG00000169783 | CAGUCUG |
| ENSG00000169783 | CUGCCCC |
| ENSG00000169783 | GAGAAGA |
| ENSG00000169783 | GAGGUAG |
| ENSG00000169783 | GAGGUAU |
| ENSG00000169783 | GCCCUGU |
| ENSG00000169783 | GGGGUCC |
| ENSG00000169783 | GUGAGGU |
| ENSG00000169783 | UCAAGUA |
| ENSG00000169783 | UCCUGAG |
| ENSG00000169783 | UGCAUUG |
| ENSG00000169783 | UUCAAGC |
| ENSG00000169813 | AAUUUUA |
| ENSG00000169813 | ACUCAA  |
| ENSG00000169813 | AGCACCA |
| ENSG00000169813 | CACAGUG |
| ENSG00000169813 | CUACAGU |
| ENSG00000169813 | GUCAUUG |
| ENSG00000169813 | GUGCAA  |
| ENSG00000169813 | UACAAAG |
| ENSG00000169813 | UGAGAAG |
| ENSG00000169813 | UGAGAAU |
| ENSG00000169826 | AAAGAGG |
| ENSG00000169826 | ACUGCAU |
| ENSG00000169826 | AGCACCA |
| ENSG00000169826 | AGUGCUU |
| ENSG00000169851 | AAGGCAC |
| ENSG00000169851 | AAGUGCU |
| ENSG00000169851 | ACCACAG |
| ENSG00000169851 | ACUCAGG |
| ENSG00000169851 | AGUGCUU |
| ENSG00000169851 | AUACAAG |
| ENSG00000169851 | AUCGUAC |
| ENSG00000169851 | CAGCAGG |
| ENSG00000169851 | CGUACCG |
| ENSG00000169851 | CGUGCAU |
| ENSG00000169851 | GAGGCAG |
| ENSG00000169851 | GCAGAAG |
| ENSG00000169851 | GCCUGAU |
| ENSG00000169851 | GGCAGGG |
| ENSG00000169851 | GUCUCUG |
| ENSG00000169851 | UAAGACU |
| ENSG00000169851 | UACAAAG |
| ENSG00000169851 | UGCAUAG |
| ENSG00000169851 | UGCAUUG |
| ENSG00000169855 | AGUGAUC |
| ENSG00000169855 | AUUGCAC |
| ENSG00000169855 | CAUGGAU |
| ENSG00000169855 | GAGAACC |
| ENSG00000169855 | GAGAACU |
| ENSG00000169855 | GAUUGUA |
| ENSG00000169855 | GAUUGUC |
| ENSG00000169855 | GUGCUUG |
| ENSG00000169855 | UAGUGAG |
| ENSG00000169855 | UGAGAAG |
| ENSG00000169855 | UGAGAAU |
| ENSG00000169856 | AAAGCUG |
| ENSG00000169856 | CAGGUGA |
| ENSG00000169856 | UUGGUUC |
| ENSG00000169860 | AGAUGUG |
| ENSG00000169862 | AAAAAUC |

|                 |         |
|-----------------|---------|
| ENSG00000169862 | AAAGAAU |
| ENSG00000169862 | AAAUUUC |
| ENSG00000169862 | AACUGGU |
| ENSG00000169862 | AAUACUG |
| ENSG00000169862 | AAUUUUA |
| ENSG00000169862 | ACAUCAC |
| ENSG00000169862 | AGGCAGG |
| ENSG00000169862 | AUGCAUU |
| ENSG00000169862 | AUGCCUU |
| ENSG00000169862 | AUGGAUU |
| ENSG00000169862 | CUGGAAA |
| ENSG00000169862 | GAAACAU |
| ENSG00000169862 | GAGAAGA |
| ENSG00000169862 | GAGUGUG |
| ENSG00000169862 | GGAGUGU |
| ENSG00000169862 | GGAUGAG |
| ENSG00000169862 | GGCAAGA |
| ENSG00000169862 | GGCAUUG |
| ENSG00000169862 | GUGCUUG |
| ENSG00000169862 | UAUCAGA |
| ENSG00000169862 | UGAGAAG |
| ENSG00000169862 | UGUUGAA |
| ENSG00000169871 | UUGGUCC |
| ENSG00000169884 | CAGUGCA |
| ENSG00000169884 | UUGGAGG |
| ENSG00000169891 | AAAGAGG |
| ENSG00000169891 | AGCACCA |
| ENSG00000169891 | AUGCAUU |
| ENSG00000169891 | CAGUAGU |
| ENSG00000169891 | CUCCCAA |
| ENSG00000169891 | CUGCUCA |
| ENSG00000169891 | CUUCACC |
| ENSG00000169891 | GAGGCAG |
| ENSG00000169891 | GAUUGUC |
| ENSG00000169891 | GGUGGUU |
| ENSG00000169891 | GUCUUGC |
| ENSG00000169891 | GUGAGGU |
| ENSG00000169891 | UAAUGCU |
| ENSG00000169891 | UCACAGG |
| ENSG00000169891 | UCACAGU |
| ENSG00000169891 | UCAUACA |
| ENSG00000169891 | UGAAAGG |
| ENSG00000169891 | UUGGCAA |
| ENSG00000169891 | UUGGCAC |
| ENSG00000169895 | CCUUCUG |
| ENSG00000169895 | UUGGUCC |
| ENSG00000169896 | GCCUGGG |
| ENSG00000169908 | AAAGUUU |
| ENSG00000169908 | GAAACAU |
| ENSG00000169914 | AAAGUGC |
| ENSG00000169914 | AACACUG |
| ENSG00000169914 | AAGGCAC |
| ENSG00000169914 | AAGUCUU |
| ENSG00000169914 | ACAGUAU |
| ENSG00000169914 | AGCAAAA |
| ENSG00000169914 | AUAAAGU |
| ENSG00000169914 | AUACAAG |
| ENSG00000169914 | AUGGCUU |
| ENSG00000169914 | GAGAAAU |
| ENSG00000169914 | GAGGUAG |
| ENSG00000169914 | GAGGUAU |
| ENSG00000169914 | GAGUUGA |
| ENSG00000169914 | GAUUGUC |
| ENSG00000169914 | GCACCAU |



|                 |         |
|-----------------|---------|
| ENSG00000169914 | GCUGGUG |
| ENSG00000169914 | GGCAAGA |
| ENSG00000169914 | UAAUACA |
| ENSG00000169914 | UGAAGCU |
| ENSG00000169914 | UUGGUUC |
| ENSG00000169918 | GCACCAU |
| ENSG00000169925 | AGGAGCU |
| ENSG00000169925 | GAGGUAG |
| ENSG00000169925 | GAGGUAU |
| ENSG00000169925 | GGAAGAC |
| ENSG00000169925 | UGACCUA |
| ENSG00000169926 | AAAAGUA |
| ENSG00000169926 | AAAUGGU |
| ENSG00000169926 | AAAUUUC |
| ENSG00000169926 | AACAAAC |
| ENSG00000169926 | AACCUGG |
| ENSG00000169926 | AAGGCAC |
| ENSG00000169926 | AAGGCGC |
| ENSG00000169926 | AAGUGCA |
| ENSG00000169926 | AAGUGCU |
| ENSG00000169926 | AAUACUG |
| ENSG00000169926 | AAUCUCA |
| ENSG00000169926 | ACACACU |
| ENSG00000169926 | ACCUGGA |
| ENSG00000169926 | ACUGUAG |
| ENSG00000169926 | AGGACAC |
| ENSG00000169926 | AGUGCAA |
| ENSG00000169926 | AUGGCUU |
| ENSG00000169926 | CACAAUG |
| ENSG00000169926 | CACUGUU |
| ENSG00000169926 | CUUUGGU |
| ENSG00000169926 | GACCCUG |
| ENSG00000169926 | GAGAAAU |
| ENSG00000169926 | GAGAUGA |
| ENSG00000169926 | GAGUGUG |
| ENSG00000169926 | GCCUGGA |
| ENSG00000169926 | GCCUGGG |
| ENSG00000169926 | GGAAUGU |
| ENSG00000169926 | GGCAAGA |
| ENSG00000169926 | GUAAACA |
| ENSG00000169926 | GUAGUGU |
| ENSG00000169926 | GUGAAUG |
| ENSG00000169926 | GUGUGGC |
| ENSG00000169926 | UCAUGAU |
| ENSG00000169926 | UCCUCU  |
| ENSG00000169926 | UCCUAUA |
| ENSG00000169926 | UCCUGAG |
| ENSG00000169926 | UGAUCCA |
| ENSG00000169926 | UGCAUUA |
| ENSG00000169926 | UGGCCAC |
| ENSG00000169926 | UUCAAAU |
| ENSG00000169926 | UUGGCAC |
| ENSG00000169926 | UUUGCAA |
| ENSG00000169926 | UUUGCAC |
| ENSG00000169933 | AAAGGUA |
| ENSG00000169933 | AGUGUGC |
| ENSG00000169933 | CAGGCUC |
| ENSG00000169933 | CUGGACU |
| ENSG00000169933 | GGCUCUG |
| ENSG00000169933 | GGUGGUU |
| ENSG00000169933 | GUGAAUG |
| ENSG00000169933 | GUGCUUG |
| ENSG00000169933 | UGAAAGG |
| ENSG00000169933 | UGUGCUU |

|                 |          |
|-----------------|----------|
| ENSG00000169933 | UUGGCAC  |
| ENSG00000169933 | UUUGCAA  |
| ENSG00000169946 | AAAGUAA  |
| ENSG00000169946 | AAAGUAC  |
| ENSG00000169946 | AACAUUC  |
| ENSG00000169946 | AAGUGCA  |
| ENSG00000169946 | AAGUGCU  |
| ENSG00000169946 | ACUCAGC  |
| ENSG00000169946 | AGAUAAA  |
| ENSG00000169946 | AGUGCUU  |
| ENSG00000169946 | AUAAUAC  |
| ENSG00000169946 | AUGUGCC  |
| ENSG00000169946 | AUUGCAC  |
| ENSG00000169946 | CAA AUGC |
| ENSG00000169946 | CACCAGC  |
| ENSG00000169946 | CAGCAA   |
| ENSG00000169946 | CAGUGCA  |
| ENSG00000169946 | GCUGGUG  |
| ENSG00000169946 | GCUUCCU  |
| ENSG00000169946 | UAAUAUC  |
| ENSG00000169946 | UACAAAG  |
| ENSG00000169946 | UAUCAGA  |
| ENSG00000169946 | UAUUGCU  |
| ENSG00000169946 | UCAUUUG  |
| ENSG00000169946 | UGAGAAG  |
| ENSG00000169946 | UGAGAAU  |
| ENSG00000169946 | UGCAAAG  |
| ENSG00000169946 | UGCAGCU  |
| ENSG00000169946 | UGCAUUG  |
| ENSG00000169946 | UGUUGAA  |
| ENSG00000169955 | CUCUCC   |
| ENSG00000169955 | GAGCGCC  |
| ENSG00000169955 | GGAAGCC  |
| ENSG00000169967 | AAAAAUC  |
| ENSG00000169967 | AAGUGCA  |
| ENSG00000169967 | AAGUGCU  |
| ENSG00000169967 | ACCCUGU  |
| ENSG00000169967 | ACUGGCU  |
| ENSG00000169967 | AGCAAAA  |
| ENSG00000169967 | AGUGCUU  |
| ENSG00000169967 | AUACCUC  |
| ENSG00000169967 | CAAGAGC  |
| ENSG00000169967 | GAGAAAU  |
| ENSG00000169967 | GGUUACC  |
| ENSG00000169992 | AAAAAUC  |
| ENSG00000169992 | AAGUGCU  |
| ENSG00000169992 | AGCAUUC  |
| ENSG00000169992 | AGGAGCU  |
| ENSG00000169992 | AGGCAGG  |
| ENSG00000169992 | AGGGUUG  |
| ENSG00000169992 | CAUGGGU  |
| ENSG00000169992 | CCUGCUG  |
| ENSG00000169992 | CUCUCC   |
| ENSG00000169992 | CUGGGCA  |
| ENSG00000169992 | CUGGGGG  |
| ENSG00000169992 | CUUUGGU  |
| ENSG00000169992 | GCUGGUG  |
| ENSG00000169992 | GGAAGAC  |
| ENSG00000169992 | GGAGUCC  |
| ENSG00000169992 | GGCACGG  |
| ENSG00000169992 | GGCAUUG  |
| ENSG00000169992 | GGGGUCC  |
| ENSG00000169992 | GUCUGCC  |
| ENSG00000169992 | UUGGCAA  |

|                 |         |
|-----------------|---------|
| ENSG00000170004 | AAAGUAU |
| ENSG00000170004 | CUUUGGU |
| ENSG00000170004 | GACCCUG |
| ENSG00000170004 | GGAAGAC |
| ENSG00000170004 | GGCAGCG |
| ENSG00000170004 | GUGGGGA |
| ENSG00000170004 | UAUAUGA |
| ENSG00000170006 | AGCAAAA |
| ENSG00000170006 | AGCAGCA |
| ENSG00000170006 | CUUCUCU |
| ENSG00000170006 | CUUGGAG |
| ENSG00000170006 | UUGUGUC |
| ENSG00000170011 | AAAAAUC |
| ENSG00000170011 | AACAUUC |
| ENSG00000170011 | AAGGCAC |
| ENSG00000170011 | AAUCACU |
| ENSG00000170011 | CCCCUGG |
| ENSG00000170011 | GAGGCAG |
| ENSG00000170011 | GAGGUAG |
| ENSG00000170011 | GAGUAU  |
| ENSG00000170011 | GGAGGCA |
| ENSG00000170011 | GGCAGUG |
| ENSG00000170011 | GUAACAG |
| ENSG00000170011 | UUUGCAA |
| ENSG00000170017 | AAGGUGC |
| ENSG00000170017 | ACAUAGA |
| ENSG00000170017 | AUGGCUU |
| ENSG00000170017 | CUUACAG |
| ENSG00000170017 | UACAGUU |
| ENSG00000170017 | UCUCAAG |
| ENSG00000170017 | UGACCUA |
| ENSG00000170017 | UGUAUAA |
| ENSG00000170027 | AAAGAGG |
| ENSG00000170027 | AACAGUC |
| ENSG00000170027 | AAGUGCA |
| ENSG00000170027 | ACAAUAU |
| ENSG00000170027 | ACAUUCA |
| ENSG00000170027 | ACCACAG |
| ENSG00000170027 | ACCAGCA |
| ENSG00000170027 | ACUGCAG |
| ENSG00000170027 | ACUGGAU |
| ENSG00000170027 | CCAGUAC |
| ENSG00000170027 | CCCUGAG |
| ENSG00000170027 | GGAGAGA |
| ENSG00000170027 | UCACAUU |
| ENSG00000170027 | UCCAGUU |
| ENSG00000170027 | UUGGCAC |
| ENSG00000170035 | AUAAAGU |
| ENSG00000170035 | AUAAUAC |
| ENSG00000170035 | GAGCUAA |
| ENSG00000170035 | UAUAAAG |
| ENSG00000170035 | UAUAAUA |
| ENSG00000170043 | AAAACUG |
| ENSG00000170043 | AAAGUUU |
| ENSG00000170043 | GAGGUAG |
| ENSG00000170044 | AAGUGCA |
| ENSG00000170044 | AGUGCAA |
| ENSG00000170044 | CUACAAA |
| ENSG00000170044 | GAGGUAG |
| ENSG00000170044 | UGAAGUG |
| ENSG00000170044 | UUGAGGC |
| ENSG00000170049 | CCGGAGC |
| ENSG00000170049 | GCGGGGC |
| ENSG00000170049 | GGCGGGG |

|                 |         |
|-----------------|---------|
| ENSG00000170049 | GUUCAUG |
| ENSG00000170075 | CUGGCUC |
| ENSG00000170085 | GAGGUAU |
| ENSG00000170085 | UGUAUAA |
| ENSG00000170088 | ACUGUAG |
| ENSG00000170088 | GGCAGCG |
| ENSG00000170088 | GUAAACA |
| ENSG00000170091 | AAGCGCU |
| ENSG00000170091 | ACUCCAG |
| ENSG00000170091 | AUGCCUU |
| ENSG00000170091 | CAGACAG |
| ENSG00000170091 | CCAGGAG |
| ENSG00000170091 | CUUACAG |
| ENSG00000170091 | GACAACU |
| ENSG00000170091 | UGUCUUU |
| ENSG00000170091 | UUGGCAA |
| ENSG00000170091 | UUGGCAC |
| ENSG00000170113 | AAAGCUG |
| ENSG00000170113 | AAGGCAC |
| ENSG00000170113 | CCCUGAG |
| ENSG00000170113 | CUUCUCU |
| ENSG00000170113 | GAGCUAA |
| ENSG00000170113 | GAGGCAG |
| ENSG00000170113 | GGAAGCC |
| ENSG00000170113 | GUGCAA  |
| ENSG00000170113 | GUUAAUG |
| ENSG00000170113 | UAGAGGA |
| ENSG00000170113 | UAUAAAG |
| ENSG00000170113 | UAUUGCU |
| ENSG00000170113 | UCUGGAA |
| ENSG00000170113 | UGCAUUG |
| ENSG00000170113 | UUGGCAA |
| ENSG00000170113 | UUGGUCC |
| ENSG00000170142 | AACAAAC |
| ENSG00000170142 | ACAGGUG |
| ENSG00000170142 | AGCAGCU |
| ENSG00000170142 | AGUAACA |
| ENSG00000170142 | CUCCAC  |
| ENSG00000170142 | UCCACC  |
| ENSG00000170144 | AAAAACC |
| ENSG00000170144 | AACCUGG |
| ENSG00000170144 | AACCUGU |
| ENSG00000170144 | AAGAACC |
| ENSG00000170144 | AAGACAU |
| ENSG00000170144 | ACAGUAC |
| ENSG00000170144 | ACUCAGG |
| ENSG00000170144 | ACUGCAU |
| ENSG00000170144 | AGAUAAA |
| ENSG00000170144 | AGCUGCC |
| ENSG00000170144 | AUACCUC |
| ENSG00000170144 | AUGACAC |
| ENSG00000170144 | AUGCAUU |
| ENSG00000170144 | AUGCCUU |
| ENSG00000170144 | AUGGAUU |
| ENSG00000170144 | AUGGCUU |
| ENSG00000170144 | AUGUAAU |
| ENSG00000170144 | CAAAGUG |
| ENSG00000170144 | CAGGAAC |
| ENSG00000170144 | CCUGCUG |
| ENSG00000170144 | CCUUCUU |
| ENSG00000170144 | CUCAAAC |
| ENSG00000170144 | CUGACUC |
| ENSG00000170144 | CUGCAGC |
| ENSG00000170144 | CUGGAAA |

|                 |         |
|-----------------|---------|
| ENSG00000170144 | CUUCUCU |
| ENSG00000170144 | CUUGUAU |
| ENSG00000170144 | GCAGGUU |
| ENSG00000170144 | GGCAUUG |
| ENSG00000170144 | GUCAUUG |
| ENSG00000170144 | UAUUGCU |
| ENSG00000170144 | UCCUGAG |
| ENSG00000170144 | UCCUUGC |
| ENSG00000170144 | UCUGGAA |
| ENSG00000170144 | UGAAGCU |
| ENSG00000170144 | UGAUCCA |
| ENSG00000170144 | UGCAAAG |
| ENSG00000170144 | UGCAGCU |
| ENSG00000170144 | UGCAUUG |
| ENSG00000170144 | UGCCUG  |
| ENSG00000170144 | UGCUGAC |
| ENSG00000170144 | UGGGACA |
| ENSG00000170144 | UGUGUCA |
| ENSG00000170144 | UUGACAC |
| ENSG00000170144 | UUGUGUC |
| ENSG00000170144 | UUUGCAC |
| ENSG00000170153 | AAAGCUG |
| ENSG00000170153 | AGCUGCC |
| ENSG00000170153 | GGAAGCC |
| ENSG00000170153 | UAUUGCU |
| ENSG00000170153 | UCUGGAG |
| ENSG00000170153 | UGGAUAA |
| ENSG00000170162 | UCUGGAA |
| ENSG00000170180 | AAGUCUU |
| ENSG00000170185 | AAGGCAC |
| ENSG00000170185 | ACUGCAG |
| ENSG00000170185 | ACUGCAU |
| ENSG00000170185 | AGUACUG |
| ENSG00000170185 | AUGAUGC |
| ENSG00000170185 | CCCUGAG |
| ENSG00000170191 | AGCACCA |
| ENSG00000170214 | AAAGUGC |
| ENSG00000170214 | AGCAGCU |
| ENSG00000170214 | AGCUGCC |
| ENSG00000170214 | CUGCCCC |
| ENSG00000170234 | AAAAGUA |
| ENSG00000170234 | AUUGCAC |
| ENSG00000170234 | CUCCAUU |
| ENSG00000170234 | GCACCAU |
| ENSG00000170242 | AAAGUUU |
| ENSG00000170242 | AAGGCAC |
| ENSG00000170242 | ACUGCAU |
| ENSG00000170242 | AGUGCUG |
| ENSG00000170242 | AUCCCUU |
| ENSG00000170242 | AUGAGCU |
| ENSG00000170242 | AUGGCAC |
| ENSG00000170242 | AUGUGCC |
| ENSG00000170242 | AUUCAUU |
| ENSG00000170242 | CAAAGCA |
| ENSG00000170242 | CAGUCCA |
| ENSG00000170242 | CAGUGCA |
| ENSG00000170242 | CAGUUAC |
| ENSG00000170242 | CCUGCUG |
| ENSG00000170242 | CUACAAA |
| ENSG00000170242 | GAGCUGC |
| ENSG00000170242 | GAGGCUG |
| ENSG00000170242 | GAGGUAG |
| ENSG00000170242 | GAGGUAU |
| ENSG00000170242 | GAUUGGU |

|                 |          |
|-----------------|----------|
| ENSG00000170242 | GCAGCAU  |
| ENSG00000170242 | GGUUACC  |
| ENSG00000170242 | GUAAACA  |
| ENSG00000170242 | GUUCAUG  |
| ENSG00000170242 | UACAGUU  |
| ENSG00000170242 | UAUAAAAG |
| ENSG00000170242 | UAUAAUA  |
| ENSG00000170242 | UCAUUCG  |
| ENSG00000170242 | UCUAGAG  |
| ENSG00000170248 | AAAGAAU  |
| ENSG00000170248 | AAUCUCU  |
| ENSG00000170248 | ACUGCAG  |
| ENSG00000170248 | AGCAGCA  |
| ENSG00000170248 | AUUGCAC  |
| ENSG00000170248 | CCUUCUG  |
| ENSG00000170248 | CUCUGGG  |
| ENSG00000170248 | CUGCUCU  |
| ENSG00000170248 | UAUUGCU  |
| ENSG00000170248 | UCCCUUU  |
| ENSG00000170260 | CAGCAGG  |
| ENSG00000170260 | GAGCCC   |
| ENSG00000170260 | GAGGGGC  |
| ENSG00000170260 | GGAAGAC  |
| ENSG00000170265 | AGUGCAA  |
| ENSG00000170265 | GAGGUAG  |
| ENSG00000170265 | GGCGCCU  |
| ENSG00000170266 | UGAAGUG  |
| ENSG00000170270 | UUAGGAU  |
| ENSG00000170270 | UUGACAC  |
| ENSG00000170271 | GCCUGGA  |
| ENSG00000170275 | AAAUGGU  |
| ENSG00000170275 | AAGUAGC  |
| ENSG00000170275 | AAUGUUG  |
| ENSG00000170275 | ACUGUUU  |
| ENSG00000170275 | AUAAUAC  |
| ENSG00000170275 | CAAGAGC  |
| ENSG00000170275 | CAGACAG  |
| ENSG00000170275 | CCAGGAG  |
| ENSG00000170275 | CUACAAA  |
| ENSG00000170275 | CUAGGCU  |
| ENSG00000170275 | CUCUGGG  |
| ENSG00000170275 | CUGCAGG  |
| ENSG00000170275 | GAAGGAA  |
| ENSG00000170275 | GAGGUAG  |
| ENSG00000170275 | GGGUUUA  |
| ENSG00000170275 | UCACAGG  |
| ENSG00000170275 | UCACAUU  |
| ENSG00000170275 | UCCCUUU  |
| ENSG00000170275 | UGUGCUU  |
| ENSG00000170289 | AAUUAUU  |
| ENSG00000170289 | CAGCAAA  |
| ENSG00000170289 | CUUGGAG  |
| ENSG00000170289 | GAUAUGU  |
| ENSG00000170289 | GUAAACA  |
| ENSG00000170289 | UCUCAAG  |
| ENSG00000170290 | GCAGCAU  |
| ENSG00000170296 | AUGUGCC  |
| ENSG00000170323 | CAGUCCA  |
| ENSG00000170325 | AAAGUGC  |
| ENSG00000170325 | AACACUG  |
| ENSG00000170325 | AUGAUGA  |
| ENSG00000170325 | CCUGCUG  |
| ENSG00000170325 | CUUUGGU  |
| ENSG00000170340 | GAGGUAG  |

|                 |         |
|-----------------|---------|
| ENSG00000170340 | GGCUCAG |
| ENSG00000170340 | GUGAGGU |
| ENSG00000170345 | AAAAAUC |
| ENSG00000170345 | ACAUUCA |
| ENSG00000170345 | ACUAGAU |
| ENSG00000170345 | AGCACCA |
| ENSG00000170345 | AGUAGUU |
| ENSG00000170345 | CAGUAGU |
| ENSG00000170345 | GAUCAGA |
| ENSG00000170345 | GCUACAU |
| ENSG00000170348 | AAGGCAC |
| ENSG00000170348 | AAUUUUA |
| ENSG00000170348 | CACCAGC |
| ENSG00000170348 | CAGCAGA |
| ENSG00000170348 | CAGCAGG |
| ENSG00000170348 | CUCCAC  |
| ENSG00000170348 | CUGGAAA |
| ENSG00000170348 | GAGAAAU |
| ENSG00000170348 | GCUAGCA |
| ENSG00000170348 | GGCAUUG |
| ENSG00000170348 | UACAGUU |
| ENSG00000170348 | UGAGAAG |
| ENSG00000170348 | UGAGAAU |
| ENSG00000170348 | UGCAAAG |
| ENSG00000170348 | UGUAUAA |
| ENSG00000170348 | UUCUGCA |
| ENSG00000170365 | AAAGUAA |
| ENSG00000170365 | CAGUAGA |
| ENSG00000170365 | CCUUCAU |
| ENSG00000170365 | GAGGCAG |
| ENSG00000170370 | AACAAAC |
| ENSG00000170370 | AAGACAU |
| ENSG00000170370 | AGUGCUU |
| ENSG00000170370 | CAGUGCA |
| ENSG00000170370 | CAUAUUG |
| ENSG00000170370 | GCUACAU |
| ENSG00000170370 | GUGCUUG |
| ENSG00000170374 | AAAAGUA |
| ENSG00000170374 | AAGUCAC |
| ENSG00000170374 | AAUUAUU |
| ENSG00000170374 | CCCUGAG |
| ENSG00000170374 | CUAUACA |
| ENSG00000170374 | CUGCCCC |
| ENSG00000170374 | CUGGGGG |
| ENSG00000170374 | GACCCUG |
| ENSG00000170374 | GAUCAGA |
| ENSG00000170374 | GCCUGGG |
| ENSG00000170374 | GGGGCAG |
| ENSG00000170374 | GGGGUCC |
| ENSG00000170374 | GUCUGCC |
| ENSG00000170374 | UAUUACC |
| ENSG00000170374 | UCACAGG |
| ENSG00000170374 | UCACAGU |
| ENSG00000170374 | UCCAGUU |
| ENSG00000170374 | UCCCUCU |
| ENSG00000170374 | UGGGAUC |
| ENSG00000170374 | UUGGCAC |
| ENSG00000170381 | ACCACAG |
| ENSG00000170381 | GAAGGAA |
| ENSG00000170382 | AAAGGUA |
| ENSG00000170382 | UACAAAG |
| ENSG00000170390 | AAAACUG |
| ENSG00000170390 | AAUUAUU |
| ENSG00000170390 | AUUGCAC |

|                 |          |
|-----------------|----------|
| ENSG00000170390 | UAUUGCU  |
| ENSG00000170390 | UCCAGAG  |
| ENSG00000170390 | UGCCAGC  |
| ENSG00000170412 | AACACUG  |
| ENSG00000170417 | AUGGAUU  |
| ENSG00000170417 | CUACAAA  |
| ENSG00000170417 | GGAUUUC  |
| ENSG00000170417 | UCUGGAA  |
| ENSG00000170419 | UCCGCUC  |
| ENSG00000170425 | CACAGUG  |
| ENSG00000170425 | UCACAGG  |
| ENSG00000170430 | AGGACAC  |
| ENSG00000170445 | UUUUUGC  |
| ENSG00000170448 | AGAUAAA  |
| ENSG00000170448 | AUGGCUU  |
| ENSG00000170454 | UAAUAGU  |
| ENSG00000170464 | AAAAACC  |
| ENSG00000170464 | CUGCCCC  |
| ENSG00000170464 | UAUAAAAG |
| ENSG00000170473 | AGCAGCA  |
| ENSG00000170473 | CAGGAAC  |
| ENSG00000170473 | CAGUCCA  |
| ENSG00000170473 | GAGCCCC  |
| ENSG00000170473 | UUGUUCG  |
| ENSG00000170482 | UCCCUUG  |
| ENSG00000170482 | UCCCUUU  |
| ENSG00000170485 | AAUCUCA  |
| ENSG00000170485 | CCAGUGC  |
| ENSG00000170485 | GAAACAU  |
| ENSG00000170485 | GAUUGUA  |
| ENSG00000170485 | GAUUGUC  |
| ENSG00000170485 | GUGCUUG  |
| ENSG00000170486 | UAUUGCU  |
| ENSG00000170498 | UAUUGCU  |
| ENSG00000170500 | AAGUGCU  |
| ENSG00000170500 | AAUCACU  |
| ENSG00000170500 | GAGAAAU  |
| ENSG00000170500 | GAGUAUU  |
| ENSG00000170500 | UCACAAG  |
| ENSG00000170500 | UUGACAC  |
| ENSG00000170515 | AGGCAGG  |
| ENSG00000170515 | GAGGCAG  |
| ENSG00000170515 | GGAAGCC  |
| ENSG00000170522 | AAAGCUG  |
| ENSG00000170522 | AGCCCUU  |
| ENSG00000170522 | CACAGUG  |
| ENSG00000170522 | CCCUGAG  |
| ENSG00000170523 | CUGGCUC  |
| ENSG00000170523 | GUAUUCU  |
| ENSG00000170525 | AAAGUGC  |
| ENSG00000170525 | AAGUGCA  |
| ENSG00000170525 | AGUGCAA  |
| ENSG00000170525 | AUACAAG  |
| ENSG00000170525 | CAGACAG  |
| ENSG00000170525 | GUGCAAA  |
| ENSG00000170525 | UCACACA  |
| ENSG00000170525 | UUCAAGC  |
| ENSG00000170525 | UUGGCAC  |
| ENSG00000170525 | UUGGUCC  |
| ENSG00000170537 | AGCCAGU  |
| ENSG00000170537 | GAGGUAG  |
| ENSG00000170549 | UCAUUUG  |
| ENSG00000170558 | AAAGCUG  |
| ENSG00000170558 | AAAGGUA  |



|                 |         |
|-----------------|---------|
| ENSG00000170558 | AAAUCCC |
| ENSG00000170558 | AAGAACC |
| ENSG00000170558 | AGCAUUC |
| ENSG00000170558 | AGUGCUU |
| ENSG00000170558 | AUAAUAC |
| ENSG00000170558 | AUGUAAU |
| ENSG00000170558 | CCAGUGC |
| ENSG00000170558 | CUAGUAG |
| ENSG00000170558 | GAUAUGU |
| ENSG00000170558 | GGGGUCC |
| ENSG00000170558 | GUGCCAC |
| ENSG00000170558 | UAAUACA |
| ENSG00000170558 | UACAAAG |
| ENSG00000170558 | UACAGUU |
| ENSG00000170558 | UCCAGUU |
| ENSG00000170558 | UCCCUUU |
| ENSG00000170558 | UGAAGUG |
| ENSG00000170558 | UGGUACC |
| ENSG00000170558 | UGUGCUU |
| ENSG00000170561 | GUGACAG |
| ENSG00000170561 | UGCAUUG |
| ENSG00000170561 | UUGUGAC |
| ENSG00000170571 | UUGGUUC |
| ENSG00000170577 | AACAUUC |
| ENSG00000170577 | ACAUUCA |
| ENSG00000170577 | CUGCAGC |
| ENSG00000170577 | UAUAAAG |
| ENSG00000170579 | ACAGGUG |
| ENSG00000170579 | AGGGUUG |
| ENSG00000170579 | GACAACU |
| ENSG00000170579 | GAGAACU |
| ENSG00000170579 | GAGGCAG |
| ENSG00000170581 | CAGCAGG |
| ENSG00000170581 | CUGGAAA |
| ENSG00000170581 | GUGCAAA |
| ENSG00000170581 | UGGAGAU |
| ENSG00000170604 | AAAGAGG |
| ENSG00000170604 | AGCAGCA |
| ENSG00000170604 | AUAAAGU |
| ENSG00000170604 | GGGGCAG |
| ENSG00000170606 | AAAGCUG |
| ENSG00000170616 | AACUCUA |
| ENSG00000170616 | AGGUAGU |
| ENSG00000170616 | AUGGCUU |
| ENSG00000170616 | CCUUCUG |
| ENSG00000170616 | CCUUCUU |
| ENSG00000170616 | GGCUCUG |
| ENSG00000170616 | GGUAGAC |
| ENSG00000170616 | UAUUGCU |
| ENSG00000170616 | UGUGCGU |
| ENSG00000170616 | UGUGCUU |
| ENSG00000170624 | AAGGCAC |
| ENSG00000170624 | AAUUAUU |
| ENSG00000170624 | AAUUUUA |
| ENSG00000170624 | AGAUAAA |
| ENSG00000170624 | AGCAGCA |
| ENSG00000170624 | CAAGAGC |
| ENSG00000170624 | CACAGUG |
| ENSG00000170624 | CAGCAGG |
| ENSG00000170624 | CCAGUGU |
| ENSG00000170624 | CCCCUGG |
| ENSG00000170624 | CCCUGUC |
| ENSG00000170624 | CUUUGGU |
| ENSG00000170624 | GACCCUG |

|                 |          |
|-----------------|----------|
| ENSG00000170624 | GAGGUAG  |
| ENSG00000170624 | GGCAGCG  |
| ENSG00000170624 | GUGCUUG  |
| ENSG00000170624 | UCACAUU  |
| ENSG00000170624 | UCAUUUG  |
| ENSG00000170624 | UCCCUUU  |
| ENSG00000170624 | UCCUUGC  |
| ENSG00000170624 | UGCAUUG  |
| ENSG00000170624 | UGCUGAC  |
| ENSG00000170624 | UUGGUCC  |
| ENSG00000170627 | AAGUCAC  |
| ENSG00000170633 | AGCAUUC  |
| ENSG00000170633 | AGCCCUU  |
| ENSG00000170638 | AAGGCAC  |
| ENSG00000170638 | GAGGUAG  |
| ENSG00000170647 | AAAGUAC  |
| ENSG00000170647 | AAAGUAU  |
| ENSG00000170647 | AAAGUGC  |
| ENSG00000170647 | AAGUGCA  |
| ENSG00000170647 | AGAUAAA  |
| ENSG00000170647 | CAAAGUG  |
| ENSG00000170647 | UCCCUGU  |
| ENSG00000170647 | UGCAAAG  |
| ENSG00000170647 | UGUAUGU  |
| ENSG00000170653 | ACAGGUG  |
| ENSG00000170653 | CUUGGGC  |
| ENSG00000170653 | GUAACAG  |
| ENSG00000170653 | UCCUGAG  |
| ENSG00000170653 | UGCCUG   |
| ENSG00000170677 | AAGUGCA  |
| ENSG00000170677 | AAUACUG  |
| ENSG00000170677 | ACUGGCC  |
| ENSG00000170677 | AGCAAAA  |
| ENSG00000170677 | AGCAGCG  |
| ENSG00000170677 | AGCAGCU  |
| ENSG00000170677 | AGCUUUAU |
| ENSG00000170677 | AGUGCAA  |
| ENSG00000170677 | AUUGCAC  |
| ENSG00000170677 | CAAAGUG  |
| ENSG00000170677 | CUGGCUC  |
| ENSG00000170677 | GAUAUGU  |
| ENSG00000170677 | GCACCAU  |
| ENSG00000170677 | GCUGGUG  |
| ENSG00000170677 | GGCAGCG  |
| ENSG00000170677 | GGCUCAG  |
| ENSG00000170677 | GUAGUGU  |
| ENSG00000170677 | GUGCAA   |
| ENSG00000170677 | GUGCUUG  |
| ENSG00000170677 | UAAUGCU  |
| ENSG00000170677 | UAUUGCU  |
| ENSG00000170677 | UCAAGUA  |
| ENSG00000170677 | UCACAGU  |
| ENSG00000170677 | UUCAAGC  |
| ENSG00000170681 | CACUGUU  |
| ENSG00000170681 | GCUUCCU  |
| ENSG00000170689 | AGCAAAA  |
| ENSG00000170689 | CACAAUG  |
| ENSG00000170689 | CAGACAG  |
| ENSG00000170689 | CCCACCG  |
| ENSG00000170689 | CCCACCU  |
| ENSG00000170689 | CUCCAC   |
| ENSG00000170689 | UCACAAG  |
| ENSG00000170689 | UCCACC   |
| ENSG00000170703 | CAGUCUG  |

|                 |         |
|-----------------|---------|
| ENSG00000170703 | GGGGCAG |
| ENSG00000170734 | ACUCAGC |
| ENSG00000170734 | AUGGAUU |
| ENSG00000170734 | GUGCUUG |
| ENSG00000170734 | UGUGCUU |
| ENSG00000170734 | UUCAAAU |
| ENSG00000170743 | ACCUGGA |
| ENSG00000170743 | AGCACCA |
| ENSG00000170743 | AUGUCUG |
| ENSG00000170743 | CCUUCAU |
| ENSG00000170743 | CUUUGGU |
| ENSG00000170743 | GAGGCUG |
| ENSG00000170743 | GGAGGCA |
| ENSG00000170743 | GGCAGUG |
| ENSG00000170743 | GUGCCUG |
| ENSG00000170743 | UAGGUAU |
| ENSG00000170743 | UGAAAGG |
| ENSG00000170743 | UGCAUUA |
| ENSG00000170743 | UCCAUUA |
| ENSG00000170743 | UUCUAAU |
| ENSG00000170743 | UUGGCAC |
| ENSG00000170743 | UUGGUCC |
| ENSG00000170745 | AUGGCUU |
| ENSG00000170745 | UGAGAAU |
| ENSG00000170748 | UGAAAGG |
| ENSG00000170759 | AUUGCAC |
| ENSG00000170759 | UAAGACG |
| ENSG00000170759 | UAAGACU |
| ENSG00000170759 | UUGGCAC |
| ENSG00000170776 | AAAGUGC |
| ENSG00000170776 | AAGUGCA |
| ENSG00000170776 | ACACACU |
| ENSG00000170776 | AGCACCA |
| ENSG00000170776 | AGCCAGU |
| ENSG00000170776 | CAGCUGG |
| ENSG00000170776 | CCCUGAG |
| ENSG00000170776 | CUCAAAC |
| ENSG00000170776 | CUGGAAA |
| ENSG00000170776 | GAGAUGA |
| ENSG00000170776 | GAGGUAU |
| ENSG00000170776 | GAUUGUA |
| ENSG00000170776 | GAUUGUC |
| ENSG00000170776 | GCAGCAU |
| ENSG00000170776 | GUAUGUU |
| ENSG00000170776 | UAAUAGU |
| ENSG00000170776 | UACAAAG |
| ENSG00000170776 | UGAAAUG |
| ENSG00000170776 | UUCAAAU |
| ENSG00000170776 | UUGACAC |
| ENSG00000170777 | ACAUUCA |
| ENSG00000170777 | CAAAGCA |
| ENSG00000170779 | AAGACAU |
| ENSG00000170779 | AGCACCA |
| ENSG00000170779 | AGCAGCU |
| ENSG00000170779 | UAAGACG |
| ENSG00000170779 | UAAGACU |
| ENSG00000170779 | UUCUAAU |
| ENSG00000170791 | UAAUGCU |
| ENSG00000170801 | CAGCAAA |
| ENSG00000170801 | CAGUAGA |
| ENSG00000170801 | GAAACAU |
| ENSG00000170801 | GGCUCAG |
| ENSG00000170801 | GUAAACA |
| ENSG00000170801 | UGAGGAC |

|                 |         |
|-----------------|---------|
| ENSG00000170802 | ACUGGCC |
| ENSG00000170802 | ACUGGCU |
| ENSG00000170802 | AGUGGUU |
| ENSG00000170802 | AUGAUGA |
| ENSG00000170802 | AUGAUGC |
| ENSG00000170802 | CCAUUAC |
| ENSG00000170802 | GAAUUGU |
| ENSG00000170802 | GAGUAUU |
| ENSG00000170802 | GGCAGUG |
| ENSG00000170802 | UGAGAAG |
| ENSG00000170819 | CAAAGCA |
| ENSG00000170832 | AAAACUG |
| ENSG00000170832 | AAAUUUC |
| ENSG00000170832 | AACUCUA |
| ENSG00000170832 | AAGUGCA |
| ENSG00000170832 | ACAUCAC |
| ENSG00000170832 | AGUAGAC |
| ENSG00000170832 | AGUGCAA |
| ENSG00000170832 | CAGGAAC |
| ENSG00000170832 | GAGGUAG |
| ENSG00000170832 | GUGCUUG |
| ENSG00000170832 | UGCAUUG |
| ENSG00000170832 | UUCUAAU |
| ENSG00000170836 | UGCAUAG |
| ENSG00000170852 | AGCAGCA |
| ENSG00000170852 | AGUGGUU |
| ENSG00000170854 | ACUGGAU |
| ENSG00000170871 | AAAGUGC |
| ENSG00000170871 | AACAUUC |
| ENSG00000170871 | AAUCCUU |
| ENSG00000170871 | ACAGUAU |
| ENSG00000170871 | ACCACAG |
| ENSG00000170871 | AGCAGCU |
| ENSG00000170871 | AGCCAGU |
| ENSG00000170871 | AGCCCUU |
| ENSG00000170871 | AUCCUUG |
| ENSG00000170871 | CACAGUG |
| ENSG00000170871 | CUAGUCC |
| ENSG00000170871 | CUCAAAC |
| ENSG00000170871 | CUGCAGC |
| ENSG00000170871 | GAGCCCU |
| ENSG00000170871 | GCAGAAG |
| ENSG00000170871 | GCAGCAU |
| ENSG00000170871 | GUCUCUG |
| ENSG00000170871 | UCAGCGG |
| ENSG00000170871 | UCAUACA |
| ENSG00000170871 | UUAGGAU |
| ENSG00000170871 | UUGGUCC |
| ENSG00000170873 | AACACUG |
| ENSG00000170873 | AGCCUGC |
| ENSG00000170873 | AGGAGCU |
| ENSG00000170873 | AUGCCUU |
| ENSG00000170873 | CACAGGG |
| ENSG00000170873 | CCUGCUG |
| ENSG00000170873 | GGAAUGU |
| ENSG00000170873 | UAUUGCU |
| ENSG00000170881 | AACGGAA |
| ENSG00000170881 | ACAAUAU |
| ENSG00000170881 | ACAGUAC |
| ENSG00000170881 | ACAGUAU |
| ENSG00000170881 | ACAUCAC |
| ENSG00000170881 | CACAGUG |
| ENSG00000170881 | UCAACAG |
| ENSG00000170881 | UCACAGG |

|                 |          |
|-----------------|----------|
| ENSG00000170881 | UUGGCAA  |
| ENSG00000170899 | GCACCAU  |
| ENSG00000170899 | UGGGAUC  |
| ENSG00000170903 | AAAGCUG  |
| ENSG00000170903 | AGCCCUU  |
| ENSG00000170915 | AAGGCAC  |
| ENSG00000170915 | AGCAAAA  |
| ENSG00000170915 | GCAGAAG  |
| ENSG00000170915 | GGCUCUG  |
| ENSG00000170915 | UCAUACA  |
| ENSG00000170915 | UCUGGAG  |
| ENSG00000170915 | UUGGCAC  |
| ENSG00000170921 | AAAGAGG  |
| ENSG00000170921 | AAAGUAA  |
| ENSG00000170921 | AAAGUAC  |
| ENSG00000170921 | AAAGUAU  |
| ENSG00000170921 | AAAGUGC  |
| ENSG00000170921 | AAAUGGU  |
| ENSG00000170921 | AACUACU  |
| ENSG00000170921 | AAGUAGC  |
| ENSG00000170921 | AAGUGCU  |
| ENSG00000170921 | AAUCACU  |
| ENSG00000170921 | ACAGUAC  |
| ENSG00000170921 | ACAUUCA  |
| ENSG00000170921 | ACCCAUU  |
| ENSG00000170921 | ACUGUAG  |
| ENSG00000170921 | ACUGUGU  |
| ENSG00000170921 | AGCCCUU  |
| ENSG00000170921 | AGGCAGG  |
| ENSG00000170921 | AGUGCAA  |
| ENSG00000170921 | AUAAAGU  |
| ENSG00000170921 | CACAGUG  |
| ENSG00000170921 | CACUCCU  |
| ENSG00000170921 | CAGCAAA  |
| ENSG00000170921 | CAGCAGA  |
| ENSG00000170921 | CAGUAGA  |
| ENSG00000170921 | CCAGCAU  |
| ENSG00000170921 | CCAGUGU  |
| ENSG00000170921 | CUAUACA  |
| ENSG00000170921 | CUCAGGG  |
| ENSG00000170921 | CUCCAUU  |
| ENSG00000170921 | CUGACUC  |
| ENSG00000170921 | CUGCAGG  |
| ENSG00000170921 | CUGCUCA  |
| ENSG00000170921 | CUUCUCU  |
| ENSG00000170921 | CUUGUGU  |
| ENSG00000170921 | GAGAACU  |
| ENSG00000170921 | GAGAUGA  |
| ENSG00000170921 | GAUUGUC  |
| ENSG00000170921 | GCUGGAU  |
| ENSG00000170921 | GGAGUCC  |
| ENSG00000170921 | GGCAGUG  |
| ENSG00000170921 | GGCAUUG  |
| ENSG00000170921 | GGUUACC  |
| ENSG00000170921 | GUGCCUG  |
| ENSG00000170921 | GUGCUUG  |
| ENSG00000170921 | GUGUGGC  |
| ENSG00000170921 | UAAUAGU  |
| ENSG00000170921 | UACAGUU  |
| ENSG00000170921 | UAGACUG  |
| ENSG00000170921 | UAUAAAAG |
| ENSG00000170921 | UCACAAG  |
| ENSG00000170921 | UCACACA  |
| ENSG00000170921 | UCACAUU  |

|                 |          |
|-----------------|----------|
| ENSG00000170921 | UCCCUUU  |
| ENSG00000170921 | UCCUGAG  |
| ENSG00000170921 | UCCUUGC  |
| ENSG00000170921 | UCUGGAA  |
| ENSG00000170921 | UCUUGAG  |
| ENSG00000170921 | UGAUCCA  |
| ENSG00000170921 | UGCAAAG  |
| ENSG00000170921 | UGCAUUG  |
| ENSG00000170921 | UGGGUAC  |
| ENSG00000170921 | UGUGCUU  |
| ENSG00000170921 | UGUGUCA  |
| ENSG00000170921 | UUAGAGA  |
| ENSG00000170921 | UUCUGCA  |
| ENSG00000170921 | UUCUUGU  |
| ENSG00000170921 | UUGUGUC  |
| ENSG00000170925 | CUCCAC   |
| ENSG00000170925 | CUUCUCU  |
| ENSG00000170925 | UCCACA   |
| ENSG00000170927 | AAAGUAU  |
| ENSG00000170927 | GUGCAA   |
| ENSG00000170927 | UUUGCAA  |
| ENSG00000170927 | UUUGCAC  |
| ENSG00000170941 | GGAGUCC  |
| ENSG00000170941 | GGAUUUU  |
| ENSG00000170941 | UAUUGCU  |
| ENSG00000170941 | UCCCUUG  |
| ENSG00000170941 | UCCCUUU  |
| ENSG00000170961 | AAAGUGC  |
| ENSG00000170961 | AAGUGCA  |
| ENSG00000170961 | AGCAGCA  |
| ENSG00000170961 | GAGGUAG  |
| ENSG00000170961 | GUGAGGU  |
| ENSG00000170962 | AACAAAC  |
| ENSG00000170962 | UCCAGUU  |
| ENSG00000170967 | UAUAAUA  |
| ENSG00000170989 | AAAGCUG  |
| ENSG00000170989 | AAUGUUG  |
| ENSG00000170989 | AAUUGCU  |
| ENSG00000170989 | AGUGCAA  |
| ENSG00000170989 | AUGUGCC  |
| ENSG00000170989 | UAAUGCU  |
| ENSG00000170989 | UGCAUUG  |
| ENSG00000171004 | ACCCUGU  |
| ENSG00000171017 | AAAUCCC  |
| ENSG00000171017 | ACAGGUG  |
| ENSG00000171017 | GGAGAGA  |
| ENSG00000171033 | CAAAGUG  |
| ENSG00000171033 | GAUUGGU  |
| ENSG00000171033 | GGCAGUG  |
| ENSG00000171033 | GGGGCAG  |
| ENSG00000171044 | AAGGCAC  |
| ENSG00000171044 | AAUACUG  |
| ENSG00000171044 | ACAGUAC  |
| ENSG00000171044 | ACAUAGA  |
| ENSG00000171044 | GUGACAG  |
| ENSG00000171044 | GUGCCUG  |
| ENSG00000171055 | GUGAAUG  |
| ENSG00000171055 | UAAUACA  |
| ENSG00000171055 | UAAUGCU  |
| ENSG00000171056 | AGCUUAU  |
| ENSG00000171056 | AUAU AAC |
| ENSG00000171056 | AUGUCUG  |
| ENSG00000171056 | GGCUCAG  |
| ENSG00000171056 | UCACAGU  |

|                 |         |
|-----------------|---------|
| ENSG00000171067 | AUUGCAC |
| ENSG00000171067 | GCACCAU |
| ENSG00000171067 | GGAAGCC |
| ENSG00000171094 | UUGGCAC |
| ENSG00000171105 | AGCAAAA |
| ENSG00000171105 | AGCAGCG |
| ENSG00000171105 | AUAUUAU |
| ENSG00000171105 | CACAGUG |
| ENSG00000171105 | CAGACAG |
| ENSG00000171105 | CAGCAA  |
| ENSG00000171105 | CCUUCAU |
| ENSG00000171105 | CUUGUAU |
| ENSG00000171105 | GAAAACA |
| ENSG00000171105 | GAGGUAG |
| ENSG00000171105 | GAGGUAU |
| ENSG00000171105 | GGCUCUG |
| ENSG00000171105 | GGUAGAC |
| ENSG00000171105 | UAGACUG |
| ENSG00000171105 | UCACAGG |
| ENSG00000171105 | UGACAUC |
| ENSG00000171105 | UUGGUCC |
| ENSG00000171109 | AAAAACC |
| ENSG00000171109 | CCCUGAG |
| ENSG00000171109 | CUCAGGG |
| ENSG00000171119 | GAGGUAG |
| ENSG00000171119 | GAGGUAU |
| ENSG00000171121 | UGGCCAC |
| ENSG00000171126 | UGCUCAC |
| ENSG00000171132 | ACAGUAU |
| ENSG00000171132 | ACAUUCA |
| ENSG00000171132 | AGAUAAA |
| ENSG00000171132 | AGCCAGU |
| ENSG00000171132 | AGCUUAU |
| ENSG00000171132 | AUAAUAC |
| ENSG00000171132 | AUACAAG |
| ENSG00000171132 | AUACCUC |
| ENSG00000171132 | AUGAUGC |
| ENSG00000171132 | AUGCCUU |
| ENSG00000171132 | AUGGAUU |
| ENSG00000171132 | AUUGCAC |
| ENSG00000171132 | CACAAUG |
| ENSG00000171132 | CACUGUU |
| ENSG00000171132 | CAGCAA  |
| ENSG00000171132 | CAGCUGG |
| ENSG00000171132 | CUACAGU |
| ENSG00000171132 | GACUUCC |
| ENSG00000171132 | GAGAUGA |
| ENSG00000171132 | GAGUAUU |
| ENSG00000171132 | GCCUGAU |
| ENSG00000171132 | GUCAGUU |
| ENSG00000171132 | GUGCCAC |
| ENSG00000171132 | GUGCUUG |
| ENSG00000171132 | UCACAAG |
| ENSG00000171132 | UCACAUU |
| ENSG00000171132 | UCAUAGA |
| ENSG00000171132 | UGCAGCU |
| ENSG00000171132 | UGUGCUU |
| ENSG00000171132 | UUGGCAA |
| ENSG00000171150 | AAGGCAC |
| ENSG00000171150 | AGUGCAA |
| ENSG00000171150 | AUACAAG |
| ENSG00000171150 | GUGCAA  |
| ENSG00000171160 | ACAGUAU |
| ENSG00000171160 | CUCCAGC |

|                 |          |
|-----------------|----------|
| ENSG00000171160 | CUGUUGA  |
| ENSG00000171160 | GGAGAGA  |
| ENSG00000171160 | UCUCCAA  |
| ENSG00000171169 | CACAGUG  |
| ENSG00000171169 | CCCCUGG  |
| ENSG00000171169 | UCCUGAG  |
| ENSG00000171169 | UGCCAGC  |
| ENSG00000171204 | CAGCAAA  |
| ENSG00000171206 | AAAGUGC  |
| ENSG00000171206 | AAGUGCU  |
| ENSG00000171206 | CAAAGUG  |
| ENSG00000171206 | UACAAAG  |
| ENSG00000171208 | AUAAAAGU |
| ENSG00000171208 | UUGGCAC  |
| ENSG00000171219 | CCCUGAG  |
| ENSG00000171219 | GGGGUGG  |
| ENSG00000171219 | GGUGGGC  |
| ENSG00000171219 | UUGGCAC  |
| ENSG00000171223 | CCAGUGU  |
| ENSG00000171223 | GCGGGGC  |
| ENSG00000171223 | GGCGGGG  |
| ENSG00000171224 | UCCCUCU  |
| ENSG00000171227 | GGCAGGG  |
| ENSG00000171246 | AAAGUAU  |
| ENSG00000171246 | AACACUG  |
| ENSG00000171246 | ACAAUAU  |
| ENSG00000171246 | ACAGGUG  |
| ENSG00000171246 | ACCCAUU  |
| ENSG00000171246 | AGCAAAA  |
| ENSG00000171246 | AGUGCUU  |
| ENSG00000171246 | AUAAUAC  |
| ENSG00000171246 | AUGGCUU  |
| ENSG00000171246 | CAAAGUG  |
| ENSG00000171246 | CACAGUG  |
| ENSG00000171246 | CAGCAAA  |
| ENSG00000171246 | CCCACCG  |
| ENSG00000171246 | CCCACCU  |
| ENSG00000171246 | CUCAGGG  |
| ENSG00000171246 | CUCCCAC  |
| ENSG00000171246 | CUGCAGC  |
| ENSG00000171246 | CUUUGGU  |
| ENSG00000171246 | GAGAAGA  |
| ENSG00000171246 | GCUGGUG  |
| ENSG00000171246 | GGACCUG  |
| ENSG00000171246 | GGCAGGG  |
| ENSG00000171246 | UCCAGAG  |
| ENSG00000171246 | UCCCACC  |
| ENSG00000171246 | UCUAGAG  |
| ENSG00000171246 | UGCAGCU  |
| ENSG00000171246 | UGGGACA  |
| ENSG00000171246 | UUGGCAC  |
| ENSG00000171246 | UUGGUUC  |
| ENSG00000171282 | AAAAAUC  |
| ENSG00000171282 | AUGGCUU  |
| ENSG00000171282 | CAGUGCA  |
| ENSG00000171282 | CCUGUAC  |
| ENSG00000171282 | GAGAAAU  |
| ENSG00000171282 | GGUGGGC  |
| ENSG00000171282 | GUUCAUG  |
| ENSG00000171282 | UCCUGU   |
| ENSG00000171282 | UGCAUAG  |
| ENSG00000171282 | UUCUGCA  |
| ENSG00000171282 | UUUUUGC  |
| ENSG00000171302 | AAAGUGC  |



|                 |          |
|-----------------|----------|
| ENSG00000171302 | AGGAGCU  |
| ENSG00000171302 | GAGGUAG  |
| ENSG00000171303 | CUGGGGG  |
| ENSG00000171303 | GAGACCU  |
| ENSG00000171303 | GAGGUAU  |
| ENSG00000171303 | GCUGGUG  |
| ENSG00000171303 | GGACUGC  |
| ENSG00000171303 | UGCAAAG  |
| ENSG00000171307 | GCCUGAU  |
| ENSG00000171310 | UACAAAG  |
| ENSG00000171314 | ACAUCAC  |
| ENSG00000171314 | AGGGAGG  |
| ENSG00000171314 | AUUGCAC  |
| ENSG00000171314 | GGAAUGU  |
| ENSG00000171314 | UACAGUU  |
| ENSG00000171314 | UGCAGCU  |
| ENSG00000171316 | AAAGGUA  |
| ENSG00000171316 | AACAAAC  |
| ENSG00000171316 | AAGAACC  |
| ENSG00000171316 | AAGACAU  |
| ENSG00000171316 | ACAUCAC  |
| ENSG00000171316 | ACAUUCA  |
| ENSG00000171316 | ACUGUAG  |
| ENSG00000171316 | AGCAAAA  |
| ENSG00000171316 | AGCAGCA  |
| ENSG00000171316 | AGCUGCC  |
| ENSG00000171316 | AGUAACA  |
| ENSG00000171316 | CCAGUGC  |
| ENSG00000171316 | CUACAGU  |
| ENSG00000171316 | CUUACAG  |
| ENSG00000171316 | GAGGUAG  |
| ENSG00000171316 | GAGGUAU  |
| ENSG00000171316 | GAGUGUG  |
| ENSG00000171316 | GAUUGUC  |
| ENSG00000171316 | GGCAGCG  |
| ENSG00000171316 | GUGCCAC  |
| ENSG00000171316 | UAAUGCU  |
| ENSG00000171316 | UACAGUU  |
| ENSG00000171316 | UAUAAAAG |
| ENSG00000171316 | UAUUGCU  |
| ENSG00000171316 | UCAACAG  |
| ENSG00000171316 | UCACAGG  |
| ENSG00000171316 | UCACAGU  |
| ENSG00000171316 | UCACAUU  |
| ENSG00000171316 | UCAUACA  |
| ENSG00000171316 | UGACCUA  |
| ENSG00000171316 | UGCAUUAU |
| ENSG00000171316 | UGGUACC  |
| ENSG00000171316 | UGUAUAA  |
| ENSG00000171316 | UUAGAGA  |
| ENSG00000171320 | GCAGAAG  |
| ENSG00000171320 | UAUAAAAG |
| ENSG00000171357 | AAUCCUU  |
| ENSG00000171357 | ACAUCAC  |
| ENSG00000171357 | AGCAGCA  |
| ENSG00000171357 | GGGUAAG  |
| ENSG00000171357 | UGACAUC  |
| ENSG00000171357 | UCCAUUA  |
| ENSG00000171365 | AAAGAGG  |
| ENSG00000171365 | AAAGCUG  |
| ENSG00000171365 | AAAGUAA  |
| ENSG00000171365 | AAAGUAU  |
| ENSG00000171365 | AACAUUC  |
| ENSG00000171365 | AACUGGU  |

|                 |         |
|-----------------|---------|
| ENSG00000171365 | AAGUAGC |
| ENSG00000171365 | ACCCUGU |
| ENSG00000171365 | ACCUGGA |
| ENSG00000171365 | ACUGCAG |
| ENSG00000171365 | ACUGGCU |
| ENSG00000171365 | AGCUGCC |
| ENSG00000171365 | AGGUAGU |
| ENSG00000171365 | AGUACUG |
| ENSG00000171365 | AGUAGAC |
| ENSG00000171365 | AUAAAGU |
| ENSG00000171365 | CAAAGCA |
| ENSG00000171365 | CACAGUG |
| ENSG00000171365 | CAGACAG |
| ENSG00000171365 | CAUAUUG |
| ENSG00000171365 | CCUUCUU |
| ENSG00000171365 | CUACAAA |
| ENSG00000171365 | CUCUUCC |
| ENSG00000171365 | GACCUGG |
| ENSG00000171365 | GAGAAGA |
| ENSG00000171365 | GCAACUU |
| ENSG00000171365 | GCACCAU |
| ENSG00000171365 | GGCUCAG |
| ENSG00000171365 | GGUUGAC |
| ENSG00000171365 | GUAGUGU |
| ENSG00000171365 | GUGCUUG |
| ENSG00000171365 | GUGUCAC |
| ENSG00000171365 | GUUAAUG |
| ENSG00000171365 | UAAUGCU |
| ENSG00000171365 | UAUUACC |
| ENSG00000171365 | UCACAGG |
| ENSG00000171365 | UCCCUUU |
| ENSG00000171365 | UCCUGAG |
| ENSG00000171365 | UCUGGAG |
| ENSG00000171365 | UGAGAAG |
| ENSG00000171365 | UGGAUAA |
| ENSG00000171365 | UGUAUAA |
| ENSG00000171365 | UGUGCUU |
| ENSG00000171365 | UUGGCAC |
| ENSG00000171365 | UUGGUUC |
| ENSG00000171368 | AAAAAUC |
| ENSG00000171368 | AAAGUGC |
| ENSG00000171368 | AAAUUUC |
| ENSG00000171368 | AUAAAGU |
| ENSG00000171368 | AUAUAAC |
| ENSG00000171368 | AUCCCUU |
| ENSG00000171368 | CUAGUAG |
| ENSG00000171368 | UCAAGUA |
| ENSG00000171368 | UCCCUUG |
| ENSG00000171368 | UUCAAGC |
| ENSG00000171368 | UUGACAC |
| ENSG00000171388 | AAGGCAC |
| ENSG00000171388 | AGCAGCA |
| ENSG00000171388 | AGCAGCG |
| ENSG00000171388 | AGCAGCU |
| ENSG00000171388 | AUAAAGU |
| ENSG00000171388 | CAGGCUC |
| ENSG00000171388 | CUGACUC |
| ENSG00000171388 | GAGAAGA |
| ENSG00000171388 | GAGACCU |
| ENSG00000171388 | GGCCUG  |
| ENSG00000171388 | UACAAAG |
| ENSG00000171388 | UCCAGAG |
| ENSG00000171396 | AGCAGCA |
| ENSG00000171396 | AGCAGCU |

|                 |         |
|-----------------|---------|
| ENSG00000171396 | CAGCAGA |
| ENSG00000171396 | CAGCUGG |
| ENSG00000171396 | GCAGCAU |
| ENSG00000171403 | CAGCUGG |
| ENSG00000171408 | AAAGUUU |
| ENSG00000171408 | AACAGUC |
| ENSG00000171408 | AACUCUA |
| ENSG00000171408 | AAUACUG |
| ENSG00000171408 | ACAAGGU |
| ENSG00000171408 | ACAGGUG |
| ENSG00000171408 | ACAGUAU |
| ENSG00000171408 | AGUGCAA |
| ENSG00000171408 | AUGCAUU |
| ENSG00000171408 | AUGGCUU |
| ENSG00000171408 | CAAAGUG |
| ENSG00000171408 | CAGCUGG |
| ENSG00000171408 | CAGGCUC |
| ENSG00000171408 | CAGUAGA |
| ENSG00000171408 | CAGUAGU |
| ENSG00000171408 | CUAUACA |
| ENSG00000171408 | CUUUGGU |
| ENSG00000171408 | GUGCAAA |
| ENSG00000171408 | UCACAAG |
| ENSG00000171408 | UCACAGG |
| ENSG00000171408 | UCCAGUU |
| ENSG00000171408 | UGCAAAG |
| ENSG00000171408 | UUGGCAA |
| ENSG00000171408 | UUGGCAC |
| ENSG00000171408 | UUGUGAC |
| ENSG00000171435 | AAAGAGC |
| ENSG00000171435 | AACAGUC |
| ENSG00000171435 | AAGUGCU |
| ENSG00000171435 | ACAUAGA |
| ENSG00000171435 | ACCCAUU |
| ENSG00000171435 | ACUGUGU |
| ENSG00000171435 | AGCUGCC |
| ENSG00000171435 | CAGUUAC |
| ENSG00000171435 | CCCUGAG |
| ENSG00000171435 | CUCAAAC |
| ENSG00000171435 | CUCAGGG |
| ENSG00000171435 | CUCUGGG |
| ENSG00000171435 | GAAGGAA |
| ENSG00000171435 | GAGCUAA |
| ENSG00000171435 | GAGCUGC |
| ENSG00000171435 | GCUACAU |
| ENSG00000171435 | GGCAGCG |
| ENSG00000171435 | GGCCUG  |
| ENSG00000171435 | GGUGGUC |
| ENSG00000171435 | UAGACUG |
| ENSG00000171435 | UAUAAAG |
| ENSG00000171435 | UCCUGAG |
| ENSG00000171435 | UCUAGAG |
| ENSG00000171435 | UCUGGAA |
| ENSG00000171435 | UGGCCCU |
| ENSG00000171435 | UUCAAAU |
| ENSG00000171435 | UUGGCAA |
| ENSG00000171443 | AGCACCA |
| ENSG00000171443 | CACCAGC |
| ENSG00000171444 | AAAGUAA |
| ENSG00000171444 | AAUACUG |
| ENSG00000171444 | CUGCAGG |
| ENSG00000171444 | GAAACAU |
| ENSG00000171444 | GUGCUUG |
| ENSG00000171444 | UCAAGUA |

|                 |         |
|-----------------|---------|
| ENSG00000171444 | UCCCUUU |
| ENSG00000171444 | UCUGGAA |
| ENSG00000171444 | UUCAAAU |
| ENSG00000171444 | UUCAAGC |
| ENSG00000171450 | GGGGUGG |
| ENSG00000171450 | UUGGCAC |
| ENSG00000171451 | AAAUCCC |
| ENSG00000171451 | AACAAAC |
| ENSG00000171451 | AAUCUCU |
| ENSG00000171451 | AGCAGCA |
| ENSG00000171451 | AGCCCUU |
| ENSG00000171451 | AUAAUAC |
| ENSG00000171451 | AUCACUA |
| ENSG00000171451 | CAGGAAC |
| ENSG00000171451 | CCUGCUG |
| ENSG00000171451 | CUCCCAA |
| ENSG00000171451 | CUCCCAC |
| ENSG00000171451 | CUGCAGC |
| ENSG00000171451 | GAAACAU |
| ENSG00000171451 | GACCUGG |
| ENSG00000171451 | GAGAAAU |
| ENSG00000171451 | GCAGCAU |
| ENSG00000171451 | GCAGGAC |
| ENSG00000171451 | GGAGGCA |
| ENSG00000171451 | GGCAGUG |
| ENSG00000171451 | GGGGGAA |
| ENSG00000171451 | GUAAACA |
| ENSG00000171451 | UCUGGAG |
| ENSG00000171451 | UGACAUC |
| ENSG00000171451 | UGAGUCU |
| ENSG00000171451 | UGCUGAC |
| ENSG00000171451 | UUGACAC |
| ENSG00000171451 | UUGAGGC |
| ENSG00000171451 | UUUGCAA |
| ENSG00000171451 | UUUGCAC |
| ENSG00000171456 | AACACUG |
| ENSG00000171456 | ACAAUUA |
| ENSG00000171456 | ACACACC |
| ENSG00000171456 | ACAGGUG |
| ENSG00000171456 | ACCCUGU |
| ENSG00000171456 | ACUGUGU |
| ENSG00000171456 | AGUACUG |
| ENSG00000171456 | AGUGCUU |
| ENSG00000171456 | CAGCAGG |
| ENSG00000171456 | CCAGUAC |
| ENSG00000171456 | CUGGGCA |
| ENSG00000171456 | CUUACAG |
| ENSG00000171456 | GGUGGGC |
| ENSG00000171456 | UAAUGCU |
| ENSG00000171456 | UCACAUU |
| ENSG00000171456 | UGCAUAG |
| ENSG00000171466 | UCCACA  |
| ENSG00000171471 | AUCCCUU |
| ENSG00000171475 | AAAGAGC |
| ENSG00000171475 | AAAGUGC |
| ENSG00000171475 | AAGGCAC |
| ENSG00000171475 | AAGUGCU |
| ENSG00000171475 | ACACACC |
| ENSG00000171475 | AGUGAUC |
| ENSG00000171475 | AGUGCCG |
| ENSG00000171475 | AGUGCCU |
| ENSG00000171475 | CACAGUG |
| ENSG00000171475 | CCCACCU |
| ENSG00000171475 | CCUGAG  |

|                 |         |
|-----------------|---------|
| ENSG00000171475 | CCUUCUG |
| ENSG00000171475 | CUCUUCC |
| ENSG00000171475 | CUGGGCA |
| ENSG00000171475 | GACCCUG |
| ENSG00000171475 | GAGACCU |
| ENSG00000171475 | GAGUUGG |
| ENSG00000171475 | GAUCAGA |
| ENSG00000171475 | GGAAGAC |
| ENSG00000171475 | GUAGUGU |
| ENSG00000171475 | UCAAGUA |
| ENSG00000171475 | UCACAGG |
| ENSG00000171475 | UCACAGU |
| ENSG00000171475 | UCACAUU |
| ENSG00000171475 | UCCACA  |
| ENSG00000171475 | UCCCUU  |
| ENSG00000171475 | UGAGAAG |
| ENSG00000171475 | UGCAUAG |
| ENSG00000171475 | UGUGCUU |
| ENSG00000171475 | UUCAAGC |
| ENSG00000171475 | UUGGUCC |
| ENSG00000171492 | GCAGCAU |
| ENSG00000171502 | AGCACCA |
| ENSG00000171502 | AGGUAGU |
| ENSG00000171502 | CCAGUAC |
| ENSG00000171502 | GAGGUAG |
| ENSG00000171502 | GUAGUGU |
| ENSG00000171502 | UAUUGCU |
| ENSG00000171522 | AUACCUC |
| ENSG00000171522 | CUCACAC |
| ENSG00000171522 | CUUGUAU |
| ENSG00000171522 | GAGAAGA |
| ENSG00000171522 | UCACAAG |
| ENSG00000171522 | UCUCACC |
| ENSG00000171532 | AAAAGUA |
| ENSG00000171532 | AAAGAGG |
| ENSG00000171532 | AAAGUGC |
| ENSG00000171532 | AAGAACC |
| ENSG00000171532 | AAGUGCA |
| ENSG00000171532 | CAAAGUG |
| ENSG00000171532 | CCCCUGG |
| ENSG00000171532 | CGUCGCC |
| ENSG00000171532 | CUUCACC |
| ENSG00000171532 | GAUUGUA |
| ENSG00000171532 | GGCUCAG |
| ENSG00000171532 | UACAAAG |
| ENSG00000171532 | UCACCAC |
| ENSG00000171532 | UCCGCGC |
| ENSG00000171532 | UCCUUGC |
| ENSG00000171532 | UGCAUAG |
| ENSG00000171532 | UGCAUAU |
| ENSG00000171532 | UGUGCGU |
| ENSG00000171532 | UCCAUA  |
| ENSG00000171532 | UCCUCG  |
| ENSG00000171533 | AAGUGCA |
| ENSG00000171533 | AAUUUUA |
| ENSG00000171533 | AGCAUUC |
| ENSG00000171533 | CACAAUG |
| ENSG00000171533 | CAGCAGG |
| ENSG00000171533 | CUAUACA |
| ENSG00000171533 | GUCAUUG |
| ENSG00000171533 | GUGGCC  |
| ENSG00000171533 | UGGCCAC |
| ENSG00000171540 | AAAGAGC |
| ENSG00000171540 | ACCAGCA |

|                 |          |
|-----------------|----------|
| ENSG00000171540 | ACUCCAG  |
| ENSG00000171540 | AGGGUUG  |
| ENSG00000171540 | AUAUUAU  |
| ENSG00000171540 | AUGUAAU  |
| ENSG00000171540 | CAGUCCA  |
| ENSG00000171540 | CUCAAAC  |
| ENSG00000171540 | CUCCAGC  |
| ENSG00000171540 | CUGCCCC  |
| ENSG00000171540 | GAUUGUA  |
| ENSG00000171540 | GAUUGUC  |
| ENSG00000171540 | GCAGAAG  |
| ENSG00000171540 | GUAACAG  |
| ENSG00000171540 | GUUCAUG  |
| ENSG00000171540 | UCACAUU  |
| ENSG00000171540 | UCAUUCG  |
| ENSG00000171540 | UCCCUUG  |
| ENSG00000171540 | UUCUGCA  |
| ENSG00000171540 | UUGUUCG  |
| ENSG00000171551 | CUGCCCC  |
| ENSG00000171552 | AAAAACC  |
| ENSG00000171552 | AAAGAGC  |
| ENSG00000171552 | AACAAAC  |
| ENSG00000171552 | AGCAGCU  |
| ENSG00000171552 | AGUGGUU  |
| ENSG00000171552 | CACCAGC  |
| ENSG00000171552 | CAGCAGA  |
| ENSG00000171552 | CUUCACC  |
| ENSG00000171552 | CUUGGGC  |
| ENSG00000171552 | GAGGCAG  |
| ENSG00000171552 | GAGGUAG  |
| ENSG00000171552 | GGAAGAC  |
| ENSG00000171552 | GGACGGA  |
| ENSG00000171552 | GGCAGGG  |
| ENSG00000171552 | GGGUGGU  |
| ENSG00000171552 | UAUUACC  |
| ENSG00000171552 | UUGGUCC  |
| ENSG00000171560 | ACAGUAU  |
| ENSG00000171560 | AGCACCA  |
| ENSG00000171560 | CUACAGU  |
| ENSG00000171570 | AGCAGCA  |
| ENSG00000171570 | GAGGUAG  |
| ENSG00000171570 | GAGGUAU  |
| ENSG00000171570 | UCACAUU  |
| ENSG00000171570 | UGCAGCU  |
| ENSG00000171574 | UCCACA   |
| ENSG00000171587 | AAAGGUA  |
| ENSG00000171587 | GAGUCUU  |
| ENSG00000171587 | GUGCAAA  |
| ENSG00000171587 | UAUAAAAG |
| ENSG00000171587 | UUCUAAU  |
| ENSG00000171587 | UUUGCAC  |
| ENSG00000171596 | CUGCUCU  |
| ENSG00000171603 | AAUUUUA  |
| ENSG00000171603 | ACCAGCA  |
| ENSG00000171603 | ACUGGCU  |
| ENSG00000171603 | AGCAGCU  |
| ENSG00000171603 | CUCUGGG  |
| ENSG00000171603 | GAGUCUU  |
| ENSG00000171603 | GUCAACA  |
| ENSG00000171603 | GUCAGUU  |
| ENSG00000171603 | UACAAAG  |
| ENSG00000171603 | UGACCUA  |
| ENSG00000171604 | AUUGCAC  |
| ENSG00000171608 | AAAGUUU  |

|                 |          |
|-----------------|----------|
| ENSG00000171608 | ACAAUUAU |
| ENSG00000171608 | AGAUGUG  |
| ENSG00000171608 | AUAAAGU  |
| ENSG00000171608 | AUGGCUU  |
| ENSG00000171608 | CAGCUGG  |
| ENSG00000171608 | UCACAGG  |
| ENSG00000171608 | UCACAGU  |
| ENSG00000171608 | UGCAAAG  |
| ENSG00000171617 | AAGAACC  |
| ENSG00000171617 | AAGUCAC  |
| ENSG00000171617 | AAGUGUG  |
| ENSG00000171617 | AAUCUCU  |
| ENSG00000171617 | ACAGGUG  |
| ENSG00000171617 | ACUAGAU  |
| ENSG00000171617 | AGCAAAA  |
| ENSG00000171617 | CAGCUGG  |
| ENSG00000171617 | GAAACAU  |
| ENSG00000171617 | GACAACU  |
| ENSG00000171617 | GCAGAAG  |
| ENSG00000171617 | GCCCUUA  |
| ENSG00000171617 | GUGAAUG  |
| ENSG00000171617 | GUGCAAA  |
| ENSG00000171617 | UACAAAG  |
| ENSG00000171617 | UCAAGUA  |
| ENSG00000171617 | UCACACA  |
| ENSG00000171617 | UGACCUA  |
| ENSG00000171617 | UGCAUUG  |
| ENSG00000171617 | UGUGUGG  |
| ENSG00000171617 | UUGUGUC  |
| ENSG00000171621 | AAAACUG  |
| ENSG00000171621 | AAACUGU  |
| ENSG00000171621 | AAAGAAU  |
| ENSG00000171621 | AAAGGUA  |
| ENSG00000171621 | AAAUGGU  |
| ENSG00000171621 | AGCAGCU  |
| ENSG00000171621 | AGGUUAU  |
| ENSG00000171621 | AUAAAGU  |
| ENSG00000171621 | AUAUUUAU |
| ENSG00000171621 | AUUGCAC  |
| ENSG00000171621 | GAGUUGG  |
| ENSG00000171621 | GGCUCAG  |
| ENSG00000171621 | GUGCUUG  |
| ENSG00000171621 | UCCUGAG  |
| ENSG00000171621 | UUGGCAC  |
| ENSG00000171634 | ACAUUCA  |
| ENSG00000171634 | AGCAGCA  |
| ENSG00000171634 | AGCAGCG  |
| ENSG00000171634 | AGCAGCU  |
| ENSG00000171634 | CUUCACC  |
| ENSG00000171634 | CUUGUAU  |
| ENSG00000171634 | GGCAUUG  |
| ENSG00000171634 | GUGCAAA  |
| ENSG00000171634 | UACAAAG  |
| ENSG00000171634 | UGAAAUG  |
| ENSG00000171634 | UGCAUAG  |
| ENSG00000171634 | UUAUGCA  |
| ENSG00000171634 | UUCAAAU  |
| ENSG00000171634 | UUCCAUA  |
| ENSG00000171680 | AAGUCUU  |
| ENSG00000171680 | UAUAAAG  |
| ENSG00000171700 | GCCUGGG  |
| ENSG00000171700 | UUUUUGC  |
| ENSG00000171703 | GAAACAU  |
| ENSG00000171720 | AAAAACC  |

|                 |          |
|-----------------|----------|
| ENSG00000171723 | AACACUG  |
| ENSG00000171723 | AGCAUUC  |
| ENSG00000171723 | AGUAGUU  |
| ENSG00000171723 | AUGUGGG  |
| ENSG00000171723 | CAGACAG  |
| ENSG00000171723 | CAGUCUG  |
| ENSG00000171723 | CAGUUAC  |
| ENSG00000171723 | GAGAAAU  |
| ENSG00000171723 | GCUGGUG  |
| ENSG00000171723 | GCUGUCU  |
| ENSG00000171723 | UAAUAUC  |
| ENSG00000171723 | UAUGGUU  |
| ENSG00000171723 | UGCAUAG  |
| ENSG00000171735 | AACAGUC  |
| ENSG00000171735 | AACUACU  |
| ENSG00000171735 | AAGUCUU  |
| ENSG00000171735 | ACAGGUG  |
| ENSG00000171735 | ACAUUAC  |
| ENSG00000171735 | ACUGCAG  |
| ENSG00000171735 | ACUGGCC  |
| ENSG00000171735 | ACUGUGU  |
| ENSG00000171735 | ACUUGGA  |
| ENSG00000171735 | AGCAAAA  |
| ENSG00000171735 | AGCACCA  |
| ENSG00000171735 | AGCAGCU  |
| ENSG00000171735 | AGUGCAA  |
| ENSG00000171735 | AGUGCUG  |
| ENSG00000171735 | CAAUUGC  |
| ENSG00000171735 | CAGCAGG  |
| ENSG00000171735 | CCAGCAU  |
| ENSG00000171735 | CUAUACA  |
| ENSG00000171735 | GCACCAU  |
| ENSG00000171735 | GUGUGGC  |
| ENSG00000171735 | UAAUGCU  |
| ENSG00000171735 | UACAGUU  |
| ENSG00000171735 | UAUAAAAG |
| ENSG00000171735 | UGUGUGG  |
| ENSG00000171735 | UUGGCAA  |
| ENSG00000171735 | UUGGCAC  |
| ENSG00000171777 | AAAUUUC  |
| ENSG00000171777 | AGAUAAA  |
| ENSG00000171777 | CCUGCUG  |
| ENSG00000171777 | CUAGGCU  |
| ENSG00000171786 | AAAGUGC  |
| ENSG00000171786 | AAGGCAC  |
| ENSG00000171786 | AAGUGCA  |
| ENSG00000171786 | CAAAGUG  |
| ENSG00000171786 | GAUUGUC  |
| ENSG00000171786 | UAUAAAAG |
| ENSG00000171791 | AAAUGGU  |
| ENSG00000171791 | AAGUGUG  |
| ENSG00000171791 | AAUACUG  |
| ENSG00000171791 | AAUGCCC  |
| ENSG00000171791 | ACAUUAC  |
| ENSG00000171791 | ACCUGGA  |
| ENSG00000171791 | ACUGGAU  |
| ENSG00000171791 | ACUGUAG  |
| ENSG00000171791 | AGCAGCA  |
| ENSG00000171791 | AGCAGCG  |
| ENSG00000171791 | AGCAGCU  |
| ENSG00000171791 | AGCUUAU  |
| ENSG00000171791 | CACACCU  |
| ENSG00000171791 | CAGACAG  |
| ENSG00000171791 | CAUGGGU  |



|                 |         |
|-----------------|---------|
| ENSG00000171791 | CCCUGAG |
| ENSG00000171791 | CUCGGCG |
| ENSG00000171791 | CUUGGAG |
| ENSG00000171791 | GAAUUGU |
| ENSG00000171791 | GAGAUGA |
| ENSG00000171791 | GCUUCCU |
| ENSG00000171791 | GGAUGAG |
| ENSG00000171791 | GGCAGUG |
| ENSG00000171791 | GGGUUUA |
| ENSG00000171791 | GUAAACA |
| ENSG00000171791 | UAAUACA |
| ENSG00000171791 | UCCCUUG |
| ENSG00000171791 | UGUCUGC |
| ENSG00000171791 | UGUCUGG |
| ENSG00000171791 | UUGACAC |
| ENSG00000171791 | UUGGCAA |
| ENSG00000171791 | UUGGCAC |
| ENSG00000171791 | UUUCAAC |
| ENSG00000171812 | CAAAGCA |
| ENSG00000171812 | GAGGGGC |
| ENSG00000171812 | UGUGUCA |
| ENSG00000171813 | AGCAGCA |
| ENSG00000171813 | UUGGUCC |
| ENSG00000171823 | GGAAGAC |
| ENSG00000171823 | GUGAAUG |
| ENSG00000171823 | UCACAUU |
| ENSG00000171843 | AAGGCAC |
| ENSG00000171843 | ACUGGCU |
| ENSG00000171843 | GAGAUGA |
| ENSG00000171843 | GAGGCUG |
| ENSG00000171843 | GUCAUUG |
| ENSG00000171843 | UGUUGAA |
| ENSG00000171843 | UUCAAGC |
| ENSG00000171843 | UUGGUCC |
| ENSG00000171848 | GAGGUAU |
| ENSG00000171848 | UGAAGCU |
| ENSG00000171862 | AAAGUGC |
| ENSG00000171862 | AAUACUG |
| ENSG00000171862 | ACAGUAU |
| ENSG00000171862 | ACCACAG |
| ENSG00000171862 | AGAUAAA |
| ENSG00000171862 | AUGCCUU |
| ENSG00000171862 | CACAAUG |
| ENSG00000171862 | CCUUCAU |
| ENSG00000171862 | CUGGGCA |
| ENSG00000171862 | GAGGCUG |
| ENSG00000171862 | GAUUGGU |
| ENSG00000171862 | GUUAAUG |
| ENSG00000171862 | UGCAAAG |
| ENSG00000171862 | UGCAUAG |
| ENSG00000171862 | UUCAAGC |
| ENSG00000171864 | CAUAUUG |
| ENSG00000171864 | GAGAAGA |
| ENSG00000171864 | UGAGAAG |
| ENSG00000171864 | UGAGAAU |
| ENSG00000171867 | AGUGCAA |
| ENSG00000171867 | GUCUACU |
| ENSG00000171867 | UGCAAAG |
| ENSG00000171873 | GUAAACA |
| ENSG00000171877 | CUAGGCU |
| ENSG00000171877 | GGAGGAG |
| ENSG00000171877 | UCCCUUU |
| ENSG00000171885 | AAAGGUA |
| ENSG00000171885 | AGCACCA |

|                 |          |
|-----------------|----------|
| ENSG00000171885 | CAGUGCA  |
| ENSG00000171885 | CCUGCUG  |
| ENSG00000171885 | GAGAAGA  |
| ENSG00000171885 | GUCAUUG  |
| ENSG00000171885 | UCCUAG   |
| ENSG00000171914 | AGGAGCU  |
| ENSG00000171914 | AUAAUAC  |
| ENSG00000171914 | AUACAAG  |
| ENSG00000171914 | CCCCUGG  |
| ENSG00000171914 | CUGCCCC  |
| ENSG00000171914 | GCCCUUA  |
| ENSG00000171914 | GGAGUCC  |
| ENSG00000171914 | GGCAAGA  |
| ENSG00000171914 | GUAACAG  |
| ENSG00000171914 | GUGACAG  |
| ENSG00000171914 | GUGCAAA  |
| ENSG00000171914 | UCACAUU  |
| ENSG00000171928 | AGCAGCA  |
| ENSG00000171940 | AAAACUG  |
| ENSG00000171940 | AAAAGUA  |
| ENSG00000171940 | AAAGUGC  |
| ENSG00000171940 | AAGUGCA  |
| ENSG00000171940 | ACUGUAG  |
| ENSG00000171940 | AGCAGCG  |
| ENSG00000171940 | AGCUUUAU |
| ENSG00000171940 | AUGGCUU  |
| ENSG00000171940 | CAGCAGA  |
| ENSG00000171940 | CAGCAGG  |
| ENSG00000171940 | CAGUAGA  |
| ENSG00000171940 | CAGUGCA  |
| ENSG00000171940 | GACAACU  |
| ENSG00000171940 | GGAAUGU  |
| ENSG00000171940 | UAUAAUA  |
| ENSG00000171940 | UAUUGCU  |
| ENSG00000171940 | UCAAGUA  |
| ENSG00000171940 | UCCUGAG  |
| ENSG00000171940 | UGCAUAG  |
| ENSG00000171940 | UGCAUUAU |
| ENSG00000171940 | UGGUACC  |
| ENSG00000171940 | UUGGUCC  |
| ENSG00000171951 | AACAAAC  |
| ENSG00000171954 | CAGCAAA  |
| ENSG00000171954 | GAGGGGC  |
| ENSG00000171954 | GCGGGGC  |
| ENSG00000171954 | GGCGGGG  |
| ENSG00000171988 | AAAUUUC  |
| ENSG00000171988 | AACAAAC  |
| ENSG00000171988 | AACACUG  |
| ENSG00000171988 | ACAAUAU  |
| ENSG00000171988 | ACAUAGA  |
| ENSG00000171988 | AUAAAGU  |
| ENSG00000171988 | CACAGUG  |
| ENSG00000171988 | GCUGGUG  |
| ENSG00000171988 | GGCAGUG  |
| ENSG00000171988 | GUAACAG  |
| ENSG00000171988 | GUAGUGU  |
| ENSG00000171988 | UCACAGU  |
| ENSG00000171988 | UUGAUCA  |
| ENSG00000171988 | UUGGCAA  |
| ENSG00000171988 | UUGUGUC  |
| ENSG00000171992 | AAAAAUC  |
| ENSG00000171992 | AAAGGUA  |
| ENSG00000171992 | ACAAGGU  |
| ENSG00000171992 | CCUGCUG  |

|                 |         |
|-----------------|---------|
| ENSG00000171992 | CUGGGCA |
| ENSG00000171992 | GAAAACA |
| ENSG00000171992 | GCAGAAG |
| ENSG00000171992 | GCAGGUU |
| ENSG00000171992 | GGAGGCA |
| ENSG00000171992 | GGCAGUG |
| ENSG00000171992 | UCUCAAG |
| ENSG00000172007 | AUGGCUU |
| ENSG00000172007 | CUUUGGU |
| ENSG00000172007 | GUGCAA  |
| ENSG00000172007 | UCCCUUG |
| ENSG00000172007 | UCCCUUU |
| ENSG00000172007 | UGCAAAG |
| ENSG00000172007 | UCCUCG  |
| ENSG00000172020 | AAAGAGG |
| ENSG00000172020 | AACGGAA |
| ENSG00000172020 | ACACACU |
| ENSG00000172020 | AGUGCAA |
| ENSG00000172020 | AUUGCAC |
| ENSG00000172020 | CACUGUU |
| ENSG00000172020 | CCUGCUG |
| ENSG00000172053 | GAGGUAG |
| ENSG00000172057 | AAGUGCU |
| ENSG00000172057 | AAUACUG |
| ENSG00000172057 | ACUGUAG |
| ENSG00000172057 | AGUGCUU |
| ENSG00000172057 | CAGGCUC |
| ENSG00000172057 | CUCUGGG |
| ENSG00000172057 | GUCCAGA |
| ENSG00000172057 | UACAAAG |
| ENSG00000172057 | UCACACA |
| ENSG00000172057 | UCCAGAG |
| ENSG00000172059 | AAAGUGC |
| ENSG00000172059 | AAGUGCA |
| ENSG00000172059 | AGCAAAA |
| ENSG00000172059 | AGUGCAA |
| ENSG00000172059 | AUAAAGU |
| ENSG00000172059 | CCCUGUC |
| ENSG00000172059 | GUAAACA |
| ENSG00000172059 | UAUUGCU |
| ENSG00000172061 | CAGGAAC |
| ENSG00000172061 | CUCACAC |
| ENSG00000172061 | GGAGAGA |
| ENSG00000172061 | GUCCAGA |
| ENSG00000172061 | GUGACUG |
| ENSG00000172071 | AAAGUAC |
| ENSG00000172071 | ACACACU |
| ENSG00000172071 | AUGGAUU |
| ENSG00000172071 | CACCACC |
| ENSG00000172071 | UAGACUG |
| ENSG00000172071 | UGAAAGG |
| ENSG00000172081 | AGUGGUU |
| ENSG00000172113 | AAAGAGG |
| ENSG00000172113 | GAGAAGA |
| ENSG00000172113 | GAGGUAG |
| ENSG00000172115 | AACACUG |
| ENSG00000172115 | AAGGCAC |
| ENSG00000172115 | GGCAGUG |
| ENSG00000172115 | UUGGCAA |
| ENSG00000172137 | AUCAUAC |
| ENSG00000172137 | UCAUACA |
| ENSG00000172159 | GGCAUUG |
| ENSG00000172159 | UGUAUAA |
| ENSG00000172175 | CAAAGUG |

|                 |          |
|-----------------|----------|
| ENSG00000172175 | CUCAAAC  |
| ENSG00000172175 | UGCCAGC  |
| ENSG00000172175 | UUCAAAU  |
| ENSG00000172175 | UUCUUGU  |
| ENSG00000172197 | AAAACUG  |
| ENSG00000172197 | AACAAAC  |
| ENSG00000172197 | AAGGCAC  |
| ENSG00000172197 | AGGCAGG  |
| ENSG00000172197 | AGUGCUG  |
| ENSG00000172197 | CUCCAC   |
| ENSG00000172197 | GCACCAU  |
| ENSG00000172197 | GCAGAAG  |
| ENSG00000172197 | GGAGAGA  |
| ENSG00000172197 | GGCAGGG  |
| ENSG00000172197 | GGGGUGG  |
| ENSG00000172197 | UACAGUU  |
| ENSG00000172197 | UGGGGGA  |
| ENSG00000172197 | UUCUGCA  |
| ENSG00000172201 | AAAAAUC  |
| ENSG00000172201 | AAAGCUG  |
| ENSG00000172201 | ACAGUAC  |
| ENSG00000172201 | AGAUGUG  |
| ENSG00000172201 | AUACAAG  |
| ENSG00000172201 | AUGUAAU  |
| ENSG00000172201 | CUACAAA  |
| ENSG00000172201 | CUGGCUC  |
| ENSG00000172201 | GUAACAG  |
| ENSG00000172201 | UACAGUU  |
| ENSG00000172201 | UGAAAUG  |
| ENSG00000172201 | UUGGUCC  |
| ENSG00000172209 | GGCAGUG  |
| ENSG00000172216 | ACUCAGG  |
| ENSG00000172216 | CAGUUAC  |
| ENSG00000172239 | AUUGCAC  |
| ENSG00000172239 | CUACAAA  |
| ENSG00000172239 | UAUUGCU  |
| ENSG00000172239 | UGCAGCU  |
| ENSG00000172239 | UUGGCAA  |
| ENSG00000172239 | UUGGCAC  |
| ENSG00000172260 | AAAACUG  |
| ENSG00000172260 | AAAGCUG  |
| ENSG00000172260 | AACUCUA  |
| ENSG00000172260 | AAGUUGU  |
| ENSG00000172260 | ACAAUUAU |
| ENSG00000172260 | ACAGUAC  |
| ENSG00000172260 | AGAUAAA  |
| ENSG00000172260 | AGCACCA  |
| ENSG00000172260 | AUGCAUU  |
| ENSG00000172260 | AUUGCAC  |
| ENSG00000172260 | CCCACGU  |
| ENSG00000172260 | CUACAGU  |
| ENSG00000172260 | CUAGUAA  |
| ENSG00000172260 | CUCCCAA  |
| ENSG00000172260 | GACAACU  |
| ENSG00000172260 | GACCAUG  |
| ENSG00000172260 | GAGGUUAU |
| ENSG00000172260 | GAGUGUG  |
| ENSG00000172260 | GGAGUGU  |
| ENSG00000172260 | GGGUCUU  |
| ENSG00000172260 | GUAAACA  |
| ENSG00000172260 | GUCACUC  |
| ENSG00000172260 | GUCUACU  |
| ENSG00000172260 | GUGCCAC  |
| ENSG00000172260 | GUGUCAC  |

|                 |         |
|-----------------|---------|
| ENSG00000172260 | UCACACA |
| ENSG00000172260 | UGCAGCU |
| ENSG00000172260 | UGGAGAU |
| ENSG00000172260 | UUCUAAU |
| ENSG00000172260 | UUGGUUC |
| ENSG00000172262 | CUUUGGU |
| ENSG00000172264 | AAGGCAC |
| ENSG00000172264 | AAUCCUU |
| ENSG00000172264 | AGCUGCC |
| ENSG00000172264 | GGGUAAG |
| ENSG00000172264 | UAGAGGA |
| ENSG00000172264 | UAUAAAG |
| ENSG00000172264 | UGCAUUG |
| ENSG00000172292 | AAAGUGC |
| ENSG00000172292 | AACACUG |
| ENSG00000172292 | AAGUGCU |
| ENSG00000172292 | ACAGUAC |
| ENSG00000172292 | ACUAGAU |
| ENSG00000172292 | ACUGUUU |
| ENSG00000172292 | AUAAAGU |
| ENSG00000172292 | AUGGCAC |
| ENSG00000172292 | CAGACAG |
| ENSG00000172292 | CAGUGCA |
| ENSG00000172292 | CUUUGGU |
| ENSG00000172292 | GUGUCAC |
| ENSG00000172292 | UCACAGG |
| ENSG00000172292 | UCACAGU |
| ENSG00000172292 | UCAUUCG |
| ENSG00000172292 | UUAUGCA |
| ENSG00000172292 | UUGGCAA |
| ENSG00000172292 | UUGUGUC |
| ENSG00000172296 | CAGUGCA |
| ENSG00000172296 | CUGGGCA |
| ENSG00000172340 | AAGGCAC |
| ENSG00000172340 | GAGGUAG |
| ENSG00000172340 | GAGUAU  |
| ENSG00000172346 | CACAGUG |
| ENSG00000172346 | CAGACAG |
| ENSG00000172346 | CCAGUGU |
| ENSG00000172346 | UAUUGCU |
| ENSG00000172346 | UCACAGU |
| ENSG00000172346 | UGCCAGC |
| ENSG00000172348 | AUACAAG |
| ENSG00000172348 | CUUUGGU |
| ENSG00000172348 | GCAGAAG |
| ENSG00000172348 | GGAAUGU |
| ENSG00000172348 | UACAAAG |
| ENSG00000172348 | UAUUGCU |
| ENSG00000172348 | UCACCAC |
| ENSG00000172348 | UGCAUAG |
| ENSG00000172348 | UGCAUAU |
| ENSG00000172349 | GAAGGUC |
| ENSG00000172349 | GACCCUG |
| ENSG00000172349 | UGAGAAU |
| ENSG00000172350 | AAAGUGC |
| ENSG00000172350 | AAAUCCC |
| ENSG00000172350 | AACAGUC |
| ENSG00000172350 | AAGUGCA |
| ENSG00000172350 | ACUGUAG |
| ENSG00000172350 | AGCAGCA |
| ENSG00000172350 | AUAAAGU |
| ENSG00000172350 | AUUGCAC |
| ENSG00000172350 | CUCCAGC |
| ENSG00000172350 | CUGGGGG |

|                 |          |
|-----------------|----------|
| ENSG00000172350 | CUUGUGU  |
| ENSG00000172350 | CUUUGGU  |
| ENSG00000172350 | GACUUCC  |
| ENSG00000172350 | GCCUGU   |
| ENSG00000172350 | GUCUGCC  |
| ENSG00000172350 | GUGCCUG  |
| ENSG00000172350 | GUGUGGC  |
| ENSG00000172350 | UACAAAG  |
| ENSG00000172350 | UAUUGCU  |
| ENSG00000172350 | UCCAGAG  |
| ENSG00000172350 | UCCAGUU  |
| ENSG00000172350 | UCUCCAA  |
| ENSG00000172350 | UGUGCUU  |
| ENSG00000172350 | UGUGUGG  |
| ENSG00000172350 | UUGGUCC  |
| ENSG00000172354 | GUAGUGU  |
| ENSG00000172375 | CUGCCCC  |
| ENSG00000172375 | GAGCUGC  |
| ENSG00000172375 | GGAGAGA  |
| ENSG00000172375 | UCAAGUA  |
| ENSG00000172375 | UCACACA  |
| ENSG00000172375 | UGGGACA  |
| ENSG00000172379 | ACAAUUAU |
| ENSG00000172379 | ACAUUAC  |
| ENSG00000172379 | CAGUUAC  |
| ENSG00000172379 | UCUAGAG  |
| ENSG00000172380 | AAAAAUC  |
| ENSG00000172380 | AAGUGCU  |
| ENSG00000172380 | AGCAGCU  |
| ENSG00000172380 | AGGAGCU  |
| ENSG00000172380 | AGUGGUU  |
| ENSG00000172380 | CACAGUG  |
| ENSG00000172380 | CCAGCAU  |
| ENSG00000172380 | GAGCUGC  |
| ENSG00000172380 | GCUGGAU  |
| ENSG00000172382 | UACAAAG  |
| ENSG00000172399 | UGCCAGC  |
| ENSG00000172399 | UUCAAAU  |
| ENSG00000172403 | AGCAGCU  |
| ENSG00000172403 | UCACAUU  |
| ENSG00000172403 | UGAGUCU  |
| ENSG00000172404 | UAAUGCU  |
| ENSG00000172404 | UCACCAC  |
| ENSG00000172404 | UUCAAAU  |
| ENSG00000172432 | AAAGCUG  |
| ENSG00000172432 | AAAUCCC  |
| ENSG00000172432 | AACAAAC  |
| ENSG00000172432 | AAGUCAC  |
| ENSG00000172432 | AGCACCA  |
| ENSG00000172432 | GAGAAGA  |
| ENSG00000172432 | GAGGUAU  |
| ENSG00000172432 | GGGAACG  |
| ENSG00000172432 | GUGGGGA  |
| ENSG00000172432 | UCCCUUU  |
| ENSG00000172432 | UGAUCCA  |
| ENSG00000172432 | UGCAGCU  |
| ENSG00000172432 | UUCCUCG  |
| ENSG00000172458 | GCCCUUA  |
| ENSG00000172458 | UUCAAAU  |
| ENSG00000172461 | AAAGAAU  |
| ENSG00000172461 | AGCCCUU  |
| ENSG00000172461 | CACAAUG  |
| ENSG00000172461 | CACAGUG  |
| ENSG00000172461 | CAGUAGU  |

|                 |         |
|-----------------|---------|
| ENSG00000172461 | CAGUGCA |
| ENSG00000172461 | GGCAUUG |
| ENSG00000172461 | GUGCAAA |
| ENSG00000172461 | GUGCUUG |
| ENSG00000172461 | UCACAGU |
| ENSG00000172461 | UCCAGUU |
| ENSG00000172461 | UUGGCAA |
| ENSG00000172461 | UUGGCAC |
| ENSG00000172466 | CACAGUG |
| ENSG00000172466 | GGAAUGU |
| ENSG00000172466 | UCAUUUG |
| ENSG00000172469 | GAGAAAU |
| ENSG00000172493 | AACACUG |
| ENSG00000172493 | AAGUGCA |
| ENSG00000172493 | AAUACUG |
| ENSG00000172493 | ACAUUCA |
| ENSG00000172493 | CUCAGGG |
| ENSG00000172493 | CUGCUCA |
| ENSG00000172493 | CUUUGGU |
| ENSG00000172493 | GAGGCUG |
| ENSG00000172493 | GAGUUGG |
| ENSG00000172493 | GCUGGUG |
| ENSG00000172493 | GUAACAG |
| ENSG00000172493 | GUAGUGU |
| ENSG00000172493 | UCACAUU |
| ENSG00000172493 | UCUAGAG |
| ENSG00000172493 | UGCAUAG |
| ENSG00000172497 | ACUGCAU |
| ENSG00000172530 | AAAAGUA |
| ENSG00000172530 | AGCAAAA |
| ENSG00000172530 | CAGCAAA |
| ENSG00000172530 | UAUAAAG |
| ENSG00000172530 | UCUUGAG |
| ENSG00000172530 | UUUUUGC |
| ENSG00000172531 | CCCUGAG |
| ENSG00000172531 | CUGCAGC |
| ENSG00000172531 | GAGCUGC |
| ENSG00000172531 | UGCCUG  |
| ENSG00000172534 | AAAAACC |
| ENSG00000172534 | CUACAAA |
| ENSG00000172534 | GCAGCAU |
| ENSG00000172534 | GUGCUUG |
| ENSG00000172534 | UAAUACA |
| ENSG00000172534 | UAUAAUA |
| ENSG00000172534 | UCCUGAG |
| ENSG00000172534 | UCUGGAG |
| ENSG00000172534 | UGAGUCU |
| ENSG00000172534 | UGUGCUU |
| ENSG00000172534 | UUCAAAU |
| ENSG00000172572 | UCACAGU |
| ENSG00000172572 | UGUGCUU |
| ENSG00000172572 | UGUGUCA |
| ENSG00000172572 | UUGUGUC |
| ENSG00000172575 | AUCAUAC |
| ENSG00000172575 | GAGGUAU |
| ENSG00000172575 | UCACAAG |
| ENSG00000172575 | UGUCUUU |
| ENSG00000172578 | AGUGCCU |
| ENSG00000172578 | AUGAUGA |
| ENSG00000172578 | CAGUUAC |
| ENSG00000172578 | CCAGUGC |
| ENSG00000172578 | CCAGUGU |
| ENSG00000172578 | GAGGUAG |
| ENSG00000172578 | GAGGUAU |

|                 |         |
|-----------------|---------|
| ENSG00000172578 | GUGCCUG |
| ENSG00000172578 | UCCAGUU |
| ENSG00000172578 | UCCCUGU |
| ENSG00000172578 | UCCUGAG |
| ENSG00000172590 | AAAACUG |
| ENSG00000172590 | GGCAGUG |
| ENSG00000172613 | AAAGCUG |
| ENSG00000172613 | AAAGGUA |
| ENSG00000172613 | CAAAGCA |
| ENSG00000172613 | CCCCCAG |
| ENSG00000172613 | CUCAGGG |
| ENSG00000172613 | CUGCAGC |
| ENSG00000172613 | GCUGGAU |
| ENSG00000172613 | GGCAGCG |
| ENSG00000172613 | UCAUGAU |
| ENSG00000172613 | UGCAGCU |
| ENSG00000172638 | CCCACCU |
| ENSG00000172638 | UCCCUUU |
| ENSG00000172660 | AGCAGCA |
| ENSG00000172660 | AUUGCAC |
| ENSG00000172660 | CAGCAGG |
| ENSG00000172660 | CCCACCG |
| ENSG00000172660 | CCCACCU |
| ENSG00000172660 | CUCCAC  |
| ENSG00000172660 | UACAAAG |
| ENSG00000172660 | UAUUGCU |
| ENSG00000172660 | UCCCACC |
| ENSG00000172660 | UUGGCAC |
| ENSG00000172661 | ACCCUGU |
| ENSG00000172661 | GCAGAAG |
| ENSG00000172663 | UCCUGAG |
| ENSG00000172667 | AGAUAAA |
| ENSG00000172667 | AGGCAGG |
| ENSG00000172667 | CAAAGCA |
| ENSG00000172667 | GGAAUGU |
| ENSG00000172667 | UGGUACC |
| ENSG00000172728 | GUCAACA |
| ENSG00000172728 | UUCUAAU |
| ENSG00000172731 | AGGGAGG |
| ENSG00000172731 | AUUGCAC |
| ENSG00000172731 | CUCUGGG |
| ENSG00000172731 | GAGGUAG |
| ENSG00000172731 | UAUUGCU |
| ENSG00000172733 | UGUGCUU |
| ENSG00000172738 | GAGAAGA |
| ENSG00000172752 | CAAAGCA |
| ENSG00000172757 | AACAUUC |
| ENSG00000172757 | AGCCUGC |
| ENSG00000172757 | CCCCCAG |
| ENSG00000172757 | CCUGCUG |
| ENSG00000172757 | GAAGGUC |
| ENSG00000172757 | GGCAGCG |
| ENSG00000172757 | GGCAGGG |
| ENSG00000172757 | GGGGCAG |
| ENSG00000172757 | UUGGCAA |
| ENSG00000172757 | UUGGCAC |
| ENSG00000172765 | AAAGCUG |
| ENSG00000172765 | AAGUGCU |
| ENSG00000172765 | AAUACUG |
| ENSG00000172765 | ACAGUAC |
| ENSG00000172765 | ACAGUAU |
| ENSG00000172765 | ACAUCAC |
| ENSG00000172765 | AGCAGCG |
| ENSG00000172765 | AGUGCUG |



|                 |          |
|-----------------|----------|
| ENSG00000172765 | AUUGCAC  |
| ENSG00000172765 | CACAGUG  |
| ENSG00000172765 | CUACAGU  |
| ENSG00000172765 | CUAUACA  |
| ENSG00000172765 | CUUGGAG  |
| ENSG00000172765 | CUUUGGU  |
| ENSG00000172765 | GUCAUUG  |
| ENSG00000172765 | UCACAGG  |
| ENSG00000172765 | UGAUCCA  |
| ENSG00000172765 | UUCAAAU  |
| ENSG00000172765 | UUCAAGC  |
| ENSG00000172780 | AAGGCAC  |
| ENSG00000172780 | CAA AUGC |
| ENSG00000172780 | GCAACUU  |
| ENSG00000172780 | GGCAGUG  |
| ENSG00000172780 | UAUAAAG  |
| ENSG00000172780 | UUUGCAA  |
| ENSG00000172782 | CCAGUGU  |
| ENSG00000172782 | GUCUUGC  |
| ENSG00000172789 | AUGACAC  |
| ENSG00000172789 | CAGGAAC  |
| ENSG00000172789 | GAUAUGU  |
| ENSG00000172794 | AAGUGCA  |
| ENSG00000172794 | CCCCUGG  |
| ENSG00000172794 | GUCCAGA  |
| ENSG00000172794 | UCCAGAG  |
| ENSG00000172794 | UGGGACA  |
| ENSG00000172795 | AUGCAUU  |
| ENSG00000172795 | AUGGCUU  |
| ENSG00000172795 | AUUGCAC  |
| ENSG00000172795 | CAAAGCA  |
| ENSG00000172795 | CACAGUG  |
| ENSG00000172795 | CAGUAGU  |
| ENSG00000172795 | CUACAAA  |
| ENSG00000172795 | CUCAGGG  |
| ENSG00000172795 | CUUACAG  |
| ENSG00000172795 | CUUUGGU  |
| ENSG00000172795 | GAAUUGU  |
| ENSG00000172795 | GAUUGUA  |
| ENSG00000172795 | GAUUGUC  |
| ENSG00000172795 | GGAAUGU  |
| ENSG00000172795 | GGAGGCA  |
| ENSG00000172795 | GUAAACA  |
| ENSG00000172795 | GUGCUUG  |
| ENSG00000172795 | UACAGUU  |
| ENSG00000172795 | UCUGGAA  |
| ENSG00000172795 | UGCAUAG  |
| ENSG00000172795 | UGCAU AU |
| ENSG00000172795 | UGUGCUU  |
| ENSG00000172795 | UUGGUUC  |
| ENSG00000172803 | GCCCUGU  |
| ENSG00000172818 | AUAUUAU  |
| ENSG00000172818 | CCCUGAG  |
| ENSG00000172818 | GAUAUGU  |
| ENSG00000172818 | GCCCUGU  |
| ENSG00000172818 | UGAAAUG  |
| ENSG00000172818 | UUUUUGC  |
| ENSG00000172819 | AAGGCAC  |
| ENSG00000172819 | ACUCAGC  |
| ENSG00000172819 | AGGAGCU  |
| ENSG00000172819 | CAGUCUG  |
| ENSG00000172819 | CCCCUGG  |
| ENSG00000172819 | CUCUGGG  |
| ENSG00000172819 | GAGAUGA  |

|                 |          |
|-----------------|----------|
| ENSG00000172819 | GCUUCCU  |
| ENSG00000172819 | GGAGGAG  |
| ENSG00000172819 | GGCAGCG  |
| ENSG00000172819 | GGCCUG   |
| ENSG00000172819 | GGCUCAG  |
| ENSG00000172819 | GUAGUGU  |
| ENSG00000172819 | UGCAAAG  |
| ENSG00000172819 | UUUGCAC  |
| ENSG00000172828 | CUAGGCU  |
| ENSG00000172830 | AGCCCUU  |
| ENSG00000172830 | GAGCCCC  |
| ENSG00000172830 | UACAAAG  |
| ENSG00000172830 | UCUUGAG  |
| ENSG00000172831 | GUGAAUG  |
| ENSG00000172840 | GAGGUAG  |
| ENSG00000172840 | GUAAACA  |
| ENSG00000172840 | UCCAUA   |
| ENSG00000172845 | AAAAGUA  |
| ENSG00000172845 | AAAGUAA  |
| ENSG00000172845 | AAAGUAC  |
| ENSG00000172845 | AAGAACC  |
| ENSG00000172845 | AAGACAU  |
| ENSG00000172845 | AAGGCAC  |
| ENSG00000172845 | ACCACAG  |
| ENSG00000172845 | CAA AUGC |
| ENSG00000172845 | CAGUAC   |
| ENSG00000172845 | CUACAAA  |
| ENSG00000172845 | GGCCUG   |
| ENSG00000172845 | UAAUGCU  |
| ENSG00000172845 | UAGACUG  |
| ENSG00000172845 | UCAUACA  |
| ENSG00000172845 | UCCAGUU  |
| ENSG00000172845 | UCUCACC  |
| ENSG00000172845 | UUAUGCA  |
| ENSG00000172845 | UUGGCAC  |
| ENSG00000172867 | UGCAAAG  |
| ENSG00000172869 | AAGGCAC  |
| ENSG00000172869 | AGCCCUU  |
| ENSG00000172869 | AGGUUAU  |
| ENSG00000172869 | GAUUGUA  |
| ENSG00000172869 | GAUUGUC  |
| ENSG00000172869 | GCAACUU  |
| ENSG00000172869 | GCUGUCU  |
| ENSG00000172869 | UAUUGCU  |
| ENSG00000172869 | UCAAGUA  |
| ENSG00000172869 | UCCUGAG  |
| ENSG00000172901 | AAAGAAU  |
| ENSG00000172915 | AAAAGUA  |
| ENSG00000172915 | AAAGAGG  |
| ENSG00000172915 | AAUCACU  |
| ENSG00000172915 | ACAUUCA  |
| ENSG00000172915 | AGCCCUU  |
| ENSG00000172915 | AGCUUAU  |
| ENSG00000172915 | AUGGCUU  |
| ENSG00000172915 | CAAAGUG  |
| ENSG00000172915 | CAA AUGC |
| ENSG00000172915 | CAGCUGG  |
| ENSG00000172915 | CCCCUGG  |
| ENSG00000172915 | CUACAAA  |
| ENSG00000172915 | CUGGAAA  |
| ENSG00000172915 | GAGGCUG  |
| ENSG00000172915 | GAGUGUG  |
| ENSG00000172915 | GCUGGUG  |
| ENSG00000172915 | GGUUACC  |

|                 |          |
|-----------------|----------|
| ENSG00000172915 | UCACACA  |
| ENSG00000172915 | UGCAAAG  |
| ENSG00000172915 | UGCAUAG  |
| ENSG00000172915 | UGUGCUU  |
| ENSG00000172915 | UUUGCAA  |
| ENSG00000172932 | UAUAAAAG |
| ENSG00000172936 | CAGACAG  |
| ENSG00000172936 | GACCAUG  |
| ENSG00000172936 | GGAGGAG  |
| ENSG00000172936 | GGAGGCA  |
| ENSG00000172939 | AAAGCUG  |
| ENSG00000172939 | AACGGAA  |
| ENSG00000172939 | AAGGCAC  |
| ENSG00000172939 | AUUGCAC  |
| ENSG00000172939 | CACCAGC  |
| ENSG00000172939 | CAGUAGU  |
| ENSG00000172939 | CAGUGCA  |
| ENSG00000172939 | CAUAUUG  |
| ENSG00000172939 | CUCUUCC  |
| ENSG00000172939 | CUUUGGU  |
| ENSG00000172939 | GCAGGAC  |
| ENSG00000172939 | GCUAGCA  |
| ENSG00000172939 | GGCAAGA  |
| ENSG00000172939 | GGCAGUG  |
| ENSG00000172939 | GGGGUGC  |
| ENSG00000172939 | GUCUACU  |
| ENSG00000172939 | GUGCCUG  |
| ENSG00000172939 | GUGCUUG  |
| ENSG00000172939 | UAUUGCU  |
| ENSG00000172939 | UCUGGAG  |
| ENSG00000172939 | UGCAUUG  |
| ENSG00000172939 | UGGCCAC  |
| ENSG00000172939 | UGUGUGG  |
| ENSG00000172939 | UUGGCAA  |
| ENSG00000172939 | UUUGCAC  |
| ENSG00000172940 | GAAGGAA  |
| ENSG00000172943 | AAAGCUG  |
| ENSG00000172943 | AAUCACU  |
| ENSG00000172943 | ACAUUAC  |
| ENSG00000172943 | ACUAGAU  |
| ENSG00000172943 | AGAUAAA  |
| ENSG00000172943 | AGCCAGU  |
| ENSG00000172943 | AGGGAGG  |
| ENSG00000172943 | AUAUUAU  |
| ENSG00000172943 | AUGAUGC  |
| ENSG00000172943 | CACAAUG  |
| ENSG00000172943 | GAGGUAG  |
| ENSG00000172943 | GCAGGAC  |
| ENSG00000172943 | GGCAAGA  |
| ENSG00000172943 | GGCCUG   |
| ENSG00000172943 | GGGUCC   |
| ENSG00000172943 | GGGUUUA  |
| ENSG00000172943 | GUGACUG  |
| ENSG00000172943 | UAUAAAAG |
| ENSG00000172943 | UCCCUGU  |
| ENSG00000172943 | UUGGCAA  |
| ENSG00000172977 | AGCUGCC  |
| ENSG00000172977 | UAUUGCU  |
| ENSG00000172985 | AAAGUAC  |
| ENSG00000172985 | AACAAAC  |
| ENSG00000172985 | AAGGCAC  |
| ENSG00000172985 | AGCACCA  |
| ENSG00000172985 | AUAUAAC  |
| ENSG00000172985 | GAGGUAG  |

|                 |         |
|-----------------|---------|
| ENSG00000172985 | UAUAAAG |
| ENSG00000172985 | UCUGGAA |
| ENSG00000172985 | UGACCUA |
| ENSG00000172985 | UGCAAAG |
| ENSG00000172986 | GCACCAU |
| ENSG00000172992 | AAGGCAC |
| ENSG00000172992 | GAGAUGA |
| ENSG00000173020 | CACAAUG |
| ENSG00000173020 | CAGCAGG |
| ENSG00000173020 | CCCUGAG |
| ENSG00000173020 | GAAAACA |
| ENSG00000173020 | GAGGCAG |
| ENSG00000173020 | GGAGGCA |
| ENSG00000173020 | GGGCCCC |
| ENSG00000173020 | GGUGGGC |
| ENSG00000173020 | UACAAAG |
| ENSG00000173020 | UAGAGGA |
| ENSG00000173020 | UAUAAAG |
| ENSG00000173020 | UCACAUU |
| ENSG00000173020 | UCCGCUC |
| ENSG00000173064 | AAAGUAC |
| ENSG00000173064 | AAGAACC |
| ENSG00000173064 | AAGUCUU |
| ENSG00000173064 | AGCAGCG |
| ENSG00000173064 | AGCAGCU |
| ENSG00000173064 | AUACAAG |
| ENSG00000173064 | CACAAUG |
| ENSG00000173064 | CAGCAA  |
| ENSG00000173064 | CCAGGAG |
| ENSG00000173064 | CUACAAA |
| ENSG00000173064 | GAAGGUC |
| ENSG00000173064 | GAGGUAG |
| ENSG00000173064 | GGAGGAG |
| ENSG00000173064 | GUGUGGC |
| ENSG00000173064 | UCAAGUA |
| ENSG00000173064 | UCACAAG |
| ENSG00000173065 | AACUGGU |
| ENSG00000173065 | AAGGCAC |
| ENSG00000173065 | ACAGUAC |
| ENSG00000173065 | ACAUUCA |
| ENSG00000173065 | ACCACAG |
| ENSG00000173065 | ACUCAA  |
| ENSG00000173065 | AGCCAGU |
| ENSG00000173065 | AUCACUA |
| ENSG00000173065 | CAAUUGC |
| ENSG00000173065 | CACAGUG |
| ENSG00000173065 | CAGGUGA |
| ENSG00000173065 | CUACAGU |
| ENSG00000173065 | CUCAAAC |
| ENSG00000173065 | CUGGCUC |
| ENSG00000173065 | CUUACAG |
| ENSG00000173065 | GAGAACC |
| ENSG00000173065 | GCAACUU |
| ENSG00000173065 | GCUACAU |
| ENSG00000173065 | GUGGGGA |
| ENSG00000173065 | UACAGUU |
| ENSG00000173065 | UAUUGCU |
| ENSG00000173065 | UCACACA |
| ENSG00000173065 | UCACAGU |
| ENSG00000173065 | UCACAUU |
| ENSG00000173065 | UCAUACA |
| ENSG00000173065 | UCAUUUG |
| ENSG00000173065 | UUGGCAA |
| ENSG00000173065 | UUGGCAC |

|                 |          |
|-----------------|----------|
| ENSG00000173065 | UUGUGUC  |
| ENSG00000173068 | AAAAACC  |
| ENSG00000173068 | AAAGGUA  |
| ENSG00000173068 | AACAUUC  |
| ENSG00000173068 | AACGGAA  |
| ENSG00000173068 | AAGACAU  |
| ENSG00000173068 | AAGUAGC  |
| ENSG00000173068 | AAGUGCA  |
| ENSG00000173068 | AAGUGCU  |
| ENSG00000173068 | AAUGUUG  |
| ENSG00000173068 | ACAAUUAU |
| ENSG00000173068 | ACAUUAC  |
| ENSG00000173068 | ACAUUCA  |
| ENSG00000173068 | ACUGGAU  |
| ENSG00000173068 | ACUGUGU  |
| ENSG00000173068 | AGAUAAA  |
| ENSG00000173068 | AGCCAGU  |
| ENSG00000173068 | AGCUUAU  |
| ENSG00000173068 | AGGUAGU  |
| ENSG00000173068 | AGUGCUG  |
| ENSG00000173068 | AGUGUGC  |
| ENSG00000173068 | AUAAAGU  |
| ENSG00000173068 | AUAUAAC  |
| ENSG00000173068 | AUAUUAU  |
| ENSG00000173068 | AUGACAC  |
| ENSG00000173068 | AUGAUGC  |
| ENSG00000173068 | AUGCCUU  |
| ENSG00000173068 | AUGGCAC  |
| ENSG00000173068 | CAAGAGC  |
| ENSG00000173068 | CACACCG  |
| ENSG00000173068 | CACACCU  |
| ENSG00000173068 | CAGCAGA  |
| ENSG00000173068 | CAGCAGG  |
| ENSG00000173068 | CCAGGAG  |
| ENSG00000173068 | CUGCUCA  |
| ENSG00000173068 | CUUUGGU  |
| ENSG00000173068 | GAAACAU  |
| ENSG00000173068 | GAGAAGA  |
| ENSG00000173068 | GAGGCUG  |
| ENSG00000173068 | GAGGUAG  |
| ENSG00000173068 | GCUGGAU  |
| ENSG00000173068 | GGAAGCC  |
| ENSG00000173068 | GGCAUUG  |
| ENSG00000173068 | GGGUGUU  |
| ENSG00000173068 | GUAAACA  |
| ENSG00000173068 | GUCUGCC  |
| ENSG00000173068 | GUGAAUG  |
| ENSG00000173068 | GUGACAG  |
| ENSG00000173068 | GUGGGGA  |
| ENSG00000173068 | UAAGACG  |
| ENSG00000173068 | UAAGACU  |
| ENSG00000173068 | UCACACA  |
| ENSG00000173068 | UCACAUU  |
| ENSG00000173068 | UGAAAGG  |
| ENSG00000173068 | UGAAGCU  |
| ENSG00000173068 | UGCAUAU  |
| ENSG00000173068 | UGCCAGC  |
| ENSG00000173068 | UGGCUGC  |
| ENSG00000173068 | UGUCUGC  |
| ENSG00000173068 | UGUCUGG  |
| ENSG00000173068 | UGUGUCA  |
| ENSG00000173068 | UUGAUCA  |
| ENSG00000173068 | UUGGAGG  |
| ENSG00000173068 | UUGGCAC  |

|                 |          |
|-----------------|----------|
| ENSG00000173068 | UUGUGUC  |
| ENSG00000173068 | UUGUUCG  |
| ENSG00000173068 | UUUGCAC  |
| ENSG00000173068 | UUUUUGC  |
| ENSG00000173077 | AAGUCUU  |
| ENSG00000173077 | UUCCUCG  |
| ENSG00000173114 | ACUGUGU  |
| ENSG00000173114 | CUACAGU  |
| ENSG00000173114 | GAGGUAU  |
| ENSG00000173114 | GGAGGAG  |
| ENSG00000173114 | UAUUGCU  |
| ENSG00000173114 | UUGGUUC  |
| ENSG00000173124 | GGAGGCA  |
| ENSG00000173153 | AGCAAAA  |
| ENSG00000173153 | AGCAGCA  |
| ENSG00000173153 | CAGCAGG  |
| ENSG00000173153 | CUCUGGG  |
| ENSG00000173153 | CUGCAGC  |
| ENSG00000173153 | CUGCAGG  |
| ENSG00000173153 | CUGGGGG  |
| ENSG00000173153 | CUUGGAG  |
| ENSG00000173153 | GAGGCAG  |
| ENSG00000173153 | GGCAGUG  |
| ENSG00000173153 | GGCAUUG  |
| ENSG00000173153 | GGCCUG   |
| ENSG00000173153 | GGGAGCU  |
| ENSG00000173153 | GGGGCAG  |
| ENSG00000173153 | GGGGUCC  |
| ENSG00000173153 | GUCUCUG  |
| ENSG00000173153 | UCCCUCU  |
| ENSG00000173153 | UGCCAGC  |
| ENSG00000173153 | UGCCUG   |
| ENSG00000173153 | UGGCCAC  |
| ENSG00000173166 | AGCACCA  |
| ENSG00000173166 | AGUGCUG  |
| ENSG00000173166 | AUGGCAC  |
| ENSG00000173166 | CAGUAGA  |
| ENSG00000173166 | CCAGCAU  |
| ENSG00000173166 | CCAUUAC  |
| ENSG00000173166 | CUGCAGG  |
| ENSG00000173166 | GGCAGUG  |
| ENSG00000173166 | GUAAACA  |
| ENSG00000173166 | GUGCAAA  |
| ENSG00000173166 | GUUAAUG  |
| ENSG00000173166 | UAUUGCU  |
| ENSG00000173166 | UCCACA   |
| ENSG00000173166 | UGGAGAU  |
| ENSG00000173166 | UGUCUUU  |
| ENSG00000173166 | UUCUGCA  |
| ENSG00000173171 | GGAAUGU  |
| ENSG00000173171 | UCUGGAA  |
| ENSG00000173207 | CAAAGCA  |
| ENSG00000173208 | AGCUUUAU |
| ENSG00000173208 | AGUAGUU  |
| ENSG00000173209 | AAAAGUA  |
| ENSG00000173210 | AAAAAUC  |
| ENSG00000173210 | AAAUCCC  |
| ENSG00000173210 | ACAGUAC  |
| ENSG00000173210 | ACAUAGA  |
| ENSG00000173210 | AGCCCUU  |
| ENSG00000173210 | AUAUAAC  |
| ENSG00000173210 | AUCCCUU  |
| ENSG00000173210 | GAGUUGG  |
| ENSG00000173210 | GAUUGUA  |

|                 |          |
|-----------------|----------|
| ENSG00000173210 | GGCAGGG  |
| ENSG00000173214 | UCUCCAA  |
| ENSG00000173218 | AAGGCAC  |
| ENSG00000173218 | AGAUAAA  |
| ENSG00000173218 | AGCCAGU  |
| ENSG00000173218 | AGUGAUC  |
| ENSG00000173218 | AGUGCAA  |
| ENSG00000173218 | AUAAAGU  |
| ENSG00000173218 | AUGGCAC  |
| ENSG00000173218 | AUUCAUU  |
| ENSG00000173218 | CAGUAGU  |
| ENSG00000173218 | CAGUGCA  |
| ENSG00000173218 | CCUGCUG  |
| ENSG00000173218 | CCUUCUU  |
| ENSG00000173218 | CUUCACC  |
| ENSG00000173218 | GAGAAAU  |
| ENSG00000173218 | GCACCAU  |
| ENSG00000173218 | GCUGGUG  |
| ENSG00000173218 | GGCAGGG  |
| ENSG00000173218 | GGUGGUC  |
| ENSG00000173218 | GUAAACA  |
| ENSG00000173218 | GUGCAAA  |
| ENSG00000173218 | UCCAGUU  |
| ENSG00000173218 | UCCCACA  |
| ENSG00000173218 | UCCCACC  |
| ENSG00000173218 | UGCAAAG  |
| ENSG00000173218 | UUGGUUC  |
| ENSG00000173218 | UUUUUGC  |
| ENSG00000173221 | GAGGUAG  |
| ENSG00000173226 | GAGGUAG  |
| ENSG00000173230 | GAGAAAU  |
| ENSG00000173262 | AGAUAAA  |
| ENSG00000173262 | AGCAGCG  |
| ENSG00000173262 | AGCAGCU  |
| ENSG00000173264 | CUGGCUC  |
| ENSG00000173264 | GAGGUAG  |
| ENSG00000173273 | AAAAGUA  |
| ENSG00000173273 | AAAGCUG  |
| ENSG00000173273 | AAAGUAA  |
| ENSG00000173273 | AAAGUAC  |
| ENSG00000173273 | AAGGCAC  |
| ENSG00000173273 | AAGUGCA  |
| ENSG00000173273 | ACUCAA   |
| ENSG00000173273 | AGCUUUAU |
| ENSG00000173273 | AGGCAGG  |
| ENSG00000173273 | AGUGUGC  |
| ENSG00000173273 | AUUCAUU  |
| ENSG00000173273 | CAAAGUG  |
| ENSG00000173273 | CUUUGGU  |
| ENSG00000173273 | GAGUAUU  |
| ENSG00000173273 | GAUAUGU  |
| ENSG00000173273 | GGCAGUG  |
| ENSG00000173273 | GGCUCAG  |
| ENSG00000173273 | UUCAAA   |
| ENSG00000173273 | UUCUCG   |
| ENSG00000173273 | UUGGUUC  |
| ENSG00000173273 | UUUCAAC  |
| ENSG00000173275 | AAAGAAU  |
| ENSG00000173275 | CCAUUAC  |
| ENSG00000173275 | GCAGCAU  |
| ENSG00000173276 | AAAAGUA  |
| ENSG00000173276 | AACAAAC  |
| ENSG00000173276 | GGAAGCC  |
| ENSG00000173276 | GGAAUGU  |

|                 |          |
|-----------------|----------|
| ENSG00000173276 | UGCAUAG  |
| ENSG00000173276 | UGCUGAC  |
| ENSG00000173281 | AAGUGCA  |
| ENSG00000173281 | AGCAAAA  |
| ENSG00000173281 | AUCCUUU  |
| ENSG00000173281 | CAGCAAA  |
| ENSG00000173281 | GGAAUGU  |
| ENSG00000173281 | UAUUACC  |
| ENSG00000173281 | UCACAGG  |
| ENSG00000173320 | AAAACUG  |
| ENSG00000173320 | AAACUGU  |
| ENSG00000173327 | AAAGUGC  |
| ENSG00000173327 | AAGUGCU  |
| ENSG00000173327 | AGUGCUG  |
| ENSG00000173327 | CCAGUGC  |
| ENSG00000173327 | GGGGUCC  |
| ENSG00000173327 | GUAGUGU  |
| ENSG00000173327 | GUGACAG  |
| ENSG00000173327 | UCCAGUU  |
| ENSG00000173334 | AAAGUAC  |
| ENSG00000173334 | AAGUCAC  |
| ENSG00000173334 | ACCCGUA  |
| ENSG00000173334 | GAGGUAG  |
| ENSG00000173334 | GUGAGGU  |
| ENSG00000173334 | UACAAAG  |
| ENSG00000173334 | UCUCACC  |
| ENSG00000173338 | GCUUCCU  |
| ENSG00000173349 | GAGGUAG  |
| ENSG00000173376 | GUUCAUG  |
| ENSG00000173376 | UAUAAAAG |
| ENSG00000173391 | GAGGUAG  |
| ENSG00000173391 | GAGGUAU  |
| ENSG00000173391 | UCUGGAG  |
| ENSG00000173402 | ACAGUAC  |
| ENSG00000173402 | AUGGCUU  |
| ENSG00000173402 | CUGCCCC  |
| ENSG00000173402 | GAAAACA  |
| ENSG00000173402 | GUGCAAA  |
| ENSG00000173402 | UACAGUU  |
| ENSG00000173402 | UAUUGCU  |
| ENSG00000173402 | UCCAGUU  |
| ENSG00000173404 | AAAGCUG  |
| ENSG00000173404 | AAAGUAA  |
| ENSG00000173404 | CACAGUG  |
| ENSG00000173404 | UCACAAG  |
| ENSG00000173436 | AACAUUC  |
| ENSG00000173436 | GCUGGAU  |
| ENSG00000173436 | GGAAGCC  |
| ENSG00000173436 | GGCAGUG  |
| ENSG00000173436 | UAAGACG  |
| ENSG00000173436 | UAAGACU  |
| ENSG00000173442 | UAUUGCU  |
| ENSG00000173451 | AAAACUG  |
| ENSG00000173451 | AAGUCUU  |
| ENSG00000173451 | ACUUGGA  |
| ENSG00000173451 | CUUUGGU  |
| ENSG00000173451 | GUAUUCU  |
| ENSG00000173451 | UGCAUAG  |
| ENSG00000173451 | UGCAUUA  |
| ENSG00000173452 | AAGUCUU  |
| ENSG00000173452 | ACAGUAC  |
| ENSG00000173452 | UACAGUU  |
| ENSG00000173452 | UCAUUCG  |
| ENSG00000173452 | UCUGGAG  |



|                 |          |
|-----------------|----------|
| ENSG00000173452 | UGUCUUU  |
| ENSG00000173456 | CACCACC  |
| ENSG00000173456 | GGAGAGA  |
| ENSG00000173456 | GGCCUG   |
| ENSG00000173456 | GGGUGC   |
| ENSG00000173456 | UCACCAC  |
| ENSG00000173456 | UGCAUUAU |
| ENSG00000173457 | GGGGCAG  |
| ENSG00000173473 | AAAGCUG  |
| ENSG00000173473 | AAAGUAC  |
| ENSG00000173473 | AAGGCAC  |
| ENSG00000173473 | AAGUCUU  |
| ENSG00000173473 | ACAGUAU  |
| ENSG00000173473 | ACCACAG  |
| ENSG00000173473 | ACCUGGA  |
| ENSG00000173473 | AGGUAGU  |
| ENSG00000173473 | AGUGAUC  |
| ENSG00000173473 | AUGCCUU  |
| ENSG00000173473 | CAGCAGG  |
| ENSG00000173473 | GAGGUAG  |
| ENSG00000173473 | UCACAUU  |
| ENSG00000173473 | UCCUAUA  |
| ENSG00000173473 | UGCAUAG  |
| ENSG00000173473 | UUAGGAU  |
| ENSG00000173482 | AAAGAGC  |
| ENSG00000173482 | AGUGCAA  |
| ENSG00000173482 | CAGUGCA  |
| ENSG00000173482 | GGCAGUG  |
| ENSG00000173482 | UGUGCUU  |
| ENSG00000173486 | AACAGUC  |
| ENSG00000173486 | CAGUCUG  |
| ENSG00000173511 | CUGCAGG  |
| ENSG00000173511 | UGUCUGG  |
| ENSG00000173511 | UUCCGGC  |
| ENSG00000173540 | AAUUAUU  |
| ENSG00000173540 | UCUUGAG  |
| ENSG00000173542 | AACCUGG  |
| ENSG00000173542 | AACCUGU  |
| ENSG00000173542 | AAGGCAC  |
| ENSG00000173542 | ACAUUAC  |
| ENSG00000173542 | AGCACCA  |
| ENSG00000173542 | CACCACC  |
| ENSG00000173542 | CAGCAA   |
| ENSG00000173542 | CAGUCUG  |
| ENSG00000173542 | CUCCAUAU |
| ENSG00000173542 | GGAAGAC  |
| ENSG00000173542 | GUAUUCU  |
| ENSG00000173542 | UCACAGU  |
| ENSG00000173542 | UCACAUU  |
| ENSG00000173542 | UCCCACA  |
| ENSG00000173542 | UGUGCUU  |
| ENSG00000173542 | UUCAAGC  |
| ENSG00000173545 | AAGUAGC  |
| ENSG00000173545 | AGCAGCG  |
| ENSG00000173545 | AGCAGCU  |
| ENSG00000173545 | CAGCAA   |
| ENSG00000173546 | AUAUUAU  |
| ENSG00000173548 | AGCAGCA  |
| ENSG00000173559 | AAAAGUA  |
| ENSG00000173559 | AAGUGUG  |
| ENSG00000173559 | AGCAGCU  |
| ENSG00000173559 | CACAGUG  |
| ENSG00000173559 | UACAAAG  |
| ENSG00000173559 | UCACAGG  |

|                 |         |
|-----------------|---------|
| ENSG00000173559 | UCAUAGA |
| ENSG00000173567 | AUCCUUU |
| ENSG00000173575 | AAAGUAC |
| ENSG00000173575 | AAUACUG |
| ENSG00000173575 | AAUCACU |
| ENSG00000173575 | ACAUCAC |
| ENSG00000173575 | AGGACAC |
| ENSG00000173575 | AGUAACA |
| ENSG00000173575 | AUAUAAC |
| ENSG00000173575 | AUCACUA |
| ENSG00000173575 | AUGGCAC |
| ENSG00000173575 | CAGCAGA |
| ENSG00000173575 | CCUGCUG |
| ENSG00000173575 | GAUCAGA |
| ENSG00000173575 | GCCUGGA |
| ENSG00000173575 | GGCAUUG |
| ENSG00000173575 | UAAUAUC |
| ENSG00000173575 | UGAAAUG |
| ENSG00000173575 | UGCUGAC |
| ENSG00000173575 | UUGGUCC |
| ENSG00000173588 | UUGGCAC |
| ENSG00000173598 | AAGGCAC |
| ENSG00000173598 | ACAUAGA |
| ENSG00000173598 | ACUGUAG |
| ENSG00000173598 | AGCUGCC |
| ENSG00000173598 | AGUAGAC |
| ENSG00000173598 | AUGGCUU |
| ENSG00000173598 | CAAAGCA |
| ENSG00000173598 | CCAGUGC |
| ENSG00000173598 | CUUACAG |
| ENSG00000173598 | GACCAUG |
| ENSG00000173598 | GGAGGCA |
| ENSG00000173598 | GGUUGAC |
| ENSG00000173598 | GUAACAG |
| ENSG00000173598 | UAAUGCU |
| ENSG00000173598 | UAUUACC |
| ENSG00000173598 | UGCAUAG |
| ENSG00000173598 | UGCAUAU |
| ENSG00000173598 | UUGAUCA |
| ENSG00000173598 | UUUGCAA |
| ENSG00000173599 | GAGAUGA |
| ENSG00000173599 | UUGGCAC |
| ENSG00000173614 | CCAUUAC |
| ENSG00000173614 | UUCUGCA |
| ENSG00000173621 | GAGGUAG |
| ENSG00000173621 | GAGGUAU |
| ENSG00000173653 | AAUCUCU |
| ENSG00000173653 | AGCAGCU |
| ENSG00000173653 | CUACAAA |
| ENSG00000173653 | CUGGCUC |
| ENSG00000173653 | GAGAAAU |
| ENSG00000173653 | UACAAAG |
| ENSG00000173653 | UUGGUCC |
| ENSG00000173674 | AACUACU |
| ENSG00000173674 | GCAGCAU |
| ENSG00000173674 | GGAUUUC |
| ENSG00000173674 | GUGCCAC |
| ENSG00000173674 | UAUAAAG |
| ENSG00000173681 | CCCUGAG |
| ENSG00000173681 | UCAACAG |
| ENSG00000173681 | UGCAGCU |
| ENSG00000173681 | UUUGCAC |
| ENSG00000173681 | UUUUUGC |
| ENSG00000173692 | GAAAACA |

|                 |          |
|-----------------|----------|
| ENSG00000173698 | CUCACAC  |
| ENSG00000173698 | GGCAGUG  |
| ENSG00000173698 | UACAAAG  |
| ENSG00000173698 | UGAGAAG  |
| ENSG00000173705 | AGGUUUAU |
| ENSG00000173705 | GUUAAUG  |
| ENSG00000173705 | UCCUGAG  |
| ENSG00000173705 | UUGUGUC  |
| ENSG00000173706 | AAGACAU  |
| ENSG00000173706 | AAGGUGC  |
| ENSG00000173706 | ACAGUAU  |
| ENSG00000173706 | AGUAACA  |
| ENSG00000173706 | AUUGCAC  |
| ENSG00000173706 | CACAGUG  |
| ENSG00000173706 | CUACAAA  |
| ENSG00000173706 | CUACAGU  |
| ENSG00000173706 | CUGGAAA  |
| ENSG00000173706 | CUGGGCA  |
| ENSG00000173706 | CUUACAG  |
| ENSG00000173706 | GCUACAU  |
| ENSG00000173706 | GUCACUC  |
| ENSG00000173706 | GUGCAAA  |
| ENSG00000173706 | UAUUGCU  |
| ENSG00000173706 | UCACAGG  |
| ENSG00000173706 | UCCAGAG  |
| ENSG00000173706 | UCCUCUCU |
| ENSG00000173706 | UCUGGAA  |
| ENSG00000173706 | UCUGGAG  |
| ENSG00000173726 | AGAUAAA  |
| ENSG00000173726 | AGCAGCA  |
| ENSG00000173726 | AGCCCUU  |
| ENSG00000173726 | AGUGUGC  |
| ENSG00000173726 | CUGCUCU  |
| ENSG00000173726 | GAGAAAU  |
| ENSG00000173726 | GGUAGAC  |
| ENSG00000173726 | UCAACAG  |
| ENSG00000173726 | UGAGAAU  |
| ENSG00000173726 | UGCCUCG  |
| ENSG00000173726 | UUCAAAU  |
| ENSG00000173757 | AAAAAUC  |
| ENSG00000173757 | CAUGGAU  |
| ENSG00000173757 | CCUUCUG  |
| ENSG00000173757 | GACCUGG  |
| ENSG00000173757 | GUAACAG  |
| ENSG00000173757 | UAUAAAAG |
| ENSG00000173757 | UGUAUAA  |
| ENSG00000173786 | AGCCAGU  |
| ENSG00000173786 | CACUGUU  |
| ENSG00000173786 | CAGCAGA  |
| ENSG00000173786 | CAGCUGG  |
| ENSG00000173786 | CCUUCAU  |
| ENSG00000173786 | CUGGGCA  |
| ENSG00000173786 | GAGGCAG  |
| ENSG00000173786 | GGAAGAC  |
| ENSG00000173786 | GGAGGCA  |
| ENSG00000173786 | GGCAAGA  |
| ENSG00000173786 | GUGAAUG  |
| ENSG00000173786 | UAGAGGA  |
| ENSG00000173786 | UCCUCUCU |
| ENSG00000173786 | UUGGUCC  |
| ENSG00000173801 | AAAAACC  |
| ENSG00000173801 | AUACAAG  |
| ENSG00000173801 | CAAGAGC  |
| ENSG00000173801 | CUUUGGU  |

|                 |         |
|-----------------|---------|
| ENSG00000173801 | GAAACAU |
| ENSG00000173801 | GGAGAGA |
| ENSG00000173801 | GGUCUAG |
| ENSG00000173801 | UCACCAC |
| ENSG00000173801 | UUGGUCC |
| ENSG00000173805 | CAGCAAA |
| ENSG00000173805 | CCCUGUC |
| ENSG00000173805 | CUCCAGC |
| ENSG00000173805 | CUGCAGG |
| ENSG00000173805 | GACCCUG |
| ENSG00000173805 | GCUGUCU |
| ENSG00000173805 | GUGGGGA |
| ENSG00000173805 | UGCAAAG |
| ENSG00000173805 | UGGCCCU |
| ENSG00000173812 | CUAGUCC |
| ENSG00000173821 | CCAGUGC |
| ENSG00000173821 | CCUUCAU |
| ENSG00000173821 | GAGCUGC |
| ENSG00000173821 | GGCAGUG |
| ENSG00000173825 | UCCAUA  |
| ENSG00000173826 | UCUCACC |
| ENSG00000173838 | AGGGAGG |
| ENSG00000173846 | AAAGCUG |
| ENSG00000173846 | CCCCCAG |
| ENSG00000173846 | GGCUCAG |
| ENSG00000173848 | AUGGCUU |
| ENSG00000173848 | AUCAUU  |
| ENSG00000173848 | GGAAUGU |
| ENSG00000173848 | GGCUCAG |
| ENSG00000173852 | AAAGAGC |
| ENSG00000173852 | AAAGAGG |
| ENSG00000173852 | AAAGUUU |
| ENSG00000173852 | AAUCUCA |
| ENSG00000173852 | CCAUUAC |
| ENSG00000173852 | UAAUACA |
| ENSG00000173852 | UGCAUAU |
| ENSG00000173868 | AUGGCUU |
| ENSG00000173868 | CACCACC |
| ENSG00000173868 | CUGGCUC |
| ENSG00000173868 | CUUCACC |
| ENSG00000173868 | CUUUGGU |
| ENSG00000173868 | UGCAUAG |
| ENSG00000173889 | AAAGAGC |
| ENSG00000173889 | AAGUCUU |
| ENSG00000173889 | AGCAGCA |
| ENSG00000173889 | AGGUUAU |
| ENSG00000173889 | CAAAGCA |
| ENSG00000173889 | CAGUGCA |
| ENSG00000173889 | CCCCUGG |
| ENSG00000173889 | CCUGUAC |
| ENSG00000173889 | CUACAAA |
| ENSG00000173889 | GAGGCUG |
| ENSG00000173889 | GAGGUAG |
| ENSG00000173889 | GCAGGUU |
| ENSG00000173889 | GGAAGAC |
| ENSG00000173889 | GGCAAGA |
| ENSG00000173889 | GUAAACA |
| ENSG00000173889 | GUUAAUG |
| ENSG00000173889 | UAAUAUC |
| ENSG00000173889 | UAUUGCU |
| ENSG00000173889 | UCAUGAU |
| ENSG00000173889 | UGAAGCU |
| ENSG00000173889 | UGACAUC |
| ENSG00000173889 | UGAUCCA |

|                 |          |
|-----------------|----------|
| ENSG00000173894 | AAGGCAC  |
| ENSG00000173894 | AGCACCA  |
| ENSG00000173894 | AGCAGCA  |
| ENSG00000173894 | AGGGAGG  |
| ENSG00000173894 | CAAAGUG  |
| ENSG00000173894 | CAGCAAA  |
| ENSG00000173894 | GAGGUAG  |
| ENSG00000173894 | GAUUGUC  |
| ENSG00000173894 | UCCUGAG  |
| ENSG00000173894 | UGGGAUC  |
| ENSG00000173894 | UUGGCAA  |
| ENSG00000173894 | UUGGCAC  |
| ENSG00000173898 | AAUCACU  |
| ENSG00000173898 | AGCAGCA  |
| ENSG00000173898 | AGCAGCG  |
| ENSG00000173898 | AGCAGCU  |
| ENSG00000173898 | CACCACC  |
| ENSG00000173898 | CAGCAGG  |
| ENSG00000173905 | AGCAGCU  |
| ENSG00000173905 | AUUCAUU  |
| ENSG00000173905 | CAGUAGA  |
| ENSG00000173905 | CAGUAGU  |
| ENSG00000173915 | AUGAUGA  |
| ENSG00000173917 | ACAAUUAU |
| ENSG00000173917 | AUAAAGU  |
| ENSG00000173917 | UCCUAUA  |
| ENSG00000173918 | AAAGAGC  |
| ENSG00000173918 | AAUGUUG  |
| ENSG00000173926 | AGCAAAA  |
| ENSG00000173926 | CCAGUGC  |
| ENSG00000173926 | GGCAGCG  |
| ENSG00000173926 | UCACACA  |
| ENSG00000173926 | UUCAAAU  |
| ENSG00000173926 | UUGGCAA  |
| ENSG00000173926 | UUGGCAC  |
| ENSG00000173930 | AAUUAAU  |
| ENSG00000173930 | GUAGUGU  |
| ENSG00000173933 | AACUCUA  |
| ENSG00000173933 | CCCACCG  |
| ENSG00000173933 | CCCACCU  |
| ENSG00000173933 | GUAUUCU  |
| ENSG00000173933 | UCCCACC  |
| ENSG00000173933 | UCCUGAG  |
| ENSG00000173933 | UUCUGCA  |
| ENSG00000173947 | UAAUAUC  |
| ENSG00000173950 | ACCAGCA  |
| ENSG00000173950 | CUUCUCU  |
| ENSG00000173991 | AGCAGCU  |
| ENSG00000173991 | CUACAAA  |
| ENSG00000173991 | CUCUGGG  |
| ENSG00000173991 | CUGGCUC  |
| ENSG00000173991 | UACAAAG  |
| ENSG00000174007 | AAAAGUA  |
| ENSG00000174007 | AAAGUAA  |
| ENSG00000174007 | AGUAACA  |
| ENSG00000174013 | AAAGAGG  |
| ENSG00000174013 | AAGUGCA  |
| ENSG00000174013 | AAUCACU  |
| ENSG00000174013 | ACAAUUAU |
| ENSG00000174013 | AGCUGCC  |
| ENSG00000174013 | AGGAUGU  |
| ENSG00000174013 | AGGUAGU  |
| ENSG00000174013 | AUCCUUG  |
| ENSG00000174013 | CAAAACU  |

|                 |          |
|-----------------|----------|
| ENSG00000174013 | CAGUCCA  |
| ENSG00000174013 | CCCUGAG  |
| ENSG00000174013 | CUCCAGC  |
| ENSG00000174013 | CUUCACC  |
| ENSG00000174013 | CUUGGAG  |
| ENSG00000174013 | GACCAUG  |
| ENSG00000174013 | GAGGAUA  |
| ENSG00000174013 | GAGGUAG  |
| ENSG00000174013 | GAGGUAU  |
| ENSG00000174013 | GUAGUGU  |
| ENSG00000174013 | GUGAGGU  |
| ENSG00000174013 | UCACAAG  |
| ENSG00000174013 | UCCAGUU  |
| ENSG00000174013 | UCUCAAG  |
| ENSG00000174013 | UCUCACC  |
| ENSG00000174013 | UUCUUGU  |
| ENSG00000174016 | UCACAUU  |
| ENSG00000174021 | GAGGUAG  |
| ENSG00000174059 | AUCACUA  |
| ENSG00000174083 | GUAGUGU  |
| ENSG00000174099 | AAAGAAU  |
| ENSG00000174099 | AAAUGGU  |
| ENSG00000174099 | ACAAUAU  |
| ENSG00000174099 | ACUGUUU  |
| ENSG00000174099 | AUGGCUU  |
| ENSG00000174099 | CAA AUGC |
| ENSG00000174099 | CACACCG  |
| ENSG00000174099 | CACACCU  |
| ENSG00000174099 | CAUAUUG  |
| ENSG00000174099 | CCCUGAG  |
| ENSG00000174099 | CUCAAC   |
| ENSG00000174099 | CUGGCUC  |
| ENSG00000174099 | GAAGGAA  |
| ENSG00000174099 | UACAGUU  |
| ENSG00000174099 | UAUUACC  |
| ENSG00000174099 | UCACACA  |
| ENSG00000174099 | UCCUAUA  |
| ENSG00000174099 | UGCAGCU  |
| ENSG00000174099 | UGCAUUG  |
| ENSG00000174099 | UGUCUUU  |
| ENSG00000174099 | UUGCAUA  |
| ENSG00000174099 | UUGAGGC  |
| ENSG00000174106 | AAUACUG  |
| ENSG00000174106 | AGCUUAU  |
| ENSG00000174106 | GUUCAUG  |
| ENSG00000174106 | UAUUGCU  |
| ENSG00000174111 | AAUGCCC  |
| ENSG00000174111 | GUGCUUG  |
| ENSG00000174111 | UGUGCUU  |
| ENSG00000174111 | UUGGCAA  |
| ENSG00000174123 | UAUAAAAG |
| ENSG00000174132 | AAGGCAC  |
| ENSG00000174136 | AAAGUAC  |
| ENSG00000174136 | ACAAUAU  |
| ENSG00000174136 | ACUGUUU  |
| ENSG00000174136 | AGUGCUU  |
| ENSG00000174136 | AUAAAAGU |
| ENSG00000174136 | AUGACAC  |
| ENSG00000174136 | AUGUAAU  |
| ENSG00000174136 | CCAGUGU  |
| ENSG00000174136 | CUAUACA  |
| ENSG00000174136 | GGCAGGG  |
| ENSG00000174136 | GGCAGUG  |
| ENSG00000174136 | GGUGGGC  |

|                 |          |
|-----------------|----------|
| ENSG00000174136 | GUGCAAA  |
| ENSG00000174136 | UAAUAUC  |
| ENSG00000174136 | UAUAAAAG |
| ENSG00000174136 | UUCUAAU  |
| ENSG00000174136 | UUUGCAA  |
| ENSG00000174137 | AAAAAUC  |
| ENSG00000174137 | CAAAGCA  |
| ENSG00000174137 | UUAGGAU  |
| ENSG00000174151 | AAAGUGC  |
| ENSG00000174151 | AGGCAGG  |
| ENSG00000174151 | CAGCUGG  |
| ENSG00000174151 | GAAGGAA  |
| ENSG00000174151 | GCAGAAG  |
| ENSG00000174151 | GGAGGAG  |
| ENSG00000174151 | GGAGGCA  |
| ENSG00000174151 | UGCCAGC  |
| ENSG00000174151 | UUCUGCA  |
| ENSG00000174165 | CUGGCUC  |
| ENSG00000174197 | AAAAACC  |
| ENSG00000174197 | AAAUCCC  |
| ENSG00000174197 | AACAUUC  |
| ENSG00000174197 | AAGUGCA  |
| ENSG00000174197 | AAUACUG  |
| ENSG00000174197 | AAUCUCA  |
| ENSG00000174197 | ACAUUCA  |
| ENSG00000174197 | ACUAGAU  |
| ENSG00000174197 | AGCACCA  |
| ENSG00000174197 | AGCAGCU  |
| ENSG00000174197 | AUAUAAC  |
| ENSG00000174197 | CUGCAGC  |
| ENSG00000174197 | CUUUGGU  |
| ENSG00000174197 | GAGAAAU  |
| ENSG00000174197 | GAGGUAG  |
| ENSG00000174197 | GAGGUAU  |
| ENSG00000174197 | GCACCAU  |
| ENSG00000174197 | GCAGCAU  |
| ENSG00000174197 | GGCAUUG  |
| ENSG00000174197 | GUGAGGU  |
| ENSG00000174197 | UAAUAUC  |
| ENSG00000174197 | UACAAAG  |
| ENSG00000174197 | UCCUGU   |
| ENSG00000174197 | UCCUGAG  |
| ENSG00000174197 | UGUAUAA  |
| ENSG00000174197 | UUCAAAU  |
| ENSG00000174197 | UUCAAGC  |
| ENSG00000174206 | CUUUGGU  |
| ENSG00000174206 | GUGCAAA  |
| ENSG00000174225 | UCUUGAG  |
| ENSG00000174231 | AUACAAG  |
| ENSG00000174233 | AACAUUC  |
| ENSG00000174233 | AAUGCCC  |
| ENSG00000174233 | AAUUUUA  |
| ENSG00000174233 | ACAGUAC  |
| ENSG00000174233 | ACAUUAC  |
| ENSG00000174233 | AGCUGCC  |
| ENSG00000174233 | AGUGGUU  |
| ENSG00000174233 | AUAUUAU  |
| ENSG00000174233 | CACAGUG  |
| ENSG00000174233 | CUCCAC   |
| ENSG00000174233 | CUGACUC  |
| ENSG00000174233 | CUGCAGG  |
| ENSG00000174233 | GAAACAU  |
| ENSG00000174233 | GGUUACC  |
| ENSG00000174233 | UAUAAAAG |

|                 |         |
|-----------------|---------|
| ENSG00000174233 | UCACAGG |
| ENSG00000174233 | UCACAGU |
| ENSG00000174233 | UUGGUCC |
| ENSG00000174233 | UUGUUCG |
| ENSG00000174238 | ACAUCAC |
| ENSG00000174238 | ACUUGGA |
| ENSG00000174238 | AGCACCA |
| ENSG00000174238 | AUUGCAC |
| ENSG00000174238 | CACAAUG |
| ENSG00000174238 | CACAGGG |
| ENSG00000174238 | CACCACC |
| ENSG00000174238 | CACCAGC |
| ENSG00000174238 | CAGUGCA |
| ENSG00000174238 | CUGUUGA |
| ENSG00000174238 | GCAGCAU |
| ENSG00000174238 | GGAAGAC |
| ENSG00000174238 | GGAGAGA |
| ENSG00000174238 | GUCACUC |
| ENSG00000174238 | UACAAAG |
| ENSG00000174238 | UAUUGCU |
| ENSG00000174238 | UCACAAG |
| ENSG00000174238 | UCACAUU |
| ENSG00000174238 | UCACCAC |
| ENSG00000174238 | UGCAAAG |
| ENSG00000174238 | UGCUGAC |
| ENSG00000174238 | UUUUUGC |
| ENSG00000174243 | CAGUCUG |
| ENSG00000174243 | CUUCUCU |
| ENSG00000174255 | UCCCACC |
| ENSG00000174282 | AACAUUC |
| ENSG00000174282 | AAGGUGC |
| ENSG00000174282 | AAGUGCA |
| ENSG00000174282 | CAGUAGA |
| ENSG00000174282 | CAGUAGU |
| ENSG00000174282 | GAAGGAA |
| ENSG00000174282 | GACCUGG |
| ENSG00000174282 | GGAAUGU |
| ENSG00000174282 | GGCCUG  |
| ENSG00000174282 | UAUUGCU |
| ENSG00000174282 | UGCAAAG |
| ENSG00000174282 | UGGUACC |
| ENSG00000174282 | UUGGUCC |
| ENSG00000174306 | ACUGGCC |
| ENSG00000174306 | AGCAGCG |
| ENSG00000174306 | AGCAGCU |
| ENSG00000174306 | AUAUAAC |
| ENSG00000174306 | CAGUGCA |
| ENSG00000174306 | CCUUCAU |
| ENSG00000174306 | CUCACAC |
| ENSG00000174306 | CUCUGGG |
| ENSG00000174306 | CUGGGCA |
| ENSG00000174306 | CUUUGGU |
| ENSG00000174306 | GAAGGAA |
| ENSG00000174306 | GAGAUGA |
| ENSG00000174306 | GAGUAUU |
| ENSG00000174306 | GCAUCCC |
| ENSG00000174306 | UAUCAGA |
| ENSG00000174306 | UUAGGAU |
| ENSG00000174306 | UUGGCAA |
| ENSG00000174306 | UUGGUCC |
| ENSG00000174307 | AGCAGCA |
| ENSG00000174307 | AGUGUGC |
| ENSG00000174307 | CAGCAGG |
| ENSG00000174307 | GGGUCC  |



|                 |          |
|-----------------|----------|
| ENSG00000174307 | GUGCAAA  |
| ENSG00000174307 | UGAAAUG  |
| ENSG00000174307 | UGCAAAG  |
| ENSG00000174332 | AAUGUUG  |
| ENSG00000174332 | CUUGUAU  |
| ENSG00000174348 | AAAAAUC  |
| ENSG00000174348 | AAAGAAU  |
| ENSG00000174348 | AAGGCAC  |
| ENSG00000174348 | AUAUUAU  |
| ENSG00000174348 | UAAUGCU  |
| ENSG00000174348 | UGUCUGG  |
| ENSG00000174370 | AAUUGCU  |
| ENSG00000174370 | CUCCAGC  |
| ENSG00000174371 | AUACAAG  |
| ENSG00000174437 | AUGCAUU  |
| ENSG00000174437 | CAGCAAA  |
| ENSG00000174437 | GCACCAU  |
| ENSG00000174469 | AAAGAGG  |
| ENSG00000174469 | AACUCUA  |
| ENSG00000174469 | AGGAUGU  |
| ENSG00000174469 | AUAAAAGU |
| ENSG00000174469 | CAGGAAC  |
| ENSG00000174469 | CCCUGUU  |
| ENSG00000174469 | CCUUCUG  |
| ENSG00000174469 | CUACAAA  |
| ENSG00000174469 | GGCUCUG  |
| ENSG00000174469 | UAAGACU  |
| ENSG00000174469 | UAUAAAAG |
| ENSG00000174469 | UCACAAG  |
| ENSG00000174469 | UCAUUCG  |
| ENSG00000174469 | UCCAGAG  |
| ENSG00000174469 | UUGGCAC  |
| ENSG00000174482 | GGUAGAC  |
| ENSG00000174482 | UUUGCAA  |
| ENSG00000174483 | CACCACC  |
| ENSG00000174483 | GGUGGUU  |
| ENSG00000174502 | AACCUGU  |
| ENSG00000174502 | AACUCUA  |
| ENSG00000174502 | ACAUUCA  |
| ENSG00000174502 | CUGGGCA  |
| ENSG00000174502 | GGCAGCG  |
| ENSG00000174502 | GUCAUUG  |
| ENSG00000174502 | UCAAGUA  |
| ENSG00000174502 | UCUCAAG  |
| ENSG00000174502 | UCUGGAA  |
| ENSG00000174502 | UCUGGAG  |
| ENSG00000174502 | UGAAAUG  |
| ENSG00000174502 | UUCAAGC  |
| ENSG00000174502 | UUGGCAA  |
| ENSG00000174502 | UUGGCAC  |
| ENSG00000174514 | AAUCCUU  |
| ENSG00000174514 | GCUGUCU  |
| ENSG00000174514 | UUUCAAC  |
| ENSG00000174516 | AGCAGCG  |
| ENSG00000174516 | CACAGUG  |
| ENSG00000174516 | CAGCAGG  |
| ENSG00000174516 | CCCCCAG  |
| ENSG00000174516 | GGCUCAG  |
| ENSG00000174564 | CAGGCUC  |
| ENSG00000174567 | AGGAGCU  |
| ENSG00000174567 | CCUUCUG  |
| ENSG00000174574 | AAAGUUU  |
| ENSG00000174574 | CACUGUU  |
| ENSG00000174574 | CCCUGUC  |

|                 |          |
|-----------------|----------|
| ENSG00000174574 | CCCGUUU  |
| ENSG00000174574 | CUCAGGG  |
| ENSG00000174574 | CUUGGAG  |
| ENSG00000174574 | GGAGUCC  |
| ENSG00000174574 | GUGCUUG  |
| ENSG00000174574 | UCAAGUA  |
| ENSG00000174574 | UCACAGG  |
| ENSG00000174574 | UCCCUGU  |
| ENSG00000174574 | UCGUGCA  |
| ENSG00000174574 | UCUUGAG  |
| ENSG00000174574 | UGAAAUG  |
| ENSG00000174574 | UUCAAGC  |
| ENSG00000174576 | AAAGUUU  |
| ENSG00000174576 | AAGUCAC  |
| ENSG00000174576 | ACAAUUA  |
| ENSG00000174576 | AGCACCA  |
| ENSG00000174576 | CAAGAGC  |
| ENSG00000174576 | CCCACCU  |
| ENSG00000174576 | CUACAAA  |
| ENSG00000174576 | GAGAACU  |
| ENSG00000174576 | GAGCCCC  |
| ENSG00000174576 | GGGGUGG  |
| ENSG00000174576 | UACAAAG  |
| ENSG00000174595 | CAGUCUG  |
| ENSG00000174611 | AAAAAUC  |
| ENSG00000174611 | AAAUUUC  |
| ENSG00000174611 | AAUCACU  |
| ENSG00000174611 | AAUCCUU  |
| ENSG00000174611 | ACAUAGA  |
| ENSG00000174611 | AGCACCA  |
| ENSG00000174611 | CACCAGC  |
| ENSG00000174611 | CAGCUGG  |
| ENSG00000174611 | CCUGCUG  |
| ENSG00000174611 | GCAGCAU  |
| ENSG00000174611 | GCUGUCU  |
| ENSG00000174611 | UCAAGUA  |
| ENSG00000174611 | UGUCUUU  |
| ENSG00000174611 | UUCAAGC  |
| ENSG00000174611 | UUGGCAA  |
| ENSG00000174628 | AAAUUUC  |
| ENSG00000174628 | AGAUAAA  |
| ENSG00000174628 | UGCAAAG  |
| ENSG00000174628 | UGCAUAG  |
| ENSG00000174628 | UGCAUAU  |
| ENSG00000174628 | UUCAAAU  |
| ENSG00000174628 | UUCAAGC  |
| ENSG00000174628 | UUUCAAC  |
| ENSG00000174640 | CCCUGAG  |
| ENSG00000174640 | GAGAUGA  |
| ENSG00000174640 | UGCUGAC  |
| ENSG00000174652 | UCCCACA  |
| ENSG00000174672 | AAAAAUC  |
| ENSG00000174672 | ACAGUAC  |
| ENSG00000174672 | ACAGUAU  |
| ENSG00000174672 | AGCUGCC  |
| ENSG00000174672 | CCCUGAG  |
| ENSG00000174672 | GCAGGAC  |
| ENSG00000174672 | UACAGUU  |
| ENSG00000174672 | UAUAAAAG |
| ENSG00000174672 | UCCCUGU  |
| ENSG00000174697 | AGCACCA  |
| ENSG00000174697 | CACAGUG  |
| ENSG00000174697 | CAGUAGA  |
| ENSG00000174697 | GGGCCCC  |

|                 |         |
|-----------------|---------|
| ENSG00000174697 | UCACAGU |
| ENSG00000174705 | AAAGAGC |
| ENSG00000174705 | ACUGCAG |
| ENSG00000174705 | AGCACCA |
| ENSG00000174705 | CUGCAGG |
| ENSG00000174705 | CUGGGCA |
| ENSG00000174705 | CUUUGGU |
| ENSG00000174705 | GCUACAU |
| ENSG00000174705 | UAUUGCU |
| ENSG00000174705 | UGAAGCU |
| ENSG00000174705 | UUGGCAA |
| ENSG00000174705 | UUGGCAC |
| ENSG00000174705 | UUGGUCC |
| ENSG00000174718 | AAAAGUA |
| ENSG00000174718 | UCACAGU |
| ENSG00000174718 | UUCAAGC |
| ENSG00000174721 | UUUGCAA |
| ENSG00000174721 | UUUUUGC |
| ENSG00000174740 | UUAUGCA |
| ENSG00000174744 | UCCAGUU |
| ENSG00000174748 | AAAGCUG |
| ENSG00000174748 | ACUCAA  |
| ENSG00000174748 | AUGCACC |
| ENSG00000174748 | CUGGAAA |
| ENSG00000174748 | GCACCAU |
| ENSG00000174748 | UACAAAG |
| ENSG00000174748 | UAUUGCU |
| ENSG00000174748 | UGACUGU |
| ENSG00000174748 | UUGACAC |
| ENSG00000174775 | ACUGUGU |
| ENSG00000174780 | AACACUG |
| ENSG00000174780 | AAUACUG |
| ENSG00000174780 | AGCAGCA |
| ENSG00000174780 | GUGCUUG |
| ENSG00000174780 | UCACAAG |
| ENSG00000174780 | UGUGCUU |
| ENSG00000174796 | ACUUGGA |
| ENSG00000174796 | CGUACCG |
| ENSG00000174796 | UAAUGCU |
| ENSG00000174799 | ACAUUCA |
| ENSG00000174799 | CACAGUG |
| ENSG00000174799 | UCACAGG |
| ENSG00000174804 | AAAAAUC |
| ENSG00000174804 | AAAGUGC |
| ENSG00000174804 | AAAUCCC |
| ENSG00000174804 | AACCUGU |
| ENSG00000174804 | ACUCCAG |
| ENSG00000174804 | ACUGGCU |
| ENSG00000174804 | AGCACCA |
| ENSG00000174804 | AGUGAUC |
| ENSG00000174804 | AUAUUAU |
| ENSG00000174804 | AUUCAUU |
| ENSG00000174804 | CAGCAGA |
| ENSG00000174804 | CCAGUGC |
| ENSG00000174804 | CUCCAUU |
| ENSG00000174804 | CUCCCAA |
| ENSG00000174804 | CUCUGGG |
| ENSG00000174804 | CUCUUCC |
| ENSG00000174804 | CUGCAGG |
| ENSG00000174804 | CUGCCC  |
| ENSG00000174804 | GAGGUAU |
| ENSG00000174804 | GAGUAUU |
| ENSG00000174804 | GAUUGUA |
| ENSG00000174804 | GCACCAU |

|                 |         |
|-----------------|---------|
| ENSG00000174804 | GCAGCAU |
| ENSG00000174804 | GCAGGAC |
| ENSG00000174804 | GGCAAGA |
| ENSG00000174804 | GGCAUUG |
| ENSG00000174804 | GGGAACG |
| ENSG00000174804 | GUAACAG |
| ENSG00000174804 | GUCUCUG |
| ENSG00000174804 | GUGAAUG |
| ENSG00000174804 | GUGCUUG |
| ENSG00000174804 | UAAGACG |
| ENSG00000174804 | UAAGACU |
| ENSG00000174804 | UCACACA |
| ENSG00000174804 | UCACAGG |
| ENSG00000174804 | UCACAGU |
| ENSG00000174804 | UCCAGAG |
| ENSG00000174804 | UCCAGUU |
| ENSG00000174804 | UCCCACC |
| ENSG00000174804 | UCCCUGU |
| ENSG00000174804 | UCUGGAA |
| ENSG00000174804 | UCUGGAG |
| ENSG00000174804 | UGAAAGG |
| ENSG00000174804 | UGAGAAU |
| ENSG00000174804 | UGGUACC |
| ENSG00000174804 | UGUCUGG |
| ENSG00000174804 | UGUGCUU |
| ENSG00000174804 | UUGACAC |
| ENSG00000174807 | CAGCUGG |
| ENSG00000174807 | GAGAAGA |
| ENSG00000174807 | UGGAGAU |
| ENSG00000174839 | AAAGUGC |
| ENSG00000174839 | ACUGCAG |
| ENSG00000174839 | AGCACCA |
| ENSG00000174839 | AGCAGCA |
| ENSG00000174839 | AGCAGCU |
| ENSG00000174839 | CAAAGCA |
| ENSG00000174839 | CCAGUGU |
| ENSG00000174839 | GAGGUAU |
| ENSG00000174839 | GAUUGGU |
| ENSG00000174839 | GCUGGUG |
| ENSG00000174839 | UGCCAGC |
| ENSG00000174839 | UUGGCAA |
| ENSG00000174839 | UUGGCAC |
| ENSG00000174840 | AAAGCUG |
| ENSG00000174840 | AUGAGCU |
| ENSG00000174840 | GAGGUAU |
| ENSG00000174840 | UGUGCUU |
| ENSG00000174871 | ACAUAGA |
| ENSG00000174871 | AGCAGCA |
| ENSG00000174871 | AGCCUGC |
| ENSG00000174871 | AGUAGUU |
| ENSG00000174871 | CAGUAGU |
| ENSG00000174871 | CCAGUGC |
| ENSG00000174871 | CCCACCU |
| ENSG00000174871 | CCUGCUG |
| ENSG00000174871 | CUGCAGG |
| ENSG00000174871 | CUGCUCA |
| ENSG00000174871 | CUGGGCA |
| ENSG00000174871 | CUGGGGG |
| ENSG00000174871 | GGGGAGC |
| ENSG00000174871 | GGGGUGC |
| ENSG00000174871 | GGGGUGG |
| ENSG00000174871 | UGGGGGA |
| ENSG00000174899 | CAAAACU |
| ENSG00000174903 | AAUGCCC |

|                 |          |
|-----------------|----------|
| ENSG00000174903 | ACUCAAA  |
| ENSG00000174903 | AGGACAC  |
| ENSG00000174903 | AUGGCUU  |
| ENSG00000174903 | CAAUUGC  |
| ENSG00000174903 | CCCCUGG  |
| ENSG00000174903 | GCAGCAU  |
| ENSG00000174903 | GGGGAGC  |
| ENSG00000174903 | UCCUGAG  |
| ENSG00000174903 | UGCAAAG  |
| ENSG00000174915 | GGCUCAG  |
| ENSG00000174928 | UAUAAAAG |
| ENSG00000174928 | UCAUUUG  |
| ENSG00000174938 | GCUGGUG  |
| ENSG00000174938 | UUGGCAA  |
| ENSG00000174938 | UUGGCAC  |
| ENSG00000174939 | CCCUGAG  |
| ENSG00000174943 | GGAAUGU  |
| ENSG00000174943 | UAAUAGU  |
| ENSG00000174950 | CAGCUGG  |
| ENSG00000174950 | CCUGCUG  |
| ENSG00000174950 | CUCUUCC  |
| ENSG00000174950 | GCAGCAU  |
| ENSG00000174950 | GGCAGCG  |
| ENSG00000174950 | GGCUCAG  |
| ENSG00000174951 | CCCUGAG  |
| ENSG00000174953 | UUCAAAU  |
| ENSG00000174963 | AAACGGU  |
| ENSG00000174963 | AAAGAAU  |
| ENSG00000174963 | AAGAACC  |
| ENSG00000174963 | ACAUUCA  |
| ENSG00000174963 | ACUGUUU  |
| ENSG00000174963 | ACUUGGA  |
| ENSG00000174963 | AGUGUGC  |
| ENSG00000174963 | AUAUUAU  |
| ENSG00000174963 | AUCCUUU  |
| ENSG00000174963 | AUGCACC  |
| ENSG00000174963 | AUUCAUU  |
| ENSG00000174963 | CAGCUGG  |
| ENSG00000174963 | CAUGGGU  |
| ENSG00000174963 | CUCACAC  |
| ENSG00000174963 | CUUGUAU  |
| ENSG00000174963 | GCCUGGA  |
| ENSG00000174963 | GGAAUGU  |
| ENSG00000174963 | GGACGGA  |
| ENSG00000174963 | GGGUUUA  |
| ENSG00000174963 | GUUAGGA  |
| ENSG00000174963 | UAAUAGU  |
| ENSG00000174963 | UGGAUAA  |
| ENSG00000174963 | UUGACAC  |
| ENSG00000174996 | ACCCUGU  |
| ENSG00000174996 | CCCUGAG  |
| ENSG00000174996 | CUACAGU  |
| ENSG00000174996 | CUGCCCC  |
| ENSG00000174996 | GAGAUGA  |
| ENSG00000174996 | GCGGGGC  |
| ENSG00000174996 | GGCGGGG  |
| ENSG00000174996 | GGUUACC  |
| ENSG00000175029 | AAAACUG  |
| ENSG00000175029 | AACACUG  |
| ENSG00000175029 | AAUACUG  |
| ENSG00000175029 | ACAAUAU  |
| ENSG00000175029 | ACAGUAC  |
| ENSG00000175029 | ACAGUAU  |
| ENSG00000175029 | CUAUACA  |

|                 |         |
|-----------------|---------|
| ENSG00000175029 | GAAAACA |
| ENSG00000175029 | GAGAAAU |
| ENSG00000175029 | GGAAUGU |
| ENSG00000175029 | GGGUUUA |
| ENSG00000175029 | GUCUCUG |
| ENSG00000175029 | GUUCAUG |
| ENSG00000175029 | UCACAAG |
| ENSG00000175029 | UCAUAGA |
| ENSG00000175029 | UCUUGAG |
| ENSG00000175029 | UGAAGUG |
| ENSG00000175029 | UUCCUCG |
| ENSG00000175029 | UUCUUGU |
| ENSG00000175029 | UUGGUCC |
| ENSG00000175029 | UUGUUCG |
| ENSG00000175029 | UUUGCAC |
| ENSG00000175040 | AAGUCUU |
| ENSG00000175040 | AAUACUG |
| ENSG00000175040 | ACUCAA  |
| ENSG00000175040 | CAAAACU |
| ENSG00000175040 | GUCUUGC |
| ENSG00000175040 | UAAUACA |
| ENSG00000175048 | AGCAGCA |
| ENSG00000175048 | UGGCCAC |
| ENSG00000175066 | AAAACUG |
| ENSG00000175066 | AAAUUUC |
| ENSG00000175066 | AGCACCA |
| ENSG00000175066 | AGCAGCU |
| ENSG00000175066 | CUUCUCU |
| ENSG00000175066 | GAAACAU |
| ENSG00000175066 | GCUGGUG |
| ENSG00000175066 | UUCCUAG |
| ENSG00000175073 | ACACACU |
| ENSG00000175073 | AGUGGUU |
| ENSG00000175073 | CACAAUG |
| ENSG00000175073 | CAGACAG |
| ENSG00000175073 | CCCUGAG |
| ENSG00000175073 | CUGGGCA |
| ENSG00000175073 | GCCUGGG |
| ENSG00000175073 | GCUAGCA |
| ENSG00000175073 | GUGCAA  |
| ENSG00000175073 | GUGGCC  |
| ENSG00000175073 | UAAGACG |
| ENSG00000175073 | UCACACA |
| ENSG00000175073 | UCCCUCU |
| ENSG00000175073 | UCCCUGU |
| ENSG00000175073 | UGUCUUU |
| ENSG00000175073 | UUCAAAU |
| ENSG00000175084 | CCUGCUG |
| ENSG00000175084 | CUCCCAC |
| ENSG00000175084 | UCCCUCU |
| ENSG00000175087 | AAUCUCU |
| ENSG00000175087 | ACAAUUA |
| ENSG00000175087 | ACAUUCA |
| ENSG00000175087 | AGGCAGG |
| ENSG00000175087 | CAGCAA  |
| ENSG00000175087 | CCAGCAU |
| ENSG00000175087 | CCAGUGC |
| ENSG00000175087 | CCAGUGU |
| ENSG00000175087 | CUACAGU |
| ENSG00000175087 | CUGGACU |
| ENSG00000175087 | GAAAACA |
| ENSG00000175087 | GACCAUG |
| ENSG00000175087 | GCUACAU |
| ENSG00000175087 | GGCAUUG |

|                 |          |
|-----------------|----------|
| ENSG00000175087 | GUGCAAA  |
| ENSG00000175087 | UAAUACA  |
| ENSG00000175087 | UCACCAC  |
| ENSG00000175087 | UCCAGUU  |
| ENSG00000175087 | UGCAUUG  |
| ENSG00000175087 | UUGGUCC  |
| ENSG00000175093 | AGCACCA  |
| ENSG00000175093 | AGCAGCA  |
| ENSG00000175093 | GGCUCUG  |
| ENSG00000175093 | GUGACAG  |
| ENSG00000175093 | UCAUUCG  |
| ENSG00000175097 | UUUGCAA  |
| ENSG00000175105 | AAAGUAC  |
| ENSG00000175105 | ACAUUCA  |
| ENSG00000175105 | AGCAGCA  |
| ENSG00000175105 | AUGAUGC  |
| ENSG00000175105 | AUUGCAC  |
| ENSG00000175105 | CCAGUGU  |
| ENSG00000175105 | GCUACAU  |
| ENSG00000175105 | GUGCAAA  |
| ENSG00000175105 | GUGCUUG  |
| ENSG00000175105 | UAUAAAAG |
| ENSG00000175105 | UAUUGCU  |
| ENSG00000175105 | UCAACAG  |
| ENSG00000175105 | UCAUUCG  |
| ENSG00000175105 | UGCAUAG  |
| ENSG00000175105 | UGCUGAC  |
| ENSG00000175115 | GAGGCUG  |
| ENSG00000175130 | CUCAGGG  |
| ENSG00000175130 | CUGGGCA  |
| ENSG00000175130 | GGCUCAG  |
| ENSG00000175130 | UAUAAAAG |
| ENSG00000175130 | UGGCCAC  |
| ENSG00000175137 | AAGGCAC  |
| ENSG00000175137 | AGCACCA  |
| ENSG00000175137 | CUCAAAC  |
| ENSG00000175137 | CUCCAA   |
| ENSG00000175137 | GAGUUGG  |
| ENSG00000175155 | AAACUGU  |
| ENSG00000175155 | AAAGAAU  |
| ENSG00000175155 | AAAGUAU  |
| ENSG00000175155 | AACAAAC  |
| ENSG00000175155 | AAGUGCU  |
| ENSG00000175155 | CAAAGUG  |
| ENSG00000175155 | CAAUUGC  |
| ENSG00000175155 | CACAGUG  |
| ENSG00000175155 | CUCAAAC  |
| ENSG00000175155 | CUCAGGG  |
| ENSG00000175155 | CUUGUGU  |
| ENSG00000175155 | CUUUGGU  |
| ENSG00000175155 | GACCUGG  |
| ENSG00000175155 | GAGAAAU  |
| ENSG00000175155 | GAGGUAG  |
| ENSG00000175155 | GGAAUGU  |
| ENSG00000175155 | GUCACUC  |
| ENSG00000175155 | UAGAGGA  |
| ENSG00000175155 | UAUAAAAG |
| ENSG00000175155 | UCACAGU  |
| ENSG00000175155 | UCCCUUG  |
| ENSG00000175155 | UCCCUUU  |
| ENSG00000175155 | UCUCAAG  |
| ENSG00000175155 | UUAGAGA  |
| ENSG00000175155 | UUGGUCC  |
| ENSG00000175155 | UUGGUUC  |

|                 |         |
|-----------------|---------|
| ENSG00000175161 | AAAGUGC |
| ENSG00000175161 | AAGGUGC |
| ENSG00000175161 | AAGUGCU |
| ENSG00000175161 | ACUGGCU |
| ENSG00000175161 | AGGACAC |
| ENSG00000175161 | AGUGCUG |
| ENSG00000175161 | AUAUUAU |
| ENSG00000175161 | GAGGCUG |
| ENSG00000175161 | GCUUCCU |
| ENSG00000175161 | GGUUGUC |
| ENSG00000175161 | GUGCUUG |
| ENSG00000175161 | UAUAAAG |
| ENSG00000175161 | UGCAUAG |
| ENSG00000175161 | UGUAUGU |
| ENSG00000175161 | UGUGCUU |
| ENSG00000175161 | UUCAAGC |
| ENSG00000175161 | UUGGCAC |
| ENSG00000175166 | AACAAAC |
| ENSG00000175166 | AGUAACA |
| ENSG00000175175 | AGCACCA |
| ENSG00000175175 | GAGAUGA |
| ENSG00000175175 | GCUGUCU |
| ENSG00000175182 | AUAUUAU |
| ENSG00000175182 | CUGCCCC |
| ENSG00000175182 | UGUCUGC |
| ENSG00000175182 | UUAGAGA |
| ENSG00000175183 | CACAGUG |
| ENSG00000175193 | UACAAAG |
| ENSG00000175197 | UUGGCAC |
| ENSG00000175203 | AAGAACC |
| ENSG00000175203 | ACAGUAC |
| ENSG00000175203 | CAAAGCA |
| ENSG00000175215 | AACGGAA |
| ENSG00000175215 | AACUGGU |
| ENSG00000175215 | AAGGCAC |
| ENSG00000175215 | AGGCAGG |
| ENSG00000175215 | AGGGAGG |
| ENSG00000175215 | AGGUAGU |
| ENSG00000175215 | AUGGCUU |
| ENSG00000175215 | CAGGCUC |
| ENSG00000175215 | CCCUGAG |
| ENSG00000175215 | CUACAAA |
| ENSG00000175215 | CUCUGGG |
| ENSG00000175215 | CUCUUCC |
| ENSG00000175215 | CUGCAGG |
| ENSG00000175215 | CUUUGGU |
| ENSG00000175215 | GACCCUG |
| ENSG00000175215 | GGAAGAC |
| ENSG00000175215 | GGCAGUG |
| ENSG00000175215 | GGCUCUG |
| ENSG00000175215 | UAUUGCU |
| ENSG00000175215 | UCAAGUA |
| ENSG00000175215 | UCACAGU |
| ENSG00000175215 | UCCUGAG |
| ENSG00000175215 | UUCAAGC |
| ENSG00000175215 | UUGGCAA |
| ENSG00000175215 | UUGGCAC |
| ENSG00000175216 | AAAGCUG |
| ENSG00000175216 | GUUAAUG |
| ENSG00000175220 | AAACGGU |
| ENSG00000175220 | AAGUGCA |
| ENSG00000175220 | ACAGUAC |
| ENSG00000175220 | CCAGGAG |
| ENSG00000175220 | GGAGGCA |



|                 |          |
|-----------------|----------|
| ENSG00000175220 | GGCAGUG  |
| ENSG00000175220 | GGCUCUG  |
| ENSG00000175220 | GUGCAAA  |
| ENSG00000175220 | UGAAAUG  |
| ENSG00000175220 | UGAGAAG  |
| ENSG00000175229 | AACCUGG  |
| ENSG00000175229 | AGCAGCU  |
| ENSG00000175229 | AGGCAGG  |
| ENSG00000175229 | GGCAGGG  |
| ENSG00000175229 | GGCUCAG  |
| ENSG00000175229 | GGGAGCU  |
| ENSG00000175229 | UUGGUUC  |
| ENSG00000175262 | AAAUCC   |
| ENSG00000175262 | UUCAAAU  |
| ENSG00000175264 | AAAUUUC  |
| ENSG00000175264 | AAGGCAC  |
| ENSG00000175264 | AGCAAAA  |
| ENSG00000175264 | CAGUGCA  |
| ENSG00000175264 | GAAAACA  |
| ENSG00000175264 | UCACAGU  |
| ENSG00000175264 | UUGGCAA  |
| ENSG00000175265 | GUGCAAA  |
| ENSG00000175267 | GGCAAGA  |
| ENSG00000175267 | UCCUGAG  |
| ENSG00000175274 | CUUACAG  |
| ENSG00000175274 | UACAAAG  |
| ENSG00000175274 | UUUGCAA  |
| ENSG00000175305 | CUAUACA  |
| ENSG00000175311 | GGCAUUG  |
| ENSG00000175318 | AGUGAUC  |
| ENSG00000175318 | CACAGUG  |
| ENSG00000175318 | UGAAGCU  |
| ENSG00000175329 | GCUUCCU  |
| ENSG00000175329 | GUCCAGA  |
| ENSG00000175329 | UCACACA  |
| ENSG00000175329 | UCCAGAG  |
| ENSG00000175344 | CCUGCUG  |
| ENSG00000175348 | AAAGAGG  |
| ENSG00000175348 | ACAGUAC  |
| ENSG00000175348 | ACAUCAC  |
| ENSG00000175348 | ACAUUCA  |
| ENSG00000175348 | AGUGCAA  |
| ENSG00000175348 | CACAGUG  |
| ENSG00000175348 | UACAAAG  |
| ENSG00000175348 | UCACAGU  |
| ENSG00000175348 | UGUGCUU  |
| ENSG00000175354 | AAAGUAC  |
| ENSG00000175354 | AACUACU  |
| ENSG00000175354 | CUACAAA  |
| ENSG00000175354 | UAUAAAG  |
| ENSG00000175354 | UCCUGAG  |
| ENSG00000175356 | AACUCUA  |
| ENSG00000175374 | AUAUUUAU |
| ENSG00000175376 | AAGUCAC  |
| ENSG00000175376 | CAGACAG  |
| ENSG00000175376 | CCCUGAG  |
| ENSG00000175376 | GGAAUGU  |
| ENSG00000175376 | UCCUGAG  |
| ENSG00000175387 | AAAAGUA  |
| ENSG00000175387 | AACUGGU  |
| ENSG00000175387 | AAGGUGC  |
| ENSG00000175387 | AAGUGCU  |
| ENSG00000175387 | AAUACUG  |
| ENSG00000175387 | ACAUUCA  |

|                 |         |
|-----------------|---------|
| ENSG00000175387 | ACCCUGU |
| ENSG00000175387 | ACUGUGU |
| ENSG00000175387 | AGUGCUG |
| ENSG00000175387 | AUCCCUU |
| ENSG00000175387 | AUGACAC |
| ENSG00000175387 | AUGCCUU |
| ENSG00000175387 | CACACCU |
| ENSG00000175387 | CAGUGCA |
| ENSG00000175387 | CCCUGAG |
| ENSG00000175387 | CCUGUAC |
| ENSG00000175387 | CUGGCUC |
| ENSG00000175387 | GAGGUAG |
| ENSG00000175387 | GAUUGGU |
| ENSG00000175387 | GCAGAAG |
| ENSG00000175387 | GCAUCCC |
| ENSG00000175387 | GGAAUGU |
| ENSG00000175387 | UCACAGU |
| ENSG00000175387 | UCUAGAG |
| ENSG00000175387 | UCUCAAG |
| ENSG00000175387 | UGGAUAA |
| ENSG00000175387 | UUAUGCA |
| ENSG00000175387 | UUUGCAC |
| ENSG00000175395 | AAGGCAC |
| ENSG00000175414 | AAGGCAC |
| ENSG00000175414 | AGCAGCA |
| ENSG00000175414 | AGGGAGG |
| ENSG00000175414 | GAGGCAG |
| ENSG00000175414 | GUAAACA |
| ENSG00000175416 | AAGUGUG |
| ENSG00000175416 | ACACACC |
| ENSG00000175426 | AAAAAUC |
| ENSG00000175426 | AAAGAAU |
| ENSG00000175426 | AAAGCUG |
| ENSG00000175426 | ACAUCAC |
| ENSG00000175426 | AUGCCUU |
| ENSG00000175426 | UAUAAAG |
| ENSG00000175426 | UCACAAG |
| ENSG00000175463 | AAAGUGC |
| ENSG00000175470 | AAAAACC |
| ENSG00000175470 | GGUCUAG |
| ENSG00000175482 | AGCCAGU |
| ENSG00000175482 | UGCCCUG |
| ENSG00000175497 | AACAAAC |
| ENSG00000175497 | AGCUGCC |
| ENSG00000175497 | GAAAACA |
| ENSG00000175497 | GCCCUUA |
| ENSG00000175497 | GGCAUUG |
| ENSG00000175497 | GUGACAG |
| ENSG00000175497 | UAAUAUC |
| ENSG00000175497 | UGCAAAG |
| ENSG00000175497 | UGCAGCU |
| ENSG00000175497 | UUCUGCA |
| ENSG00000175505 | CAGGAAC |
| ENSG00000175505 | CUGGGGG |
| ENSG00000175505 | GGGUGGU |
| ENSG00000175505 | GUAAACA |
| ENSG00000175505 | GUGGCC  |
| ENSG00000175505 | GUUAAUG |
| ENSG00000175518 | AGGGUUG |
| ENSG00000175518 | GGAAGCC |
| ENSG00000175538 | AGGUAGU |
| ENSG00000175538 | UUCAAAU |
| ENSG00000175538 | UUUCAAC |
| ENSG00000175544 | GGAGAGA |

|                 |          |
|-----------------|----------|
| ENSG00000175548 | CUACAAA  |
| ENSG00000175548 | GACUUCC  |
| ENSG00000175548 | UAUCAGA  |
| ENSG00000175550 | AAAUUUC  |
| ENSG00000175550 | AAGAACC  |
| ENSG00000175550 | CUGGGGG  |
| ENSG00000175556 | AUUGCAC  |
| ENSG00000175556 | UAUUGCU  |
| ENSG00000175564 | CCUGCUG  |
| ENSG00000175564 | GUCAGUU  |
| ENSG00000175564 | GUGCAAA  |
| ENSG00000175564 | UAAUAUC  |
| ENSG00000175567 | AGCAGCA  |
| ENSG00000175567 | CAGCAGA  |
| ENSG00000175567 | CAGCAGG  |
| ENSG00000175573 | GGAAGCC  |
| ENSG00000175582 | AAGUGCU  |
| ENSG00000175582 | AAUCUCA  |
| ENSG00000175582 | ACUGCAG  |
| ENSG00000175582 | AUGAUGA  |
| ENSG00000175582 | CACAAUG  |
| ENSG00000175582 | CACUCCU  |
| ENSG00000175582 | CUAGUAA  |
| ENSG00000175582 | CUAUACA  |
| ENSG00000175582 | CUCACAC  |
| ENSG00000175582 | GGAGGAG  |
| ENSG00000175582 | UACAAAG  |
| ENSG00000175582 | UAUAAAAG |
| ENSG00000175582 | UAUUACC  |
| ENSG00000175582 | UCACACA  |
| ENSG00000175582 | UCCCUCU  |
| ENSG00000175582 | UUCAAGC  |
| ENSG00000175591 | CUGGGGG  |
| ENSG00000175591 | GACCUGG  |
| ENSG00000175592 | AGCAGCA  |
| ENSG00000175592 | AGCAGCG  |
| ENSG00000175592 | GUGCAAA  |
| ENSG00000175595 | GAGGUAG  |
| ENSG00000175595 | GAGGUAU  |
| ENSG00000175602 | CCUGCUG  |
| ENSG00000175606 | AAUACUG  |
| ENSG00000175606 | AAUUUUA  |
| ENSG00000175606 | AGUGAUC  |
| ENSG00000175606 | CUUCACC  |
| ENSG00000175646 | CAGGCUC  |
| ENSG00000175662 | AAAGGUA  |
| ENSG00000175662 | AAGAACC  |
| ENSG00000175662 | ACCACAG  |
| ENSG00000175662 | AGUGCUG  |
| ENSG00000175662 | CCAGUGC  |
| ENSG00000175662 | UCCAUUA  |
| ENSG00000175662 | UUGACAC  |
| ENSG00000175699 | CUUGGAG  |
| ENSG00000175699 | GAGAAGA  |
| ENSG00000175707 | CAGCUGG  |
| ENSG00000175707 | UGAAAUG  |
| ENSG00000175727 | AAUUUUA  |
| ENSG00000175727 | AGCACCA  |
| ENSG00000175727 | CUUUGGU  |
| ENSG00000175727 | GUGACUG  |
| ENSG00000175727 | UAUUGCU  |
| ENSG00000175727 | UCCCUUG  |
| ENSG00000175727 | UCCUGAG  |
| ENSG00000175727 | UUGGUCC  |

|                 |          |
|-----------------|----------|
| ENSG00000175746 | ACUUGGA  |
| ENSG00000175746 | CUUGGAG  |
| ENSG00000175746 | GAGCUAA  |
| ENSG00000175746 | UUGUUCG  |
| ENSG00000175779 | GGCAGUG  |
| ENSG00000175782 | CUUGGGC  |
| ENSG00000175785 | ACAUUCA  |
| ENSG00000175785 | AGAUGUG  |
| ENSG00000175785 | AUAAUAC  |
| ENSG00000175785 | AUAUAAC  |
| ENSG00000175785 | AUGCAUU  |
| ENSG00000175785 | AUGGCUU  |
| ENSG00000175785 | CAAAACU  |
| ENSG00000175785 | CCUUCUG  |
| ENSG00000175785 | UGUGUGG  |
| ENSG00000175785 | UUGGCAA  |
| ENSG00000175785 | UUGGCAC  |
| ENSG00000175793 | CACAGGG  |
| ENSG00000175793 | GUGUCAC  |
| ENSG00000175793 | UCACAGG  |
| ENSG00000175826 | CAGUCUG  |
| ENSG00000175826 | GAGGCUG  |
| ENSG00000175832 | AGCACCA  |
| ENSG00000175832 | AGCAGCU  |
| ENSG00000175832 | GCCUGGG  |
| ENSG00000175854 | CUGGAAA  |
| ENSG00000175854 | CUUCUCU  |
| ENSG00000175866 | AAAACUG  |
| ENSG00000175866 | AACAAAC  |
| ENSG00000175866 | AGCACCA  |
| ENSG00000175866 | AGCAGCA  |
| ENSG00000175866 | CUGGGGG  |
| ENSG00000175866 | CUUUGGU  |
| ENSG00000175866 | GACCCUG  |
| ENSG00000175866 | GCACCAU  |
| ENSG00000175866 | GCUUCCU  |
| ENSG00000175866 | GGAAUGU  |
| ENSG00000175866 | GGAGUCC  |
| ENSG00000175866 | GGAUUUC  |
| ENSG00000175866 | GGAUUUU  |
| ENSG00000175866 | GGGGGAA  |
| ENSG00000175866 | GGGGUGG  |
| ENSG00000175866 | UGGGGGA  |
| ENSG00000175868 | AAGGCAC  |
| ENSG00000175868 | ACAAUUAU |
| ENSG00000175868 | UCACAAG  |
| ENSG00000175874 | CACAAUG  |
| ENSG00000175874 | UGAGUCU  |
| ENSG00000175893 | AAAACUG  |
| ENSG00000175893 | AAAUCCC  |
| ENSG00000175893 | AACCGU   |
| ENSG00000175893 | ACAUUAC  |
| ENSG00000175893 | AUCAUAC  |
| ENSG00000175893 | AUGAUGA  |
| ENSG00000175893 | AUUGCAC  |
| ENSG00000175893 | CCAGCAU  |
| ENSG00000175893 | GCCUGGG  |
| ENSG00000175893 | GGAGGAG  |
| ENSG00000175893 | GGGGCAG  |
| ENSG00000175893 | GGGUGGU  |
| ENSG00000175893 | GGUGGGC  |
| ENSG00000175893 | GUAAACA  |
| ENSG00000175893 | UAUUGCU  |
| ENSG00000175893 | UCCACA   |

|                 |          |
|-----------------|----------|
| ENSG00000175895 | AGCACCA  |
| ENSG00000175895 | GAGGCAG  |
| ENSG00000175898 | ACUGGCU  |
| ENSG00000175898 | AGUGCAA  |
| ENSG00000175898 | CCUUCUG  |
| ENSG00000175898 | GGGAGCU  |
| ENSG00000175898 | GUGCAA   |
| ENSG00000175898 | UCCUUGC  |
| ENSG00000175898 | UCUCAAG  |
| ENSG00000175898 | UUGGCAA  |
| ENSG00000175898 | UUGGCAC  |
| ENSG00000175906 | GAGGUAG  |
| ENSG00000175928 | AAGUCUU  |
| ENSG00000175928 | AUGGCUU  |
| ENSG00000175928 | UGUGCUU  |
| ENSG00000175931 | AAGGCAC  |
| ENSG00000175931 | ACAUAGA  |
| ENSG00000175931 | AGCUGCC  |
| ENSG00000175931 | GAGCCCC  |
| ENSG00000175931 | GUAAACA  |
| ENSG00000175931 | UCAACAG  |
| ENSG00000175938 | AAGGUGC  |
| ENSG00000175938 | ACAAGGU  |
| ENSG00000175938 | AGGGAGG  |
| ENSG00000175938 | GAAACAU  |
| ENSG00000175938 | GAGGCAG  |
| ENSG00000175938 | GGAAUGU  |
| ENSG00000175938 | GGAGGCA  |
| ENSG00000175938 | GGCAGUG  |
| ENSG00000175938 | GGGGGAA  |
| ENSG00000175938 | UGGCCAC  |
| ENSG00000175938 | UGGGGGA  |
| ENSG00000175970 | AACAUUC  |
| ENSG00000175970 | AAGGCAC  |
| ENSG00000175970 | CAGUAGA  |
| ENSG00000175970 | CCUUCUU  |
| ENSG00000175970 | UCCAGAG  |
| ENSG00000175970 | UCCUGAG  |
| ENSG00000175984 | UGAGAAU  |
| ENSG00000176018 | AAUACUG  |
| ENSG00000176018 | AAUGCCC  |
| ENSG00000176018 | AGUGCAA  |
| ENSG00000176018 | GGAAGAC  |
| ENSG00000176018 | GUAAACA  |
| ENSG00000176022 | UAUAAAAG |
| ENSG00000176049 | AUGGCUU  |
| ENSG00000176049 | CAGCAGG  |
| ENSG00000176049 | CUUUGGU  |
| ENSG00000176049 | UCAAGUA  |
| ENSG00000176058 | AGUGCUG  |
| ENSG00000176076 | AGCAGCU  |
| ENSG00000176076 | AGCUGCC  |
| ENSG00000176076 | AUGUCUG  |
| ENSG00000176076 | CCUGCUG  |
| ENSG00000176076 | GAGGCAG  |
| ENSG00000176076 | GGCUCUG  |
| ENSG00000176087 | AAGGCAC  |
| ENSG00000176087 | AGCAGCA  |
| ENSG00000176087 | AGGCAGG  |
| ENSG00000176087 | CUCUGGG  |
| ENSG00000176087 | GAGAUGA  |
| ENSG00000176087 | UCACAAG  |
| ENSG00000176087 | UCCUGU   |
| ENSG00000176102 | AGGCAGG  |

|                 |         |
|-----------------|---------|
| ENSG00000176102 | CUACAAA |
| ENSG00000176102 | GCAGGAC |
| ENSG00000176105 | AAAGCUG |
| ENSG00000176105 | AACCUGG |
| ENSG00000176105 | AAGUGCA |
| ENSG00000176105 | ACAGUAC |
| ENSG00000176105 | AGCAAAA |
| ENSG00000176105 | AGUGGUU |
| ENSG00000176105 | CACAGUG |
| ENSG00000176105 | CAGCAAA |
| ENSG00000176105 | CCCUGAG |
| ENSG00000176105 | CUAUACA |
| ENSG00000176105 | CUCCAUI |
| ENSG00000176105 | GACCCUG |
| ENSG00000176105 | GGAAUGU |
| ENSG00000176105 | GUAAACA |
| ENSG00000176105 | GUGCAAA |
| ENSG00000176105 | UCACAGU |
| ENSG00000176105 | UGCCAGC |
| ENSG00000176105 | UUGGCAC |
| ENSG00000176108 | CACCAGC |
| ENSG00000176142 | ACAUCAC |
| ENSG00000176142 | AUACAAG |
| ENSG00000176142 | CAAAACU |
| ENSG00000176142 | GAGGCAG |
| ENSG00000176142 | UAUAAAG |
| ENSG00000176142 | UGUUGAA |
| ENSG00000176148 | GUAAACA |
| ENSG00000176148 | UCCCUUG |
| ENSG00000176153 | UUAGGAU |
| ENSG00000176165 | AAAGUAA |
| ENSG00000176165 | AACAAAC |
| ENSG00000176165 | AAUCACU |
| ENSG00000176165 | ACACGGG |
| ENSG00000176165 | ACAGUAU |
| ENSG00000176165 | ACCACAG |
| ENSG00000176165 | ACUCAAA |
| ENSG00000176165 | ACUGCAG |
| ENSG00000176165 | ACUGCAU |
| ENSG00000176165 | CACAAUG |
| ENSG00000176165 | CUUACAG |
| ENSG00000176165 | GGCAGUG |
| ENSG00000176165 | GGUCUAG |
| ENSG00000176165 | UAGUGAG |
| ENSG00000176165 | UAUAAUA |
| ENSG00000176165 | UCAUAGA |
| ENSG00000176165 | UUGGUCC |
| ENSG00000176165 | UUUGCAA |
| ENSG00000176170 | AAGGCAC |
| ENSG00000176204 | AAGAACC |
| ENSG00000176204 | CCUUCAU |
| ENSG00000176204 | GGUGGUC |
| ENSG00000176204 | GGUUGUC |
| ENSG00000176204 | GGUUUAC |
| ENSG00000176204 | UCAAGUA |
| ENSG00000176204 | UCACACA |
| ENSG00000176204 | UUAGGAU |
| ENSG00000176204 | UUGGUUC |
| ENSG00000176208 | AUACAAG |
| ENSG00000176225 | UACAAAG |
| ENSG00000176244 | AUCACUA |
| ENSG00000176244 | CCUGCUG |
| ENSG00000176273 | AGCAGCG |
| ENSG00000176273 | AGCAGCU |

|                 |          |
|-----------------|----------|
| ENSG00000176274 | ACAAGGU  |
| ENSG00000176274 | ACAUUCA  |
| ENSG00000176274 | AGUGCCU  |
| ENSG00000176274 | CACAAUG  |
| ENSG00000176274 | CCCUGAG  |
| ENSG00000176274 | CUACAAA  |
| ENSG00000176274 | CUAGUAG  |
| ENSG00000176274 | GAGGAUA  |
| ENSG00000176274 | GAGGUAU  |
| ENSG00000176274 | GAGUUGA  |
| ENSG00000176274 | GUCUUGC  |
| ENSG00000176274 | UCACAUU  |
| ENSG00000176274 | UCCAGAG  |
| ENSG00000176274 | UGCUGAC  |
| ENSG00000176274 | UGUCUUU  |
| ENSG00000176274 | UUCUUGU  |
| ENSG00000176340 | UCAUGAU  |
| ENSG00000176358 | ACUGUGU  |
| ENSG00000176371 | UGCAUAG  |
| ENSG00000176381 | CUCUGGG  |
| ENSG00000176381 | UCCAGUU  |
| ENSG00000176381 | UUCAAAU  |
| ENSG00000176387 | AGCCAGU  |
| ENSG00000176387 | UCUUGAG  |
| ENSG00000176390 | CUUACAG  |
| ENSG00000176390 | GAUUGUA  |
| ENSG00000176390 | UCAUGAU  |
| ENSG00000176390 | UUCAAAU  |
| ENSG00000176406 | AUGGCUU  |
| ENSG00000176406 | CAGGCUC  |
| ENSG00000176406 | GAGAACC  |
| ENSG00000176406 | GAGAACU  |
| ENSG00000176406 | GCAACUU  |
| ENSG00000176406 | GCUGGUG  |
| ENSG00000176406 | GGCUCAG  |
| ENSG00000176406 | UCAACAG  |
| ENSG00000176406 | UGCAAAG  |
| ENSG00000176406 | UGCAGCU  |
| ENSG00000176406 | UGUCUGC  |
| ENSG00000176406 | UUCAAAU  |
| ENSG00000176407 | AAAGAAU  |
| ENSG00000176407 | AAAGCUG  |
| ENSG00000176407 | AAAUCCC  |
| ENSG00000176407 | AAGUCUU  |
| ENSG00000176407 | AAUACUG  |
| ENSG00000176407 | AAUGUUG  |
| ENSG00000176407 | ACACACC  |
| ENSG00000176407 | ACACACU  |
| ENSG00000176407 | ACAGUAC  |
| ENSG00000176407 | ACAUUAC  |
| ENSG00000176407 | ACAUUCA  |
| ENSG00000176407 | ACCACAG  |
| ENSG00000176407 | ACUGCAG  |
| ENSG00000176407 | ACUGGAU  |
| ENSG00000176407 | AGAUGUG  |
| ENSG00000176407 | AGGACAC  |
| ENSG00000176407 | AGGUUUAU |
| ENSG00000176407 | AGUAGUU  |
| ENSG00000176407 | AUAAUAC  |
| ENSG00000176407 | AUCAUAC  |
| ENSG00000176407 | AUGCACC  |
| ENSG00000176407 | AUGCAUU  |
| ENSG00000176407 | AUGUGCC  |
| ENSG00000176407 | CAAAGCA  |

|                 |         |
|-----------------|---------|
| ENSG00000176407 | CACAGGG |
| ENSG00000176407 | CACAGUG |
| ENSG00000176407 | CAGCAA  |
| ENSG00000176407 | CAGCAGA |
| ENSG00000176407 | CAGUAGU |
| ENSG00000176407 | CCAUUAC |
| ENSG00000176407 | CCCCUGG |
| ENSG00000176407 | CUCACAC |
| ENSG00000176407 | CUCUGGG |
| ENSG00000176407 | CUGCAGC |
| ENSG00000176407 | CUUGGAG |
| ENSG00000176407 | CUUGUAU |
| ENSG00000176407 | GACUUCC |
| ENSG00000176407 | GAGAACU |
| ENSG00000176407 | GAGAUGA |
| ENSG00000176407 | GAGGUAG |
| ENSG00000176407 | GAGGUAU |
| ENSG00000176407 | GCAGAAG |
| ENSG00000176407 | GCAGCAU |
| ENSG00000176407 | GGAGGCA |
| ENSG00000176407 | GGAUGAG |
| ENSG00000176407 | GGCGACA |
| ENSG00000176407 | GGGUGUU |
| ENSG00000176407 | GGUUACC |
| ENSG00000176407 | GGUUGUC |
| ENSG00000176407 | GUAACAG |
| ENSG00000176407 | GUAUUCU |
| ENSG00000176407 | GUCAACA |
| ENSG00000176407 | GUGACAG |
| ENSG00000176407 | GUGACUG |
| ENSG00000176407 | GUGCGCA |
| ENSG00000176407 | UAAUACA |
| ENSG00000176407 | UAAUAUC |
| ENSG00000176407 | UACAGUU |
| ENSG00000176407 | UAGGGCC |
| ENSG00000176407 | UAUCAGA |
| ENSG00000176407 | UCAAGUA |
| ENSG00000176407 | UCACACA |
| ENSG00000176407 | UCACAGG |
| ENSG00000176407 | UCACAGU |
| ENSG00000176407 | UCUCAAG |
| ENSG00000176407 | UCUCACC |
| ENSG00000176407 | UGAGAAG |
| ENSG00000176407 | UGAGAAU |
| ENSG00000176407 | UGGGAUC |
| ENSG00000176407 | UGUCUGG |
| ENSG00000176407 | UGUGCGG |
| ENSG00000176407 | UGUGCGU |
| ENSG00000176407 | UGUUGAA |
| ENSG00000176407 | UUAUGCA |
| ENSG00000176407 | UUCCUCG |
| ENSG00000176407 | UUGGCAA |
| ENSG00000176407 | UUGGUUC |
| ENSG00000176407 | UUUGCAA |
| ENSG00000176407 | UUUGCAC |
| ENSG00000176407 | UUUUUGC |
| ENSG00000176410 | GGUAGAC |
| ENSG00000176410 | UCUCACC |
| ENSG00000176422 | AACUGGU |
| ENSG00000176422 | AAUACUG |
| ENSG00000176422 | CACUCCU |
| ENSG00000176422 | CUCUUCC |
| ENSG00000176422 | CUUUGGU |
| ENSG00000176422 | GAGCCCC |



|                 |          |
|-----------------|----------|
| ENSG00000176422 | GAGGUAG  |
| ENSG00000176428 | CUGCCCC  |
| ENSG00000176428 | GCGGGGC  |
| ENSG00000176428 | GGCGGGG  |
| ENSG00000176438 | UCCAGUU  |
| ENSG00000176438 | UGUAUAA  |
| ENSG00000176444 | AGCACCA  |
| ENSG00000176444 | UAUAAAAG |
| ENSG00000176454 | AUAUAAC  |
| ENSG00000176454 | UACAAAG  |
| ENSG00000176463 | GAGAAAU  |
| ENSG00000176463 | UGUCUGG  |
| ENSG00000176490 | AGCACCA  |
| ENSG00000176490 | AGUGAUC  |
| ENSG00000176490 | CCCUGAG  |
| ENSG00000176490 | GGAAGAC  |
| ENSG00000176490 | UAUUGCU  |
| ENSG00000176490 | UCACAGU  |
| ENSG00000176490 | UGUGCUU  |
| ENSG00000176531 | GCGGGGC  |
| ENSG00000176531 | GGCGGGG  |
| ENSG00000176531 | UCACAGG  |
| ENSG00000176532 | AAGUGCA  |
| ENSG00000176532 | UACAGUU  |
| ENSG00000176533 | AACACUG  |
| ENSG00000176533 | AUGGCUU  |
| ENSG00000176533 | GCCUGGA  |
| ENSG00000176542 | AAAGUGC  |
| ENSG00000176542 | AAGGCAC  |
| ENSG00000176542 | AAGUGCA  |
| ENSG00000176542 | ACUGCAG  |
| ENSG00000176542 | AGCACCA  |
| ENSG00000176542 | AGUAACA  |
| ENSG00000176542 | AUGGCAC  |
| ENSG00000176542 | CACACCG  |
| ENSG00000176542 | CACACCU  |
| ENSG00000176542 | CACAGUG  |
| ENSG00000176542 | CAGCAGA  |
| ENSG00000176542 | CAGCUGG  |
| ENSG00000176542 | CCAGUGU  |
| ENSG00000176542 | CUACAGU  |
| ENSG00000176542 | CUCCAC   |
| ENSG00000176542 | CUGCAGC  |
| ENSG00000176542 | CUGCUCA  |
| ENSG00000176542 | GAAACAU  |
| ENSG00000176542 | GAAGGUC  |
| ENSG00000176542 | GAGAAAU  |
| ENSG00000176542 | GAGGUAU  |
| ENSG00000176542 | GAGUCUU  |
| ENSG00000176542 | GCACCAU  |
| ENSG00000176542 | GGAAGCC  |
| ENSG00000176542 | GGCAAGA  |
| ENSG00000176542 | GUGACUG  |
| ENSG00000176542 | UAAUACA  |
| ENSG00000176542 | UAUAAAAG |
| ENSG00000176542 | UAUUACC  |
| ENSG00000176542 | UCAAGUA  |
| ENSG00000176542 | UCACACA  |
| ENSG00000176542 | UGAGUCU  |
| ENSG00000176563 | CAGUCUG  |
| ENSG00000176563 | GUUUUCU  |
| ENSG00000176595 | GUCACUC  |
| ENSG00000176595 | UCUAGAG  |
| ENSG00000176597 | AGCACCA  |

|                 |          |
|-----------------|----------|
| ENSG00000176597 | CAUAUUG  |
| ENSG00000176597 | GACCAUG  |
| ENSG00000176597 | GUGACAG  |
| ENSG00000176619 | AAAGUUU  |
| ENSG00000176619 | AUAUUAU  |
| ENSG00000176619 | GAAACAU  |
| ENSG00000176619 | GAGCUGC  |
| ENSG00000176619 | GGCAGUG  |
| ENSG00000176619 | GGCUCAG  |
| ENSG00000176619 | UAAGACU  |
| ENSG00000176619 | UACAAAG  |
| ENSG00000176619 | UCCAGUU  |
| ENSG00000176619 | UGAAAUG  |
| ENSG00000176623 | AUCCUUU  |
| ENSG00000176623 | CUUCUCU  |
| ENSG00000176624 | AACAUUC  |
| ENSG00000176624 | AAGUCUU  |
| ENSG00000176624 | AAUACUG  |
| ENSG00000176624 | AGUGCUU  |
| ENSG00000176624 | AUAAUAC  |
| ENSG00000176624 | AUCAUAC  |
| ENSG00000176624 | CAAAACU  |
| ENSG00000176624 | CAGUGCA  |
| ENSG00000176624 | GUUAAUG  |
| ENSG00000176641 | AUGGCUU  |
| ENSG00000176641 | UAUUGCU  |
| ENSG00000176658 | AAAGUGC  |
| ENSG00000176658 | AAAGUUU  |
| ENSG00000176658 | AAGUGCU  |
| ENSG00000176658 | AGGGUCU  |
| ENSG00000176658 | AGUGCAA  |
| ENSG00000176658 | AGUGCUU  |
| ENSG00000176658 | CAAGAGC  |
| ENSG00000176658 | CUGCUCU  |
| ENSG00000176658 | CUUUGGU  |
| ENSG00000176658 | GAGGGGC  |
| ENSG00000176658 | GGCAAGA  |
| ENSG00000176658 | GGGUCUU  |
| ENSG00000176658 | GUGCUUG  |
| ENSG00000176658 | UCAUUUG  |
| ENSG00000176658 | UGCAAAG  |
| ENSG00000176658 | UGCUCAC  |
| ENSG00000176658 | UUGGCAA  |
| ENSG00000176658 | UUGGCAC  |
| ENSG00000176678 | GAGGCUG  |
| ENSG00000176678 | GUUAAUG  |
| ENSG00000176697 | AAAAACC  |
| ENSG00000176697 | AAACGGU  |
| ENSG00000176697 | AAAUCCC  |
| ENSG00000176697 | AACGGAA  |
| ENSG00000176697 | AAUGCCC  |
| ENSG00000176697 | ACCACAG  |
| ENSG00000176697 | ACUGUAG  |
| ENSG00000176697 | ACUGUUU  |
| ENSG00000176697 | AUACAAG  |
| ENSG00000176697 | AUAU AAC |
| ENSG00000176697 | AUGUAAU  |
| ENSG00000176697 | CACUGUU  |
| ENSG00000176697 | CAUGGAU  |
| ENSG00000176697 | CCUGCUG  |
| ENSG00000176697 | CUAUACA  |
| ENSG00000176697 | CUUGU AU |
| ENSG00000176697 | GACAACU  |
| ENSG00000176697 | GAGAACC  |

|                 |          |
|-----------------|----------|
| ENSG00000176697 | GAUUGUA  |
| ENSG00000176697 | GUAAACA  |
| ENSG00000176697 | GUUAAUG  |
| ENSG00000176697 | UAAUGCU  |
| ENSG00000176697 | UCAUUUG  |
| ENSG00000176697 | UCCAGAG  |
| ENSG00000176697 | UCCCUUG  |
| ENSG00000176697 | UGACAUC  |
| ENSG00000176697 | UGCAAAG  |
| ENSG00000176697 | UGUAUAA  |
| ENSG00000176697 | UGUGCGG  |
| ENSG00000176697 | UGUGCGU  |
| ENSG00000176697 | UUGGCAA  |
| ENSG00000176731 | UGAAGUG  |
| ENSG00000176749 | AAAAGUA  |
| ENSG00000176749 | AAUCCUU  |
| ENSG00000176749 | ACAAUUAU |
| ENSG00000176749 | ACACACU  |
| ENSG00000176749 | ACUGCAU  |
| ENSG00000176749 | AGCAGCG  |
| ENSG00000176749 | AGCAGCU  |
| ENSG00000176749 | AUCCUUG  |
| ENSG00000176749 | CAGUAGA  |
| ENSG00000176749 | CAGUAGU  |
| ENSG00000176749 | GAAGGAA  |
| ENSG00000176749 | GCAGCAU  |
| ENSG00000176749 | UAAUAUC  |
| ENSG00000176749 | UAUAAAG  |
| ENSG00000176749 | UCAAGUA  |
| ENSG00000176749 | UCACAGG  |
| ENSG00000176749 | UCACAGU  |
| ENSG00000176749 | UCACAUU  |
| ENSG00000176749 | UCAUAGA  |
| ENSG00000176749 | UCAUGAU  |
| ENSG00000176749 | UUGGUCC  |
| ENSG00000176749 | UUGUUCG  |
| ENSG00000176749 | UUUUUGC  |
| ENSG00000176753 | AAAGAAU  |
| ENSG00000176753 | GCUUCCU  |
| ENSG00000176769 | ACAAUUAU |
| ENSG00000176769 | AUACAAG  |
| ENSG00000176769 | AUAUUAU  |
| ENSG00000176769 | GAAACAU  |
| ENSG00000176769 | GAGAAAU  |
| ENSG00000176769 | GGUUUAC  |
| ENSG00000176769 | UACAAAG  |
| ENSG00000176769 | UGCAUAG  |
| ENSG00000176769 | UGCAUAU  |
| ENSG00000176783 | AAGGCAC  |
| ENSG00000176783 | GAGGCUG  |
| ENSG00000176783 | UUGGCAC  |
| ENSG00000176788 | AAGUAGC  |
| ENSG00000176788 | AAUACUG  |
| ENSG00000176788 | ACAGGUG  |
| ENSG00000176788 | ACUGUUU  |
| ENSG00000176788 | AUACAAG  |
| ENSG00000176788 | AUGCAUU  |
| ENSG00000176788 | GCAUCCC  |
| ENSG00000176788 | GGAAGAC  |
| ENSG00000176788 | GGAUGAG  |
| ENSG00000176788 | UAUUACC  |
| ENSG00000176788 | UUGGCAC  |
| ENSG00000176845 | AUAAUAC  |
| ENSG00000176853 | AGUGCUG  |

|                 |         |
|-----------------|---------|
| ENSG00000176853 | CUGCAGC |
| ENSG00000176853 | CUUUGGU |
| ENSG00000176853 | GAUUGUC |
| ENSG00000176853 | GGAAUGU |
| ENSG00000176853 | GUGACUG |
| ENSG00000176853 | GUGCCAC |
| ENSG00000176853 | UCUCAAG |
| ENSG00000176853 | UUGAUCA |
| ENSG00000176871 | AUAUUAU |
| ENSG00000176871 | GAGAAAU |
| ENSG00000176871 | GCAGAAG |
| ENSG00000176871 | UAUGGUU |
| ENSG00000176884 | ACAAGGU |
| ENSG00000176884 | AGCAGCA |
| ENSG00000176884 | CAGCAGG |
| ENSG00000176884 | CCAGCAU |
| ENSG00000176884 | CUCUGGG |
| ENSG00000176884 | GCAGGAC |
| ENSG00000176884 | GGCCUG  |
| ENSG00000176884 | GGUGGGC |
| ENSG00000176884 | UCCUCU  |
| ENSG00000176887 | AAACUGU |
| ENSG00000176887 | AACAUUC |
| ENSG00000176887 | AAGACAU |
| ENSG00000176887 | ACAGUAU |
| ENSG00000176887 | ACCAGCA |
| ENSG00000176887 | ACCUGGA |
| ENSG00000176887 | ACUGCAU |
| ENSG00000176887 | AGAUAAA |
| ENSG00000176887 | AGGCAGG |
| ENSG00000176887 | AGGUAGU |
| ENSG00000176887 | AGUAACA |
| ENSG00000176887 | AGUGCCU |
| ENSG00000176887 | AGUGCUG |
| ENSG00000176887 | AGUGCUU |
| ENSG00000176887 | AGUGGUU |
| ENSG00000176887 | AUAAAGU |
| ENSG00000176887 | AUACAAG |
| ENSG00000176887 | AUCCUUU |
| ENSG00000176887 | CAAAGCA |
| ENSG00000176887 | CACAGUG |
| ENSG00000176887 | CACUGUU |
| ENSG00000176887 | CAGCAGG |
| ENSG00000176887 | CAGUCUG |
| ENSG00000176887 | CAGUGCA |
| ENSG00000176887 | CCGGAGC |
| ENSG00000176887 | CUAGGCU |
| ENSG00000176887 | CUGGGGG |
| ENSG00000176887 | GAGGUAU |
| ENSG00000176887 | GAGUAUU |
| ENSG00000176887 | GAUCAGA |
| ENSG00000176887 | GCAUCC  |
| ENSG00000176887 | GCCUGAU |
| ENSG00000176887 | GCUGUCU |
| ENSG00000176887 | GGGCCCC |
| ENSG00000176887 | GGGGCAG |
| ENSG00000176887 | GGUCUAG |
| ENSG00000176887 | GUAACA  |
| ENSG00000176887 | GUAACAG |
| ENSG00000176887 | GUAGUGU |
| ENSG00000176887 | GUCAGUU |
| ENSG00000176887 | GUGCUUG |
| ENSG00000176887 | GUGGCC  |
| ENSG00000176887 | UAUAAAG |

|                 |          |
|-----------------|----------|
| ENSG00000176887 | UAUUACC  |
| ENSG00000176887 | UCACACA  |
| ENSG00000176887 | UCACAUU  |
| ENSG00000176887 | UCAUACA  |
| ENSG00000176887 | UCCAGAG  |
| ENSG00000176887 | UCCCUUG  |
| ENSG00000176887 | UGCAAAG  |
| ENSG00000176887 | UGCAUAG  |
| ENSG00000176887 | UGCAUUA  |
| ENSG00000176887 | UGGCCCU  |
| ENSG00000176887 | UGUCUGG  |
| ENSG00000176887 | UUCUGCA  |
| ENSG00000176887 | UUGGCAA  |
| ENSG00000176887 | UUUGCAA  |
| ENSG00000176903 | UGAAAUG  |
| ENSG00000176907 | ACAGUAC  |
| ENSG00000176907 | AGCAUUC  |
| ENSG00000176907 | CACAGUG  |
| ENSG00000176907 | GUAAACA  |
| ENSG00000176907 | UCACAGG  |
| ENSG00000176915 | AGCAAAA  |
| ENSG00000176928 | AGGUAGU  |
| ENSG00000176928 | GAGGUUAU |
| ENSG00000176928 | UUGGCAA  |
| ENSG00000176946 | AAAAAUC  |
| ENSG00000176946 | UUGGUUC  |
| ENSG00000176971 | ACUGGCU  |
| ENSG00000176971 | AGCCAGU  |
| ENSG00000176971 | AGUGCAA  |
| ENSG00000176971 | GUCUCUG  |
| ENSG00000176973 | AGCAGCU  |
| ENSG00000176974 | AAAGCUG  |
| ENSG00000176974 | AAAUGGU  |
| ENSG00000176974 | GGUUGUC  |
| ENSG00000176974 | GUGCUUG  |
| ENSG00000176974 | UGAAAUG  |
| ENSG00000176974 | UUCUUGU  |
| ENSG00000176974 | UUUGCAA  |
| ENSG00000176986 | AGCCCUU  |
| ENSG00000176986 | AUGCAUU  |
| ENSG00000176986 | AUUCAUU  |
| ENSG00000176986 | AUUGCAC  |
| ENSG00000176986 | CAGGCUC  |
| ENSG00000176986 | CCAGUGU  |
| ENSG00000176986 | CUGGCUC  |
| ENSG00000176986 | GAGGUAG  |
| ENSG00000176986 | GGGAGCU  |
| ENSG00000176986 | UACAAAG  |
| ENSG00000176994 | AAAAGUA  |
| ENSG00000176994 | AAGGCAC  |
| ENSG00000176994 | AAGUGCA  |
| ENSG00000176994 | AAUCCUU  |
| ENSG00000176994 | ACCCUGU  |
| ENSG00000176994 | AGGUAGU  |
| ENSG00000176994 | AGUAGAC  |
| ENSG00000176994 | AGUGCAA  |
| ENSG00000176994 | AUCCUUU  |
| ENSG00000176994 | CACAGGG  |
| ENSG00000176994 | CACAGUG  |
| ENSG00000176994 | CCCUGAG  |
| ENSG00000176994 | CUACAAA  |
| ENSG00000176994 | CUUGUGU  |
| ENSG00000176994 | GACCAUG  |
| ENSG00000176994 | GAGGUAG  |

|                 |         |
|-----------------|---------|
| ENSG00000176994 | GUCUACU |
| ENSG00000176994 | GUGCAAA |
| ENSG00000176994 | UCACAGG |
| ENSG00000176994 | UCACAGU |
| ENSG00000176994 | UCCAGUU |
| ENSG00000176994 | UCUAGAG |
| ENSG00000176994 | UGCAAAG |
| ENSG00000176994 | UUCAAAU |
| ENSG00000176994 | UUGGCAA |
| ENSG00000176994 | UUGGCAC |
| ENSG00000177000 | AGCAGCU |
| ENSG00000177000 | AGGCAGG |
| ENSG00000177000 | CAGCAGG |
| ENSG00000177000 | CAGCUGG |
| ENSG00000177000 | CUGCCCC |
| ENSG00000177000 | GGAGGCA |
| ENSG00000177000 | GGCAGCG |
| ENSG00000177000 | GGCAGGG |
| ENSG00000177000 | GGGCCCC |
| ENSG00000177000 | GGGGCAG |
| ENSG00000177034 | AAAAACC |
| ENSG00000177034 | AAGGCAC |
| ENSG00000177034 | AGCACCA |
| ENSG00000177034 | AUAAAGU |
| ENSG00000177034 | AUGUCUG |
| ENSG00000177034 | GAGAAAU |
| ENSG00000177034 | GGAUUUC |
| ENSG00000177034 | UGAGAAG |
| ENSG00000177034 | UGAGAAU |
| ENSG00000177034 | UUGGUCC |
| ENSG00000177045 | AGCACCA |
| ENSG00000177045 | CUUUGGU |
| ENSG00000177045 | GUAACAG |
| ENSG00000177045 | UAAUAGU |
| ENSG00000177045 | UUGGUCC |
| ENSG00000177051 | AGCUGCC |
| ENSG00000177051 | CUGCUCU |
| ENSG00000177051 | GAGAUGA |
| ENSG00000177051 | GCUGGUG |
| ENSG00000177051 | GGUGGGC |
| ENSG00000177051 | UAUAAAG |
| ENSG00000177051 | UCACAGG |
| ENSG00000177051 | UCACAGU |
| ENSG00000177058 | UGAGAAU |
| ENSG00000177082 | CAGCUGG |
| ENSG00000177096 | AACCUGG |
| ENSG00000177098 | AACCUGG |
| ENSG00000177098 | AAGGCAC |
| ENSG00000177098 | AAUUUUA |
| ENSG00000177098 | AGCAGCA |
| ENSG00000177098 | CCCUGAG |
| ENSG00000177098 | CUACAAA |
| ENSG00000177098 | GAGGUAG |
| ENSG00000177098 | GUGCAAA |
| ENSG00000177103 | AAAGGUA |
| ENSG00000177103 | GAAACAU |
| ENSG00000177103 | GAGAAAU |
| ENSG00000177103 | GAGAAGA |
| ENSG00000177103 | GCCCUGU |
| ENSG00000177103 | GUGCCUG |
| ENSG00000177103 | UAUUGCU |
| ENSG00000177103 | UGCCUG  |
| ENSG00000177105 | CUCAGGG |
| ENSG00000177106 | AUAAUAC |

|                 |          |
|-----------------|----------|
| ENSG00000177106 | GAGCCCC  |
| ENSG00000177108 | AUACCUC  |
| ENSG00000177108 | CAA AUGC |
| ENSG00000177108 | CAGUGCA  |
| ENSG00000177108 | CCUUCUU  |
| ENSG00000177108 | GCUGUCU  |
| ENSG00000177108 | GGGGCAG  |
| ENSG00000177108 | UGGCUGC  |
| ENSG00000177125 | AACAGUC  |
| ENSG00000177125 | AAGGCAC  |
| ENSG00000177125 | AAGUGUG  |
| ENSG00000177125 | ACAUUCA  |
| ENSG00000177125 | ACUCAA   |
| ENSG00000177125 | AGUACUG  |
| ENSG00000177125 | AUAAAGU  |
| ENSG00000177125 | AUCCUUU  |
| ENSG00000177125 | AUGACAC  |
| ENSG00000177125 | AUGGCUU  |
| ENSG00000177125 | AUUGCAC  |
| ENSG00000177125 | CACAGUG  |
| ENSG00000177125 | CCUGAG   |
| ENSG00000177125 | CUUUGGU  |
| ENSG00000177125 | GAAGGUC  |
| ENSG00000177125 | GCACCAU  |
| ENSG00000177125 | GCAGCAU  |
| ENSG00000177125 | GGCAAGA  |
| ENSG00000177125 | GUAAACA  |
| ENSG00000177125 | GUCACUC  |
| ENSG00000177125 | GUGCUUG  |
| ENSG00000177125 | UAUAAAG  |
| ENSG00000177125 | UAUUGCU  |
| ENSG00000177125 | UCCCUUU  |
| ENSG00000177125 | UGAAGUG  |
| ENSG00000177125 | UGACCUA  |
| ENSG00000177125 | UGAGAAU  |
| ENSG00000177125 | UGAGUCU  |
| ENSG00000177125 | UGCAUAG  |
| ENSG00000177125 | UGCAU AU |
| ENSG00000177125 | UGCCAGC  |
| ENSG00000177125 | UGGAUAA  |
| ENSG00000177125 | UGUGCUU  |
| ENSG00000177125 | UUCAAGC  |
| ENSG00000177125 | UUCUUGU  |
| ENSG00000177125 | UUUUUGC  |
| ENSG00000177150 | AAGGCAC  |
| ENSG00000177169 | AAAGCUG  |
| ENSG00000177169 | AAGUGCU  |
| ENSG00000177169 | AAGUGUG  |
| ENSG00000177169 | AUAAAGU  |
| ENSG00000177169 | CACAGUG  |
| ENSG00000177169 | UUCAAGC  |
| ENSG00000177189 | AAACGGU  |
| ENSG00000177189 | AAAGAGG  |
| ENSG00000177189 | AAAGCGC  |
| ENSG00000177189 | AAAGGUA  |
| ENSG00000177189 | AAAGUGC  |
| ENSG00000177189 | AAGUCAC  |
| ENSG00000177189 | AAUGUUG  |
| ENSG00000177189 | ACCAGCA  |
| ENSG00000177189 | ACUGUAG  |
| ENSG00000177189 | AGAUAAA  |
| ENSG00000177189 | AGCAAAA  |
| ENSG00000177189 | AGCACCA  |
| ENSG00000177189 | AGCUAU   |

|                 |         |
|-----------------|---------|
| ENSG00000177189 | AGUGCAA |
| ENSG00000177189 | AGUGCCU |
| ENSG00000177189 | AGUGCUU |
| ENSG00000177189 | AGUGGUU |
| ENSG00000177189 | AUAAAGU |
| ENSG00000177189 | AUACAAG |
| ENSG00000177189 | AUGCCUU |
| ENSG00000177189 | CAGCAA  |
| ENSG00000177189 | CAGCAGG |
| ENSG00000177189 | CAGCUGG |
| ENSG00000177189 | CAGGUGA |
| ENSG00000177189 | CCCACCG |
| ENSG00000177189 | CCCACCU |
| ENSG00000177189 | CUCUGGG |
| ENSG00000177189 | CUCUCC  |
| ENSG00000177189 | GAGAAGA |
| ENSG00000177189 | GAGGUAG |
| ENSG00000177189 | GCAGCAU |
| ENSG00000177189 | GCAGGUU |
| ENSG00000177189 | GCCUGU  |
| ENSG00000177189 | GGCAGCG |
| ENSG00000177189 | GGCUCUG |
| ENSG00000177189 | GGUUGAC |
| ENSG00000177189 | GUGUCAC |
| ENSG00000177189 | GUUCAUG |
| ENSG00000177189 | UACAAAG |
| ENSG00000177189 | UACAGUU |
| ENSG00000177189 | UAGACUG |
| ENSG00000177189 | UAUUGCU |
| ENSG00000177189 | UCAACAG |
| ENSG00000177189 | UCAUUCG |
| ENSG00000177189 | UCCCACC |
| ENSG00000177189 | UCCCUUG |
| ENSG00000177189 | UCCUGAG |
| ENSG00000177189 | UGGGACA |
| ENSG00000177189 | UGGGUAC |
| ENSG00000177189 | UGGUACC |
| ENSG00000177189 | UGUGCUU |
| ENSG00000177189 | UGUGUCA |
| ENSG00000177189 | UUGUGUC |
| ENSG00000177200 | AAGACAU |
| ENSG00000177200 | AAUCACU |
| ENSG00000177200 | ACAUUCA |
| ENSG00000177200 | ACUCAGC |
| ENSG00000177200 | AGCAGCA |
| ENSG00000177200 | AGCAGCG |
| ENSG00000177200 | AGCAGCU |
| ENSG00000177200 | AUAUUAU |
| ENSG00000177200 | AUCACUA |
| ENSG00000177200 | AUGAUGA |
| ENSG00000177200 | AUUCAUU |
| ENSG00000177200 | AUUGCAC |
| ENSG00000177200 | CAGUGCA |
| ENSG00000177200 | CAUGGGU |
| ENSG00000177200 | CUGGGCA |
| ENSG00000177200 | GAGGCUG |
| ENSG00000177200 | GUAACAG |
| ENSG00000177200 | UACAAAG |
| ENSG00000177200 | UAUAAUA |
| ENSG00000177200 | UGAAAUG |
| ENSG00000177200 | UGCUGAC |
| ENSG00000177239 | GUAAACA |
| ENSG00000177272 | ACUGCAU |
| ENSG00000177283 | AACAAAC |



|                 |         |
|-----------------|---------|
| ENSG00000177283 | AAGGCAC |
| ENSG00000177283 | AAUUAUU |
| ENSG00000177283 | ACCCGUA |
| ENSG00000177283 | AUAUAAC |
| ENSG00000177283 | GCCUGGA |
| ENSG00000177283 | GCCUGGG |
| ENSG00000177283 | GGGGUGC |
| ENSG00000177283 | UAAGACG |
| ENSG00000177283 | UAAGACU |
| ENSG00000177283 | UACAAAG |
| ENSG00000177283 | UGUAUAA |
| ENSG00000177300 | ACAGGUG |
| ENSG00000177300 | AUGUAAU |
| ENSG00000177300 | GUCUUGC |
| ENSG00000177301 | UAUUGCU |
| ENSG00000177303 | AACAUUC |
| ENSG00000177303 | GGAAUGU |
| ENSG00000177303 | GUUAAUG |
| ENSG00000177311 | AAAAAUC |
| ENSG00000177311 | AAUACUG |
| ENSG00000177311 | ACAGUAC |
| ENSG00000177311 | ACUGUAG |
| ENSG00000177311 | AGAUAAA |
| ENSG00000177311 | AGCAAAA |
| ENSG00000177311 | AGCCCUU |
| ENSG00000177311 | AUACAAG |
| ENSG00000177311 | CACUGUU |
| ENSG00000177311 | CAGGAAC |
| ENSG00000177311 | CCCUGAG |
| ENSG00000177311 | CUUUGGU |
| ENSG00000177311 | GCUGUCU |
| ENSG00000177311 | GGAAGAC |
| ENSG00000177311 | GGCUCUG |
| ENSG00000177311 | UACAAAG |
| ENSG00000177311 | UAGACUG |
| ENSG00000177311 | UAUAAUA |
| ENSG00000177311 | UAUCAGA |
| ENSG00000177311 | UAUUGCU |
| ENSG00000177311 | UCAAGUA |
| ENSG00000177311 | UGUAUGU |
| ENSG00000177311 | UUGGUCC |
| ENSG00000177311 | UUGUGAC |
| ENSG00000177352 | AAAGGUA |
| ENSG00000177352 | AAGUCAC |
| ENSG00000177352 | CAGUGCA |
| ENSG00000177352 | UCACAGU |
| ENSG00000177352 | UGAAAGG |
| ENSG00000177354 | ACCCAUU |
| ENSG00000177370 | CCAGGAG |
| ENSG00000177370 | UGCCCUG |
| ENSG00000177374 | AAGGCAC |
| ENSG00000177374 | AUACAAG |
| ENSG00000177374 | CACAGUG |
| ENSG00000177374 | GAGGUAG |
| ENSG00000177374 | GGCCCUG |
| ENSG00000177374 | GUGCCAC |
| ENSG00000177374 | UCACAGU |
| ENSG00000177374 | UGGCCCU |
| ENSG00000177380 | ACCCGUA |
| ENSG00000177380 | AGCAGCA |
| ENSG00000177380 | AGCAGCG |
| ENSG00000177380 | AGCAGCU |
| ENSG00000177380 | CAGUCCA |
| ENSG00000177380 | CUUGGGC |

|                 |          |
|-----------------|----------|
| ENSG00000177380 | GAAGGAA  |
| ENSG00000177380 | GCGGGGC  |
| ENSG00000177380 | GGAAGAC  |
| ENSG00000177380 | GGAAGCC  |
| ENSG00000177380 | GGCACGG  |
| ENSG00000177380 | GGCGGGG  |
| ENSG00000177380 | GGGCCCC  |
| ENSG00000177380 | UUGGUCC  |
| ENSG00000177426 | ACAGUAC  |
| ENSG00000177426 | CAGUCUG  |
| ENSG00000177426 | UCACAUU  |
| ENSG00000177427 | CUCUGGG  |
| ENSG00000177432 | AAGGCAC  |
| ENSG00000177432 | AUACAAG  |
| ENSG00000177432 | GGGUGUU  |
| ENSG00000177432 | UCACAAG  |
| ENSG00000177432 | UCACACA  |
| ENSG00000177432 | UCACAGG  |
| ENSG00000177432 | UCACAGU  |
| ENSG00000177432 | UUGGUUC  |
| ENSG00000177463 | AAAACUG  |
| ENSG00000177463 | AAACGGU  |
| ENSG00000177463 | AACCUGG  |
| ENSG00000177463 | AAGGCAC  |
| ENSG00000177463 | ACUGUAG  |
| ENSG00000177463 | AGCAUUC  |
| ENSG00000177463 | AGCUUUA  |
| ENSG00000177463 | AGUAGUU  |
| ENSG00000177463 | AGUGCUU  |
| ENSG00000177463 | AUACAAG  |
| ENSG00000177463 | CCCACCU  |
| ENSG00000177463 | GAAACAU  |
| ENSG00000177463 | GAGUUGA  |
| ENSG00000177463 | GAGUUGG  |
| ENSG00000177463 | GAUUGUA  |
| ENSG00000177463 | GCAGCAU  |
| ENSG00000177463 | GCCUGU   |
| ENSG00000177463 | GCCCUUA  |
| ENSG00000177463 | GGAGGCA  |
| ENSG00000177463 | GGCAGCG  |
| ENSG00000177463 | GGCCUG   |
| ENSG00000177463 | GUCUCUG  |
| ENSG00000177463 | UAAUACA  |
| ENSG00000177463 | UAGGUUA  |
| ENSG00000177463 | UCAUUCG  |
| ENSG00000177463 | UGAAAUG  |
| ENSG00000177463 | UGAGAAG  |
| ENSG00000177463 | UGCUGAC  |
| ENSG00000177463 | UUCUAAU  |
| ENSG00000177464 | UGCAUAG  |
| ENSG00000177464 | UGCAUUA  |
| ENSG00000177465 | GUCAACA  |
| ENSG00000177468 | AACAAAC  |
| ENSG00000177468 | AACACUG  |
| ENSG00000177468 | AAUCCUU  |
| ENSG00000177468 | AAUCUCA  |
| ENSG00000177468 | ACAAGGU  |
| ENSG00000177468 | AUAU AAC |
| ENSG00000177468 | AUCCUUG  |
| ENSG00000177468 | AUGCAUU  |
| ENSG00000177468 | AUUCAUU  |
| ENSG00000177468 | GAGUGUG  |
| ENSG00000177468 | UGAAAUG  |
| ENSG00000177468 | UGACCUA  |

|                 |         |
|-----------------|---------|
| ENSG00000177469 | AGCACCA |
| ENSG00000177469 | AGGACAC |
| ENSG00000177469 | CACCAGC |
| ENSG00000177469 | CCUGCUG |
| ENSG00000177469 | CUCACAC |
| ENSG00000177469 | CUGCCCC |
| ENSG00000177469 | CUGCUCA |
| ENSG00000177469 | GCAGGUU |
| ENSG00000177469 | UGCUCAC |
| ENSG00000177469 | UUGUGUC |
| ENSG00000177479 | ACCCUGU |
| ENSG00000177479 | AGCCUGC |
| ENSG00000177479 | CCAGUGU |
| ENSG00000177479 | GGCCUG  |
| ENSG00000177479 | GGGGGAA |
| ENSG00000177479 | UCCCUCU |
| ENSG00000177485 | AAAAACC |
| ENSG00000177485 | AAGUGCU |
| ENSG00000177485 | AGCAGCA |
| ENSG00000177485 | AUGAGCU |
| ENSG00000177485 | CUAGGCU |
| ENSG00000177485 | GAAAACA |
| ENSG00000177485 | GACCCUG |
| ENSG00000177508 | CAAAGUG |
| ENSG00000177508 | CUAUACA |
| ENSG00000177511 | AAGUGCU |
| ENSG00000177511 | ACAUUCA |
| ENSG00000177511 | AGUACUG |
| ENSG00000177511 | AGUGCUG |
| ENSG00000177511 | CUACAGU |
| ENSG00000177511 | CUGUUGA |
| ENSG00000177511 | GCAGCAU |
| ENSG00000177511 | GGCAGUG |
| ENSG00000177511 | GGCAUUG |
| ENSG00000177511 | GGGGCAG |
| ENSG00000177511 | GGUCUAG |
| ENSG00000177511 | UCACACA |
| ENSG00000177511 | UCAUUUG |
| ENSG00000177511 | UGGCCAC |
| ENSG00000177511 | UGUCUUU |
| ENSG00000177511 | UUCUGCA |
| ENSG00000177519 | CCCACCU |
| ENSG00000177519 | GUGUCAC |
| ENSG00000177542 | AAAACUG |
| ENSG00000177542 | AGCACCA |
| ENSG00000177542 | AGCAGCA |
| ENSG00000177542 | AGCAGCU |
| ENSG00000177542 | AGGUAGU |
| ENSG00000177542 | GAGCCCC |
| ENSG00000177542 | GGAAUGU |
| ENSG00000177542 | GUAGUGU |
| ENSG00000177548 | UUGGUUC |
| ENSG00000177551 | AAAAACC |
| ENSG00000177551 | AAGUGCU |
| ENSG00000177551 | AAUUAUU |
| ENSG00000177551 | AGUGCAA |
| ENSG00000177551 | UCACCAC |
| ENSG00000177551 | UGAAGUG |
| ENSG00000177551 | UUGGCAC |
| ENSG00000177556 | UUGGUCC |
| ENSG00000177565 | AAAGCUG |
| ENSG00000177565 | AAUACUG |
| ENSG00000177565 | AAUUAUU |
| ENSG00000177565 | ACUCAA  |

|                 |         |
|-----------------|---------|
| ENSG00000177565 | ACUCAGC |
| ENSG00000177565 | ACUGGCC |
| ENSG00000177565 | AGUGCUU |
| ENSG00000177565 | AUGGCUU |
| ENSG00000177565 | AUGUGCC |
| ENSG00000177565 | CAGCAGA |
| ENSG00000177565 | CAGCAGG |
| ENSG00000177565 | CAGUGCA |
| ENSG00000177565 | CCAGGAG |
| ENSG00000177565 | CCAGUGU |
| ENSG00000177565 | CUAGUAG |
| ENSG00000177565 | CUGGACU |
| ENSG00000177565 | GGACCUG |
| ENSG00000177565 | GGACUGC |
| ENSG00000177565 | GGGAGCU |
| ENSG00000177565 | UAUUGCU |
| ENSG00000177565 | UCAUAGA |
| ENSG00000177565 | UCUGGAA |
| ENSG00000177565 | UCUGGAG |
| ENSG00000177565 | UGCAAAG |
| ENSG00000177565 | UGGACUG |
| ENSG00000177565 | UGGCUGC |
| ENSG00000177565 | UUCAAAU |
| ENSG00000177565 | UUGUGUC |
| ENSG00000177565 | UUUGCAC |
| ENSG00000177570 | AACAGUC |
| ENSG00000177570 | AAGACAU |
| ENSG00000177570 | AAUUAUU |
| ENSG00000177570 | ACAUUCA |
| ENSG00000177570 | AGCAAAA |
| ENSG00000177570 | AGCAGCU |
| ENSG00000177570 | AGCUGCC |
| ENSG00000177570 | AGUGCUU |
| ENSG00000177570 | AUGUGCC |
| ENSG00000177570 | AUUCAUU |
| ENSG00000177570 | CACAGUG |
| ENSG00000177570 | CAGCAGA |
| ENSG00000177570 | CAGUCUG |
| ENSG00000177570 | CCAGUAC |
| ENSG00000177570 | CUGCAGC |
| ENSG00000177570 | GAGGUAG |
| ENSG00000177570 | GCAGAAG |
| ENSG00000177570 | GCUGGUG |
| ENSG00000177570 | GGAGAGA |
| ENSG00000177570 | GGCAGGG |
| ENSG00000177570 | GUCAUUG |
| ENSG00000177570 | GUGACAG |
| ENSG00000177570 | GUGGCC  |
| ENSG00000177570 | UAGAGGA |
| ENSG00000177570 | UCAACAG |
| ENSG00000177570 | UCAUUUG |
| ENSG00000177570 | UCCUGAG |
| ENSG00000177570 | UGAAGCU |
| ENSG00000177570 | UGCAAAG |
| ENSG00000177570 | UGCUGAC |
| ENSG00000177570 | UUGGCAA |
| ENSG00000177570 | UUGGCAC |
| ENSG00000177570 | UUUGCAA |
| ENSG00000177570 | UUUGCAC |
| ENSG00000177575 | ACAUUCA |
| ENSG00000177575 | AGCAGCA |
| ENSG00000177575 | UCACAUU |
| ENSG00000177606 | AAUCUCU |
| ENSG00000177606 | AGGCAGG |

|                 |         |
|-----------------|---------|
| ENSG00000177606 | CUGGAAA |
| ENSG00000177606 | CUGGGCA |
| ENSG00000177606 | GUUAGGA |
| ENSG00000177606 | UAAUACA |
| ENSG00000177606 | UAUUACC |
| ENSG00000177606 | UUGUGAC |
| ENSG00000177613 | AAGUGUG |
| ENSG00000177613 | UUUUUGC |
| ENSG00000177614 | AAAAGUA |
| ENSG00000177614 | AACCUGG |
| ENSG00000177614 | AACCUGU |
| ENSG00000177614 | AGUGCUU |
| ENSG00000177614 | CAGGCUC |
| ENSG00000177614 | CUCCAUI |
| ENSG00000177614 | GUGGGGA |
| ENSG00000177614 | UCUCCA  |
| ENSG00000177666 | AAGGCAC |
| ENSG00000177674 | GGCAGUG |
| ENSG00000177685 | AGCAGCA |
| ENSG00000177685 | CUGGGGG |
| ENSG00000177688 | AGCAAAA |
| ENSG00000177694 | AACAUUC |
| ENSG00000177694 | ACAUUCA |
| ENSG00000177694 | AGUGGUU |
| ENSG00000177694 | AUGGCUU |
| ENSG00000177694 | CAAAGCA |
| ENSG00000177694 | GGAAUGU |
| ENSG00000177694 | GGCUCUG |
| ENSG00000177694 | GUCCAGA |
| ENSG00000177697 | AAGGCAC |
| ENSG00000177697 | CAGUAGU |
| ENSG00000177697 | UGAAGCU |
| ENSG00000177728 | AAAUGGU |
| ENSG00000177728 | CCAGUAC |
| ENSG00000177728 | UCCAGUU |
| ENSG00000177732 | ACAGGUG |
| ENSG00000177732 | ACCACAG |
| ENSG00000177732 | AGCACCA |
| ENSG00000177732 | AGGUAGU |
| ENSG00000177732 | AUGUAAU |
| ENSG00000177732 | AUGUCUG |
| ENSG00000177732 | CACAGGG |
| ENSG00000177732 | CAGACAG |
| ENSG00000177732 | CAGUCCA |
| ENSG00000177732 | CCAGUGC |
| ENSG00000177732 | CCUGCUG |
| ENSG00000177732 | CCUGUAC |
| ENSG00000177732 | CUCUGGG |
| ENSG00000177732 | CUUCACC |
| ENSG00000177732 | GAGACCU |
| ENSG00000177732 | GAGGCAG |
| ENSG00000177732 | GAGUGUG |
| ENSG00000177732 | GCUGGUG |
| ENSG00000177732 | GGAGGCA |
| ENSG00000177732 | GGCAGGG |
| ENSG00000177732 | GGCGGGG |
| ENSG00000177732 | GGGAACG |
| ENSG00000177732 | GGGCGUG |
| ENSG00000177732 | GGGGCAG |
| ENSG00000177732 | GGGGUCC |
| ENSG00000177732 | GGGGUGG |
| ENSG00000177732 | GUAAACA |
| ENSG00000177732 | GUAUGUU |
| ENSG00000177732 | GUGAAUG |

|                 |         |
|-----------------|---------|
| ENSG00000177732 | GUGCAA  |
| ENSG00000177732 | GUGGCC  |
| ENSG00000177732 | UAGUGAG |
| ENSG00000177732 | UCCACA  |
| ENSG00000177732 | UCCUGAG |
| ENSG00000177732 | UCUCAA  |
| ENSG00000177732 | UGCCAGC |
| ENSG00000177732 | UGGGGA  |
| ENSG00000177732 | UGUAUGU |
| ENSG00000177732 | UGUCUGC |
| ENSG00000177732 | UGUCUGG |
| ENSG00000177732 | UGUCUUU |
| ENSG00000177732 | UGUGUGG |
| ENSG00000177732 | UUGUGUC |
| ENSG00000177732 | UUGUUCG |
| ENSG00000177733 | CACAAUG |
| ENSG00000177733 | CUACAAA |
| ENSG00000177733 | UGGGAUC |
| ENSG00000177764 | AAAGUUU |
| ENSG00000177764 | AAGUGUG |
| ENSG00000177764 | ACAUUCA |
| ENSG00000177764 | AGCUUAU |
| ENSG00000177764 | AGGUAGU |
| ENSG00000177764 | AUGGCUU |
| ENSG00000177764 | GAGGUAG |
| ENSG00000177764 | GGGUCC  |
| ENSG00000177764 | UGAAGUG |
| ENSG00000177764 | UGGCCAC |
| ENSG00000177764 | UUGGCAA |
| ENSG00000177807 | AAGUGCA |
| ENSG00000177807 | CCUUCUG |
| ENSG00000177807 | GAGUCUU |
| ENSG00000177807 | GCCCUGU |
| ENSG00000177807 | GUCUUGC |
| ENSG00000177807 | UGCCUG  |
| ENSG00000177807 | UUGAUCA |
| ENSG00000177853 | AAGUGCU |
| ENSG00000177853 | ACAGUAC |
| ENSG00000177853 | ACAUUAC |
| ENSG00000177853 | AGUAGAC |
| ENSG00000177853 | AGUGCAA |
| ENSG00000177853 | CCCUGAG |
| ENSG00000177853 | UACAGUU |
| ENSG00000177853 | UCACAUU |
| ENSG00000177853 | UGACAUC |
| ENSG00000177853 | UGAUCCA |
| ENSG00000177853 | UGCAUAG |
| ENSG00000177853 | UUAUGCA |
| ENSG00000177879 | GUAAACA |
| ENSG00000177885 | AAAAACC |
| ENSG00000177885 | AAAGCUG |
| ENSG00000177885 | AAAUGGU |
| ENSG00000177885 | AAGGCAC |
| ENSG00000177885 | ACACACC |
| ENSG00000177885 | ACACACU |
| ENSG00000177885 | ACAUAGA |
| ENSG00000177885 | ACCAGCA |
| ENSG00000177885 | AUCACUA |
| ENSG00000177885 | AUUCAUU |
| ENSG00000177885 | CACAGUG |
| ENSG00000177885 | CAGCAA  |
| ENSG00000177885 | CCCACCG |
| ENSG00000177885 | CCCACCU |
| ENSG00000177885 | CUGGACU |

|                 |          |
|-----------------|----------|
| ENSG00000177885 | GGACUGC  |
| ENSG00000177885 | GGCAUUG  |
| ENSG00000177885 | UCCCACC  |
| ENSG00000177885 | UGCAUUAU |
| ENSG00000177885 | UGGACUG  |
| ENSG00000177885 | UUGGCAA  |
| ENSG00000177885 | UUGGCAC  |
| ENSG00000177885 | UUUGCAA  |
| ENSG00000177885 | UUUGCAC  |
| ENSG00000177888 | AAGAACC  |
| ENSG00000177888 | AAGGCAC  |
| ENSG00000177888 | ACAUUCA  |
| ENSG00000177888 | AGCACCA  |
| ENSG00000177888 | AGCAGCA  |
| ENSG00000177888 | AGCAGCG  |
| ENSG00000177888 | AGGACAC  |
| ENSG00000177888 | AGGCAGG  |
| ENSG00000177888 | AGUGGUU  |
| ENSG00000177888 | GAGUAUU  |
| ENSG00000177888 | GGAAUGU  |
| ENSG00000177888 | GGAGUGU  |
| ENSG00000177888 | GUGCCAC  |
| ENSG00000177888 | GUGCUUG  |
| ENSG00000177888 | UGUGCUU  |
| ENSG00000177888 | UUGACAC  |
| ENSG00000177888 | UUGGCAA  |
| ENSG00000177888 | UUGGUUC  |
| ENSG00000177889 | AAAUGGU  |
| ENSG00000177889 | AACAAAC  |
| ENSG00000177889 | AAUCACU  |
| ENSG00000177889 | AAUGUUG  |
| ENSG00000177889 | ACUGUGU  |
| ENSG00000177889 | AGCUGCC  |
| ENSG00000177889 | AUGUCUG  |
| ENSG00000177889 | CCUUCAU  |
| ENSG00000177889 | CUGCAGC  |
| ENSG00000177889 | GAUUGUC  |
| ENSG00000177889 | UAAGACU  |
| ENSG00000177889 | UACAAAG  |
| ENSG00000177889 | UAGUGAG  |
| ENSG00000177889 | UCACAAG  |
| ENSG00000177889 | UCACAGG  |
| ENSG00000177889 | UCAUUCG  |
| ENSG00000177889 | UGCAGCU  |
| ENSG00000177889 | UGUCUGG  |
| ENSG00000177917 | CCAGUGU  |
| ENSG00000177917 | GUAAACA  |
| ENSG00000177917 | UCAAGUA  |
| ENSG00000177951 | CUUUGGU  |
| ENSG00000177963 | AGCACCA  |
| ENSG00000177963 | AGCAGCA  |
| ENSG00000177963 | CUGGAAA  |
| ENSG00000177963 | GGAAGCC  |
| ENSG00000177963 | UCUGGAA  |
| ENSG00000177981 | ACUGCAG  |
| ENSG00000177981 | GAAAACA  |
| ENSG00000177981 | GAGAAAU  |
| ENSG00000177981 | GGAUUUU  |
| ENSG00000177981 | UGCAUAG  |
| ENSG00000177981 | UGCAUUAU |
| ENSG00000177981 | UGUGUCA  |
| ENSG00000177981 | UUCCUAG  |
| ENSG00000177981 | UUGUGAC  |
| ENSG00000177981 | UUUGCAC  |

|                 |         |
|-----------------|---------|
| ENSG00000177981 | UUUUUGC |
| ENSG00000177994 | AAGUUGU |
| ENSG00000178031 | AACAAAC |
| ENSG00000178031 | AACAUUC |
| ENSG00000178031 | AAUUAAU |
| ENSG00000178031 | CAGGAAC |
| ENSG00000178031 | CUGCAGG |
| ENSG00000178031 | UAAUAUC |
| ENSG00000178031 | UACAGUU |
| ENSG00000178031 | UCACAAG |
| ENSG00000178031 | UCACAGG |
| ENSG00000178031 | UCACAGU |
| ENSG00000178031 | UCUGGAA |
| ENSG00000178031 | UCUGGAG |
| ENSG00000178031 | UUAGAGA |
| ENSG00000178031 | UUGUGUC |
| ENSG00000178033 | AAUUUUA |
| ENSG00000178033 | UGAGUCU |
| ENSG00000178033 | UGUCUUU |
| ENSG00000178053 | AGCACCA |
| ENSG00000178053 | CAAUUGC |
| ENSG00000178053 | GAUUGGU |
| ENSG00000178053 | GCACCAU |
| ENSG00000178074 | AAAGAAU |
| ENSG00000178074 | CUCAAAC |
| ENSG00000178074 | GCAGAAG |
| ENSG00000178074 | UCUCAAG |
| ENSG00000178074 | UCUGGAG |
| ENSG00000178074 | UGCAUUG |
| ENSG00000178074 | UGGCCAC |
| ENSG00000178074 | UUGGUCC |
| ENSG00000178074 | UUUGCAA |
| ENSG00000178074 | UUUGCAC |
| ENSG00000178075 | UCACAGG |
| ENSG00000178075 | UCACAGU |
| ENSG00000178104 | CUCAAAC |
| ENSG00000178104 | UCCUGU  |
| ENSG00000178149 | AACAUUC |
| ENSG00000178149 | CAGACAG |
| ENSG00000178163 | AGCAGCA |
| ENSG00000178163 | CCUUCAU |
| ENSG00000178163 | GUGCUUG |
| ENSG00000178163 | UAUAAAG |
| ENSG00000178163 | UCUAGAG |
| ENSG00000178163 | UGUGCUU |
| ENSG00000178163 | UUCUGCA |
| ENSG00000178171 | GAGGUAG |
| ENSG00000178177 | AAGUCUU |
| ENSG00000178177 | AGCACCA |
| ENSG00000178177 | AGGUAGU |
| ENSG00000178177 | AGUGCAA |
| ENSG00000178177 | AUAUUAU |
| ENSG00000178177 | CACAGGG |
| ENSG00000178177 | CAUGGGU |
| ENSG00000178177 | GAGGUAG |
| ENSG00000178177 | GGCUCUG |
| ENSG00000178177 | GUAAACA |
| ENSG00000178177 | GUGCUUG |
| ENSG00000178177 | UAAUAUC |
| ENSG00000178177 | UCACAGG |
| ENSG00000178177 | UGCUGAC |
| ENSG00000178184 | ACCAGCA |
| ENSG00000178184 | AGCAGCU |
| ENSG00000178184 | CAGCAGG |



|                 |         |
|-----------------|---------|
| ENSG00000178184 | UCACAUU |
| ENSG00000178184 | UUGGUCC |
| ENSG00000178188 | AGAUAAA |
| ENSG00000178188 | AGUACUG |
| ENSG00000178188 | CUCUUCC |
| ENSG00000178188 | GGGGUGG |
| ENSG00000178188 | GUAGUGU |
| ENSG00000178188 | UGGCUGC |
| ENSG00000178202 | GAGUGUG |
| ENSG00000178202 | GGAGUGU |
| ENSG00000178202 | UAUCAGA |
| ENSG00000178202 | UCACAGG |
| ENSG00000178202 | UCACAGU |
| ENSG00000178217 | AAAACUG |
| ENSG00000178217 | AAAGCUG |
| ENSG00000178217 | ACAAGGU |
| ENSG00000178217 | AUUCAUU |
| ENSG00000178217 | CAAAGCA |
| ENSG00000178217 | CAGACAG |
| ENSG00000178217 | CAGGAAC |
| ENSG00000178217 | CCAGGAG |
| ENSG00000178217 | CUCACAC |
| ENSG00000178217 | GACAACU |
| ENSG00000178217 | GUGACAG |
| ENSG00000178217 | UAUAUGA |
| ENSG00000178217 | UCAUUCG |
| ENSG00000178217 | UCCAGAG |
| ENSG00000178217 | UCUCAAG |
| ENSG00000178217 | UGAGAAU |
| ENSG00000178217 | UUCAAAU |
| ENSG00000178235 | AGUGCUG |
| ENSG00000178235 | AUGCCUU |
| ENSG00000178235 | AUGGCAC |
| ENSG00000178235 | CUGGAAA |
| ENSG00000178235 | GAAAACA |
| ENSG00000178235 | GCAGCAU |
| ENSG00000178235 | GCUUCCU |
| ENSG00000178235 | UCGUGCA |
| ENSG00000178235 | UGCUGAC |
| ENSG00000178252 | CAGACAG |
| ENSG00000178252 | CAGGAAC |
| ENSG00000178252 | GGAAUGU |
| ENSG00000178301 | GAGUCUU |
| ENSG00000178403 | AAAGUGC |
| ENSG00000178403 | AACCUGG |
| ENSG00000178403 | AACCUGU |
| ENSG00000178403 | AAGUGCA |
| ENSG00000178403 | CUACAAA |
| ENSG00000178403 | GACUUCC |
| ENSG00000178403 | UCCCACA |
| ENSG00000178425 | CCCUGAG |
| ENSG00000178449 | CAGGUGA |
| ENSG00000178449 | CUGCUCU |
| ENSG00000178537 | UCAAGUA |
| ENSG00000178538 | AAAGUUU |
| ENSG00000178538 | UGUCUUU |
| ENSG00000178562 | AAGUGUG |
| ENSG00000178562 | GACUUCC |
| ENSG00000178562 | GAGCCCU |
| ENSG00000178562 | GGCAAGA |
| ENSG00000178562 | GGCUCAG |
| ENSG00000178562 | UCCAGAG |
| ENSG00000178562 | UCCAGUU |
| ENSG00000178562 | UCCUAUA |

|                 |          |
|-----------------|----------|
| ENSG00000178562 | UCUGGAA  |
| ENSG00000178562 | UUCCAUA  |
| ENSG00000178562 | UUGGUUC  |
| ENSG00000178567 | AAGUGUG  |
| ENSG00000178567 | AAUCCUU  |
| ENSG00000178567 | AGCAAAA  |
| ENSG00000178567 | AGUGUGC  |
| ENSG00000178567 | AUCCUUG  |
| ENSG00000178567 | CAGUCCA  |
| ENSG00000178567 | CUAUACA  |
| ENSG00000178568 | AACAAAC  |
| ENSG00000178568 | AAGUGCU  |
| ENSG00000178568 | ACCAGCA  |
| ENSG00000178568 | ACCCAUA  |
| ENSG00000178568 | AGCUGCC  |
| ENSG00000178568 | AGUAGAC  |
| ENSG00000178568 | AGUAGUU  |
| ENSG00000178568 | AGUGCAA  |
| ENSG00000178568 | AGUGCUU  |
| ENSG00000178568 | AUACAAG  |
| ENSG00000178568 | AUCCUUG  |
| ENSG00000178568 | AUGUGCC  |
| ENSG00000178568 | CAAAGUG  |
| ENSG00000178568 | CAA AUGC |
| ENSG00000178568 | CAAGAGC  |
| ENSG00000178568 | CACAAUG  |
| ENSG00000178568 | CACUCCU  |
| ENSG00000178568 | CCAGUGC  |
| ENSG00000178568 | CCAGUGU  |
| ENSG00000178568 | CCCUGAG  |
| ENSG00000178568 | CCCUGUC  |
| ENSG00000178568 | CGACCCA  |
| ENSG00000178568 | GAGGCAG  |
| ENSG00000178568 | GCAACUU  |
| ENSG00000178568 | GCUGGUG  |
| ENSG00000178568 | GGCAUUG  |
| ENSG00000178568 | GUAACAG  |
| ENSG00000178568 | UACAAAG  |
| ENSG00000178568 | UAUUACC  |
| ENSG00000178568 | UAUUGCU  |
| ENSG00000178568 | UCACACA  |
| ENSG00000178568 | UCAUGAU  |
| ENSG00000178568 | UCCUGU   |
| ENSG00000178568 | UCUCAAG  |
| ENSG00000178568 | UGAGAAG  |
| ENSG00000178568 | UGAGAAU  |
| ENSG00000178568 | UGUGCUU  |
| ENSG00000178568 | UUAUGCA  |
| ENSG00000178568 | UUCCAUA  |
| ENSG00000178568 | UUGGCAA  |
| ENSG00000178568 | UUGGCAC  |
| ENSG00000178573 | AACACUG  |
| ENSG00000178573 | AACAGUC  |
| ENSG00000178573 | AACUCUA  |
| ENSG00000178573 | AAGACAU  |
| ENSG00000178573 | AAGUUGU  |
| ENSG00000178573 | AAUACUG  |
| ENSG00000178573 | AAUGCCC  |
| ENSG00000178573 | AAUUAUU  |
| ENSG00000178573 | ACAUCAC  |
| ENSG00000178573 | AGGAUGU  |
| ENSG00000178573 | AGGUUAU  |
| ENSG00000178573 | AGUAACA  |
| ENSG00000178573 | AUAAAGU  |

|                 |         |
|-----------------|---------|
| ENSG00000178573 | AUAUAAC |
| ENSG00000178573 | AUGUAAU |
| ENSG00000178573 | CAGCAA  |
| ENSG00000178573 | CAGUCCA |
| ENSG00000178573 | CAGUGCA |
| ENSG00000178573 | CCAGCAU |
| ENSG00000178573 | CCCUGAG |
| ENSG00000178573 | CUACAGU |
| ENSG00000178573 | CUUUGGU |
| ENSG00000178573 | GAAACAU |
| ENSG00000178573 | GAAGGUC |
| ENSG00000178573 | GAGAUGA |
| ENSG00000178573 | GAGGCAG |
| ENSG00000178573 | GCACCAU |
| ENSG00000178573 | GCAGGUU |
| ENSG00000178573 | GGAUUUC |
| ENSG00000178573 | GUAAACA |
| ENSG00000178573 | GUCCAGA |
| ENSG00000178573 | GUCUCUG |
| ENSG00000178573 | UAAUACA |
| ENSG00000178573 | UAAUAUC |
| ENSG00000178573 | UAGACUG |
| ENSG00000178573 | UAUAAAG |
| ENSG00000178573 | UAUAUGA |
| ENSG00000178573 | UCCAGUU |
| ENSG00000178573 | UUCUGCA |
| ENSG00000178573 | UUGACAC |
| ENSG00000178573 | UUGGCAA |
| ENSG00000178573 | UUGGCAC |
| ENSG00000178573 | UUGGUUC |
| ENSG00000178573 | UUUCAAC |
| ENSG00000178585 | AAAAAUC |
| ENSG00000178585 | ACCCUGU |
| ENSG00000178585 | AGCACCA |
| ENSG00000178585 | AGCAGCA |
| ENSG00000178585 | AUAUAAC |
| ENSG00000178585 | AUCCCUU |
| ENSG00000178585 | AUUGCAC |
| ENSG00000178585 | CCCUGUU |
| ENSG00000178585 | GCUGGUG |
| ENSG00000178585 | GGAAGCC |
| ENSG00000178585 | GGGGUGG |
| ENSG00000178585 | GUUAAUG |
| ENSG00000178585 | UCAAGUA |
| ENSG00000178585 | UCCCUUU |
| ENSG00000178585 | UGACCUA |
| ENSG00000178585 | UGCAAAG |
| ENSG00000178585 | UUCAAGC |
| ENSG00000178585 | UUGUGUC |
| ENSG00000178585 | UUUCAAC |
| ENSG00000178607 | AAGGCAC |
| ENSG00000178645 | CCUUCAU |
| ENSG00000178685 | CCCCUGG |
| ENSG00000178685 | UGCUGAC |
| ENSG00000178691 | AAAGCUG |
| ENSG00000178691 | ACCACAG |
| ENSG00000178691 | AGCAGCA |
| ENSG00000178691 | CACAGUG |
| ENSG00000178691 | CAGUAGU |
| ENSG00000178691 | GCAGCAU |
| ENSG00000178691 | GCUAGCA |
| ENSG00000178691 | UCACAGU |
| ENSG00000178695 | AAGGCAC |
| ENSG00000178695 | AAGUCAC |

|                 |          |
|-----------------|----------|
| ENSG00000178695 | ACAGUAC  |
| ENSG00000178695 | AUACAAG  |
| ENSG00000178695 | CCUUCUG  |
| ENSG00000178695 | CUACAGU  |
| ENSG00000178695 | CUUUGGU  |
| ENSG00000178695 | UACAAAG  |
| ENSG00000178695 | UAUUGCU  |
| ENSG00000178695 | UCCCACC  |
| ENSG00000178695 | UGCUCAC  |
| ENSG00000178695 | UUGGUUC  |
| ENSG00000178718 | CUCAGGG  |
| ENSG00000178718 | UGAAAGG  |
| ENSG00000178726 | AGCUUAU  |
| ENSG00000178726 | UUCCUAG  |
| ENSG00000178726 | UUCUUGU  |
| ENSG00000178732 | UGAAAUG  |
| ENSG00000178741 | AAGUAGC  |
| ENSG00000178741 | UCAAGUA  |
| ENSG00000178741 | UUCAAAU  |
| ENSG00000178761 | AAGGCAC  |
| ENSG00000178761 | AUAAAAGU |
| ENSG00000178761 | GCUGGUG  |
| ENSG00000178761 | UCCCUCU  |
| ENSG00000178761 | UGAGAAG  |
| ENSG00000178764 | AAAGGUA  |
| ENSG00000178764 | AAAGUGC  |
| ENSG00000178764 | AAGUGCA  |
| ENSG00000178764 | ACUCAAA  |
| ENSG00000178764 | AGCCCUU  |
| ENSG00000178764 | AGGUUAU  |
| ENSG00000178764 | CAGUAGU  |
| ENSG00000178764 | CCAGUAC  |
| ENSG00000178764 | GGAGUCC  |
| ENSG00000178764 | GUUAGGA  |
| ENSG00000178764 | UAUAAAAG |
| ENSG00000178764 | UCCAGUU  |
| ENSG00000178764 | UUGGCAA  |
| ENSG00000178772 | UGCAAAG  |
| ENSG00000178772 | UUUGCAA  |
| ENSG00000178776 | CUGGAAA  |
| ENSG00000178776 | GAGAACU  |
| ENSG00000178802 | AGUGAUC  |
| ENSG00000178802 | CUGGCUC  |
| ENSG00000178802 | GGCUCAG  |
| ENSG00000178826 | ACUCAAA  |
| ENSG00000178826 | GAAAACA  |
| ENSG00000178860 | AAAUUUC  |
| ENSG00000178860 | AUUCAUU  |
| ENSG00000178860 | CUGGCUC  |
| ENSG00000178878 | AACACUG  |
| ENSG00000178878 | AGUAGAC  |
| ENSG00000178878 | AUCCUUU  |
| ENSG00000178878 | CAAAGCA  |
| ENSG00000178878 | CAGACAG  |
| ENSG00000178878 | CCUUCAU  |
| ENSG00000178878 | CUUACAG  |
| ENSG00000178878 | GGGCCCC  |
| ENSG00000178878 | GUGCAAA  |
| ENSG00000178904 | GGCAAGA  |
| ENSG00000178904 | UCACAGU  |
| ENSG00000178904 | UGUGCUU  |
| ENSG00000178904 | UUGGCAA  |
| ENSG00000178919 | AAAGAGG  |
| ENSG00000178919 | ACUAGAU  |

|                 |          |
|-----------------|----------|
| ENSG00000178951 | AAGUGCA  |
| ENSG00000178951 | ACCCGUA  |
| ENSG00000178951 | AGAUAAA  |
| ENSG00000178951 | AGUGCCG  |
| ENSG00000178951 | AGUGCCU  |
| ENSG00000178951 | AUAAAAGU |
| ENSG00000178951 | CAAAGUG  |
| ENSG00000178951 | CAGUGCA  |
| ENSG00000178951 | CCAGGAG  |
| ENSG00000178951 | CCCUGAG  |
| ENSG00000178951 | CUCAGGG  |
| ENSG00000178951 | GCCUGU   |
| ENSG00000178951 | UACAAAAG |
| ENSG00000178951 | UGCAUUAU |
| ENSG00000178951 | UGCCUG   |
| ENSG00000178951 | UUGGUUC  |
| ENSG00000178965 | AAAGUGC  |
| ENSG00000178965 | AAGUGCU  |
| ENSG00000178965 | CACAGUG  |
| ENSG00000178966 | AAUACUG  |
| ENSG00000178966 | GAAAACA  |
| ENSG00000178971 | AGCACCA  |
| ENSG00000178971 | GAGCUAA  |
| ENSG00000178974 | AAGGCGC  |
| ENSG00000178974 | GGUUGUC  |
| ENSG00000178974 | GUAAACA  |
| ENSG00000178974 | GUCCAGA  |
| ENSG00000178974 | UCCAGUU  |
| ENSG00000178974 | UGCAUUG  |
| ENSG00000178996 | AAAGUAU  |
| ENSG00000178996 | AACAGUC  |
| ENSG00000178996 | ACAUAGA  |
| ENSG00000178996 | ACCAUUA  |
| ENSG00000178996 | AGCUGCC  |
| ENSG00000178996 | AUGCACC  |
| ENSG00000178996 | AUGGCUU  |
| ENSG00000178996 | CACAGUG  |
| ENSG00000178996 | CCCUGAG  |
| ENSG00000178996 | CUGGCUC  |
| ENSG00000178996 | GAGGCAG  |
| ENSG00000178996 | GGAGUCC  |
| ENSG00000178996 | GUAGUGU  |
| ENSG00000178996 | GUGCUUG  |
| ENSG00000178996 | UCACAGU  |
| ENSG00000178996 | UGUGCUU  |
| ENSG00000178996 | UUGAGGC  |
| ENSG00000179008 | UUCUUGU  |
| ENSG00000179010 | CUUUGGU  |
| ENSG00000179023 | AACAAAC  |
| ENSG00000179023 | GCAACUU  |
| ENSG00000179023 | GUAACAG  |
| ENSG00000179029 | AAUCACU  |
| ENSG00000179029 | GGGUGUU  |
| ENSG00000179041 | AAAAAUC  |
| ENSG00000179051 | AAAGGUA  |
| ENSG00000179051 | AAAGUUU  |
| ENSG00000179051 | AACGGAA  |
| ENSG00000179051 | AAGGCAC  |
| ENSG00000179051 | ACUCCAG  |
| ENSG00000179051 | AGCACCA  |
| ENSG00000179051 | AGCUGCC  |
| ENSG00000179051 | AUAUAAC  |
| ENSG00000179051 | AUGAGCU  |
| ENSG00000179051 | CAAAGUG  |

|                 |         |
|-----------------|---------|
| ENSG00000179051 | CAGUCCA |
| ENSG00000179051 | CAGUGCA |
| ENSG00000179051 | CCAGUGC |
| ENSG00000179051 | CUCAGGG |
| ENSG00000179051 | CUGGACU |
| ENSG00000179051 | GGAAGAC |
| ENSG00000179051 | GGCAUUG |
| ENSG00000179051 | GUCCAGA |
| ENSG00000179051 | UGCUCAC |
| ENSG00000179051 | UGGUACC |
| ENSG00000179051 | UUGGCAA |
| ENSG00000179051 | UUGGCAC |
| ENSG00000179057 | CUCAAAC |
| ENSG00000179057 | GUGGGGA |
| ENSG00000179057 | UCAUGAU |
| ENSG00000179057 | UCCUUGC |
| ENSG00000179059 | UUCCUAG |
| ENSG00000179071 | AAAGUAA |
| ENSG00000179071 | AAAGUAC |
| ENSG00000179071 | UAUAAUA |
| ENSG00000179083 | GGCAGUG |
| ENSG00000179087 | AAUCUCA |
| ENSG00000179088 | UGACAUC |
| ENSG00000179088 | UUGACAC |
| ENSG00000179094 | AGCACCA |
| ENSG00000179094 | AGCAGCU |
| ENSG00000179094 | CAGCAGA |
| ENSG00000179094 | CAGCAGG |
| ENSG00000179094 | CCCACCG |
| ENSG00000179094 | CCCACCU |
| ENSG00000179094 | GAGGGGC |
| ENSG00000179094 | GGCUCAG |
| ENSG00000179094 | UCCCACC |
| ENSG00000179097 | UGCAUUA |
| ENSG00000179104 | AAGUGCA |
| ENSG00000179104 | UCACAGU |
| ENSG00000179111 | AGGCAGG |
| ENSG00000179111 | GUCUGCC |
| ENSG00000179111 | UCCCACC |
| ENSG00000179119 | AAAAGUA |
| ENSG00000179119 | AAAGUGC |
| ENSG00000179119 | AACUACU |
| ENSG00000179119 | AAGGCAC |
| ENSG00000179119 | AAGUGCA |
| ENSG00000179119 | AAUGCCC |
| ENSG00000179119 | ACAUUCA |
| ENSG00000179119 | ACCCUGU |
| ENSG00000179119 | AGCACCA |
| ENSG00000179119 | AGCAGCA |
| ENSG00000179119 | AGCCUGC |
| ENSG00000179119 | AGCUGCC |
| ENSG00000179119 | AGUGCAA |
| ENSG00000179119 | CAGUGCA |
| ENSG00000179119 | CCUGCUG |
| ENSG00000179119 | CUCUAGC |
| ENSG00000179119 | CUCUUCC |
| ENSG00000179119 | CUUCACC |
| ENSG00000179119 | GAUUGUA |
| ENSG00000179119 | GGAAGAC |
| ENSG00000179119 | GUCAACA |
| ENSG00000179119 | GUGCAAA |
| ENSG00000179119 | UAAUGCU |
| ENSG00000179119 | UAUUGCU |
| ENSG00000179119 | UCAACAG |

|                 |         |
|-----------------|---------|
| ENSG00000179119 | UCACAGG |
| ENSG00000179119 | UCACAGU |
| ENSG00000179119 | UCCAGUU |
| ENSG00000179119 | UGGUACC |
| ENSG00000179119 | UUGGUCC |
| ENSG00000179119 | UUGGUUC |
| ENSG00000179134 | AAAAAUC |
| ENSG00000179134 | AACAAAC |
| ENSG00000179134 | AACCGUU |
| ENSG00000179134 | AAGAACC |
| ENSG00000179134 | AAGGCAC |
| ENSG00000179134 | ACCAGCA |
| ENSG00000179134 | AUAUAAC |
| ENSG00000179134 | CAGCAGA |
| ENSG00000179134 | CUCGCUG |
| ENSG00000179134 | GACCCUG |
| ENSG00000179134 | GGCUCUG |
| ENSG00000179134 | GUGAGGU |
| ENSG00000179134 | UGAGAAU |
| ENSG00000179151 | AAGGCGC |
| ENSG00000179151 | ACAGUAC |
| ENSG00000179151 | ACAGUAU |
| ENSG00000179151 | AGCACCA |
| ENSG00000179151 | AGCUGCC |
| ENSG00000179151 | AGUGCUG |
| ENSG00000179151 | CAGGCUC |
| ENSG00000179151 | CCCCCAG |
| ENSG00000179151 | CUCACAC |
| ENSG00000179151 | GCCUGGA |
| ENSG00000179151 | GCUGGUG |
| ENSG00000179152 | UGGCUGC |
| ENSG00000179163 | UCACAUU |
| ENSG00000179165 | GAGGUAU |
| ENSG00000179165 | GGUAGAC |
| ENSG00000179195 | AAAACUG |
| ENSG00000179195 | AACUCUA |
| ENSG00000179195 | AAUCACU |
| ENSG00000179195 | AUCACUA |
| ENSG00000179195 | CUGGAAA |
| ENSG00000179195 | GACUUCC |
| ENSG00000179195 | GCCUGGA |
| ENSG00000179195 | GUCAUUG |
| ENSG00000179195 | UAAUAGU |
| ENSG00000179195 | UCCUGAG |
| ENSG00000179195 | UUGGUCC |
| ENSG00000179218 | ACAUUCA |
| ENSG00000179218 | CAGUCCA |
| ENSG00000179218 | CUUACAG |
| ENSG00000179218 | GGAGGCA |
| ENSG00000179218 | UAAUAGU |
| ENSG00000179222 | CAAAACU |
| ENSG00000179222 | GUCAACA |
| ENSG00000179222 | UCAACAG |
| ENSG00000179241 | AAAGUGC |
| ENSG00000179241 | AACAAAC |
| ENSG00000179241 | AAGUGCA |
| ENSG00000179241 | ACACACU |
| ENSG00000179241 | AGGAGCU |
| ENSG00000179241 | AUGCAUU |
| ENSG00000179241 | CAGGCUC |
| ENSG00000179241 | CCUUCAU |
| ENSG00000179241 | CUAUACA |
| ENSG00000179241 | CUGCAGG |
| ENSG00000179241 | CUUUGGU |

|                 |          |
|-----------------|----------|
| ENSG00000179241 | UUCAAAU  |
| ENSG00000179242 | AAAAACC  |
| ENSG00000179242 | AGUGCCU  |
| ENSG00000179242 | AGUGCUU  |
| ENSG00000179242 | UCAAGUA  |
| ENSG00000179262 | CAAAACU  |
| ENSG00000179262 | GAGGGGC  |
| ENSG00000179262 | UGGGACA  |
| ENSG00000179270 | ACUGCAG  |
| ENSG00000179270 | ACUGCAU  |
| ENSG00000179270 | GCAGAAG  |
| ENSG00000179270 | GCAGCAU  |
| ENSG00000179270 | GUGGCC   |
| ENSG00000179270 | UCUGGAG  |
| ENSG00000179270 | UGCAGCU  |
| ENSG00000179270 | UGUCUUU  |
| ENSG00000179270 | UUCUUGU  |
| ENSG00000179284 | AGCAGCU  |
| ENSG00000179292 | GAGGCUG  |
| ENSG00000179292 | UCUGGAA  |
| ENSG00000179292 | UGUGCUU  |
| ENSG00000179295 | AAAGGUA  |
| ENSG00000179295 | AAGGCAC  |
| ENSG00000179295 | ACAAUUAU |
| ENSG00000179295 | ACACACU  |
| ENSG00000179295 | AUAUUAU  |
| ENSG00000179295 | AUCCUUU  |
| ENSG00000179295 | AUGAUGA  |
| ENSG00000179295 | CAAAGCA  |
| ENSG00000179295 | CACAAUG  |
| ENSG00000179295 | CUAGUCC  |
| ENSG00000179295 | CUUCACC  |
| ENSG00000179295 | CUUGUGU  |
| ENSG00000179295 | GAAACAU  |
| ENSG00000179295 | GAGCUGC  |
| ENSG00000179295 | GCAGGAC  |
| ENSG00000179295 | GCUGGUG  |
| ENSG00000179295 | GGCCUG   |
| ENSG00000179295 | GGUCUAG  |
| ENSG00000179295 | GUCUACU  |
| ENSG00000179295 | GUGCUUG  |
| ENSG00000179295 | GUGGGGA  |
| ENSG00000179295 | UACAAAG  |
| ENSG00000179295 | UACAGUU  |
| ENSG00000179295 | UCCCUUG  |
| ENSG00000179295 | UCCCUUU  |
| ENSG00000179295 | UCUUGAG  |
| ENSG00000179295 | UGACAUC  |
| ENSG00000179295 | UUAGGAU  |
| ENSG00000179295 | UUUUUGC  |
| ENSG00000179299 | CUUCUCU  |
| ENSG00000179300 | CUUCUCU  |
| ENSG00000179314 | AAGAACC  |
| ENSG00000179314 | AAUUUUA  |
| ENSG00000179314 | ACAUCAC  |
| ENSG00000179314 | AGCAGCU  |
| ENSG00000179314 | AGCUGCC  |
| ENSG00000179314 | CUUCUCU  |
| ENSG00000179314 | GAGAUGA  |
| ENSG00000179314 | GGCUCAG  |
| ENSG00000179314 | UUGGUUC  |
| ENSG00000179335 | GGCUCUG  |
| ENSG00000179335 | GUGCUUG  |
| ENSG00000179335 | UCACAUU  |



|                 |          |
|-----------------|----------|
| ENSG00000179335 | UGUGCUU  |
| ENSG00000179348 | AAAAACC  |
| ENSG00000179348 | AAAAGUA  |
| ENSG00000179348 | AAAGUAU  |
| ENSG00000179348 | AACAGUC  |
| ENSG00000179348 | AAUACUG  |
| ENSG00000179348 | AAUUAUU  |
| ENSG00000179348 | AGCAAAA  |
| ENSG00000179348 | AUAUAAC  |
| ENSG00000179348 | CACAGUG  |
| ENSG00000179348 | CAUAUUG  |
| ENSG00000179348 | GAGGAUA  |
| ENSG00000179348 | GAUUGUA  |
| ENSG00000179348 | GAUUGUC  |
| ENSG00000179348 | GCCUGGG  |
| ENSG00000179348 | GUCUCUG  |
| ENSG00000179348 | UCACAGG  |
| ENSG00000179361 | AACAUUC  |
| ENSG00000179361 | AGCAAAA  |
| ENSG00000179361 | AGCUGCC  |
| ENSG00000179361 | CAGCAGG  |
| ENSG00000179361 | CUAGGCU  |
| ENSG00000179361 | CUUUGGU  |
| ENSG00000179361 | GAUUGGU  |
| ENSG00000179361 | GAUUGUC  |
| ENSG00000179361 | GCCUGGG  |
| ENSG00000179361 | GGACCUG  |
| ENSG00000179361 | UACAAAG  |
| ENSG00000179361 | UCACAUU  |
| ENSG00000179361 | UCCCUUU  |
| ENSG00000179361 | UCCUGAG  |
| ENSG00000179361 | UCUCCAA  |
| ENSG00000179361 | UGAAAUG  |
| ENSG00000179361 | UGCAGCU  |
| ENSG00000179362 | AAAACUG  |
| ENSG00000179362 | AAACUGU  |
| ENSG00000179362 | AAAGUUU  |
| ENSG00000179362 | UAUAAAAG |
| ENSG00000179362 | UUCAAAU  |
| ENSG00000179364 | ACAUUCA  |
| ENSG00000179364 | ACUGUUU  |
| ENSG00000179364 | CCCUGAG  |
| ENSG00000179364 | GAGGUAG  |
| ENSG00000179364 | UAAGACG  |
| ENSG00000179387 | GAUUGUA  |
| ENSG00000179388 | AAAAGUA  |
| ENSG00000179388 | AAAGUAU  |
| ENSG00000179388 | AAAGUGC  |
| ENSG00000179388 | AAAUCCC  |
| ENSG00000179388 | AAGUCUU  |
| ENSG00000179388 | AAUACUG  |
| ENSG00000179388 | AAUGUUG  |
| ENSG00000179388 | ACAGUAC  |
| ENSG00000179388 | ACAUUAC  |
| ENSG00000179388 | ACAUUCA  |
| ENSG00000179388 | ACUCAAA  |
| ENSG00000179388 | ACUCCAG  |
| ENSG00000179388 | ACUGUAG  |
| ENSG00000179388 | AGCAAAA  |
| ENSG00000179388 | AGCAUUC  |
| ENSG00000179388 | AGCUUAU  |
| ENSG00000179388 | AGUGCAA  |
| ENSG00000179388 | AUAAAAGU |
| ENSG00000179388 | AUACAAG  |

|                 |          |
|-----------------|----------|
| ENSG00000179388 | AUGUCUG  |
| ENSG00000179388 | CACAAUG  |
| ENSG00000179388 | CACCACC  |
| ENSG00000179388 | CAGUGCA  |
| ENSG00000179388 | CUCUGGG  |
| ENSG00000179388 | CUGGGCA  |
| ENSG00000179388 | CUUUGGU  |
| ENSG00000179388 | GAGAAGA  |
| ENSG00000179388 | GAGGUAG  |
| ENSG00000179388 | GAUUGUA  |
| ENSG00000179388 | GGAAGAC  |
| ENSG00000179388 | GUGCAAA  |
| ENSG00000179388 | UAUAAAAG |
| ENSG00000179388 | UCACAAG  |
| ENSG00000179388 | UCACAGU  |
| ENSG00000179388 | UGAAAUG  |
| ENSG00000179388 | UGCAAAG  |
| ENSG00000179388 | UGCAUUA  |
| ENSG00000179388 | UUCAAAU  |
| ENSG00000179388 | UUCUAAU  |
| ENSG00000179388 | UUGGCAC  |
| ENSG00000179397 | AAGUAGC  |
| ENSG00000179431 | AAUUUUA  |
| ENSG00000179431 | AUGCACC  |
| ENSG00000179431 | CGUUGGC  |
| ENSG00000179431 | GGGCGUA  |
| ENSG00000179431 | GGGCGUG  |
| ENSG00000179431 | UCUCACC  |
| ENSG00000179431 | UGAAAUG  |
| ENSG00000179449 | AAAGUAU  |
| ENSG00000179449 | UUGGCAA  |
| ENSG00000179449 | UUGGCAC  |
| ENSG00000179454 | AAGUGCU  |
| ENSG00000179454 | ACUUGGA  |
| ENSG00000179454 | AUGGCUU  |
| ENSG00000179454 | GGAAGAC  |
| ENSG00000179454 | GUGCAAA  |
| ENSG00000179454 | UACAGUU  |
| ENSG00000179454 | UGCAGCU  |
| ENSG00000179455 | AAAAACC  |
| ENSG00000179455 | UCUUGAG  |
| ENSG00000179456 | AACAAAC  |
| ENSG00000179456 | AAGGCGC  |
| ENSG00000179456 | AAGUGCU  |
| ENSG00000179456 | AAUCACU  |
| ENSG00000179456 | AGAUGUG  |
| ENSG00000179456 | AGCAUUC  |
| ENSG00000179456 | AUACAAG  |
| ENSG00000179456 | AUGCAUU  |
| ENSG00000179456 | AUUGCAC  |
| ENSG00000179456 | CAAAGCA  |
| ENSG00000179456 | CAGUGCA  |
| ENSG00000179456 | CCAGUGU  |
| ENSG00000179456 | CCAUUAC  |
| ENSG00000179456 | CCCCCAG  |
| ENSG00000179456 | GAAAACA  |
| ENSG00000179456 | GCCUGGG  |
| ENSG00000179456 | UAAUGCU  |
| ENSG00000179456 | UACAGUU  |
| ENSG00000179456 | UAUUGCU  |
| ENSG00000179456 | UCACAGG  |
| ENSG00000179456 | UCACAGU  |
| ENSG00000179456 | UGAAGCU  |
| ENSG00000179456 | UGUCUUU  |

|                 |          |
|-----------------|----------|
| ENSG00000179456 | UUCAAGC  |
| ENSG00000179456 | UUGACAC  |
| ENSG00000179456 | UUUUUGC  |
| ENSG00000179476 | ACCCUGU  |
| ENSG00000179476 | ACCUGGA  |
| ENSG00000179476 | AGCCCUU  |
| ENSG00000179476 | UGGAUAA  |
| ENSG00000179476 | UUUGCAA  |
| ENSG00000179520 | AUGGAUU  |
| ENSG00000179520 | CAGCAGA  |
| ENSG00000179520 | GGCAAGA  |
| ENSG00000179528 | CUGGACU  |
| ENSG00000179542 | UAUAAAAG |
| ENSG00000179546 | GGUAGAC  |
| ENSG00000179562 | CACAGUG  |
| ENSG00000179562 | GAGAAGA  |
| ENSG00000179562 | UCACAUU  |
| ENSG00000179564 | GGAAUGU  |
| ENSG00000179583 | GCCUGGA  |
| ENSG00000179583 | GUAGUGU  |
| ENSG00000179588 | AAGUGCA  |
| ENSG00000179588 | AAGUGCU  |
| ENSG00000179593 | GGUUGUC  |
| ENSG00000179600 | CUCACAC  |
| ENSG00000179603 | AACAUUC  |
| ENSG00000179603 | CCAUUAC  |
| ENSG00000179603 | UGCAAAG  |
| ENSG00000179603 | UGCAUUG  |
| ENSG00000179603 | UUUCAAC  |
| ENSG00000179604 | AAUGUUG  |
| ENSG00000179604 | UCUGGAA  |
| ENSG00000179604 | UUCCUAG  |
| ENSG00000179632 | CAAAGUG  |
| ENSG00000179632 | CAGCAA   |
| ENSG00000179632 | CAGUGCA  |
| ENSG00000179632 | CUGCAGC  |
| ENSG00000179632 | GAGCUGC  |
| ENSG00000179632 | GCAGCAU  |
| ENSG00000179632 | GGAGUGU  |
| ENSG00000179639 | UCUUGAG  |
| ENSG00000179674 | AAAGUUU  |
| ENSG00000179761 | UCCUUGC  |
| ENSG00000179774 | AAAGUUU  |
| ENSG00000179774 | UGAGGAC  |
| ENSG00000179776 | ACAGUAU  |
| ENSG00000179776 | AUGCACC  |
| ENSG00000179776 | CACAGUG  |
| ENSG00000179776 | GAGCUGC  |
| ENSG00000179776 | GCACCAU  |
| ENSG00000179776 | UCACAGG  |
| ENSG00000179776 | UCCUGU   |
| ENSG00000179813 | AAGGUGC  |
| ENSG00000179813 | ACAUUCA  |
| ENSG00000179813 | AGAUAAA  |
| ENSG00000179813 | AUCACUA  |
| ENSG00000179813 | CAAAGUG  |
| ENSG00000179813 | CAGCAA   |
| ENSG00000179813 | CCUUCUU  |
| ENSG00000179813 | GCACCAU  |
| ENSG00000179813 | UUCUGCA  |
| ENSG00000179820 | AAGGCAC  |
| ENSG00000179820 | AGCAGCA  |
| ENSG00000179820 | CUCCAA   |
| ENSG00000179820 | GGCAGUG  |

|                 |          |
|-----------------|----------|
| ENSG00000179820 | UCUGGAG  |
| ENSG00000179820 | UUGGAGG  |
| ENSG00000179820 | UUGGCAA  |
| ENSG00000179820 | UUGGCAC  |
| ENSG00000179833 | AAAGAAU  |
| ENSG00000179833 | AAUGCCC  |
| ENSG00000179833 | AUAAUAC  |
| ENSG00000179833 | AUGGCUU  |
| ENSG00000179833 | AUUGCAC  |
| ENSG00000179833 | CACAGUG  |
| ENSG00000179833 | CAGGAAC  |
| ENSG00000179833 | CCUUCAU  |
| ENSG00000179833 | GGCAAGA  |
| ENSG00000179833 | GUGCUUG  |
| ENSG00000179833 | UAAUACA  |
| ENSG00000179833 | UCACAGU  |
| ENSG00000179833 | UCCAUA   |
| ENSG00000179837 | AAAGUGC  |
| ENSG00000179837 | CAGACAG  |
| ENSG00000179837 | CAGCAGA  |
| ENSG00000179837 | UACAGUU  |
| ENSG00000179837 | UUGGCAA  |
| ENSG00000179841 | AGCACCA  |
| ENSG00000179841 | AGCCCUU  |
| ENSG00000179841 | AUGUAAU  |
| ENSG00000179841 | CAGACAG  |
| ENSG00000179841 | CUGGGGG  |
| ENSG00000179841 | GAGGUAG  |
| ENSG00000179841 | GGAGGAG  |
| ENSG00000179841 | UUAUGCA  |
| ENSG00000179862 | UUGGAGG  |
| ENSG00000179862 | UUGGUUC  |
| ENSG00000179869 | UCAACAG  |
| ENSG00000179886 | AGCACCA  |
| ENSG00000179886 | CAGUGCA  |
| ENSG00000179886 | GUGACUG  |
| ENSG00000179889 | AACAUUC  |
| ENSG00000179889 | ACAUUCA  |
| ENSG00000179889 | AGCAAAA  |
| ENSG00000179889 | AUUGCAC  |
| ENSG00000179889 | GAGUUGG  |
| ENSG00000179889 | GCACCAU  |
| ENSG00000179889 | GGAAGAC  |
| ENSG00000179889 | UCUCAAG  |
| ENSG00000179889 | UUCAAGC  |
| ENSG00000179889 | UUGGCAC  |
| ENSG00000179912 | AAAAACC  |
| ENSG00000179912 | AACUCUA  |
| ENSG00000179912 | AAUACUG  |
| ENSG00000179912 | ACAAUUAU |
| ENSG00000179912 | AUGUGCC  |
| ENSG00000179912 | AUUCAUU  |
| ENSG00000179912 | CAGCAAA  |
| ENSG00000179912 | CCAGUGU  |
| ENSG00000179912 | CUCAAAC  |
| ENSG00000179912 | GAGAAGA  |
| ENSG00000179912 | GGAGUCC  |
| ENSG00000179912 | GUAUGUU  |
| ENSG00000179912 | GUGCAAA  |
| ENSG00000179912 | UACAGUU  |
| ENSG00000179912 | UGUAUGU  |
| ENSG00000179915 | AACACUG  |
| ENSG00000179915 | AGAUAAA  |
| ENSG00000179915 | CGUGCAU  |

|                 |         |
|-----------------|---------|
| ENSG00000179915 | GUGCUUG |
| ENSG00000179915 | UGUGCUU |
| ENSG00000179918 | GGCUCUG |
| ENSG00000179918 | GUCCAGA |
| ENSG00000179918 | UUCUUGU |
| ENSG00000179922 | AGUGCAA |
| ENSG00000179922 | CAGUGCA |
| ENSG00000179922 | GAGGUAG |
| ENSG00000179922 | GAGGUAU |
| ENSG00000179922 | GGCUCUG |
| ENSG00000179922 | GUGAGGU |
| ENSG00000179922 | UAAUAGU |
| ENSG00000179933 | CUUACAG |
| ENSG00000179933 | GACAACU |
| ENSG00000179933 | GGGAACG |
| ENSG00000179933 | UCCAGUU |
| ENSG00000179933 | UUCCUAG |
| ENSG00000179965 | CCCACCU |
| ENSG00000179965 | UCACAGG |
| ENSG00000179981 | AAGGCAC |
| ENSG00000179981 | AAUUUUA |
| ENSG00000179981 | AUGCCUU |
| ENSG00000179981 | CAGGAAC |
| ENSG00000179981 | GAAAACA |
| ENSG00000179981 | GCAACUU |
| ENSG00000179981 | GGCUCAG |
| ENSG00000179981 | GUCCAGA |
| ENSG00000179981 | UGCAUAG |
| ENSG00000180008 | ACCACAG |
| ENSG00000180008 | AGGUAGU |
| ENSG00000180008 | AGUGAUC |
| ENSG00000180008 | AUGGCUU |
| ENSG00000180008 | CAGGAAC |
| ENSG00000180008 | CCCUGAG |
| ENSG00000180008 | CUACAAA |
| ENSG00000180008 | GAAGGAA |
| ENSG00000180008 | GGCAGUG |
| ENSG00000180008 | GUCCAGA |
| ENSG00000180008 | UAUAUGA |
| ENSG00000180008 | UCACAGG |
| ENSG00000180008 | UCACAGU |
| ENSG00000180008 | UCAUAGA |
| ENSG00000180008 | UCCUAUA |
| ENSG00000180008 | UUCUAAU |
| ENSG00000180008 | UUGAUCA |
| ENSG00000180011 | AACAUUC |
| ENSG00000180011 | AAGUCUU |
| ENSG00000180011 | ACAUUAC |
| ENSG00000180011 | ACUCAA  |
| ENSG00000180011 | AGCAGCA |
| ENSG00000180011 | AGCAGCG |
| ENSG00000180011 | AGCAGCU |
| ENSG00000180011 | AGCUUAU |
| ENSG00000180011 | AGGACAC |
| ENSG00000180011 | AGUGCAA |
| ENSG00000180011 | AGUGCUG |
| ENSG00000180011 | AGUGCUU |
| ENSG00000180011 | CACAGUG |
| ENSG00000180011 | CAGUGCA |
| ENSG00000180011 | CUUGUAU |
| ENSG00000180011 | GAAAACA |
| ENSG00000180011 | GCUACAU |
| ENSG00000180011 | GCUAGCA |
| ENSG00000180011 | GGCAGCG |

|                 |         |
|-----------------|---------|
| ENSG00000180011 | GUCAUUG |
| ENSG00000180011 | GUGACAG |
| ENSG00000180011 | UAGGUAU |
| ENSG00000180011 | UCACAGU |
| ENSG00000180011 | UCCUUU  |
| ENSG00000180011 | UGAGGAC |
| ENSG00000180011 | UGAUCCA |
| ENSG00000180011 | UGUCUUU |
| ENSG00000180011 | UCCAUA  |
| ENSG00000180011 | UUGGCAA |
| ENSG00000180011 | UUGGCAC |
| ENSG00000180011 | UUGGUUC |
| ENSG00000180138 | AAAACUG |
| ENSG00000180138 | AAAUCCC |
| ENSG00000180138 | CACAAUG |
| ENSG00000180138 | GUUAAUG |
| ENSG00000180138 | UCACAAG |
| ENSG00000180138 | UGUGUCA |
| ENSG00000180155 | AGGGAGG |
| ENSG00000180155 | UGGGGGA |
| ENSG00000180182 | AAGUGCA |
| ENSG00000180182 | ACACACC |
| ENSG00000180182 | ACAGUAC |
| ENSG00000180182 | ACUGGCC |
| ENSG00000180182 | CAAAGCA |
| ENSG00000180182 | CACAGUG |
| ENSG00000180182 | CAUAUUG |
| ENSG00000180182 | CUAUACA |
| ENSG00000180182 | GGCAUUG |
| ENSG00000180182 | UACAGUU |
| ENSG00000180182 | UAUUGCU |
| ENSG00000180182 | UGCCAGC |
| ENSG00000180182 | UGGGUGA |
| ENSG00000180182 | UUGGCAA |
| ENSG00000180190 | AAGGCAC |
| ENSG00000180190 | GGAAGAC |
| ENSG00000180198 | CCUGUU  |
| ENSG00000180198 | GGCUGCG |
| ENSG00000180198 | GUGCUUG |
| ENSG00000180198 | UGGCUGC |
| ENSG00000180198 | UGUGCUU |
| ENSG00000180219 | AUGUGGG |
| ENSG00000180228 | AAAGAGC |
| ENSG00000180228 | AGCACCA |
| ENSG00000180228 | GCUACAU |
| ENSG00000180228 | UGAAGCU |
| ENSG00000180233 | UCCUGU  |
| ENSG00000180233 | UGCAUAG |
| ENSG00000180251 | GUAAACA |
| ENSG00000180259 | UCCAGAG |
| ENSG00000180259 | UCCUCG  |
| ENSG00000180263 | AAGACAU |
| ENSG00000180263 | AAGUGCA |
| ENSG00000180263 | AUACCUC |
| ENSG00000180263 | CAGCAGA |
| ENSG00000180263 | CUGGAAA |
| ENSG00000180263 | GACCAUG |
| ENSG00000180263 | GAGAUGA |
| ENSG00000180263 | GAGGUAU |
| ENSG00000180263 | GCACCAU |
| ENSG00000180263 | GUAAACA |
| ENSG00000180263 | UCACAGU |
| ENSG00000180263 | UCCAGUU |
| ENSG00000180263 | UCUGGAA |

|                 |          |
|-----------------|----------|
| ENSG00000180287 | GUGCUUG  |
| ENSG00000180304 | ACACACU  |
| ENSG00000180304 | ACUGUUU  |
| ENSG00000180304 | AGUAACA  |
| ENSG00000180304 | CUAGGCU  |
| ENSG00000180304 | UUCUAAU  |
| ENSG00000180304 | UUGACAC  |
| ENSG00000180304 | UUUCAAC  |
| ENSG00000180305 | CUCCCAC  |
| ENSG00000180318 | AGCAGCU  |
| ENSG00000180318 | AGCUUUAU |
| ENSG00000180329 | GGAAGAC  |
| ENSG00000180329 | GGAGAGA  |
| ENSG00000180332 | CACAGUG  |
| ENSG00000180332 | GGCUGCG  |
| ENSG00000180332 | UACAGUU  |
| ENSG00000180332 | UCACAGU  |
| ENSG00000180332 | UGGCUGC  |
| ENSG00000180353 | GGAGGCA  |
| ENSG00000180354 | AAGUGCA  |
| ENSG00000180354 | AAGUGCU  |
| ENSG00000180354 | ACUAGAU  |
| ENSG00000180354 | AUGGCUU  |
| ENSG00000180354 | CACAGUG  |
| ENSG00000180354 | CCAGGAG  |
| ENSG00000180354 | CCCACCU  |
| ENSG00000180354 | GACAACU  |
| ENSG00000180354 | GCCUGGA  |
| ENSG00000180354 | GGAUGAG  |
| ENSG00000180354 | UAAUAGU  |
| ENSG00000180354 | UCACAGG  |
| ENSG00000180354 | UGUGCUU  |
| ENSG00000180354 | UUGGCAC  |
| ENSG00000180354 | UUUGCAC  |
| ENSG00000180357 | AAAAAUC  |
| ENSG00000180357 | AAAGAGC  |
| ENSG00000180357 | AACACUG  |
| ENSG00000180357 | ACCAGCA  |
| ENSG00000180357 | AGCACCA  |
| ENSG00000180357 | AGCAGCA  |
| ENSG00000180357 | AGCCAGU  |
| ENSG00000180357 | AGCUGCC  |
| ENSG00000180357 | AGGGUCU  |
| ENSG00000180357 | AUAUAAC  |
| ENSG00000180357 | CAGCAAA  |
| ENSG00000180357 | CAGCAGA  |
| ENSG00000180357 | CAGCAGG  |
| ENSG00000180357 | CAGGAAC  |
| ENSG00000180357 | CCUUCAU  |
| ENSG00000180357 | CUCUAGC  |
| ENSG00000180357 | CUCUGGG  |
| ENSG00000180357 | CUCUUCC  |
| ENSG00000180357 | GAGAAAU  |
| ENSG00000180357 | GAGGGGC  |
| ENSG00000180357 | GAUUGUA  |
| ENSG00000180357 | GCAGGAC  |
| ENSG00000180357 | GCCUGAU  |
| ENSG00000180357 | GCGGGUG  |
| ENSG00000180357 | GCUGGUG  |
| ENSG00000180357 | GCUGUCU  |
| ENSG00000180357 | GGCUGCG  |
| ENSG00000180357 | GGGGCAG  |
| ENSG00000180357 | GGUGGGC  |
| ENSG00000180357 | GGUGGUC  |

|                 |         |
|-----------------|---------|
| ENSG00000180357 | GUCUCUG |
| ENSG00000180357 | GUCUGCC |
| ENSG00000180357 | GUGCAA  |
| ENSG00000180357 | GUGCUUG |
| ENSG00000180357 | UACAAAG |
| ENSG00000180357 | UACAGUU |
| ENSG00000180357 | UCACAAG |
| ENSG00000180357 | UCACAGU |
| ENSG00000180357 | UGCAUAG |
| ENSG00000180357 | UGUAUAA |
| ENSG00000180357 | UGUGCUU |
| ENSG00000180357 | UUGGCAC |
| ENSG00000180357 | UUGUGAC |
| ENSG00000180370 | AAAGGUA |
| ENSG00000180370 | AAAGUAA |
| ENSG00000180370 | AAAGUUU |
| ENSG00000180370 | AAGUGCA |
| ENSG00000180370 | AAGUGCU |
| ENSG00000180370 | CACAAUG |
| ENSG00000180370 | CUUUGGU |
| ENSG00000180370 | GGGAUCG |
| ENSG00000180370 | GUUAAUG |
| ENSG00000180370 | UAUAAAG |
| ENSG00000180370 | UGCCAGC |
| ENSG00000180370 | UGGGAUC |
| ENSG00000180370 | UUGGUUC |
| ENSG00000180370 | UUUCAAC |
| ENSG00000180398 | ACUCAGC |
| ENSG00000180398 | AGGAUGU |
| ENSG00000180398 | AGUAGUU |
| ENSG00000180398 | CCAGUGU |
| ENSG00000180398 | GGCAGUG |
| ENSG00000180398 | UACAAAG |
| ENSG00000180398 | UUGACAC |
| ENSG00000180398 | UUGGCAA |
| ENSG00000180432 | AAAGAGG |
| ENSG00000180440 | AAGUUGU |
| ENSG00000180447 | AAAGUAC |
| ENSG00000180447 | AACUGGU |
| ENSG00000180447 | AAGGCAC |
| ENSG00000180447 | AAUUAUU |
| ENSG00000180447 | AUACAAG |
| ENSG00000180447 | AUGCAUU |
| ENSG00000180447 | CAGUGCA |
| ENSG00000180447 | CUACAAA |
| ENSG00000180447 | UAUAAAG |
| ENSG00000180483 | AAUUUUA |
| ENSG00000180488 | AAGGUGC |
| ENSG00000180488 | ACAGUAU |
| ENSG00000180488 | AGCAGCG |
| ENSG00000180488 | CAAAGCA |
| ENSG00000180488 | CCCUGAG |
| ENSG00000180488 | GCAGCAU |
| ENSG00000180488 | UUGGUCC |
| ENSG00000180509 | ACUGGCC |
| ENSG00000180530 | AACCGG  |
| ENSG00000180530 | ACAAGGU |
| ENSG00000180530 | AUAUAA  |
| ENSG00000180530 | CAAAGC  |
| ENSG00000180530 | CACAGGG |
| ENSG00000180530 | CAGCAGG |
| ENSG00000180530 | CCCCAG  |
| ENSG00000180530 | CUGCAGG |
| ENSG00000180530 | GCAACUU |



|                 |         |
|-----------------|---------|
| ENSG00000180530 | GCAGCAU |
| ENSG00000180530 | GCAGGAC |
| ENSG00000180530 | GGCCUG  |
| ENSG00000180530 | GGUUGUC |
| ENSG00000180530 | GUAACAG |
| ENSG00000180530 | GUGGCC  |
| ENSG00000180530 | UAAGACU |
| ENSG00000180530 | UCAAGUA |
| ENSG00000180530 | UCACACA |
| ENSG00000180530 | UCCUGAG |
| ENSG00000180530 | UGCAUUG |
| ENSG00000180530 | UGGCCCU |
| ENSG00000180543 | AAAGCUG |
| ENSG00000180543 | AAGUCAC |
| ENSG00000180543 | ACUGGCC |
| ENSG00000180543 | ACUGGCU |
| ENSG00000180543 | CAGCAGG |
| ENSG00000180543 | CCAGCAU |
| ENSG00000180543 | CUGGCUC |
| ENSG00000180543 | UCACAGG |
| ENSG00000180543 | UCACAGU |
| ENSG00000180543 | UCUUGAG |
| ENSG00000180573 | AAAGAGC |
| ENSG00000180573 | GGCUCUG |
| ENSG00000180592 | AAAUUUC |
| ENSG00000180592 | CAGUAGA |
| ENSG00000180592 | GAGGUAG |
| ENSG00000180592 | GAGGUAU |
| ENSG00000180592 | GAUUGUA |
| ENSG00000180592 | GGCUCAG |
| ENSG00000180592 | UGGGUGA |
| ENSG00000180596 | AAAGAGC |
| ENSG00000180596 | GGCUCUG |
| ENSG00000180611 | AUGUAAU |
| ENSG00000180611 | GAUAUGU |
| ENSG00000180611 | GCAGAAG |
| ENSG00000180611 | GCUGGAU |
| ENSG00000180611 | GUGCAA  |
| ENSG00000180616 | CAGACAG |
| ENSG00000180616 | UCUAGAG |
| ENSG00000180626 | CCAGUGC |
| ENSG00000180626 | CCAGUGU |
| ENSG00000180628 | AACAUUC |
| ENSG00000180628 | AAGGCAC |
| ENSG00000180628 | AAGUCAC |
| ENSG00000180628 | AGCAAAA |
| ENSG00000180628 | AGCUGCC |
| ENSG00000180628 | AGGACAC |
| ENSG00000180628 | AGUGCAA |
| ENSG00000180628 | CAGCUGG |
| ENSG00000180628 | CAGUAGA |
| ENSG00000180628 | CAGUAGU |
| ENSG00000180628 | GAGGCAG |
| ENSG00000180628 | GCAGCAU |
| ENSG00000180628 | GCAGGAC |
| ENSG00000180628 | GUGCAA  |
| ENSG00000180628 | UAAUAGU |
| ENSG00000180628 | UAGGCCG |
| ENSG00000180628 | UGUCUUU |
| ENSG00000180628 | UUGACAC |
| ENSG00000180660 | AAAGUAC |
| ENSG00000180660 | AACAUUC |
| ENSG00000180660 | CCAGUGC |
| ENSG00000180660 | GUAAACA |

|                 |          |
|-----------------|----------|
| ENSG00000180667 | AAGGCAC  |
| ENSG00000180667 | AGCAGCG  |
| ENSG00000180667 | AGCAGCU  |
| ENSG00000180667 | AGGUAGU  |
| ENSG00000180667 | AGUGCUG  |
| ENSG00000180667 | AGUGC UU |
| ENSG00000180667 | AUGGCAC  |
| ENSG00000180667 | CCCUGAG  |
| ENSG00000180667 | CCUUCUG  |
| ENSG00000180667 | GAGGU AU |
| ENSG00000180667 | GCAUCCC  |
| ENSG00000180667 | GGCUCAG  |
| ENSG00000180667 | UCCUGU   |
| ENSG00000180667 | UCUCAAG  |
| ENSG00000180667 | UCUGGAG  |
| ENSG00000180667 | UGCAUAG  |
| ENSG00000180694 | AGCCCUU  |
| ENSG00000180694 | CACAGUG  |
| ENSG00000180694 | GAGUCUU  |
| ENSG00000180694 | UCACAUU  |
| ENSG00000180694 | UCCACA   |
| ENSG00000180772 | GAGAAAU  |
| ENSG00000180776 | AAGGCAC  |
| ENSG00000180787 | UUGGCAA  |
| ENSG00000180801 | AAAGUGC  |
| ENSG00000180801 | AGUGC UU |
| ENSG00000180801 | GGCAGUG  |
| ENSG00000180801 | UACAGUU  |
| ENSG00000180801 | UUGGCAC  |
| ENSG00000180801 | UUGGUCC  |
| ENSG00000180818 | UCUCAA   |
| ENSG00000180818 | UGCAUUG  |
| ENSG00000180834 | AGCACCA  |
| ENSG00000180834 | GAUUGUA  |
| ENSG00000180834 | GCUAGCA  |
| ENSG00000180834 | GUGCCUG  |
| ENSG00000180861 | AGCAAAA  |
| ENSG00000180861 | AUGGCUU  |
| ENSG00000180861 | CAGCAA   |
| ENSG00000180861 | CUCCAA   |
| ENSG00000180861 | UCUUGAG  |
| ENSG00000180861 | UGAGAAU  |
| ENSG00000180861 | UGAUCCA  |
| ENSG00000180875 | AAUACUG  |
| ENSG00000180875 | AAUCCUU  |
| ENSG00000180875 | ACAUUAC  |
| ENSG00000180875 | ACUGCAG  |
| ENSG00000180875 | AUGGCAC  |
| ENSG00000180875 | CACAGGG  |
| ENSG00000180875 | CAUAUUG  |
| ENSG00000180875 | GAAACAU  |
| ENSG00000180875 | GAGACCU  |
| ENSG00000180875 | GGAGUGU  |
| ENSG00000180875 | GGCAGUG  |
| ENSG00000180875 | UAUAAAG  |
| ENSG00000180875 | UAUUGCU  |
| ENSG00000180875 | UCACAUU  |
| ENSG00000180875 | UCAUUUG  |
| ENSG00000180875 | UCCACC   |
| ENSG00000180875 | UGUGUGG  |
| ENSG00000180875 | UUCUGCA  |
| ENSG00000180878 | AGCAGCU  |
| ENSG00000180891 | AGCACCA  |
| ENSG00000180891 | CAGCUGG  |

|                 |         |
|-----------------|---------|
| ENSG00000180891 | CUGCAGC |
| ENSG00000180891 | GCACCAU |
| ENSG00000180891 | GGCAGUG |
| ENSG00000180891 | UGCAGCU |
| ENSG00000180900 | GGUUGUC |
| ENSG00000180900 | UACAGUU |
| ENSG00000180900 | UUGGUUC |
| ENSG00000180901 | AAAGCUG |
| ENSG00000180901 | CUUUGGU |
| ENSG00000180901 | GCAACUU |
| ENSG00000180901 | GCAGGUU |
| ENSG00000180901 | UUGGCAA |
| ENSG00000180901 | UUGGCAC |
| ENSG00000180914 | AGCACCA |
| ENSG00000180929 | UACAGUU |
| ENSG00000180929 | UCCCUGU |
| ENSG00000180929 | UGCCUG  |
| ENSG00000180929 | UUUCAAC |
| ENSG00000180957 | AACACUG |
| ENSG00000180957 | ACAGUAU |
| ENSG00000180957 | GAGAAAU |
| ENSG00000180957 | GUAUGUU |
| ENSG00000180957 | UAUAAAG |
| ENSG00000180957 | UGACCUA |
| ENSG00000180957 | UGCAUAG |
| ENSG00000180957 | UGCAUAU |
| ENSG00000180957 | UGUAUGU |
| ENSG00000180957 | UUGGUCC |
| ENSG00000180964 | ACACACC |
| ENSG00000180964 | ACACACU |
| ENSG00000180964 | UCCAGAG |
| ENSG00000180979 | AACAAAC |
| ENSG00000180979 | CUUCUCU |
| ENSG00000180979 | UAUAAAG |
| ENSG00000180979 | UGCAUAG |
| ENSG00000180998 | AAGUGCU |
| ENSG00000180998 | AGAUAAA |
| ENSG00000180998 | AGUGCUG |
| ENSG00000180998 | AUUCAUU |
| ENSG00000180998 | CAGUGCA |
| ENSG00000180998 | GAGGUAU |
| ENSG00000180998 | GUGCUUG |
| ENSG00000180998 | UAGUGAG |
| ENSG00000180998 | UCCCUUG |
| ENSG00000180998 | UGUGCUU |
| ENSG00000181026 | GAGGUAG |
| ENSG00000181031 | AACACUG |
| ENSG00000181031 | AAGGCAC |
| ENSG00000181031 | UCCAGAG |
| ENSG00000181035 | ACUCCAG |
| ENSG00000181039 | AGCAGCA |
| ENSG00000181039 | CAGCAGA |
| ENSG00000181039 | GAGGCUG |
| ENSG00000181039 | UGUGCUU |
| ENSG00000181045 | UACAAAG |
| ENSG00000181061 | AGCAAAA |
| ENSG00000181061 | AGCCUGC |
| ENSG00000181061 | GCAGCAU |
| ENSG00000181061 | UGACCUA |
| ENSG00000181072 | AAGUGCA |
| ENSG00000181072 | AGCCCUU |
| ENSG00000181072 | AGUGCAA |
| ENSG00000181072 | AUUGCAC |
| ENSG00000181090 | AAACUGU |

|                 |         |
|-----------------|---------|
| ENSG00000181090 | AAAUGGU |
| ENSG00000181090 | AAGGUGC |
| ENSG00000181090 | AAUCACU |
| ENSG00000181090 | ACUGCAG |
| ENSG00000181090 | GACCUGG |
| ENSG00000181090 | UUGUUCG |
| ENSG00000181104 | GGCCUG  |
| ENSG00000181104 | UGCAAAG |
| ENSG00000181143 | GGUUUAC |
| ENSG00000181163 | AAGUGCU |
| ENSG00000181163 | AGUGCCG |
| ENSG00000181163 | AGUGCCU |
| ENSG00000181163 | UUCAAAU |
| ENSG00000181192 | AAAAAUC |
| ENSG00000181192 | AAAACUG |
| ENSG00000181192 | AAAUCCC |
| ENSG00000181192 | AGCACCA |
| ENSG00000181192 | AGCAGCA |
| ENSG00000181192 | CUGGAAA |
| ENSG00000181218 | AAAGAGC |
| ENSG00000181220 | ACAGUAU |
| ENSG00000181220 | AGUGAUC |
| ENSG00000181220 | CAGUUAC |
| ENSG00000181220 | GCUGGUG |
| ENSG00000181222 | CAGGAAC |
| ENSG00000181274 | AAAGUUU |
| ENSG00000181274 | GAGAAAU |
| ENSG00000181274 | UCACAUU |
| ENSG00000181274 | UUCAAGC |
| ENSG00000181274 | UUUCAAC |
| ENSG00000181291 | AAAAAUC |
| ENSG00000181291 | AAAUCCC |
| ENSG00000181291 | AAGGCCG |
| ENSG00000181291 | AAGUCUU |
| ENSG00000181291 | AUCCUUG |
| ENSG00000181291 | CACAGUG |
| ENSG00000181291 | CCUGAG  |
| ENSG00000181291 | GAGCUGC |
| ENSG00000181291 | GCAGGAC |
| ENSG00000181291 | GGGAGCU |
| ENSG00000181291 | GGUGGGC |
| ENSG00000181315 | AGUAACA |
| ENSG00000181315 | AUGGCUU |
| ENSG00000181315 | GAGGUAU |
| ENSG00000181315 | UCUCAA  |
| ENSG00000181322 | UCCUGAG |
| ENSG00000181333 | AACAUUC |
| ENSG00000181333 | AACUACU |
| ENSG00000181333 | AGCAGCA |
| ENSG00000181333 | GAAACAU |
| ENSG00000181392 | UAUUACC |
| ENSG00000181392 | UGUGUCA |
| ENSG00000181409 | AGCAGCA |
| ENSG00000181409 | AGCAGCG |
| ENSG00000181409 | AGCAGCU |
| ENSG00000181409 | AUUGCAC |
| ENSG00000181409 | CACCAGC |
| ENSG00000181409 | CUUUGGU |
| ENSG00000181409 | GCACCAU |
| ENSG00000181409 | GCUAGCA |
| ENSG00000181409 | UUGGCAC |
| ENSG00000181418 | ACUGUGU |
| ENSG00000181418 | GAGGUAG |
| ENSG00000181418 | UCUGGAA |

|                 |          |
|-----------------|----------|
| ENSG00000181418 | UGAAGUG  |
| ENSG00000181449 | AAACUGU  |
| ENSG00000181449 | AAUACUG  |
| ENSG00000181449 | ACUGUAG  |
| ENSG00000181449 | AGCUUUAU |
| ENSG00000181449 | AUACAAG  |
| ENSG00000181449 | CUAUACA  |
| ENSG00000181449 | UACAAAG  |
| ENSG00000181449 | UUGGCAA  |
| ENSG00000181467 | AAAAGUA  |
| ENSG00000181467 | AAAGCUG  |
| ENSG00000181467 | AACAUUC  |
| ENSG00000181467 | AAGGCAC  |
| ENSG00000181467 | ACAGGUG  |
| ENSG00000181467 | AGAUGUG  |
| ENSG00000181467 | CAA AUGC |
| ENSG00000181467 | CACAGGG  |
| ENSG00000181467 | CAGCAGA  |
| ENSG00000181467 | CAGCAGG  |
| ENSG00000181467 | CCCCAG   |
| ENSG00000181467 | CUGGAAA  |
| ENSG00000181467 | GGAGGAG  |
| ENSG00000181467 | GGCCUG   |
| ENSG00000181467 | GGGGUGC  |
| ENSG00000181467 | GUAAACA  |
| ENSG00000181467 | GUAACAG  |
| ENSG00000181467 | GUGCAA   |
| ENSG00000181467 | GUGCGCA  |
| ENSG00000181467 | UCUGGAG  |
| ENSG00000181467 | UGCAUUAU |
| ENSG00000181467 | UGGAUAA  |
| ENSG00000181467 | UGGUACC  |
| ENSG00000181467 | UUGACAC  |
| ENSG00000181467 | UUGGCAC  |
| ENSG00000181472 | AAUCUCU  |
| ENSG00000181472 | CUAUACA  |
| ENSG00000181472 | GAGAACC  |
| ENSG00000181472 | UAUUACC  |
| ENSG00000181472 | UCACAUU  |
| ENSG00000181481 | AAGGCAC  |
| ENSG00000181495 | ACAUUAC  |
| ENSG00000181495 | GUUAAUG  |
| ENSG00000181495 | UAUAUGA  |
| ENSG00000181495 | UGCAGCU  |
| ENSG00000181513 | CAAGAGC  |
| ENSG00000181513 | GGCUCAG  |
| ENSG00000181541 | AACAUUC  |
| ENSG00000181541 | ACAUUCA  |
| ENSG00000181541 | UUGGCAC  |
| ENSG00000181555 | AAAAAUC  |
| ENSG00000181555 | UAAUACA  |
| ENSG00000181555 | UAUAAUA  |
| ENSG00000181555 | UCACAUU  |
| ENSG00000181577 | GCCUGGG  |
| ENSG00000181585 | GCCUGGA  |
| ENSG00000181585 | UGAGAAG  |
| ENSG00000181588 | AAAACUG  |
| ENSG00000181588 | AAAGCUG  |
| ENSG00000181588 | AAAGGUA  |
| ENSG00000181588 | AAAGUAU  |
| ENSG00000181588 | AAGUGCA  |
| ENSG00000181588 | AAUACUG  |
| ENSG00000181588 | AGUGCAA  |
| ENSG00000181588 | AUAAAGU  |

|                 |          |
|-----------------|----------|
| ENSG00000181588 | AUAU AAC |
| ENSG00000181588 | GUAACA   |
| ENSG00000181588 | UGAAGUG  |
| ENSG00000181619 | UGCAUUG  |
| ENSG00000181619 | UUUUUGC  |
| ENSG00000181649 | UAAGACG  |
| ENSG00000181652 | CCUGCUG  |
| ENSG00000181652 | GAGGCUG  |
| ENSG00000181652 | GGGAGCU  |
| ENSG00000181656 | AAAGCUG  |
| ENSG00000181656 | AGGAGCU  |
| ENSG00000181656 | CAAAGCA  |
| ENSG00000181656 | UACAAAG  |
| ENSG00000181656 | UAUUGC U |
| ENSG00000181666 | AAAGUUU  |
| ENSG00000181690 | AAAGCUG  |
| ENSG00000181690 | AAAGUGC  |
| ENSG00000181690 | AAGGCAC  |
| ENSG00000181690 | ACAGU AU |
| ENSG00000181690 | ACUCAAA  |
| ENSG00000181690 | ACUGUAG  |
| ENSG00000181690 | AGAUAAA  |
| ENSG00000181690 | AGCAAAA  |
| ENSG00000181690 | AGCACCA  |
| ENSG00000181690 | AGUAGUU  |
| ENSG00000181690 | AUGCCUU  |
| ENSG00000181690 | AUGGCAC  |
| ENSG00000181690 | CAAAGCA  |
| ENSG00000181690 | CACAGUG  |
| ENSG00000181690 | CACUCCU  |
| ENSG00000181690 | CUGGCUC  |
| ENSG00000181690 | CUUCACC  |
| ENSG00000181690 | CUUGU AU |
| ENSG00000181690 | CUUUGGU  |
| ENSG00000181690 | GAAAACA  |
| ENSG00000181690 | GCACCAU  |
| ENSG00000181690 | GCAGCAU  |
| ENSG00000181690 | GGAAUGU  |
| ENSG00000181690 | GGAGUGU  |
| ENSG00000181690 | GGCUCAG  |
| ENSG00000181690 | GUGCAAA  |
| ENSG00000181690 | UAUGGUU  |
| ENSG00000181690 | UCACAGU  |
| ENSG00000181690 | UCAUUCG  |
| ENSG00000181690 | UGAGAAG  |
| ENSG00000181690 | UGAUCCA  |
| ENSG00000181690 | UGCAGCU  |
| ENSG00000181690 | UUGUGAC  |
| ENSG00000181704 | AAGGCAC  |
| ENSG00000181722 | AAAGAAU  |
| ENSG00000181722 | AGUGCCG  |
| ENSG00000181722 | AGUGCCU  |
| ENSG00000181722 | AUGUAAU  |
| ENSG00000181722 | CAGCAGG  |
| ENSG00000181722 | UAGAGGA  |
| ENSG00000181722 | UUAGAGA  |
| ENSG00000181722 | UUGUUCG  |
| ENSG00000181744 | AAGGCAC  |
| ENSG00000181744 | AAGUUGU  |
| ENSG00000181744 | AUAAAGU  |
| ENSG00000181744 | CACAGGG  |
| ENSG00000181744 | CUUUGGU  |
| ENSG00000181751 | AAGGUGC  |
| ENSG00000181751 | ACCCA UU |

|                 |          |
|-----------------|----------|
| ENSG00000181751 | AUAU AAC |
| ENSG00000181751 | AUUC AUU |
| ENSG00000181751 | CCAG UGC |
| ENSG00000181751 | CUUUG GU |
| ENSG00000181751 | GUGCAA A |
| ENSG00000181751 | UACAG UU |
| ENSG00000181751 | UGAAAUG  |
| ENSG00000181751 | UGACAUC  |
| ENSG00000181751 | UUGGCAA  |
| ENSG00000181751 | UUGGCAC  |
| ENSG00000181754 | AGGAGCU  |
| ENSG00000181754 | GUCUUGC  |
| ENSG00000181773 | AAAAACC  |
| ENSG00000181773 | AACAAAC  |
| ENSG00000181773 | ACUCCAG  |
| ENSG00000181773 | ACUUGGA  |
| ENSG00000181773 | AUGGCUU  |
| ENSG00000181773 | CCCCCAG  |
| ENSG00000181773 | GAGGCUG  |
| ENSG00000181773 | GCCUGGG  |
| ENSG00000181773 | GCUGGUG  |
| ENSG00000181773 | GGCUCUG  |
| ENSG00000181781 | UCCCUUU  |
| ENSG00000181788 | AAAGCUG  |
| ENSG00000181788 | AACUCUA  |
| ENSG00000181788 | AAGACAU  |
| ENSG00000181788 | CAGUAGA  |
| ENSG00000181788 | GGAAGCC  |
| ENSG00000181788 | UGUGCUU  |
| ENSG00000181788 | UUCCUAG  |
| ENSG00000181789 | GUAGUGU  |
| ENSG00000181790 | CUGGCUC  |
| ENSG00000181790 | GGCUCUG  |
| ENSG00000181790 | UGGCUGC  |
| ENSG00000181804 | AAGGCAC  |
| ENSG00000181804 | GAGGUAG  |
| ENSG00000181804 | UGCAGCU  |
| ENSG00000181817 | UGAAAGG  |
| ENSG00000181826 | AAAGCUG  |
| ENSG00000181826 | AAAGUAC  |
| ENSG00000181826 | AAAGUGC  |
| ENSG00000181826 | ACAUCAC  |
| ENSG00000181826 | CUUACAG  |
| ENSG00000181826 | CUUGGAG  |
| ENSG00000181826 | CUUUGGU  |
| ENSG00000181826 | GCAACUU  |
| ENSG00000181826 | GGAACG   |
| ENSG00000181826 | GUAUUCU  |
| ENSG00000181826 | UACAAAG  |
| ENSG00000181826 | UCAAGUA  |
| ENSG00000181826 | UGUUGAA  |
| ENSG00000181826 | UUCCAUA  |
| ENSG00000181826 | UUGACAC  |
| ENSG00000181826 | UUGGCAC  |
| ENSG00000181830 | AAAGCUG  |
| ENSG00000181830 | CCCCUGG  |
| ENSG00000181830 | CCCUGAG  |
| ENSG00000181830 | GCAACUU  |
| ENSG00000181830 | UUGGCAC  |
| ENSG00000181852 | ACCAGCA  |
| ENSG00000181852 | AGCAGCA  |
| ENSG00000181852 | AGCAGCU  |
| ENSG00000181852 | AGGCAGG  |
| ENSG00000181852 | CCCU GUC |

|                 |         |
|-----------------|---------|
| ENSG00000181852 | CUGGCUC |
| ENSG00000181852 | GCUUCCU |
| ENSG00000181852 | GGCAGUG |
| ENSG00000181852 | GUGCUUG |
| ENSG00000181852 | UGAAAGG |
| ENSG00000181852 | UGCAAAG |
| ENSG00000181852 | UUGGCAC |
| ENSG00000181852 | UUUCAAC |
| ENSG00000181856 | AAGUGCU |
| ENSG00000181856 | AGUGCUG |
| ENSG00000181856 | CUCCAC  |
| ENSG00000181856 | GAGGGGC |
| ENSG00000181856 | GGAGGAG |
| ENSG00000181856 | GGGGUGC |
| ENSG00000181856 | GUUUUCU |
| ENSG00000181856 | UCCACC  |
| ENSG00000181856 | UCUGGAG |
| ENSG00000181856 | UGGCCAC |
| ENSG00000181856 | UUCAAAU |
| ENSG00000181885 | ACUGUAG |
| ENSG00000181885 | UAUUACC |
| ENSG00000181904 | AAAGGUA |
| ENSG00000181904 | AGCACCA |
| ENSG00000181904 | UGACAUC |
| ENSG00000181904 | UGCAUAG |
| ENSG00000181915 | AAGCGCU |
| ENSG00000181915 | AAUUUUU |
| ENSG00000181915 | AGCCCUU |
| ENSG00000181915 | AUUCAUU |
| ENSG00000181915 | AUUGCAC |
| ENSG00000181915 | CAGCUGG |
| ENSG00000181915 | GGAAGCC |
| ENSG00000181915 | GUAAACA |
| ENSG00000181915 | UGCAUUG |
| ENSG00000181915 | UGUGCUU |
| ENSG00000181915 | UGUGUCA |
| ENSG00000181915 | UUAGGAU |
| ENSG00000181915 | UUAUGCA |
| ENSG00000181924 | AUCCCUU |
| ENSG00000181924 | UUGGCAC |
| ENSG00000181929 | CUGGGGG |
| ENSG00000181929 | GAUCAGA |
| ENSG00000181929 | GUCAUUG |
| ENSG00000181929 | GUGAGGU |
| ENSG00000181929 | UUAGAGA |
| ENSG00000181938 | GGAAGAC |
| ENSG00000181965 | AAAGUGC |
| ENSG00000181965 | AAGUGCA |
| ENSG00000181965 | AGUGCAA |
| ENSG00000181965 | GUGCAA  |
| ENSG00000181982 | CCCUGG  |
| ENSG00000181982 | CCCUGAG |
| ENSG00000181982 | UCAUUCG |
| ENSG00000182010 | AAAGCUG |
| ENSG00000182010 | ACAGGUG |
| ENSG00000182010 | CAGGUGA |
| ENSG00000182010 | GCAGCAU |
| ENSG00000182010 | GGCAUUG |
| ENSG00000182010 | GGGUGGU |
| ENSG00000182010 | UGACUGU |
| ENSG00000182010 | UGGACUG |
| ENSG00000182010 | UGGGUGA |
| ENSG00000182010 | UUGACAC |
| ENSG00000182010 | UUGUUCG |



|                 |          |
|-----------------|----------|
| ENSG00000182013 | UCUAGAG  |
| ENSG00000182035 | CUGACUC  |
| ENSG00000182040 | AAUACUG  |
| ENSG00000182040 | ACUGCAG  |
| ENSG00000182040 | AUUCAUU  |
| ENSG00000182040 | GCAACUU  |
| ENSG00000182040 | UGGCUGC  |
| ENSG00000182087 | AAGGCAC  |
| ENSG00000182087 | AGCACCA  |
| ENSG00000182087 | AUACAAG  |
| ENSG00000182087 | GGAAUGU  |
| ENSG00000182093 | AGUGGUU  |
| ENSG00000182095 | AAACUGU  |
| ENSG00000182095 | AAGUGCA  |
| ENSG00000182095 | ACAGGUG  |
| ENSG00000182095 | ACAGUAC  |
| ENSG00000182095 | ACAGUAU  |
| ENSG00000182095 | AGCACCA  |
| ENSG00000182095 | AGUGC UU |
| ENSG00000182095 | AUAUAAC  |
| ENSG00000182095 | CACAGUG  |
| ENSG00000182095 | CUCCA UU |
| ENSG00000182095 | CUGGCUC  |
| ENSG00000182095 | GAUUGUC  |
| ENSG00000182095 | GCACCAU  |
| ENSG00000182095 | GUAGUGU  |
| ENSG00000182095 | UAUAAUA  |
| ENSG00000182095 | UCACACA  |
| ENSG00000182095 | UCACAGG  |
| ENSG00000182095 | UGUCUGC  |
| ENSG00000182107 | AAAGAAU  |
| ENSG00000182107 | GCUUCCU  |
| ENSG00000182107 | GUGCCUG  |
| ENSG00000182108 | GGCACGG  |
| ENSG00000182108 | GUAACA   |
| ENSG00000182108 | UAUUGCU  |
| ENSG00000182108 | UUGGCAC  |
| ENSG00000182132 | GGAGGCA  |
| ENSG00000182149 | AAGGCAC  |
| ENSG00000182149 | ACUGGAU  |
| ENSG00000182149 | CCCUGAG  |
| ENSG00000182149 | GGAAGCC  |
| ENSG00000182149 | UGAGAAU  |
| ENSG00000182150 | AUUCAUU  |
| ENSG00000182150 | CUACAAA  |
| ENSG00000182150 | CUCCA UU |
| ENSG00000182150 | GAAACAU  |
| ENSG00000182150 | GAGUAUU  |
| ENSG00000182150 | GGGAACG  |
| ENSG00000182150 | UACAAAG  |
| ENSG00000182150 | UCAUUUG  |
| ENSG00000182150 | UUAGGAU  |
| ENSG00000182158 | AAAGGUA  |
| ENSG00000182158 | AGUGC UU |
| ENSG00000182158 | AUA AUAC |
| ENSG00000182158 | AUUGCAC  |
| ENSG00000182158 | CGGCCUG  |
| ENSG00000182158 | CUCCA UU |
| ENSG00000182158 | CUUUGGU  |
| ENSG00000182158 | GAGCUGC  |
| ENSG00000182158 | GGAAGCC  |
| ENSG00000182158 | GGAGGAG  |
| ENSG00000182158 | GGAUUUU  |
| ENSG00000182158 | UAUAAUA  |

|                 |          |
|-----------------|----------|
| ENSG00000182158 | UGCAAAG  |
| ENSG00000182168 | AAACUGU  |
| ENSG00000182168 | AAAGUUU  |
| ENSG00000182173 | AAGGCAC  |
| ENSG00000182173 | AUGGCUU  |
| ENSG00000182175 | AACAAAC  |
| ENSG00000182175 | ACAGUAC  |
| ENSG00000182175 | ACAUUCA  |
| ENSG00000182175 | ACCAGCA  |
| ENSG00000182175 | AGUGCUU  |
| ENSG00000182175 | AUAAAGU  |
| ENSG00000182175 | CAGCAGG  |
| ENSG00000182175 | CAGCUGG  |
| ENSG00000182175 | CAGUGCA  |
| ENSG00000182175 | CCAGUGU  |
| ENSG00000182175 | CUUGGAG  |
| ENSG00000182175 | GCCUGGG  |
| ENSG00000182175 | UACAGUU  |
| ENSG00000182175 | UGCAUUG  |
| ENSG00000182185 | CUGACUC  |
| ENSG00000182195 | CAAUUGC  |
| ENSG00000182195 | CAGCAGG  |
| ENSG00000182195 | CUGCAGC  |
| ENSG00000182197 | AAUGUUG  |
| ENSG00000182197 | GUGAGGU  |
| ENSG00000182197 | UGCAUAG  |
| ENSG00000182197 | UUCAAAU  |
| ENSG00000182199 | AAAAACC  |
| ENSG00000182199 | AACAAAC  |
| ENSG00000182199 | GAUCAGA  |
| ENSG00000182199 | GGGGUCC  |
| ENSG00000182199 | GGUGGGC  |
| ENSG00000182199 | UCAUUUG  |
| ENSG00000182240 | GAGGUAG  |
| ENSG00000182247 | ACAUCAC  |
| ENSG00000182247 | AUAAUAC  |
| ENSG00000182247 | AUACAAG  |
| ENSG00000182247 | AUGCACC  |
| ENSG00000182247 | GUGAAUG  |
| ENSG00000182247 | GUGCUUG  |
| ENSG00000182247 | UCAAGUA  |
| ENSG00000182247 | UGAUCCA  |
| ENSG00000182247 | UGUGCUU  |
| ENSG00000182255 | UGCAUAG  |
| ENSG00000182263 | AAAGCUG  |
| ENSG00000182263 | AAAGUAC  |
| ENSG00000182263 | AAAGUAU  |
| ENSG00000182263 | AAUCACU  |
| ENSG00000182263 | ACAUAGA  |
| ENSG00000182263 | ACUGUAG  |
| ENSG00000182263 | ACUGUUU  |
| ENSG00000182263 | AGCACCA  |
| ENSG00000182263 | AGUGCUG  |
| ENSG00000182263 | AUAUUUAU |
| ENSG00000182263 | CAGACAG  |
| ENSG00000182263 | CAGCAGG  |
| ENSG00000182263 | CCAGUAC  |
| ENSG00000182263 | CCAGUGC  |
| ENSG00000182263 | CCCUGUU  |
| ENSG00000182263 | GAGGCAG  |
| ENSG00000182263 | GCAGAAG  |
| ENSG00000182263 | GCAGGUU  |
| ENSG00000182263 | GUAAACA  |
| ENSG00000182263 | GUCCAGA  |

|                 |          |
|-----------------|----------|
| ENSG00000182263 | GUGAGGU  |
| ENSG00000182263 | GUGCCAC  |
| ENSG00000182263 | UAAUAUC  |
| ENSG00000182263 | UAUAAAAG |
| ENSG00000182263 | UGAAGUG  |
| ENSG00000182263 | UUGAGGC  |
| ENSG00000182263 | UUGGCAA  |
| ENSG00000182263 | UUUCAAC  |
| ENSG00000182263 | UUUGCAC  |
| ENSG00000182263 | UUUUUGC  |
| ENSG00000182287 | AGCAGCU  |
| ENSG00000182287 | CACAAUG  |
| ENSG00000182287 | CUUACAG  |
| ENSG00000182287 | UAUUACC  |
| ENSG00000182287 | UGAAAUG  |
| ENSG00000182287 | UUGGUUC  |
| ENSG00000182318 | AAGGCAC  |
| ENSG00000182318 | GUAAACA  |
| ENSG00000182318 | UCUGGAA  |
| ENSG00000182324 | AUGGCAC  |
| ENSG00000182324 | CAGCAGG  |
| ENSG00000182324 | GCCUGU   |
| ENSG00000182324 | GGCAUUG  |
| ENSG00000182324 | UUGGCAA  |
| ENSG00000182324 | UUGGCAC  |
| ENSG00000182346 | AUCACUA  |
| ENSG00000182359 | GAGAACC  |
| ENSG00000182359 | GAGAACU  |
| ENSG00000182359 | UGUGCUU  |
| ENSG00000182379 | UCCCUUG  |
| ENSG00000182389 | AACUGGU  |
| ENSG00000182389 | GGUUUAC  |
| ENSG00000182389 | UACAAAG  |
| ENSG00000182389 | UAUAAAAG |
| ENSG00000182389 | UUGGUUC  |
| ENSG00000182400 | AAUCCUU  |
| ENSG00000182400 | CCUGAG   |
| ENSG00000182400 | CUUUGGU  |
| ENSG00000182400 | UGAAAUG  |
| ENSG00000182446 | AAAAGUA  |
| ENSG00000182446 | AAGGCAC  |
| ENSG00000182446 | AAGUCUU  |
| ENSG00000182446 | ACUCAA   |
| ENSG00000182446 | CACUCCU  |
| ENSG00000182446 | CUCAGGG  |
| ENSG00000182446 | CUUUGGU  |
| ENSG00000182446 | GGUUUAC  |
| ENSG00000182446 | GUGUGGC  |
| ENSG00000182450 | CUUUGGU  |
| ENSG00000182472 | AUAU AAC |
| ENSG00000182472 | CUCUGGG  |
| ENSG00000182472 | GUCUCUG  |
| ENSG00000182472 | UCUGGAA  |
| ENSG00000182472 | UCUGGAG  |
| ENSG00000182472 | UGGAUAA  |
| ENSG00000182472 | UGGCUGC  |
| ENSG00000182473 | GGUUUAC  |
| ENSG00000182481 | AAGACAU  |
| ENSG00000182481 | AAGUGCU  |
| ENSG00000182481 | ACAUAGA  |
| ENSG00000182481 | GCUACAU  |
| ENSG00000182481 | UACAGUU  |
| ENSG00000182489 | AAAGCUG  |
| ENSG00000182489 | UCAAGUA  |

|                 |         |
|-----------------|---------|
| ENSG00000182489 | UUGGAGG |
| ENSG00000182500 | AAAGUGC |
| ENSG00000182500 | AAGUGCA |
| ENSG00000182500 | CUCUUCC |
| ENSG00000182504 | AGCACCA |
| ENSG00000182504 | AUAAAGU |
| ENSG00000182508 | UCCCACC |
| ENSG00000182512 | AGUGGUU |
| ENSG00000182512 | UACAGUU |
| ENSG00000182533 | ACAGUAU |
| ENSG00000182533 | AGGACAC |
| ENSG00000182533 | UACAGUU |
| ENSG00000182534 | ACCAGCA |
| ENSG00000182534 | UCCAGAG |
| ENSG00000182541 | AACCUGU |
| ENSG00000182541 | ACCCAUU |
| ENSG00000182541 | AGUAACA |
| ENSG00000182541 | CAGCAGG |
| ENSG00000182541 | CUGCAGG |
| ENSG00000182541 | CUUCACC |
| ENSG00000182541 | GAGAUGA |
| ENSG00000182541 | UCACAGU |
| ENSG00000182541 | UCACAUU |
| ENSG00000182552 | AGAUAAA |
| ENSG00000182552 | UUGGCAA |
| ENSG00000182552 | UUGUGAC |
| ENSG00000182568 | AAAACUG |
| ENSG00000182568 | AAGACAU |
| ENSG00000182568 | AAGGUGC |
| ENSG00000182568 | ACAUAGA |
| ENSG00000182568 | ACUGCAU |
| ENSG00000182568 | ACUGUGU |
| ENSG00000182568 | AGUAACA |
| ENSG00000182568 | AUACAAG |
| ENSG00000182568 | CACUCCU |
| ENSG00000182568 | CAGUCUG |
| ENSG00000182568 | GAAUUGU |
| ENSG00000182568 | GAUUGUC |
| ENSG00000182568 | GGCAGUG |
| ENSG00000182568 | GUAAACA |
| ENSG00000182568 | GUGCAAA |
| ENSG00000182568 | UAAGACG |
| ENSG00000182568 | UAAGACU |
| ENSG00000182568 | UAAUGCU |
| ENSG00000182568 | UACAGUU |
| ENSG00000182568 | UAUAAUA |
| ENSG00000182568 | UCAUAGA |
| ENSG00000182568 | UGAAGCU |
| ENSG00000182568 | UGCAAAG |
| ENSG00000182568 | UUCUAAU |
| ENSG00000182572 | AAAGAGC |
| ENSG00000182572 | GGCUCUG |
| ENSG00000182575 | CAGACAG |
| ENSG00000182575 | GGCCUG  |
| ENSG00000182578 | GAGAACC |
| ENSG00000182578 | GAGAACU |
| ENSG00000182578 | GGCAGUG |
| ENSG00000182578 | UGACUGU |
| ENSG00000182580 | AGCACCA |
| ENSG00000182580 | CCCUGUC |
| ENSG00000182580 | CCCUGUU |
| ENSG00000182580 | GGCGGGG |
| ENSG00000182580 | GUCUCUG |
| ENSG00000182580 | GUGCAAA |

|                 |          |
|-----------------|----------|
| ENSG00000182580 | UAUUGCU  |
| ENSG00000182580 | UCCUGU   |
| ENSG00000182580 | UCCUGAG  |
| ENSG00000182591 | CUGGAAA  |
| ENSG00000182591 | GCAGCAU  |
| ENSG00000182601 | GAGAAAU  |
| ENSG00000182601 | UCAUACA  |
| ENSG00000182601 | UCAUUUG  |
| ENSG00000182601 | UGCAUUG  |
| ENSG00000182606 | AGCAGCA  |
| ENSG00000182606 | AGCAGCG  |
| ENSG00000182606 | AGCAGCU  |
| ENSG00000182606 | AUGCACC  |
| ENSG00000182611 | AAAGAGC  |
| ENSG00000182621 | AAAGUGC  |
| ENSG00000182621 | AAGGCAC  |
| ENSG00000182621 | ACACACU  |
| ENSG00000182621 | CCAGUGC  |
| ENSG00000182621 | UGCAUUAU |
| ENSG00000182636 | AAGUGUG  |
| ENSG00000182636 | AAUACUG  |
| ENSG00000182636 | AAUGUUG  |
| ENSG00000182636 | ACUGCAG  |
| ENSG00000182636 | ACUGCAU  |
| ENSG00000182636 | AGUGUGC  |
| ENSG00000182674 | UAUUGCU  |
| ENSG00000182676 | AAAAGUA  |
| ENSG00000182704 | AAGGCAC  |
| ENSG00000182704 | CAGUCUG  |
| ENSG00000182704 | UCCAGAG  |
| ENSG00000182704 | UUGGCAC  |
| ENSG00000182718 | AAAGUAA  |
| ENSG00000182718 | AAAGUAU  |
| ENSG00000182718 | ACAGUAC  |
| ENSG00000182718 | CUUUGGU  |
| ENSG00000182718 | UCACAUU  |
| ENSG00000182732 | AGCAGCU  |
| ENSG00000182732 | AGGUAGU  |
| ENSG00000182732 | CACCAGC  |
| ENSG00000182732 | CAGCUGG  |
| ENSG00000182732 | GAGCGCC  |
| ENSG00000182732 | GAGGCUG  |
| ENSG00000182732 | GAGGUAG  |
| ENSG00000182732 | GAGGUAU  |
| ENSG00000182732 | GCAGGUU  |
| ENSG00000182732 | GCUGGUG  |
| ENSG00000182732 | GGUUACC  |
| ENSG00000182732 | GUAAACA  |
| ENSG00000182732 | UCACAGG  |
| ENSG00000182732 | UCACAGU  |
| ENSG00000182732 | UCCAGAG  |
| ENSG00000182742 | UCAUUUG  |
| ENSG00000182747 | GUAAACA  |
| ENSG00000182752 | AAAAACC  |
| ENSG00000182752 | AACCUGG  |
| ENSG00000182752 | AACCUGU  |
| ENSG00000182752 | AAGGCAC  |
| ENSG00000182752 | AAGGUGC  |
| ENSG00000182752 | AAGUAGC  |
| ENSG00000182752 | ACACACC  |
| ENSG00000182752 | ACACACU  |
| ENSG00000182752 | ACAGUAU  |
| ENSG00000182752 | ACUGGCU  |
| ENSG00000182752 | AGCAAAA  |

|                 |          |
|-----------------|----------|
| ENSG00000182752 | AGCAGCG  |
| ENSG00000182752 | AGGGAGG  |
| ENSG00000182752 | AGGUUAU  |
| ENSG00000182752 | AUAUAAC  |
| ENSG00000182752 | AUGUAAU  |
| ENSG00000182752 | CACAAUG  |
| ENSG00000182752 | CACAGUG  |
| ENSG00000182752 | CACUGUU  |
| ENSG00000182752 | CAGCAGG  |
| ENSG00000182752 | CUCUAGC  |
| ENSG00000182752 | CUGCAGC  |
| ENSG00000182752 | CUGCAGG  |
| ENSG00000182752 | GAGCUGC  |
| ENSG00000182752 | GAGGUAG  |
| ENSG00000182752 | GAGGUAU  |
| ENSG00000182752 | GCUGGUG  |
| ENSG00000182752 | GGAAGAC  |
| ENSG00000182752 | UAUAAAG  |
| ENSG00000182752 | UCACAGU  |
| ENSG00000182752 | UCCAGAG  |
| ENSG00000182752 | UGCAGCU  |
| ENSG00000182752 | UUGGCAC  |
| ENSG00000182771 | AAAGAGC  |
| ENSG00000182771 | AAAUCCC  |
| ENSG00000182771 | AAUUAUU  |
| ENSG00000182771 | ACAUUCA  |
| ENSG00000182771 | AUACCUC  |
| ENSG00000182771 | AUUCAUU  |
| ENSG00000182771 | CAAUUGC  |
| ENSG00000182771 | CUCCAUU  |
| ENSG00000182771 | CUGCUCA  |
| ENSG00000182771 | GACUUCC  |
| ENSG00000182771 | GAGACCU  |
| ENSG00000182771 | GAGCUGC  |
| ENSG00000182771 | GCUGGUG  |
| ENSG00000182771 | GGCAGUG  |
| ENSG00000182771 | GGGUGGU  |
| ENSG00000182771 | GGUGGGC  |
| ENSG00000182771 | GUCAUUG  |
| ENSG00000182771 | GUCUCUG  |
| ENSG00000182771 | GUGUGGC  |
| ENSG00000182771 | UACAGUU  |
| ENSG00000182771 | UAUAAAG  |
| ENSG00000182771 | UCACAAG  |
| ENSG00000182771 | UCACACA  |
| ENSG00000182771 | UGUGUGG  |
| ENSG00000182771 | UUGGCAA  |
| ENSG00000182782 | AUGGAUU  |
| ENSG00000182782 | UCCAGAG  |
| ENSG00000182791 | AGGGAGG  |
| ENSG00000182795 | UAUAAAG  |
| ENSG00000182827 | AGUGCCG  |
| ENSG00000182827 | CUCCCAA  |
| ENSG00000182827 | GUCUCUG  |
| ENSG00000182831 | AAAGUGC  |
| ENSG00000182831 | AAGUGCU  |
| ENSG00000182831 | AAUUGCU  |
| ENSG00000182831 | ACAAUUAU |
| ENSG00000182831 | ACAGUAC  |
| ENSG00000182831 | ACUGUUU  |
| ENSG00000182831 | AGCAAAA  |
| ENSG00000182831 | AGCAGCA  |
| ENSG00000182831 | AUGAUGC  |
| ENSG00000182831 | CACCAGC  |

|                 |         |
|-----------------|---------|
| ENSG00000182831 | CAGCAGG |
| ENSG00000182831 | CAGUCCA |
| ENSG00000182831 | CUGUUGA |
| ENSG00000182831 | GACCAUG |
| ENSG00000182831 | GAGGAUA |
| ENSG00000182831 | GCAGCAU |
| ENSG00000182831 | GGCAGGG |
| ENSG00000182831 | GGUGGGC |
| ENSG00000182831 | UCCCUUG |
| ENSG00000182831 | UGAAGCU |
| ENSG00000182831 | UGACAUC |
| ENSG00000182831 | UGAGGAC |
| ENSG00000182831 | UGUCUUU |
| ENSG00000182831 | UGUUGAA |
| ENSG00000182831 | UUGACAC |
| ENSG00000182836 | AAAGUAC |
| ENSG00000182836 | AACACUG |
| ENSG00000182836 | AAGAACC |
| ENSG00000182836 | AAGUGCA |
| ENSG00000182836 | ACAAGGU |
| ENSG00000182836 | ACACACC |
| ENSG00000182836 | ACAUUCA |
| ENSG00000182836 | ACUGUAG |
| ENSG00000182836 | AGCCCUU |
| ENSG00000182836 | AUGGCAC |
| ENSG00000182836 | AUGGCUU |
| ENSG00000182836 | AUGUGCC |
| ENSG00000182836 | CCCACCG |
| ENSG00000182836 | CCCACCU |
| ENSG00000182836 | CCUGCUG |
| ENSG00000182836 | CUACAAA |
| ENSG00000182836 | CUCCAUI |
| ENSG00000182836 | CUUCUCU |
| ENSG00000182836 | GACUUCC |
| ENSG00000182836 | GAGAAGA |
| ENSG00000182836 | GCCCUUA |
| ENSG00000182836 | GUGUCAC |
| ENSG00000182836 | UCAUACA |
| ENSG00000182836 | UGUGCUU |
| ENSG00000182866 | GAGGUAU |
| ENSG00000182870 | AAGGCAC |
| ENSG00000182871 | CUUUGGU |
| ENSG00000182872 | UACAAAG |
| ENSG00000182872 | UAUUACC |
| ENSG00000182890 | GUAAACA |
| ENSG00000182890 | UGAGAAG |
| ENSG00000182896 | GCCUGGG |
| ENSG00000182901 | ACAAUAI |
| ENSG00000182901 | AGAUAAA |
| ENSG00000182902 | CAGUGCA |
| ENSG00000182902 | GAGGUAI |
| ENSG00000182909 | CAGCUGG |
| ENSG00000182909 | CAGGCUC |
| ENSG00000182909 | CUGGACU |
| ENSG00000182909 | GGACUGC |
| ENSG00000182909 | UCCAGAG |
| ENSG00000182909 | UGGACUG |
| ENSG00000182923 | AACAAAC |
| ENSG00000182923 | AAGUCAC |
| ENSG00000182923 | GAGAAAU |
| ENSG00000182923 | GGAUUUU |
| ENSG00000182931 | GGUUUAC |
| ENSG00000182934 | AGCAGCG |
| ENSG00000182934 | AGCAGCU |

|                 |          |
|-----------------|----------|
| ENSG00000182934 | AUAU AAC |
| ENSG00000182934 | CAAGAGC  |
| ENSG00000182934 | CAGACAG  |
| ENSG00000182934 | CUGCAGC  |
| ENSG00000182934 | CUUCACC  |
| ENSG00000182934 | GGCAGUG  |
| ENSG00000182934 | UAUUGCU  |
| ENSG00000182944 | AAAUUUC  |
| ENSG00000182944 | GGUUUAC  |
| ENSG00000182952 | AAAAAUC  |
| ENSG00000182952 | AAAACUG  |
| ENSG00000182957 | CAGCUGG  |
| ENSG00000182963 | AAAGUUU  |
| ENSG00000182963 | AACAUUC  |
| ENSG00000182963 | AACUACU  |
| ENSG00000182963 | AAGGCAC  |
| ENSG00000182963 | AAUGUUG  |
| ENSG00000182963 | AAUUAUU  |
| ENSG00000182963 | ACUCAAA  |
| ENSG00000182963 | ACUGUAG  |
| ENSG00000182963 | AGUGCCG  |
| ENSG00000182963 | AUGUGCC  |
| ENSG00000182963 | CCCCUGG  |
| ENSG00000182963 | CUUUGGU  |
| ENSG00000182963 | GAGGU AU |
| ENSG00000182963 | GAGUAUU  |
| ENSG00000182963 | GCAGGUU  |
| ENSG00000182963 | GCAUCCC  |
| ENSG00000182963 | GCCUGAU  |
| ENSG00000182963 | GGCUCUG  |
| ENSG00000182963 | GUAUUCU  |
| ENSG00000182963 | UCUGGAA  |
| ENSG00000182963 | UUCAAAU  |
| ENSG00000182963 | UUCUGCA  |
| ENSG00000182968 | AAUACUG  |
| ENSG00000182968 | ACUGUAG  |
| ENSG00000182968 | AGCAAAA  |
| ENSG00000182968 | AUGCAUU  |
| ENSG00000182968 | CAGUCUG  |
| ENSG00000182968 | CUACAGU  |
| ENSG00000182968 | GCAUCCC  |
| ENSG00000182968 | GCUGUCU  |
| ENSG00000182968 | UAAUGCU  |
| ENSG00000182968 | UACAAAG  |
| ENSG00000182968 | UUGGUUC  |
| ENSG00000182973 | GUAACAG  |
| ENSG00000182979 | AAAAAUC  |
| ENSG00000182979 | AACAUUC  |
| ENSG00000182979 | GUAAACA  |
| ENSG00000182979 | UAAUAUC  |
| ENSG00000182985 | AAGGCAC  |
| ENSG00000182985 | CAGCAGG  |
| ENSG00000182985 | CAGUGCA  |
| ENSG00000182985 | UACAAAG  |
| ENSG00000182985 | UAGUGAG  |
| ENSG00000182985 | UUUGCAA  |
| ENSG00000183020 | UCCCUUG  |
| ENSG00000183023 | AAAACUG  |
| ENSG00000183023 | ACACACC  |
| ENSG00000183023 | ACACACU  |
| ENSG00000183023 | AUAU AAC |
| ENSG00000183023 | CAGACAG  |
| ENSG00000183023 | CAGCAGA  |
| ENSG00000183023 | CAGGUGA  |



|                 |          |
|-----------------|----------|
| ENSG00000183023 | GGAAUGU  |
| ENSG00000183023 | GGAGGCA  |
| ENSG00000183023 | GGCCUG   |
| ENSG00000183023 | GGUUUA   |
| ENSG00000183023 | UAUUGCU  |
| ENSG00000183023 | UGAAGCU  |
| ENSG00000183023 | UGCAAAG  |
| ENSG00000183023 | UGUGUCA  |
| ENSG00000183023 | UUCCUCG  |
| ENSG00000183044 | AAAAAUC  |
| ENSG00000183044 | AGGAUGU  |
| ENSG00000183044 | AUGGCUU  |
| ENSG00000183044 | CAUGGAU  |
| ENSG00000183044 | CCAGGAG  |
| ENSG00000183044 | CUUUGGU  |
| ENSG00000183044 | GAGGAUA  |
| ENSG00000183044 | GGACCUG  |
| ENSG00000183044 | GGUUACC  |
| ENSG00000183044 | UAAGACU  |
| ENSG00000183044 | UAUAAAAG |
| ENSG00000183044 | UGCAUAG  |
| ENSG00000183044 | UGUGCUU  |
| ENSG00000183049 | AGCACCA  |
| ENSG00000183049 | GAAGGUC  |
| ENSG00000183049 | GAGAAGA  |
| ENSG00000183049 | GCACCAU  |
| ENSG00000183049 | UUGUGAC  |
| ENSG00000183072 | AAAAACC  |
| ENSG00000183087 | AAAAAUC  |
| ENSG00000183087 | AAUUAUU  |
| ENSG00000183092 | AAAAAUC  |
| ENSG00000183092 | ACAGUAU  |
| ENSG00000183092 | GAGGUAU  |
| ENSG00000183092 | UAUAAAAG |
| ENSG00000183092 | UGUCUUU  |
| ENSG00000183114 | ACAUAGA  |
| ENSG00000183114 | CUUUGGU  |
| ENSG00000183114 | GAUCAGA  |
| ENSG00000183114 | UUGGUCC  |
| ENSG00000183117 | AAAAACC  |
| ENSG00000183117 | AAUGCCC  |
| ENSG00000183117 | AAUUAUU  |
| ENSG00000183117 | ACACACU  |
| ENSG00000183117 | ACUGUUU  |
| ENSG00000183117 | AGAUGUG  |
| ENSG00000183117 | AGCAGCA  |
| ENSG00000183117 | AGCCUGC  |
| ENSG00000183117 | AGUGUGC  |
| ENSG00000183117 | AUAAUAC  |
| ENSG00000183117 | AUAUUAU  |
| ENSG00000183117 | AUGGCUU  |
| ENSG00000183117 | GAGGCAG  |
| ENSG00000183117 | GAGGUAU  |
| ENSG00000183117 | GGCAAGA  |
| ENSG00000183117 | GGCAGUG  |
| ENSG00000183117 | UAAUAUC  |
| ENSG00000183117 | UAUUGCU  |
| ENSG00000183117 | UGAAAGG  |
| ENSG00000183117 | UGCCAGC  |
| ENSG00000183117 | UUUUUGC  |
| ENSG00000183137 | GAAACAU  |
| ENSG00000183137 | GUGACAG  |
| ENSG00000183155 | GAAAACA  |
| ENSG00000183155 | UUCUGCA  |

|                 |          |
|-----------------|----------|
| ENSG00000183155 | UUGGCAA  |
| ENSG00000183155 | UUGGCAC  |
| ENSG00000183160 | CCCUGUC  |
| ENSG00000183160 | GGAUGAG  |
| ENSG00000183161 | GUAAACA  |
| ENSG00000183166 | AAGUUGU  |
| ENSG00000183166 | ACUUGGA  |
| ENSG00000183166 | AGCCCUU  |
| ENSG00000183166 | AGGGUUG  |
| ENSG00000183166 | AUAAAGU  |
| ENSG00000183166 | AUAU AAC |
| ENSG00000183166 | AUAUUAU  |
| ENSG00000183166 | AUGGCAC  |
| ENSG00000183166 | AUGGCUU  |
| ENSG00000183166 | CACAGUG  |
| ENSG00000183166 | CAGCAA   |
| ENSG00000183166 | CAGCAGG  |
| ENSG00000183166 | CUCAGGG  |
| ENSG00000183166 | CUGCCCC  |
| ENSG00000183166 | CUGGACU  |
| ENSG00000183166 | GAGGUAG  |
| ENSG00000183166 | GAGGU AU |
| ENSG00000183166 | GAGUCUU  |
| ENSG00000183166 | GGAGAGA  |
| ENSG00000183166 | GGGAGCU  |
| ENSG00000183166 | GGUGCGG  |
| ENSG00000183166 | GUCUGCC  |
| ENSG00000183166 | GUGCCUG  |
| ENSG00000183166 | GUGCUUG  |
| ENSG00000183166 | UAAUAGU  |
| ENSG00000183166 | UACAAAG  |
| ENSG00000183166 | UAGACUG  |
| ENSG00000183166 | UAUUGCU  |
| ENSG00000183166 | UCAACAG  |
| ENSG00000183166 | UCCUGAG  |
| ENSG00000183166 | UCUGGAA  |
| ENSG00000183166 | UGAGUCU  |
| ENSG00000183166 | UGCAU AU |
| ENSG00000183166 | UGCUGAC  |
| ENSG00000183166 | UUAGAGA  |
| ENSG00000183166 | UUGGCAA  |
| ENSG00000183172 | GAGGCUG  |
| ENSG00000183207 | UCACAGU  |
| ENSG00000183242 | ACAGGUG  |
| ENSG00000183242 | AUAU AAC |
| ENSG00000183242 | CAUGGGU  |
| ENSG00000183242 | CUGCUC A |
| ENSG00000183242 | CUGGGGG  |
| ENSG00000183242 | GCAGAAG  |
| ENSG00000183242 | GGAAGCC  |
| ENSG00000183242 | GGCAUUG  |
| ENSG00000183242 | GGGAGCU  |
| ENSG00000183242 | GGGUCC   |
| ENSG00000183242 | GGUGCGG  |
| ENSG00000183242 | UAAUGCU  |
| ENSG00000183242 | UCCAGAG  |
| ENSG00000183242 | UGGCCAC  |
| ENSG00000183242 | UUCUAAU  |
| ENSG00000183242 | UUUGCAA  |
| ENSG00000183255 | AAUGCCC  |
| ENSG00000183255 | CAA AUGC |
| ENSG00000183283 | AAACUGU  |
| ENSG00000183283 | AAAGUGC  |
| ENSG00000183283 | ACCACAG  |

|                 |         |
|-----------------|---------|
| ENSG00000183283 | AGUGCUG |
| ENSG00000183283 | AUUCAUU |
| ENSG00000183283 | CACAGUG |
| ENSG00000183283 | CAGUUAC |
| ENSG00000183283 | CCCUGAG |
| ENSG00000183283 | GAGAAGA |
| ENSG00000183283 | GCCUGAU |
| ENSG00000183283 | UAAUAUC |
| ENSG00000183283 | UGAGAAG |
| ENSG00000183283 | UUCAAAU |
| ENSG00000183283 | UUCCAUA |
| ENSG00000183287 | CUGGGCA |
| ENSG00000183307 | AAAGCUG |
| ENSG00000183307 | ACCCUGU |
| ENSG00000183307 | AGCAGCA |
| ENSG00000183307 | AGGUAGU |
| ENSG00000183307 | CAGCAA  |
| ENSG00000183307 | CAGGCUC |
| ENSG00000183307 | CAGUGCA |
| ENSG00000183307 | GAGGUAG |
| ENSG00000183307 | GCAACUU |
| ENSG00000183307 | GCAGCAU |
| ENSG00000183307 | GGAGAGA |
| ENSG00000183307 | GGCUCAG |
| ENSG00000183307 | GUAAACA |
| ENSG00000183307 | GUGAGGU |
| ENSG00000183307 | UAGGUAU |
| ENSG00000183307 | UAGUGAG |
| ENSG00000183307 | UCACAGU |
| ENSG00000183307 | UCUCAAG |
| ENSG00000183307 | UGCUCAC |
| ENSG00000183307 | UUGGUCC |
| ENSG00000183307 | UUUGCAA |
| ENSG00000183317 | AAAAAUC |
| ENSG00000183317 | AAGGCAC |
| ENSG00000183317 | ACCCUGU |
| ENSG00000183317 | AGCACCA |
| ENSG00000183317 | CACUCCU |
| ENSG00000183317 | CCCUGAG |
| ENSG00000183317 | UUCCAUA |
| ENSG00000183337 | AAGUCUU |
| ENSG00000183337 | AGUGCCU |
| ENSG00000183337 | UAAUAGU |
| ENSG00000183337 | UAUGGUU |
| ENSG00000183354 | AAUGCCC |
| ENSG00000183354 | AAUUUUA |
| ENSG00000183354 | AUGUAAU |
| ENSG00000183379 | CUGCAGG |
| ENSG00000183386 | AUUGCAC |
| ENSG00000183386 | GCAGAAG |
| ENSG00000183386 | UAUUGCU |
| ENSG00000183386 | UCUGGAA |
| ENSG00000183423 | AAUUAAU |
| ENSG00000183431 | AGAUAAA |
| ENSG00000183431 | AGCAAAA |
| ENSG00000183431 | AUGCCUU |
| ENSG00000183431 | CCAGCAU |
| ENSG00000183431 | GAGAAAU |
| ENSG00000183431 | UGCCAGC |
| ENSG00000183434 | UCCUGAG |
| ENSG00000183454 | AAUCUCA |
| ENSG00000183454 | AAUCUCU |
| ENSG00000183454 | AUGCAUU |
| ENSG00000183454 | CACCAGC |

|                 |          |
|-----------------|----------|
| ENSG00000183454 | CAUAUUG  |
| ENSG00000183454 | CCCUGAG  |
| ENSG00000183454 | CUAUACA  |
| ENSG00000183454 | UGCAGCU  |
| ENSG00000183454 | UGUGUCA  |
| ENSG00000183454 | UUAUGCA  |
| ENSG00000183475 | GUGCAAA  |
| ENSG00000183475 | UGCAUUAU |
| ENSG00000183484 | AUAAAGU  |
| ENSG00000183496 | AAAGUAA  |
| ENSG00000183496 | AAAGUAU  |
| ENSG00000183496 | AACAUUC  |
| ENSG00000183496 | AAUACUG  |
| ENSG00000183496 | AUACAAG  |
| ENSG00000183496 | AUCAUAC  |
| ENSG00000183496 | CCAUUAC  |
| ENSG00000183496 | CUACAAA  |
| ENSG00000183496 | CUCCAUU  |
| ENSG00000183496 | GAUAUGU  |
| ENSG00000183496 | UAAUACA  |
| ENSG00000183496 | UGCUCAC  |
| ENSG00000183496 | UGGGUGA  |
| ENSG00000183496 | UUCAAGC  |
| ENSG00000183496 | UUUCAAC  |
| ENSG00000183496 | UUUGCAA  |
| ENSG00000183508 | AAAGAAU  |
| ENSG00000183508 | AACAUUC  |
| ENSG00000183508 | AAGUGCA  |
| ENSG00000183508 | AAUACUG  |
| ENSG00000183508 | ACAUUCA  |
| ENSG00000183508 | ACCCAUU  |
| ENSG00000183508 | ACUGUUU  |
| ENSG00000183508 | ACUUGGA  |
| ENSG00000183508 | AGUGCUU  |
| ENSG00000183508 | CACAGGG  |
| ENSG00000183508 | CACCACC  |
| ENSG00000183508 | CACUGUU  |
| ENSG00000183508 | CAGUUAC  |
| ENSG00000183508 | GGAAGAC  |
| ENSG00000183508 | GGCUCAG  |
| ENSG00000183508 | GUCAGUU  |
| ENSG00000183508 | GUGCAAA  |
| ENSG00000183508 | UCUCAAG  |
| ENSG00000183508 | UGGGUAC  |
| ENSG00000183508 | UUCCUAG  |
| ENSG00000183508 | UUGGUCC  |
| ENSG00000183513 | AGGAUGU  |
| ENSG00000183520 | UACAAAG  |
| ENSG00000183527 | AAAGUAA  |
| ENSG00000183558 | AAAGAGC  |
| ENSG00000183570 | AAGUGCU  |
| ENSG00000183570 | AGUGCUG  |
| ENSG00000183576 | AAUCACU  |
| ENSG00000183576 | AAUCUCU  |
| ENSG00000183576 | AGCAAAA  |
| ENSG00000183576 | AUAAAGU  |
| ENSG00000183576 | AUCACUA  |
| ENSG00000183576 | CUGCAGC  |
| ENSG00000183576 | CUGCAGG  |
| ENSG00000183576 | GCAGAAG  |
| ENSG00000183576 | UAUAAAAG |
| ENSG00000183578 | ACACACC  |
| ENSG00000183578 | AGGCAGG  |
| ENSG00000183578 | GAAAACA  |

|                 |         |
|-----------------|---------|
| ENSG00000183578 | UCCCUCU |
| ENSG00000183579 | AAGGCAC |
| ENSG00000183579 | AAGUGCA |
| ENSG00000183579 | ACAGGUG |
| ENSG00000183579 | ACAGUAU |
| ENSG00000183579 | AGCAGCA |
| ENSG00000183579 | AGCAGCU |
| ENSG00000183579 | AGCCCUU |
| ENSG00000183579 | AGGCAGG |
| ENSG00000183579 | AGGGUUG |
| ENSG00000183579 | AGUAGAC |
| ENSG00000183579 | AGUGCAA |
| ENSG00000183579 | AGUGCCG |
| ENSG00000183579 | AUAUUAU |
| ENSG00000183579 | AUGUAAU |
| ENSG00000183579 | CACACCU |
| ENSG00000183579 | CCCCCAG |
| ENSG00000183579 | CCCUGAG |
| ENSG00000183579 | CUAUACA |
| ENSG00000183579 | CUCACAC |
| ENSG00000183579 | CUGCAGG |
| ENSG00000183579 | CUGGAAA |
| ENSG00000183579 | GAGAACC |
| ENSG00000183579 | GAGCCCU |
| ENSG00000183579 | GCAGCAU |
| ENSG00000183579 | GGAGUCC |
| ENSG00000183579 | GUGCAA  |
| ENSG00000183579 | GUUAAUG |
| ENSG00000183579 | UAAUAGU |
| ENSG00000183579 | UAAUGCU |
| ENSG00000183579 | UCAAGUA |
| ENSG00000183579 | UCACAUU |
| ENSG00000183579 | UCAUUUG |
| ENSG00000183579 | UCCCACA |
| ENSG00000183579 | UCCCUUU |
| ENSG00000183579 | UGAAAUG |
| ENSG00000183579 | UGAGAAG |
| ENSG00000183579 | UUCUAAU |
| ENSG00000183579 | UUCUGCA |
| ENSG00000183579 | UUGGAGG |
| ENSG00000183579 | UUGGUCC |
| ENSG00000183579 | UUGUGUC |
| ENSG00000183579 | UUUCAAC |
| ENSG00000183580 | AGAUGUG |
| ENSG00000183580 | AGCAUUC |
| ENSG00000183580 | AUGUGCC |
| ENSG00000183580 | CAUAUUG |
| ENSG00000183580 | CUACAGU |
| ENSG00000183580 | CUUGGAG |
| ENSG00000183580 | GAAGGAA |
| ENSG00000183580 | GUGCCUG |
| ENSG00000183580 | UAUUGCU |
| ENSG00000183580 | UCUAGAG |
| ENSG00000183580 | UUCUUGU |
| ENSG00000183615 | CUCUGGG |
| ENSG00000183638 | CAAAGUG |
| ENSG00000183638 | CUGCAGC |
| ENSG00000183638 | CUGCAGG |
| ENSG00000183643 | ACUUGGA |
| ENSG00000183643 | CUCUGGG |
| ENSG00000183643 | GCUGUCU |
| ENSG00000183643 | UGGAUAA |
| ENSG00000183655 | AGCACCA |
| ENSG00000183662 | AAAGUGC |

|                 |         |
|-----------------|---------|
| ENSG00000183662 | AAGUGCA |
| ENSG00000183662 | AGUGCAA |
| ENSG00000183682 | AGCAGCA |
| ENSG00000183682 | GUCACUC |
| ENSG00000183688 | AAAGUAU |
| ENSG00000183688 | AGCAAAA |
| ENSG00000183688 | AGCAGCA |
| ENSG00000183688 | GGAAUGU |
| ENSG00000183691 | ACACACC |
| ENSG00000183691 | ACACACU |
| ENSG00000183691 | ACAGUAC |
| ENSG00000183691 | ACAGUAU |
| ENSG00000183691 | CAGUAGA |
| ENSG00000183691 | UAUAAUA |
| ENSG00000183715 | AAAAAUC |
| ENSG00000183715 | AAAGUGC |
| ENSG00000183715 | AACUACU |
| ENSG00000183715 | AAUUAUU |
| ENSG00000183715 | ACCCAUU |
| ENSG00000183715 | AGGUAGU |
| ENSG00000183715 | AGUGCUU |
| ENSG00000183715 | AUUCAUU |
| ENSG00000183715 | CACACCU |
| ENSG00000183715 | CUCUUC  |
| ENSG00000183715 | CUUUGGU |
| ENSG00000183715 | GUAACAG |
| ENSG00000183715 | GUUAAUG |
| ENSG00000183715 | UAUUGCU |
| ENSG00000183715 | UCAUUUG |
| ENSG00000183715 | UGACAUC |
| ENSG00000183715 | UGAGAAU |
| ENSG00000183715 | UUAGAGA |
| ENSG00000183718 | ACUGUUU |
| ENSG00000183718 | CACUGUU |
| ENSG00000183722 | CUUUGGU |
| ENSG00000183722 | UCACAGG |
| ENSG00000183722 | UCACAGU |
| ENSG00000183722 | UGUGCUU |
| ENSG00000183722 | UUGAUCA |
| ENSG00000183722 | UUUCAAC |
| ENSG00000183723 | AGUAACA |
| ENSG00000183723 | CAGCAAA |
| ENSG00000183723 | GGGCCCC |
| ENSG00000183723 | UCACCAC |
| ENSG00000183723 | UCAUUUG |
| ENSG00000183723 | UGAGAAG |
| ENSG00000183723 | UGCAGCU |
| ENSG00000183723 | UUCAAGC |
| ENSG00000183723 | UUUCAAC |
| ENSG00000183726 | AGUGGUU |
| ENSG00000183726 | GGACCUG |
| ENSG00000183735 | AUGGCUU |
| ENSG00000183741 | ACUUGGA |
| ENSG00000183741 | AGCACCA |
| ENSG00000183741 | AGCCCUU |
| ENSG00000183741 | AGCUGCC |
| ENSG00000183741 | AUGACAC |
| ENSG00000183741 | CAAAACU |
| ENSG00000183741 | CAAAGCA |
| ENSG00000183741 | CUGGAAA |
| ENSG00000183741 | CUUUGGU |
| ENSG00000183741 | GCCCUUA |
| ENSG00000183741 | GGACGGA |
| ENSG00000183741 | GGGGGAA |

|                 |         |
|-----------------|---------|
| ENSG00000183741 | GUCUCUG |
| ENSG00000183741 | UACAAAG |
| ENSG00000183741 | UGCAAAG |
| ENSG00000183741 | UUGGCAC |
| ENSG00000183741 | UUUGCAC |
| ENSG00000183748 | UGCCAGC |
| ENSG00000183762 | AACAAAC |
| ENSG00000183762 | AACAUUC |
| ENSG00000183762 | ACAUUCA |
| ENSG00000183762 | AUAUUAU |
| ENSG00000183762 | CAAAGUG |
| ENSG00000183762 | CACACCU |
| ENSG00000183762 | CACCACC |
| ENSG00000183762 | CAGCAGG |
| ENSG00000183762 | CAGCUGG |
| ENSG00000183762 | CUCAAAC |
| ENSG00000183762 | CUGCAGG |
| ENSG00000183762 | GAAGGUC |
| ENSG00000183762 | GACCUGG |
| ENSG00000183762 | GAGGUAG |
| ENSG00000183762 | GUAAACA |
| ENSG00000183762 | UACAAAG |
| ENSG00000183762 | UCCCUUU |
| ENSG00000183762 | UCUCAAG |
| ENSG00000183762 | UCUUGAG |
| ENSG00000183762 | UGAGAAU |
| ENSG00000183762 | UGCAUAG |
| ENSG00000183762 | UGUAUAA |
| ENSG00000183762 | UUGAUCA |
| ENSG00000183763 | CCUGCUG |
| ENSG00000183763 | GGCAGGG |
| ENSG00000183763 | GGGGCAG |
| ENSG00000183770 | AAGUGCU |
| ENSG00000183770 | UCACAUU |
| ENSG00000183773 | CAGCAGA |
| ENSG00000183773 | UUGGCAC |
| ENSG00000183775 | AAACUGU |
| ENSG00000183775 | AAGGUGC |
| ENSG00000183775 | ACUGUGU |
| ENSG00000183775 | AGGCAGG |
| ENSG00000183775 | AGGGAGG |
| ENSG00000183775 | CAGUAGU |
| ENSG00000183775 | CUAUACA |
| ENSG00000183775 | CUUGUGU |
| ENSG00000183775 | GAGGUAG |
| ENSG00000183775 | UAUUACC |
| ENSG00000183775 | UCAAGUA |
| ENSG00000183775 | UGGGAUC |
| ENSG00000183775 | UGUGCUU |
| ENSG00000183775 | UUGGCAC |
| ENSG00000183778 | CAGGCUC |
| ENSG00000183779 | GUUAAUG |
| ENSG00000183779 | UAAUGCU |
| ENSG00000183780 | AAGGCAC |
| ENSG00000183780 | UCACAGU |
| ENSG00000183783 | AGCAGCA |
| ENSG00000183785 | CAGCAGG |
| ENSG00000183798 | CAGCAGA |
| ENSG00000183798 | GGCUCUG |
| ENSG00000183798 | UGAAGCU |
| ENSG00000183808 | AAUACUG |
| ENSG00000183808 | CAGUCUG |
| ENSG00000183808 | UCAAGUA |
| ENSG00000183808 | UCACAGU |

|                 |         |
|-----------------|---------|
| ENSG00000183814 | AUACAAG |
| ENSG00000183826 | AAAGAGG |
| ENSG00000183826 | AACAAAC |
| ENSG00000183826 | AAUUUUA |
| ENSG00000183826 | ACCAAUU |
| ENSG00000183826 | ACUCAGC |
| ENSG00000183826 | ACUCCAG |
| ENSG00000183826 | AUAAUAC |
| ENSG00000183826 | CAGGAAC |
| ENSG00000183826 | CCAGUGC |
| ENSG00000183826 | CCAGUGU |
| ENSG00000183826 | CUGCAGC |
| ENSG00000183826 | GAGCUGC |
| ENSG00000183826 | GAGGUAG |
| ENSG00000183826 | GGGUGUU |
| ENSG00000183826 | GUUAAUG |
| ENSG00000183826 | UAUAAUA |
| ENSG00000183826 | UCAUUUG |
| ENSG00000183826 | UGAGAAU |
| ENSG00000183826 | UGCCAGC |
| ENSG00000183826 | UGCUGAC |
| ENSG00000183826 | UUAGAGA |
| ENSG00000183826 | UUGACAC |
| ENSG00000183826 | UUGGCAA |
| ENSG00000183831 | CUUGGAG |
| ENSG00000183831 | UAAUAUC |
| ENSG00000183833 | AAAAAUC |
| ENSG00000183833 | UCCAGUU |
| ENSG00000183840 | AAAGAGC |
| ENSG00000183853 | AGCACCA |
| ENSG00000183853 | CUGCCCC |
| ENSG00000183853 | GAGACCU |
| ENSG00000183853 | GCACCAU |
| ENSG00000183853 | GGGUGUU |
| ENSG00000183856 | CUGCAGG |
| ENSG00000183856 | GGCCUG  |
| ENSG00000183862 | GAGUUGA |
| ENSG00000183864 | AAACUGU |
| ENSG00000183864 | AAAGAAU |
| ENSG00000183864 | AACAUUC |
| ENSG00000183864 | AAGGCAC |
| ENSG00000183864 | AAUUAUU |
| ENSG00000183864 | AGUGCAA |
| ENSG00000183864 | CCUUCAU |
| ENSG00000183864 | CUGGAAA |
| ENSG00000183864 | CUUACAG |
| ENSG00000183864 | GAGAUGA |
| ENSG00000183864 | GAGGUAG |
| ENSG00000183864 | GAUUGUC |
| ENSG00000183864 | GGCAGGG |
| ENSG00000183864 | GGCAGUG |
| ENSG00000183864 | UACAAAG |
| ENSG00000183864 | UCCUGAG |
| ENSG00000183864 | UGAAGCU |
| ENSG00000183864 | UUUUUGC |
| ENSG00000183873 | AAAUUUC |
| ENSG00000183873 | AAGUGCU |
| ENSG00000183873 | AAUACUG |
| ENSG00000183873 | AGCAGCU |
| ENSG00000183873 | CCCUGAG |
| ENSG00000183873 | CUCUUC  |
| ENSG00000183873 | GAGGUAG |
| ENSG00000183873 | GAUUGUC |
| ENSG00000183873 | UCCUGU  |



|                 |          |
|-----------------|----------|
| ENSG00000183873 | UGCAUUAU |
| ENSG00000183878 | ACUCAAAA |
| ENSG00000183878 | AGAUGUG  |
| ENSG00000183878 | AUGUGCC  |
| ENSG00000183878 | CAAAACU  |
| ENSG00000183878 | CUACAAA  |
| ENSG00000183878 | GCAGAAG  |
| ENSG00000183878 | GUAGUGU  |
| ENSG00000183878 | GUCCAGA  |
| ENSG00000183878 | GUGCAAA  |
| ENSG00000183878 | UCACAAG  |
| ENSG00000183878 | UCCAGUU  |
| ENSG00000183878 | UCCUGAG  |
| ENSG00000183878 | UCUGGAA  |
| ENSG00000183878 | UGCAUUAU |
| ENSG00000183900 | AAAAGUA  |
| ENSG00000183900 | AAAGUAC  |
| ENSG00000183900 | AAUCUCU  |
| ENSG00000183900 | CUUACAG  |
| ENSG00000183900 | UGAGAAU  |
| ENSG00000183900 | UGCCAGC  |
| ENSG00000183908 | CUGGAAA  |
| ENSG00000183908 | GCAGCAU  |
| ENSG00000183908 | GGCAGUG  |
| ENSG00000183908 | UGUGCUU  |
| ENSG00000183918 | GAGCCCU  |
| ENSG00000183918 | GUCUCUG  |
| ENSG00000183943 | AAAGUUU  |
| ENSG00000183943 | GUGCAAA  |
| ENSG00000183943 | UACAAAG  |
| ENSG00000183943 | UAUAAAAG |
| ENSG00000183943 | UGUCUUU  |
| ENSG00000183955 | AAGUUGU  |
| ENSG00000183955 | ACUGCAU  |
| ENSG00000183955 | AGCACCA  |
| ENSG00000183955 | AGGUAGU  |
| ENSG00000183955 | CAAGAGC  |
| ENSG00000183955 | CUACAGU  |
| ENSG00000183955 | CUUGUAU  |
| ENSG00000183955 | GUUCAUG  |
| ENSG00000183955 | UAAUAUC  |
| ENSG00000183955 | UAGGUAU  |
| ENSG00000183955 | UAUAAAAG |
| ENSG00000183955 | UCCCUUG  |
| ENSG00000183955 | UGUAUGU  |
| ENSG00000183955 | UUCCUAG  |
| ENSG00000183955 | UUGAGGC  |
| ENSG00000183960 | AAAAAUC  |
| ENSG00000183960 | AACAUUC  |
| ENSG00000183960 | ACAUUCA  |
| ENSG00000183960 | ACUGCAU  |
| ENSG00000183960 | CAGCAGA  |
| ENSG00000183960 | CAUACAA  |
| ENSG00000183960 | CUGCUCU  |
| ENSG00000183960 | GAGAUGA  |
| ENSG00000183960 | GAUUGUA  |
| ENSG00000183960 | UAUAAAAG |
| ENSG00000183960 | UCAUACA  |
| ENSG00000183960 | UCCCUUU  |
| ENSG00000183960 | UGCAAAG  |
| ENSG00000183960 | UUGAUCA  |
| ENSG00000184005 | ACAGUAU  |
| ENSG00000184005 | ACUGGCC  |
| ENSG00000184005 | AUAAAAGU |

|                 |          |
|-----------------|----------|
| ENSG00000184005 | UACAGUU  |
| ENSG00000184005 | UAUUACC  |
| ENSG00000184007 | AAAGUGC  |
| ENSG00000184007 | CCUUCAU  |
| ENSG00000184007 | GCUGGUG  |
| ENSG00000184007 | UCCAGAG  |
| ENSG00000184009 | ACCCUGU  |
| ENSG00000184009 | AGUGCUG  |
| ENSG00000184009 | CAA AUGC |
| ENSG00000184009 | CACAAUG  |
| ENSG00000184009 | GAGGCUG  |
| ENSG00000184009 | GCAGCAU  |
| ENSG00000184009 | GCUAGCA  |
| ENSG00000184012 | GAGGU AU |
| ENSG00000184047 | AGCACCA  |
| ENSG00000184058 | AAAGAGG  |
| ENSG00000184058 | UUGGCAC  |
| ENSG00000184083 | AAACUGU  |
| ENSG00000184083 | AAAGAGC  |
| ENSG00000184083 | AAAGAGG  |
| ENSG00000184083 | AAAGCUG  |
| ENSG00000184083 | AAUACUG  |
| ENSG00000184083 | ACAUUCA  |
| ENSG00000184083 | ACCAGCA  |
| ENSG00000184083 | ACUGGCU  |
| ENSG00000184083 | AUAAAAGU |
| ENSG00000184083 | AUAUAAC  |
| ENSG00000184083 | CAAAGCA  |
| ENSG00000184083 | CACAGUG  |
| ENSG00000184083 | CAGCAGA  |
| ENSG00000184083 | CCUUCAU  |
| ENSG00000184083 | CUAGGCU  |
| ENSG00000184083 | CUGCCCC  |
| ENSG00000184083 | CUGGGCA  |
| ENSG00000184083 | GAGGCAG  |
| ENSG00000184083 | GGCAAGA  |
| ENSG00000184083 | GGCUCAG  |
| ENSG00000184083 | GGUUGUC  |
| ENSG00000184083 | GUCAGUU  |
| ENSG00000184083 | GUCUACU  |
| ENSG00000184083 | GUCUCUG  |
| ENSG00000184083 | UACAAAG  |
| ENSG00000184083 | UAUAAAAG |
| ENSG00000184083 | UCACAGU  |
| ENSG00000184083 | UCUGGAA  |
| ENSG00000184083 | UGCAAAG  |
| ENSG00000184083 | UGGGACA  |
| ENSG00000184083 | UUAGGAU  |
| ENSG00000184083 | UUCAAAU  |
| ENSG00000184083 | UUCCAUA  |
| ENSG00000184083 | UUGGCAA  |
| ENSG00000184113 | GGCAGGG  |
| ENSG00000184117 | GAGGU AU |
| ENSG00000184117 | GGCUCAG  |
| ENSG00000184144 | AAAAACC  |
| ENSG00000184144 | AAGAACC  |
| ENSG00000184144 | AGCCCUU  |
| ENSG00000184144 | CACAGUG  |
| ENSG00000184144 | GAGGGGC  |
| ENSG00000184144 | GCAGGAC  |
| ENSG00000184144 | GGCAGUG  |
| ENSG00000184144 | GGGUCUU  |
| ENSG00000184156 | UACAAAG  |
| ENSG00000184160 | UUGGCAC  |

|                 |         |
|-----------------|---------|
| ENSG00000184162 | ACUCAGG |
| ENSG00000184162 | CUCAGGG |
| ENSG00000184162 | GCUUCCU |
| ENSG00000184182 | ACAUUAC |
| ENSG00000184185 | AAAAACC |
| ENSG00000184185 | AAAGAGG |
| ENSG00000184185 | AACAGUC |
| ENSG00000184185 | AAGGCAC |
| ENSG00000184185 | AAGUGCA |
| ENSG00000184185 | ACCAGCA |
| ENSG00000184185 | AGCACCA |
| ENSG00000184185 | AUGCAUU |
| ENSG00000184185 | CACCAGC |
| ENSG00000184185 | CCUGAG  |
| ENSG00000184185 | CUAGUCC |
| ENSG00000184185 | CUGCUCU |
| ENSG00000184185 | GAGUCUU |
| ENSG00000184185 | UCCAGUU |
| ENSG00000184185 | UGAGUCU |
| ENSG00000184185 | UGCAGCU |
| ENSG00000184185 | UUGGUCC |
| ENSG00000184194 | GUCUGCC |
| ENSG00000184203 | AAAAGUA |
| ENSG00000184203 | AAGUCAC |
| ENSG00000184203 | AUACAAG |
| ENSG00000184203 | GAGAAAU |
| ENSG00000184203 | UACAAAG |
| ENSG00000184203 | UCCAUA  |
| ENSG00000184205 | AAAAAUC |
| ENSG00000184205 | AAGUGCA |
| ENSG00000184205 | AGCAGCA |
| ENSG00000184205 | AGUGCAA |
| ENSG00000184205 | CCCCCAG |
| ENSG00000184205 | GGCCUG  |
| ENSG00000184205 | UGCAUAG |
| ENSG00000184216 | AGUGUGC |
| ENSG00000184216 | GAGAACC |
| ENSG00000184216 | GUAGUGU |
| ENSG00000184216 | GUGACUG |
| ENSG00000184216 | UAUUACC |
| ENSG00000184226 | AAGGCAC |
| ENSG00000184226 | ACCUGGA |
| ENSG00000184226 | AGCAGCG |
| ENSG00000184226 | AGCAGCU |
| ENSG00000184226 | AGUAACA |
| ENSG00000184226 | AUGCACC |
| ENSG00000184226 | AUGCCUU |
| ENSG00000184226 | AUUGCAC |
| ENSG00000184226 | CAAAGCA |
| ENSG00000184226 | CAGUCCA |
| ENSG00000184226 | CUUGUGU |
| ENSG00000184226 | GCAACUU |
| ENSG00000184226 | GGCAUUG |
| ENSG00000184226 | UAUUGCU |
| ENSG00000184226 | UCAAGUA |
| ENSG00000184226 | UGGUACC |
| ENSG00000184226 | UUAGAGA |
| ENSG00000184232 | AAGGCAC |
| ENSG00000184232 | CUGCCC  |
| ENSG00000184232 | CUGGAAA |
| ENSG00000184232 | UCAAGUA |
| ENSG00000184232 | UCACAGG |
| ENSG00000184232 | UCACAGU |
| ENSG00000184254 | ACAGUAC |

|                 |          |
|-----------------|----------|
| ENSG00000184254 | ACCACAG  |
| ENSG00000184254 | AGAUAAA  |
| ENSG00000184254 | AGCAUUC  |
| ENSG00000184254 | CCCUGAG  |
| ENSG00000184254 | UAUAAAAG |
| ENSG00000184254 | UUCCAUU  |
| ENSG00000184254 | UUCUAAU  |
| ENSG00000184260 | AAAGAGC  |
| ENSG00000184260 | GGCUCUG  |
| ENSG00000184261 | AAAGCGC  |
| ENSG00000184270 | AAAGAGC  |
| ENSG00000184270 | GGCUCUG  |
| ENSG00000184271 | AAAGUGC  |
| ENSG00000184271 | AAGUGCU  |
| ENSG00000184271 | CAAAGUG  |
| ENSG00000184271 | CUGCCCC  |
| ENSG00000184271 | GAGGCUG  |
| ENSG00000184277 | AAAGUAC  |
| ENSG00000184277 | ACAUUAC  |
| ENSG00000184277 | UCACAGG  |
| ENSG00000184277 | UCACAGU  |
| ENSG00000184292 | UACAAAG  |
| ENSG00000184304 | UCAACAG  |
| ENSG00000184304 | UGCAAAG  |
| ENSG00000184304 | UGUCUUU  |
| ENSG00000184304 | UUCUGCA  |
| ENSG00000184304 | UUGGCAA  |
| ENSG00000184304 | UUGUUCG  |
| ENSG00000184307 | AAAAAUC  |
| ENSG00000184307 | AAAGAAU  |
| ENSG00000184307 | AAAGUUU  |
| ENSG00000184307 | AGUGCAA  |
| ENSG00000184307 | AUACAAG  |
| ENSG00000184307 | AUGGCUU  |
| ENSG00000184307 | GGCAGUG  |
| ENSG00000184307 | GUGCUUG  |
| ENSG00000184307 | UGUGCUU  |
| ENSG00000184343 | AAGGCAC  |
| ENSG00000184347 | AAAAAUC  |
| ENSG00000184347 | CUCUUC   |
| ENSG00000184347 | UUUUUGC  |
| ENSG00000184349 | GGAUGAG  |
| ENSG00000184349 | UGACAUC  |
| ENSG00000184349 | UUGGCAA  |
| ENSG00000184349 | UUGGCAC  |
| ENSG00000184357 | AAAGAGC  |
| ENSG00000184368 | AUGGCAC  |
| ENSG00000184371 | AGGAGCU  |
| ENSG00000184371 | AGUGCAA  |
| ENSG00000184371 | CCUUCAU  |
| ENSG00000184371 | GCUUCCU  |
| ENSG00000184371 | GGCAGGG  |
| ENSG00000184371 | UCACAGG  |
| ENSG00000184371 | UCACAGU  |
| ENSG00000184371 | UCCUGAG  |
| ENSG00000184381 | GUCAGUU  |
| ENSG00000184388 | AAGUCUU  |
| ENSG00000184388 | CUCUGGG  |
| ENSG00000184388 | CUGCAGG  |
| ENSG00000184388 | CUGUUGA  |
| ENSG00000184388 | UUGGCAA  |
| ENSG00000184402 | AAAGUAU  |
| ENSG00000184402 | AAAGUGC  |
| ENSG00000184402 | ACAAUAU  |

|                 |         |
|-----------------|---------|
| ENSG00000184402 | AGUGCUU |
| ENSG00000184402 | CAAAGUG |
| ENSG00000184402 | CACAGUG |
| ENSG00000184402 | CCAGCAU |
| ENSG00000184402 | CUAUACA |
| ENSG00000184402 | CUGGGCA |
| ENSG00000184402 | GAAACAU |
| ENSG00000184402 | GGCAAGA |
| ENSG00000184402 | UCACAGG |
| ENSG00000184402 | UCACAUU |
| ENSG00000184402 | UGUAUAA |
| ENSG00000184402 | UUGGCAA |
| ENSG00000184408 | AAGUGCA |
| ENSG00000184408 | AUGCAUU |
| ENSG00000184408 | AUUGCAC |
| ENSG00000184408 | GAGAAAU |
| ENSG00000184408 | UCCUGAG |
| ENSG00000184408 | UGUGCUU |
| ENSG00000184408 | UUCAAGC |
| ENSG00000184454 | AGCACCA |
| ENSG00000184454 | AGCUGCC |
| ENSG00000184454 | AGUACUG |
| ENSG00000184454 | GACCCUG |
| ENSG00000184454 | GAGUCUU |
| ENSG00000184454 | UAUUACC |
| ENSG00000184454 | UGAAGCU |
| ENSG00000184454 | UGAGUCU |
| ENSG00000184481 | ACUCCAG |
| ENSG00000184481 | ACUGCAU |
| ENSG00000184481 | AGGCAGG |
| ENSG00000184481 | AGGGAGG |
| ENSG00000184481 | CACAGUG |
| ENSG00000184481 | CAGCAGG |
| ENSG00000184481 | CAGGCUC |
| ENSG00000184481 | CCAGUGC |
| ENSG00000184481 | CUAGUAA |
| ENSG00000184481 | CUCCAC  |
| ENSG00000184481 | CUGGGGG |
| ENSG00000184481 | GACUUCC |
| ENSG00000184481 | GAGCCCC |
| ENSG00000184481 | GAGUGUG |
| ENSG00000184481 | GGCCUG  |
| ENSG00000184481 | GGGAACG |
| ENSG00000184481 | GGGUAAG |
| ENSG00000184481 | GUCUCUG |
| ENSG00000184481 | UAAGACU |
| ENSG00000184481 | UAUAAAG |
| ENSG00000184481 | UGAUCCA |
| ENSG00000184481 | UGGCCCU |
| ENSG00000184481 | UGGGGGA |
| ENSG00000184481 | UUGGCAC |
| ENSG00000184481 | UUGUGUC |
| ENSG00000184486 | AGGCAGG |
| ENSG00000184486 | GUGCAAA |
| ENSG00000184486 | UCCUGU  |
| ENSG00000184486 | UUGAGGC |
| ENSG00000184489 | AGUGGUU |
| ENSG00000184489 | UAUUGCU |
| ENSG00000184508 | CACCACC |
| ENSG00000184508 | CUCUUCC |
| ENSG00000184508 | CUUCACC |
| ENSG00000184508 | UCACCAC |
| ENSG00000184508 | UUGUUCG |
| ENSG00000184517 | GGAGAGA |

|                 |          |
|-----------------|----------|
| ENSG00000184545 | AAAGUGC  |
| ENSG00000184545 | AAGUGCA  |
| ENSG00000184545 | AUAAUAC  |
| ENSG00000184545 | AUAUAAC  |
| ENSG00000184545 | AUGGCUU  |
| ENSG00000184545 | AUGUAAU  |
| ENSG00000184545 | GGCUCAG  |
| ENSG00000184545 | UAUUACC  |
| ENSG00000184545 | UAUUGCU  |
| ENSG00000184545 | UGCCAGC  |
| ENSG00000184557 | ACAUUCA  |
| ENSG00000184557 | AGUGCUG  |
| ENSG00000184557 | AGUGCUU  |
| ENSG00000184557 | CAGUGCA  |
| ENSG00000184557 | GAUCAGA  |
| ENSG00000184557 | GAUUGUA  |
| ENSG00000184557 | GUGCCAC  |
| ENSG00000184557 | UGGGACA  |
| ENSG00000184557 | UGUGCUU  |
| ENSG00000184557 | UUCAAGC  |
| ENSG00000184557 | UUGAGGC  |
| ENSG00000184560 | CUGGACU  |
| ENSG00000184564 | AGCAGCA  |
| ENSG00000184564 | AUGGCUU  |
| ENSG00000184564 | UGUGCUU  |
| ENSG00000184571 | GUCAGUU  |
| ENSG00000184574 | GGAAGCC  |
| ENSG00000184575 | AUGGCAC  |
| ENSG00000184575 | GCAACUU  |
| ENSG00000184584 | GGCUCAG  |
| ENSG00000184588 | AAGGCAC  |
| ENSG00000184588 | ACAAUAU  |
| ENSG00000184588 | AGUAGUU  |
| ENSG00000184588 | AGUGCAA  |
| ENSG00000184588 | CACCACC  |
| ENSG00000184588 | CAGUAGA  |
| ENSG00000184588 | CAGUAGU  |
| ENSG00000184588 | CAGUGCA  |
| ENSG00000184588 | GAGAAAU  |
| ENSG00000184588 | GGAAGAC  |
| ENSG00000184588 | GGCAGUG  |
| ENSG00000184588 | UAUAAAAG |
| ENSG00000184588 | UCAAGUA  |
| ENSG00000184602 | AAAGCGC  |
| ENSG00000184602 | AACAAAC  |
| ENSG00000184602 | AAGCGCU  |
| ENSG00000184602 | AAUUUUA  |
| ENSG00000184602 | ACAGUAC  |
| ENSG00000184602 | ACAGUAU  |
| ENSG00000184602 | ACAUUCA  |
| ENSG00000184602 | AGCAAAA  |
| ENSG00000184602 | AGUAACA  |
| ENSG00000184602 | CACAGGG  |
| ENSG00000184602 | CAGUAGU  |
| ENSG00000184602 | CCAGUGC  |
| ENSG00000184602 | CCAGUGU  |
| ENSG00000184602 | GAGGUAG  |
| ENSG00000184602 | GCAGAAG  |
| ENSG00000184602 | GGCAAGA  |
| ENSG00000184602 | UAUUGCU  |
| ENSG00000184602 | UCACAGU  |
| ENSG00000184602 | UGCCAGC  |
| ENSG00000184611 | ACAGUAU  |
| ENSG00000184611 | CCCUGAG  |

|                 |         |
|-----------------|---------|
| ENSG00000184611 | GAAAACA |
| ENSG00000184611 | GGCAGUG |
| ENSG00000184611 | UCAAGUA |
| ENSG00000184611 | UGCAUAG |
| ENSG00000184611 | UUUGCAA |
| ENSG00000184611 | UUUGCAC |
| ENSG00000184613 | GAGAAAU |
| ENSG00000184634 | AAAAACC |
| ENSG00000184634 | AAAAAUC |
| ENSG00000184634 | AACAAAC |
| ENSG00000184634 | UUUGCAA |
| ENSG00000184640 | AAGGCAC |
| ENSG00000184640 | AGCAAAA |
| ENSG00000184640 | AUACAAG |
| ENSG00000184640 | CAGACAG |
| ENSG00000184640 | CAGGAAC |
| ENSG00000184640 | CUUGGGC |
| ENSG00000184640 | GAAGGAA |
| ENSG00000184640 | GGAGGCA |
| ENSG00000184640 | UUCAAAU |
| ENSG00000184640 | UUGGCAC |
| ENSG00000184672 | AAAAAUC |
| ENSG00000184672 | UACAAAG |
| ENSG00000184672 | UCACAGU |
| ENSG00000184672 | UGUAUAA |
| ENSG00000184672 | UUCUAAU |
| ENSG00000184675 | AGAUAAA |
| ENSG00000184675 | AGGAGCU |
| ENSG00000184675 | AGUGGUU |
| ENSG00000184675 | CACUGUU |
| ENSG00000184675 | CAUGGGU |
| ENSG00000184675 | CUGCCCC |
| ENSG00000184675 | CUUUGGU |
| ENSG00000184675 | GAGAAAU |
| ENSG00000184675 | GAGGCUG |
| ENSG00000184675 | GCAUCC  |
| ENSG00000184675 | GCUUCCU |
| ENSG00000184675 | GGAUUUU |
| ENSG00000184675 | GGGUAAG |
| ENSG00000184675 | GUAAACA |
| ENSG00000184675 | GUGCUUG |
| ENSG00000184675 | UCACAAG |
| ENSG00000184675 | UCCUGAG |
| ENSG00000184675 | UCCUUGC |
| ENSG00000184675 | UGAAGUG |
| ENSG00000184675 | UGGAGAU |
| ENSG00000184675 | UUCUGCA |
| ENSG00000184675 | UUGGAGG |
| ENSG00000184675 | UUUCAAC |
| ENSG00000184677 | AAGUCUU |
| ENSG00000184677 | AAUUAUU |
| ENSG00000184677 | AAUUGCU |
| ENSG00000184677 | AGAUAAA |
| ENSG00000184677 | AGCACCA |
| ENSG00000184677 | AUGGAUU |
| ENSG00000184677 | AUUGCAC |
| ENSG00000184677 | CAAGAGC |
| ENSG00000184677 | CAGGAAC |
| ENSG00000184677 | CUUGGGC |
| ENSG00000184677 | GCACCAU |
| ENSG00000184677 | GUAAACA |
| ENSG00000184677 | GUGGGGA |
| ENSG00000184677 | UCAUUUG |
| ENSG00000184677 | UUAGGAU |

|                 |         |
|-----------------|---------|
| ENSG00000184677 | UCCAUA  |
| ENSG00000184677 | UUGCAA  |
| ENSG00000184677 | UUGCAC  |
| ENSG00000184678 | AAAGAGC |
| ENSG00000184678 | GGCAGGG |
| ENSG00000184678 | GGGUGGU |
| ENSG00000184702 | GCGGGUG |
| ENSG00000184743 | AAAGCUG |
| ENSG00000184743 | AAGGCAC |
| ENSG00000184743 | AAGUGCA |
| ENSG00000184787 | AAAAAUC |
| ENSG00000184787 | AAGGCAC |
| ENSG00000184787 | ACCAGCA |
| ENSG00000184787 | GAGGUAG |
| ENSG00000184787 | UAUUGCU |
| ENSG00000184787 | UUCUGCA |
| ENSG00000184788 | UGCCAGC |
| ENSG00000184792 | AAAAAUC |
| ENSG00000184792 | AAGGCAC |
| ENSG00000184792 | ACUUGGA |
| ENSG00000184792 | CACCAGC |
| ENSG00000184792 | CAGACAG |
| ENSG00000184792 | CUGGAAA |
| ENSG00000184792 | UAUUGCU |
| ENSG00000184792 | UGCUGAC |
| ENSG00000184811 | GGCAGUG |
| ENSG00000184811 | GUUCAUG |
| ENSG00000184811 | UCCAGAG |
| ENSG00000184811 | UCCAUA  |
| ENSG00000184825 | AAAGAGC |
| ENSG00000184828 | AAGGCAC |
| ENSG00000184828 | CUUCUCU |
| ENSG00000184838 | AAGUGCU |
| ENSG00000184838 | UUAUGCA |
| ENSG00000184840 | AGUAACA |
| ENSG00000184840 | CCCCAG  |
| ENSG00000184840 | CCUGAG  |
| ENSG00000184840 | GGAAGAC |
| ENSG00000184840 | GUAACAG |
| ENSG00000184840 | UCCACA  |
| ENSG00000184845 | AAGUGCU |
| ENSG00000184845 | AGCACCA |
| ENSG00000184845 | AUAAAGU |
| ENSG00000184863 | AAGACAU |
| ENSG00000184863 | AAGGCAC |
| ENSG00000184863 | AAUCCUU |
| ENSG00000184863 | ACACACC |
| ENSG00000184863 | ACACACU |
| ENSG00000184863 | AGUGCAA |
| ENSG00000184863 | AUAAUAC |
| ENSG00000184863 | AUGCAUU |
| ENSG00000184863 | CACUGUU |
| ENSG00000184863 | CCAUUAC |
| ENSG00000184863 | CUUCACC |
| ENSG00000184863 | GCCCUUA |
| ENSG00000184863 | GGAGAGA |
| ENSG00000184863 | UAAUACA |
| ENSG00000184863 | UAAUAUC |
| ENSG00000184863 | UAUAAAG |
| ENSG00000184863 | UGCAAAG |
| ENSG00000184863 | UGCAUUG |
| ENSG00000184863 | UGGAGAU |
| ENSG00000184863 | UUAGGAU |
| ENSG00000184863 | UUGGAGG |



|                 |          |
|-----------------|----------|
| ENSG00000184867 | AAAUGGU  |
| ENSG00000184867 | ACAUCAC  |
| ENSG00000184886 | AAAGUAA  |
| ENSG00000184897 | CGUCGCC  |
| ENSG00000184897 | UUCAAAU  |
| ENSG00000184900 | ACAGUAC  |
| ENSG00000184900 | ACAGUAU  |
| ENSG00000184900 | UGGCCCU  |
| ENSG00000184916 | AAAGAAU  |
| ENSG00000184916 | AAGGCAC  |
| ENSG00000184916 | AAUACUG  |
| ENSG00000184916 | GUAAACA  |
| ENSG00000184916 | UAAUAUC  |
| ENSG00000184939 | CUUUGGU  |
| ENSG00000184939 | UUAGGAU  |
| ENSG00000184979 | UAUAAAG  |
| ENSG00000184983 | ACAGGUG  |
| ENSG00000184986 | GAGAUGA  |
| ENSG00000184988 | GCCUGGA  |
| ENSG00000184990 | AUAAAAGU |
| ENSG00000184990 | UAUAAAG  |
| ENSG00000184992 | UACAAAG  |
| ENSG00000185000 | CCCUGAG  |
| ENSG00000185000 | GGGGCAG  |
| ENSG00000185008 | AAGGUGC  |
| ENSG00000185008 | ACAGUAU  |
| ENSG00000185008 | ACAUUCA  |
| ENSG00000185008 | ACCACAG  |
| ENSG00000185008 | AGCAGCU  |
| ENSG00000185008 | GAGAAGA  |
| ENSG00000185008 | GAUAUGU  |
| ENSG00000185008 | GUGCAAA  |
| ENSG00000185008 | GUGCUUG  |
| ENSG00000185008 | GUUCAUG  |
| ENSG00000185008 | UGCAUUG  |
| ENSG00000185008 | UGUGUGG  |
| ENSG00000185009 | AACAAAC  |
| ENSG00000185009 | AAGGCAC  |
| ENSG00000185009 | ACAAUAU  |
| ENSG00000185009 | ACUGCAG  |
| ENSG00000185009 | ACUGCAU  |
| ENSG00000185009 | ACUGGAU  |
| ENSG00000185009 | ACUGUGU  |
| ENSG00000185009 | AGCACCA  |
| ENSG00000185009 | AGCUUAU  |
| ENSG00000185009 | AGGUUAU  |
| ENSG00000185009 | AGUGCUU  |
| ENSG00000185009 | AUGGCAC  |
| ENSG00000185009 | CUACAGU  |
| ENSG00000185009 | CUGCAGC  |
| ENSG00000185009 | GAAAACA  |
| ENSG00000185009 | GAGAUGA  |
| ENSG00000185009 | GAUCAGA  |
| ENSG00000185009 | GCAGCAU  |
| ENSG00000185009 | GCUACAU  |
| ENSG00000185009 | GUAAACA  |
| ENSG00000185009 | UCCCACA  |
| ENSG00000185009 | UCCCACC  |
| ENSG00000185009 | UCCCUGU  |
| ENSG00000185009 | UCCCUUG  |
| ENSG00000185009 | UGAGAAU  |
| ENSG00000185009 | UUGAUCA  |
| ENSG00000185009 | UUGGCAA  |
| ENSG00000185009 | UUGGCAC  |

|                 |          |
|-----------------|----------|
| ENSG00000185010 | GCUUCCU  |
| ENSG00000185015 | UAAUGCU  |
| ENSG00000185015 | UAUAUGA  |
| ENSG00000185019 | AUGGCUU  |
| ENSG00000185019 | CAGCAGG  |
| ENSG00000185019 | CUGGCUC  |
| ENSG00000185019 | GCCUGGG  |
| ENSG00000185019 | GUGCCUG  |
| ENSG00000185022 | AGAUAAA  |
| ENSG00000185022 | AUAAAAGU |
| ENSG00000185022 | UAUAAAAG |
| ENSG00000185033 | CCCUGAG  |
| ENSG00000185033 | CUGGGCA  |
| ENSG00000185033 | GCCUGAU  |
| ENSG00000185033 | GGCAGUG  |
| ENSG00000185046 | AAGGCAC  |
| ENSG00000185046 | CACAAUG  |
| ENSG00000185046 | UAUUACC  |
| ENSG00000185049 | GAGAAAU  |
| ENSG00000185052 | AAAGUAC  |
| ENSG00000185052 | AAAGUAU  |
| ENSG00000185052 | AAUCUCA  |
| ENSG00000185052 | ACAUUCA  |
| ENSG00000185052 | AGCAGCA  |
| ENSG00000185052 | AGCAGCG  |
| ENSG00000185052 | AGCAGCU  |
| ENSG00000185052 | AGUGAUC  |
| ENSG00000185052 | AGUGCAA  |
| ENSG00000185052 | AGUGCUU  |
| ENSG00000185052 | CACAAUG  |
| ENSG00000185052 | CCAGUGC  |
| ENSG00000185052 | CUGGCUC  |
| ENSG00000185052 | GAUCAGA  |
| ENSG00000185052 | GCCUGGA  |
| ENSG00000185052 | GCCUGGG  |
| ENSG00000185052 | GGCAAGA  |
| ENSG00000185052 | GGCUCAG  |
| ENSG00000185052 | UAUUGCU  |
| ENSG00000185052 | UCACAAG  |
| ENSG00000185053 | AAGGCAC  |
| ENSG00000185070 | AAAGAAU  |
| ENSG00000185070 | AAAGUAC  |
| ENSG00000185070 | AACAUUC  |
| ENSG00000185070 | AAGUGUG  |
| ENSG00000185070 | AAUCACU  |
| ENSG00000185070 | ACAGUUA  |
| ENSG00000185070 | ACUGUAG  |
| ENSG00000185070 | AGCCCUU  |
| ENSG00000185070 | AGUGGUU  |
| ENSG00000185070 | AUAAAAGU |
| ENSG00000185070 | CACAGUG  |
| ENSG00000185070 | CCUGUAC  |
| ENSG00000185070 | GUAACAG  |
| ENSG00000185070 | UAUAAAAG |
| ENSG00000185070 | UCACAGU  |
| ENSG00000185070 | UGCAUAG  |
| ENSG00000185070 | UGCAUUA  |
| ENSG00000185070 | UGUGCUU  |
| ENSG00000185085 | AAUUUUA  |
| ENSG00000185088 | AAAACUG  |
| ENSG00000185088 | UACAAAG  |
| ENSG00000185090 | ACAAGGU  |
| ENSG00000185090 | CACAGUG  |
| ENSG00000185090 | GAGGUUA  |

|                 |         |
|-----------------|---------|
| ENSG00000185090 | UCACAGU |
| ENSG00000185112 | AACAAAC |
| ENSG00000185112 | AGCAAAA |
| ENSG00000185112 | CAGCAAA |
| ENSG00000185112 | GAGGUAG |
| ENSG00000185112 | GAGGUAU |
| ENSG00000185112 | UCACAAG |
| ENSG00000185112 | UUGGCAC |
| ENSG00000185112 | UUUGCAA |
| ENSG00000185122 | CAGUCCA |
| ENSG00000185127 | CAAAACU |
| ENSG00000185127 | CAGCAAA |
| ENSG00000185127 | UCACAGG |
| ENSG00000185127 | UCACAGU |
| ENSG00000185127 | UGUGCUU |
| ENSG00000185129 | AACAAAC |
| ENSG00000185129 | AACAUUC |
| ENSG00000185129 | AAUGUUG |
| ENSG00000185129 | AGCAGCG |
| ENSG00000185129 | AGCCCUU |
| ENSG00000185129 | CAAUUGC |
| ENSG00000185129 | CACAGGG |
| ENSG00000185129 | CAGACAG |
| ENSG00000185129 | CAGCAAA |
| ENSG00000185129 | CUACAAA |
| ENSG00000185129 | CUUUGGU |
| ENSG00000185129 | GUCAGUU |
| ENSG00000185129 | GUCCAGA |
| ENSG00000185129 | UAUUACC |
| ENSG00000185129 | UCAAGUA |
| ENSG00000185129 | UGCAAAG |
| ENSG00000185129 | UGCAUUA |
| ENSG00000185129 | UGUGCUU |
| ENSG00000185129 | UUCUGCA |
| ENSG00000185149 | CAGCAGA |
| ENSG00000185164 | UCUCACC |
| ENSG00000185219 | AUGCAUU |
| ENSG00000185219 | CAGCAGG |
| ENSG00000185219 | CCAGGAG |
| ENSG00000185219 | CUGGCUC |
| ENSG00000185219 | CUUCUCU |
| ENSG00000185250 | CUGGGCA |
| ENSG00000185250 | GCAACUU |
| ENSG00000185250 | GGCUCAG |
| ENSG00000185250 | UUGGCAA |
| ENSG00000185262 | CCAGUGU |
| ENSG00000185262 | CUCCAGC |
| ENSG00000185262 | UAUAAAG |
| ENSG00000185262 | UCCAGUU |
| ENSG00000185269 | ACAAUUA |
| ENSG00000185269 | AGUGCUU |
| ENSG00000185269 | CCAGUGU |
| ENSG00000185269 | UACAAAG |
| ENSG00000185269 | UAUAAAG |
| ENSG00000185272 | CUUUGGU |
| ENSG00000185274 | AACUCUA |
| ENSG00000185274 | AUAUUAU |
| ENSG00000185274 | CUGGGCA |
| ENSG00000185274 | GCUGUCU |
| ENSG00000185274 | GGCAGGG |
| ENSG00000185278 | CCCUGAG |
| ENSG00000185305 | AAUUAUU |
| ENSG00000185305 | AGUGGUU |
| ENSG00000185305 | CAGUAGA |

|                 |        |
|-----------------|--------|
| ENSG00000185305 | CUGCUC |
| ENSG00000185305 | GAGAUG |
| ENSG00000185305 | GUAACA |
| ENSG00000185305 | GUAGUG |
| ENSG00000185305 | UUAUGC |
| ENSG00000185332 | CUGCAG |
| ENSG00000185332 | UGUGUG |
| ENSG00000185338 | CAGCAG |
| ENSG00000185338 | CCCCUG |
| ENSG00000185338 | CUCCAG |
| ENSG00000185338 | GCUACA |
| ENSG00000185338 | GUUAAU |
| ENSG00000185338 | UAAUGC |
| ENSG00000185338 | UACAGU |
| ENSG00000185338 | UGCAA  |
| ENSG00000185338 | UUCUGC |
| ENSG00000185340 | AAGGC  |
| ENSG00000185340 | GGAAUG |
| ENSG00000185344 | AAGGC  |
| ENSG00000185344 | AAUUUU |
| ENSG00000185344 | AUUUUU |
| ENSG00000185344 | GAGGUA |
| ENSG00000185344 | GGCUC  |
| ENSG00000185344 | UGCUC  |
| ENSG00000185345 | UCUC   |
| ENSG00000185352 | AUUUUU |
| ENSG00000185352 | CACAAU |
| ENSG00000185352 | CUUGGC |
| ENSG00000185352 | GAUCAG |
| ENSG00000185352 | GUGCUU |
| ENSG00000185352 | UCUCA  |
| ENSG00000185352 | UUCAAU |
| ENSG00000185386 | GAGGUA |
| ENSG00000185414 | GGAUUC |
| ENSG00000185418 | AAUUUC |
| ENSG00000185432 | AAAGUA |
| ENSG00000185432 | UCCUUU |
| ENSG00000185436 | AAAAAU |
| ENSG00000185442 | GAAGGU |
| ENSG00000185477 | AUUUUU |
| ENSG00000185477 | UCUGG  |
| ENSG00000185477 | UGAGUC |
| ENSG00000185477 | UUGAGG |
| ENSG00000185477 | UUGUGC |
| ENSG00000185477 | UUUUUG |
| ENSG00000185483 | UUCUGC |
| ENSG00000185499 | CACCAG |
| ENSG00000185504 | AGCAC  |
| ENSG00000185504 | CACAGU |
| ENSG00000185515 | GUGCUU |
| ENSG00000185515 | UUUGCA |
| ENSG00000185518 | AAAACU |
| ENSG00000185518 | AAAGUG |
| ENSG00000185518 | AAAUGG |
| ENSG00000185518 | AUGGCU |
| ENSG00000185518 | GCCCUA |
| ENSG00000185518 | UGCUC  |
| ENSG00000185518 | UGUGCU |
| ENSG00000185519 | CCCACU |
| ENSG00000185532 | AAAGCU |
| ENSG00000185532 | AAUGCC |
| ENSG00000185532 | ACAUUC |
| ENSG00000185532 | ACUGAU |
| ENSG00000185532 | AGCAC  |

|                 |         |
|-----------------|---------|
| ENSG00000185532 | AGCAGCA |
| ENSG00000185532 | CAGCAA  |
| ENSG00000185532 | GAGAAAU |
| ENSG00000185532 | GCAGCAU |
| ENSG00000185532 | GCUGUCU |
| ENSG00000185532 | GGCAGCG |
| ENSG00000185532 | GUGCUUG |
| ENSG00000185551 | AACUCUA |
| ENSG00000185551 | AACUGGU |
| ENSG00000185551 | AAGUUGU |
| ENSG00000185551 | AAUGUUG |
| ENSG00000185551 | ACAGUAC |
| ENSG00000185551 | ACAUAGA |
| ENSG00000185551 | AUAUAAC |
| ENSG00000185551 | AUGCAUU |
| ENSG00000185551 | CACAGUG |
| ENSG00000185551 | CAGUAC  |
| ENSG00000185551 | GUAAACA |
| ENSG00000185551 | GUAACAG |
| ENSG00000185551 | UACAGUU |
| ENSG00000185551 | UCACAGG |
| ENSG00000185551 | UCCUAUA |
| ENSG00000185551 | UGCAAAG |
| ENSG00000185567 | AGCAGCA |
| ENSG00000185585 | AGCUGCC |
| ENSG00000185585 | CAGCUGG |
| ENSG00000185585 | CUCACAC |
| ENSG00000185585 | GACCCUG |
| ENSG00000185585 | GAGUGUG |
| ENSG00000185585 | GCAGGAC |
| ENSG00000185585 | GCAGGUU |
| ENSG00000185585 | GCCUGAU |
| ENSG00000185585 | GGAAUGU |
| ENSG00000185585 | GGGGUGG |
| ENSG00000185585 | UACAAAG |
| ENSG00000185585 | UCUGGAA |
| ENSG00000185591 | AAAGCUG |
| ENSG00000185591 | AAAUUUC |
| ENSG00000185591 | AAGACAU |
| ENSG00000185591 | AAUACUG |
| ENSG00000185591 | AAUCUCA |
| ENSG00000185591 | AAUUUUA |
| ENSG00000185591 | ACACACC |
| ENSG00000185591 | ACACACU |
| ENSG00000185591 | ACAUUCA |
| ENSG00000185591 | ACCAGCA |
| ENSG00000185591 | ACUGGCU |
| ENSG00000185591 | AGCACCA |
| ENSG00000185591 | AGCUGCC |
| ENSG00000185591 | AGUAGAC |
| ENSG00000185591 | AGUGCAA |
| ENSG00000185591 | AGUGCCU |
| ENSG00000185591 | AGUGCUG |
| ENSG00000185591 | AGUGCUU |
| ENSG00000185591 | AUACAAG |
| ENSG00000185591 | AUCCUUG |
| ENSG00000185591 | AUGGCUU |
| ENSG00000185591 | AUUGCAC |
| ENSG00000185591 | CAAAGCA |
| ENSG00000185591 | CAGCAGA |
| ENSG00000185591 | CAGCAGG |
| ENSG00000185591 | CAGUAGA |
| ENSG00000185591 | CAGUAGU |
| ENSG00000185591 | CAGUCUG |

|                 |         |
|-----------------|---------|
| ENSG00000185591 | CAGUGCA |
| ENSG00000185591 | CCAGUAC |
| ENSG00000185591 | CCAGUGU |
| ENSG00000185591 | CUCCAGC |
| ENSG00000185591 | CUGCAGC |
| ENSG00000185591 | CUGCAGG |
| ENSG00000185591 | CUGGCUC |
| ENSG00000185591 | CUGGGCA |
| ENSG00000185591 | CUUGGAG |
| ENSG00000185591 | GAAGGAA |
| ENSG00000185591 | GAGGCAG |
| ENSG00000185591 | GCAGGUU |
| ENSG00000185591 | GCAUCC  |
| ENSG00000185591 | GCCUGAU |
| ENSG00000185591 | GCUUCCU |
| ENSG00000185591 | GGAAGCC |
| ENSG00000185591 | GGAAUGU |
| ENSG00000185591 | GGCUCAG |
| ENSG00000185591 | GGCUCUG |
| ENSG00000185591 | GGGGCAG |
| ENSG00000185591 | GGGUAAG |
| ENSG00000185591 | GGUGGGC |
| ENSG00000185591 | GUCAGUU |
| ENSG00000185591 | GUCUCUG |
| ENSG00000185591 | GUGAAUG |
| ENSG00000185591 | GUGCCUG |
| ENSG00000185591 | GUGCUUG |
| ENSG00000185591 | UAUCAGA |
| ENSG00000185591 | UAUUGCU |
| ENSG00000185591 | UCACACA |
| ENSG00000185591 | UCACAGU |
| ENSG00000185591 | UCAUACA |
| ENSG00000185591 | UCAUAGA |
| ENSG00000185591 | UCCAGUU |
| ENSG00000185591 | UCCCUGU |
| ENSG00000185591 | UCCCUUG |
| ENSG00000185591 | UCCCUUU |
| ENSG00000185591 | UCCUGAG |
| ENSG00000185591 | UGAAAGG |
| ENSG00000185591 | UGAAAUG |
| ENSG00000185591 | UGAGGAC |
| ENSG00000185591 | UGCAGCU |
| ENSG00000185591 | UGGUACC |
| ENSG00000185591 | UGUGCUU |
| ENSG00000185591 | UGUGUCA |
| ENSG00000185591 | UUAGGAU |
| ENSG00000185591 | UUCGGC  |
| ENSG00000185591 | UUGAUCU |
| ENSG00000185591 | UUGGUCC |
| ENSG00000185591 | UUGUUCG |
| ENSG00000185610 | GCUGGAU |
| ENSG00000185619 | AAAGCUG |
| ENSG00000185619 | AACAGUC |
| ENSG00000185619 | AAUCCUU |
| ENSG00000185619 | ACACACU |
| ENSG00000185619 | ACCUGGA |
| ENSG00000185619 | ACUCAA  |
| ENSG00000185619 | AGCACCA |
| ENSG00000185619 | AGCAUUC |
| ENSG00000185619 | AUAAUAC |
| ENSG00000185619 | AUACAAG |
| ENSG00000185619 | AUCAUAC |
| ENSG00000185619 | AUGCCUU |
| ENSG00000185619 | AUUGCAC |

|                 |         |
|-----------------|---------|
| ENSG00000185619 | CAAAACU |
| ENSG00000185619 | CAAAGCA |
| ENSG00000185619 | CACAAUG |
| ENSG00000185619 | CACAGUG |
| ENSG00000185619 | CAGCAGA |
| ENSG00000185619 | CAGCAGG |
| ENSG00000185619 | CUACAAA |
| ENSG00000185619 | GACCUGG |
| ENSG00000185619 | GAGGUAG |
| ENSG00000185619 | GAGGUAU |
| ENSG00000185619 | GCACCAU |
| ENSG00000185619 | GCUACAU |
| ENSG00000185619 | GCUGGAU |
| ENSG00000185619 | GCUGGUG |
| ENSG00000185619 | GGUAGAC |
| ENSG00000185619 | GUAAACA |
| ENSG00000185619 | GUAGUGU |
| ENSG00000185619 | GUCUUGC |
| ENSG00000185619 | UAUAAUA |
| ENSG00000185619 | UAUAUGA |
| ENSG00000185619 | UAUUACC |
| ENSG00000185619 | UCACAGG |
| ENSG00000185619 | UCACAGU |
| ENSG00000185619 | UCCCUUU |
| ENSG00000185619 | UCCUGAG |
| ENSG00000185619 | UGCAAAG |
| ENSG00000185619 | UUGGAGG |
| ENSG00000185621 | UCCAUA  |
| ENSG00000185624 | AAAAGUA |
| ENSG00000185624 | AAAGUAC |
| ENSG00000185624 | ACAUCAC |
| ENSG00000185624 | AUCCCUU |
| ENSG00000185624 | UCCUGU  |
| ENSG00000185630 | GGAGGCA |
| ENSG00000185633 | ACGCUCA |
| ENSG00000185633 | AGGGAGG |
| ENSG00000185633 | CUUGGGC |
| ENSG00000185633 | GGGGAGC |
| ENSG00000185633 | UGAUCCA |
| ENSG00000185633 | UUGAUCA |
| ENSG00000185634 | AAAUGGU |
| ENSG00000185634 | AAGGCAC |
| ENSG00000185634 | AUAAAGU |
| ENSG00000185634 | CAAAGCA |
| ENSG00000185634 | CUGCUCU |
| ENSG00000185634 | GUGCUUG |
| ENSG00000185634 | UCAAGUA |
| ENSG00000185634 | UGACAUC |
| ENSG00000185634 | UUGGCAC |
| ENSG00000185650 | AAAGAAU |
| ENSG00000185650 | AAAGCUG |
| ENSG00000185650 | AAGGCAC |
| ENSG00000185650 | AUAUUUA |
| ENSG00000185650 | CUAUACA |
| ENSG00000185650 | GGCAAGA |
| ENSG00000185650 | GGGUUUA |
| ENSG00000185650 | UAAUAUC |
| ENSG00000185650 | UCUAGAG |
| ENSG00000185650 | UCUCCAA |
| ENSG00000185650 | UGCAUUG |
| ENSG00000185650 | UGUAUGU |
| ENSG00000185651 | AAAACUG |
| ENSG00000185651 | AAAUGGU |
| ENSG00000185651 | AAGACAU |

|                 |          |
|-----------------|----------|
| ENSG00000185651 | ACAAUUAU |
| ENSG00000185651 | ACAGGUG  |
| ENSG00000185651 | ACUGUAG  |
| ENSG00000185651 | AGUAACA  |
| ENSG00000185651 | AUCCUUU  |
| ENSG00000185651 | CAAAACU  |
| ENSG00000185651 | CAGCAGA  |
| ENSG00000185651 | CCCUGAG  |
| ENSG00000185651 | CCUGCUG  |
| ENSG00000185651 | CUAGUCC  |
| ENSG00000185651 | CUCACAC  |
| ENSG00000185651 | CUGCUCA  |
| ENSG00000185651 | GCGGGGC  |
| ENSG00000185651 | GCUUCCU  |
| ENSG00000185651 | GGCAUUG  |
| ENSG00000185651 | GUCUCUG  |
| ENSG00000185651 | UCCCACA  |
| ENSG00000185651 | UGAAGCU  |
| ENSG00000185651 | UUCAAAU  |
| ENSG00000185651 | UUGGCAA  |
| ENSG00000185651 | UUGGCAC  |
| ENSG00000185652 | AUAAUAC  |
| ENSG00000185652 | AUAU AAC |
| ENSG00000185652 | AUCAUAC  |
| ENSG00000185652 | UGCAUUAU |
| ENSG00000185658 | AAAAGUA  |
| ENSG00000185658 | AAAGUAC  |
| ENSG00000185658 | AAAGUAU  |
| ENSG00000185658 | AACACUG  |
| ENSG00000185658 | AAGUAGC  |
| ENSG00000185658 | AAGUGCA  |
| ENSG00000185658 | AAUACUG  |
| ENSG00000185658 | ACACACU  |
| ENSG00000185658 | AGCACCA  |
| ENSG00000185658 | AGCCCUU  |
| ENSG00000185658 | AGUGCUG  |
| ENSG00000185658 | AGUGCUU  |
| ENSG00000185658 | CCCUGAG  |
| ENSG00000185658 | CCUGUAC  |
| ENSG00000185658 | CUUGGAG  |
| ENSG00000185658 | GAGUGUG  |
| ENSG00000185658 | GCACCAU  |
| ENSG00000185658 | GCCCUGU  |
| ENSG00000185658 | GCUACAU  |
| ENSG00000185658 | GGAAGAC  |
| ENSG00000185658 | GGAGUGU  |
| ENSG00000185658 | GGAUUUC  |
| ENSG00000185658 | GUCAGUU  |
| ENSG00000185658 | GUGCAAA  |
| ENSG00000185658 | GUGUCAC  |
| ENSG00000185658 | UAAUGCU  |
| ENSG00000185658 | UCACAGG  |
| ENSG00000185658 | UCACCAC  |
| ENSG00000185658 | UCCCUGU  |
| ENSG00000185658 | UGUGUCA  |
| ENSG00000185658 | UUGGCAA  |
| ENSG00000185658 | UUGGUUC  |
| ENSG00000185658 | UUUGCAC  |
| ENSG00000185666 | CUCCAUU  |
| ENSG00000185666 | GAGGCAG  |
| ENSG00000185666 | UAUUGCU  |
| ENSG00000185668 | AAAGUUU  |
| ENSG00000185668 | ACAGUAC  |
| ENSG00000185668 | ACAGUAU  |



|                 |         |
|-----------------|---------|
| ENSG00000185668 | AUAAAGU |
| ENSG00000185668 | CCCACCU |
| ENSG00000185668 | CUCACAC |
| ENSG00000185668 | CUCAGGG |
| ENSG00000185668 | GAGUUGG |
| ENSG00000185668 | UAUAAAG |
| ENSG00000185670 | CUGGCUC |
| ENSG00000185670 | CUUGGAG |
| ENSG00000185697 | AAGUGCU |
| ENSG00000185697 | AGCAGCG |
| ENSG00000185697 | AGCAGCU |
| ENSG00000185697 | CAGUGCA |
| ENSG00000185697 | CUACAGU |
| ENSG00000185697 | GAGAACU |
| ENSG00000185697 | GGAGAGA |
| ENSG00000185697 | GUGCAAA |
| ENSG00000185722 | AAAGCUG |
| ENSG00000185722 | AAGGCAC |
| ENSG00000185722 | AAGUCUU |
| ENSG00000185722 | AAUUUUA |
| ENSG00000185722 | ACAUUCA |
| ENSG00000185722 | ACCCUGU |
| ENSG00000185722 | ACUGGCC |
| ENSG00000185722 | AGCAGCU |
| ENSG00000185722 | AGUGGUU |
| ENSG00000185722 | CCCUGUU |
| ENSG00000185722 | GAAUUGU |
| ENSG00000185722 | GAGGUAG |
| ENSG00000185722 | GAGGUAU |
| ENSG00000185722 | GCAGCAU |
| ENSG00000185722 | GCUGGUG |
| ENSG00000185722 | GGAAGAC |
| ENSG00000185722 | GGAGAGA |
| ENSG00000185722 | GGCAAGA |
| ENSG00000185722 | GGCUCUG |
| ENSG00000185722 | GUCAGUU |
| ENSG00000185722 | GUGCCUG |
| ENSG00000185722 | UAGAGGA |
| ENSG00000185722 | UCCCUUU |
| ENSG00000185728 | AAAGUUU |
| ENSG00000185728 | AACUGGU |
| ENSG00000185728 | AAGUGCU |
| ENSG00000185728 | AAGUGUG |
| ENSG00000185728 | AAUCCUU |
| ENSG00000185728 | AAUUUUA |
| ENSG00000185728 | ACAGUAU |
| ENSG00000185728 | ACUCCAG |
| ENSG00000185728 | AGGAUGU |
| ENSG00000185728 | AGUGCUU |
| ENSG00000185728 | AUCCUUG |
| ENSG00000185728 | CAGCAGA |
| ENSG00000185728 | CAUGGAU |
| ENSG00000185728 | CCAUUAC |
| ENSG00000185728 | GAGGUAG |
| ENSG00000185728 | GAGGUAU |
| ENSG00000185728 | GUGCCUG |
| ENSG00000185728 | UACAAAG |
| ENSG00000185728 | UCAAGUA |
| ENSG00000185728 | UCAUGAU |
| ENSG00000185728 | UCCUUGC |
| ENSG00000185728 | UGAAGCU |
| ENSG00000185728 | UGCAUUA |
| ENSG00000185728 | UGCAUUG |
| ENSG00000185739 | AAGACAU |

|                 |          |
|-----------------|----------|
| ENSG00000185739 | AGCCCUU  |
| ENSG00000185739 | CACAGUG  |
| ENSG00000185739 | CCAGUGU  |
| ENSG00000185739 | CUGACUC  |
| ENSG00000185739 | GAGCCCU  |
| ENSG00000185739 | GGCUCAG  |
| ENSG00000185739 | GUGUGGC  |
| ENSG00000185739 | UCACAGG  |
| ENSG00000185739 | UCACCAC  |
| ENSG00000185760 | AGCAGCA  |
| ENSG00000185760 | AGCAGCG  |
| ENSG00000185760 | AUGCAUU  |
| ENSG00000185760 | GUUCAUG  |
| ENSG00000185774 | UCAACAG  |
| ENSG00000185774 | UGCAUAG  |
| ENSG00000185787 | AGCAGCU  |
| ENSG00000185787 | CACCAGC  |
| ENSG00000185787 | UUGGCAA  |
| ENSG00000185800 | ACUUGGA  |
| ENSG00000185800 | CAGCAGG  |
| ENSG00000185800 | CCAGGAG  |
| ENSG00000185800 | GGCAGUG  |
| ENSG00000185811 | AUUGCAC  |
| ENSG00000185811 | CAGGUGA  |
| ENSG00000185811 | CAGUGCA  |
| ENSG00000185811 | GAGGCAG  |
| ENSG00000185811 | GGCAAGA  |
| ENSG00000185811 | GUGCUUG  |
| ENSG00000185811 | UACAGUU  |
| ENSG00000185811 | UAUUGCU  |
| ENSG00000185811 | UCACAGG  |
| ENSG00000185811 | UCACCAC  |
| ENSG00000185811 | UGCAUAG  |
| ENSG00000185811 | UUGGCAA  |
| ENSG00000185818 | AACAAAC  |
| ENSG00000185818 | CAAAGCA  |
| ENSG00000185818 | CACAGGG  |
| ENSG00000185818 | CAGGCUC  |
| ENSG00000185818 | GUGCUUG  |
| ENSG00000185818 | UCACAGG  |
| ENSG00000185825 | GGCAGGG  |
| ENSG00000185860 | CAGCAGG  |
| ENSG00000185875 | UAUUGCU  |
| ENSG00000185875 | UCACAAG  |
| ENSG00000185883 | UAUAAAAG |
| ENSG00000185896 | AAAGAAU  |
| ENSG00000185896 | AAGUGUG  |
| ENSG00000185896 | AGUGUGC  |
| ENSG00000185896 | CUUUGGU  |
| ENSG00000185896 | UACAAAG  |
| ENSG00000185896 | UCCCUUU  |
| ENSG00000185896 | UGCAUAG  |
| ENSG00000185905 | GGCUCUG  |
| ENSG00000185909 | ACUCCAG  |
| ENSG00000185909 | GAGGAUA  |
| ENSG00000185909 | GAGGCAG  |
| ENSG00000185909 | GAGGUAG  |
| ENSG00000185909 | GAGGUAU  |
| ENSG00000185909 | GCCCUGU  |
| ENSG00000185920 | AAAAGUA  |
| ENSG00000185920 | AAACUGU  |
| ENSG00000185920 | AAAGAGG  |
| ENSG00000185920 | AAAGUAA  |
| ENSG00000185920 | AAAUCCC  |

|                 |          |
|-----------------|----------|
| ENSG00000185920 | AACAGUC  |
| ENSG00000185920 | AAUACUG  |
| ENSG00000185920 | AAUCCUU  |
| ENSG00000185920 | ACACACC  |
| ENSG00000185920 | ACAGUAU  |
| ENSG00000185920 | ACCAGCA  |
| ENSG00000185920 | AGCAGCA  |
| ENSG00000185920 | AGCUUAU  |
| ENSG00000185920 | AGGGUUG  |
| ENSG00000185920 | AUGGCAC  |
| ENSG00000185920 | AUUCAUU  |
| ENSG00000185920 | CACAGUG  |
| ENSG00000185920 | CACUGUU  |
| ENSG00000185920 | CCAGCAU  |
| ENSG00000185920 | CUCUCC   |
| ENSG00000185920 | CUGGAAA  |
| ENSG00000185920 | CUUUGGU  |
| ENSG00000185920 | GAGACCU  |
| ENSG00000185920 | GAUAUGU  |
| ENSG00000185920 | GCAGAAG  |
| ENSG00000185920 | GUGACUG  |
| ENSG00000185920 | UACAAAG  |
| ENSG00000185920 | UACAGUU  |
| ENSG00000185920 | UAUAAAG  |
| ENSG00000185920 | UAUAUGA  |
| ENSG00000185920 | UCACAGU  |
| ENSG00000185920 | UCAUACA  |
| ENSG00000185920 | UCCUUU   |
| ENSG00000185920 | UCUGGAG  |
| ENSG00000185920 | UGCAUAU  |
| ENSG00000185920 | UGCCAGC  |
| ENSG00000185920 | UUCAAGC  |
| ENSG00000185924 | AAAACUG  |
| ENSG00000185924 | AACACUG  |
| ENSG00000185924 | AUAU AAC |
| ENSG00000185924 | CUUUGGU  |
| ENSG00000185924 | GCCUGAU  |
| ENSG00000185924 | GGCAGUG  |
| ENSG00000185924 | GUGCAA   |
| ENSG00000185924 | UAUAAAG  |
| ENSG00000185924 | UAUAAUA  |
| ENSG00000185924 | UGCAUAG  |
| ENSG00000185924 | UUGGUCC  |
| ENSG00000185928 | GGGUGG   |
| ENSG00000185933 | AAUACUG  |
| ENSG00000185933 | GCCUGGG  |
| ENSG00000185946 | ACGCACU  |
| ENSG00000185950 | AAGUCAC  |
| ENSG00000185950 | AAGUCUU  |
| ENSG00000185950 | ACUGUUU  |
| ENSG00000185950 | AGCAGCA  |
| ENSG00000185950 | AUGCAUU  |
| ENSG00000185950 | AUGGCUU  |
| ENSG00000185950 | CCAGCAU  |
| ENSG00000185950 | GAGGUAG  |
| ENSG00000185950 | GAGGUAU  |
| ENSG00000185950 | GCAGCAU  |
| ENSG00000185950 | GUAAACA  |
| ENSG00000185950 | UAUUGCU  |
| ENSG00000185950 | UCACAUU  |
| ENSG00000185950 | UGAAAUG  |
| ENSG00000185950 | UGCAUUG  |
| ENSG00000185950 | UGUCUUU  |
| ENSG00000185950 | UUUGCAA  |

|                 |          |
|-----------------|----------|
| ENSG00000185960 | AUAAUAC  |
| ENSG00000185960 | UAAUGCU  |
| ENSG00000185960 | UUGGCAA  |
| ENSG00000185963 | AAAGUGC  |
| ENSG00000185963 | AAGGCAC  |
| ENSG00000185963 | AAGUGCA  |
| ENSG00000185963 | AAUACUG  |
| ENSG00000185963 | AAUCACU  |
| ENSG00000185963 | ACAGUAU  |
| ENSG00000185963 | AGUGCCU  |
| ENSG00000185963 | CAGCAA   |
| ENSG00000185963 | GGAUUUU  |
| ENSG00000185963 | UACAGUU  |
| ENSG00000185963 | UCAAGUA  |
| ENSG00000185963 | UCCUGAG  |
| ENSG00000185963 | UUCAAGC  |
| ENSG00000185963 | UUCUUGU  |
| ENSG00000185963 | UUGGCAA  |
| ENSG00000185963 | UUGGUUC  |
| ENSG00000185985 | AAGGCAC  |
| ENSG00000185985 | CAAAGCA  |
| ENSG00000185985 | CUUUGGU  |
| ENSG00000185985 | GAGAAAU  |
| ENSG00000185985 | UUGGAGG  |
| ENSG00000185989 | AAAAAUC  |
| ENSG00000186007 | CACAAUG  |
| ENSG00000186017 | AAGUGCU  |
| ENSG00000186020 | UCAUUUG  |
| ENSG00000186047 | ACAAUUAU |
| ENSG00000186047 | UUGUGUC  |
| ENSG00000186063 | AAAUGGU  |
| ENSG00000186063 | CACAAUG  |
| ENSG00000186063 | CACAGGG  |
| ENSG00000186063 | CUGGAAA  |
| ENSG00000186063 | GACCUGG  |
| ENSG00000186063 | UCACAGG  |
| ENSG00000186073 | AAAGUAA  |
| ENSG00000186073 | CAGCUGG  |
| ENSG00000186073 | CAGGUGA  |
| ENSG00000186073 | CCAGGAG  |
| ENSG00000186073 | CUCUUCC  |
| ENSG00000186073 | CUUCUCU  |
| ENSG00000186073 | GAAAACA  |
| ENSG00000186073 | GCAGGAC  |
| ENSG00000186073 | GCUUCCU  |
| ENSG00000186073 | GGAGGAG  |
| ENSG00000186073 | GGGUUUA  |
| ENSG00000186073 | UGCCAGC  |
| ENSG00000186073 | UGGCUGC  |
| ENSG00000186073 | UGUGUCA  |
| ENSG00000186073 | UUGACAC  |
| ENSG00000186074 | CCCUGAG  |
| ENSG00000186075 | UGACCUA  |
| ENSG00000186075 | UUCUAAU  |
| ENSG00000186081 | UAUAAAG  |
| ENSG00000186106 | GAGGUAG  |
| ENSG00000186106 | UUGGUCC  |
| ENSG00000186111 | AAGACAU  |
| ENSG00000186111 | ACAGUAU  |
| ENSG00000186111 | AUUGCAC  |
| ENSG00000186111 | GAUUGUC  |
| ENSG00000186111 | UAAGACG  |
| ENSG00000186111 | UAAGACU  |
| ENSG00000186111 | UGCAUAG  |

|                 |          |
|-----------------|----------|
| ENSG00000186111 | UUAGAGA  |
| ENSG00000186130 | AAGUGCU  |
| ENSG00000186130 | ACAAGGU  |
| ENSG00000186130 | CUUACAG  |
| ENSG00000186130 | GGAAUGU  |
| ENSG00000186130 | UGCCUG   |
| ENSG00000186143 | AGCCCUU  |
| ENSG00000186143 | GGCUCUG  |
| ENSG00000186150 | CCCUGAG  |
| ENSG00000186153 | UUGUGAC  |
| ENSG00000186174 | AAAAAUC  |
| ENSG00000186174 | AAAGCGC  |
| ENSG00000186174 | AAGGCAC  |
| ENSG00000186174 | ACAGUAU  |
| ENSG00000186174 | AGCACCA  |
| ENSG00000186174 | AGCAGCA  |
| ENSG00000186174 | AGGCAGG  |
| ENSG00000186174 | AUAU AAC |
| ENSG00000186174 | AUGGCUU  |
| ENSG00000186174 | CAGCAGA  |
| ENSG00000186174 | CCUUCAU  |
| ENSG00000186174 | CUGGGGG  |
| ENSG00000186174 | CUUCACC  |
| ENSG00000186174 | GCCUGGG  |
| ENSG00000186174 | GGAAGCC  |
| ENSG00000186174 | GUGCCUG  |
| ENSG00000186174 | UCACAUU  |
| ENSG00000186174 | UCCCUUU  |
| ENSG00000186174 | UGGCCCU  |
| ENSG00000186174 | UUCAAAU  |
| ENSG00000186184 | AGCACCA  |
| ENSG00000186184 | UGGCUGC  |
| ENSG00000186184 | UUCUUGU  |
| ENSG00000186187 | AAAAAUC  |
| ENSG00000186187 | AAUGCCC  |
| ENSG00000186187 | AAUUUUA  |
| ENSG00000186187 | ACAUCAC  |
| ENSG00000186187 | AGCCUGC  |
| ENSG00000186187 | AGGACAC  |
| ENSG00000186187 | AUGCCUU  |
| ENSG00000186187 | AUGUGCC  |
| ENSG00000186187 | CAAAACU  |
| ENSG00000186187 | CACAAUG  |
| ENSG00000186187 | CACCAGC  |
| ENSG00000186187 | CAGUGCA  |
| ENSG00000186187 | CUGCCCC  |
| ENSG00000186187 | CUGGGCA  |
| ENSG00000186187 | GAAAACA  |
| ENSG00000186187 | GAGCUGC  |
| ENSG00000186187 | GAGGGGC  |
| ENSG00000186187 | GAUUGUC  |
| ENSG00000186187 | GCCCUUA  |
| ENSG00000186187 | GGCUCUG  |
| ENSG00000186187 | GUCACUC  |
| ENSG00000186187 | GUGCCAC  |
| ENSG00000186187 | UAAUACA  |
| ENSG00000186187 | UAAUAUC  |
| ENSG00000186187 | UCCUCUC  |
| ENSG00000186187 | UCCUUGC  |
| ENSG00000186187 | UCUCAAG  |
| ENSG00000186187 | UCUGGAA  |
| ENSG00000186187 | UGCCAGC  |
| ENSG00000186187 | UGCCUG   |
| ENSG00000186187 | UUCAAAU  |

|                 |         |
|-----------------|---------|
| ENSG00000186187 | UUGGCAC |
| ENSG00000186197 | ACAGGUG |
| ENSG00000186197 | ACCUGGA |
| ENSG00000186197 | AGCAGCU |
| ENSG00000186197 | AGCUGCC |
| ENSG00000186197 | AGGAUGU |
| ENSG00000186197 | CCAGGAG |
| ENSG00000186197 | CUGGGCA |
| ENSG00000186197 | GGCAUUG |
| ENSG00000186197 | GGUUGUC |
| ENSG00000186197 | UCAUAGA |
| ENSG00000186197 | UCUCCAA |
| ENSG00000186212 | AACCUGG |
| ENSG00000186212 | UCCUCU  |
| ENSG00000186231 | GUUCAUG |
| ENSG00000186231 | UGACAUC |
| ENSG00000186260 | AAGUGCA |
| ENSG00000186260 | AAUCACU |
| ENSG00000186260 | AAUUGCU |
| ENSG00000186260 | ACUUGGA |
| ENSG00000186260 | AGUGCUG |
| ENSG00000186260 | AUGGCAC |
| ENSG00000186260 | CAGGAAC |
| ENSG00000186260 | CCAGUGU |
| ENSG00000186260 | CUAUACA |
| ENSG00000186260 | CUCAAAC |
| ENSG00000186260 | CUGGACU |
| ENSG00000186260 | CUUACAG |
| ENSG00000186260 | CUUUGGU |
| ENSG00000186260 | GAGAUGA |
| ENSG00000186260 | GAUAUGU |
| ENSG00000186260 | GGAAUGU |
| ENSG00000186260 | GGCAUUG |
| ENSG00000186260 | GGCUCAG |
| ENSG00000186260 | GGGGUGC |
| ENSG00000186260 | GUAACA  |
| ENSG00000186260 | UGCAGCU |
| ENSG00000186260 | UUCUUGU |
| ENSG00000186260 | UUGGCAC |
| ENSG00000186260 | UUGGUCC |
| ENSG00000186265 | AAUUUUA |
| ENSG00000186283 | AAUUUUA |
| ENSG00000186288 | CUCUGGG |
| ENSG00000186288 | CUGCAGG |
| ENSG00000186288 | GCUGGUG |
| ENSG00000186288 | UUGGCAA |
| ENSG00000186298 | ACCAGCA |
| ENSG00000186298 | AGUGGUU |
| ENSG00000186298 | AUCCCUU |
| ENSG00000186298 | AUGGCUU |
| ENSG00000186298 | UCACAGG |
| ENSG00000186298 | UCCCUUU |
| ENSG00000186298 | UGUGCUU |
| ENSG00000186310 | AAGGCAC |
| ENSG00000186310 | AGUGCAA |
| ENSG00000186310 | UAAUAGU |
| ENSG00000186310 | UCACAGG |
| ENSG00000186310 | UCACAGU |
| ENSG00000186314 | AACUACU |
| ENSG00000186314 | AAUUAUU |
| ENSG00000186314 | AUGGCUU |
| ENSG00000186318 | AACACUG |
| ENSG00000186318 | AAGGCAC |
| ENSG00000186318 | ACCUGGA |

|                 |         |
|-----------------|---------|
| ENSG00000186318 | AGCACCA |
| ENSG00000186318 | AGCAGCA |
| ENSG00000186318 | AGCCAGU |
| ENSG00000186318 | AUAAAGU |
| ENSG00000186318 | AUAAUAC |
| ENSG00000186318 | AUGGCUU |
| ENSG00000186318 | AUGUCUG |
| ENSG00000186318 | CACAGUG |
| ENSG00000186318 | CAGCAGG |
| ENSG00000186318 | GCCCUGU |
| ENSG00000186318 | GCCUGGG |
| ENSG00000186318 | GGAAGAC |
| ENSG00000186318 | GGGGUGC |
| ENSG00000186318 | GGGGUGG |
| ENSG00000186318 | GGUUUAC |
| ENSG00000186318 | UAAUACA |
| ENSG00000186318 | UAUAAAG |
| ENSG00000186318 | UAUAAUA |
| ENSG00000186318 | UCACAGG |
| ENSG00000186318 | UCCUGAG |
| ENSG00000186318 | UGCCAGC |
| ENSG00000186318 | UGCCUG  |
| ENSG00000186318 | UGGGACA |
| ENSG00000186318 | UGGGUGA |
| ENSG00000186318 | UUGGUUC |
| ENSG00000186326 | UAAUAGU |
| ENSG00000186326 | UUCUUGU |
| ENSG00000186335 | UGCAAAG |
| ENSG00000186340 | AAGGCAC |
| ENSG00000186340 | ACGUCAU |
| ENSG00000186340 | CAGCAGA |
| ENSG00000186340 | CUUUGGU |
| ENSG00000186340 | GUAAACA |
| ENSG00000186340 | UACAAAG |
| ENSG00000186350 | AAAGCUG |
| ENSG00000186350 | AAGGCAC |
| ENSG00000186350 | ACGCUCA |
| ENSG00000186350 | AGUGCUG |
| ENSG00000186350 | AGUGCUU |
| ENSG00000186350 | AUUCAUU |
| ENSG00000186350 | CAAAGCA |
| ENSG00000186350 | CACAGUG |
| ENSG00000186350 | CCCACCG |
| ENSG00000186350 | CCCACCU |
| ENSG00000186350 | CUUUGGU |
| ENSG00000186350 | GAUUGUC |
| ENSG00000186350 | GCAGAAG |
| ENSG00000186350 | GGAUUUC |
| ENSG00000186350 | GGCAUUG |
| ENSG00000186350 | UCACAGG |
| ENSG00000186350 | UCACAGU |
| ENSG00000186350 | UCACCAC |
| ENSG00000186350 | UCCACC  |
| ENSG00000186352 | CUUCACC |
| ENSG00000186354 | AACAAAC |
| ENSG00000186354 | AGAUGUG |
| ENSG00000186354 | AUGGAUU |
| ENSG00000186354 | CACCACC |
| ENSG00000186354 | CUUGGAG |
| ENSG00000186354 | UCACACA |
| ENSG00000186354 | UUCUUGU |
| ENSG00000186364 | AAGUUGU |
| ENSG00000186416 | AAGGCAC |
| ENSG00000186416 | ACCACAG |

|                 |         |
|-----------------|---------|
| ENSG00000186416 | AGCACCA |
| ENSG00000186417 | AGCUGCC |
| ENSG00000186417 | CUUUGGU |
| ENSG00000186417 | GCAACUU |
| ENSG00000186417 | GCCUGGG |
| ENSG00000186432 | AAACUGU |
| ENSG00000186432 | AAAGAGC |
| ENSG00000186432 | AAAGAGG |
| ENSG00000186432 | AAAGGUA |
| ENSG00000186432 | AAAGUGC |
| ENSG00000186432 | AACACUG |
| ENSG00000186432 | AAGGCAC |
| ENSG00000186432 | ACCACAG |
| ENSG00000186432 | AGAUAAA |
| ENSG00000186432 | AGCAUUC |
| ENSG00000186432 | AGUGCUG |
| ENSG00000186432 | AUAAAGU |
| ENSG00000186432 | CAAAUGC |
| ENSG00000186432 | CAGUGCA |
| ENSG00000186432 | CCAGUGC |
| ENSG00000186432 | GAUAUGU |
| ENSG00000186432 | GCACCAU |
| ENSG00000186432 | GCAGCAU |
| ENSG00000186432 | GCCUGGG |
| ENSG00000186432 | GGCUCAG |
| ENSG00000186432 | GGCUGCG |
| ENSG00000186432 | GUAUGUU |
| ENSG00000186432 | GUCCAGA |
| ENSG00000186432 | GUGCAA  |
| ENSG00000186432 | UAAUGCU |
| ENSG00000186432 | UCAUUUG |
| ENSG00000186432 | UGCAUUG |
| ENSG00000186432 | UGGCUGC |
| ENSG00000186432 | UGUGCUU |
| ENSG00000186432 | UUCCUAG |
| ENSG00000186432 | UUCUGCA |
| ENSG00000186439 | GUAAACA |
| ENSG00000186442 | ACAUCAC |
| ENSG00000186442 | GGCGACA |
| ENSG00000186469 | AACAUUC |
| ENSG00000186469 | AACUCUA |
| ENSG00000186469 | AAGGCAC |
| ENSG00000186469 | ACAUUCA |
| ENSG00000186469 | AGCACCA |
| ENSG00000186469 | AGCAGCU |
| ENSG00000186469 | CCAGGAG |
| ENSG00000186469 | CUGGAAA |
| ENSG00000186469 | GAGGUAU |
| ENSG00000186469 | GCAGAAG |
| ENSG00000186469 | GCUGUCU |
| ENSG00000186469 | GUAACAG |
| ENSG00000186469 | UCACAUU |
| ENSG00000186469 | UCAUUCG |
| ENSG00000186469 | UCUGGAA |
| ENSG00000186469 | UGCCCUG |
| ENSG00000186470 | AAUCUCU |
| ENSG00000186472 | AAAAGUA |
| ENSG00000186472 | ACCAGCA |
| ENSG00000186472 | AUACAAG |
| ENSG00000186472 | CAGCAGA |
| ENSG00000186472 | CAGUAGU |
| ENSG00000186472 | CCAGUAC |
| ENSG00000186472 | GAGCCCU |
| ENSG00000186472 | GCUGGUG |



|                 |          |
|-----------------|----------|
| ENSG00000186472 | GGUUACC  |
| ENSG00000186472 | GUGCUUG  |
| ENSG00000186472 | UCCAGUU  |
| ENSG00000186472 | UGCAUUAU |
| ENSG00000186472 | UUGGCAC  |
| ENSG00000186472 | UUGGUCC  |
| ENSG00000186479 | AAAGUAA  |
| ENSG00000186479 | AACACUG  |
| ENSG00000186479 | AAGACAU  |
| ENSG00000186479 | ACCAGCA  |
| ENSG00000186479 | ACUGGAU  |
| ENSG00000186479 | AGCUUAU  |
| ENSG00000186479 | CACAAUG  |
| ENSG00000186479 | CAGUAGA  |
| ENSG00000186479 | CCAGCAU  |
| ENSG00000186479 | CCUGCUG  |
| ENSG00000186479 | UAUAAAG  |
| ENSG00000186479 | UCUCCAA  |
| ENSG00000186479 | UCUGGAG  |
| ENSG00000186479 | UGCAUAG  |
| ENSG00000186479 | UUCCUAG  |
| ENSG00000186479 | UUGAGGC  |
| ENSG00000186480 | AAAACUG  |
| ENSG00000186480 | ACAAGGU  |
| ENSG00000186480 | AGCACCA  |
| ENSG00000186480 | AUGGCAC  |
| ENSG00000186480 | AUUGCAC  |
| ENSG00000186480 | GAGUAUU  |
| ENSG00000186480 | GAUUGGU  |
| ENSG00000186480 | GAUUGUC  |
| ENSG00000186480 | GCACCAU  |
| ENSG00000186480 | GUGCAAA  |
| ENSG00000186480 | UCCUAUA  |
| ENSG00000186480 | UGCUCAC  |
| ENSG00000186480 | UGUGCUU  |
| ENSG00000186480 | UUCAAAU  |
| ENSG00000186487 | AAAAAUC  |
| ENSG00000186487 | AAACUGU  |
| ENSG00000186487 | AAAGCUG  |
| ENSG00000186487 | AAAGUAA  |
| ENSG00000186487 | AAAGUAC  |
| ENSG00000186487 | AAAGUAU  |
| ENSG00000186487 | AAAUCCC  |
| ENSG00000186487 | AAGUCUU  |
| ENSG00000186487 | AAGUGCA  |
| ENSG00000186487 | ACAAGGU  |
| ENSG00000186487 | ACAAUAU  |
| ENSG00000186487 | ACAUAGA  |
| ENSG00000186487 | ACAUUAC  |
| ENSG00000186487 | ACCCUGU  |
| ENSG00000186487 | ACUGUUU  |
| ENSG00000186487 | AGCAGCU  |
| ENSG00000186487 | AGCAUUC  |
| ENSG00000186487 | AGUGCAA  |
| ENSG00000186487 | AGUGCCG  |
| ENSG00000186487 | AUAAAGU  |
| ENSG00000186487 | AUACAAG  |
| ENSG00000186487 | AUAU AAC |
| ENSG00000186487 | AUGCAUU  |
| ENSG00000186487 | AUGGCUU  |
| ENSG00000186487 | AUUGCAC  |
| ENSG00000186487 | CAAAGCA  |
| ENSG00000186487 | CACACCU  |
| ENSG00000186487 | CACUGUU  |

|                 |         |
|-----------------|---------|
| ENSG00000186487 | CAGCAAA |
| ENSG00000186487 | CCCUGUC |
| ENSG00000186487 | CCCUGUU |
| ENSG00000186487 | CUACAAA |
| ENSG00000186487 | CUUGUAU |
| ENSG00000186487 | GAAACAU |
| ENSG00000186487 | GAAGGAA |
| ENSG00000186487 | GACCCUG |
| ENSG00000186487 | GAGUAUU |
| ENSG00000186487 | GCAACUU |
| ENSG00000186487 | GGCAGCG |
| ENSG00000186487 | GUAUUCU |
| ENSG00000186487 | GUGACAG |
| ENSG00000186487 | GUGCAAA |
| ENSG00000186487 | GUGCUUG |
| ENSG00000186487 | GUGUCAC |
| ENSG00000186487 | UAAUAGU |
| ENSG00000186487 | UAUAAAG |
| ENSG00000186487 | UAUCAGA |
| ENSG00000186487 | UCCUGU  |
| ENSG00000186487 | UCCUUU  |
| ENSG00000186487 | UGCAUUA |
| ENSG00000186487 | UUAGAGA |
| ENSG00000186487 | UUCUAAU |
| ENSG00000186487 | UUGGCAA |
| ENSG00000186487 | UUGUGAC |
| ENSG00000186487 | UUUUUGC |
| ENSG00000186493 | CGCCUCC |
| ENSG00000186501 | CUGGAAA |
| ENSG00000186501 | GAGGCAG |
| ENSG00000186501 | UCUGGAA |
| ENSG00000186517 | AGUGCUU |
| ENSG00000186522 | CAAGAGC |
| ENSG00000186522 | CUGGAAA |
| ENSG00000186522 | UCUGGAA |
| ENSG00000186523 | GGAUGAG |
| ENSG00000186530 | AGCCAGU |
| ENSG00000186530 | CUGGGGG |
| ENSG00000186530 | GGGGCAG |
| ENSG00000186530 | GGGGUGG |
| ENSG00000186530 | UCUCCAA |
| ENSG00000186530 | UCCUAG  |
| ENSG00000186532 | GGAAUGU |
| ENSG00000186532 | GGAGUGU |
| ENSG00000186532 | UCCACA  |
| ENSG00000186532 | UCCACC  |
| ENSG00000186564 | GCCUGGG |
| ENSG00000186564 | UCACAUU |
| ENSG00000186564 | UCUGGAG |
| ENSG00000186564 | UGUCUUU |
| ENSG00000186566 | AAAGAGC |
| ENSG00000186566 | AAAGAGG |
| ENSG00000186566 | AAAGUUU |
| ENSG00000186566 | AAGGCAC |
| ENSG00000186566 | ACAUUAC |
| ENSG00000186566 | AGUGCAA |
| ENSG00000186566 | AUAUUAU |
| ENSG00000186566 | AUCACUA |
| ENSG00000186566 | AUUGCAC |
| ENSG00000186566 | CCAGUGU |
| ENSG00000186566 | CCCUGAG |
| ENSG00000186566 | CUUUGGU |
| ENSG00000186566 | GAAAACA |
| ENSG00000186566 | GAAACAU |

|                 |          |
|-----------------|----------|
| ENSG00000186566 | GAGCUAA  |
| ENSG00000186566 | GCAGCAU  |
| ENSG00000186566 | GGUUUAC  |
| ENSG00000186566 | GUUAAUG  |
| ENSG00000186566 | UAAUACA  |
| ENSG00000186566 | UAUAUGA  |
| ENSG00000186566 | UAUUGCU  |
| ENSG00000186566 | UCCAGUU  |
| ENSG00000186566 | UCCUAUA  |
| ENSG00000186566 | UGCUCAC  |
| ENSG00000186566 | UGGCUGC  |
| ENSG00000186566 | UUUGCAA  |
| ENSG00000186566 | UUUGCAC  |
| ENSG00000186575 | AUGUAAU  |
| ENSG00000186575 | AUUGCAC  |
| ENSG00000186575 | CCCUGUC  |
| ENSG00000186575 | CCUGCUG  |
| ENSG00000186575 | GAGAACU  |
| ENSG00000186575 | UGGCCCU  |
| ENSG00000186575 | UUGAGGC  |
| ENSG00000186577 | UACAAAG  |
| ENSG00000186591 | AUAAUAC  |
| ENSG00000186591 | AUAU AAC |
| ENSG00000186591 | AUGCAUU  |
| ENSG00000186591 | AUGUGGG  |
| ENSG00000186591 | AUUCAUU  |
| ENSG00000186591 | CAGUAGA  |
| ENSG00000186591 | CAGUAGU  |
| ENSG00000186591 | CAUAUUG  |
| ENSG00000186591 | CUUUGGU  |
| ENSG00000186591 | GAUUGUA  |
| ENSG00000186591 | GAUUGUC  |
| ENSG00000186591 | GUGCUUG  |
| ENSG00000186591 | UAUCAGA  |
| ENSG00000186591 | UAUUGCU  |
| ENSG00000186591 | UGAGAAG  |
| ENSG00000186591 | UGAGAAU  |
| ENSG00000186594 | UAAUAUC  |
| ENSG00000186603 | CACACCU  |
| ENSG00000186629 | AAAGCUG  |
| ENSG00000186629 | AGCCCUU  |
| ENSG00000186629 | CAGGUGA  |
| ENSG00000186629 | CCAGGAG  |
| ENSG00000186629 | UCCUGAG  |
| ENSG00000186629 | UCUGGAA  |
| ENSG00000186629 | UCUGGAG  |
| ENSG00000186629 | UCUUGAG  |
| ENSG00000186629 | UGGCCAC  |
| ENSG00000186629 | UCCAUA   |
| ENSG00000186638 | GAGAACU  |
| ENSG00000186638 | UACAAAG  |
| ENSG00000186638 | UGCAAAG  |
| ENSG00000186642 | AAGGCAC  |
| ENSG00000186648 | GGAGAGA  |
| ENSG00000186652 | GAGGCAG  |
| ENSG00000186660 | AAAGUAC  |
| ENSG00000186660 | AAAUUUC  |
| ENSG00000186660 | AAGUGCA  |
| ENSG00000186660 | AGCACCA  |
| ENSG00000186660 | AGUGAUC  |
| ENSG00000186660 | AGUGCAA  |
| ENSG00000186660 | AGUGCUG  |
| ENSG00000186660 | CAAAGUG  |
| ENSG00000186660 | CUAGGCU  |

|                 |         |
|-----------------|---------|
| ENSG00000186660 | GAGGCUG |
| ENSG00000186660 | GCACCAU |
| ENSG00000186660 | GGAAUGU |
| ENSG00000186660 | GUAGUGU |
| ENSG00000186660 | GUGCAA  |
| ENSG00000186660 | UGAGGAC |
| ENSG00000186675 | AUUCAUU |
| ENSG00000186687 | AGAUAAA |
| ENSG00000186687 | CCAGGAG |
| ENSG00000186687 | UACAAAG |
| ENSG00000186714 | UAUAAAG |
| ENSG00000186714 | UUGUUCG |
| ENSG00000186716 | AAAGUGC |
| ENSG00000186716 | AGCAGCA |
| ENSG00000186716 | GGAAGAC |
| ENSG00000186716 | GUCUCUG |
| ENSG00000186732 | UCCUGAG |
| ENSG00000186766 | ACACACC |
| ENSG00000186767 | AAAGUAC |
| ENSG00000186787 | GUCUACU |
| ENSG00000186815 | UGCAUUA |
| ENSG00000186834 | AAAGUUU |
| ENSG00000186834 | AAGGCAC |
| ENSG00000186834 | AAUGUUG |
| ENSG00000186834 | ACAUUCA |
| ENSG00000186834 | AUAUAAC |
| ENSG00000186834 | CCAGUGC |
| ENSG00000186834 | CCAGUGU |
| ENSG00000186834 | UACAAAG |
| ENSG00000186834 | UUCAAAU |
| ENSG00000186868 | AACAGUC |
| ENSG00000186868 | ACAUUCA |
| ENSG00000186868 | CAUGGGU |
| ENSG00000186868 | GAUUGUC |
| ENSG00000186868 | GCAGGUU |
| ENSG00000186868 | GGCUCUG |
| ENSG00000186868 | GUCACUC |
| ENSG00000186868 | UACAAAG |
| ENSG00000186868 | UCACAGG |
| ENSG00000186868 | UCACAGU |
| ENSG00000186897 | GGCGCCU |
| ENSG00000186908 | AAGGCAC |
| ENSG00000186908 | AGCAGCU |
| ENSG00000186908 | GGUCUAG |
| ENSG00000186908 | GUAACA  |
| ENSG00000186908 | UACAAAG |
| ENSG00000186918 | AAAAAUC |
| ENSG00000186918 | AACAGUC |
| ENSG00000186918 | AACCUUG |
| ENSG00000186918 | AAGACAU |
| ENSG00000186918 | AAGGCGC |
| ENSG00000186918 | AAUACUG |
| ENSG00000186918 | ACUCAGC |
| ENSG00000186918 | AGUAACA |
| ENSG00000186918 | AUAUAC  |
| ENSG00000186918 | CAGACAG |
| ENSG00000186918 | CCCUGAG |
| ENSG00000186918 | GGCUCUG |
| ENSG00000186918 | GUAACAG |
| ENSG00000186918 | GUAGUGU |
| ENSG00000186918 | GUCAGUU |
| ENSG00000186918 | UAUAAAG |
| ENSG00000186918 | UCCUCU  |
| ENSG00000186918 | UUGGUCC |

|                 |         |
|-----------------|---------|
| ENSG00000186951 | AAACUGU |
| ENSG00000186951 | AAUUGCU |
| ENSG00000186951 | ACAGUAC |
| ENSG00000186951 | ACCCUGU |
| ENSG00000186951 | AGCAAAA |
| ENSG00000186951 | AGCUGCC |
| ENSG00000186951 | CAAAACU |
| ENSG00000186951 | CAAGAGC |
| ENSG00000186951 | CACAGUG |
| ENSG00000186951 | GAGCUGC |
| ENSG00000186951 | GAGGUAG |
| ENSG00000186951 | GGCUCAG |
| ENSG00000186951 | GUGAGGU |
| ENSG00000186951 | UACAGUU |
| ENSG00000186951 | UCCCUGU |
| ENSG00000186998 | CCCUGAG |
| ENSG00000186998 | GACCCUG |
| ENSG00000187017 | CACCACC |
| ENSG00000187033 | AAAACUG |
| ENSG00000187049 | UCAUGAU |
| ENSG00000187068 | AGCAUUC |
| ENSG00000187068 | AUGGCUU |
| ENSG00000187068 | CCCCUGG |
| ENSG00000187068 | GAGCUGC |
| ENSG00000187068 | GGAAUGU |
| ENSG00000187068 | GGCAGUG |
| ENSG00000187068 | GGCUGCG |
| ENSG00000187068 | UCAUACA |
| ENSG00000187068 | UGAAGCU |
| ENSG00000187068 | UGGCUGC |
| ENSG00000187068 | UUAGGAU |
| ENSG00000187068 | UUCCAUA |
| ENSG00000187068 | UUCUAAU |
| ENSG00000187068 | UUUCAAC |
| ENSG00000187079 | AAAACUG |
| ENSG00000187079 | AAAGAGC |
| ENSG00000187079 | AAAGGUA |
| ENSG00000187079 | AAAGUAA |
| ENSG00000187079 | AACAGUC |
| ENSG00000187079 | AACAUUC |
| ENSG00000187079 | AAGACAU |
| ENSG00000187079 | AAGUCAC |
| ENSG00000187079 | AAUACUG |
| ENSG00000187079 | AAUCUCA |
| ENSG00000187079 | ACAUUCA |
| ENSG00000187079 | ACCUGGA |
| ENSG00000187079 | ACUGUAG |
| ENSG00000187079 | AGCAGCA |
| ENSG00000187079 | AGCAUUC |
| ENSG00000187079 | AGUAACA |
| ENSG00000187079 | AGUGGUU |
| ENSG00000187079 | AUGGAUU |
| ENSG00000187079 | AUGGCAC |
| ENSG00000187079 | AUUCAUU |
| ENSG00000187079 | CAGGAAC |
| ENSG00000187079 | CAGUGCA |
| ENSG00000187079 | CCAGUAC |
| ENSG00000187079 | CCUUCAU |
| ENSG00000187079 | CUGCAGC |
| ENSG00000187079 | CUUGUAU |
| ENSG00000187079 | CUUUGGU |
| ENSG00000187079 | GCUGGUG |
| ENSG00000187079 | GCUUCCU |
| ENSG00000187079 | GGCAGCG |

|                 |          |
|-----------------|----------|
| ENSG00000187079 | GGGGAGC  |
| ENSG00000187079 | GGUUUAC  |
| ENSG00000187079 | GUAAACA  |
| ENSG00000187079 | GUAACAG  |
| ENSG00000187079 | GUAGUGU  |
| ENSG00000187079 | GUCACUC  |
| ENSG00000187079 | GUCAUUG  |
| ENSG00000187079 | GUCUACU  |
| ENSG00000187079 | GUCUGCC  |
| ENSG00000187079 | GUGAAUG  |
| ENSG00000187079 | UACAGUU  |
| ENSG00000187079 | UAGUGAG  |
| ENSG00000187079 | UAUUGCU  |
| ENSG00000187079 | UCACAAG  |
| ENSG00000187079 | UCACACA  |
| ENSG00000187079 | UCACAUU  |
| ENSG00000187079 | UCUAGAG  |
| ENSG00000187079 | UGUCUGC  |
| ENSG00000187079 | UGUCUGG  |
| ENSG00000187079 | UGUGUCA  |
| ENSG00000187079 | UUAGAGA  |
| ENSG00000187079 | UUCUAAU  |
| ENSG00000187079 | UUGAGGC  |
| ENSG00000187079 | UUGGCAA  |
| ENSG00000187079 | UUGGCAC  |
| ENSG00000187079 | UUGGUUC  |
| ENSG00000187079 | UUGUUCG  |
| ENSG00000187079 | UUUGCAA  |
| ENSG00000187091 | AGCAGCA  |
| ENSG00000187091 | GAGGCAG  |
| ENSG00000187097 | GAGGCAG  |
| ENSG00000187098 | AGUAACA  |
| ENSG00000187098 | AUUGCAC  |
| ENSG00000187098 | CAGCAGG  |
| ENSG00000187098 | GAGAAAU  |
| ENSG00000187098 | GUGCUUG  |
| ENSG00000187098 | UCACAUU  |
| ENSG00000187098 | UCAUUCG  |
| ENSG00000187098 | UGCAUAG  |
| ENSG00000187109 | AAAGUAA  |
| ENSG00000187109 | AAGGCAC  |
| ENSG00000187109 | ACAGUAC  |
| ENSG00000187109 | ACUGCAU  |
| ENSG00000187109 | ACUGGAU  |
| ENSG00000187109 | AGCCUGC  |
| ENSG00000187109 | AGGUUUAU |
| ENSG00000187109 | CAA AUGC |
| ENSG00000187109 | CAGUAGU  |
| ENSG00000187109 | CAGUGCA  |
| ENSG00000187109 | CUUUGGU  |
| ENSG00000187109 | GCAGAAG  |
| ENSG00000187109 | GCUACAU  |
| ENSG00000187109 | GGCUCUG  |
| ENSG00000187109 | UAAGACG  |
| ENSG00000187109 | UAAGACU  |
| ENSG00000187109 | UCACAUU  |
| ENSG00000187122 | AAGGCAC  |
| ENSG00000187122 | GUGCAAA  |
| ENSG00000187123 | AAAAAUC  |
| ENSG00000187123 | AAGUGCU  |
| ENSG00000187123 | AGUGCCU  |
| ENSG00000187123 | AGUGCUU  |
| ENSG00000187123 | AUAUUAU  |
| ENSG00000187123 | CACCACC  |

|                 |         |
|-----------------|---------|
| ENSG00000187123 | CCCUGAG |
| ENSG00000187123 | CCUUCAU |
| ENSG00000187123 | CUGUUGA |
| ENSG00000187123 | GAAGGAA |
| ENSG00000187123 | UCCUCU  |
| ENSG00000187123 | UGUUGAA |
| ENSG00000187123 | UUUCAAC |
| ENSG00000187140 | AAAAAUC |
| ENSG00000187140 | AAAACUG |
| ENSG00000187140 | AACAUUC |
| ENSG00000187140 | AAGUUGU |
| ENSG00000187140 | AGAUAAA |
| ENSG00000187140 | AUAAUAC |
| ENSG00000187140 | AUAUAAC |
| ENSG00000187140 | UCAUUCG |
| ENSG00000187145 | CCUUCUU |
| ENSG00000187147 | AGGCAGG |
| ENSG00000187147 | AUAUUAU |
| ENSG00000187147 | CAAUUGC |
| ENSG00000187147 | CACACCG |
| ENSG00000187147 | CACACCU |
| ENSG00000187147 | CUGGCUC |
| ENSG00000187147 | GAGCUAA |
| ENSG00000187147 | GAGGCAG |
| ENSG00000187147 | GUGCUUG |
| ENSG00000187147 | UAAGACU |
| ENSG00000187147 | UCCAGAG |
| ENSG00000187147 | UGUAUAA |
| ENSG00000187147 | UGUGCUU |
| ENSG00000187164 | AACAAAC |
| ENSG00000187164 | AGCCCUU |
| ENSG00000187164 | CAAAACU |
| ENSG00000187164 | CCAUUAC |
| ENSG00000187164 | CCCUGAG |
| ENSG00000187164 | GUGCAAA |
| ENSG00000187164 | UUAGGAU |
| ENSG00000187164 | UUGGUUC |
| ENSG00000187172 | AAAAGUA |
| ENSG00000187172 | AAAGUAU |
| ENSG00000187172 | ACUCCAG |
| ENSG00000187172 | AUCCCUU |
| ENSG00000187172 | AUGGCAC |
| ENSG00000187172 | CACUGUU |
| ENSG00000187172 | CCCUGAG |
| ENSG00000187172 | CUGGGGG |
| ENSG00000187172 | CUUCUCU |
| ENSG00000187172 | GGAGUGU |
| ENSG00000187172 | GGUGGGC |
| ENSG00000187172 | GGUUUAC |
| ENSG00000187172 | GUCACUC |
| ENSG00000187172 | GUGACUG |
| ENSG00000187172 | UGAAAUG |
| ENSG00000187172 | UGGUACC |
| ENSG00000187172 | UGUCUGG |
| ENSG00000187175 | GUGGCC  |
| ENSG00000187175 | GUGUGGC |
| ENSG00000187189 | AAAAAUC |
| ENSG00000187189 | CCAGCAU |
| ENSG00000187189 | GAGGCAG |
| ENSG00000187189 | GGAAUGU |
| ENSG00000187189 | GUUAGGA |
| ENSG00000187189 | UCCAGUU |
| ENSG00000187189 | UUUGCAA |
| ENSG00000187191 | GAUUGGU |

|                 |         |
|-----------------|---------|
| ENSG00000187191 | UCUUGAG |
| ENSG00000187210 | AGCAAAA |
| ENSG00000187210 | GAGAUGA |
| ENSG00000187210 | UUGGCAA |
| ENSG00000187231 | GCACCAU |
| ENSG00000187231 | UGAAAUG |
| ENSG00000187239 | AAGGCAC |
| ENSG00000187239 | AAGGUGC |
| ENSG00000187239 | AUGCAUU |
| ENSG00000187239 | CCCUGUC |
| ENSG00000187239 | CUCCAGC |
| ENSG00000187239 | CUGCAGC |
| ENSG00000187239 | CUUUGGU |
| ENSG00000187239 | GGAAGCC |
| ENSG00000187239 | GGACUGC |
| ENSG00000187239 | UGACUGU |
| ENSG00000187239 | UGCAGCU |
| ENSG00000187239 | UGGACUG |
| ENSG00000187239 | UGUGUGG |
| ENSG00000187239 | UUCUGCA |
| ENSG00000187239 | UUGGUUC |
| ENSG00000187257 | AGUGCUG |
| ENSG00000187257 | AGUGCUU |
| ENSG00000187257 | CAGUGCA |
| ENSG00000187257 | CUACAGU |
| ENSG00000187257 | GGAAUGU |
| ENSG00000187257 | UGGCCCU |
| ENSG00000187288 | GUGGGGA |
| ENSG00000187323 | AAUCCUU |
| ENSG00000187323 | AUCCUUU |
| ENSG00000187323 | CCUGUAC |
| ENSG00000187323 | CUUUGGU |
| ENSG00000187323 | UAAGACU |
| ENSG00000187323 | UGCAUAG |
| ENSG00000187323 | UGUGCUU |
| ENSG00000187325 | AACAUUC |
| ENSG00000187325 | ACAUUCA |
| ENSG00000187325 | AGGCAGG |
| ENSG00000187325 | AGUGGUU |
| ENSG00000187325 | GAGAACC |
| ENSG00000187325 | GAGAACU |
| ENSG00000187325 | GAGGUAG |
| ENSG00000187325 | GAGGUAU |
| ENSG00000187391 | AAAAAUC |
| ENSG00000187391 | AAAAGUA |
| ENSG00000187391 | AACACUG |
| ENSG00000187391 | AGUGGUU |
| ENSG00000187391 | CCCUGUC |
| ENSG00000187391 | CUGCAGC |
| ENSG00000187391 | CUUACAG |
| ENSG00000187391 | GAUAUGU |
| ENSG00000187391 | GGAAUGU |
| ENSG00000187391 | GUAAACA |
| ENSG00000187391 | GUGACUG |
| ENSG00000187391 | GUGCUUG |
| ENSG00000187391 | UCAUACA |
| ENSG00000187391 | UUAUGCA |
| ENSG00000187391 | UCCAUA  |
| ENSG00000187391 | UUGACAC |
| ENSG00000187398 | AGGUUAU |
| ENSG00000187416 | AAAUGGU |
| ENSG00000187416 | AACAAAC |
| ENSG00000187416 | AACUACU |
| ENSG00000187416 | AAGUUGU |



|                 |          |
|-----------------|----------|
| ENSG00000187416 | ACACACC  |
| ENSG00000187416 | ACACACU  |
| ENSG00000187416 | AGUAACA  |
| ENSG00000187416 | AUGAGCU  |
| ENSG00000187416 | GAGCUGC  |
| ENSG00000187416 | GGACCUG  |
| ENSG00000187416 | GGGAACG  |
| ENSG00000187416 | UACAAAG  |
| ENSG00000187416 | UAGUGAG  |
| ENSG00000187416 | UGUGUGG  |
| ENSG00000187475 | AAAGAGC  |
| ENSG00000187486 | AGCCAGU  |
| ENSG00000187486 | CUCACAC  |
| ENSG00000187486 | GAGGCUG  |
| ENSG00000187486 | GUAACAG  |
| ENSG00000187498 | AAUUGCU  |
| ENSG00000187498 | AGCUUUAU |
| ENSG00000187498 | AUAU AAC |
| ENSG00000187498 | CAGCAAA  |
| ENSG00000187498 | GAGGUAG  |
| ENSG00000187498 | GAGGUAU  |
| ENSG00000187498 | GUGAGGU  |
| ENSG00000187498 | UAUUACC  |
| ENSG00000187510 | GAGGUAU  |
| ENSG00000187531 | AAAGUGC  |
| ENSG00000187531 | CAAAGUG  |
| ENSG00000187555 | AAAAACC  |
| ENSG00000187555 | AACUCUA  |
| ENSG00000187555 | ACUCAAA  |
| ENSG00000187555 | ACUGCAG  |
| ENSG00000187555 | ACUGCAU  |
| ENSG00000187555 | AGCAAAA  |
| ENSG00000187555 | AUACAAG  |
| ENSG00000187555 | CAAAACU  |
| ENSG00000187555 | CAGCAAA  |
| ENSG00000187555 | CAGUGCA  |
| ENSG00000187555 | CCAGCAU  |
| ENSG00000187555 | GGAGGAG  |
| ENSG00000187555 | UAGUGAG  |
| ENSG00000187555 | UAUAAAAG |
| ENSG00000187555 | UCAACAG  |
| ENSG00000187555 | UGCUCAC  |
| ENSG00000187555 | UGCUGAC  |
| ENSG00000187566 | AAAUUUC  |
| ENSG00000187595 | AAAGUUU  |
| ENSG00000187595 | ACUGGCC  |
| ENSG00000187595 | ACUGGCU  |
| ENSG00000187595 | AGCACCA  |
| ENSG00000187595 | CACAGUG  |
| ENSG00000187595 | UCAUUUG  |
| ENSG00000187595 | UCCCUCU  |
| ENSG00000187595 | UGCAUUAU |
| ENSG00000187605 | AAAAGUA  |
| ENSG00000187605 | AAAUGGU  |
| ENSG00000187605 | AACACUG  |
| ENSG00000187605 | AACCUGG  |
| ENSG00000187605 | AAGGCAC  |
| ENSG00000187605 | AAGUAGC  |
| ENSG00000187605 | ACAAUAU  |
| ENSG00000187605 | ACAGUAC  |
| ENSG00000187605 | ACAGUAU  |
| ENSG00000187605 | ACCACAG  |
| ENSG00000187605 | ACUGUAG  |
| ENSG00000187605 | AGCAGCA  |

|                 |          |
|-----------------|----------|
| ENSG00000187605 | AGCAUUC  |
| ENSG00000187605 | AGGUUUAU |
| ENSG00000187605 | AGUGCAA  |
| ENSG00000187605 | AGUGCUG  |
| ENSG00000187605 | AGUGCUU  |
| ENSG00000187605 | AUAAUAC  |
| ENSG00000187605 | AUGGCAC  |
| ENSG00000187605 | CAAAGCA  |
| ENSG00000187605 | CAAAGUG  |
| ENSG00000187605 | CAGCAGA  |
| ENSG00000187605 | CAGCAGG  |
| ENSG00000187605 | CAGGAAC  |
| ENSG00000187605 | CCAGCAU  |
| ENSG00000187605 | CCCUGAG  |
| ENSG00000187605 | CCUGUAC  |
| ENSG00000187605 | CUAGUCC  |
| ENSG00000187605 | CUCCAUU  |
| ENSG00000187605 | CUCCCAA  |
| ENSG00000187605 | CUGCUCU  |
| ENSG00000187605 | CUGGCUC  |
| ENSG00000187605 | CUUGGGC  |
| ENSG00000187605 | GAAACAU  |
| ENSG00000187605 | GAAGGUC  |
| ENSG00000187605 | GAGACCU  |
| ENSG00000187605 | GAGGCAG  |
| ENSG00000187605 | GCAUCCC  |
| ENSG00000187605 | GCUAGCA  |
| ENSG00000187605 | GGAGGCA  |
| ENSG00000187605 | GUAAACA  |
| ENSG00000187605 | GUAGUGU  |
| ENSG00000187605 | GUGACAG  |
| ENSG00000187605 | GUGCAAA  |
| ENSG00000187605 | UAUGGUU  |
| ENSG00000187605 | UCACAGG  |
| ENSG00000187605 | UCACAGU  |
| ENSG00000187605 | UCACCAC  |
| ENSG00000187605 | UCAUUUG  |
| ENSG00000187605 | UCCACA   |
| ENSG00000187605 | UCCUAUA  |
| ENSG00000187605 | UCUCCAA  |
| ENSG00000187605 | UCUUGAG  |
| ENSG00000187605 | UGAAAGG  |
| ENSG00000187605 | UGCAAAG  |
| ENSG00000187605 | UGCAUAG  |
| ENSG00000187605 | UGGCCAC  |
| ENSG00000187605 | UGGGUAC  |
| ENSG00000187605 | UUCAAAU  |
| ENSG00000187605 | UUCAAGC  |
| ENSG00000187605 | UUCCUAG  |
| ENSG00000187605 | UUGAGGC  |
| ENSG00000187605 | UUGGUCC  |
| ENSG00000187605 | UUGUGUC  |
| ENSG00000187605 | UUUCAAC  |
| ENSG00000187634 | GACCCUG  |
| ENSG00000187650 | AAAGAGG  |
| ENSG00000187650 | CAGACAG  |
| ENSG00000187653 | ACUGCAU  |
| ENSG00000187653 | AGUAGUU  |
| ENSG00000187653 | CAGUAGA  |
| ENSG00000187653 | CAGUGCA  |
| ENSG00000187653 | CUUACAG  |
| ENSG00000187664 | ACAGGUG  |
| ENSG00000187664 | GGGGUCC  |
| ENSG00000187664 | GGUUACC  |

|                 |         |
|-----------------|---------|
| ENSG00000187664 | UCCAUA  |
| ENSG00000187672 | AAAACUG |
| ENSG00000187672 | AACCUGG |
| ENSG00000187672 | ACACACC |
| ENSG00000187672 | AGCAGCA |
| ENSG00000187672 | CAAAACU |
| ENSG00000187672 | CUUUGGU |
| ENSG00000187672 | UCACAGU |
| ENSG00000187672 | UCAUACA |
| ENSG00000187672 | UGUGCUU |
| ENSG00000187672 | UUGGCAC |
| ENSG00000187676 | AAGGCAC |
| ENSG00000187676 | GUUAAUG |
| ENSG00000187678 | AAAAACC |
| ENSG00000187678 | AAAGUGC |
| ENSG00000187678 | AACACUG |
| ENSG00000187678 | AACCUGU |
| ENSG00000187678 | AAGAACC |
| ENSG00000187678 | AAGUGCA |
| ENSG00000187678 | ACCACAG |
| ENSG00000187678 | AGCACCA |
| ENSG00000187678 | AGCAGCA |
| ENSG00000187678 | AGCCCUU |
| ENSG00000187678 | AGUGGUU |
| ENSG00000187678 | AUACAAG |
| ENSG00000187678 | CAAAGUG |
| ENSG00000187678 | CUUACAG |
| ENSG00000187678 | GCUAGCA |
| ENSG00000187678 | GGCAAGA |
| ENSG00000187678 | GGUUACC |
| ENSG00000187678 | UAUGGUU |
| ENSG00000187678 | UCACAAG |
| ENSG00000187678 | UCCAGAG |
| ENSG00000187678 | UCUGGAA |
| ENSG00000187678 | UGAGAAG |
| ENSG00000187678 | UUGGCAA |
| ENSG00000187678 | UUGGUCC |
| ENSG00000187678 | UUUGCAA |
| ENSG00000187678 | UUUGCAC |
| ENSG00000187689 | AAAUUUC |
| ENSG00000187714 | GGAGGAG |
| ENSG00000187714 | UUGGCAC |
| ENSG00000187715 | AUAAAGU |
| ENSG00000187720 | AAAGUUA |
| ENSG00000187720 | AGCACCA |
| ENSG00000187720 | AUCCUUG |
| ENSG00000187720 | AUCCUUU |
| ENSG00000187720 | CCUUCUU |
| ENSG00000187720 | UGUCUUU |
| ENSG00000187720 | UCCUAG  |
| ENSG00000187735 | AAAGCUG |
| ENSG00000187735 | GCAGGAC |
| ENSG00000187735 | GUCCAGA |
| ENSG00000187736 | GGGGUGG |
| ENSG00000187736 | GUCUUGC |
| ENSG00000187742 | ACAUUCA |
| ENSG00000187764 | AUCCCUU |
| ENSG00000187764 | UAUAAAG |
| ENSG00000187764 | UGAGAAU |
| ENSG00000187764 | UGGCUGC |
| ENSG00000187772 | AAGGCAC |
| ENSG00000187772 | AAUCUCA |
| ENSG00000187772 | AGGUAGU |
| ENSG00000187772 | AUCAUU  |

|                 |          |
|-----------------|----------|
| ENSG00000187772 | CAGUAGU  |
| ENSG00000187772 | CAGUGCA  |
| ENSG00000187772 | CCCUGAG  |
| ENSG00000187772 | GGUAGAC  |
| ENSG00000187772 | UCCUGU   |
| ENSG00000187772 | UCCUGAG  |
| ENSG00000187772 | UGAAAUG  |
| ENSG00000187772 | UUGGUCC  |
| ENSG00000187778 | CCAGGAG  |
| ENSG00000187778 | GGCAGGG  |
| ENSG00000187778 | UACAAAG  |
| ENSG00000187792 | AAAGUGC  |
| ENSG00000187792 | AGGGAGG  |
| ENSG00000187792 | GGUUGUC  |
| ENSG00000187800 | GAGGCUG  |
| ENSG00000187800 | GGCAGGG  |
| ENSG00000187823 | GCUACAU  |
| ENSG00000187823 | GGAUUUU  |
| ENSG00000187824 | UUGGUCC  |
| ENSG00000187837 | AAAGAGC  |
| ENSG00000187838 | AAAGUUU  |
| ENSG00000187838 | AGCACCA  |
| ENSG00000187838 | CACCAGC  |
| ENSG00000187838 | CUUUGGU  |
| ENSG00000187840 | CCCUGAG  |
| ENSG00000187840 | GAGGUAU  |
| ENSG00000187840 | GGAGGCA  |
| ENSG00000187840 | UGCCUG   |
| ENSG00000187840 | UCCUCG   |
| ENSG00000187855 | UCCAGUU  |
| ENSG00000187866 | AAGGCAC  |
| ENSG00000187866 | ACACACU  |
| ENSG00000187866 | AGCAGCA  |
| ENSG00000187866 | AGCAGCU  |
| ENSG00000187866 | AGUGUGC  |
| ENSG00000187866 | GGCAAGA  |
| ENSG00000187866 | GGGUAAG  |
| ENSG00000187866 | UCAACAG  |
| ENSG00000187889 | GGCUCAG  |
| ENSG00000187939 | GGCUCUG  |
| ENSG00000187942 | CGGUGCU  |
| ENSG00000187957 | AACUCUA  |
| ENSG00000187961 | AAGGCAC  |
| ENSG00000187961 | AUGUGGG  |
| ENSG00000187961 | UAUUGCU  |
| ENSG00000187969 | AUAAUAC  |
| ENSG00000187969 | UCCUCG   |
| ENSG00000187990 | AAAGAGC  |
| ENSG00000188001 | ACAAUUAU |
| ENSG00000188001 | CUGUUGA  |
| ENSG00000188001 | UACAGUU  |
| ENSG00000188001 | UCAACAG  |
| ENSG00000188001 | UCAUUCG  |
| ENSG00000188001 | UCUUGAG  |
| ENSG00000188001 | UUGAGGC  |
| ENSG00000188015 | UGAAAGG  |
| ENSG00000188021 | AAGUCAC  |
| ENSG00000188026 | AAGGCAC  |
| ENSG00000188026 | CUGCAGG  |
| ENSG00000188026 | GAGAAGA  |
| ENSG00000188026 | UCCUUGC  |
| ENSG00000188042 | AAACUGU  |
| ENSG00000188042 | AAAGUGC  |
| ENSG00000188042 | AAGUGCU  |

|                 |          |
|-----------------|----------|
| ENSG00000188042 | ACCACAG  |
| ENSG00000188042 | ACUGUGU  |
| ENSG00000188042 | AGUGCUU  |
| ENSG00000188042 | AGUGUGC  |
| ENSG00000188042 | CACAGGG  |
| ENSG00000188042 | CACCACC  |
| ENSG00000188042 | CAGCUGG  |
| ENSG00000188042 | CUACAAA  |
| ENSG00000188042 | CUGGAAA  |
| ENSG00000188042 | CUUUGGU  |
| ENSG00000188042 | GCCUGU   |
| ENSG00000188042 | GCGGGGC  |
| ENSG00000188042 | GCUGGUG  |
| ENSG00000188042 | GGAAGAC  |
| ENSG00000188042 | GGCCUG   |
| ENSG00000188042 | GGCGGGG  |
| ENSG00000188042 | GUAAACA  |
| ENSG00000188042 | UCAACAG  |
| ENSG00000188042 | UCAAGUA  |
| ENSG00000188042 | UCACAGU  |
| ENSG00000188042 | UCCUUU   |
| ENSG00000188042 | UCUGGAA  |
| ENSG00000188042 | UGCCUG   |
| ENSG00000188042 | UUCAAGC  |
| ENSG00000188042 | UUGGCAA  |
| ENSG00000188042 | UUGGCAC  |
| ENSG00000188042 | UUGGUUC  |
| ENSG00000188042 | UUGUUCG  |
| ENSG00000188120 | GAUUGGU  |
| ENSG00000188120 | UCUUGAG  |
| ENSG00000188130 | CUACAAA  |
| ENSG00000188133 | CUACAAA  |
| ENSG00000188133 | UUCUAAU  |
| ENSG00000188153 | ACAAUAU  |
| ENSG00000188153 | ACUGCAG  |
| ENSG00000188153 | GAGGUAG  |
| ENSG00000188153 | GAGGUAU  |
| ENSG00000188153 | GCACCAU  |
| ENSG00000188157 | AAGUCAC  |
| ENSG00000188157 | ACAGUAU  |
| ENSG00000188157 | AGGGAGG  |
| ENSG00000188157 | CACAGUG  |
| ENSG00000188157 | UACAAAG  |
| ENSG00000188157 | UCACAGU  |
| ENSG00000188158 | AAAGUGC  |
| ENSG00000188158 | AACUGGU  |
| ENSG00000188158 | ACACACC  |
| ENSG00000188158 | AGUGCAA  |
| ENSG00000188158 | CCAGCAU  |
| ENSG00000188158 | GUGACUG  |
| ENSG00000188158 | GUGCAA   |
| ENSG00000188158 | UAUCAGA  |
| ENSG00000188158 | UUGGCAA  |
| ENSG00000188176 | UAUAAAG  |
| ENSG00000188177 | AGCAGCA  |
| ENSG00000188177 | AGCAGCG  |
| ENSG00000188177 | AUAU AAC |
| ENSG00000188177 | AUGACAC  |
| ENSG00000188177 | CUACAGU  |
| ENSG00000188177 | GGCAAGA  |
| ENSG00000188177 | GUCACUC  |
| ENSG00000188177 | UCACAUU  |
| ENSG00000188177 | UCCUCU   |
| ENSG00000188177 | UUCAAAU  |

|                 |          |
|-----------------|----------|
| ENSG00000188177 | UUGGCAC  |
| ENSG00000188215 | AAAACUG  |
| ENSG00000188215 | AAAAGUA  |
| ENSG00000188215 | AAAGUAA  |
| ENSG00000188215 | AAAGUAC  |
| ENSG00000188215 | AAAGUGC  |
| ENSG00000188215 | ACAAGGU  |
| ENSG00000188215 | ACACACC  |
| ENSG00000188215 | ACACACU  |
| ENSG00000188215 | ACAGUAC  |
| ENSG00000188215 | AGCAAAA  |
| ENSG00000188215 | AGCCCUU  |
| ENSG00000188215 | AGCUUUAU |
| ENSG00000188215 | AGUGGUU  |
| ENSG00000188215 | CAAAACU  |
| ENSG00000188215 | CAGCAA   |
| ENSG00000188215 | CCAGCAU  |
| ENSG00000188215 | GAAGGAA  |
| ENSG00000188215 | GAGCCCU  |
| ENSG00000188215 | GAGGUAG  |
| ENSG00000188215 | GAGGUAU  |
| ENSG00000188215 | GCCUGU   |
| ENSG00000188215 | GUCUACU  |
| ENSG00000188215 | GUGCAA   |
| ENSG00000188215 | GUUAAUG  |
| ENSG00000188215 | UAAUGCU  |
| ENSG00000188215 | UGACUGU  |
| ENSG00000188215 | UGCCAGC  |
| ENSG00000188215 | UGCCUG   |
| ENSG00000188215 | UUAGAGA  |
| ENSG00000188215 | UUCAAGC  |
| ENSG00000188227 | GAAACAU  |
| ENSG00000188227 | UGCAUUAU |
| ENSG00000188312 | AAAUUUC  |
| ENSG00000188312 | AAUUGCU  |
| ENSG00000188312 | AGUGUGC  |
| ENSG00000188312 | GAUUGUC  |
| ENSG00000188312 | GGCAUUG  |
| ENSG00000188312 | GGGUCC   |
| ENSG00000188312 | GUAACAG  |
| ENSG00000188312 | GUGCCAC  |
| ENSG00000188312 | UGAGAAG  |
| ENSG00000188312 | UGCUGAC  |
| ENSG00000188312 | UUCUAAU  |
| ENSG00000188312 | UUGCAA   |
| ENSG00000188312 | UUGGCAC  |
| ENSG00000188312 | UUGUGAC  |
| ENSG00000188315 | AAAACUG  |
| ENSG00000188315 | AGGCAGG  |
| ENSG00000188315 | GAAACAU  |
| ENSG00000188315 | UUCAAAU  |
| ENSG00000188322 | AAACUGU  |
| ENSG00000188322 | AAGGCAC  |
| ENSG00000188322 | AGCCCUU  |
| ENSG00000188322 | AUUGCAC  |
| ENSG00000188322 | GAGGUAG  |
| ENSG00000188322 | GAGGUUAU |
| ENSG00000188322 | GCAGGAC  |
| ENSG00000188322 | GGCAGGG  |
| ENSG00000188322 | GGUGGGC  |
| ENSG00000188322 | GUAAACA  |
| ENSG00000188322 | GUCUACU  |
| ENSG00000188322 | UACAAAG  |
| ENSG00000188322 | UAUUGCU  |

|                 |          |
|-----------------|----------|
| ENSG00000188338 | CUGGGCA  |
| ENSG00000188338 | GGAAUGU  |
| ENSG00000188386 | UGGGUGA  |
| ENSG00000188419 | AACUCUA  |
| ENSG00000188419 | AGGUUAU  |
| ENSG00000188419 | GUAUUCU  |
| ENSG00000188419 | UUGGUUC  |
| ENSG00000188428 | AAUCACU  |
| ENSG00000188428 | GAGGUAG  |
| ENSG00000188428 | GAGGUAU  |
| ENSG00000188428 | UCACAGU  |
| ENSG00000188428 | UCACAUU  |
| ENSG00000188428 | UUGACAC  |
| ENSG00000188483 | AAAUUUC  |
| ENSG00000188483 | ACCCGGC  |
| ENSG00000188483 | AUAAAGU  |
| ENSG00000188483 | AUGCACC  |
| ENSG00000188483 | CAGGUGA  |
| ENSG00000188483 | GACAACU  |
| ENSG00000188483 | GCUGGUG  |
| ENSG00000188483 | GGAGGAG  |
| ENSG00000188483 | UCCCUUU  |
| ENSG00000188483 | UGUCUGG  |
| ENSG00000188483 | UUCUGCA  |
| ENSG00000188483 | UUGGCAA  |
| ENSG00000188486 | CAGUCCA  |
| ENSG00000188486 | GCCCUUA  |
| ENSG00000188486 | GGCCUG   |
| ENSG00000188486 | GUGGCC   |
| ENSG00000188486 | UGGCCU   |
| ENSG00000188487 | GGCAAGA  |
| ENSG00000188487 | UCAACAG  |
| ENSG00000188488 | GCUUCCU  |
| ENSG00000188488 | GUCCAGA  |
| ENSG00000188488 | UCCAGAG  |
| ENSG00000188542 | UCUCCAA  |
| ENSG00000188549 | CAGGAAC  |
| ENSG00000188549 | GACCUGG  |
| ENSG00000188549 | GAGGCUG  |
| ENSG00000188549 | GCGGAGG  |
| ENSG00000188549 | GGAAGCC  |
| ENSG00000188549 | GUGCCUG  |
| ENSG00000188549 | UCAUUUG  |
| ENSG00000188549 | UGUGCGG  |
| ENSG00000188549 | UGUGCGU  |
| ENSG00000188549 | UGUUGAA  |
| ENSG00000188554 | AGCAGCA  |
| ENSG00000188554 | AUACAAG  |
| ENSG00000188554 | CAGCAGG  |
| ENSG00000188554 | UAAUACA  |
| ENSG00000188580 | CUGUUGA  |
| ENSG00000188580 | GAGGAUA  |
| ENSG00000188580 | GUAAACA  |
| ENSG00000188580 | UGACCUA  |
| ENSG00000188580 | UUCCUAG  |
| ENSG00000188582 | AAGGCAC  |
| ENSG00000188582 | AGCAGCU  |
| ENSG00000188582 | AUAUUUAU |
| ENSG00000188582 | AUGCAUU  |
| ENSG00000188582 | CACUGUU  |
| ENSG00000188582 | CCAGUGC  |
| ENSG00000188582 | CCAGUGU  |
| ENSG00000188582 | UCACAGG  |
| ENSG00000188582 | UCACAUU  |

|                 |          |
|-----------------|----------|
| ENSG00000188582 | UCCAGUU  |
| ENSG00000188612 | ACUGGAU  |
| ENSG00000188612 | AGCAAAA  |
| ENSG00000188612 | AGGAUGU  |
| ENSG00000188612 | CAGUUAC  |
| ENSG00000188613 | ACAGUAC  |
| ENSG00000188613 | ACAGUAU  |
| ENSG00000188613 | ACUGUAG  |
| ENSG00000188613 | AGCAAAA  |
| ENSG00000188613 | AGCACCA  |
| ENSG00000188613 | AGUGCCU  |
| ENSG00000188613 | CUAGUAA  |
| ENSG00000188613 | CUCCAUI  |
| ENSG00000188613 | GCACCAU  |
| ENSG00000188613 | GUUUUCU  |
| ENSG00000188636 | AGCACCA  |
| ENSG00000188636 | CAGCAGG  |
| ENSG00000188636 | GCACCAU  |
| ENSG00000188636 | GCUGGUG  |
| ENSG00000188636 | GGCAUUG  |
| ENSG00000188636 | UACAAAAG |
| ENSG00000188636 | UCAUUUG  |
| ENSG00000188636 | UCCCACC  |
| ENSG00000188636 | UGGCUGC  |
| ENSG00000188636 | UUGGCAA  |
| ENSG00000188636 | UUGGCAC  |
| ENSG00000188647 | AAGGCAC  |
| ENSG00000188647 | ACACACU  |
| ENSG00000188647 | AUCCUUU  |
| ENSG00000188647 | AUGAUGC  |
| ENSG00000188647 | CCUGAG   |
| ENSG00000188647 | CUUGGAG  |
| ENSG00000188647 | GAGAAAU  |
| ENSG00000188647 | GAGGCAG  |
| ENSG00000188647 | GGAAUGU  |
| ENSG00000188647 | GUGAAUG  |
| ENSG00000188647 | UGUGCUU  |
| ENSG00000188687 | AAAGUAA  |
| ENSG00000188687 | AAAGUAC  |
| ENSG00000188687 | AAGUGCA  |
| ENSG00000188687 | ACUGGCU  |
| ENSG00000188687 | AUGCCUU  |
| ENSG00000188687 | CAGGUGA  |
| ENSG00000188687 | GAAGGAA  |
| ENSG00000188687 | GCACCAU  |
| ENSG00000188687 | GGGUGGU  |
| ENSG00000188687 | GGUGGUC  |
| ENSG00000188687 | UCCAGUU  |
| ENSG00000188706 | AAAGUGC  |
| ENSG00000188706 | AAGUGCA  |
| ENSG00000188706 | AAGUGCU  |
| ENSG00000188706 | CAAAGUG  |
| ENSG00000188706 | CCUGAG   |
| ENSG00000188706 | CUCUUCC  |
| ENSG00000188706 | CUGGACU  |
| ENSG00000188706 | GGUUACC  |
| ENSG00000188706 | UCCCUGU  |
| ENSG00000188725 | AAAGCUG  |
| ENSG00000188725 | UCCAGUU  |
| ENSG00000188760 | CCUGAG   |
| ENSG00000188760 | GCUGGUG  |
| ENSG00000188760 | UAUAAAAG |
| ENSG00000188760 | UUGGCAA  |
| ENSG00000188761 | AGAUGUG  |



|                 |         |
|-----------------|---------|
| ENSG00000188761 | CCAGCAU |
| ENSG00000188761 | UUAGAGA |
| ENSG00000188761 | UUCAAAU |
| ENSG00000188763 | ACAUCAC |
| ENSG00000188763 | CAGCUGG |
| ENSG00000188763 | GGGUUUA |
| ENSG00000188763 | UCCAGUU |
| ENSG00000188778 | AAGACAU |
| ENSG00000188778 | GAGGUAG |
| ENSG00000188778 | GAGGUAU |
| ENSG00000188778 | GUGAGGU |
| ENSG00000188778 | UCUGGAG |
| ENSG00000188783 | AGCACCA |
| ENSG00000188783 | CACCAGC |
| ENSG00000188783 | GCAGGAC |
| ENSG00000188783 | GGCGGGG |
| ENSG00000188783 | UCAAGUA |
| ENSG00000188783 | UCUAGAG |
| ENSG00000188783 | UGAAAUG |
| ENSG00000188783 | UGUCUUU |
| ENSG00000188786 | AAAGUAA |
| ENSG00000188786 | AACAGUC |
| ENSG00000188786 | AACAUUC |
| ENSG00000188786 | AACCUGU |
| ENSG00000188786 | AAGGCAC |
| ENSG00000188786 | AAGGUGC |
| ENSG00000188786 | AAGUGCA |
| ENSG00000188786 | AAUGCCC |
| ENSG00000188786 | ACAUUCA |
| ENSG00000188786 | ACCCUGU |
| ENSG00000188786 | ACUGCAU |
| ENSG00000188786 | AGUACUG |
| ENSG00000188786 | AGUGCAA |
| ENSG00000188786 | AUACAAG |
| ENSG00000188786 | CACACCG |
| ENSG00000188786 | CACACCU |
| ENSG00000188786 | CAGGCUC |
| ENSG00000188786 | CCAGUGC |
| ENSG00000188786 | CCUUCAU |
| ENSG00000188786 | CUCAGGG |
| ENSG00000188786 | CUGCUCA |
| ENSG00000188786 | CUGGACU |
| ENSG00000188786 | GAAACAU |
| ENSG00000188786 | GACCCUG |
| ENSG00000188786 | GAUUGGU |
| ENSG00000188786 | GCACCAU |
| ENSG00000188786 | GCAGCAU |
| ENSG00000188786 | UAAUAGU |
| ENSG00000188786 | UACAAAG |
| ENSG00000188786 | UGAGAAG |
| ENSG00000188786 | UGCAGCU |
| ENSG00000188786 | UGCAUAG |
| ENSG00000188786 | UGCAUAU |
| ENSG00000188786 | UGGGACA |
| ENSG00000188786 | UUCUGCA |
| ENSG00000188786 | UUGGCAC |
| ENSG00000188786 | UUUCAAC |
| ENSG00000188786 | UUUGCAC |
| ENSG00000188800 | GGAGUCC |
| ENSG00000188807 | GGCUCUG |
| ENSG00000188807 | GGUUACC |
| ENSG00000188807 | UCACACA |
| ENSG00000188811 | AAGUGCU |
| ENSG00000188811 | AGUGCUU |

|                 |         |
|-----------------|---------|
| ENSG00000188811 | UUGGCAA |
| ENSG00000188816 | AAAAAUC |
| ENSG00000188827 | GCUGGUG |
| ENSG00000188827 | UAUUGCU |
| ENSG00000188906 | GUGCAAA |
| ENSG00000188906 | UUCAAAU |
| ENSG00000188984 | UCUCCAA |
| ENSG00000188987 | UGGCCCU |
| ENSG00000188994 | AAGGCAC |
| ENSG00000188994 | ACAUUCA |
| ENSG00000188994 | AUACAAG |
| ENSG00000188994 | AUGGCAC |
| ENSG00000188994 | AUGGCUU |
| ENSG00000188994 | CUAUACA |
| ENSG00000188994 | CUUACAG |
| ENSG00000188994 | GCUGGUG |
| ENSG00000188994 | GCUUCCU |
| ENSG00000188994 | GGCAGCG |
| ENSG00000188994 | GUCAUUG |
| ENSG00000188994 | GUGUCAC |
| ENSG00000188994 | GUUCAUG |
| ENSG00000188994 | UACAAAG |
| ENSG00000188994 | UAGACUG |
| ENSG00000188994 | UCACCAC |
| ENSG00000188994 | UCCUAUA |
| ENSG00000188994 | UGUAUAA |
| ENSG00000188994 | UCCAUA  |
| ENSG00000188994 | UUUUUGC |
| ENSG00000188997 | AAGUCAC |
| ENSG00000188997 | AGGGUUG |
| ENSG00000188997 | AGGUAGU |
| ENSG00000188997 | CCCUGAG |
| ENSG00000188997 | CCUGCUG |
| ENSG00000188997 | GAGGUAU |
| ENSG00000188997 | GCCCUGU |
| ENSG00000188997 | UGAUCCA |
| ENSG00000188997 | UUGAUCA |
| ENSG00000189007 | AAGGUGC |
| ENSG00000189007 | CAAAACU |
| ENSG00000189007 | CAAAGCA |
| ENSG00000189007 | CAAAGUC |
| ENSG00000189007 | CCUUCUG |
| ENSG00000189007 | CUCCAUA |
| ENSG00000189007 | GCCUGGA |
| ENSG00000189007 | GGCAGUG |
| ENSG00000189007 | GUCUCUG |
| ENSG00000189007 | UAUCAGA |
| ENSG00000189007 | UGAGAAG |
| ENSG00000189007 | UGCAUAU |
| ENSG00000189007 | UUGGCAA |
| ENSG00000189007 | UUGGCAC |
| ENSG00000189007 | UUGUUCG |
| ENSG00000189043 | CCUUCAU |
| ENSG00000189043 | UGUGCGU |
| ENSG00000189050 | AAAAAUC |
| ENSG00000189056 | CACUGUU |
| ENSG00000189056 | GUGCUUG |
| ENSG00000189060 | GUCUCUG |
| ENSG00000189067 | AAAGUAC |
| ENSG00000189067 | AAAGUGC |
| ENSG00000189067 | AAGGCAC |
| ENSG00000189067 | AGCAGCA |
| ENSG00000189067 | UCACAGU |
| ENSG00000189079 | AAAACUG |

|                 |         |
|-----------------|---------|
| ENSG00000189079 | AAAAGUA |
| ENSG00000189079 | AAAUGGU |
| ENSG00000189079 | AAAUUUC |
| ENSG00000189079 | AACCUGU |
| ENSG00000189079 | ACAAGGU |
| ENSG00000189079 | ACAGUAC |
| ENSG00000189079 | ACAUUCA |
| ENSG00000189079 | ACCACAG |
| ENSG00000189079 | ACUGUUU |
| ENSG00000189079 | AGCAAAA |
| ENSG00000189079 | AGUAACA |
| ENSG00000189079 | CAAAACU |
| ENSG00000189079 | CACAGUG |
| ENSG00000189079 | CAGCAGA |
| ENSG00000189079 | CAGUCUG |
| ENSG00000189079 | CCAGUGC |
| ENSG00000189079 | CCAGUGU |
| ENSG00000189079 | CUACAAA |
| ENSG00000189079 | GGAAUGU |
| ENSG00000189079 | GGAGGAG |
| ENSG00000189079 | GGCUCAG |
| ENSG00000189079 | GGCUGCG |
| ENSG00000189079 | GGUGGUU |
| ENSG00000189079 | UAAGACG |
| ENSG00000189079 | UACAAAG |
| ENSG00000189079 | UACAGUU |
| ENSG00000189079 | UAUAAUA |
| ENSG00000189079 | UCAAGUA |
| ENSG00000189079 | UCACAAG |
| ENSG00000189079 | UCACAGU |
| ENSG00000189079 | UCCAGUU |
| ENSG00000189079 | UGAAAGG |
| ENSG00000189079 | UGAAAUG |
| ENSG00000189079 | UGGCUGC |
| ENSG00000189079 | UCCAUA  |
| ENSG00000189079 | UUCUAAU |
| ENSG00000189091 | AAAAGUA |
| ENSG00000189091 | AACAUUC |
| ENSG00000189091 | AGUAGAC |
| ENSG00000189120 | CAGGCUC |
| ENSG00000189120 | CAGUAGA |
| ENSG00000189120 | CCAGCAU |
| ENSG00000189120 | GGCUCAG |
| ENSG00000189120 | UCACAGG |
| ENSG00000189120 | UCACAGU |
| ENSG00000189120 | UCCCUUU |
| ENSG00000189120 | UGAAAGG |
| ENSG00000189143 | UACAAAG |
| ENSG00000189159 | AAAGUGC |
| ENSG00000189159 | AACAGUC |
| ENSG00000189159 | AAGUGCU |
| ENSG00000189159 | ACCAGCA |
| ENSG00000189159 | AGCACCA |
| ENSG00000189159 | AGUGCUU |
| ENSG00000189159 | AUAAAGU |
| ENSG00000189159 | CACCAGC |
| ENSG00000189159 | CAGUCCA |
| ENSG00000189159 | CCAGCAU |
| ENSG00000189159 | GAAAACA |
| ENSG00000189182 | CCAGCAU |
| ENSG00000189184 | AAUCACU |
| ENSG00000189184 | ACAGUAC |
| ENSG00000189184 | GCAACUU |
| ENSG00000189184 | UAAUAUC |

|                 |         |
|-----------------|---------|
| ENSG00000189212 | ACAUUCA |
| ENSG00000189221 | CUGCUC  |
| ENSG00000189221 | GAGGCAG |
| ENSG00000189241 | CCAGCAU |
| ENSG00000189266 | AGCAGCA |
| ENSG00000189266 | AGCAGCG |
| ENSG00000189266 | CUUUGGU |
| ENSG00000189266 | GCUACAU |
| ENSG00000189266 | GGCUCUG |
| ENSG00000189292 | AAGGCAC |
| ENSG00000189292 | AAUCUCU |
| ENSG00000189292 | CAUAUUG |
| ENSG00000189298 | AAGGCAC |
| ENSG00000189308 | AAAGUUU |
| ENSG00000189308 | AACGGAA |
| ENSG00000189308 | AAGGUGC |
| ENSG00000189308 | ACAAUUA |
| ENSG00000189308 | ACACACU |
| ENSG00000189308 | ACAUCAC |
| ENSG00000189308 | ACUAGAU |
| ENSG00000189308 | ACUGCAG |
| ENSG00000189308 | ACUGCAU |
| ENSG00000189308 | AUACAAG |
| ENSG00000189308 | AUCAUAC |
| ENSG00000189308 | AUUGCAC |
| ENSG00000189308 | CAAUUGC |
| ENSG00000189308 | CAGCAAA |
| ENSG00000189308 | CUACAAA |
| ENSG00000189308 | CUAGUAG |
| ENSG00000189308 | GAGCUAA |
| ENSG00000189308 | GUGCAAA |
| ENSG00000189308 | GUUAGGA |
| ENSG00000189308 | GUUCAUG |
| ENSG00000189308 | UAAUACA |
| ENSG00000189308 | UGGGAUC |
| ENSG00000189308 | UUCUGCA |
| ENSG00000189319 | AAAGUAA |
| ENSG00000189319 | AAAUGGU |
| ENSG00000189319 | AAGGCAC |
| ENSG00000189319 | AGUAACA |
| ENSG00000189319 | AGUGCAA |
| ENSG00000189319 | CUACAAA |
| ENSG00000189319 | GACCUGG |
| ENSG00000189319 | GAGACCU |
| ENSG00000189319 | GCAGAAG |
| ENSG00000189319 | GGAGAGA |
| ENSG00000189319 | GGCAAGA |
| ENSG00000189319 | UGAGAAU |
| ENSG00000189319 | UGUCUGC |
| ENSG00000189325 | CAGUGCA |
| ENSG00000189325 | CCAGCAU |
| ENSG00000189325 | UGCCAGC |
| ENSG00000189334 | AAUGCCC |
| ENSG00000189334 | CAAUUGC |
| ENSG00000189337 | GAGGCUG |
| ENSG00000189337 | GGGUGUU |
| ENSG00000189337 | GUUAAUG |
| ENSG00000189337 | UCCUGAG |
| ENSG00000189369 | AAAGCUG |
| ENSG00000189369 | ACAGUAU |
| ENSG00000189369 | GAGAAAU |
| ENSG00000189369 | UCACAGU |
| ENSG00000189369 | UUCAAAU |
| ENSG00000189377 | GGGUAAG |

|                 |          |
|-----------------|----------|
| ENSG00000189403 | AAAAACC  |
| ENSG00000189403 | AAGAACC  |
| ENSG00000189403 | ACUGUAG  |
| ENSG00000189403 | AGCAAAA  |
| ENSG00000189403 | AGCAUUC  |
| ENSG00000189403 | AGUGUGC  |
| ENSG00000189403 | AUACAAG  |
| ENSG00000189403 | CAA AUGC |
| ENSG00000189403 | CCAGGAG  |
| ENSG00000189403 | CUUACAG  |
| ENSG00000189403 | GACAACU  |
| ENSG00000189403 | GAGUUGA  |
| ENSG00000189403 | GAGUUGG  |
| ENSG00000189403 | GCACCAU  |
| ENSG00000189403 | GUAGUGU  |
| ENSG00000189403 | UAUAUGA  |
| ENSG00000189403 | UGUGCUU  |
| ENSG00000189403 | UCCCAUA  |
| ENSG00000189410 | AAGGCAC  |
| ENSG00000189410 | AGUGCUU  |
| ENSG00000189410 | CUCAGGG  |
| ENSG00000189410 | GGAAGAC  |
| ENSG00000189410 | UCAAGUA  |
| ENSG00000189410 | UUCAAGC  |
| ENSG00000196072 | AAAGUAA  |
| ENSG00000196072 | UCCAGUU  |
| ENSG00000196083 | AAAGUGC  |
| ENSG00000196083 | AAGUGCA  |
| ENSG00000196083 | AGUGCAA  |
| ENSG00000196083 | CAA AUGC |
| ENSG00000196083 | GACCAUG  |
| ENSG00000196083 | GAGAUGA  |
| ENSG00000196083 | GCACCAU  |
| ENSG00000196083 | GGUUUAC  |
| ENSG00000196083 | UACAAAG  |
| ENSG00000196083 | UGCAAAG  |
| ENSG00000196090 | AAACUGU  |
| ENSG00000196090 | AAAUUUC  |
| ENSG00000196090 | AAGUGCA  |
| ENSG00000196090 | AAUCUCA  |
| ENSG00000196090 | AAUUGCU  |
| ENSG00000196090 | AGUGCUG  |
| ENSG00000196090 | AUGGCUU  |
| ENSG00000196090 | CACUGUU  |
| ENSG00000196090 | CAGCAGA  |
| ENSG00000196090 | GAAAACA  |
| ENSG00000196090 | GAAUUGU  |
| ENSG00000196090 | GGGGAGC  |
| ENSG00000196090 | GGGGUGG  |
| ENSG00000196090 | GUGCUUG  |
| ENSG00000196090 | UCACAGG  |
| ENSG00000196090 | UCACAGU  |
| ENSG00000196090 | UCCACA   |
| ENSG00000196090 | UCUGGAG  |
| ENSG00000196090 | UGACCUA  |
| ENSG00000196090 | UGUGCUU  |
| ENSG00000196090 | UUGAUCA  |
| ENSG00000196090 | UUGGUCC  |
| ENSG00000196092 | CUGGGGG  |
| ENSG00000196092 | GGGGUCC  |
| ENSG00000196092 | UCUCCAA  |
| ENSG00000196104 | AAGGCAC  |
| ENSG00000196104 | AGCAGCA  |
| ENSG00000196104 | UUUGCAA  |

|                 |         |
|-----------------|---------|
| ENSG00000196132 | AAAGAAU |
| ENSG00000196132 | AACAAAC |
| ENSG00000196132 | AAGUGCA |
| ENSG00000196132 | AAUACUG |
| ENSG00000196132 | ACAGUAU |
| ENSG00000196132 | AGUGCAA |
| ENSG00000196132 | AUAUAAC |
| ENSG00000196132 | CACAAUG |
| ENSG00000196132 | CACAGUG |
| ENSG00000196132 | CCAGGAG |
| ENSG00000196132 | GAGAACU |
| ENSG00000196132 | UCACAGU |
| ENSG00000196132 | UCCUGU  |
| ENSG00000196132 | UCCUGAG |
| ENSG00000196132 | UGCAAAG |
| ENSG00000196150 | AAAGAGG |
| ENSG00000196155 | GCUGGAU |
| ENSG00000196155 | UAUAAAG |
| ENSG00000196169 | GGAUUUU |
| ENSG00000196169 | UUGGCAA |
| ENSG00000196169 | UUGGCAC |
| ENSG00000196176 | GGCCUG  |
| ENSG00000196177 | AAAUUUC |
| ENSG00000196177 | AAUCCUU |
| ENSG00000196177 | AGGGAGG |
| ENSG00000196177 | AUGACAC |
| ENSG00000196177 | GUGCAA  |
| ENSG00000196177 | UGAAAGG |
| ENSG00000196177 | UGACAUC |
| ENSG00000196177 | UUGGCAA |
| ENSG00000196177 | UUGGCAC |
| ENSG00000196182 | AGCUUAU |
| ENSG00000196182 | AUACAAG |
| ENSG00000196182 | CACAGUG |
| ENSG00000196182 | CAGUCCA |
| ENSG00000196182 | CUCACAC |
| ENSG00000196182 | GACCUGG |
| ENSG00000196182 | GAGCCCU |
| ENSG00000196182 | GAGGCAG |
| ENSG00000196182 | GAGGUAG |
| ENSG00000196182 | GCAGGAC |
| ENSG00000196182 | GGCAAGA |
| ENSG00000196182 | GUCACUC |
| ENSG00000196182 | GUCCAGA |
| ENSG00000196182 | GUGACUG |
| ENSG00000196182 | UCACAGU |
| ENSG00000196182 | UCCAGAG |
| ENSG00000196182 | UCUCAAG |
| ENSG00000196182 | UGGUACC |
| ENSG00000196182 | UUUUUGC |
| ENSG00000196187 | GGAGGCA |
| ENSG00000196188 | GGAGAGA |
| ENSG00000196189 | GGCUCAG |
| ENSG00000196199 | AAAUUUC |
| ENSG00000196199 | AAUUUUA |
| ENSG00000196199 | CAGUCUG |
| ENSG00000196199 | CUAGUAG |
| ENSG00000196199 | CUGGACU |
| ENSG00000196199 | GGUUUAC |
| ENSG00000196208 | AGUGCUU |
| ENSG00000196208 | AUACAAG |
| ENSG00000196208 | AUGCCUU |
| ENSG00000196208 | CUUUGGU |
| ENSG00000196208 | GAGGUAG |

|                 |         |
|-----------------|---------|
| ENSG00000196208 | GGAAGCC |
| ENSG00000196208 | UAAUAGU |
| ENSG00000196208 | UAUUGCU |
| ENSG00000196208 | UUGGUUC |
| ENSG00000196220 | AAAGUGC |
| ENSG00000196220 | AAGGCAC |
| ENSG00000196220 | AAGGCGC |
| ENSG00000196220 | AAGUGCA |
| ENSG00000196220 | AAUGCCC |
| ENSG00000196220 | AGCAGCU |
| ENSG00000196220 | AGCCUGC |
| ENSG00000196220 | AGGCAGG |
| ENSG00000196220 | CACACCU |
| ENSG00000196220 | CACAGGG |
| ENSG00000196220 | CAGACAG |
| ENSG00000196220 | CAGCAGA |
| ENSG00000196220 | CCAGUGC |
| ENSG00000196220 | CCAGUGU |
| ENSG00000196220 | CCCCCAG |
| ENSG00000196220 | CCCUGG  |
| ENSG00000196220 | CUCCAA  |
| ENSG00000196220 | CUCCAC  |
| ENSG00000196220 | CUCUGGG |
| ENSG00000196220 | CUCUUC  |
| ENSG00000196220 | CUGCAGC |
| ENSG00000196220 | CUUUGGU |
| ENSG00000196220 | GAGAAU  |
| ENSG00000196220 | GAGCUGC |
| ENSG00000196220 | GAGGUAG |
| ENSG00000196220 | GAGGUAU |
| ENSG00000196220 | GCACCAU |
| ENSG00000196220 | GCUGGUG |
| ENSG00000196220 | GGCAAGA |
| ENSG00000196220 | GGCAGGG |
| ENSG00000196220 | GGCAUUG |
| ENSG00000196220 | GGGCAG  |
| ENSG00000196220 | GUCAGUU |
| ENSG00000196220 | GUCUCUG |
| ENSG00000196220 | GUGCAA  |
| ENSG00000196220 | UAUUGCU |
| ENSG00000196220 | UCACAGU |
| ENSG00000196220 | UCACAUU |
| ENSG00000196220 | UCAUAGA |
| ENSG00000196220 | UCCAGUU |
| ENSG00000196220 | UCCACA  |
| ENSG00000196220 | UCCCACC |
| ENSG00000196220 | UCCCUGU |
| ENSG00000196220 | UCCCUUG |
| ENSG00000196220 | UCCUUGC |
| ENSG00000196220 | UCUGGAA |
| ENSG00000196220 | UGACCUA |
| ENSG00000196220 | UGCAAAG |
| ENSG00000196220 | UGUCUUU |
| ENSG00000196220 | UUCUGCA |
| ENSG00000196220 | UUGGUCC |
| ENSG00000196226 | AAAGAGC |
| ENSG00000196230 | AAUACUG |
| ENSG00000196230 | AUAAUAC |
| ENSG00000196230 | GAGGCAG |
| ENSG00000196230 | UUUCAAC |
| ENSG00000196233 | ACAGUAU |
| ENSG00000196233 | CUACAGU |
| ENSG00000196233 | CUGCAGC |
| ENSG00000196233 | GAGGUAG |

|                 |         |
|-----------------|---------|
| ENSG00000196233 | GAGGUAU |
| ENSG00000196233 | GAUUGUC |
| ENSG00000196233 | GCAACUU |
| ENSG00000196233 | UGAAAUG |
| ENSG00000196233 | UGCUCAC |
| ENSG00000196233 | UUGGCAC |
| ENSG00000196235 | UGAAAGG |
| ENSG00000196236 | AGCAAAA |
| ENSG00000196262 | AACUCUA |
| ENSG00000196262 | GAGCUAA |
| ENSG00000196268 | UAAUAUC |
| ENSG00000196277 | AAACUGU |
| ENSG00000196277 | ACAAUUA |
| ENSG00000196277 | ACAUUCA |
| ENSG00000196277 | AGCAGCA |
| ENSG00000196277 | AGCAGCU |
| ENSG00000196277 | AUGCAUU |
| ENSG00000196277 | GGCAGUG |
| ENSG00000196277 | UACAAAG |
| ENSG00000196277 | UUGGUCC |
| ENSG00000196284 | AUAUAAC |
| ENSG00000196284 | CUGGAAA |
| ENSG00000196284 | GUAAACA |
| ENSG00000196284 | UAAUAUC |
| ENSG00000196284 | UUCUUGU |
| ENSG00000196296 | AGCAGCU |
| ENSG00000196296 | GGAGGAG |
| ENSG00000196296 | GUGACAG |
| ENSG00000196305 | ACUGCAU |
| ENSG00000196305 | UGCAUAG |
| ENSG00000196313 | AAAUUUC |
| ENSG00000196313 | AACAGUC |
| ENSG00000196313 | AGCUUAU |
| ENSG00000196313 | CACAGUG |
| ENSG00000196313 | CUCCAGC |
| ENSG00000196313 | CUCCAA  |
| ENSG00000196313 | CUCCAC  |
| ENSG00000196313 | UCAAGUA |
| ENSG00000196313 | UCACAGU |
| ENSG00000196323 | AAAGAGG |
| ENSG00000196323 | AAAGUGC |
| ENSG00000196323 | AAGGUGC |
| ENSG00000196323 | AAGUAGC |
| ENSG00000196323 | AAGUGCU |
| ENSG00000196323 | ACUCAGG |
| ENSG00000196323 | ACUGGAU |
| ENSG00000196323 | ACUGGCU |
| ENSG00000196323 | AGCCAGU |
| ENSG00000196323 | AGGCAGG |
| ENSG00000196323 | AGGGUCU |
| ENSG00000196323 | AGUGCAA |
| ENSG00000196323 | AGUGCUU |
| ENSG00000196323 | AUGGCUU |
| ENSG00000196323 | CAAAGCA |
| ENSG00000196323 | CAGUGCA |
| ENSG00000196323 | CUAUACA |
| ENSG00000196323 | CUCUGGG |
| ENSG00000196323 | CUCUUCC |
| ENSG00000196323 | CUUUGGU |
| ENSG00000196323 | GAGACCU |
| ENSG00000196323 | GAGGCAG |
| ENSG00000196323 | GAUUGUC |
| ENSG00000196323 | GCUAGCA |
| ENSG00000196323 | GCUGGUG |



|                 |         |
|-----------------|---------|
| ENSG00000196323 | GGAAGAC |
| ENSG00000196323 | GGCUGCG |
| ENSG00000196323 | GGUUUAC |
| ENSG00000196323 | GUGCCAC |
| ENSG00000196323 | UAUGGUU |
| ENSG00000196323 | UCCCUGU |
| ENSG00000196323 | UGUAUAA |
| ENSG00000196331 | AAAGAGC |
| ENSG00000196338 | AAGAACC |
| ENSG00000196338 | ACUGUGU |
| ENSG00000196338 | AGCACCA |
| ENSG00000196338 | AGGGAGG |
| ENSG00000196338 | GAGAAAU |
| ENSG00000196338 | UCCAGAG |
| ENSG00000196338 | UGAAAGG |
| ENSG00000196353 | AAAUUUC |
| ENSG00000196353 | AACAAAC |
| ENSG00000196353 | GGCGACA |
| ENSG00000196353 | UCAACAG |
| ENSG00000196353 | UUCAAAU |
| ENSG00000196358 | CCCCAG  |
| ENSG00000196361 | AAAAAUC |
| ENSG00000196361 | AAAACUG |
| ENSG00000196361 | AACCUGU |
| ENSG00000196361 | AACUGGU |
| ENSG00000196361 | CAGCAGA |
| ENSG00000196361 | CUCCAC  |
| ENSG00000196361 | GAGCCCU |
| ENSG00000196361 | GAGGUAU |
| ENSG00000196361 | GCAGAAG |
| ENSG00000196361 | GCCCUUA |
| ENSG00000196361 | GGAGAGA |
| ENSG00000196361 | GGAUUUU |
| ENSG00000196361 | GUAAACA |
| ENSG00000196361 | UACAAAG |
| ENSG00000196361 | UAUUACC |
| ENSG00000196361 | UAUUGCU |
| ENSG00000196361 | UCACCAC |
| ENSG00000196361 | UCCCACC |
| ENSG00000196361 | UCCCUUG |
| ENSG00000196361 | UCCUUGC |
| ENSG00000196361 | UCUCCAA |
| ENSG00000196361 | UGCUCAC |
| ENSG00000196363 | AAGACAU |
| ENSG00000196363 | CAAUUGC |
| ENSG00000196363 | CCCACCU |
| ENSG00000196363 | CCUUCUG |
| ENSG00000196363 | CUACAAA |
| ENSG00000196363 | UAUUACC |
| ENSG00000196363 | UUGGCAA |
| ENSG00000196367 | ACAUUCA |
| ENSG00000196367 | UAUAAAG |
| ENSG00000196367 | UCACAUU |
| ENSG00000196367 | UGUGCUU |
| ENSG00000196368 | AAAGUAU |
| ENSG00000196368 | AGCACCA |
| ENSG00000196368 | GGCUCUG |
| ENSG00000196368 | GUAGUGU |
| ENSG00000196368 | UACAAAG |
| ENSG00000196368 | UAUAAAG |
| ENSG00000196368 | UUCAAGC |
| ENSG00000196368 | UUCUUGU |
| ENSG00000196371 | GUAAACA |
| ENSG00000196371 | UUCUAAU |

|                 |         |
|-----------------|---------|
| ENSG00000196374 | AAAGAGC |
| ENSG00000196374 | GGCUCUG |
| ENSG00000196376 | AAAAAUC |
| ENSG00000196376 | ACAAUAU |
| ENSG00000196376 | ACAUUCA |
| ENSG00000196376 | ACCCAUU |
| ENSG00000196376 | AGCCAGU |
| ENSG00000196376 | CACAGUG |
| ENSG00000196376 | GCCUGGA |
| ENSG00000196376 | GGAAUGU |
| ENSG00000196376 | GGAGUCC |
| ENSG00000196376 | GUCAGUU |
| ENSG00000196376 | GUGCUUG |
| ENSG00000196376 | UAAUAGU |
| ENSG00000196376 | UGUGCUU |
| ENSG00000196396 | AACUACU |
| ENSG00000196396 | AAGGCAC |
| ENSG00000196396 | ACACACU |
| ENSG00000196396 | ACCACAG |
| ENSG00000196396 | AGCACCA |
| ENSG00000196396 | AGCAGCU |
| ENSG00000196396 | AGCCCUU |
| ENSG00000196396 | AUGCAUU |
| ENSG00000196396 | AUGUCUG |
| ENSG00000196396 | CACACCU |
| ENSG00000196396 | GGAAUGU |
| ENSG00000196405 | UAUUACC |
| ENSG00000196407 | UGCUGAC |
| ENSG00000196411 | AAAGUGC |
| ENSG00000196411 | AAGUGCA |
| ENSG00000196411 | AGUGCAA |
| ENSG00000196411 | AUACAAG |
| ENSG00000196411 | CAAAGUG |
| ENSG00000196411 | CUGCCCC |
| ENSG00000196411 | CUUUGGU |
| ENSG00000196411 | UUGGUCC |
| ENSG00000196422 | AGGACAC |
| ENSG00000196422 | GUGCUUG |
| ENSG00000196422 | UACAAAG |
| ENSG00000196422 | UGUGCUU |
| ENSG00000196428 | AAAGUGC |
| ENSG00000196428 | ACAAUAU |
| ENSG00000196428 | AGUGCUG |
| ENSG00000196428 | AGUGGUU |
| ENSG00000196428 | GAGGUAG |
| ENSG00000196428 | GAGGUAU |
| ENSG00000196428 | GAUUGUA |
| ENSG00000196428 | GCCUCUG |
| ENSG00000196428 | UGGAUAA |
| ENSG00000196428 | UUCAAGC |
| ENSG00000196449 | CCAGCAU |
| ENSG00000196449 | UUCAAAU |
| ENSG00000196453 | AAAAAUC |
| ENSG00000196453 | ACAGUAU |
| ENSG00000196458 | CCUGCUG |
| ENSG00000196458 | CUUCACC |
| ENSG00000196458 | GUGCUUG |
| ENSG00000196459 | UUCUGCA |
| ENSG00000196470 | AACACUG |
| ENSG00000196470 | AAUUAUU |
| ENSG00000196470 | ACUGGCC |
| ENSG00000196470 | AGCAGCA |
| ENSG00000196470 | AGUGGUU |
| ENSG00000196470 | AUGGCUU |

|                 |          |
|-----------------|----------|
| ENSG00000196470 | CCUGUAC  |
| ENSG00000196470 | CUGUUGA  |
| ENSG00000196470 | GCAACUU  |
| ENSG00000196476 | AGGGUCU  |
| ENSG00000196482 | AACACUG  |
| ENSG00000196482 | AACAGUC  |
| ENSG00000196482 | AAUUGCU  |
| ENSG00000196482 | AAUUUUA  |
| ENSG00000196482 | ACAGUAU  |
| ENSG00000196482 | ACCCAUU  |
| ENSG00000196482 | ACCCUGU  |
| ENSG00000196482 | ACUGUUU  |
| ENSG00000196482 | AGAUGUG  |
| ENSG00000196482 | AGCAGCA  |
| ENSG00000196482 | AGCAGCU  |
| ENSG00000196482 | AUAUUAU  |
| ENSG00000196482 | AUGAUGA  |
| ENSG00000196482 | AUGCACC  |
| ENSG00000196482 | CAGCAGG  |
| ENSG00000196482 | CCAGGAG  |
| ENSG00000196482 | CCUGAG   |
| ENSG00000196482 | CUACAGU  |
| ENSG00000196482 | CUAUACA  |
| ENSG00000196482 | CUUCUCU  |
| ENSG00000196482 | GAGAUGA  |
| ENSG00000196482 | GCAUCCC  |
| ENSG00000196482 | GGAAGCC  |
| ENSG00000196482 | GGCAGGG  |
| ENSG00000196482 | GUAAACA  |
| ENSG00000196482 | GUUAGGA  |
| ENSG00000196482 | UAAUAUC  |
| ENSG00000196482 | UAUAAUA  |
| ENSG00000196482 | UCACACA  |
| ENSG00000196482 | UCAUUUG  |
| ENSG00000196482 | UCCCUGU  |
| ENSG00000196482 | UCCCUUG  |
| ENSG00000196482 | UCCUGAG  |
| ENSG00000196482 | UGAAAGG  |
| ENSG00000196482 | UGCAUUG  |
| ENSG00000196482 | UUAGGAU  |
| ENSG00000196482 | UUGGCAA  |
| ENSG00000196482 | UUGGCAC  |
| ENSG00000196498 | AAUACUG  |
| ENSG00000196498 | AGCACCA  |
| ENSG00000196498 | AGCAGCA  |
| ENSG00000196498 | CAA AUGC |
| ENSG00000196498 | CCCACCG  |
| ENSG00000196498 | CCCCUGG  |
| ENSG00000196498 | CCUGAG   |
| ENSG00000196498 | CUUUGGU  |
| ENSG00000196498 | GAAGGUC  |
| ENSG00000196498 | GGACGGA  |
| ENSG00000196498 | GUCCAGA  |
| ENSG00000196498 | UCCCACC  |
| ENSG00000196498 | UUGGUUC  |
| ENSG00000196504 | AAAUUUC  |
| ENSG00000196504 | AAGGCAC  |
| ENSG00000196504 | AAUCUCA  |
| ENSG00000196504 | ACUGUAG  |
| ENSG00000196504 | AGGGUCU  |
| ENSG00000196504 | AUUGCAC  |
| ENSG00000196504 | CAUGGAU  |
| ENSG00000196504 | CCAGUGU  |
| ENSG00000196504 | GAAACAU  |

|                 |         |
|-----------------|---------|
| ENSG00000196504 | GACAACU |
| ENSG00000196504 | GCAACUU |
| ENSG00000196504 | UCCCUUG |
| ENSG00000196504 | UCCCUUU |
| ENSG00000196504 | UCUUGAG |
| ENSG00000196504 | UGAAAGG |
| ENSG00000196504 | UGAGGAC |
| ENSG00000196504 | UUCAAAU |
| ENSG00000196504 | UUUUUGC |
| ENSG00000196505 | AUACAAG |
| ENSG00000196505 | UCCAUA  |
| ENSG00000196507 | GCUGGUG |
| ENSG00000196507 | UGGGUGA |
| ENSG00000196517 | AAAGUGC |
| ENSG00000196517 | AACACUG |
| ENSG00000196517 | CAAAGUG |
| ENSG00000196517 | GUAAACA |
| ENSG00000196517 | GUCUCUG |
| ENSG00000196517 | UAUUGCU |
| ENSG00000196517 | UUGGCAA |
| ENSG00000196526 | AAUUUUA |
| ENSG00000196526 | ACAAUUA |
| ENSG00000196526 | ACAGUAC |
| ENSG00000196526 | ACAGUAU |
| ENSG00000196526 | ACAUUCA |
| ENSG00000196526 | CACAGUG |
| ENSG00000196526 | CUUUGGU |
| ENSG00000196526 | GAGAAAU |
| ENSG00000196526 | GGCAGCG |
| ENSG00000196526 | UCACAGG |
| ENSG00000196526 | UCUGGAA |
| ENSG00000196526 | UGAGAAG |
| ENSG00000196526 | UGAGAAU |
| ENSG00000196532 | AAAGAGC |
| ENSG00000196533 | GGGUCUU |
| ENSG00000196535 | CAGCAGG |
| ENSG00000196535 | CCUGAG  |
| ENSG00000196542 | UGCAUAG |
| ENSG00000196542 | UUGGCAA |
| ENSG00000196544 | AGCAGCA |
| ENSG00000196544 | CCCUGAG |
| ENSG00000196547 | ACUCAGC |
| ENSG00000196547 | CACAGUG |
| ENSG00000196547 | CUGCCC  |
| ENSG00000196547 | UCACAGU |
| ENSG00000196547 | UGAAGCU |
| ENSG00000196547 | UGAAGUG |
| ENSG00000196549 | AAUCUCU |
| ENSG00000196549 | CUCAAAC |
| ENSG00000196549 | UCAUUUG |
| ENSG00000196549 | UGCAAAG |
| ENSG00000196549 | UGUAUAA |
| ENSG00000196549 | UUCAAGC |
| ENSG00000196549 | UUUCAAC |
| ENSG00000196557 | AACCUGU |
| ENSG00000196557 | AUUGCAC |
| ENSG00000196557 | UAUUGCU |
| ENSG00000196562 | CAAAGCA |
| ENSG00000196562 | GUGAGGU |
| ENSG00000196576 | CGUACCG |
| ENSG00000196576 | GCUGGUG |
| ENSG00000196576 | GUGAGGU |
| ENSG00000196576 | UACAAAG |
| ENSG00000196581 | AACGGAA |

|                 |          |
|-----------------|----------|
| ENSG00000196581 | AAUUGCU  |
| ENSG00000196581 | ACAGUAU  |
| ENSG00000196581 | AUGGCAC  |
| ENSG00000196581 | CCCCAG   |
| ENSG00000196581 | CUACAGU  |
| ENSG00000196581 | CUGCCCC  |
| ENSG00000196581 | GAAAACA  |
| ENSG00000196581 | GCCCUGU  |
| ENSG00000196581 | GCUACAU  |
| ENSG00000196581 | GUCUGCC  |
| ENSG00000196581 | UCACCAC  |
| ENSG00000196581 | UGCCUG   |
| ENSG00000196581 | UUGGCAC  |
| ENSG00000196586 | ACUCAGG  |
| ENSG00000196586 | ACUUGGA  |
| ENSG00000196586 | AGGUUAU  |
| ENSG00000196586 | CAGCUGG  |
| ENSG00000196586 | GAGAACC  |
| ENSG00000196586 | GAGAACU  |
| ENSG00000196586 | GUGAAUG  |
| ENSG00000196586 | UCACAUU  |
| ENSG00000196586 | UCAUUUG  |
| ENSG00000196586 | UCUAGAG  |
| ENSG00000196588 | AUAAUAC  |
| ENSG00000196588 | AUAU AAC |
| ENSG00000196588 | CCUGUAC  |
| ENSG00000196588 | CUGCCCC  |
| ENSG00000196588 | GAGGUAU  |
| ENSG00000196588 | GAUUGUA  |
| ENSG00000196588 | GGAAUGU  |
| ENSG00000196588 | UAUAAUA  |
| ENSG00000196591 | AAAACUG  |
| ENSG00000196591 | CAGUCCA  |
| ENSG00000196591 | GCUUCCU  |
| ENSG00000196591 | UAAUAGU  |
| ENSG00000196591 | UUGACAC  |
| ENSG00000196591 | UUGCAA   |
| ENSG00000196591 | UUUUUGC  |
| ENSG00000196628 | AAAGUAA  |
| ENSG00000196628 | AACCUGU  |
| ENSG00000196628 | AAGGCAC  |
| ENSG00000196628 | AAGUGCA  |
| ENSG00000196628 | AAUACUG  |
| ENSG00000196628 | AAUCUCU  |
| ENSG00000196628 | ACAAGGU  |
| ENSG00000196628 | ACUCAGC  |
| ENSG00000196628 | ACUGGCC  |
| ENSG00000196628 | ACUGUUU  |
| ENSG00000196628 | ACUUGGA  |
| ENSG00000196628 | AGCAUUC  |
| ENSG00000196628 | AGUGCUG  |
| ENSG00000196628 | AUGCAUU  |
| ENSG00000196628 | AUUGCAC  |
| ENSG00000196628 | CACAGUG  |
| ENSG00000196628 | CCAUUAC  |
| ENSG00000196628 | CUCUCC   |
| ENSG00000196628 | CUUCACC  |
| ENSG00000196628 | GAAAACA  |
| ENSG00000196628 | GAAGGAA  |
| ENSG00000196628 | GAGGCAG  |
| ENSG00000196628 | GAGUUGG  |
| ENSG00000196628 | GCAACUU  |
| ENSG00000196628 | GCUACAU  |
| ENSG00000196628 | GCUUCCU  |

|                 |          |
|-----------------|----------|
| ENSG00000196628 | GGAAGAC  |
| ENSG00000196628 | GGAGGAG  |
| ENSG00000196628 | GGAGGCA  |
| ENSG00000196628 | GUGUGGC  |
| ENSG00000196628 | UAUAAUA  |
| ENSG00000196628 | UCACAAG  |
| ENSG00000196628 | UCACCAC  |
| ENSG00000196628 | UCCAGUU  |
| ENSG00000196628 | UCCUAUA  |
| ENSG00000196628 | UCCUUGC  |
| ENSG00000196628 | UGCUGAC  |
| ENSG00000196628 | UGUAUAA  |
| ENSG00000196628 | UGUGUGG  |
| ENSG00000196628 | UUUCAAC  |
| ENSG00000196632 | AAAACUG  |
| ENSG00000196632 | AAAAGUA  |
| ENSG00000196632 | AAAGAAU  |
| ENSG00000196632 | AAGUGCA  |
| ENSG00000196632 | ACUGCAG  |
| ENSG00000196632 | ACUGGAU  |
| ENSG00000196632 | ACUGUGU  |
| ENSG00000196632 | AGCAUUC  |
| ENSG00000196632 | AGCCAGU  |
| ENSG00000196632 | AGCUUUA  |
| ENSG00000196632 | AGUGCAA  |
| ENSG00000196632 | CCAGUGU  |
| ENSG00000196632 | CUGCAGG  |
| ENSG00000196632 | GCAACUU  |
| ENSG00000196632 | UCACAUU  |
| ENSG00000196632 | UGGAUAA  |
| ENSG00000196632 | UGUGUCA  |
| ENSG00000196639 | AAAAAUC  |
| ENSG00000196639 | CUGCAGC  |
| ENSG00000196639 | GGCUCAG  |
| ENSG00000196639 | UGAGAAG  |
| ENSG00000196639 | UGCAGCU  |
| ENSG00000196642 | GUAAACA  |
| ENSG00000196644 | CAGUCUG  |
| ENSG00000196652 | CCCUGAG  |
| ENSG00000196652 | CUACAAA  |
| ENSG00000196652 | CUUCUCU  |
| ENSG00000196652 | UCCCUGU  |
| ENSG00000196652 | UGCUGAC  |
| ENSG00000196652 | UUCAAAU  |
| ENSG00000196664 | AGAUAAA  |
| ENSG00000196664 | UGCAAAG  |
| ENSG00000196664 | UUUGCAA  |
| ENSG00000196700 | AAAAACC  |
| ENSG00000196700 | AAAAAUC  |
| ENSG00000196700 | AAGUGCA  |
| ENSG00000196700 | AAGUGCU  |
| ENSG00000196700 | AGCACCA  |
| ENSG00000196700 | AUAAAAGU |
| ENSG00000196700 | AUUGCAC  |
| ENSG00000196700 | CCAGUGC  |
| ENSG00000196700 | CCAGUGU  |
| ENSG00000196700 | CCCUGAG  |
| ENSG00000196700 | CUGGAAA  |
| ENSG00000196700 | GGUUACC  |
| ENSG00000196700 | UAUGGUU  |
| ENSG00000196700 | UCACAAG  |
| ENSG00000196700 | UCCAGUU  |
| ENSG00000196700 | UGUAUAA  |
| ENSG00000196704 | GAAGGUC  |

|                 |         |
|-----------------|---------|
| ENSG00000196711 | AGAUAAA |
| ENSG00000196712 | AACAUUC |
| ENSG00000196712 | AAGUGCA |
| ENSG00000196712 | ACAUUAC |
| ENSG00000196712 | ACUGUGU |
| ENSG00000196712 | AGCAGCA |
| ENSG00000196712 | AUAUUAU |
| ENSG00000196712 | AUCAUAC |
| ENSG00000196712 | AUGGCUU |
| ENSG00000196712 | AUUGCAC |
| ENSG00000196712 | GAGUUGA |
| ENSG00000196712 | UCACAGG |
| ENSG00000196712 | UCACAGU |
| ENSG00000196712 | UGCAUAG |
| ENSG00000196712 | UGCAUUA |
| ENSG00000196712 | UUGAUCU |
| ENSG00000196712 | UUGGCAA |
| ENSG00000196712 | UUGGCAC |
| ENSG00000196715 | AAAGCUG |
| ENSG00000196715 | UCAUGAU |
| ENSG00000196724 | ACAUUCA |
| ENSG00000196730 | AAGGCAC |
| ENSG00000196730 | AGGGAGG |
| ENSG00000196730 | GAGAUGA |
| ENSG00000196730 | GAGGUAG |
| ENSG00000196730 | UAAUAUC |
| ENSG00000196743 | AAGUUGU |
| ENSG00000196743 | UAAUACA |
| ENSG00000196747 | AAAGAGC |
| ENSG00000196747 | CUUUGGU |
| ENSG00000196767 | CCAGUGC |
| ENSG00000196776 | AAAGAGG |
| ENSG00000196776 | AAUCACU |
| ENSG00000196776 | ACUCCAG |
| ENSG00000196776 | ACUGUAG |
| ENSG00000196776 | AGGCAGG |
| ENSG00000196776 | AUAAUAC |
| ENSG00000196776 | AUAUAAC |
| ENSG00000196776 | AUGGCUU |
| ENSG00000196776 | AUGUGCC |
| ENSG00000196776 | CAAAACU |
| ENSG00000196776 | CACACCU |
| ENSG00000196776 | CAGCAGG |
| ENSG00000196776 | CUGGCUC |
| ENSG00000196776 | CUUUGGU |
| ENSG00000196776 | GACAACU |
| ENSG00000196776 | GAGGCAG |
| ENSG00000196776 | GCUACAU |
| ENSG00000196776 | UUGGUCC |
| ENSG00000196781 | ACUGUAG |
| ENSG00000196781 | AUACAAG |
| ENSG00000196782 | AAAAGUA |
| ENSG00000196782 | AAAGUAA |
| ENSG00000196782 | AACAAAC |
| ENSG00000196782 | AAGUGCA |
| ENSG00000196782 | ACAUUAC |
| ENSG00000196782 | AGUAGAC |
| ENSG00000196782 | AGUGCAA |
| ENSG00000196782 | AUGAUGA |
| ENSG00000196782 | CCAGUAC |
| ENSG00000196782 | CCCACCU |
| ENSG00000196782 | CUGCAGC |
| ENSG00000196782 | CUGCAGG |
| ENSG00000196782 | GGAGGAG |

|                 |          |
|-----------------|----------|
| ENSG00000196782 | UACAAAG  |
| ENSG00000196782 | UAUAUGA  |
| ENSG00000196782 | UCCCACC  |
| ENSG00000196782 | UGAAGUG  |
| ENSG00000196782 | UUGGUCC  |
| ENSG00000196782 | UUGGUUC  |
| ENSG00000196782 | UUUUUGC  |
| ENSG00000196787 | AAAAAUC  |
| ENSG00000196787 | AAGUCAC  |
| ENSG00000196787 | CUAGUAA  |
| ENSG00000196787 | CUAGUAG  |
| ENSG00000196787 | GAGACCU  |
| ENSG00000196787 | GCAGAAG  |
| ENSG00000196787 | GUGCUUG  |
| ENSG00000196787 | UACAAAG  |
| ENSG00000196787 | UCACAGG  |
| ENSG00000196787 | UCACAGU  |
| ENSG00000196787 | UGGGACA  |
| ENSG00000196787 | UGUGCUU  |
| ENSG00000196787 | UCCUCG   |
| ENSG00000196787 | UUUGCAA  |
| ENSG00000196787 | UUUGCAC  |
| ENSG00000196792 | AAAAAUC  |
| ENSG00000196792 | AAAGUUU  |
| ENSG00000196792 | AAUUUUA  |
| ENSG00000196792 | AGCACCA  |
| ENSG00000196792 | AUAU AAC |
| ENSG00000196792 | AUCCUUG  |
| ENSG00000196792 | CUUGGAG  |
| ENSG00000196792 | GAGAUGA  |
| ENSG00000196792 | GGAAGAC  |
| ENSG00000196792 | UAAUGCU  |
| ENSG00000196792 | UACAAAG  |
| ENSG00000196792 | UCUUGAG  |
| ENSG00000196792 | UGUCUUU  |
| ENSG00000196814 | AACACUG  |
| ENSG00000196814 | ACCACAG  |
| ENSG00000196814 | AGCCCUU  |
| ENSG00000196814 | AGGGAGG  |
| ENSG00000196814 | AUAUU AU |
| ENSG00000196814 | CAGUAGA  |
| ENSG00000196814 | CAGUAGU  |
| ENSG00000196814 | GAGCCCU  |
| ENSG00000196814 | GAGGUAG  |
| ENSG00000196814 | GAGGU AU |
| ENSG00000196814 | GUGCUUG  |
| ENSG00000196814 | UCACAGU  |
| ENSG00000196814 | UCACAUU  |
| ENSG00000196814 | UCCCUUU  |
| ENSG00000196814 | UGUGCUU  |
| ENSG00000196821 | AGCAUUC  |
| ENSG00000196821 | CAGACAG  |
| ENSG00000196821 | CCUGCUG  |
| ENSG00000196821 | CCUUCUG  |
| ENSG00000196821 | CUUGU AU |
| ENSG00000196821 | CUUUGGU  |
| ENSG00000196821 | GCUGGUG  |
| ENSG00000196821 | GCUUCCU  |
| ENSG00000196821 | GUUAAUG  |
| ENSG00000196821 | UCAUUUG  |
| ENSG00000196821 | UGCAUAG  |
| ENSG00000196821 | UGCAU AU |
| ENSG00000196821 | UGCUGAC  |
| ENSG00000196821 | UGUCUUU  |



|                 |         |
|-----------------|---------|
| ENSG00000196821 | UUCUUGU |
| ENSG00000196821 | UUGGCAA |
| ENSG00000196821 | UUGGCAC |
| ENSG00000196850 | AUGGCUU |
| ENSG00000196850 | CAGCAGG |
| ENSG00000196850 | GAGGUAG |
| ENSG00000196850 | GAGGUAU |
| ENSG00000196850 | GUAAACA |
| ENSG00000196850 | UGAAAUG |
| ENSG00000196850 | UGCCAGC |
| ENSG00000196866 | AAAGAGC |
| ENSG00000196866 | GGGUGGU |
| ENSG00000196872 | AAAAAUC |
| ENSG00000196872 | AAUUAUU |
| ENSG00000196872 | AGCUGCC |
| ENSG00000196872 | AUGCAUU |
| ENSG00000196872 | GUAAACA |
| ENSG00000196872 | UGCAUUG |
| ENSG00000196876 | AACAAAC |
| ENSG00000196876 | AAGUUGU |
| ENSG00000196878 | UUGGUCC |
| ENSG00000196890 | AAAGAGC |
| ENSG00000196914 | AAAACUG |
| ENSG00000196914 | AAAGAGG |
| ENSG00000196914 | AAAGGUA |
| ENSG00000196914 | AAGUCUU |
| ENSG00000196914 | ACCUGGA |
| ENSG00000196914 | ACUGGCU |
| ENSG00000196914 | AGCUUAU |
| ENSG00000196914 | AGUGAUC |
| ENSG00000196914 | AGUGCAA |
| ENSG00000196914 | AGUGCCU |
| ENSG00000196914 | AGUGUGC |
| ENSG00000196914 | AUCCUUG |
| ENSG00000196914 | AUGUGCC |
| ENSG00000196914 | CAGCAGA |
| ENSG00000196914 | CAGCAGG |
| ENSG00000196914 | CAGUAGA |
| ENSG00000196914 | CAGUAGU |
| ENSG00000196914 | CAGUGCA |
| ENSG00000196914 | CCAGUGC |
| ENSG00000196914 | CCAGUGU |
| ENSG00000196914 | CCCACCG |
| ENSG00000196914 | CCCACCU |
| ENSG00000196914 | CCUUCUG |
| ENSG00000196914 | CCUUCUU |
| ENSG00000196914 | CUAGUAG |
| ENSG00000196914 | CUGCUCA |
| ENSG00000196914 | CUGGAAA |
| ENSG00000196914 | GAAACAU |
| ENSG00000196914 | GAUCAGA |
| ENSG00000196914 | GAUUGUC |
| ENSG00000196914 | GCACCAU |
| ENSG00000196914 | GCUUCCU |
| ENSG00000196914 | GUAGUGU |
| ENSG00000196914 | GUGCAAA |
| ENSG00000196914 | GUGCCUG |
| ENSG00000196914 | GUGCUUG |
| ENSG00000196914 | UAAUAUC |
| ENSG00000196914 | UACAAAG |
| ENSG00000196914 | UAGUGAG |
| ENSG00000196914 | UAUCAGA |
| ENSG00000196914 | UCAAGUA |
| ENSG00000196914 | UCCAGAG |

|                 |         |
|-----------------|---------|
| ENSG00000196914 | UCCAGUU |
| ENSG00000196914 | UCCCACC |
| ENSG00000196914 | UGCAGCU |
| ENSG00000196914 | UGGAUAA |
| ENSG00000196914 | UGGGUGA |
| ENSG00000196914 | UGUAUGU |
| ENSG00000196914 | UUCAAGC |
| ENSG00000196914 | UUGGCAA |
| ENSG00000196914 | UUGGCAC |
| ENSG00000196914 | UUGUUCG |
| ENSG00000196914 | UUUCAAC |
| ENSG00000196917 | AAAGAGC |
| ENSG00000196917 | CCUUCUU |
| ENSG00000196917 | UGAAAUG |
| ENSG00000196917 | UUUCAAC |
| ENSG00000196924 | AGGCAGG |
| ENSG00000196924 | CAGGUGA |
| ENSG00000196932 | AAGGCAC |
| ENSG00000196932 | AUCCUUG |
| ENSG00000196932 | CCCUGAG |
| ENSG00000196932 | CCUUCAU |
| ENSG00000196932 | CUGGAAA |
| ENSG00000196932 | GACUUCC |
| ENSG00000196932 | GAGGUAG |
| ENSG00000196932 | GAGGUAU |
| ENSG00000196932 | GAUCAGA |
| ENSG00000196932 | GCCCUUA |
| ENSG00000196932 | GUGAGGU |
| ENSG00000196932 | UCCCUUG |
| ENSG00000196932 | UCCCUUU |
| ENSG00000196932 | UUCUGCA |
| ENSG00000196935 | AAGUGUG |
| ENSG00000196935 | AAUGCCC |
| ENSG00000196935 | ACAUAGA |
| ENSG00000196935 | ACAUUCA |
| ENSG00000196935 | CAAUUGC |
| ENSG00000196935 | CAGACAG |
| ENSG00000196935 | CUCCAGC |
| ENSG00000196935 | GUCCAGA |
| ENSG00000196935 | GUUAAUG |
| ENSG00000196935 | UACAAAG |
| ENSG00000196935 | UUUCAAC |
| ENSG00000196937 | AAAGUGC |
| ENSG00000196937 | AAUCCUU |
| ENSG00000196937 | GGCUGCG |
| ENSG00000196937 | GUGCUUG |
| ENSG00000196937 | UGGCUGC |
| ENSG00000196950 | AAGAACC |
| ENSG00000196950 | AAUGUUG |
| ENSG00000196950 | ACACACC |
| ENSG00000196950 | ACAGUAU |
| ENSG00000196950 | ACAUUAC |
| ENSG00000196950 | ACUGCAU |
| ENSG00000196950 | AGCAGCU |
| ENSG00000196950 | AGUAGUU |
| ENSG00000196950 | CACAGUG |
| ENSG00000196950 | CACUGUU |
| ENSG00000196950 | CAGUAGA |
| ENSG00000196950 | CUGUUGA |
| ENSG00000196950 | GAGAUGA |
| ENSG00000196950 | GAUUGUC |
| ENSG00000196950 | GUAGUGU |
| ENSG00000196950 | GUGACAG |
| ENSG00000196950 | UAAUGCU |

|                 |         |
|-----------------|---------|
| ENSG00000196950 | UCACAUU |
| ENSG00000196950 | UUCUAAU |
| ENSG00000196950 | UUGGCAC |
| ENSG00000196961 | AGCAGCA |
| ENSG00000196961 | AGGGAGG |
| ENSG00000196961 | AUAAUAC |
| ENSG00000196961 | CAGCAGA |
| ENSG00000196961 | GGGGCAG |
| ENSG00000196961 | GUAAACA |
| ENSG00000196961 | UAAUACA |
| ENSG00000196981 | AGGCAGG |
| ENSG00000196998 | AAGUGCU |
| ENSG00000196998 | UAAUGCU |
| ENSG00000197006 | ACCUGGA |
| ENSG00000197006 | CUACAAA |
| ENSG00000197006 | GGAGGCA |
| ENSG00000197006 | UACAAAG |
| ENSG00000197006 | UGCCAGC |
| ENSG00000197019 | GGCUCAG |
| ENSG00000197019 | UCUCCAA |
| ENSG00000197024 | CUGCAGC |
| ENSG00000197024 | GAUUGUC |
| ENSG00000197024 | UUGGCAC |
| ENSG00000197037 | AAGGCAC |
| ENSG00000197037 | CAAAGUG |
| ENSG00000197037 | GGCAAGA |
| ENSG00000197037 | UAAUACA |
| ENSG00000197037 | UUCAAAU |
| ENSG00000197045 | AAAGCUG |
| ENSG00000197045 | AAAGUAU |
| ENSG00000197045 | AACAUUC |
| ENSG00000197045 | AAGGCAC |
| ENSG00000197045 | ACAGUAU |
| ENSG00000197045 | ACAUUCA |
| ENSG00000197045 | ACUGCAU |
| ENSG00000197045 | AGCACCA |
| ENSG00000197045 | AGCCCUU |
| ENSG00000197045 | AGUGCAA |
| ENSG00000197045 | AUGGCUU |
| ENSG00000197045 | CCUUCAU |
| ENSG00000197045 | CUAGUCC |
| ENSG00000197045 | GCACCAU |
| ENSG00000197045 | GCAGGAC |
| ENSG00000197045 | GGAAUGU |
| ENSG00000197045 | GUGCAAA |
| ENSG00000197045 | UAAGACU |
| ENSG00000197061 | GGCCUG  |
| ENSG00000197063 | AAAAACC |
| ENSG00000197063 | AAAAGUA |
| ENSG00000197063 | AAAGUAA |
| ENSG00000197063 | AAAGUUU |
| ENSG00000197063 | AACUCUA |
| ENSG00000197063 | AAUACUG |
| ENSG00000197063 | ACCACAG |
| ENSG00000197063 | ACCAGCA |
| ENSG00000197063 | AGCAAAA |
| ENSG00000197063 | AGCACCA |
| ENSG00000197063 | AGUGCAA |
| ENSG00000197063 | AUACAAG |
| ENSG00000197063 | AUGUCUG |
| ENSG00000197063 | CACCAGC |
| ENSG00000197063 | CAGCAGA |
| ENSG00000197063 | CAGUGCA |
| ENSG00000197063 | CUGCAGG |

|                 |         |
|-----------------|---------|
| ENSG00000197063 | CUGGACU |
| ENSG00000197063 | GGAAGAC |
| ENSG00000197063 | GGCACGG |
| ENSG00000197063 | GGUUUAC |
| ENSG00000197063 | GUAAACA |
| ENSG00000197063 | GUGCUUG |
| ENSG00000197063 | GUUAAUG |
| ENSG00000197063 | UAUAAAG |
| ENSG00000197063 | UGCAAAG |
| ENSG00000197063 | UGCAGCU |
| ENSG00000197063 | UUGGUCC |
| ENSG00000197063 | UUUUUGC |
| ENSG00000197070 | AAGGCAC |
| ENSG00000197070 | UCCUGAG |
| ENSG00000197081 | AAGUCUU |
| ENSG00000197081 | AAUACUG |
| ENSG00000197081 | ACAGUAC |
| ENSG00000197081 | ACAGUAU |
| ENSG00000197081 | AGCAGCA |
| ENSG00000197081 | AUAUUAU |
| ENSG00000197081 | CUUUGGU |
| ENSG00000197081 | GGAGAGA |
| ENSG00000197081 | UACAGUU |
| ENSG00000197081 | UCCCUUG |
| ENSG00000197081 | UUGGUUC |
| ENSG00000197106 | AAAAAUC |
| ENSG00000197106 | AACACUG |
| ENSG00000197106 | AAGAACC |
| ENSG00000197106 | AAUACUG |
| ENSG00000197106 | ACAAUAU |
| ENSG00000197106 | ACAGUAU |
| ENSG00000197106 | AGCUGCC |
| ENSG00000197106 | AUAAUAC |
| ENSG00000197106 | AUACAAG |
| ENSG00000197106 | CACCACC |
| ENSG00000197106 | CACCAGC |
| ENSG00000197106 | CCCCUGG |
| ENSG00000197106 | CCCUGAG |
| ENSG00000197106 | CCCUGUU |
| ENSG00000197106 | CUACAAA |
| ENSG00000197106 | CUGGAAA |
| ENSG00000197106 | GAGGAUA |
| ENSG00000197106 | GCUGGUG |
| ENSG00000197106 | GGCAGUG |
| ENSG00000197106 | GGGUUUA |
| ENSG00000197106 | GUCAUUG |
| ENSG00000197106 | GUGCUUG |
| ENSG00000197106 | UAUAAUA |
| ENSG00000197106 | UAUUGCU |
| ENSG00000197106 | UCUGGAA |
| ENSG00000197111 | AAAAAUC |
| ENSG00000197111 | ACAUUAC |
| ENSG00000197111 | ACCUGGA |
| ENSG00000197111 | CAGUCCA |
| ENSG00000197111 | UAUAAAG |
| ENSG00000197114 | AAUCACU |
| ENSG00000197121 | AAGGCAC |
| ENSG00000197121 | AAGUAGC |
| ENSG00000197121 | AAUCACU |
| ENSG00000197121 | CACAGUG |
| ENSG00000197121 | CAUGGGU |
| ENSG00000197121 | CUGACUC |
| ENSG00000197121 | CUUCUCU |
| ENSG00000197121 | CUUUGGU |

|                 |         |
|-----------------|---------|
| ENSG00000197121 | GAGGUAU |
| ENSG00000197121 | GGCAGCG |
| ENSG00000197121 | GGGUUUA |
| ENSG00000197121 | UCACAGU |
| ENSG00000197121 | UCAUUUG |
| ENSG00000197121 | UCCAGAG |
| ENSG00000197121 | UCCCUUU |
| ENSG00000197121 | UGCAAAG |
| ENSG00000197121 | UUGGUCC |
| ENSG00000197121 | UUUGCAA |
| ENSG00000197122 | AAAGUAU |
| ENSG00000197122 | AAAUUUC |
| ENSG00000197122 | ACAAUAU |
| ENSG00000197122 | ACAGUAU |
| ENSG00000197122 | CACUGUU |
| ENSG00000197122 | CAGACAG |
| ENSG00000197122 | CUGGCUC |
| ENSG00000197122 | CUUUGGU |
| ENSG00000197122 | GGCAAGA |
| ENSG00000197122 | GGCGGGG |
| ENSG00000197122 | UCCUGAG |
| ENSG00000197122 | UGCAUAG |
| ENSG00000197122 | UGGGGGA |
| ENSG00000197122 | UUGUGUC |
| ENSG00000197128 | AUGGCUU |
| ENSG00000197136 | UAGGGCC |
| ENSG00000197136 | UGGCCAC |
| ENSG00000197140 | GAAGGAA |
| ENSG00000197142 | AAACUGU |
| ENSG00000197142 | CUGGAAA |
| ENSG00000197147 | UCACAAG |
| ENSG00000197153 | AAAGAGC |
| ENSG00000197157 | AAAGCUG |
| ENSG00000197157 | CAGACAG |
| ENSG00000197157 | CUGGGGG |
| ENSG00000197170 | AAAAACC |
| ENSG00000197177 | CAUGGAU |
| ENSG00000197177 | GUUCAUG |
| ENSG00000197183 | GGAGUGU |
| ENSG00000197217 | CCCUGAG |
| ENSG00000197217 | GAGGCAG |
| ENSG00000197226 | AAGGCAC |
| ENSG00000197226 | AUGAGCU |
| ENSG00000197226 | CUGCAGG |
| ENSG00000197226 | GGACCUG |
| ENSG00000197226 | UGAAAUG |
| ENSG00000197245 | CUCCAC  |
| ENSG00000197245 | UCCACC  |
| ENSG00000197256 | AAGUGUG |
| ENSG00000197256 | CGUACCG |
| ENSG00000197256 | GAGAAGA |
| ENSG00000197256 | GGAGGAG |
| ENSG00000197256 | UCAUUUG |
| ENSG00000197256 | UCUCAAG |
| ENSG00000197273 | CUGGAAA |
| ENSG00000197273 | GGUUUAC |
| ENSG00000197273 | UCUGGAA |
| ENSG00000197283 | ACACACC |
| ENSG00000197283 | ACACACU |
| ENSG00000197283 | ACAGUAU |
| ENSG00000197283 | ACUCCAG |
| ENSG00000197283 | AUGGCUU |
| ENSG00000197283 | CACAGGG |
| ENSG00000197283 | CACCACC |

|                 |          |
|-----------------|----------|
| ENSG00000197283 | CUCUGGG  |
| ENSG00000197283 | GAGAAAU  |
| ENSG00000197283 | GAGCCC   |
| ENSG00000197283 | GAGGCAG  |
| ENSG00000197283 | GAUAUGU  |
| ENSG00000197283 | GGAAGCC  |
| ENSG00000197283 | GGAGAGA  |
| ENSG00000197283 | GGGCCCC  |
| ENSG00000197283 | GGUGGUU  |
| ENSG00000197283 | UCACAUU  |
| ENSG00000197283 | UGUGCGU  |
| ENSG00000197283 | UCCUAG   |
| ENSG00000197283 | UUGGAGG  |
| ENSG00000197312 | GAGGUAU  |
| ENSG00000197312 | GUGAGGU  |
| ENSG00000197321 | AAGGCAC  |
| ENSG00000197321 | CUAUACA  |
| ENSG00000197321 | GAGAUGA  |
| ENSG00000197323 | AAGACAU  |
| ENSG00000197323 | AAUCACU  |
| ENSG00000197323 | AAUGUUG  |
| ENSG00000197323 | AGCUUUAU |
| ENSG00000197323 | CAAAGUG  |
| ENSG00000197323 | UAUUGCU  |
| ENSG00000197323 | UCCUAUA  |
| ENSG00000197324 | GGAGUGU  |
| ENSG00000197324 | UUGGCAA  |
| ENSG00000197329 | GUAAACA  |
| ENSG00000197329 | UGCAUUAU |
| ENSG00000197343 | ACAAGGU  |
| ENSG00000197343 | CACACCU  |
| ENSG00000197343 | GCUGGUG  |
| ENSG00000197343 | UCAACAG  |
| ENSG00000197343 | UCAAGUA  |
| ENSG00000197375 | AAGGCAC  |
| ENSG00000197375 | AAGUGCU  |
| ENSG00000197375 | CAGGUGA  |
| ENSG00000197375 | GUAAACA  |
| ENSG00000197375 | UUGAUCA  |
| ENSG00000197375 | UUGGCAA  |
| ENSG00000197380 | AAAGAGG  |
| ENSG00000197380 | CUGCAGG  |
| ENSG00000197380 | CUUUGGU  |
| ENSG00000197380 | GACCCUG  |
| ENSG00000197380 | GGGUCUU  |
| ENSG00000197380 | GUGAAUG  |
| ENSG00000197381 | AAUUAUU  |
| ENSG00000197381 | ACUCAGC  |
| ENSG00000197381 | ACUCAGG  |
| ENSG00000197381 | CAGUAGU  |
| ENSG00000197381 | GACCUGG  |
| ENSG00000197381 | GGAAGCC  |
| ENSG00000197381 | GUGCUUG  |
| ENSG00000197381 | UCCUGAG  |
| ENSG00000197381 | UGUGCUU  |
| ENSG00000197386 | AAAUCCC  |
| ENSG00000197386 | AAUCUCA  |
| ENSG00000197386 | AAUUUUA  |
| ENSG00000197386 | AGGCAGG  |
| ENSG00000197386 | AGGGAGG  |
| ENSG00000197386 | CACAGUG  |
| ENSG00000197386 | CAGGCUC  |
| ENSG00000197386 | GCAGCAU  |
| ENSG00000197386 | GGAGGCA  |

|                 |          |
|-----------------|----------|
| ENSG00000197386 | GGCAGGG  |
| ENSG00000197386 | UAUUGCU  |
| ENSG00000197386 | UCACAGU  |
| ENSG00000197386 | UGAGAAG  |
| ENSG00000197406 | ACAGGUG  |
| ENSG00000197406 | CAGCAGA  |
| ENSG00000197406 | CAGCAGG  |
| ENSG00000197406 | GGCUCAG  |
| ENSG00000197409 | AAAGAGC  |
| ENSG00000197417 | GGAAGCC  |
| ENSG00000197417 | GGGAUCG  |
| ENSG00000197429 | AAAAAUC  |
| ENSG00000197429 | UGCAAAG  |
| ENSG00000197429 | UUCAAAU  |
| ENSG00000197429 | UUUCAAC  |
| ENSG00000197429 | UUUGCAA  |
| ENSG00000197430 | UCCUCGU  |
| ENSG00000197430 | UUCUAAU  |
| ENSG00000197442 | AACUGGU  |
| ENSG00000197442 | AAUACUG  |
| ENSG00000197442 | UCACAUU  |
| ENSG00000197444 | CUUCACC  |
| ENSG00000197444 | UGGUACC  |
| ENSG00000197448 | AAGGCAC  |
| ENSG00000197451 | AAAAGUA  |
| ENSG00000197451 | AAAGGUA  |
| ENSG00000197451 | AAAGUAC  |
| ENSG00000197451 | AACACUG  |
| ENSG00000197451 | ACAGUAC  |
| ENSG00000197451 | ACAGUAU  |
| ENSG00000197451 | ACAUUAC  |
| ENSG00000197457 | CCCUGAG  |
| ENSG00000197457 | CUGGGGG  |
| ENSG00000197457 | GAGAUGA  |
| ENSG00000197457 | GGCUCUG  |
| ENSG00000197461 | ACAAUUAU |
| ENSG00000197461 | CAGGAAC  |
| ENSG00000197461 | GCUACAU  |
| ENSG00000197461 | GGAAUGU  |
| ENSG00000197461 | GUAACAG  |
| ENSG00000197461 | GUCUCUG  |
| ENSG00000197461 | UACAAAG  |
| ENSG00000197461 | UAUGGUU  |
| ENSG00000197461 | UCACAUU  |
| ENSG00000197461 | UGCAUAG  |
| ENSG00000197461 | UUGUUCG  |
| ENSG00000197467 | AAAAAUC  |
| ENSG00000197467 | UUGGCAC  |
| ENSG00000197471 | AAAUUUC  |
| ENSG00000197471 | CCUUCUU  |
| ENSG00000197471 | UUCCUCG  |
| ENSG00000197520 | GAGAAAU  |
| ENSG00000197535 | AAGGCAC  |
| ENSG00000197535 | AGUGCCG  |
| ENSG00000197535 | CAGGUGA  |
| ENSG00000197535 | CCAGUGC  |
| ENSG00000197535 | CCAGUGU  |
| ENSG00000197535 | GAGAAAU  |
| ENSG00000197535 | GGGUCUU  |
| ENSG00000197535 | GUCUGCC  |
| ENSG00000197535 | UGCAUAG  |
| ENSG00000197535 | UGUCUGC  |
| ENSG00000197535 | UUAGAGA  |
| ENSG00000197535 | UUGGUUC  |

|                 |         |
|-----------------|---------|
| ENSG00000197557 | CUUCACC |
| ENSG00000197557 | CUUGUGU |
| ENSG00000197557 | GUUAAUG |
| ENSG00000197557 | UCAUUUG |
| ENSG00000197557 | UUCAAGC |
| ENSG00000197557 | UUCUAAU |
| ENSG00000197562 | AAAAAUC |
| ENSG00000197562 | ACUGUAG |
| ENSG00000197562 | AGCACCA |
| ENSG00000197562 | GAGGUAG |
| ENSG00000197562 | GUAGUGU |
| ENSG00000197562 | UACAAAG |
| ENSG00000197565 | ACCUGGA |
| ENSG00000197565 | CCUUCUU |
| ENSG00000197565 | GAGGUAU |
| ENSG00000197565 | GUCUCUG |
| ENSG00000197576 | AGCUGCC |
| ENSG00000197576 | UACAGUU |
| ENSG00000197584 | GAGCCCC |
| ENSG00000197584 | GAUAUGU |
| ENSG00000197584 | GGCUCAG |
| ENSG00000197584 | UACAGUU |
| ENSG00000197584 | UGCAUAG |
| ENSG00000197584 | UGGCUGC |
| ENSG00000197584 | UUGGCAA |
| ENSG00000197587 | GCCUGGG |
| ENSG00000197587 | GGAGGAG |
| ENSG00000197587 | GGGGUCC |
| ENSG00000197587 | UGAAAGG |
| ENSG00000197594 | CAAAGUG |
| ENSG00000197594 | CCUUCUG |
| ENSG00000197594 | CCUUCUU |
| ENSG00000197594 | CUUUGGU |
| ENSG00000197594 | UCCCUGU |
| ENSG00000197594 | UGUCUUU |
| ENSG00000197601 | AAAGAAU |
| ENSG00000197601 | AGAUGUG |
| ENSG00000197601 | UACAAAG |
| ENSG00000197601 | UCCAGAG |
| ENSG00000197601 | UUGGUUC |
| ENSG00000197614 | GACAACU |
| ENSG00000197614 | UGGACUG |
| ENSG00000197622 | AAAAGUA |
| ENSG00000197622 | AGGAGCU |
| ENSG00000197622 | AGGGAGG |
| ENSG00000197622 | CAGCAA  |
| ENSG00000197622 | CAGUCCA |
| ENSG00000197622 | CCAGGAG |
| ENSG00000197622 | CCCUGAG |
| ENSG00000197622 | CCUGCUG |
| ENSG00000197622 | CUCCAGC |
| ENSG00000197622 | CUCUUCC |
| ENSG00000197622 | GAGGUAG |
| ENSG00000197622 | GGAGUCC |
| ENSG00000197622 | UGAGUCU |
| ENSG00000197629 | UCCCACA |
| ENSG00000197635 | AGCACCA |
| ENSG00000197646 | AGUGCUU |
| ENSG00000197646 | CUGGAAA |
| ENSG00000197651 | ACUAGAU |
| ENSG00000197651 | AGAUGUG |
| ENSG00000197651 | CAGUUAC |
| ENSG00000197651 | CUCCAUI |
| ENSG00000197651 | GACCAUG |



|                 |         |
|-----------------|---------|
| ENSG00000197651 | GCAACUU |
| ENSG00000197651 | GUGCAAA |
| ENSG00000197651 | UCAUACA |
| ENSG00000197694 | AGCACCA |
| ENSG00000197694 | GCACCAU |
| ENSG00000197697 | AAAGAGC |
| ENSG00000197702 | AUGUGCC |
| ENSG00000197702 | AUGUGGG |
| ENSG00000197702 | CCCUGUU |
| ENSG00000197702 | CUCCAUU |
| ENSG00000197702 | CUGUUGA |
| ENSG00000197702 | GAGCCCU |
| ENSG00000197702 | GCAGGAC |
| ENSG00000197702 | GGACCUG |
| ENSG00000197702 | GUGCCUG |
| ENSG00000197702 | UACAAAG |
| ENSG00000197702 | UCCCUGU |
| ENSG00000197702 | UUUGCAA |
| ENSG00000197702 | UUUGCAC |
| ENSG00000197705 | AUAAAGU |
| ENSG00000197705 | AUCCUUU |
| ENSG00000197705 | CAGUCUG |
| ENSG00000197705 | GCAGGUU |
| ENSG00000197705 | GUGACAG |
| ENSG00000197705 | UCAUUUG |
| ENSG00000197705 | UUCUAAU |
| ENSG00000197712 | GAGAAAU |
| ENSG00000197713 | AAAGUUU |
| ENSG00000197713 | AAGUUGU |
| ENSG00000197713 | AUAUUAU |
| ENSG00000197713 | AUGUAAU |
| ENSG00000197713 | GUCCAGA |
| ENSG00000197724 | AAGGUGC |
| ENSG00000197724 | ACAAGGU |
| ENSG00000197724 | ACAUUCA |
| ENSG00000197724 | CUACAAA |
| ENSG00000197724 | GAGAAAU |
| ENSG00000197724 | GCCUGAU |
| ENSG00000197724 | GCUACAU |
| ENSG00000197724 | UCACAAG |
| ENSG00000197746 | ACAUUCA |
| ENSG00000197746 | AGGAGCU |
| ENSG00000197757 | AGGGAGG |
| ENSG00000197757 | CACAGUG |
| ENSG00000197757 | CCCCAG  |
| ENSG00000197757 | GGAGGAG |
| ENSG00000197757 | GGGGCAG |
| ENSG00000197757 | GUGCCAC |
| ENSG00000197757 | UAAUAUC |
| ENSG00000197757 | UCACAGU |
| ENSG00000197757 | UGUGCGG |
| ENSG00000197771 | ACCCUGU |
| ENSG00000197771 | AGCACCA |
| ENSG00000197771 | CCCUGUU |
| ENSG00000197771 | CUAGUCC |
| ENSG00000197771 | GGUCUAG |
| ENSG00000197771 | UUUCAAC |
| ENSG00000197776 | AUAUAAC |
| ENSG00000197779 | AUGCAUU |
| ENSG00000197779 | CACAAUG |
| ENSG00000197779 | GAAGGUC |
| ENSG00000197798 | AAAAACC |
| ENSG00000197798 | AAAACUG |
| ENSG00000197798 | ACUGUAG |

|                 |         |
|-----------------|---------|
| ENSG00000197798 | CAAAACU |
| ENSG00000197798 | CCUUCAU |
| ENSG00000197798 | UCAAGUA |
| ENSG00000197808 | UCAUUUG |
| ENSG00000197818 | AAAGGUA |
| ENSG00000197818 | AACAUUC |
| ENSG00000197818 | ACAUUCA |
| ENSG00000197818 | UCCCUCU |
| ENSG00000197846 | AAAGAGC |
| ENSG00000197846 | GGCUCUG |
| ENSG00000197859 | AAAGUGC |
| ENSG00000197860 | AAGACAU |
| ENSG00000197860 | AAGUGCA |
| ENSG00000197860 | ACAUUCA |
| ENSG00000197860 | AGUGCAA |
| ENSG00000197860 | AUAAAGU |
| ENSG00000197860 | CCAGUAC |
| ENSG00000197860 | UGGUACC |
| ENSG00000197860 | UUCUAAU |
| ENSG00000197879 | AAGGUGC |
| ENSG00000197879 | ACAAGGU |
| ENSG00000197879 | AGCAGCA |
| ENSG00000197879 | AUAAAGU |
| ENSG00000197879 | AUGGCUU |
| ENSG00000197879 | CAGACAG |
| ENSG00000197879 | CAGCAGA |
| ENSG00000197879 | CAGCAGG |
| ENSG00000197879 | CCCACCU |
| ENSG00000197879 | CCUGUU  |
| ENSG00000197879 | CGGCCUG |
| ENSG00000197879 | CUCUGGG |
| ENSG00000197879 | GAGUCUU |
| ENSG00000197879 | GGCAGUG |
| ENSG00000197879 | GUGGCC  |
| ENSG00000197879 | UAUAAAG |
| ENSG00000197879 | UAUUGCU |
| ENSG00000197879 | UCCUGU  |
| ENSG00000197879 | UCUGGAA |
| ENSG00000197879 | UGUCUGG |
| ENSG00000197879 | UUGGCAA |
| ENSG00000197879 | UUGGCAC |
| ENSG00000197892 | CACCAGC |
| ENSG00000197892 | CUUUGGU |
| ENSG00000197892 | GGAUUUC |
| ENSG00000197892 | GUGCAA  |
| ENSG00000197894 | GAAAACA |
| ENSG00000197921 | AUCCUUU |
| ENSG00000197921 | CUACAAA |
| ENSG00000197921 | GACUCC  |
| ENSG00000197921 | GAGGAUA |
| ENSG00000197921 | UCACAAG |
| ENSG00000197921 | UCAUAGA |
| ENSG00000197930 | GAGGUAG |
| ENSG00000197930 | UACAAAG |
| ENSG00000197930 | UUGAGGC |
| ENSG00000197930 | UUGGCAC |
| ENSG00000197933 | UCCCACA |
| ENSG00000197948 | AGCACCA |
| ENSG00000197948 | CAGCUGG |
| ENSG00000197948 | CCAUUAC |
| ENSG00000197948 | CUGGCUC |
| ENSG00000197948 | GACCCUG |
| ENSG00000197948 | GCAGCAU |
| ENSG00000197948 | GGGAGCU |

|                 |         |
|-----------------|---------|
| ENSG00000197948 | GGGCCCC |
| ENSG00000197948 | UGAGUCU |
| ENSG00000197951 | AACUCUA |
| ENSG00000197959 | ACAAUAU |
| ENSG00000197959 | AGCACCA |
| ENSG00000197959 | AGCUGCC |
| ENSG00000197959 | CAAAUGC |
| ENSG00000197959 | CACAAUG |
| ENSG00000197959 | GCUGUCU |
| ENSG00000197959 | GGUUACC |
| ENSG00000197959 | UCACAAG |
| ENSG00000197959 | UCCAGUU |
| ENSG00000197959 | UCUCACC |
| ENSG00000197959 | UGACAUC |
| ENSG00000197959 | UGAGAAG |
| ENSG00000197959 | UGAGAAU |
| ENSG00000197959 | UGCAUAG |
| ENSG00000197959 | UUGACAC |
| ENSG00000197965 | AAAGUAC |
| ENSG00000197965 | AAGGCAC |
| ENSG00000197965 | UCACAAG |
| ENSG00000197965 | UCCAGUU |
| ENSG00000197965 | UCCCUCU |
| ENSG00000197965 | UCCUUGC |
| ENSG00000197971 | AUGCCUU |
| ENSG00000197971 | CAAAACU |
| ENSG00000197971 | CACAAUG |
| ENSG00000197971 | GGGUGUU |
| ENSG00000197977 | AUACAAG |
| ENSG00000197977 | GGUUUAC |
| ENSG00000197982 | ACCUGGA |
| ENSG00000197982 | CUGCAGC |
| ENSG00000197982 | UGAAAUG |
| ENSG00000197991 | AUGCCUU |
| ENSG00000198000 | ACAUUCA |
| ENSG00000198010 | AAAGUGC |
| ENSG00000198010 | AACAAAC |
| ENSG00000198010 | AACUACU |
| ENSG00000198010 | AAGAACC |
| ENSG00000198010 | AAUGCCC |
| ENSG00000198010 | AAUUGCU |
| ENSG00000198010 | ACCCUGU |
| ENSG00000198010 | ACUCAGG |
| ENSG00000198010 | ACUGCAG |
| ENSG00000198010 | ACUGCAU |
| ENSG00000198010 | AGCAGCA |
| ENSG00000198010 | AGCAGCG |
| ENSG00000198010 | AGCAGCU |
| ENSG00000198010 | AGCCCUU |
| ENSG00000198010 | AGCUGCC |
| ENSG00000198010 | AGGACAC |
| ENSG00000198010 | AGGUAGU |
| ENSG00000198010 | AUACAAG |
| ENSG00000198010 | AUGCACC |
| ENSG00000198010 | AUGGCUU |
| ENSG00000198010 | CAAAGUG |
| ENSG00000198010 | CAGCAA  |
| ENSG00000198010 | CAGCAGG |
| ENSG00000198010 | CUCAAAC |
| ENSG00000198010 | CUCUGGG |
| ENSG00000198010 | CUGGGGG |
| ENSG00000198010 | CUUGUGU |
| ENSG00000198010 | GAAAACA |
| ENSG00000198010 | GAGAACC |

|                 |         |
|-----------------|---------|
| ENSG00000198010 | GAGCCCC |
| ENSG00000198010 | GAGCCCU |
| ENSG00000198010 | GAGGCUG |
| ENSG00000198010 | GCUUCCU |
| ENSG00000198010 | UAGGCCG |
| ENSG00000198010 | UAUAAAG |
| ENSG00000198010 | UCACAUU |
| ENSG00000198010 | UCAUUUG |
| ENSG00000198010 | UCCUUGC |
| ENSG00000198010 | UCUCAAG |
| ENSG00000198010 | UGCAUUG |
| ENSG00000198010 | UUGGCAA |
| ENSG00000198018 | GAGAAGA |
| ENSG00000198018 | GUCUCUG |
| ENSG00000198026 | AGCCUGC |
| ENSG00000198026 | CUGGCUC |
| ENSG00000198046 | CUUUGGU |
| ENSG00000198053 | AAAGUGC |
| ENSG00000198053 | AAAGUUU |
| ENSG00000198053 | AAGUGCU |
| ENSG00000198053 | AAGUUGU |
| ENSG00000198053 | ACCACAG |
| ENSG00000198053 | AGUGCUU |
| ENSG00000198053 | AUACAAG |
| ENSG00000198053 | AUUGCAC |
| ENSG00000198053 | CUCUUCC |
| ENSG00000198053 | GCAACUU |
| ENSG00000198053 | GGAGAGA |
| ENSG00000198053 | UACAAAG |
| ENSG00000198053 | UCAACAG |
| ENSG00000198053 | UCACAUU |
| ENSG00000198053 | UCCAGUU |
| ENSG00000198053 | UUCAAGC |
| ENSG00000198053 | UUCUAAU |
| ENSG00000198053 | UUUGCAC |
| ENSG00000198055 | AAAAAUC |
| ENSG00000198055 | AAAACUG |
| ENSG00000198055 | AAACUGU |
| ENSG00000198055 | AACACUG |
| ENSG00000198055 | ACUCAGC |
| ENSG00000198055 | CAAAACU |
| ENSG00000198055 | CACAGUG |
| ENSG00000198055 | GGAAUGU |
| ENSG00000198055 | GUAAACA |
| ENSG00000198055 | UAUUGCU |
| ENSG00000198055 | UCACAGU |
| ENSG00000198055 | UUGGCAA |
| ENSG00000198055 | UUGGCAC |
| ENSG00000198060 | AAGGUGC |
| ENSG00000198060 | AGCAGCA |
| ENSG00000198060 | AGCCAGU |
| ENSG00000198060 | AUGCAUU |
| ENSG00000198060 | CACAGUG |
| ENSG00000198060 | CUUCACC |
| ENSG00000198060 | UCACAAG |
| ENSG00000198060 | UCACAGG |
| ENSG00000198081 | AAAGUGC |
| ENSG00000198081 | AAGUGCA |
| ENSG00000198081 | CAAAGCA |
| ENSG00000198081 | CAGCAA  |
| ENSG00000198081 | UGAAAUG |
| ENSG00000198087 | AGCAGCG |
| ENSG00000198087 | AGCAGCU |
| ENSG00000198087 | AGUGCAA |

|                 |         |
|-----------------|---------|
| ENSG00000198087 | AUUGCAC |
| ENSG00000198087 | CACAGUG |
| ENSG00000198087 | CAGCAAA |
| ENSG00000198087 | CAGUAGA |
| ENSG00000198087 | GAUUGUA |
| ENSG00000198087 | GCAACUU |
| ENSG00000198087 | GCUACAU |
| ENSG00000198087 | GUCAUUG |
| ENSG00000198087 | UCACAGU |
| ENSG00000198087 | UCCUAUA |
| ENSG00000198088 | ACUGCAG |
| ENSG00000198089 | AAUUGCU |
| ENSG00000198089 | AUUCAUU |
| ENSG00000198089 | UCAUUUG |
| ENSG00000198089 | UGAAAUG |
| ENSG00000198105 | AGGUAGU |
| ENSG00000198105 | CUUUGGU |
| ENSG00000198105 | GGCAGUG |
| ENSG00000198108 | CCAGUAC |
| ENSG00000198108 | GGAAGAC |
| ENSG00000198108 | UCACAUU |
| ENSG00000198108 | UGGUACC |
| ENSG00000198121 | AAGUCUU |
| ENSG00000198121 | UGCCUG  |
| ENSG00000198121 | UUCUAAU |
| ENSG00000198131 | CACAAUG |
| ENSG00000198131 | CUCCAGC |
| ENSG00000198142 | AAAGUGC |
| ENSG00000198142 | AGCACCA |
| ENSG00000198142 | AGCAGCA |
| ENSG00000198142 | AGUGCUU |
| ENSG00000198142 | AUAAAGU |
| ENSG00000198142 | CAGUAGA |
| ENSG00000198142 | GCACCAU |
| ENSG00000198142 | GCAGCAU |
| ENSG00000198142 | UAAUAUC |
| ENSG00000198142 | UUCAAGC |
| ENSG00000198142 | UCCCAUA |
| ENSG00000198142 | UUCUGCA |
| ENSG00000198142 | UUUCAAC |
| ENSG00000198146 | ACAGGUG |
| ENSG00000198146 | AGUGGUU |
| ENSG00000198146 | AUCACUA |
| ENSG00000198146 | CCCUGUU |
| ENSG00000198146 | GUAAACA |
| ENSG00000198146 | UAUUGCU |
| ENSG00000198146 | UCAUACA |
| ENSG00000198146 | UUGACAC |
| ENSG00000198160 | AAAGUAA |
| ENSG00000198160 | AAAUUUC |
| ENSG00000198160 | AAUACUG |
| ENSG00000198160 | ACUGUUU |
| ENSG00000198160 | AGUGCUU |
| ENSG00000198160 | AUGCAUU |
| ENSG00000198160 | CACUGUU |
| ENSG00000198160 | GCCUGAU |
| ENSG00000198160 | GGCUGCG |
| ENSG00000198160 | UACAGUU |
| ENSG00000198160 | UCUGGAA |
| ENSG00000198160 | UCUGGAG |
| ENSG00000198160 | UGGAUAA |
| ENSG00000198160 | UGGCUGC |
| ENSG00000198160 | UGUCUUU |
| ENSG00000198160 | UGUUGAA |

|                 |         |
|-----------------|---------|
| ENSG00000198160 | UUCAAAU |
| ENSG00000198162 | ACAGGUG |
| ENSG00000198162 | CAAAGUG |
| ENSG00000198162 | CAGGUGA |
| ENSG00000198162 | CAGUCUG |
| ENSG00000198162 | GUCUCUG |
| ENSG00000198162 | UGAAAUG |
| ENSG00000198162 | UUCAAGC |
| ENSG00000198162 | UUGGUCC |
| ENSG00000198168 | AAGGCAC |
| ENSG00000198168 | AGCCCUU |
| ENSG00000198168 | GGCAGUG |
| ENSG00000198176 | AACAUUC |
| ENSG00000198176 | ACCAGCA |
| ENSG00000198176 | AUAUAAC |
| ENSG00000198176 | AUGUAAU |
| ENSG00000198176 | CACCAGC |
| ENSG00000198176 | UCCUGAG |
| ENSG00000198182 | CUCUGGG |
| ENSG00000198182 | GAGUUGG |
| ENSG00000198182 | GCUUCCU |
| ENSG00000198182 | GGAGGAG |
| ENSG00000198182 | GGAUGAG |
| ENSG00000198182 | UCUCCAA |
| ENSG00000198183 | CAGCAGA |
| ENSG00000198198 | UGAGAAG |
| ENSG00000198211 | AAUACUG |
| ENSG00000198216 | AGCAGCA |
| ENSG00000198216 | AGCCCUU |
| ENSG00000198216 | AGGGAGG |
| ENSG00000198216 | AUGGCAC |
| ENSG00000198216 | AUGGCUU |
| ENSG00000198216 | CAGCAA  |
| ENSG00000198216 | CUCUCC  |
| ENSG00000198216 | CUUUGGU |
| ENSG00000198216 | GAGAAGA |
| ENSG00000198216 | GAGGCAG |
| ENSG00000198216 | GAGGUAG |
| ENSG00000198216 | GAGGUAU |
| ENSG00000198216 | GGGGAGC |
| ENSG00000198216 | GGGGGAA |
| ENSG00000198216 | UGCAAAG |
| ENSG00000198216 | UGCCUG  |
| ENSG00000198216 | UUGGUUC |
| ENSG00000198218 | UGUAUGU |
| ENSG00000198221 | UUUGCAA |
| ENSG00000198231 | AAAGAAU |
| ENSG00000198231 | AGCAAAA |
| ENSG00000198231 | CCCUGAG |
| ENSG00000198231 | UCACAAG |
| ENSG00000198242 | CAGCUGG |
| ENSG00000198242 | CUGGACU |
| ENSG00000198252 | AAAACUG |
| ENSG00000198252 | AAAGUAC |
| ENSG00000198252 | AAAGUAU |
| ENSG00000198252 | AAGGCAC |
| ENSG00000198252 | AUACCUC |
| ENSG00000198252 | CAAAGCA |
| ENSG00000198252 | GGAAGCC |
| ENSG00000198252 | UAUAAAG |
| ENSG00000198252 | UAUUGCU |
| ENSG00000198252 | UGCAUUG |
| ENSG00000198252 | UUCAAGC |
| ENSG00000198252 | UUUGCAA |

|                 |          |
|-----------------|----------|
| ENSG00000198265 | AAAUGGU  |
| ENSG00000198265 | ACAGUUAU |
| ENSG00000198265 | ACAUCAC  |
| ENSG00000198265 | ACUGGAU  |
| ENSG00000198265 | AGGCAGG  |
| ENSG00000198265 | AUCAUAC  |
| ENSG00000198265 | CAGCAA   |
| ENSG00000198265 | CCAGCAU  |
| ENSG00000198265 | CCAGUAC  |
| ENSG00000198265 | CUGUUGA  |
| ENSG00000198265 | GAGAAAU  |
| ENSG00000198265 | GGCAAGA  |
| ENSG00000198265 | GUAACAG  |
| ENSG00000198265 | GUCUACU  |
| ENSG00000198265 | UGCAUAG  |
| ENSG00000198265 | UGGAGAU  |
| ENSG00000198265 | UGUUGAA  |
| ENSG00000198265 | UUUGCAA  |
| ENSG00000198286 | UAAUGCU  |
| ENSG00000198301 | CUUGUAU  |
| ENSG00000198301 | GUAACAG  |
| ENSG00000198315 | AAAAAUC  |
| ENSG00000198315 | AAGUCAC  |
| ENSG00000198315 | AGUGCCU  |
| ENSG00000198315 | AGUGCUG  |
| ENSG00000198315 | CAAGAGC  |
| ENSG00000198315 | CACCAGC  |
| ENSG00000198315 | GAGUCUU  |
| ENSG00000198315 | GGAGUCC  |
| ENSG00000198315 | GGGGUGG  |
| ENSG00000198315 | GGGUGGU  |
| ENSG00000198315 | GUGCCUG  |
| ENSG00000198315 | UCAAGUA  |
| ENSG00000198315 | UCUCACC  |
| ENSG00000198315 | UGAGUCU  |
| ENSG00000198324 | GUAAACA  |
| ENSG00000198324 | UGAGGAC  |
| ENSG00000198327 | GGCCUG   |
| ENSG00000198353 | AAGAACC  |
| ENSG00000198353 | AUAUUAU  |
| ENSG00000198353 | GACUUC   |
| ENSG00000198353 | GGUUUAC  |
| ENSG00000198355 | AAGGCAC  |
| ENSG00000198355 | ACUCAA   |
| ENSG00000198355 | AGCAGCA  |
| ENSG00000198355 | UGAAAUG  |
| ENSG00000198355 | UGCAUUG  |
| ENSG00000198356 | CUGCCC   |
| ENSG00000198356 | GGGGGAA  |
| ENSG00000198356 | GUGCAA   |
| ENSG00000198363 | AAAAGUA  |
| ENSG00000198363 | AGCAGCA  |
| ENSG00000198363 | GAAUGU   |
| ENSG00000198363 | GGGCAG   |
| ENSG00000198363 | UAUAAAG  |
| ENSG00000198363 | UAUGGUU  |
| ENSG00000198363 | UCACAGG  |
| ENSG00000198363 | UCACAGU  |
| ENSG00000198363 | UGAAGCU  |
| ENSG00000198366 | AAAGAGC  |
| ENSG00000198369 | AAAGCUG  |
| ENSG00000198369 | AACACUG  |
| ENSG00000198369 | AAGAACC  |
| ENSG00000198369 | AAUGUUG  |

|                 |          |
|-----------------|----------|
| ENSG00000198369 | ACACACC  |
| ENSG00000198369 | ACACACU  |
| ENSG00000198369 | ACAGGUG  |
| ENSG00000198369 | ACAUCAC  |
| ENSG00000198369 | AUCAUAC  |
| ENSG00000198369 | CACUGUU  |
| ENSG00000198369 | CUGCAGC  |
| ENSG00000198369 | CUUGUAU  |
| ENSG00000198369 | GAGGCUG  |
| ENSG00000198369 | GAUUGUA  |
| ENSG00000198369 | GAUUGUC  |
| ENSG00000198369 | GCUACAU  |
| ENSG00000198369 | GUGCAAA  |
| ENSG00000198369 | GUGCUUG  |
| ENSG00000198369 | UAUAAAG  |
| ENSG00000198369 | UGCAGCU  |
| ENSG00000198369 | UGUAUAA  |
| ENSG00000198369 | UUGGUUC  |
| ENSG00000198373 | CUGGGGG  |
| ENSG00000198373 | GAUUGUA  |
| ENSG00000198373 | GAUUGUC  |
| ENSG00000198373 | GGCAGGG  |
| ENSG00000198373 | UACAAAG  |
| ENSG00000198373 | UAUUGCU  |
| ENSG00000198374 | AAAGAGC  |
| ENSG00000198380 | AUAUAAAC |
| ENSG00000198380 | UCACAAG  |
| ENSG00000198382 | AAAGAGC  |
| ENSG00000198382 | AAAGAGG  |
| ENSG00000198382 | AAAUGGU  |
| ENSG00000198382 | AAGUGCU  |
| ENSG00000198382 | AAUCUCU  |
| ENSG00000198382 | AUUGCAC  |
| ENSG00000198382 | CAUGGAU  |
| ENSG00000198382 | CCCUGAG  |
| ENSG00000198382 | CUCUGGG  |
| ENSG00000198382 | CUGGAAA  |
| ENSG00000198382 | GCACCAU  |
| ENSG00000198382 | UCACAUU  |
| ENSG00000198382 | UCUGGAA  |
| ENSG00000198382 | UGCAGCU  |
| ENSG00000198382 | UGGAUAA  |
| ENSG00000198382 | UGGGUAC  |
| ENSG00000198393 | UCUGGAA  |
| ENSG00000198399 | AAGGCAC  |
| ENSG00000198399 | AAUACUG  |
| ENSG00000198399 | ACAGUAU  |
| ENSG00000198399 | CACAGUG  |
| ENSG00000198399 | UCCUGAG  |
| ENSG00000198399 | UGCAUUA  |
| ENSG00000198408 | AAAGUGC  |
| ENSG00000198408 | CUACAAA  |
| ENSG00000198408 | GGAGGCA  |
| ENSG00000198408 | UGAAGCU  |
| ENSG00000198420 | CUUUGGU  |
| ENSG00000198420 | UCUUGAG  |
| ENSG00000198420 | UUCUUGU  |
| ENSG00000198431 | CCCUGAG  |
| ENSG00000198431 | CCUUCAU  |
| ENSG00000198431 | GACUUCC  |
| ENSG00000198431 | UUCUUGU  |
| ENSG00000198435 | AAAGGUA  |
| ENSG00000198435 | AAGUGUG  |
| ENSG00000198435 | AGUGCAA  |



|                 |          |
|-----------------|----------|
| ENSG00000198435 | AUGACAC  |
| ENSG00000198435 | GAGGUAG  |
| ENSG00000198435 | GUGCAAA  |
| ENSG00000198435 | GUUAAUG  |
| ENSG00000198435 | UAAUAUC  |
| ENSG00000198440 | GAGGUAU  |
| ENSG00000198455 | AACUCUA  |
| ENSG00000198455 | GGCUCAG  |
| ENSG00000198477 | ACAUUCA  |
| ENSG00000198477 | AGUGCCU  |
| ENSG00000198477 | CAGGAAC  |
| ENSG00000198477 | UUGGCAC  |
| ENSG00000198478 | AGCAGCU  |
| ENSG00000198478 | AUGCAUU  |
| ENSG00000198478 | CCUGCUG  |
| ENSG00000198478 | CUGCUCU  |
| ENSG00000198478 | CUUUGGU  |
| ENSG00000198478 | GACCUGG  |
| ENSG00000198478 | GAGGCAG  |
| ENSG00000198478 | GGGAGCU  |
| ENSG00000198478 | GGGGAGC  |
| ENSG00000198478 | GUAACAG  |
| ENSG00000198478 | UAAGACU  |
| ENSG00000198478 | UAAUAUC  |
| ENSG00000198478 | UCACAGU  |
| ENSG00000198478 | UCCAGUU  |
| ENSG00000198478 | UGAAAUG  |
| ENSG00000198478 | UGGUACC  |
| ENSG00000198478 | UUGGCAA  |
| ENSG00000198492 | AACAUUC  |
| ENSG00000198492 | ACAUUCA  |
| ENSG00000198492 | GUGCAAA  |
| ENSG00000198492 | UCAACAG  |
| ENSG00000198492 | UCUCCAA  |
| ENSG00000198498 | AAUUAUU  |
| ENSG00000198517 | AAAGGUA  |
| ENSG00000198517 | AACAAAC  |
| ENSG00000198517 | ACAGUAC  |
| ENSG00000198517 | ACAGUAU  |
| ENSG00000198517 | AGAUAAA  |
| ENSG00000198517 | AUGGAUU  |
| ENSG00000198517 | AUUGCAC  |
| ENSG00000198517 | GAAAACA  |
| ENSG00000198517 | UACAGUU  |
| ENSG00000198517 | UAUUGCU  |
| ENSG00000198517 | UGAAAUG  |
| ENSG00000198518 | GGCCUG   |
| ENSG00000198522 | AGCAGCA  |
| ENSG00000198522 | CAGCAGA  |
| ENSG00000198522 | CAGCAGG  |
| ENSG00000198554 | AAAUUUC  |
| ENSG00000198558 | GGCCUG   |
| ENSG00000198561 | AAAAACC  |
| ENSG00000198561 | AAGGCAC  |
| ENSG00000198561 | ACACACC  |
| ENSG00000198561 | AGCACCA  |
| ENSG00000198561 | AUAU AAC |
| ENSG00000198561 | AUGUGCC  |
| ENSG00000198561 | CAGCAGA  |
| ENSG00000198561 | CCCACCG  |
| ENSG00000198561 | CCUUCUU  |
| ENSG00000198561 | CUGCAGG  |
| ENSG00000198561 | GAGAAAU  |
| ENSG00000198561 | GAGAUGA  |

|                 |          |
|-----------------|----------|
| ENSG00000198561 | GAGGCAG  |
| ENSG00000198561 | GCAGCAU  |
| ENSG00000198561 | GGAGGCA  |
| ENSG00000198561 | GGAUUUU  |
| ENSG00000198561 | GGCAGUG  |
| ENSG00000198561 | GUAGUGU  |
| ENSG00000198561 | UAUCAGA  |
| ENSG00000198561 | UAUUACC  |
| ENSG00000198561 | UCCAGUU  |
| ENSG00000198561 | UCUCAAG  |
| ENSG00000198561 | UUGGCAC  |
| ENSG00000198561 | UUGGUUC  |
| ENSG00000198563 | CAGUAGU  |
| ENSG00000198563 | CCUUCAU  |
| ENSG00000198563 | CUUCACC  |
| ENSG00000198563 | GGUGGUC  |
| ENSG00000198563 | GGUGGUU  |
| ENSG00000198563 | GUAGUGU  |
| ENSG00000198570 | GGACCUG  |
| ENSG00000198570 | GUGGGGA  |
| ENSG00000198574 | GCUGGUG  |
| ENSG00000198576 | AGGGAGG  |
| ENSG00000198576 | GACCCUG  |
| ENSG00000198576 | UGCCAGC  |
| ENSG00000198586 | AGCAGCG  |
| ENSG00000198586 | AUGGCUU  |
| ENSG00000198586 | CUUUGGU  |
| ENSG00000198586 | GAUUGUA  |
| ENSG00000198586 | GAUUGUC  |
| ENSG00000198586 | GCAGCAU  |
| ENSG00000198586 | UAUUACC  |
| ENSG00000198586 | UGCAUAG  |
| ENSG00000198586 | UUGGUUC  |
| ENSG00000198589 | AAAAAUC  |
| ENSG00000198589 | AAAAGUA  |
| ENSG00000198589 | UACAAAG  |
| ENSG00000198597 | AUGCCUU  |
| ENSG00000198597 | CAAAGCA  |
| ENSG00000198597 | CCUUCAU  |
| ENSG00000198597 | UUCUAAU  |
| ENSG00000198604 | AGUACUG  |
| ENSG00000198604 | UCCUGAG  |
| ENSG00000198612 | CAA AUGC |
| ENSG00000198624 | CCUUCUU  |
| ENSG00000198624 | CUGCAGC  |
| ENSG00000198624 | UCCUGAG  |
| ENSG00000198626 | UACAAAG  |
| ENSG00000198626 | UAUUGCU  |
| ENSG00000198626 | UUCUGCA  |
| ENSG00000198626 | UUGAUCA  |
| ENSG00000198642 | AGCACCA  |
| ENSG00000198642 | AGGGAGG  |
| ENSG00000198642 | GAGGCAG  |
| ENSG00000198642 | GCCCUUA  |
| ENSG00000198642 | UUGGUCC  |
| ENSG00000198642 | UUGUUCG  |
| ENSG00000198643 | AGCAAAA  |
| ENSG00000198643 | CAGCAAA  |
| ENSG00000198648 | AAGGCAC  |
| ENSG00000198648 | AGCUGCC  |
| ENSG00000198648 | AUAUU AU |
| ENSG00000198648 | AUUGCAC  |
| ENSG00000198648 | CACAGUG  |
| ENSG00000198648 | GAGCUGC  |

|                 |          |
|-----------------|----------|
| ENSG00000198648 | GGAAUGU  |
| ENSG00000198648 | GUGCAAA  |
| ENSG00000198648 | UAUAAAG  |
| ENSG00000198648 | UCACAGG  |
| ENSG00000198650 | CCCUGAG  |
| ENSG00000198650 | GAGUGUG  |
| ENSG00000198650 | GUGAGGU  |
| ENSG00000198650 | UUAUGCA  |
| ENSG00000198663 | ACAUUAC  |
| ENSG00000198663 | AGGGAGG  |
| ENSG00000198663 | AGUGCUG  |
| ENSG00000198663 | CUGGACU  |
| ENSG00000198663 | GAGGCUG  |
| ENSG00000198663 | UCUGGAA  |
| ENSG00000198663 | UGCUGAC  |
| ENSG00000198663 | UUAUGCA  |
| ENSG00000198663 | UUCAAAU  |
| ENSG00000198663 | UUCUGCA  |
| ENSG00000198663 | UUGACAC  |
| ENSG00000198668 | AAGUGUG  |
| ENSG00000198668 | AAUGUUG  |
| ENSG00000198668 | AAUUUUA  |
| ENSG00000198668 | ACUUGGA  |
| ENSG00000198668 | AGCAAAA  |
| ENSG00000198668 | AGCAUUC  |
| ENSG00000198668 | AUGACAC  |
| ENSG00000198668 | CAAAGCA  |
| ENSG00000198668 | CCUUCAU  |
| ENSG00000198668 | GAGAUGA  |
| ENSG00000198668 | GAGGUAG  |
| ENSG00000198668 | GAGGUAU  |
| ENSG00000198668 | GGAAUGU  |
| ENSG00000198668 | GUUAAUG  |
| ENSG00000198668 | UCCCUUG  |
| ENSG00000198668 | UCCUGAG  |
| ENSG00000198668 | UGAAAGG  |
| ENSG00000198668 | UGACAUC  |
| ENSG00000198668 | UGACUGU  |
| ENSG00000198668 | UGUGCUU  |
| ENSG00000198668 | UUGACAC  |
| ENSG00000198668 | UUGGUCC  |
| ENSG00000198668 | UUUGCAC  |
| ENSG00000198673 | UAAUACA  |
| ENSG00000198680 | AAUGUUG  |
| ENSG00000198680 | ACACACU  |
| ENSG00000198680 | AUAUUUAU |
| ENSG00000198682 | ACCACAG  |
| ENSG00000198682 | CAGCAAA  |
| ENSG00000198682 | CUCAAAC  |
| ENSG00000198682 | UCAUUUG  |
| ENSG00000198689 | AAAGAGC  |
| ENSG00000198689 | AAGGCAC  |
| ENSG00000198689 | ACAUUCA  |
| ENSG00000198689 | CACUGUU  |
| ENSG00000198689 | CUCUUCC  |
| ENSG00000198689 | CUUCACC  |
| ENSG00000198689 | UGCAUAG  |
| ENSG00000198691 | CAGGUGA  |
| ENSG00000198700 | AGCAGCA  |
| ENSG00000198700 | AGCAGCG  |
| ENSG00000198700 | AUUCAUU  |
| ENSG00000198700 | CAGCAGA  |
| ENSG00000198700 | CAGCAGG  |
| ENSG00000198700 | CUGGACU  |

|                 |          |
|-----------------|----------|
| ENSG00000198700 | CUGGCUC  |
| ENSG00000198700 | GAAUUGU  |
| ENSG00000198700 | GAGGUAG  |
| ENSG00000198700 | GCAGCAU  |
| ENSG00000198700 | GUCACUC  |
| ENSG00000198700 | GUGUCAC  |
| ENSG00000198700 | UAUCAGA  |
| ENSG00000198700 | UCCUAUA  |
| ENSG00000198700 | UCUCAAG  |
| ENSG00000198700 | UGUCUGG  |
| ENSG00000198700 | UUGGCAA  |
| ENSG00000198700 | UUGGCAC  |
| ENSG00000198700 | UUGUUCG  |
| ENSG00000198704 | CAUGGAU  |
| ENSG00000198704 | CUGCUCU  |
| ENSG00000198704 | GACCUGG  |
| ENSG00000198704 | UGGAGAU  |
| ENSG00000198719 | AACAAAC  |
| ENSG00000198719 | ACAAUUA  |
| ENSG00000198719 | ACAUAGA  |
| ENSG00000198719 | AGCAUUC  |
| ENSG00000198719 | AGUGCAA  |
| ENSG00000198719 | AGUGCCU  |
| ENSG00000198719 | AUACAAG  |
| ENSG00000198719 | GAGAACC  |
| ENSG00000198719 | GCAGCAU  |
| ENSG00000198719 | UAUAAAAG |
| ENSG00000198720 | AAGUGCA  |
| ENSG00000198720 | AAGUGCU  |
| ENSG00000198720 | AGCAGCA  |
| ENSG00000198720 | AGCAGCG  |
| ENSG00000198720 | AGCAGCU  |
| ENSG00000198720 | CAGCUGG  |
| ENSG00000198720 | CCCUGAG  |
| ENSG00000198720 | GCACCAU  |
| ENSG00000198720 | GCUAGCA  |
| ENSG00000198720 | GCUGGUG  |
| ENSG00000198720 | GGGGAGC  |
| ENSG00000198720 | GUGCUUG  |
| ENSG00000198720 | UGAAAUG  |
| ENSG00000198720 | UGUGCUU  |
| ENSG00000198720 | UGUGUCA  |
| ENSG00000198722 | AGCACCA  |
| ENSG00000198722 | CAGCAAA  |
| ENSG00000198722 | UAUUACC  |
| ENSG00000198728 | GGGGCAG  |
| ENSG00000198729 | AGCCCUU  |
| ENSG00000198729 | CAAAGCA  |
| ENSG00000198729 | CUUUGGU  |
| ENSG00000198729 | GACCUGG  |
| ENSG00000198729 | GCCUGAU  |
| ENSG00000198729 | UGCCAGC  |
| ENSG00000198732 | AAAAGUA  |
| ENSG00000198732 | AAGUGCA  |
| ENSG00000198732 | AAGUUGU  |
| ENSG00000198732 | AAUCUCU  |
| ENSG00000198732 | AGUGCAA  |
| ENSG00000198732 | CAGUAGA  |
| ENSG00000198732 | CAGUAGU  |
| ENSG00000198732 | CCUGUAC  |
| ENSG00000198732 | CUACAAA  |
| ENSG00000198732 | CUAUACA  |
| ENSG00000198732 | CUUCUCU  |
| ENSG00000198732 | GUCAGUU  |

|                 |         |
|-----------------|---------|
| ENSG00000198732 | GUGCAAA |
| ENSG00000198732 | UCCCUUG |
| ENSG00000198736 | CAGCAGG |
| ENSG00000198739 | AAAGAAU |
| ENSG00000198739 | AACAAAC |
| ENSG00000198739 | AAUACUG |
| ENSG00000198739 | ACAGGUG |
| ENSG00000198739 | ACAUUAC |
| ENSG00000198739 | ACUGCAG |
| ENSG00000198739 | ACUGUAG |
| ENSG00000198739 | AGGUAGU |
| ENSG00000198739 | AUCCCUU |
| ENSG00000198739 | AUUCAUU |
| ENSG00000198739 | CCCACCU |
| ENSG00000198739 | CUAGGCU |
| ENSG00000198739 | CUGUUGA |
| ENSG00000198739 | GGUUACC |
| ENSG00000198739 | UACAGUU |
| ENSG00000198739 | UCCUCU  |
| ENSG00000198739 | UCGUGCA |
| ENSG00000198739 | UCUGGAG |
| ENSG00000198740 | AAAGAGC |
| ENSG00000198740 | AAAGAGG |
| ENSG00000198740 | AAAGCUG |
| ENSG00000198740 | AAAUGGU |
| ENSG00000198740 | AAUCUCU |
| ENSG00000198740 | AGCCCUU |
| ENSG00000198740 | AUACCUC |
| ENSG00000198740 | AUGGCUU |
| ENSG00000198740 | CACAGUG |
| ENSG00000198740 | CAGCUGG |
| ENSG00000198740 | CUCACAC |
| ENSG00000198740 | GGAAUGU |
| ENSG00000198740 | GUUAGGA |
| ENSG00000198740 | UACAAAG |
| ENSG00000198740 | UAUAUGA |
| ENSG00000198740 | UCAUUUG |
| ENSG00000198740 | UGAGGAC |
| ENSG00000198740 | UUGAGGC |
| ENSG00000198740 | UUGUGAC |
| ENSG00000198742 | AAAAACC |
| ENSG00000198742 | AAAGUGC |
| ENSG00000198742 | AACAAAC |
| ENSG00000198742 | AAUACUG |
| ENSG00000198742 | AAUCACU |
| ENSG00000198742 | ACUGUUU |
| ENSG00000198742 | AGCAGCG |
| ENSG00000198742 | AGCCUGC |
| ENSG00000198742 | AGUGGUU |
| ENSG00000198742 | AUGAGCU |
| ENSG00000198742 | AUGUAAU |
| ENSG00000198742 | AUUGCAC |
| ENSG00000198742 | CAGCUGG |
| ENSG00000198742 | CCCUGAG |
| ENSG00000198742 | CUUUGGU |
| ENSG00000198742 | GCAGAAG |
| ENSG00000198742 | GCUUCCU |
| ENSG00000198742 | GGCUGCG |
| ENSG00000198742 | GGGAGCU |
| ENSG00000198742 | GGUUGAC |
| ENSG00000198742 | GUAACAG |
| ENSG00000198742 | GUGCAAA |
| ENSG00000198742 | UACAAAG |
| ENSG00000198742 | UAUUGCU |

|                 |         |
|-----------------|---------|
| ENSG00000198742 | UCACAAG |
| ENSG00000198742 | UGACAUC |
| ENSG00000198742 | UGCAUAG |
| ENSG00000198742 | UGGCUGC |
| ENSG00000198742 | UCCAUUA |
| ENSG00000198742 | UUGACAC |
| ENSG00000198742 | UUGGUUC |
| ENSG00000198743 | AAAGUGC |
| ENSG00000198743 | AAGGCAC |
| ENSG00000198743 | ACACACC |
| ENSG00000198743 | ACACACU |
| ENSG00000198743 | ACAGUAC |
| ENSG00000198743 | ACUCAAA |
| ENSG00000198743 | AGCAGCA |
| ENSG00000198743 | AGCAGCU |
| ENSG00000198743 | AGGACAC |
| ENSG00000198743 | CACAGGG |
| ENSG00000198743 | CAGCUGG |
| ENSG00000198743 | CAGUGCA |
| ENSG00000198743 | CCUUCAU |
| ENSG00000198743 | CUCACAC |
| ENSG00000198743 | GCAGCAU |
| ENSG00000198743 | GUGCUUG |
| ENSG00000198743 | UAAUACA |
| ENSG00000198743 | UAUGGUU |
| ENSG00000198743 | UCUCACC |
| ENSG00000198743 | UGACCUA |
| ENSG00000198743 | UGCUGAC |
| ENSG00000198743 | UGGUACC |
| ENSG00000198746 | GAGGUAG |
| ENSG00000198753 | CCAGCAU |
| ENSG00000198756 | AUAUUAU |
| ENSG00000198756 | CACACCU |
| ENSG00000198756 | CAGUAGA |
| ENSG00000198756 | UAUAAAG |
| ENSG00000198756 | UCACAGG |
| ENSG00000198758 | CUUGGAG |
| ENSG00000198768 | AGCCCUU |
| ENSG00000198771 | CAGGCUC |
| ENSG00000198771 | CCAGCAU |
| ENSG00000198771 | GAGAACU |
| ENSG00000198783 | GGGUCUU |
| ENSG00000198785 | AAAGAAU |
| ENSG00000198785 | AAAGAGC |
| ENSG00000198785 | AAGGCAC |
| ENSG00000198785 | ACCCUGU |
| ENSG00000198785 | ACUGUUU |
| ENSG00000198785 | AGCAAAA |
| ENSG00000198785 | CCUGUAC |
| ENSG00000198785 | CUGCUCU |
| ENSG00000198785 | GAGGUAG |
| ENSG00000198785 | GAGGUAU |
| ENSG00000198785 | UCAUAGA |
| ENSG00000198785 | UGAGGAC |
| ENSG00000198785 | UGCAUUG |
| ENSG00000198785 | UGCUCAC |
| ENSG00000198785 | UUCAAGC |
| ENSG00000198791 | AAAAACC |
| ENSG00000198791 | AAAGCUG |
| ENSG00000198791 | AAGUGCA |
| ENSG00000198791 | AGAUAAA |
| ENSG00000198791 | AGUGCAA |
| ENSG00000198791 | GAAAACA |
| ENSG00000198791 | GUGCAAA |

|                 |          |
|-----------------|----------|
| ENSG00000198791 | UACAAAG  |
| ENSG00000198792 | AAAGAGC  |
| ENSG00000198792 | AAGGCAC  |
| ENSG00000198792 | ACAUCAC  |
| ENSG00000198792 | AUCAUAC  |
| ENSG00000198792 | AUUGCAC  |
| ENSG00000198792 | CAAAACU  |
| ENSG00000198792 | CUGGCUC  |
| ENSG00000198792 | GCAGCAU  |
| ENSG00000198792 | GCCUGGA  |
| ENSG00000198792 | GGAGGAG  |
| ENSG00000198792 | GGCUCUG  |
| ENSG00000198792 | GGUGGUC  |
| ENSG00000198792 | UACAAAG  |
| ENSG00000198792 | UGCCAGC  |
| ENSG00000198792 | UUCAAGC  |
| ENSG00000198792 | UUUCAAC  |
| ENSG00000198794 | AAAGUGC  |
| ENSG00000198794 | AAGUGCA  |
| ENSG00000198794 | ACUCAGC  |
| ENSG00000198794 | AGCACCA  |
| ENSG00000198794 | GAGACCU  |
| ENSG00000198794 | GAGCCCC  |
| ENSG00000198794 | GCAGCAU  |
| ENSG00000198794 | GCAUCCC  |
| ENSG00000198794 | GGAGGAG  |
| ENSG00000198794 | GGGGGAA  |
| ENSG00000198794 | GUGCUUG  |
| ENSG00000198794 | UGCAUAG  |
| ENSG00000198794 | UGGAGAU  |
| ENSG00000198794 | UGUGCUU  |
| ENSG00000198795 | ACUCAA   |
| ENSG00000198795 | AGUAACA  |
| ENSG00000198795 | GAAAACA  |
| ENSG00000198795 | UAGGGCC  |
| ENSG00000198795 | UAUCAGA  |
| ENSG00000198795 | UGCAAAG  |
| ENSG00000198797 | AAAGAAU  |
| ENSG00000198797 | AAUCACU  |
| ENSG00000198797 | GAAAACA  |
| ENSG00000198797 | UUGGCAC  |
| ENSG00000198799 | AGCAGCA  |
| ENSG00000198799 | AGGUAGU  |
| ENSG00000198799 | GAGGUAU  |
| ENSG00000198799 | UAUAAAAG |
| ENSG00000198807 | AGUGGUU  |
| ENSG00000198807 | CCUUCAU  |
| ENSG00000198812 | CAGCUGG  |
| ENSG00000198814 | AACCGUU  |
| ENSG00000198814 | ACUUGGA  |
| ENSG00000198814 | GAGUUGG  |
| ENSG00000198814 | GCAGCAU  |
| ENSG00000198815 | AAGUGCU  |
| ENSG00000198815 | ACUGCAU  |
| ENSG00000198815 | ACUGUAG  |
| ENSG00000198815 | ACUUGGA  |
| ENSG00000198815 | AGUACUG  |
| ENSG00000198815 | CAA AUGC |
| ENSG00000198815 | CAGCAA   |
| ENSG00000198815 | CAGCUGG  |
| ENSG00000198815 | CUCCAC   |
| ENSG00000198815 | CUGCAGG  |
| ENSG00000198815 | GAUUGUA  |
| ENSG00000198815 | GCAGAAG  |

|                 |          |
|-----------------|----------|
| ENSG00000198815 | GCAGCAU  |
| ENSG00000198815 | GGCAGCG  |
| ENSG00000198815 | GUUAGGA  |
| ENSG00000198815 | UACAAAG  |
| ENSG00000198815 | UCAAGUA  |
| ENSG00000198815 | UCAUAGA  |
| ENSG00000198815 | UCCCUCU  |
| ENSG00000198815 | UCGUGCA  |
| ENSG00000198815 | UGAAAUG  |
| ENSG00000198815 | UGACUGU  |
| ENSG00000198815 | UGCAGCU  |
| ENSG00000198815 | UGCAUUAU |
| ENSG00000198815 | UGUCUUU  |
| ENSG00000198821 | CAGCAGG  |
| ENSG00000198822 | AUCACUA  |
| ENSG00000198822 | CUACAAA  |
| ENSG00000198822 | UUCUAAU  |
| ENSG00000198824 | UCUGGAA  |
| ENSG00000198825 | AACAAAC  |
| ENSG00000198825 | UGUAUAA  |
| ENSG00000198826 | AACAUUC  |
| ENSG00000198826 | GAGCUAA  |
| ENSG00000198826 | UCCUGAG  |
| ENSG00000198826 | UUGGCAA  |
| ENSG00000198830 | AAAACUG  |
| ENSG00000198830 | AAAGUUU  |
| ENSG00000198830 | ACACACU  |
| ENSG00000198830 | ACAGUAU  |
| ENSG00000198830 | AGGCAGG  |
| ENSG00000198830 | AUACAAG  |
| ENSG00000198830 | CACCAGC  |
| ENSG00000198830 | CCUUCUU  |
| ENSG00000198830 | GACCCUG  |
| ENSG00000198830 | GCAGGAC  |
| ENSG00000198830 | GCCUGAU  |
| ENSG00000198830 | GUCCAGA  |
| ENSG00000198830 | UAUAAAAG |
| ENSG00000198830 | UCACAAG  |
| ENSG00000198836 | AAUUUUA  |
| ENSG00000198836 | CACAGGG  |
| ENSG00000198836 | CACUGUU  |
| ENSG00000198836 | GGGUUUA  |
| ENSG00000198836 | UCACAGG  |
| ENSG00000198836 | UCAUUCG  |
| ENSG00000198837 | AAUCCUU  |
| ENSG00000198837 | AGCAGCU  |
| ENSG00000198837 | CAAAACU  |
| ENSG00000198837 | CUACAAA  |
| ENSG00000198837 | GGCUCAG  |
| ENSG00000198837 | UAUUGCU  |
| ENSG00000198838 | UAUUGCU  |
| ENSG00000198838 | UGCAUUAU |
| ENSG00000198844 | AGGUAGU  |
| ENSG00000198844 | CUCCAUU  |
| ENSG00000198844 | CUUCACC  |
| ENSG00000198844 | GAGGCUG  |
| ENSG00000198844 | GAGGUAG  |
| ENSG00000198844 | GGCAAGA  |
| ENSG00000198844 | GUCUGCC  |
| ENSG00000198844 | UGUCUGC  |
| ENSG00000198846 | AACAAAC  |
| ENSG00000198846 | AACAUUC  |
| ENSG00000198846 | AAGGCAC  |
| ENSG00000198846 | AAGUCUU  |



|                 |         |
|-----------------|---------|
| ENSG00000198846 | AAGUGCA |
| ENSG00000198846 | ACAGUAU |
| ENSG00000198846 | ACAUAGA |
| ENSG00000198846 | ACAUUCA |
| ENSG00000198846 | ACCAUUA |
| ENSG00000198846 | AGCCAGU |
| ENSG00000198846 | CAGUUAC |
| ENSG00000198846 | CUACAAA |
| ENSG00000198846 | CUUGUUA |
| ENSG00000198846 | GCAACUU |
| ENSG00000198846 | GGCAGUG |
| ENSG00000198846 | UCACAGG |
| ENSG00000198846 | UCACAGU |
| ENSG00000198846 | UCCAUA  |
| ENSG00000198846 | UUGGCAA |
| ENSG00000198846 | UUGGCAC |
| ENSG00000198853 | CCAGCAU |
| ENSG00000198853 | CCCUGAG |
| ENSG00000198853 | GCCUGGG |
| ENSG00000198855 | UCUAGAG |
| ENSG00000198858 | AAAAACC |
| ENSG00000198858 | AGCACCA |
| ENSG00000198863 | AAGUGCA |
| ENSG00000198863 | CAAAGUG |
| ENSG00000198863 | UAAUAGU |
| ENSG00000198873 | GGCUCUG |
| ENSG00000198879 | AGCUGCC |
| ENSG00000198879 | GUGCUUG |
| ENSG00000198879 | UGUGCUU |
| ENSG00000198881 | GAGGAUA |
| ENSG00000198887 | UAUAUGA |
| ENSG00000198887 | UGACCUA |
| ENSG00000198890 | AAGUGCU |
| ENSG00000198890 | AGUGCUU |
| ENSG00000198890 | GAAACAU |
| ENSG00000198890 | UGGCUGC |
| ENSG00000198892 | CUCCAA  |
| ENSG00000198894 | CACAGUG |
| ENSG00000198894 | CAGCAGA |
| ENSG00000198894 | UACAAAG |
| ENSG00000198894 | UCACAGG |
| ENSG00000198894 | UCCUAG  |
| ENSG00000198898 | AAAGUUA |
| ENSG00000198898 | AUGCAUU |
| ENSG00000198898 | GCAGCAU |
| ENSG00000198898 | GGUAGAC |
| ENSG00000198898 | UAAUACA |
| ENSG00000198898 | UCACAUU |
| ENSG00000198898 | UGUGCUU |
| ENSG00000198900 | ACUGGCU |
| ENSG00000198900 | CUACAGU |
| ENSG00000198900 | CUGGCUC |
| ENSG00000198900 | GACAACU |
| ENSG00000198900 | UACAGUU |
| ENSG00000198901 | AGUGCUG |
| ENSG00000198901 | GUGCAA  |
| ENSG00000198901 | UGCAAAG |
| ENSG00000198901 | UUGGCAA |
| ENSG00000198901 | UUGGCAC |
| ENSG00000198908 | CUGGCUC |
| ENSG00000198909 | AAAAGUA |
| ENSG00000198909 | AAAGUGC |
| ENSG00000198909 | AACAGUC |
| ENSG00000198909 | AAGGCAC |

|                 |         |
|-----------------|---------|
| ENSG00000198909 | AAGUGCA |
| ENSG00000198909 | ACAUUAC |
| ENSG00000198909 | ACAUUCA |
| ENSG00000198909 | ACUGGCC |
| ENSG00000198909 | AUAUAAC |
| ENSG00000198909 | AUCCCUU |
| ENSG00000198909 | AUGGCUU |
| ENSG00000198909 | CUUCUCU |
| ENSG00000198909 | GAGGUAG |
| ENSG00000198909 | GAGGUAU |
| ENSG00000198909 | GCAGGUU |
| ENSG00000198909 | GGAGGAG |
| ENSG00000198909 | GGCUGCG |
| ENSG00000198909 | GUAACAG |
| ENSG00000198909 | GUCAACA |
| ENSG00000198909 | UCACAUU |
| ENSG00000198909 | UCCAGUU |
| ENSG00000198909 | UCCCACA |
| ENSG00000198909 | UCCCUUU |
| ENSG00000198909 | UCCUGAG |
| ENSG00000198909 | UGCAUUG |
| ENSG00000198909 | UUGGAGG |
| ENSG00000198909 | UUGGCAA |
| ENSG00000198909 | UUGGUCC |
| ENSG00000198909 | UUUGCAC |
| ENSG00000198910 | ACUUGGA |
| ENSG00000198910 | CAGCUGG |
| ENSG00000198910 | GGGUUUA |
| ENSG00000198910 | GGUGGGC |
| ENSG00000198910 | UGCAGCU |
| ENSG00000198910 | UUGGCAC |
| ENSG00000198911 | CUCCCAC |
| ENSG00000198911 | CUGCCCC |
| ENSG00000198911 | UCCCACC |
| ENSG00000198912 | GUAAACA |
| ENSG00000198915 | AAAGUGC |
| ENSG00000198915 | AAAUCCC |
| ENSG00000198915 | AAGGCAC |
| ENSG00000198915 | AAGUGCU |
| ENSG00000198915 | ACUAGAU |
| ENSG00000198915 | ACUCAAA |
| ENSG00000198915 | CCCUGAG |
| ENSG00000198915 | CUCCCAA |
| ENSG00000198915 | CUCCCAC |
| ENSG00000198915 | GGCCUG  |
| ENSG00000198915 | GUAAACA |
| ENSG00000198915 | GUGCAAA |
| ENSG00000198915 | UAUGGUU |
| ENSG00000198915 | UGAAGUG |
| ENSG00000198915 | UGCCUG  |
| ENSG00000198919 | AAUUAUU |
| ENSG00000198920 | CCAGUGU |
| ENSG00000198920 | GGCAGUG |
| ENSG00000198925 | AGCACCA |
| ENSG00000198925 | AGCAGCA |
| ENSG00000198925 | CCAGCAU |
| ENSG00000198925 | CUGCAGC |
| ENSG00000198925 | GGCAGCG |
| ENSG00000198925 | GGCAGUG |
| ENSG00000198925 | GGGAGCU |
| ENSG00000198925 | GUGAGGU |
| ENSG00000198925 | UCCCUUG |
| ENSG00000198925 | UUGGCAC |
| ENSG00000198929 | AUGGCUU |

|                 |          |
|-----------------|----------|
| ENSG00000198929 | CAAAGCA  |
| ENSG00000198929 | GAAGGAA  |
| ENSG00000198929 | UCCCUUG  |
| ENSG00000198929 | UCCCUUU  |
| ENSG00000198929 | UGAGAAG  |
| ENSG00000198933 | AGCAUUC  |
| ENSG00000198933 | CCUUCUG  |
| ENSG00000198933 | GAGGUAU  |
| ENSG00000198933 | GUGCCUG  |
| ENSG00000198933 | UCACAGG  |
| ENSG00000198933 | UCACAGU  |
| ENSG00000198933 | UGGACUG  |
| ENSG00000198937 | UAUUGCU  |
| ENSG00000198939 | UCACAUU  |
| ENSG00000198939 | UCCAGUU  |
| ENSG00000198944 | AACAUUC  |
| ENSG00000198944 | CACAGUG  |
| ENSG00000198944 | GAGGUAG  |
| ENSG00000198944 | UCACAGG  |
| ENSG00000198945 | AAGUGCA  |
| ENSG00000198945 | GUGCAA   |
| ENSG00000198946 | CAGUAGU  |
| ENSG00000198947 | AAAGCUG  |
| ENSG00000198947 | AAAUUUC  |
| ENSG00000198947 | AACAAAC  |
| ENSG00000198947 | AAGGCAC  |
| ENSG00000198947 | AAUACUG  |
| ENSG00000198947 | ACAGUAC  |
| ENSG00000198947 | ACUCCAG  |
| ENSG00000198947 | CAAAGUG  |
| ENSG00000198947 | CACUCCU  |
| ENSG00000198947 | CAGGAAC  |
| ENSG00000198947 | CUUGUAU  |
| ENSG00000198947 | GAGGUAU  |
| ENSG00000198947 | GGCAAGA  |
| ENSG00000198947 | GGGUUUA  |
| ENSG00000198947 | GUAAACA  |
| ENSG00000198947 | GUGAGGU  |
| ENSG00000198947 | UCAAGUA  |
| ENSG00000198947 | UGCAAAG  |
| ENSG00000198947 | UGCAUUA  |
| ENSG00000198947 | UUCAAAU  |
| ENSG00000198947 | UCCCAUA  |
| ENSG00000198947 | UUUGCAA  |
| ENSG00000198948 | AAAGAAU  |
| ENSG00000198948 | AACAUUC  |
| ENSG00000198948 | ACAUUCA  |
| ENSG00000198948 | AGAUGUG  |
| ENSG00000198948 | AUAAUAC  |
| ENSG00000198948 | AUAU AAC |
| ENSG00000198948 | AUGCAUU  |
| ENSG00000198948 | AUGUGCC  |
| ENSG00000198948 | CUUUGGU  |
| ENSG00000198948 | GAGAAAU  |
| ENSG00000198948 | GAGGUAG  |
| ENSG00000198948 | GAGGUAU  |
| ENSG00000198948 | GAUAUGU  |
| ENSG00000198948 | GUAAACA  |
| ENSG00000198948 | GUGCAA   |
| ENSG00000198948 | UCAAGUA  |
| ENSG00000198948 | UGACAUC  |
| ENSG00000198948 | UGCAUAG  |
| ENSG00000198948 | UCCCUAG  |
| ENSG00000198951 | CACUCCU  |

|                 |          |
|-----------------|----------|
| ENSG00000198951 | GAGGUAG  |
| ENSG00000198952 | ACAGGUG  |
| ENSG00000198952 | AGCUGCC  |
| ENSG00000198952 | AGGGAGG  |
| ENSG00000198952 | AUUCAUU  |
| ENSG00000198952 | GAGCUGC  |
| ENSG00000198952 | GGAGUCC  |
| ENSG00000198952 | GGUGGGC  |
| ENSG00000198952 | UCAUGAU  |
| ENSG00000198952 | UCCAGAG  |
| ENSG00000198952 | UCUGGAG  |
| ENSG00000198952 | UGAGUCU  |
| ENSG00000198952 | UGGCUGC  |
| ENSG00000198959 | CAAAGCA  |
| ENSG00000198959 | UGGAGAU  |
| ENSG00000198960 | ACCACAG  |
| ENSG00000198961 | AAAAGUA  |
| ENSG00000198961 | AAAGUAC  |
| ENSG00000198961 | AAAUCCC  |
| ENSG00000198961 | AACAUUC  |
| ENSG00000198961 | ACAAUUAU |
| ENSG00000198961 | ACAGUAU  |
| ENSG00000198961 | ACAUUAC  |
| ENSG00000198961 | ACAUUCA  |
| ENSG00000198961 | AGCAGCU  |
| ENSG00000198961 | CUUUGGU  |
| ENSG00000198961 | GAAAACA  |
| ENSG00000198961 | GACCUGG  |
| ENSG00000198961 | UGCAUUG  |
| ENSG00000198961 | UGGGACA  |
| ENSG00000198963 | AAACUGU  |
| ENSG00000198963 | AAGUGCU  |
| ENSG00000198963 | ACAAUUAU |
| ENSG00000198963 | ACAUAGA  |
| ENSG00000198963 | ACAUUCA  |
| ENSG00000198963 | ACUGUAG  |
| ENSG00000198963 | AUGCAUU  |
| ENSG00000198963 | CAGUAGU  |
| ENSG00000198963 | CCAGUGU  |
| ENSG00000198963 | GAGCCCC  |
| ENSG00000198963 | UCCUAUA  |
| ENSG00000198963 | UGCAUAU  |
| ENSG00000198963 | UGUCUUU  |
| ENSG00000198964 | AAAGUAU  |
| ENSG00000198964 | AAGGCAC  |
| ENSG00000198964 | AAUCACU  |
| ENSG00000198964 | AGUGCUG  |
| ENSG00000198964 | AUAAAGU  |
| ENSG00000198964 | AUGGCUU  |
| ENSG00000198964 | CUUACAG  |
| ENSG00000198964 | CUUCACC  |
| ENSG00000198964 | UCACAGU  |
| ENSG00000198964 | UGGAGAU  |
| ENSG00000198964 | UUGGAGG  |
| ENSG00000198964 | UUGGCAA  |
| ENSG00000203710 | UCUAGAG  |
| ENSG00000203710 | UGUUGAA  |
| ENSG00000203727 | AAGUUGU  |
| ENSG00000203727 | ACCUGGA  |
| ENSG00000203727 | AUAUUAU  |
| ENSG00000203727 | AUCCUUU  |
| ENSG00000203727 | CACAAUG  |
| ENSG00000203727 | CAGUCCA  |
| ENSG00000203727 | CUAUACA  |

|                 |         |
|-----------------|---------|
| ENSG00000203727 | CUGGAAA |
| ENSG00000203727 | GCCCUUA |
| ENSG00000203727 | GGAAGCC |
| ENSG00000203727 | UCCAGAG |
| ENSG00000203727 | UCCAGUU |
| ENSG00000203727 | UCCCUUG |
| ENSG00000203727 | UGCAAAG |
| ENSG00000203727 | UUCAAAU |
| ENSG00000203727 | UUUGCAA |
| ENSG00000203759 | AAAAACC |
| ENSG00000203759 | AAAGCUG |
| ENSG00000203759 | AAAUUUC |
| ENSG00000203759 | AACAGUC |
| ENSG00000203759 | AACGCCU |
| ENSG00000203759 | AAGUGCU |
| ENSG00000203759 | AAUCUCA |
| ENSG00000203759 | AAUGCCC |
| ENSG00000203759 | ACAUCAC |
| ENSG00000203759 | ACAUUAC |
| ENSG00000203759 | ACAUUCA |
| ENSG00000203759 | AGCUGCC |
| ENSG00000203759 | AGUGCUU |
| ENSG00000203759 | AUAAAGU |
| ENSG00000203759 | AUAAUAC |
| ENSG00000203759 | AUAUUAU |
| ENSG00000203759 | AUCAUAC |
| ENSG00000203759 | AUCCCUU |
| ENSG00000203759 | AUCCUUG |
| ENSG00000203759 | CAGACAG |
| ENSG00000203759 | CCAGGAG |
| ENSG00000203759 | CCCACCG |
| ENSG00000203759 | CCCACCU |
| ENSG00000203759 | CCCCCAG |
| ENSG00000203759 | CUACAGU |
| ENSG00000203759 | CUAGUAG |
| ENSG00000203759 | CUGCCCC |
| ENSG00000203759 | CUUUGGU |
| ENSG00000203759 | GAAAACA |
| ENSG00000203759 | GACUUCC |
| ENSG00000203759 | GAGAAGA |
| ENSG00000203759 | GAGCCCC |
| ENSG00000203759 | GAGGUAG |
| ENSG00000203759 | GCUACAU |
| ENSG00000203759 | GCUGGUG |
| ENSG00000203759 | GCUUCCU |
| ENSG00000203759 | GGAGAGA |
| ENSG00000203759 | GGCUCAG |
| ENSG00000203759 | GGCUCUG |
| ENSG00000203759 | GGUGGGC |
| ENSG00000203759 | GUAACAG |
| ENSG00000203759 | GUAUUCU |
| ENSG00000203759 | GUCUACU |
| ENSG00000203759 | GUGCAA  |
| ENSG00000203759 | UAUAAAG |
| ENSG00000203759 | UAUAAUA |
| ENSG00000203759 | UAUCAGA |
| ENSG00000203759 | UCCCACA |
| ENSG00000203759 | UCCCACC |
| ENSG00000203759 | UCCCUUU |
| ENSG00000203759 | UCUGGAG |
| ENSG00000203759 | UGGGGGA |
| ENSG00000203759 | UUCUUGU |
| ENSG00000203759 | UUGGAGG |
| ENSG00000203759 | UUGGUUC |

|                 |         |
|-----------------|---------|
| ENSG00000203772 | GGCAGUG |
| ENSG00000203778 | AAGGUGC |
| ENSG00000203778 | GUGCCAC |
| ENSG00000203782 | AGGUAGU |
| ENSG00000203782 | GAGGUAG |
| ENSG00000203784 | CAGCAGA |
| ENSG00000203784 | GUUCAUG |
| ENSG00000203791 | CACUGUU |
| ENSG00000203791 | UCCAGAG |
| ENSG00000203791 | UGGGUGA |
| ENSG00000203811 | AAAGAGC |
| ENSG00000203812 | AAAGAGC |
| ENSG00000203813 | AAAGAGC |
| ENSG00000203814 | AAAGAGC |
| ENSG00000203852 | AAAGAGC |
| ENSG00000203879 | ACAUUCA |
| ENSG00000203879 | CCUUCUG |
| ENSG00000203879 | CUCCCAA |
| ENSG00000203879 | CUCCCAC |
| ENSG00000203879 | GGGCCCC |
| ENSG00000203879 | UCUCCAA |
| ENSG00000203879 | UGUGCUU |
| ENSG00000203879 | UUGGUCC |
| ENSG00000203879 | UUUGCAA |
| ENSG00000203880 | AAGGUGC |
| ENSG00000203883 | AAAGUAA |
| ENSG00000203950 | CUCUGGG |
| ENSG00000204003 | CAGGUGA |
| ENSG00000204003 | CUGCAGC |
| ENSG00000204033 | CCUUCUG |
| ENSG00000204052 | UCCAGAG |
| ENSG00000204065 | CAUGGGU |
| ENSG00000204065 | UGGGUGA |
| ENSG00000204070 | AAUACUG |
| ENSG00000204070 | AGUGGUU |
| ENSG00000204070 | CCUUCUU |
| ENSG00000204070 | CUUCUCU |
| ENSG00000204070 | GCUGGUG |
| ENSG00000204070 | GGCUCAG |
| ENSG00000204070 | UGUGCUU |
| ENSG00000204084 | AAAGUUU |
| ENSG00000204084 | AAAUCCC |
| ENSG00000204084 | AAGGCAC |
| ENSG00000204084 | ACAGGUG |
| ENSG00000204084 | AUAUUAU |
| ENSG00000204084 | CUUCACC |
| ENSG00000204084 | GAAACAU |
| ENSG00000204084 | GAGCUGC |
| ENSG00000204084 | GAGUGUG |
| ENSG00000204084 | GCCUGU  |
| ENSG00000204084 | GGCUCAG |
| ENSG00000204084 | UGCCUG  |
| ENSG00000204086 | UUCAAAU |
| ENSG00000204103 | AAAGUUU |
| ENSG00000204103 | AAAUCCC |
| ENSG00000204103 | AAAUGGU |
| ENSG00000204103 | AAUGCCC |
| ENSG00000204103 | AAUUAUU |
| ENSG00000204103 | ACUGUUU |
| ENSG00000204103 | AGCAAAA |
| ENSG00000204103 | AGUGCAA |
| ENSG00000204103 | AUAUAAC |
| ENSG00000204103 | AUCAUAC |
| ENSG00000204103 | AUCCUUU |

|                 |         |
|-----------------|---------|
| ENSG00000204103 | CAGUCUG |
| ENSG00000204103 | CCAGCAU |
| ENSG00000204103 | GACCUGG |
| ENSG00000204103 | GCACCAU |
| ENSG00000204103 | GCAUCC  |
| ENSG00000204103 | GUCAGUU |
| ENSG00000204103 | GUCCAGA |
| ENSG00000204103 | GUUAAUG |
| ENSG00000204103 | UAAUACA |
| ENSG00000204103 | UAAUGCU |
| ENSG00000204103 | UCAACAG |
| ENSG00000204103 | UGAAAUG |
| ENSG00000204103 | UUCAAAU |
| ENSG00000204103 | UUUCAAC |
| ENSG00000204116 | AACUACU |
| ENSG00000204116 | AAGACAU |
| ENSG00000204116 | AAGUGCA |
| ENSG00000204116 | AAGUGUG |
| ENSG00000204116 | AAUUGCU |
| ENSG00000204116 | ACAAGGU |
| ENSG00000204116 | ACAUAGA |
| ENSG00000204116 | AGGCAGG |
| ENSG00000204116 | AUGAUGC |
| ENSG00000204116 | CAGCAA  |
| ENSG00000204116 | CCAGUGC |
| ENSG00000204116 | GAGGCAG |
| ENSG00000204116 | GAGGUAG |
| ENSG00000204116 | GCAUCC  |
| ENSG00000204116 | GCUUCCU |
| ENSG00000204116 | GGCUCAG |
| ENSG00000204116 | GUGACUG |
| ENSG00000204116 | UCAAGUA |
| ENSG00000204116 | UGUCUUU |
| ENSG00000204116 | UUAUGCA |
| ENSG00000204120 | AAGGUGC |
| ENSG00000204120 | AAGUCAC |
| ENSG00000204120 | ACUCAGC |
| ENSG00000204120 | ACUCCAG |
| ENSG00000204120 | AGCAAAA |
| ENSG00000204120 | AUCCCUU |
| ENSG00000204120 | AUUGCAC |
| ENSG00000204120 | CAAAGCA |
| ENSG00000204120 | CAGCAGA |
| ENSG00000204120 | CAGCAGG |
| ENSG00000204120 | CAGUAGA |
| ENSG00000204120 | CUAGUCC |
| ENSG00000204120 | CUCCAGC |
| ENSG00000204120 | CUCUCC  |
| ENSG00000204120 | GAAGGUC |
| ENSG00000204120 | GCACCAU |
| ENSG00000204120 | GCAGAAG |
| ENSG00000204120 | GGGGAGC |
| ENSG00000204120 | GUAAACA |
| ENSG00000204120 | GUAUGUU |
| ENSG00000204120 | GUCUCUG |
| ENSG00000204120 | UACAAAG |
| ENSG00000204120 | UCCUCU  |
| ENSG00000204120 | UCCUCG  |
| ENSG00000204120 | UUGUGUC |
| ENSG00000204130 | AAGGCAC |
| ENSG00000204130 | GAAGGAA |
| ENSG00000204130 | UCUGGAG |
| ENSG00000204138 | AAUUAUU |
| ENSG00000204138 | ACAAGGU |

|                 |          |
|-----------------|----------|
| ENSG00000204138 | ACAUCAC  |
| ENSG00000204138 | ACAUUAC  |
| ENSG00000204138 | CCAGUGC  |
| ENSG00000204138 | CCAGUGU  |
| ENSG00000204138 | CUGGCUC  |
| ENSG00000204138 | GUGAGGU  |
| ENSG00000204138 | UAUGGUU  |
| ENSG00000204138 | UAUUGCU  |
| ENSG00000204138 | UCCAGUU  |
| ENSG00000204138 | UGAAAUG  |
| ENSG00000204138 | UUCUGCA  |
| ENSG00000204138 | UUGGCAC  |
| ENSG00000204160 | AAUACUG  |
| ENSG00000204160 | CUGGGCA  |
| ENSG00000204160 | CUUUGGU  |
| ENSG00000204160 | GGAAGCC  |
| ENSG00000204160 | GGCAAGA  |
| ENSG00000204160 | UAUUACC  |
| ENSG00000204160 | UCAAGUA  |
| ENSG00000204160 | UUCAAGC  |
| ENSG00000204175 | AGCCCUU  |
| ENSG00000204175 | GCCCUUA  |
| ENSG00000204176 | CUUCUCU  |
| ENSG00000204186 | AUAU AAC |
| ENSG00000204186 | CAA AUGC |
| ENSG00000204217 | AAAGAGG  |
| ENSG00000204217 | AACCUGU  |
| ENSG00000204217 | ACAUUCA  |
| ENSG00000204217 | ACCCGUA  |
| ENSG00000204217 | ACUGCAG  |
| ENSG00000204217 | AGCCCUU  |
| ENSG00000204217 | AUGGCUU  |
| ENSG00000204217 | CAUGGAU  |
| ENSG00000204217 | CCCUGAG  |
| ENSG00000204217 | CUCCA UU |
| ENSG00000204217 | GAAAACA  |
| ENSG00000204217 | GAGACCU  |
| ENSG00000204217 | GAGCCCU  |
| ENSG00000204217 | GCACCAU  |
| ENSG00000204217 | GGAAGCC  |
| ENSG00000204217 | GGCCUG   |
| ENSG00000204217 | GGCUCAG  |
| ENSG00000204217 | GUCAUUG  |
| ENSG00000204217 | UAAUACA  |
| ENSG00000204217 | UGCAUAG  |
| ENSG00000204217 | UGCUGAC  |
| ENSG00000204217 | UUGACAC  |
| ENSG00000204217 | UUGUUCG  |
| ENSG00000204228 | AGGGUCU  |
| ENSG00000204231 | AACCUGG  |
| ENSG00000204231 | ACAGUAU  |
| ENSG00000204231 | ACUGCAG  |
| ENSG00000204231 | AGUGCUU  |
| ENSG00000204231 | CCAGUGC  |
| ENSG00000204231 | CUGACUC  |
| ENSG00000204231 | CUGCCCC  |
| ENSG00000204231 | GAGUCUU  |
| ENSG00000204231 | UCCAGAG  |
| ENSG00000204231 | UGAAAGG  |
| ENSG00000204248 | CACAGUG  |
| ENSG00000204248 | UCACAGU  |
| ENSG00000204252 | AGACGGG  |
| ENSG00000204252 | CAUAUUG  |
| ENSG00000204252 | CCGGAGC  |



|                 |         |
|-----------------|---------|
| ENSG00000204252 | GGAAGCC |
| ENSG00000204252 | GGACGGA |
| ENSG00000204252 | GGCAGCG |
| ENSG00000204252 | UGAGAAU |
| ENSG00000204256 | AAAGAGC |
| ENSG00000204256 | AACAAAC |
| ENSG00000204262 | ACAGUAU |
| ENSG00000204262 | AGCAAAA |
| ENSG00000204262 | CAAGAGC |
| ENSG00000204262 | CCAUUAC |
| ENSG00000204262 | CUCAGGG |
| ENSG00000204262 | GAAGGAA |
| ENSG00000204262 | GAGAUGA |
| ENSG00000204262 | GAGGUAG |
| ENSG00000204262 | GAGGUAU |
| ENSG00000204262 | GCACCAU |
| ENSG00000204262 | UUCUUGU |
| ENSG00000204267 | CAAAGCA |
| ENSG00000204267 | CCUGCUG |
| ENSG00000204267 | UUCCUAG |
| ENSG00000204271 | AUGCCUU |
| ENSG00000204271 | CUGGACU |
| ENSG00000204271 | GAUUGUA |
| ENSG00000204271 | GUCUACU |
| ENSG00000204271 | UAAUGCU |
| ENSG00000204271 | UAGGGCC |
| ENSG00000204271 | UUGGCAC |
| ENSG00000204291 | GAGGUAG |
| ENSG00000204291 | GUAUGUU |
| ENSG00000204291 | GUCAACA |
| ENSG00000204291 | UUGGUUC |
| ENSG00000204301 | UUCAAAU |
| ENSG00000204304 | AAAAAUC |
| ENSG00000204304 | AAAGUAC |
| ENSG00000204304 | AAAGUAU |
| ENSG00000204304 | AAGUAGC |
| ENSG00000204304 | AUGAGCU |
| ENSG00000204304 | CAGACAG |
| ENSG00000204304 | CUCCAC  |
| ENSG00000204304 | CUGCCCC |
| ENSG00000204304 | GAGAACU |
| ENSG00000204304 | GAGCUGC |
| ENSG00000204304 | GAGGGGC |
| ENSG00000204304 | GAGGUAG |
| ENSG00000204304 | GAGGUAU |
| ENSG00000204304 | GGCAGGG |
| ENSG00000204304 | GGGGUGC |
| ENSG00000204304 | GGGGUGG |
| ENSG00000204304 | GGUUUAC |
| ENSG00000204304 | GUCCAGA |
| ENSG00000204304 | GUGCUUG |
| ENSG00000204304 | GUGGGGA |
| ENSG00000204304 | UCCACC  |
| ENSG00000204304 | UCCUGAG |
| ENSG00000204304 | UGGGACA |
| ENSG00000204304 | UGUGCUU |
| ENSG00000204304 | UUGGCAC |
| ENSG00000204308 | AAUACUG |
| ENSG00000204308 | AGGUAGU |
| ENSG00000204308 | CACUCCU |
| ENSG00000204308 | CCCACCU |
| ENSG00000204308 | GAGGUAG |
| ENSG00000204308 | GGUGGGC |
| ENSG00000204310 | AAAACUG |

|                 |         |
|-----------------|---------|
| ENSG00000204310 | ACAUUCA |
| ENSG00000204310 | ACUGGCU |
| ENSG00000204310 | AGGCAGG |
| ENSG00000204310 | CUCCAGC |
| ENSG00000204310 | CUGCAGG |
| ENSG00000204310 | CUGGCUC |
| ENSG00000204310 | GAGACCU |
| ENSG00000204310 | GAGAUGA |
| ENSG00000204310 | GAGGCAG |
| ENSG00000204310 | GCAGCAU |
| ENSG00000204310 | GGAAUGU |
| ENSG00000204310 | GGCAGGG |
| ENSG00000204310 | GGCCUG  |
| ENSG00000204310 | GGCUCAG |
| ENSG00000204310 | UCCACA  |
| ENSG00000204335 | AACCUGG |
| ENSG00000204352 | UGAAGCU |
| ENSG00000204371 | CUCUGGG |
| ENSG00000204371 | GGAAUGU |
| ENSG00000204381 | CCUGCUG |
| ENSG00000204388 | AACAUUC |
| ENSG00000204392 | AAUUUUA |
| ENSG00000204394 | UAUUGCU |
| ENSG00000204406 | AAAGAAU |
| ENSG00000204406 | AAAGUGC |
| ENSG00000204406 | AAGUGUG |
| ENSG00000204406 | AGAUAAA |
| ENSG00000204406 | AUAAAGU |
| ENSG00000204406 | GAAACAU |
| ENSG00000204435 | CCCACCG |
| ENSG00000204435 | CCCACCU |
| ENSG00000204435 | UCCACA  |
| ENSG00000204435 | UCCUGAG |
| ENSG00000204435 | UGAAAGG |
| ENSG00000204439 | AGUGGUU |
| ENSG00000204439 | CAGCUGG |
| ENSG00000204439 | CCUGAG  |
| ENSG00000204439 | CUGGCUC |
| ENSG00000204439 | GCUGGUG |
| ENSG00000204439 | UAUUGCU |
| ENSG00000204439 | UGCUGAC |
| ENSG00000204442 | AAAGCUG |
| ENSG00000204442 | AAAUGGU |
| ENSG00000204442 | ACUCAGC |
| ENSG00000204442 | ACUGUAG |
| ENSG00000204442 | AGCCCUU |
| ENSG00000204442 | CAGACAG |
| ENSG00000204442 | GCCCUUA |
| ENSG00000204442 | GUAAACA |
| ENSG00000204442 | UGAAAUG |
| ENSG00000204442 | UGUAUAA |
| ENSG00000204463 | AAUACUG |
| ENSG00000204463 | ACUGUGU |
| ENSG00000204463 | GGGGGAA |
| ENSG00000204469 | AUACAAG |
| ENSG00000204469 | UAUAAUA |
| ENSG00000204531 | ACUGUGU |
| ENSG00000204539 | GAGCUAA |
| ENSG00000204539 | GGAGGAG |
| ENSG00000204564 | AGCAGCU |
| ENSG00000204564 | CAGUGCA |
| ENSG00000204564 | CUGGCUC |
| ENSG00000204569 | AAGUGCA |
| ENSG00000204569 | AAGUGCU |

|                 |         |
|-----------------|---------|
| ENSG00000204569 | AAUACUG |
| ENSG00000204569 | ACUGGAU |
| ENSG00000204569 | AUACAAG |
| ENSG00000204569 | CAGCUGG |
| ENSG00000204569 | CAGUCCA |
| ENSG00000204569 | CUUCUCU |
| ENSG00000204569 | GAAAACA |
| ENSG00000204569 | GAGCCCU |
| ENSG00000204569 | GGCAGUG |
| ENSG00000204569 | GUAGUGU |
| ENSG00000204569 | UCAUAGA |
| ENSG00000204576 | AAGGCAC |
| ENSG00000204576 | AAUACUG |
| ENSG00000204576 | ACAGGUG |
| ENSG00000204576 | ACAGUAC |
| ENSG00000204576 | AGCACCA |
| ENSG00000204576 | AGCAGCU |
| ENSG00000204576 | CAAAGCA |
| ENSG00000204576 | CACAAUG |
| ENSG00000204576 | CACAGGG |
| ENSG00000204576 | CCAGGAG |
| ENSG00000204576 | CCAGUGC |
| ENSG00000204576 | CCCACCU |
| ENSG00000204576 | CUCAGGG |
| ENSG00000204576 | GAAAACA |
| ENSG00000204576 | GAUCAGA |
| ENSG00000204576 | GGAGGCA |
| ENSG00000204576 | UCACAAG |
| ENSG00000204576 | UCACAGG |
| ENSG00000204576 | UCACAGU |
| ENSG00000204576 | UCCCACC |
| ENSG00000204576 | UCUCCAA |
| ENSG00000204576 | UGGAGAU |
| ENSG00000204576 | UUGGCAA |
| ENSG00000204576 | UUGGCAC |
| ENSG00000204580 | AGCCAGU |
| ENSG00000204580 | AUAUUAU |
| ENSG00000204580 | CAGCUGG |
| ENSG00000204580 | CCAGUGC |
| ENSG00000204580 | CCCCUGG |
| ENSG00000204580 | GGGUGGU |
| ENSG00000204580 | GUCUCUG |
| ENSG00000204590 | CAAAGCA |
| ENSG00000204599 | AAUCUCU |
| ENSG00000204599 | ACCACAG |
| ENSG00000204599 | CAGCAGG |
| ENSG00000204599 | CUGGAAA |
| ENSG00000204599 | CUGUUGA |
| ENSG00000204599 | GACCCUG |
| ENSG00000204599 | GUCUUGC |
| ENSG00000204599 | UCUGGAA |
| ENSG00000204618 | AGCACCA |
| ENSG00000204618 | GCACCAU |
| ENSG00000204618 | UAUUGCU |
| ENSG00000204619 | AAAGCUG |
| ENSG00000204619 | AAGUAGC |
| ENSG00000204619 | AGCAGCA |
| ENSG00000204619 | AGCAGCG |
| ENSG00000204619 | AGCAGCU |
| ENSG00000204619 | CAGACAG |
| ENSG00000204619 | CUGGAAA |
| ENSG00000204619 | GACCCUG |
| ENSG00000204619 | GAGAACC |
| ENSG00000204619 | GAGAACU |

|                 |         |
|-----------------|---------|
| ENSG00000204619 | UCUGGAA |
| ENSG00000204619 | UCUGGAG |
| ENSG00000204619 | UUGGCAA |
| ENSG00000204619 | UUGGCAC |
| ENSG00000204624 | CUCUCC  |
| ENSG00000204624 | CUGGCUC |
| ENSG00000204624 | GGCUCUG |
| ENSG00000204634 | AUAUUAU |
| ENSG00000204634 | AUUGCAC |
| ENSG00000204634 | CCAGUGC |
| ENSG00000204634 | CCAGUGU |
| ENSG00000204634 | CUUUGGU |
| ENSG00000204634 | GAAACAU |
| ENSG00000204645 | CAGUAGU |
| ENSG00000204673 | AAAACUG |
| ENSG00000204673 | AAGGCAC |
| ENSG00000204673 | AAUCUCA |
| ENSG00000204673 | CCCACCU |
| ENSG00000204673 | CCCUGAG |
| ENSG00000204673 | CUGCCCC |
| ENSG00000204673 | GUAGUGU |
| ENSG00000204673 | UGGCCAC |
| ENSG00000204681 | AACCUGU |
| ENSG00000204681 | AACUGGU |
| ENSG00000204681 | CCUUCUU |
| ENSG00000204681 | GCAGGUU |
| ENSG00000204681 | UGCCAGC |
| ENSG00000204681 | UUCUUGU |
| ENSG00000204682 | AAAGUUU |
| ENSG00000204682 | GGCGACA |
| ENSG00000204682 | UCACAGG |
| ENSG00000204682 | UCCCACA |
| ENSG00000204682 | UCCCACC |
| ENSG00000204682 | UUGGUUC |
| ENSG00000204682 | UUUGCAA |
| ENSG00000204688 | CUGCAGG |
| ENSG00000204688 | GGAAUGU |
| ENSG00000204688 | GGGGAGC |
| ENSG00000204688 | GUGGGGA |
| ENSG00000204694 | CCUGCUG |
| ENSG00000204713 | GUGCCUG |
| ENSG00000204764 | AACCUGG |
| ENSG00000204764 | AAGUCAC |
| ENSG00000204764 | GGCAUUG |
| ENSG00000204764 | GUCUCUG |
| ENSG00000204764 | UAGACUG |
| ENSG00000204764 | UCUAGAG |
| ENSG00000204764 | UUAUGCA |
| ENSG00000204764 | UUGGUUC |
| ENSG00000204839 | AGCACCA |
| ENSG00000204839 | GGGGUGG |
| ENSG00000204842 | AAAACUG |
| ENSG00000204842 | AAAAGUA |
| ENSG00000204842 | AAGUCUU |
| ENSG00000204842 | AAUCACU |
| ENSG00000204842 | AGCAGCG |
| ENSG00000204842 | AGCAGCU |
| ENSG00000204842 | GCUAGCA |
| ENSG00000204842 | UAUAAAG |
| ENSG00000204842 | UCCUAUA |
| ENSG00000204842 | UGUGCUU |
| ENSG00000204843 | CCCUGAG |
| ENSG00000204843 | CUUUGGU |
| ENSG00000204843 | GCAGAAG |

|                 |          |
|-----------------|----------|
| ENSG00000204856 | UUGGCAA  |
| ENSG00000204899 | AUAAAAGU |
| ENSG00000204899 | UAUGGUU  |
| ENSG00000204923 | ACUAGAU  |
| ENSG00000204946 | CAGGAAC  |
| ENSG00000204946 | UCCUGAG  |
| ENSG00000204952 | AAAAGUA  |
| ENSG00000204956 | AAAACUG  |
| ENSG00000204956 | CACCAGC  |
| ENSG00000204956 | GGAGGCA  |
| ENSG00000204956 | UGCAUAG  |
| ENSG00000204956 | UGGCCAC  |
| ENSG00000204962 | AAAGAAU  |
| ENSG00000204962 | AAGUGCA  |
| ENSG00000204962 | AGCAGCG  |
| ENSG00000204962 | AGCAGCU  |
| ENSG00000204962 | AUAAUAC  |
| ENSG00000204962 | CAAAGUG  |
| ENSG00000204962 | GAGGCAG  |
| ENSG00000204962 | UAAUACA  |
| ENSG00000204962 | UAAUAGU  |
| ENSG00000204962 | UACAAAG  |
| ENSG00000204962 | UAUAAUA  |
| ENSG00000204962 | UCAACAG  |
| ENSG00000204962 | UCACAUU  |
| ENSG00000204962 | UCAUACA  |
| ENSG00000204962 | UGCAUAG  |
| ENSG00000204962 | UGCAUAU  |
| ENSG00000204962 | UGUGCUU  |
| ENSG00000204962 | UUUGCAA  |
| ENSG00000204962 | UUUGCAC  |
| ENSG00000204963 | AAAGAAU  |
| ENSG00000204963 | AAGUGCA  |
| ENSG00000204963 | AGCAGCG  |
| ENSG00000204963 | AGCAGCU  |
| ENSG00000204963 | AUAAUAC  |
| ENSG00000204963 | CAAAGUG  |
| ENSG00000204963 | GAGGCAG  |
| ENSG00000204963 | UAAUACA  |
| ENSG00000204963 | UAAUAGU  |
| ENSG00000204963 | UACAAAG  |
| ENSG00000204963 | UAUAAUA  |
| ENSG00000204963 | UCAACAG  |
| ENSG00000204963 | UCACAUU  |
| ENSG00000204963 | UCAUACA  |
| ENSG00000204963 | UGCAUAG  |
| ENSG00000204963 | UGCAUAU  |
| ENSG00000204963 | UGUGCUU  |
| ENSG00000204963 | UUUGCAA  |
| ENSG00000204963 | UUUGCAC  |
| ENSG00000204965 | AAAGAAU  |
| ENSG00000204965 | AAGUGCA  |
| ENSG00000204965 | AGCAGCG  |
| ENSG00000204965 | AGCAGCU  |
| ENSG00000204965 | AUAAUAC  |
| ENSG00000204965 | CAAAGUG  |
| ENSG00000204965 | GAGGCAG  |
| ENSG00000204965 | UAAUACA  |
| ENSG00000204965 | UAAUAGU  |
| ENSG00000204965 | UACAAAG  |
| ENSG00000204965 | UAUAAUA  |
| ENSG00000204965 | UCAACAG  |
| ENSG00000204965 | UCACAUU  |
| ENSG00000204965 | UCAUACA  |

|                 |          |
|-----------------|----------|
| ENSG00000204965 | UGCAUAG  |
| ENSG00000204965 | UGCAUUAU |
| ENSG00000204965 | UGUGCUU  |
| ENSG00000204965 | UUUGCAA  |
| ENSG00000204965 | UUUGCAC  |
| ENSG00000204967 | AAAGAAU  |
| ENSG00000204967 | AAGUGCA  |
| ENSG00000204967 | AGCAGCG  |
| ENSG00000204967 | AGCAGCU  |
| ENSG00000204967 | AUAAUAC  |
| ENSG00000204967 | CAAAGUG  |
| ENSG00000204967 | GAGGCAG  |
| ENSG00000204967 | UAAUACA  |
| ENSG00000204967 | UAAUAGU  |
| ENSG00000204967 | UACAAAG  |
| ENSG00000204967 | UAUAAUA  |
| ENSG00000204967 | UCAACAG  |
| ENSG00000204967 | UCACAUU  |
| ENSG00000204967 | UCAUACA  |
| ENSG00000204967 | UGCAUAG  |
| ENSG00000204967 | UGCAUUAU |
| ENSG00000204967 | UGUGCUU  |
| ENSG00000204967 | UUUGCAA  |
| ENSG00000204967 | UUUGCAC  |
| ENSG00000204969 | AAAGAAU  |
| ENSG00000204969 | AAGUGCA  |
| ENSG00000204969 | AGCAGCG  |
| ENSG00000204969 | AGCAGCU  |
| ENSG00000204969 | AUAAUAC  |
| ENSG00000204969 | CAAAGUG  |
| ENSG00000204969 | GAGGCAG  |
| ENSG00000204969 | UAAUACA  |
| ENSG00000204969 | UAAUAGU  |
| ENSG00000204969 | UACAAAG  |
| ENSG00000204969 | UAUAAUA  |
| ENSG00000204969 | UCAACAG  |
| ENSG00000204969 | UCACAUU  |
| ENSG00000204969 | UCAUACA  |
| ENSG00000204969 | UGCAUAG  |
| ENSG00000204969 | UGCAUUAU |
| ENSG00000204969 | UGUGCUU  |
| ENSG00000204969 | UUUGCAA  |
| ENSG00000204969 | UUUGCAC  |
| ENSG00000204970 | AAAGAAU  |
| ENSG00000204970 | AAGUGCA  |
| ENSG00000204970 | AGCAGCG  |
| ENSG00000204970 | AGCAGCU  |
| ENSG00000204970 | AUAAUAC  |
| ENSG00000204970 | CAAAGUG  |
| ENSG00000204970 | GAGGCAG  |
| ENSG00000204970 | UAAUACA  |
| ENSG00000204970 | UAAUAGU  |
| ENSG00000204970 | UACAAAG  |
| ENSG00000204970 | UAUAAUA  |
| ENSG00000204970 | UCAACAG  |
| ENSG00000204970 | UCACAUU  |
| ENSG00000204970 | UCAUACA  |
| ENSG00000204970 | UGCAUAG  |
| ENSG00000204970 | UGCAUUAU |
| ENSG00000204970 | UGUGCUU  |
| ENSG00000204970 | UUUGCAA  |
| ENSG00000204970 | UUUGCAC  |
| ENSG00000204977 | GGGAACG  |
| ENSG00000204977 | UUUGCAA  |

|                 |         |
|-----------------|---------|
| ENSG00000204991 | UAGGCCG |
| ENSG00000204991 | UCCUGAG |
| ENSG00000205056 | AAAUUUC |
| ENSG00000205056 | ACAUUAC |
| ENSG00000205056 | AGUAACA |
| ENSG00000205056 | AUGGAUU |
| ENSG00000205056 | GAGAAAU |
| ENSG00000205056 | GAGCUAA |
| ENSG00000205056 | GAGGCAG |
| ENSG00000205056 | GUAACAG |
| ENSG00000205056 | UCAUUUG |
| ENSG00000205056 | UGAAAGG |
| ENSG00000205056 | UGAGAAU |
| ENSG00000205056 | UGCUGAC |
| ENSG00000205056 | UGGAGAU |
| ENSG00000205056 | UUUUUGC |
| ENSG00000205060 | CUCAGGG |
| ENSG00000205089 | CAGCUGG |
| ENSG00000205089 | CUGCUCA |
| ENSG00000205089 | GAGGCAG |
| ENSG00000205155 | AAGUCUU |
| ENSG00000205189 | AGCACCA |
| ENSG00000205189 | CUACAGU |
| ENSG00000205189 | GAGGUAU |
| ENSG00000205189 | GUAGUGU |
| ENSG00000205189 | UCACAGG |
| ENSG00000205189 | UCACAGU |
| ENSG00000205189 | UUGGUCC |
| ENSG00000205208 | GUAUUCU |
| ENSG00000205208 | UACAAAG |
| ENSG00000205213 | ACUGGCC |
| ENSG00000205213 | ACUGGCU |
| ENSG00000205213 | GAGGUAG |
| ENSG00000205213 | GGCAGCG |
| ENSG00000205213 | UCCUGAG |
| ENSG00000205213 | UGGCCCU |
| ENSG00000205250 | AAAAAUC |
| ENSG00000205250 | AAAAGUA |
| ENSG00000205250 | AAUCUCU |
| ENSG00000205250 | CAGUCUG |
| ENSG00000205250 | UUCUAAU |
| ENSG00000205269 | AAAACUG |
| ENSG00000205269 | AACCUGG |
| ENSG00000205269 | AACCUGU |
| ENSG00000205269 | AAGGCAC |
| ENSG00000205269 | ACCCUGU |
| ENSG00000205269 | AGCAGCA |
| ENSG00000205269 | AGCAGCG |
| ENSG00000205269 | AGCAGCU |
| ENSG00000205269 | AGUGCUG |
| ENSG00000205269 | AUGCAUU |
| ENSG00000205269 | CACAGUG |
| ENSG00000205269 | CAGUAGU |
| ENSG00000205269 | CCCUGAG |
| ENSG00000205269 | CCCUGUC |
| ENSG00000205269 | CCCUGUU |
| ENSG00000205269 | CUUGUAU |
| ENSG00000205269 | CUUUGGU |
| ENSG00000205269 | GCCCUUA |
| ENSG00000205269 | UAGGCCG |
| ENSG00000205269 | UCACAGG |
| ENSG00000205269 | UCACAUU |
| ENSG00000205269 | UCCUGU  |
| ENSG00000205269 | UGCAAAG |

|                 |         |
|-----------------|---------|
| ENSG00000205269 | UGCAUAG |
| ENSG00000205269 | UUGGCAA |
| ENSG00000205279 | AAGUCUU |
| ENSG00000205279 | AUUCAUU |
| ENSG00000205302 | AAGACAU |
| ENSG00000205302 | CAGUCCA |
| ENSG00000205302 | GGUUUAC |
| ENSG00000205302 | UGCAGCU |
| ENSG00000205336 | AAGUCUU |
| ENSG00000205336 | UACAGUU |
| ENSG00000205339 | AGCUGCC |
| ENSG00000205339 | CCUUCAU |
| ENSG00000205339 | CUGGAAA |
| ENSG00000205352 | UGAAGCU |
| ENSG00000205420 | CUGCAGC |
| ENSG00000205423 | AAAAACC |
| ENSG00000205423 | AAAGAAU |
| ENSG00000205423 | AACACUG |
| ENSG00000205423 | ACCACAG |
| ENSG00000205423 | UACAGUU |
| ENSG00000205423 | UUCAAAU |
| ENSG00000205426 | AAAGUGC |
| ENSG00000205426 | CAAAGUG |
| ENSG00000205445 | GGCAGGG |
| ENSG00000205531 | AUGCAUU |
| ENSG00000205531 | UAAUAGU |
| ENSG00000205531 | UACAAAG |
| ENSG00000205531 | UCCUAG  |
| ENSG00000205542 | ACUGCAU |
| ENSG00000205542 | AGUAGUU |
| ENSG00000205542 | CAGUAGA |
| ENSG00000205542 | CAGUGCA |
| ENSG00000205542 | CUUACAG |
| ENSG00000205560 | CAGCUGG |
| ENSG00000205581 | UACAAAG |
| ENSG00000205629 | CUGGCUC |
| ENSG00000205683 | CUUUGGU |
| ENSG00000205726 | AAGUCAC |
| ENSG00000205726 | AGCAUUC |
| ENSG00000205726 | CUCCCAA |
| ENSG00000205726 | CUCCCAC |
| ENSG00000205726 | GCUGGAU |
| ENSG00000205726 | GGCAGUG |
| ENSG00000205726 | UCCUCU  |
| ENSG00000205726 | UGUGCUU |
| ENSG00000205726 | UUCAAGC |
| ENSG00000205726 | UUGAGGC |
| ENSG00000205808 | AGGUAGU |
| ENSG00000205808 | CUUUGGU |
| ENSG00000205808 | GAGGUAG |
| ENSG00000205808 | GUGCCUG |
| ENSG00000205838 | ACAAGGU |
| ENSG00000205838 | ACCAAU  |
| ENSG00000205916 | GAUUGGU |
| ENSG00000205916 | UCUUGAG |
| ENSG00000205927 | AAUCUCA |
| ENSG00000205927 | UACAAAG |
| ENSG00000205927 | UUUGCAC |
| ENSG00000205927 | UUUUUGC |
| ENSG00000205929 | AAAUCCC |
| ENSG00000205937 | AAAGUAC |
| ENSG00000205937 | AACCUGG |
| ENSG00000205937 | AACCUGU |
| ENSG00000205937 | ACUCAA  |



|                 |         |
|-----------------|---------|
| ENSG00000205937 | CUACAAA |
| ENSG00000205937 | GCUACAU |
| ENSG00000205937 | GGCUCUG |
| ENSG00000205937 | UACAAAG |
| ENSG00000205937 | UGACUGU |
| ENSG00000205944 | GAUUGGU |
| ENSG00000205944 | UCUUGAG |
| ENSG00000205981 | GAGGCAG |
| ENSG00000206026 | ACAAGGU |
| ENSG00000206026 | ACAGUAC |
| ENSG00000206026 | ACAGUAU |
| ENSG00000206026 | ACAUCAC |
| ENSG00000206026 | AGCACCA |
| ENSG00000206026 | CAGCUGG |
| ENSG00000206026 | GGUGGUC |
| ENSG00000206026 | GUUAAUG |
| ENSG00000206026 | UACAGUU |
| ENSG00000206026 | UAUAUGA |
| ENSG00000206026 | UAUUACC |
| ENSG00000206026 | UGAGGAC |
| ENSG00000206026 | UUGACAC |
| ENSG00000206026 | UUGAUCA |
| ENSG00000206053 | AAAUGGU |
| ENSG00000206053 | AAUGUUG |
| ENSG00000206053 | ACUCAA  |
| ENSG00000206053 | CCCACCG |
| ENSG00000206053 | CUGCAGG |
| ENSG00000206053 | CUUUGGU |
| ENSG00000206053 | GGUUGAC |
| ENSG00000206053 | UUGGCAC |
| ENSG00000206053 | UUGGUUC |
| ENSG00000206190 | GAAACAU |
| ENSG00000206190 | UCAAGUA |
| ENSG00000206190 | UUCAAGC |
| ENSG00000206384 | AGCACCA |
| ENSG00000206384 | UUUCAAC |
| ENSG00000206418 | AAAGUGC |
| ENSG00000206418 | AAUUUUA |
| ENSG00000206527 | ACUCAA  |
| ENSG00000206527 | ACUGGAU |
| ENSG00000206527 | CUGCAGG |
| ENSG00000206538 | AAGUGCA |
| ENSG00000206538 | ACACACU |
| ENSG00000206538 | AGCAAAA |
| ENSG00000206538 | AGCAUUC |
| ENSG00000206538 | AGUGCAA |
| ENSG00000206538 | AGUGCUU |
| ENSG00000206538 | GAAAACA |
| ENSG00000206538 | GAGGUAG |
| ENSG00000206538 | GAGGUAU |
| ENSG00000206538 | GGCUCAG |
| ENSG00000206538 | GUAUUCU |
| ENSG00000206538 | UCAUUCG |
| ENSG00000206538 | UGCCAGC |
| ENSG00000206538 | UGCUGAC |
| ENSG00000206538 | UUGGCAC |
| ENSG00000206560 | AAAGAAU |
| ENSG00000206560 | AAAGGUA |
| ENSG00000206560 | AAAGUUU |
| ENSG00000206560 | ACAGUAU |
| ENSG00000206560 | ACAUUAC |
| ENSG00000206560 | ACUGUUU |
| ENSG00000206560 | AGGGAGG |
| ENSG00000206560 | AGUGCAA |

|                 |         |
|-----------------|---------|
| ENSG00000206560 | CACAAUG |
| ENSG00000206560 | CUAGUAG |
| ENSG00000206560 | CUGGAAA |
| ENSG00000206560 | GAGGUAG |
| ENSG00000206560 | GGACUGC |
| ENSG00000206560 | UAUUGCU |
| ENSG00000206560 | UCACAAG |
| ENSG00000206560 | UCACACA |
| ENSG00000206560 | UGGACUG |
| ENSG00000206561 | AACAGUC |
| ENSG00000206561 | AAGACAU |
| ENSG00000206561 | CAGCAGG |
| ENSG00000206561 | UAAGACG |
| ENSG00000206561 | UAAGACU |
| ENSG00000206561 | UCCAGUU |
| ENSG00000206579 | AGCACCA |
| ENSG00000206579 | GAGGUAU |
| ENSG00000206579 | GCACCAU |
| ENSG00000206579 | UGCAUAG |
| ENSG00000206579 | UUGGCAA |
| ENSG00000206579 | UUGGCAC |
| ENSG00000211445 | CAGGAAC |
| ENSG00000211445 | CAGGCUC |
| ENSG00000211445 | GCAGAAG |
| ENSG00000211445 | GGAGGCA |
| ENSG00000211448 | AAAACUG |
| ENSG00000211448 | AAUCUCA |
| ENSG00000211448 | ACAUCAC |
| ENSG00000211448 | ACUGGCC |
| ENSG00000211448 | AGUACUG |
| ENSG00000211448 | CUUUGGU |
| ENSG00000211448 | GACUUC  |
| ENSG00000211448 | GAGACCU |
| ENSG00000211448 | GUAAACA |
| ENSG00000211448 | UCACAAG |
| ENSG00000211448 | UCCUGAG |
| ENSG00000211448 | UGAAAUG |
| ENSG00000211450 | ACAUCAC |
| ENSG00000211450 | UGGCCAC |
| ENSG00000211452 | AAGUCAC |
| ENSG00000211452 | GAGCUAA |
| ENSG00000211455 | AAAAACC |
| ENSG00000211455 | AAAGUUU |
| ENSG00000211455 | AGCACCA |
| ENSG00000211455 | AGGCAGG |
| ENSG00000211455 | AGUAGUU |
| ENSG00000211455 | AUGGCAC |
| ENSG00000211455 | AUGGCUU |
| ENSG00000211455 | CACAGUG |
| ENSG00000211455 | CAGCUGG |
| ENSG00000211455 | CAGUGCA |
| ENSG00000211455 | CUACAAA |
| ENSG00000211455 | CUUUGGU |
| ENSG00000211455 | GGCAGUG |
| ENSG00000211455 | UACAGUU |
| ENSG00000211455 | UCCAGUU |
| ENSG00000211455 | UGCAGCU |
| ENSG00000211455 | UGGUACC |
| ENSG00000211455 | UCCUCG  |
| ENSG00000211456 | AAAGAAU |
| ENSG00000211456 | ACUCCAG |
| ENSG00000211460 | AAGUCAC |
| ENSG00000211460 | AUGACAC |
| ENSG00000212747 | AGGUAGU |

|                 |         |
|-----------------|---------|
| ENSG00000212864 | GGCUGCG |
| ENSG00000212864 | UUGGCAC |
| ENSG00000212916 | AGCAAAA |
| ENSG00000213015 | GAGGGGC |
| ENSG00000213015 | GGAAUGU |
| ENSG00000213023 | AGCAGCA |
| ENSG00000213023 | AUGGCUU |
| ENSG00000213023 | CCCCAG  |
| ENSG00000213047 | AAGGCAC |
| ENSG00000213057 | AAGACAU |
| ENSG00000213064 | CAGGCUC |
| ENSG00000213066 | AAGGCAC |
| ENSG00000213066 | CUGCAGC |
| ENSG00000213066 | CUGCAGG |
| ENSG00000213066 | GAUUGUA |
| ENSG00000213071 | AGUAGUU |
| ENSG00000213071 | CCCACCG |
| ENSG00000213071 | CUGGGGG |
| ENSG00000213071 | UCAUAGA |
| ENSG00000213079 | AAAAACC |
| ENSG00000213079 | AAAGGUA |
| ENSG00000213079 | AAUCUCU |
| ENSG00000213079 | ACUGCAG |
| ENSG00000213079 | GAGAUGA |
| ENSG00000213079 | GUCAGUU |
| ENSG00000213079 | UCCAUA  |
| ENSG00000213171 | CAGCAGG |
| ENSG00000213171 | GCAGGUU |
| ENSG00000213186 | CAAGAGC |
| ENSG00000213186 | CUGGAAA |
| ENSG00000213186 | UCUGGAA |
| ENSG00000213190 | AGCACCA |
| ENSG00000213190 | CACCACC |
| ENSG00000213190 | GGAGAGA |
| ENSG00000213190 | UGUCUUU |
| ENSG00000213204 | AAUUAUU |
| ENSG00000213213 | CUGGAAA |
| ENSG00000213240 | AAAAACC |
| ENSG00000213240 | AAUCACU |
| ENSG00000213240 | ACACACU |
| ENSG00000213240 | GACUUCC |
| ENSG00000213240 | GAUAUGU |
| ENSG00000213240 | GGAGGAG |
| ENSG00000213240 | UCUCAAG |
| ENSG00000213240 | UGGAUAA |
| ENSG00000213265 | CCCACCG |
| ENSG00000213281 | AGGAGCU |
| ENSG00000213281 | CAGUGCA |
| ENSG00000213281 | CUCUGGG |
| ENSG00000213281 | GAGGUAG |
| ENSG00000213281 | GGCUCUG |
| ENSG00000213341 | AGCAAAA |
| ENSG00000213341 | AUAUUAU |
| ENSG00000213341 | CAGCAAA |
| ENSG00000213347 | AAUACUG |
| ENSG00000213390 | AAGGCAC |
| ENSG00000213390 | ACUGGCC |
| ENSG00000213390 | AUGGCUU |
| ENSG00000213390 | CCAGUGC |
| ENSG00000213390 | CCAGUGU |
| ENSG00000213390 | CUGGCUC |
| ENSG00000213390 | CUGGGCA |
| ENSG00000213390 | GAGGUAU |
| ENSG00000213390 | GGCUCAG |

|                 |          |
|-----------------|----------|
| ENSG00000213390 | UAGAGGA  |
| ENSG00000213390 | UCCUCUCU |
| ENSG00000213390 | UGACCUA  |
| ENSG00000213420 | AACACUG  |
| ENSG00000213420 | GGGCCCC  |
| ENSG00000213445 | GGCAGUG  |
| ENSG00000213445 | UACAAAG  |
| ENSG00000213445 | UCCUGAG  |
| ENSG00000213463 | AAGUCUU  |
| ENSG00000213463 | CCCACCU  |
| ENSG00000213463 | CUAGUAA  |
| ENSG00000213463 | CUUUGGU  |
| ENSG00000213463 | GCCUGAU  |
| ENSG00000213463 | UGCAAAG  |
| ENSG00000213463 | UGCCAGC  |
| ENSG00000213465 | CAGCAGG  |
| ENSG00000213465 | GGAGGAG  |
| ENSG00000213465 | GGGGUGG  |
| ENSG00000213533 | AGUGCAA  |
| ENSG00000213533 | GAGGUAG  |
| ENSG00000213533 | GCAACUU  |
| ENSG00000213533 | GGAAGAC  |
| ENSG00000213533 | GUAGUGU  |
| ENSG00000213533 | UCACAGU  |
| ENSG00000213533 | UGCAUAG  |
| ENSG00000213533 | UUGGUCC  |
| ENSG00000213551 | UACAAAG  |
| ENSG00000213578 | GCCUGGA  |
| ENSG00000213578 | UGAAGCU  |
| ENSG00000213578 | UGCCAGC  |
| ENSG00000213588 | AAAGGUA  |
| ENSG00000213588 | AAGUGCU  |
| ENSG00000213588 | AGCAGCA  |
| ENSG00000213588 | UCCUGAG  |
| ENSG00000213614 | CACAGGG  |
| ENSG00000213614 | GCCUGGG  |
| ENSG00000213614 | GGAAGCC  |
| ENSG00000213625 | UAUAAAAG |
| ENSG00000213626 | AAAAGUA  |
| ENSG00000213626 | AGGAGCU  |
| ENSG00000213626 | AGUAGUU  |
| ENSG00000213626 | CAGUUAC  |
| ENSG00000213626 | GAGAUGA  |
| ENSG00000213626 | GAGGUAG  |
| ENSG00000213626 | GCAGGUU  |
| ENSG00000213626 | GUGCAA   |
| ENSG00000213626 | UAUUGCU  |
| ENSG00000213626 | UCACAGU  |
| ENSG00000213639 | AAAGCUG  |
| ENSG00000213639 | AACUGGU  |
| ENSG00000213639 | AAGACAU  |
| ENSG00000213639 | AAUUAUU  |
| ENSG00000213639 | ACAUUCA  |
| ENSG00000213639 | ACCACAG  |
| ENSG00000213639 | ACCAGCA  |
| ENSG00000213639 | ACCCGUA  |
| ENSG00000213639 | ACUGCAG  |
| ENSG00000213639 | ACUGCAU  |
| ENSG00000213639 | ACUGGAU  |
| ENSG00000213639 | AGCAAAA  |
| ENSG00000213639 | AGCAUUC  |
| ENSG00000213639 | AUGAGCU  |
| ENSG00000213639 | AUGCAUU  |
| ENSG00000213639 | CAGGCUC  |

|                 |          |
|-----------------|----------|
| ENSG00000213639 | CAGGUGA  |
| ENSG00000213639 | CAGUGCA  |
| ENSG00000213639 | CUACAAA  |
| ENSG00000213639 | CUAUACA  |
| ENSG00000213639 | CUCUUC   |
| ENSG00000213639 | GACAACU  |
| ENSG00000213639 | GCAGGUU  |
| ENSG00000213639 | GCUGGAU  |
| ENSG00000213639 | GGAUUUC  |
| ENSG00000213639 | GGAUUUU  |
| ENSG00000213639 | GGUUUAC  |
| ENSG00000213639 | GUGACAG  |
| ENSG00000213639 | GUUAAUG  |
| ENSG00000213639 | UACAAAG  |
| ENSG00000213639 | UACAGUU  |
| ENSG00000213639 | UAGUGAG  |
| ENSG00000213639 | UAUUACC  |
| ENSG00000213639 | UAUUGCU  |
| ENSG00000213639 | UGAAAUG  |
| ENSG00000213639 | UGAAGCU  |
| ENSG00000213639 | UGACAUC  |
| ENSG00000213639 | UGUUGAA  |
| ENSG00000213639 | UUGACAC  |
| ENSG00000213639 | UUGAUCA  |
| ENSG00000213654 | GUCUCUG  |
| ENSG00000213658 | AAGGUGC  |
| ENSG00000213658 | CAAAGUG  |
| ENSG00000213658 | CAGGCUC  |
| ENSG00000213658 | CUCAGGG  |
| ENSG00000213672 | AAGGCAC  |
| ENSG00000213672 | AGUGCAA  |
| ENSG00000213672 | AUGGCUU  |
| ENSG00000213672 | CUGCAGG  |
| ENSG00000213672 | GUGCAA   |
| ENSG00000213676 | AGUGCUU  |
| ENSG00000213694 | UCCUCU   |
| ENSG00000213699 | CACCAGC  |
| ENSG00000213699 | CCUGCUG  |
| ENSG00000213699 | GCCUGGA  |
| ENSG00000213741 | AAUGUUG  |
| ENSG00000213741 | AUACCUC  |
| ENSG00000213741 | UGGCCCU  |
| ENSG00000213760 | CCCUGUU  |
| ENSG00000213853 | AAAAACC  |
| ENSG00000213853 | AUACAAG  |
| ENSG00000213859 | ACACACC  |
| ENSG00000213859 | CAGGUGA  |
| ENSG00000213859 | CUUGGGC  |
| ENSG00000213865 | AAAUUUC  |
| ENSG00000213865 | GGAUGAG  |
| ENSG00000213901 | ACCCUGU  |
| ENSG00000213901 | GACCCUG  |
| ENSG00000213923 | AAAAGUA  |
| ENSG00000213923 | AAAGCUG  |
| ENSG00000213923 | AAAGUAC  |
| ENSG00000213923 | AACACUG  |
| ENSG00000213923 | UAUUACC  |
| ENSG00000213923 | UCUGGAA  |
| ENSG00000213923 | UUCAAAU  |
| ENSG00000213928 | GUGCUUG  |
| ENSG00000213928 | UAUAAAAG |
| ENSG00000213977 | CAGCAGG  |
| ENSG00000213977 | GCAGAAG  |
| ENSG00000213977 | UCCUGAG  |

|                 |          |
|-----------------|----------|
| ENSG00000213983 | CCUGCUG  |
| ENSG00000214013 | UGAGAAU  |
| ENSG00000214014 | GAGGCUG  |
| ENSG00000214021 | UCACAGG  |
| ENSG00000214022 | UAUUGCU  |
| ENSG00000214046 | GGAUUUC  |
| ENSG00000214046 | GGUUUAC  |
| ENSG00000214063 | AGCACCA  |
| ENSG00000214063 | GGAAUGU  |
| ENSG00000214078 | AAAGUAU  |
| ENSG00000214113 | GGUGGUC  |
| ENSG00000214114 | AAGGCAC  |
| ENSG00000214114 | ACAUUCA  |
| ENSG00000214114 | ACCCUGU  |
| ENSG00000214114 | AGAUAAA  |
| ENSG00000214114 | AGCUGCC  |
| ENSG00000214114 | AGGCAGG  |
| ENSG00000214114 | AUACAAG  |
| ENSG00000214114 | CAAAGUG  |
| ENSG00000214114 | GAAGGAA  |
| ENSG00000214114 | GAGAAGA  |
| ENSG00000214114 | GAGGUAG  |
| ENSG00000214114 | GAGGUAU  |
| ENSG00000214114 | GGGAACG  |
| ENSG00000214114 | GUGAGGU  |
| ENSG00000214114 | UAUCAGA  |
| ENSG00000214114 | UCACAGG  |
| ENSG00000214114 | UCACAGU  |
| ENSG00000214114 | UCAUACA  |
| ENSG00000214114 | UGAGAAG  |
| ENSG00000214114 | UGCAUUAU |
| ENSG00000214128 | UUCUUGU  |
| ENSG00000214140 | AGCAGCU  |
| ENSG00000214140 | AGCUGCC  |
| ENSG00000214140 | CAGCUGG  |
| ENSG00000214140 | CUGGGGG  |
| ENSG00000214140 | GAGAAAU  |
| ENSG00000214193 | AUGUCUG  |
| ENSG00000214193 | CUGGCUC  |
| ENSG00000214193 | GGCAGCG  |
| ENSG00000214193 | UUCCUCG  |
| ENSG00000214435 | GAAGGAA  |
| ENSG00000214517 | CCCUGAG  |
| ENSG00000214517 | CUGGGCA  |
| ENSG00000214517 | GUGCUUG  |
| ENSG00000214517 | UCACAGU  |
| ENSG00000214517 | UGUGCUU  |
| ENSG00000214575 | AAAGCUG  |
| ENSG00000214575 | AAGGCAC  |
| ENSG00000214575 | ACAGUAC  |
| ENSG00000214575 | ACAGUAU  |
| ENSG00000214575 | ACCAGCA  |
| ENSG00000214575 | AGCCCUU  |
| ENSG00000214575 | AUGGCAC  |
| ENSG00000214575 | AUUGCAC  |
| ENSG00000214575 | CUUUGGU  |
| ENSG00000214575 | GAGACCU  |
| ENSG00000214575 | GAGGUAU  |
| ENSG00000214575 | GGAAUGU  |
| ENSG00000214575 | GUCUUGC  |
| ENSG00000214575 | GUGCAAA  |
| ENSG00000214575 | UACAGUU  |
| ENSG00000214575 | UUGGCAA  |
| ENSG00000214655 | GCUGUCU  |

|                 |          |
|-----------------|----------|
| ENSG00000214655 | UAUAAAG  |
| ENSG00000214706 | UUGGUUC  |
| ENSG00000214717 | GGUUUAC  |
| ENSG00000214753 | AACAAAC  |
| ENSG00000214753 | AAGACAU  |
| ENSG00000214753 | AAGUGCU  |
| ENSG00000214753 | ACAAUUAU |
| ENSG00000214753 | GGUUGUC  |
| ENSG00000214753 | UACAAAG  |
| ENSG00000214753 | UACAGUU  |
| ENSG00000214753 | UCAACAG  |
| ENSG00000214827 | AGCAGCG  |
| ENSG00000214827 | AGGAGCU  |
| ENSG00000214827 | CUUCUCU  |
| ENSG00000214827 | GAAGGAA  |
| ENSG00000214872 | UAAUGCU  |
| ENSG00000214882 | CUGCUCU  |
| ENSG00000214882 | GCCUGGG  |
| ENSG00000214882 | GUAAACA  |
| ENSG00000214882 | UCCUUG   |
| ENSG00000214882 | UUAUGCA  |
| ENSG00000214882 | UUCAAGC  |
| ENSG00000214882 | UUUCAAC  |
| ENSG00000215012 | CAAAGUG  |
| ENSG00000215012 | CUCACAC  |
| ENSG00000215012 | GCUUCCU  |
| ENSG00000215012 | UCACACA  |
| ENSG00000215012 | UCAUUCG  |
| ENSG00000215012 | UCCAGUU  |
| ENSG00000215021 | AAAAAUC  |
| ENSG00000215021 | AAUCACU  |
| ENSG00000215021 | GAGAAAU  |
| ENSG00000215021 | UGAGAAG  |
| ENSG00000215193 | CUGGAAA  |
| ENSG00000215193 | GUAACAG  |
| ENSG00000215252 | GUGCAAA  |
| ENSG00000215262 | CCAGUGC  |
| ENSG00000215262 | CCAGUGU  |
| ENSG00000215271 | AAGUUGU  |
| ENSG00000215271 | AGUAACA  |
| ENSG00000215271 | CAAAGUG  |
| ENSG00000215301 | AAAAGUA  |
| ENSG00000215301 | AAAGAAU  |
| ENSG00000215301 | AAAGUAU  |
| ENSG00000215301 | AACAUUC  |
| ENSG00000215301 | AAGUCAC  |
| ENSG00000215301 | AAGUGCA  |
| ENSG00000215301 | AAUACUG  |
| ENSG00000215301 | AAUCACU  |
| ENSG00000215301 | AAUUGCU  |
| ENSG00000215301 | ACAAGGU  |
| ENSG00000215301 | ACAAUUAU |
| ENSG00000215301 | ACAGUAC  |
| ENSG00000215301 | ACAUCAC  |
| ENSG00000215301 | ACAUUAC  |
| ENSG00000215301 | AGCAAAA  |
| ENSG00000215301 | AGCAGCG  |
| ENSG00000215301 | AGCAGCU  |
| ENSG00000215301 | AGCCAGU  |
| ENSG00000215301 | AGCCUGC  |
| ENSG00000215301 | AGGACAC  |
| ENSG00000215301 | AGUGCUU  |
| ENSG00000215301 | AUAUAAC  |
| ENSG00000215301 | AUGGCUU  |

|                 |         |
|-----------------|---------|
| ENSG00000215301 | AUGUGCC |
| ENSG00000215301 | CACACCG |
| ENSG00000215301 | CAGCUGG |
| ENSG00000215301 | CCAGGAG |
| ENSG00000215301 | CCAGUGU |
| ENSG00000215301 | CCUGCUG |
| ENSG00000215301 | CUACAGU |
| ENSG00000215301 | CUCACAC |
| ENSG00000215301 | CUGGACU |
| ENSG00000215301 | CUGGCUC |
| ENSG00000215301 | CUUUGGU |
| ENSG00000215301 | GAAAACA |
| ENSG00000215301 | GAGGAUA |
| ENSG00000215301 | GCAACUU |
| ENSG00000215301 | GCACCAU |
| ENSG00000215301 | GGAAUGU |
| ENSG00000215301 | GGAUGAG |
| ENSG00000215301 | GUGAAUG |
| ENSG00000215301 | GUGCCAC |
| ENSG00000215301 | GUUCAUG |
| ENSG00000215301 | UAAGACG |
| ENSG00000215301 | UAAGACU |
| ENSG00000215301 | UACAAAG |
| ENSG00000215301 | UACAGUU |
| ENSG00000215301 | UAUCAGA |
| ENSG00000215301 | UCAACAG |
| ENSG00000215301 | UCUGGAG |
| ENSG00000215301 | UGAGAAU |
| ENSG00000215301 | UGAGGAC |
| ENSG00000215301 | UGCAUUG |
| ENSG00000215301 | UGGCCAC |
| ENSG00000215301 | UGUCUUU |
| ENSG00000215301 | UUCAAAU |
| ENSG00000215301 | UUGAUCA |
| ENSG00000215301 | UUGGUCC |
| ENSG00000215301 | UUUUUGC |
| ENSG00000215386 | GAUUGGU |
| ENSG00000215386 | GUCACUC |
| ENSG00000215386 | UGGCUGC |
| ENSG00000215397 | AAAGUGC |
| ENSG00000215397 | AAGUGCU |
| ENSG00000215397 | AAUACUG |
| ENSG00000215397 | AAUUAUU |
| ENSG00000215397 | AGGUAGU |
| ENSG00000215397 | CAGCUGG |
| ENSG00000215397 | CAGUCCA |
| ENSG00000215397 | GAGGUAG |
| ENSG00000215397 | GGCUCAG |
| ENSG00000215397 | GGGGUCC |
| ENSG00000215397 | GUGCUUG |
| ENSG00000215397 | UAAUAUC |
| ENSG00000215397 | UGCAUAG |
| ENSG00000215397 | UGCAUAU |
| ENSG00000215397 | UGUGCUU |
| ENSG00000215421 | CUUUGGU |
| ENSG00000215421 | UUCAAAU |
| ENSG00000215440 | AAUUGCU |
| ENSG00000215440 | CAAAGUG |
| ENSG00000215440 | GAGGUAG |
| ENSG00000215440 | GAGGUAU |
| ENSG00000215440 | GUGAGGU |
| ENSG00000215440 | GUGCAA  |
| ENSG00000215440 | UGCAAAG |
| ENSG00000215454 | CAGCAGG |



|                 |          |
|-----------------|----------|
| ENSG00000215455 | CAGCAGA  |
| ENSG00000215455 | CAGCAGG  |
| ENSG00000215568 | CUCCAC   |
| ENSG00000215712 | AAAGAAU  |
| ENSG00000215712 | AACAUUC  |
| ENSG00000215712 | AAGUCUU  |
| ENSG00000215712 | ACAAUUAU |
| ENSG00000215712 | ACAUUAC  |
| ENSG00000215712 | AGAUAAA  |
| ENSG00000215712 | AGUGCUG  |
| ENSG00000215712 | AGUGCUU  |
| ENSG00000215712 | AUGGAUU  |
| ENSG00000215712 | CAAUUGC  |
| ENSG00000215712 | CAGCAA   |
| ENSG00000215712 | CCAGGAG  |
| ENSG00000215712 | CCAUUAC  |
| ENSG00000215712 | GGAUUUC  |
| ENSG00000215712 | GGUCUAG  |
| ENSG00000215712 | UAAUAGU  |
| ENSG00000215712 | UGAAAUG  |
| ENSG00000215712 | UUAUGCA  |
| ENSG00000215712 | UUCAAAU  |
| ENSG00000215712 | UUCCAUA  |
| ENSG00000215717 | ACAAGGU  |
| ENSG00000215717 | ACCCUGU  |
| ENSG00000215717 | GUGCAA   |
| ENSG00000215788 | GUCUACU  |
| ENSG00000216490 | GCACCAU  |
| ENSG00000216937 | AAAGUAU  |
| ENSG00000217128 | AAACUGU  |
| ENSG00000217128 | AGGUAGU  |
| ENSG00000217128 | AGGUUAU  |
| ENSG00000217128 | AGUAGAC  |
| ENSG00000217128 | AUCCCUU  |
| ENSG00000217128 | CUUACAG  |
| ENSG00000217128 | CUUGGGC  |
| ENSG00000217128 | CUUUGGU  |
| ENSG00000217128 | GAAAACA  |
| ENSG00000217128 | GAAACAU  |
| ENSG00000217128 | GAGGUAU  |
| ENSG00000217128 | UAAGACG  |
| ENSG00000217128 | UAAGACU  |
| ENSG00000217128 | UAAUACA  |
| ENSG00000217128 | UCAAGUA  |
| ENSG00000217128 | UCCUAUA  |
| ENSG00000217128 | UGACAUC  |
| ENSG00000217128 | UUGGUUC  |
| ENSG00000217128 | UUUUUGC  |
| ENSG00000218336 | AAGGUGC  |
| ENSG00000218336 | ACAGUAC  |
| ENSG00000218336 | ACAGUAU  |
| ENSG00000218336 | ACUGUAG  |
| ENSG00000218336 | AGUGCCU  |
| ENSG00000218336 | AUGCAUU  |
| ENSG00000218336 | AUGUAAU  |
| ENSG00000218336 | AUUCAUU  |
| ENSG00000218336 | CAAAGCA  |
| ENSG00000218336 | UCACACA  |
| ENSG00000218336 | UGCAUUAU |
| ENSG00000218336 | UGUGCUU  |
| ENSG00000218823 | AAAUCCC  |
| ENSG00000218823 | AAAUUUC  |
| ENSG00000218823 | AAGUGCU  |
| ENSG00000218823 | CAAAGCA  |

|                 |         |
|-----------------|---------|
| ENSG00000218823 | CAGUUAC |
| ENSG00000218823 | GCCUGGA |
| ENSG00000218823 | GCCUGGG |
| ENSG00000218823 | GUGCCAC |
| ENSG00000218891 | CCAGUGC |
| ENSG00000218891 | CCAGUGU |
| ENSG00000218891 | UCACAUU |
| ENSG00000219438 | AAAAACC |
| ENSG00000219438 | AAAACUG |
| ENSG00000219438 | AAAGUAU |
| ENSG00000219438 | AAAUGGU |
| ENSG00000219438 | ACUGUAG |
| ENSG00000219438 | AUACAAG |
| ENSG00000219438 | GGUCUAG |
| ENSG00000219438 | GUAACAG |
| ENSG00000219438 | GUUAAUG |
| ENSG00000219438 | UAUGGUU |
| ENSG00000219438 | UAUUGCU |
| ENSG00000219438 | UCUGGAG |
| ENSG00000219438 | UUCAAAU |
| ENSG00000219438 | UUGGUCC |
| ENSG00000220205 | AAAAAUC |
| ENSG00000220205 | AAAACUG |
| ENSG00000220205 | AAUUAUU |
| ENSG00000220205 | ACACACU |
| ENSG00000220205 | ACCACAG |
| ENSG00000220205 | AGGAGCU |
| ENSG00000220205 | AUAAUAC |
| ENSG00000220205 | AUAUAAC |
| ENSG00000220205 | AUGGCUU |
| ENSG00000220205 | CACAAUG |
| ENSG00000220205 | CACCACC |
| ENSG00000220205 | CAGUCCA |
| ENSG00000220205 | CUACAAA |
| ENSG00000220205 | CUAGUAG |
| ENSG00000220205 | CUCUGGG |
| ENSG00000220205 | CUGGGCA |
| ENSG00000220205 | CUGGGGG |
| ENSG00000220205 | GGAAUGU |
| ENSG00000220205 | GGAGGAG |
| ENSG00000220205 | GGGUAAG |
| ENSG00000220205 | GUCAGUU |
| ENSG00000220205 | GUGCCAC |
| ENSG00000220205 | UCACAAG |
| ENSG00000220205 | UGCAUAG |
| ENSG00000220205 | UGCAUUA |
| ENSG00000220205 | UUGGUCC |
| ENSG00000221818 | AAGUCUU |
| ENSG00000221818 | AGUAGUU |
| ENSG00000221818 | CCCUGUU |
| ENSG00000221818 | CUACAAA |
| ENSG00000221818 | UGAAAGG |
| ENSG00000221818 | UGGUACC |
| ENSG00000221823 | AAACUGU |
| ENSG00000221823 | AAAGUAA |
| ENSG00000221823 | AACACUG |
| ENSG00000221823 | AAGUGCU |
| ENSG00000221823 | ACAUUCA |
| ENSG00000221823 | ACUGUGU |
| ENSG00000221823 | AGCAAAA |
| ENSG00000221823 | AGGACAC |
| ENSG00000221823 | AUAUUAU |
| ENSG00000221823 | AUGCACC |
| ENSG00000221823 | CAAAACU |

|                 |         |
|-----------------|---------|
| ENSG00000221823 | CCUUCAU |
| ENSG00000221823 | GAAGGAA |
| ENSG00000221823 | GAGGCUG |
| ENSG00000221823 | GCAGCAU |
| ENSG00000221823 | GCUGGAU |
| ENSG00000221823 | GUAGUGU |
| ENSG00000221823 | UCAAGUA |
| ENSG00000221823 | UCACAAG |
| ENSG00000221823 | UCACACA |
| ENSG00000221823 | UCACAGG |
| ENSG00000221823 | UCACAGU |
| ENSG00000221823 | UCCAGAG |
| ENSG00000221823 | UCCUUU  |
| ENSG00000221823 | UCUUGAG |
| ENSG00000221823 | UGAUCCA |
| ENSG00000221823 | UGGAGAU |
| ENSG00000221823 | UGGGUGA |
| ENSG00000221823 | UUGACAC |
| ENSG00000221837 | GGCAGGG |
| ENSG00000221866 | AAAAGUA |
| ENSG00000221866 | AAAGGUA |
| ENSG00000221866 | AAGUAGC |
| ENSG00000221866 | AAUUUUU |
| ENSG00000221866 | ACUCAA  |
| ENSG00000221866 | AGCACCA |
| ENSG00000221866 | AGCAGCA |
| ENSG00000221866 | AGCCCUU |
| ENSG00000221866 | AGGGAGG |
| ENSG00000221866 | AUAAUAC |
| ENSG00000221866 | AUACAAG |
| ENSG00000221866 | AUAUUUU |
| ENSG00000221866 | AUGCCUU |
| ENSG00000221866 | AUGGCAC |
| ENSG00000221866 | CACUGUU |
| ENSG00000221866 | CUCUCC  |
| ENSG00000221866 | CUGCAGC |
| ENSG00000221866 | CUGCAGG |
| ENSG00000221866 | CUUUGGU |
| ENSG00000221866 | GAGCCCU |
| ENSG00000221866 | GAGGUAG |
| ENSG00000221866 | GAGGUUU |
| ENSG00000221866 | GCACCAU |
| ENSG00000221866 | GCUGGUG |
| ENSG00000221866 | GGCAAGA |
| ENSG00000221866 | GGCACGG |
| ENSG00000221866 | GGCCCUU |
| ENSG00000221866 | GUGCUUG |
| ENSG00000221866 | UACAAAG |
| ENSG00000221866 | UAGACUG |
| ENSG00000221866 | UCCUGAG |
| ENSG00000221866 | UGCAUAG |
| ENSG00000221866 | UGGUACC |
| ENSG00000221866 | UGUGCUU |
| ENSG00000221866 | UUCUGCA |
| ENSG00000221866 | UUGGUUC |
| ENSG00000221866 | UUGUGUC |
| ENSG00000221866 | UUUUUGC |
| ENSG00000221869 | AAAAAUC |
| ENSG00000221869 | AGCUGCC |
| ENSG00000221869 | CUACAAA |
| ENSG00000221869 | GAGGUAG |
| ENSG00000221869 | GAGGUUU |
| ENSG00000221870 | AACAGUC |
| ENSG00000221870 | AACCUGU |

|                 |         |
|-----------------|---------|
| ENSG00000221870 | AAGGCAC |
| ENSG00000221870 | GCAGGUU |
| ENSG00000221870 | GGUGGGC |
| ENSG00000221870 | UGAAAUG |
| ENSG00000221890 | AACAAAC |
| ENSG00000221890 | CAAAGCA |
| ENSG00000221890 | CAGCAGG |
| ENSG00000221890 | CCAGGAG |
| ENSG00000221890 | CUAGUCC |
| ENSG00000221890 | CUCUGGG |
| ENSG00000221890 | CUGGCUC |
| ENSG00000221890 | GGCUCUG |
| ENSG00000221890 | GGGGUGG |
| ENSG00000221890 | UCACAGU |
| ENSG00000221899 | ACAAGGU |
| ENSG00000221899 | GGCAAGA |
| ENSG00000221899 | UCCAGAG |
| ENSG00000221899 | UCGUGCA |
| ENSG00000221899 | UUGUUCG |
| ENSG00000221914 | AAAGUGC |
| ENSG00000221914 | AACACUG |
| ENSG00000221914 | AUGAGCU |
| ENSG00000221914 | AUGGCAC |
| ENSG00000221914 | CACCACC |
| ENSG00000221914 | CCAGGAG |
| ENSG00000221914 | CUGGAAA |
| ENSG00000221914 | GCUAGCA |
| ENSG00000221914 | GGCAAGA |
| ENSG00000221914 | GUGCUUG |
| ENSG00000221914 | UGUGCUU |
| ENSG00000221946 | CCCACCG |
| ENSG00000221949 | AGUGAUC |
| ENSG00000221949 | GGAUUUU |
| ENSG00000221968 | AAAAAUC |
| ENSG00000221978 | AAAGAGC |
| ENSG00000221978 | AAAGCGC |
| ENSG00000221978 | AAAGCUG |
| ENSG00000221978 | AAAGGUA |
| ENSG00000221978 | AACACUG |
| ENSG00000221978 | AACAUUC |
| ENSG00000221978 | AAGCGCU |
| ENSG00000221978 | AAGUCUU |
| ENSG00000221978 | ACUCAGC |
| ENSG00000221978 | AGAUAAA |
| ENSG00000221978 | AGCACCA |
| ENSG00000221978 | AGCCUGC |
| ENSG00000221978 | AGGAGCU |
| ENSG00000221978 | AGUGCAA |
| ENSG00000221978 | CAAAGCA |
| ENSG00000221978 | CACACCU |
| ENSG00000221978 | CAGCAGA |
| ENSG00000221978 | CUUGUAU |
| ENSG00000221978 | GCAACUU |
| ENSG00000221978 | GCACCAU |
| ENSG00000221978 | GCUGGUG |
| ENSG00000221978 | GGAGUCC |
| ENSG00000221978 | UCAACAG |
| ENSG00000221978 | UCACAUU |
| ENSG00000221978 | UCCUGAG |
| ENSG00000221978 | UGCAAAG |
| ENSG00000221978 | UUCUUGU |
| ENSG00000221986 | GCUUCCU |
| ENSG00000221988 | AGCAGCA |
| ENSG00000221988 | UCCUGAG |

|                 |         |
|-----------------|---------|
| ENSG00000221994 | UCCCACA |
| ENSG00000222014 | GUGCUUG |
| ENSG00000222028 | AAAGAGG |
| ENSG00000222040 | AAUCACU |
| ENSG00000222040 | ACACACC |
| ENSG00000222040 | CAAAGCA |
| ENSG00000222040 | CAGCAGA |
| ENSG00000222040 | GGAAGAC |
| ENSG00000222040 | GUAAACA |
| ENSG00000222040 | GUGAAUG |
| ENSG00000222040 | UACAAAG |
| ENSG00000222040 | UCACACA |
| ENSG00000222040 | UCACAUU |
| ENSG00000222040 | UCCAGUU |
| ENSG00000222047 | GACUUCC |
| ENSG00000223380 | AAUCUCA |
| ENSG00000223380 | AUGGCUU |
| ENSG00000223380 | CUGCCCC |
| ENSG00000223380 | GAGGCAG |
| ENSG00000223380 | GAGUCUU |
| ENSG00000223380 | GGAAUGU |
| ENSG00000223380 | GUGCAAA |
| ENSG00000223380 | UAAUACA |
| ENSG00000223380 | UUCUAAU |
| ENSG00000223501 | CAGGUGA |
| ENSG00000225190 | AAAGUGC |
| ENSG00000225190 | AAGGCAC |
| ENSG00000225190 | AAGUGCU |
| ENSG00000225190 | ACUCAGC |
| ENSG00000225190 | ACUGCAG |
| ENSG00000225190 | ACUGCAU |
| ENSG00000225190 | AGUGCUG |
| ENSG00000225190 | AUGGCUU |
| ENSG00000225190 | AUUGCAC |
| ENSG00000225190 | CAAAGUG |
| ENSG00000225190 | CUCAGGG |
| ENSG00000225190 | GAAAACA |
| ENSG00000225190 | GCUGGUG |
| ENSG00000225190 | GGAAUGU |
| ENSG00000225190 | GGCUCUG |
| ENSG00000225190 | UGCAUAG |
| ENSG00000225190 | UGCAUAU |
| ENSG00000225190 | UGCUGAC |
| ENSG00000225190 | UGGGUGA |
| ENSG00000225190 | UUGGCAA |
| ENSG00000225190 | UUGGCAC |
| ENSG00000225697 | GGAGUCC |
| ENSG00000225830 | GAGGUAU |
| ENSG00000226979 | AGGCAGG |
| ENSG00000226979 | GGAUUUU |
| ENSG00000227345 | AGCACCA |
| ENSG00000227345 | CUUUGGU |
| ENSG00000227345 | UUGGUUC |
| ENSG00000227372 | AGUGCUG |
| ENSG00000227372 | CUUUGGU |
| ENSG00000227372 | GUAACAG |
| ENSG00000227500 | AACAAAC |
| ENSG00000227500 | GAGAUGA |
| ENSG00000227802 | UAUAAAG |
| ENSG00000229117 | GUCCAGA |
| ENSG00000230989 | AAAAACC |
| ENSG00000230989 | AAAAGUA |
| ENSG00000230989 | AACCUGU |
| ENSG00000230989 | AAUCUCA |

|                 |         |
|-----------------|---------|
| ENSG00000230989 | CAAAACU |
| ENSG00000230989 | GGAUUUC |
| ENSG00000230989 | UUGGCAA |
| ENSG00000231852 | GAGAAGA |
| ENSG00000231925 | GAGCGCC |
| ENSG00000232810 | CCCCUGG |
| ENSG00000232810 | CUGGAAA |
| ENSG00000232810 | GAAAACA |
| ENSG00000232810 | GUGCAAA |
| ENSG00000233034 | CUUUGGU |
| ENSG00000233224 | AAAGAGC |
| ENSG00000233822 | AAAGAGC |
| ENSG00000234127 | ACUCAGG |
| ENSG00000234127 | GCAGCAU |
| ENSG00000234186 | UGUCUUU |
| ENSG00000234545 | AAAGUAC |
| ENSG00000234545 | AAAUUUC |
| ENSG00000234545 | AAGGCAC |
| ENSG00000234545 | ACUGUGU |
| ENSG00000234545 | CAAAGUG |
| ENSG00000234545 | UCACACA |
| ENSG00000234545 | UCACAGG |
| ENSG00000234545 | UUCAAAU |
| ENSG00000235568 | CCCACCU |
| ENSG00000235718 | UCUAGAG |
| ENSG00000236279 | AGCACCA |
| ENSG00000237190 | AUGAUGA |
| ENSG00000237190 | UAUAAAG |
| ENSG00000237190 | UCACAUU |
| ENSG00000237441 | CUGCCCC |
| ENSG00000238227 | ACCAGCA |
| ENSG00000238227 | AGCACCA |
| ENSG00000238227 | AGCAGCA |
| ENSG00000238227 | AGCAGCU |
| ENSG00000238227 | AGCCCUU |
| ENSG00000238227 | CACCAGC |
| ENSG00000238227 | GACCAUG |
| ENSG00000238227 | GCAGCAU |
| ENSG00000238227 | GCAGGUU |
| ENSG00000238227 | GGCAGUG |
| ENSG00000238227 | GUGCAAA |
| ENSG00000238227 | UAAUGCU |
| ENSG00000239264 | AAAGUAU |
| ENSG00000239264 | AAGGCAC |
| ENSG00000239264 | AUACAAG |
| ENSG00000239264 | AUGGCAC |
| ENSG00000239264 | CACAGUG |
| ENSG00000239264 | CUCAAAC |
| ENSG00000239264 | CUUCUCU |
| ENSG00000239264 | CUUUGGU |
| ENSG00000239264 | UUGGUCC |
| ENSG00000239306 | AAAUGGU |
| ENSG00000239306 | AAGGCGC |
| ENSG00000239306 | ACUUGGA |
| ENSG00000239306 | CACCACC |
| ENSG00000239306 | CUGGACU |
| ENSG00000239306 | GCAGGUU |
| ENSG00000239306 | GGACUGC |
| ENSG00000239306 | UGGACUG |
| ENSG00000239306 | UUCUAAU |
| ENSG00000239388 | UCUCAAG |
| ENSG00000239389 | AAAGAAU |
| ENSG00000239389 | AAGUGCA |
| ENSG00000239389 | AGCAGCG |

|                 |         |
|-----------------|---------|
| ENSG00000239389 | AGCAGCU |
| ENSG00000239389 | AUAAUAC |
| ENSG00000239389 | CAAAGUG |
| ENSG00000239389 | GAGGCAG |
| ENSG00000239389 | UAAUACA |
| ENSG00000239389 | UAAUAGU |
| ENSG00000239389 | UACAAAG |
| ENSG00000239389 | UAUAAUA |
| ENSG00000239389 | UCAACAG |
| ENSG00000239389 | UCACAUU |
| ENSG00000239389 | UCAUACA |
| ENSG00000239389 | UGCAUAG |
| ENSG00000239389 | UGCAUUA |
| ENSG00000239389 | UGUGCUU |
| ENSG00000239389 | UUUGCAA |
| ENSG00000239389 | UUUGCAC |
| ENSG00000239697 | CACAGGG |
| ENSG00000239704 | GCCUGGA |
| ENSG00000239779 | UGUAUGU |
| ENSG00000240021 | UUCAAGC |
| ENSG00000240065 | UACAAAG |
| ENSG00000240065 | UAUUACC |
| ENSG00000240184 | AAAACUG |
| ENSG00000240184 | CACCAGC |
| ENSG00000240184 | GGAGGCA |
| ENSG00000240184 | UGCAUAG |
| ENSG00000240184 | UGGCCAC |
| ENSG00000240224 | CUCAAAC |
| ENSG00000240224 | UCCCACC |
| ENSG00000240428 | UCCCUCU |
| ENSG00000240583 | AUGGAUU |
| ENSG00000240583 | CAGGUGA |
| ENSG00000240583 | CUGCCCC |
| ENSG00000240583 | CUUGGGC |
| ENSG00000240583 | GGUCUAG |
| ENSG00000240583 | UUGGUCC |
| ENSG00000240694 | AUGCAUU |
| ENSG00000240694 | UGCAUUG |
| ENSG00000240764 | AAAACUG |
| ENSG00000240764 | CACCAGC |
| ENSG00000240764 | GGAGGCA |
| ENSG00000240764 | UGCAUAG |
| ENSG00000240764 | UGGCCAC |
| ENSG00000240849 | ACAUUAC |
| ENSG00000240849 | AGUAGAC |
| ENSG00000240849 | AUGGCUU |
| ENSG00000240849 | GGCUCAG |
| ENSG00000240849 | GGGGUGG |
| ENSG00000240849 | GUAUUCU |
| ENSG00000240849 | UAUAAAG |
| ENSG00000240849 | UCAAGUA |
| ENSG00000240849 | UGUGUCA |
| ENSG00000240849 | UUGGCAA |
| ENSG00000240849 | UUGGCAC |
| ENSG00000241058 | CAGCUGG |
| ENSG00000241119 | CUCAAAC |
| ENSG00000241119 | UCCCACC |
| ENSG00000241322 | CCUGUAC |
| ENSG00000241322 | UCAACAG |
| ENSG00000241360 | AACACUG |
| ENSG00000241553 | AAUCACU |
| ENSG00000241553 | CUGGCUC |
| ENSG00000241553 | GCUAGCA |
| ENSG00000241553 | GGGGCAG |

|                 |          |
|-----------------|----------|
| ENSG00000241553 | UACAGUU  |
| ENSG00000241553 | UUCAAGC  |
| ENSG00000241635 | CUCAAAC  |
| ENSG00000241635 | UCCCACC  |
| ENSG00000241685 | CUUUGGU  |
| ENSG00000241697 | AAAAGUA  |
| ENSG00000241697 | AACAGUC  |
| ENSG00000241839 | AAAGUGC  |
| ENSG00000241839 | AAAUCCC  |
| ENSG00000241839 | AAGGCGC  |
| ENSG00000241839 | AAGUGCA  |
| ENSG00000241839 | CAGCUGG  |
| ENSG00000241839 | CAGGAAC  |
| ENSG00000241839 | GAGAUGA  |
| ENSG00000241839 | GCUGGUG  |
| ENSG00000241839 | GGAAUGU  |
| ENSG00000241839 | GGAGGCA  |
| ENSG00000241839 | GGCUCAG  |
| ENSG00000241839 | GUAAACA  |
| ENSG00000241839 | UAUUGCU  |
| ENSG00000241852 | AGCAGCA  |
| ENSG00000241852 | GAGGUAU  |
| ENSG00000241852 | GGAUUUC  |
| ENSG00000241852 | UCACAUU  |
| ENSG00000241878 | AAUACUG  |
| ENSG00000241878 | ACUGUGU  |
| ENSG00000241878 | ACUGUUU  |
| ENSG00000241878 | AGCAGCG  |
| ENSG00000241878 | AGCAGCU  |
| ENSG00000241878 | CUGCAGG  |
| ENSG00000241878 | GAGAAAU  |
| ENSG00000241878 | GCAGGAC  |
| ENSG00000241878 | GGCCCUG  |
| ENSG00000241878 | UACAGUU  |
| ENSG00000241878 | UCACAGG  |
| ENSG00000241878 | UCACAGU  |
| ENSG00000241878 | UUCAAAU  |
| ENSG00000241878 | UUUGCAA  |
| ENSG00000241973 | CCAGUGU  |
| ENSG00000241973 | GAUUGUC  |
| ENSG00000241978 | AAAAAUC  |
| ENSG00000241978 | AAAGCUG  |
| ENSG00000241978 | AACAUUC  |
| ENSG00000241978 | AAUACUG  |
| ENSG00000241978 | ACACACC  |
| ENSG00000241978 | ACUGCAU  |
| ENSG00000241978 | AUCCCUU  |
| ENSG00000241978 | AUGGCUU  |
| ENSG00000241978 | CAAAACU  |
| ENSG00000241978 | CACUCCU  |
| ENSG00000241978 | CAGCAAA  |
| ENSG00000241978 | CAUAUUG  |
| ENSG00000241978 | CCAUUAC  |
| ENSG00000241978 | GAGAAAU  |
| ENSG00000241978 | GCAGCAU  |
| ENSG00000241978 | GGCAGCG  |
| ENSG00000241978 | GGUCUAG  |
| ENSG00000241978 | GUGACUG  |
| ENSG00000241978 | UACAAAG  |
| ENSG00000241978 | UAGUGAG  |
| ENSG00000241978 | UCUGGAA  |
| ENSG00000241978 | UGGCUGC  |
| ENSG00000241978 | UUAGGAU  |
| ENSG00000241994 | CAA AUGC |



|                 |         |
|-----------------|---------|
| ENSG00000241994 | GCAGAAG |
| ENSG00000241994 | UGAAGUG |
| ENSG00000242028 | UAUUGCU |
| ENSG00000242108 | AAUUAAU |
| ENSG00000242108 | AAUUUUA |
| ENSG00000242108 | ACAAUUA |
| ENSG00000242108 | AGCAAAA |
| ENSG00000242108 | AGGCAGG |
| ENSG00000242108 | AUAAUAC |
| ENSG00000242108 | GCAGCAU |
| ENSG00000242108 | UCAUUUG |
| ENSG00000242265 | AAAGAAU |
| ENSG00000242265 | AGCAAAA |
| ENSG00000242265 | AGGUAGU |
| ENSG00000242265 | AUACCUC |
| ENSG00000242265 | AUCCUUG |
| ENSG00000242265 | AUGAUGA |
| ENSG00000242265 | AUGCACC |
| ENSG00000242265 | CACAGUG |
| ENSG00000242265 | CAGCAAA |
| ENSG00000242265 | CAGCAGG |
| ENSG00000242265 | CUCAAAC |
| ENSG00000242265 | CUGCAGC |
| ENSG00000242265 | CUGCUCA |
| ENSG00000242265 | CUUCACC |
| ENSG00000242265 | CUUCUCU |
| ENSG00000242265 | GAGAAGA |
| ENSG00000242265 | GAGGUAG |
| ENSG00000242265 | GAGGUAU |
| ENSG00000242265 | GAGUGUG |
| ENSG00000242265 | GCAGCAU |
| ENSG00000242265 | GCUUCCU |
| ENSG00000242265 | GGAGGCA |
| ENSG00000242265 | GGAGUGU |
| ENSG00000242265 | GGCAGUG |
| ENSG00000242265 | GGGAGCU |
| ENSG00000242265 | UAAUAGU |
| ENSG00000242265 | UCACAGG |
| ENSG00000242265 | UACCAC  |
| ENSG00000242265 | UCCAGUU |
| ENSG00000242265 | UCCCUUU |
| ENSG00000242265 | UGAAAGG |
| ENSG00000242265 | UGCAGCU |
| ENSG00000242265 | UUUGCAC |
| ENSG00000242366 | CUCAAAC |
| ENSG00000242366 | UCCCACC |
| ENSG00000242372 | GUCCAGA |
| ENSG00000242372 | UCCAGAG |
| ENSG00000242419 | AAAACUG |
| ENSG00000242419 | CACCAGC |
| ENSG00000242419 | GGAGGCA |
| ENSG00000242419 | UGCAUAG |
| ENSG00000242419 | UGGCCAC |
| ENSG00000242441 | CAGUGCA |
| ENSG00000242515 | CUCAAAC |
| ENSG00000242515 | UCCCACC |
| ENSG00000242616 | AAGGCAC |
| ENSG00000242689 | GUGAGGU |
| ENSG00000242732 | ACACACC |
| ENSG00000242732 | CUUACAG |
| ENSG00000242732 | UGAGGAC |
| ENSG00000243056 | GGUCUAG |
| ENSG00000243135 | CUCAAAC |
| ENSG00000243135 | UCCCACC |

|                 |         |
|-----------------|---------|
| ENSG00000243156 | AAAGUGC |
| ENSG00000243156 | CCAGUGC |
| ENSG00000243156 | CUAGUAA |
| ENSG00000243156 | CUUUGGU |
| ENSG00000243156 | GGAGGAG |
| ENSG00000243156 | GUGCAA  |
| ENSG00000243156 | UCAUUUG |
| ENSG00000243156 | UCCAGUU |
| ENSG00000243156 | UUCAAGC |
| ENSG00000243232 | AAAGAAU |
| ENSG00000243232 | AAGUGCA |
| ENSG00000243232 | AGCAGCG |
| ENSG00000243232 | AGCAGCU |
| ENSG00000243232 | AUAAUAC |
| ENSG00000243232 | CAAAGUG |
| ENSG00000243232 | GAGGCAG |
| ENSG00000243232 | UAAUACA |
| ENSG00000243232 | UAAUAGU |
| ENSG00000243232 | UACAAAG |
| ENSG00000243232 | UAUAAUA |
| ENSG00000243232 | UCAACAG |
| ENSG00000243232 | UCACAUU |
| ENSG00000243232 | UCAUACA |
| ENSG00000243232 | UGCAUAG |
| ENSG00000243232 | UGCAUAU |
| ENSG00000243232 | UGUGCUU |
| ENSG00000243232 | UUUGCAA |
| ENSG00000243232 | UUUGCAC |
| ENSG00000243244 | AGAUGUG |
| ENSG00000243244 | GUUAAUG |
| ENSG00000243244 | UAAGACU |
| ENSG00000243279 | GGCUCUG |
| ENSG00000243284 | AACACUG |
| ENSG00000243284 | GAGCCCC |
| ENSG00000243335 | GUAAACA |
| ENSG00000243335 | UUCUAAU |
| ENSG00000243335 | UUGGCAA |
| ENSG00000243335 | UUGGCAC |
| ENSG00000243364 | AAAAAUC |
| ENSG00000243364 | GGUUUAC |
| ENSG00000243364 | UAUAAAG |
| ENSG00000243364 | UUGGUCC |
| ENSG00000243414 | UUAGAGA |
| ENSG00000243444 | AAAGGUA |
| ENSG00000243444 | AACAGUC |
| ENSG00000243444 | AAGGCAC |
| ENSG00000243444 | AAUCACU |
| ENSG00000243444 | AAUGUUG |
| ENSG00000243444 | ACAGUAC |
| ENSG00000243444 | ACAGUAU |
| ENSG00000243444 | ACAUUAC |
| ENSG00000243444 | ACCCUGU |
| ENSG00000243444 | ACUGUUU |
| ENSG00000243444 | AGCACCA |
| ENSG00000243444 | AGCAGCU |
| ENSG00000243444 | AGGCAGG |
| ENSG00000243444 | AGUGGUU |
| ENSG00000243444 | AUGGCAC |
| ENSG00000243444 | AUUCAUU |
| ENSG00000243444 | CAAAGUG |
| ENSG00000243444 | CAAUUGC |
| ENSG00000243444 | CACAGUG |
| ENSG00000243444 | CAGACAG |
| ENSG00000243444 | CAGCAA  |

|                 |         |
|-----------------|---------|
| ENSG00000243444 | CAGGCUC |
| ENSG00000243444 | CUUUGGU |
| ENSG00000243444 | GAUUGUC |
| ENSG00000243444 | GCACCAU |
| ENSG00000243444 | GCUUCCU |
| ENSG00000243444 | GGAAGCC |
| ENSG00000243444 | GGAGGCA |
| ENSG00000243444 | GGGUGUU |
| ENSG00000243444 | GUCCAGA |
| ENSG00000243444 | GUGAGGU |
| ENSG00000243444 | GUGCUUG |
| ENSG00000243444 | UAAUACA |
| ENSG00000243444 | UAAUGCU |
| ENSG00000243444 | UCACAAG |
| ENSG00000243444 | UCACAGG |
| ENSG00000243444 | UCAUUUG |
| ENSG00000243444 | UCCCUUU |
| ENSG00000243444 | UGCAUUA |
| ENSG00000243646 | CACCAGC |
| ENSG00000243667 | AAUCUCU |
| ENSG00000243709 | AAGUGCA |
| ENSG00000243709 | AGUGCUU |
| ENSG00000243725 | AGGGAGG |
| ENSG00000243789 | GCAACUU |
| ENSG00000243943 | GAAGGAA |
| ENSG00000243943 | UAUUGCU |
| ENSG00000243978 | AACACUG |
| ENSG00000243978 | GAGAUGA |
| ENSG00000243978 | GCCUGGA |
| ENSG00000243978 | GUGCCUG |
| ENSG00000244005 | AGCAGCA |
| ENSG00000244038 | GUGCCAC |
| ENSG00000244122 | CUCAAAC |
| ENSG00000244122 | UCCCACC |
| ENSG00000244405 | ACUGUAG |
| ENSG00000244405 | AGCCCUU |
| ENSG00000244405 | AUGCAUU |
| ENSG00000244405 | CAAAACU |
| ENSG00000244405 | CAGUUAC |
| ENSG00000244405 | CCCUGUU |
| ENSG00000244405 | CUACAAA |
| ENSG00000244405 | GAGAACC |
| ENSG00000244405 | GAUUGUC |
| ENSG00000244405 | GCCUGU  |
| ENSG00000244405 | GGCAGGG |
| ENSG00000244405 | GGCCUG  |
| ENSG00000244405 | UAUAAAG |
| ENSG00000244405 | UCUGGAA |
| ENSG00000244405 | UGCCUG  |
| ENSG00000244405 | UGUCUUU |
| ENSG00000244462 | AAGGCAC |
| ENSG00000244462 | ACCUGGA |
| ENSG00000244462 | AUGCAUU |
| ENSG00000244462 | CAAGAGC |
| ENSG00000244462 | CUGGAAA |
| ENSG00000244462 | GAAAACA |
| ENSG00000244462 | GGCAAGA |
| ENSG00000244462 | UAUUGCU |
| ENSG00000244474 | CUCAAAC |
| ENSG00000244474 | UCCCACC |
| ENSG00000244486 | CAAAACU |
| ENSG00000244486 | GAGGCAG |
| ENSG00000244617 | AAUUAUU |
| ENSG00000244617 | GGGUCUU |

|                 |         |
|-----------------|---------|
| ENSG00000244687 | ACUGUGU |
| ENSG00000244687 | AGAUGUG |
| ENSG00000244687 | AGUGGUU |
| ENSG00000244687 | AUGUGCC |
| ENSG00000244687 | CACAGUG |
| ENSG00000244687 | UCACAGG |
| ENSG00000244754 | CAGGCUC |
| ENSG00000244754 | GUGAGGU |
| ENSG00000245848 | ACAGUAU |
| ENSG00000245848 | ACAUUCA |
| ENSG00000245848 | AUACAAG |
| ENSG00000245848 | AUUGCAC |
| ENSG00000245848 | GGCAAGA |
| ENSG00000245848 | UCACAUU |
| ENSG00000247596 | AAAAAUC |
| ENSG00000247596 | AGCAUUC |
| ENSG00000248383 | AAAGAAU |
| ENSG00000248383 | AAGUGCA |
| ENSG00000248383 | AGCAGCG |
| ENSG00000248383 | AGCAGCU |
| ENSG00000248383 | AUAAUAC |
| ENSG00000248383 | CAAAGUG |
| ENSG00000248383 | GAGGCAG |
| ENSG00000248383 | UAAUACA |
| ENSG00000248383 | UAAUAGU |
| ENSG00000248383 | UACAAAG |
| ENSG00000248383 | UAUAAUA |
| ENSG00000248383 | UCAACAG |
| ENSG00000248383 | UCACAUU |
| ENSG00000248383 | UCAUACA |
| ENSG00000248383 | UGCAUAG |
| ENSG00000248383 | UGCAUAU |
| ENSG00000248383 | UGUGCUU |
| ENSG00000248383 | UUUGCAA |
| ENSG00000248383 | UUUGCAC |
| ENSG00000248485 | GGAGAGA |
| ENSG00000248541 | AAAGAGC |
| ENSG00000248857 | AAAGCUG |
| ENSG00000248857 | AAGUGCU |
| ENSG00000248857 | CUUGGAG |
| ENSG00000248857 | UGCAAAG |
| ENSG00000248871 | UCCAGUU |
| ENSG00000249158 | AAAGAAU |
| ENSG00000249158 | AAGUGCA |
| ENSG00000249158 | AGCAGCG |
| ENSG00000249158 | AGCAGCU |
| ENSG00000249158 | AUAAUAC |
| ENSG00000249158 | CAAAGUG |
| ENSG00000249158 | GAGGCAG |
| ENSG00000249158 | UAAUACA |
| ENSG00000249158 | UAAUAGU |
| ENSG00000249158 | UACAAAG |
| ENSG00000249158 | UAUAAUA |
| ENSG00000249158 | UCAACAG |
| ENSG00000249158 | UCACAUU |
| ENSG00000249158 | UCAUACA |
| ENSG00000249158 | UGCAUAG |
| ENSG00000249158 | UGCAUAU |
| ENSG00000249158 | UGUGCUU |
| ENSG00000249158 | UUUGCAA |
| ENSG00000249158 | UUUGCAC |
| ENSG00000249915 | AAAAGUA |
| ENSG00000249915 | AAAGUAA |
| ENSG00000249915 | AUGGCAC |

|                 |         |
|-----------------|---------|
| ENSG0000024992  | AAAGAGC |
| ENSG0000024992  | AUGUCUG |
| ENSG0000024992  | GGAGGAG |
| ENSG0000024992  | UACAAAG |
| ENSG0000024992  | UUCUGCA |
| ENSG00000250120 | AAAGAAU |
| ENSG00000250120 | AAGUGCA |
| ENSG00000250120 | AGCAGCG |
| ENSG00000250120 | AGCAGCU |
| ENSG00000250120 | AUAAUAC |
| ENSG00000250120 | CAAAGUG |
| ENSG00000250120 | GAGGCAG |
| ENSG00000250120 | UAAUACA |
| ENSG00000250120 | UAAUAGU |
| ENSG00000250120 | UACAAAG |
| ENSG00000250120 | UAUAAUA |
| ENSG00000250120 | UCAACAG |
| ENSG00000250120 | UCACAUU |
| ENSG00000250120 | UCAUACA |
| ENSG00000250120 | UGCAUAG |
| ENSG00000250120 | UGCAUAU |
| ENSG00000250120 | UGUGCUU |
| ENSG00000250120 | UUUGCAA |
| ENSG00000250120 | UUUGCAC |
| ENSG00000250510 | AGCUGCC |
| ENSG00000250510 | GAGGCAG |
| ENSG00000250510 | GGAGGCA |
| ENSG00000251322 | AAAUUUC |
| ENSG00000251322 | ACAGGUG |
| ENSG00000251322 | ACAUAGA |
| ENSG00000251322 | ACCCUGU |
| ENSG00000251322 | AUAAUAC |
| ENSG00000251322 | CACAGUG |
| ENSG00000251322 | CAGCAA  |
| ENSG00000251322 | CAGCUGG |
| ENSG00000251322 | CCCUGG  |
| ENSG00000251322 | CCGAGCC |
| ENSG00000251322 | CGCCCUU |
| ENSG00000251322 | GAAACAU |
| ENSG00000251322 | GAGGGGC |
| ENSG00000251322 | GGAAGAC |
| ENSG00000251322 | GGCCUG  |
| ENSG00000251322 | GGGUGG  |
| ENSG00000251322 | GUCCAGA |
| ENSG00000251322 | GUGGGGA |
| ENSG00000251322 | UAUAAAG |
| ENSG00000251322 | UAUUACC |
| ENSG00000251322 | UCACAGU |
| ENSG00000251380 | AAAUGGU |
| ENSG00000251380 | AAGUGCU |
| ENSG00000251380 | ACUCAA  |
| ENSG00000251380 | UCCAGAG |
| ENSG00000251664 | AAAGAAU |
| ENSG00000251664 | AAGUGCA |
| ENSG00000251664 | AGCAGCG |
| ENSG00000251664 | AGCAGCU |
| ENSG00000251664 | AUAAUAC |
| ENSG00000251664 | CAAAGUG |
| ENSG00000251664 | GAGGCAG |
| ENSG00000251664 | UAAUACA |
| ENSG00000251664 | UAAUAGU |
| ENSG00000251664 | UACAAAG |
| ENSG00000251664 | UAUAAUA |
| ENSG00000251664 | UCAACAG |

|                 |          |
|-----------------|----------|
| ENSG00000251664 | UCACAUU  |
| ENSG00000251664 | UCAUACA  |
| ENSG00000251664 | UGCAUAG  |
| ENSG00000251664 | UGCAUAU  |
| ENSG00000251664 | UGUGCUU  |
| ENSG00000251664 | UUUGCAA  |
| ENSG00000251664 | UUUGCAC  |
| ENSG00000253148 | CAA AUGC |
| ENSG00000253148 | UUCUAAU  |
| ENSG00000253159 | AAAACUG  |
| ENSG00000253159 | CACCAGC  |
| ENSG00000253159 | GGAGGCA  |
| ENSG00000253159 | UGCAUAG  |
| ENSG00000253159 | UGGCCAC  |
| ENSG00000253293 | ACA AUUC |
| ENSG00000253293 | ACAGGUG  |
| ENSG00000253293 | ACAGUAU  |
| ENSG00000253293 | CACAGUG  |
| ENSG00000253293 | UAUAAAG  |
| ENSG00000253293 | UCACAGG  |
| ENSG00000253293 | UCAUUCG  |
| ENSG00000253293 | UGUGCUU  |
| ENSG00000253304 | AAUCUCU  |
| ENSG00000253304 | AGUAGUU  |
| ENSG00000253304 | AGUGGUU  |
| ENSG00000253304 | AUUGCAC  |
| ENSG00000253304 | CAGCAGA  |
| ENSG00000253304 | CAGUAGU  |
| ENSG00000253304 | GAAGGAA  |
| ENSG00000253304 | GGAUUUC  |
| ENSG00000253304 | GUCUUGC  |
| ENSG00000253304 | UCAAGUA  |
| ENSG00000253304 | UGCAUUG  |
| ENSG00000253304 | UUUCAAC  |
| ENSG00000253305 | AAAACUG  |
| ENSG00000253305 | CACCAGC  |
| ENSG00000253305 | GGAGGCA  |
| ENSG00000253305 | UGCAUAG  |
| ENSG00000253305 | UGGCCAC  |
| ENSG00000253313 | CCCUGAG  |
| ENSG00000253313 | UUGGCAC  |
| ENSG00000253485 | AAAACUG  |
| ENSG00000253485 | CACCAGC  |
| ENSG00000253485 | GGAGGCA  |
| ENSG00000253485 | UGCAUAG  |
| ENSG00000253485 | UGGCCAC  |
| ENSG00000253537 | AAAACUG  |
| ENSG00000253537 | CACCAGC  |
| ENSG00000253537 | GGAGGCA  |
| ENSG00000253537 | UGCAUAG  |
| ENSG00000253537 | UGGCCAC  |
| ENSG00000253731 | AAAACUG  |
| ENSG00000253731 | CACCAGC  |
| ENSG00000253731 | GGAGGCA  |
| ENSG00000253731 | UGCAUAG  |
| ENSG00000253731 | UGGCCAC  |
| ENSG00000253767 | AAAACUG  |
| ENSG00000253767 | CACCAGC  |
| ENSG00000253767 | GGAGGCA  |
| ENSG00000253767 | UGCAUAG  |
| ENSG00000253767 | UGGCCAC  |
| ENSG00000253797 | AAAACUG  |
| ENSG00000253797 | AAUCACU  |
| ENSG00000253797 | UGUCUGC  |

|                 |          |
|-----------------|----------|
| ENSG00000253797 | UGUCUGG  |
| ENSG00000253797 | UUCUUGU  |
| ENSG00000253846 | AAAACUG  |
| ENSG00000253846 | CACCAGC  |
| ENSG00000253846 | GGAGGCA  |
| ENSG00000253846 | UGCAUAG  |
| ENSG00000253846 | UGGCCAC  |
| ENSG00000253873 | AAAACUG  |
| ENSG00000253873 | CACCAGC  |
| ENSG00000253873 | GGAGGCA  |
| ENSG00000253873 | UGCAUAG  |
| ENSG00000253873 | UGGCCAC  |
| ENSG00000253910 | AAAACUG  |
| ENSG00000253910 | CACCAGC  |
| ENSG00000253910 | GGAGGCA  |
| ENSG00000253910 | UGCAUAG  |
| ENSG00000253910 | UGGCCAC  |
| ENSG00000253928 | AUAAAGU  |
| ENSG00000253928 | UAUAUGA  |
| ENSG00000253928 | UGAAAGG  |
| ENSG00000253950 | AAGUGCA  |
| ENSG00000253950 | ACAUUAC  |
| ENSG00000253950 | CACACCG  |
| ENSG00000253950 | UAUAAUA  |
| ENSG00000253950 | UGCCAGC  |
| ENSG00000253953 | AAAACUG  |
| ENSG00000253953 | CACCAGC  |
| ENSG00000253953 | GGAGGCA  |
| ENSG00000253953 | UGCAUAG  |
| ENSG00000253953 | UGGCCAC  |
| ENSG00000253958 | AGAUAAA  |
| ENSG00000253958 | UAUAAAAG |
| ENSG00000254108 | AAAGAAU  |
| ENSG00000254108 | AAGUGCA  |
| ENSG00000254108 | AGCAGCG  |
| ENSG00000254108 | AGCAGCU  |
| ENSG00000254108 | AUAAUAC  |
| ENSG00000254108 | CAAAGUG  |
| ENSG00000254108 | GAGGCAG  |
| ENSG00000254108 | UAAUACA  |
| ENSG00000254108 | UAAUAGU  |
| ENSG00000254108 | UACAAAG  |
| ENSG00000254108 | UAUAAUA  |
| ENSG00000254108 | UCAACAG  |
| ENSG00000254108 | UCACAUU  |
| ENSG00000254108 | UCAUACA  |
| ENSG00000254108 | UGCAUAG  |
| ENSG00000254108 | UGCAUAU  |
| ENSG00000254108 | UGUGCUU  |
| ENSG00000254108 | UUUGCAA  |
| ENSG00000254108 | UUUGCAC  |
| ENSG00000254122 | AAAACUG  |
| ENSG00000254122 | CACCAGC  |
| ENSG00000254122 | GGAGGCA  |
| ENSG00000254122 | UGCAUAG  |
| ENSG00000254122 | UGGCCAC  |
| ENSG00000254147 | ACCAGCA  |
| ENSG00000254147 | CCUGCUG  |
| ENSG00000254147 | GGCUCAG  |
| ENSG00000254147 | UAAUAUC  |
| ENSG00000254221 | AAAACUG  |
| ENSG00000254221 | CACCAGC  |
| ENSG00000254221 | GGAGGCA  |
| ENSG00000254221 | UGCAUAG  |

|                 |         |
|-----------------|---------|
| ENSG00000254221 | UGGCCAC |
| ENSG00000254245 | AAAACUG |
| ENSG00000254245 | CACCAGC |
| ENSG00000254245 | GGAGGCA |
| ENSG00000254245 | UGCAUAG |
| ENSG00000254245 | UGGCCAC |

---
