# Supplementary material for: Insights into the regulation of human CNV-miRNAs from the view of their target genes
Source: PubMed Central journal article supplement (PMC3582595; doi:10.1186/1471-2164-13-707), 2012-12-18
Supplement: 1471-2164-13-707-S2.pdf [file 1471-2164-13-707-S2.pdf]

| <b>miRNA Family ID</b> | <b>miRNA</b>                       |
|------------------------|------------------------------------|
| <b>GCUGGUG</b>         | <i>hsa-miR-138;</i>                |
| <b>CAGUCCA</b>         | <i>hsa-miR-455-3p;</i>             |
| <b>GGACGGA</b>         | <i>hsa-miR-184;</i>                |
| <b>GUAUUCU</b>         | <i>hsa-miR-630;</i>                |
| <b>UCACAUU</b>         | <i>hsa-miR-23a;</i>                |
| <b>CUCCCAA</b>         | <i>hsa-miR-150;</i>                |
| <b>CUGGCUC</b>         | <i>hsa-miR-149;</i>                |
| <b>UCCCUUU</b>         | <i>hsa-miR-211;</i>                |
| <b>UUGGUCC</b>         | <i>hsa-miR-133a;</i>               |
| <b>AGAUAAA</b>         | <i>hsa-miR-577;</i>                |
| <b>AUUGCAC</b>         | <i>hsa-miR-25; hsa-miR-92b;</i>    |
| <b>CACAGUG</b>         | <i>hsa-miR-128;</i>                |
| <b>CGUUUGC</b>         | <i>hsa-miR-1282;</i>               |
| <b>UUGGCAA</b>         | <i>hsa-miR-182;</i>                |
| <b>CCAGUGC</b>         | <i>hsa-miR-1825;</i>               |
| <b>ACAUUCA</b>         | <i>hsa-miR-181c; hsa-miR-181d;</i> |
| <b>GCAGGAC</b>         | <i>hsa-miR-1286;</i>               |
| <b>UGCAUUAU</b>        | <i>hsa-miR-448;</i>                |
| <b>AAUCUCU</b>         | <i>hsa-miR-216b;</i>               |
| <b>UCAACGG</b>         | <i>hsa-miR-95;</i>                 |
| <b>CGUGGCC</b>         | <i>hsa-miR-1204;</i>               |
| <b>ACAAUAU</b>         | <i>hsa-miR-338-5p;</i>             |
| <b>GGGGUCC</b>         | <i>hsa-miR-615-5p;</i>             |
| <b>UGCAGCU</b>         | <i>hsa-miR-1301;</i>               |
| <b>GGAUGAG</b>         | <i>hsa-miR-1255b;</i>              |
| <b>UAAGACU</b>         | <i>hsa-miR-499-5p;</i>             |
| <b>AGGUAGU</b>         | <i>hsa-miR-196a;</i>               |
| <b>UCUCACC</b>         | <i>hsa-miR-1229;</i>               |
| <b>CCUUCUU</b>         | <i>hsa-miR-1248;</i>               |
| <b>GCCUGGG</b>         | <i>hsa-miR-661;</i>                |
| <b>AGCCCUU</b>         | <i>hsa-miR-129-3p;</i>             |
| <b>UGGGACA</b>         | <i>hsa-miR-1302;</i>               |
| <b>CAGCAGA</b>         | <i>hsa-miR-922;</i>                |
| <b>GAGAAGA</b>         | <i>hsa-miR-1253;</i>               |
| <b>GGCAGUG</b>         | <i>hsa-miR-34a;</i>                |
| <b>ACCACAG</b>         | <i>hsa-miR-140-3p;</i>             |
| <b>AACCUGU</b>         | <i>hsa-miR-649;</i>                |
| <b>GGAGGCA</b>         | <i>hsa-miR-650;</i>                |
| <b>CCAGUGU</b>         | <i>hsa-miR-199a-5p;</i>            |
| <b>CUCUCC</b>          | <i>hsa-miR-1236;</i>               |
| <b>AAGGCAC</b>         | <i>hsa-miR-124; hsa-miR-506;</i>   |
| <b>GGGUAAG</b>         | <i>hsa-miR-555;</i>                |
| <b>AGUGGUU</b>         | <i>hsa-miR-140-5p;</i>             |
| <b>CUGGGCA</b>         | <i>hsa-miR-612;</i>                |
| <b>CCCUGAG</b>         | <i>hsa-miR-125a-5p;</i>            |
| <b>UGUCUUU</b>         | <i>hsa-miR-511;</i>                |
| <b>GAUUGUA</b>         | <i>hsa-miR-508-3p;</i>             |

**GGCUGCG**  
**CACAGGG**  
**GGGUCGG**  
**ACUGCAG**  
**UCAUUCG**  
**CCCACCU**  
**AAUACUG**  
**UCACAAG**  
**GGCGCCU**  
**AGUAGUU**  
**AAGUCUU**  
**UUAGGAU**  
**ACUGUAG**  
**UUGUGUC**  
**AGGAUGU**  
**UGGCUGC**  
**ACUCAGC**  
**CGUACCG**  
**CCGAGCC**  
**GGGAUCG**  
**AUGGCUU**  
**UUUUUGC**  
**UGAAAUG**  
**AAGACAU**  
**CAGACAG**  
**AUGGCAC**  
**GCCUGGA**

*hsa-miR-604;*  
*hsa-miR-220c;*  
*hsa-miR-886-5p;*  
*hsa-miR-509-5p;*  
*hsa-miR-1298;*  
*hsa-miR-1224-3p;*  
*hsa-miR-200b; hsa-miR-429;*  
*hsa-miR-513b;*  
*hsa-miR-566;*  
*hsa-miR-1244;*  
*hsa-miR-1264;*  
*hsa-miR-651;*  
*hsa-miR-1183;*  
*hsa-miR-599;*  
*hsa-miR-1265;*  
*hsa-miR-647;*  
*hsa-miR-512-5p;*  
*hsa-miR-126;*  
*hsa-miR-615-3p;*  
*hsa-miR-638;*  
*hsa-miR-135a;*  
*hsa-miR-129-5p;*  
*hsa-miR-203;*  
*hsa-miR-641;*  
*hsa-miR-1324;*  
*hsa-miR-183;*  
*hsa-miR-1254;*

**GAGGUAG**

*hsa-let-7a; hsa-let-7b; hsa-let-7d; hsa-let-7e; hsa-let-7f; hsa-let-7g; hsa-let-7i; hsa-miR-98;*

**GUGGCCC**  
**GCAGGUU**  
**ACCUGGA**  
**UGGGUAC**  
**GUCAUUG**  
**CAGUUAC**  
**CGUUGGC**  
**AGGCAGG**  
**GGGGUGG**  
**ACUCCAG**  
**UCAAGUA**  
**CUCUAGC**  
**ACUCAGG**  
**CAGUAGU**  
**UGUGCGU**  
**GUGAAUG**  
**CCAGUAC**  
**GUGCCAC**  
**GGAGAGA**

*hsa-miR-663b;*  
*hsa-miR-657;*  
*hsa-miR-619;*  
*hsa-miR-1225-5p;*  
*hsa-miR-616;*  
*hsa-miR-935;*  
*hsa-miR-1306;*  
*hsa-miR-940;*  
*hsa-miR-608;*  
*hsa-miR-508-5p;*  
*hsa-miR-26a;*  
*hsa-miR-1251;*  
*hsa-miR-510;*  
*hsa-miR-199a-3p;*  
*hsa-miR-210;*  
*hsa-miR-1257;*  
*hsa-miR-770-5p;*  
*hsa-miR-1227;*  
*hsa-miR-185;*

|         |                                                                   |
|---------|-------------------------------------------------------------------|
| UCUCAAG | <i>hsa-miR-513c;</i>                                              |
| CCAGCAU | <i>hsa-miR-338-3p;</i>                                            |
| UAUUACC | <i>hsa-miR-556-3p;</i>                                            |
| GGAAGAC | <i>hsa-miR-7;</i>                                                 |
| GCGGAGG | <i>hsa-miR-658;</i>                                               |
| ACAAGGU | <i>hsa-miR-624;</i>                                               |
| UCACAGU | <i>hsa-miR-27a;</i>                                               |
| UCACAGG | <i>hsa-miR-513a-5p;</i>                                           |
| GGCGGGG | <i>hsa-miR-663;</i>                                               |
| UUUGCAC | <i>hsa-miR-507; hsa-miR-557;</i>                                  |
| UGGUACC | <i>hsa-miR-1263;</i>                                              |
| AGCUGCC | <i>hsa-miR-22;</i>                                                |
| GGGCGUG | <i>hsa-miR-1268;</i>                                              |
| GCCCUUA | <i>hsa-miR-938;</i>                                               |
| AAAGUAA | <i>hsa-miR-548d-5p; hsa-miR-548h; hsa-miR-548i; hsa-miR-548j;</i> |
| GAAAACA | <i>hsa-miR-570;</i>                                               |
| CGACCCA | <i>hsa-miR-551a;</i>                                              |
| UGGAGAU | <i>hsa-miR-1270; hsa-miR-620;</i>                                 |
| GUAGUGU | <i>hsa-miR-142-3p;</i>                                            |
| GGCAAGA | <i>hsa-miR-31;</i>                                                |
| AUGUGCC | <i>hsa-miR-455-5p;</i>                                            |
| GAGCUGC | <i>hsa-miR-558;</i>                                               |
| AAAGAGG | <i>hsa-miR-583;</i>                                               |
| AUACCUC | <i>hsa-miR-875-5p;</i>                                            |
| CUGCAGC | <i>hsa-miR-1184;</i>                                              |
| UUGGUUC | <i>hsa-miR-659;</i>                                               |
| AACUACU | <i>hsa-miR-606;</i>                                               |
| GAGCCCC | <i>hsa-miR-1225-3p;</i>                                           |
| AGCCUGC | <i>hsa-miR-596;</i>                                               |
| GCGGGUG | <i>hsa-miR-886-3p;</i>                                            |
| GGUGCGG | <i>hsa-miR-675;</i>                                               |
| UCAUUUG | <i>hsa-miR-579;</i>                                               |
| UUGAUCA | <i>hsa-miR-1826;</i>                                              |
| CGGCCUG | <i>hsa-miR-1234;</i>                                              |
| ACCCGUA | <i>hsa-miR-99b;</i>                                               |
| UCCGGC  | <i>hsa-miR-1180;</i>                                              |
| AUGAGCU | <i>hsa-miR-556-5p;</i>                                            |
| GAGUUGG | <i>hsa-miR-571;</i>                                               |
| AAAUUUC | <i>hsa-miR-513a-3p;</i>                                           |
| GCUGGAU | <i>hsa-miR-1287;</i>                                              |
| ACCCUGU | <i>hsa-miR-10a;</i>                                               |
| ACUGCAU | <i>hsa-miR-217;</i>                                               |
| GGACCUG | <i>hsa-miR-492;</i>                                               |
| AGUGCUG | <i>hsa-miR-512-3p;</i>                                            |
| CAAAACU | <i>hsa-miR-548o;</i>                                              |
| AAAGUGC | <i>hsa-miR-106b; hsa-miR-93;</i>                                  |
| UGUGCUU | <i>hsa-miR-218;</i>                                               |
| GAUCAGA | <i>hsa-miR-383;</i>                                               |

|                |                                                  |
|----------------|--------------------------------------------------|
| <b>GAGAACC</b> | <i>hsa-miR-589;</i>                              |
| <b>CGGUGCU</b> | <i>hsa-miR-1250;</i>                             |
| <b>AGUGCAA</b> | <i>hsa-miR-130a; hsa-miR-301a; hsa-miR-454;</i>  |
| <b>GAGGUAU</b> | <i>hsa-miR-202;</i>                              |
| <b>GGGGAGC</b> | <i>hsa-miR-939;</i>                              |
| <b>CAGUCUG</b> | <i>hsa-miR-622;</i>                              |
| <b>AAUCUCA</b> | <i>hsa-miR-216a;</i>                             |
| <b>CGCCCUU</b> | <i>hsa-miR-1249;</i>                             |
| <b>ACCCGGC</b> | <i>hsa-miR-941;</i>                              |
| <b>UUGGCAC</b> | <i>hsa-miR-96;</i>                               |
| <b>GGCUCAG</b> | <i>hsa-miR-24;</i>                               |
| <b>CUGGAAA</b> | <i>hsa-miR-875-3p;</i>                           |
| <b>AACACUG</b> | <i>hsa-miR-200a;</i>                             |
| <b>UGAGGAC</b> | <i>hsa-miR-1224-5p;</i>                          |
| <b>AAAACUG</b> | <i>hsa-miR-548f;</i>                             |
| <b>UGAGUCU</b> | <i>hsa-miR-627;</i>                              |
| <b>UGCAUAG</b> | <i>hsa-miR-153;</i>                              |
| <b>AUAAAGU</b> | <i>hsa-miR-142-5p;</i>                           |
| <b>AAAGCUG</b> | <i>hsa-miR-320a; hsa-miR-320b; hsa-miR-320d;</i> |
| <b>ACAUCAC</b> | <i>hsa-miR-499-3p;</i>                           |
| <b>GAUUGGU</b> | <i>hsa-miR-509-3p;</i>                           |
| <b>UUGACAC</b> | <i>hsa-miR-514;</i>                              |
| <b>GGAAUGU</b> | <i>hsa-miR-1;</i>                                |
| <b>CCCACGU</b> | <i>hsa-miR-662;</i>                              |
| <b>UCUGGAA</b> | <i>hsa-miR-1299;</i>                             |
| <b>CCCACCG</b> | <i>hsa-miR-1280;</i>                             |
| <b>UUCCUAG</b> | <i>hsa-miR-384;</i>                              |
| <b>CAGGCUC</b> | <i>hsa-miR-484;</i>                              |
| <b>GAGCCCU</b> | <i>hsa-miR-1233;</i>                             |
| <b>CAGGUGA</b> | <i>hsa-miR-125a-3p;</i>                          |

---
