# Supplementary material for: Insights into the regulation of human CNV-miRNAs from the view of their target genes
Source: PubMed Central journal article supplement (PMC3582595; doi:10.1186/1471-2164-13-707), 2012-12-18
Supplement: 1471-2164-13-707-S4.pdf [file 1471-2164-13-707-S4.pdf]

| <b>Ensembl Gene ID</b> | <b>CV in YRI</b> | <b>CV in CEU</b> | <b>CV in CHB</b> | <b>CV in JPT</b> |
|------------------------|------------------|------------------|------------------|------------------|
| ENSG00000127720        | 0.039466239      | 0.039092832      | 0.03300057       | 0.035316145      |
| ENSG00000109819        | 0.028701726      | 0.025725772      | 0.025247146      | 0.025925952      |
| ENSG00000161057        | 0.021643122      | 0.027666774      | 0.026906086      | 0.026938763      |
| ENSG00000237787        | 0.014669792      | 0.024676023      | 0.024522119      | 0.015752464      |
| ENSG00000051596        | 0.048830556      | 0.037215416      | 0.037659393      | 0.035402659      |
| ENSG00000172244        | 0.039442334      | 0.042517218      | 0.031144247      | 0.030413094      |
| ENSG00000182511        | 0.048378495      | 0.050503897      | 0.056066256      | 0.048065326      |
| ENSG00000100796        | 0.015641039      | 0.025521288      | 0.025380635      | 0.015151878      |
| ENSG00000135541        | 0.035027212      | 0.040353311      | 0.033084856      | 0.0331495        |
| ENSG00000143376        | 0.034273641      | 0.041679729      | 0.035684194      | 0.026831788      |
| ENSG00000165240        | 0.035009162      | 0.038441215      | 0.031838486      | 0.035109638      |
| ENSG00000120853        | 0.016414995      | 0.025336277      | 0.025030259      | 0.015952448      |
| ENSG00000180739        | 0.016031752      | 0.025104646      | 0.024430713      | 0.015267624      |
| ENSG00000172172        | 0.027703771      | 0.030692062      | 0.028981341      | 0.023712781      |
| ENSG00000172020        | 0.091461122      | 0.066614445      | 0.033272598      | 0.040482513      |
| ENSG00000100218        | 0.024146741      | 0.027552035      | 0.025843513      | 0.024115346      |
| ENSG00000029639        | 0.038675005      | 0.036747937      | 0.035843206      | 0.03277403       |
| ENSG00000132604        | 0.026124052      | 0.034190371      | 0.029156799      | 0.024053984      |
| ENSG00000111218        | 0.014966223      | 0.025430698      | 0.025451699      | 0.015647152      |
| ENSG00000142185        | 0.017311823      | 0.026644012      | 0.025570314      | 0.017983217      |
| ENSG00000162676        | 0.064259592      | 0.045997887      | 0.052618582      | 0.044429683      |
| ENSG00000131724        | 0.104308819      | 0.106366054      | 0.048931752      | 0.074294809      |
| ENSG00000213417        | 0.017683838      | 0.025330408      | 0.025657138      | 0.017221358      |
| ENSG00000101194        | 0.032625569      | 0.031790866      | 0.031690121      | 0.027916704      |
| ENSG00000149483        | 0.046475079      | 0.037837665      | 0.041341746      | 0.039176966      |
| ENSG00000112812        | 0.054007245      | 0.045388894      | 0.040567174      | 0.043535054      |
| ENSG00000005884        | 0.018022031      | 0.026483557      | 0.025475909      | 0.017427774      |
| ENSG00000128595        | 0.030608438      | 0.033473019      | 0.036372331      | 0.032182175      |
| ENSG00000136531        | 0.021429785      | 0.026808071      | 0.025286133      | 0.017375345      |
| ENSG00000100211        | 0.037961311      | 0.044050213      | 0.051844912      | 0.040735287      |
| ENSG00000183617        | 0.032537436      | 0.034951333      | 0.034886777      | 0.030440223      |
| ENSG00000175220        | 0.030247616      | 0.035058367      | 0.031435432      | 0.033291036      |
| ENSG00000156282        | 0.014620332      | 0.025504744      | 0.024064327      | 0.01452672       |
| ENSG00000186479        | 0.013772709      | 0.023819527      | 0.023912648      | 0.013868162      |
| ENSG00000112981        | 0.031432028      | 0.033335973      | 0.027874745      | 0.025647969      |
| ENSG00000168283        | 0.033920682      | 0.044744559      | 0.039004927      | 0.030984621      |
| ENSG00000204165        | 0.05896926       | 0.037101286      | 0.036231119      | 0.043511691      |
| ENSG00000034510        | 0.01901018       | 0.024943298      | 0.025732529      | 0.017050132      |
| ENSG00000187608        | 0.04343567       | 0.043842146      | 0.039509875      | 0.038629871      |
| ENSG00000100652        | 0.01511544       | 0.025043679      | 0.024021672      | 0.016342473      |
| ENSG00000167536        | 0.061097257      | 0.051940171      | 0.044355776      | 0.050632535      |
| ENSG00000145103        | 0.050634062      | 0.044809553      | 0.043693434      | 0.039561961      |
| ENSG00000131652        | 0.036588086      | 0.033637507      | 0.035044653      | 0.029107271      |
| ENSG00000102805        | 0.029729285      | 0.034801485      | 0.034093603      | 0.029573071      |
| ENSG00000107185        | 0.016646062      | 0.02592485       | 0.025509873      | 0.015589633      |
| ENSG00000119314        | 0.032868947      | 0.037297572      | 0.036865814      | 0.026059832      |
| ENSG00000159259        | 0.041257229      | 0.037205427      | 0.036559292      | 0.029695166      |
| ENSG00000196652        | 0.016910538      | 0.025501239      | 0.025549531      | 0.017210014      |
| ENSG00000100568        | 0.025347053      | 0.03130486       | 0.033060354      | 0.027211497      |
| ENSG00000008283        | 0.034006451      | 0.036562016      | 0.03621847       | 0.028129983      |
| ENSG00000108468        | 0.032308152      | 0.036794706      | 0.033629081      | 0.032823238      |

|                 |             |             |             |             |
|-----------------|-------------|-------------|-------------|-------------|
| ENSG00000176566 | 0.016668496 | 0.025745947 | 0.02467226  | 0.014842794 |
| ENSG00000158109 | 0.030930442 | 0.036428438 | 0.034151272 | 0.029253692 |
| ENSG00000088970 | 0.042246013 | 0.041316017 | 0.036980894 | 0.031912229 |
| ENSG00000169313 | 0.018149737 | 0.025639219 | 0.024894773 | 0.015504274 |
| ENSG00000136044 | 0.028832057 | 0.033644085 | 0.031757476 | 0.028988703 |
| ENSG00000163898 | 0.029065443 | 0.031332111 | 0.033422426 | 0.025840946 |
| ENSG00000102057 | 0.027147842 | 0.030495158 | 0.027401179 | 0.023684604 |
| ENSG00000189132 | 0.018341332 | 0.025729657 | 0.025952775 | 0.017447232 |
| ENSG00000130349 | 0.033262335 | 0.035516179 | 0.030112125 | 0.024468795 |
| ENSG00000113163 | 0.0357667   | 0.033425287 | 0.032241842 | 0.02880923  |
| ENSG00000141968 | 0.02878118  | 0.031948768 | 0.031055562 | 0.026327145 |
| ENSG00000182333 | 0.016123559 | 0.025569481 | 0.025141848 | 0.016188039 |
| ENSG00000179776 | 0.017459664 | 0.026544396 | 0.026638798 | 0.015376307 |
| ENSG00000155760 | 0.071120798 | 0.061028161 | 0.026515603 | 0.024041587 |
| ENSG00000125266 | 0.083567094 | 0.066883578 | 0.048414756 | 0.058673842 |
| ENSG00000132669 | 0.085055173 | 0.049050703 | 0.029919867 | 0.034114967 |
| ENSG00000184220 | 0.037113856 | 0.038749377 | 0.035112581 | 0.028136141 |
| ENSG00000107404 | 0.018630604 | 0.026065005 | 0.025555988 | 0.01740607  |
| ENSG00000105829 | 0.032985579 | 0.037333696 | 0.03261776  | 0.030500927 |
| ENSG00000244537 | 0.016029823 | 0.025674106 | 0.025606896 | 0.015713672 |
| ENSG00000169026 | 0.056148558 | 0.053665551 | 0.044660003 | 0.059638467 |
| ENSG00000131238 | 0.025542992 | 0.030279235 | 0.028400417 | 0.025747219 |
| ENSG00000139211 | 0.016011932 | 0.025201156 | 0.025531213 | 0.017046866 |
| ENSG00000196220 | 0.036099556 | 0.039217143 | 0.032716134 | 0.037659778 |
| ENSG00000178804 | 0.01544479  | 0.024739042 | 0.024507982 | 0.015231929 |
| ENSG00000088451 | 0.02989545  | 0.032820865 | 0.033641106 | 0.024200728 |
| ENSG00000156049 | 0.016050356 | 0.024104211 | 0.025002067 | 0.015048459 |
| ENSG00000099330 | 0.031886287 | 0.029001257 | 0.031273818 | 0.028732763 |
| ENSG00000221855 | 0.014962168 | 0.025574573 | 0.025537335 | 0.015191534 |
| ENSG00000155792 | 0.033913126 | 0.037385754 | 0.029411869 | 0.026895111 |
| ENSG00000178567 | 0.03573633  | 0.03643392  | 0.034884052 | 0.03169986  |
| ENSG00000131153 | 0.080064809 | 0.061061021 | 0.059754003 | 0.067556257 |
| ENSG00000101146 | 0.02691619  | 0.030647577 | 0.033022517 | 0.025503233 |
| ENSG00000221834 | 0.016768097 | 0.025346406 | 0.027340916 | 0.018321687 |
| ENSG00000164330 | 0.054809427 | 0.050412743 | 0.042561971 | 0.045886592 |
| ENSG00000105053 | 0.023345991 | 0.03396513  | 0.031977922 | 0.024859192 |
| ENSG00000160285 | 0.033462551 | 0.042226889 | 0.035869632 | 0.035182939 |
| ENSG00000121671 | 0.022675745 | 0.029498781 | 0.034759711 | 0.023531942 |
| ENSG00000154822 | 0.054526643 | 0.039006983 | 0.040171354 | 0.043970464 |
| ENSG00000131686 | 0.01810588  | 0.026298508 | 0.026659761 | 0.020360307 |
| ENSG00000183840 | 0.015368686 | 0.025531936 | 0.025641238 | 0.015831733 |
| ENSG00000100577 | 0.024929267 | 0.02854222  | 0.033181651 | 0.021862982 |
| ENSG00000136026 | 0.071573233 | 0.039068956 | 0.04557701  | 0.061284812 |
| ENSG00000133665 | 0.016867032 | 0.025369529 | 0.0247198   | 0.016301346 |
| ENSG00000243649 | 0.019955079 | 0.028772929 | 0.025210252 | 0.018787371 |
| ENSG00000078114 | 0.026516014 | 0.025446466 | 0.025762264 | 0.017667495 |
| ENSG00000169291 | 0.020586036 | 0.02715692  | 0.024590365 | 0.023238425 |
| ENSG00000177045 | 0.034265538 | 0.035265848 | 0.036308243 | 0.036762269 |
| ENSG00000181852 | 0.028026286 | 0.033966029 | 0.036044231 | 0.025385071 |
| ENSG00000167553 | 0.032517495 | 0.032474271 | 0.031914615 | 0.029560567 |
| ENSG00000165905 | 0.044404894 | 0.037384834 | 0.034354184 | 0.044289638 |
| ENSG00000132139 | 0.015691942 | 0.025454561 | 0.024999631 | 0.016226916 |
| ENSG00000181938 | 0.044839133 | 0.037662195 | 0.043308328 | 0.042467267 |
| ENSG00000082258 | 0.02642285  | 0.026918835 | 0.026488599 | 0.023920198 |

|                 |             |             |             |             |
|-----------------|-------------|-------------|-------------|-------------|
| ENSG00000116062 | 0.034554997 | 0.035692469 | 0.031015546 | 0.027277446 |
| ENSG00000076344 | 0.016215263 | 0.025153198 | 0.024955538 | 0.016717196 |
| ENSG00000142279 | 0.016618426 | 0.026254247 | 0.026952359 | 0.01603654  |
| ENSG00000008710 | 0.023819369 | 0.029200998 | 0.032268739 | 0.028125042 |
| ENSG00000170632 | 0.031010528 | 0.035487502 | 0.030074029 | 0.029673041 |
| ENSG00000186577 | 0.028744227 | 0.034148514 | 0.032289829 | 0.026204212 |
| ENSG00000197943 | 0.032653992 | 0.034211295 | 0.034928342 | 0.035694989 |
| ENSG00000082556 | 0.015993472 | 0.025521259 | 0.025331758 | 0.016266499 |
| ENSG00000154222 | 0.023857471 | 0.035117272 | 0.033383428 | 0.033464731 |
| ENSG00000213341 | 0.033028731 | 0.038878371 | 0.033268424 | 0.037630832 |
| ENSG00000184156 | 0.015954788 | 0.02546455  | 0.025301064 | 0.014241604 |
| ENSG00000047315 | 0.024647696 | 0.031474829 | 0.030867631 | 0.022922483 |
| ENSG00000171824 | 0.028562023 | 0.03496767  | 0.029923296 | 0.024431936 |
| ENSG00000051341 | 0.029914345 | 0.031714333 | 0.042778899 | 0.025767556 |
| ENSG00000126785 | 0.016761828 | 0.025780779 | 0.025706028 | 0.015376975 |
| ENSG00000143217 | 0.021817333 | 0.02442412  | 0.025374115 | 0.015251383 |
| ENSG00000106714 | 0.016873884 | 0.024852613 | 0.024979265 | 0.014478518 |
| ENSG00000115159 | 0.047448598 | 0.048694868 | 0.041135762 | 0.039009699 |
| ENSG00000162636 | 0.017198525 | 0.025164431 | 0.024860262 | 0.016295337 |
| ENSG00000044115 | 0.03368339  | 0.038450634 | 0.031081326 | 0.029287229 |
| ENSG00000088766 | 0.032045175 | 0.033170019 | 0.030497518 | 0.022261413 |
| ENSG00000130700 | 0.015349218 | 0.025020655 | 0.025978776 | 0.015644959 |
| ENSG00000100196 | 0.052919127 | 0.047799481 | 0.055791487 | 0.061256392 |
| ENSG00000143921 | 0.014884522 | 0.025221017 | 0.024776767 | 0.014183699 |
| ENSG00000114480 | 0.049980778 | 0.052469171 | 0.037829955 | 0.049137323 |
| ENSG00000110987 | 0.057501699 | 0.052700864 | 0.046546642 | 0.045021395 |
| ENSG00000198211 | 0.08174089  | 0.073286493 | 0.043981658 | 0.065560169 |
| ENSG00000143457 | 0.031067215 | 0.038684382 | 0.036449627 | 0.031195378 |
| ENSG00000130270 | 0.016630806 | 0.025211157 | 0.024929034 | 0.017226858 |
| ENSG00000132612 | 0.02136346  | 0.030118477 | 0.035945737 | 0.02205853  |
| ENSG00000185269 | 0.019483616 | 0.02912673  | 0.026334865 | 0.024145317 |
| ENSG00000163481 | 0.02266052  | 0.033246055 | 0.037309061 | 0.025980402 |
| ENSG00000132185 | 0.041381051 | 0.039405637 | 0.0423939   | 0.059287748 |
| ENSG00000214226 | 0.020074749 | 0.028452971 | 0.025952935 | 0.019119632 |
| ENSG00000170214 | 0.014704145 | 0.024849454 | 0.025332937 | 0.014589973 |
| ENSG00000145868 | 0.018428518 | 0.027202556 | 0.024975785 | 0.017100536 |
| ENSG00000070669 | 0.016952394 | 0.024499044 | 0.024968277 | 0.016139362 |
| ENSG00000125633 | 0.018674795 | 0.026479339 | 0.02542063  | 0.018020928 |
| ENSG00000178585 | 0.036212374 | 0.033739731 | 0.035595101 | 0.034542477 |
| ENSG00000182359 | 0.038477043 | 0.039121651 | 0.034931431 | 0.036247224 |
| ENSG00000162931 | 0.016185903 | 0.025856043 | 0.027262946 | 0.016978057 |
| ENSG00000164483 | 0.015193414 | 0.026026571 | 0.025169845 | 0.01693734  |
| ENSG00000077312 | 0.027942698 | 0.027444916 | 0.027865074 | 0.022960283 |
| ENSG00000196169 | 0.017241526 | 0.025457375 | 0.02525219  | 0.015512844 |
| ENSG00000145022 | 0.032343401 | 0.030498408 | 0.033436685 | 0.02896974  |
| ENSG00000132275 | 0.028784429 | 0.032856116 | 0.035992537 | 0.022844229 |
| ENSG00000179841 | 0.017919346 | 0.025297117 | 0.024965822 | 0.016369922 |
| ENSG00000204160 | 0.028148763 | 0.031564758 | 0.033520875 | 0.028865319 |
| ENSG00000115310 | 0.01420456  | 0.024709264 | 0.025472602 | 0.015614865 |
| ENSG00000119669 | 0.056218331 | 0.047286528 | 0.044686393 | 0.045794144 |
| ENSG00000170876 | 0.027033139 | 0.030910587 | 0.029401647 | 0.020477881 |
| ENSG00000186063 | 0.040507908 | 0.052836806 | 0.038998216 | 0.043568315 |
| ENSG00000171840 | 0.07266543  | 0.047332787 | 0.050597308 | 0.045582279 |
| ENSG00000180376 | 0.036059411 | 0.040801561 | 0.036021872 | 0.029887823 |

|                 |             |             |             |             |
|-----------------|-------------|-------------|-------------|-------------|
| ENSG0000010319  | 0.015441711 | 0.024650107 | 0.024838365 | 0.015125556 |
| ENSG00000074356 | 0.032593983 | 0.035092807 | 0.031711147 | 0.025135104 |
| ENSG00000241484 | 0.015235797 | 0.025449612 | 0.024718105 | 0.016300132 |
| ENSG00000145861 | 0.015979814 | 0.023707718 | 0.025385514 | 0.015121654 |
| ENSG00000007384 | 0.048067884 | 0.039941899 | 0.039016703 | 0.027948322 |
| ENSG00000242515 | 0.016627193 | 0.025948346 | 0.025925015 | 0.015531129 |
| ENSG00000102595 | 0.050244426 | 0.050241838 | 0.038830808 | 0.039953615 |
| ENSG00000101336 | 0.130785096 | 0.094340074 | 0.105813249 | 0.117850408 |
| ENSG00000129559 | 0.020038811 | 0.02675768  | 0.026315654 | 0.016796111 |
| ENSG00000144026 | 0.029975645 | 0.034580549 | 0.034039278 | 0.025632255 |
| ENSG00000186051 | 0.016599235 | 0.025058243 | 0.025058109 | 0.015661358 |
| ENSG00000175518 | 0.01968924  | 0.027264622 | 0.027714473 | 0.022205487 |
| ENSG00000137501 | 0.017293062 | 0.025197534 | 0.026158356 | 0.01548732  |
| ENSG00000041353 | 0.015991438 | 0.025354634 | 0.023938074 | 0.016173254 |
| ENSG00000006715 | 0.027109083 | 0.034762017 | 0.032489761 | 0.024621456 |
| ENSG00000143799 | 0.025525643 | 0.030756488 | 0.026984225 | 0.021468603 |
| ENSG00000137699 | 0.025541551 | 0.027783521 | 0.025738424 | 0.019051885 |
| ENSG00000081985 | 0.082068655 | 0.071258377 | 0.054034831 | 0.08072356  |
| ENSG00000137842 | 0.033849986 | 0.040883423 | 0.045910008 | 0.030499558 |
| ENSG00000188811 | 0.03170523  | 0.03573239  | 0.030865872 | 0.030517978 |
| ENSG00000115484 | 0.026309442 | 0.029848602 | 0.028697872 | 0.018592744 |
| ENSG00000148229 | 0.036428724 | 0.03707289  | 0.03955742  | 0.036200304 |
| ENSG00000129152 | 0.016931105 | 0.025318973 | 0.0247775   | 0.016627729 |
| ENSG00000110719 | 0.018246143 | 0.025046547 | 0.024432509 | 0.017102807 |
| ENSG00000176219 | 0.016274449 | 0.026051839 | 0.02722631  | 0.016613875 |
| ENSG00000185264 | 0.016306231 | 0.025542443 | 0.025805479 | 0.014567465 |
| ENSG00000143545 | 0.07519607  | 0.04531145  | 0.052052447 | 0.051448892 |
| ENSG00000092470 | 0.034415844 | 0.035315077 | 0.03075373  | 0.024705202 |
| ENSG00000100814 | 0.025944928 | 0.029320946 | 0.030884036 | 0.022729845 |
| ENSG00000149328 | 0.075954749 | 0.077579082 | 0.070660166 | 0.069809349 |
| ENSG00000204291 | 0.01850684  | 0.026223398 | 0.026817209 | 0.018396043 |
| ENSG00000163823 | 0.141445455 | 0.097784768 | 0.099055544 | 0.110791681 |
| ENSG00000170989 | 0.03658356  | 0.040627353 | 0.035903957 | 0.041667085 |
| ENSG00000154710 | 0.024305638 | 0.03645001  | 0.04199657  | 0.024724327 |
| ENSG00000108381 | 0.086532942 | 0.065546469 | 0.030753464 | 0.039800029 |
| ENSG00000132470 | 0.019055405 | 0.025895519 | 0.026166534 | 0.016763169 |
| ENSG00000182118 | 0.044951434 | 0.077540884 | 0.053300472 | 0.039788282 |
| ENSG00000162739 | 0.041016146 | 0.036290416 | 0.038051553 | 0.041886125 |
| ENSG00000139168 | 0.03263072  | 0.036107355 | 0.034671235 | 0.030406514 |
| ENSG00000065054 | 0.016627418 | 0.025318763 | 0.025224732 | 0.015566739 |
| ENSG00000164733 | 0.048902518 | 0.046412377 | 0.043025831 | 0.043304887 |
| ENSG00000212864 | 0.034811027 | 0.039724253 | 0.033475013 | 0.035073144 |
| ENSG00000124164 | 0.021149571 | 0.029638853 | 0.034047973 | 0.021241765 |
| ENSG00000198939 | 0.016139839 | 0.0244077   | 0.024464946 | 0.014364376 |
| ENSG00000136834 | 0.01583817  | 0.024974952 | 0.025974923 | 0.01567464  |
| ENSG00000169951 | 0.023645292 | 0.033975827 | 0.034324084 | 0.024510681 |
| ENSG00000187003 | 0.016199188 | 0.0259187   | 0.02614598  | 0.016646208 |
| ENSG00000198887 | 0.034148258 | 0.040989754 | 0.035649543 | 0.028558675 |
| ENSG00000175164 | 0.019625255 | 0.026913494 | 0.026664049 | 0.018412971 |
| ENSG00000164600 | 0.017772423 | 0.024784576 | 0.026261081 | 0.016007054 |
| ENSG00000124406 | 0.05873852  | 0.055088235 | 0.041768693 | 0.042084135 |
| ENSG00000165959 | 0.080721641 | 0.079338348 | 0.066104385 | 0.066893477 |
| ENSG00000166974 | 0.037030606 | 0.041845817 | 0.036951799 | 0.033572841 |
| ENSG00000140650 | 0.040487839 | 0.044751603 | 0.061821768 | 0.047214383 |

|                 |             |             |             |             |
|-----------------|-------------|-------------|-------------|-------------|
| ENSG00000184787 | 0.019080426 | 0.02508923  | 0.025603871 | 0.016051393 |
| ENSG00000130856 | 0.026413711 | 0.037589996 | 0.028320589 | 0.023420847 |
| ENSG00000132475 | 0.040846217 | 0.048258735 | 0.046179658 | 0.032780336 |
| ENSG00000167104 | 0.015768055 | 0.026328558 | 0.025422352 | 0.0159977   |
| ENSG00000162704 | 0.021846285 | 0.02914972  | 0.026777712 | 0.021649601 |
| ENSG00000180694 | 0.022919363 | 0.032104948 | 0.02860306  | 0.018523035 |
| ENSG00000096006 | 0.018623649 | 0.025537135 | 0.026020134 | 0.015526667 |
| ENSG00000115474 | 0.015408847 | 0.026391018 | 0.024912533 | 0.015274742 |
| ENSG00000173826 | 0.015994738 | 0.025112791 | 0.025214159 | 0.01548079  |
| ENSG00000171396 | 0.015304847 | 0.025048978 | 0.02455014  | 0.015832416 |
| ENSG00000204764 | 0.016241094 | 0.026385765 | 0.024855442 | 0.01462829  |
| ENSG00000107566 | 0.033697279 | 0.037743177 | 0.034223043 | 0.027951613 |
| ENSG00000134588 | 0.016152878 | 0.025296264 | 0.025543195 | 0.015103264 |
| ENSG00000136982 | 0.047966737 | 0.044878297 | 0.035315833 | 0.04036234  |
| ENSG00000145919 | 0.026339157 | 0.028993716 | 0.028519985 | 0.024927296 |
| ENSG00000184792 | 0.019115581 | 0.025744435 | 0.02638085  | 0.017193102 |
| ENSG00000167994 | 0.015889486 | 0.024881601 | 0.024190538 | 0.014265839 |
| ENSG00000151746 | 0.029379065 | 0.038423539 | 0.032800998 | 0.031700328 |
| ENSG00000163125 | 0.028110475 | 0.031897946 | 0.044472394 | 0.025436058 |
| ENSG00000065613 | 0.039669393 | 0.041138888 | 0.037127646 | 0.036547755 |
| ENSG00000064042 | 0.015379562 | 0.024552563 | 0.024066528 | 0.014892815 |
| ENSG00000104320 | 0.033658353 | 0.042105344 | 0.038142282 | 0.040145474 |
| ENSG00000147138 | 0.033439995 | 0.038437869 | 0.034793279 | 0.030672166 |
| ENSG00000198113 | 0.03247826  | 0.04150894  | 0.051203813 | 0.033466257 |
| ENSG00000128683 | 0.058839203 | 0.038705053 | 0.042270474 | 0.053957051 |
| ENSG00000116030 | 0.025824147 | 0.029163594 | 0.02700542  | 0.028384906 |
| ENSG00000128573 | 0.015639946 | 0.024848796 | 0.024747725 | 0.016451845 |
| ENSG00000187187 | 0.033969765 | 0.044557469 | 0.035086437 | 0.031727418 |
| ENSG00000141084 | 0.02814523  | 0.031660523 | 0.030774429 | 0.024313622 |
| ENSG00000143199 | 0.01541927  | 0.024506103 | 0.02480115  | 0.016166829 |
| ENSG00000178665 | 0.017983415 | 0.027322483 | 0.026695753 | 0.022203108 |
| ENSG00000168646 | 0.01744237  | 0.026863661 | 0.0257311   | 0.016228417 |
| ENSG00000106278 | 0.015974159 | 0.024864612 | 0.024687461 | 0.016221243 |
| ENSG00000141371 | 0.016018929 | 0.02602744  | 0.026165862 | 0.015084484 |
| ENSG00000014914 | 0.016474597 | 0.025713502 | 0.025429192 | 0.014932134 |
| ENSG00000197756 | 0.015312443 | 0.030032155 | 0.031164126 | 0.020009906 |
| ENSG00000185527 | 0.073388351 | 0.067564441 | 0.049613227 | 0.064915668 |
| ENSG00000144045 | 0.017056462 | 0.026732396 | 0.026187204 | 0.019159836 |
| ENSG00000197406 | 0.016339221 | 0.026152451 | 0.025444375 | 0.015747272 |
| ENSG00000113391 | 0.035257269 | 0.042148411 | 0.034933196 | 0.030232287 |
| ENSG00000104442 | 0.024624324 | 0.031638664 | 0.028257178 | 0.022711314 |
| ENSG00000101680 | 0.020421343 | 0.029089863 | 0.025214441 | 0.017592227 |
| ENSG00000146223 | 0.037528703 | 0.036171007 | 0.033206243 | 0.027827724 |
| ENSG00000184280 | 0.049278985 | 0.042197477 | 0.032540785 | 0.036318786 |
| ENSG00000073754 | 0.018616901 | 0.026616772 | 0.025747333 | 0.017842122 |
| ENSG00000076321 | 0.023974061 | 0.030259597 | 0.032936858 | 0.021322301 |
| ENSG00000066135 | 0.021521101 | 0.028933007 | 0.029105013 | 0.019297375 |
| ENSG00000128713 | 0.015983455 | 0.024674548 | 0.025447917 | 0.015770622 |
| ENSG00000152078 | 0.022540983 | 0.02948973  | 0.026636665 | 0.019899579 |
| ENSG00000170175 | 0.029164966 | 0.028860104 | 0.030487869 | 0.028559631 |
| ENSG00000151718 | 0.020950895 | 0.02726602  | 0.026207501 | 0.018050909 |
| ENSG00000163331 | 0.017808339 | 0.025850188 | 0.024748481 | 0.015569632 |
| ENSG00000108771 | 0.051745999 | 0.04048799  | 0.041457952 | 0.037145976 |
| ENSG00000139908 | 0.016688251 | 0.024848141 | 0.024877138 | 0.017056942 |

|                 |             |             |             |             |
|-----------------|-------------|-------------|-------------|-------------|
| ENSG00000186153 | 0.017646284 | 0.026762926 | 0.027342911 | 0.018466501 |
| ENSG00000069849 | 0.026512556 | 0.030523749 | 0.029596929 | 0.021990934 |
| ENSG00000110841 | 0.020329586 | 0.030364244 | 0.025341471 | 0.018751575 |
| ENSG00000135476 | 0.039775165 | 0.030772574 | 0.032677041 | 0.027908578 |
| ENSG00000141569 | 0.020260407 | 0.025186668 | 0.026502329 | 0.015689365 |
| ENSG00000198380 | 0.04331659  | 0.046475327 | 0.041616366 | 0.034543592 |
| ENSG00000011143 | 0.030362306 | 0.032879206 | 0.030359078 | 0.023091061 |
| ENSG00000152904 | 0.023422837 | 0.032934439 | 0.03075232  | 0.024828023 |
| ENSG00000115762 | 0.029564227 | 0.031620191 | 0.035627918 | 0.024394403 |
| ENSG00000249709 | 0.022505145 | 0.028923368 | 0.027850953 | 0.020574439 |
| ENSG00000164035 | 0.01525089  | 0.025671117 | 0.025451047 | 0.014218886 |
| ENSG00000196600 | 0.016184193 | 0.02569002  | 0.025705244 | 0.016749992 |
| ENSG00000122966 | 0.045484068 | 0.037161366 | 0.034902866 | 0.028973607 |
| ENSG00000244165 | 0.050444121 | 0.044666227 | 0.052112163 | 0.045448912 |
| ENSG00000173890 | 0.069822324 | 0.065017429 | 0.06117055  | 0.055713835 |
| ENSG00000129595 | 0.05182437  | 0.057329034 | 0.05117826  | 0.056035279 |
| ENSG00000151876 | 0.015672314 | 0.024121864 | 0.024722747 | 0.014223023 |
| ENSG00000168918 | 0.023374525 | 0.033367451 | 0.030993722 | 0.028302824 |
| ENSG00000125355 | 0.048150001 | 0.049095219 | 0.047988316 | 0.042988134 |
| ENSG00000112319 | 0.017430816 | 0.024394144 | 0.02718954  | 0.016221737 |
| ENSG00000188986 | 0.023814065 | 0.030563404 | 0.033865445 | 0.0237725   |
| ENSG00000197181 | 0.017227152 | 0.025515035 | 0.025335675 | 0.016482725 |
| ENSG00000136098 | 0.015310814 | 0.024512697 | 0.025014743 | 0.016154857 |
| ENSG00000134897 | 0.040254291 | 0.04354315  | 0.032760507 | 0.029594107 |
| ENSG00000180305 | 0.015678496 | 0.024980838 | 0.025443713 | 0.015622729 |
| ENSG00000240403 | 0.015219039 | 0.026380163 | 0.024201462 | 0.015092998 |
| ENSG00000040933 | 0.048311141 | 0.048081419 | 0.048709569 | 0.041130104 |
| ENSG00000152763 | 0.016258889 | 0.024345216 | 0.025816852 | 0.015619567 |
| ENSG00000235863 | 0.035578266 | 0.031488895 | 0.034963724 | 0.034526774 |
| ENSG00000116957 | 0.026669421 | 0.03096551  | 0.031011498 | 0.022683706 |
| ENSG00000132703 | 0.017565018 | 0.025700815 | 0.024637113 | 0.015550864 |
| ENSG00000131381 | 0.015887946 | 0.025113241 | 0.025209579 | 0.015433705 |
| ENSG00000153237 | 0.015222643 | 0.024167933 | 0.025124747 | 0.015175703 |
| ENSG00000148426 | 0.028107284 | 0.026978807 | 0.028359816 | 0.020425088 |
| ENSG00000121851 | 0.029314919 | 0.034224664 | 0.030345981 | 0.021168925 |
| ENSG00000166664 | 0.015760153 | 0.024877355 | 0.0258497   | 0.015019497 |
| ENSG00000115944 | 0.021871052 | 0.031052825 | 0.028686573 | 0.020744002 |
| ENSG00000137054 | 0.02876727  | 0.03607324  | 0.033791961 | 0.025732348 |
| ENSG00000132026 | 0.016774301 | 0.026126815 | 0.024740678 | 0.015273843 |
| ENSG00000155886 | 0.016892087 | 0.026113647 | 0.024648702 | 0.016541447 |
| ENSG00000179002 | 0.018380641 | 0.024941811 | 0.0273747   | 0.018785018 |
| ENSG00000138802 | 0.026697183 | 0.032937128 | 0.029556611 | 0.026681482 |
| ENSG00000115266 | 0.020264622 | 0.02717766  | 0.027719788 | 0.018293435 |
| ENSG00000164896 | 0.026170229 | 0.03076228  | 0.030163337 | 0.026689377 |
| ENSG00000158022 | 0.022103666 | 0.025278276 | 0.024351354 | 0.021489507 |
| ENSG00000004864 | 0.044791339 | 0.039399631 | 0.034181092 | 0.040892693 |
| ENSG00000151846 | 0.024677864 | 0.025561427 | 0.026444198 | 0.016648276 |
| ENSG00000176402 | 0.018949774 | 0.024651652 | 0.025157363 | 0.018102705 |
| ENSG00000139613 | 0.017371707 | 0.026075181 | 0.026368114 | 0.01680433  |
| ENSG00000181396 | 0.025505881 | 0.029991205 | 0.027620093 | 0.022799162 |
| ENSG00000206075 | 0.017201031 | 0.024980288 | 0.025856772 | 0.016826058 |
| ENSG00000100425 | 0.03080718  | 0.036392865 | 0.03418745  | 0.026063372 |
| ENSG00000047188 | 0.033344509 | 0.038521797 | 0.031890112 | 0.034044682 |
| ENSG00000198797 | 0.01585901  | 0.024927873 | 0.025030322 | 0.014738809 |

|                 |             |             |             |             |
|-----------------|-------------|-------------|-------------|-------------|
| ENSG00000092421 | 0.023164943 | 0.031114554 | 0.029204493 | 0.020474875 |
| ENSG00000187266 | 0.033201489 | 0.044669289 | 0.034120959 | 0.035149524 |
| ENSG00000113580 | 0.039434226 | 0.039651749 | 0.03817672  | 0.035103191 |
| ENSG00000104853 | 0.024873544 | 0.029320832 | 0.036855702 | 0.029288307 |
| ENSG00000169122 | 0.066329002 | 0.051836216 | 0.045831992 | 0.060715614 |
| ENSG00000111652 | 0.026502454 | 0.029126708 | 0.029156608 | 0.026258387 |
| ENSG00000158864 | 0.025130727 | 0.029435791 | 0.029477917 | 0.020845907 |
| ENSG00000168268 | 0.049333254 | 0.047534487 | 0.053143615 | 0.042587004 |
| ENSG00000166710 | 0.014677383 | 0.024180389 | 0.0243546   | 0.014277573 |
| ENSG00000051825 | 0.041396971 | 0.041213413 | 0.032792912 | 0.025475668 |
| ENSG00000078142 | 0.033767682 | 0.040045589 | 0.031682517 | 0.024332203 |
| ENSG00000144031 | 0.014821262 | 0.023960176 | 0.025438546 | 0.015427302 |
| ENSG00000183783 | 0.015886918 | 0.026572069 | 0.024392767 | 0.014937157 |
| ENSG00000146826 | 0.029479187 | 0.03384737  | 0.041637485 | 0.032154608 |
| ENSG00000048740 | 0.040243399 | 0.049115368 | 0.033825262 | 0.033555187 |
| ENSG00000137857 | 0.016368172 | 0.026502883 | 0.026211074 | 0.016246762 |
| ENSG00000186297 | 0.016359803 | 0.024774363 | 0.025844587 | 0.017075079 |
| ENSG00000164066 | 0.024521398 | 0.03350417  | 0.026036584 | 0.020141186 |
| ENSG00000011566 | 0.03850825  | 0.036953154 | 0.033015903 | 0.037633415 |
| ENSG00000014216 | 0.029703597 | 0.034175034 | 0.030664221 | 0.023360808 |
| ENSG00000063761 | 0.021366681 | 0.027542388 | 0.02512281  | 0.019567432 |
| ENSG00000139874 | 0.015625202 | 0.024983708 | 0.024281637 | 0.01473987  |
| ENSG00000152049 | 0.015131786 | 0.025315589 | 0.025068359 | 0.015273801 |
| ENSG00000156113 | 0.12960319  | 0.088558302 | 0.064526358 | 0.10902697  |
| ENSG00000080493 | 0.051814972 | 0.028016592 | 0.027126397 | 0.0199489   |
| ENSG00000079689 | 0.015525013 | 0.025062998 | 0.024437611 | 0.015590498 |
| ENSG00000154188 | 0.015099477 | 0.025441748 | 0.024911751 | 0.015768009 |
| ENSG00000231925 | 0.037256292 | 0.036635489 | 0.033283319 | 0.032058896 |
| ENSG00000253950 | 0.036842174 | 0.035218488 | 0.037003555 | 0.030064287 |
| ENSG00000131378 | 0.024378875 | 0.031073224 | 0.029298497 | 0.023977538 |
| ENSG00000119714 | 0.014617581 | 0.024057889 | 0.025414623 | 0.015762308 |
| ENSG00000133740 | 0.032984101 | 0.039819114 | 0.034772012 | 0.031176311 |
| ENSG00000196453 | 0.033048946 | 0.043459033 | 0.041894125 | 0.033436819 |
| ENSG00000092096 | 0.01503065  | 0.024873764 | 0.024854616 | 0.015475664 |
| ENSG00000131187 | 0.067366932 | 0.05789567  | 0.058753597 | 0.072466815 |
| ENSG00000136100 | 0.030038634 | 0.035721345 | 0.032263576 | 0.02392525  |
| ENSG00000165655 | 0.140026644 | 0.090006266 | 0.081832483 | 0.091370274 |
| ENSG00000163104 | 0.030821724 | 0.035368074 | 0.030726972 | 0.027878004 |
| ENSG00000048392 | 0.040661284 | 0.045096584 | 0.035394911 | 0.037786835 |
| ENSG00000070601 | 0.016290671 | 0.025739672 | 0.024469482 | 0.014979817 |
| ENSG00000121716 | 0.017740014 | 0.02688829  | 0.027442756 | 0.016457273 |
| ENSG00000125875 | 0.02725272  | 0.031178366 | 0.031532464 | 0.021933422 |
| ENSG00000148795 | 0.017460782 | 0.025046338 | 0.024924348 | 0.01691382  |
| ENSG00000107165 | 0.017460084 | 0.025389975 | 0.025064601 | 0.015556617 |
| ENSG00000101439 | 0.065219743 | 0.066528436 | 0.054297436 | 0.057174596 |
| ENSG00000116525 | 0.016742998 | 0.02522844  | 0.027936708 | 0.016065593 |
| ENSG00000163521 | 0.028681487 | 0.032261539 | 0.034561548 | 0.030280726 |
| ENSG00000135090 | 0.015106956 | 0.025413267 | 0.024287008 | 0.014015214 |
| ENSG00000198049 | 0.015676615 | 0.025201355 | 0.025451929 | 0.015289592 |
| ENSG00000091831 | 0.018753267 | 0.030187439 | 0.025425341 | 0.021388208 |
| ENSG00000186310 | 0.024602053 | 0.025021794 | 0.024080516 | 0.014952996 |
| ENSG00000116151 | 0.0161813   | 0.026471879 | 0.025280975 | 0.025104108 |
| ENSG00000181781 | 0.017012511 | 0.025239038 | 0.025216359 | 0.018163845 |
| ENSG00000164932 | 0.026437631 | 0.027108827 | 0.025090629 | 0.022898019 |

|                 |             |             |             |             |
|-----------------|-------------|-------------|-------------|-------------|
| ENSG0000075945  | 0.042795751 | 0.051182862 | 0.043279014 | 0.037846248 |
| ENSG00000158352 | 0.015719451 | 0.025658135 | 0.024250719 | 0.014399983 |
| ENSG00000197079 | 0.018856293 | 0.026658458 | 0.024915384 | 0.017623058 |
| ENSG00000138434 | 0.05135125  | 0.046441429 | 0.043731088 | 0.043413156 |
| ENSG00000162191 | 0.020186447 | 0.02733209  | 0.027724609 | 0.021151679 |
| ENSG00000102900 | 0.025493562 | 0.028145457 | 0.030652683 | 0.02436468  |
| ENSG00000050438 | 0.021920085 | 0.024901009 | 0.02749368  | 0.019786638 |
| ENSG00000124356 | 0.025775305 | 0.031321559 | 0.029042237 | 0.021321728 |
| ENSG00000172995 | 0.015155817 | 0.024553239 | 0.024183909 | 0.016218803 |
| ENSG00000198597 | 0.01723926  | 0.025161317 | 0.025828869 | 0.017030561 |
| ENSG00000213934 | 0.061224933 | 0.026942187 | 0.025689513 | 0.02075979  |
| ENSG00000150753 | 0.033211161 | 0.034730196 | 0.031936369 | 0.03012165  |
| ENSG00000179195 | 0.029323936 | 0.037872132 | 0.032655164 | 0.02221579  |
| ENSG00000172531 | 0.024433706 | 0.027935581 | 0.029475077 | 0.021574757 |
| ENSG00000071054 | 0.043937678 | 0.029888064 | 0.027088996 | 0.022018101 |
| ENSG00000166321 | 0.024127415 | 0.033858209 | 0.028670692 | 0.023336973 |
| ENSG00000124588 | 0.061981204 | 0.070511811 | 0.068506332 | 0.049978037 |
| ENSG00000165891 | 0.048403343 | 0.050815205 | 0.044367931 | 0.054625222 |
| ENSG00000076258 | 0.034831261 | 0.034699769 | 0.031392096 | 0.028969739 |
| ENSG00000188316 | 0.017503454 | 0.025339448 | 0.025915742 | 0.016916152 |
| ENSG00000242247 | 0.0264956   | 0.03290134  | 0.035597653 | 0.02805393  |
| ENSG00000006128 | 0.026748686 | 0.028499663 | 0.027260338 | 0.030828419 |
| ENSG00000151952 | 0.020001806 | 0.028065174 | 0.027371884 | 0.01880825  |
| ENSG00000172288 | 0.015920685 | 0.024191749 | 0.024783556 | 0.015489438 |
| ENSG00000137880 | 0.047732126 | 0.04776401  | 0.048974266 | 0.045815252 |
| ENSG00000112312 | 0.036612819 | 0.031543294 | 0.032145773 | 0.033543131 |
| ENSG00000121653 | 0.020632291 | 0.026242147 | 0.026880016 | 0.017330545 |
| ENSG00000103855 | 0.017658238 | 0.0259387   | 0.026163029 | 0.017850895 |
| ENSG00000157350 | 0.043107687 | 0.041500736 | 0.039412846 | 0.032296454 |
| ENSG00000176986 | 0.021395623 | 0.027414926 | 0.031162958 | 0.024224056 |
| ENSG00000197329 | 0.036546128 | 0.039077893 | 0.034981355 | 0.032888112 |
| ENSG00000144824 | 0.043972873 | 0.033004425 | 0.02668128  | 0.023456598 |
| ENSG00000155629 | 0.062105262 | 0.060906629 | 0.058648935 | 0.07717362  |
| ENSG00000126107 | 0.02553932  | 0.031047042 | 0.032018286 | 0.028020685 |
| ENSG00000197312 | 0.016423085 | 0.025803228 | 0.024925218 | 0.015136507 |
| ENSG00000172575 | 0.062236258 | 0.057081073 | 0.050223273 | 0.063479218 |
| ENSG00000059915 | 0.017654617 | 0.024821724 | 0.027357994 | 0.015724642 |
| ENSG00000198498 | 0.039142799 | 0.03441128  | 0.032086982 | 0.039482781 |
| ENSG00000086288 | 0.084983624 | 0.03694198  | 0.036930182 | 0.068238967 |
| ENSG00000106665 | 0.026933608 | 0.038048152 | 0.029013307 | 0.026495681 |
| ENSG00000198075 | 0.015839505 | 0.025829829 | 0.026705985 | 0.014813489 |
| ENSG00000185559 | 0.016115333 | 0.025509638 | 0.025093602 | 0.016111561 |
| ENSG00000114854 | 0.020499532 | 0.027146509 | 0.027323166 | 0.02248604  |
| ENSG00000185792 | 0.017003225 | 0.02478335  | 0.024493365 | 0.015720905 |
| ENSG00000180611 | 0.084756328 | 0.071094534 | 0.094134553 | 0.11257369  |
| ENSG00000172732 | 0.022513299 | 0.029667238 | 0.030290186 | 0.024454159 |
| ENSG00000129472 | 0.02617192  | 0.030480275 | 0.031600088 | 0.022322173 |
| ENSG00000091140 | 0.022762644 | 0.030116382 | 0.029606588 | 0.025421745 |
| ENSG00000140675 | 0.019346066 | 0.028343328 | 0.026816383 | 0.01799944  |
| ENSG00000084110 | 0.016032318 | 0.025594732 | 0.025006223 | 0.016571131 |
| ENSG00000135845 | 0.030127256 | 0.03252799  | 0.033190854 | 0.025733509 |
| ENSG00000125319 | 0.03685451  | 0.033094544 | 0.035491219 | 0.029689533 |
| ENSG00000076555 | 0.016499607 | 0.025628362 | 0.026759337 | 0.016067866 |
| ENSG00000123472 | 0.026160473 | 0.031768509 | 0.032008481 | 0.019394935 |



|                 |             |             |             |             |
|-----------------|-------------|-------------|-------------|-------------|
| ENSG00000161526 | 0.025685872 | 0.028346172 | 0.029220548 | 0.022242517 |
| ENSG00000185168 | 0.015355331 | 0.024857753 | 0.024454499 | 0.014972408 |
| ENSG00000165209 | 0.029636675 | 0.036018956 | 0.035581453 | 0.02963361  |
| ENSG00000173699 | 0.026380201 | 0.030172447 | 0.034755074 | 0.022142913 |
| ENSG00000187531 | 0.029584087 | 0.034954441 | 0.036740816 | 0.025472418 |
| ENSG00000096088 | 0.0163762   | 0.02572883  | 0.02567419  | 0.016314156 |
| ENSG00000127743 | 0.017202187 | 0.024426384 | 0.024313465 | 0.015238269 |
| ENSG00000132872 | 0.017111241 | 0.025440655 | 0.024995631 | 0.017431669 |
| ENSG00000101255 | 0.058930342 | 0.050633146 | 0.041684475 | 0.038380063 |
| ENSG00000116120 | 0.020099921 | 0.026749543 | 0.027674202 | 0.018542442 |
| ENSG00000168772 | 0.068276949 | 0.07469191  | 0.07078072  | 0.076885625 |
| ENSG00000130734 | 0.018277644 | 0.028304998 | 0.027208675 | 0.017434914 |
| ENSG00000171735 | 0.019866544 | 0.027887642 | 0.026041117 | 0.020044961 |
| ENSG00000197168 | 0.016360591 | 0.024428197 | 0.024728528 | 0.014084931 |
| ENSG00000103546 | 0.017134639 | 0.026706373 | 0.025849426 | 0.017399899 |
| ENSG00000071242 | 0.042162459 | 0.03718736  | 0.03161013  | 0.035169278 |
| ENSG00000078618 | 0.028989    | 0.031520396 | 0.028947028 | 0.025077607 |
| ENSG00000172292 | 0.04251036  | 0.041401772 | 0.041320242 | 0.032705377 |
| ENSG00000179817 | 0.016912525 | 0.025609287 | 0.025876626 | 0.014498882 |
| ENSG00000138115 | 0.018808537 | 0.027273873 | 0.025417374 | 0.018851994 |
| ENSG00000105376 | 0.060812534 | 0.052941316 | 0.049538909 | 0.054149596 |
| ENSG00000170289 | 0.019186561 | 0.026158054 | 0.025195837 | 0.017860481 |
| ENSG00000145040 | 0.015732701 | 0.026326188 | 0.025976263 | 0.016572705 |
| ENSG00000122584 | 0.013592563 | 0.024470102 | 0.024945691 | 0.014420553 |
| ENSG00000183960 | 0.017656006 | 0.026835495 | 0.026744674 | 0.017106785 |
| ENSG00000107262 | 0.024413955 | 0.030838908 | 0.032221658 | 0.025350124 |
| ENSG00000125531 | 0.018307403 | 0.026177943 | 0.026269003 | 0.019481742 |
| ENSG00000089060 | 0.021745291 | 0.037560465 | 0.035513014 | 0.023655508 |
| ENSG00000015676 | 0.026467778 | 0.032552394 | 0.034362617 | 0.024784522 |
| ENSG00000112996 | 0.023102324 | 0.028914863 | 0.028150198 | 0.019612528 |
| ENSG00000155085 | 0.017995575 | 0.02462937  | 0.025829889 | 0.018009631 |
| ENSG00000164296 | 0.01927453  | 0.025935231 | 0.030216508 | 0.017616248 |
| ENSG00000125746 | 0.030741861 | 0.030470751 | 0.028781432 | 0.022527766 |
| ENSG00000154342 | 0.037014105 | 0.048436663 | 0.02701941  | 0.029933435 |
| ENSG00000148136 | 0.015536416 | 0.02511255  | 0.025859891 | 0.015227283 |
| ENSG00000196611 | 0.018073257 | 0.026165026 | 0.024779766 | 0.016105722 |
| ENSG00000137124 | 0.046116427 | 0.03388285  | 0.034059405 | 0.033507629 |
| ENSG00000198715 | 0.034461116 | 0.033601802 | 0.030956062 | 0.028221334 |
| ENSG00000005471 | 0.048711023 | 0.054104202 | 0.045792729 | 0.051054953 |
| ENSG00000152219 | 0.026809446 | 0.033287507 | 0.035304906 | 0.028449332 |
| ENSG00000109466 | 0.031518148 | 0.036239325 | 0.032487095 | 0.030912722 |
| ENSG00000185272 | 0.025021718 | 0.026386201 | 0.025947423 | 0.018767864 |
| ENSG00000088782 | 0.017044195 | 0.025506455 | 0.025255299 | 0.017502221 |
| ENSG00000154451 | 0.095683651 | 0.065096654 | 0.072692807 | 0.076321665 |
| ENSG00000180011 | 0.038614885 | 0.039038902 | 0.034825624 | 0.029626959 |
| ENSG00000164438 | 0.016597588 | 0.025915167 | 0.02493369  | 0.015214874 |
| ENSG00000163882 | 0.029747871 | 0.029977553 | 0.02834275  | 0.02134849  |
| ENSG00000081026 | 0.01612674  | 0.024901716 | 0.024125515 | 0.014234356 |
| ENSG00000143315 | 0.043105964 | 0.040506408 | 0.034619099 | 0.029335536 |
| ENSG00000176797 | 0.015489347 | 0.025728592 | 0.024657316 | 0.014422103 |
| ENSG00000163497 | 0.015146302 | 0.024603592 | 0.025333801 | 0.014764417 |
| ENSG00000129353 | 0.050700823 | 0.040826333 | 0.041612833 | 0.040206097 |
| ENSG00000135776 | 0.032704376 | 0.038354091 | 0.03537036  | 0.028897244 |
| ENSG00000104823 | 0.02338359  | 0.031113481 | 0.032055892 | 0.025202939 |

|                 |             |             |             |             |
|-----------------|-------------|-------------|-------------|-------------|
| ENSG00000198860 | 0.039534771 | 0.036632537 | 0.035141475 | 0.041200936 |
| ENSG00000101883 | 0.029078465 | 0.029778341 | 0.033849435 | 0.029635991 |
| ENSG00000125744 | 0.041097631 | 0.03676429  | 0.035104965 | 0.034412043 |
| ENSG00000165810 | 0.030620508 | 0.025101182 | 0.026951495 | 0.025381979 |
| ENSG00000165792 | 0.027701956 | 0.030025926 | 0.027665275 | 0.023195406 |
| ENSG00000187546 | 0.017341997 | 0.024122963 | 0.024908524 | 0.014487144 |
| ENSG00000196917 | 0.025025399 | 0.026467223 | 0.02744255  | 0.016982532 |
| ENSG00000076356 | 0.016373846 | 0.0258785   | 0.02577594  | 0.014707055 |
| ENSG00000117154 | 0.018068438 | 0.026728558 | 0.024774046 | 0.017482038 |
| ENSG00000117519 | 0.125323706 | 0.100048281 | 0.077683333 | 0.091067028 |
| ENSG00000162482 | 0.016354773 | 0.025430146 | 0.024803446 | 0.018243929 |
| ENSG00000139697 | 0.036198521 | 0.045804396 | 0.037941505 | 0.03692376  |
| ENSG00000204120 | 0.024839233 | 0.034300314 | 0.029307992 | 0.022681448 |
| ENSG00000140511 | 0.019657127 | 0.02772904  | 0.029497517 | 0.021880507 |
| ENSG00000115524 | 0.024474153 | 0.032215733 | 0.028962947 | 0.020316749 |
| ENSG00000160888 | 0.031936871 | 0.033753295 | 0.036585335 | 0.032386687 |
| ENSG00000178057 | 0.037639652 | 0.031114175 | 0.032177486 | 0.039687599 |
| ENSG00000143333 | 0.050865203 | 0.045783255 | 0.048367194 | 0.050649433 |
| ENSG00000115129 | 0.055838492 | 0.047175232 | 0.04449771  | 0.043425543 |
| ENSG00000007541 | 0.028200312 | 0.037912541 | 0.039468711 | 0.034991521 |
| ENSG00000184857 | 0.023200492 | 0.028655278 | 0.031692505 | 0.019067301 |
| ENSG00000010610 | 0.048094933 | 0.03369937  | 0.030623246 | 0.056501955 |
| ENSG00000138207 | 0.015594484 | 0.026145621 | 0.024669871 | 0.018488449 |
| ENSG00000072401 | 0.027228419 | 0.035363727 | 0.030804196 | 0.027221712 |
| ENSG00000151881 | 0.031975967 | 0.033491765 | 0.034670711 | 0.03263385  |
| ENSG00000161807 | 0.016247314 | 0.025096852 | 0.024330367 | 0.015080942 |
| ENSG00000205356 | 0.027381904 | 0.033364501 | 0.035028605 | 0.032336044 |
| ENSG00000167992 | 0.05111792  | 0.050452698 | 0.036579137 | 0.043082035 |
| ENSG00000136522 | 0.028863684 | 0.033608538 | 0.031514386 | 0.037073181 |
| ENSG00000108523 | 0.041986212 | 0.044657748 | 0.050435255 | 0.031475764 |
| ENSG00000129317 | 0.039309764 | 0.038441677 | 0.032198647 | 0.030190042 |
| ENSG00000110148 | 0.016196423 | 0.025388467 | 0.026117887 | 0.015777751 |
| ENSG00000105679 | 0.018569421 | 0.026614685 | 0.026434728 | 0.017039572 |
| ENSG00000150527 | 0.016159488 | 0.025665257 | 0.024754987 | 0.015947916 |
| ENSG00000122696 | 0.018684138 | 0.026391368 | 0.026091065 | 0.020537338 |
| ENSG00000132383 | 0.026233984 | 0.033312053 | 0.031301246 | 0.027460058 |
| ENSG00000129003 | 0.029505149 | 0.036577078 | 0.0330865   | 0.026580091 |
| ENSG00000153779 | 0.016031027 | 0.023764757 | 0.024797075 | 0.014650895 |
| ENSG00000002586 | 0.047742453 | 0.053359298 | 0.048873791 | 0.041069227 |
| ENSG00000197822 | 0.064354599 | 0.046103195 | 0.038960241 | 0.048617142 |
| ENSG00000118271 | 0.016471894 | 0.025787503 | 0.027415919 | 0.015369736 |
| ENSG00000186844 | 0.02710905  | 0.025286963 | 0.026551535 | 0.017949645 |
| ENSG00000165219 | 0.024833714 | 0.031319968 | 0.033308336 | 0.025668746 |
| ENSG00000166896 | 0.046588261 | 0.037370786 | 0.040304051 | 0.027734836 |
| ENSG00000091844 | 0.090968872 | 0.049933727 | 0.03637203  | 0.066575096 |
| ENSG00000153064 | 0.127120073 | 0.104740705 | 0.09276584  | 0.114480226 |
| ENSG00000139546 | 0.029234484 | 0.03346521  | 0.034372864 | 0.025711887 |
| ENSG00000119866 | 0.042049093 | 0.043355697 | 0.039366486 | 0.045030254 |
| ENSG00000189252 | 0.018043948 | 0.026718961 | 0.025811372 | 0.018235561 |
| ENSG00000170482 | 0.016232993 | 0.027021653 | 0.027505831 | 0.015617738 |
| ENSG00000139572 | 0.035157948 | 0.0361733   | 0.040631868 | 0.043103037 |
| ENSG00000111845 | 0.033122975 | 0.035399068 | 0.036704661 | 0.033500663 |
| ENSG00000186446 | 0.015706391 | 0.024694124 | 0.024538584 | 0.015282387 |
| ENSG00000101464 | 0.031160283 | 0.031961456 | 0.031896367 | 0.024549356 |

|                 |             |             |             |             |
|-----------------|-------------|-------------|-------------|-------------|
| ENSG00000198657 | 0.016869552 | 0.025213765 | 0.024382013 | 0.014566589 |
| ENSG00000164972 | 0.02513638  | 0.029478941 | 0.03303895  | 0.020110038 |
| ENSG00000077092 | 0.015769277 | 0.026145139 | 0.025375802 | 0.014691264 |
| ENSG00000171067 | 0.032452168 | 0.034263591 | 0.035108615 | 0.027765539 |
| ENSG00000205277 | 0.024462198 | 0.037727278 | 0.038431383 | 0.030935595 |
| ENSG00000182255 | 0.01621551  | 0.026101079 | 0.026259027 | 0.01617408  |
| ENSG00000242441 | 0.015447073 | 0.025382507 | 0.024434863 | 0.014973322 |
| ENSG00000132744 | 0.120101864 | 0.106959321 | 0.101768987 | 0.11579597  |
| ENSG00000135951 | 0.022709551 | 0.028257945 | 0.028669758 | 0.019623195 |
| ENSG00000178828 | 0.018964847 | 0.026662393 | 0.026226742 | 0.016456739 |
| ENSG00000214819 | 0.015309803 | 0.025190935 | 0.024412733 | 0.015048198 |
| ENSG00000066455 | 0.027345932 | 0.034282547 | 0.035914007 | 0.026643645 |
| ENSG00000228278 | 0.017818325 | 0.025722899 | 0.027029253 | 0.016003866 |
| ENSG00000197530 | 0.036913864 | 0.033348351 | 0.039754263 | 0.030929023 |
| ENSG00000171055 | 0.037114835 | 0.043629154 | 0.037111926 | 0.032197282 |
| ENSG00000248746 | 0.03689418  | 0.031575451 | 0.027488155 | 0.030296469 |
| ENSG00000163221 | 0.016469691 | 0.024927133 | 0.025557091 | 0.015774771 |
| ENSG00000198563 | 0.023064149 | 0.027910428 | 0.032978152 | 0.022447351 |
| ENSG00000182583 | 0.066708948 | 0.03447031  | 0.037128072 | 0.045082376 |
| ENSG00000118217 | 0.023474832 | 0.032026516 | 0.033183278 | 0.026304762 |
| ENSG00000184056 | 0.02336888  | 0.031514922 | 0.03020697  | 0.020390873 |
| ENSG00000138757 | 0.027260031 | 0.032451627 | 0.032202089 | 0.022241379 |
| ENSG00000142867 | 0.016336867 | 0.025964959 | 0.025371156 | 0.016212827 |
| ENSG00000187288 | 0.019952905 | 0.027664909 | 0.029508896 | 0.019393672 |
| ENSG00000011304 | 0.021877943 | 0.027624811 | 0.026878393 | 0.019760616 |
| ENSG00000154975 | 0.016455402 | 0.026193321 | 0.025398643 | 0.015742082 |
| ENSG00000147679 | 0.030015995 | 0.037110181 | 0.037125674 | 0.031363331 |
| ENSG00000156471 | 0.025618056 | 0.030952781 | 0.03287058  | 0.029312639 |
| ENSG00000162458 | 0.015285249 | 0.023987744 | 0.025202911 | 0.014063605 |
| ENSG00000135698 | 0.037283761 | 0.038676052 | 0.038443734 | 0.02857532  |
| ENSG00000182545 | 0.018935145 | 0.027795445 | 0.028737414 | 0.019744382 |
| ENSG00000198650 | 0.015560663 | 0.025333981 | 0.025277029 | 0.015671423 |
| ENSG00000102054 | 0.02553676  | 0.029785374 | 0.027479896 | 0.022703899 |
| ENSG00000173113 | 0.021647627 | 0.027119054 | 0.027526546 | 0.016881691 |
| ENSG00000112096 | 0.03811613  | 0.036308033 | 0.035850663 | 0.025962008 |
| ENSG00000134121 | 0.063212473 | 0.053685111 | 0.042366462 | 0.051142546 |
| ENSG00000121542 | 0.027457669 | 0.031248425 | 0.030667561 | 0.022210005 |
| ENSG00000171291 | 0.068613829 | 0.06282407  | 0.043295104 | 0.055056687 |
| ENSG00000141642 | 0.030760136 | 0.038366849 | 0.040665413 | 0.035504021 |
| ENSG00000164898 | 0.036053531 | 0.037248092 | 0.035210018 | 0.031973793 |
| ENSG00000214575 | 0.051007779 | 0.028709761 | 0.031969078 | 0.037910026 |
| ENSG00000173262 | 0.057463994 | 0.055644864 | 0.065982083 | 0.059537264 |
| ENSG00000197496 | 0.021372297 | 0.027974181 | 0.028444983 | 0.028270255 |
| ENSG00000006282 | 0.064062965 | 0.049352819 | 0.037356823 | 0.062033968 |
| ENSG00000171116 | 0.017292949 | 0.027260828 | 0.026601958 | 0.018472315 |
| ENSG00000135318 | 0.104735344 | 0.088387264 | 0.084586937 | 0.085860841 |
| ENSG00000181036 | 0.016312341 | 0.025156626 | 0.02441298  | 0.015231268 |
| ENSG00000146070 | 0.021083701 | 0.025946725 | 0.025483509 | 0.015509107 |
| ENSG00000147140 | 0.01931992  | 0.026350125 | 0.02695619  | 0.016656077 |
| ENSG00000151239 | 0.028681792 | 0.037809435 | 0.041522894 | 0.031290948 |
| ENSG00000172724 | 0.050340491 | 0.072915462 | 0.033687195 | 0.024705853 |
| ENSG00000174407 | 0.018478808 | 0.025151143 | 0.026052193 | 0.016753074 |
| ENSG00000163736 | 0.014959361 | 0.025073636 | 0.025312933 | 0.015057815 |
| ENSG00000161243 | 0.085445351 | 0.068522076 | 0.052479462 | 0.057706241 |

|                 |             |             |             |             |
|-----------------|-------------|-------------|-------------|-------------|
| ENSG00000138050 | 0.033788081 | 0.040180738 | 0.035051963 | 0.024434519 |
| ENSG00000147475 | 0.019373765 | 0.027646581 | 0.025620878 | 0.016898347 |
| ENSG00000179057 | 0.02049801  | 0.025968581 | 0.025370194 | 0.016161098 |
| ENSG00000135114 | 0.042057485 | 0.050109428 | 0.047324048 | 0.040419862 |
| ENSG00000182318 | 0.021118249 | 0.027942473 | 0.028944332 | 0.019149788 |
| ENSG00000204531 | 0.017113171 | 0.025496414 | 0.026069332 | 0.016313518 |
| ENSG00000164619 | 0.015083632 | 0.025122746 | 0.026399595 | 0.016107865 |
| ENSG00000087087 | 0.033923676 | 0.032594564 | 0.032315824 | 0.031685881 |
| ENSG00000147488 | 0.016264069 | 0.026986078 | 0.024141306 | 0.015741192 |
| ENSG00000185100 | 0.016296898 | 0.027100627 | 0.025271112 | 0.016706666 |
| ENSG00000187601 | 0.030325091 | 0.036313035 | 0.037889246 | 0.026332272 |
| ENSG00000086548 | 0.016860398 | 0.02612706  | 0.024838334 | 0.015471906 |
| ENSG00000135763 | 0.041922377 | 0.041028353 | 0.046887002 | 0.032742829 |
| ENSG00000182272 | 0.015355336 | 0.025698309 | 0.02564701  | 0.015402278 |
| ENSG00000099999 | 0.020745037 | 0.027018542 | 0.027205077 | 0.02180431  |
| ENSG00000162399 | 0.017052157 | 0.027083219 | 0.026675437 | 0.016309679 |
| ENSG00000161395 | 0.036951082 | 0.038496319 | 0.038824516 | 0.032561928 |
| ENSG00000085563 | 0.045574703 | 0.043265127 | 0.036608795 | 0.049932982 |
| ENSG00000161091 | 0.029074945 | 0.035187227 | 0.033669922 | 0.028440752 |
| ENSG00000105467 | 0.017700018 | 0.025341897 | 0.025692187 | 0.01634468  |
| ENSG00000108518 | 0.015463075 | 0.024497497 | 0.023874351 | 0.016099392 |
| ENSG00000112029 | 0.048629945 | 0.038094745 | 0.03805334  | 0.035576415 |
| ENSG00000222040 | 0.021620213 | 0.026044349 | 0.028114462 | 0.016652095 |
| ENSG00000184481 | 0.019579811 | 0.028180418 | 0.026685531 | 0.02265524  |
| ENSG00000213619 | 0.024695862 | 0.028245604 | 0.027566655 | 0.019828149 |
| ENSG00000165935 | 0.016573095 | 0.027282545 | 0.025278207 | 0.019167109 |
| ENSG00000172967 | 0.015586141 | 0.024745428 | 0.024950941 | 0.015639568 |
| ENSG00000163467 | 0.018349106 | 0.025998584 | 0.024152015 | 0.016476257 |
| ENSG00000158220 | 0.015223206 | 0.025122004 | 0.024714768 | 0.016645574 |
| ENSG00000179097 | 0.017160582 | 0.026804339 | 0.025012326 | 0.017464065 |
| ENSG00000100836 | 0.029402417 | 0.034685375 | 0.031204229 | 0.022048897 |
| ENSG00000126756 | 0.027571883 | 0.031659627 | 0.028829938 | 0.028814279 |
| ENSG00000135454 | 0.024482659 | 0.026887998 | 0.027382411 | 0.021117282 |
| ENSG00000134453 | 0.028148038 | 0.033633353 | 0.031231586 | 0.026631616 |
| ENSG00000136274 | 0.015776745 | 0.026585256 | 0.02528356  | 0.014817567 |
| ENSG00000004455 | 0.039590697 | 0.030550823 | 0.031988716 | 0.028446037 |
| ENSG00000173947 | 0.030087202 | 0.032009771 | 0.027109841 | 0.023353355 |
| ENSG00000125462 | 0.066542146 | 0.050609391 | 0.047920062 | 0.058542464 |
| ENSG00000213420 | 0.030555129 | 0.03163964  | 0.027472376 | 0.023127877 |
| ENSG00000138964 | 0.03502325  | 0.037213203 | 0.040158201 | 0.04635853  |
| ENSG00000105136 | 0.023226759 | 0.035364628 | 0.032932086 | 0.022654427 |
| ENSG00000167632 | 0.029043367 | 0.036027888 | 0.034283847 | 0.028148579 |
| ENSG00000151466 | 0.040189046 | 0.04640645  | 0.034856343 | 0.03177256  |
| ENSG00000129480 | 0.029948502 | 0.030232938 | 0.032120663 | 0.026782731 |
| ENSG00000188993 | 0.016348753 | 0.024855718 | 0.02466578  | 0.014788723 |
| ENSG00000160883 | 0.019299185 | 0.026410534 | 0.026784328 | 0.019681843 |
| ENSG00000164076 | 0.018150768 | 0.025958209 | 0.027458295 | 0.017493581 |
| ENSG00000187461 | 0.057271177 | 0.040029417 | 0.045554618 | 0.057655638 |
| ENSG00000170209 | 0.016209691 | 0.024775496 | 0.025548041 | 0.015836366 |
| ENSG00000168079 | 0.015781954 | 0.024452294 | 0.025604845 | 0.014219252 |
| ENSG00000185950 | 0.017628651 | 0.02485247  | 0.024811474 | 0.015990403 |
| ENSG00000170091 | 0.016094979 | 0.025246594 | 0.024586787 | 0.014877118 |
| ENSG00000129071 | 0.025808415 | 0.031824287 | 0.030114487 | 0.022796132 |
| ENSG00000206549 | 0.020480593 | 0.02607564  | 0.024830098 | 0.028346763 |

|                 |             |             |             |             |
|-----------------|-------------|-------------|-------------|-------------|
| ENSG00000164329 | 0.024412564 | 0.032752098 | 0.029481938 | 0.022688475 |
| ENSG00000156983 | 0.030567763 | 0.044373473 | 0.053417738 | 0.03242282  |
| ENSG00000047578 | 0.023581991 | 0.031294332 | 0.028740727 | 0.022958808 |
| ENSG00000214046 | 0.028385826 | 0.034580486 | 0.032746352 | 0.024786677 |
| ENSG00000108669 | 0.023866362 | 0.031616952 | 0.029636227 | 0.022030702 |
| ENSG00000119912 | 0.035778442 | 0.041568551 | 0.034844671 | 0.032584228 |
| ENSG00000172053 | 0.020918995 | 0.027123031 | 0.026023562 | 0.020413003 |
| ENSG00000163132 | 0.123143186 | 0.09562806  | 0.106592934 | 0.112444942 |
| ENSG00000228083 | 0.020179796 | 0.025841095 | 0.026794674 | 0.01794086  |
| ENSG00000108759 | 0.016337694 | 0.024801402 | 0.024716218 | 0.014692563 |
| ENSG00000070371 | 0.015057207 | 0.02534428  | 0.025895588 | 0.015668256 |
| ENSG00000107014 | 0.049448244 | 0.041744018 | 0.041494536 | 0.04038023  |
| ENSG00000167393 | 0.045667386 | 0.049514128 | 0.04232489  | 0.04101576  |
| ENSG00000181562 | 0.017104014 | 0.025158084 | 0.02412428  | 0.016396906 |
| ENSG00000006047 | 0.019838959 | 0.028700428 | 0.027510121 | 0.017785034 |
| ENSG00000038945 | 0.016863845 | 0.024343664 | 0.026231779 | 0.015338598 |
| ENSG00000168813 | 0.016379939 | 0.025260309 | 0.025118044 | 0.015226431 |
| ENSG00000158079 | 0.015916618 | 0.025526267 | 0.024147415 | 0.015536826 |
| ENSG00000177239 | 0.014267269 | 0.024865634 | 0.025498271 | 0.014043178 |
| ENSG00000184012 | 0.018586403 | 0.024853921 | 0.024517914 | 0.015216529 |
| ENSG00000053372 | 0.025260984 | 0.029521237 | 0.033070119 | 0.021448972 |
| ENSG00000077063 | 0.017596465 | 0.026595945 | 0.026542542 | 0.016194361 |
| ENSG00000183813 | 0.016794174 | 0.025653872 | 0.02427687  | 0.014684903 |
| ENSG00000134443 | 0.019368114 | 0.025619037 | 0.024781084 | 0.017064988 |
| ENSG00000108691 | 0.019372151 | 0.026089809 | 0.025547823 | 0.018911945 |
| ENSG00000107147 | 0.014897623 | 0.024882764 | 0.025270615 | 0.015697444 |
| ENSG00000170619 | 0.01849838  | 0.02860483  | 0.025757482 | 0.020192668 |
| ENSG00000145990 | 0.048801686 | 0.043162422 | 0.042862278 | 0.038687536 |
| ENSG00000151632 | 0.06041463  | 0.027409985 | 0.025427508 | 0.015969395 |
| ENSG00000121057 | 0.026579149 | 0.028376052 | 0.027382864 | 0.022807409 |
| ENSG00000131368 | 0.036203603 | 0.037377876 | 0.033856478 | 0.029205243 |
| ENSG00000013573 | 0.038755773 | 0.041565319 | 0.036430614 | 0.029215267 |
| ENSG00000126259 | 0.017390402 | 0.026046724 | 0.025459173 | 0.016734384 |
| ENSG00000158578 | 0.015718227 | 0.024657079 | 0.025198745 | 0.014410628 |
| ENSG00000155890 | 0.01536823  | 0.025351006 | 0.023988696 | 0.014841031 |
| ENSG00000165194 | 0.016191236 | 0.025083735 | 0.026427123 | 0.015217039 |
| ENSG00000120963 | 0.020948601 | 0.027804866 | 0.028035101 | 0.018074646 |
| ENSG00000124226 | 0.020597845 | 0.028707814 | 0.028831221 | 0.018623525 |
| ENSG00000159527 | 0.015344686 | 0.024154079 | 0.025157845 | 0.014995039 |
| ENSG00000182400 | 0.028976589 | 0.033492333 | 0.033174118 | 0.02403581  |
| ENSG00000182162 | 0.036843417 | 0.036794571 | 0.033649367 | 0.026691224 |
| ENSG00000184677 | 0.034900141 | 0.040932126 | 0.035172616 | 0.029135382 |
| ENSG00000175928 | 0.016979647 | 0.026353656 | 0.024907712 | 0.016200967 |
| ENSG00000139197 | 0.029346438 | 0.032937603 | 0.031980515 | 0.021237488 |
| ENSG00000183814 | 0.047905192 | 0.048301016 | 0.036078692 | 0.042269672 |
| ENSG00000005238 | 0.02614988  | 0.034036257 | 0.030787147 | 0.025013172 |
| ENSG00000237110 | 0.016331794 | 0.026585627 | 0.025569253 | 0.01675613  |
| ENSG00000134107 | 0.05856395  | 0.035816194 | 0.044895629 | 0.047293261 |
| ENSG00000136824 | 0.050514208 | 0.051635987 | 0.036439904 | 0.05496954  |
| ENSG00000100122 | 0.015353455 | 0.025723194 | 0.026303743 | 0.015795746 |
| ENSG00000164603 | 0.043116253 | 0.050554021 | 0.039713056 | 0.041573342 |
| ENSG00000157600 | 0.039184802 | 0.039552711 | 0.037149863 | 0.034589828 |
| ENSG00000160746 | 0.081537798 | 0.049269754 | 0.039042526 | 0.06471909  |
| ENSG00000175544 | 0.014860196 | 0.024798781 | 0.024568625 | 0.015010194 |

|                 |             |             |             |             |
|-----------------|-------------|-------------|-------------|-------------|
| ENSG00000171791 | 0.058810916 | 0.061368754 | 0.052925442 | 0.043955552 |
| ENSG00000121691 | 0.041198464 | 0.044234405 | 0.037166797 | 0.026827577 |
| ENSG00000121101 | 0.015124507 | 0.025787856 | 0.024901811 | 0.013803444 |
| ENSG00000170540 | 0.023262291 | 0.033275257 | 0.030421318 | 0.02293433  |
| ENSG00000184983 | 0.031297677 | 0.034202367 | 0.035693992 | 0.032949181 |
| ENSG00000146918 | 0.047684242 | 0.052368757 | 0.036972945 | 0.036198284 |
| ENSG00000196526 | 0.018342523 | 0.026985881 | 0.026200035 | 0.015751361 |
| ENSG00000130522 | 0.029259673 | 0.038250139 | 0.04455492  | 0.028072387 |
| ENSG00000111605 | 0.03755756  | 0.037619946 | 0.038424052 | 0.039647176 |
| ENSG00000169851 | 0.016424924 | 0.024471125 | 0.025089949 | 0.014785433 |
| ENSG00000037280 | 0.049133364 | 0.042632032 | 0.037693132 | 0.047609869 |
| ENSG00000173918 | 0.016374491 | 0.025100741 | 0.02494401  | 0.016323088 |
| ENSG00000179361 | 0.030312973 | 0.032401942 | 0.03221859  | 0.025351279 |
| ENSG00000044524 | 0.018799937 | 0.026323477 | 0.025091387 | 0.016733138 |
| ENSG00000066279 | 0.047659524 | 0.040559468 | 0.03733531  | 0.036707396 |
| ENSG00000197142 | 0.017476738 | 0.028183632 | 0.027251054 | 0.015890974 |
| ENSG00000197965 | 0.038615148 | 0.043514737 | 0.039027843 | 0.032702934 |
| ENSG00000189077 | 0.060676791 | 0.051930548 | 0.07214227  | 0.059808045 |
| ENSG00000062725 | 0.035920075 | 0.038023204 | 0.034212557 | 0.040077793 |
| ENSG00000239306 | 0.031869577 | 0.03767049  | 0.033021871 | 0.025763273 |
| ENSG00000137142 | 0.017353606 | 0.025390941 | 0.025357055 | 0.01637759  |
| ENSG00000117697 | 0.028036944 | 0.034615635 | 0.033640604 | 0.027176942 |
| ENSG00000125815 | 0.015920302 | 0.025310709 | 0.025087393 | 0.015285441 |
| ENSG00000072163 | 0.052493449 | 0.042972286 | 0.044259171 | 0.047181735 |
| ENSG00000163064 | 0.015561305 | 0.024644369 | 0.024609568 | 0.016512587 |
| ENSG00000143702 | 0.033961951 | 0.047792764 | 0.043284593 | 0.046284297 |
| ENSG00000189221 | 0.017017813 | 0.024686227 | 0.025390681 | 0.01501046  |
| ENSG00000160785 | 0.030539347 | 0.038297813 | 0.03994811  | 0.035484754 |
| ENSG00000129988 | 0.016955097 | 0.025542213 | 0.025700037 | 0.016331278 |
| ENSG00000106560 | 0.042838435 | 0.044255052 | 0.041558736 | 0.03780565  |
| ENSG00000172215 | 0.014668674 | 0.025338238 | 0.024330279 | 0.015057167 |
| ENSG00000198728 | 0.017000884 | 0.02717066  | 0.028863611 | 0.015969553 |
| ENSG00000214113 | 0.039574323 | 0.035411315 | 0.037461635 | 0.033643429 |
| ENSG00000196236 | 0.022315574 | 0.027433998 | 0.029190522 | 0.019150983 |
| ENSG00000164535 | 0.034708498 | 0.038255436 | 0.036789256 | 0.028762406 |
| ENSG00000115616 | 0.023275892 | 0.030946775 | 0.025581792 | 0.0193344   |
| ENSG00000160209 | 0.0363009   | 0.034090556 | 0.038491888 | 0.032183887 |
| ENSG00000142405 | 0.016563778 | 0.024622767 | 0.024898013 | 0.015319213 |
| ENSG00000173153 | 0.029536642 | 0.037079644 | 0.034224499 | 0.028378961 |
| ENSG00000185686 | 0.024308705 | 0.029539565 | 0.026132928 | 0.062744217 |
| ENSG00000168958 | 0.027953972 | 0.034588773 | 0.030088117 | 0.025055106 |
| ENSG00000104723 | 0.030615226 | 0.025764448 | 0.026233219 | 0.019459699 |
| ENSG00000167779 | 0.040996039 | 0.032067869 | 0.029151029 | 0.021050527 |
| ENSG00000111667 | 0.017304852 | 0.026472095 | 0.025058469 | 0.01614028  |
| ENSG00000177697 | 0.070081245 | 0.050044381 | 0.049493426 | 0.050184005 |
| ENSG00000163362 | 0.116876937 | 0.082001457 | 0.080159205 | 0.085973469 |
| ENSG00000176692 | 0.014956025 | 0.024729914 | 0.025104336 | 0.014603039 |
| ENSG00000137656 | 0.033600966 | 0.035186416 | 0.035133779 | 0.031638852 |
| ENSG00000123500 | 0.017753252 | 0.026689361 | 0.025237019 | 0.016151209 |
| ENSG00000125482 | 0.027535076 | 0.033720382 | 0.029617975 | 0.020414362 |
| ENSG00000105339 | 0.052516013 | 0.04316853  | 0.03995572  | 0.045168231 |
| ENSG00000150526 | 0.014752573 | 0.025174566 | 0.025729424 | 0.015701385 |
| ENSG00000106617 | 0.036428865 | 0.033618261 | 0.032702074 | 0.027914054 |
| ENSG00000104848 | 0.015726314 | 0.025345192 | 0.025475426 | 0.015782807 |

|                 |             |             |             |             |
|-----------------|-------------|-------------|-------------|-------------|
| ENSG00000104691 | 0.03305515  | 0.036230056 | 0.034490246 | 0.027024871 |
| ENSG00000253313 | 0.015199562 | 0.025571772 | 0.025296867 | 0.016062981 |
| ENSG00000204681 | 0.015180408 | 0.026048489 | 0.024541641 | 0.015707918 |
| ENSG00000175274 | 0.017501144 | 0.025274304 | 0.024854547 | 0.015315154 |
| ENSG0000006634  | 0.036235679 | 0.03541478  | 0.037345609 | 0.036734813 |
| ENSG00000118017 | 0.015458532 | 0.024985746 | 0.025019776 | 0.015256606 |
| ENSG00000211454 | 0.017581715 | 0.024764846 | 0.026239393 | 0.018543464 |
| ENSG00000155304 | 0.03774019  | 0.036593377 | 0.036767194 | 0.042217384 |
| ENSG00000221983 | 0.043816496 | 0.046709334 | 0.048331838 | 0.020346347 |
| ENSG00000198478 | 0.026435027 | 0.026645102 | 0.026048249 | 0.019611392 |
| ENSG00000179454 | 0.041930238 | 0.038127192 | 0.038156003 | 0.044263832 |
| ENSG00000130475 | 0.033483945 | 0.034405776 | 0.034724828 | 0.036608775 |
| ENSG00000116981 | 0.016641857 | 0.02430243  | 0.025191788 | 0.016124613 |
| ENSG00000109390 | 0.036294562 | 0.034217212 | 0.035321637 | 0.035225999 |
| ENSG00000143450 | 0.019185308 | 0.028889254 | 0.026167486 | 0.018123592 |
| ENSG00000180016 | 0.015340883 | 0.02552255  | 0.025376695 | 0.015659683 |
| ENSG00000221878 | 0.018917118 | 0.026018755 | 0.028006493 | 0.020028744 |
| ENSG00000145536 | 0.015349903 | 0.024685633 | 0.024241745 | 0.016444108 |
| ENSG00000123454 | 0.019248085 | 0.029358359 | 0.025639763 | 0.018012637 |
| ENSG00000109063 | 0.029812889 | 0.031784444 | 0.029371584 | 0.020215909 |
| ENSG00000145349 | 0.050339594 | 0.051903949 | 0.044704535 | 0.050923674 |
| ENSG00000165023 | 0.0172583   | 0.027075094 | 0.025922069 | 0.017048597 |
| ENSG00000130962 | 0.01973625  | 0.031579435 | 0.027455172 | 0.018951995 |
| ENSG00000137573 | 0.070005029 | 0.024388606 | 0.025154103 | 0.015987507 |
| ENSG00000130054 | 0.016719115 | 0.025248564 | 0.024903805 | 0.016032804 |
| ENSG00000185567 | 0.019749963 | 0.026523282 | 0.026712268 | 0.019329069 |
| ENSG00000165071 | 0.020106588 | 0.044225864 | 0.040231581 | 0.027984338 |
| ENSG00000087253 | 0.015169616 | 0.025292929 | 0.024789838 | 0.015826407 |
| ENSG00000123091 | 0.021272021 | 0.0355405   | 0.027261406 | 0.036061801 |
| ENSG00000196873 | 0.030422071 | 0.032536875 | 0.029046195 | 0.024964645 |
| ENSG00000175325 | 0.015876337 | 0.025531257 | 0.025062274 | 0.015531255 |
| ENSG00000091527 | 0.025036469 | 0.03459503  | 0.033369197 | 0.021988042 |
| ENSG00000160961 | 0.017033809 | 0.025608585 | 0.026042503 | 0.016202411 |
| ENSG00000010626 | 0.051585932 | 0.044231459 | 0.056503698 | 0.044423568 |
| ENSG00000141655 | 0.061384894 | 0.054638736 | 0.054101459 | 0.053410983 |
| ENSG00000120256 | 0.017337957 | 0.025060313 | 0.025310552 | 0.015106662 |
| ENSG00000181617 | 0.015225127 | 0.024284931 | 0.02551961  | 0.014650292 |
| ENSG00000150760 | 0.014844282 | 0.026653267 | 0.024888887 | 0.015509677 |
| ENSG00000234545 | 0.03124592  | 0.035901932 | 0.029988155 | 0.030157805 |
| ENSG00000198805 | 0.045126529 | 0.040230006 | 0.039761181 | 0.0428102   |
| ENSG00000167377 | 0.029424901 | 0.035239297 | 0.030939526 | 0.021711379 |
| ENSG00000108055 | 0.029615504 | 0.035081398 | 0.030051195 | 0.024380599 |
| ENSG00000101444 | 0.025218174 | 0.029797843 | 0.028188847 | 0.024352572 |
| ENSG00000179564 | 0.017913305 | 0.024699324 | 0.024564453 | 0.015161304 |
| ENSG00000174343 | 0.015827734 | 0.025100935 | 0.02484061  | 0.016243496 |
| ENSG00000111671 | 0.050920063 | 0.055060392 | 0.045671631 | 0.048387174 |
| ENSG00000185038 | 0.014536448 | 0.025189771 | 0.024967511 | 0.014576305 |
| ENSG00000141295 | 0.037605029 | 0.03924612  | 0.036524972 | 0.03432528  |
| ENSG00000163380 | 0.015612998 | 0.02503065  | 0.024722762 | 0.016362599 |
| ENSG00000174792 | 0.019562799 | 0.024474781 | 0.025009775 | 0.015473441 |
| ENSG00000157764 | 0.031561745 | 0.036180984 | 0.033981934 | 0.027135156 |
| ENSG00000093072 | 0.014768609 | 0.024814311 | 0.025057226 | 0.014575828 |
| ENSG00000115641 | 0.085752577 | 0.049100711 | 0.041011118 | 0.054584803 |
| ENSG00000005955 | 0.025956186 | 0.037746501 | 0.035767759 | 0.025940986 |

|                |             |             |             |             |
|----------------|-------------|-------------|-------------|-------------|
| ENSG0000056097 | 0.021012625 | 0.028183575 | 0.030465797 | 0.021148356 |
| ENSG0000063244 | 0.026394337 | 0.033883028 | 0.028109534 | 0.02330691  |
| ENSG0000106853 | 0.089427792 | 0.090167372 | 0.073168154 | 0.083695249 |
| ENSG0000132376 | 0.01706966  | 0.024753833 | 0.024566508 | 0.015282252 |
| ENSG0000113273 | 0.026835097 | 0.0314328   | 0.026848609 | 0.022597908 |
| ENSG0000147168 | 0.030263873 | 0.032460271 | 0.034759318 | 0.031516081 |
| ENSG0000186231 | 0.018474808 | 0.026228433 | 0.025147561 | 0.016872812 |
| ENSG0000100012 | 0.015842428 | 0.02501869  | 0.02439156  | 0.014710214 |
| ENSG0000197172 | 0.018102484 | 0.025352579 | 0.026620137 | 0.016577709 |
| ENSG0000111276 | 0.035427234 | 0.04186352  | 0.039867363 | 0.039614858 |
| ENSG0000100604 | 0.048766903 | 0.033314611 | 0.03406062  | 0.034408339 |
| ENSG0000235750 | 0.043065814 | 0.046459325 | 0.037313133 | 0.041292047 |
| ENSG0000105383 | 0.060406721 | 0.042881992 | 0.054670171 | 0.061541928 |
| ENSG0000092067 | 0.015813816 | 0.026121969 | 0.025167128 | 0.017534702 |
| ENSG0000091513 | 0.015626571 | 0.026077934 | 0.024877094 | 0.017864134 |
| ENSG0000182793 | 0.015248008 | 0.024849966 | 0.024505492 | 0.015388905 |
| ENSG0000171819 | 0.015741369 | 0.024440085 | 0.024455278 | 0.015204727 |
| ENSG0000106688 | 0.043534071 | 0.051785071 | 0.04241181  | 0.041496247 |
| ENSG0000109220 | 0.025521635 | 0.034413712 | 0.034554133 | 0.027578237 |
| ENSG0000117174 | 0.031858277 | 0.035712177 | 0.034747973 | 0.031896829 |
| ENSG0000147588 | 0.016806424 | 0.025363908 | 0.025205018 | 0.016630856 |
| ENSG0000170264 | 0.049462627 | 0.05209385  | 0.04041988  | 0.042720289 |
| ENSG0000165102 | 0.02002407  | 0.025802457 | 0.025156675 | 0.016318499 |
| ENSG0000166133 | 0.029446284 | 0.034925268 | 0.037020739 | 0.028039891 |
| ENSG0000093009 | 0.051011815 | 0.045202568 | 0.037019168 | 0.039446976 |
| ENSG0000147234 | 0.015628481 | 0.025071346 | 0.024921626 | 0.014388282 |
| ENSG0000166741 | 0.016079745 | 0.0258461   | 0.025453726 | 0.015291487 |
| ENSG0000186792 | 0.016738026 | 0.0259094   | 0.025962592 | 0.016769235 |
| ENSG0000141279 | 0.027776486 | 0.036218603 | 0.028640663 | 0.023232393 |
| ENSG0000101365 | 0.016967256 | 0.026117741 | 0.025954319 | 0.015400514 |
| ENSG0000125207 | 0.018209098 | 0.028418565 | 0.025456908 | 0.017214068 |
| ENSG0000167695 | 0.045560869 | 0.040292645 | 0.036852005 | 0.031475624 |
| ENSG0000134245 | 0.017119376 | 0.024764327 | 0.025384424 | 0.015578701 |
| ENSG0000136205 | 0.07669059  | 0.071192411 | 0.058261464 | 0.061508566 |
| ENSG0000134256 | 0.020159226 | 0.026238107 | 0.025378112 | 0.017742597 |
| ENSG0000186980 | 0.017671124 | 0.025188642 | 0.027141988 | 0.017120735 |
| ENSG0000143190 | 0.035069675 | 0.033478049 | 0.030155862 | 0.026852557 |
| ENSG0000145604 | 0.026302946 | 0.03037454  | 0.028082884 | 0.019827101 |
| ENSG0000197557 | 0.03843107  | 0.051027644 | 0.034229473 | 0.028067939 |
| ENSG0000182902 | 0.016396227 | 0.025044882 | 0.025203394 | 0.014338172 |
| ENSG0000167081 | 0.055597348 | 0.046034866 | 0.037255362 | 0.052903061 |
| ENSG0000146006 | 0.016053238 | 0.024395794 | 0.024229912 | 0.014566875 |
| ENSG0000085831 | 0.06352222  | 0.053411725 | 0.044119333 | 0.050068958 |
| ENSG0000164825 | 0.015525133 | 0.025332049 | 0.025916441 | 0.015253805 |
| ENSG0000143401 | 0.041484546 | 0.045154923 | 0.036180656 | 0.057226732 |
| ENSG0000198818 | 0.024052844 | 0.031058758 | 0.027505989 | 0.022136478 |
| ENSG0000102898 | 0.027420033 | 0.031842193 | 0.030509905 | 0.025933921 |
| ENSG0000182993 | 0.036252504 | 0.041516114 | 0.036145892 | 0.031760569 |
| ENSG0000120658 | 0.025369669 | 0.028369168 | 0.02645145  | 0.017535047 |
| ENSG0000153531 | 0.021266863 | 0.025834426 | 0.025026864 | 0.017897468 |
| ENSG0000119673 | 0.038916768 | 0.041165644 | 0.031833083 | 0.038292302 |
| ENSG0000188343 | 0.049455869 | 0.0425078   | 0.045357755 | 0.055393271 |
| ENSG0000087077 | 0.040988862 | 0.031353336 | 0.031301371 | 0.028033322 |
| ENSG0000187730 | 0.01630377  | 0.025545782 | 0.025141396 | 0.015760379 |



|                 |             |             |             |             |
|-----------------|-------------|-------------|-------------|-------------|
| ENSG00000170929 | 0.014931616 | 0.024387468 | 0.024490207 | 0.015147903 |
| ENSG00000163026 | 0.027280141 | 0.029610739 | 0.030022182 | 0.024490768 |
| ENSG00000242108 | 0.016075589 | 0.026174619 | 0.024989711 | 0.016719292 |
| ENSG00000240344 | 0.040304674 | 0.030187946 | 0.029076975 | 0.045760627 |
| ENSG00000093144 | 0.029970167 | 0.034136622 | 0.030093009 | 0.027671777 |
| ENSG00000083844 | 0.03573845  | 0.039632082 | 0.039689941 | 0.029843783 |
| ENSG00000108270 | 0.02124142  | 0.027144485 | 0.028901064 | 0.017731618 |
| ENSG00000125841 | 0.042315657 | 0.035964596 | 0.035213874 | 0.037810003 |
| ENSG00000135436 | 0.025841082 | 0.026049577 | 0.026715967 | 0.016720051 |
| ENSG00000172037 | 0.015855863 | 0.023776439 | 0.025396525 | 0.015076332 |
| ENSG00000092850 | 0.014551495 | 0.023867577 | 0.024341009 | 0.01469708  |
| ENSG00000136052 | 0.032286052 | 0.038282846 | 0.039586436 | 0.031453742 |
| ENSG00000120087 | 0.056446545 | 0.043664832 | 0.041058278 | 0.042207649 |
| ENSG00000139719 | 0.029944832 | 0.036671379 | 0.03403055  | 0.033060484 |
| ENSG00000213927 | 0.015945008 | 0.025337496 | 0.025545662 | 0.01533503  |
| ENSG00000215305 | 0.02582593  | 0.03621522  | 0.031368072 | 0.029692146 |
| ENSG00000144583 | 0.016266017 | 0.024641748 | 0.025307232 | 0.0155573   |
| ENSG00000162542 | 0.040648684 | 0.039567744 | 0.037969281 | 0.035404033 |
| ENSG00000121318 | 0.016959285 | 0.02405266  | 0.025569414 | 0.016186354 |
| ENSG00000174628 | 0.048876442 | 0.039516281 | 0.033031148 | 0.036923321 |
| ENSG00000117500 | 0.02292788  | 0.030349553 | 0.033611909 | 0.028740867 |
| ENSG00000178691 | 0.0265108   | 0.033451225 | 0.028667012 | 0.026368863 |
| ENSG00000154065 | 0.105074262 | 0.073323148 | 0.064950276 | 0.076049267 |
| ENSG00000005194 | 0.032651464 | 0.037120834 | 0.036078501 | 0.034194841 |
| ENSG00000204439 | 0.029536891 | 0.037596661 | 0.036809004 | 0.026796436 |
| ENSG00000154127 | 0.032295535 | 0.026103635 | 0.031514778 | 0.028413155 |
| ENSG00000155906 | 0.027333018 | 0.036153014 | 0.028714993 | 0.022817519 |
| ENSG00000185842 | 0.016744718 | 0.025598643 | 0.024559512 | 0.014871005 |
| ENSG00000095139 | 0.021146792 | 0.029768437 | 0.029807234 | 0.022203502 |
| ENSG00000075891 | 0.015230198 | 0.025021819 | 0.025657218 | 0.015185801 |
| ENSG00000169710 | 0.029139806 | 0.032004167 | 0.026992042 | 0.024585379 |
| ENSG00000249115 | 0.021481592 | 0.027900298 | 0.028151917 | 0.01861074  |
| ENSG00000182405 | 0.028359482 | 0.036468372 | 0.030917342 | 0.027753738 |
| ENSG00000139626 | 0.055325154 | 0.043289206 | 0.041262777 | 0.058016987 |
| ENSG00000167964 | 0.02469604  | 0.026608468 | 0.028950835 | 0.026723035 |
| ENSG00000160218 | 0.032395025 | 0.035624207 | 0.038185957 | 0.032297591 |
| ENSG00000159593 | 0.029246742 | 0.033813318 | 0.031337331 | 0.022199608 |
| ENSG00000124215 | 0.016042848 | 0.025149445 | 0.024727039 | 0.015943404 |
| ENSG00000112304 | 0.027963614 | 0.030938128 | 0.028051012 | 0.027403138 |
| ENSG00000172179 | 0.119104161 | 0.026232163 | 0.025167779 | 0.0372419   |
| ENSG00000164761 | 0.125635612 | 0.079920418 | 0.042395251 | 0.05257761  |
| ENSG00000146122 | 0.1453242   | 0.081384099 | 0.052190222 | 0.073564381 |
| ENSG00000183682 | 0.016622237 | 0.024736954 | 0.024738845 | 0.014510686 |
| ENSG00000147119 | 0.039943055 | 0.042684966 | 0.034563151 | 0.033953998 |
| ENSG00000118729 | 0.016508411 | 0.024581873 | 0.024973393 | 0.015531783 |
| ENSG00000079482 | 0.01610798  | 0.025423569 | 0.02492372  | 0.015762781 |
| ENSG00000138175 | 0.035388447 | 0.037597823 | 0.033331721 | 0.025641096 |
| ENSG00000119917 | 0.061205304 | 0.069578599 | 0.06440174  | 0.075003803 |
| ENSG00000162975 | 0.015857528 | 0.024855646 | 0.025306093 | 0.014803753 |
| ENSG00000132823 | 0.02469027  | 0.033188573 | 0.033330965 | 0.025416728 |
| ENSG00000173482 | 0.03605037  | 0.027170031 | 0.026847952 | 0.022766168 |
| ENSG00000204019 | 0.015507562 | 0.025556068 | 0.025330159 | 0.042468565 |
| ENSG00000213030 | 0.016180542 | 0.025377692 | 0.025606406 | 0.016250405 |
| ENSG00000169045 | 0.031174817 | 0.040645265 | 0.035195813 | 0.027975221 |

|                 |             |             |             |             |
|-----------------|-------------|-------------|-------------|-------------|
| ENSG00000117682 | 0.03002504  | 0.035891265 | 0.039474106 | 0.030053481 |
| ENSG00000015568 | 0.03197301  | 0.035111956 | 0.029574077 | 0.023651426 |
| ENSG00000132207 | 0.037935086 | 0.036952132 | 0.036466069 | 0.027001344 |
| ENSG00000185254 | 0.01885058  | 0.026055393 | 0.025014365 | 0.016827769 |
| ENSG00000138193 | 0.017185475 | 0.025151616 | 0.024872142 | 0.016234814 |
| ENSG00000119950 | 0.015999235 | 0.024028115 | 0.025103369 | 0.01511471  |
| ENSG00000100994 | 0.031426133 | 0.030796143 | 0.032484468 | 0.027338458 |
| ENSG00000143633 | 0.026772175 | 0.030710946 | 0.031600046 | 0.025043782 |
| ENSG00000065882 | 0.04026856  | 0.038126897 | 0.042049301 | 0.036551585 |
| ENSG00000198131 | 0.034976787 | 0.040821257 | 0.049256998 | 0.043653431 |
| ENSG00000244486 | 0.018696275 | 0.025233133 | 0.026025266 | 0.017755878 |
| ENSG00000205221 | 0.018996856 | 0.03086208  | 0.028744934 | 0.019399913 |
| ENSG00000105173 | 0.035835998 | 0.034497147 | 0.037910476 | 0.030394136 |
| ENSG00000170180 | 0.016908208 | 0.025597923 | 0.02514049  | 0.016897049 |
| ENSG00000171136 | 0.014297255 | 0.024756101 | 0.02524771  | 0.014806785 |
| ENSG00000134198 | 0.01632417  | 0.025008474 | 0.02505928  | 0.015748327 |
| ENSG00000125398 | 0.081316219 | 0.06292248  | 0.056202448 | 0.07567329  |
| ENSG00000183317 | 0.016470434 | 0.025998293 | 0.026119865 | 0.016511584 |
| ENSG00000107020 | 0.033128474 | 0.035400202 | 0.032510061 | 0.029675826 |
| ENSG00000100156 | 0.016386317 | 0.024710056 | 0.025858951 | 0.014240101 |
| ENSG00000112619 | 0.01592259  | 0.024470259 | 0.02490534  | 0.016087213 |
| ENSG00000094804 | 0.02077775  | 0.027148798 | 0.025632688 | 0.018504936 |
| ENSG00000168615 | 0.028784973 | 0.032562907 | 0.031232133 | 0.020463729 |
| ENSG00000109101 | 0.016121194 | 0.025388379 | 0.025787043 | 0.015710044 |
| ENSG00000174516 | 0.018032288 | 0.0287927   | 0.025421875 | 0.018788715 |
| ENSG00000171103 | 0.031915348 | 0.033792082 | 0.028846648 | 0.023608648 |
| ENSG00000196935 | 0.027553842 | 0.031241525 | 0.029471561 | 0.021504315 |
| ENSG00000163359 | 0.015550557 | 0.02464161  | 0.024904264 | 0.015733705 |
| ENSG00000089154 | 0.027722492 | 0.033140399 | 0.033610106 | 0.022584801 |
| ENSG00000124610 | 0.016814718 | 0.024470611 | 0.024717536 | 0.015557599 |
| ENSG00000162944 | 0.016628195 | 0.025203209 | 0.024351107 | 0.016489966 |
| ENSG00000153802 | 0.016482507 | 0.024496958 | 0.02529453  | 0.014013792 |
| ENSG00000121552 | 0.099087878 | 0.104245036 | 0.059202934 | 0.055070494 |
| ENSG00000197448 | 0.02465364  | 0.029056111 | 0.028496623 | 0.023224587 |
| ENSG00000095370 | 0.031817803 | 0.030152409 | 0.038848481 | 0.038780071 |
| ENSG00000197601 | 0.036806024 | 0.038000501 | 0.039489082 | 0.0346715   |
| ENSG00000150244 | 0.036903559 | 0.026544263 | 0.035817794 | 0.020314378 |
| ENSG00000075624 | 0.013414368 | 0.023587025 | 0.023548045 | 0.013292624 |
| ENSG00000139291 | 0.042575312 | 0.03864438  | 0.044634015 | 0.042906991 |
| ENSG00000034152 | 0.018029942 | 0.029369488 | 0.026261257 | 0.021345484 |
| ENSG00000101670 | 0.090856294 | 0.069880199 | 0.068305321 | 0.071071979 |
| ENSG00000174640 | 0.030074024 | 0.026185304 | 0.029957074 | 0.018226859 |
| ENSG00000168026 | 0.027708058 | 0.034485398 | 0.030771795 | 0.033321302 |
| ENSG00000152784 | 0.017026776 | 0.025352569 | 0.025357551 | 0.014999491 |
| ENSG00000157450 | 0.022268791 | 0.031547493 | 0.029152557 | 0.021171092 |
| ENSG00000164122 | 0.016348728 | 0.025204168 | 0.024268657 | 0.015750842 |
| ENSG00000182871 | 0.022305508 | 0.031552904 | 0.028511392 | 0.023376615 |
| ENSG00000136732 | 0.033513541 | 0.029549462 | 0.031229559 | 0.024109176 |
| ENSG00000226979 | 0.048775287 | 0.041280514 | 0.0345472   | 0.043544197 |
| ENSG00000113648 | 0.030411477 | 0.031986825 | 0.038458664 | 0.033667358 |
| ENSG00000152402 | 0.016452531 | 0.023835754 | 0.025243177 | 0.014629843 |
| ENSG00000138778 | 0.048953494 | 0.043995894 | 0.037595313 | 0.03747261  |
| ENSG00000017373 | 0.015313285 | 0.025136451 | 0.025423078 | 0.013860926 |
| ENSG00000241973 | 0.016956866 | 0.024382554 | 0.024678824 | 0.015510547 |

|                 |             |             |             |             |
|-----------------|-------------|-------------|-------------|-------------|
| ENSG00000117475 | 0.034643475 | 0.035015222 | 0.037642522 | 0.04095229  |
| ENSG00000240583 | 0.016476886 | 0.026930512 | 0.025487817 | 0.015410932 |
| ENSG00000012124 | 0.031464471 | 0.038439348 | 0.034298795 | 0.03085004  |
| ENSG00000159082 | 0.016148514 | 0.024506041 | 0.024598776 | 0.014895885 |
| ENSG00000137393 | 0.025500886 | 0.025340656 | 0.024958505 | 0.017325395 |
| ENSG00000181234 | 0.017076794 | 0.026178217 | 0.025836875 | 0.017360444 |
| ENSG00000166592 | 0.059407405 | 0.052059924 | 0.048355006 | 0.054097349 |
| ENSG00000162390 | 0.024971472 | 0.027498389 | 0.026145456 | 0.023935003 |
| ENSG00000125726 | 0.027245132 | 0.02959473  | 0.033182629 | 0.028344084 |
| ENSG00000164543 | 0.021773895 | 0.031181241 | 0.027526103 | 0.017241622 |
| ENSG00000146276 | 0.017431576 | 0.024498698 | 0.024139301 | 0.016774393 |
| ENSG00000186818 | 0.014807381 | 0.024615116 | 0.024435954 | 0.015854049 |
| ENSG00000158792 | 0.036162588 | 0.044387593 | 0.046326761 | 0.029462243 |
| ENSG00000166246 | 0.018863355 | 0.025754432 | 0.025665033 | 0.017962825 |
| ENSG00000173269 | 0.020606534 | 0.026442363 | 0.025212832 | 0.016749539 |
| ENSG00000165272 | 0.023763578 | 0.025410145 | 0.027980879 | 0.017949011 |
| ENSG00000072506 | 0.033675304 | 0.0351155   | 0.030892655 | 0.02866245  |
| ENSG00000131941 | 0.076334185 | 0.050017762 | 0.049501774 | 0.057932094 |
| ENSG00000113328 | 0.033773251 | 0.045059991 | 0.036687444 | 0.039351926 |
| ENSG00000172640 | 0.015594813 | 0.024519584 | 0.024869198 | 0.016480037 |
| ENSG00000198924 | 0.032792595 | 0.040278395 | 0.03321111  | 0.028026017 |
| ENSG00000181830 | 0.028108852 | 0.031513094 | 0.040732498 | 0.025543115 |
| ENSG00000165807 | 0.015711393 | 0.026656346 | 0.025362168 | 0.015963236 |
| ENSG00000178467 | 0.044594794 | 0.039286752 | 0.037575534 | 0.037534339 |
| ENSG00000170941 | 0.017915038 | 0.027117017 | 0.027963442 | 0.01765083  |
| ENSG00000126550 | 0.01544969  | 0.024476585 | 0.024557468 | 0.014946308 |
| ENSG00000144597 | 0.020798616 | 0.02742921  | 0.026174033 | 0.017320228 |
| ENSG00000167601 | 0.019366949 | 0.028070204 | 0.026163858 | 0.016435805 |
| ENSG00000161513 | 0.04395149  | 0.043158114 | 0.042433063 | 0.034965471 |
| ENSG00000221829 | 0.041755659 | 0.039730461 | 0.030441882 | 0.030844159 |
| ENSG00000154265 | 0.037153531 | 0.035106229 | 0.034224556 | 0.031063464 |
| ENSG00000198718 | 0.036231468 | 0.040911894 | 0.035001573 | 0.035742075 |
| ENSG00000155052 | 0.016345869 | 0.025184783 | 0.025171876 | 0.014620515 |
| ENSG00000145428 | 0.018904613 | 0.024852152 | 0.025708828 | 0.015224598 |
| ENSG00000176083 | 0.016565555 | 0.025142588 | 0.025127717 | 0.016223159 |
| ENSG00000125170 | 0.06986115  | 0.056433741 | 0.045591222 | 0.058500282 |
| ENSG00000047644 | 0.068214474 | 0.060355914 | 0.049474582 | 0.094069168 |
| ENSG00000137074 | 0.033111527 | 0.036904812 | 0.030442696 | 0.023144043 |
| ENSG00000174697 | 0.015486463 | 0.024753978 | 0.024396432 | 0.015598733 |
| ENSG00000183111 | 0.019179825 | 0.028007893 | 0.025070008 | 0.017357648 |
| ENSG00000020577 | 0.027880005 | 0.031263265 | 0.030357581 | 0.026614663 |
| ENSG00000115183 | 0.088705304 | 0.064630963 | 0.048957822 | 0.064830484 |
| ENSG00000183648 | 0.018387095 | 0.027469863 | 0.025692681 | 0.018509025 |
| ENSG00000136856 | 0.041711103 | 0.040413195 | 0.042971366 | 0.035983858 |
| ENSG00000152578 | 0.016250282 | 0.024620971 | 0.025811027 | 0.016579903 |
| ENSG00000137288 | 0.03229323  | 0.034350252 | 0.03285568  | 0.030613312 |
| ENSG00000015133 | 0.031471627 | 0.035782825 | 0.03273827  | 0.023702653 |
| ENSG00000167085 | 0.036088569 | 0.0343032   | 0.036430731 | 0.030708337 |
| ENSG00000108256 | 0.032110986 | 0.039954876 | 0.043855348 | 0.032822211 |
| ENSG00000137285 | 0.129387626 | 0.126244903 | 0.110387245 | 0.112526948 |
| ENSG00000186049 | 0.01533067  | 0.024064942 | 0.024964375 | 0.016104994 |
| ENSG00000166734 | 0.027451493 | 0.034480143 | 0.03029696  | 0.026780283 |
| ENSG00000163281 | 0.028219392 | 0.035383527 | 0.032098514 | 0.029302007 |
| ENSG00000176894 | 0.035022704 | 0.035235038 | 0.039165357 | 0.032385968 |

|                 |             |             |             |             |
|-----------------|-------------|-------------|-------------|-------------|
| ENSG00000114107 | 0.049416525 | 0.041038666 | 0.044295881 | 0.033475595 |
| ENSG00000101452 | 0.03357839  | 0.037144646 | 0.033557809 | 0.029580755 |
| ENSG00000101951 | 0.016654172 | 0.025943081 | 0.02492009  | 0.016110433 |
| ENSG00000172935 | 0.017674384 | 0.025034462 | 0.024614369 | 0.015602754 |
| ENSG00000162078 | 0.089476749 | 0.06972619  | 0.068255871 | 0.082913582 |
| ENSG00000110079 | 0.017103319 | 0.02607824  | 0.024927237 | 0.016982976 |
| ENSG00000151065 | 0.025508393 | 0.031401129 | 0.027980695 | 0.02180051  |
| ENSG00000100129 | 0.017104425 | 0.026183759 | 0.026456674 | 0.018457005 |
| ENSG00000130177 | 0.028422337 | 0.033749277 | 0.033907539 | 0.020617549 |
| ENSG00000100314 | 0.017530619 | 0.026020779 | 0.025383472 | 0.017539924 |
| ENSG00000166507 | 0.032021841 | 0.036642859 | 0.036037876 | 0.027395185 |
| ENSG00000126254 | 0.020894435 | 0.02905537  | 0.032010086 | 0.024547387 |
| ENSG00000167654 | 0.017873407 | 0.025808321 | 0.025775894 | 0.015699341 |
| ENSG00000111371 | 0.02485206  | 0.03032531  | 0.031283513 | 0.022384917 |
| ENSG00000156313 | 0.058371602 | 0.059406527 | 0.060856816 | 0.062261368 |
| ENSG00000143157 | 0.028217682 | 0.033502147 | 0.034065434 | 0.025202234 |
| ENSG00000205531 | 0.024880232 | 0.030243121 | 0.029200144 | 0.021005    |
| ENSG00000168872 | 0.025600947 | 0.030482128 | 0.033472516 | 0.025595798 |
| ENSG00000108684 | 0.015920495 | 0.025882269 | 0.024700164 | 0.015867336 |
| ENSG00000169689 | 0.040544797 | 0.03608169  | 0.032130197 | 0.027898623 |
| ENSG00000134996 | 0.030803947 | 0.041343426 | 0.03668516  | 0.024626245 |
| ENSG00000111241 | 0.017039487 | 0.024549372 | 0.025697288 | 0.015202951 |
| ENSG00000159214 | 0.025224179 | 0.030027084 | 0.031390682 | 0.024052495 |
| ENSG00000135968 | 0.020563529 | 0.026818222 | 0.027641978 | 0.021000084 |
| ENSG00000020633 | 0.028551034 | 0.032034255 | 0.032645571 | 0.031614941 |
| ENSG00000114904 | 0.015396857 | 0.025773801 | 0.025509478 | 0.017165603 |
| ENSG00000104133 | 0.033934172 | 0.039984663 | 0.035265612 | 0.030192124 |
| ENSG00000038295 | 0.018520761 | 0.025891062 | 0.026017443 | 0.016764142 |
| ENSG00000168944 | 0.030240665 | 0.040680499 | 0.033053743 | 0.030221904 |
| ENSG00000186827 | 0.076057928 | 0.056885741 | 0.061882917 | 0.071041457 |
| ENSG00000165914 | 0.01795398  | 0.026696985 | 0.024665842 | 0.017232471 |
| ENSG00000106991 | 0.048744628 | 0.047069828 | 0.040646238 | 0.046233092 |
| ENSG00000196531 | 0.014407216 | 0.024680412 | 0.024563393 | 0.014709756 |
| ENSG00000167791 | 0.016381528 | 0.025233885 | 0.025701928 | 0.016266395 |
| ENSG00000163295 | 0.018435623 | 0.026416554 | 0.026386925 | 0.018575486 |
| ENSG00000014123 | 0.036320476 | 0.045241688 | 0.036007197 | 0.036139262 |
| ENSG00000204640 | 0.016009786 | 0.024520339 | 0.024733804 | 0.015173128 |
| ENSG00000101017 | 0.04419183  | 0.038059845 | 0.04231078  | 0.041053601 |
| ENSG00000111344 | 0.109499812 | 0.092210264 | 0.069238567 | 0.089223098 |
| ENSG00000166272 | 0.019569711 | 0.028928168 | 0.025944412 | 0.020505332 |
| ENSG00000177150 | 0.04010235  | 0.045069415 | 0.042318885 | 0.030750864 |
| ENSG00000164400 | 0.039742428 | 0.026499121 | 0.028626128 | 0.018785161 |
| ENSG00000204525 | 0.028926441 | 0.029361965 | 0.031097438 | 0.023265863 |
| ENSG00000204882 | 0.014863039 | 0.025053243 | 0.024670721 | 0.016421898 |
| ENSG00000172742 | 0.016469762 | 0.024916093 | 0.025126063 | 0.014376281 |
| ENSG00000078900 | 0.035146058 | 0.039463598 | 0.041066684 | 0.038489338 |
| ENSG00000137462 | 0.071982538 | 0.052323082 | 0.036921038 | 0.050557803 |
| ENSG00000126231 | 0.016670061 | 0.024818532 | 0.024403681 | 0.015847598 |
| ENSG00000187145 | 0.022714826 | 0.025723075 | 0.025676072 | 0.016762161 |
| ENSG00000130255 | 0.014411694 | 0.023802043 | 0.023979343 | 0.015934793 |
| ENSG00000158715 | 0.064606667 | 0.068123929 | 0.051938385 | 0.068571249 |
| ENSG00000112578 | 0.034714189 | 0.032036292 | 0.039152476 | 0.0311467   |
| ENSG00000175482 | 0.03718181  | 0.039642323 | 0.038882839 | 0.037100762 |
| ENSG00000100345 | 0.023133862 | 0.032973622 | 0.029257724 | 0.022860782 |

|                |             |             |             |             |
|----------------|-------------|-------------|-------------|-------------|
| ENSG0000092531 | 0.026407713 | 0.031682626 | 0.029315222 | 0.025035005 |
| ENSG0000180440 | 0.019351251 | 0.025556933 | 0.026154895 | 0.017558244 |
| ENSG0000004779 | 0.022305842 | 0.028162407 | 0.026677097 | 0.020174326 |
| ENSG0000109756 | 0.066041645 | 0.055581272 | 0.05418979  | 0.038943343 |
| ENSG0000105856 | 0.032011801 | 0.033714329 | 0.040873339 | 0.035482261 |
| ENSG0000063015 | 0.017164218 | 0.026628427 | 0.027250037 | 0.015680484 |
| ENSG0000198890 | 0.04138729  | 0.04108277  | 0.041337075 | 0.040251483 |
| ENSG0000170962 | 0.096158861 | 0.028935113 | 0.027817726 | 0.045840417 |
| ENSG0000185823 | 0.014072698 | 0.024135899 | 0.024045357 | 0.014690499 |
| ENSG0000069431 | 0.022220035 | 0.02558355  | 0.025834402 | 0.018644549 |
| ENSG0000121022 | 0.021862206 | 0.028949987 | 0.02751139  | 0.018895055 |
| ENSG0000120875 | 0.095198814 | 0.097415954 | 0.075942624 | 0.110611007 |
| ENSG0000134697 | 0.024860979 | 0.027251761 | 0.027914382 | 0.02429251  |
| ENSG0000156042 | 0.019747088 | 0.026394567 | 0.024850083 | 0.015322899 |
| ENSG0000167110 | 0.028050363 | 0.030383153 | 0.030769028 | 0.026842947 |
| ENSG0000154310 | 0.054073515 | 0.052053179 | 0.046846232 | 0.044633818 |
| ENSG0000178127 | 0.02088256  | 0.027876598 | 0.027086513 | 0.016138505 |
| ENSG0000119321 | 0.040260387 | 0.040815233 | 0.036815295 | 0.035195704 |
| ENSG0000139200 | 0.016734714 | 0.024676583 | 0.02444556  | 0.01668702  |
| ENSG0000165646 | 0.018629951 | 0.02889804  | 0.026678863 | 0.017792444 |
| ENSG0000135870 | 0.040831558 | 0.035349195 | 0.030374926 | 0.034225826 |
| ENSG0000167721 | 0.028198522 | 0.036545339 | 0.033950166 | 0.028708227 |
| ENSG0000164707 | 0.01724204  | 0.024593963 | 0.026103435 | 0.016443365 |
| ENSG0000134183 | 0.021817144 | 0.027625457 | 0.024950304 | 0.018404546 |
| ENSG0000081760 | 0.018145385 | 0.025752111 | 0.027523068 | 0.018445088 |
| ENSG0000204227 | 0.02478711  | 0.030429855 | 0.03143582  | 0.021222766 |
| ENSG0000186807 | 0.088052267 | 0.034338586 | 0.036133961 | 0.074815648 |
| ENSG0000071677 | 0.015756171 | 0.024666523 | 0.024863854 | 0.015847917 |
| ENSG0000172340 | 0.038224689 | 0.042524637 | 0.041496941 | 0.040841221 |
| ENSG0000164853 | 0.015187172 | 0.025335121 | 0.024816701 | 0.014662537 |
| ENSG0000206072 | 0.017534213 | 0.02650025  | 0.025663565 | 0.017592703 |
| ENSG0000204498 | 0.024200096 | 0.030448022 | 0.031427207 | 0.032594412 |
| ENSG0000130066 | 0.047598152 | 0.046493821 | 0.043611062 | 0.041891718 |
| ENSG0000156858 | 0.022961826 | 0.028746356 | 0.033654026 | 0.024214332 |
| ENSG0000101310 | 0.023794597 | 0.02572209  | 0.026774084 | 0.017656107 |
| ENSG0000103978 | 0.031389778 | 0.034596711 | 0.041179484 | 0.032176661 |
| ENSG0000175556 | 0.022108358 | 0.027234017 | 0.026145751 | 0.017596003 |
| ENSG0000172031 | 0.015184687 | 0.024407747 | 0.025325047 | 0.014631405 |
| ENSG0000126803 | 0.02549756  | 0.030248922 | 0.025611248 | 0.023252088 |
| ENSG0000171295 | 0.033258709 | 0.032262672 | 0.035590162 | 0.033565195 |
| ENSG0000040199 | 0.033319608 | 0.041947493 | 0.036514369 | 0.030239965 |
| ENSG0000133059 | 0.019763021 | 0.027464622 | 0.025991661 | 0.018479337 |
| ENSG0000114942 | 0.034517837 | 0.030684129 | 0.030017829 | 0.032750013 |
| ENSG0000040633 | 0.029154796 | 0.033330234 | 0.036903179 | 0.028954745 |
| ENSG0000105640 | 0.013807346 | 0.023874962 | 0.024378858 | 0.014673273 |
| ENSG0000174948 | 0.015733544 | 0.024827716 | 0.024697229 | 0.015271703 |
| ENSG0000187037 | 0.017024906 | 0.026119402 | 0.024616384 | 0.01453906  |
| ENSG0000100373 | 0.016551757 | 0.024326745 | 0.025437358 | 0.016407022 |
| ENSG0000147570 | 0.035774357 | 0.076823011 | 0.042919622 | 0.068252798 |
| ENSG0000109475 | 0.044615598 | 0.042596    | 0.03566812  | 0.031522747 |
| ENSG0000106123 | 0.015793805 | 0.026232867 | 0.024967165 | 0.014923789 |
| ENSG0000204856 | 0.032497457 | 0.036003423 | 0.030121355 | 0.026072305 |
| ENSG0000168118 | 0.045010908 | 0.042424529 | 0.037459093 | 0.033078961 |
| ENSG0000106809 | 0.015296552 | 0.024655219 | 0.024563146 | 0.015169172 |

|                 |             |             |             |             |
|-----------------|-------------|-------------|-------------|-------------|
| ENSG0000071189  | 0.030986999 | 0.041824244 | 0.038256392 | 0.024383129 |
| ENSG00000134574 | 0.030266356 | 0.03600755  | 0.03604185  | 0.03112244  |
| ENSG00000136518 | 0.035981884 | 0.038587797 | 0.031179835 | 0.030313764 |
| ENSG00000175567 | 0.043397171 | 0.034279329 | 0.037297978 | 0.031017648 |
| ENSG00000162664 | 0.023433203 | 0.026749036 | 0.027912056 | 0.022103301 |
| ENSG00000116014 | 0.076973703 | 0.071856944 | 0.065606033 | 0.069193949 |
| ENSG00000162896 | 0.120681176 | 0.091613934 | 0.10705028  | 0.120737965 |
| ENSG00000147255 | 0.043210542 | 0.02695756  | 0.026598063 | 0.019206013 |
| ENSG00000104725 | 0.01711789  | 0.024948626 | 0.02529034  | 0.01481817  |
| ENSG00000108950 | 0.015426339 | 0.024313046 | 0.024256029 | 0.013861592 |
| ENSG00000169126 | 0.014792366 | 0.024570643 | 0.024645013 | 0.01480068  |
| ENSG00000197380 | 0.023090723 | 0.028194032 | 0.025633088 | 0.022608641 |
| ENSG00000188092 | 0.028923514 | 0.031245856 | 0.036676488 | 0.023021223 |
| ENSG00000122705 | 0.016347184 | 0.025828403 | 0.025317771 | 0.014322305 |
| ENSG00000112655 | 0.040308618 | 0.03867999  | 0.026766478 | 0.022818909 |
| ENSG00000249437 | 0.021729983 | 0.02990583  | 0.028902567 | 0.025090588 |
| ENSG00000198252 | 0.025745226 | 0.036672013 | 0.028961004 | 0.019869997 |
| ENSG00000213085 | 0.029929114 | 0.032797899 | 0.032500971 | 0.056925843 |
| ENSG00000174903 | 0.025202042 | 0.02964941  | 0.033530547 | 0.024432437 |
| ENSG00000128656 | 0.017095185 | 0.024868164 | 0.025771315 | 0.01639486  |
| ENSG00000065325 | 0.01625462  | 0.025353357 | 0.024361252 | 0.015153227 |
| ENSG00000205436 | 0.017296399 | 0.025553934 | 0.02459302  | 0.013818406 |
| ENSG00000113494 | 0.034375238 | 0.034979069 | 0.027679418 | 0.02746519  |
| ENSG00000135297 | 0.028757086 | 0.033863902 | 0.031983334 | 0.021824954 |
| ENSG00000076604 | 0.04023609  | 0.05537892  | 0.05721221  | 0.045371568 |
| ENSG00000137601 | 0.035095185 | 0.041231448 | 0.032608776 | 0.030032838 |
| ENSG00000172270 | 0.047196937 | 0.037404736 | 0.037665554 | 0.037878699 |
| ENSG00000212128 | 0.016075467 | 0.024172658 | 0.024640559 | 0.015318591 |
| ENSG00000101150 | 0.02349557  | 0.030385984 | 0.030760993 | 0.023208157 |
| ENSG00000173614 | 0.035138631 | 0.033813172 | 0.034322319 | 0.040462593 |
| ENSG00000134548 | 0.021391666 | 0.038412469 | 0.036899668 | 0.023173879 |
| ENSG00000109956 | 0.017459178 | 0.02818334  | 0.026268532 | 0.024036324 |
| ENSG00000140287 | 0.017278282 | 0.026734625 | 0.025356245 | 0.017148368 |
| ENSG00000154330 | 0.016462708 | 0.025296703 | 0.025490948 | 0.016129709 |
| ENSG00000071051 | 0.024046125 | 0.032146141 | 0.030300884 | 0.02274763  |
| ENSG00000122852 | 0.017188899 | 0.024880058 | 0.025771269 | 0.015027927 |
| ENSG00000101955 | 0.023110353 | 0.033780947 | 0.028312603 | 0.021568805 |
| ENSG00000176953 | 0.028696072 | 0.030823063 | 0.032824508 | 0.029035765 |
| ENSG00000185000 | 0.023821268 | 0.027280746 | 0.027500529 | 0.022365111 |
| ENSG00000183726 | 0.029645257 | 0.03505842  | 0.033929875 | 0.033356731 |
| ENSG00000170776 | 0.036326193 | 0.037891608 | 0.034610873 | 0.033856738 |
| ENSG00000004897 | 0.025105096 | 0.034482937 | 0.032410229 | 0.024787219 |
| ENSG00000183186 | 0.017587929 | 0.024796596 | 0.025044538 | 0.016585994 |
| ENSG00000025800 | 0.026432599 | 0.02942535  | 0.029842047 | 0.021614206 |
| ENSG00000165609 | 0.023771965 | 0.031041521 | 0.027730682 | 0.020639207 |
| ENSG00000141873 | 0.029269108 | 0.033562883 | 0.034029129 | 0.032559442 |
| ENSG00000147592 | 0.038180639 | 0.036891727 | 0.031959329 | 0.028932506 |
| ENSG00000167065 | 0.026835443 | 0.030212513 | 0.027564856 | 0.023836379 |
| ENSG00000113532 | 0.05581066  | 0.059272655 | 0.048101594 | 0.044755163 |
| ENSG00000168634 | 0.015759302 | 0.024925242 | 0.025272696 | 0.015100826 |
| ENSG00000169330 | 0.03309761  | 0.029164069 | 0.029662493 | 0.033138774 |
| ENSG00000158683 | 0.015918875 | 0.026382028 | 0.024862887 | 0.015439815 |
| ENSG00000205937 | 0.017804178 | 0.025162108 | 0.025009926 | 0.016883189 |
| ENSG00000117868 | 0.020454435 | 0.026047078 | 0.026163195 | 0.01655395  |

|                 |             |             |             |             |
|-----------------|-------------|-------------|-------------|-------------|
| ENSG00000105409 | 0.060165411 | 0.047415107 | 0.039733645 | 0.040972441 |
| ENSG00000184992 | 0.037824052 | 0.044711215 | 0.04073733  | 0.033353571 |
| ENSG00000146242 | 0.137308397 | 0.080478837 | 0.063873871 | 0.105425984 |
| ENSG00000021762 | 0.015110333 | 0.025630674 | 0.025091351 | 0.016467773 |
| ENSG00000196199 | 0.030044053 | 0.03687236  | 0.033349817 | 0.022968552 |
| ENSG00000117010 | 0.033254714 | 0.035927942 | 0.036844246 | 0.029064893 |
| ENSG00000183979 | 0.021032912 | 0.026252545 | 0.024762113 | 0.018536505 |
| ENSG00000229544 | 0.016461838 | 0.02511454  | 0.024857814 | 0.015847916 |
| ENSG00000122299 | 0.026162097 | 0.031090861 | 0.039912258 | 0.026583027 |
| ENSG00000183791 | 0.015334363 | 0.025055047 | 0.024495039 | 0.014751732 |
| ENSG00000104164 | 0.043976317 | 0.041252028 | 0.038244967 | 0.057201464 |
| ENSG00000172188 | 0.01888453  | 0.025329495 | 0.026518197 | 0.018094811 |
| ENSG00000167920 | 0.033437874 | 0.035936514 | 0.033594936 | 0.029409637 |
| ENSG00000143320 | 0.017736568 | 0.025160657 | 0.025078325 | 0.015820766 |
| ENSG00000143951 | 0.027781452 | 0.035089359 | 0.027606231 | 0.028267413 |
| ENSG00000101493 | 0.052487782 | 0.047829315 | 0.043794833 | 0.045375087 |
| ENSG00000139684 | 0.021146797 | 0.028088957 | 0.02775705  | 0.020596717 |
| ENSG00000114353 | 0.023150491 | 0.027679204 | 0.028147998 | 0.018949517 |
| ENSG00000182348 | 0.016071344 | 0.024812281 | 0.024910143 | 0.016356004 |
| ENSG00000139579 | 0.030938722 | 0.034396366 | 0.028586551 | 0.025113373 |
| ENSG00000187391 | 0.017270116 | 0.026825429 | 0.027339437 | 0.017792315 |
| ENSG00000148803 | 0.032032992 | 0.034376564 | 0.030492417 | 0.034233379 |
| ENSG00000113205 | 0.0171874   | 0.026403586 | 0.025345006 | 0.016086729 |
| ENSG00000184203 | 0.031417563 | 0.036922797 | 0.036987466 | 0.02451318  |
| ENSG00000117479 | 0.05709633  | 0.041562436 | 0.039724816 | 0.037595156 |
| ENSG00000184363 | 0.016396317 | 0.026509149 | 0.027545206 | 0.015949262 |
| ENSG00000153086 | 0.015552871 | 0.025134968 | 0.02479555  | 0.014080468 |
| ENSG00000172500 | 0.02956175  | 0.033357365 | 0.029260515 | 0.027642411 |
| ENSG00000159322 | 0.024497029 | 0.031134611 | 0.030828312 | 0.022374093 |
| ENSG00000168899 | 0.04369771  | 0.039995895 | 0.041001279 | 0.036797702 |
| ENSG00000128510 | 0.064370905 | 0.066930707 | 0.054714939 | 0.064411795 |
| ENSG00000182187 | 0.017276045 | 0.023994856 | 0.024566357 | 0.015108048 |
| ENSG00000145384 | 0.017204642 | 0.026148815 | 0.027563908 | 0.017187124 |
| ENSG00000111704 | 0.016787781 | 0.025408926 | 0.025753515 | 0.018916255 |
| ENSG00000091129 | 0.153218751 | 0.07099608  | 0.03394775  | 0.056833789 |
| ENSG00000099785 | 0.031140717 | 0.036071756 | 0.035514047 | 0.030331756 |
| ENSG00000147432 | 0.018187327 | 0.026746815 | 0.026496303 | 0.017835591 |
| ENSG00000132005 | 0.025884835 | 0.036633942 | 0.032971894 | 0.028526887 |
| ENSG00000128254 | 0.015288537 | 0.024024515 | 0.025288688 | 0.01499516  |
| ENSG00000196793 | 0.054045652 | 0.042182138 | 0.037011371 | 0.034365459 |
| ENSG00000129518 | 0.025390448 | 0.038467229 | 0.032562098 | 0.02603     |
| ENSG00000145982 | 0.044976194 | 0.033238215 | 0.034167768 | 0.037047597 |
| ENSG00000140400 | 0.02492764  | 0.033275381 | 0.035332656 | 0.029586061 |
| ENSG00000004838 | 0.024663822 | 0.028793649 | 0.032168952 | 0.024824581 |
| ENSG00000164796 | 0.017378904 | 0.027668434 | 0.027444466 | 0.016700265 |
| ENSG00000146674 | 0.147332306 | 0.084254346 | 0.029901061 | 0.063040238 |
| ENSG00000138356 | 0.018266787 | 0.026953591 | 0.025255956 | 0.017990047 |
| ENSG00000121879 | 0.030381096 | 0.03703118  | 0.037893547 | 0.028262186 |
| ENSG00000141753 | 0.088691018 | 0.060079232 | 0.060506915 | 0.066017005 |
| ENSG00000151414 | 0.016411731 | 0.026029813 | 0.025825531 | 0.016382783 |
| ENSG00000065970 | 0.02705656  | 0.03054541  | 0.031727189 | 0.022089299 |
| ENSG00000135185 | 0.026807029 | 0.031356381 | 0.032732885 | 0.021600425 |
| ENSG00000177842 | 0.037301126 | 0.038730844 | 0.038019157 | 0.043895089 |
| ENSG00000185414 | 0.029791625 | 0.040097607 | 0.03225259  | 0.026314907 |

|                 |             |             |             |             |
|-----------------|-------------|-------------|-------------|-------------|
| ENSG00000170011 | 0.085225336 | 0.044375977 | 0.042081528 | 0.042920862 |
| ENSG00000187033 | 0.037566539 | 0.041033486 | 0.031946448 | 0.036457797 |
| ENSG00000168000 | 0.040716875 | 0.035868785 | 0.034422003 | 0.034242014 |
| ENSG00000166920 | 0.015183689 | 0.024687728 | 0.023910888 | 0.015153865 |
| ENSG00000079337 | 0.019549382 | 0.02680357  | 0.026376146 | 0.016076933 |
| ENSG00000185437 | 0.031743521 | 0.032054252 | 0.029159528 | 0.026732918 |
| ENSG00000108242 | 0.016663105 | 0.02463333  | 0.02464324  | 0.014475885 |
| ENSG00000125753 | 0.020839936 | 0.030877461 | 0.029745605 | 0.022783019 |
| ENSG00000167588 | 0.018195003 | 0.026873056 | 0.025860382 | 0.01667778  |
| ENSG00000173950 | 0.043189082 | 0.041163474 | 0.036162429 | 0.042945719 |
| ENSG00000106927 | 0.016612102 | 0.024842149 | 0.025283946 | 0.015566591 |
| ENSG00000141391 | 0.019079429 | 0.026282669 | 0.025597229 | 0.017397979 |
| ENSG00000114279 | 0.017498488 | 0.026544962 | 0.025890612 | 0.014780967 |
| ENSG00000157851 | 0.015954412 | 0.025325527 | 0.024645059 | 0.016409083 |
| ENSG00000081014 | 0.021555932 | 0.027577602 | 0.026783339 | 0.020323654 |
| ENSG00000100473 | 0.063153267 | 0.060119847 | 0.052582419 | 0.053488144 |
| ENSG00000006788 | 0.016531167 | 0.02498554  | 0.025471834 | 0.015548446 |
| ENSG00000108510 | 0.029626666 | 0.033086297 | 0.03712386  | 0.024337354 |
| ENSG00000163428 | 0.03961528  | 0.035479287 | 0.03719962  | 0.029939673 |
| ENSG00000167286 | 0.044387579 | 0.026606859 | 0.026652808 | 0.095866741 |
| ENSG00000152580 | 0.014730908 | 0.025167896 | 0.024709953 | 0.014676961 |
| ENSG00000153944 | 0.051440626 | 0.03577443  | 0.033034618 | 0.037185977 |
| ENSG00000130304 | 0.022948372 | 0.028368113 | 0.028203571 | 0.021819044 |
| ENSG00000170222 | 0.025701841 | 0.032039738 | 0.030555709 | 0.021792577 |
| ENSG00000161664 | 0.060245063 | 0.049476865 | 0.047780226 | 0.087116769 |
| ENSG00000182230 | 0.015076104 | 0.025732709 | 0.025950711 | 0.019661526 |
| ENSG00000178449 | 0.021795501 | 0.027823945 | 0.029723248 | 0.024344387 |
| ENSG00000162753 | 0.018194906 | 0.030392395 | 0.027891858 | 0.021253313 |
| ENSG00000134871 | 0.0365897   | 0.035983025 | 0.026401752 | 0.022031835 |
| ENSG00000132305 | 0.028136667 | 0.033504577 | 0.031454938 | 0.020649129 |
| ENSG00000187801 | 0.039876033 | 0.040012865 | 0.04526264  | 0.037705071 |
| ENSG00000241468 | 0.030286383 | 0.032505064 | 0.028646058 | 0.026140092 |
| ENSG00000161649 | 0.019679209 | 0.028186471 | 0.025562555 | 0.020785997 |
| ENSG00000144451 | 0.031353922 | 0.02852727  | 0.027903154 | 0.021230573 |
| ENSG00000244122 | 0.016657472 | 0.02545122  | 0.025045022 | 0.016312798 |
| ENSG00000204628 | 0.015343904 | 0.024280498 | 0.025463017 | 0.017400085 |
| ENSG00000171643 | 0.023123278 | 0.026184308 | 0.024712343 | 0.015668395 |
| ENSG00000033867 | 0.050009454 | 0.03983724  | 0.034290344 | 0.033103387 |
| ENSG00000185385 | 0.01530777  | 0.024689881 | 0.02412485  | 0.015148724 |
| ENSG00000184368 | 0.120793993 | 0.092538412 | 0.065173299 | 0.108195531 |
| ENSG00000204518 | 0.015226483 | 0.024571063 | 0.025200204 | 0.01492736  |
| ENSG00000167236 | 0.027879401 | 0.025284013 | 0.026448371 | 0.022664449 |
| ENSG00000089685 | 0.045584609 | 0.034022539 | 0.04068601  | 0.036447518 |
| ENSG00000141933 | 0.031529199 | 0.035261297 | 0.035171958 | 0.029305852 |
| ENSG00000023572 | 0.023208555 | 0.029508686 | 0.02512762  | 0.019125476 |
| ENSG00000175137 | 0.026315901 | 0.027898809 | 0.029701425 | 0.022806194 |
| ENSG00000151500 | 0.034255019 | 0.037180816 | 0.031135338 | 0.027731656 |
| ENSG00000144161 | 0.031713884 | 0.032146277 | 0.038411684 | 0.028787282 |
| ENSG00000164181 | 0.047739545 | 0.051565529 | 0.054911306 | 0.046894676 |
| ENSG00000100908 | 0.030042215 | 0.030676248 | 0.033369818 | 0.027163677 |
| ENSG00000119685 | 0.018620358 | 0.026151425 | 0.026349476 | 0.017676263 |
| ENSG00000147364 | 0.017585683 | 0.027098645 | 0.026327381 | 0.017120702 |
| ENSG00000204560 | 0.022160695 | 0.03177968  | 0.029264573 | 0.020627538 |
| ENSG00000174586 | 0.017776143 | 0.025414547 | 0.025848264 | 0.017078241 |



|                 |             |             |             |             |
|-----------------|-------------|-------------|-------------|-------------|
| ENSG00000150459 | 0.036820551 | 0.037932506 | 0.032102286 | 0.026654058 |
| ENSG00000213722 | 0.028268813 | 0.035539816 | 0.034006351 | 0.028342002 |
| ENSG00000105486 | 0.036165121 | 0.032772568 | 0.033370792 | 0.026125412 |
| ENSG00000148926 | 0.144476754 | 0.119087782 | 0.139406768 | 0.138717717 |
| ENSG00000248098 | 0.035310665 | 0.034675881 | 0.033794155 | 0.02879948  |
| ENSG00000015285 | 0.021437444 | 0.027335862 | 0.02831236  | 0.021797507 |
| ENSG00000114125 | 0.022488236 | 0.029644287 | 0.028235907 | 0.020415947 |
| ENSG00000118596 | 0.024709735 | 0.033112539 | 0.029795039 | 0.020983695 |
| ENSG00000115902 | 0.04763009  | 0.045317152 | 0.052462871 | 0.050869515 |
| ENSG00000135604 | 0.035820695 | 0.042393901 | 0.044925465 | 0.035052432 |
| ENSG00000119471 | 0.028920821 | 0.036497497 | 0.036828565 | 0.035302742 |
| ENSG00000182606 | 0.036823062 | 0.040987692 | 0.036823674 | 0.032000282 |
| ENSG00000114487 | 0.019093919 | 0.025784093 | 0.027803388 | 0.019941316 |
| ENSG00000167565 | 0.016258093 | 0.027507342 | 0.025518304 | 0.017004032 |
| ENSG00000186075 | 0.016204703 | 0.024597757 | 0.024898051 | 0.014565947 |
| ENSG00000124596 | 0.031182059 | 0.032413263 | 0.028596276 | 0.020009282 |
| ENSG00000174206 | 0.03028537  | 0.031264143 | 0.034845243 | 0.019173361 |
| ENSG00000204386 | 0.030018048 | 0.031923601 | 0.036240685 | 0.028054931 |
| ENSG00000136868 | 0.041765605 | 0.041035769 | 0.036599434 | 0.034789255 |
| ENSG00000146733 | 0.040192523 | 0.036529635 | 0.033866605 | 0.040142537 |
| ENSG00000166783 | 0.01926933  | 0.028873032 | 0.026694882 | 0.019248872 |
| ENSG00000107651 | 0.031783002 | 0.037677312 | 0.031592082 | 0.027989134 |
| ENSG00000100249 | 0.016424071 | 0.025609878 | 0.027248913 | 0.017568555 |
| ENSG00000172977 | 0.014822159 | 0.024639142 | 0.024474095 | 0.015319705 |
| ENSG00000022355 | 0.016563782 | 0.024975851 | 0.02471782  | 0.015553505 |
| ENSG00000184374 | 0.016324959 | 0.026084231 | 0.025416429 | 0.015203516 |
| ENSG00000055130 | 0.024784356 | 0.031463358 | 0.030928415 | 0.019448367 |
| ENSG00000169551 | 0.015116484 | 0.024206711 | 0.024361678 | 0.014781261 |
| ENSG00000119383 | 0.038642384 | 0.035181143 | 0.03445255  | 0.033872914 |
| ENSG00000131848 | 0.030536087 | 0.034894652 | 0.042034297 | 0.03602496  |
| ENSG00000188818 | 0.016811724 | 0.02545345  | 0.024931106 | 0.017217456 |
| ENSG00000187244 | 0.015742197 | 0.02475329  | 0.023890719 | 0.016297    |
| ENSG00000172297 | 0.013439364 | 0.023893802 | 0.023547794 | 0.01298002  |
| ENSG00000148396 | 0.019631219 | 0.029349658 | 0.036356778 | 0.022453848 |
| ENSG00000182271 | 0.015625963 | 0.026524951 | 0.02521593  | 0.015593123 |
| ENSG00000162290 | 0.030334456 | 0.037150017 | 0.034963188 | 0.029476493 |
| ENSG00000119280 | 0.037856889 | 0.032715296 | 0.03524716  | 0.029604846 |
| ENSG00000175899 | 0.044602836 | 0.06292713  | 0.036627087 | 0.052888546 |
| ENSG00000101161 | 0.048648994 | 0.037845592 | 0.037300859 | 0.045605194 |
| ENSG00000126950 | 0.016328284 | 0.025325869 | 0.02555663  | 0.015025185 |
| ENSG00000144642 | 0.061087541 | 0.050945413 | 0.037988174 | 0.037044306 |
| ENSG00000160271 | 0.025713699 | 0.03393126  | 0.032728145 | 0.029976316 |
| ENSG00000107623 | 0.015686695 | 0.02538447  | 0.025644244 | 0.015043396 |
| ENSG00000161800 | 0.037551413 | 0.034098016 | 0.031623747 | 0.026925512 |
| ENSG00000125900 | 0.019998584 | 0.026330274 | 0.024879636 | 0.020383789 |
| ENSG00000188011 | 0.016318468 | 0.025145676 | 0.024926627 | 0.016860541 |
| ENSG00000244405 | 0.079518492 | 0.053402503 | 0.056603177 | 0.060523371 |
| ENSG00000012817 | 0.225890988 | 0.229641431 | 0.214402944 | 0.213501042 |
| ENSG00000163444 | 0.025203167 | 0.031502474 | 0.029549921 | 0.019155785 |
| ENSG00000187566 | 0.016075276 | 0.024928424 | 0.024651092 | 0.014636129 |
| ENSG00000151117 | 0.017245357 | 0.025472764 | 0.025124385 | 0.015277651 |
| ENSG00000110799 | 0.018210149 | 0.027090568 | 0.025986507 | 0.01805171  |
| ENSG00000122641 | 0.025185026 | 0.029492189 | 0.029031777 | 0.021491617 |
| ENSG00000215251 | 0.033813442 | 0.038740095 | 0.046791699 | 0.034352398 |

|                 |             |             |             |             |
|-----------------|-------------|-------------|-------------|-------------|
| ENSG00000103326 | 0.018562656 | 0.027302016 | 0.026620789 | 0.020761607 |
| ENSG00000197915 | 0.013509338 | 0.023970626 | 0.023697108 | 0.013577247 |
| ENSG00000150269 | 0.017611984 | 0.025601671 | 0.024942343 | 0.016091942 |
| ENSG00000137414 | 0.029982845 | 0.038692392 | 0.03781155  | 0.025199463 |
| ENSG00000130340 | 0.014955221 | 0.024301245 | 0.024666423 | 0.014543308 |
| ENSG00000115461 | 0.01894934  | 0.026192014 | 0.026354904 | 0.017505079 |
| ENSG00000106436 | 0.016843288 | 0.025852716 | 0.026005209 | 0.015972567 |
| ENSG00000198754 | 0.038105101 | 0.035414305 | 0.038553173 | 0.030062587 |
| ENSG00000169247 | 0.01656509  | 0.02589761  | 0.024378156 | 0.014971488 |
| ENSG00000223638 | 0.02539009  | 0.041748936 | 0.029762783 | 0.016646319 |
| ENSG00000196620 | 0.01667781  | 0.02404549  | 0.025068031 | 0.014323233 |
| ENSG00000127603 | 0.017394084 | 0.028586102 | 0.026444378 | 0.018916959 |
| ENSG00000100319 | 0.023892606 | 0.027670395 | 0.02706028  | 0.021870528 |
| ENSG00000115657 | 0.043175791 | 0.043739737 | 0.034635424 | 0.036439117 |
| ENSG00000213760 | 0.038172197 | 0.042521825 | 0.036723835 | 0.032340825 |
| ENSG00000221866 | 0.019692654 | 0.026795762 | 0.027027499 | 0.017551092 |
| ENSG00000182979 | 0.026930591 | 0.029312172 | 0.03047272  | 0.022384313 |
| ENSG00000063322 | 0.026850426 | 0.028552923 | 0.030078107 | 0.022695311 |
| ENSG00000013392 | 0.03285572  | 0.037744071 | 0.03922887  | 0.033445691 |
| ENSG00000135720 | 0.031073789 | 0.029913791 | 0.032598145 | 0.024592197 |
| ENSG00000149100 | 0.019516172 | 0.027839546 | 0.026732448 | 0.017990457 |
| ENSG00000177839 | 0.047448776 | 0.043532228 | 0.037509324 | 0.048275805 |
| ENSG00000180432 | 0.015454888 | 0.024720734 | 0.024476903 | 0.015720825 |
| ENSG00000050820 | 0.052240747 | 0.056000306 | 0.050380006 | 0.055753217 |
| ENSG00000070778 | 0.016168219 | 0.025280259 | 0.025292855 | 0.015439104 |
| ENSG00000185338 | 0.059640365 | 0.051219076 | 0.051565619 | 0.053243089 |
| ENSG00000011105 | 0.017261774 | 0.025451733 | 0.025271205 | 0.017078804 |
| ENSG00000114737 | 0.023736907 | 0.032162191 | 0.027517174 | 0.023286739 |
| ENSG00000112164 | 0.015188517 | 0.024889011 | 0.025424035 | 0.01475405  |
| ENSG00000114503 | 0.018848269 | 0.028528681 | 0.029302463 | 0.019084685 |
| ENSG00000121417 | 0.027375732 | 0.03711608  | 0.038600682 | 0.025956452 |
| ENSG00000187513 | 0.017722769 | 0.025995076 | 0.025965875 | 0.016984926 |
| ENSG00000128050 | 0.028181765 | 0.030478047 | 0.027302604 | 0.022542095 |
| ENSG00000128709 | 0.016363817 | 0.025901804 | 0.024662009 | 0.015765585 |
| ENSG00000126773 | 0.030467788 | 0.03550027  | 0.032376514 | 0.02596694  |
| ENSG00000183307 | 0.016569032 | 0.02558349  | 0.025419609 | 0.014518565 |
| ENSG00000162063 | 0.054604363 | 0.037651269 | 0.039528095 | 0.041236234 |
| ENSG00000165782 | 0.033751435 | 0.041980423 | 0.039840219 | 0.032909974 |
| ENSG00000160050 | 0.036720477 | 0.033605803 | 0.03244242  | 0.035215429 |
| ENSG00000106511 | 0.015707941 | 0.024707137 | 0.024601738 | 0.015615208 |
| ENSG00000007062 | 0.019603185 | 0.02706087  | 0.029405363 | 0.020978595 |
| ENSG00000120738 | 0.089487957 | 0.054260181 | 0.077075597 | 0.073465181 |
| ENSG00000119614 | 0.018025223 | 0.026187155 | 0.025182121 | 0.014187194 |
| ENSG00000121749 | 0.025872261 | 0.031959039 | 0.0328717   | 0.022465595 |
| ENSG00000130772 | 0.018469897 | 0.026479316 | 0.028031272 | 0.019799261 |
| ENSG00000204178 | 0.034845182 | 0.036840652 | 0.040790928 | 0.029688222 |
| ENSG00000186564 | 0.016675506 | 0.024915998 | 0.025133595 | 0.016259864 |
| ENSG00000164687 | 0.038015996 | 0.034591709 | 0.030339064 | 0.038733667 |
| ENSG00000152620 | 0.03720497  | 0.035988836 | 0.032285493 | 0.028187394 |
| ENSG00000166922 | 0.040016381 | 0.040941913 | 0.027003781 | 0.022511475 |
| ENSG00000133142 | 0.030479378 | 0.033181832 | 0.034425873 | 0.023500551 |
| ENSG00000116977 | 0.018549822 | 0.026169428 | 0.02749028  | 0.020015387 |
| ENSG00000119121 | 0.022142435 | 0.028438522 | 0.028228405 | 0.020683039 |
| ENSG00000184575 | 0.044004758 | 0.049580567 | 0.037849825 | 0.04434935  |

|                 |             |             |             |             |
|-----------------|-------------|-------------|-------------|-------------|
| ENSG00000198626 | 0.015806164 | 0.025774841 | 0.02483659  | 0.015653881 |
| ENSG00000140522 | 0.015316469 | 0.025251894 | 0.023998676 | 0.015886865 |
| ENSG00000197324 | 0.027374041 | 0.031372659 | 0.040259194 | 0.026626542 |
| ENSG00000171180 | 0.015047253 | 0.024728159 | 0.025384689 | 0.015683716 |
| ENSG00000172782 | 0.014750654 | 0.024781638 | 0.024195501 | 0.014516087 |
| ENSG00000119333 | 0.038794168 | 0.042308536 | 0.036578096 | 0.031024866 |
| ENSG00000168807 | 0.028557245 | 0.028837566 | 0.02676879  | 0.021714282 |
| ENSG00000214706 | 0.034294145 | 0.032858576 | 0.032724188 | 0.034225989 |
| ENSG00000101544 | 0.043826954 | 0.055993182 | 0.062338714 | 0.053931503 |
| ENSG00000117676 | 0.032823333 | 0.032116604 | 0.035216157 | 0.030653995 |
| ENSG00000170345 | 0.085830324 | 0.058467941 | 0.0489592   | 0.06323457  |
| ENSG00000152503 | 0.017297787 | 0.025175434 | 0.025425988 | 0.01571865  |
| ENSG00000016391 | 0.046974208 | 0.047759132 | 0.040867887 | 0.049110521 |
| ENSG00000160097 | 0.016897209 | 0.026478109 | 0.025412746 | 0.01639097  |
| ENSG00000166682 | 0.015934431 | 0.025392383 | 0.024586223 | 0.016016752 |
| ENSG00000139324 | 0.02028426  | 0.026147631 | 0.026916611 | 0.021609863 |
| ENSG00000120279 | 0.02567283  | 0.02763863  | 0.0286056   | 0.028637645 |
| ENSG00000139055 | 0.048664037 | 0.040654017 | 0.039252388 | 0.037544526 |
| ENSG00000164163 | 0.028056213 | 0.032012051 | 0.031992857 | 0.031326942 |
| ENSG00000128294 | 0.037094259 | 0.037145785 | 0.035914777 | 0.02871396  |
| ENSG00000148120 | 0.021962917 | 0.026980355 | 0.027664877 | 0.019827757 |
| ENSG00000120586 | 0.01529763  | 0.025101092 | 0.024447094 | 0.014981845 |
| ENSG00000139263 | 0.089842202 | 0.073784317 | 0.074978209 | 0.072811542 |
| ENSG00000107959 | 0.059162455 | 0.058746798 | 0.04689001  | 0.054901298 |
| ENSG00000165996 | 0.103179287 | 0.093766062 | 0.078400437 | 0.096465162 |
| ENSG00000115935 | 0.031066728 | 0.034800888 | 0.030417572 | 0.024600346 |
| ENSG00000161265 | 0.029637336 | 0.030385861 | 0.033353385 | 0.027227746 |
| ENSG00000125149 | 0.022325778 | 0.028358793 | 0.026163114 | 0.017850611 |
| ENSG00000132879 | 0.016100999 | 0.02558613  | 0.023933946 | 0.015496946 |
| ENSG00000173114 | 0.023419301 | 0.029617395 | 0.028613813 | 0.020823187 |
| ENSG00000073282 | 0.07630944  | 0.071201173 | 0.059247489 | 0.068446144 |
| ENSG00000167461 | 0.025624931 | 0.029878976 | 0.033101267 | 0.024078869 |
| ENSG00000133103 | 0.036796886 | 0.036228523 | 0.037359081 | 0.029803829 |
| ENSG00000234745 | 0.02201478  | 0.029003279 | 0.029898518 | 0.020999417 |
| ENSG00000140320 | 0.024456425 | 0.034962812 | 0.035470032 | 0.022339592 |
| ENSG00000163110 | 0.030176395 | 0.030503112 | 0.03120132  | 0.02667715  |
| ENSG00000182752 | 0.022668432 | 0.027868212 | 0.03201886  | 0.019028964 |
| ENSG00000105464 | 0.014681991 | 0.025679947 | 0.024688242 | 0.015363075 |
| ENSG00000144476 | 0.097987134 | 0.086924784 | 0.089326566 | 0.098152693 |
| ENSG00000169554 | 0.057559049 | 0.045553128 | 0.037860621 | 0.044457124 |
| ENSG00000058063 | 0.033554359 | 0.038610114 | 0.033225271 | 0.031281528 |
| ENSG00000180155 | 0.01482722  | 0.02467769  | 0.024575178 | 0.016250549 |
| ENSG00000204392 | 0.026056781 | 0.026604944 | 0.030208574 | 0.020728388 |
| ENSG00000133063 | 0.017556762 | 0.024541994 | 0.026790633 | 0.016225804 |
| ENSG00000168763 | 0.036765888 | 0.035048157 | 0.035893121 | 0.038581228 |
| ENSG00000129932 | 0.034447098 | 0.040145353 | 0.035505912 | 0.031140187 |
| ENSG00000092036 | 0.037750803 | 0.033625122 | 0.032115221 | 0.027675204 |
| ENSG00000181885 | 0.020269569 | 0.027320712 | 0.026120643 | 0.018811165 |
| ENSG00000212900 | 0.014612987 | 0.024230519 | 0.023794275 | 0.014584181 |
| ENSG00000154920 | 0.032160406 | 0.031607548 | 0.030203312 | 0.024655385 |
| ENSG00000167311 | 0.016531398 | 0.025677226 | 0.025234855 | 0.01642643  |
| ENSG00000110367 | 0.027868123 | 0.028363169 | 0.02971331  | 0.024735428 |
| ENSG00000112539 | 0.017366654 | 0.024971266 | 0.025248143 | 0.015972815 |
| ENSG00000073921 | 0.04032821  | 0.054468586 | 0.04303777  | 0.042674331 |

|                  |             |             |             |             |
|------------------|-------------|-------------|-------------|-------------|
| ENSG00000187867  | 0.015780416 | 0.02559628  | 0.024296812 | 0.015253132 |
| ENSG00000110713  | 0.060471592 | 0.051598717 | 0.051254519 | 0.053156951 |
| ENSG00000204138  | 0.025282413 | 0.032063364 | 0.030453912 | 0.02604204  |
| ENSG00000164307  | 0.041482571 | 0.044505476 | 0.032651713 | 0.036018975 |
| ENSG00000104549  | 0.02967016  | 0.035641676 | 0.030364945 | 0.024231651 |
| ENSG00000177398  | 0.043889407 | 0.038019663 | 0.041477905 | 0.032720117 |
| ENSG00000156374  | 0.033009936 | 0.04036168  | 0.039461107 | 0.03147529  |
| ENSG00000152556  | 0.033847688 | 0.036099897 | 0.031028455 | 0.026904333 |
| ENSG00000100644  | 0.042027682 | 0.049875882 | 0.047484101 | 0.06016154  |
| ENSG00000104901  | 0.016389091 | 0.024912307 | 0.025674917 | 0.016215966 |
| ENSG00000160606  | 0.028428689 | 0.03171273  | 0.030651868 | 0.024513393 |
| ENSG00000196071  | 0.016081437 | 0.024511163 | 0.025759325 | 0.015538495 |
| ENSG00000172667  | 0.025895923 | 0.028803148 | 0.031364531 | 0.022443144 |
| ENSG00000008516  | 0.042597104 | 0.039524768 | 0.036949285 | 0.049791893 |
| ENSG00000172459  | 0.015636541 | 0.024379    | 0.024911479 | 0.016458008 |
| ENSG00000007080  | 0.026369423 | 0.029599639 | 0.027377908 | 0.023746988 |
| ENSG00000148483  | 0.01306356  | 0.023532593 | 0.023527311 | 0.012981818 |
| ENSG00000146618  | 0.015929539 | 0.024883434 | 0.025845057 | 0.016463346 |
| ENSG00000100387  | 0.017872003 | 0.027276938 | 0.026154718 | 0.017132877 |
| ENSG00000008083  | 0.051985164 | 0.048903442 | 0.043007895 | 0.051139331 |
| ENSG00000143641  | 0.043916363 | 0.04724623  | 0.038897908 | 0.033604563 |
| ENSG00000169129  | 0.103959551 | 0.072107332 | 0.053800143 | 0.093153993 |
| ENSG00000166398  | 0.032399457 | 0.037378788 | 0.035240558 | 0.027345693 |
| ENSG00000233827  | 0.015614643 | 0.025928246 | 0.024204588 | 0.015411442 |
| ENSG000000091073 | 0.040772508 | 0.039156719 | 0.045505806 | 0.036701424 |
| ENSG00000170500  | 0.016601326 | 0.024954763 | 0.025440531 | 0.015729139 |
| ENSG00000115896  | 0.028753295 | 0.029668507 | 0.024660478 | 0.03991838  |
| ENSG00000149346  | 0.040045182 | 0.038142365 | 0.033982207 | 0.038285111 |
| ENSG00000145555  | 0.044880952 | 0.043303928 | 0.035245016 | 0.027168982 |
| ENSG00000171208  | 0.045860307 | 0.040149611 | 0.035335407 | 0.041322261 |
| ENSG00000143363  | 0.026458648 | 0.031389531 | 0.02989427  | 0.025696785 |
| ENSG00000135451  | 0.051188778 | 0.036760784 | 0.042317047 | 0.037652464 |
| ENSG00000144868  | 0.015727596 | 0.024882794 | 0.024638325 | 0.015481476 |
| ENSG00000198961  | 0.022618544 | 0.028475516 | 0.028532371 | 0.022127398 |
| ENSG00000143184  | 0.134400204 | 0.119828945 | 0.100873647 | 0.134757472 |
| ENSG00000097096  | 0.024652323 | 0.029663071 | 0.028048066 | 0.027165495 |
| ENSG00000017797  | 0.027081952 | 0.0332366   | 0.031171087 | 0.031147852 |
| ENSG00000115317  | 0.029188434 | 0.030816571 | 0.034500319 | 0.033970668 |
| ENSG00000240021  | 0.014938335 | 0.024709632 | 0.025155828 | 0.014452332 |
| ENSG00000179542  | 0.01879064  | 0.025238014 | 0.025664965 | 0.017683523 |
| ENSG00000071564  | 0.043958467 | 0.036403626 | 0.046439307 | 0.034435579 |
| ENSG00000163060  | 0.019775171 | 0.02503598  | 0.025992344 | 0.034484636 |
| ENSG00000204569  | 0.037941111 | 0.033333761 | 0.045574605 | 0.030949094 |
| ENSG00000138660  | 0.034503126 | 0.037817135 | 0.036139938 | 0.035386055 |
| ENSG00000177485  | 0.016412334 | 0.025493971 | 0.025416126 | 0.015098654 |
| ENSG00000173588  | 0.034252941 | 0.046483875 | 0.038553761 | 0.02829328  |
| ENSG00000176974  | 0.054908816 | 0.043117607 | 0.040614759 | 0.033136915 |
| ENSG00000131944  | 0.024542789 | 0.027956187 | 0.028927166 | 0.021064283 |
| ENSG00000168594  | 0.024144247 | 0.025530966 | 0.024976895 | 0.01602042  |
| ENSG00000118412  | 0.036058621 | 0.040954144 | 0.035431106 | 0.032870692 |
| ENSG00000177202  | 0.016781268 | 0.026353604 | 0.025468329 | 0.015833883 |
| ENSG00000136881  | 0.015278175 | 0.024442135 | 0.025760909 | 0.014786173 |
| ENSG00000167483  | 0.038821328 | 0.033610795 | 0.047946659 | 0.034053184 |
| ENSG00000103168  | 0.015584254 | 0.02595113  | 0.025806109 | 0.017728826 |

|                 |             |             |             |             |
|-----------------|-------------|-------------|-------------|-------------|
| ENSG00000213424 | 0.014529598 | 0.02481527  | 0.024985683 | 0.014908343 |
| ENSG00000131914 | 0.016030523 | 0.024539819 | 0.024773365 | 0.015546361 |
| ENSG00000179271 | 0.03182221  | 0.030266989 | 0.034999525 | 0.031408632 |
| ENSG00000120500 | 0.018263027 | 0.025840787 | 0.025484081 | 0.017275245 |
| ENSG00000094841 | 0.030997137 | 0.036270261 | 0.03236043  | 0.023401502 |
| ENSG00000001629 | 0.025651581 | 0.032392413 | 0.02967637  | 0.02490417  |
| ENSG00000140941 | 0.030398509 | 0.03971951  | 0.03811879  | 0.026820293 |
| ENSG00000176605 | 0.01791848  | 0.026552046 | 0.025513637 | 0.015257458 |
| ENSG00000047457 | 0.01641015  | 0.025133414 | 0.024521749 | 0.015944914 |
| ENSG00000145414 | 0.030158101 | 0.038002588 | 0.038414841 | 0.041864662 |
| ENSG00000112394 | 0.039868156 | 0.032844408 | 0.032353951 | 0.032671029 |
| ENSG00000106066 | 0.019957208 | 0.024708996 | 0.025427026 | 0.016057073 |
| ENSG00000188603 | 0.026875675 | 0.034952104 | 0.034832851 | 0.03173401  |
| ENSG00000099399 | 0.023029289 | 0.024553049 | 0.027343023 | 0.021388906 |
| ENSG00000121957 | 0.058846229 | 0.045692025 | 0.038273121 | 0.037367447 |
| ENSG00000215421 | 0.01687796  | 0.025425412 | 0.02546964  | 0.016084935 |
| ENSG00000171421 | 0.026083374 | 0.028388417 | 0.027552399 | 0.021582351 |
| ENSG00000185664 | 0.034292296 | 0.03919379  | 0.029952492 | 0.021443222 |
| ENSG00000148488 | 0.016698476 | 0.025051806 | 0.024516306 | 0.017031299 |
| ENSG00000196396 | 0.027423497 | 0.029148431 | 0.030832246 | 0.020936719 |
| ENSG00000090487 | 0.022309055 | 0.029094972 | 0.028584736 | 0.018269697 |
| ENSG00000196850 | 0.033546733 | 0.031858612 | 0.033859347 | 0.037320513 |
| ENSG00000157554 | 0.015851661 | 0.025254321 | 0.026658661 | 0.016552835 |
| ENSG00000198814 | 0.049429846 | 0.044638968 | 0.039110896 | 0.043141391 |
| ENSG00000198265 | 0.03014237  | 0.036874059 | 0.035933766 | 0.033382247 |
| ENSG00000174307 | 0.047920054 | 0.043835961 | 0.036780645 | 0.039326154 |
| ENSG00000171763 | 0.032098448 | 0.032745515 | 0.031925633 | 0.025670468 |
| ENSG00000230657 | 0.015804075 | 0.024679376 | 0.024139189 | 0.014194365 |
| ENSG00000179598 | 0.056615657 | 0.060699086 | 0.058970795 | 0.046728295 |
| ENSG00000103067 | 0.023413057 | 0.03839737  | 0.041234829 | 0.02217709  |
| ENSG00000205329 | 0.01840106  | 0.026794389 | 0.026049197 | 0.01720816  |
| ENSG00000187653 | 0.013662781 | 0.023599381 | 0.024010119 | 0.013717197 |
| ENSG00000146281 | 0.031558367 | 0.030794553 | 0.029965504 | 0.023481305 |
| ENSG00000010704 | 0.016266984 | 0.026507089 | 0.02564474  | 0.016436091 |
| ENSG00000141985 | 0.027351033 | 0.032893937 | 0.030689282 | 0.029144725 |
| ENSG00000136040 | 0.028085982 | 0.032051192 | 0.033220679 | 0.032600449 |
| ENSG00000171847 | 0.025104281 | 0.031437195 | 0.027007921 | 0.021578553 |
| ENSG00000148908 | 0.034244531 | 0.034915549 | 0.034966717 | 0.030949811 |
| ENSG00000172366 | 0.029695593 | 0.031528262 | 0.031750156 | 0.026683939 |
| ENSG00000171444 | 0.035796915 | 0.035164689 | 0.031215821 | 0.027834557 |
| ENSG00000184194 | 0.01467641  | 0.025019307 | 0.024504519 | 0.014450434 |
| ENSG00000057935 | 0.039273581 | 0.037533118 | 0.032704435 | 0.026920916 |
| ENSG00000150627 | 0.041119599 | 0.033889014 | 0.028075799 | 0.019734269 |
| ENSG00000108559 | 0.032292477 | 0.033626872 | 0.031009046 | 0.02286038  |
| ENSG00000124257 | 0.050671825 | 0.051358483 | 0.040538416 | 0.040711241 |
| ENSG00000139436 | 0.030355933 | 0.031186921 | 0.031757102 | 0.02647313  |
| ENSG00000244414 | 0.014851213 | 0.024837162 | 0.024848774 | 0.014733584 |
| ENSG00000110887 | 0.014686659 | 0.024158982 | 0.024462861 | 0.015181327 |
| ENSG00000124693 | 0.063743111 | 0.04699643  | 0.051623796 | 0.062891919 |
| ENSG00000108474 | 0.034656458 | 0.036467046 | 0.032559176 | 0.033233802 |
| ENSG00000133477 | 0.017286945 | 0.026389625 | 0.025870673 | 0.018662674 |
| ENSG00000067221 | 0.037248681 | 0.038481861 | 0.03603854  | 0.036610889 |
| ENSG00000167825 | 0.015598192 | 0.024676542 | 0.025284531 | 0.016427677 |
| ENSG00000185122 | 0.018458068 | 0.028026801 | 0.033509976 | 0.024190657 |

|                 |             |             |             |             |
|-----------------|-------------|-------------|-------------|-------------|
| ENSG00000100028 | 0.032479077 | 0.035070082 | 0.037512712 | 0.034367466 |
| ENSG00000177830 | 0.034069487 | 0.033640279 | 0.03192419  | 0.02909418  |
| ENSG00000050344 | 0.048489614 | 0.038247585 | 0.033684968 | 0.040202215 |
| ENSG00000171004 | 0.015639844 | 0.025213124 | 0.024231854 | 0.015976292 |
| ENSG00000166037 | 0.033682122 | 0.032976971 | 0.029564711 | 0.023611049 |
| ENSG00000049246 | 0.096383654 | 0.081332782 | 0.08118285  | 0.077100464 |
| ENSG00000117593 | 0.040210621 | 0.041807388 | 0.0315829   | 0.029203932 |
| ENSG00000023228 | 0.029480357 | 0.035850756 | 0.030057694 | 0.034360115 |
| ENSG00000175489 | 0.017284552 | 0.026667023 | 0.024819492 | 0.016144109 |
| ENSG00000067992 | 0.038744474 | 0.039037984 | 0.039191877 | 0.028681208 |
| ENSG00000110422 | 0.022585015 | 0.027212799 | 0.032303944 | 0.01829717  |
| ENSG00000105928 | 0.035659935 | 0.057005248 | 0.060624717 | 0.058200733 |
| ENSG00000143845 | 0.014542643 | 0.024443872 | 0.024171396 | 0.014790558 |
| ENSG00000064393 | 0.036173607 | 0.038732374 | 0.039096152 | 0.035575746 |
| ENSG00000102854 | 0.025034917 | 0.025393599 | 0.030395863 | 0.021901276 |
| ENSG00000137177 | 0.019667964 | 0.024777164 | 0.025226309 | 0.015827097 |
| ENSG00000205174 | 0.013245672 | 0.023941474 | 0.024113843 | 0.013405844 |
| ENSG00000136653 | 0.026000052 | 0.02820842  | 0.028857693 | 0.022968741 |
| ENSG00000213689 | 0.031761514 | 0.034748954 | 0.031591337 | 0.025463078 |
| ENSG00000137216 | 0.030404813 | 0.03271804  | 0.033136627 | 0.029831603 |
| ENSG00000154146 | 0.082814196 | 0.059493046 | 0.062452721 | 0.061251221 |
| ENSG00000183347 | 0.020336903 | 0.030261245 | 0.024747761 | 0.026006185 |
| ENSG00000105519 | 0.018049877 | 0.027270752 | 0.026411644 | 0.017932515 |
| ENSG00000112242 | 0.030010312 | 0.035939079 | 0.034770535 | 0.026844985 |
| ENSG00000150054 | 0.014467695 | 0.026077305 | 0.024833477 | 0.016163793 |
| ENSG00000113300 | 0.032918607 | 0.034839394 | 0.034647332 | 0.029079393 |
| ENSG00000153147 | 0.02523303  | 0.032256855 | 0.028229897 | 0.023186594 |
| ENSG00000120341 | 0.023705682 | 0.026146685 | 0.025507752 | 0.015653752 |
| ENSG00000087191 | 0.023589915 | 0.029194884 | 0.027357387 | 0.022016461 |
| ENSG00000136754 | 0.031419521 | 0.04041061  | 0.032360916 | 0.071669455 |
| ENSG00000179335 | 0.031958541 | 0.044119749 | 0.042335536 | 0.032270774 |
| ENSG00000198839 | 0.02497531  | 0.03110766  | 0.030256542 | 0.025084154 |
| ENSG00000116783 | 0.018868252 | 0.024277749 | 0.026112823 | 0.014605399 |
| ENSG00000176293 | 0.021637656 | 0.027325327 | 0.024983918 | 0.019087659 |
| ENSG00000143442 | 0.024598886 | 0.032944846 | 0.031306389 | 0.025373566 |
| ENSG00000181904 | 0.037543376 | 0.035807885 | 0.038258757 | 0.036094536 |
| ENSG00000101246 | 0.029102263 | 0.03248196  | 0.029801529 | 0.027954608 |
| ENSG00000160801 | 0.019433083 | 0.027029002 | 0.026736843 | 0.046033319 |
| ENSG00000128346 | 0.016576221 | 0.025352765 | 0.024190145 | 0.016387777 |
| ENSG00000084070 | 0.025076375 | 0.029297871 | 0.03133735  | 0.023580622 |
| ENSG00000134640 | 0.015545323 | 0.025454641 | 0.025211766 | 0.015578828 |
| ENSG00000175591 | 0.016186795 | 0.024722268 | 0.024638437 | 0.014331472 |
| ENSG00000083814 | 0.027360064 | 0.03266856  | 0.033442314 | 0.023183542 |
| ENSG00000147380 | 0.017071335 | 0.025088167 | 0.026206867 | 0.016933327 |
| ENSG00000166887 | 0.021646853 | 0.028325461 | 0.031427527 | 0.020154336 |
| ENSG00000111581 | 0.032854318 | 0.03542507  | 0.032362521 | 0.024893932 |
| ENSG00000105613 | 0.018006089 | 0.026404049 | 0.02740831  | 0.018810504 |
| ENSG00000172139 | 0.01621381  | 0.026610759 | 0.025576102 | 0.017023149 |
| ENSG00000112486 | 0.022806732 | 0.029183762 | 0.030031603 | 0.022636648 |
| ENSG00000152154 | 0.016765441 | 0.025033432 | 0.024806897 | 0.018316603 |
| ENSG00000130311 | 0.022678223 | 0.03133812  | 0.037214425 | 0.027312115 |
| ENSG00000117650 | 0.04976788  | 0.045239682 | 0.038420836 | 0.036322942 |
| ENSG00000197977 | 0.015177775 | 0.02500461  | 0.024347459 | 0.015842445 |
| ENSG00000057019 | 0.061285086 | 0.046725791 | 0.040568975 | 0.042316678 |

|                 |             |             |             |             |
|-----------------|-------------|-------------|-------------|-------------|
| ENSG00000130203 | 0.020410299 | 0.026201823 | 0.024965613 | 0.016633345 |
| ENSG00000117362 | 0.026864027 | 0.028665821 | 0.033468811 | 0.021559919 |
| ENSG00000025423 | 0.026669133 | 0.032509749 | 0.030595871 | 0.02063048  |
| ENSG00000162594 | 0.06481749  | 0.078765482 | 0.073883148 | 0.062178533 |
| ENSG00000197723 | 0.015158607 | 0.024877581 | 0.024873059 | 0.014832754 |
| ENSG00000166145 | 0.047265133 | 0.047582591 | 0.046076346 | 0.046932288 |
| ENSG00000082293 | 0.030721809 | 0.034794036 | 0.029650544 | 0.02606289  |
| ENSG00000127054 | 0.027092233 | 0.027696976 | 0.029144972 | 0.022153565 |
| ENSG00000184022 | 0.021780674 | 0.026773429 | 0.026386877 | 0.018635001 |
| ENSG00000090060 | 0.030963735 | 0.035700031 | 0.03210884  | 0.028727249 |
| ENSG00000151208 | 0.077184617 | 0.064347587 | 0.05704952  | 0.067959618 |
| ENSG00000205755 | 0.018015523 | 0.025633258 | 0.024570787 | 0.014719774 |
| ENSG00000175879 | 0.015178032 | 0.024782286 | 0.024854981 | 0.014628142 |
| ENSG00000119414 | 0.021030539 | 0.029635288 | 0.029625314 | 0.018723547 |
| ENSG00000130707 | 0.104445412 | 0.083850712 | 0.073430245 | 0.08077936  |
| ENSG00000158164 | 0.03903779  | 0.033645815 | 0.029581351 | 0.022628109 |
| ENSG00000096395 | 0.015940774 | 0.025134976 | 0.024850822 | 0.015073998 |
| ENSG00000170807 | 0.013371648 | 0.023799761 | 0.023895825 | 0.012856848 |
| ENSG00000123933 | 0.051156812 | 0.051366842 | 0.052477194 | 0.049267263 |
| ENSG00000151849 | 0.03442357  | 0.033740221 | 0.032247604 | 0.025533682 |
| ENSG00000183044 | 0.02036964  | 0.026157486 | 0.025737097 | 0.019122693 |
| ENSG00000223865 | 0.022257229 | 0.033164124 | 0.03064108  | 0.028905603 |
| ENSG00000154252 | 0.016931284 | 0.025783061 | 0.025415136 | 0.016552958 |
| ENSG00000082482 | 0.016353289 | 0.025690115 | 0.02643564  | 0.017129331 |
| ENSG00000163701 | 0.018220136 | 0.025613481 | 0.025252858 | 0.01639502  |
| ENSG00000122042 | 0.026909136 | 0.037388454 | 0.034686597 | 0.030857118 |
| ENSG00000183638 | 0.016291246 | 0.025290688 | 0.024673075 | 0.015517208 |
| ENSG00000122194 | 0.042151726 | 0.026598598 | 0.029536371 | 0.023742074 |
| ENSG00000175455 | 0.032895662 | 0.03444668  | 0.033272486 | 0.02419876  |
| ENSG00000075651 | 0.104196301 | 0.074753925 | 0.066639962 | 0.088529155 |
| ENSG00000136114 | 0.02480063  | 0.031893337 | 0.031590082 | 0.019227826 |
| ENSG00000123892 | 0.086052768 | 0.076040446 | 0.075783217 | 0.094571198 |
| ENSG00000182224 | 0.037580326 | 0.040083616 | 0.040372184 | 0.031817532 |
| ENSG00000127995 | 0.034979507 | 0.039843159 | 0.034619757 | 0.037444504 |
| ENSG00000100744 | 0.038959779 | 0.044973056 | 0.040971387 | 0.044106303 |
| ENSG00000243989 | 0.030034323 | 0.034852667 | 0.034653914 | 0.031461445 |
| ENSG00000145945 | 0.042343919 | 0.042520287 | 0.040901052 | 0.033186255 |
| ENSG00000162572 | 0.028231728 | 0.038888949 | 0.030420837 | 0.031504822 |
| ENSG00000074527 | 0.016093224 | 0.024401076 | 0.024511212 | 0.016111028 |
| ENSG00000181368 | 0.062175021 | 0.054754264 | 0.049987331 | 0.055382189 |
| ENSG00000162641 | 0.014882551 | 0.025186622 | 0.02536555  | 0.015338248 |
| ENSG00000103264 | 0.025874409 | 0.029807879 | 0.034255943 | 0.023554197 |
| ENSG00000196517 | 0.015176427 | 0.025183184 | 0.025140242 | 0.014384314 |
| ENSG00000171914 | 0.074779561 | 0.031733637 | 0.025460767 | 0.023313937 |
| ENSG00000120727 | 0.026662237 | 0.032796842 | 0.028172714 | 0.022966645 |
| ENSG00000020129 | 0.026900446 | 0.032200169 | 0.037168987 | 0.032137308 |
| ENSG00000065371 | 0.016717995 | 0.025304991 | 0.025417213 | 0.015613388 |
| ENSG00000174370 | 0.015939913 | 0.026082403 | 0.025991136 | 0.015587031 |
| ENSG00000151498 | 0.033880239 | 0.034770907 | 0.032428874 | 0.027201337 |
| ENSG00000166359 | 0.015454124 | 0.02498491  | 0.025241502 | 0.013910649 |
| ENSG00000105246 | 0.053447553 | 0.0373408   | 0.042941581 | 0.048610388 |
| ENSG00000155097 | 0.033712758 | 0.040686738 | 0.038983627 | 0.028747623 |
| ENSG00000157349 | 0.025806319 | 0.030439091 | 0.032798828 | 0.019989706 |
| ENSG00000100554 | 0.03035107  | 0.034792934 | 0.031317899 | 0.021880433 |

|                 |             |             |             |             |
|-----------------|-------------|-------------|-------------|-------------|
| ENSG00000197134 | 0.032820383 | 0.036166041 | 0.032905435 | 0.024942582 |
| ENSG00000109016 | 0.025658242 | 0.029891466 | 0.028618961 | 0.022974099 |
| ENSG00000125388 | 0.017040551 | 0.025473357 | 0.024893189 | 0.018201932 |
| ENSG00000141627 | 0.025391241 | 0.029727443 | 0.028276188 | 0.021997606 |
| ENSG00000204290 | 0.01536777  | 0.02488539  | 0.024809426 | 0.014908015 |
| ENSG00000132932 | 0.015204908 | 0.025171504 | 0.024866576 | 0.015435772 |
| ENSG00000198574 | 0.018433241 | 0.028100327 | 0.027355872 | 0.017485043 |
| ENSG00000186407 | 0.016092594 | 0.025401767 | 0.024982605 | 0.015026589 |
| ENSG00000055147 | 0.021163799 | 0.034217896 | 0.030467832 | 0.018451423 |
| ENSG00000173281 | 0.02742695  | 0.035132875 | 0.033389384 | 0.02729663  |
| ENSG00000204520 | 0.040061443 | 0.050582957 | 0.042574309 | 0.03525455  |
| ENSG00000175279 | 0.035151815 | 0.035486681 | 0.03155821  | 0.029515836 |
| ENSG00000170748 | 0.016626421 | 0.025303532 | 0.024186092 | 0.014923159 |
| ENSG00000150201 | 0.015089287 | 0.024711339 | 0.024695988 | 0.014637375 |
| ENSG00000103591 | 0.019585762 | 0.026409559 | 0.028641957 | 0.017030733 |
| ENSG00000129910 | 0.021554792 | 0.027193639 | 0.027349107 | 0.023348104 |
| ENSG00000122711 | 0.017412942 | 0.025613624 | 0.025163503 | 0.015066576 |
| ENSG00000154678 | 0.01976766  | 0.027655856 | 0.02469219  | 0.019825565 |
| ENSG00000235987 | 0.019019351 | 0.046747808 | 0.045831507 | 0.035136049 |
| ENSG00000206172 | 0.025127864 | 0.024643799 | 0.024404912 | 0.051776769 |
| ENSG00000178084 | 0.015871937 | 0.02503614  | 0.024558184 | 0.015373958 |
| ENSG00000170923 | 0.012899691 | 0.02344604  | 0.024076084 | 0.013561976 |
| ENSG00000075290 | 0.015151523 | 0.025154076 | 0.025371329 | 0.013821588 |
| ENSG00000075388 | 0.016966708 | 0.026478974 | 0.025885915 | 0.017344026 |
| ENSG00000082929 | 0.020923139 | 0.026912207 | 0.027825131 | 0.017080771 |
| ENSG00000162618 | 0.013858699 | 0.023618772 | 0.023523243 | 0.013438397 |
| ENSG00000099282 | 0.026587022 | 0.029581578 | 0.027892096 | 0.027040355 |
| ENSG00000110200 | 0.030956165 | 0.02921791  | 0.031218625 | 0.030458011 |
| ENSG00000111530 | 0.031910247 | 0.037922576 | 0.031627486 | 0.026734871 |
| ENSG00000178234 | 0.061419486 | 0.042705495 | 0.04476039  | 0.043424639 |
| ENSG00000169213 | 0.019989704 | 0.025866148 | 0.024922451 | 0.0256996   |
| ENSG00000175352 | 0.014098185 | 0.025105517 | 0.025072827 | 0.01388615  |
| ENSG00000149596 | 0.015742082 | 0.024607949 | 0.024562613 | 0.014320935 |
| ENSG00000121764 | 0.0162749   | 0.024635156 | 0.026303486 | 0.014977735 |
| ENSG00000143553 | 0.027573642 | 0.032281601 | 0.029307545 | 0.027016634 |
| ENSG00000107938 | 0.055764016 | 0.058687761 | 0.043378497 | 0.040699327 |
| ENSG00000092929 | 0.030141063 | 0.034360828 | 0.038138718 | 0.028433687 |
| ENSG00000151092 | 0.034678093 | 0.035309904 | 0.034597954 | 0.028546305 |
| ENSG00000171408 | 0.017873507 | 0.026564626 | 0.026386    | 0.016743491 |
| ENSG00000213185 | 0.047190521 | 0.041508107 | 0.037277589 | 0.033392069 |
| ENSG00000124939 | 0.016285651 | 0.024920907 | 0.024747148 | 0.015236561 |
| ENSG00000146383 | 0.01584404  | 0.025215996 | 0.024823644 | 0.017663149 |
| ENSG00000197561 | 0.02287833  | 0.02757511  | 0.029394354 | 0.019357839 |
| ENSG00000140543 | 0.020879515 | 0.026372399 | 0.02956145  | 0.019312999 |
| ENSG00000140563 | 0.11790507  | 0.076782258 | 0.078091667 | 0.088576241 |
| ENSG00000138061 | 0.099480908 | 0.110522667 | 0.078132653 | 0.084726091 |
| ENSG00000182931 | 0.01680459  | 0.024308268 | 0.024830903 | 0.015131592 |
| ENSG00000222028 | 0.016730884 | 0.02558808  | 0.026637165 | 0.016452105 |
| ENSG00000171475 | 0.020242468 | 0.028772547 | 0.033654775 | 0.023771076 |
| ENSG00000131100 | 0.023576467 | 0.028674176 | 0.033504715 | 0.023847617 |
| ENSG00000181785 | 0.016117172 | 0.026323893 | 0.024803031 | 0.014416659 |
| ENSG00000071082 | 0.013483864 | 0.023784298 | 0.023579082 | 0.015443832 |
| ENSG00000038219 | 0.019088495 | 0.025568824 | 0.026638595 | 0.017564319 |
| ENSG00000187193 | 0.074673917 | 0.078144563 | 0.083052622 | 0.078574806 |



|                 |             |             |             |             |
|-----------------|-------------|-------------|-------------|-------------|
| ENSG00000085760 | 0.02639982  | 0.030750338 | 0.027237289 | 0.02431613  |
| ENSG00000112799 | 0.039577291 | 0.037515506 | 0.040703569 | 0.043219806 |
| ENSG00000099194 | 0.027083446 | 0.027494157 | 0.02595263  | 0.022093861 |
| ENSG00000198342 | 0.027161469 | 0.031674847 | 0.02803677  | 0.021955142 |
| ENSG00000142973 | 0.015541047 | 0.024556867 | 0.024465677 | 0.014595998 |
| ENSG00000085415 | 0.033192457 | 0.034679068 | 0.033161912 | 0.027165218 |
| ENSG00000151835 | 0.043930225 | 0.043441495 | 0.037300006 | 0.049267217 |
| ENSG00000188976 | 0.030499139 | 0.031185954 | 0.031340754 | 0.024984356 |
| ENSG00000158445 | 0.015866019 | 0.025360616 | 0.025779448 | 0.015212373 |
| ENSG00000179134 | 0.024115926 | 0.030088049 | 0.037337407 | 0.026737407 |
| ENSG00000168806 | 0.035041106 | 0.04010981  | 0.039336689 | 0.033888016 |
| ENSG00000175087 | 0.035484507 | 0.037094787 | 0.037783232 | 0.036207116 |
| ENSG00000157617 | 0.03965104  | 0.033641882 | 0.033957155 | 0.033878313 |
| ENSG00000121742 | 0.01644616  | 0.026307535 | 0.024753873 | 0.015079965 |
| ENSG00000197932 | 0.024933572 | 0.028734784 | 0.030438874 | 0.021976776 |
| ENSG00000104341 | 0.144942491 | 0.09915858  | 0.09650415  | 0.105910368 |
| ENSG00000105325 | 0.022895241 | 0.027864964 | 0.027547736 | 0.019562546 |
| ENSG00000060762 | 0.031129402 | 0.039625349 | 0.032794413 | 0.035149617 |
| ENSG00000115297 | 0.017367927 | 0.024955457 | 0.025354928 | 0.015845845 |
| ENSG00000140577 | 0.028848614 | 0.031278775 | 0.037522346 | 0.025691249 |
| ENSG00000157613 | 0.043591114 | 0.040119936 | 0.029863537 | 0.033713924 |
| ENSG00000185963 | 0.014839982 | 0.026131192 | 0.024655804 | 0.016256329 |
| ENSG00000160654 | 0.015238823 | 0.025472526 | 0.02494804  | 0.01481941  |
| ENSG00000065491 | 0.020724213 | 0.031117048 | 0.030994515 | 0.024241578 |
| ENSG00000180855 | 0.043982262 | 0.038650356 | 0.046351387 | 0.033382024 |
| ENSG00000038002 | 0.049544214 | 0.042811697 | 0.039053308 | 0.030474536 |
| ENSG00000133895 | 0.015505045 | 0.025687307 | 0.025138038 | 0.01530802  |
| ENSG00000104763 | 0.015487116 | 0.026050081 | 0.024791567 | 0.01578467  |
| ENSG00000116221 | 0.025693821 | 0.030262869 | 0.030540281 | 0.018846377 |
| ENSG00000152413 | 0.060912234 | 0.056167787 | 0.052994893 | 0.048420101 |
| ENSG00000082701 | 0.024185508 | 0.029320406 | 0.034679507 | 0.024567123 |
| ENSG00000000457 | 0.021280124 | 0.026781681 | 0.025458215 | 0.020888247 |
| ENSG00000087258 | 0.016429595 | 0.024779598 | 0.024374814 | 0.014798816 |
| ENSG00000186523 | 0.02513179  | 0.029787408 | 0.0288434   | 0.023011924 |
| ENSG00000148541 | 0.015841488 | 0.025950886 | 0.024738774 | 0.016495749 |
| ENSG00000155975 | 0.031795577 | 0.038657705 | 0.032099058 | 0.044200794 |
| ENSG00000123485 | 0.05137989  | 0.039020357 | 0.040490177 | 0.038896092 |
| ENSG00000109184 | 0.037969234 | 0.03694994  | 0.033532458 | 0.033664357 |
| ENSG00000077809 | 0.035057477 | 0.037308439 | 0.03254752  | 0.024349083 |
| ENSG00000155893 | 0.021408459 | 0.02928617  | 0.027156106 | 0.02211257  |
| ENSG00000196476 | 0.017302594 | 0.025144975 | 0.024837962 | 0.016176912 |
| ENSG00000188868 | 0.019029488 | 0.026525077 | 0.024675428 | 0.017871563 |
| ENSG00000166126 | 0.01626539  | 0.025122445 | 0.024728196 | 0.014991632 |
| ENSG00000092964 | 0.050701261 | 0.073101185 | 0.058560708 | 0.06010773  |
| ENSG00000091664 | 0.015361695 | 0.0249986   | 0.02501125  | 0.014837142 |
| ENSG00000159346 | 0.021212249 | 0.028233713 | 0.028425548 | 0.019750597 |
| ENSG00000146083 | 0.025115995 | 0.028348584 | 0.031015595 | 0.026160592 |
| ENSG00000167702 | 0.03526414  | 0.038237438 | 0.039744992 | 0.035444864 |
| ENSG00000165283 | 0.028568129 | 0.033171683 | 0.029939649 | 0.022431793 |
| ENSG00000105993 | 0.032752115 | 0.045875942 | 0.035268814 | 0.03363995  |
| ENSG00000234906 | 0.036930979 | 0.030181427 | 0.031028149 | 0.025249859 |
| ENSG00000109790 | 0.041854458 | 0.041423622 | 0.038851268 | 0.035264369 |
| ENSG00000080618 | 0.017719053 | 0.026150896 | 0.024675507 | 0.016791619 |
| ENSG00000026950 | 0.044141218 | 0.037310664 | 0.035823378 | 0.037046626 |

|                 |             |             |             |             |
|-----------------|-------------|-------------|-------------|-------------|
| ENSG00000165288 | 0.033634327 | 0.036085718 | 0.031675279 | 0.032872849 |
| ENSG00000162437 | 0.053586897 | 0.040438752 | 0.024714714 | 0.015648915 |
| ENSG00000175806 | 0.046596457 | 0.037167765 | 0.037118178 | 0.03812944  |
| ENSG00000132792 | 0.02532567  | 0.029300974 | 0.028580208 | 0.024650654 |
| ENSG00000123908 | 0.039572592 | 0.04105996  | 0.039273649 | 0.03477687  |
| ENSG00000221944 | 0.027784674 | 0.032061183 | 0.030176419 | 0.021171635 |
| ENSG00000064703 | 0.039287416 | 0.044718229 | 0.046737937 | 0.046055037 |
| ENSG00000111199 | 0.015177925 | 0.025323464 | 0.025174113 | 0.014301141 |
| ENSG00000106638 | 0.027572967 | 0.031329642 | 0.031781144 | 0.026239769 |
| ENSG00000133687 | 0.019909893 | 0.025745923 | 0.024683626 | 0.015915799 |
| ENSG00000198523 | 0.014985023 | 0.024162203 | 0.02484124  | 0.014693141 |
| ENSG00000166199 | 0.026641133 | 0.032227121 | 0.035033858 | 0.023635825 |
| ENSG00000167770 | 0.026049967 | 0.030950686 | 0.039074422 | 0.031176509 |
| ENSG00000130725 | 0.023158238 | 0.026640886 | 0.030008655 | 0.024092002 |
| ENSG00000166946 | 0.022645617 | 0.034630094 | 0.030377323 | 0.027665741 |
| ENSG00000198642 | 0.038067088 | 0.038823574 | 0.036501108 | 0.030787173 |
| ENSG00000187583 | 0.016389619 | 0.027585435 | 0.026580059 | 0.019635719 |
| ENSG00000100297 | 0.033645321 | 0.031013396 | 0.036977652 | 0.033092265 |
| ENSG00000156239 | 0.034081858 | 0.035708431 | 0.031982865 | 0.024058633 |
| ENSG00000135372 | 0.027775156 | 0.03452657  | 0.030494879 | 0.023433756 |
| ENSG00000175318 | 0.01421073  | 0.024093774 | 0.025199609 | 0.01437479  |
| ENSG00000144579 | 0.020788675 | 0.039950653 | 0.028418044 | 0.030001201 |
| ENSG00000117395 | 0.027076746 | 0.031893119 | 0.028793721 | 0.028238443 |
| ENSG00000177721 | 0.047699839 | 0.051333673 | 0.051424892 | 0.054715457 |
| ENSG00000042980 | 0.015769845 | 0.025574654 | 0.025693731 | 0.017030003 |
| ENSG00000221938 | 0.015932187 | 0.023922578 | 0.025148332 | 0.015135288 |
| ENSG00000112282 | 0.048512634 | 0.049245932 | 0.045740034 | 0.083081549 |
| ENSG00000175093 | 0.015672368 | 0.025437324 | 0.026004721 | 0.015955935 |
| ENSG00000137106 | 0.035286665 | 0.034950275 | 0.035551074 | 0.034171396 |
| ENSG00000172828 | 0.021478618 | 0.029571423 | 0.026727227 | 0.025541154 |
| ENSG00000171094 | 0.015510628 | 0.025582093 | 0.026143753 | 0.016187078 |
| ENSG00000042813 | 0.018328125 | 0.024949437 | 0.025314378 | 0.016467829 |
| ENSG00000166171 | 0.036025781 | 0.038914108 | 0.034676913 | 0.029836177 |
| ENSG00000109084 | 0.034789766 | 0.034769558 | 0.035556398 | 0.030096802 |
| ENSG00000154639 | 0.01792732  | 0.025192263 | 0.025019151 | 0.023602098 |
| ENSG00000189013 | 0.014867796 | 0.023608636 | 0.025417329 | 0.015413273 |
| ENSG00000139921 | 0.028838084 | 0.033397606 | 0.031295319 | 0.020898345 |
| ENSG00000177047 | 0.016556242 | 0.027148932 | 0.025392062 | 0.015030185 |
| ENSG00000176907 | 0.015944319 | 0.024564275 | 0.025457903 | 0.016634517 |
| ENSG00000186117 | 0.017349548 | 0.027405699 | 0.024548542 | 0.016875638 |
| ENSG00000196387 | 0.031437695 | 0.041060951 | 0.045164428 | 0.034189253 |
| ENSG00000101977 | 0.017200697 | 0.025653428 | 0.025483423 | 0.018434162 |
| ENSG00000127903 | 0.015565849 | 0.024964022 | 0.024488297 | 0.015567886 |
| ENSG00000103522 | 0.027470463 | 0.029985433 | 0.027616394 | 0.018452422 |
| ENSG00000141252 | 0.017676216 | 0.028403186 | 0.026181505 | 0.017104343 |
| ENSG00000155363 | 0.028594642 | 0.038573452 | 0.039266452 | 0.038179835 |
| ENSG00000127780 | 0.018219626 | 0.02577914  | 0.025452828 | 0.018268512 |
| ENSG00000184029 | 0.015627511 | 0.024707255 | 0.025177905 | 0.016199478 |
| ENSG00000131508 | 0.038560631 | 0.046917881 | 0.037235733 | 0.029875345 |
| ENSG00000197734 | 0.019658837 | 0.028678645 | 0.026412128 | 0.018482986 |
| ENSG00000140557 | 0.020589618 | 0.024695716 | 0.026229632 | 0.02034394  |
| ENSG00000127364 | 0.015417212 | 0.024978888 | 0.025058486 | 0.014343474 |
| ENSG00000101003 | 0.038796089 | 0.035072727 | 0.035762456 | 0.035416938 |
| ENSG00000227057 | 0.032141612 | 0.029643514 | 0.033289631 | 0.03309129  |

|                 |             |             |             |             |
|-----------------|-------------|-------------|-------------|-------------|
| ENSG00000198060 | 0.041092568 | 0.045365232 | 0.054382507 | 0.043284196 |
| ENSG00000104808 | 0.030864255 | 0.032406986 | 0.029880215 | 0.057645883 |
| ENSG00000186335 | 0.015449108 | 0.024921558 | 0.027124398 | 0.015545532 |
| ENSG00000184324 | 0.037789013 | 0.027339994 | 0.029172072 | 0.02698578  |
| ENSG00000143627 | 0.015750849 | 0.025077495 | 0.02520277  | 0.014892526 |
| ENSG00000136718 | 0.025854599 | 0.029942913 | 0.028834379 | 0.021590563 |
| ENSG00000163814 | 0.044661638 | 0.035277149 | 0.034663635 | 0.050177608 |
| ENSG00000164188 | 0.016136892 | 0.025346223 | 0.025348551 | 0.017965518 |
| ENSG00000146267 | 0.015732005 | 0.026423428 | 0.025308167 | 0.014891923 |
| ENSG00000079308 | 0.017075922 | 0.024928362 | 0.0249751   | 0.018828652 |
| ENSG00000167508 | 0.02748289  | 0.028389816 | 0.035894151 | 0.031951717 |
| ENSG00000175077 | 0.015108086 | 0.025187623 | 0.025239912 | 0.015437313 |
| ENSG00000052850 | 0.015944878 | 0.025276422 | 0.024302015 | 0.017023289 |
| ENSG00000205038 | 0.057250115 | 0.079530561 | 0.068095198 | 0.059600832 |
| ENSG00000118434 | 0.015220483 | 0.024740691 | 0.024687964 | 0.015574502 |
| ENSG00000176366 | 0.038715199 | 0.042950199 | 0.033634624 | 0.032798672 |
| ENSG00000183475 | 0.019655744 | 0.027437548 | 0.027125718 | 0.01962227  |
| ENSG00000120903 | 0.016490664 | 0.025397195 | 0.025041807 | 0.017257898 |
| ENSG00000030110 | 0.032940151 | 0.039643584 | 0.043355818 | 0.030248404 |
| ENSG00000176920 | 0.015293779 | 0.024697371 | 0.025470779 | 0.015404342 |
| ENSG00000181751 | 0.051474055 | 0.042639635 | 0.037077838 | 0.033772326 |
| ENSG00000213096 | 0.038313139 | 0.038828676 | 0.032307349 | 0.031146132 |
| ENSG00000176927 | 0.015256651 | 0.024621827 | 0.024510344 | 0.014753245 |
| ENSG00000119707 | 0.03057143  | 0.034652477 | 0.030852762 | 0.024871229 |
| ENSG00000152234 | 0.019698567 | 0.027202987 | 0.025630319 | 0.01760753  |
| ENSG00000112218 | 0.045509475 | 0.042120724 | 0.039113705 | 0.038929848 |
| ENSG00000135916 | 0.058483657 | 0.04186114  | 0.053596094 | 0.050007758 |
| ENSG00000162727 | 0.016262191 | 0.024542531 | 0.024903976 | 0.015578792 |
| ENSG00000139278 | 0.03443639  | 0.038843229 | 0.04173135  | 0.036520863 |
| ENSG00000135144 | 0.039009721 | 0.033539791 | 0.030611001 | 0.033569567 |
| ENSG00000132388 | 0.037854652 | 0.047882804 | 0.038107123 | 0.040741097 |
| ENSG00000124766 | 0.049443945 | 0.045550319 | 0.055484597 | 0.054949047 |
| ENSG00000197620 | 0.022415379 | 0.03480742  | 0.033259083 | 0.02442681  |
| ENSG00000167861 | 0.026571583 | 0.026569929 | 0.028111861 | 0.020197969 |
| ENSG00000187122 | 0.042721155 | 0.029846713 | 0.026264251 | 0.020814856 |
| ENSG00000136546 | 0.018955554 | 0.024875804 | 0.025914734 | 0.015871141 |
| ENSG00000149262 | 0.03817758  | 0.050452858 | 0.035070288 | 0.038941986 |
| ENSG00000090857 | 0.036268075 | 0.042509752 | 0.044072443 | 0.035176893 |
| ENSG00000047365 | 0.026074537 | 0.02943185  | 0.030047999 | 0.027521776 |
| ENSG00000148672 | 0.023264322 | 0.030437825 | 0.030839373 | 0.021397134 |
| ENSG00000104388 | 0.027267527 | 0.031736688 | 0.035073479 | 0.02624582  |
| ENSG00000169439 | 0.017598398 | 0.025987915 | 0.025765493 | 0.016132561 |
| ENSG00000089486 | 0.06413579  | 0.042183754 | 0.040634707 | 0.045950177 |
| ENSG00000145217 | 0.014976857 | 0.02559895  | 0.024687637 | 0.016006931 |
| ENSG00000096093 | 0.046099583 | 0.044113987 | 0.039031574 | 0.03624329  |
| ENSG00000140265 | 0.035899564 | 0.034452629 | 0.037470728 | 0.023326715 |
| ENSG00000139370 | 0.028801815 | 0.032161829 | 0.035553683 | 0.031851718 |
| ENSG00000253873 | 0.02134135  | 0.026410593 | 0.027104797 | 0.018575858 |
| ENSG00000196505 | 0.028937924 | 0.034063638 | 0.031012736 | 0.025196867 |
| ENSG00000158113 | 0.018436804 | 0.027233154 | 0.025605672 | 0.017860115 |
| ENSG00000186470 | 0.061167303 | 0.045461359 | 0.055306416 | 0.037434524 |
| ENSG00000122644 | 0.061227796 | 0.062460881 | 0.061332386 | 0.048785221 |
| ENSG00000162552 | 0.024329401 | 0.032846123 | 0.027717859 | 0.031066245 |
| ENSG00000136527 | 0.029812391 | 0.033156961 | 0.035657488 | 0.031521044 |

|                 |             |             |             |             |
|-----------------|-------------|-------------|-------------|-------------|
| ENSG00000136938 | 0.021627796 | 0.027159527 | 0.025318095 | 0.016260137 |
| ENSG00000106477 | 0.035359903 | 0.039828767 | 0.034277093 | 0.030451875 |
| ENSG00000125835 | 0.02768816  | 0.029870913 | 0.028745964 | 0.026031947 |
| ENSG00000171864 | 0.016392226 | 0.025777547 | 0.024440347 | 0.015923819 |
| ENSG00000196787 | 0.01644766  | 0.025557193 | 0.025709323 | 0.016239865 |
| ENSG00000149968 | 0.016145193 | 0.024969054 | 0.024644673 | 0.015683399 |
| ENSG00000163157 | 0.015699946 | 0.025333883 | 0.026044678 | 0.016273599 |
| ENSG00000174990 | 0.016139371 | 0.025723779 | 0.025226688 | 0.017859871 |
| ENSG00000155530 | 0.01629544  | 0.025292211 | 0.025098481 | 0.01501614  |
| ENSG00000006704 | 0.015412368 | 0.025104399 | 0.024372776 | 0.015287083 |
| ENSG00000072364 | 0.022974429 | 0.02716232  | 0.030316811 | 0.018753134 |
| ENSG00000101811 | 0.028669807 | 0.033528115 | 0.02892205  | 0.031133706 |
| ENSG00000130159 | 0.027195878 | 0.032063766 | 0.028570749 | 0.023360815 |
| ENSG00000138750 | 0.029743281 | 0.033254841 | 0.030833964 | 0.029350142 |
| ENSG00000005812 | 0.030775822 | 0.038916091 | 0.04072717  | 0.033413669 |
| ENSG00000143125 | 0.015037339 | 0.025445297 | 0.024788726 | 0.014875725 |
| ENSG00000148053 | 0.01544085  | 0.024920066 | 0.025349836 | 0.015711862 |
| ENSG00000177462 | 0.014425452 | 0.024401602 | 0.024633124 | 0.014443155 |
| ENSG00000213445 | 0.015118771 | 0.02549322  | 0.02561742  | 0.016823449 |
| ENSG00000111269 | 0.030038872 | 0.037411236 | 0.033415934 | 0.032938431 |
| ENSG00000104177 | 0.016772201 | 0.026293522 | 0.025975874 | 0.016634382 |
| ENSG00000172985 | 0.015692415 | 0.025672479 | 0.025038575 | 0.015201252 |
| ENSG00000126368 | 0.020906918 | 0.029028668 | 0.030410777 | 0.025265707 |
| ENSG00000185928 | 0.047538815 | 0.044129787 | 0.033473893 | 0.031259163 |
| ENSG00000145088 | 0.061192802 | 0.044771487 | 0.047237271 | 0.035839665 |
| ENSG00000103018 | 0.024084858 | 0.029299268 | 0.029324167 | 0.024271688 |
| ENSG00000181965 | 0.01579432  | 0.025448109 | 0.025100937 | 0.015366441 |
| ENSG00000172869 | 0.033582319 | 0.043496206 | 0.033123219 | 0.036778563 |
| ENSG00000140025 | 0.015572244 | 0.026126882 | 0.025167954 | 0.014739378 |
| ENSG00000110660 | 0.032571383 | 0.034785596 | 0.038179049 | 0.028165982 |
| ENSG00000100109 | 0.02818225  | 0.037195936 | 0.038956779 | 0.025585118 |
| ENSG00000198758 | 0.016123414 | 0.026573494 | 0.025162424 | 0.014966119 |
| ENSG00000178980 | 0.030897987 | 0.035032642 | 0.03466678  | 0.02617313  |
| ENSG00000091536 | 0.017453466 | 0.025837025 | 0.025575089 | 0.015901679 |
| ENSG00000134759 | 0.02603553  | 0.028873008 | 0.028277396 | 0.025290273 |
| ENSG00000100365 | 0.066640488 | 0.055380756 | 0.053698687 | 0.057744881 |
| ENSG00000145029 | 0.015841912 | 0.024241175 | 0.024588948 | 0.015293321 |
| ENSG00000100097 | 0.037212278 | 0.032634405 | 0.034186286 | 0.036723685 |
| ENSG00000157456 | 0.037774539 | 0.033108411 | 0.033359245 | 0.027014094 |
| ENSG00000062650 | 0.023990073 | 0.031256651 | 0.031970756 | 0.023027995 |
| ENSG00000184840 | 0.030377766 | 0.032282244 | 0.037958595 | 0.030253159 |
| ENSG00000177076 | 0.017248967 | 0.025454552 | 0.026956093 | 0.015327361 |
| ENSG00000167670 | 0.037098281 | 0.0412147   | 0.036569085 | 0.028341309 |
| ENSG00000129657 | 0.032038896 | 0.036047457 | 0.040457007 | 0.031056624 |
| ENSG00000116663 | 0.036632085 | 0.041183466 | 0.041551467 | 0.035643956 |
| ENSG00000132466 | 0.026468609 | 0.036285782 | 0.030115246 | 0.027006697 |
| ENSG00000142619 | 0.019103131 | 0.028872812 | 0.027894758 | 0.017454724 |
| ENSG00000171401 | 0.017390336 | 0.02617186  | 0.02434574  | 0.015069543 |
| ENSG00000107551 | 0.041427674 | 0.042198428 | 0.042323316 | 0.04331706  |
| ENSG00000103415 | 0.016643134 | 0.026099542 | 0.02528744  | 0.015714669 |
| ENSG00000090924 | 0.026734055 | 0.031726802 | 0.037883941 | 0.030818896 |
| ENSG00000101972 | 0.028358932 | 0.035537552 | 0.030443057 | 0.027615535 |
| ENSG00000139648 | 0.015475388 | 0.025035936 | 0.024526063 | 0.015284463 |
| ENSG00000152463 | 0.032902733 | 0.033567163 | 0.03477685  | 0.02924344  |

|                 |             |             |             |             |
|-----------------|-------------|-------------|-------------|-------------|
| ENSG00000159199 | 0.028966189 | 0.030524078 | 0.029864687 | 0.023208039 |
| ENSG00000138081 | 0.031159341 | 0.036479923 | 0.032535123 | 0.027835419 |
| ENSG00000158486 | 0.01640535  | 0.024610864 | 0.025218682 | 0.016128012 |
| ENSG00000101096 | 0.015611038 | 0.025131219 | 0.024760033 | 0.014687053 |
| ENSG00000107643 | 0.021028635 | 0.02720609  | 0.032167211 | 0.020773363 |
| ENSG00000196420 | 0.015304318 | 0.026627352 | 0.026797757 | 0.017323779 |
| ENSG00000196911 | 0.031993928 | 0.034545612 | 0.046503673 | 0.036202678 |
| ENSG00000168484 | 0.017173309 | 0.025077185 | 0.024850705 | 0.015995491 |
| ENSG00000110344 | 0.024856146 | 0.031329979 | 0.028953756 | 0.017674034 |
| ENSG00000187170 | 0.042533138 | 0.028383691 | 0.026371916 | 0.02511108  |
| ENSG00000105127 | 0.033527397 | 0.039442596 | 0.042682685 | 0.032281776 |
| ENSG00000050426 | 0.02559958  | 0.028297312 | 0.029460672 | 0.026023178 |
| ENSG00000183010 | 0.035042535 | 0.035260736 | 0.040185199 | 0.036939369 |
| ENSG00000138684 | 0.017423305 | 0.025041881 | 0.026748792 | 0.015651626 |
| ENSG00000196616 | 0.014501444 | 0.024741887 | 0.024497736 | 0.01389029  |
| ENSG00000172322 | 0.014975005 | 0.025055919 | 0.024214709 | 0.014589334 |
| ENSG00000196131 | 0.01485094  | 0.025976639 | 0.024404161 | 0.016746098 |
| ENSG00000117069 | 0.01686376  | 0.026622656 | 0.025085371 | 0.015530519 |
| ENSG00000120729 | 0.020985194 | 0.027838865 | 0.029313441 | 0.018117996 |
| ENSG00000221988 | 0.015562118 | 0.026434331 | 0.024264603 | 0.015822388 |
| ENSG00000134146 | 0.027085241 | 0.032577454 | 0.031104378 | 0.022308503 |
| ENSG00000221900 | 0.018131663 | 0.025055874 | 0.025126175 | 0.016775722 |
| ENSG00000126953 | 0.034162519 | 0.034473033 | 0.034183476 | 0.032633357 |
| ENSG00000011590 | 0.059319557 | 0.04063662  | 0.042287981 | 0.048510679 |
| ENSG00000143228 | 0.035355243 | 0.031688655 | 0.031825675 | 0.028502876 |
| ENSG00000130770 | 0.053770106 | 0.040235938 | 0.045268733 | 0.049545901 |
| ENSG00000187559 | 0.015320224 | 0.024818814 | 0.024487335 | 0.015060179 |
| ENSG00000172236 | 0.030356382 | 0.027911154 | 0.025322221 | 0.016458767 |
| ENSG00000171033 | 0.020799139 | 0.027385168 | 0.027225414 | 0.018300582 |
| ENSG00000135940 | 0.019808769 | 0.026914538 | 0.027079735 | 0.016942734 |
| ENSG00000179476 | 0.030012638 | 0.032922795 | 0.031513323 | 0.026792535 |
| ENSG00000118733 | 0.020130807 | 0.025131481 | 0.024420656 | 0.01553004  |
| ENSG00000108375 | 0.073375181 | 0.063526338 | 0.057567986 | 0.064037406 |
| ENSG00000152223 | 0.044976395 | 0.043691079 | 0.040308189 | 0.033209637 |
| ENSG00000103154 | 0.016444335 | 0.026452222 | 0.025193724 | 0.016426307 |
| ENSG00000171505 | 0.018730321 | 0.026304715 | 0.025712991 | 0.017950527 |
| ENSG00000044446 | 0.032113904 | 0.038640843 | 0.037385733 | 0.026510034 |
| ENSG00000141570 | 0.016722502 | 0.027586897 | 0.025425985 | 0.015990842 |
| ENSG00000089012 | 0.048529134 | 0.04886807  | 0.02543708  | 0.030761582 |
| ENSG00000063515 | 0.01634389  | 0.025891168 | 0.024406685 | 0.01670626  |
| ENSG00000214681 | 0.013478339 | 0.023637243 | 0.023699304 | 0.014368353 |
| ENSG00000138346 | 0.049499341 | 0.049495953 | 0.038539465 | 0.038621921 |
| ENSG00000134297 | 0.035483777 | 0.04597964  | 0.036186298 | 0.03053045  |
| ENSG00000113070 | 0.029319587 | 0.041276393 | 0.044461242 | 0.036478231 |
| ENSG00000133247 | 0.042287514 | 0.039101999 | 0.035017838 | 0.036225552 |
| ENSG00000138463 | 0.034593734 | 0.034584814 | 0.032214396 | 0.02661456  |
| ENSG00000012174 | 0.021011945 | 0.030437117 | 0.029527423 | 0.018484284 |
| ENSG00000100092 | 0.026480107 | 0.03223778  | 0.030960493 | 0.02805188  |
| ENSG00000112941 | 0.043123632 | 0.045413255 | 0.04009763  | 0.032314063 |
| ENSG00000145757 | 0.015332896 | 0.024637881 | 0.02489159  | 0.014044877 |
| ENSG00000087206 | 0.024209214 | 0.03206834  | 0.030571689 | 0.022677902 |
| ENSG00000102871 | 0.028113101 | 0.054343138 | 0.037833907 | 0.040417327 |
| ENSG00000110074 | 0.034387598 | 0.033604024 | 0.028343711 | 0.027919847 |
| ENSG00000120800 | 0.044250841 | 0.035668229 | 0.033520513 | 0.034623077 |

|                 |             |             |             |             |
|-----------------|-------------|-------------|-------------|-------------|
| ENSG00000136213 | 0.060067034 | 0.047803616 | 0.047003092 | 0.049940174 |
| ENSG00000154229 | 0.016248553 | 0.025018082 | 0.024587878 | 0.015467378 |
| ENSG00000187630 | 0.035402617 | 0.039842041 | 0.039233046 | 0.044625651 |
| ENSG00000186439 | 0.018676128 | 0.025340834 | 0.028104344 | 0.015502935 |
| ENSG00000108702 | 0.106054303 | 0.051818228 | 0.087048159 | 0.032293036 |
| ENSG00000127515 | 0.015437918 | 0.024349193 | 0.024880633 | 0.014771995 |
| ENSG00000115085 | 0.044157009 | 0.037522742 | 0.03670002  | 0.057430072 |
| ENSG00000162631 | 0.0170356   | 0.025568455 | 0.025402216 | 0.017279422 |
| ENSG00000167842 | 0.032111348 | 0.037575481 | 0.039946664 | 0.030941699 |
| ENSG00000154035 | 0.017170002 | 0.025941143 | 0.025716021 | 0.016509205 |
| ENSG00000109911 | 0.04081963  | 0.03866057  | 0.034470517 | 0.029297141 |
| ENSG00000197629 | 0.099324391 | 0.09634083  | 0.075764432 | 0.100634465 |
| ENSG00000198483 | 0.017439439 | 0.026706884 | 0.027431349 | 0.015266438 |
| ENSG00000095777 | 0.015046183 | 0.024585218 | 0.024234815 | 0.015400823 |
| ENSG00000139974 | 0.031620904 | 0.037634716 | 0.029873905 | 0.025171576 |
| ENSG00000128915 | 0.028892094 | 0.037877485 | 0.02995461  | 0.023574855 |
| ENSG00000154099 | 0.015651145 | 0.024755109 | 0.024514879 | 0.014307371 |
| ENSG00000130558 | 0.017239141 | 0.025371075 | 0.025423057 | 0.014998332 |
| ENSG00000253731 | 0.01623771  | 0.0254693   | 0.024766718 | 0.015695099 |
| ENSG00000147419 | 0.028787304 | 0.032459591 | 0.032230439 | 0.020981443 |
| ENSG00000179151 | 0.021185147 | 0.028331928 | 0.030658763 | 0.01965187  |
| ENSG00000188191 | 0.018897325 | 0.026470359 | 0.031607527 | 0.020066397 |
| ENSG00000117586 | 0.0872805   | 0.063607118 | 0.068219923 | 0.081511516 |
| ENSG00000165555 | 0.015203156 | 0.024498851 | 0.024805805 | 0.016069313 |
| ENSG00000177174 | 0.014802902 | 0.025773764 | 0.024509198 | 0.014852406 |
| ENSG00000183729 | 0.015540025 | 0.024866336 | 0.025254227 | 0.014751696 |
| ENSG00000178460 | 0.01419993  | 0.025507314 | 0.024819489 | 0.014898945 |
| ENSG00000157985 | 0.056848781 | 0.039173588 | 0.038082533 | 0.038900698 |
| ENSG00000170545 | 0.032387295 | 0.030986212 | 0.038158897 | 0.033342991 |
| ENSG00000067182 | 0.065658755 | 0.048356601 | 0.042316303 | 0.059858819 |
| ENSG00000235173 | 0.036879807 | 0.035687296 | 0.032152599 | 0.035835284 |
| ENSG00000170364 | 0.033536815 | 0.034467678 | 0.041980054 | 0.044239579 |
| ENSG00000180999 | 0.014442104 | 0.02561879  | 0.025251314 | 0.015037918 |
| ENSG00000139641 | 0.031784403 | 0.035751693 | 0.029683274 | 0.027118512 |
| ENSG00000143772 | 0.070942709 | 0.052597061 | 0.050831976 | 0.050272321 |
| ENSG00000089847 | 0.063265245 | 0.047847393 | 0.036454358 | 0.049272458 |
| ENSG00000159189 | 0.016931031 | 0.025055323 | 0.024398525 | 0.015415019 |
| ENSG00000103353 | 0.025950304 | 0.03236545  | 0.029650224 | 0.024119486 |
| ENSG00000186185 | 0.023908162 | 0.026294848 | 0.026967153 | 0.018170571 |
| ENSG00000186265 | 0.054099922 | 0.05091084  | 0.037567505 | 0.041218332 |
| ENSG00000103479 | 0.028826834 | 0.038221115 | 0.033500817 | 0.027671092 |
| ENSG00000101343 | 0.035033576 | 0.030930473 | 0.02946408  | 0.023839767 |
| ENSG00000116194 | 0.017042726 | 0.025229676 | 0.025178183 | 0.017838519 |
| ENSG00000185973 | 0.020765955 | 0.028459552 | 0.025500281 | 0.021142494 |
| ENSG00000185104 | 0.038954894 | 0.041794961 | 0.038400224 | 0.0355598   |
| ENSG00000115919 | 0.041895168 | 0.037012109 | 0.035469545 | 0.034213425 |
| ENSG00000196083 | 0.01681609  | 0.026353268 | 0.025155586 | 0.016802167 |
| ENSG00000125457 | 0.026660864 | 0.033596943 | 0.031510996 | 0.023010578 |
| ENSG00000135315 | 0.020057267 | 0.031416655 | 0.027790865 | 0.019504427 |
| ENSG00000147613 | 0.015537305 | 0.025911536 | 0.02455604  | 0.014799047 |
| ENSG00000178301 | 0.027024166 | 0.030919455 | 0.02818318  | 0.02367248  |
| ENSG00000169035 | 0.015172018 | 0.025038275 | 0.024119517 | 0.014855371 |
| ENSG00000187054 | 0.018805361 | 0.026072834 | 0.026613066 | 0.016473003 |
| ENSG00000136144 | 0.021767663 | 0.033485962 | 0.030949479 | 0.020455311 |

|                 |             |             |             |             |
|-----------------|-------------|-------------|-------------|-------------|
| ENSG00000153006 | 0.025161039 | 0.030270181 | 0.029826742 | 0.023193771 |
| ENSG00000214014 | 0.025792092 | 0.032083275 | 0.034802152 | 0.027366434 |
| ENSG00000111331 | 0.075619284 | 0.050913206 | 0.045361021 | 0.047136705 |
| ENSG00000107447 | 0.019280755 | 0.028078444 | 0.028027612 | 0.049082047 |
| ENSG00000168300 | 0.04578383  | 0.044102879 | 0.036410759 | 0.036683777 |
| ENSG00000182890 | 0.030747174 | 0.03913026  | 0.033227736 | 0.027929562 |
| ENSG00000137707 | 0.014889439 | 0.026528687 | 0.025001331 | 0.015920094 |
| ENSG00000124593 | 0.022338667 | 0.027042003 | 0.028290887 | 0.024810891 |
| ENSG00000151806 | 0.04381603  | 0.047631581 | 0.035513934 | 0.041537792 |
| ENSG00000037749 | 0.02920162  | 0.03551619  | 0.036506497 | 0.02334684  |
| ENSG00000175104 | 0.017376188 | 0.025884076 | 0.025479481 | 0.016771619 |
| ENSG00000100504 | 0.087544898 | 0.081451382 | 0.052597452 | 0.066873904 |
| ENSG00000134910 | 0.037649601 | 0.037567203 | 0.037256243 | 0.03406784  |
| ENSG00000241476 | 0.024720315 | 0.024482742 | 0.024699323 | 0.015360466 |
| ENSG00000100483 | 0.031192231 | 0.038175795 | 0.04081727  | 0.033516898 |
| ENSG00000182809 | 0.021355754 | 0.032068098 | 0.027158915 | 0.040697311 |
| ENSG00000127337 | 0.029258507 | 0.031801546 | 0.030463578 | 0.034427624 |
| ENSG00000182180 | 0.027615795 | 0.029358821 | 0.027536564 | 0.02324426  |
| ENSG00000106608 | 0.029288894 | 0.03121801  | 0.039129454 | 0.022984952 |
| ENSG00000004139 | 0.036227104 | 0.037565203 | 0.034069219 | 0.030164787 |
| ENSG00000163932 | 0.026409082 | 0.03303654  | 0.034586706 | 0.021571018 |
| ENSG00000143578 | 0.037806664 | 0.03880253  | 0.030803598 | 0.029834837 |
| ENSG00000135045 | 0.041552972 | 0.047875289 | 0.039449147 | 0.031672249 |
| ENSG00000087586 | 0.044057133 | 0.035474459 | 0.034840532 | 0.031833148 |
| ENSG00000186866 | 0.017753963 | 0.027192531 | 0.025640224 | 0.01792739  |
| ENSG00000131263 | 0.018064379 | 0.025024906 | 0.026000985 | 0.016617508 |
| ENSG00000154080 | 0.014996618 | 0.024658879 | 0.02396722  | 0.014848525 |
| ENSG00000142208 | 0.027280668 | 0.031591894 | 0.033987597 | 0.026423455 |
| ENSG00000145979 | 0.032978054 | 0.035481779 | 0.031369118 | 0.028035411 |
| ENSG00000114062 | 0.018113057 | 0.024821924 | 0.025570446 | 0.019649576 |
| ENSG00000133961 | 0.029646126 | 0.032674612 | 0.033414984 | 0.021092287 |
| ENSG00000173013 | 0.024458774 | 0.030550432 | 0.030304896 | 0.021863989 |
| ENSG00000146872 | 0.025197171 | 0.033298504 | 0.031990107 | 0.024715573 |
| ENSG00000159228 | 0.035484542 | 0.030108852 | 0.02872675  | 0.033871064 |
| ENSG00000134352 | 0.022611492 | 0.027414892 | 0.028033335 | 0.020231037 |
| ENSG00000127948 | 0.026088543 | 0.033201961 | 0.03678798  | 0.028836198 |
| ENSG00000175894 | 0.018648708 | 0.026247633 | 0.025488317 | 0.019059833 |
| ENSG00000021461 | 0.016026479 | 0.025530049 | 0.02495045  | 0.015843409 |
| ENSG00000177733 | 0.026567385 | 0.031913943 | 0.036265456 | 0.031047766 |
| ENSG00000162585 | 0.019526708 | 0.025819084 | 0.026105179 | 0.020667737 |
| ENSG00000198785 | 0.015700324 | 0.025379637 | 0.02442461  | 0.01511563  |
| ENSG00000149922 | 0.015326557 | 0.02481068  | 0.024477956 | 0.017236283 |
| ENSG00000175229 | 0.016998826 | 0.025729289 | 0.025171748 | 0.015376066 |
| ENSG00000143476 | 0.041019308 | 0.039101471 | 0.032786064 | 0.031657157 |
| ENSG00000164651 | 0.016751156 | 0.0258233   | 0.024485827 | 0.014913188 |
| ENSG00000106367 | 0.030757737 | 0.036196104 | 0.034849854 | 0.037463969 |
| ENSG00000149380 | 0.015688956 | 0.024766517 | 0.025153645 | 0.014312116 |
| ENSG00000125863 | 0.031480731 | 0.035458287 | 0.030960023 | 0.023452723 |
| ENSG00000182636 | 0.101545992 | 0.065362088 | 0.063746693 | 0.085295691 |
| ENSG00000141867 | 0.021913407 | 0.034603258 | 0.029116681 | 0.023783212 |
| ENSG00000187017 | 0.016459216 | 0.023902872 | 0.025551022 | 0.015789113 |
| ENSG00000198270 | 0.037723288 | 0.04090227  | 0.036974876 | 0.033294532 |
| ENSG00000165066 | 0.015350983 | 0.025175553 | 0.024994749 | 0.014841417 |
| ENSG00000104972 | 0.042651707 | 0.044572293 | 0.0373103   | 0.03817703  |

|                 |             |             |             |             |
|-----------------|-------------|-------------|-------------|-------------|
| ENSG00000177963 | 0.022853055 | 0.030209996 | 0.038482851 | 0.023543323 |
| ENSG00000119787 | 0.021602702 | 0.026401453 | 0.026706893 | 0.017256839 |
| ENSG00000166396 | 0.020898042 | 0.025788454 | 0.025025527 | 0.016108054 |
| ENSG00000176194 | 0.016742668 | 0.026240694 | 0.025503694 | 0.015777933 |
| ENSG00000144619 | 0.01631425  | 0.024562538 | 0.025372397 | 0.015215339 |
| ENSG00000181896 | 0.032098762 | 0.039011552 | 0.042983372 | 0.02969687  |
| ENSG00000168427 | 0.015329114 | 0.024961333 | 0.024141197 | 0.015072359 |
| ENSG00000059588 | 0.036870379 | 0.037604275 | 0.040136896 | 0.0316823   |
| ENSG00000236287 | 0.030031916 | 0.03470767  | 0.030302546 | 0.023432911 |
| ENSG00000122482 | 0.016722586 | 0.024473974 | 0.024981731 | 0.016448443 |
| ENSG00000168556 | 0.038596347 | 0.034361729 | 0.033010898 | 0.024679164 |
| ENSG00000203705 | 0.027378507 | 0.033401808 | 0.035883607 | 0.041692033 |
| ENSG00000189306 | 0.04978002  | 0.039569163 | 0.039139343 | 0.041637908 |
| ENSG00000166997 | 0.029792293 | 0.034682283 | 0.027983551 | 0.024622339 |
| ENSG00000155833 | 0.016550098 | 0.025060342 | 0.025116601 | 0.015259478 |
| ENSG00000204300 | 0.015914271 | 0.025082077 | 0.024699658 | 0.01549995  |
| ENSG00000174944 | 0.018506583 | 0.02665846  | 0.026364683 | 0.019316894 |
| ENSG00000188931 | 0.017060553 | 0.025888365 | 0.024985486 | 0.016491984 |
| ENSG00000144589 | 0.030170211 | 0.037863011 | 0.033025537 | 0.025550802 |
| ENSG00000057663 | 0.039708389 | 0.037394223 | 0.032612089 | 0.030483698 |
| ENSG00000171815 | 0.016878073 | 0.025592598 | 0.024247654 | 0.015524102 |
| ENSG00000198753 | 0.016257894 | 0.026711668 | 0.025064441 | 0.017647293 |
| ENSG00000241399 | 0.014495886 | 0.025173153 | 0.024813573 | 0.014783775 |
| ENSG00000083307 | 0.015531195 | 0.024471966 | 0.024716278 | 0.015941524 |
| ENSG00000172123 | 0.075210711 | 0.043344156 | 0.049148765 | 0.039393776 |
| ENSG00000178860 | 0.029735282 | 0.03115204  | 0.031077856 | 0.031348356 |
| ENSG00000186684 | 0.017516859 | 0.029144809 | 0.026918091 | 0.019360156 |
| ENSG00000111405 | 0.025775306 | 0.028961227 | 0.027943072 | 0.022516091 |
| ENSG00000196597 | 0.020589162 | 0.027453262 | 0.024879845 | 0.020431259 |
| ENSG00000241465 | 0.058744969 | 0.024888254 | 0.025964336 | 0.015843267 |
| ENSG00000152767 | 0.045707586 | 0.035425119 | 0.035510336 | 0.029876781 |
| ENSG00000144580 | 0.032979872 | 0.038027454 | 0.032049904 | 0.033315907 |
| ENSG00000162407 | 0.017031066 | 0.024900546 | 0.024890934 | 0.015507842 |
| ENSG00000164385 | 0.015459426 | 0.025896563 | 0.025798866 | 0.014876686 |
| ENSG00000138653 | 0.015584371 | 0.025759255 | 0.025540924 | 0.015976836 |
| ENSG00000184381 | 0.029754936 | 0.033672882 | 0.030525097 | 0.027175729 |
| ENSG00000130958 | 0.052670754 | 0.040320187 | 0.044169551 | 0.046236868 |
| ENSG00000119630 | 0.038633663 | 0.031290746 | 0.028593093 | 0.027755162 |
| ENSG00000196700 | 0.03630682  | 0.037131636 | 0.046552808 | 0.034538592 |
| ENSG00000187775 | 0.017473343 | 0.026501668 | 0.025635591 | 0.017857905 |
| ENSG00000005001 | 0.015204513 | 0.025890774 | 0.025782601 | 0.015608897 |
| ENSG00000089639 | 0.028324416 | 0.031568223 | 0.03911082  | 0.028632406 |
| ENSG00000102837 | 0.014833247 | 0.026865052 | 0.024409141 | 0.014960678 |
| ENSG00000152433 | 0.016822914 | 0.02534887  | 0.026369819 | 0.017143122 |
| ENSG00000036828 | 0.022418349 | 0.027102601 | 0.026989707 | 0.02141747  |
| ENSG00000188243 | 0.029204748 | 0.031195948 | 0.030130839 | 0.031471779 |
| ENSG00000100403 | 0.019242248 | 0.025842526 | 0.025983741 | 0.019838116 |
| ENSG00000150672 | 0.015724147 | 0.024942865 | 0.024250229 | 0.014402491 |
| ENSG00000188677 | 0.034919291 | 0.030874298 | 0.037352944 | 0.095118462 |
| ENSG00000187260 | 0.024746304 | 0.035978021 | 0.035142998 | 0.023097362 |
| ENSG00000135220 | 0.041103424 | 0.024636443 | 0.024445103 | 0.020028766 |
| ENSG00000170581 | 0.033853121 | 0.03756006  | 0.033643167 | 0.031480855 |
| ENSG00000101049 | 0.015801706 | 0.024386392 | 0.025116256 | 0.013925602 |
| ENSG00000111641 | 0.027976631 | 0.031973045 | 0.034990388 | 0.031693604 |



|                 |             |             |             |             |
|-----------------|-------------|-------------|-------------|-------------|
| ENSG00000171435 | 0.015970322 | 0.024956733 | 0.025216512 | 0.01431134  |
| ENSG00000174292 | 0.015893148 | 0.026439172 | 0.026117615 | 0.016973927 |
| ENSG00000163960 | 0.040742209 | 0.040391796 | 0.039258549 | 0.039159191 |
| ENSG00000197724 | 0.019150029 | 0.02717968  | 0.025765435 | 0.016617698 |
| ENSG00000138623 | 0.042557756 | 0.049000451 | 0.043607534 | 0.045199707 |
| ENSG00000183549 | 0.017193474 | 0.026213295 | 0.024618451 | 0.016587876 |
| ENSG00000163607 | 0.027670448 | 0.033525392 | 0.033737363 | 0.034169688 |
| ENSG0000009307  | 0.019687992 | 0.027714808 | 0.027860801 | 0.021577482 |
| ENSG00000162494 | 0.016312372 | 0.025658117 | 0.025056358 | 0.015444683 |
| ENSG00000138294 | 0.015472358 | 0.025645534 | 0.025636813 | 0.014621418 |
| ENSG00000124608 | 0.037928028 | 0.041547089 | 0.037429193 | 0.028253394 |
| ENSG00000205978 | 0.015567149 | 0.024557881 | 0.0248238   | 0.01593537  |
| ENSG00000161798 | 0.015127721 | 0.025813313 | 0.024601567 | 0.01612748  |
| ENSG00000073417 | 0.031825584 | 0.032808395 | 0.032999926 | 0.031247984 |
| ENSG00000167130 | 0.020809786 | 0.027329534 | 0.028825276 | 0.020987538 |
| ENSG00000234438 | 0.019335505 | 0.026167668 | 0.026794671 | 0.018676898 |
| ENSG00000168264 | 0.032296686 | 0.036800746 | 0.039069905 | 0.034346565 |
| ENSG00000130764 | 0.021481885 | 0.028323402 | 0.02939598  | 0.019233971 |
| ENSG00000163746 | 0.014490555 | 0.025580995 | 0.024237905 | 0.01480559  |
| ENSG00000185652 | 0.014585389 | 0.024532506 | 0.023813075 | 0.014870476 |
| ENSG00000243251 | 0.044472835 | 0.0389052   | 0.039821153 | 0.039204404 |
| ENSG00000148143 | 0.0805799   | 0.040870093 | 0.043310081 | 0.031157569 |
| ENSG00000052841 | 0.026314324 | 0.030053793 | 0.034397399 | 0.028598818 |
| ENSG00000186666 | 0.036120068 | 0.037923754 | 0.036055806 | 0.030731159 |
| ENSG00000115556 | 0.017186574 | 0.024859991 | 0.024225181 | 0.014439163 |
| ENSG00000125510 | 0.028348541 | 0.036211419 | 0.030971743 | 0.044061715 |
| ENSG00000186205 | 0.038262681 | 0.038813802 | 0.038761832 | 0.030736236 |
| ENSG00000110811 | 0.0439132   | 0.039052933 | 0.036718925 | 0.032913379 |
| ENSG00000027644 | 0.016781696 | 0.025141359 | 0.026361216 | 0.01608122  |
| ENSG00000156172 | 0.016855879 | 0.026448009 | 0.024941708 | 0.01672732  |
| ENSG00000042445 | 0.02493914  | 0.032372713 | 0.029810473 | 0.020534139 |
| ENSG00000126777 | 0.02810653  | 0.033014451 | 0.029282391 | 0.023218031 |
| ENSG00000155465 | 0.074214814 | 0.093892824 | 0.097614634 | 0.081666112 |
| ENSG00000115598 | 0.015305423 | 0.024563165 | 0.024713232 | 0.01533571  |
| ENSG00000152147 | 0.030786259 | 0.034846319 | 0.030790219 | 0.022763112 |
| ENSG00000149305 | 0.016268929 | 0.025802431 | 0.025418898 | 0.01750611  |
| ENSG00000173915 | 0.115591868 | 0.116630705 | 0.110911216 | 0.058560127 |
| ENSG00000109851 | 0.016136027 | 0.025062121 | 0.02436983  | 0.015359381 |
| ENSG00000204842 | 0.030991095 | 0.043127834 | 0.036537304 | 0.031492298 |
| ENSG00000104957 | 0.027936808 | 0.032468538 | 0.032128929 | 0.026508147 |
| ENSG00000103126 | 0.015988485 | 0.024467968 | 0.024146149 | 0.013552323 |
| ENSG00000143158 | 0.034133112 | 0.033996158 | 0.031655873 | 0.027301687 |
| ENSG00000181924 | 0.026685001 | 0.028625877 | 0.032159895 | 0.02303194  |
| ENSG00000183283 | 0.028705407 | 0.037922235 | 0.035302868 | 0.028807119 |
| ENSG00000157152 | 0.015590363 | 0.025823562 | 0.024662206 | 0.014951857 |
| ENSG00000165097 | 0.015184691 | 0.024850899 | 0.02470248  | 0.015894847 |
| ENSG00000169862 | 0.020893662 | 0.025440152 | 0.025676228 | 0.017362609 |
| ENSG00000100142 | 0.024003144 | 0.027642543 | 0.027693747 | 0.022755605 |
| ENSG00000158863 | 0.024652578 | 0.032985503 | 0.034391524 | 0.026999137 |
| ENSG00000113100 | 0.016435721 | 0.025151211 | 0.026868384 | 0.016838714 |
| ENSG00000144035 | 0.017273414 | 0.02613247  | 0.027302307 | 0.016400092 |
| ENSG00000003393 | 0.031899899 | 0.042694466 | 0.033203565 | 0.032101877 |
| ENSG00000127564 | 0.028277921 | 0.028205877 | 0.031562677 | 0.026362217 |
| ENSG00000171450 | 0.014233916 | 0.025254482 | 0.024616968 | 0.014306097 |

|                 |             |             |             |             |
|-----------------|-------------|-------------|-------------|-------------|
| ENSG00000140990 | 0.024641136 | 0.026418365 | 0.027228087 | 0.020497039 |
| ENSG00000148719 | 0.020530538 | 0.027504044 | 0.02815366  | 0.019096378 |
| ENSG00000172578 | 0.094948429 | 0.081134876 | 0.079587677 | 0.073850332 |
| ENSG00000204267 | 0.029222395 | 0.038479654 | 0.04321666  | 0.021431878 |
| ENSG00000173852 | 0.085941723 | 0.05838393  | 0.05543569  | 0.057946652 |
| ENSG00000149735 | 0.017825473 | 0.026725455 | 0.025716284 | 0.015243528 |
| ENSG00000186895 | 0.02033035  | 0.028285687 | 0.027184367 | 0.025100989 |
| ENSG0000008441  | 0.016932874 | 0.025229515 | 0.024786056 | 0.015436018 |
| ENSG00000186314 | 0.026268428 | 0.029902763 | 0.031753731 | 0.021233343 |
| ENSG00000112679 | 0.031477659 | 0.03482743  | 0.030515377 | 0.027635415 |
| ENSG0000007237  | 0.073746525 | 0.059947923 | 0.06880455  | 0.070759809 |
| ENSG00000165188 | 0.03606185  | 0.098043769 | 0.072958668 | 0.094598737 |
| ENSG00000197993 | 0.02034549  | 0.025737512 | 0.024322799 | 0.017398929 |
| ENSG00000196268 | 0.029723018 | 0.031034624 | 0.029680176 | 0.025368615 |
| ENSG00000171195 | 0.014878355 | 0.025601419 | 0.024536582 | 0.016892498 |
| ENSG00000205111 | 0.016903527 | 0.025419798 | 0.024804969 | 0.015340207 |
| ENSG00000182685 | 0.01915117  | 0.030517369 | 0.026548276 | 0.017272657 |
| ENSG00000198829 | 0.059247965 | 0.046336436 | 0.045000207 | 0.038462354 |
| ENSG00000140854 | 0.033418424 | 0.037611453 | 0.029127972 | 0.029833042 |
| ENSG00000144034 | 0.03167775  | 0.031165709 | 0.033409687 | 0.024531362 |
| ENSG00000136807 | 0.02691915  | 0.034476133 | 0.033343366 | 0.023903321 |
| ENSG00000142765 | 0.058804524 | 0.051402535 | 0.062694602 | 0.046982655 |
| ENSG00000100206 | 0.037869436 | 0.035952563 | 0.036793137 | 0.041798524 |
| ENSG00000179772 | 0.015055292 | 0.024046255 | 0.024684828 | 0.015094749 |
| ENSG00000168418 | 0.017247642 | 0.025176643 | 0.024739058 | 0.016332091 |
| ENSG00000122592 | 0.031430627 | 0.02691429  | 0.033396277 | 0.043554033 |
| ENSG00000117834 | 0.01553597  | 0.024783635 | 0.025163098 | 0.014616378 |
| ENSG00000125999 | 0.01602738  | 0.024460833 | 0.024043272 | 0.015242139 |
| ENSG00000142751 | 0.023456546 | 0.032192269 | 0.033142341 | 0.022666031 |
| ENSG00000143858 | 0.014730738 | 0.024936058 | 0.024951038 | 0.014682889 |
| ENSG00000163319 | 0.026051748 | 0.030823605 | 0.032807085 | 0.024214755 |
| ENSG00000064547 | 0.030648452 | 0.036528382 | 0.034928817 | 0.02787937  |
| ENSG00000125814 | 0.035528364 | 0.037358723 | 0.031767069 | 0.030485491 |
| ENSG00000148841 | 0.026071492 | 0.032458552 | 0.033795194 | 0.027386068 |
| ENSG00000070413 | 0.030429471 | 0.032473922 | 0.03545899  | 0.032507163 |
| ENSG00000138107 | 0.029407385 | 0.036704234 | 0.036119076 | 0.030552403 |
| ENSG00000123080 | 0.074255987 | 0.052122441 | 0.043255429 | 0.054884068 |
| ENSG00000198952 | 0.024789901 | 0.032392245 | 0.037861854 | 0.029416478 |
| ENSG00000153060 | 0.0461677   | 0.064246856 | 0.05243712  | 0.046755324 |
| ENSG00000102934 | 0.044339308 | 0.042432157 | 0.035221111 | 0.035114268 |
| ENSG00000179546 | 0.017887728 | 0.025838383 | 0.025034485 | 0.014734703 |
| ENSG00000173145 | 0.030852559 | 0.035443394 | 0.031781573 | 0.023404035 |
| ENSG00000138111 | 0.023967661 | 0.028750341 | 0.026354404 | 0.019591426 |
| ENSG00000055955 | 0.030534378 | 0.042964716 | 0.031945791 | 0.030459485 |
| ENSG00000086589 | 0.026797372 | 0.032098631 | 0.032283511 | 0.021686925 |
| ENSG00000205464 | 0.022792483 | 0.029428675 | 0.02738734  | 0.022669055 |
| ENSG00000128590 | 0.042262892 | 0.039204968 | 0.047381308 | 0.048991611 |
| ENSG00000149527 | 0.064550165 | 0.06887106  | 0.057857984 | 0.067299351 |
| ENSG00000213809 | 0.032064963 | 0.041949256 | 0.036380983 | 0.054434718 |
| ENSG00000160460 | 0.016349735 | 0.025970381 | 0.024848145 | 0.014946289 |
| ENSG00000170890 | 0.016650159 | 0.026029161 | 0.025643015 | 0.016743923 |
| ENSG00000143622 | 0.056166158 | 0.050110038 | 0.047535507 | 0.055505238 |
| ENSG00000163681 | 0.022418851 | 0.028773481 | 0.025846371 | 0.020437921 |
| ENSG00000173369 | 0.015737376 | 0.024218273 | 0.024260492 | 0.01438225  |

|                 |             |             |             |             |
|-----------------|-------------|-------------|-------------|-------------|
| ENSG0000079385  | 0.067769423 | 0.07171265  | 0.054435207 | 0.065437949 |
| ENSG00000105538 | 0.036909667 | 0.059434979 | 0.092245247 | 0.102055187 |
| ENSG00000213171 | 0.015851406 | 0.024777836 | 0.025046208 | 0.014892306 |
| ENSG00000153558 | 0.017444556 | 0.026261734 | 0.024524276 | 0.015723833 |
| ENSG00000114021 | 0.032918522 | 0.03364578  | 0.033028811 | 0.025875785 |
| ENSG00000006016 | 0.014955547 | 0.025012642 | 0.025327652 | 0.015572187 |
| ENSG00000173210 | 0.015714786 | 0.02517937  | 0.024102845 | 0.015100009 |
| ENSG00000128731 | 0.035468134 | 0.047778863 | 0.035062147 | 0.051489051 |
| ENSG00000197362 | 0.039424474 | 0.036579877 | 0.038284511 | 0.044817006 |
| ENSG00000019186 | 0.016494904 | 0.024320396 | 0.025584931 | 0.014341596 |
| ENSG00000179528 | 0.016071598 | 0.024957042 | 0.024598623 | 0.014956294 |
| ENSG00000116521 | 0.022180812 | 0.026471583 | 0.027277236 | 0.022788914 |
| ENSG00000134363 | 0.017613648 | 0.026391851 | 0.025389925 | 0.01628536  |
| ENSG00000165699 | 0.034628406 | 0.03702523  | 0.031753136 | 0.029906234 |
| ENSG00000189376 | 0.023283393 | 0.030350536 | 0.032783563 | 0.022008008 |
| ENSG00000120253 | 0.034500811 | 0.032333419 | 0.035911627 | 0.032083772 |
| ENSG00000112761 | 0.017777646 | 0.025641558 | 0.025764959 | 0.015412276 |
| ENSG00000140807 | 0.016088738 | 0.024646337 | 0.024197814 | 0.016331964 |
| ENSG00000076641 | 0.058339926 | 0.048231617 | 0.042948206 | 0.059445025 |
| ENSG00000107679 | 0.040748898 | 0.043756602 | 0.044741238 | 0.038476157 |
| ENSG00000165799 | 0.015955917 | 0.026505347 | 0.025705863 | 0.014113506 |
| ENSG00000070159 | 0.024934854 | 0.026103874 | 0.026269752 | 0.018368425 |
| ENSG00000165443 | 0.017829975 | 0.024585427 | 0.024372183 | 0.015605542 |
| ENSG00000187116 | 0.02898878  | 0.026591383 | 0.024822896 | 0.016087551 |
| ENSG00000132581 | 0.022303937 | 0.031373807 | 0.032626674 | 0.021143403 |
| ENSG00000168970 | 0.039058267 | 0.040440538 | 0.038037421 | 0.035220907 |
| ENSG00000154493 | 0.017825989 | 0.026310172 | 0.02561119  | 0.018550154 |
| ENSG00000128609 | 0.028368517 | 0.030093599 | 0.028109463 | 0.034630476 |
| ENSG00000211584 | 0.030328169 | 0.03244724  | 0.037050581 | 0.034000213 |
| ENSG00000108813 | 0.016653913 | 0.02559945  | 0.025162292 | 0.016654084 |
| ENSG00000072080 | 0.016320611 | 0.02585285  | 0.026074671 | 0.016300111 |
| ENSG00000089692 | 0.102433392 | 0.066265525 | 0.078156204 | 0.095791786 |
| ENSG00000119986 | 0.047017781 | 0.040589328 | 0.041256482 | 0.040991635 |
| ENSG00000172381 | 0.017916684 | 0.028574001 | 0.027096336 | 0.017476071 |
| ENSG00000125740 | 0.060859594 | 0.072600896 | 0.068876771 | 0.040621885 |
| ENSG00000176136 | 0.018527337 | 0.026539629 | 0.02714809  | 0.016790367 |
| ENSG00000021488 | 0.016681714 | 0.025016098 | 0.025721378 | 0.016221281 |
| ENSG00000119403 | 0.044881    | 0.04192561  | 0.035420274 | 0.033606851 |
| ENSG00000197594 | 0.016371336 | 0.024793839 | 0.024771908 | 0.01653191  |
| ENSG00000102096 | 0.043601047 | 0.033119337 | 0.039089421 | 0.042356347 |
| ENSG00000132911 | 0.018202198 | 0.029608799 | 0.027632574 | 0.017776591 |
| ENSG00000113712 | 0.023067613 | 0.030168794 | 0.032867679 | 0.025707762 |
| ENSG00000120885 | 0.053722679 | 0.028089386 | 0.030810142 | 0.038449198 |
| ENSG00000118849 | 0.018865879 | 0.027255328 | 0.026140378 | 0.017629053 |
| ENSG00000162613 | 0.028200578 | 0.031628531 | 0.030660809 | 0.023605685 |
| ENSG00000160957 | 0.034965898 | 0.032478001 | 0.034942319 | 0.029668946 |
| ENSG00000161277 | 0.057821366 | 0.054110824 | 0.039844164 | 0.041085833 |
| ENSG00000129810 | 0.0467479   | 0.043541305 | 0.033681327 | 0.030565054 |
| ENSG00000185420 | 0.032996791 | 0.035230433 | 0.029716577 | 0.031588813 |
| ENSG00000064218 | 0.01555116  | 0.02480291  | 0.024147201 | 0.015364457 |
| ENSG00000100603 | 0.022263901 | 0.03065129  | 0.029594493 | 0.017907752 |
| ENSG00000196839 | 0.045669544 | 0.044894322 | 0.039595758 | 0.042206178 |
| ENSG00000140497 | 0.038426988 | 0.039237181 | 0.039737822 | 0.031224455 |
| ENSG00000213054 | 0.087723229 | 0.080663901 | 0.070083963 | 0.070330166 |

|                 |             |             |             |             |
|-----------------|-------------|-------------|-------------|-------------|
| ENSG00000170430 | 0.084547305 | 0.039113502 | 0.034352207 | 0.032659789 |
| ENSG00000167106 | 0.048844864 | 0.056831582 | 0.049417193 | 0.053273031 |
| ENSG00000104755 | 0.015325848 | 0.024949622 | 0.025022545 | 0.015682143 |
| ENSG00000088808 | 0.045247735 | 0.042430359 | 0.041397206 | 0.038102455 |
| ENSG00000179468 | 0.016107329 | 0.02543158  | 0.02455638  | 0.015581019 |
| ENSG00000188107 | 0.015593027 | 0.02467535  | 0.026138778 | 0.015072093 |
| ENSG00000103042 | 0.02590672  | 0.03386246  | 0.033475815 | 0.026933477 |
| ENSG00000068400 | 0.020717878 | 0.028824401 | 0.03012753  | 0.029357121 |
| ENSG00000139266 | 0.036305875 | 0.032574186 | 0.032761763 | 0.034517484 |
| ENSG00000203811 | 0.056193763 | 0.054774331 | 0.071236983 | 0.068707807 |
| ENSG00000112130 | 0.01868253  | 0.027452996 | 0.026933537 | 0.017207681 |
| ENSG00000164463 | 0.03895997  | 0.036520872 | 0.041598113 | 0.038904197 |
| ENSG00000144802 | 0.048038351 | 0.053589098 | 0.051382593 | 0.049355782 |
| ENSG00000137876 | 0.020475396 | 0.027873497 | 0.027465099 | 0.019290732 |
| ENSG00000184945 | 0.016462675 | 0.02487015  | 0.025320933 | 0.015861891 |
| ENSG00000138795 | 0.110610545 | 0.084124199 | 0.069643027 | 0.091145865 |
| ENSG00000183258 | 0.023862013 | 0.029186396 | 0.031215816 | 0.019685972 |
| ENSG00000110060 | 0.023959934 | 0.034182372 | 0.035374834 | 0.021376154 |
| ENSG00000163312 | 0.028843425 | 0.035734482 | 0.036842576 | 0.027562306 |
| ENSG00000125966 | 0.015550492 | 0.0251318   | 0.026964914 | 0.014710985 |
| ENSG00000153292 | 0.014229096 | 0.024504009 | 0.024707203 | 0.013945766 |
| ENSG00000160791 | 0.021195164 | 0.027007889 | 0.02551986  | 0.018383739 |
| ENSG00000167874 | 0.017467356 | 0.02960958  | 0.026702505 | 0.017526564 |
| ENSG00000186442 | 0.017047758 | 0.026077161 | 0.026441042 | 0.017113167 |
| ENSG00000135638 | 0.087893115 | 0.061738886 | 0.04887799  | 0.064653434 |
| ENSG00000243710 | 0.022242889 | 0.024934203 | 0.025520874 | 0.017056609 |
| ENSG00000124003 | 0.017424386 | 0.025024982 | 0.024951108 | 0.016951526 |
| ENSG00000122126 | 0.03407536  | 0.037590002 | 0.033461158 | 0.02982469  |
| ENSG00000064655 | 0.078016175 | 0.059114086 | 0.072490311 | 0.049495966 |
| ENSG00000081181 | 0.02223337  | 0.032734836 | 0.033292752 | 0.024648299 |
| ENSG00000140297 | 0.096303092 | 0.070633328 | 0.089518209 | 0.079000985 |
| ENSG00000135569 | 0.015875591 | 0.025455217 | 0.025499176 | 0.014948761 |
| ENSG00000162511 | 0.028586759 | 0.034085668 | 0.031541438 | 0.027516052 |
| ENSG00000185697 | 0.055222186 | 0.053699891 | 0.045653433 | 0.043570193 |
| ENSG00000106772 | 0.081117284 | 0.04710195  | 0.027461289 | 0.043648587 |
| ENSG00000204315 | 0.028160871 | 0.028407538 | 0.029007126 | 0.020036614 |
| ENSG00000168530 | 0.015159125 | 0.025734833 | 0.024790667 | 0.014745585 |
| ENSG00000172315 | 0.030991103 | 0.033834521 | 0.031292009 | 0.028363514 |
| ENSG00000163320 | 0.034134691 | 0.043105188 | 0.032523642 | 0.02790433  |
| ENSG00000058056 | 0.043038411 | 0.041506427 | 0.03867026  | 0.039669273 |
| ENSG00000184076 | 0.018705336 | 0.025818112 | 0.02569995  | 0.016592879 |
| ENSG00000001561 | 0.052031476 | 0.041937145 | 0.044679482 | 0.045990129 |
| ENSG00000180398 | 0.031979366 | 0.037833549 | 0.032215071 | 0.031410639 |
| ENSG00000162692 | 0.129645471 | 0.107943858 | 0.070446202 | 0.083023962 |
| ENSG00000169612 | 0.026024872 | 0.03484085  | 0.036908953 | 0.02440772  |
| ENSG00000124721 | 0.017052553 | 0.025482049 | 0.026005531 | 0.018322642 |
| ENSG00000071539 | 0.048532927 | 0.044384404 | 0.037973411 | 0.047215015 |
| ENSG00000101474 | 0.026410014 | 0.031813373 | 0.035712683 | 0.026440595 |
| ENSG00000174145 | 0.015858044 | 0.02519685  | 0.024633788 | 0.016219075 |
| ENSG00000086504 | 0.034574466 | 0.037154383 | 0.037797641 | 0.023765708 |
| ENSG00000112379 | 0.016910181 | 0.024631219 | 0.026579031 | 0.014892728 |
| ENSG00000111052 | 0.104183013 | 0.075154431 | 0.076222705 | 0.082692943 |
| ENSG00000118058 | 0.017926177 | 0.028422627 | 0.024585631 | 0.015596416 |
| ENSG00000073605 | 0.041079622 | 0.04495521  | 0.039975218 | 0.054743394 |

|                 |             |             |             |             |
|-----------------|-------------|-------------|-------------|-------------|
| ENSG00000176895 | 0.015996346 | 0.025104917 | 0.025631689 | 0.015846488 |
| ENSG00000067836 | 0.051363399 | 0.041818901 | 0.037878611 | 0.043640154 |
| ENSG00000011523 | 0.026833762 | 0.037388852 | 0.031241679 | 0.030206623 |
| ENSG00000139438 | 0.015280647 | 0.024592404 | 0.024946528 | 0.014822334 |
| ENSG00000076826 | 0.069731653 | 0.055112394 | 0.048564895 | 0.056860872 |
| ENSG00000137133 | 0.025760894 | 0.029792354 | 0.029976088 | 0.025579057 |
| ENSG00000101752 | 0.032791078 | 0.03428706  | 0.035150868 | 0.031208581 |
| ENSG00000197879 | 0.026444783 | 0.03198151  | 0.031652989 | 0.034108011 |
| ENSG00000179766 | 0.013425576 | 0.023890392 | 0.023677688 | 0.013691714 |
| ENSG00000135469 | 0.033810736 | 0.035744358 | 0.032816149 | 0.023991404 |
| ENSG00000196660 | 0.016843949 | 0.024841495 | 0.024541853 | 0.015910675 |
| ENSG00000171428 | 0.029562768 | 0.036095077 | 0.037638162 | 0.031091644 |
| ENSG00000172819 | 0.030838649 | 0.032433906 | 0.028869676 | 0.026436498 |
| ENSG00000042286 | 0.028212161 | 0.033136684 | 0.031914055 | 0.024415351 |
| ENSG00000084731 | 0.016482593 | 0.026543613 | 0.025445435 | 0.017218072 |
| ENSG00000095485 | 0.028325193 | 0.032539845 | 0.032419915 | 0.022130222 |
| ENSG00000140153 | 0.02772168  | 0.038617658 | 0.036364425 | 0.028229628 |
| ENSG00000159339 | 0.061724337 | 0.044139909 | 0.053517965 | 0.055455346 |
| ENSG00000019485 | 0.015635291 | 0.02502727  | 0.024745547 | 0.01468841  |
| ENSG00000100226 | 0.022422952 | 0.030530302 | 0.03026102  | 0.021794894 |
| ENSG00000167550 | 0.052933817 | 0.042609754 | 0.041571505 | 0.041403035 |
| ENSG00000185156 | 0.0311151   | 0.033159343 | 0.029383267 | 0.032304714 |
| ENSG00000100564 | 0.027817576 | 0.033435686 | 0.03603677  | 0.027458997 |
| ENSG00000196366 | 0.015382935 | 0.024329352 | 0.024383332 | 0.015883953 |
| ENSG00000161905 | 0.016106307 | 0.02554501  | 0.025183235 | 0.016436582 |
| ENSG00000137343 | 0.019453444 | 0.027315703 | 0.027008263 | 0.017511293 |
| ENSG00000151012 | 0.022353507 | 0.027300142 | 0.026540402 | 0.023743044 |
| ENSG00000171747 | 0.01531442  | 0.024681642 | 0.024689663 | 0.032744626 |
| ENSG00000118705 | 0.026222343 | 0.030134168 | 0.033770463 | 0.02554413  |
| ENSG00000185015 | 0.036973747 | 0.043418042 | 0.036473557 | 0.034134945 |
| ENSG00000124831 | 0.028413039 | 0.028426457 | 0.032306153 | 0.024218923 |
| ENSG00000221972 | 0.017063162 | 0.026476611 | 0.027185985 | 0.019213487 |
| ENSG00000168887 | 0.030741361 | 0.034026289 | 0.033732261 | 0.027347324 |
| ENSG00000113368 | 0.049180914 | 0.04250449  | 0.036829039 | 0.042532335 |
| ENSG00000126461 | 0.021654676 | 0.03485086  | 0.030318081 | 0.028859522 |
| ENSG00000101337 | 0.018954574 | 0.02584281  | 0.037575119 | 0.024181848 |
| ENSG00000079257 | 0.04668788  | 0.039721642 | 0.036759823 | 0.03273667  |
| ENSG00000142733 | 0.035893176 | 0.032337322 | 0.028107532 | 0.023301913 |
| ENSG00000175535 | 0.015982504 | 0.02539685  | 0.024455307 | 0.014243155 |
| ENSG00000171159 | 0.026213989 | 0.032145072 | 0.032856705 | 0.035150367 |
| ENSG00000134765 | 0.055459339 | 0.054876086 | 0.053575976 | 0.068195889 |
| ENSG00000129673 | 0.015780759 | 0.025203947 | 0.025254577 | 0.014984123 |
| ENSG00000196126 | 0.169617663 | 0.17389295  | 0.198304651 | 0.246757131 |
| ENSG00000111707 | 0.026969622 | 0.036615752 | 0.031859182 | 0.022932775 |
| ENSG00000060558 | 0.071184208 | 0.05056657  | 0.045892161 | 0.06404303  |
| ENSG00000166595 | 0.024986921 | 0.027975474 | 0.029287014 | 0.021959153 |
| ENSG00000107821 | 0.025481266 | 0.031746133 | 0.029932605 | 0.024934404 |
| ENSG00000159685 | 0.072321927 | 0.049697003 | 0.041450857 | 0.064521268 |
| ENSG00000151491 | 0.167271324 | 0.10550878  | 0.101510308 | 0.123482287 |
| ENSG00000171236 | 0.070859487 | 0.050017403 | 0.054174805 | 0.046167634 |
| ENSG00000102032 | 0.044977544 | 0.038002076 | 0.040903327 | 0.037388161 |
| ENSG00000186795 | 0.015535385 | 0.024836196 | 0.025074125 | 0.015720586 |
| ENSG00000154370 | 0.025235308 | 0.030296924 | 0.043017014 | 0.029339134 |
| ENSG00000171126 | 0.015793414 | 0.026042501 | 0.025103276 | 0.014808605 |

|                 |             |             |             |             |
|-----------------|-------------|-------------|-------------|-------------|
| ENSG00000189182 | 0.020609557 | 0.026269922 | 0.026865745 | 0.018392736 |
| ENSG00000053501 | 0.023501095 | 0.029570564 | 0.031278051 | 0.022824928 |
| ENSG00000138246 | 0.032683297 | 0.040222509 | 0.031698003 | 0.026073511 |
| ENSG00000092529 | 0.039163527 | 0.039397516 | 0.04257064  | 0.040161177 |
| ENSG00000101052 | 0.026654297 | 0.030287083 | 0.028558639 | 0.022827564 |
| ENSG00000091164 | 0.022778692 | 0.028153959 | 0.027122571 | 0.02136723  |
| ENSG00000198720 | 0.019119875 | 0.026994475 | 0.026750644 | 0.017168769 |
| ENSG00000197548 | 0.032726677 | 0.044747374 | 0.03397576  | 0.027164868 |
| ENSG00000106952 | 0.022417914 | 0.024744825 | 0.025573001 | 0.017315404 |
| ENSG00000128606 | 0.021986329 | 0.030936285 | 0.026829397 | 0.024279591 |
| ENSG00000196734 | 0.074769623 | 0.035377927 | 0.030697454 | 0.043180987 |
| ENSG00000089335 | 0.023260395 | 0.026901864 | 0.027855762 | 0.019990398 |
| ENSG00000117448 | 0.026208633 | 0.029334756 | 0.029515177 | 0.020347285 |
| ENSG00000091106 | 0.029638426 | 0.032609959 | 0.032382021 | 0.027872862 |
| ENSG00000121486 | 0.038967007 | 0.055516502 | 0.037744895 | 0.036639779 |
| ENSG00000102935 | 0.017132858 | 0.026179955 | 0.026248255 | 0.017457723 |
| ENSG00000145506 | 0.103592416 | 0.091763052 | 0.087799891 | 0.115023141 |
| ENSG00000221914 | 0.02304532  | 0.029995702 | 0.029650788 | 0.019677667 |
| ENSG00000138614 | 0.028245815 | 0.036295566 | 0.034611238 | 0.022790441 |
| ENSG00000164318 | 0.017671697 | 0.025125941 | 0.024668814 | 0.016064289 |
| ENSG00000172296 | 0.015396151 | 0.025183068 | 0.024365152 | 0.017943168 |
| ENSG00000197465 | 0.064480893 | 0.05728648  | 0.042203477 | 0.043312916 |
| ENSG00000136451 | 0.035355993 | 0.042645489 | 0.04367759  | 0.026671761 |
| ENSG00000106483 | 0.015482101 | 0.026932185 | 0.024861648 | 0.015992795 |
| ENSG00000125246 | 0.066240569 | 0.070143415 | 0.055628222 | 0.058703706 |
| ENSG00000133661 | 0.017521478 | 0.024988003 | 0.025442539 | 0.016460764 |
| ENSG00000127511 | 0.029513882 | 0.031094934 | 0.030258228 | 0.02517518  |
| ENSG00000197565 | 0.018396165 | 0.02623658  | 0.024322495 | 0.015976714 |
| ENSG00000112139 | 0.0182074   | 0.028171377 | 0.026183339 | 0.017864417 |
| ENSG00000161939 | 0.027333032 | 0.027006568 | 0.030525071 | 0.031015155 |
| ENSG00000172247 | 0.017531752 | 0.028763843 | 0.025629113 | 0.017507616 |
| ENSG00000214290 | 0.072829851 | 0.069169885 | 0.058986583 | 0.066664343 |
| ENSG00000134058 | 0.024612042 | 0.031125672 | 0.03073442  | 0.023239176 |
| ENSG00000116260 | 0.014877083 | 0.025299515 | 0.025678415 | 0.015098919 |
| ENSG00000183172 | 0.03580485  | 0.043043644 | 0.035416821 | 0.029458796 |
| ENSG00000101236 | 0.034796406 | 0.032899956 | 0.037112542 | 0.03969559  |
| ENSG00000164509 | 0.015342618 | 0.024737245 | 0.024773481 | 0.014648516 |
| ENSG00000072422 | 0.015858239 | 0.025065259 | 0.025223034 | 0.014922189 |
| ENSG00000150893 | 0.015239421 | 0.026588734 | 0.025888645 | 0.015081431 |
| ENSG00000136770 | 0.035089993 | 0.035901362 | 0.035090762 | 0.030950036 |
| ENSG00000173598 | 0.029345288 | 0.037827548 | 0.032466818 | 0.023358178 |
| ENSG00000176988 | 0.014990665 | 0.025403918 | 0.026156654 | 0.016377505 |
| ENSG00000180053 | 0.015582756 | 0.024937268 | 0.024671372 | 0.015819906 |
| ENSG00000151461 | 0.024949505 | 0.032197785 | 0.030325852 | 0.02239038  |
| ENSG00000168495 | 0.036290216 | 0.038967673 | 0.036176297 | 0.036575036 |
| ENSG00000176209 | 0.024558189 | 0.031826258 | 0.029727664 | 0.023978976 |
| ENSG00000123095 | 0.033090539 | 0.042256693 | 0.032216857 | 0.050246694 |
| ENSG00000100285 | 0.113632739 | 0.091544031 | 0.087742055 | 0.095055895 |
| ENSG00000170233 | 0.024083179 | 0.029266424 | 0.030924935 | 0.025649335 |
| ENSG00000116604 | 0.032033683 | 0.040983098 | 0.035582822 | 0.035939243 |
| ENSG00000183035 | 0.017852923 | 0.024408353 | 0.024130935 | 0.015463768 |
| ENSG00000141428 | 0.023403146 | 0.029054472 | 0.033149015 | 0.019964703 |
| ENSG00000171617 | 0.072243712 | 0.063955922 | 0.047566473 | 0.069611453 |
| ENSG00000101846 | 0.082796225 | 0.060719431 | 0.057077313 | 0.068656599 |

|                 |             |             |             |             |
|-----------------|-------------|-------------|-------------|-------------|
| ENSG00000221870 | 0.021811277 | 0.025410732 | 0.02529101  | 0.017531023 |
| ENSG00000152240 | 0.041076745 | 0.042727759 | 0.033124691 | 0.029560446 |
| ENSG00000125652 | 0.024511463 | 0.028036358 | 0.03013165  | 0.023039122 |
| ENSG00000147081 | 0.014907352 | 0.025265439 | 0.024452297 | 0.015007167 |
| ENSG00000173230 | 0.029295927 | 0.039066379 | 0.034674142 | 0.026191674 |
| ENSG00000170473 | 0.029195529 | 0.031452712 | 0.036008304 | 0.027518686 |
| ENSG00000162869 | 0.034819124 | 0.04485121  | 0.034374119 | 0.028509883 |
| ENSG00000136487 | 0.015761603 | 0.025800318 | 0.024652089 | 0.015250733 |
| ENSG00000112759 | 0.030350412 | 0.030764439 | 0.034791054 | 0.030541694 |
| ENSG00000147883 | 0.016729911 | 0.025146849 | 0.025215777 | 0.016190902 |
| ENSG00000115165 | 0.029768886 | 0.033036863 | 0.033751457 | 0.028796796 |
| ENSG00000161573 | 0.015141602 | 0.025758513 | 0.025125516 | 0.014207457 |
| ENSG00000156299 | 0.017304962 | 0.026829106 | 0.02487266  | 0.016547215 |
| ENSG00000120440 | 0.016515413 | 0.025502721 | 0.02616388  | 0.016296132 |
| ENSG00000171962 | 0.01649664  | 0.024987995 | 0.025324455 | 0.015398716 |
| ENSG00000090238 | 0.042823033 | 0.035578761 | 0.040879991 | 0.043074617 |
| ENSG00000183155 | 0.028442474 | 0.031637291 | 0.030260303 | 0.034531026 |
| ENSG00000130377 | 0.016415326 | 0.025028039 | 0.026224135 | 0.016053215 |
| ENSG00000104643 | 0.035533231 | 0.044925191 | 0.044289796 | 0.033573824 |
| ENSG00000136828 | 0.038009152 | 0.032360476 | 0.033048003 | 0.030161167 |
| ENSG00000133606 | 0.018930771 | 0.026569151 | 0.028866492 | 0.018733945 |
| ENSG00000141556 | 0.035238203 | 0.035756586 | 0.034603189 | 0.027556905 |
| ENSG00000162139 | 0.019200837 | 0.028844679 | 0.026958009 | 0.018154689 |
| ENSG00000128833 | 0.045534878 | 0.040756705 | 0.036156832 | 0.036219543 |
| ENSG00000161847 | 0.023616295 | 0.028853647 | 0.035332292 | 0.024639779 |
| ENSG00000169704 | 0.01808632  | 0.025542178 | 0.026088001 | 0.015963241 |
| ENSG00000168393 | 0.039509387 | 0.036664432 | 0.035443583 | 0.031062118 |
| ENSG00000164104 | 0.032973585 | 0.035415863 | 0.030986723 | 0.024661599 |
| ENSG00000205856 | 0.01654692  | 0.02663234  | 0.024784775 | 0.015854715 |
| ENSG00000142408 | 0.017554232 | 0.024923659 | 0.025394979 | 0.017356325 |
| ENSG00000142182 | 0.017508437 | 0.026245035 | 0.02493005  | 0.016868881 |
| ENSG00000136010 | 0.039421656 | 0.035473147 | 0.034721149 | 0.030637631 |
| ENSG00000175374 | 0.054203641 | 0.04446563  | 0.038893933 | 0.03488569  |
| ENSG00000006747 | 0.026398743 | 0.029231205 | 0.027663667 | 0.028725464 |
| ENSG00000102221 | 0.098424374 | 0.08295069  | 0.06123366  | 0.074464204 |
| ENSG00000162961 | 0.023422356 | 0.028941776 | 0.028154867 | 0.019015623 |
| ENSG00000108306 | 0.030597137 | 0.040131356 | 0.033800282 | 0.025587504 |
| ENSG00000167476 | 0.151338797 | 0.109751952 | 0.121918832 | 0.140561025 |
| ENSG00000144746 | 0.028915342 | 0.033006649 | 0.030136441 | 0.022204517 |
| ENSG00000095739 | 0.10357208  | 0.061622042 | 0.057687423 | 0.063903196 |
| ENSG00000095585 | 0.046438526 | 0.040401504 | 0.032908646 | 0.030388632 |
| ENSG00000166603 | 0.01635773  | 0.02616284  | 0.025432574 | 0.015779129 |
| ENSG00000134313 | 0.026480228 | 0.034982741 | 0.033111473 | 0.028907132 |
| ENSG00000064787 | 0.099858394 | 0.085227704 | 0.083913115 | 0.090381698 |
| ENSG00000135902 | 0.016040011 | 0.025253666 | 0.025063032 | 0.015412153 |
| ENSG00000181374 | 0.014960397 | 0.025662056 | 0.024537153 | 0.016414369 |
| ENSG00000042088 | 0.031857946 | 0.035200998 | 0.02863878  | 0.022412072 |
| ENSG00000137269 | 0.106857426 | 0.079001375 | 0.077300416 | 0.093544157 |
| ENSG00000111962 | 0.120788677 | 0.102281459 | 0.079732309 | 0.101994602 |
| ENSG00000064961 | 0.018953131 | 0.027273443 | 0.029350264 | 0.018312512 |
| ENSG00000182372 | 0.032727988 | 0.040916184 | 0.034727581 | 0.028345402 |
| ENSG00000126216 | 0.037992164 | 0.037004631 | 0.034514568 | 0.037149306 |
| ENSG00000113441 | 0.038816033 | 0.045213597 | 0.043210672 | 0.033043817 |
| ENSG00000144792 | 0.01732219  | 0.027179    | 0.026205818 | 0.016852036 |

|                 |             |             |             |             |
|-----------------|-------------|-------------|-------------|-------------|
| ENSG00000183655 | 0.035421668 | 0.033305993 | 0.035289564 | 0.029219742 |
| ENSG00000118298 | 0.016586762 | 0.025682807 | 0.026304969 | 0.016191359 |
| ENSG00000121644 | 0.039996015 | 0.034956395 | 0.034375613 | 0.033390499 |
| ENSG00000161202 | 0.02427691  | 0.032455784 | 0.033045869 | 0.022154888 |
| ENSG00000115204 | 0.023565878 | 0.028163587 | 0.030685204 | 0.025066215 |
| ENSG00000245848 | 0.021773727 | 0.02681222  | 0.02943632  | 0.020265672 |
| ENSG00000176444 | 0.024302087 | 0.039294988 | 0.032492583 | 0.025686    |
| ENSG00000107562 | 0.151776564 | 0.10383979  | 0.088137682 | 0.110854206 |
| ENSG00000138735 | 0.016001561 | 0.024753205 | 0.026567497 | 0.015507453 |
| ENSG00000166821 | 0.056022449 | 0.059981337 | 0.051401026 | 0.052938267 |
| ENSG00000181104 | 0.074863975 | 0.052650439 | 0.058112713 | 0.076233222 |
| ENSG00000166189 | 0.028248871 | 0.033929198 | 0.032867879 | 0.026390202 |
| ENSG00000221888 | 0.016274986 | 0.02484684  | 0.024688433 | 0.014166323 |
| ENSG00000105085 | 0.02707438  | 0.033462366 | 0.038503831 | 0.026985907 |
| ENSG00000100442 | 0.024549784 | 0.030918898 | 0.026963544 | 0.025275097 |
| ENSG00000114742 | 0.031755011 | 0.034239381 | 0.03876192  | 0.02693222  |
| ENSG00000107854 | 0.016918861 | 0.026750341 | 0.027954394 | 0.017376487 |
| ENSG00000159788 | 0.016196777 | 0.025617517 | 0.024939565 | 0.016968151 |
| ENSG00000172845 | 0.02609758  | 0.032533009 | 0.029075462 | 0.025826436 |
| ENSG00000248383 | 0.015941494 | 0.024910387 | 0.024660879 | 0.015180575 |
| ENSG00000086205 | 0.017622816 | 0.026027836 | 0.025249228 | 0.016207647 |
| ENSG00000116649 | 0.031798916 | 0.033597429 | 0.032100447 | 0.031853509 |
| ENSG00000163563 | 0.057021065 | 0.069581664 | 0.056733836 | 0.079217314 |
| ENSG00000073969 | 0.030481836 | 0.039246084 | 0.034791801 | 0.029731201 |
| ENSG00000144218 | 0.015556125 | 0.024739053 | 0.025403135 | 0.016655308 |
| ENSG00000135413 | 0.018300662 | 0.026727662 | 0.025494115 | 0.01679087  |
| ENSG00000105610 | 0.017087233 | 0.025956377 | 0.026733125 | 0.016383028 |
| ENSG00000105370 | 0.016944042 | 0.025455247 | 0.026406072 | 0.01581761  |
| ENSG00000132646 | 0.044415492 | 0.059021603 | 0.038796413 | 0.071663523 |
| ENSG00000164941 | 0.029649048 | 0.036349109 | 0.031222734 | 0.022954662 |
| ENSG00000034239 | 0.016151831 | 0.025382829 | 0.025447185 | 0.015602127 |
| ENSG00000125637 | 0.028154558 | 0.030914246 | 0.032052608 | 0.027135685 |
| ENSG00000224051 | 0.028418894 | 0.033565413 | 0.036538141 | 0.028449422 |
| ENSG00000155511 | 0.016629641 | 0.026276391 | 0.025938291 | 0.016429822 |
| ENSG00000154174 | 0.02685469  | 0.031218914 | 0.029168186 | 0.031944882 |
| ENSG00000082153 | 0.022904525 | 0.029150047 | 0.028175469 | 0.024058545 |
| ENSG00000113140 | 0.061694765 | 0.057807414 | 0.044156107 | 0.052052395 |
| ENSG00000080224 | 0.015200285 | 0.025631867 | 0.02412197  | 0.015015217 |
| ENSG00000135355 | 0.014874648 | 0.024832768 | 0.025637916 | 0.015070444 |
| ENSG00000143569 | 0.029725159 | 0.031735746 | 0.035065676 | 0.028085385 |
| ENSG00000205571 | 0.101644956 | 0.074321694 | 0.074300783 | 0.114584841 |
| ENSG00000214097 | 0.01569735  | 0.026664363 | 0.024281098 | 0.014475235 |
| ENSG00000101198 | 0.015548851 | 0.025940814 | 0.025927212 | 0.014978903 |
| ENSG00000254147 | 0.016024824 | 0.024664909 | 0.025198433 | 0.016135135 |
| ENSG00000104324 | 0.021691579 | 0.02668314  | 0.025930831 | 0.031502052 |
| ENSG00000179913 | 0.01649971  | 0.024825385 | 0.024953527 | 0.016850672 |
| ENSG00000135801 | 0.029032541 | 0.044294449 | 0.043223152 | 0.030824318 |
| ENSG00000110107 | 0.030781603 | 0.03085822  | 0.032511508 | 0.028939488 |
| ENSG00000010318 | 0.016756142 | 0.025504332 | 0.025420554 | 0.016184918 |
| ENSG00000148154 | 0.038435242 | 0.047465324 | 0.046003851 | 0.043815569 |
| ENSG00000173762 | 0.020977544 | 0.025889945 | 0.024654588 | 0.015997429 |
| ENSG00000156603 | 0.025990936 | 0.032936075 | 0.037404825 | 0.026569788 |
| ENSG00000136275 | 0.014929669 | 0.024775878 | 0.024609069 | 0.015511317 |
| ENSG00000175898 | 0.016916069 | 0.025058062 | 0.023676031 | 0.015077903 |



|                 |             |             |             |             |
|-----------------|-------------|-------------|-------------|-------------|
| ENSG00000178401 | 0.015292374 | 0.025119382 | 0.02491096  | 0.014713835 |
| ENSG00000175581 | 0.030961743 | 0.035122128 | 0.033207801 | 0.026187543 |
| ENSG00000155897 | 0.015718059 | 0.024597897 | 0.02525686  | 0.014504511 |
| ENSG00000204859 | 0.02618714  | 0.03000248  | 0.032641877 | 0.021511681 |
| ENSG00000124214 | 0.025766349 | 0.031338571 | 0.029023138 | 0.018546416 |
| ENSG00000141699 | 0.024086333 | 0.032384365 | 0.030256823 | 0.026264915 |
| ENSG00000100462 | 0.028140129 | 0.030436634 | 0.028824702 | 0.025476461 |
| ENSG00000173542 | 0.04550115  | 0.050999968 | 0.052044238 | 0.052351306 |
| ENSG00000156026 | 0.033263897 | 0.035609752 | 0.037869655 | 0.030534696 |
| ENSG00000171431 | 0.015707951 | 0.024168983 | 0.024139014 | 0.015109895 |
| ENSG00000130988 | 0.016455078 | 0.02588605  | 0.025001976 | 0.015301403 |
| ENSG00000185753 | 0.033017438 | 0.032464286 | 0.036550956 | 0.030548972 |
| ENSG00000197860 | 0.016813899 | 0.024891427 | 0.024624016 | 0.015872434 |
| ENSG00000108018 | 0.018543527 | 0.026577368 | 0.025239916 | 0.016446737 |
| ENSG00000099985 | 0.04453552  | 0.040050587 | 0.041188399 | 0.03663713  |
| ENSG00000144152 | 0.020079094 | 0.026565477 | 0.027613157 | 0.015641777 |
| ENSG00000114026 | 0.039872258 | 0.039686881 | 0.032307388 | 0.030152791 |
| ENSG00000178537 | 0.031457032 | 0.033853495 | 0.032286875 | 0.026315287 |
| ENSG00000161653 | 0.016413677 | 0.026057484 | 0.025014683 | 0.016830695 |
| ENSG00000137815 | 0.02419345  | 0.031520082 | 0.032627169 | 0.02255319  |
| ENSG00000079332 | 0.031401259 | 0.036898013 | 0.041893632 | 0.031162964 |
| ENSG00000169953 | 0.023182677 | 0.025966675 | 0.024987315 | 0.020453267 |
| ENSG00000164885 | 0.043070965 | 0.04641362  | 0.038207094 | 0.031661502 |
| ENSG00000108379 | 0.018160027 | 0.027476086 | 0.025691713 | 0.017693636 |
| ENSG00000132256 | 0.029458157 | 0.04119168  | 0.031286002 | 0.031311539 |
| ENSG00000131264 | 0.016265907 | 0.02434468  | 0.02519055  | 0.014089051 |
| ENSG00000180644 | 0.037948279 | 0.056747582 | 0.041985129 | 0.036319422 |
| ENSG00000175143 | 0.015629121 | 0.024945919 | 0.024524116 | 0.014944557 |
| ENSG00000165376 | 0.017664055 | 0.024726252 | 0.024343194 | 0.015599343 |
| ENSG00000108852 | 0.017444231 | 0.027939705 | 0.025285769 | 0.017627957 |
| ENSG00000166582 | 0.039403101 | 0.032211289 | 0.034461648 | 0.026874755 |
| ENSG00000164741 | 0.015185776 | 0.024414224 | 0.024768001 | 0.01540568  |
| ENSG00000186451 | 0.016138412 | 0.025025571 | 0.024623498 | 0.01641007  |
| ENSG00000042832 | 0.016891614 | 0.029314144 | 0.024461727 | 0.015326896 |
| ENSG00000229117 | 0.013015292 | 0.02353833  | 0.023427344 | 0.013192505 |
| ENSG00000145241 | 0.028467851 | 0.035539504 | 0.035539122 | 0.022202323 |
| ENSG00000150093 | 0.017981323 | 0.026658287 | 0.02610188  | 0.015582605 |
| ENSG00000175084 | 0.015617415 | 0.025211284 | 0.024945421 | 0.01550734  |
| ENSG00000171060 | 0.01515416  | 0.025207475 | 0.024478674 | 0.014824423 |
| ENSG00000187191 | 0.01608235  | 0.024915605 | 0.024257061 | 0.015462743 |
| ENSG00000141040 | 0.019835205 | 0.026733418 | 0.024586412 | 0.016522364 |
| ENSG00000114982 | 0.026327265 | 0.031568772 | 0.030017936 | 0.021304904 |
| ENSG00000168610 | 0.035961993 | 0.035699312 | 0.037278202 | 0.035558039 |
| ENSG00000149571 | 0.016018192 | 0.026626777 | 0.02579277  | 0.01548676  |
| ENSG00000172058 | 0.023834001 | 0.029676044 | 0.027334353 | 0.02856865  |
| ENSG00000168439 | 0.031426694 | 0.036454759 | 0.031984729 | 0.03473012  |
| ENSG00000183269 | 0.016905723 | 0.026190169 | 0.026000159 | 0.017549906 |
| ENSG00000133027 | 0.018593832 | 0.025551178 | 0.026109133 | 0.017234734 |
| ENSG00000132109 | 0.027218878 | 0.035484464 | 0.037263756 | 0.035312466 |
| ENSG00000149591 | 0.026473508 | 0.029003284 | 0.028645248 | 0.020774846 |
| ENSG00000214215 | 0.017208452 | 0.02518538  | 0.025702283 | 0.016189546 |
| ENSG00000150455 | 0.027642728 | 0.029626654 | 0.029261376 | 0.023796587 |
| ENSG00000141552 | 0.022792241 | 0.028776455 | 0.026657236 | 0.01865948  |
| ENSG00000167699 | 0.025707521 | 0.030731749 | 0.030298501 | 0.023215043 |

|                 |             |             |             |             |
|-----------------|-------------|-------------|-------------|-------------|
| ENSG00000155130 | 0.043107323 | 0.046941985 | 0.041652626 | 0.051772982 |
| ENSG00000111725 | 0.032358608 | 0.040804368 | 0.042782405 | 0.032000745 |
| ENSG00000149273 | 0.018635403 | 0.025884117 | 0.026252582 | 0.018531512 |
| ENSG00000149743 | 0.034683454 | 0.031048232 | 0.030892464 | 0.034850423 |
| ENSG00000110906 | 0.026930032 | 0.032751813 | 0.03451203  | 0.026496231 |
| ENSG00000179403 | 0.103235292 | 0.076735735 | 0.066120062 | 0.084542964 |
| ENSG00000071205 | 0.042128933 | 0.043335949 | 0.037335263 | 0.040892356 |
| ENSG00000176597 | 0.016594296 | 0.026310227 | 0.025509323 | 0.016015624 |
| ENSG00000167333 | 0.031686819 | 0.03296522  | 0.033964954 | 0.022502055 |
| ENSG00000254221 | 0.020180131 | 0.025143781 | 0.025770876 | 0.018857874 |
| ENSG00000102145 | 0.015923336 | 0.024872249 | 0.025765178 | 0.018015182 |
| ENSG00000213079 | 0.029233328 | 0.03766339  | 0.038259594 | 0.027533743 |
| ENSG00000099331 | 0.024636291 | 0.028520419 | 0.035475149 | 0.0276083   |
| ENSG00000138071 | 0.039465646 | 0.046908259 | 0.043070227 | 0.041533249 |
| ENSG00000128655 | 0.017108446 | 0.025694551 | 0.02483639  | 0.016477188 |
| ENSG00000184588 | 0.054126874 | 0.054233144 | 0.048095711 | 0.046122893 |
| ENSG00000175311 | 0.019717968 | 0.026755076 | 0.027324361 | 0.015322051 |
| ENSG00000132357 | 0.027384186 | 0.032555407 | 0.034593675 | 0.024909328 |
| ENSG00000104415 | 0.015227902 | 0.025375402 | 0.024985734 | 0.015147074 |
| ENSG00000077514 | 0.034575844 | 0.036002503 | 0.032677816 | 0.027896661 |
| ENSG00000122012 | 0.017425775 | 0.024630773 | 0.02465401  | 0.016311151 |
| ENSG00000158941 | 0.025882208 | 0.033893855 | 0.036228757 | 0.029130226 |
| ENSG00000104689 | 0.064008166 | 0.060730167 | 0.044055317 | 0.03891652  |
| ENSG00000100949 | 0.034373438 | 0.035855603 | 0.034914876 | 0.028950332 |
| ENSG00000178053 | 0.076725317 | 0.050437693 | 0.03909881  | 0.038410716 |
| ENSG00000126746 | 0.022258912 | 0.029003894 | 0.034406531 | 0.020026355 |
| ENSG00000133019 | 0.015950777 | 0.024846357 | 0.025320202 | 0.016894079 |
| ENSG00000111711 | 0.034279832 | 0.041476363 | 0.045051953 | 0.029048158 |
| ENSG00000198692 | 0.35483954  | 0.372940687 | 0.351787251 | 0.323761069 |
| ENSG00000181689 | 0.018076826 | 0.025479641 | 0.025888975 | 0.016501824 |
| ENSG00000143153 | 0.098668609 | 0.061466877 | 0.06921208  | 0.08810799  |
| ENSG00000136628 | 0.027166761 | 0.030163166 | 0.028554797 | 0.018579672 |
| ENSG00000071553 | 0.023512966 | 0.03008772  | 0.032323084 | 0.028590766 |
| ENSG00000163286 | 0.016365695 | 0.025560415 | 0.02626835  | 0.015436119 |
| ENSG00000078487 | 0.02858218  | 0.033859682 | 0.029737774 | 0.025256568 |
| ENSG00000118007 | 0.038025784 | 0.043586573 | 0.033709556 | 0.03036637  |
| ENSG00000101251 | 0.015916446 | 0.025763176 | 0.025048002 | 0.016195966 |
| ENSG00000114948 | 0.140527731 | 0.040281708 | 0.029448443 | 0.090173551 |
| ENSG00000105472 | 0.036902588 | 0.035067711 | 0.03705277  | 0.029132522 |
| ENSG00000117122 | 0.017475544 | 0.026336686 | 0.0249376   | 0.015913621 |
| ENSG00000164331 | 0.04645576  | 0.041316305 | 0.041060292 | 0.037334512 |
| ENSG00000176204 | 0.027560236 | 0.024609152 | 0.026209628 | 0.021107975 |
| ENSG00000158023 | 0.03805449  | 0.033492149 | 0.028312418 | 0.026995095 |
| ENSG00000189144 | 0.03725129  | 0.040401005 | 0.031848633 | 0.028306596 |
| ENSG00000151338 | 0.01779534  | 0.024837514 | 0.024646878 | 0.015737884 |
| ENSG00000099769 | 0.018031467 | 0.026203565 | 0.026513431 | 0.017096606 |
| ENSG00000086570 | 0.017191577 | 0.025467111 | 0.025056303 | 0.015146436 |
| ENSG00000183675 | 0.0267782   | 0.030768869 | 0.030548295 | 0.028752162 |
| ENSG00000110002 | 0.06823233  | 0.056019971 | 0.044046087 | 0.048316397 |
| ENSG00000188659 | 0.029228778 | 0.026243283 | 0.028128487 | 0.027818241 |
| ENSG00000183378 | 0.026000853 | 0.028938104 | 0.029742946 | 0.022238115 |
| ENSG00000139618 | 0.038896221 | 0.044452324 | 0.034635974 | 0.039536162 |
| ENSG00000179165 | 0.040001825 | 0.029302791 | 0.030407865 | 0.026902622 |
| ENSG00000092201 | 0.023873699 | 0.032030355 | 0.031331997 | 0.022831412 |

|                |             |             |             |             |
|----------------|-------------|-------------|-------------|-------------|
| ENSG0000054356 | 0.016763982 | 0.025120246 | 0.024713264 | 0.015886049 |
| ENSG0000160870 | 0.018366217 | 0.025725731 | 0.025517161 | 0.019458496 |
| ENSG0000204397 | 0.048496989 | 0.043095944 | 0.041437233 | 0.043063392 |
| ENSG0000130816 | 0.033016323 | 0.03855293  | 0.033592182 | 0.025332309 |
| ENSG0000156395 | 0.028529008 | 0.02674337  | 0.027472724 | 0.019319918 |
| ENSG0000105176 | 0.022060475 | 0.02934369  | 0.029628088 | 0.019408762 |
| ENSG0000163914 | 0.015951509 | 0.025105899 | 0.024762389 | 0.01626551  |
| ENSG0000122756 | 0.017751207 | 0.025140744 | 0.025167948 | 0.016547876 |
| ENSG0000152822 | 0.016384489 | 0.0252385   | 0.025444627 | 0.017068339 |
| ENSG0000196547 | 0.036482333 | 0.035624454 | 0.040020962 | 0.031111284 |
| ENSG0000169903 | 0.016886551 | 0.026618497 | 0.025889718 | 0.015479424 |
| ENSG0000242866 | 0.018450889 | 0.026539467 | 0.027577189 | 0.019318818 |
| ENSG0000132205 | 0.062633257 | 0.050017038 | 0.045960222 | 0.055914863 |
| ENSG0000100266 | 0.035741919 | 0.033263793 | 0.033842734 | 0.033322536 |
| ENSG0000205639 | 0.013458905 | 0.02408737  | 0.024283446 | 0.013136268 |
| ENSG0000132824 | 0.034771332 | 0.035318816 | 0.046719173 | 0.038047928 |
| ENSG0000108599 | 0.025310724 | 0.036514143 | 0.031818518 | 0.026223005 |
| ENSG0000079616 | 0.037895781 | 0.029239824 | 0.033728487 | 0.027044139 |
| ENSG0000143971 | 0.029665597 | 0.03451918  | 0.030833778 | 0.044831881 |
| ENSG0000112893 | 0.076801276 | 0.06033728  | 0.054420109 | 0.056232741 |
| ENSG0000197857 | 0.019921617 | 0.02649804  | 0.025628372 | 0.0169986   |
| ENSG0000160445 | 0.028221822 | 0.038055505 | 0.031509475 | 0.02899515  |
| ENSG0000114656 | 0.01574449  | 0.024709201 | 0.025283551 | 0.015935069 |
| ENSG0000143149 | 0.028469524 | 0.031997574 | 0.028841432 | 0.029751007 |
| ENSG0000089916 | 0.03178502  | 0.032392526 | 0.02999634  | 0.027530898 |
| ENSG0000131943 | 0.024719536 | 0.032485494 | 0.034702215 | 0.028130288 |
| ENSG0000137868 | 0.074522696 | 0.053958246 | 0.040739945 | 0.057708939 |
| ENSG0000053254 | 0.029580738 | 0.032608573 | 0.031811297 | 0.024912344 |
| ENSG0000134253 | 0.0189902   | 0.028820388 | 0.027658407 | 0.018725696 |
| ENSG0000120952 | 0.015484957 | 0.024821598 | 0.02561195  | 0.015550035 |
| ENSG0000035499 | 0.048747555 | 0.046991158 | 0.038046699 | 0.036503384 |
| ENSG0000162337 | 0.054181114 | 0.045032923 | 0.03654873  | 0.046685989 |
| ENSG0000146670 | 0.044502324 | 0.031698772 | 0.036937056 | 0.03322297  |
| ENSG0000133124 | 0.017401918 | 0.026788152 | 0.024323108 | 0.015161195 |
| ENSG0000184881 | 0.01635338  | 0.024978473 | 0.024819511 | 0.0146571   |
| ENSG0000170276 | 0.016076701 | 0.024396785 | 0.023979532 | 0.014517781 |
| ENSG0000196184 | 0.016998883 | 0.02539087  | 0.025298897 | 0.017596671 |
| ENSG0000087128 | 0.01614297  | 0.026827415 | 0.026066636 | 0.015390566 |
| ENSG0000158427 | 0.058692704 | 0.054034745 | 0.047730464 | 0.058088662 |
| ENSG0000068831 | 0.022005905 | 0.036180135 | 0.036138273 | 0.035181882 |
| ENSG0000087074 | 0.039370869 | 0.045034057 | 0.039452993 | 0.035301992 |
| ENSG0000150990 | 0.032528314 | 0.03408829  | 0.033599953 | 0.025688357 |
| ENSG0000170260 | 0.022375853 | 0.031936855 | 0.033638247 | 0.020670278 |
| ENSG0000182631 | 0.015611453 | 0.025278348 | 0.025034379 | 0.013978539 |
| ENSG0000198099 | 0.019298831 | 0.027613748 | 0.027137747 | 0.018784227 |
| ENSG0000172264 | 0.016139921 | 0.024916865 | 0.024868326 | 0.014892693 |
| ENSG0000146166 | 0.018048902 | 0.026353257 | 0.025407571 | 0.015144255 |
| ENSG0000197818 | 0.017676546 | 0.025891757 | 0.026464101 | 0.016575191 |
| ENSG0000171560 | 0.016629549 | 0.025070089 | 0.025568641 | 0.015435031 |
| ENSG0000112977 | 0.028257682 | 0.03581107  | 0.033833446 | 0.029656557 |
| ENSG0000100884 | 0.020525071 | 0.027258458 | 0.024669383 | 0.018372506 |
| ENSG0000146926 | 0.016686909 | 0.026632611 | 0.024065594 | 0.016588918 |
| ENSG0000064115 | 0.039789011 | 0.038978326 | 0.034070949 | 0.032872557 |
| ENSG0000187747 | 0.017454879 | 0.026810799 | 0.026761164 | 0.019705716 |

|                 |             |             |             |             |
|-----------------|-------------|-------------|-------------|-------------|
| ENSG00000104918 | 0.015246367 | 0.025634907 | 0.025091456 | 0.015220795 |
| ENSG00000197124 | 0.028280747 | 0.031523394 | 0.028267751 | 0.025643622 |
| ENSG00000196663 | 0.032835273 | 0.037071265 | 0.032317953 | 0.027960378 |
| ENSG00000115539 | 0.040133426 | 0.038392613 | 0.038592969 | 0.033468815 |
| ENSG00000070182 | 0.017521551 | 0.027126622 | 0.025195107 | 0.016634683 |
| ENSG00000186925 | 0.01637945  | 0.026061201 | 0.02495967  | 0.015914068 |
| ENSG00000166166 | 0.031018223 | 0.046061091 | 0.049061182 | 0.034300973 |
| ENSG00000164199 | 0.043779435 | 0.026576667 | 0.02540766  | 0.024257914 |
| ENSG00000120327 | 0.017020606 | 0.024997628 | 0.025268484 | 0.015739247 |
| ENSG00000179583 | 0.043645606 | 0.046154528 | 0.046416454 | 0.047004639 |
| ENSG00000172175 | 0.039093732 | 0.039360152 | 0.037171112 | 0.034131554 |
| ENSG00000188783 | 0.015165903 | 0.024591068 | 0.02487855  | 0.0144168   |
| ENSG00000144285 | 0.016131688 | 0.025230038 | 0.024329294 | 0.01468778  |
| ENSG00000145975 | 0.016380131 | 0.024389437 | 0.025095106 | 0.015456004 |
| ENSG00000164659 | 0.112575805 | 0.095182739 | 0.080336021 | 0.092098263 |
| ENSG00000126890 | 0.015555075 | 0.02576161  | 0.024638949 | 0.016007151 |
| ENSG00000123570 | 0.032536439 | 0.035264619 | 0.035267167 | 0.030309845 |
| ENSG00000167968 | 0.017161699 | 0.024024009 | 0.025311396 | 0.016002657 |
| ENSG00000000005 | 0.016002577 | 0.024958023 | 0.024507024 | 0.014396774 |
| ENSG00000171557 | 0.014950371 | 0.024968138 | 0.025542437 | 0.014936687 |
| ENSG00000166596 | 0.014848888 | 0.023704226 | 0.024857722 | 0.014340649 |
| ENSG00000166349 | 0.019207568 | 0.026089637 | 0.02534506  | 0.018905977 |
| ENSG00000253293 | 0.015756154 | 0.024464641 | 0.02533653  | 0.015730856 |
| ENSG00000102069 | 0.026860697 | 0.033654487 | 0.029408254 | 0.023159915 |
| ENSG00000197891 | 0.019441819 | 0.027895177 | 0.02978561  | 0.023294405 |
| ENSG00000109519 | 0.030540315 | 0.032708262 | 0.032582368 | 0.025435919 |
| ENSG00000169252 | 0.042383502 | 0.049459018 | 0.032869561 | 0.033246058 |
| ENSG00000105227 | 0.018986048 | 0.026782883 | 0.02648874  | 0.0167316   |
| ENSG00000153879 | 0.0352069   | 0.041746817 | 0.039944574 | 0.033129913 |
| ENSG00000112699 | 0.040549346 | 0.045334387 | 0.036580675 | 0.027635188 |
| ENSG00000129925 | 0.034303166 | 0.033486488 | 0.036556292 | 0.030736193 |
| ENSG00000147183 | 0.016689633 | 0.026555697 | 0.0262606   | 0.016653091 |
| ENSG00000140598 | 0.028212519 | 0.035686107 | 0.030184676 | 0.024547334 |
| ENSG00000112640 | 0.025962131 | 0.032983674 | 0.029016736 | 0.026943018 |
| ENSG00000159596 | 0.023374843 | 0.028127992 | 0.029830038 | 0.021675882 |
| ENSG00000123165 | 0.018201524 | 0.026407263 | 0.027342821 | 0.015138195 |
| ENSG00000154096 | 0.043418969 | 0.03991936  | 0.027665561 | 0.029003466 |
| ENSG00000204644 | 0.026156549 | 0.030341975 | 0.028597093 | 0.021009034 |
| ENSG00000117984 | 0.03130569  | 0.029920875 | 0.032787289 | 0.030762606 |
| ENSG00000188938 | 0.02710134  | 0.032871305 | 0.031236665 | 0.022657491 |
| ENSG00000205220 | 0.023078557 | 0.028890388 | 0.028042748 | 0.017749491 |
| ENSG00000179532 | 0.015488618 | 0.024539892 | 0.025561505 | 0.016973453 |
| ENSG00000181649 | 0.089976762 | 0.06660561  | 0.062680358 | 0.080792092 |
| ENSG00000186976 | 0.017503692 | 0.025255088 | 0.025299447 | 0.016201244 |
| ENSG00000108296 | 0.037470322 | 0.040585737 | 0.038336268 | 0.035496538 |
| ENSG00000143079 | 0.03426683  | 0.041614097 | 0.035555117 | 0.030247418 |
| ENSG00000015413 | 0.016732602 | 0.025298594 | 0.024736684 | 0.014889873 |
| ENSG00000166913 | 0.022441992 | 0.029449841 | 0.028122895 | 0.021754952 |
| ENSG00000128335 | 0.016762936 | 0.024771215 | 0.025452999 | 0.017460968 |
| ENSG00000174446 | 0.032303307 | 0.032958778 | 0.033959625 | 0.031071268 |
| ENSG00000174915 | 0.024993571 | 0.02874702  | 0.034616926 | 0.024495118 |
| ENSG00000164008 | 0.024427275 | 0.026706409 | 0.0321961   | 0.022939311 |
| ENSG00000122367 | 0.016092654 | 0.025028332 | 0.024579456 | 0.015081768 |
| ENSG00000143473 | 0.018200396 | 0.025886426 | 0.025192423 | 0.016809548 |

|                 |             |             |             |             |
|-----------------|-------------|-------------|-------------|-------------|
| ENSG00000129437 | 0.016320849 | 0.025291851 | 0.024773375 | 0.016103161 |
| ENSG00000154059 | 0.019929086 | 0.025885605 | 0.026280788 | 0.019292926 |
| ENSG00000128710 | 0.015036434 | 0.025170166 | 0.024963003 | 0.015148589 |
| ENSG00000136997 | 0.036797941 | 0.030740017 | 0.029090636 | 0.031921556 |
| ENSG00000032219 | 0.027890754 | 0.034037977 | 0.03375318  | 0.026980723 |
| ENSG00000062822 | 0.040819343 | 0.035710803 | 0.032766479 | 0.029407594 |
| ENSG00000167904 | 0.03689054  | 0.04398271  | 0.040937718 | 0.033366988 |
| ENSG00000122483 | 0.042093678 | 0.04296524  | 0.033916289 | 0.030523979 |
| ENSG00000100124 | 0.032248345 | 0.033933769 | 0.030259532 | 0.025464403 |
| ENSG00000214717 | 0.023554427 | 0.035028975 | 0.032277427 | 0.032451296 |
| ENSG00000129484 | 0.038637519 | 0.040505642 | 0.036821216 | 0.026113712 |
| ENSG00000176531 | 0.016158333 | 0.027584599 | 0.026090077 | 0.01741735  |
| ENSG00000102409 | 0.13342339  | 0.083958362 | 0.068404141 | 0.09030517  |
| ENSG00000118160 | 0.016567964 | 0.02520211  | 0.024280642 | 0.015433096 |
| ENSG00000112851 | 0.025862373 | 0.035021141 | 0.033669204 | 0.032145788 |
| ENSG00000145916 | 0.027339325 | 0.032079857 | 0.028730962 | 0.026834855 |
| ENSG00000205420 | 0.015089444 | 0.024409444 | 0.025134173 | 0.015610418 |
| ENSG00000170584 | 0.030141162 | 0.032106433 | 0.029080265 | 0.020714491 |
| ENSG00000105220 | 0.028264993 | 0.030605246 | 0.02845351  | 0.022399111 |
| ENSG00000198951 | 0.029837843 | 0.033333398 | 0.03612506  | 0.027683485 |
| ENSG00000110075 | 0.031207647 | 0.034236305 | 0.035230832 | 0.027270241 |
| ENSG00000104731 | 0.040381519 | 0.037056984 | 0.033806157 | 0.03292173  |
| ENSG00000096063 | 0.032360667 | 0.035894607 | 0.031010519 | 0.02743772  |
| ENSG00000124614 | 0.014790924 | 0.023983842 | 0.024409748 | 0.015579267 |
| ENSG00000160336 | 0.036123952 | 0.039602711 | 0.036442043 | 0.042840221 |
| ENSG00000185448 | 0.015257597 | 0.024503258 | 0.024745169 | 0.015343225 |
| ENSG00000112531 | 0.015633971 | 0.025541857 | 0.02437415  | 0.015328332 |
| ENSG00000151287 | 0.039025246 | 0.036095535 | 0.034156656 | 0.035842082 |
| ENSG00000171951 | 0.017050103 | 0.025042276 | 0.024831425 | 0.016026327 |
| ENSG00000163634 | 0.020463326 | 0.027174993 | 0.026950704 | 0.018025058 |
| ENSG00000012963 | 0.016410636 | 0.026990948 | 0.025529578 | 0.016564097 |
| ENSG00000116254 | 0.015137236 | 0.025195694 | 0.025345929 | 0.01457512  |
| ENSG00000221838 | 0.027212752 | 0.027980701 | 0.030330167 | 0.021986922 |
| ENSG00000162728 | 0.018020311 | 0.026246398 | 0.0252215   | 0.014563883 |
| ENSG00000115756 | 0.016465736 | 0.028659897 | 0.027426741 | 0.01764838  |
| ENSG00000170956 | 0.01635385  | 0.02450651  | 0.024852621 | 0.015653292 |
| ENSG00000128578 | 0.023579889 | 0.026733375 | 0.029581838 | 0.0206405   |
| ENSG00000068308 | 0.027011789 | 0.035592253 | 0.036279741 | 0.026069344 |
| ENSG00000125656 | 0.023301943 | 0.027348463 | 0.026747099 | 0.018031273 |
| ENSG00000083635 | 0.025576947 | 0.030281277 | 0.029043551 | 0.023213973 |
| ENSG00000181588 | 0.024175795 | 0.031900502 | 0.030090191 | 0.019674636 |
| ENSG00000166340 | 0.031466473 | 0.03368854  | 0.034765752 | 0.026844018 |
| ENSG00000213029 | 0.051745608 | 0.043383053 | 0.037941165 | 0.034384924 |
| ENSG00000188729 | 0.016004583 | 0.025358245 | 0.02538152  | 0.014912714 |
| ENSG00000128802 | 0.014704317 | 0.025697103 | 0.024525341 | 0.015003168 |
| ENSG00000171222 | 0.029977729 | 0.032273759 | 0.035544505 | 0.023500945 |
| ENSG00000106004 | 0.03167566  | 0.030414574 | 0.028900344 | 0.034787124 |
| ENSG00000197888 | 0.146435848 | 0.23035304  | 0.216147924 | 0.113393406 |
| ENSG00000136929 | 0.016695495 | 0.025097341 | 0.025252336 | 0.015870434 |
| ENSG00000146373 | 0.037665736 | 0.027759286 | 0.027451644 | 0.020275528 |
| ENSG00000103534 | 0.015571437 | 0.024854702 | 0.025110529 | 0.015314795 |
| ENSG00000227234 | 0.04836841  | 0.031739102 | 0.027433995 | 0.020836476 |
| ENSG00000205126 | 0.018351015 | 0.027836    | 0.02483369  | 0.015135621 |
| ENSG00000083312 | 0.022134375 | 0.026197804 | 0.026698592 | 0.015841498 |

|                 |             |             |             |             |
|-----------------|-------------|-------------|-------------|-------------|
| ENSG00000139187 | 0.027925881 | 0.030908303 | 0.028707467 | 0.01799867  |
| ENSG00000137161 | 0.034070527 | 0.030995945 | 0.040296968 | 0.037404882 |
| ENSG00000121621 | 0.045748362 | 0.037607109 | 0.035680744 | 0.036651882 |
| ENSG00000118900 | 0.029299875 | 0.035486351 | 0.033896633 | 0.025774666 |
| ENSG00000143434 | 0.016948885 | 0.025057189 | 0.025485114 | 0.015089111 |
| ENSG00000106683 | 0.015525838 | 0.025009383 | 0.024587296 | 0.016483106 |
| ENSG00000002834 | 0.025868596 | 0.032135155 | 0.031960017 | 0.021955413 |
| ENSG00000128645 | 0.018345393 | 0.027807366 | 0.026831921 | 0.01886043  |
| ENSG00000005187 | 0.061118629 | 0.044149442 | 0.043925559 | 0.044256673 |
| ENSG00000118894 | 0.026629351 | 0.028247942 | 0.028631986 | 0.024516526 |
| ENSG00000119139 | 0.043534923 | 0.04447811  | 0.039476784 | 0.046088652 |
| ENSG00000158796 | 0.024251367 | 0.031836739 | 0.034122135 | 0.021082521 |
| ENSG00000136169 | 0.03647463  | 0.038985222 | 0.034318491 | 0.024571664 |
| ENSG00000164338 | 0.021423389 | 0.027604289 | 0.024477542 | 0.025100453 |
| ENSG00000123106 | 0.034595523 | 0.042820067 | 0.036661884 | 0.031062307 |
| ENSG00000146842 | 0.028514513 | 0.033143582 | 0.035691811 | 0.0297292   |
| ENSG00000254093 | 0.030249609 | 0.031436504 | 0.033571675 | 0.02775743  |
| ENSG00000114541 | 0.01879732  | 0.025700329 | 0.025182512 | 0.017169782 |
| ENSG00000173838 | 0.016126445 | 0.026416811 | 0.026148805 | 0.016347641 |
| ENSG00000181634 | 0.035177943 | 0.034356762 | 0.036621271 | 0.034512463 |
| ENSG00000134853 | 0.019854284 | 0.026429711 | 0.025881805 | 0.016384458 |
| ENSG00000137070 | 0.016771945 | 0.025267183 | 0.025034764 | 0.016759427 |
| ENSG00000033327 | 0.016726583 | 0.024769024 | 0.024575714 | 0.015504154 |
| ENSG00000092208 | 0.038906542 | 0.040549836 | 0.032102117 | 0.027490183 |
| ENSG00000178764 | 0.050191378 | 0.042011775 | 0.040199007 | 0.038599097 |
| ENSG00000152894 | 0.128891204 | 0.105956062 | 0.088682451 | 0.109269887 |
| ENSG00000000419 | 0.023308714 | 0.029989698 | 0.03144476  | 0.02324104  |
| ENSG00000117472 | 0.071439332 | 0.051544962 | 0.051425376 | 0.051791525 |
| ENSG00000117000 | 0.04429443  | 0.039359326 | 0.038599484 | 0.037838651 |
| ENSG00000183091 | 0.021404018 | 0.029113263 | 0.026542337 | 0.020653262 |
| ENSG00000176563 | 0.015921311 | 0.024555765 | 0.025869545 | 0.014936304 |
| ENSG00000005020 | 0.042512167 | 0.044352733 | 0.040924243 | 0.032096221 |
| ENSG00000023041 | 0.031569393 | 0.036088835 | 0.033858511 | 0.024798596 |
| ENSG00000172728 | 0.020323513 | 0.026983442 | 0.027267751 | 0.019015504 |
| ENSG00000159873 | 0.034703552 | 0.040176478 | 0.032973671 | 0.031451469 |
| ENSG00000170906 | 0.025261417 | 0.029568492 | 0.029102003 | 0.024419937 |
| ENSG00000172362 | 0.016260347 | 0.025047048 | 0.026308847 | 0.015070654 |
| ENSG00000093183 | 0.027657674 | 0.032392263 | 0.031464721 | 0.024921346 |
| ENSG00000187954 | 0.042529483 | 0.041115876 | 0.036185097 | 0.038148382 |
| ENSG00000071991 | 0.01602606  | 0.025786059 | 0.02619105  | 0.015601689 |
| ENSG00000164715 | 0.041484332 | 0.041219786 | 0.051933312 | 0.050151066 |
| ENSG00000159658 | 0.021388293 | 0.030643226 | 0.03049508  | 0.022117094 |
| ENSG00000085276 | 0.015619697 | 0.025687959 | 0.025142128 | 0.014676138 |
| ENSG00000120686 | 0.033922494 | 0.040066096 | 0.0420809   | 0.030919163 |
| ENSG00000118960 | 0.014958809 | 0.026333555 | 0.025166289 | 0.016608357 |
| ENSG00000135040 | 0.027215453 | 0.031041427 | 0.03524382  | 0.022104746 |
| ENSG00000143061 | 0.019182339 | 0.02731227  | 0.026273341 | 0.015457882 |
| ENSG00000198883 | 0.016895083 | 0.025966818 | 0.025785507 | 0.016062505 |
| ENSG00000118689 | 0.015663711 | 0.025564782 | 0.024690579 | 0.014442657 |
| ENSG00000147689 | 0.01543411  | 0.025383177 | 0.024220394 | 0.01502601  |
| ENSG00000137959 | 0.054055375 | 0.041948757 | 0.035656581 | 0.043221761 |
| ENSG00000188994 | 0.037823597 | 0.045282839 | 0.034297959 | 0.055409298 |
| ENSG00000101916 | 0.016334624 | 0.025150236 | 0.024674206 | 0.015227822 |
| ENSG00000118503 | 0.035520205 | 0.033868285 | 0.036950794 | 0.035417286 |

|                 |             |             |             |             |
|-----------------|-------------|-------------|-------------|-------------|
| ENSG00000158169 | 0.048855642 | 0.04756642  | 0.041658517 | 0.043473408 |
| ENSG00000100726 | 0.036378124 | 0.036585859 | 0.036985592 | 0.03215754  |
| ENSG00000185247 | 0.015746717 | 0.025230949 | 0.025091252 | 0.016520119 |
| ENSG00000077150 | 0.037319338 | 0.033320607 | 0.036824468 | 0.038374082 |
| ENSG00000182541 | 0.01701375  | 0.026022089 | 0.025317026 | 0.015292495 |
| ENSG00000146197 | 0.015664175 | 0.025616826 | 0.025649619 | 0.014591366 |
| ENSG00000204669 | 0.018037925 | 0.026849439 | 0.025474374 | 0.015879161 |
| ENSG00000162413 | 0.036811696 | 0.041138973 | 0.041094644 | 0.029991711 |
| ENSG00000108231 | 0.016307239 | 0.024970812 | 0.025131682 | 0.01528891  |
| ENSG00000176485 | 0.085582482 | 0.068212205 | 0.059943193 | 0.072106856 |
| ENSG00000120647 | 0.036446269 | 0.046279066 | 0.033726675 | 0.022819576 |
| ENSG00000137198 | 0.083192737 | 0.06777542  | 0.057872111 | 0.069723561 |
| ENSG00000132953 | 0.029023672 | 0.032212927 | 0.030077027 | 0.023201144 |
| ENSG00000099995 | 0.023670891 | 0.030421613 | 0.029241113 | 0.023116704 |
| ENSG00000134884 | 0.024239233 | 0.031015898 | 0.030061179 | 0.019106011 |
| ENSG00000170291 | 0.033154903 | 0.044523079 | 0.053271264 | 0.032948174 |
| ENSG00000182324 | 0.015366018 | 0.025672914 | 0.024908548 | 0.016918496 |
| ENSG00000160305 | 0.017116673 | 0.02588747  | 0.025727337 | 0.017342486 |
| ENSG00000129562 | 0.033226221 | 0.031660912 | 0.033297452 | 0.027852549 |
| ENSG00000005022 | 0.023034261 | 0.027239118 | 0.028050178 | 0.02125774  |
| ENSG00000174429 | 0.016538253 | 0.025214902 | 0.026105111 | 0.015324452 |
| ENSG00000119650 | 0.033384754 | 0.036185195 | 0.032535573 | 0.028624821 |
| ENSG00000180233 | 0.03266899  | 0.039569659 | 0.04160111  | 0.024868544 |
| ENSG00000165730 | 0.034696108 | 0.02809405  | 0.028649103 | 0.016091981 |
| ENSG00000084710 | 0.016435071 | 0.025294241 | 0.025467642 | 0.014873727 |
| ENSG00000108344 | 0.027572624 | 0.031665621 | 0.034875009 | 0.029563366 |
| ENSG00000203837 | 0.015127564 | 0.026479877 | 0.024842984 | 0.014658955 |
| ENSG00000065675 | 0.016955201 | 0.034114334 | 0.026160269 | 0.017596234 |
| ENSG00000127080 | 0.032259354 | 0.035065621 | 0.033168035 | 0.026536335 |
| ENSG00000074855 | 0.021109429 | 0.026998692 | 0.027767725 | 0.018594026 |
| ENSG00000122692 | 0.031840053 | 0.040862266 | 0.037312644 | 0.038069892 |
| ENSG00000168310 | 0.035225968 | 0.051812411 | 0.05004658  | 0.056368106 |
| ENSG00000213397 | 0.042214681 | 0.039853199 | 0.037151706 | 0.033287311 |
| ENSG00000094631 | 0.026261435 | 0.033042552 | 0.033532631 | 0.029476309 |
| ENSG00000075884 | 0.024121835 | 0.028133915 | 0.028483659 | 0.021806135 |
| ENSG00000159202 | 0.022052491 | 0.027952185 | 0.027745728 | 0.019664158 |
| ENSG00000100417 | 0.02982263  | 0.029511044 | 0.030925508 | 0.022458761 |
| ENSG00000182557 | 0.027974239 | 0.029106173 | 0.02764229  | 0.026809973 |
| ENSG00000140988 | 0.01355623  | 0.02325386  | 0.023818271 | 0.014368619 |
| ENSG00000090402 | 0.017629736 | 0.025113524 | 0.028371988 | 0.015780911 |
| ENSG00000077522 | 0.014788753 | 0.024732853 | 0.023996109 | 0.014679379 |
| ENSG00000188293 | 0.016525153 | 0.025231509 | 0.02435816  | 0.016068521 |
| ENSG00000135253 | 0.015823786 | 0.02456639  | 0.024693612 | 0.015827852 |
| ENSG00000138101 | 0.047250679 | 0.053892508 | 0.047105054 | 0.045209293 |
| ENSG00000166902 | 0.023470185 | 0.02844648  | 0.027960185 | 0.021878907 |
| ENSG00000240563 | 0.137944642 | 0.146492635 | 0.149933565 | 0.106708967 |
| ENSG00000112116 | 0.01655184  | 0.025230822 | 0.025266346 | 0.01545606  |
| ENSG00000141431 | 0.01676029  | 0.024934475 | 0.024275012 | 0.015396315 |
| ENSG00000071859 | 0.032028975 | 0.030230158 | 0.033165068 | 0.023524674 |
| ENSG00000116774 | 0.016570174 | 0.027331647 | 0.025637753 | 0.018684684 |
| ENSG00000214042 | 0.016500724 | 0.024753651 | 0.02537993  | 0.01514807  |
| ENSG00000007933 | 0.017663237 | 0.02528813  | 0.025429412 | 0.016863199 |
| ENSG00000132570 | 0.036885827 | 0.037099686 | 0.032694131 | 0.025692777 |
| ENSG00000170791 | 0.032726812 | 0.038815847 | 0.043556541 | 0.031210304 |

|                 |             |             |             |             |
|-----------------|-------------|-------------|-------------|-------------|
| ENSG0000090863  | 0.033118344 | 0.031692884 | 0.033404018 | 0.029908546 |
| ENSG00000211445 | 0.015416083 | 0.024991809 | 0.025886729 | 0.015842399 |
| ENSG00000104427 | 0.050280079 | 0.04178521  | 0.038307972 | 0.048136603 |
| ENSG00000126752 | 0.022696549 | 0.02643232  | 0.02445089  | 0.014885761 |
| ENSG00000176809 | 0.016457523 | 0.026076219 | 0.023945421 | 0.014506713 |
| ENSG00000171928 | 0.015439028 | 0.025739919 | 0.024634264 | 0.016304866 |
| ENSG00000056661 | 0.082936977 | 0.062020236 | 0.062787063 | 0.0709379   |
| ENSG00000188710 | 0.016127714 | 0.025223021 | 0.024747016 | 0.014042595 |
| ENSG00000152527 | 0.017095694 | 0.026020747 | 0.024614118 | 0.01891928  |
| ENSG00000154269 | 0.016798414 | 0.024951613 | 0.025131156 | 0.016696337 |
| ENSG00000140740 | 0.019581284 | 0.026437248 | 0.026839322 | 0.016147621 |
| ENSG00000100324 | 0.025771951 | 0.028316936 | 0.028262478 | 0.019462292 |
| ENSG00000126351 | 0.015640598 | 0.025909847 | 0.025480273 | 0.015419097 |
| ENSG00000164638 | 0.045404391 | 0.04775371  | 0.041107716 | 0.053802203 |
| ENSG00000149201 | 0.01692778  | 0.026558004 | 0.025105708 | 0.015379476 |
| ENSG00000183844 | 0.025549749 | 0.02877223  | 0.037150961 | 0.027579845 |
| ENSG00000122679 | 0.017764777 | 0.025860577 | 0.024826442 | 0.016113115 |
| ENSG00000164265 | 0.014206857 | 0.024367929 | 0.024853825 | 0.013695742 |
| ENSG00000092203 | 0.022704251 | 0.032125024 | 0.031875707 | 0.026449948 |
| ENSG00000197935 | 0.018913394 | 0.027512298 | 0.025435403 | 0.02153073  |
| ENSG00000180532 | 0.033114241 | 0.024508477 | 0.027252741 | 0.016770201 |
| ENSG00000162639 | 0.061639313 | 0.054064922 | 0.056752748 | 0.063003499 |
| ENSG00000151692 | 0.062199798 | 0.065255092 | 0.062817885 | 0.062728387 |
| ENSG00000143575 | 0.023059166 | 0.027017397 | 0.02949369  | 0.022196467 |
| ENSG00000167987 | 0.032101258 | 0.035896541 | 0.031792425 | 0.028792053 |
| ENSG00000196967 | 0.032789667 | 0.036659051 | 0.031845869 | 0.02871866  |
| ENSG00000102076 | 0.016311238 | 0.024152257 | 0.024197645 | 0.015539354 |
| ENSG00000142173 | 0.017678129 | 0.024559931 | 0.024855213 | 0.016117035 |
| ENSG00000099910 | 0.040852078 | 0.042677898 | 0.042094944 | 0.036353185 |
| ENSG00000163939 | 0.015478522 | 0.024651973 | 0.025542759 | 0.015281887 |
| ENSG00000196337 | 0.01620731  | 0.025081805 | 0.025051847 | 0.015937117 |
| ENSG00000102890 | 0.021566949 | 0.028299227 | 0.029078966 | 0.019591039 |
| ENSG00000196188 | 0.014949379 | 0.025636162 | 0.025062222 | 0.015561242 |
| ENSG00000125780 | 0.016810018 | 0.026192054 | 0.025000808 | 0.014153156 |
| ENSG00000204580 | 0.017549231 | 0.025900921 | 0.026363402 | 0.018479973 |
| ENSG00000134389 | 0.01670202  | 0.025314555 | 0.025693306 | 0.016635046 |
| ENSG00000178685 | 0.0337113   | 0.03917419  | 0.031457039 | 0.025805383 |
| ENSG00000178075 | 0.049487049 | 0.032436178 | 0.036628578 | 0.049279001 |
| ENSG00000170915 | 0.079862624 | 0.075325613 | 0.068837146 | 0.047409862 |
| ENSG00000050130 | 0.030343046 | 0.037371748 | 0.035796294 | 0.024271458 |
| ENSG00000198466 | 0.041476131 | 0.046999855 | 0.042514777 | 0.035408649 |
| ENSG00000138834 | 0.023349434 | 0.041115017 | 0.027225791 | 0.033498064 |
| ENSG00000117751 | 0.038284471 | 0.034686463 | 0.033405003 | 0.031071899 |
| ENSG00000131584 | 0.028087567 | 0.047722356 | 0.033927311 | 0.034628492 |
| ENSG00000151552 | 0.059936695 | 0.039768322 | 0.039388889 | 0.054815862 |
| ENSG00000140092 | 0.026689393 | 0.027560796 | 0.025445008 | 0.019485086 |
| ENSG00000122386 | 0.033915439 | 0.034989585 | 0.035656629 | 0.028680455 |
| ENSG00000146707 | 0.096217838 | 0.084467701 | 0.041211381 | 0.06705406  |
| ENSG00000070770 | 0.025748217 | 0.032801594 | 0.030930322 | 0.027930161 |
| ENSG00000130711 | 0.021620745 | 0.029416247 | 0.026427048 | 0.019317392 |
| ENSG00000126432 | 0.021854474 | 0.026652489 | 0.025815127 | 0.019975282 |
| ENSG00000128536 | 0.01749768  | 0.02552238  | 0.024689035 | 0.015425644 |
| ENSG00000107742 | 0.050836506 | 0.049931903 | 0.029935539 | 0.035100782 |
| ENSG00000152082 | 0.043934314 | 0.041607517 | 0.038020772 | 0.030170083 |



|                 |             |             |             |             |
|-----------------|-------------|-------------|-------------|-------------|
| ENSG00000121690 | 0.075444691 | 0.059799825 | 0.059648125 | 0.061628371 |
| ENSG00000145388 | 0.032232998 | 0.03713948  | 0.03453713  | 0.025395644 |
| ENSG00000105722 | 0.0239528   | 0.030038349 | 0.031442285 | 0.026380316 |
| ENSG00000143393 | 0.032821853 | 0.034754224 | 0.044528303 | 0.035198576 |
| ENSG00000066777 | 0.025672496 | 0.034824886 | 0.030528859 | 0.022322207 |
| ENSG00000091181 | 0.017739466 | 0.026203721 | 0.026323656 | 0.015438533 |
| ENSG00000125351 | 0.029488151 | 0.035230741 | 0.033086442 | 0.029261982 |
| ENSG00000157014 | 0.031902696 | 0.034174726 | 0.035113282 | 0.028905679 |
| ENSG00000168397 | 0.038007207 | 0.039530174 | 0.038404886 | 0.036534104 |
| ENSG00000167644 | 0.015964037 | 0.024826801 | 0.024506935 | 0.014466187 |
| ENSG00000158747 | 0.015816208 | 0.026130806 | 0.025396393 | 0.015224272 |
| ENSG00000167757 | 0.016902219 | 0.025280776 | 0.024691644 | 0.015533303 |
| ENSG00000159261 | 0.029705582 | 0.031875641 | 0.029924201 | 0.02507893  |
| ENSG00000183395 | 0.037783812 | 0.034140423 | 0.034366468 | 0.03330244  |
| ENSG00000121210 | 0.025259995 | 0.033669311 | 0.030526544 | 0.026760383 |
| ENSG00000101327 | 0.016741797 | 0.026621769 | 0.024796138 | 0.017414716 |
| ENSG00000133789 | 0.031819828 | 0.056508254 | 0.033842978 | 0.0313275   |
| ENSG00000115386 | 0.014965783 | 0.024024468 | 0.024662362 | 0.014793087 |
| ENSG00000126581 | 0.022417575 | 0.029149472 | 0.031185685 | 0.02383131  |
| ENSG00000135829 | 0.04666047  | 0.078509121 | 0.045986566 | 0.075533057 |
| ENSG00000176014 | 0.094338192 | 0.055899157 | 0.052800945 | 0.066535912 |
| ENSG00000205744 | 0.025804669 | 0.029618737 | 0.029328605 | 0.021968327 |
| ENSG00000144290 | 0.017044244 | 0.025744698 | 0.024746574 | 0.015163601 |
| ENSG00000080371 | 0.028891122 | 0.031337315 | 0.030029306 | 0.026653426 |
| ENSG00000103121 | 0.027699436 | 0.031345664 | 0.029498371 | 0.020127711 |
| ENSG00000179059 | 0.017638376 | 0.026692866 | 0.026340682 | 0.017085156 |
| ENSG00000169085 | 0.017415958 | 0.026730943 | 0.025865537 | 0.016592579 |
| ENSG00000141837 | 0.017603227 | 0.031810498 | 0.029203333 | 0.021844589 |
| ENSG00000114331 | 0.038515799 | 0.038233739 | 0.042930511 | 0.026701399 |
| ENSG00000118985 | 0.043777692 | 0.045161527 | 0.052004596 | 0.048712508 |
| ENSG00000168993 | 0.020457513 | 0.028119708 | 0.027025976 | 0.021159645 |
| ENSG00000124523 | 0.03301097  | 0.04097002  | 0.03412129  | 0.029550565 |
| ENSG00000180921 | 0.04354317  | 0.033310518 | 0.035702643 | 0.033004601 |
| ENSG0000009335  | 0.029776504 | 0.036059941 | 0.032297058 | 0.026677711 |
| ENSG00000188629 | 0.028241809 | 0.03129868  | 0.029241543 | 0.024847759 |
| ENSG00000173467 | 0.017524781 | 0.024012772 | 0.025460149 | 0.016955451 |
| ENSG00000106100 | 0.02639785  | 0.031679847 | 0.034259864 | 0.030847768 |
| ENSG00000177463 | 0.02621221  | 0.032998293 | 0.029834258 | 0.022150432 |
| ENSG00000161681 | 0.016386787 | 0.025389388 | 0.025059307 | 0.015131843 |
| ENSG00000206560 | 0.028712935 | 0.034651125 | 0.031221505 | 0.024457988 |
| ENSG00000155868 | 0.029226648 | 0.033503613 | 0.031839714 | 0.020009075 |
| ENSG00000145882 | 0.035070038 | 0.039052773 | 0.033493681 | 0.028331383 |
| ENSG00000124574 | 0.040283881 | 0.040410755 | 0.032849598 | 0.034812648 |
| ENSG00000104147 | 0.045567361 | 0.041369066 | 0.034099332 | 0.03546517  |
| ENSG00000115523 | 0.016368531 | 0.025398371 | 0.024885322 | 0.015213976 |
| ENSG00000163114 | 0.016888237 | 0.025832234 | 0.024651684 | 0.016426861 |
| ENSG00000039537 | 0.017080171 | 0.025005397 | 0.024448705 | 0.014706645 |
| ENSG00000198160 | 0.030687044 | 0.037610816 | 0.034103825 | 0.02720719  |
| ENSG00000103319 | 0.0412959   | 0.037530641 | 0.032512761 | 0.030739249 |
| ENSG00000099204 | 0.034039826 | 0.031532048 | 0.031483812 | 0.034322766 |
| ENSG00000002587 | 0.086754148 | 0.09137417  | 0.077706133 | 0.090875061 |
| ENSG00000165185 | 0.015493484 | 0.025451118 | 0.025409987 | 0.015835073 |
| ENSG00000196581 | 0.015481358 | 0.025326267 | 0.024315199 | 0.015248707 |
| ENSG00000132671 | 0.017501809 | 0.026965055 | 0.02555939  | 0.014747729 |

|                 |             |             |             |             |
|-----------------|-------------|-------------|-------------|-------------|
| ENSG00000171703 | 0.030706516 | 0.027893303 | 0.028334096 | 0.029303278 |
| ENSG00000007255 | 0.027184922 | 0.029564824 | 0.03431393  | 0.028613791 |
| ENSG00000136986 | 0.031298852 | 0.036334377 | 0.036911245 | 0.026960181 |
| ENSG00000166401 | 0.047951972 | 0.064133473 | 0.059474232 | 0.058610176 |
| ENSG00000091732 | 0.020488718 | 0.028728969 | 0.028099665 | 0.02087262  |
| ENSG00000120937 | 0.016356994 | 0.025341498 | 0.025025705 | 0.015600344 |
| ENSG00000164746 | 0.015408759 | 0.024231686 | 0.025402271 | 0.015517267 |
| ENSG00000111537 | 0.070263234 | 0.061617718 | 0.085003303 | 0.083526528 |
| ENSG00000164530 | 0.019690342 | 0.025146538 | 0.02553628  | 0.019103122 |
| ENSG00000205669 | 0.016047756 | 0.024010867 | 0.025480608 | 0.015764098 |
| ENSG00000183864 | 0.020299816 | 0.025539886 | 0.0255031   | 0.017594321 |
| ENSG00000166483 | 0.037975749 | 0.041857252 | 0.038618603 | 0.035525888 |
| ENSG00000066697 | 0.03775867  | 0.038987988 | 0.03341247  | 0.030958816 |
| ENSG00000165046 | 0.016180799 | 0.025811202 | 0.025164906 | 0.019508928 |
| ENSG00000188158 | 0.018034285 | 0.028159347 | 0.026124026 | 0.017643389 |
| ENSG00000163206 | 0.020304091 | 0.026702878 | 0.030515521 | 0.0170548   |
| ENSG00000002745 | 0.014463963 | 0.025249323 | 0.024966274 | 0.014160133 |
| ENSG00000134955 | 0.049237846 | 0.05271475  | 0.049782566 | 0.056900179 |
| ENSG00000163918 | 0.033623714 | 0.034313306 | 0.028731034 | 0.028738511 |
| ENSG00000167196 | 0.04017253  | 0.036646297 | 0.031013971 | 0.029410167 |
| ENSG00000170312 | 0.038953955 | 0.036950033 | 0.031752367 | 0.030209097 |
| ENSG00000154978 | 0.021095356 | 0.029567639 | 0.02882174  | 0.021897137 |
| ENSG00000182168 | 0.016147492 | 0.024485472 | 0.024970286 | 0.0141762   |
| ENSG00000157884 | 0.015840601 | 0.024580855 | 0.024803501 | 0.016132707 |
| ENSG00000156453 | 0.015744031 | 0.025194078 | 0.024620963 | 0.015839883 |
| ENSG00000105258 | 0.023510094 | 0.028025729 | 0.027524843 | 0.018693056 |
| ENSG00000116580 | 0.025205107 | 0.035503282 | 0.040172921 | 0.027264772 |
| ENSG00000090889 | 0.044861235 | 0.038793166 | 0.034913575 | 0.032155371 |
| ENSG00000163950 | 0.033764765 | 0.032282826 | 0.033168454 | 0.030432773 |
| ENSG00000197702 | 0.018746947 | 0.027321068 | 0.02704217  | 0.020390088 |
| ENSG00000170558 | 0.133397115 | 0.082586775 | 0.042432267 | 0.064972204 |
| ENSG00000117724 | 0.053104618 | 0.045252429 | 0.03795297  | 0.041500705 |
| ENSG00000130540 | 0.015857413 | 0.024935775 | 0.023946826 | 0.014221132 |
| ENSG00000095574 | 0.027630243 | 0.03813544  | 0.029760156 | 0.042741747 |
| ENSG00000197711 | 0.01550623  | 0.024480521 | 0.024695489 | 0.014845522 |
| ENSG00000166529 | 0.031951494 | 0.044204553 | 0.042974303 | 0.026104845 |
| ENSG00000138942 | 0.02389873  | 0.03138314  | 0.035239157 | 0.020515618 |
| ENSG00000159140 | 0.03102963  | 0.038023892 | 0.038437662 | 0.029095695 |
| ENSG00000150756 | 0.034819412 | 0.035275512 | 0.031394845 | 0.029087978 |
| ENSG00000206530 | 0.017548507 | 0.025686954 | 0.025542486 | 0.016907452 |
| ENSG00000025770 | 0.022829989 | 0.030852786 | 0.027495432 | 0.020687447 |
| ENSG00000112425 | 0.034458697 | 0.031432984 | 0.030454358 | 0.028748173 |
| ENSG00000182223 | 0.017801313 | 0.025926165 | 0.024538325 | 0.015786202 |
| ENSG00000160789 | 0.055156001 | 0.047020346 | 0.047024054 | 0.042026367 |
| ENSG00000222014 | 0.027059272 | 0.030013939 | 0.032959415 | 0.026582388 |
| ENSG00000058804 | 0.044611764 | 0.041648725 | 0.036166514 | 0.029289214 |
| ENSG00000168014 | 0.016669835 | 0.027789811 | 0.025864188 | 0.016489269 |
| ENSG00000104980 | 0.025765771 | 0.028848746 | 0.033904067 | 0.022786855 |
| ENSG00000150086 | 0.01727783  | 0.024672081 | 0.026084694 | 0.016224266 |
| ENSG00000131748 | 0.020724586 | 0.02809556  | 0.034768534 | 0.024668495 |
| ENSG00000003989 | 0.015586105 | 0.025105191 | 0.025013974 | 0.015364779 |
| ENSG00000159905 | 0.029060602 | 0.035188445 | 0.028599567 | 0.024465067 |
| ENSG00000108591 | 0.024118329 | 0.028320424 | 0.03356492  | 0.024997389 |
| ENSG00000143341 | 0.016442964 | 0.025695637 | 0.024978714 | 0.015998658 |

|                 |             |             |             |             |
|-----------------|-------------|-------------|-------------|-------------|
| ENSG00000131042 | 0.048843064 | 0.030954985 | 0.025379357 | 0.016975378 |
| ENSG00000163251 | 0.028110345 | 0.033535306 | 0.031183538 | 0.025531778 |
| ENSG00000203667 | 0.035173632 | 0.036290316 | 0.030100376 | 0.030411708 |
| ENSG00000203805 | 0.018310089 | 0.027745048 | 0.026557913 | 0.017141708 |
| ENSG00000145907 | 0.021774842 | 0.027858594 | 0.026908135 | 0.019042395 |
| ENSG00000135407 | 0.029849283 | 0.02683479  | 0.027696705 | 0.019193214 |
| ENSG00000139132 | 0.017855969 | 0.025525078 | 0.025388719 | 0.016218688 |
| ENSG00000244474 | 0.018446831 | 0.024942987 | 0.024684463 | 0.016940563 |
| ENSG00000100294 | 0.031813798 | 0.033690852 | 0.033721894 | 0.02916515  |
| ENSG00000106565 | 0.022432245 | 0.024120063 | 0.02746517  | 0.014737903 |
| ENSG00000204950 | 0.013535252 | 0.02369377  | 0.023418145 | 0.013160018 |
| ENSG00000171302 | 0.021673252 | 0.031921883 | 0.038706942 | 0.023132064 |
| ENSG00000148090 | 0.041626781 | 0.04737797  | 0.036883723 | 0.040628791 |
| ENSG00000163040 | 0.106177445 | 0.077448878 | 0.078356042 | 0.084960325 |
| ENSG00000105698 | 0.02443556  | 0.0325103   | 0.034933563 | 0.026154786 |
| ENSG00000171711 | 0.09918622  | 0.050600527 | 0.052521663 | 0.054679744 |
| ENSG00000153303 | 0.016029632 | 0.024284757 | 0.025676686 | 0.014701237 |
| ENSG00000164850 | 0.097856833 | 0.072897123 | 0.059648812 | 0.07401732  |
| ENSG00000130338 | 0.037286401 | 0.035769376 | 0.034649151 | 0.036485329 |
| ENSG00000054179 | 0.083370799 | 0.045114766 | 0.036611757 | 0.06122421  |
| ENSG00000173641 | 0.015479217 | 0.024992926 | 0.02425692  | 0.015029777 |
| ENSG00000101412 | 0.038082534 | 0.032492216 | 0.042720086 | 0.031945187 |
| ENSG00000100739 | 0.018137784 | 0.024979716 | 0.026332699 | 0.015161266 |
| ENSG00000172534 | 0.031965078 | 0.0327226   | 0.038038862 | 0.029269487 |
| ENSG00000134020 | 0.019021854 | 0.026639334 | 0.026726474 | 0.021948562 |
| ENSG00000160917 | 0.026220702 | 0.029407273 | 0.030512369 | 0.024268057 |
| ENSG00000132688 | 0.016987655 | 0.024816564 | 0.025272565 | 0.016805432 |
| ENSG00000186832 | 0.016482486 | 0.02567582  | 0.025959658 | 0.016869866 |
| ENSG00000146282 | 0.027377803 | 0.030309932 | 0.032811313 | 0.01841812  |
| ENSG00000104081 | 0.020527942 | 0.030874918 | 0.027022299 | 0.020059322 |
| ENSG00000189433 | 0.014943347 | 0.024809986 | 0.024965098 | 0.0138683   |
| ENSG00000047621 | 0.03212917  | 0.042685024 | 0.034231924 | 0.029840784 |
| ENSG00000115414 | 0.016428402 | 0.025275607 | 0.024847338 | 0.015865736 |
| ENSG00000112297 | 0.049473334 | 0.040584647 | 0.04316362  | 0.043321931 |
| ENSG00000128298 | 0.023604908 | 0.028851077 | 0.029182064 | 0.024861713 |
| ENSG00000067057 | 0.035505568 | 0.030609492 | 0.027523772 | 0.025452157 |
| ENSG00000105726 | 0.038071343 | 0.039911313 | 0.034970791 | 0.029140989 |
| ENSG00000166925 | 0.022438395 | 0.030115155 | 0.028557979 | 0.023801693 |
| ENSG00000204389 | 0.060202499 | 0.044211113 | 0.04729918  | 0.047138926 |
| ENSG00000136480 | 0.041468415 | 0.044732583 | 0.032709865 | 0.030680805 |
| ENSG00000175857 | 0.054995601 | 0.065299271 | 0.050843864 | 0.07826177  |
| ENSG00000107831 | 0.016177901 | 0.027518783 | 0.026480212 | 0.017049708 |
| ENSG00000171843 | 0.038144041 | 0.035263139 | 0.035198729 | 0.028231763 |
| ENSG00000184348 | 0.027503513 | 0.027989495 | 0.038669451 | 0.029135483 |
| ENSG00000035141 | 0.034316356 | 0.035784148 | 0.036088863 | 0.031836758 |
| ENSG00000162745 | 0.014989147 | 0.024642753 | 0.024253248 | 0.0157531   |
| ENSG00000177700 | 0.026664772 | 0.029785359 | 0.028714823 | 0.029543971 |
| ENSG00000213064 | 0.019776716 | 0.025666579 | 0.028256662 | 0.017510568 |
| ENSG00000169181 | 0.01588068  | 0.026193948 | 0.025697659 | 0.015786084 |
| ENSG00000134262 | 0.030712312 | 0.036409835 | 0.03128216  | 0.026458292 |
| ENSG00000135392 | 0.027424953 | 0.033563834 | 0.03381903  | 0.024061078 |
| ENSG00000204245 | 0.018801222 | 0.024801684 | 0.024571198 | 0.017796067 |
| ENSG00000188283 | 0.033529263 | 0.03952812  | 0.035613047 | 0.025705932 |
| ENSG00000092199 | 0.020046379 | 0.027801607 | 0.027969894 | 0.016509328 |

|                 |             |             |             |             |
|-----------------|-------------|-------------|-------------|-------------|
| ENSG00000171931 | 0.016273181 | 0.025389282 | 0.024985519 | 0.015847539 |
| ENSG00000131634 | 0.015038701 | 0.02591063  | 0.026299386 | 0.018761171 |
| ENSG00000003137 | 0.01566006  | 0.025282994 | 0.02568616  | 0.016392196 |
| ENSG00000118873 | 0.028386569 | 0.035152506 | 0.031825303 | 0.024306201 |
| ENSG00000071462 | 0.02457367  | 0.029343628 | 0.029899617 | 0.0220487   |
| ENSG00000151726 | 0.039126235 | 0.042666772 | 0.036224106 | 0.033172354 |
| ENSG00000187824 | 0.040620279 | 0.038460483 | 0.038290387 | 0.042796818 |
| ENSG00000173908 | 0.015951355 | 0.024610654 | 0.024652004 | 0.015560448 |
| ENSG00000084090 | 0.024947403 | 0.026250656 | 0.027334169 | 0.022679177 |
| ENSG00000176623 | 0.030225267 | 0.030768962 | 0.029931445 | 0.019732395 |
| ENSG00000196576 | 0.034544487 | 0.039756691 | 0.040952864 | 0.031578287 |
| ENSG00000146950 | 0.022749759 | 0.02807799  | 0.024819305 | 0.018257193 |
| ENSG00000131089 | 0.047508133 | 0.046282389 | 0.044866957 | 0.03692219  |
| ENSG00000075292 | 0.03224106  | 0.040131297 | 0.035019401 | 0.027166115 |
| ENSG00000113790 | 0.047144883 | 0.0402437   | 0.036621816 | 0.035711628 |
| ENSG00000242110 | 0.039043194 | 0.03540035  | 0.033049774 | 0.033086762 |
| ENSG00000169548 | 0.014602881 | 0.024590126 | 0.025726569 | 0.014994176 |
| ENSG00000162772 | 0.018449185 | 0.027882845 | 0.026594075 | 0.018396162 |
| ENSG00000010295 | 0.016293626 | 0.025374179 | 0.025612083 | 0.015937719 |
| ENSG00000143590 | 0.017078435 | 0.024816311 | 0.02489661  | 0.015473409 |
| ENSG00000197136 | 0.027313973 | 0.033463355 | 0.037432773 | 0.033624441 |
| ENSG00000186468 | 0.013729473 | 0.023643715 | 0.024163639 | 0.014867874 |
| ENSG00000123689 | 0.168349923 | 0.089792488 | 0.099889473 | 0.129237771 |
| ENSG00000163516 | 0.049234237 | 0.043215965 | 0.049362136 | 0.043650533 |
| ENSG00000139780 | 0.016417795 | 0.026026227 | 0.025546198 | 0.017105404 |
| ENSG00000110171 | 0.016191119 | 0.025360971 | 0.025591468 | 0.014749051 |
| ENSG00000143851 | 0.015496419 | 0.024148558 | 0.024187244 | 0.014205346 |
| ENSG00000175445 | 0.016379077 | 0.02485049  | 0.025438006 | 0.01418836  |
| ENSG00000145777 | 0.017490732 | 0.025756885 | 0.025910087 | 0.015805938 |
| ENSG00000116761 | 0.062796042 | 0.056819055 | 0.046801342 | 0.049033818 |
| ENSG00000181191 | 0.031040309 | 0.038384687 | 0.032168535 | 0.029751823 |
| ENSG00000083457 | 0.041405639 | 0.040006755 | 0.039045389 | 0.033672483 |
| ENSG00000087365 | 0.020666066 | 0.027585907 | 0.030335297 | 0.017744754 |
| ENSG00000086991 | 0.019237163 | 0.025599311 | 0.027838173 | 0.017140701 |
| ENSG00000145703 | 0.054166931 | 0.040284148 | 0.036120661 | 0.029880407 |
| ENSG00000169840 | 0.014561464 | 0.024773237 | 0.025231604 | 0.014011574 |
| ENSG00000185737 | 0.016912915 | 0.024232179 | 0.026045797 | 0.015433855 |
| ENSG00000243477 | 0.038725023 | 0.033657846 | 0.033110796 | 0.030267787 |
| ENSG00000109452 | 0.109221385 | 0.045816278 | 0.039807974 | 0.04226725  |
| ENSG00000121413 | 0.106621979 | 0.070807226 | 0.089898483 | 0.092268877 |
| ENSG00000158813 | 0.019041334 | 0.026493057 | 0.027297897 | 0.019078578 |
| ENSG00000152954 | 0.020993386 | 0.027467279 | 0.025883879 | 0.024206947 |
| ENSG00000167617 | 0.117824525 | 0.089368842 | 0.077971939 | 0.081089281 |
| ENSG00000167157 | 0.017629525 | 0.025136976 | 0.025515672 | 0.016523006 |
| ENSG00000165898 | 0.026971331 | 0.031967957 | 0.028828858 | 0.019869567 |
| ENSG00000119508 | 0.040592463 | 0.046623471 | 0.046985184 | 0.033129577 |
| ENSG00000155816 | 0.016046985 | 0.024905439 | 0.025168528 | 0.01405759  |
| ENSG00000180198 | 0.040692595 | 0.033946201 | 0.033555271 | 0.03387404  |
| ENSG00000188039 | 0.025349063 | 0.02835129  | 0.029663328 | 0.021557023 |
| ENSG00000150593 | 0.016038374 | 0.025821057 | 0.024674715 | 0.017710677 |
| ENSG00000117335 | 0.033517773 | 0.037231727 | 0.033003855 | 0.028195039 |
| ENSG00000101448 | 0.015773592 | 0.024909009 | 0.024282702 | 0.015773093 |
| ENSG00000176547 | 0.015957378 | 0.024414722 | 0.024970405 | 0.015243302 |
| ENSG00000176401 | 0.040248203 | 0.041579232 | 0.035139789 | 0.029041361 |

|                 |             |             |             |             |
|-----------------|-------------|-------------|-------------|-------------|
| ENSG00000134323 | 0.01694557  | 0.024727863 | 0.023632794 | 0.016631817 |
| ENSG00000197635 | 0.083911524 | 0.066313385 | 0.056535353 | 0.075853779 |
| ENSG00000049089 | 0.036385932 | 0.031258522 | 0.038038853 | 0.037273876 |
| ENSG00000205076 | 0.015080198 | 0.024814563 | 0.025213834 | 0.015502909 |
| ENSG00000101203 | 0.017847307 | 0.025816334 | 0.027011982 | 0.0165198   |
| ENSG00000102316 | 0.023008702 | 0.029811425 | 0.03256865  | 0.022219297 |
| ENSG00000235109 | 0.032722795 | 0.035932303 | 0.03597612  | 0.030553111 |
| ENSG00000168385 | 0.020140475 | 0.029259773 | 0.027911627 | 0.020287503 |
| ENSG00000101282 | 0.015061225 | 0.025550263 | 0.025891655 | 0.015671418 |
| ENSG00000107341 | 0.028060458 | 0.031714277 | 0.030008229 | 0.024043948 |
| ENSG00000050327 | 0.048618876 | 0.037008134 | 0.044401077 | 0.034463631 |
| ENSG00000101138 | 0.02896633  | 0.033240786 | 0.034331444 | 0.023513257 |
| ENSG00000147124 | 0.015418345 | 0.025059464 | 0.024730651 | 0.016749074 |
| ENSG00000102445 | 0.102590702 | 0.065324643 | 0.080728426 | 0.090829987 |
| ENSG00000164867 | 0.016592002 | 0.024969799 | 0.025492367 | 0.017158832 |
| ENSG00000171827 | 0.031082293 | 0.032935524 | 0.033726582 | 0.028465363 |
| ENSG00000197050 | 0.038698318 | 0.038860349 | 0.031911021 | 0.043280785 |
| ENSG00000162194 | 0.027574747 | 0.030884559 | 0.03251694  | 0.038788634 |
| ENSG00000158987 | 0.024245129 | 0.032845108 | 0.0310757   | 0.021151261 |
| ENSG00000102981 | 0.043019683 | 0.043816562 | 0.038978453 | 0.033226645 |
| ENSG00000131966 | 0.029633421 | 0.034812964 | 0.030626431 | 0.030054077 |
| ENSG00000118482 | 0.024868125 | 0.030813174 | 0.030296023 | 0.023082041 |
| ENSG00000078081 | 0.051641969 | 0.03675075  | 0.043185613 | 0.041499566 |
| ENSG00000085449 | 0.034785701 | 0.038052475 | 0.037922627 | 0.024731095 |
| ENSG00000135926 | 0.039000852 | 0.037285533 | 0.037244807 | 0.039021524 |
| ENSG00000204296 | 0.015865699 | 0.02438501  | 0.024246871 | 0.01432435  |
| ENSG00000112664 | 0.029601816 | 0.033318017 | 0.036526545 | 0.028260049 |
| ENSG00000123561 | 0.015605951 | 0.025224237 | 0.025145495 | 0.014649523 |
| ENSG00000156140 | 0.014714475 | 0.02488536  | 0.024706396 | 0.014692145 |
| ENSG00000163071 | 0.078386429 | 0.075112082 | 0.046065909 | 0.059805032 |
| ENSG00000120539 | 0.040046249 | 0.040843324 | 0.041722661 | 0.044235035 |
| ENSG00000175215 | 0.02927978  | 0.03571145  | 0.032045447 | 0.025868424 |
| ENSG00000169836 | 0.016125276 | 0.026442033 | 0.024763826 | 0.016084421 |
| ENSG00000096264 | 0.025862721 | 0.029830525 | 0.025448099 | 0.018040246 |
| ENSG00000198382 | 0.025777573 | 0.031094177 | 0.033809398 | 0.025469594 |
| ENSG00000144355 | 0.019214751 | 0.024952513 | 0.026816729 | 0.018096429 |
| ENSG00000170448 | 0.032836171 | 0.032601129 | 0.031401404 | 0.026501556 |
| ENSG00000197037 | 0.0172593   | 0.027221638 | 0.026226102 | 0.017250717 |
| ENSG00000130695 | 0.020913662 | 0.026063245 | 0.029662593 | 0.015679723 |
| ENSG00000135002 | 0.027163656 | 0.032815093 | 0.032636436 | 0.025373404 |
| ENSG00000151779 | 0.032544214 | 0.035212245 | 0.032465754 | 0.027688106 |
| ENSG00000204466 | 0.015516629 | 0.024710215 | 0.024102012 | 0.014925528 |
| ENSG00000125967 | 0.033641794 | 0.034459879 | 0.034235069 | 0.034468963 |
| ENSG00000161677 | 0.033677641 | 0.034467881 | 0.03397512  | 0.034129777 |
| ENSG00000237441 | 0.029636525 | 0.03482543  | 0.035018119 | 0.031837686 |
| ENSG00000157741 | 0.022274107 | 0.027736332 | 0.030726605 | 0.023711675 |
| ENSG00000166452 | 0.014997226 | 0.024673368 | 0.024489264 | 0.015257825 |
| ENSG00000105321 | 0.033328278 | 0.036330615 | 0.040960041 | 0.028417557 |
| ENSG00000168096 | 0.017226362 | 0.027253111 | 0.02677851  | 0.016961765 |
| ENSG00000198400 | 0.021141175 | 0.026971817 | 0.028337463 | 0.021531815 |
| ENSG00000133067 | 0.01487951  | 0.025630736 | 0.024397819 | 0.015823622 |
| ENSG00000030066 | 0.029050843 | 0.036220852 | 0.033242004 | 0.026880498 |
| ENSG00000204174 | 0.014410219 | 0.024419194 | 0.024257896 | 0.015028162 |
| ENSG00000152611 | 0.022658613 | 0.026054928 | 0.026075249 | 0.016212829 |

|                 |             |             |             |             |
|-----------------|-------------|-------------|-------------|-------------|
| ENSG00000173744 | 0.026114617 | 0.033714173 | 0.029350865 | 0.022351556 |
| ENSG00000188171 | 0.078342208 | 0.060928231 | 0.048559214 | 0.065094617 |
| ENSG00000155229 | 0.03386075  | 0.036438211 | 0.034483633 | 0.03104949  |
| ENSG00000157426 | 0.031576111 | 0.038975442 | 0.034110427 | 0.022342135 |
| ENSG00000152128 | 0.096034727 | 0.094393723 | 0.088370913 | 0.103871607 |
| ENSG00000166926 | 0.050286384 | 0.034074476 | 0.030700592 | 0.040028252 |
| ENSG00000185332 | 0.015714629 | 0.025349155 | 0.025950667 | 0.01450596  |
| ENSG00000072041 | 0.015001525 | 0.024682196 | 0.024612176 | 0.016254889 |
| ENSG00000160325 | 0.018894495 | 0.029623364 | 0.028373015 | 0.022233353 |
| ENSG00000133454 | 0.112008205 | 0.109222406 | 0.066889966 | 0.071806261 |
| ENSG00000136099 | 0.017426411 | 0.025120445 | 0.024824164 | 0.015636535 |
| ENSG00000160323 | 0.016133949 | 0.025783653 | 0.024670083 | 0.015762933 |
| ENSG00000137700 | 0.035989963 | 0.033595349 | 0.030481505 | 0.029535915 |
| ENSG00000198453 | 0.034372604 | 0.03599676  | 0.037513747 | 0.042644487 |
| ENSG00000170835 | 0.025241054 | 0.031095032 | 0.02785248  | 0.025898773 |
| ENSG00000133704 | 0.029681896 | 0.033116334 | 0.03401796  | 0.021550811 |
| ENSG00000001167 | 0.025766273 | 0.032627072 | 0.031886312 | 0.023250867 |
| ENSG00000198920 | 0.032194761 | 0.041115587 | 0.030181925 | 0.029942501 |
| ENSG00000110429 | 0.018518017 | 0.026100863 | 0.026510098 | 0.017052769 |
| ENSG00000158517 | 0.035541411 | 0.036661222 | 0.033578634 | 0.029228234 |
| ENSG00000089902 | 0.018891823 | 0.026660596 | 0.026490501 | 0.017833216 |
| ENSG00000140379 | 0.036421737 | 0.043780623 | 0.041099814 | 0.039226382 |
| ENSG00000177981 | 0.022567739 | 0.031332221 | 0.034809129 | 0.019448429 |
| ENSG00000061918 | 0.141704676 | 0.117172291 | 0.111720392 | 0.107642689 |
| ENSG00000166828 | 0.016107697 | 0.024863821 | 0.024281532 | 0.014851784 |
| ENSG00000171467 | 0.036153803 | 0.044533449 | 0.037404818 | 0.035523714 |
| ENSG00000109205 | 0.014714109 | 0.02461763  | 0.024572366 | 0.015541992 |
| ENSG00000143367 | 0.045791953 | 0.05149498  | 0.045241216 | 0.040935739 |
| ENSG00000163624 | 0.018195782 | 0.026374255 | 0.026281398 | 0.017405116 |
| ENSG00000174939 | 0.021853572 | 0.028226346 | 0.026232604 | 0.017409386 |
| ENSG00000164304 | 0.015165597 | 0.024606569 | 0.024311547 | 0.015564029 |
| ENSG00000171241 | 0.021170783 | 0.027143574 | 0.026081825 | 0.020898179 |
| ENSG00000239590 | 0.017671022 | 0.025322203 | 0.025986922 | 0.01631025  |
| ENSG00000164089 | 0.014909141 | 0.025076877 | 0.024213648 | 0.014400263 |
| ENSG00000155749 | 0.014998894 | 0.025368193 | 0.024618203 | 0.016262817 |
| ENSG00000170075 | 0.014870826 | 0.024698666 | 0.025006125 | 0.015538139 |
| ENSG00000143614 | 0.027543921 | 0.030440012 | 0.037797173 | 0.032575208 |
| ENSG00000243130 | 0.016587611 | 0.025384128 | 0.025680088 | 0.015186789 |
| ENSG00000108292 | 0.017720656 | 0.029759895 | 0.025946527 | 0.022652362 |
| ENSG00000182601 | 0.017626955 | 0.027727841 | 0.028520405 | 0.018947895 |
| ENSG00000173163 | 0.029035583 | 0.030651727 | 0.031385608 | 0.028940029 |
| ENSG00000185291 | 0.068215316 | 0.065891032 | 0.049132511 | 0.067530557 |
| ENSG00000157483 | 0.025146776 | 0.030040337 | 0.02850085  | 0.025720165 |
| ENSG00000132361 | 0.031792119 | 0.030392814 | 0.029973911 | 0.033606259 |
| ENSG00000026297 | 0.045640144 | 0.032559263 | 0.030137073 | 0.025578582 |
| ENSG00000171566 | 0.02308499  | 0.031075273 | 0.028487271 | 0.017930471 |
| ENSG00000166800 | 0.01957487  | 0.026481608 | 0.025469844 | 0.018799665 |
| ENSG00000107021 | 0.022542934 | 0.032182085 | 0.035526001 | 0.02179587  |
| ENSG00000118363 | 0.03186854  | 0.036719471 | 0.030228323 | 0.025716346 |
| ENSG00000181929 | 0.028353823 | 0.031209308 | 0.0312424   | 0.02785137  |
| ENSG00000126705 | 0.02847293  | 0.036564987 | 0.031907172 | 0.032794383 |
| ENSG00000174083 | 0.051516936 | 0.039303232 | 0.040004665 | 0.046954021 |
| ENSG00000007866 | 0.019165197 | 0.024835583 | 0.026901042 | 0.016358604 |
| ENSG00000176788 | 0.043089601 | 0.032068603 | 0.034464593 | 0.02780444  |

|                 |             |             |             |             |
|-----------------|-------------|-------------|-------------|-------------|
| ENSG00000180638 | 0.015759453 | 0.024612321 | 0.024601902 | 0.015555846 |
| ENSG00000162852 | 0.031455845 | 0.035091201 | 0.032995287 | 0.025965859 |
| ENSG00000130368 | 0.016792199 | 0.026656635 | 0.027385936 | 0.017074981 |
| ENSG00000106799 | 0.01968963  | 0.026770272 | 0.029745654 | 0.019517325 |
| ENSG00000116791 | 0.046230469 | 0.045775603 | 0.040959053 | 0.040037101 |
| ENSG00000185022 | 0.017503519 | 0.024989503 | 0.02527249  | 0.016686596 |
| ENSG00000239886 | 0.015404123 | 0.024798755 | 0.024819533 | 0.016148566 |
| ENSG00000140945 | 0.015668934 | 0.024343818 | 0.025435919 | 0.015131954 |
| ENSG00000169908 | 0.016044777 | 0.024919365 | 0.024551853 | 0.014441053 |
| ENSG00000010438 | 0.018812039 | 0.02605348  | 0.025246079 | 0.017394121 |
| ENSG00000154319 | 0.08439645  | 0.08877955  | 0.093099405 | 0.089785388 |
| ENSG00000102271 | 0.017308408 | 0.027944527 | 0.026110884 | 0.015412192 |
| ENSG00000129226 | 0.019849405 | 0.029049982 | 0.026814581 | 0.019707426 |
| ENSG00000136696 | 0.015355211 | 0.026028151 | 0.024273612 | 0.015573541 |
| ENSG00000113722 | 0.016129432 | 0.024585191 | 0.024287793 | 0.016066382 |
| ENSG00000242259 | 0.024333022 | 0.031687674 | 0.029121618 | 0.024442698 |
| ENSG00000101447 | 0.056710623 | 0.040110829 | 0.045745725 | 0.043255069 |
| ENSG00000104969 | 0.024098303 | 0.030413108 | 0.034570129 | 0.023071973 |
| ENSG00000148602 | 0.015568508 | 0.025431309 | 0.025238782 | 0.016231692 |
| ENSG00000198547 | 0.017801574 | 0.027227386 | 0.026054351 | 0.016714484 |
| ENSG00000171448 | 0.031123182 | 0.034279405 | 0.031119492 | 0.027118466 |
| ENSG00000110108 | 0.039404226 | 0.032928371 | 0.036296735 | 0.032250948 |
| ENSG00000187013 | 0.01575147  | 0.025240995 | 0.024648495 | 0.016419285 |
| ENSG00000158201 | 0.047330478 | 0.048522406 | 0.036532701 | 0.032055026 |
| ENSG00000070047 | 0.027599686 | 0.034377391 | 0.03244698  | 0.025918748 |
| ENSG00000176024 | 0.029809147 | 0.038594176 | 0.041297444 | 0.025478434 |
| ENSG00000103707 | 0.032048086 | 0.036053908 | 0.032363747 | 0.025577995 |
| ENSG00000183742 | 0.064984625 | 0.055715028 | 0.056996263 | 0.069490556 |
| ENSG00000107281 | 0.065725838 | 0.040240844 | 0.033434842 | 0.046126723 |
| ENSG00000007216 | 0.016208264 | 0.025055065 | 0.024632738 | 0.015428633 |
| ENSG00000183434 | 0.015056827 | 0.02488176  | 0.02427183  | 0.014654492 |
| ENSG00000111843 | 0.024318307 | 0.031680708 | 0.028510197 | 0.024278952 |
| ENSG00000103502 | 0.018124692 | 0.026539795 | 0.027685326 | 0.023533145 |
| ENSG00000130385 | 0.01896688  | 0.024734804 | 0.02484826  | 0.015866746 |
| ENSG00000117419 | 0.024007087 | 0.030659458 | 0.027995723 | 0.020362185 |
| ENSG00000179104 | 0.039206378 | 0.038487059 | 0.035201447 | 0.028270379 |
| ENSG00000122359 | 0.019934831 | 0.025980808 | 0.026516668 | 0.021981049 |
| ENSG00000123191 | 0.018027017 | 0.032257951 | 0.027527846 | 0.022938451 |
| ENSG00000102974 | 0.031461518 | 0.03246234  | 0.031505384 | 0.027055387 |
| ENSG00000140505 | 0.021819631 | 0.025456865 | 0.02564312  | 0.01726246  |
| ENSG00000128928 | 0.040092915 | 0.044858641 | 0.038874843 | 0.034274779 |
| ENSG00000180035 | 0.016373659 | 0.025624388 | 0.025514105 | 0.016080747 |
| ENSG00000198203 | 0.016294431 | 0.025192495 | 0.024814889 | 0.015755166 |
| ENSG00000127125 | 0.025623988 | 0.031433852 | 0.029677213 | 0.035515588 |
| ENSG00000176490 | 0.044192541 | 0.047774781 | 0.040029909 | 0.043006734 |
| ENSG00000072134 | 0.027963597 | 0.031162529 | 0.033367215 | 0.026313721 |
| ENSG00000176383 | 0.017830031 | 0.027179276 | 0.026241799 | 0.018099006 |
| ENSG00000099812 | 0.016403714 | 0.023886618 | 0.024904743 | 0.015334963 |
| ENSG00000176225 | 0.043232723 | 0.040273417 | 0.034766979 | 0.039519937 |
| ENSG00000157445 | 0.016650214 | 0.024605877 | 0.024253529 | 0.014571803 |
| ENSG00000008513 | 0.018591115 | 0.028183568 | 0.026400677 | 0.022135296 |
| ENSG00000116586 | 0.028208919 | 0.032493119 | 0.028433546 | 0.025656574 |
| ENSG00000185730 | 0.031815675 | 0.035063659 | 0.032410006 | 0.03036404  |
| ENSG00000145050 | 0.034317453 | 0.03435671  | 0.037389701 | 0.036484759 |

|                 |             |             |             |             |
|-----------------|-------------|-------------|-------------|-------------|
| ENSG00000101470 | 0.016831071 | 0.024860655 | 0.024582388 | 0.018384203 |
| ENSG00000181458 | 0.08391894  | 0.06443536  | 0.063206352 | 0.064417933 |
| ENSG00000106327 | 0.02233974  | 0.030752677 | 0.027256912 | 0.019299604 |
| ENSG00000108578 | 0.028493328 | 0.033394064 | 0.029510537 | 0.024241332 |
| ENSG00000167768 | 0.015790825 | 0.024226392 | 0.02466552  | 0.015182135 |
| ENSG00000138075 | 0.031473902 | 0.031291571 | 0.029793672 | 0.017579131 |
| ENSG00000151892 | 0.01557343  | 0.025915667 | 0.024882841 | 0.015694274 |
| ENSG00000072657 | 0.016963872 | 0.024224048 | 0.025019165 | 0.01514854  |
| ENSG00000147459 | 0.01902047  | 0.024891738 | 0.025629042 | 0.018668398 |
| ENSG00000115687 | 0.055714187 | 0.050646547 | 0.053631495 | 0.053825928 |
| ENSG00000106034 | 0.015804978 | 0.025135711 | 0.024933703 | 0.015230922 |
| ENSG00000135097 | 0.018902136 | 0.028414767 | 0.027611695 | 0.017482443 |
| ENSG00000145375 | 0.015567444 | 0.02495243  | 0.024397912 | 0.015409929 |
| ENSG00000104814 | 0.027836443 | 0.031689823 | 0.029473475 | 0.025338559 |
| ENSG00000128585 | 0.03018806  | 0.035301344 | 0.033911149 | 0.024755568 |
| ENSG00000010361 | 0.019298168 | 0.02790186  | 0.025466427 | 0.018794819 |
| ENSG00000135517 | 0.015965796 | 0.024944279 | 0.024733781 | 0.014164138 |
| ENSG00000156475 | 0.014788432 | 0.025486242 | 0.025432368 | 0.014427058 |
| ENSG00000100003 | 0.042042943 | 0.03682297  | 0.032240516 | 0.029998544 |
| ENSG00000181847 | 0.01870349  | 0.026556948 | 0.027840075 | 0.015670313 |
| ENSG00000115507 | 0.016158557 | 0.026497033 | 0.025118892 | 0.016305526 |
| ENSG00000167562 | 0.03349866  | 0.037226715 | 0.040596964 | 0.043999171 |
| ENSG00000185787 | 0.020831188 | 0.026828968 | 0.026333401 | 0.018547616 |
| ENSG00000064309 | 0.015290889 | 0.025650172 | 0.025267009 | 0.016131294 |
| ENSG00000128276 | 0.015578616 | 0.024943454 | 0.02476774  | 0.015853171 |
| ENSG00000102524 | 0.064215589 | 0.048920159 | 0.049150967 | 0.057434422 |
| ENSG00000175826 | 0.026045945 | 0.033025389 | 0.041834049 | 0.03789774  |
| ENSG00000176102 | 0.0430993   | 0.050003161 | 0.040287313 | 0.034739696 |
| ENSG00000166961 | 0.018105523 | 0.02598244  | 0.027483294 | 0.016363622 |
| ENSG00000158859 | 0.016489711 | 0.025561685 | 0.025037072 | 0.015221335 |
| ENSG00000103150 | 0.030591692 | 0.039899389 | 0.034773215 | 0.036178201 |
| ENSG00000137673 | 0.204689587 | 0.146915561 | 0.131663118 | 0.16001956  |
| ENSG00000164100 | 0.016082047 | 0.024709189 | 0.024129475 | 0.014807151 |
| ENSG00000127527 | 0.024550272 | 0.032747543 | 0.028892924 | 0.023948291 |
| ENSG00000204852 | 0.054638724 | 0.043474298 | 0.033333723 | 0.045144278 |
| ENSG00000052749 | 0.036969965 | 0.036698804 | 0.037192373 | 0.036705114 |
| ENSG00000174579 | 0.03079814  | 0.039542926 | 0.03623733  | 0.025595441 |
| ENSG00000176742 | 0.017190324 | 0.025567028 | 0.024766567 | 0.014970855 |
| ENSG00000125363 | 0.015157201 | 0.024675391 | 0.025272501 | 0.015814286 |
| ENSG00000198431 | 0.047421836 | 0.042187227 | 0.039605817 | 0.035155788 |
| ENSG00000170803 | 0.019024623 | 0.025924049 | 0.027751014 | 0.017745403 |
| ENSG00000150750 | 0.016717018 | 0.02574251  | 0.025815692 | 0.016760765 |
| ENSG00000130508 | 0.109354792 | 0.130305392 | 0.099686832 | 0.125314177 |
| ENSG00000196767 | 0.015772086 | 0.024810616 | 0.024486627 | 0.014836826 |
| ENSG00000166816 | 0.01749105  | 0.025717799 | 0.0256635   | 0.017522394 |
| ENSG00000072682 | 0.097839278 | 0.063698435 | 0.06213783  | 0.074422912 |
| ENSG00000187840 | 0.042208722 | 0.031434232 | 0.031984412 | 0.029689528 |
| ENSG00000159455 | 0.015713913 | 0.025029335 | 0.024818963 | 0.015693856 |
| ENSG00000007314 | 0.016100123 | 0.02603141  | 0.024562531 | 0.014984013 |
| ENSG00000142515 | 0.015979204 | 0.025508617 | 0.025650536 | 0.014349552 |
| ENSG00000114554 | 0.043141158 | 0.03690123  | 0.036242823 | 0.039150739 |
| ENSG00000160202 | 0.017266376 | 0.025639366 | 0.025874296 | 0.015281448 |
| ENSG00000004660 | 0.0149606   | 0.023911478 | 0.024582647 | 0.0143303   |
| ENSG00000134184 | 0.202087581 | 0.184818758 | 0.165499833 | 0.16917334  |



|                 |             |             |             |             |
|-----------------|-------------|-------------|-------------|-------------|
| ENSG0000072694  | 0.057900079 | 0.051840145 | 0.048107508 | 0.060102158 |
| ENSG00000178996 | 0.016992864 | 0.02480386  | 0.024536804 | 0.015286803 |
| ENSG00000165496 | 0.015388739 | 0.025551574 | 0.025678692 | 0.016381917 |
| ENSG00000162782 | 0.019887334 | 0.025736849 | 0.024891909 | 0.017942569 |
| ENSG00000165389 | 0.034782482 | 0.036905461 | 0.034034961 | 0.03059118  |
| ENSG00000135972 | 0.02672556  | 0.031468888 | 0.028848055 | 0.023739071 |
| ENSG00000140443 | 0.015472364 | 0.024684436 | 0.025266222 | 0.015109258 |
| ENSG00000124209 | 0.034676897 | 0.040926684 | 0.03662952  | 0.031357596 |
| ENSG00000204131 | 0.016551906 | 0.024892362 | 0.024338659 | 0.015690231 |
| ENSG00000137845 | 0.034269093 | 0.039733482 | 0.037108257 | 0.026461625 |
| ENSG00000100106 | 0.033087019 | 0.032184854 | 0.031403915 | 0.027278093 |
| ENSG00000211456 | 0.032428031 | 0.033689528 | 0.030928137 | 0.041981838 |
| ENSG00000114446 | 0.040974959 | 0.04082242  | 0.0370246   | 0.035703322 |
| ENSG00000134779 | 0.051814857 | 0.046960885 | 0.044742622 | 0.034426241 |
| ENSG00000086189 | 0.02397562  | 0.033040695 | 0.028823673 | 0.023497854 |
| ENSG00000145632 | 0.055783814 | 0.047395675 | 0.040639052 | 0.041493759 |
| ENSG00000103254 | 0.035502928 | 0.032948127 | 0.03264287  | 0.030963868 |
| ENSG00000185418 | 0.038256215 | 0.040476786 | 0.040375246 | 0.036013079 |
| ENSG00000154736 | 0.016634238 | 0.025476702 | 0.026958831 | 0.016020325 |
| ENSG00000225697 | 0.03213253  | 0.035530782 | 0.029880791 | 0.037297668 |
| ENSG00000109686 | 0.016772119 | 0.024734522 | 0.024683726 | 0.015940852 |
| ENSG00000183067 | 0.015626737 | 0.025481867 | 0.024345915 | 0.0156227   |
| ENSG00000148346 | 0.015786776 | 0.025569249 | 0.025226965 | 0.014871201 |
| ENSG00000147457 | 0.036360118 | 0.035286932 | 0.033880027 | 0.02512192  |
| ENSG00000180772 | 0.01574225  | 0.024431941 | 0.02570387  | 0.016115955 |
| ENSG00000182004 | 0.019967656 | 0.026106855 | 0.025891993 | 0.018282951 |
| ENSG00000116690 | 0.017010306 | 0.02581257  | 0.026570653 | 0.017542768 |
| ENSG00000136014 | 0.015304436 | 0.025051908 | 0.024758382 | 0.014590092 |
| ENSG00000197870 | 0.016149347 | 0.024508443 | 0.024925459 | 0.015447279 |
| ENSG00000100348 | 0.024290794 | 0.026356805 | 0.031418695 | 0.025131006 |
| ENSG00000172404 | 0.015490362 | 0.025481229 | 0.024438729 | 0.016419586 |
| ENSG00000068976 | 0.017035565 | 0.024767558 | 0.02504247  | 0.015010038 |
| ENSG00000086061 | 0.031077608 | 0.033112157 | 0.029571148 | 0.024958912 |
| ENSG00000137100 | 0.020898115 | 0.027442501 | 0.02879966  | 0.017029116 |
| ENSG00000126226 | 0.029538369 | 0.032224501 | 0.030687255 | 0.025514021 |
| ENSG00000178921 | 0.03807592  | 0.03680176  | 0.033811021 | 0.032802198 |
| ENSG00000174721 | 0.015585115 | 0.025889921 | 0.025053905 | 0.016653079 |
| ENSG00000170647 | 0.034217902 | 0.033329202 | 0.029105575 | 0.031632143 |
| ENSG00000154359 | 0.042809817 | 0.042694481 | 0.038314517 | 0.036744083 |
| ENSG00000135535 | 0.023896607 | 0.031259855 | 0.029521457 | 0.022238273 |
| ENSG00000173610 | 0.04616538  | 0.035041808 | 0.025302888 | 0.028705797 |
| ENSG00000140368 | 0.068522601 | 0.061670336 | 0.044238355 | 0.061962694 |
| ENSG00000183048 | 0.051526914 | 0.039457819 | 0.046625499 | 0.039814768 |
| ENSG00000148735 | 0.015326707 | 0.02491033  | 0.024620316 | 0.016640232 |
| ENSG00000162909 | 0.099251968 | 0.07152148  | 0.068814359 | 0.075547629 |
| ENSG00000161921 | 0.037799464 | 0.033532241 | 0.031360645 | 0.040890108 |
| ENSG00000141429 | 0.032065019 | 0.037235987 | 0.032079443 | 0.033914438 |
| ENSG00000186625 | 0.026214137 | 0.036640739 | 0.033734388 | 0.026256328 |
| ENSG00000138468 | 0.020883997 | 0.030809705 | 0.028120886 | 0.022159499 |
| ENSG00000231389 | 0.017171188 | 0.027463257 | 0.025796099 | 0.020870041 |
| ENSG00000133116 | 0.09514386  | 0.07542626  | 0.046067662 | 0.07495192  |
| ENSG00000164080 | 0.023342713 | 0.032089654 | 0.035227146 | 0.025877227 |
| ENSG00000103507 | 0.032414994 | 0.029441006 | 0.033114526 | 0.028614466 |
| ENSG00000145949 | 0.015484725 | 0.024260941 | 0.023830807 | 0.015396316 |

|                 |             |             |             |             |
|-----------------|-------------|-------------|-------------|-------------|
| ENSG00000136783 | 0.043501724 | 0.04986632  | 0.036654277 | 0.074141181 |
| ENSG00000113303 | 0.015288899 | 0.024669276 | 0.024586095 | 0.014663926 |
| ENSG00000100614 | 0.017450729 | 0.02588578  | 0.02757722  | 0.016046414 |
| ENSG00000134531 | 0.036753578 | 0.036350245 | 0.033074619 | 0.023949475 |
| ENSG00000165525 | 0.025654616 | 0.03402358  | 0.029672744 | 0.023838864 |
| ENSG00000198366 | 0.039922139 | 0.032333224 | 0.041364704 | 0.046782175 |
| ENSG00000065243 | 0.028284619 | 0.034697195 | 0.035833536 | 0.022963009 |
| ENSG00000182093 | 0.031193211 | 0.038381433 | 0.032879133 | 0.029830367 |
| ENSG00000070882 | 0.037153952 | 0.038174339 | 0.038077134 | 0.037665016 |
| ENSG00000166971 | 0.030616262 | 0.035480353 | 0.037516734 | 0.029598953 |
| ENSG00000171204 | 0.026350685 | 0.033683716 | 0.029272598 | 0.020666881 |
| ENSG00000138617 | 0.02794627  | 0.028981754 | 0.029236787 | 0.022077674 |
| ENSG00000143494 | 0.07007774  | 0.05606889  | 0.050912097 | 0.070439292 |
| ENSG00000025434 | 0.01742553  | 0.029623065 | 0.027548184 | 0.021576095 |
| ENSG00000187555 | 0.027061253 | 0.033007583 | 0.032911897 | 0.023214874 |
| ENSG00000128519 | 0.016387231 | 0.02548386  | 0.024330429 | 0.016161704 |
| ENSG00000162892 | 0.018252278 | 0.025211721 | 0.027889166 | 0.016222876 |
| ENSG00000141736 | 0.017041025 | 0.025097011 | 0.026437494 | 0.017520054 |
| ENSG00000141503 | 0.014209612 | 0.024819445 | 0.02492035  | 0.014765453 |
| ENSG00000125730 | 0.020838438 | 0.035355005 | 0.026958101 | 0.029304377 |
| ENSG00000106078 | 0.017853897 | 0.025919084 | 0.02768896  | 0.017360273 |
| ENSG00000155008 | 0.045166103 | 0.050588338 | 0.045088115 | 0.042068148 |
| ENSG00000204503 | 0.0204188   | 0.027487624 | 0.030256421 | 0.016685121 |
| ENSG00000143196 | 0.01581329  | 0.025843113 | 0.02594572  | 0.016269387 |
| ENSG00000066933 | 0.037568154 | 0.039405612 | 0.037740529 | 0.034212539 |
| ENSG00000169962 | 0.013586174 | 0.023764781 | 0.024376185 | 0.013633511 |
| ENSG00000081377 | 0.044939701 | 0.02728367  | 0.024995762 | 0.026118618 |
| ENSG00000135069 | 0.058989371 | 0.047523822 | 0.041310915 | 0.050995441 |
| ENSG00000136872 | 0.058856215 | 0.02512173  | 0.024713434 | 0.017677542 |
| ENSG00000196372 | 0.018320943 | 0.02739352  | 0.030243429 | 0.017896614 |
| ENSG00000139233 | 0.02485901  | 0.03305313  | 0.033082589 | 0.024614829 |
| ENSG00000242498 | 0.017496575 | 0.026197645 | 0.024835905 | 0.023702336 |
| ENSG00000157601 | 0.037276895 | 0.033373031 | 0.037533209 | 0.037722882 |
| ENSG00000187764 | 0.028426391 | 0.03372784  | 0.030549657 | 0.023327192 |
| ENSG00000146857 | 0.015459651 | 0.024294186 | 0.02469189  | 0.014974343 |
| ENSG00000015479 | 0.022028766 | 0.029526702 | 0.02698206  | 0.021510146 |
| ENSG00000133056 | 0.020670079 | 0.030199182 | 0.028747277 | 0.021365608 |
| ENSG00000071127 | 0.02744147  | 0.03259549  | 0.032149885 | 0.031961255 |
| ENSG00000100341 | 0.017439274 | 0.025390314 | 0.025607989 | 0.016740558 |
| ENSG00000011007 | 0.027213261 | 0.034001238 | 0.037796584 | 0.027618302 |
| ENSG00000133243 | 0.024566694 | 0.029410023 | 0.029813978 | 0.024217175 |
| ENSG00000156804 | 0.016363387 | 0.025171458 | 0.024854307 | 0.016340701 |
| ENSG00000168124 | 0.018011111 | 0.025003752 | 0.025235331 | 0.015370606 |
| ENSG00000173406 | 0.015695715 | 0.025209317 | 0.025969879 | 0.015472739 |
| ENSG00000136867 | 0.028059698 | 0.035446714 | 0.036561528 | 0.021894772 |
| ENSG00000179142 | 0.017234746 | 0.026169727 | 0.025538436 | 0.016925354 |
| ENSG00000007129 | 0.031099315 | 0.037627231 | 0.041412279 | 0.036323549 |
| ENSG00000154768 | 0.016876054 | 0.025743234 | 0.024328986 | 0.01613117  |
| ENSG00000121931 | 0.033747252 | 0.040380212 | 0.037877236 | 0.032229147 |
| ENSG00000100351 | 0.094999276 | 0.073994621 | 0.060142086 | 0.074155422 |
| ENSG00000186166 | 0.032291678 | 0.03483645  | 0.034725096 | 0.027405384 |
| ENSG00000136950 | 0.027983373 | 0.031916018 | 0.035704577 | 0.031709389 |
| ENSG00000041982 | 0.022340175 | 0.026562706 | 0.026397575 | 0.020366966 |
| ENSG00000186105 | 0.04555381  | 0.036294154 | 0.035868063 | 0.034563627 |

|                 |             |             |             |             |
|-----------------|-------------|-------------|-------------|-------------|
| ENSG00000239474 | 0.015526003 | 0.026352663 | 0.027018654 | 0.015979561 |
| ENSG00000182330 | 0.027867856 | 0.024405189 | 0.026364794 | 0.015278867 |
| ENSG00000169372 | 0.034227132 | 0.036584914 | 0.034004782 | 0.023832343 |
| ENSG00000188921 | 0.031567516 | 0.033801738 | 0.032281157 | 0.026493036 |
| ENSG00000185340 | 0.015446024 | 0.025182988 | 0.025436598 | 0.015459809 |
| ENSG00000169855 | 0.020714048 | 0.025464502 | 0.025805521 | 0.015355198 |
| ENSG00000152661 | 0.016702932 | 0.024865684 | 0.024862977 | 0.016445924 |
| ENSG00000116815 | 0.024380543 | 0.029989285 | 0.028554048 | 0.02577007  |
| ENSG00000056998 | 0.015650743 | 0.024265079 | 0.02441574  | 0.015120364 |
| ENSG00000176340 | 0.018665207 | 0.025390584 | 0.02609897  | 0.018466661 |
| ENSG00000080986 | 0.044955665 | 0.03787861  | 0.036462901 | 0.037714273 |
| ENSG00000169914 | 0.018430406 | 0.026763365 | 0.027015054 | 0.017544206 |
| ENSG00000182611 | 0.018916177 | 0.027068721 | 0.025439129 | 0.016190981 |
| ENSG00000128250 | 0.018319656 | 0.027196302 | 0.02608076  | 0.01780557  |
| ENSG00000100823 | 0.022282309 | 0.027750545 | 0.026260033 | 0.019429444 |
| ENSG00000197927 | 0.039538444 | 0.041811057 | 0.045443982 | 0.045317106 |
| ENSG00000198934 | 0.020617446 | 0.02660439  | 0.026001112 | 0.017985922 |
| ENSG00000006625 | 0.031676773 | 0.034171261 | 0.029401085 | 0.027453981 |
| ENSG00000187664 | 0.016774719 | 0.02616415  | 0.025293721 | 0.016083242 |
| ENSG00000031691 | 0.040038487 | 0.037000447 | 0.032593807 | 0.035275725 |
| ENSG00000143947 | 0.017611757 | 0.024821725 | 0.024790453 | 0.020578445 |
| ENSG00000145365 | 0.039186676 | 0.043961849 | 0.038568507 | 0.034721094 |
| ENSG00000116688 | 0.026941266 | 0.033133002 | 0.031589191 | 0.025372637 |
| ENSG00000119878 | 0.034113727 | 0.03897659  | 0.03473349  | 0.024402341 |
| ENSG00000099624 | 0.021408078 | 0.026836169 | 0.028497735 | 0.021724143 |
| ENSG00000121858 | 0.071042481 | 0.066745672 | 0.073794963 | 0.065301039 |
| ENSG00000013523 | 0.027723179 | 0.028026993 | 0.028639344 | 0.022002765 |
| ENSG00000107897 | 0.030571047 | 0.037304441 | 0.032265912 | 0.033430633 |
| ENSG00000122863 | 0.019878012 | 0.029205587 | 0.025635743 | 0.022994381 |
| ENSG00000123405 | 0.018866115 | 0.02549702  | 0.025547035 | 0.014596715 |
| ENSG00000160994 | 0.016508516 | 0.025568904 | 0.02582758  | 0.017826037 |
| ENSG00000102081 | 0.034281084 | 0.040387892 | 0.032281699 | 0.030681901 |
| ENSG00000157214 | 0.075196108 | 0.049214813 | 0.041208011 | 0.049016683 |
| ENSG00000188086 | 0.016866518 | 0.025368532 | 0.025456593 | 0.022403957 |
| ENSG00000107593 | 0.016236643 | 0.024300201 | 0.024754798 | 0.016796178 |
| ENSG00000144908 | 0.029433907 | 0.025216942 | 0.027064558 | 0.020848466 |
| ENSG00000078898 | 0.015609247 | 0.024875266 | 0.024499621 | 0.01510654  |
| ENSG00000243364 | 0.038432718 | 0.036017587 | 0.035838891 | 0.035706648 |
| ENSG00000070388 | 0.016024969 | 0.024598649 | 0.024283984 | 0.016036953 |
| ENSG00000188690 | 0.034311382 | 0.03827538  | 0.039301417 | 0.032108611 |
| ENSG00000185808 | 0.028298154 | 0.030292427 | 0.032137166 | 0.026280389 |
| ENSG00000090372 | 0.026416526 | 0.030825253 | 0.040244656 | 0.029736266 |
| ENSG00000076513 | 0.034120518 | 0.036183133 | 0.032941083 | 0.02902812  |
| ENSG00000184148 | 0.016101244 | 0.024853084 | 0.025034452 | 0.016309823 |
| ENSG00000127588 | 0.017851757 | 0.026173012 | 0.026755969 | 0.016489988 |
| ENSG00000165548 | 0.016194267 | 0.025095796 | 0.024863038 | 0.014320006 |
| ENSG00000140961 | 0.016613757 | 0.025773384 | 0.024349996 | 0.016032387 |
| ENSG00000023839 | 0.018189654 | 0.027265598 | 0.026239621 | 0.017379225 |
| ENSG00000184281 | 0.031891576 | 0.036508874 | 0.04018149  | 0.034370021 |
| ENSG00000100201 | 0.043130299 | 0.04896487  | 0.060666694 | 0.072792305 |
| ENSG00000136152 | 0.029465328 | 0.0356921   | 0.034267926 | 0.026203538 |
| ENSG00000087995 | 0.02906815  | 0.033772165 | 0.032332259 | 0.029036377 |
| ENSG00000100228 | 0.025369777 | 0.026937184 | 0.032839861 | 0.019410287 |
| ENSG00000112739 | 0.040325962 | 0.03884961  | 0.031668605 | 0.032123562 |

|                 |             |             |             |             |
|-----------------|-------------|-------------|-------------|-------------|
| ENSG00000206418 | 0.048885253 | 0.06155834  | 0.04367876  | 0.064204653 |
| ENSG00000027001 | 0.035641902 | 0.039625662 | 0.036248123 | 0.028172571 |
| ENSG00000156413 | 0.029795559 | 0.030172766 | 0.032822474 | 0.025967647 |
| ENSG00000159899 | 0.025662777 | 0.028417857 | 0.030586534 | 0.021696948 |
| ENSG00000151623 | 0.01582568  | 0.024696924 | 0.025826561 | 0.016008685 |
| ENSG00000196177 | 0.039415365 | 0.041772507 | 0.038426253 | 0.043006715 |
| ENSG00000111832 | 0.019892955 | 0.027716991 | 0.026864685 | 0.019239905 |
| ENSG00000188682 | 0.016501401 | 0.026122987 | 0.024501685 | 0.014622718 |
| ENSG00000198488 | 0.016925483 | 0.025922235 | 0.02620925  | 0.017400351 |
| ENSG00000196431 | 0.01634601  | 0.025566636 | 0.026977006 | 0.015587402 |
| ENSG00000131097 | 0.015881586 | 0.025957134 | 0.025237957 | 0.016634154 |
| ENSG00000198171 | 0.030071853 | 0.031677598 | 0.034198999 | 0.024861939 |
| ENSG00000159885 | 0.027466204 | 0.036848569 | 0.03615764  | 0.021698858 |
| ENSG00000087916 | 0.018169738 | 0.024643114 | 0.026129813 | 0.015561641 |
| ENSG00000198551 | 0.032053602 | 0.037196669 | 0.034153337 | 0.027685826 |
| ENSG00000136840 | 0.039424247 | 0.038744059 | 0.041139787 | 0.035359133 |
| ENSG00000143319 | 0.03060584  | 0.033607104 | 0.039581764 | 0.030558036 |
| ENSG00000204427 | 0.030051358 | 0.030207711 | 0.034143202 | 0.027910688 |
| ENSG00000100433 | 0.015332686 | 0.024650143 | 0.025380722 | 0.014453153 |
| ENSG00000178199 | 0.01623689  | 0.024544363 | 0.025181113 | 0.015219009 |
| ENSG00000134755 | 0.113779297 | 0.055258228 | 0.029879957 | 0.053414904 |
| ENSG00000240505 | 0.046481349 | 0.038555253 | 0.033389063 | 0.032360983 |
| ENSG00000065548 | 0.021784186 | 0.029404521 | 0.030129192 | 0.024423831 |
| ENSG00000131016 | 0.015768717 | 0.024543202 | 0.024325983 | 0.015685424 |
| ENSG00000184898 | 0.016603368 | 0.025357724 | 0.024397496 | 0.014978073 |
| ENSG00000205495 | 0.017065606 | 0.025172082 | 0.025305092 | 0.017174951 |
| ENSG00000166578 | 0.016496587 | 0.025608179 | 0.025073023 | 0.014332436 |
| ENSG00000162344 | 0.01712521  | 0.026003095 | 0.026732836 | 0.016027307 |
| ENSG00000103642 | 0.035199929 | 0.037429988 | 0.037055809 | 0.030060454 |
| ENSG00000145358 | 0.099481698 | 0.074099322 | 0.082696351 | 0.079141037 |
| ENSG00000105676 | 0.029374218 | 0.030069777 | 0.03368158  | 0.033402605 |
| ENSG00000108515 | 0.045275767 | 0.047068403 | 0.03927339  | 0.039795184 |
| ENSG00000176567 | 0.024244865 | 0.029390649 | 0.030552811 | 0.021104115 |
| ENSG00000112796 | 0.068663034 | 0.052887837 | 0.04290396  | 0.061863259 |
| ENSG00000070010 | 0.023838972 | 0.031951083 | 0.029270913 | 0.028085143 |
| ENSG00000197614 | 0.027690424 | 0.029887996 | 0.030805612 | 0.033145715 |
| ENSG00000187522 | 0.029154269 | 0.033502692 | 0.035884545 | 0.03029932  |
| ENSG00000104518 | 0.035008832 | 0.037830636 | 0.035235432 | 0.030272748 |
| ENSG00000164393 | 0.016194438 | 0.024678595 | 0.024803097 | 0.016028195 |
| ENSG00000159079 | 0.015772834 | 0.024418781 | 0.024982781 | 0.014832026 |
| ENSG00000090621 | 0.036703708 | 0.035182428 | 0.035799696 | 0.037940131 |
| ENSG00000141030 | 0.030070062 | 0.032778146 | 0.033801207 | 0.027314077 |
| ENSG00000180537 | 0.014605261 | 0.024405334 | 0.024480543 | 0.014299416 |
| ENSG00000148948 | 0.070521606 | 0.049143234 | 0.050861751 | 0.043488884 |
| ENSG00000141665 | 0.021535368 | 0.028794986 | 0.026077138 | 0.018306442 |
| ENSG00000180616 | 0.070353439 | 0.05050777  | 0.043736687 | 0.053880379 |
| ENSG00000131844 | 0.035002299 | 0.044348952 | 0.033033577 | 0.032558358 |
| ENSG00000179218 | 0.035475943 | 0.035980369 | 0.03633577  | 0.039677255 |
| ENSG00000186881 | 0.015662762 | 0.024878754 | 0.025718493 | 0.015453121 |
| ENSG00000110048 | 0.021340409 | 0.028648639 | 0.034093378 | 0.021252486 |
| ENSG00000154721 | 0.081658787 | 0.051667711 | 0.057478556 | 0.055929923 |
| ENSG00000169230 | 0.032793475 | 0.033071283 | 0.03019261  | 0.031676933 |
| ENSG00000183098 | 0.016416694 | 0.0264163   | 0.027282469 | 0.019095883 |
| ENSG00000130165 | 0.021683749 | 0.028204471 | 0.029757346 | 0.018761071 |

|                 |             |             |             |             |
|-----------------|-------------|-------------|-------------|-------------|
| ENSG00000142409 | 0.054002935 | 0.049942685 | 0.053047455 | 0.035694151 |
| ENSG00000065427 | 0.026079876 | 0.029810949 | 0.02864386  | 0.01870709  |
| ENSG00000102383 | 0.017624079 | 0.025457061 | 0.025740637 | 0.017422415 |
| ENSG00000140259 | 0.024597568 | 0.032782409 | 0.031251258 | 0.020599333 |
| ENSG00000147437 | 0.018906149 | 0.028901611 | 0.027249039 | 0.02065134  |
| ENSG00000169435 | 0.116721999 | 0.08676646  | 0.079006654 | 0.09404154  |
| ENSG00000196605 | 0.015431388 | 0.026660838 | 0.024532337 | 0.017856698 |
| ENSG00000204421 | 0.015892254 | 0.023693295 | 0.024083368 | 0.01448074  |
| ENSG00000147251 | 0.03039445  | 0.037449344 | 0.036428769 | 0.032779188 |
| ENSG00000133216 | 0.02855451  | 0.029879527 | 0.027808011 | 0.036076857 |
| ENSG00000142632 | 0.028047718 | 0.029596148 | 0.032374729 | 0.025712367 |
| ENSG00000100302 | 0.016656603 | 0.02639359  | 0.02595308  | 0.019147171 |
| ENSG00000213937 | 0.017009658 | 0.025703386 | 0.024633409 | 0.016243817 |
| ENSG00000145451 | 0.015378291 | 0.025234278 | 0.025359048 | 0.01519635  |
| ENSG00000179958 | 0.037071982 | 0.029638029 | 0.032291607 | 0.032326677 |
| ENSG00000138326 | 0.013700438 | 0.023401509 | 0.023558501 | 0.015092526 |
| ENSG00000111817 | 0.029862413 | 0.032195676 | 0.030940748 | 0.028596514 |
| ENSG00000189319 | 0.045134939 | 0.037795222 | 0.037850808 | 0.040803842 |
| ENSG00000131738 | 0.015746981 | 0.023932291 | 0.024517763 | 0.015429224 |
| ENSG00000157823 | 0.01951272  | 0.028870979 | 0.026863108 | 0.018674796 |
| ENSG00000136160 | 0.018753286 | 0.025266377 | 0.025149286 | 0.015809833 |
| ENSG00000132640 | 0.016246026 | 0.025127018 | 0.025017017 | 0.017784185 |
| ENSG00000128789 | 0.019646994 | 0.02605785  | 0.027873093 | 0.019207057 |
| ENSG00000176165 | 0.123209291 | 0.025806611 | 0.061591804 | 0.033910776 |
| ENSG00000109132 | 0.015794687 | 0.024466627 | 0.024952709 | 0.014588428 |
| ENSG00000176945 | 0.035885451 | 0.03956692  | 0.037731205 | 0.040324882 |
| ENSG00000161992 | 0.014315422 | 0.025058327 | 0.024279316 | 0.015513678 |
| ENSG00000148331 | 0.016345221 | 0.026130011 | 0.026253355 | 0.017656804 |
| ENSG00000075151 | 0.032212314 | 0.037367386 | 0.035400186 | 0.02956546  |
| ENSG00000112697 | 0.032299181 | 0.035330334 | 0.03516809  | 0.026583408 |
| ENSG00000165804 | 0.029356459 | 0.032539966 | 0.026413832 | 0.024843169 |
| ENSG00000176236 | 0.015847992 | 0.025029167 | 0.025277106 | 0.015749596 |
| ENSG00000197905 | 0.146407078 | 0.119212344 | 0.10250148  | 0.112924044 |
| ENSG00000132561 | 0.019347912 | 0.024314831 | 0.025105084 | 0.017161711 |
| ENSG00000101745 | 0.033549945 | 0.034694594 | 0.034612438 | 0.032444487 |
| ENSG00000056050 | 0.038178583 | 0.036880133 | 0.032312938 | 0.032726234 |
| ENSG00000103995 | 0.045851183 | 0.047469837 | 0.032438432 | 0.038260869 |
| ENSG00000075142 | 0.032625304 | 0.036230549 | 0.030644286 | 0.030710877 |
| ENSG00000148219 | 0.016055441 | 0.025414212 | 0.024970134 | 0.016030154 |
| ENSG00000228716 | 0.053303224 | 0.045683905 | 0.036564817 | 0.047216107 |
| ENSG00000176177 | 0.047719027 | 0.085865094 | 0.029161436 | 0.047445523 |
| ENSG00000104660 | 0.032671218 | 0.035312032 | 0.034067993 | 0.03013433  |
| ENSG00000100307 | 0.039901724 | 0.037178259 | 0.04350922  | 0.038150559 |
| ENSG00000028203 | 0.029857196 | 0.031830261 | 0.040833603 | 0.0242766   |
| ENSG00000179262 | 0.022776285 | 0.026225222 | 0.028334382 | 0.022082887 |
| ENSG00000204463 | 0.02097008  | 0.026672872 | 0.032756664 | 0.022194599 |
| ENSG00000081148 | 0.015283914 | 0.025911141 | 0.024391591 | 0.014824243 |
| ENSG00000146648 | 0.018117391 | 0.027272126 | 0.025683284 | 0.020227918 |
| ENSG00000127530 | 0.015700139 | 0.025690969 | 0.025123159 | 0.015904424 |
| ENSG00000161999 | 0.022601897 | 0.033446023 | 0.032598867 | 0.027113426 |
| ENSG00000176393 | 0.034103265 | 0.040265102 | 0.031119234 | 0.028592905 |
| ENSG00000100867 | 0.028155838 | 0.027244648 | 0.027473853 | 0.018414917 |
| ENSG00000164404 | 0.016669229 | 0.025928581 | 0.025356071 | 0.015597635 |
| ENSG00000145879 | 0.014897292 | 0.024514376 | 0.02461941  | 0.014445779 |

|                 |             |             |             |             |
|-----------------|-------------|-------------|-------------|-------------|
| ENSG00000113851 | 0.029547971 | 0.038009751 | 0.034583297 | 0.025972933 |
| ENSG00000204195 | 0.016859822 | 0.025340504 | 0.025227335 | 0.015764172 |
| ENSG00000119946 | 0.01938112  | 0.026726909 | 0.026137423 | 0.017973648 |
| ENSG00000132386 | 0.034778765 | 0.037411487 | 0.040594949 | 0.025160245 |
| ENSG00000163479 | 0.021993923 | 0.028490958 | 0.030763622 | 0.020098164 |
| ENSG00000142694 | 0.053398008 | 0.05300575  | 0.043869466 | 0.054915407 |
| ENSG00000142748 | 0.016566819 | 0.025510122 | 0.024792555 | 0.015960272 |
| ENSG00000183808 | 0.029818696 | 0.034559032 | 0.036514541 | 0.026205522 |
| ENSG00000113212 | 0.018906823 | 0.027489563 | 0.028079404 | 0.01923142  |
| ENSG00000120054 | 0.018269286 | 0.025810452 | 0.026145563 | 0.017975327 |
| ENSG00000035720 | 0.050773793 | 0.051425691 | 0.041361329 | 0.038800265 |
| ENSG00000181991 | 0.027475239 | 0.031839752 | 0.030294353 | 0.026096593 |
| ENSG00000141385 | 0.02487716  | 0.030942699 | 0.031994895 | 0.023688381 |
| ENSG00000177272 | 0.027027322 | 0.030194588 | 0.030936209 | 0.029212726 |
| ENSG00000171532 | 0.030494043 | 0.028263217 | 0.026976809 | 0.018302944 |
| ENSG00000063601 | 0.025849114 | 0.034036495 | 0.026681324 | 0.035771092 |
| ENSG00000124762 | 0.032635214 | 0.032223151 | 0.033055058 | 0.026138576 |
| ENSG00000144591 | 0.032056298 | 0.046354318 | 0.041823511 | 0.034225141 |
| ENSG00000196781 | 0.050084669 | 0.037122636 | 0.039928793 | 0.057672588 |
| ENSG00000135439 | 0.017813786 | 0.026782946 | 0.024900603 | 0.019022815 |
| ENSG00000188176 | 0.015540491 | 0.026229759 | 0.025936551 | 0.016856151 |
| ENSG00000151229 | 0.034656822 | 0.039300316 | 0.032542645 | 0.0340526   |
| ENSG00000156502 | 0.03000155  | 0.035813442 | 0.03194088  | 0.027453454 |
| ENSG00000109320 | 0.023416212 | 0.030148157 | 0.029584451 | 0.022336034 |
| ENSG00000173930 | 0.018212671 | 0.025818401 | 0.025648146 | 0.017946889 |
| ENSG00000105672 | 0.030811405 | 0.03234028  | 0.031197236 | 0.022729782 |
| ENSG00000143178 | 0.018826212 | 0.029428473 | 0.027284671 | 0.02307622  |
| ENSG00000180767 | 0.016804573 | 0.025680267 | 0.024418985 | 0.015065181 |
| ENSG00000185053 | 0.016002288 | 0.02577771  | 0.02457005  | 0.016077272 |
| ENSG00000011376 | 0.030304395 | 0.035360357 | 0.032114399 | 0.026938988 |
| ENSG00000120471 | 0.016072933 | 0.026023256 | 0.025659748 | 0.015225004 |
| ENSG00000241839 | 0.0282452   | 0.033743426 | 0.040047982 | 0.031250859 |
| ENSG00000198464 | 0.046786626 | 0.045730101 | 0.04368048  | 0.048071557 |
| ENSG00000146094 | 0.038011269 | 0.036836574 | 0.037614465 | 0.036921537 |
| ENSG00000089356 | 0.01549802  | 0.025071491 | 0.025349886 | 0.015643148 |
| ENSG00000159640 | 0.016231969 | 0.026668616 | 0.025202735 | 0.016547646 |
| ENSG00000103174 | 0.022686967 | 0.029449134 | 0.029785876 | 0.028569626 |
| ENSG00000100890 | 0.016784167 | 0.024758082 | 0.025978396 | 0.015994855 |
| ENSG00000182909 | 0.023798045 | 0.030216835 | 0.028083481 | 0.026878618 |
| ENSG00000178462 | 0.017542847 | 0.027522942 | 0.025835049 | 0.017642436 |
| ENSG00000152467 | 0.016181085 | 0.024287097 | 0.025538793 | 0.016311563 |
| ENSG00000080854 | 0.017690898 | 0.025718576 | 0.027035684 | 0.017427402 |
| ENSG00000158006 | 0.029766838 | 0.03236671  | 0.033343352 | 0.032726291 |
| ENSG00000148290 | 0.029465221 | 0.033008822 | 0.034779709 | 0.025857509 |
| ENSG00000128203 | 0.037215166 | 0.04438978  | 0.043020675 | 0.030731907 |
| ENSG00000163082 | 0.046016663 | 0.042466772 | 0.043377378 | 0.042732473 |
| ENSG00000102904 | 0.016823949 | 0.025181774 | 0.02454173  | 0.015126384 |
| ENSG00000171016 | 0.020040371 | 0.025481845 | 0.025079605 | 0.018557888 |
| ENSG00000142675 | 0.085302806 | 0.077151197 | 0.075012555 | 0.080046496 |
| ENSG00000101306 | 0.01622831  | 0.025250588 | 0.025164861 | 0.016224072 |
| ENSG00000029363 | 0.030154507 | 0.032003162 | 0.036195788 | 0.037413733 |
| ENSG00000154001 | 0.027171747 | 0.032878784 | 0.031289891 | 0.020688055 |
| ENSG00000130544 | 0.029230267 | 0.037353494 | 0.035922211 | 0.02622375  |
| ENSG00000100632 | 0.022606018 | 0.029114376 | 0.026987681 | 0.019422341 |

|                 |             |             |             |             |
|-----------------|-------------|-------------|-------------|-------------|
| ENSG0000083093  | 0.023720565 | 0.031373186 | 0.030682047 | 0.019741912 |
| ENSG00000151365 | 0.016512252 | 0.024503432 | 0.024506581 | 0.015023185 |
| ENSG00000183801 | 0.015655669 | 0.02522007  | 0.024801141 | 0.016642734 |
| ENSG00000186493 | 0.017001322 | 0.025170228 | 0.026339204 | 0.016000197 |
| ENSG00000212933 | 0.018230869 | 0.026995178 | 0.027529283 | 0.018898601 |
| ENSG00000112877 | 0.02859956  | 0.032607073 | 0.028673187 | 0.023184401 |
| ENSG00000024526 | 0.046071232 | 0.035432236 | 0.035547628 | 0.031047565 |
| ENSG00000144040 | 0.03873443  | 0.03114851  | 0.030438711 | 0.028047898 |
| ENSG00000155754 | 0.015696743 | 0.02413029  | 0.02433742  | 0.015809421 |
| ENSG00000113396 | 0.017116877 | 0.025761966 | 0.025824497 | 0.016931303 |
| ENSG00000146476 | 0.033579483 | 0.042946876 | 0.033502916 | 0.024502662 |
| ENSG00000133460 | 0.019989133 | 0.026027779 | 0.024456008 | 0.018160312 |
| ENSG00000038427 | 0.098230407 | 0.077881367 | 0.071957756 | 0.084460917 |
| ENSG00000110011 | 0.024029362 | 0.029848496 | 0.032306213 | 0.02849339  |
| ENSG00000173389 | 0.018312884 | 0.02871523  | 0.026237101 | 0.018130738 |
| ENSG00000165862 | 0.016174118 | 0.02476999  | 0.027218441 | 0.01566825  |
| ENSG00000146757 | 0.048157849 | 0.053243891 | 0.042708035 | 0.064186143 |
| ENSG00000185523 | 0.021357882 | 0.026273493 | 0.024876373 | 0.017619572 |
| ENSG00000100290 | 0.082861299 | 0.070065252 | 0.074636469 | 0.093461868 |
| ENSG00000108826 | 0.049405016 | 0.037294483 | 0.04760093  | 0.037583305 |
| ENSG00000089472 | 0.015554526 | 0.02472605  | 0.025006095 | 0.014699642 |
| ENSG00000243232 | 0.019406089 | 0.027277003 | 0.029585658 | 0.016615688 |
| ENSG00000102007 | 0.049885794 | 0.035029037 | 0.038521808 | 0.040551722 |
| ENSG00000180090 | 0.017378437 | 0.025315568 | 0.02611322  | 0.014869705 |
| ENSG00000103494 | 0.020831109 | 0.029337782 | 0.0270652   | 0.017601323 |
| ENSG00000130254 | 0.026088595 | 0.030443615 | 0.035931689 | 0.023406304 |
| ENSG00000108830 | 0.014507616 | 0.025525388 | 0.024833235 | 0.014684912 |
| ENSG00000095970 | 0.015305932 | 0.025068235 | 0.02497988  | 0.014747819 |
| ENSG00000140279 | 0.016025052 | 0.026211569 | 0.025569453 | 0.016772984 |
| ENSG00000138039 | 0.022075936 | 0.031095544 | 0.025546215 | 0.020632393 |
| ENSG00000197837 | 0.0345969   | 0.030906092 | 0.034224699 | 0.036289248 |
| ENSG00000169282 | 0.014900705 | 0.02485227  | 0.024385786 | 0.016020782 |
| ENSG00000130244 | 0.040139838 | 0.031209039 | 0.033860825 | 0.031290967 |
| ENSG00000116668 | 0.034516337 | 0.034290371 | 0.031361074 | 0.030335985 |
| ENSG00000203784 | 0.015894418 | 0.024351778 | 0.024585754 | 0.01518423  |
| ENSG00000112333 | 0.018376493 | 0.026540792 | 0.029015358 | 0.01582858  |
| ENSG00000141577 | 0.020042379 | 0.025878998 | 0.025275047 | 0.01881297  |
| ENSG00000159496 | 0.071256843 | 0.040632141 | 0.051227858 | 0.065904681 |
| ENSG00000075131 | 0.039913454 | 0.039011231 | 0.036292912 | 0.04110648  |
| ENSG00000012822 | 0.032185865 | 0.03152621  | 0.035579872 | 0.036774851 |
| ENSG00000174374 | 0.028356797 | 0.032164844 | 0.033412903 | 0.026140313 |
| ENSG00000178952 | 0.024749628 | 0.029598538 | 0.026662772 | 0.023376521 |
| ENSG00000111049 | 0.01516249  | 0.025201438 | 0.025962338 | 0.015208444 |
| ENSG00000120910 | 0.032783926 | 0.033411742 | 0.034582075 | 0.025466104 |
| ENSG00000137409 | 0.0209724   | 0.029107148 | 0.028602407 | 0.019230409 |
| ENSG00000008869 | 0.038433636 | 0.043976446 | 0.034284975 | 0.033629472 |
| ENSG00000105427 | 0.023391147 | 0.030075186 | 0.026639909 | 0.031527697 |
| ENSG00000068878 | 0.020862527 | 0.030241964 | 0.029789528 | 0.020777398 |
| ENSG00000136371 | 0.037765275 | 0.045419315 | 0.036439847 | 0.038673435 |
| ENSG00000160767 | 0.026984396 | 0.028132506 | 0.030011097 | 0.025180131 |
| ENSG00000146700 | 0.019049625 | 0.028527084 | 0.031373108 | 0.017831423 |
| ENSG00000185624 | 0.031103708 | 0.028466761 | 0.0357226   | 0.029589405 |
| ENSG00000006210 | 0.041021329 | 0.032238    | 0.038428507 | 0.01890812  |
| ENSG00000138030 | 0.022430508 | 0.028538174 | 0.031833287 | 0.018408749 |

|                 |             |             |             |             |
|-----------------|-------------|-------------|-------------|-------------|
| ENSG00000110934 | 0.038824024 | 0.039712441 | 0.042344324 | 0.03889189  |
| ENSG00000124641 | 0.042353094 | 0.040555976 | 0.032849657 | 0.02779126  |
| ENSG00000109189 | 0.033063615 | 0.038974936 | 0.034888685 | 0.025673352 |
| ENSG00000109046 | 0.030492392 | 0.030275447 | 0.029291618 | 0.028550227 |
| ENSG00000169032 | 0.025229128 | 0.030691957 | 0.030184531 | 0.024826315 |
| ENSG00000137265 | 0.023406221 | 0.027736274 | 0.028923506 | 0.020542028 |
| ENSG00000070985 | 0.015902456 | 0.026724633 | 0.024386463 | 0.016053357 |
| ENSG00000100982 | 0.027428334 | 0.028834834 | 0.03388983  | 0.025070991 |
| ENSG00000110435 | 0.02724122  | 0.030623648 | 0.031366107 | 0.025877194 |
| ENSG00000115758 | 0.037855695 | 0.033420199 | 0.031502077 | 0.031010789 |
| ENSG00000243279 | 0.036529966 | 0.03141467  | 0.029306242 | 0.031079087 |
| ENSG00000182197 | 0.042677143 | 0.040434873 | 0.043967225 | 0.035924644 |
| ENSG00000117632 | 0.015742195 | 0.025125918 | 0.025943221 | 0.016650856 |
| ENSG00000138641 | 0.030783823 | 0.038187372 | 0.032770791 | 0.030743962 |
| ENSG00000105479 | 0.016382523 | 0.024058015 | 0.024343121 | 0.016798072 |
| ENSG00000179172 | 0.027606307 | 0.035632536 | 0.034083719 | 0.036035508 |
| ENSG00000198822 | 0.058343854 | 0.04298435  | 0.04107565  | 0.037522026 |
| ENSG00000135250 | 0.022263611 | 0.03145936  | 0.030183264 | 0.023753173 |
| ENSG00000110245 | 0.016011477 | 0.025174918 | 0.024649286 | 0.016118821 |
| ENSG00000122729 | 0.041951381 | 0.048463572 | 0.040173029 | 0.036817569 |
| ENSG00000184032 | 0.015104254 | 0.023634969 | 0.024078144 | 0.01439412  |
| ENSG00000169018 | 0.021950174 | 0.027044773 | 0.028109075 | 0.01818562  |
| ENSG00000152332 | 0.029288458 | 0.036764245 | 0.052880411 | 0.032083878 |
| ENSG00000163394 | 0.015671879 | 0.0250803   | 0.024685562 | 0.015301065 |
| ENSG00000160310 | 0.031683539 | 0.038124688 | 0.035518402 | 0.0333975   |
| ENSG00000129244 | 0.040322004 | 0.029522452 | 0.033026091 | 0.030947288 |
| ENSG00000121297 | 0.016609893 | 0.024878789 | 0.024746795 | 0.015166249 |
| ENSG00000176476 | 0.025788191 | 0.029379046 | 0.027394921 | 0.024385518 |
| ENSG00000080644 | 0.018223185 | 0.026151839 | 0.027984744 | 0.015227419 |
| ENSG00000176679 | 0.015716195 | 0.026356841 | 0.026358911 | 0.016798854 |
| ENSG00000101210 | 0.153478512 | 0.127188423 | 0.099423895 | 0.131062527 |
| ENSG00000089101 | 0.015712825 | 0.025133922 | 0.024877829 | 0.014411088 |
| ENSG00000169764 | 0.024829497 | 0.033087065 | 0.030419243 | 0.019719767 |
| ENSG00000129465 | 0.024628378 | 0.028645805 | 0.028968915 | 0.023722556 |
| ENSG00000198331 | 0.04424222  | 0.044401412 | 0.047055478 | 0.040983741 |
| ENSG00000124787 | 0.044278597 | 0.034747601 | 0.038681358 | 0.043473002 |
| ENSG00000163710 | 0.033174643 | 0.030029721 | 0.02706776  | 0.026408857 |
| ENSG00000160213 | 0.034773732 | 0.036528861 | 0.03890627  | 0.031572364 |
| ENSG00000016602 | 0.015623597 | 0.025737914 | 0.025587363 | 0.01606847  |
| ENSG00000130598 | 0.016214675 | 0.026374513 | 0.025019465 | 0.016207391 |
| ENSG00000175782 | 0.03142141  | 0.036924669 | 0.037384073 | 0.032191166 |
| ENSG00000176198 | 0.016829104 | 0.02461686  | 0.024879992 | 0.015851535 |
| ENSG00000011052 | 0.020837447 | 0.02734305  | 0.027053578 | 0.019964799 |
| ENSG00000166762 | 0.029929801 | 0.030251352 | 0.03359215  | 0.026515133 |
| ENSG00000164938 | 0.069849411 | 0.059472613 | 0.055759435 | 0.055917991 |
| ENSG00000181856 | 0.0152801   | 0.023776641 | 0.024781052 | 0.015118889 |
| ENSG00000183722 | 0.080600738 | 0.041759571 | 0.04928359  | 0.056503751 |
| ENSG00000180861 | 0.015828421 | 0.024386044 | 0.024898075 | 0.01488225  |
| ENSG00000157193 | 0.015508568 | 0.024420742 | 0.025124125 | 0.015117777 |
| ENSG00000070018 | 0.016460157 | 0.026311435 | 0.026162052 | 0.01766893  |
| ENSG00000198914 | 0.015337063 | 0.025369962 | 0.025491785 | 0.016716725 |
| ENSG00000167283 | 0.03166661  | 0.031664459 | 0.033627711 | 0.030253967 |
| ENSG00000175224 | 0.026184755 | 0.030385783 | 0.039814711 | 0.022397624 |
| ENSG00000172469 | 0.045797212 | 0.043141751 | 0.037990373 | 0.040018103 |



|                 |             |             |             |             |
|-----------------|-------------|-------------|-------------|-------------|
| ENSG00000104904 | 0.016433508 | 0.025174292 | 0.025245218 | 0.014669779 |
| ENSG00000102924 | 0.018169908 | 0.027000472 | 0.026234923 | 0.017779314 |
| ENSG00000132017 | 0.030720656 | 0.030227553 | 0.03454125  | 0.030308437 |
| ENSG00000145192 | 0.014505357 | 0.024690595 | 0.025159165 | 0.016457821 |
| ENSG00000109881 | 0.018708258 | 0.025768735 | 0.026214183 | 0.017804262 |
| ENSG00000165457 | 0.045251107 | 0.040035243 | 0.040038666 | 0.03971136  |
| ENSG00000188487 | 0.016707441 | 0.025187111 | 0.025812308 | 0.016248453 |
| ENSG00000160439 | 0.031572202 | 0.02940023  | 0.036889287 | 0.023010852 |
| ENSG00000023445 | 0.043122222 | 0.037396148 | 0.03598301  | 0.041238381 |
| ENSG00000134597 | 0.017274496 | 0.027857235 | 0.025282343 | 0.017352558 |
| ENSG00000213218 | 0.017584273 | 0.025111909 | 0.025300459 | 0.016380047 |
| ENSG00000185069 | 0.015945721 | 0.025351907 | 0.024583442 | 0.014587995 |
| ENSG00000185888 | 0.015375043 | 0.025753509 | 0.024342006 | 0.015405894 |
| ENSG00000198081 | 0.032607226 | 0.039925298 | 0.037155451 | 0.028332104 |
| ENSG00000064933 | 0.045847774 | 0.050031029 | 0.041229073 | 0.030619594 |
| ENSG00000126562 | 0.015367847 | 0.024915922 | 0.024255252 | 0.014631104 |
| ENSG00000182481 | 0.030914561 | 0.031840598 | 0.033126224 | 0.032972867 |
| ENSG00000139725 | 0.030236123 | 0.035072158 | 0.034012544 | 0.032112382 |
| ENSG00000107736 | 0.015809831 | 0.025647615 | 0.024405557 | 0.014670599 |
| ENSG00000148677 | 0.017091524 | 0.025150179 | 0.024373807 | 0.016083127 |
| ENSG00000133636 | 0.042932015 | 0.029890355 | 0.030107135 | 0.027024814 |
| ENSG00000181467 | 0.017195485 | 0.025019567 | 0.024653214 | 0.015887674 |
| ENSG00000159840 | 0.029869119 | 0.034105687 | 0.038602817 | 0.036995673 |
| ENSG00000083535 | 0.020116294 | 0.030180692 | 0.026605416 | 0.03322132  |
| ENSG00000116017 | 0.028932323 | 0.034150655 | 0.035911403 | 0.023363973 |
| ENSG00000187806 | 0.015322514 | 0.02523222  | 0.024585724 | 0.015057969 |
| ENSG00000105877 | 0.017181198 | 0.026613658 | 0.025743518 | 0.016693407 |
| ENSG00000196074 | 0.032124995 | 0.034935542 | 0.036157382 | 0.031215099 |
| ENSG00000158497 | 0.078251157 | 0.066265381 | 0.066491497 | 0.067637458 |
| ENSG00000125629 | 0.054557243 | 0.05228055  | 0.055398452 | 0.047973773 |
| ENSG00000099917 | 0.028367833 | 0.038057943 | 0.039204958 | 0.037601367 |
| ENSG00000181982 | 0.018791781 | 0.025420877 | 0.026412565 | 0.01707498  |
| ENSG00000168619 | 0.023167649 | 0.031522224 | 0.028966661 | 0.026619195 |
| ENSG00000115257 | 0.02533544  | 0.029947425 | 0.028361872 | 0.024845509 |
| ENSG00000144118 | 0.052378658 | 0.076515831 | 0.059396742 | 0.062128976 |
| ENSG00000101346 | 0.020008011 | 0.027501807 | 0.026179623 | 0.01566467  |
| ENSG00000145782 | 0.025879761 | 0.031125091 | 0.031548818 | 0.020663687 |
| ENSG00000132141 | 0.039852585 | 0.042737106 | 0.039416706 | 0.044496322 |
| ENSG00000101958 | 0.016227254 | 0.025065482 | 0.025458259 | 0.014709753 |
| ENSG00000129873 | 0.015110067 | 0.025184046 | 0.025418435 | 0.015517434 |
| ENSG00000175390 | 0.01648993  | 0.025537569 | 0.025136006 | 0.017131568 |
| ENSG00000134698 | 0.0221992   | 0.028468255 | 0.031494071 | 0.023127053 |
| ENSG00000186862 | 0.015330322 | 0.024417264 | 0.025244382 | 0.015379607 |
| ENSG00000164251 | 0.024521899 | 0.025797276 | 0.02472624  | 0.017242448 |
| ENSG00000090273 | 0.030025086 | 0.030914999 | 0.031383525 | 0.026269463 |
| ENSG00000060656 | 0.014255676 | 0.024837949 | 0.024848364 | 0.014819167 |
| ENSG00000136830 | 0.059750375 | 0.094949292 | 0.076253887 | 0.059621579 |
| ENSG00000088882 | 0.12879588  | 0.074092282 | 0.068613714 | 0.09592604  |
| ENSG00000057704 | 0.037581038 | 0.045396019 | 0.042782037 | 0.041477846 |
| ENSG00000188483 | 0.016341234 | 0.026434161 | 0.02607364  | 0.017738635 |
| ENSG00000161048 | 0.036189864 | 0.041437119 | 0.033174526 | 0.029098406 |
| ENSG00000156030 | 0.027727109 | 0.038551156 | 0.036237056 | 0.020843743 |
| ENSG00000002919 | 0.026242066 | 0.031540238 | 0.030730329 | 0.029218019 |
| ENSG00000146457 | 0.015505867 | 0.025416255 | 0.025737085 | 0.015635058 |

|                 |             |             |             |             |
|-----------------|-------------|-------------|-------------|-------------|
| ENSG00000188643 | 0.015296837 | 0.024724201 | 0.02452712  | 0.016460263 |
| ENSG00000162645 | 0.029094575 | 0.037741582 | 0.03414568  | 0.031217757 |
| ENSG00000188076 | 0.015383524 | 0.024981651 | 0.025761733 | 0.014194173 |
| ENSG00000197409 | 0.058998326 | 0.04922568  | 0.049271857 | 0.053140735 |
| ENSG00000086200 | 0.029912781 | 0.035985012 | 0.033986465 | 0.025110354 |
| ENSG00000145734 | 0.01592845  | 0.026278309 | 0.025762246 | 0.017043327 |
| ENSG00000116717 | 0.038902059 | 0.032533254 | 0.040116241 | 0.040189356 |
| ENSG00000171115 | 0.073903063 | 0.066672404 | 0.067280392 | 0.075235178 |
| ENSG00000196678 | 0.02213608  | 0.030326288 | 0.029342299 | 0.018591911 |
| ENSG00000175175 | 0.03407066  | 0.025083691 | 0.025796947 | 0.019484551 |
| ENSG00000174600 | 0.056125012 | 0.04433185  | 0.034665622 | 0.04557791  |
| ENSG00000113141 | 0.024658209 | 0.032405376 | 0.030327649 | 0.019186042 |
| ENSG00000118263 | 0.02025316  | 0.0282514   | 0.027589708 | 0.017858933 |
| ENSG00000067208 | 0.038505962 | 0.039229584 | 0.036014808 | 0.045848821 |
| ENSG00000151792 | 0.043733856 | 0.046590192 | 0.040862015 | 0.038773672 |
| ENSG00000118762 | 0.040443363 | 0.041941969 | 0.042631794 | 0.036852907 |
| ENSG00000072501 | 0.022545985 | 0.028928576 | 0.030007716 | 0.019058044 |
| ENSG00000167526 | 0.032357544 | 0.036754204 | 0.032083825 | 0.031112226 |
| ENSG00000107443 | 0.021489976 | 0.027973637 | 0.028307386 | 0.022499756 |
| ENSG00000164610 | 0.028149079 | 0.030801433 | 0.030238763 | 0.023558001 |
| ENSG00000116898 | 0.019264739 | 0.0268091   | 0.025895065 | 0.017196589 |
| ENSG00000196358 | 0.018023994 | 0.027118394 | 0.027571634 | 0.021080756 |
| ENSG00000177302 | 0.021124918 | 0.027918198 | 0.031366198 | 0.021902764 |
| ENSG00000155980 | 0.016221498 | 0.024561462 | 0.025198624 | 0.015702868 |
| ENSG00000186113 | 0.016694074 | 0.025730556 | 0.025592919 | 0.015333953 |
| ENSG00000105976 | 0.015860227 | 0.024401259 | 0.025259642 | 0.015125915 |
| ENSG00000065135 | 0.035913526 | 0.037836088 | 0.033115566 | 0.03587597  |
| ENSG00000102109 | 0.02408058  | 0.025890038 | 0.025066429 | 0.017055823 |
| ENSG00000105609 | 0.017371565 | 0.025574804 | 0.027311836 | 0.015797722 |
| ENSG00000145425 | 0.01332499  | 0.023713021 | 0.023619595 | 0.014522328 |
| ENSG00000108688 | 0.017788759 | 0.025523472 | 0.027500983 | 0.017524371 |
| ENSG00000113732 | 0.017610031 | 0.028065817 | 0.027737179 | 0.016460818 |
| ENSG00000131389 | 0.016363565 | 0.02615194  | 0.024687383 | 0.016057355 |
| ENSG00000170871 | 0.03258974  | 0.029804489 | 0.034518877 | 0.032840797 |
| ENSG00000171863 | 0.014536994 | 0.023769201 | 0.024030865 | 0.01575267  |
| ENSG00000187939 | 0.017752695 | 0.024819875 | 0.02637407  | 0.015802026 |
| ENSG00000144214 | 0.020537165 | 0.026856875 | 0.029427154 | 0.019950787 |
| ENSG00000134070 | 0.018951705 | 0.027730902 | 0.026400121 | 0.02082864  |
| ENSG00000124302 | 0.019830365 | 0.032603567 | 0.031416201 | 0.021121285 |
| ENSG00000144381 | 0.015401835 | 0.025346575 | 0.024493758 | 0.015212446 |
| ENSG00000104679 | 0.027182098 | 0.033876487 | 0.041347459 | 0.023393106 |
| ENSG00000088325 | 0.04627831  | 0.036985206 | 0.037111884 | 0.031321899 |
| ENSG00000178928 | 0.016043243 | 0.026294344 | 0.024723315 | 0.015427787 |
| ENSG00000134987 | 0.029970542 | 0.031596036 | 0.029849588 | 0.035392763 |
| ENSG00000054654 | 0.014378781 | 0.025119656 | 0.025286333 | 0.015828721 |
| ENSG00000141564 | 0.025917063 | 0.035109615 | 0.037917759 | 0.029874064 |
| ENSG00000137563 | 0.039817424 | 0.033336129 | 0.031657496 | 0.031172697 |
| ENSG00000185829 | 0.030704373 | 0.027629718 | 0.02706115  | 0.018978557 |
| ENSG00000180287 | 0.016652204 | 0.025405222 | 0.025523651 | 0.014831107 |
| ENSG00000125454 | 0.032988844 | 0.034020543 | 0.036038591 | 0.027918622 |
| ENSG00000120160 | 0.015509247 | 0.02501599  | 0.024940223 | 0.015370133 |
| ENSG00000141447 | 0.014502917 | 0.025073957 | 0.024925985 | 0.015521729 |
| ENSG00000035115 | 0.037650344 | 0.040960135 | 0.038845228 | 0.030776783 |
| ENSG00000160233 | 0.015189557 | 0.024943021 | 0.02482851  | 0.014032766 |

|                 |             |             |             |             |
|-----------------|-------------|-------------|-------------|-------------|
| ENSG00000119927 | 0.0261136   | 0.028738162 | 0.031638325 | 0.020246684 |
| ENSG00000118193 | 0.049509764 | 0.040734783 | 0.037111647 | 0.037715001 |
| ENSG00000157895 | 0.025276708 | 0.029691284 | 0.032465525 | 0.024069279 |
| ENSG00000164889 | 0.025797233 | 0.032413589 | 0.032959953 | 0.028741501 |
| ENSG00000170498 | 0.015547486 | 0.025214345 | 0.025107057 | 0.016016263 |
| ENSG00000156697 | 0.028624964 | 0.032118647 | 0.036346485 | 0.032122379 |
| ENSG00000133195 | 0.035022776 | 0.035577828 | 0.030803291 | 0.028990548 |
| ENSG00000173171 | 0.023145963 | 0.027079474 | 0.030992866 | 0.022365226 |
| ENSG00000113645 | 0.057037852 | 0.055010857 | 0.057552957 | 0.049923891 |
| ENSG00000196562 | 0.087606513 | 0.062487213 | 0.063384183 | 0.061427276 |
| ENSG00000213658 | 0.059406028 | 0.050336368 | 0.050109901 | 0.050613284 |
| ENSG00000205560 | 0.041477887 | 0.050222998 | 0.042678687 | 0.039173697 |
| ENSG00000188582 | 0.016184864 | 0.026082857 | 0.024998041 | 0.015743874 |
| ENSG00000143515 | 0.021049527 | 0.02823156  | 0.027744803 | 0.020362449 |
| ENSG00000143761 | 0.021145808 | 0.02694497  | 0.02824696  | 0.02003463  |
| ENSG00000070404 | 0.054413923 | 0.040782573 | 0.038848873 | 0.056260138 |
| ENSG00000179021 | 0.029233502 | 0.035300858 | 0.039042693 | 0.024876193 |
| ENSG00000113966 | 0.016846412 | 0.024707666 | 0.026333633 | 0.016259446 |
| ENSG00000118855 | 0.035234064 | 0.035368858 | 0.030722207 | 0.030144757 |
| ENSG00000105369 | 0.037695371 | 0.035483554 | 0.038586426 | 0.035922172 |
| ENSG00000107099 | 0.035937511 | 0.044006085 | 0.031699125 | 0.02889716  |
| ENSG00000152443 | 0.029857958 | 0.03954695  | 0.037844561 | 0.032696808 |
| ENSG00000104154 | 0.015187913 | 0.025067219 | 0.025105826 | 0.014950284 |
| ENSG00000239732 | 0.014976589 | 0.025141294 | 0.024804915 | 0.015188309 |
| ENSG00000015592 | 0.019448935 | 0.02492333  | 0.025514553 | 0.015178747 |
| ENSG00000116747 | 0.027235824 | 0.030433794 | 0.031597392 | 0.021786049 |
| ENSG00000144224 | 0.020688617 | 0.027719314 | 0.027500687 | 0.020791087 |
| ENSG00000166046 | 0.01856019  | 0.029035845 | 0.026420358 | 0.019511696 |
| ENSG00000108264 | 0.029661933 | 0.029330398 | 0.036067536 | 0.033191919 |
| ENSG00000188269 | 0.017404021 | 0.024683422 | 0.02577883  | 0.015830279 |
| ENSG00000134825 | 0.024234297 | 0.030289741 | 0.032699943 | 0.025950575 |
| ENSG00000066422 | 0.030507567 | 0.035377467 | 0.030673618 | 0.036140095 |
| ENSG00000198681 | 0.024351864 | 0.026245321 | 0.025674985 | 0.016243258 |
| ENSG00000126903 | 0.029422549 | 0.032456141 | 0.040029797 | 0.023743257 |
| ENSG00000154143 | 0.015970044 | 0.02576693  | 0.025424724 | 0.014858275 |
| ENSG00000168056 | 0.027211478 | 0.030645662 | 0.039375282 | 0.022862924 |
| ENSG00000105793 | 0.034862829 | 0.032289671 | 0.040846267 | 0.037203874 |
| ENSG00000196329 | 0.131698218 | 0.103643774 | 0.095284756 | 0.117860348 |
| ENSG00000169131 | 0.043104582 | 0.042414431 | 0.03963625  | 0.032393877 |
| ENSG00000089682 | 0.029796378 | 0.032230468 | 0.030439717 | 0.022276133 |
| ENSG00000087589 | 0.01582483  | 0.025298541 | 0.024695854 | 0.015320419 |
| ENSG00000174132 | 0.028015883 | 0.033865709 | 0.031385078 | 0.024430289 |
| ENSG00000172794 | 0.082026823 | 0.065543327 | 0.059014916 | 0.07322027  |
| ENSG00000069998 | 0.042521323 | 0.038603198 | 0.035851422 | 0.034205616 |
| ENSG00000187821 | 0.01455395  | 0.024791168 | 0.024855988 | 0.014373975 |
| ENSG00000171509 | 0.015269937 | 0.024643067 | 0.024772538 | 0.015358165 |
| ENSG00000112290 | 0.062161829 | 0.070656918 | 0.058360559 | 0.077115988 |
| ENSG00000134202 | 0.03475589  | 0.035395506 | 0.031183368 | 0.035721326 |
| ENSG00000164379 | 0.015515106 | 0.025830382 | 0.024651381 | 0.014653795 |
| ENSG00000100985 | 0.040719713 | 0.033103428 | 0.033989196 | 0.059535638 |
| ENSG00000149575 | 0.01466978  | 0.025140564 | 0.024904381 | 0.014415304 |
| ENSG00000179331 | 0.015545546 | 0.024923925 | 0.024281776 | 0.016823654 |
| ENSG00000009765 | 0.015792444 | 0.025268161 | 0.025650852 | 0.015959076 |
| ENSG00000122140 | 0.025157018 | 0.028331371 | 0.034249113 | 0.0238001   |

|                 |             |             |             |             |
|-----------------|-------------|-------------|-------------|-------------|
| ENSG00000141469 | 0.024319967 | 0.030750294 | 0.028955277 | 0.023746834 |
| ENSG00000078018 | 0.016027538 | 0.025019312 | 0.023936281 | 0.0146636   |
| ENSG00000092853 | 0.031259954 | 0.032993458 | 0.026708623 | 0.021115801 |
| ENSG00000100558 | 0.01589597  | 0.025557054 | 0.025319239 | 0.01590476  |
| ENSG00000164073 | 0.03249762  | 0.034937682 | 0.039429477 | 0.026172883 |
| ENSG00000161956 | 0.023142663 | 0.030791959 | 0.031378503 | 0.024488001 |
| ENSG00000188778 | 0.016429897 | 0.02574303  | 0.024813275 | 0.01554273  |
| ENSG00000178761 | 0.026323191 | 0.036106939 | 0.035988223 | 0.026496111 |
| ENSG00000178732 | 0.014833756 | 0.024327382 | 0.024293564 | 0.014686145 |
| ENSG00000198589 | 0.026014107 | 0.033340325 | 0.031788729 | 0.022031527 |
| ENSG00000106028 | 0.020589034 | 0.026422441 | 0.027533025 | 0.02134622  |
| ENSG00000138821 | 0.035224154 | 0.042939557 | 0.036715406 | 0.030017413 |
| ENSG00000036448 | 0.062331115 | 0.067178817 | 0.051059382 | 0.061693054 |
| ENSG00000111886 | 0.015756658 | 0.025117283 | 0.025359247 | 0.015075429 |
| ENSG00000178295 | 0.032589452 | 0.032313513 | 0.030420828 | 0.032049658 |
| ENSG00000163536 | 0.04411412  | 0.041702635 | 0.0362893   | 0.034345611 |
| ENSG00000172943 | 0.019570744 | 0.026394065 | 0.027186898 | 0.016591124 |
| ENSG00000197272 | 0.016736424 | 0.023939672 | 0.024641985 | 0.01607997  |
| ENSG00000114786 | 0.032810905 | 0.031706591 | 0.030712012 | 0.025367733 |
| ENSG00000138594 | 0.024636989 | 0.031314139 | 0.030204988 | 0.021464652 |
| ENSG00000174485 | 0.02996501  | 0.034229531 | 0.031822694 | 0.026202096 |
| ENSG00000116213 | 0.033078929 | 0.033199523 | 0.034704686 | 0.031161603 |
| ENSG00000095380 | 0.037292296 | 0.03216849  | 0.032767134 | 0.028832013 |
| ENSG00000119915 | 0.014723492 | 0.024198004 | 0.025715048 | 0.01495461  |
| ENSG00000174963 | 0.018470244 | 0.024525496 | 0.028220579 | 0.018403859 |
| ENSG00000119684 | 0.016729381 | 0.02621197  | 0.026123269 | 0.017070284 |
| ENSG00000151575 | 0.062200458 | 0.085780988 | 0.056462113 | 0.064544033 |
| ENSG00000128245 | 0.02890858  | 0.031883245 | 0.030588347 | 0.026517186 |
| ENSG00000170367 | 0.014099057 | 0.024837851 | 0.025149407 | 0.014051224 |
| ENSG00000170903 | 0.030858123 | 0.036257615 | 0.03568956  | 0.030363844 |
| ENSG00000159182 | 0.02662446  | 0.024534193 | 0.024558337 | 0.015174344 |
| ENSG00000185046 | 0.016365257 | 0.024782242 | 0.025241533 | 0.01584637  |
| ENSG00000079435 | 0.032039131 | 0.035954756 | 0.030596365 | 0.030810884 |
| ENSG00000130487 | 0.017918375 | 0.026573556 | 0.025868776 | 0.017431563 |
| ENSG00000131148 | 0.032543739 | 0.044027317 | 0.044162335 | 0.035249895 |
| ENSG00000102302 | 0.016792555 | 0.025783462 | 0.024883633 | 0.016445115 |
| ENSG00000166091 | 0.016899833 | 0.024200509 | 0.02689904  | 0.015734777 |
| ENSG00000167930 | 0.029115206 | 0.041086773 | 0.039018541 | 0.034334159 |
| ENSG00000234616 | 0.021088917 | 0.028775523 | 0.029382242 | 0.021087001 |
| ENSG00000122420 | 0.015557629 | 0.024977533 | 0.025176023 | 0.014854736 |
| ENSG00000243024 | 0.033500238 | 0.033186441 | 0.031700667 | 0.024149718 |
| ENSG00000078596 | 0.051495477 | 0.039951973 | 0.045357078 | 0.046172417 |
| ENSG00000120049 | 0.016944343 | 0.02531699  | 0.027248781 | 0.015982431 |
| ENSG00000253910 | 0.016930969 | 0.025427093 | 0.025587397 | 0.016667756 |
| ENSG00000013588 | 0.056492386 | 0.065190363 | 0.045179909 | 0.059148627 |
| ENSG00000129990 | 0.01633265  | 0.024881672 | 0.025488842 | 0.016857416 |
| ENSG00000244754 | 0.044493331 | 0.04550025  | 0.045964857 | 0.036523102 |
| ENSG00000105738 | 0.018261506 | 0.026615191 | 0.026981561 | 0.021747381 |
| ENSG00000215612 | 0.015489102 | 0.025009386 | 0.024980427 | 0.015212966 |
| ENSG00000170927 | 0.015998118 | 0.024653621 | 0.025261287 | 0.015438616 |
| ENSG00000174547 | 0.022571548 | 0.02726551  | 0.026789414 | 0.020151257 |
| ENSG00000123338 | 0.025015782 | 0.029230924 | 0.029820358 | 0.021373701 |
| ENSG00000129993 | 0.016068201 | 0.024919613 | 0.025990289 | 0.015233611 |
| ENSG00000125843 | 0.031033757 | 0.03136254  | 0.037151451 | 0.034864186 |

|                 |             |             |             |             |
|-----------------|-------------|-------------|-------------|-------------|
| ENSG0000054219  | 0.039137217 | 0.037297998 | 0.037176863 | 0.051449393 |
| ENSG00000184905 | 0.158502044 | 0.132381762 | 0.122764044 | 0.130919481 |
| ENSG00000158477 | 0.016041397 | 0.025011808 | 0.024766657 | 0.016811267 |
| ENSG00000137726 | 0.035543272 | 0.03047923  | 0.028304752 | 0.021473583 |
| ENSG00000152457 | 0.041959628 | 0.038480813 | 0.04270616  | 0.035130034 |
| ENSG00000124145 | 0.055181938 | 0.048923197 | 0.043781011 | 0.052699826 |
| ENSG00000149557 | 0.119851791 | 0.089890786 | 0.070022367 | 0.095149347 |
| ENSG00000214595 | 0.01289763  | 0.023437364 | 0.023898508 | 0.012858465 |
| ENSG00000112210 | 0.015722844 | 0.024942962 | 0.024773246 | 0.014817756 |
| ENSG00000122224 | 0.089271784 | 0.081402645 | 0.061806964 | 0.067964799 |
| ENSG00000028528 | 0.029921127 | 0.036667243 | 0.029981105 | 0.028367462 |
| ENSG00000142552 | 0.035877844 | 0.040503218 | 0.049329183 | 0.035989263 |
| ENSG00000125384 | 0.027608267 | 0.033717609 | 0.039282056 | 0.043862782 |
| ENSG00000163818 | 0.050863941 | 0.044867513 | 0.034598972 | 0.049218746 |
| ENSG00000241644 | 0.015861567 | 0.025267636 | 0.025671535 | 0.015748521 |
| ENSG00000113594 | 0.014363587 | 0.024686574 | 0.025102642 | 0.014361653 |
| ENSG00000189233 | 0.025331702 | 0.029345268 | 0.031202204 | 0.029531124 |
| ENSG00000144554 | 0.021458728 | 0.02584403  | 0.027973337 | 0.017186596 |
| ENSG00000203909 | 0.015527016 | 0.024623242 | 0.025405042 | 0.015016789 |
| ENSG00000124104 | 0.019400452 | 0.028448553 | 0.025805208 | 0.016861092 |
| ENSG00000140043 | 0.01759875  | 0.026206596 | 0.026462311 | 0.015679658 |
| ENSG00000181023 | 0.017693561 | 0.023944016 | 0.023976609 | 0.016468253 |
| ENSG00000135362 | 0.018481095 | 0.026012718 | 0.026758178 | 0.016008074 |
| ENSG00000109180 | 0.025848909 | 0.029985164 | 0.029625056 | 0.034550116 |
| ENSG00000168961 | 0.031051186 | 0.036206403 | 0.038603734 | 0.032765131 |
| ENSG00000142700 | 0.015259161 | 0.025161146 | 0.024618793 | 0.015847971 |
| ENSG00000100253 | 0.029719013 | 0.02749265  | 0.026098415 | 0.019741284 |
| ENSG00000137513 | 0.030356892 | 0.035049287 | 0.030931123 | 0.024183298 |
| ENSG00000186197 | 0.024155678 | 0.026114155 | 0.026724975 | 0.022031574 |
| ENSG00000099958 | 0.076969476 | 0.047603268 | 0.053478183 | 0.060854888 |
| ENSG00000134940 | 0.016399884 | 0.025282253 | 0.024186214 | 0.015943996 |
| ENSG00000133107 | 0.015676281 | 0.025109243 | 0.024896069 | 0.014694895 |
| ENSG00000163171 | 0.040050485 | 0.028579559 | 0.042455917 | 0.026043531 |
| ENSG00000196655 | 0.03322302  | 0.03311469  | 0.03043936  | 0.02400882  |
| ENSG00000187726 | 0.019869129 | 0.027039107 | 0.025664037 | 0.019038053 |
| ENSG00000149541 | 0.022474498 | 0.029809131 | 0.034261991 | 0.024573942 |
| ENSG00000197265 | 0.02627881  | 0.031192462 | 0.029813075 | 0.020932355 |
| ENSG00000163798 | 0.02634648  | 0.030962616 | 0.03163995  | 0.021147859 |
| ENSG00000156875 | 0.025670464 | 0.032970921 | 0.031363008 | 0.024678169 |
| ENSG00000132321 | 0.016862762 | 0.025174188 | 0.02521805  | 0.016637434 |
| ENSG00000172766 | 0.028763473 | 0.042566696 | 0.045679961 | 0.034919097 |
| ENSG00000101986 | 0.017133291 | 0.027265571 | 0.025814391 | 0.017752901 |
| ENSG00000172146 | 0.015804858 | 0.024788147 | 0.02678034  | 0.018423343 |
| ENSG00000127249 | 0.015650388 | 0.025169763 | 0.024619282 | 0.014974648 |
| ENSG00000182518 | 0.024810999 | 0.029158093 | 0.027771008 | 0.020139108 |
| ENSG00000006327 | 0.033048024 | 0.029566369 | 0.027786736 | 0.026791362 |
| ENSG00000213626 | 0.073435349 | 0.062294197 | 0.054278383 | 0.056644078 |
| ENSG00000143006 | 0.016265474 | 0.024933241 | 0.025670443 | 0.014807287 |
| ENSG00000125630 | 0.044286221 | 0.041076429 | 0.035537556 | 0.033413908 |
| ENSG00000163006 | 0.036657899 | 0.038157527 | 0.033818924 | 0.037503987 |
| ENSG00000007376 | 0.035215205 | 0.031548875 | 0.044180819 | 0.040782042 |
| ENSG00000166123 | 0.071468264 | 0.044006839 | 0.043457032 | 0.046962533 |
| ENSG00000136897 | 0.027050374 | 0.033914578 | 0.035067075 | 0.021124138 |
| ENSG00000160877 | 0.017224721 | 0.025635015 | 0.025702801 | 0.016148087 |

|                 |             |             |             |             |
|-----------------|-------------|-------------|-------------|-------------|
| ENSG00000133935 | 0.017273696 | 0.026804784 | 0.027120141 | 0.015395832 |
| ENSG00000213759 | 0.128478695 | 0.191652615 | 0.179222249 | 0.105697396 |
| ENSG00000185220 | 0.038448292 | 0.036489456 | 0.034926732 | 0.032314984 |
| ENSG00000088387 | 0.042587798 | 0.038553619 | 0.032328511 | 0.027132846 |
| ENSG00000106635 | 0.029872811 | 0.04196074  | 0.045996393 | 0.029365418 |
| ENSG00000120948 | 0.031345979 | 0.03469331  | 0.032594271 | 0.023369522 |
| ENSG00000105997 | 0.016338378 | 0.025174282 | 0.024931527 | 0.015547113 |
| ENSG00000198039 | 0.018053909 | 0.025044508 | 0.02532244  | 0.015802543 |
| ENSG00000090905 | 0.026293287 | 0.032531627 | 0.034385728 | 0.021666101 |
| ENSG00000112159 | 0.019342811 | 0.028435343 | 0.026103639 | 0.017435074 |
| ENSG00000143742 | 0.020155138 | 0.028066555 | 0.026465192 | 0.019578722 |
| ENSG00000105352 | 0.015489436 | 0.02518774  | 0.025383778 | 0.015467068 |
| ENSG00000160471 | 0.015415337 | 0.025871874 | 0.02445192  | 0.016338865 |
| ENSG00000064225 | 0.113677836 | 0.100841214 | 0.056992832 | 0.098026917 |
| ENSG00000129195 | 0.083524267 | 0.054395769 | 0.051651875 | 0.065810078 |
| ENSG00000166619 | 0.027924486 | 0.033647072 | 0.0337373   | 0.02826826  |
| ENSG00000113387 | 0.034100317 | 0.03716729  | 0.03371568  | 0.03643354  |
| ENSG00000120699 | 0.02928361  | 0.031003252 | 0.028276173 | 0.021831416 |
| ENSG00000155957 | 0.028269407 | 0.029611666 | 0.030876826 | 0.024671047 |
| ENSG00000132692 | 0.029850703 | 0.045908705 | 0.033275948 | 0.023511484 |
| ENSG00000131398 | 0.015604258 | 0.024537602 | 0.024497698 | 0.014894658 |
| ENSG00000170370 | 0.014755973 | 0.025857236 | 0.024559769 | 0.015046    |
| ENSG00000158435 | 0.0288615   | 0.03766567  | 0.03151151  | 0.030101844 |
| ENSG00000170043 | 0.022463214 | 0.031372849 | 0.03001353  | 0.026108178 |
| ENSG00000078804 | 0.038851618 | 0.057516552 | 0.046303776 | 0.036941741 |
| ENSG00000198768 | 0.016213245 | 0.024925778 | 0.024777473 | 0.015407008 |
| ENSG00000187736 | 0.016295521 | 0.025453495 | 0.025458517 | 0.015900464 |
| ENSG00000149257 | 0.040097417 | 0.03735564  | 0.035622535 | 0.038873395 |
| ENSG00000131504 | 0.023817291 | 0.030023173 | 0.031167378 | 0.024116295 |
| ENSG00000221813 | 0.018028328 | 0.026301197 | 0.026211002 | 0.019373691 |
| ENSG00000144810 | 0.020956552 | 0.024445621 | 0.024888826 | 0.01714138  |
| ENSG00000160013 | 0.029801863 | 0.033954145 | 0.033516082 | 0.030752367 |
| ENSG00000081307 | 0.018020572 | 0.025937672 | 0.025902748 | 0.017531114 |
| ENSG00000177096 | 0.029025374 | 0.030558773 | 0.031603183 | 0.025505911 |
| ENSG00000167380 | 0.042919133 | 0.037742595 | 0.041236184 | 0.036336556 |
| ENSG00000101849 | 0.052751993 | 0.060726569 | 0.045266831 | 0.047179887 |
| ENSG00000128602 | 0.047136695 | 0.046578039 | 0.036471356 | 0.039632125 |
| ENSG00000136925 | 0.023629572 | 0.029382712 | 0.026933243 | 0.019986036 |
| ENSG0000006283  | 0.015517635 | 0.024850234 | 0.024471558 | 0.014258555 |
| ENSG00000135919 | 0.05033154  | 0.058919674 | 0.056159678 | 0.06057798  |
| ENSG00000106780 | 0.042211401 | 0.056037678 | 0.038184501 | 0.042242339 |
| ENSG00000120925 | 0.025640477 | 0.032266091 | 0.028782442 | 0.026878289 |
| ENSG00000204962 | 0.014954851 | 0.025448943 | 0.025101832 | 0.014884887 |
| ENSG00000159403 | 0.017741372 | 0.026189987 | 0.028048532 | 0.018792935 |
| ENSG00000141367 | 0.024957546 | 0.031953068 | 0.027007273 | 0.028654536 |
| ENSG00000182450 | 0.014805413 | 0.024911686 | 0.024831178 | 0.015747466 |
| ENSG00000134452 | 0.032319185 | 0.033702817 | 0.031641205 | 0.027903382 |
| ENSG00000111404 | 0.016819302 | 0.025124181 | 0.024259211 | 0.015245454 |
| ENSG00000167633 | 0.015136723 | 0.025227287 | 0.024683507 | 0.015488441 |
| ENSG00000186432 | 0.03083622  | 0.032862421 | 0.032812187 | 0.030801579 |
| ENSG00000107954 | 0.015374522 | 0.025578166 | 0.024719876 | 0.015301793 |
| ENSG00000167244 | 0.015514512 | 0.024883549 | 0.025490088 | 0.015657401 |
| ENSG00000131015 | 0.021567894 | 0.03076143  | 0.029869145 | 0.015103334 |
| ENSG00000166947 | 0.016105769 | 0.025379058 | 0.02451265  | 0.015157897 |

|                 |             |             |             |             |
|-----------------|-------------|-------------|-------------|-------------|
| ENSG00000213901 | 0.030883765 | 0.031466561 | 0.026634685 | 0.026738205 |
| ENSG00000154274 | 0.02311675  | 0.029306825 | 0.029224513 | 0.028530859 |
| ENSG00000184497 | 0.021186323 | 0.026575702 | 0.027651013 | 0.016992153 |
| ENSG00000130748 | 0.028779385 | 0.029155784 | 0.028199101 | 0.023107144 |
| ENSG00000129128 | 0.041551408 | 0.040009956 | 0.045746476 | 0.039133635 |
| ENSG00000183196 | 0.026615306 | 0.03263635  | 0.029963119 | 0.022668957 |
| ENSG00000159267 | 0.01850803  | 0.027407612 | 0.025938129 | 0.017511071 |
| ENSG00000117394 | 0.044241232 | 0.05261246  | 0.043249089 | 0.048458795 |
| ENSG00000124333 | 0.022017406 | 0.037466486 | 0.030759691 | 0.026208404 |
| ENSG00000016402 | 0.017074316 | 0.025384462 | 0.025133263 | 0.015991404 |
| ENSG00000231322 | 0.015430632 | 0.025330607 | 0.024508159 | 0.014381236 |
| ENSG00000008197 | 0.015121263 | 0.025193747 | 0.025727397 | 0.015731641 |
| ENSG00000205362 | 0.015441772 | 0.025255602 | 0.025318063 | 0.016116437 |
| ENSG00000169967 | 0.031922614 | 0.035532664 | 0.033733796 | 0.030939323 |
| ENSG00000163131 | 0.04087321  | 0.032669185 | 0.037395252 | 0.029990473 |
| ENSG00000132429 | 0.016588417 | 0.024870951 | 0.024781726 | 0.015521121 |
| ENSG00000141298 | 0.035779584 | 0.037880024 | 0.031709318 | 0.031324358 |
| ENSG00000139151 | 0.016088074 | 0.02488095  | 0.025044128 | 0.01689191  |
| ENSG00000165702 | 0.018239207 | 0.026254598 | 0.024992859 | 0.017581481 |
| ENSG00000182872 | 0.023321536 | 0.027985536 | 0.030194549 | 0.022319605 |
| ENSG00000168259 | 0.02299336  | 0.029134335 | 0.029357098 | 0.021562259 |
| ENSG00000099864 | 0.062788751 | 0.031779122 | 0.027913149 | 0.026488539 |
| ENSG00000152464 | 0.025770509 | 0.033913461 | 0.037027026 | 0.02510541  |
| ENSG00000213015 | 0.030504041 | 0.036640787 | 0.043011634 | 0.032618854 |
| ENSG00000049245 | 0.031027988 | 0.037139489 | 0.034327266 | 0.033945437 |
| ENSG00000124688 | 0.023577781 | 0.033867696 | 0.036223317 | 0.021617071 |
| ENSG00000183624 | 0.048907201 | 0.041266959 | 0.038064115 | 0.028924316 |
| ENSG00000109743 | 0.01763999  | 0.025483811 | 0.02751463  | 0.018497267 |
| ENSG00000165527 | 0.03901999  | 0.047225774 | 0.045962234 | 0.055285536 |
| ENSG00000126500 | 0.015503744 | 0.025801643 | 0.024703386 | 0.01442639  |
| ENSG00000071282 | 0.109094375 | 0.089146443 | 0.075833832 | 0.092483663 |
| ENSG00000142089 | 0.060987034 | 0.051144535 | 0.057870623 | 0.053093079 |
| ENSG00000031544 | 0.015442623 | 0.024942992 | 0.024474776 | 0.0149384   |
| ENSG00000250834 | 0.022651587 | 0.026429002 | 0.028990045 | 0.020589575 |
| ENSG00000221937 | 0.018192203 | 0.026217569 | 0.027821869 | 0.01781491  |
| ENSG00000243709 | 0.019619472 | 0.026809527 | 0.026038394 | 0.016180035 |
| ENSG00000134250 | 0.033377796 | 0.028045145 | 0.029790547 | 0.02822442  |
| ENSG00000166111 | 0.01405063  | 0.025045128 | 0.024966106 | 0.014517541 |
| ENSG00000116824 | 0.059182091 | 0.063209306 | 0.026774475 | 0.027442766 |
| ENSG00000159579 | 0.02903393  | 0.035619557 | 0.04076421  | 0.023757082 |
| ENSG00000107338 | 0.034020298 | 0.03797472  | 0.033917842 | 0.028241699 |
| ENSG00000153560 | 0.028022956 | 0.035239841 | 0.036272052 | 0.024763191 |
| ENSG00000135314 | 0.016221021 | 0.025001433 | 0.025889878 | 0.016985951 |
| ENSG00000011260 | 0.032423127 | 0.038957061 | 0.03126044  | 0.030564125 |
| ENSG00000161011 | 0.077492004 | 0.067665975 | 0.054928729 | 0.052263029 |
| ENSG00000106070 | 0.01697243  | 0.02665599  | 0.026942173 | 0.014815497 |
| ENSG00000135697 | 0.062198662 | 0.078711283 | 0.072910931 | 0.085392676 |
| ENSG00000145390 | 0.017349758 | 0.027069762 | 0.025962263 | 0.017751869 |
| ENSG00000241370 | 0.024704999 | 0.028406654 | 0.030524138 | 0.023299878 |
| ENSG00000123607 | 0.016087648 | 0.024883057 | 0.024209726 | 0.015353037 |
| ENSG00000167965 | 0.025812319 | 0.028431857 | 0.032654167 | 0.028589803 |
| ENSG00000167191 | 0.025030146 | 0.027358028 | 0.028477473 | 0.024970277 |
| ENSG00000139182 | 0.016922818 | 0.027686136 | 0.025826917 | 0.020184668 |
| ENSG00000089169 | 0.016975905 | 0.027394951 | 0.02649864  | 0.016302475 |

|                 |             |             |             |             |
|-----------------|-------------|-------------|-------------|-------------|
| ENSG00000187796 | 0.119011261 | 0.07837556  | 0.075407995 | 0.080095032 |
| ENSG00000179477 | 0.016497784 | 0.025648055 | 0.025185398 | 0.016199464 |
| ENSG00000053371 | 0.032522381 | 0.036973627 | 0.036298222 | 0.032792912 |
| ENSG00000166278 | 0.016540483 | 0.02630238  | 0.025732123 | 0.01698829  |
| ENSG00000175322 | 0.040394476 | 0.041474426 | 0.036408947 | 0.041765271 |
| ENSG00000170296 | 0.018536417 | 0.026109582 | 0.028401915 | 0.018833539 |
| ENSG00000164663 | 0.015212608 | 0.025187287 | 0.025565992 | 0.015659722 |
| ENSG00000170128 | 0.030674228 | 0.028530061 | 0.026877683 | 0.016843346 |
| ENSG00000106541 | 0.015533565 | 0.024414021 | 0.025267309 | 0.014057696 |
| ENSG00000158186 | 0.019832454 | 0.026226301 | 0.024993477 | 0.017805211 |
| ENSG00000184007 | 0.032507101 | 0.034648947 | 0.033454006 | 0.032566622 |
| ENSG00000122378 | 0.027766084 | 0.033535535 | 0.033968954 | 0.029792801 |
| ENSG00000212901 | 0.015957823 | 0.025707054 | 0.024644837 | 0.014587194 |
| ENSG00000154642 | 0.038896796 | 0.046428001 | 0.060953636 | 0.042174976 |
| ENSG00000122824 | 0.019232519 | 0.025336052 | 0.025517162 | 0.016789197 |
| ENSG00000104332 | 0.071087748 | 0.040243536 | 0.039865846 | 0.056530407 |
| ENSG00000242221 | 0.015798976 | 0.025675244 | 0.025079283 | 0.015669967 |
| ENSG00000184586 | 0.016650534 | 0.026048936 | 0.025850572 | 0.016881264 |
| ENSG00000127084 | 0.037967385 | 0.035853149 | 0.035509698 | 0.03477696  |
| ENSG00000164597 | 0.029389184 | 0.031549205 | 0.030550006 | 0.02746588  |
| ENSG00000122335 | 0.019602302 | 0.027093068 | 0.026452977 | 0.017466417 |
| ENSG00000005381 | 0.018416363 | 0.027169311 | 0.026512768 | 0.017361721 |
| ENSG00000125449 | 0.034275721 | 0.037670411 | 0.045680365 | 0.032387817 |
| ENSG00000223380 | 0.023014823 | 0.029771734 | 0.031669979 | 0.023210422 |
| ENSG00000124570 | 0.091992312 | 0.079412142 | 0.055331334 | 0.092592096 |
| ENSG00000116922 | 0.033745059 | 0.036755076 | 0.034267291 | 0.033879726 |
| ENSG00000198729 | 0.018021092 | 0.027027755 | 0.026696918 | 0.016813646 |
| ENSG00000188313 | 0.061742678 | 0.054381767 | 0.055334566 | 0.051088486 |
| ENSG00000101323 | 0.017759191 | 0.026600511 | 0.026290943 | 0.01623809  |
| ENSG00000175348 | 0.027171659 | 0.037364844 | 0.039354202 | 0.028233768 |
| ENSG00000184611 | 0.016831718 | 0.024996438 | 0.02519532  | 0.016673999 |
| ENSG00000106571 | 0.015520162 | 0.024557484 | 0.025683239 | 0.014673068 |
| ENSG00000156261 | 0.020919281 | 0.027933521 | 0.027034192 | 0.021177013 |
| ENSG00000179083 | 0.022302401 | 0.026083783 | 0.026568328 | 0.017301784 |
| ENSG00000236613 | 0.016213428 | 0.026020531 | 0.025104942 | 0.015022331 |
| ENSG00000107581 | 0.025323484 | 0.031047914 | 0.029242189 | 0.023895232 |
| ENSG00000176381 | 0.104669209 | 0.108171904 | 0.093613349 | 0.102178036 |
| ENSG00000168509 | 0.037089198 | 0.038731734 | 0.028870718 | 0.023147394 |
| ENSG00000111666 | 0.066336202 | 0.063885857 | 0.05806083  | 0.049423231 |
| ENSG00000204611 | 0.031251847 | 0.039196826 | 0.031537805 | 0.031342345 |
| ENSG00000100296 | 0.015012932 | 0.025349677 | 0.025262662 | 0.017329152 |
| ENSG00000110619 | 0.032810808 | 0.030619199 | 0.035344752 | 0.029066242 |
| ENSG00000159335 | 0.043914201 | 0.042812131 | 0.047648925 | 0.048410648 |
| ENSG00000096996 | 0.018180578 | 0.027714632 | 0.026504176 | 0.018482814 |
| ENSG00000085872 | 0.027675847 | 0.033557132 | 0.039425913 | 0.028744372 |
| ENSG00000154864 | 0.142268912 | 0.132347972 | 0.106725611 | 0.11456401  |
| ENSG00000013503 | 0.03924195  | 0.039185724 | 0.03571196  | 0.043683514 |
| ENSG00000100147 | 0.023622745 | 0.02898508  | 0.026302575 | 0.019567101 |
| ENSG00000117226 | 0.068123209 | 0.062504667 | 0.062408705 | 0.04526541  |
| ENSG00000118508 | 0.07845356  | 0.032135531 | 0.030119968 | 0.033666896 |
| ENSG00000139323 | 0.03661468  | 0.034643965 | 0.032562973 | 0.029878016 |
| ENSG00000196963 | 0.017899955 | 0.025320506 | 0.025531997 | 0.016488241 |
| ENSG00000109158 | 0.015348574 | 0.024780487 | 0.024612801 | 0.014988103 |
| ENSG00000164742 | 0.112309621 | 0.049809477 | 0.042502676 | 0.060922548 |



|                 |             |             |             |             |
|-----------------|-------------|-------------|-------------|-------------|
| ENSG00000177508 | 0.016597255 | 0.025021857 | 0.02506307  | 0.015469068 |
| ENSG00000102962 | 0.06543253  | 0.044098851 | 0.042214974 | 0.052849672 |
| ENSG00000155287 | 0.024360756 | 0.030219757 | 0.033604409 | 0.02317996  |
| ENSG00000196966 | 0.031202309 | 0.037449338 | 0.038680565 | 0.039538567 |
| ENSG00000125148 | 0.067425349 | 0.063500302 | 0.06463028  | 0.068188705 |
| ENSG00000172208 | 0.017080567 | 0.025211737 | 0.024277238 | 0.015082789 |
| ENSG00000122965 | 0.036928628 | 0.034955083 | 0.035703254 | 0.036545785 |
| ENSG00000184060 | 0.073844608 | 0.068523777 | 0.067030186 | 0.054515643 |
| ENSG00000106025 | 0.074863327 | 0.055374495 | 0.055937752 | 0.053526197 |
| ENSG00000130724 | 0.019047117 | 0.026701722 | 0.027937666 | 0.017056911 |
| ENSG00000186193 | 0.079793829 | 0.055365927 | 0.0509357   | 0.061113093 |
| ENSG00000167900 | 0.049088684 | 0.042362625 | 0.034862022 | 0.03338484  |
| ENSG00000152601 | 0.033214784 | 0.035589954 | 0.034443747 | 0.024202369 |
| ENSG00000156968 | 0.015899236 | 0.025378431 | 0.024836223 | 0.015053068 |
| ENSG00000158805 | 0.022350694 | 0.028640521 | 0.027815435 | 0.021339681 |
| ENSG00000185149 | 0.016651807 | 0.026070955 | 0.024597278 | 0.016092475 |
| ENSG00000136247 | 0.017050575 | 0.02596043  | 0.02526757  | 0.016891832 |
| ENSG00000135740 | 0.060938814 | 0.048554141 | 0.042409521 | 0.034691062 |
| ENSG00000198901 | 0.037741313 | 0.030607115 | 0.032991424 | 0.027192426 |
| ENSG00000137968 | 0.017631725 | 0.024551522 | 0.024347492 | 0.015695778 |
| ENSG00000108671 | 0.025122161 | 0.030246194 | 0.028816399 | 0.020722655 |
| ENSG00000105374 | 0.029391084 | 0.038124811 | 0.030698511 | 0.043919475 |
| ENSG00000025039 | 0.101588668 | 0.0663478   | 0.055849213 | 0.07686704  |
| ENSG00000183765 | 0.02865857  | 0.035414376 | 0.029011201 | 0.03821018  |
| ENSG00000016082 | 0.01779934  | 0.025513646 | 0.024784764 | 0.016041802 |
| ENSG00000118513 | 0.04956336  | 0.056698576 | 0.047584257 | 0.049813364 |
| ENSG00000132437 | 0.021781556 | 0.025650426 | 0.02595374  | 0.016494006 |
| ENSG00000007312 | 0.056951742 | 0.053968701 | 0.050444377 | 0.041575338 |
| ENSG00000184330 | 0.015502607 | 0.02516881  | 0.025822618 | 0.016132215 |
| ENSG00000102230 | 0.018386527 | 0.026734954 | 0.025339867 | 0.019827334 |
| ENSG00000185070 | 0.01538586  | 0.024552495 | 0.02568977  | 0.015595237 |
| ENSG00000163466 | 0.021430018 | 0.030345465 | 0.028755    | 0.02312261  |
| ENSG00000124449 | 0.014600623 | 0.024782129 | 0.024619374 | 0.013787355 |
| ENSG00000116147 | 0.014456133 | 0.024410877 | 0.024717911 | 0.013827689 |
| ENSG00000160193 | 0.046835352 | 0.044241007 | 0.036539905 | 0.040605288 |
| ENSG00000124103 | 0.016875412 | 0.027883273 | 0.025156552 | 0.015519771 |
| ENSG00000136436 | 0.031689652 | 0.034278416 | 0.032210834 | 0.034917    |
| ENSG00000100711 | 0.032022028 | 0.039260086 | 0.033048767 | 0.031128374 |
| ENSG00000180138 | 0.014785388 | 0.024961762 | 0.025742702 | 0.015991187 |
| ENSG00000107807 | 0.016890186 | 0.026384993 | 0.024937746 | 0.016830071 |
| ENSG00000123989 | 0.0465446   | 0.04257507  | 0.046114259 | 0.046835017 |
| ENSG00000167778 | 0.028190775 | 0.031230527 | 0.03515972  | 0.031446114 |
| ENSG00000109272 | 0.016484124 | 0.026679775 | 0.025948374 | 0.015972986 |
| ENSG00000179636 | 0.017029405 | 0.025085641 | 0.025171907 | 0.015683583 |
| ENSG00000082126 | 0.016511154 | 0.025016812 | 0.025319869 | 0.015772867 |
| ENSG00000214900 | 0.022670206 | 0.029527604 | 0.027975761 | 0.019488929 |
| ENSG00000143466 | 0.029564871 | 0.036493447 | 0.029583672 | 0.028745651 |
| ENSG00000186834 | 0.042086396 | 0.047577919 | 0.053098492 | 0.041534101 |
| ENSG00000142920 | 0.017322693 | 0.025635167 | 0.024682891 | 0.017393149 |
| ENSG00000085552 | 0.018619223 | 0.026191897 | 0.025692966 | 0.01502194  |
| ENSG00000130768 | 0.018073201 | 0.026630945 | 0.02623604  | 0.020459351 |
| ENSG00000179455 | 0.017596147 | 0.024711417 | 0.024837217 | 0.016140142 |
| ENSG00000103343 | 0.019181985 | 0.027358695 | 0.027782271 | 0.0176485   |
| ENSG00000174004 | 0.044445127 | 0.052529904 | 0.056851406 | 0.044721508 |

|                 |             |             |             |             |
|-----------------|-------------|-------------|-------------|-------------|
| ENSG00000188807 | 0.024678474 | 0.032835919 | 0.031988301 | 0.026684855 |
| ENSG00000108753 | 0.129571205 | 0.065543745 | 0.071577233 | 0.096812323 |
| ENSG00000115738 | 0.069361744 | 0.06667176  | 0.062153326 | 0.067885624 |
| ENSG00000071626 | 0.017446934 | 0.026072893 | 0.026369966 | 0.018833795 |
| ENSG00000122971 | 0.029517348 | 0.036800142 | 0.031926985 | 0.027029847 |
| ENSG00000088827 | 0.015262805 | 0.025623837 | 0.025063691 | 0.015671153 |
| ENSG00000123353 | 0.024210834 | 0.029578352 | 0.027570299 | 0.022079617 |
| ENSG00000048405 | 0.033255139 | 0.047538945 | 0.05240847  | 0.03804811  |
| ENSG00000237172 | 0.039766199 | 0.041175381 | 0.04671397  | 0.044121996 |
| ENSG00000101076 | 0.016145789 | 0.025135214 | 0.02616549  | 0.016739128 |
| ENSG00000139190 | 0.018028548 | 0.025924418 | 0.025758626 | 0.016012685 |
| ENSG00000121406 | 0.030109289 | 0.031466648 | 0.031850782 | 0.028118909 |
| ENSG00000115419 | 0.040180699 | 0.044702631 | 0.036366074 | 0.034619961 |
| ENSG00000100565 | 0.018294526 | 0.026554933 | 0.025561893 | 0.015569802 |
| ENSG00000185485 | 0.024030055 | 0.03432241  | 0.031020729 | 0.028984324 |
| ENSG00000130175 | 0.024451041 | 0.032916071 | 0.035839355 | 0.026564179 |
| ENSG00000106397 | 0.031337301 | 0.034634985 | 0.032029185 | 0.031372893 |
| ENSG00000244462 | 0.037741464 | 0.039759816 | 0.037191077 | 0.029190219 |
| ENSG00000170191 | 0.015051984 | 0.024914534 | 0.025312531 | 0.015595992 |
| ENSG00000101084 | 0.026068557 | 0.030513725 | 0.031732663 | 0.02664332  |
| ENSG00000099365 | 0.016309672 | 0.024017031 | 0.024948293 | 0.015055325 |
| ENSG00000105364 | 0.019145026 | 0.029646956 | 0.027007057 | 0.018197907 |
| ENSG00000173992 | 0.029502248 | 0.030211796 | 0.033317104 | 0.031645671 |
| ENSG00000136122 | 0.037383049 | 0.03605911  | 0.037079803 | 0.031019681 |
| ENSG00000185962 | 0.020147365 | 0.027616438 | 0.030559411 | 0.018843616 |
| ENSG00000115295 | 0.029255001 | 0.034924289 | 0.030866318 | 0.024661311 |
| ENSG00000132199 | 0.043382178 | 0.050587484 | 0.04712897  | 0.036342342 |
| ENSG00000103653 | 0.031314529 | 0.031572691 | 0.031584655 | 0.02599557  |
| ENSG00000070614 | 0.01584431  | 0.025319181 | 0.025644383 | 0.015424039 |
| ENSG00000226372 | 0.018871079 | 0.026635888 | 0.025930497 | 0.017555486 |
| ENSG00000164604 | 0.015808704 | 0.024405657 | 0.024411964 | 0.013740736 |
| ENSG00000187815 | 0.030531144 | 0.038531132 | 0.039029183 | 0.030867886 |
| ENSG00000151116 | 0.033997659 | 0.044653424 | 0.037887603 | 0.039333743 |
| ENSG00000169057 | 0.020667738 | 0.030064894 | 0.02991229  | 0.021431178 |
| ENSG00000162599 | 0.024558592 | 0.024874127 | 0.025666745 | 0.016109917 |
| ENSG00000173175 | 0.016996741 | 0.026335752 | 0.025353857 | 0.028607786 |
| ENSG00000205730 | 0.018980316 | 0.028156956 | 0.028492274 | 0.018350776 |
| ENSG00000163209 | 0.015812253 | 0.024537403 | 0.025071985 | 0.015877264 |
| ENSG00000088320 | 0.015462545 | 0.025282282 | 0.02422588  | 0.015539827 |
| ENSG00000167513 | 0.04496506  | 0.045272202 | 0.040545089 | 0.041633224 |
| ENSG00000102218 | 0.015457142 | 0.024670208 | 0.024800113 | 0.015813291 |
| ENSG00000130299 | 0.015989173 | 0.024802792 | 0.024356761 | 0.014285545 |
| ENSG00000144648 | 0.015397908 | 0.025773672 | 0.024501874 | 0.014877911 |
| ENSG00000169896 | 0.081707003 | 0.066650528 | 0.061163119 | 0.063734015 |
| ENSG00000066336 | 0.033223792 | 0.037838479 | 0.041322006 | 0.041535021 |
| ENSG00000189056 | 0.01654397  | 0.024678661 | 0.024796338 | 0.015434224 |
| ENSG00000139767 | 0.016066115 | 0.025167745 | 0.025006317 | 0.015720585 |
| ENSG00000126251 | 0.015920708 | 0.025615265 | 0.024549746 | 0.014886755 |
| ENSG00000160882 | 0.014818905 | 0.025626247 | 0.024725115 | 0.015672696 |
| ENSG00000172201 | 0.016455448 | 0.025079035 | 0.026040275 | 0.015766074 |
| ENSG00000196975 | 0.039786215 | 0.043117146 | 0.039409406 | 0.040219122 |
| ENSG00000035403 | 0.065292497 | 0.051370245 | 0.058421116 | 0.059512272 |
| ENSG00000168329 | 0.016996254 | 0.025424844 | 0.026524511 | 0.015728544 |
| ENSG00000175065 | 0.017041812 | 0.02738195  | 0.027082725 | 0.017886463 |

|                |             |             |             |             |
|----------------|-------------|-------------|-------------|-------------|
| ENSG0000063438 | 0.026983202 | 0.034102635 | 0.032377009 | 0.030031884 |
| ENSG0000055813 | 0.044342552 | 0.0247405   | 0.024904319 | 0.016183201 |
| ENSG0000110700 | 0.015921497 | 0.024054427 | 0.024348545 | 0.016357486 |
| ENSG0000173221 | 0.036132527 | 0.04621873  | 0.037658654 | 0.035611405 |
| ENSG0000163935 | 0.029054001 | 0.033384136 | 0.030759033 | 0.026570571 |
| ENSG0000111335 | 0.052892187 | 0.054386637 | 0.042373165 | 0.04104099  |
| ENSG0000213585 | 0.02090388  | 0.027649194 | 0.026233513 | 0.020143082 |
| ENSG0000164347 | 0.015285586 | 0.025755602 | 0.025514321 | 0.014998237 |
| ENSG0000159792 | 0.035103452 | 0.033100858 | 0.032251373 | 0.028675211 |
| ENSG0000084764 | 0.027531379 | 0.02774944  | 0.025799864 | 0.024487287 |
| ENSG0000185650 | 0.024454581 | 0.031793523 | 0.032858426 | 0.024456761 |
| ENSG0000143458 | 0.027626443 | 0.030459816 | 0.029221944 | 0.028788364 |
| ENSG0000197405 | 0.144033685 | 0.098376467 | 0.062942529 | 0.08103761  |
| ENSG0000231924 | 0.017905657 | 0.025220195 | 0.024390624 | 0.016588461 |
| ENSG0000170949 | 0.023934106 | 0.034131495 | 0.031821959 | 0.021526645 |
| ENSG0000061987 | 0.018115193 | 0.027075285 | 0.026546292 | 0.01712984  |
| ENSG0000130635 | 0.161358965 | 0.099772473 | 0.086906324 | 0.121332948 |
| ENSG0000179889 | 0.0209707   | 0.025017913 | 0.026600265 | 0.018049594 |
| ENSG0000136295 | 0.014333823 | 0.023537401 | 0.023677569 | 0.013647539 |
| ENSG0000131495 | 0.020945809 | 0.02795925  | 0.027181908 | 0.018079158 |
| ENSG0000136279 | 0.032741325 | 0.03512513  | 0.035066991 | 0.028364379 |
| ENSG0000145740 | 0.032091472 | 0.035039754 | 0.031349318 | 0.035669644 |
| ENSG0000140403 | 0.070404383 | 0.05704668  | 0.060237905 | 0.049432487 |
| ENSG0000129292 | 0.025051019 | 0.026847504 | 0.034279212 | 0.022669196 |
| ENSG0000163138 | 0.016650544 | 0.025662197 | 0.02641763  | 0.01727699  |
| ENSG0000128284 | 0.014667306 | 0.024869125 | 0.024788156 | 0.015882047 |
| ENSG0000166589 | 0.016631223 | 0.024833612 | 0.02420331  | 0.016517917 |
| ENSG0000160408 | 0.037549063 | 0.037268695 | 0.036210803 | 0.035124244 |
| ENSG0000160683 | 0.016545711 | 0.025099584 | 0.025315469 | 0.017230418 |
| ENSG0000091656 | 0.035116217 | 0.032829415 | 0.025114742 | 0.018941703 |
| ENSG0000149403 | 0.021593752 | 0.026131561 | 0.026103314 | 0.019114885 |
| ENSG0000171804 | 0.014480695 | 0.025465486 | 0.025081521 | 0.015695137 |
| ENSG0000164764 | 0.016979461 | 0.025091656 | 0.024652744 | 0.015084831 |
| ENSG0000130699 | 0.028435076 | 0.035405718 | 0.032937618 | 0.0240749   |
| ENSG0000182393 | 0.017187168 | 0.024969972 | 0.025035908 | 0.015223261 |
| ENSG0000173409 | 0.028880717 | 0.03137057  | 0.033593468 | 0.029738019 |
| ENSG0000108406 | 0.024093711 | 0.031836898 | 0.032540622 | 0.02085447  |
| ENSG0000149923 | 0.019099946 | 0.028265477 | 0.031269164 | 0.020810583 |
| ENSG0000034971 | 0.053969504 | 0.024605521 | 0.025473498 | 0.014511897 |
| ENSG0000105707 | 0.016097905 | 0.024744011 | 0.024596064 | 0.015665941 |
| ENSG0000145819 | 0.031648948 | 0.031032789 | 0.028938624 | 0.029421036 |
| ENSG0000154438 | 0.015885792 | 0.024127411 | 0.024566711 | 0.014937065 |
| ENSG0000163067 | 0.02449292  | 0.029050189 | 0.025930332 | 0.020312121 |
| ENSG0000213401 | 0.018510966 | 0.024598901 | 0.027411787 | 0.015263466 |
| ENSG0000173546 | 0.021110715 | 0.02950256  | 0.028782222 | 0.024075103 |
| ENSG0000083845 | 0.016850498 | 0.025043325 | 0.025422    | 0.017043176 |
| ENSG0000112592 | 0.025412695 | 0.031525159 | 0.032317928 | 0.02065085  |
| ENSG0000125124 | 0.052023051 | 0.045936196 | 0.034467848 | 0.047027608 |
| ENSG0000157796 | 0.038842314 | 0.044517167 | 0.036860099 | 0.030857113 |
| ENSG0000170178 | 0.01681672  | 0.024962025 | 0.025638258 | 0.014680069 |
| ENSG0000198601 | 0.0134951   | 0.023964759 | 0.024263967 | 0.013221488 |
| ENSG0000177119 | 0.029507531 | 0.036702661 | 0.036820584 | 0.028445509 |
| ENSG0000106153 | 0.017225676 | 0.025113578 | 0.024983262 | 0.017026635 |
| ENSG0000087338 | 0.045504271 | 0.047926406 | 0.037404151 | 0.037492042 |

|                 |             |             |             |             |
|-----------------|-------------|-------------|-------------|-------------|
| ENSG00000105695 | 0.016232537 | 0.025605172 | 0.025038914 | 0.015808448 |
| ENSG00000170242 | 0.026225041 | 0.03521415  | 0.035510731 | 0.022349511 |
| ENSG00000146192 | 0.067371193 | 0.050147639 | 0.044330428 | 0.051790526 |
| ENSG00000132382 | 0.03757976  | 0.034647941 | 0.034181157 | 0.034406455 |
| ENSG00000105967 | 0.023702683 | 0.026020248 | 0.026940296 | 0.036094025 |
| ENSG00000139668 | 0.032360305 | 0.036728007 | 0.036108571 | 0.032316241 |
| ENSG00000163406 | 0.029738942 | 0.033834126 | 0.029199898 | 0.033583425 |
| ENSG00000069509 | 0.032833695 | 0.032963484 | 0.036693605 | 0.028121649 |
| ENSG00000116095 | 0.025881547 | 0.035785977 | 0.036242815 | 0.025958581 |
| ENSG00000172468 | 0.016536075 | 0.026385656 | 0.02492682  | 0.016875937 |
| ENSG00000184260 | 0.062489251 | 0.062112676 | 0.05436015  | 0.050793549 |
| ENSG00000163762 | 0.017008575 | 0.025591748 | 0.025263899 | 0.017612282 |
| ENSG00000143409 | 0.027133014 | 0.030963324 | 0.029733049 | 0.025314478 |
| ENSG00000100997 | 0.077241048 | 0.056004135 | 0.067425345 | 0.060317767 |
| ENSG00000169688 | 0.015302493 | 0.024089521 | 0.024874368 | 0.015320851 |
| ENSG00000175893 | 0.032334708 | 0.041287186 | 0.036449657 | 0.033453881 |
| ENSG00000162543 | 0.023323199 | 0.026843991 | 0.034077039 | 0.028844123 |
| ENSG00000156831 | 0.028871681 | 0.031111328 | 0.034543134 | 0.022741036 |
| ENSG00000112305 | 0.034661594 | 0.040023936 | 0.031250323 | 0.028180732 |
| ENSG00000108294 | 0.022506711 | 0.027821979 | 0.027079028 | 0.020486338 |
| ENSG00000100505 | 0.037423905 | 0.047170592 | 0.034336931 | 0.023974556 |
| ENSG00000144674 | 0.03349664  | 0.038804304 | 0.038383682 | 0.041216773 |
| ENSG00000142949 | 0.026424928 | 0.031680823 | 0.028985374 | 0.024079007 |
| ENSG00000082438 | 0.017296585 | 0.025470451 | 0.025486231 | 0.017865593 |
| ENSG00000159592 | 0.021724495 | 0.032256423 | 0.03170155  | 0.017484705 |
| ENSG00000239264 | 0.044925372 | 0.044865557 | 0.043949188 | 0.04386954  |
| ENSG00000125962 | 0.05693032  | 0.037446718 | 0.036446912 | 0.047615901 |
| ENSG00000164877 | 0.022591236 | 0.029994646 | 0.032641093 | 0.019664615 |
| ENSG00000164649 | 0.048276679 | 0.036073052 | 0.032678475 | 0.029668535 |
| ENSG00000145244 | 0.015829207 | 0.025579619 | 0.025570344 | 0.015591584 |
| ENSG00000109787 | 0.018345283 | 0.02636787  | 0.026276097 | 0.018219662 |
| ENSG00000147224 | 0.030665982 | 0.03248661  | 0.030530686 | 0.027225967 |
| ENSG00000106804 | 0.039231874 | 0.044049718 | 0.033919448 | 0.032515921 |
| ENSG00000065717 | 0.020951476 | 0.026961928 | 0.026906173 | 0.02068224  |
| ENSG00000181541 | 0.014988776 | 0.026600142 | 0.025013292 | 0.015020643 |
| ENSG00000049323 | 0.040265932 | 0.027120025 | 0.025240624 | 0.01979808  |
| ENSG00000058668 | 0.016018516 | 0.025306328 | 0.025241073 | 0.014902639 |
| ENSG00000121377 | 0.014756531 | 0.023999901 | 0.02433758  | 0.016450826 |
| ENSG00000178035 | 0.025107802 | 0.028058838 | 0.027881712 | 0.021808688 |
| ENSG00000116721 | 0.025990612 | 0.024755368 | 0.025069087 | 0.016966312 |
| ENSG00000104907 | 0.027280673 | 0.030713879 | 0.029131173 | 0.024190934 |
| ENSG00000109861 | 0.049641999 | 0.053883033 | 0.051177386 | 0.056043371 |
| ENSG00000104213 | 0.035552678 | 0.038887567 | 0.029608182 | 0.02716735  |
| ENSG00000087263 | 0.024646731 | 0.032612569 | 0.03303974  | 0.02613434  |
| ENSG00000100445 | 0.026501686 | 0.034653502 | 0.035112214 | 0.032159565 |
| ENSG00000152292 | 0.015013313 | 0.025636534 | 0.024506154 | 0.014630407 |
| ENSG00000164830 | 0.038650557 | 0.045409706 | 0.037404105 | 0.033302439 |
| ENSG00000169740 | 0.033805299 | 0.037334805 | 0.035241137 | 0.027007391 |
| ENSG00000157765 | 0.014694895 | 0.025227492 | 0.024862832 | 0.013957338 |
| ENSG00000123240 | 0.036664333 | 0.034930257 | 0.03560397  | 0.02946831  |
| ENSG00000111305 | 0.017092425 | 0.025599363 | 0.025060765 | 0.014029636 |
| ENSG00000019995 | 0.042708303 | 0.039280325 | 0.042170554 | 0.041555069 |
| ENSG00000005421 | 0.014902258 | 0.024741173 | 0.024176994 | 0.015332501 |
| ENSG00000174373 | 0.029625255 | 0.035484579 | 0.032612811 | 0.03022583  |

|                 |             |             |             |             |
|-----------------|-------------|-------------|-------------|-------------|
| ENSG0000099617  | 0.016474055 | 0.025745006 | 0.025718517 | 0.016929039 |
| ENSG00000124788 | 0.055883813 | 0.048421451 | 0.049429682 | 0.040415202 |
| ENSG0000078369  | 0.018346758 | 0.026311056 | 0.026999989 | 0.017916345 |
| ENSG0000086967  | 0.090611167 | 0.078407533 | 0.076308334 | 0.060926098 |
| ENSG00000165072 | 0.014850492 | 0.025385847 | 0.024773124 | 0.015545591 |
| ENSG00000126249 | 0.02987611  | 0.029987214 | 0.031443105 | 0.027908706 |
| ENSG00000138587 | 0.046004928 | 0.050794953 | 0.037418447 | 0.044604368 |
| ENSG00000172059 | 0.019613173 | 0.025288574 | 0.025504074 | 0.016819924 |
| ENSG00000134057 | 0.037679429 | 0.034309319 | 0.034846414 | 0.033466441 |
| ENSG00000172199 | 0.016068096 | 0.024723057 | 0.025059628 | 0.016515369 |
| ENSG00000115761 | 0.01667737  | 0.025478732 | 0.025037763 | 0.01478924  |
| ENSG00000123307 | 0.016726705 | 0.025596742 | 0.023942556 | 0.014933809 |
| ENSG00000117713 | 0.016874792 | 0.026330865 | 0.026319067 | 0.016193916 |
| ENSG00000185899 | 0.016271329 | 0.025712185 | 0.024624649 | 0.015288844 |
| ENSG00000130985 | 0.016358159 | 0.025476179 | 0.025551137 | 0.016946409 |
| ENSG00000152520 | 0.027186986 | 0.032678415 | 0.032895626 | 0.02709534  |
| ENSG00000166780 | 0.018982717 | 0.026928887 | 0.024988183 | 0.01817466  |
| ENSG00000136827 | 0.030592435 | 0.035487245 | 0.042757997 | 0.031423248 |
| ENSG00000125779 | 0.015044037 | 0.02592399  | 0.024154773 | 0.015216578 |
| ENSG00000171606 | 0.022696958 | 0.030481611 | 0.032706639 | 0.025917777 |
| ENSG00000130649 | 0.03309595  | 0.03221001  | 0.02944686  | 0.0304395   |
| ENSG00000150625 | 0.07533226  | 0.032887974 | 0.025563444 | 0.018449549 |
| ENSG00000138670 | 0.017275465 | 0.027521028 | 0.025641807 | 0.017156384 |
| ENSG00000178184 | 0.015575157 | 0.025704133 | 0.024799139 | 0.015613008 |
| ENSG00000023734 | 0.022653031 | 0.027783254 | 0.02961863  | 0.026635749 |
| ENSG00000179152 | 0.021087313 | 0.030400698 | 0.030109489 | 0.020506629 |
| ENSG00000068383 | 0.051836681 | 0.04696515  | 0.048570002 | 0.05132136  |
| ENSG00000251664 | 0.016465984 | 0.026105563 | 0.025631678 | 0.016503504 |
| ENSG00000078579 | 0.016340452 | 0.025323885 | 0.025240091 | 0.016897377 |
| ENSG00000172508 | 0.016408515 | 0.024659284 | 0.024208678 | 0.016586015 |
| ENSG00000137473 | 0.016718522 | 0.025059249 | 0.024770087 | 0.015467211 |
| ENSG00000204086 | 0.016795246 | 0.024741811 | 0.026077802 | 0.015796884 |
| ENSG00000127318 | 0.016175203 | 0.024596259 | 0.024892602 | 0.015281927 |
| ENSG00000164123 | 0.018565521 | 0.025556622 | 0.026040986 | 0.017689601 |
| ENSG00000105254 | 0.025951642 | 0.032563979 | 0.031265853 | 0.027737241 |
| ENSG00000125944 | 0.025261331 | 0.03272932  | 0.029309291 | 0.027181097 |
| ENSG00000134480 | 0.027738893 | 0.030385344 | 0.029547615 | 0.025257648 |
| ENSG00000178306 | 0.015284573 | 0.024897912 | 0.024977194 | 0.015256643 |
| ENSG00000079277 | 0.023174242 | 0.031796254 | 0.035643808 | 0.022546124 |
| ENSG00000126016 | 0.101078276 | 0.102123102 | 0.101075375 | 0.082073036 |
| ENSG00000146007 | 0.024550125 | 0.030566272 | 0.032711295 | 0.022414266 |
| ENSG00000101558 | 0.032990319 | 0.035445567 | 0.035891675 | 0.030312922 |
| ENSG00000205423 | 0.024803416 | 0.031082292 | 0.031535881 | 0.026412255 |
| ENSG00000178935 | 0.022288213 | 0.033050304 | 0.028779781 | 0.022615413 |
| ENSG00000153310 | 0.031633242 | 0.036963017 | 0.035925023 | 0.029727806 |
| ENSG00000186943 | 0.015432413 | 0.024810771 | 0.026134723 | 0.015147665 |
| ENSG00000013619 | 0.016272134 | 0.025339494 | 0.025262512 | 0.016188818 |
| ENSG00000102390 | 0.035807369 | 0.03286147  | 0.036243645 | 0.030106031 |
| ENSG00000188958 | 0.086096316 | 0.122524282 | 0.111064579 | 0.100580614 |
| ENSG00000104728 | 0.036782637 | 0.030000279 | 0.034701697 | 0.024927073 |
| ENSG00000137507 | 0.081446342 | 0.064017943 | 0.067036567 | 0.060941223 |
| ENSG00000111249 | 0.015409007 | 0.024498673 | 0.024980341 | 0.014087046 |
| ENSG00000074219 | 0.033656463 | 0.035695445 | 0.0380475   | 0.033278596 |
| ENSG00000114999 | 0.015451579 | 0.025302168 | 0.024748058 | 0.015766189 |

|                 |             |             |             |             |
|-----------------|-------------|-------------|-------------|-------------|
| ENSG0000020444  | 0.035456787 | 0.034041074 | 0.033819896 | 0.022601078 |
| ENSG00000095906 | 0.032798517 | 0.036091022 | 0.03189814  | 0.022164022 |
| ENSG00000134061 | 0.031645718 | 0.042254635 | 0.043630623 | 0.035460231 |
| ENSG00000113083 | 0.018915663 | 0.028202208 | 0.026231509 | 0.01593719  |
| ENSG00000150773 | 0.022590658 | 0.02945509  | 0.027542337 | 0.022936244 |
| ENSG00000186652 | 0.055326628 | 0.056126898 | 0.044822426 | 0.051066637 |
| ENSG00000144357 | 0.02965787  | 0.031830766 | 0.036664416 | 0.02893884  |
| ENSG00000180801 | 0.018076446 | 0.026054092 | 0.02655611  | 0.017600836 |
| ENSG00000100364 | 0.046337899 | 0.049150368 | 0.047939744 | 0.039387679 |
| ENSG00000120662 | 0.0269689   | 0.032701592 | 0.030207276 | 0.019691112 |
| ENSG00000173261 | 0.016747781 | 0.025994362 | 0.025477575 | 0.016719085 |
| ENSG00000181031 | 0.072088608 | 0.045146014 | 0.043949978 | 0.037061613 |
| ENSG00000165349 | 0.016113625 | 0.027362768 | 0.024193402 | 0.016664185 |
| ENSG00000108272 | 0.029660792 | 0.034112302 | 0.032084569 | 0.022429521 |
| ENSG00000085832 | 0.028584046 | 0.032198752 | 0.030640569 | 0.024650578 |
| ENSG00000198846 | 0.07177868  | 0.072365972 | 0.058835085 | 0.07624414  |
| ENSG00000076706 | 0.017023093 | 0.026331249 | 0.026113297 | 0.017781461 |
| ENSG00000173093 | 0.015713265 | 0.025366603 | 0.025635946 | 0.015745488 |
| ENSG00000105223 | 0.028901353 | 0.029245063 | 0.035673428 | 0.033740412 |
| ENSG00000100802 | 0.036382573 | 0.040549269 | 0.036970699 | 0.029813099 |
| ENSG00000125864 | 0.019331326 | 0.027331334 | 0.02643153  | 0.017356563 |
| ENSG00000149231 | 0.048814545 | 0.047424852 | 0.038950342 | 0.066518571 |
| ENSG00000168243 | 0.016550813 | 0.024672225 | 0.025056383 | 0.015788584 |
| ENSG00000186376 | 0.023779826 | 0.032421692 | 0.026906762 | 0.022762178 |
| ENSG00000147905 | 0.038056111 | 0.037584194 | 0.034809959 | 0.038130016 |
| ENSG00000102125 | 0.024630938 | 0.028711057 | 0.031082273 | 0.023924361 |
| ENSG00000072832 | 0.019274132 | 0.026547215 | 0.026752955 | 0.016748545 |
| ENSG00000105656 | 0.020472654 | 0.03092817  | 0.029095344 | 0.025051343 |
| ENSG00000170515 | 0.022593207 | 0.02650688  | 0.026570117 | 0.023024833 |
| ENSG00000162366 | 0.014878642 | 0.025642964 | 0.025302907 | 0.015289397 |
| ENSG00000204590 | 0.019796306 | 0.028346872 | 0.02871535  | 0.018659277 |
| ENSG00000164283 | 0.015245824 | 0.024784427 | 0.024753283 | 0.014721367 |
| ENSG00000188037 | 0.016428543 | 0.025842387 | 0.025868814 | 0.016257082 |
| ENSG00000183032 | 0.018479263 | 0.025512207 | 0.025978887 | 0.015524974 |
| ENSG00000167910 | 0.015390404 | 0.024462773 | 0.024587402 | 0.015950331 |
| ENSG00000143753 | 0.039956145 | 0.038269619 | 0.037637579 | 0.027798429 |
| ENSG00000136631 | 0.031945882 | 0.038104739 | 0.032045658 | 0.028974155 |
| ENSG00000169105 | 0.022923717 | 0.029860341 | 0.027354404 | 0.022495396 |
| ENSG00000110328 | 0.05601145  | 0.051165187 | 0.046238567 | 0.045789003 |
| ENSG00000137872 | 0.016839649 | 0.025706979 | 0.026064792 | 0.016152714 |
| ENSG00000166860 | 0.02445106  | 0.034593481 | 0.031727312 | 0.019208742 |
| ENSG00000225830 | 0.021477596 | 0.027967437 | 0.026699843 | 0.017043956 |
| ENSG00000164011 | 0.027753719 | 0.036837062 | 0.029418443 | 0.025431794 |
| ENSG00000184602 | 0.065247548 | 0.071908332 | 0.05957631  | 0.068191744 |
| ENSG00000173214 | 0.021565365 | 0.02948256  | 0.026872362 | 0.022177725 |
| ENSG00000196408 | 0.021377462 | 0.034322305 | 0.030043555 | 0.020129604 |
| ENSG00000114491 | 0.028550033 | 0.032476299 | 0.028417944 | 0.02241656  |
| ENSG00000080822 | 0.021400007 | 0.028736473 | 0.028895008 | 0.020844003 |
| ENSG00000170456 | 0.055367636 | 0.045139683 | 0.053059567 | 0.051082891 |
| ENSG00000121236 | 0.073188688 | 0.055617166 | 0.046252506 | 0.0625385   |
| ENSG00000198908 | 0.05682207  | 0.041267352 | 0.035523794 | 0.038175531 |
| ENSG00000072756 | 0.032416967 | 0.039053377 | 0.030148624 | 0.034282125 |
| ENSG00000145808 | 0.016877559 | 0.024675208 | 0.024854111 | 0.018238561 |
| ENSG00000110347 | 0.018054654 | 0.026800323 | 0.026316643 | 0.017761829 |

|                 |             |             |             |             |
|-----------------|-------------|-------------|-------------|-------------|
| ENSG00000103710 | 0.01501547  | 0.023798264 | 0.024343849 | 0.015632171 |
| ENSG00000122735 | 0.015596947 | 0.025418635 | 0.024308597 | 0.017020281 |
| ENSG00000088386 | 0.016077189 | 0.025084339 | 0.024352565 | 0.013831703 |
| ENSG00000186009 | 0.033557337 | 0.033656368 | 0.028652643 | 0.019246194 |
| ENSG00000091986 | 0.01557377  | 0.025239307 | 0.025259322 | 0.014731598 |
| ENSG00000140691 | 0.038112615 | 0.039222199 | 0.056865949 | 0.040745948 |
| ENSG00000176435 | 0.014873759 | 0.023772976 | 0.025601973 | 0.015463119 |
| ENSG00000213145 | 0.049999862 | 0.042196742 | 0.03912911  | 0.040224362 |
| ENSG00000177602 | 0.050798757 | 0.043121879 | 0.045859019 | 0.040963499 |
| ENSG00000158828 | 0.04420453  | 0.03992408  | 0.038466192 | 0.038167435 |
| ENSG00000108848 | 0.05002422  | 0.047013231 | 0.03775017  | 0.053734689 |
| ENSG00000107789 | 0.036821011 | 0.040581732 | 0.030628052 | 0.02895661  |
| ENSG00000104760 | 0.015730037 | 0.025089692 | 0.026165649 | 0.016338051 |
| ENSG00000101361 | 0.041414659 | 0.038290363 | 0.038386141 | 0.038225416 |
| ENSG00000179344 | 0.032479429 | 0.041649824 | 0.04263354  | 0.040339939 |
| ENSG00000116574 | 0.091435707 | 0.078762766 | 0.070921005 | 0.084641142 |
| ENSG00000169251 | 0.044649856 | 0.048476716 | 0.041182755 | 0.038786507 |
| ENSG00000136235 | 0.057977132 | 0.054361323 | 0.053476396 | 0.050177271 |
| ENSG00000107968 | 0.042769814 | 0.042872246 | 0.047819146 | 0.049305631 |
| ENSG00000085511 | 0.035796591 | 0.040762576 | 0.036076828 | 0.031550602 |
| ENSG00000167397 | 0.028853094 | 0.027342708 | 0.030254006 | 0.023776199 |
| ENSG00000173193 | 0.035186041 | 0.036162463 | 0.038036723 | 0.03545583  |
| ENSG00000164645 | 0.017694623 | 0.027137337 | 0.025436076 | 0.018704345 |
| ENSG00000160856 | 0.018911395 | 0.02768298  | 0.028649209 | 0.02670794  |
| ENSG00000018510 | 0.035545166 | 0.037734904 | 0.032112992 | 0.024921252 |
| ENSG00000075391 | 0.020963417 | 0.025197381 | 0.025969863 | 0.015474459 |
| ENSG00000143862 | 0.020551126 | 0.027444427 | 0.027989962 | 0.021780385 |
| ENSG00000117450 | 0.021458078 | 0.026419322 | 0.027215165 | 0.019048721 |
| ENSG00000143771 | 0.02547637  | 0.028528731 | 0.028613576 | 0.021583168 |
| ENSG00000187514 | 0.022626496 | 0.027602494 | 0.026285204 | 0.017754692 |
| ENSG00000126545 | 0.017973313 | 0.025547607 | 0.027518448 | 0.017488904 |
| ENSG00000109079 | 0.023101559 | 0.031406089 | 0.030854078 | 0.023421455 |
| ENSG00000138347 | 0.015001957 | 0.024914338 | 0.024681593 | 0.014412754 |
| ENSG00000153066 | 0.048004957 | 0.038572253 | 0.048624495 | 0.045624082 |
| ENSG00000153162 | 0.056651448 | 0.062741016 | 0.05344526  | 0.063977371 |
| ENSG00000171102 | 0.016547649 | 0.024961089 | 0.02645885  | 0.015711412 |
| ENSG00000139116 | 0.044054714 | 0.076305913 | 0.072509568 | 0.067690738 |
| ENSG00000115825 | 0.048743852 | 0.044729004 | 0.043296034 | 0.042400816 |
| ENSG00000116874 | 0.036481531 | 0.040075089 | 0.034566909 | 0.0292589   |
| ENSG00000151948 | 0.144280788 | 0.110986295 | 0.096545868 | 0.105615534 |
| ENSG00000129187 | 0.029941578 | 0.039227149 | 0.036131819 | 0.02933436  |
| ENSG00000119888 | 0.041751279 | 0.039321774 | 0.035214362 | 0.028520008 |
| ENSG00000180089 | 0.021255085 | 0.028306466 | 0.02759357  | 0.021284869 |
| ENSG00000174791 | 0.01529419  | 0.025618355 | 0.02398392  | 0.015786313 |
| ENSG00000120055 | 0.015134131 | 0.024337768 | 0.025108919 | 0.01459952  |
| ENSG00000070729 | 0.014982741 | 0.025508051 | 0.025839554 | 0.015731546 |
| ENSG00000102879 | 0.034428228 | 0.030687744 | 0.031737927 | 0.030826624 |
| ENSG00000183640 | 0.017388837 | 0.027623506 | 0.026875243 | 0.016991029 |
| ENSG00000240857 | 0.029899653 | 0.036181324 | 0.03406073  | 0.0268481   |
| ENSG00000121481 | 0.015532444 | 0.024682317 | 0.026333564 | 0.015731587 |
| ENSG00000154309 | 0.019341105 | 0.027209783 | 0.025416244 | 0.018470335 |
| ENSG00000144452 | 0.025405453 | 0.026562824 | 0.027413572 | 0.017649702 |
| ENSG00000104381 | 0.021449487 | 0.025515057 | 0.026445921 | 0.017770692 |
| ENSG00000122145 | 0.016886752 | 0.025481346 | 0.024840249 | 0.015355767 |

|                 |             |             |             |             |
|-----------------|-------------|-------------|-------------|-------------|
| ENSG00000129295 | 0.016346521 | 0.0256046   | 0.024784404 | 0.014878552 |
| ENSG00000133328 | 0.053697306 | 0.049160753 | 0.045069867 | 0.051819284 |
| ENSG00000125834 | 0.02493561  | 0.030656101 | 0.031063918 | 0.024105906 |
| ENSG00000174442 | 0.045491772 | 0.045976937 | 0.036783462 | 0.039950819 |
| ENSG00000130226 | 0.01591404  | 0.024781019 | 0.025852906 | 0.014391719 |
| ENSG00000153404 | 0.016738961 | 0.025746538 | 0.025776747 | 0.015296108 |
| ENSG00000171100 | 0.037323912 | 0.03631559  | 0.037054607 | 0.037040021 |
| ENSG00000095015 | 0.048936486 | 0.044889846 | 0.036117884 | 0.033495506 |
| ENSG00000162630 | 0.016731151 | 0.02572855  | 0.025018771 | 0.015258266 |
| ENSG00000172399 | 0.016632052 | 0.026003109 | 0.025235061 | 0.016099172 |
| ENSG00000180806 | 0.017646751 | 0.024476153 | 0.025711925 | 0.016172069 |
| ENSG00000151704 | 0.018184874 | 0.024811462 | 0.026615755 | 0.018584762 |
| ENSG00000244355 | 0.015113242 | 0.025280297 | 0.025598023 | 0.015136529 |
| ENSG00000172269 | 0.040350589 | 0.042430752 | 0.033966379 | 0.03326849  |
| ENSG00000160401 | 0.016106464 | 0.024795893 | 0.026667124 | 0.015271953 |
| ENSG00000140660 | 0.038341974 | 0.039082784 | 0.039957724 | 0.033930784 |
| ENSG00000163735 | 0.017523756 | 0.026166218 | 0.025415914 | 0.015727829 |
| ENSG00000213024 | 0.024520183 | 0.027456999 | 0.030178248 | 0.028037825 |
| ENSG00000125037 | 0.02344318  | 0.029063253 | 0.03240636  | 0.020630996 |
| ENSG00000147647 | 0.035793857 | 0.027332637 | 0.025453929 | 0.032663988 |
| ENSG00000092068 | 0.015508515 | 0.024652951 | 0.024998719 | 0.015861943 |
| ENSG00000164978 | 0.051800806 | 0.072810461 | 0.089024753 | 0.05154294  |
| ENSG00000159459 | 0.02381761  | 0.031302302 | 0.034002234 | 0.023669746 |
| ENSG00000197043 | 0.028731678 | 0.033924877 | 0.033281678 | 0.02699326  |
| ENSG00000171777 | 0.017249453 | 0.025552414 | 0.025188049 | 0.015221325 |
| ENSG00000022567 | 0.020568192 | 0.027359746 | 0.026779928 | 0.019929192 |
| ENSG00000165474 | 0.07385993  | 0.046055186 | 0.043157974 | 0.063158664 |
| ENSG00000162391 | 0.017140125 | 0.02593036  | 0.025627218 | 0.017292229 |
| ENSG00000182816 | 0.016052598 | 0.024783183 | 0.024117047 | 0.015486682 |
| ENSG00000117281 | 0.017951153 | 0.028386649 | 0.026191415 | 0.018769601 |
| ENSG00000180008 | 0.019503856 | 0.025266921 | 0.026648014 | 0.016096602 |
| ENSG00000196743 | 0.046597259 | 0.037313842 | 0.043735726 | 0.052908152 |
| ENSG00000111445 | 0.038701364 | 0.033261895 | 0.031861059 | 0.029732037 |
| ENSG00000132915 | 0.015927685 | 0.025676787 | 0.024765355 | 0.015818576 |
| ENSG00000072315 | 0.017045947 | 0.025642766 | 0.02802715  | 0.016901095 |
| ENSG00000153012 | 0.015672678 | 0.02477682  | 0.024027284 | 0.014501211 |
| ENSG00000104863 | 0.020855354 | 0.027127218 | 0.028794046 | 0.024482928 |
| ENSG00000198925 | 0.023759108 | 0.031646782 | 0.031635321 | 0.031072282 |
| ENSG00000178718 | 0.047858401 | 0.045034638 | 0.04602024  | 0.045366533 |
| ENSG00000109919 | 0.029380611 | 0.035596445 | 0.029725251 | 0.025430618 |
| ENSG00000154832 | 0.041190614 | 0.03794023  | 0.042536039 | 0.042640074 |
| ENSG00000170522 | 0.059545527 | 0.051110429 | 0.0445529   | 0.03937013  |
| ENSG00000139549 | 0.015794616 | 0.025120469 | 0.0252854   | 0.01529958  |
| ENSG00000105568 | 0.019064509 | 0.026767334 | 0.030299261 | 0.019403314 |
| ENSG00000204873 | 0.017467124 | 0.02699434  | 0.026736344 | 0.016547316 |
| ENSG00000123066 | 0.063171614 | 0.072869979 | 0.071884893 | 0.069257429 |
| ENSG00000172830 | 0.016180824 | 0.024853426 | 0.024282717 | 0.014533799 |
| ENSG00000100575 | 0.022123222 | 0.030019751 | 0.030284135 | 0.023293217 |
| ENSG00000196865 | 0.026367053 | 0.033328063 | 0.026842654 | 0.052643247 |
| ENSG00000099338 | 0.016331953 | 0.027045767 | 0.023953992 | 0.014458506 |
| ENSG00000125901 | 0.028835346 | 0.027637257 | 0.029284804 | 0.021209998 |
| ENSG00000171056 | 0.015122415 | 0.025760042 | 0.026081128 | 0.014570135 |
| ENSG00000169750 | 0.030584385 | 0.0315838   | 0.031624954 | 0.02669716  |
| ENSG00000171794 | 0.015457062 | 0.025290473 | 0.024379826 | 0.020864711 |



|                 |             |             |             |             |
|-----------------|-------------|-------------|-------------|-------------|
| ENSG00000154764 | 0.017285017 | 0.026311959 | 0.026419935 | 0.01698993  |
| ENSG00000123411 | 0.021258316 | 0.027228646 | 0.02770619  | 0.020039485 |
| ENSG00000145687 | 0.027340559 | 0.037822933 | 0.040509952 | 0.029768029 |
| ENSG00000123154 | 0.024077704 | 0.029973549 | 0.03013066  | 0.022863782 |
| ENSG00000131899 | 0.015030881 | 0.025077402 | 0.02544104  | 0.015835204 |
| ENSG00000095981 | 0.014980074 | 0.025753184 | 0.025098073 | 0.015438689 |
| ENSG00000167971 | 0.015982674 | 0.025033902 | 0.024452838 | 0.01535671  |
| ENSG00000132517 | 0.017358814 | 0.026111723 | 0.025444072 | 0.016879646 |
| ENSG00000113812 | 0.033224187 | 0.039585363 | 0.033204777 | 0.032430827 |
| ENSG00000218891 | 0.029865204 | 0.029018252 | 0.032577152 | 0.02738417  |
| ENSG00000101997 | 0.020722681 | 0.02898196  | 0.029788324 | 0.025612494 |
| ENSG00000182195 | 0.024787728 | 0.029484361 | 0.029935344 | 0.024820484 |
| ENSG00000107159 | 0.037508277 | 0.043754454 | 0.049699338 | 0.033110208 |
| ENSG00000185519 | 0.01855591  | 0.026997307 | 0.02532878  | 0.018085347 |
| ENSG00000147481 | 0.015546312 | 0.025763264 | 0.024843863 | 0.015584008 |
| ENSG00000198824 | 0.036641276 | 0.035842654 | 0.043181145 | 0.031856224 |
| ENSG00000100060 | 0.027379023 | 0.033673506 | 0.035343542 | 0.026426423 |
| ENSG00000165724 | 0.036595019 | 0.035916801 | 0.039502802 | 0.031397393 |
| ENSG00000136869 | 0.018440425 | 0.025399976 | 0.02658146  | 0.01759618  |
| ENSG00000183303 | 0.015420348 | 0.025264419 | 0.0246053   | 0.015999351 |
| ENSG00000127586 | 0.04983563  | 0.051852805 | 0.043915011 | 0.033103018 |
| ENSG00000149084 | 0.026891073 | 0.030390811 | 0.029466012 | 0.026590073 |
| ENSG00000157358 | 0.026531009 | 0.026396712 | 0.028077851 | 0.015661079 |
| ENSG00000135900 | 0.027617575 | 0.035748107 | 0.033158177 | 0.02397848  |
| ENSG00000170961 | 0.016650107 | 0.026886581 | 0.024887674 | 0.016960524 |
| ENSG00000170100 | 0.016826238 | 0.026492072 | 0.026688529 | 0.017244845 |
| ENSG00000086015 | 0.031291877 | 0.034769414 | 0.030790367 | 0.027221489 |
| ENSG00000114779 | 0.029213024 | 0.028893672 | 0.032667384 | 0.032376671 |
| ENSG00000151617 | 0.059888089 | 0.032225288 | 0.026109359 | 0.033549286 |
| ENSG00000203747 | 0.016062666 | 0.024695366 | 0.025797945 | 0.015426417 |
| ENSG00000182858 | 0.023766457 | 0.027658682 | 0.033887108 | 0.025618956 |
| ENSG00000100578 | 0.03704759  | 0.03919291  | 0.03096319  | 0.024796773 |
| ENSG00000179456 | 0.017261348 | 0.025668114 | 0.024733819 | 0.015232167 |
| ENSG00000182378 | 0.063623215 | 0.053200847 | 0.046188117 | 0.04465017  |
| ENSG00000105619 | 0.023297545 | 0.028144675 | 0.029646412 | 0.025666678 |
| ENSG00000237649 | 0.047695294 | 0.036491824 | 0.03527599  | 0.035150224 |
| ENSG00000214107 | 0.014820969 | 0.025827506 | 0.024363502 | 0.015614691 |
| ENSG00000100024 | 0.063962154 | 0.05501916  | 0.051831498 | 0.059178224 |
| ENSG00000184155 | 0.016194082 | 0.025246172 | 0.024544748 | 0.015219571 |
| ENSG00000158773 | 0.03624152  | 0.037445782 | 0.039367163 | 0.035711648 |
| ENSG00000167554 | 0.021518847 | 0.035837681 | 0.026127755 | 0.019138553 |
| ENSG00000117425 | 0.015193624 | 0.025444196 | 0.024880176 | 0.015608046 |
| ENSG00000104231 | 0.026874291 | 0.033560241 | 0.031697719 | 0.022890845 |
| ENSG00000204897 | 0.016203389 | 0.025597413 | 0.024420171 | 0.016335082 |
| ENSG00000188095 | 0.017253232 | 0.026650247 | 0.027726496 | 0.015525524 |
| ENSG00000124198 | 0.035333366 | 0.036894479 | 0.039440399 | 0.034664198 |
| ENSG00000115841 | 0.017646318 | 0.027499868 | 0.027514339 | 0.017452676 |
| ENSG00000147571 | 0.016723068 | 0.026189288 | 0.026340815 | 0.017310625 |
| ENSG00000159714 | 0.018708606 | 0.026132287 | 0.026562396 | 0.018009004 |
| ENSG00000116128 | 0.02592784  | 0.033919104 | 0.033327933 | 0.024142376 |
| ENSG00000122591 | 0.018810105 | 0.025689374 | 0.029746416 | 0.017405583 |
| ENSG00000167977 | 0.023497076 | 0.027797505 | 0.03073278  | 0.023879086 |
| ENSG00000035862 | 0.018274505 | 0.030294459 | 0.035037854 | 0.02147578  |
| ENSG00000179111 | 0.029889465 | 0.038615184 | 0.040117844 | 0.037856174 |

|                 |             |             |             |             |
|-----------------|-------------|-------------|-------------|-------------|
| ENSG00000104218 | 0.034448593 | 0.033697356 | 0.0302111   | 0.031798794 |
| ENSG00000111077 | 0.015471045 | 0.024700816 | 0.024859217 | 0.015395874 |
| ENSG00000159884 | 0.033622564 | 0.038806729 | 0.035128464 | 0.032894273 |
| ENSG00000130701 | 0.020305715 | 0.02731711  | 0.02751799  | 0.020322314 |
| ENSG00000081853 | 0.016147717 | 0.02655432  | 0.025225469 | 0.015329684 |
| ENSG00000134470 | 0.015729721 | 0.025486914 | 0.027845809 | 0.015466093 |
| ENSG00000088035 | 0.03696295  | 0.03848984  | 0.034805495 | 0.026659837 |
| ENSG00000100219 | 0.045830491 | 0.042611797 | 0.042930652 | 0.041839884 |
| ENSG00000161180 | 0.017416521 | 0.026828748 | 0.026850161 | 0.016982672 |
| ENSG00000180190 | 0.016323966 | 0.025608846 | 0.02499296  | 0.014830348 |
| ENSG00000118520 | 0.015814731 | 0.025086652 | 0.024480538 | 0.015535084 |
| ENSG00000172458 | 0.029772912 | 0.029743992 | 0.028884026 | 0.025750978 |
| ENSG00000120705 | 0.031301776 | 0.034980585 | 0.032367708 | 0.030685526 |
| ENSG00000101182 | 0.019164406 | 0.026496115 | 0.025057091 | 0.01984892  |
| ENSG00000093010 | 0.025470625 | 0.032231417 | 0.032232489 | 0.033099121 |
| ENSG00000129515 | 0.026684819 | 0.031535835 | 0.033043806 | 0.023711963 |
| ENSG00000127533 | 0.016130016 | 0.025379419 | 0.026385074 | 0.016947584 |
| ENSG00000119929 | 0.028439288 | 0.030997752 | 0.034920917 | 0.02299016  |
| ENSG00000168883 | 0.027046569 | 0.031828131 | 0.032101372 | 0.023817196 |
| ENSG00000125977 | 0.020166344 | 0.027983293 | 0.027001636 | 0.018891332 |
| ENSG00000175315 | 0.017472204 | 0.026729231 | 0.026073978 | 0.016087619 |
| ENSG00000186352 | 0.087022946 | 0.066395841 | 0.079007068 | 0.072078359 |
| ENSG00000141668 | 0.023475814 | 0.024776486 | 0.02658666  | 0.016547486 |
| ENSG00000078304 | 0.01814214  | 0.026953114 | 0.024791347 | 0.015522663 |
| ENSG00000178381 | 0.037754716 | 0.03589921  | 0.037822132 | 0.029028704 |
| ENSG00000154114 | 0.037087175 | 0.038678426 | 0.035169699 | 0.033063016 |
| ENSG00000197081 | 0.032544778 | 0.03948857  | 0.039053345 | 0.034400553 |
| ENSG00000112599 | 0.015806941 | 0.026343386 | 0.025886029 | 0.018665398 |
| ENSG00000167769 | 0.014969477 | 0.025547586 | 0.025593591 | 0.01523014  |
| ENSG00000101901 | 0.03986304  | 0.044647637 | 0.051147374 | 0.037899533 |
| ENSG00000179178 | 0.016227673 | 0.025922762 | 0.026532075 | 0.01655444  |
| ENSG00000068615 | 0.033034954 | 0.02816078  | 0.025020891 | 0.022843182 |
| ENSG00000122877 | 0.072985541 | 0.053319986 | 0.054095609 | 0.060073974 |
| ENSG00000163486 | 0.043963174 | 0.037415374 | 0.038597238 | 0.038892465 |
| ENSG00000078246 | 0.016576462 | 0.025381933 | 0.025770493 | 0.015163322 |
| ENSG00000166169 | 0.02360263  | 0.027757232 | 0.031011229 | 0.027834507 |
| ENSG00000133561 | 0.101638319 | 0.075834299 | 0.08164734  | 0.090417972 |
| ENSG00000167685 | 0.023480953 | 0.029972657 | 0.028405372 | 0.022329961 |
| ENSG00000027075 | 0.137717885 | 0.107238396 | 0.117988824 | 0.133605871 |
| ENSG00000180817 | 0.018523617 | 0.026781466 | 0.026476126 | 0.018620997 |
| ENSG00000188026 | 0.017682883 | 0.026608167 | 0.02545192  | 0.016825058 |
| ENSG00000111737 | 0.033046353 | 0.03934554  | 0.039282495 | 0.034566366 |
| ENSG00000167720 | 0.038663878 | 0.040361229 | 0.032808689 | 0.029845835 |
| ENSG00000169564 | 0.020450229 | 0.027597315 | 0.025376927 | 0.016104102 |
| ENSG00000196653 | 0.075381639 | 0.066476922 | 0.071559938 | 0.048480363 |
| ENSG00000125954 | 0.034145283 | 0.03862297  | 0.033817132 | 0.023832811 |
| ENSG00000185010 | 0.019764136 | 0.026938132 | 0.02564801  | 0.018073056 |
| ENSG00000121005 | 0.015444504 | 0.025972853 | 0.024172049 | 0.014646013 |
| ENSG00000188001 | 0.093128849 | 0.072657738 | 0.05345026  | 0.075254844 |
| ENSG00000097021 | 0.060833949 | 0.043188078 | 0.045230379 | 0.060585189 |
| ENSG00000169174 | 0.015035691 | 0.024597862 | 0.025078324 | 0.014982319 |
| ENSG00000102287 | 0.018040648 | 0.02425222  | 0.025216354 | 0.016852788 |
| ENSG00000111181 | 0.021715112 | 0.02715735  | 0.025188506 | 0.016485947 |
| ENSG00000132164 | 0.016152222 | 0.026110449 | 0.025560972 | 0.014687767 |

|                 |             |             |             |             |
|-----------------|-------------|-------------|-------------|-------------|
| ENSG00000134758 | 0.034960551 | 0.040887215 | 0.038663937 | 0.035590793 |
| ENSG00000140367 | 0.032179705 | 0.035247432 | 0.035278964 | 0.028140219 |
| ENSG00000165197 | 0.016509412 | 0.02524501  | 0.026609065 | 0.016034603 |
| ENSG00000106263 | 0.034624825 | 0.026978463 | 0.030389457 | 0.028196468 |
| ENSG00000120451 | 0.026955629 | 0.035963351 | 0.028359331 | 0.025986425 |
| ENSG00000055163 | 0.026790051 | 0.031346597 | 0.031208997 | 0.035031648 |
| ENSG00000100911 | 0.026511491 | 0.033300641 | 0.03036438  | 0.024227119 |
| ENSG00000134684 | 0.023391408 | 0.028853522 | 0.029719727 | 0.021883785 |
| ENSG00000172748 | 0.020810603 | 0.029302277 | 0.028478946 | 0.019119135 |
| ENSG00000108187 | 0.038821141 | 0.037837266 | 0.034454496 | 0.036609487 |
| ENSG00000117133 | 0.02823265  | 0.032035266 | 0.033632895 | 0.029549398 |
| ENSG00000183020 | 0.024709546 | 0.033993141 | 0.031704702 | 0.023681345 |
| ENSG00000171459 | 0.013128741 | 0.023511326 | 0.02384858  | 0.012890179 |
| ENSG00000136156 | 0.062432475 | 0.055571255 | 0.052035147 | 0.040912056 |
| ENSG00000167080 | 0.020492264 | 0.025585003 | 0.025469634 | 0.018174112 |
| ENSG00000176160 | 0.040356418 | 0.033425178 | 0.030065738 | 0.029288757 |
| ENSG00000171044 | 0.017923935 | 0.025773159 | 0.024447467 | 0.015611225 |
| ENSG00000104419 | 0.109936616 | 0.103773912 | 0.080361109 | 0.108566903 |
| ENSG00000198363 | 0.015786163 | 0.025398318 | 0.025516862 | 0.016036377 |
| ENSG00000165501 | 0.04178768  | 0.034927468 | 0.035257378 | 0.033476718 |
| ENSG00000127311 | 0.022392381 | 0.031949504 | 0.028123146 | 0.025478145 |
| ENSG00000095397 | 0.030502045 | 0.039366629 | 0.026946015 | 0.022166194 |
| ENSG00000132405 | 0.028319099 | 0.03561406  | 0.032807159 | 0.023308253 |
| ENSG00000205090 | 0.015981151 | 0.02495132  | 0.02484918  | 0.015580049 |
| ENSG00000102038 | 0.074287851 | 0.060127364 | 0.034989733 | 0.046250535 |
| ENSG00000105146 | 0.022202486 | 0.029656352 | 0.033722732 | 0.023167165 |
| ENSG00000180263 | 0.060696168 | 0.057720934 | 0.058647474 | 0.049400895 |
| ENSG00000079432 | 0.023184144 | 0.031508381 | 0.033188008 | 0.02536399  |
| ENSG00000144771 | 0.016077443 | 0.024590525 | 0.024597546 | 0.016171485 |
| ENSG00000206073 | 0.017675371 | 0.025385738 | 0.026563607 | 0.017071202 |
| ENSG00000136839 | 0.018129031 | 0.027038938 | 0.025759043 | 0.015956527 |
| ENSG00000222004 | 0.015445409 | 0.025621455 | 0.025396764 | 0.014984261 |
| ENSG00000113600 | 0.01603131  | 0.024593071 | 0.024563625 | 0.015754967 |
| ENSG00000196811 | 0.016025873 | 0.024930967 | 0.024378753 | 0.015909434 |
| ENSG00000095002 | 0.040931373 | 0.040780892 | 0.032530921 | 0.037305256 |
| ENSG00000156150 | 0.015715822 | 0.026226371 | 0.024362233 | 0.015394175 |
| ENSG00000151148 | 0.031109909 | 0.037950558 | 0.030599375 | 0.026107419 |
| ENSG00000110442 | 0.024849825 | 0.030316852 | 0.033910154 | 0.029581931 |
| ENSG00000143119 | 0.022569418 | 0.033629726 | 0.032169899 | 0.025274549 |
| ENSG00000175920 | 0.016903586 | 0.025232291 | 0.02501253  | 0.016553309 |
| ENSG00000104435 | 0.016450372 | 0.025049761 | 0.025078772 | 0.01647338  |
| ENSG00000169918 | 0.030898027 | 0.033302583 | 0.031281343 | 0.028206365 |
| ENSG00000141433 | 0.016119464 | 0.027201562 | 0.025213284 | 0.015136571 |
| ENSG00000062096 | 0.015604095 | 0.026429735 | 0.024429667 | 0.016159272 |
| ENSG00000146425 | 0.034908939 | 0.038360226 | 0.041307255 | 0.032987593 |
| ENSG00000131849 | 0.042420288 | 0.033275719 | 0.033073804 | 0.025669182 |
| ENSG00000121905 | 0.015330647 | 0.025653294 | 0.024053564 | 0.014615147 |
| ENSG00000176182 | 0.028715559 | 0.035424637 | 0.030389946 | 0.024621579 |
| ENSG00000197841 | 0.023762716 | 0.028253298 | 0.026080315 | 0.019209576 |
| ENSG00000161405 | 0.033930005 | 0.041869139 | 0.038092958 | 0.035880354 |
| ENSG00000148935 | 0.105194883 | 0.074277212 | 0.083716067 | 0.093052119 |
| ENSG00000165802 | 0.01456605  | 0.025996533 | 0.025288586 | 0.014972778 |
| ENSG00000019505 | 0.015111088 | 0.024737502 | 0.024124859 | 0.014602049 |
| ENSG00000230989 | 0.029413851 | 0.030887488 | 0.030483156 | 0.021546    |

|                 |             |             |             |             |
|-----------------|-------------|-------------|-------------|-------------|
| ENSG00000204252 | 0.042170721 | 0.048249746 | 0.036410767 | 0.065030623 |
| ENSG00000124216 | 0.015546082 | 0.024885098 | 0.025082332 | 0.016472772 |
| ENSG00000181027 | 0.032002832 | 0.038530177 | 0.04315124  | 0.035034324 |
| ENSG00000198851 | 0.066998058 | 0.044743009 | 0.032803721 | 0.055092847 |
| ENSG00000067560 | 0.018054421 | 0.027160602 | 0.026587944 | 0.017845231 |
| ENSG00000103111 | 0.031764112 | 0.037916682 | 0.03780385  | 0.033251407 |
| ENSG00000118322 | 0.015958268 | 0.024831083 | 0.024746356 | 0.016248063 |
| ENSG00000172000 | 0.016955871 | 0.025198018 | 0.024945424 | 0.015825082 |
| ENSG00000176732 | 0.029847445 | 0.030780339 | 0.029879592 | 0.020198946 |
| ENSG00000196632 | 0.017418913 | 0.025653973 | 0.026384229 | 0.015494289 |
| ENSG00000155016 | 0.043917558 | 0.04072831  | 0.038641257 | 0.039227785 |
| ENSG00000224201 | 0.019772162 | 0.025807651 | 0.025993083 | 0.016816759 |
| ENSG00000079393 | 0.022750571 | 0.027969634 | 0.029472172 | 0.018701287 |
| ENSG00000156206 | 0.015452579 | 0.024668782 | 0.025201067 | 0.015022628 |
| ENSG00000137494 | 0.019255701 | 0.025774088 | 0.025480984 | 0.018955301 |
| ENSG00000162885 | 0.021595819 | 0.027230043 | 0.027897618 | 0.019777442 |
| ENSG00000186190 | 0.015999107 | 0.02416372  | 0.024590287 | 0.014919207 |
| ENSG00000142453 | 0.024188959 | 0.028103291 | 0.030244461 | 0.022799724 |
| ENSG00000107104 | 0.014061763 | 0.02508967  | 0.024434388 | 0.016138904 |
| ENSG00000227345 | 0.030887699 | 0.040435598 | 0.03017451  | 0.022906668 |
| ENSG00000129151 | 0.046461126 | 0.027447326 | 0.02553978  | 0.019834175 |
| ENSG00000137500 | 0.027813315 | 0.031663979 | 0.027923942 | 0.018655491 |
| ENSG00000085719 | 0.025862699 | 0.032401314 | 0.031636505 | 0.023479124 |
| ENSG00000154813 | 0.030453707 | 0.034337517 | 0.037804301 | 0.030747218 |
| ENSG00000132661 | 0.0309391   | 0.039617804 | 0.041523233 | 0.027901655 |
| ENSG00000165006 | 0.022823377 | 0.032280504 | 0.03705005  | 0.018096948 |
| ENSG00000160182 | 0.018233573 | 0.026687121 | 0.026233822 | 0.015971747 |
| ENSG00000168303 | 0.0232223   | 0.028964968 | 0.029549058 | 0.019500899 |
| ENSG00000169297 | 0.016750637 | 0.025884189 | 0.024586044 | 0.016141087 |
| ENSG00000155659 | 0.017379558 | 0.025572332 | 0.026431839 | 0.017122745 |
| ENSG00000105700 | 0.021199539 | 0.027379887 | 0.030252036 | 0.021387156 |
| ENSG00000155380 | 0.042027513 | 0.052505012 | 0.04425277  | 0.076327804 |
| ENSG00000163586 | 0.018422958 | 0.025285971 | 0.02650427  | 0.01593942  |
| ENSG00000158301 | 0.033570389 | 0.033371759 | 0.032580824 | 0.026216572 |
| ENSG00000164117 | 0.027285884 | 0.035054023 | 0.031433923 | 0.025905789 |
| ENSG00000101335 | 0.04771224  | 0.052985732 | 0.032686077 | 0.038016896 |
| ENSG00000138092 | 0.037871949 | 0.032811263 | 0.034360053 | 0.02609292  |
| ENSG00000142186 | 0.037958632 | 0.042684096 | 0.044128197 | 0.035588581 |
| ENSG00000126856 | 0.054875142 | 0.043564057 | 0.037517325 | 0.042880069 |
| ENSG00000186074 | 0.018555419 | 0.028478129 | 0.027666979 | 0.019540709 |
| ENSG00000132975 | 0.015481657 | 0.024585259 | 0.024934648 | 0.013861216 |
| ENSG00000163806 | 0.015242431 | 0.024678606 | 0.024714332 | 0.014258415 |
| ENSG00000196141 | 0.100314617 | 0.068820551 | 0.075279377 | 0.091904611 |
| ENSG00000117151 | 0.031506412 | 0.036573354 | 0.041670329 | 0.032113065 |
| ENSG00000136197 | 0.034859048 | 0.03618874  | 0.030408238 | 0.026372455 |
| ENSG00000170616 | 0.016158753 | 0.025492799 | 0.024962885 | 0.016277693 |
| ENSG00000112041 | 0.015557892 | 0.025380767 | 0.024089633 | 0.015475473 |
| ENSG00000186150 | 0.016829782 | 0.024684675 | 0.025047987 | 0.016089192 |
| ENSG00000198015 | 0.031872065 | 0.033487941 | 0.030737657 | 0.025785681 |
| ENSG00000186184 | 0.022893936 | 0.03254945  | 0.029097252 | 0.026760137 |
| ENSG00000156976 | 0.029388999 | 0.03029247  | 0.03082121  | 0.022999017 |
| ENSG00000147813 | 0.070205427 | 0.137092771 | 0.125493041 | 0.089715414 |
| ENSG00000215203 | 0.014323335 | 0.024349271 | 0.023645397 | 0.013763507 |
| ENSG00000173320 | 0.041064536 | 0.02587478  | 0.025366512 | 0.016951051 |

|                 |             |             |             |             |
|-----------------|-------------|-------------|-------------|-------------|
| ENSG00000148730 | 0.0268788   | 0.033072348 | 0.030781708 | 0.022411641 |
| ENSG00000161654 | 0.022378005 | 0.027889258 | 0.02957378  | 0.019514825 |
| ENSG00000163126 | 0.039362965 | 0.047246856 | 0.037747768 | 0.038193251 |
| ENSG00000134962 | 0.016150115 | 0.025358719 | 0.024643572 | 0.016350759 |
| ENSG00000138738 | 0.015357709 | 0.025844097 | 0.025162537 | 0.015907408 |
| ENSG00000118564 | 0.017600875 | 0.026916688 | 0.0266854   | 0.018180707 |
| ENSG00000083123 | 0.046254642 | 0.04984258  | 0.03918009  | 0.033056219 |
| ENSG00000161031 | 0.026186294 | 0.029795259 | 0.030996369 | 0.028647518 |
| ENSG00000163902 | 0.027809094 | 0.030093324 | 0.033525113 | 0.028527917 |
| ENSG00000131459 | 0.04203586  | 0.031308527 | 0.031237957 | 0.022077011 |
| ENSG00000096746 | 0.029836386 | 0.030981138 | 0.02969813  | 0.025578661 |
| ENSG00000144134 | 0.036698652 | 0.041111264 | 0.038337739 | 0.0350109   |
| ENSG00000166855 | 0.026694443 | 0.032219175 | 0.031005377 | 0.025857007 |
| ENSG00000131480 | 0.016437496 | 0.024448781 | 0.02474128  | 0.016666914 |
| ENSG00000165621 | 0.016584129 | 0.025480508 | 0.024842126 | 0.015508537 |
| ENSG00000100055 | 0.046913779 | 0.04005679  | 0.040561648 | 0.040864662 |
| ENSG00000198390 | 0.015793817 | 0.02476322  | 0.025040865 | 0.016006024 |
| ENSG00000151348 | 0.038901786 | 0.041754926 | 0.036944883 | 0.031441835 |
| ENSG00000128191 | 0.035347457 | 0.033900857 | 0.032102096 | 0.036040023 |
| ENSG00000145287 | 0.07782621  | 0.050620416 | 0.053115091 | 0.051652459 |
| ENSG00000161610 | 0.015436379 | 0.027517261 | 0.02794715  | 0.015940763 |
| ENSG00000181408 | 0.015981851 | 0.025754598 | 0.024627213 | 0.014875888 |
| ENSG00000198324 | 0.016394911 | 0.025479889 | 0.025266176 | 0.014228833 |
| ENSG00000177685 | 0.060353413 | 0.044774997 | 0.040817949 | 0.041906327 |
| ENSG00000105887 | 0.034550639 | 0.040256552 | 0.0340323   | 0.030658427 |
| ENSG00000136874 | 0.020748185 | 0.029990249 | 0.029504543 | 0.019585455 |
| ENSG00000143543 | 0.020754971 | 0.028409833 | 0.026078003 | 0.018370421 |
| ENSG00000115339 | 0.033955482 | 0.03612598  | 0.037101158 | 0.041154841 |
| ENSG00000120306 | 0.047230891 | 0.038361076 | 0.040759874 | 0.046281687 |
| ENSG00000135678 | 0.018742174 | 0.025774893 | 0.025809453 | 0.017081207 |
| ENSG00000197483 | 0.0165773   | 0.029615739 | 0.030388894 | 0.018289759 |
| ENSG00000132970 | 0.015862097 | 0.025399058 | 0.025736953 | 0.018031127 |
| ENSG00000175121 | 0.016183781 | 0.024812787 | 0.02435028  | 0.015993188 |
| ENSG00000105379 | 0.03252978  | 0.033434528 | 0.035462477 | 0.028125469 |
| ENSG00000142611 | 0.016490985 | 0.025084289 | 0.024178642 | 0.01510016  |
| ENSG00000243147 | 0.019942565 | 0.028060051 | 0.027816334 | 0.017652772 |
| ENSG00000137819 | 0.017084072 | 0.026642273 | 0.025664994 | 0.017086494 |
| ENSG00000169957 | 0.034073853 | 0.035697341 | 0.038463582 | 0.029337889 |
| ENSG00000148798 | 0.059040699 | 0.031511447 | 0.035960168 | 0.052361537 |
| ENSG00000143493 | 0.035506868 | 0.036585554 | 0.038135664 | 0.040393201 |
| ENSG00000127824 | 0.044064529 | 0.033090909 | 0.031836147 | 0.031021005 |
| ENSG00000175727 | 0.05091619  | 0.047977943 | 0.047162734 | 0.042614346 |
| ENSG00000168597 | 0.022030938 | 0.02913511  | 0.026958493 | 0.021458409 |
| ENSG00000177335 | 0.022988122 | 0.028016372 | 0.027924158 | 0.020232366 |
| ENSG00000111058 | 0.016337149 | 0.024965414 | 0.024038182 | 0.014581469 |
| ENSG00000152061 | 0.043099278 | 0.042291911 | 0.038532234 | 0.046873848 |
| ENSG00000140859 | 0.030043847 | 0.030724553 | 0.028553589 | 0.021309823 |
| ENSG00000146066 | 0.021496551 | 0.027939305 | 0.029545156 | 0.028670974 |
| ENSG00000177613 | 0.028431998 | 0.040564927 | 0.040073074 | 0.026581818 |
| ENSG00000188800 | 0.014370996 | 0.025165747 | 0.025521661 | 0.014470049 |
| ENSG00000117620 | 0.032933    | 0.036071276 | 0.032659487 | 0.023367784 |
| ENSG00000146535 | 0.027533575 | 0.029104991 | 0.026293498 | 0.02339336  |
| ENSG00000152455 | 0.027030798 | 0.029707417 | 0.029308066 | 0.024011489 |
| ENSG00000140398 | 0.085115181 | 0.062309579 | 0.059404123 | 0.081524073 |

|                 |             |             |             |             |
|-----------------|-------------|-------------|-------------|-------------|
| ENSG00000174562 | 0.01430295  | 0.024877638 | 0.025019761 | 0.015180825 |
| ENSG00000176208 | 0.042212902 | 0.04154257  | 0.033746335 | 0.040144318 |
| ENSG00000133800 | 0.01512985  | 0.024611696 | 0.025181823 | 0.01477264  |
| ENSG00000111653 | 0.016173933 | 0.024845899 | 0.024781777 | 0.015488759 |
| ENSG00000102362 | 0.055149432 | 0.025331855 | 0.025858087 | 0.026782639 |
| ENSG00000179750 | 0.070676991 | 0.127929457 | 0.12701674  | 0.060184376 |
| ENSG00000059691 | 0.028919148 | 0.033648329 | 0.032391841 | 0.024926924 |
| ENSG00000138650 | 0.015368956 | 0.024567173 | 0.025317702 | 0.016123486 |
| ENSG00000120509 | 0.024396797 | 0.030756233 | 0.027717068 | 0.020396327 |
| ENSG00000175497 | 0.016508298 | 0.025468115 | 0.025365446 | 0.015654181 |
| ENSG00000140519 | 0.014935795 | 0.025216891 | 0.024879622 | 0.014131129 |
| ENSG00000197714 | 0.024721418 | 0.031934193 | 0.029434217 | 0.021604153 |
| ENSG00000138162 | 0.026455162 | 0.028874578 | 0.025031055 | 0.01510334  |
| ENSG00000155876 | 0.022980419 | 0.030313528 | 0.030732144 | 0.020116483 |
| ENSG00000109089 | 0.019203161 | 0.025636973 | 0.026648658 | 0.017722918 |
| ENSG00000101160 | 0.058922337 | 0.050734384 | 0.05233446  | 0.066848908 |
| ENSG00000175182 | 0.051242584 | 0.046442342 | 0.038667393 | 0.042990346 |
| ENSG00000182504 | 0.016535172 | 0.024972682 | 0.025845423 | 0.015973683 |
| ENSG00000198077 | 0.01687137  | 0.024966053 | 0.024511055 | 0.014747795 |
| ENSG00000100146 | 0.015576909 | 0.024802039 | 0.024955954 | 0.015318407 |
| ENSG00000174502 | 0.014896583 | 0.024949717 | 0.024434416 | 0.015935904 |
| ENSG00000177575 | 0.015340386 | 0.025009463 | 0.025579834 | 0.015084528 |
| ENSG00000198858 | 0.016833548 | 0.026345674 | 0.026309101 | 0.016193729 |
| ENSG00000137267 | 0.078534028 | 0.087192199 | 0.083935592 | 0.082672406 |
| ENSG00000145780 | 0.033085079 | 0.04256348  | 0.036505934 | 0.028049192 |
| ENSG00000171150 | 0.015806831 | 0.024906613 | 0.025272938 | 0.015679006 |
| ENSG00000244045 | 0.029031711 | 0.036398329 | 0.035336916 | 0.034742895 |
| ENSG00000171453 | 0.031243266 | 0.034834853 | 0.03832904  | 0.028181895 |
| ENSG00000100842 | 0.016804038 | 0.025737645 | 0.024746736 | 0.014425101 |
| ENSG00000166152 | 0.015457803 | 0.024858009 | 0.024876497 | 0.016055196 |
| ENSG00000095261 | 0.029911289 | 0.033900963 | 0.031929435 | 0.022862355 |
| ENSG00000171443 | 0.033096734 | 0.03565059  | 0.032619602 | 0.028653949 |
| ENSG00000186648 | 0.016351348 | 0.027909797 | 0.02781237  | 0.016425419 |
| ENSG00000099901 | 0.030938802 | 0.033015065 | 0.030812936 | 0.026929141 |
| ENSG00000141971 | 0.03106119  | 0.031962557 | 0.032190557 | 0.024649139 |
| ENSG00000136603 | 0.043998744 | 0.039705417 | 0.041749381 | 0.030209877 |
| ENSG00000068079 | 0.03360724  | 0.034734695 | 0.033566859 | 0.029648774 |
| ENSG00000171848 | 0.072089868 | 0.062327984 | 0.047065886 | 0.055115542 |
| ENSG00000058262 | 0.029580862 | 0.033228472 | 0.043939853 | 0.036838855 |
| ENSG00000173898 | 0.028664053 | 0.036547197 | 0.027446896 | 0.038795164 |
| ENSG00000072274 | 0.027106651 | 0.029604369 | 0.0283862   | 0.024764473 |
| ENSG00000116218 | 0.015148876 | 0.024617961 | 0.024611091 | 0.014960873 |
| ENSG00000108175 | 0.056127761 | 0.039022897 | 0.036276804 | 0.041729425 |
| ENSG00000155324 | 0.051727201 | 0.055390436 | 0.048686201 | 0.058590197 |
| ENSG00000116698 | 0.01631847  | 0.025251138 | 0.026079071 | 0.01556465  |
| ENSG00000147526 | 0.023785112 | 0.034654981 | 0.03329879  | 0.027072973 |
| ENSG00000144560 | 0.047249477 | 0.041799313 | 0.048909355 | 0.038962434 |
| ENSG00000134508 | 0.05341447  | 0.035937727 | 0.035585193 | 0.038354645 |
| ENSG00000233224 | 0.031371108 | 0.031326231 | 0.034777142 | 0.033713846 |
| ENSG00000172530 | 0.030696026 | 0.032526405 | 0.040088743 | 0.034313537 |
| ENSG00000175471 | 0.047310197 | 0.040673501 | 0.041328381 | 0.044283029 |
| ENSG00000115760 | 0.025986535 | 0.037654856 | 0.029388557 | 0.025573634 |
| ENSG00000152705 | 0.018489276 | 0.028723892 | 0.02649135  | 0.017522128 |
| ENSG00000116701 | 0.054674451 | 0.051265305 | 0.043425105 | 0.047291257 |

|                 |             |             |             |             |
|-----------------|-------------|-------------|-------------|-------------|
| ENSG00000188452 | 0.031513309 | 0.027499075 | 0.026592062 | 0.022914324 |
| ENSG00000051523 | 0.02690749  | 0.031314835 | 0.029108598 | 0.023588994 |
| ENSG00000196345 | 0.026394273 | 0.031575745 | 0.026879962 | 0.02120584  |
| ENSG00000205809 | 0.016808769 | 0.024653088 | 0.025105933 | 0.017089988 |
| ENSG00000010165 | 0.034281519 | 0.041282829 | 0.034875303 | 0.029795272 |
| ENSG00000048540 | 0.142422309 | 0.099611166 | 0.089717418 | 0.09541886  |
| ENSG00000176294 | 0.016755601 | 0.025400879 | 0.028233529 | 0.014417903 |
| ENSG00000174951 | 0.017055389 | 0.025664231 | 0.024762778 | 0.018166269 |
| ENSG00000084774 | 0.03485247  | 0.039946471 | 0.035008554 | 0.026391109 |
| ENSG00000107372 | 0.026588733 | 0.037354101 | 0.035762266 | 0.024877784 |
| ENSG00000084628 | 0.034131442 | 0.029421868 | 0.02484013  | 0.017960954 |
| ENSG00000144749 | 0.051960687 | 0.055063693 | 0.044945855 | 0.046943652 |
| ENSG00000073803 | 0.024718899 | 0.030192155 | 0.032885564 | 0.027660222 |
| ENSG00000070061 | 0.029634225 | 0.035654125 | 0.031261969 | 0.019874107 |
| ENSG00000001626 | 0.016267878 | 0.02685182  | 0.026407607 | 0.016458894 |
| ENSG00000074416 | 0.036805959 | 0.03788355  | 0.034690162 | 0.037069874 |
| ENSG00000206053 | 0.030142199 | 0.033761033 | 0.031879475 | 0.025190439 |
| ENSG00000129277 | 0.074254686 | 0.050752006 | 0.053359377 | 0.06156874  |
| ENSG00000092054 | 0.024516323 | 0.025357589 | 0.02604863  | 0.018539681 |
| ENSG00000164946 | 0.021377187 | 0.025347594 | 0.024374395 | 0.023277707 |
| ENSG00000113068 | 0.020140494 | 0.028781308 | 0.030716148 | 0.021849889 |
| ENSG00000125648 | 0.044726504 | 0.043714706 | 0.036706917 | 0.036460222 |
| ENSG00000125798 | 0.016965345 | 0.02524879  | 0.025841808 | 0.016854168 |
| ENSG00000144840 | 0.029943727 | 0.034123876 | 0.03534576  | 0.026806675 |
| ENSG00000164587 | 0.012998215 | 0.023582113 | 0.023388337 | 0.014560897 |
| ENSG00000168234 | 0.052261572 | 0.061492756 | 0.060091292 | 0.060118835 |
| ENSG00000243056 | 0.048325602 | 0.053848005 | 0.04517061  | 0.05202232  |
| ENSG00000198755 | 0.016400273 | 0.02508864  | 0.025795425 | 0.017130672 |
| ENSG00000168917 | 0.083817065 | 0.072595688 | 0.044995369 | 0.052724872 |
| ENSG00000152689 | 0.03487496  | 0.046842858 | 0.037358235 | 0.030730096 |
| ENSG00000076770 | 0.017938306 | 0.02660067  | 0.026827505 | 0.022363596 |
| ENSG00000151893 | 0.022375726 | 0.028548933 | 0.029027405 | 0.018442543 |
| ENSG00000130518 | 0.014791957 | 0.024550846 | 0.024101022 | 0.014403915 |
| ENSG00000132702 | 0.014845624 | 0.024589184 | 0.02404918  | 0.013698753 |
| ENSG00000090013 | 0.049874983 | 0.038661804 | 0.039528908 | 0.040640425 |
| ENSG00000115009 | 0.155882674 | 0.108535503 | 0.047663986 | 0.104359733 |
| ENSG00000067048 | 0.253568148 | 0.283227114 | 0.251468315 | 0.248287655 |
| ENSG00000168010 | 0.044748828 | 0.039552024 | 0.03965922  | 0.036456216 |
| ENSG00000184984 | 0.01552645  | 0.025516721 | 0.025032485 | 0.015295694 |
| ENSG00000137693 | 0.018616246 | 0.025095873 | 0.024612252 | 0.015467747 |
| ENSG00000187068 | 0.017372052 | 0.025161113 | 0.02512231  | 0.015944714 |
| ENSG00000114113 | 0.016760765 | 0.025241307 | 0.026273021 | 0.015684445 |
| ENSG00000135749 | 0.02156049  | 0.028520456 | 0.026017634 | 0.022623351 |
| ENSG00000157927 | 0.015667742 | 0.025390858 | 0.024445856 | 0.014920082 |
| ENSG00000039600 | 0.017504404 | 0.025514656 | 0.025433174 | 0.024936745 |
| ENSG00000168066 | 0.053354307 | 0.069744954 | 0.06889615  | 0.080363798 |
| ENSG00000072954 | 0.030883737 | 0.031919749 | 0.030963447 | 0.03731589  |
| ENSG00000136068 | 0.065121737 | 0.058543157 | 0.050667773 | 0.051993538 |
| ENSG00000178342 | 0.013981092 | 0.025387429 | 0.024978275 | 0.015295038 |
| ENSG00000180061 | 0.014912183 | 0.02523392  | 0.025728084 | 0.016100602 |
| ENSG00000164758 | 0.038310142 | 0.037027834 | 0.033287842 | 0.029347093 |
| ENSG00000165714 | 0.026826404 | 0.029766126 | 0.027584821 | 0.019415786 |
| ENSG00000196950 | 0.058174931 | 0.045977319 | 0.039341091 | 0.038228681 |
| ENSG00000163683 | 0.044072939 | 0.041623104 | 0.036323589 | 0.041617946 |

|                 |             |             |             |             |
|-----------------|-------------|-------------|-------------|-------------|
| ENSG00000136108 | 0.040400665 | 0.043130328 | 0.037721799 | 0.03352914  |
| ENSG00000100426 | 0.028124526 | 0.040874442 | 0.038228539 | 0.027434361 |
| ENSG00000147889 | 0.014651339 | 0.024785469 | 0.024475682 | 0.015175559 |
| ENSG00000026025 | 0.078316916 | 0.050983415 | 0.046364638 | 0.066813634 |
| ENSG00000173020 | 0.016104037 | 0.025019569 | 0.025444589 | 0.015560293 |
| ENSG00000142224 | 0.040658814 | 0.038525554 | 0.034150506 | 0.029191107 |
| ENSG00000072840 | 0.089363397 | 0.049000473 | 0.037778567 | 0.058774252 |
| ENSG00000184502 | 0.017895976 | 0.027698857 | 0.025418378 | 0.017176545 |
| ENSG00000029993 | 0.040410739 | 0.038350586 | 0.034221778 | 0.034102703 |
| ENSG00000149636 | 0.03044862  | 0.030996755 | 0.03224965  | 0.02395805  |
| ENSG00000167346 | 0.015504365 | 0.025895583 | 0.024824386 | 0.015620026 |
| ENSG00000168412 | 0.017881631 | 0.02602907  | 0.025908116 | 0.016322947 |
| ENSG00000169413 | 0.070867683 | 0.057878072 | 0.055288578 | 0.066162267 |
| ENSG00000184564 | 0.019626335 | 0.026579523 | 0.026647428 | 0.017369705 |
| ENSG00000148848 | 0.021480616 | 0.024028791 | 0.024472152 | 0.01629631  |
| ENSG00000171564 | 0.015748964 | 0.024750305 | 0.025220736 | 0.016143325 |
| ENSG00000167625 | 0.032072041 | 0.03269629  | 0.034119022 | 0.025706123 |
| ENSG00000182010 | 0.016812939 | 0.025422196 | 0.026358211 | 0.016351534 |
| ENSG00000161640 | 0.017020082 | 0.026134822 | 0.024116117 | 0.014982001 |
| ENSG00000143420 | 0.02675069  | 0.035779239 | 0.033857517 | 0.028634759 |
| ENSG00000198739 | 0.015206826 | 0.024974035 | 0.024739154 | 0.015954079 |
| ENSG00000104964 | 0.020110463 | 0.030366087 | 0.028186928 | 0.020720315 |
| ENSG00000171522 | 0.024484058 | 0.026783647 | 0.028072115 | 0.018881691 |
| ENSG00000116991 | 0.015742091 | 0.025462956 | 0.025480511 | 0.017739605 |
| ENSG00000160226 | 0.016671318 | 0.025272534 | 0.026439474 | 0.017871066 |
| ENSG00000189190 | 0.024682013 | 0.029009346 | 0.028920295 | 0.023481442 |
| ENSG00000137947 | 0.024626627 | 0.032332627 | 0.036633519 | 0.021093673 |
| ENSG00000067900 | 0.035068161 | 0.04574274  | 0.037256281 | 0.03231753  |
| ENSG00000118707 | 0.026377709 | 0.034142533 | 0.031895846 | 0.022787608 |
| ENSG00000141977 | 0.019704706 | 0.025754185 | 0.02565446  | 0.018102459 |
| ENSG00000213416 | 0.01893877  | 0.026709688 | 0.028494553 | 0.017591944 |
| ENSG00000188396 | 0.016618694 | 0.025272229 | 0.025928878 | 0.015855224 |
| ENSG00000100335 | 0.027865455 | 0.033250498 | 0.038418695 | 0.029039404 |
| ENSG00000105245 | 0.019437554 | 0.03163805  | 0.033502972 | 0.028120683 |
| ENSG00000149212 | 0.053609042 | 0.052315205 | 0.037122079 | 0.041222751 |
| ENSG00000135709 | 0.081746378 | 0.051547674 | 0.05653588  | 0.05527522  |
| ENSG00000196730 | 0.080270868 | 0.071331207 | 0.067628551 | 0.061242903 |
| ENSG00000186513 | 0.016748392 | 0.0258212   | 0.02488086  | 0.015457993 |
| ENSG00000161270 | 0.017312262 | 0.026154226 | 0.027277289 | 0.016944174 |
| ENSG00000196226 | 0.050774945 | 0.049039723 | 0.053024784 | 0.051561448 |
| ENSG00000150076 | 0.022364687 | 0.026382874 | 0.028272598 | 0.018420071 |
| ENSG00000082458 | 0.037768721 | 0.034276598 | 0.030230793 | 0.02787038  |
| ENSG00000136933 | 0.032506104 | 0.034187476 | 0.029716705 | 0.022032113 |
| ENSG00000122218 | 0.019805501 | 0.028370393 | 0.030308452 | 0.020547979 |
| ENSG00000165660 | 0.025657068 | 0.034225718 | 0.032388133 | 0.020884317 |
| ENSG00000179284 | 0.017852545 | 0.026046623 | 0.02613511  | 0.017523659 |
| ENSG00000155158 | 0.047618168 | 0.048876186 | 0.048761403 | 0.041377026 |
| ENSG00000141540 | 0.05410078  | 0.050422085 | 0.049214959 | 0.050382793 |
| ENSG00000180902 | 0.046710295 | 0.043447103 | 0.039862395 | 0.036178662 |
| ENSG00000125743 | 0.022515804 | 0.027442382 | 0.027635599 | 0.020356281 |
| ENSG00000130332 | 0.023402057 | 0.027233926 | 0.029695054 | 0.020466426 |
| ENSG00000130164 | 0.043411405 | 0.042743271 | 0.043391558 | 0.033852021 |
| ENSG00000179914 | 0.016526504 | 0.025347666 | 0.024428366 | 0.015139262 |
| ENSG00000228314 | 0.046478302 | 0.040810174 | 0.037917323 | 0.052023863 |



|                 |             |             |             |             |
|-----------------|-------------|-------------|-------------|-------------|
| ENSG00000143248 | 0.017438109 | 0.027193823 | 0.026161446 | 0.019986781 |
| ENSG00000144406 | 0.019123276 | 0.026762373 | 0.026320138 | 0.017949287 |
| ENSG00000197641 | 0.017373105 | 0.025334809 | 0.0258893   | 0.015768631 |
| ENSG00000188827 | 0.015491945 | 0.025852243 | 0.025491209 | 0.015086016 |
| ENSG00000082512 | 0.018266522 | 0.02585689  | 0.025091573 | 0.01654075  |
| ENSG00000070081 | 0.05747625  | 0.050099401 | 0.048762761 | 0.054525106 |
| ENSG00000182718 | 0.040941734 | 0.039345719 | 0.035256383 | 0.039344119 |
| ENSG00000171316 | 0.027841308 | 0.033247624 | 0.033570443 | 0.026670753 |
| ENSG00000117625 | 0.027992392 | 0.034966018 | 0.031906463 | 0.025367193 |
| ENSG00000198796 | 0.094890637 | 0.076073242 | 0.065302976 | 0.065447927 |
| ENSG00000117153 | 0.024855164 | 0.034529059 | 0.03074075  | 0.024435527 |
| ENSG00000178363 | 0.014807731 | 0.025755447 | 0.025136191 | 0.014150189 |
| ENSG00000109854 | 0.031600438 | 0.035934036 | 0.033493679 | 0.024678507 |
| ENSG00000131969 | 0.016351592 | 0.02506849  | 0.024420891 | 0.014589321 |
| ENSG00000077157 | 0.015463806 | 0.024770744 | 0.024596466 | 0.015495836 |
| ENSG00000138756 | 0.038859477 | 0.031044495 | 0.030211269 | 0.025050132 |
| ENSG00000188573 | 0.017729195 | 0.025144093 | 0.024687506 | 0.014871472 |
| ENSG00000163661 | 0.015828047 | 0.025007252 | 0.025524677 | 0.014222997 |
| ENSG00000183145 | 0.070913514 | 0.059125793 | 0.059507919 | 0.074152424 |
| ENSG00000196465 | 0.022066946 | 0.030382935 | 0.028643493 | 0.026521552 |
| ENSG00000121753 | 0.020652384 | 0.027752309 | 0.026250423 | 0.023084605 |
| ENSG00000165795 | 0.015905564 | 0.025340444 | 0.025017943 | 0.01544737  |
| ENSG00000163424 | 0.016278464 | 0.024882468 | 0.025129302 | 0.01497469  |
| ENSG00000134490 | 0.043968465 | 0.04096061  | 0.042370889 | 0.038164227 |
| ENSG00000102471 | 0.034220825 | 0.038916179 | 0.040556949 | 0.037153946 |
| ENSG00000138796 | 0.044289489 | 0.042288049 | 0.035945308 | 0.030243177 |
| ENSG00000227826 | 0.107741841 | 0.148766627 | 0.134662087 | 0.109525912 |
| ENSG00000100439 | 0.044261229 | 0.040436947 | 0.046474324 | 0.042855249 |
| ENSG00000169228 | 0.028134994 | 0.037142103 | 0.032519402 | 0.024059254 |
| ENSG00000075073 | 0.016338451 | 0.025234981 | 0.024730715 | 0.015405537 |
| ENSG00000166681 | 0.127278052 | 0.132542685 | 0.094318283 | 0.128707887 |
| ENSG00000119705 | 0.021139615 | 0.027548307 | 0.026291701 | 0.020145469 |
| ENSG00000183426 | 0.020944444 | 0.026564141 | 0.033224365 | 0.019375349 |
| ENSG00000143479 | 0.052183281 | 0.041651966 | 0.042489031 | 0.037376688 |
| ENSG00000097033 | 0.026364614 | 0.033653729 | 0.033709283 | 0.020673107 |
| ENSG00000125787 | 0.015871791 | 0.025257243 | 0.024881542 | 0.015526703 |
| ENSG00000121381 | 0.016408759 | 0.025208853 | 0.024534104 | 0.014501749 |
| ENSG00000083857 | 0.099617583 | 0.050399749 | 0.028847072 | 0.050436222 |
| ENSG00000170633 | 0.017186265 | 0.026245453 | 0.026110477 | 0.016802404 |
| ENSG00000182533 | 0.016829932 | 0.025075648 | 0.026228467 | 0.016611005 |
| ENSG00000144057 | 0.015878474 | 0.026182584 | 0.024262351 | 0.015447453 |
| ENSG00000119865 | 0.018171405 | 0.026846859 | 0.026242908 | 0.015775644 |
| ENSG00000157379 | 0.040402723 | 0.039959288 | 0.041570197 | 0.044882789 |
| ENSG00000184650 | 0.021861855 | 0.029207447 | 0.027433424 | 0.020021362 |
| ENSG00000079459 | 0.022211542 | 0.028858096 | 0.027362221 | 0.020586124 |
| ENSG00000068781 | 0.015230156 | 0.024905408 | 0.025057991 | 0.015464092 |
| ENSG00000172260 | 0.015845005 | 0.02451496  | 0.024462382 | 0.014955697 |
| ENSG00000119408 | 0.034864232 | 0.043479985 | 0.042792318 | 0.039477417 |
| ENSG00000129596 | 0.035736654 | 0.029221085 | 0.031277483 | 0.021020951 |
| ENSG00000115155 | 0.035910876 | 0.035712291 | 0.041609503 | 0.034690845 |
| ENSG00000146151 | 0.017011006 | 0.025028412 | 0.025314777 | 0.015580148 |
| ENSG00000165775 | 0.027354354 | 0.029719627 | 0.032486113 | 0.027826207 |
| ENSG00000171209 | 0.015515506 | 0.024648471 | 0.024228573 | 0.014138952 |
| ENSG00000092295 | 0.032498741 | 0.035720019 | 0.035685887 | 0.029055251 |

|                 |             |             |             |             |
|-----------------|-------------|-------------|-------------|-------------|
| ENSG00000148688 | 0.020044565 | 0.027432572 | 0.026247927 | 0.017203464 |
| ENSG00000109929 | 0.030527509 | 0.034728613 | 0.038416766 | 0.02913874  |
| ENSG00000179058 | 0.016338209 | 0.025619327 | 0.024580121 | 0.015278468 |
| ENSG00000122958 | 0.023917271 | 0.03036276  | 0.028838436 | 0.023118555 |
| ENSG00000186567 | 0.014218219 | 0.025170638 | 0.024470071 | 0.015341423 |
| ENSG00000176248 | 0.02490966  | 0.028673098 | 0.028815468 | 0.025156464 |
| ENSG00000106244 | 0.024777204 | 0.030071765 | 0.030876162 | 0.024244356 |
| ENSG00000124813 | 0.01661014  | 0.025208824 | 0.025102282 | 0.014569248 |
| ENSG00000179869 | 0.021537912 | 0.0280001   | 0.026136732 | 0.018264706 |
| ENSG00000198246 | 0.015831004 | 0.024604926 | 0.024442686 | 0.014363767 |
| ENSG00000198074 | 0.015361751 | 0.024589056 | 0.024723918 | 0.01566041  |
| ENSG00000154124 | 0.035985175 | 0.039997949 | 0.041583807 | 0.032047614 |
| ENSG00000088543 | 0.017913398 | 0.028179143 | 0.025085964 | 0.017814714 |
| ENSG00000168078 | 0.048655446 | 0.037824941 | 0.035095162 | 0.037670097 |
| ENSG00000223730 | 0.015867731 | 0.024675945 | 0.02496338  | 0.016456929 |
| ENSG00000183340 | 0.025136738 | 0.034310633 | 0.028712939 | 0.021613779 |
| ENSG00000103723 | 0.016539722 | 0.025238369 | 0.024814714 | 0.016326596 |
| ENSG00000169248 | 0.01977118  | 0.026564856 | 0.026330058 | 0.015560784 |
| ENSG00000156219 | 0.015387666 | 0.024948439 | 0.025298291 | 0.015332075 |
| ENSG00000166823 | 0.052575478 | 0.049889508 | 0.046273043 | 0.044409802 |
| ENSG00000162654 | 0.104295726 | 0.100500946 | 0.095493115 | 0.112277505 |
| ENSG00000107223 | 0.016184748 | 0.024257109 | 0.024445773 | 0.01531503  |
| ENSG00000221955 | 0.065760186 | 0.05070852  | 0.042758157 | 0.063599972 |
| ENSG00000049239 | 0.01674936  | 0.024902024 | 0.023788423 | 0.015153609 |
| ENSG00000144837 | 0.088297711 | 0.051954734 | 0.055388065 | 0.06714615  |
| ENSG00000133627 | 0.03559944  | 0.035462872 | 0.032143262 | 0.030520161 |
| ENSG00000100038 | 0.025382473 | 0.032359428 | 0.033729589 | 0.024445647 |
| ENSG00000104067 | 0.08006845  | 0.031056064 | 0.027536544 | 0.040470152 |
| ENSG00000187173 | 0.015635115 | 0.024164422 | 0.025463498 | 0.014941641 |
| ENSG00000129235 | 0.028100335 | 0.03140443  | 0.026892941 | 0.025655136 |
| ENSG00000115318 | 0.075318779 | 0.057654705 | 0.05109257  | 0.064507764 |
| ENSG00000008294 | 0.032874724 | 0.033539159 | 0.034826107 | 0.024740193 |
| ENSG00000106299 | 0.027850918 | 0.035418023 | 0.035111661 | 0.024714281 |
| ENSG00000149582 | 0.018529236 | 0.028011462 | 0.026423325 | 0.018053946 |
| ENSG00000197885 | 0.033971361 | 0.035208192 | 0.034422868 | 0.030516542 |
| ENSG00000100523 | 0.034304677 | 0.039824649 | 0.032327399 | 0.031267605 |
| ENSG00000148399 | 0.028979625 | 0.032793804 | 0.032775768 | 0.023900778 |
| ENSG00000130427 | 0.016989304 | 0.025007889 | 0.026074655 | 0.018012762 |
| ENSG00000185668 | 0.027004656 | 0.030422804 | 0.027636648 | 0.029158225 |
| ENSG00000109111 | 0.020460812 | 0.028928294 | 0.030515592 | 0.022555215 |
| ENSG00000135973 | 0.017614831 | 0.026577491 | 0.026606659 | 0.016697808 |
| ENSG00000127928 | 0.01722319  | 0.025651418 | 0.02542835  | 0.016856237 |
| ENSG00000186395 | 0.026859923 | 0.038981719 | 0.039935363 | 0.026658773 |
| ENSG00000076554 | 0.020309128 | 0.026605539 | 0.027039747 | 0.016364153 |
| ENSG00000114738 | 0.046730433 | 0.043940163 | 0.047336487 | 0.046670891 |
| ENSG00000170348 | 0.032257278 | 0.035117829 | 0.037489904 | 0.029897156 |
| ENSG00000105193 | 0.020606796 | 0.02737089  | 0.026267721 | 0.021310714 |
| ENSG00000104883 | 0.018859589 | 0.027369431 | 0.024573796 | 0.016468467 |
| ENSG00000115594 | 0.115406661 | 0.098671061 | 0.056684816 | 0.089605947 |
| ENSG00000123473 | 0.016929191 | 0.026749585 | 0.025746678 | 0.017040754 |
| ENSG00000122566 | 0.025877215 | 0.03145163  | 0.02783204  | 0.023503812 |
| ENSG00000162627 | 0.025209923 | 0.025396366 | 0.025040802 | 0.016581618 |
| ENSG00000180483 | 0.017095844 | 0.025461011 | 0.024923719 | 0.017687971 |
| ENSG00000111300 | 0.03337373  | 0.032734993 | 0.033318842 | 0.029355792 |

|                 |             |             |             |             |
|-----------------|-------------|-------------|-------------|-------------|
| ENSG0000086232  | 0.022768059 | 0.030236511 | 0.035657375 | 0.023672566 |
| ENSG00000140678 | 0.062853714 | 0.053322396 | 0.049557818 | 0.082745547 |
| ENSG00000173120 | 0.022093456 | 0.031581701 | 0.037018064 | 0.023599174 |
| ENSG00000166432 | 0.025987313 | 0.029504238 | 0.027356546 | 0.026402101 |
| ENSG00000129514 | 0.050466078 | 0.033936786 | 0.030457691 | 0.019678023 |
| ENSG00000170035 | 0.014926281 | 0.024846278 | 0.025476184 | 0.014538397 |
| ENSG00000142273 | 0.019468872 | 0.027881335 | 0.025996138 | 0.020659161 |
| ENSG00000167749 | 0.049809311 | 0.05416763  | 0.045599851 | 0.057150976 |
| ENSG00000163702 | 0.015262804 | 0.025703224 | 0.024442885 | 0.014968705 |
| ENSG00000186081 | 0.028093747 | 0.024655569 | 0.025966027 | 0.019392446 |
| ENSG00000013375 | 0.035822092 | 0.037174323 | 0.041259803 | 0.037064138 |
| ENSG00000221986 | 0.017023242 | 0.026176736 | 0.024435074 | 0.015804418 |
| ENSG00000133863 | 0.033453014 | 0.035824572 | 0.027159189 | 0.03173027  |
| ENSG00000122884 | 0.061546758 | 0.038008041 | 0.035746485 | 0.040396563 |
| ENSG00000176749 | 0.073791856 | 0.049850626 | 0.044908038 | 0.066003093 |
| ENSG00000017621 | 0.016047284 | 0.025897924 | 0.024936005 | 0.015944318 |
| ENSG00000248144 | 0.020403188 | 0.024336142 | 0.026123472 | 0.016789047 |
| ENSG00000109445 | 0.027236066 | 0.031319703 | 0.031029985 | 0.020405668 |
| ENSG00000188352 | 0.044322497 | 0.039630076 | 0.036974369 | 0.031656904 |
| ENSG00000108561 | 0.025634467 | 0.027670555 | 0.026889078 | 0.020577716 |
| ENSG00000153107 | 0.028616811 | 0.033269543 | 0.029877931 | 0.020203628 |
| ENSG00000132541 | 0.053530818 | 0.048349407 | 0.038367852 | 0.040489648 |
| ENSG00000223802 | 0.017932047 | 0.024901281 | 0.025599986 | 0.014990541 |
| ENSG00000042429 | 0.023600183 | 0.030760325 | 0.027007888 | 0.019237292 |
| ENSG00000125551 | 0.028879132 | 0.030557943 | 0.034607939 | 0.024129398 |
| ENSG00000177082 | 0.031706248 | 0.035111474 | 0.042090098 | 0.027443172 |
| ENSG00000134201 | 0.015962494 | 0.024653327 | 0.024558575 | 0.015650112 |
| ENSG00000054116 | 0.028320605 | 0.033401713 | 0.032352615 | 0.02375788  |
| ENSG00000198876 | 0.026511338 | 0.032219348 | 0.029467964 | 0.020894866 |
| ENSG00000119778 | 0.023201281 | 0.032950446 | 0.029500745 | 0.020763045 |
| ENSG00000169594 | 0.014848157 | 0.024394851 | 0.024768983 | 0.015692434 |
| ENSG00000109099 | 0.015051004 | 0.025053714 | 0.024401794 | 0.026780195 |
| ENSG00000140992 | 0.02549078  | 0.031938842 | 0.031573722 | 0.022675792 |
| ENSG00000172888 | 0.028273905 | 0.031288793 | 0.030982269 | 0.023824914 |
| ENSG00000149294 | 0.015613427 | 0.024469095 | 0.025078584 | 0.01620213  |
| ENSG00000175376 | 0.03192916  | 0.035688875 | 0.03691153  | 0.024095842 |
| ENSG00000140521 | 0.020775822 | 0.030281035 | 0.028757991 | 0.0200509   |
| ENSG00000072786 | 0.029463244 | 0.033304377 | 0.034659596 | 0.0248956   |
| ENSG00000006116 | 0.032759594 | 0.026436869 | 0.025210236 | 0.038742331 |
| ENSG00000198719 | 0.036755412 | 0.051089887 | 0.042457149 | 0.050253191 |
| ENSG00000186300 | 0.017945362 | 0.026987865 | 0.024663975 | 0.016625931 |
| ENSG00000243667 | 0.036595095 | 0.04473641  | 0.036111621 | 0.031216614 |
| ENSG00000196323 | 0.036929073 | 0.036978784 | 0.038387888 | 0.034951709 |
| ENSG00000007306 | 0.015068531 | 0.024856297 | 0.024469923 | 0.015077528 |
| ENSG00000196532 | 0.067619846 | 0.050237343 | 0.066201593 | 0.073517507 |
| ENSG00000107937 | 0.028260208 | 0.034396131 | 0.033607291 | 0.030219119 |
| ENSG00000183955 | 0.033165052 | 0.035584933 | 0.037039394 | 0.040025964 |
| ENSG00000183431 | 0.026436365 | 0.030426563 | 0.033520855 | 0.026138545 |
| ENSG00000145335 | 0.048266391 | 0.028709453 | 0.027149104 | 0.040569302 |
| ENSG00000213347 | 0.043705752 | 0.032294837 | 0.034338313 | 0.029841097 |
| ENSG00000150991 | 0.014074979 | 0.02377619  | 0.024638588 | 0.013515026 |
| ENSG00000182108 | 0.03382288  | 0.036872078 | 0.036043233 | 0.033771092 |
| ENSG00000125821 | 0.029133572 | 0.032201426 | 0.03341834  | 0.023511746 |
| ENSG00000109182 | 0.016704662 | 0.025514029 | 0.02500827  | 0.016381879 |

|                 |             |             |             |             |
|-----------------|-------------|-------------|-------------|-------------|
| ENSG00000169116 | 0.023321252 | 0.028749397 | 0.027225706 | 0.024325342 |
| ENSG00000196943 | 0.023224617 | 0.027537615 | 0.027215227 | 0.017926357 |
| ENSG00000142511 | 0.014956617 | 0.024018489 | 0.024287215 | 0.01440346  |
| ENSG00000158555 | 0.068971562 | 0.084019337 | 0.063433251 | 0.052496597 |
| ENSG00000196376 | 0.016586026 | 0.02469643  | 0.024628169 | 0.015089233 |
| ENSG00000124380 | 0.03333763  | 0.035884397 | 0.037050256 | 0.027192694 |
| ENSG00000196565 | 0.067220104 | 0.026413282 | 0.025102266 | 0.021358345 |
| ENSG00000114030 | 0.027933648 | 0.032127735 | 0.034731025 | 0.028644263 |
| ENSG00000176853 | 0.039617047 | 0.040272536 | 0.046602455 | 0.033152434 |
| ENSG00000182810 | 0.030676119 | 0.037726202 | 0.046649824 | 0.031595446 |
| ENSG00000139610 | 0.01972326  | 0.025460446 | 0.025474285 | 0.017449417 |
| ENSG00000087903 | 0.022074775 | 0.028665506 | 0.027247726 | 0.021396309 |
| ENSG00000119723 | 0.017604347 | 0.025273216 | 0.025525617 | 0.016055503 |
| ENSG00000124783 | 0.028056754 | 0.032666623 | 0.03305931  | 0.028010072 |
| ENSG00000168438 | 0.034169806 | 0.040778757 | 0.034743538 | 0.02801558  |
| ENSG00000151923 | 0.015400012 | 0.025918437 | 0.025274877 | 0.014124095 |
| ENSG00000142528 | 0.024251559 | 0.02746832  | 0.028600697 | 0.030544991 |
| ENSG00000165409 | 0.016335178 | 0.025578171 | 0.026744072 | 0.016559357 |
| ENSG00000123453 | 0.032141293 | 0.040916271 | 0.037017905 | 0.04449024  |
| ENSG00000061656 | 0.076001435 | 0.04647411  | 0.047846201 | 0.049464651 |
| ENSG00000156136 | 0.046564262 | 0.052542091 | 0.039460105 | 0.033424238 |
| ENSG00000081386 | 0.026438743 | 0.034688843 | 0.031646736 | 0.025640428 |
| ENSG00000140830 | 0.0302002   | 0.02871868  | 0.035425491 | 0.026808846 |
| ENSG00000163600 | 0.061788495 | 0.094602463 | 0.086661045 | 0.084955344 |
| ENSG00000162174 | 0.098149246 | 0.049921756 | 0.042729534 | 0.065340412 |
| ENSG00000198585 | 0.022044369 | 0.028138294 | 0.028772048 | 0.022383304 |
| ENSG00000109381 | 0.02988408  | 0.04038693  | 0.040036071 | 0.026782651 |
| ENSG00000123836 | 0.014392864 | 0.024925724 | 0.024357849 | 0.01403394  |
| ENSG00000183734 | 0.025200529 | 0.028618767 | 0.034447049 | 0.021698112 |
| ENSG00000185860 | 0.01731295  | 0.024813396 | 0.025633708 | 0.015403454 |
| ENSG00000111186 | 0.016830683 | 0.024969604 | 0.02556782  | 0.016133881 |
| ENSG00000134278 | 0.020142219 | 0.023932363 | 0.025273932 | 0.015422684 |
| ENSG00000126091 | 0.02686868  | 0.030251361 | 0.03186969  | 0.021098229 |
| ENSG00000177752 | 0.016724962 | 0.025893511 | 0.025883604 | 0.016687183 |
| ENSG00000094796 | 0.014994925 | 0.024586607 | 0.024341751 | 0.014862905 |
| ENSG00000119535 | 0.018455597 | 0.026411487 | 0.025693433 | 0.017254582 |
| ENSG00000188321 | 0.040128366 | 0.045568136 | 0.051539518 | 0.033756051 |
| ENSG00000138744 | 0.063161793 | 0.04521069  | 0.045995171 | 0.056402574 |
| ENSG00000181577 | 0.085944995 | 0.070420216 | 0.061848707 | 0.073638244 |
| ENSG00000157500 | 0.033237481 | 0.044376642 | 0.038937939 | 0.035587343 |
| ENSG00000099977 | 0.018604435 | 0.026885934 | 0.027535838 | 0.022320009 |
| ENSG00000173681 | 0.038169766 | 0.036376663 | 0.033771022 | 0.036134023 |
| ENSG00000131171 | 0.021239204 | 0.031756835 | 0.028189075 | 0.022893735 |
| ENSG00000141150 | 0.01909183  | 0.025616436 | 0.026079631 | 0.017074593 |
| ENSG00000162924 | 0.050610365 | 0.054336766 | 0.053010395 | 0.041154604 |
| ENSG00000143612 | 0.018205842 | 0.026713407 | 0.026991563 | 0.018800548 |
| ENSG00000173917 | 0.106656017 | 0.079936004 | 0.067234339 | 0.074961039 |
| ENSG00000090659 | 0.014849904 | 0.025593427 | 0.025192937 | 0.016004837 |
| ENSG00000175334 | 0.030249229 | 0.033161225 | 0.033152091 | 0.031690058 |
| ENSG00000213654 | 0.021392066 | 0.028397566 | 0.033942793 | 0.022672622 |
| ENSG00000163719 | 0.036966765 | 0.036854151 | 0.047264109 | 0.036048599 |
| ENSG00000117592 | 0.030855064 | 0.036793644 | 0.033688679 | 0.024018243 |
| ENSG00000188611 | 0.020654058 | 0.027333727 | 0.028689686 | 0.019187436 |
| ENSG00000065609 | 0.018487489 | 0.027335765 | 0.024851447 | 0.015631227 |

|                 |             |             |             |             |
|-----------------|-------------|-------------|-------------|-------------|
| ENSG00000152785 | 0.015867326 | 0.024775093 | 0.024523507 | 0.015428787 |
| ENSG00000138135 | 0.015937151 | 0.02688434  | 0.025624767 | 0.015855178 |
| ENSG00000129221 | 0.017014896 | 0.025334808 | 0.024217595 | 0.015692699 |
| ENSG00000173728 | 0.01674246  | 0.024779612 | 0.025292761 | 0.014733528 |
| ENSG00000197497 | 0.029104196 | 0.02993024  | 0.031413731 | 0.025577156 |
| ENSG00000105612 | 0.046521193 | 0.039108029 | 0.038491791 | 0.029933374 |
| ENSG00000132623 | 0.020218555 | 0.026942358 | 0.025442818 | 0.015905635 |
| ENSG00000171487 | 0.016650464 | 0.025330664 | 0.024834247 | 0.015619724 |
| ENSG00000213380 | 0.019177607 | 0.027402436 | 0.031165976 | 0.020015407 |
| ENSG00000118094 | 0.01681347  | 0.024542912 | 0.025220966 | 0.015431892 |
| ENSG00000141425 | 0.034132239 | 0.036971004 | 0.032117776 | 0.028813746 |
| ENSG00000173846 | 0.028302054 | 0.033990733 | 0.038281587 | 0.025451646 |
| ENSG00000163565 | 0.025780532 | 0.029801768 | 0.029222006 | 0.021928227 |
| ENSG00000162992 | 0.017908966 | 0.026866608 | 0.027423837 | 0.015829761 |
| ENSG00000197976 | 0.023817975 | 0.0315203   | 0.029166243 | 0.024837092 |
| ENSG00000132326 | 0.036804053 | 0.038139563 | 0.040215605 | 0.033324288 |
| ENSG00000181035 | 0.035646181 | 0.039988696 | 0.042165436 | 0.042433997 |
| ENSG00000203326 | 0.030251719 | 0.036236204 | 0.036354712 | 0.032798462 |
| ENSG00000175115 | 0.03331427  | 0.036589675 | 0.037310502 | 0.033671822 |
| ENSG00000135686 | 0.030758359 | 0.034807382 | 0.036221357 | 0.024963597 |
| ENSG00000068323 | 0.018673826 | 0.028664903 | 0.031342704 | 0.019617228 |
| ENSG00000106823 | 0.022329277 | 0.028982831 | 0.028660574 | 0.021323663 |
| ENSG00000100116 | 0.045108716 | 0.036449955 | 0.036876616 | 0.033460821 |
| ENSG00000092841 | 0.021854117 | 0.028812606 | 0.02679955  | 0.021211225 |
| ENSG00000146360 | 0.017213844 | 0.026816048 | 0.024367453 | 0.015762991 |
| ENSG00000216937 | 0.01836482  | 0.026958418 | 0.026822162 | 0.015853058 |
| ENSG00000047617 | 0.014968292 | 0.024334387 | 0.024641722 | 0.015293016 |
| ENSG00000111110 | 0.014742373 | 0.025051531 | 0.024179469 | 0.014511326 |
| ENSG00000184307 | 0.048903436 | 0.040824055 | 0.040719991 | 0.038182331 |
| ENSG00000174886 | 0.020397983 | 0.02724423  | 0.02781318  | 0.017821034 |
| ENSG00000027869 | 0.080168391 | 0.051198107 | 0.045607796 | 0.054619029 |
| ENSG00000126391 | 0.031514517 | 0.034889867 | 0.036777961 | 0.031591382 |
| ENSG00000131379 | 0.017842863 | 0.026274069 | 0.025911888 | 0.017383351 |
| ENSG00000172725 | 0.030474938 | 0.035537612 | 0.028501072 | 0.031371066 |
| ENSG00000013306 | 0.028778364 | 0.029737869 | 0.028238058 | 0.02245035  |
| ENSG00000113595 | 0.017186837 | 0.025653381 | 0.026172092 | 0.016621349 |
| ENSG00000171766 | 0.06249615  | 0.054204322 | 0.046046967 | 0.048891656 |
| ENSG00000133104 | 0.092886331 | 0.068071152 | 0.054158162 | 0.067907852 |
| ENSG00000148516 | 0.04423714  | 0.048600945 | 0.041813447 | 0.051041212 |
| ENSG00000213215 | 0.016081543 | 0.024453374 | 0.026365635 | 0.014848964 |
| ENSG00000089063 | 0.02428784  | 0.030218735 | 0.026550031 | 0.020646684 |
| ENSG00000053524 | 0.017209478 | 0.025584084 | 0.026475187 | 0.016230062 |
| ENSG00000110244 | 0.017954254 | 0.027121276 | 0.026109534 | 0.016945888 |
| ENSG00000110076 | 0.016963008 | 0.025432257 | 0.02704474  | 0.01701892  |
| ENSG00000107890 | 0.032341362 | 0.03765741  | 0.032615298 | 0.030373272 |
| ENSG00000091972 | 0.057976325 | 0.065924842 | 0.050759955 | 0.056354084 |
| ENSG00000150636 | 0.017839795 | 0.025071261 | 0.024796923 | 0.017940141 |
| ENSG00000236637 | 0.016421029 | 0.02607165  | 0.025689064 | 0.017057371 |
| ENSG00000070019 | 0.021613596 | 0.026861448 | 0.029272828 | 0.024028585 |
| ENSG00000119599 | 0.039839372 | 0.046997226 | 0.054922513 | 0.038558677 |
| ENSG00000134216 | 0.016279267 | 0.024353894 | 0.024738908 | 0.015302602 |
| ENSG00000237651 | 0.051709105 | 0.052516783 | 0.052526744 | 0.045815646 |
| ENSG00000165181 | 0.017539746 | 0.027010354 | 0.025709752 | 0.016840193 |
| ENSG00000175793 | 0.037416189 | 0.042145264 | 0.032616666 | 0.027274835 |

|                 |             |             |             |             |
|-----------------|-------------|-------------|-------------|-------------|
| ENSG00000206384 | 0.015666404 | 0.024911097 | 0.025393015 | 0.015320336 |
| ENSG00000129749 | 0.020774606 | 0.027972508 | 0.028804288 | 0.016485233 |
| ENSG00000152242 | 0.024885567 | 0.030632295 | 0.032815438 | 0.021135955 |
| ENSG00000124469 | 0.020742548 | 0.026292209 | 0.026701478 | 0.018597476 |
| ENSG00000124370 | 0.035461168 | 0.034524337 | 0.035910961 | 0.029878655 |
| ENSG00000167230 | 0.016174844 | 0.025630605 | 0.02530964  | 0.0163408   |
| ENSG00000113569 | 0.01694987  | 0.025386496 | 0.025101116 | 0.015569285 |
| ENSG00000074266 | 0.033253205 | 0.039095486 | 0.033460411 | 0.025813573 |
| ENSG00000124564 | 0.015794334 | 0.024669061 | 0.025261959 | 0.016831648 |
| ENSG00000164256 | 0.01808022  | 0.027605204 | 0.028397738 | 0.016568742 |
| ENSG00000131043 | 0.026254609 | 0.038357814 | 0.043970699 | 0.027713042 |
| ENSG00000158639 | 0.01804644  | 0.027003887 | 0.025985548 | 0.016553053 |
| ENSG00000167139 | 0.016185712 | 0.025063067 | 0.024330561 | 0.014808785 |
| ENSG00000167895 | 0.041197761 | 0.054232387 | 0.043481305 | 0.037627944 |
| ENSG00000043355 | 0.018023095 | 0.024865771 | 0.02610207  | 0.017450828 |
| ENSG00000108588 | 0.026704596 | 0.032569237 | 0.029029282 | 0.027262829 |
| ENSG00000177108 | 0.015481524 | 0.024492429 | 0.024838662 | 0.015016651 |
| ENSG00000142961 | 0.015506983 | 0.025975983 | 0.025814151 | 0.014918395 |
| ENSG00000221926 | 0.032485669 | 0.038800901 | 0.039103972 | 0.032182952 |
| ENSG00000130204 | 0.031815018 | 0.032843096 | 0.035775896 | 0.036082778 |
| ENSG00000056277 | 0.035204911 | 0.033861465 | 0.031270807 | 0.026225091 |
| ENSG00000187048 | 0.017054023 | 0.026085089 | 0.024583807 | 0.017615423 |
| ENSG00000137193 | 0.065207849 | 0.05492716  | 0.046997216 | 0.053828195 |
| ENSG00000085491 | 0.037681943 | 0.029100929 | 0.027974467 | 0.019390559 |
| ENSG00000198087 | 0.053688023 | 0.059326204 | 0.041845842 | 0.090617669 |
| ENSG00000178882 | 0.018419896 | 0.025578967 | 0.02784341  | 0.015699691 |
| ENSG00000171160 | 0.042841793 | 0.047184635 | 0.037920603 | 0.042950045 |
| ENSG00000119640 | 0.036988204 | 0.034083664 | 0.036275749 | 0.040482926 |
| ENSG00000156515 | 0.017615306 | 0.027879652 | 0.026148019 | 0.017885937 |
| ENSG00000163626 | 0.028814511 | 0.031470532 | 0.028954561 | 0.021859381 |
| ENSG00000215009 | 0.015640715 | 0.02523398  | 0.024712952 | 0.014605429 |
| ENSG00000121988 | 0.017741925 | 0.025805771 | 0.024616446 | 0.015698476 |
| ENSG00000066427 | 0.037172182 | 0.041566279 | 0.03783536  | 0.034583802 |
| ENSG00000133112 | 0.0161849   | 0.024815678 | 0.025194637 | 0.017633061 |
| ENSG00000163217 | 0.016526787 | 0.026716225 | 0.026348048 | 0.016518445 |
| ENSG00000186583 | 0.029822292 | 0.032710713 | 0.031451826 | 0.024928964 |
| ENSG00000172209 | 0.015887494 | 0.025208777 | 0.025181989 | 0.014184632 |
| ENSG00000008405 | 0.078821085 | 0.065070976 | 0.053091874 | 0.065448666 |
| ENSG00000105971 | 0.067016748 | 0.057687315 | 0.051218589 | 0.019251075 |
| ENSG00000180834 | 0.036198821 | 0.035255195 | 0.0431736   | 0.034967173 |
| ENSG00000204815 | 0.025880338 | 0.030037955 | 0.02682994  | 0.025523079 |
| ENSG00000151773 | 0.018157352 | 0.025708209 | 0.025607493 | 0.016915767 |
| ENSG00000127580 | 0.019194317 | 0.028181033 | 0.028494654 | 0.022266831 |
| ENSG00000169154 | 0.015681965 | 0.024907316 | 0.024986594 | 0.015276965 |
| ENSG00000166292 | 0.039486296 | 0.032689545 | 0.037445626 | 0.051764015 |
| ENSG00000116176 | 0.016962234 | 0.02526699  | 0.024359475 | 0.016508358 |
| ENSG00000196189 | 0.041882331 | 0.048766691 | 0.048230141 | 0.040743233 |
| ENSG00000138069 | 0.021522574 | 0.029459388 | 0.031202387 | 0.022177537 |
| ENSG00000136280 | 0.029665054 | 0.034990603 | 0.036945315 | 0.026088808 |
| ENSG00000056736 | 0.110614721 | 0.080326494 | 0.081287674 | 0.101137443 |
| ENSG00000162695 | 0.030083505 | 0.034765498 | 0.038882819 | 0.029239669 |
| ENSG00000166326 | 0.025790741 | 0.032980775 | 0.029620944 | 0.023325715 |
| ENSG00000182853 | 0.01749477  | 0.025109562 | 0.026686759 | 0.016310867 |
| ENSG00000164107 | 0.01546831  | 0.024525586 | 0.024556842 | 0.014998059 |

|                 |             |             |             |             |
|-----------------|-------------|-------------|-------------|-------------|
| ENSG00000157107 | 0.021296607 | 0.028492809 | 0.026507819 | 0.022330783 |
| ENSG00000182934 | 0.025963117 | 0.031042956 | 0.036758068 | 0.029660031 |
| ENSG00000159398 | 0.017521663 | 0.026002698 | 0.024739177 | 0.014669675 |
| ENSG00000213588 | 0.020087255 | 0.029197402 | 0.027708573 | 0.017559305 |
| ENSG00000122787 | 0.016437518 | 0.024984319 | 0.025181447 | 0.015264615 |
| ENSG00000021574 | 0.023059763 | 0.028844008 | 0.027398583 | 0.021630115 |
| ENSG00000083168 | 0.02698163  | 0.031059633 | 0.032610914 | 0.02412522  |
| ENSG00000253846 | 0.017054366 | 0.026763455 | 0.025276228 | 0.016647426 |
| ENSG00000135837 | 0.028304695 | 0.035467061 | 0.032326978 | 0.028866063 |
| ENSG00000073598 | 0.015869292 | 0.024672287 | 0.023790159 | 0.014872444 |
| ENSG00000143185 | 0.148617157 | 0.136802821 | 0.130465001 | 0.144641035 |
| ENSG00000171163 | 0.042651321 | 0.046292733 | 0.037918754 | 0.03299579  |
| ENSG00000100311 | 0.01524148  | 0.025454884 | 0.025389339 | 0.015827367 |
| ENSG00000056291 | 0.014733451 | 0.024686991 | 0.024768208 | 0.015672894 |
| ENSG00000105507 | 0.015998755 | 0.024387068 | 0.02443824  | 0.014280803 |
| ENSG00000109083 | 0.025188447 | 0.03110809  | 0.034875363 | 0.021788606 |
| ENSG00000173258 | 0.017746832 | 0.024832315 | 0.026374932 | 0.015754898 |
| ENSG00000148498 | 0.036380064 | 0.035948889 | 0.035554549 | 0.035708931 |
| ENSG00000138640 | 0.075606725 | 0.061480958 | 0.049827283 | 0.06681908  |
| ENSG00000249915 | 0.019562593 | 0.028949755 | 0.027809197 | 0.021485894 |
| ENSG00000134440 | 0.027681594 | 0.030522161 | 0.029141874 | 0.02200279  |
| ENSG00000136286 | 0.030263202 | 0.030832696 | 0.036463192 | 0.028361649 |
| ENSG00000144713 | 0.014375577 | 0.024274996 | 0.024253927 | 0.015718597 |
| ENSG00000102078 | 0.027232251 | 0.033408661 | 0.03113814  | 0.025512449 |
| ENSG00000136877 | 0.03711762  | 0.041617344 | 0.037245247 | 0.0354217   |
| ENSG00000196139 | 0.02754551  | 0.026530949 | 0.024762525 | 0.018240901 |
| ENSG00000139926 | 0.091551293 | 0.054725704 | 0.047233389 | 0.084014519 |
| ENSG00000197208 | 0.022494969 | 0.026929881 | 0.025963644 | 0.019247866 |
| ENSG00000115977 | 0.015086182 | 0.026332078 | 0.024473829 | 0.015310073 |
| ENSG00000099795 | 0.024469089 | 0.028572326 | 0.02740563  | 0.019423193 |
| ENSG00000137275 | 0.032798972 | 0.039339083 | 0.044349014 | 0.030415462 |
| ENSG00000197084 | 0.084762865 | 0.047765979 | 0.038141449 | 0.056638617 |
| ENSG00000172660 | 0.02803902  | 0.033577875 | 0.031460881 | 0.025458559 |
| ENSG00000168781 | 0.028036221 | 0.039371981 | 0.037777715 | 0.02950674  |
| ENSG00000033030 | 0.031968456 | 0.035573957 | 0.032925374 | 0.024712497 |
| ENSG00000164961 | 0.029393433 | 0.03429584  | 0.028337642 | 0.026764587 |
| ENSG00000108479 | 0.042490397 | 0.036253779 | 0.030930366 | 0.025897761 |
| ENSG00000165059 | 0.016928812 | 0.026350658 | 0.024609564 | 0.016632501 |
| ENSG00000136003 | 0.026305321 | 0.030094159 | 0.028973449 | 0.022591802 |
| ENSG00000161888 | 0.050189121 | 0.036167156 | 0.036381477 | 0.032519221 |
| ENSG00000147874 | 0.039052305 | 0.039370771 | 0.034043966 | 0.046430782 |
| ENSG00000124140 | 0.016174803 | 0.024876815 | 0.02470898  | 0.014903803 |
| ENSG00000085998 | 0.030680253 | 0.0314541   | 0.029746183 | 0.025619288 |
| ENSG00000083720 | 0.039533939 | 0.039588928 | 0.033359039 | 0.033648675 |
| ENSG00000107984 | 0.017889843 | 0.025944058 | 0.025591106 | 0.017263787 |
| ENSG00000130881 | 0.035053164 | 0.031008031 | 0.037495586 | 0.019017057 |
| ENSG00000205403 | 0.018799175 | 0.025966121 | 0.025739069 | 0.01518561  |
| ENSG00000126804 | 0.023849391 | 0.033363135 | 0.032215691 | 0.026756547 |
| ENSG00000172320 | 0.018340381 | 0.025750009 | 0.025025189 | 0.015522724 |
| ENSG00000111729 | 0.071473998 | 0.070131732 | 0.050169833 | 0.108463487 |
| ENSG00000101290 | 0.033290027 | 0.036194758 | 0.033668464 | 0.029081284 |
| ENSG00000175040 | 0.05196421  | 0.045095014 | 0.044302135 | 0.057614323 |
| ENSG00000171649 | 0.050507438 | 0.048589569 | 0.054778534 | 0.042869213 |
| ENSG00000198848 | 0.017166542 | 0.026346072 | 0.028207603 | 0.015845138 |

|                 |             |             |             |             |
|-----------------|-------------|-------------|-------------|-------------|
| ENSG0000079101  | 0.017082454 | 0.025453163 | 0.024685261 | 0.015829057 |
| ENSG00000144596 | 0.017310179 | 0.027728844 | 0.024954074 | 0.016326333 |
| ENSG00000175868 | 0.017238724 | 0.025446627 | 0.025375987 | 0.015846132 |
| ENSG00000112874 | 0.079708844 | 0.062606879 | 0.039735441 | 0.065847997 |
| ENSG00000174606 | 0.031639694 | 0.035074728 | 0.032652824 | 0.029707669 |
| ENSG00000178175 | 0.016927958 | 0.025613206 | 0.025491191 | 0.016806119 |
| ENSG00000134046 | 0.014735696 | 0.024887612 | 0.025145873 | 0.016230427 |
| ENSG00000197381 | 0.032153174 | 0.030431082 | 0.025451937 | 0.01469685  |
| ENSG00000213949 | 0.052307591 | 0.051672797 | 0.039190371 | 0.050502561 |
| ENSG00000145087 | 0.015815821 | 0.025567746 | 0.025322607 | 0.0157773   |
| ENSG00000030304 | 0.015363031 | 0.023959376 | 0.024227586 | 0.014663111 |
| ENSG00000065361 | 0.016072111 | 0.025913253 | 0.023940233 | 0.013905802 |
| ENSG00000248099 | 0.034100442 | 0.033344136 | 0.031396569 | 0.030736533 |
| ENSG00000022267 | 0.102797137 | 0.074423006 | 0.081980241 | 0.100198062 |
| ENSG00000151657 | 0.025315589 | 0.030464911 | 0.034659704 | 0.029235473 |
| ENSG00000244509 | 0.030553007 | 0.033995638 | 0.032367286 | 0.028721181 |
| ENSG00000165757 | 0.019478279 | 0.024850575 | 0.025005118 | 0.015394181 |
| ENSG00000108961 | 0.026768387 | 0.029467108 | 0.030081758 | 0.019208302 |
| ENSG00000159387 | 0.022210956 | 0.028956181 | 0.027134242 | 0.01912015  |
| ENSG00000101391 | 0.026354621 | 0.030826676 | 0.029629935 | 0.021839912 |
| ENSG00000167671 | 0.031635174 | 0.037072105 | 0.036602024 | 0.029135713 |
| ENSG00000156795 | 0.034226475 | 0.033345921 | 0.03457617  | 0.026407964 |
| ENSG00000079156 | 0.016333615 | 0.026373997 | 0.02559204  | 0.016355937 |
| ENSG00000162959 | 0.023106614 | 0.031235121 | 0.0288582   | 0.021143443 |
| ENSG00000184434 | 0.017749228 | 0.026210185 | 0.024543088 | 0.016838296 |
| ENSG00000155542 | 0.046181007 | 0.057886466 | 0.047327578 | 0.052074596 |
| ENSG00000054598 | 0.021793612 | 0.027448721 | 0.027815935 | 0.018100815 |
| ENSG00000135164 | 0.025613826 | 0.035503912 | 0.032076108 | 0.021504398 |
| ENSG00000177535 | 0.015309    | 0.024892917 | 0.025548547 | 0.016160023 |
| ENSG00000198223 | 0.02753292  | 0.032124677 | 0.033117579 | 0.019510831 |
| ENSG00000129007 | 0.042844792 | 0.041427548 | 0.046376867 | 0.03885195  |
| ENSG00000171772 | 0.034941712 | 0.024761434 | 0.025685429 | 0.036892508 |
| ENSG00000132465 | 0.061793153 | 0.046386102 | 0.045897919 | 0.04025927  |
| ENSG00000089234 | 0.021688574 | 0.030092775 | 0.031869877 | 0.020604659 |
| ENSG00000189001 | 0.02355021  | 0.025809973 | 0.025157368 | 0.018287358 |
| ENSG00000166265 | 0.015573689 | 0.024842928 | 0.025642161 | 0.016578792 |
| ENSG00000197746 | 0.03394462  | 0.035152482 | 0.040134566 | 0.042030289 |
| ENSG00000204314 | 0.016104092 | 0.02558126  | 0.024437171 | 0.014950326 |
| ENSG00000029153 | 0.037008768 | 0.03736895  | 0.038138089 | 0.042243002 |
| ENSG00000085224 | 0.025414681 | 0.035994767 | 0.031002635 | 0.028507974 |
| ENSG00000108821 | 0.017151785 | 0.026531483 | 0.025076111 | 0.014036578 |
| ENSG00000060566 | 0.01653784  | 0.024639504 | 0.023847937 | 0.015166117 |
| ENSG00000126870 | 0.033737851 | 0.039657574 | 0.033075456 | 0.040347714 |
| ENSG00000138032 | 0.035698994 | 0.039257892 | 0.040051844 | 0.040830893 |
| ENSG00000167703 | 0.066611358 | 0.055769012 | 0.043756938 | 0.053960924 |
| ENSG00000165813 | 0.025393561 | 0.033838574 | 0.033298354 | 0.028664695 |
| ENSG00000007372 | 0.019646785 | 0.026187438 | 0.028045351 | 0.019545017 |
| ENSG00000185917 | 0.027209155 | 0.033928508 | 0.035144983 | 0.023935489 |
| ENSG00000023843 | 0.018224481 | 0.02526462  | 0.028572531 | 0.018792967 |
| ENSG00000072110 | 0.128311224 | 0.092451295 | 0.1000383   | 0.109845898 |
| ENSG00000177947 | 0.01745527  | 0.026024365 | 0.025579382 | 0.015883711 |
| ENSG00000101868 | 0.023835362 | 0.03221342  | 0.025563757 | 0.026239215 |
| ENSG00000082515 | 0.023495969 | 0.028422605 | 0.029993387 | 0.018868888 |
| ENSG00000133275 | 0.025874433 | 0.031355298 | 0.034496391 | 0.025574555 |



|                 |             |             |             |             |
|-----------------|-------------|-------------|-------------|-------------|
| ENSG00000174175 | 0.017688587 | 0.030393647 | 0.027413026 | 0.023264839 |
| ENSG00000100139 | 0.014932646 | 0.024826597 | 0.024651263 | 0.014164507 |
| ENSG00000070785 | 0.040671363 | 0.037655895 | 0.03088003  | 0.029987885 |
| ENSG00000163009 | 0.027157189 | 0.026122629 | 0.026862378 | 0.024433118 |
| ENSG00000124532 | 0.034420705 | 0.037094685 | 0.031962198 | 0.034479713 |
| ENSG00000177992 | 0.015303698 | 0.024591134 | 0.025295314 | 0.016093103 |
| ENSG00000160948 | 0.018558427 | 0.025289959 | 0.025400026 | 0.016938589 |
| ENSG00000233927 | 0.017951294 | 0.024608429 | 0.02674496  | 0.01967061  |
| ENSG00000151651 | 0.034754898 | 0.038411665 | 0.038610596 | 0.041651991 |
| ENSG00000113211 | 0.017505355 | 0.027907591 | 0.026936559 | 0.016510828 |
| ENSG00000105576 | 0.024306216 | 0.034820279 | 0.027457149 | 0.02842014  |
| ENSG00000146350 | 0.035421234 | 0.033935644 | 0.035262445 | 0.042717248 |
| ENSG00000165917 | 0.016212145 | 0.023842243 | 0.02511594  | 0.015648076 |
| ENSG00000162496 | 0.059311174 | 0.053347094 | 0.05028978  | 0.061284416 |
| ENSG00000001084 | 0.044185727 | 0.041016573 | 0.039167616 | 0.036406588 |
| ENSG00000174282 | 0.030417008 | 0.034751555 | 0.037180836 | 0.03032257  |
| ENSG00000106976 | 0.016590337 | 0.024927297 | 0.025570681 | 0.015151456 |
| ENSG00000159871 | 0.018526452 | 0.025797753 | 0.02626263  | 0.016570867 |
| ENSG00000164951 | 0.01628745  | 0.025337808 | 0.025151047 | 0.015326101 |
| ENSG00000112337 | 0.016820215 | 0.024944762 | 0.024506138 | 0.015983681 |
| ENSG00000166200 | 0.024553506 | 0.03099348  | 0.032821369 | 0.02141411  |
| ENSG00000159256 | 0.042619108 | 0.046435483 | 0.039425211 | 0.046446061 |
| ENSG00000158716 | 0.078722353 | 0.053297115 | 0.041138375 | 0.041650688 |
| ENSG00000159761 | 0.032143736 | 0.031301607 | 0.028193884 | 0.030143037 |
| ENSG00000115970 | 0.030168385 | 0.044413913 | 0.031921675 | 0.028079218 |
| ENSG00000135052 | 0.017852194 | 0.025878423 | 0.024765249 | 0.016843065 |
| ENSG00000109775 | 0.032424895 | 0.03019625  | 0.032085452 | 0.024739815 |
| ENSG00000109654 | 0.1007494   | 0.079262268 | 0.055966794 | 0.069673749 |
| ENSG00000100485 | 0.026251079 | 0.028658142 | 0.028543785 | 0.021554195 |
| ENSG00000127152 | 0.016249009 | 0.024836252 | 0.024413709 | 0.015287221 |
| ENSG00000163328 | 0.030687038 | 0.032093926 | 0.035644866 | 0.027959474 |
| ENSG00000184937 | 0.044185047 | 0.03291294  | 0.030718133 | 0.039792474 |
| ENSG00000111144 | 0.025406293 | 0.030529063 | 0.027257244 | 0.021954738 |
| ENSG00000177494 | 0.082828399 | 0.066865045 | 0.078745307 | 0.088178522 |
| ENSG00000073067 | 0.015826861 | 0.024852204 | 0.025059285 | 0.015239441 |
| ENSG00000160753 | 0.034937826 | 0.037266552 | 0.033749118 | 0.032489729 |
| ENSG00000147160 | 0.015648011 | 0.02505467  | 0.02570682  | 0.015228237 |
| ENSG00000132718 | 0.040183711 | 0.03634904  | 0.045902141 | 0.041524245 |
| ENSG00000124767 | 0.023506835 | 0.032754913 | 0.031059143 | 0.023612655 |
| ENSG00000065413 | 0.027267648 | 0.03050767  | 0.028058784 | 0.028970127 |
| ENSG00000072062 | 0.019786981 | 0.028829842 | 0.027225995 | 0.018885486 |
| ENSG00000164342 | 0.026649732 | 0.029304033 | 0.027191594 | 0.020564036 |
| ENSG00000123388 | 0.014936716 | 0.025067531 | 0.024095043 | 0.015063175 |
| ENSG00000221996 | 0.016644496 | 0.026292379 | 0.025869905 | 0.015321744 |
| ENSG00000169635 | 0.028741289 | 0.041602472 | 0.044118212 | 0.027182233 |
| ENSG00000094661 | 0.015590278 | 0.024198396 | 0.025158426 | 0.014200315 |
| ENSG00000151612 | 0.034914005 | 0.040048938 | 0.03560934  | 0.032613449 |
| ENSG00000161542 | 0.032527928 | 0.035875412 | 0.032538657 | 0.021854467 |
| ENSG00000135443 | 0.014292785 | 0.024523564 | 0.02593281  | 0.014611119 |
| ENSG00000185475 | 0.022700831 | 0.029362302 | 0.031946679 | 0.024642937 |
| ENSG00000138411 | 0.132187797 | 0.116380125 | 0.116973188 | 0.112432397 |
| ENSG00000140987 | 0.02353085  | 0.036385113 | 0.04172033  | 0.024767196 |
| ENSG00000133398 | 0.030489411 | 0.039218643 | 0.041030588 | 0.028230251 |
| ENSG00000175003 | 0.016859146 | 0.026105687 | 0.026014906 | 0.015144195 |

|                 |             |             |             |             |
|-----------------|-------------|-------------|-------------|-------------|
| ENSG00000108733 | 0.022765682 | 0.031803209 | 0.029356263 | 0.023172452 |
| ENSG00000023287 | 0.025894597 | 0.033449149 | 0.032954729 | 0.025487473 |
| ENSG00000099817 | 0.04987473  | 0.050879134 | 0.049184507 | 0.039570321 |
| ENSG00000116675 | 0.017062134 | 0.025329459 | 0.024933335 | 0.017830565 |
| ENSG00000162714 | 0.02215864  | 0.027114357 | 0.027186272 | 0.018241801 |
| ENSG00000148704 | 0.016578839 | 0.025373417 | 0.02535053  | 0.014818927 |
| ENSG00000165280 | 0.028863743 | 0.033831217 | 0.034902397 | 0.035484027 |
| ENSG00000198283 | 0.017645345 | 0.025824123 | 0.024852509 | 0.016575057 |
| ENSG00000140968 | 0.045009806 | 0.046754407 | 0.048463304 | 0.054478931 |
| ENSG00000073861 | 0.021974195 | 0.027797999 | 0.028928771 | 0.026491588 |
| ENSG00000213297 | 0.017351624 | 0.026114128 | 0.02612582  | 0.017111771 |
| ENSG00000087053 | 0.016676062 | 0.024931853 | 0.024952732 | 0.017131601 |
| ENSG00000198000 | 0.026041112 | 0.030330908 | 0.029756339 | 0.02098674  |
| ENSG00000183741 | 0.031496171 | 0.035838657 | 0.032455849 | 0.025491374 |
| ENSG00000135338 | 0.02383183  | 0.026378691 | 0.027122143 | 0.024435495 |
| ENSG00000145216 | 0.022938771 | 0.031813782 | 0.031269724 | 0.023887669 |
| ENSG00000165948 | 0.039230508 | 0.034895414 | 0.035502783 | 0.028942777 |
| ENSG00000115806 | 0.019792324 | 0.027852974 | 0.032084384 | 0.021670332 |
| ENSG00000101577 | 0.030352977 | 0.032800272 | 0.03350034  | 0.028343914 |
| ENSG00000162687 | 0.015596136 | 0.02507234  | 0.024603875 | 0.015289304 |
| ENSG00000250254 | 0.036741259 | 0.031863571 | 0.032872344 | 0.026931354 |
| ENSG00000112972 | 0.04032646  | 0.040381802 | 0.040885506 | 0.032437394 |
| ENSG00000133393 | 0.024879286 | 0.030136786 | 0.031801386 | 0.022948301 |
| ENSG00000139354 | 0.020938487 | 0.026398163 | 0.02572191  | 0.019658499 |
| ENSG00000011021 | 0.018979913 | 0.026349645 | 0.025604733 | 0.015553682 |
| ENSG00000122512 | 0.033603912 | 0.034190813 | 0.032245409 | 0.027621091 |
| ENSG00000143919 | 0.015786539 | 0.024999122 | 0.02446034  | 0.016476444 |
| ENSG00000244607 | 0.01518935  | 0.024931083 | 0.025243264 | 0.015198392 |
| ENSG00000100101 | 0.030926699 | 0.031296827 | 0.037519959 | 0.031392207 |
| ENSG00000177663 | 0.03062826  | 0.032755472 | 0.036819467 | 0.033369856 |
| ENSG00000127947 | 0.035373096 | 0.037783342 | 0.036662634 | 0.031894364 |
| ENSG00000106302 | 0.024080745 | 0.02819735  | 0.027652205 | 0.02234149  |
| ENSG00000046774 | 0.01663409  | 0.026070623 | 0.025748275 | 0.017119376 |
| ENSG00000165325 | 0.015456759 | 0.029260772 | 0.026407963 | 0.015031082 |
| ENSG00000178395 | 0.017617843 | 0.024679415 | 0.026490407 | 0.016632576 |
| ENSG00000177283 | 0.018496128 | 0.026496711 | 0.026613133 | 0.018027118 |
| ENSG00000167011 | 0.020566507 | 0.026818067 | 0.028013745 | 0.017719426 |
| ENSG00000163297 | 0.068688079 | 0.062383394 | 0.05752253  | 0.050605128 |
| ENSG00000151014 | 0.037704301 | 0.038390181 | 0.043063815 | 0.030516483 |
| ENSG00000105750 | 0.068681695 | 0.04965402  | 0.039942821 | 0.054927865 |
| ENSG00000168309 | 0.016232637 | 0.027275684 | 0.027700384 | 0.018240044 |
| ENSG00000104312 | 0.041486788 | 0.041047943 | 0.040594897 | 0.037225973 |
| ENSG00000161996 | 0.042119055 | 0.044355688 | 0.037172767 | 0.043059746 |
| ENSG00000175520 | 0.038900498 | 0.036423259 | 0.034245117 | 0.0358735   |
| ENSG00000068366 | 0.041881084 | 0.049096342 | 0.04125598  | 0.038797349 |
| ENSG00000108602 | 0.018720891 | 0.030126968 | 0.027851576 | 0.033502508 |
| ENSG00000083097 | 0.03266903  | 0.042943091 | 0.035526675 | 0.029591921 |
| ENSG00000085978 | 0.022422972 | 0.025147793 | 0.031888432 | 0.019197859 |
| ENSG00000104973 | 0.02977084  | 0.033872762 | 0.033664069 | 0.020821886 |
| ENSG00000144677 | 0.034810864 | 0.031633414 | 0.028104921 | 0.024984157 |
| ENSG00000153246 | 0.016003046 | 0.024914841 | 0.025222442 | 0.014883503 |
| ENSG00000006025 | 0.018780473 | 0.025215008 | 0.027624854 | 0.017340563 |
| ENSG00000101400 | 0.037326521 | 0.031631421 | 0.032976829 | 0.033627446 |
| ENSG00000173674 | 0.049337738 | 0.046894881 | 0.046352946 | 0.03410953  |

|                 |             |             |             |             |
|-----------------|-------------|-------------|-------------|-------------|
| ENSG00000119632 | 0.025647185 | 0.032767897 | 0.030213664 | 0.025601237 |
| ENSG00000125872 | 0.015875078 | 0.025906641 | 0.024716222 | 0.015228798 |
| ENSG00000163527 | 0.039762636 | 0.043650539 | 0.041910191 | 0.039844026 |
| ENSG00000196507 | 0.038800574 | 0.039542743 | 0.038167821 | 0.027694681 |
| ENSG00000198919 | 0.036930846 | 0.038900104 | 0.031591929 | 0.029743546 |
| ENSG00000153187 | 0.016046778 | 0.025186305 | 0.024480028 | 0.01464308  |
| ENSG00000197121 | 0.022823615 | 0.028580208 | 0.026902463 | 0.018957706 |
| ENSG00000140459 | 0.02174869  | 0.033708643 | 0.031755501 | 0.02178584  |
| ENSG00000146090 | 0.015478667 | 0.025207567 | 0.024956064 | 0.016224154 |
| ENSG00000028310 | 0.026700568 | 0.031252312 | 0.035509617 | 0.027134197 |
| ENSG00000213494 | 0.014864846 | 0.024749587 | 0.024629094 | 0.015687413 |
| ENSG00000178358 | 0.015794264 | 0.025188212 | 0.024464871 | 0.01588756  |
| ENSG00000165416 | 0.024100468 | 0.029194489 | 0.028231271 | 0.023747134 |
| ENSG00000166033 | 0.015841745 | 0.025338523 | 0.025922555 | 0.015390707 |
| ENSG00000126603 | 0.015415977 | 0.024945828 | 0.024086798 | 0.014631969 |
| ENSG00000178403 | 0.102758179 | 0.076010125 | 0.086209752 | 0.0899817   |
| ENSG00000150456 | 0.037758429 | 0.038088202 | 0.032475802 | 0.033376232 |
| ENSG00000163239 | 0.016772879 | 0.025782303 | 0.025376708 | 0.019162181 |
| ENSG00000120675 | 0.038379065 | 0.037364728 | 0.031621747 | 0.02295015  |
| ENSG00000125450 | 0.030625536 | 0.033442831 | 0.032634291 | 0.023940059 |
| ENSG00000185480 | 0.037840048 | 0.036718723 | 0.036988656 | 0.035004481 |
| ENSG00000079215 | 0.027852736 | 0.028378474 | 0.02560258  | 0.018168635 |
| ENSG00000128617 | 0.018583383 | 0.026291265 | 0.025485858 | 0.015754967 |
| ENSG00000104765 | 0.048916752 | 0.036203145 | 0.033873187 | 0.032005246 |
| ENSG00000174236 | 0.016647893 | 0.02568693  | 0.02447488  | 0.015727815 |
| ENSG00000186280 | 0.017152998 | 0.026167639 | 0.024935327 | 0.016382022 |
| ENSG00000166351 | 0.016687592 | 0.025606685 | 0.024946298 | 0.014630228 |
| ENSG00000160447 | 0.030199559 | 0.039867013 | 0.035131724 | 0.027042003 |
| ENSG00000244115 | 0.02884324  | 0.035528744 | 0.035098669 | 0.02625914  |
| ENSG00000180626 | 0.047454437 | 0.04663559  | 0.033210286 | 0.039507318 |
| ENSG00000157181 | 0.023944449 | 0.028679189 | 0.028798235 | 0.021104167 |
| ENSG00000110497 | 0.028604325 | 0.030818894 | 0.033531004 | 0.035937611 |
| ENSG00000203857 | 0.015394231 | 0.025659973 | 0.025317265 | 0.015643798 |
| ENSG00000166148 | 0.016445003 | 0.025188679 | 0.026720447 | 0.015832287 |
| ENSG00000055208 | 0.027246649 | 0.032675904 | 0.030650099 | 0.030083909 |
| ENSG00000168067 | 0.028515948 | 0.033320744 | 0.032490155 | 0.023282523 |
| ENSG00000172382 | 0.017424027 | 0.025406837 | 0.024966471 | 0.014374134 |
| ENSG00000157578 | 0.015225281 | 0.02480516  | 0.025164065 | 0.015783461 |
| ENSG00000198910 | 0.015724073 | 0.025485587 | 0.024977818 | 0.016350106 |
| ENSG00000172164 | 0.113628785 | 0.085400656 | 0.083112782 | 0.082596287 |
| ENSG00000189269 | 0.015926808 | 0.025990971 | 0.02497489  | 0.015824688 |
| ENSG00000163666 | 0.03472954  | 0.038583775 | 0.040250202 | 0.030472044 |
| ENSG00000223496 | 0.034928479 | 0.040207501 | 0.04784686  | 0.036059027 |
| ENSG00000182070 | 0.016221683 | 0.02616862  | 0.025285159 | 0.016449563 |
| ENSG00000112077 | 0.015905589 | 0.024635969 | 0.025298741 | 0.014447646 |
| ENSG00000132763 | 0.018122318 | 0.026854614 | 0.025437201 | 0.015361212 |
| ENSG00000077942 | 0.016891455 | 0.025230263 | 0.026298307 | 0.016718247 |
| ENSG00000196569 | 0.016386637 | 0.025848851 | 0.024859593 | 0.015491996 |
| ENSG00000160299 | 0.029830214 | 0.037747653 | 0.032506425 | 0.025659071 |
| ENSG00000136383 | 0.020988004 | 0.027335642 | 0.029333609 | 0.019619588 |
| ENSG00000186765 | 0.018089074 | 0.02631822  | 0.024852083 | 0.021609934 |
| ENSG00000162735 | 0.029329654 | 0.031556332 | 0.032833692 | 0.022501546 |
| ENSG00000142606 | 0.018794708 | 0.026552858 | 0.024854633 | 0.01725244  |
| ENSG00000113525 | 0.017669332 | 0.02759857  | 0.027887669 | 0.018014949 |

|                 |             |             |             |             |
|-----------------|-------------|-------------|-------------|-------------|
| ENSG00000170860 | 0.024407979 | 0.028023704 | 0.027324063 | 0.02024594  |
| ENSG00000138376 | 0.039590158 | 0.037739761 | 0.038414902 | 0.031617847 |
| ENSG00000096060 | 0.048919813 | 0.041943251 | 0.036785093 | 0.041901412 |
| ENSG00000185974 | 0.016555485 | 0.025541344 | 0.026035954 | 0.01608609  |
| ENSG00000149313 | 0.031762703 | 0.040393104 | 0.030165463 | 0.02725711  |
| ENSG00000146378 | 0.017182851 | 0.025863735 | 0.026959488 | 0.01674054  |
| ENSG00000144445 | 0.017081587 | 0.024740377 | 0.024846212 | 0.016035059 |
| ENSG00000133020 | 0.016582092 | 0.025527265 | 0.02484834  | 0.016299019 |
| ENSG00000152439 | 0.02005717  | 0.027735628 | 0.032490914 | 0.018482218 |
| ENSG00000148826 | 0.015151865 | 0.024384949 | 0.02533148  | 0.014451025 |
| ENSG00000120280 | 0.06528578  | 0.054778779 | 0.044894956 | 0.051194559 |
| ENSG00000138606 | 0.033069006 | 0.03319433  | 0.034190805 | 0.027120724 |
| ENSG00000155368 | 0.018857763 | 0.0251252   | 0.025198699 | 0.01611885  |
| ENSG00000182185 | 0.030621053 | 0.031869175 | 0.030649424 | 0.031206238 |
| ENSG00000085433 | 0.028048791 | 0.040062277 | 0.033994763 | 0.032207845 |
| ENSG00000144063 | 0.015237892 | 0.024406344 | 0.024238157 | 0.014032436 |
| ENSG00000089280 | 0.031079295 | 0.030322839 | 0.033743317 | 0.033164615 |
| ENSG00000160256 | 0.028245519 | 0.029774901 | 0.029069801 | 0.025986157 |
| ENSG00000130193 | 0.052704653 | 0.046786307 | 0.043535341 | 0.041379728 |
| ENSG00000125458 | 0.030345139 | 0.02931284  | 0.031580411 | 0.025590188 |
| ENSG00000184162 | 0.029321846 | 0.028678994 | 0.030713098 | 0.021065007 |
| ENSG00000239382 | 0.027174143 | 0.032883209 | 0.031686546 | 0.020590402 |
| ENSG00000105989 | 0.046958183 | 0.030181302 | 0.029862131 | 0.050311167 |
| ENSG00000215440 | 0.04398518  | 0.040615342 | 0.043522152 | 0.041306504 |
| ENSG00000137310 | 0.030217261 | 0.035841684 | 0.029646593 | 0.031143709 |
| ENSG00000165060 | 0.03070667  | 0.030367557 | 0.034027182 | 0.025945209 |
| ENSG00000111875 | 0.045149755 | 0.041728214 | 0.036478611 | 0.032766682 |
| ENSG00000153283 | 0.107683297 | 0.077647699 | 0.084676715 | 0.11508813  |
| ENSG00000170579 | 0.015825137 | 0.02499246  | 0.02520502  | 0.015067569 |
| ENSG00000204376 | 0.0180217   | 0.026966435 | 0.027964135 | 0.018919645 |
| ENSG00000155115 | 0.02957547  | 0.032624975 | 0.030499659 | 0.031180183 |
| ENSG00000115232 | 0.064405154 | 0.065417384 | 0.045264399 | 0.046671452 |
| ENSG00000183337 | 0.035079748 | 0.036831316 | 0.037327664 | 0.028894474 |
| ENSG00000169660 | 0.04389002  | 0.047211192 | 0.039206352 | 0.040206235 |
| ENSG00000182670 | 0.031615162 | 0.03386015  | 0.034857828 | 0.027960812 |
| ENSG00000197056 | 0.035594646 | 0.039338937 | 0.036885316 | 0.038658872 |
| ENSG00000065833 | 0.084462073 | 0.074135637 | 0.071618962 | 0.08828417  |
| ENSG00000120333 | 0.029267974 | 0.030844081 | 0.028431669 | 0.021162713 |
| ENSG00000079785 | 0.026637588 | 0.029345886 | 0.029699683 | 0.024138892 |
| ENSG00000143162 | 0.044957394 | 0.039845109 | 0.044879879 | 0.030879653 |
| ENSG00000166311 | 0.029152888 | 0.036428199 | 0.041666443 | 0.035071821 |
| ENSG00000176635 | 0.017598855 | 0.02495485  | 0.024904417 | 0.016092024 |
| ENSG00000075043 | 0.045855766 | 0.028763149 | 0.035939143 | 0.041644133 |
| ENSG00000204371 | 0.0309288   | 0.03536395  | 0.030580553 | 0.026830873 |
| ENSG00000137731 | 0.211043196 | 0.132501562 | 0.122784243 | 0.171088875 |
| ENSG00000181061 | 0.026414135 | 0.032526069 | 0.029306304 | 0.035056694 |
| ENSG00000174796 | 0.041289492 | 0.04452421  | 0.049096176 | 0.039136015 |
| ENSG00000119973 | 0.01681578  | 0.024426329 | 0.025290053 | 0.01673363  |
| ENSG00000168216 | 0.029301525 | 0.03659766  | 0.034007261 | 0.02411401  |
| ENSG00000243772 | 0.016014477 | 0.024549968 | 0.025225505 | 0.015176039 |
| ENSG00000136937 | 0.038121632 | 0.04016148  | 0.031403223 | 0.029274387 |
| ENSG00000059573 | 0.025082411 | 0.030797433 | 0.03008965  | 0.021307729 |
| ENSG00000172680 | 0.01740168  | 0.025414621 | 0.026977874 | 0.017339534 |
| ENSG00000168538 | 0.027566807 | 0.033859055 | 0.032176752 | 0.020894522 |

|                 |             |             |             |             |
|-----------------|-------------|-------------|-------------|-------------|
| ENSG00000120289 | 0.015762433 | 0.025160835 | 0.024915754 | 0.015042162 |
| ENSG00000137154 | 0.014939997 | 0.023958453 | 0.024304319 | 0.016204956 |
| ENSG00000006075 | 0.044501635 | 0.045536674 | 0.049597723 | 0.042792246 |
| ENSG00000184924 | 0.035758727 | 0.03756119  | 0.032189037 | 0.025965156 |
| ENSG00000136143 | 0.033643315 | 0.040808939 | 0.031638896 | 0.027458758 |
| ENSG00000111339 | 0.016239208 | 0.025476216 | 0.025220247 | 0.014900532 |
| ENSG00000077800 | 0.014991957 | 0.025457045 | 0.02419346  | 0.014315645 |
| ENSG00000136842 | 0.06074902  | 0.058643061 | 0.055244143 | 0.052043494 |
| ENSG00000147408 | 0.031592798 | 0.033794984 | 0.039334662 | 0.040710402 |
| ENSG00000136636 | 0.043946723 | 0.036659884 | 0.038890248 | 0.032313116 |
| ENSG00000050405 | 0.044930938 | 0.035804529 | 0.033777001 | 0.044040877 |
| ENSG00000105492 | 0.017473134 | 0.025987376 | 0.024899832 | 0.020678475 |
| ENSG00000188706 | 0.016606886 | 0.024923577 | 0.024703498 | 0.014396979 |
| ENSG00000174576 | 0.015994463 | 0.025741642 | 0.026932194 | 0.015935517 |
| ENSG00000100258 | 0.02681489  | 0.032391668 | 0.030812898 | 0.023440283 |
| ENSG00000148341 | 0.030075893 | 0.038224178 | 0.036267637 | 0.027574603 |
| ENSG00000167785 | 0.071838531 | 0.041106759 | 0.042778391 | 0.053235794 |
| ENSG00000243509 | 0.018633888 | 0.026976923 | 0.025941366 | 0.018319322 |
| ENSG00000164039 | 0.032242987 | 0.041620851 | 0.036949489 | 0.029541073 |
| ENSG00000168653 | 0.024554519 | 0.030851302 | 0.032321351 | 0.020580347 |
| ENSG00000067191 | 0.015124329 | 0.024354745 | 0.025348826 | 0.01476311  |
| ENSG00000197959 | 0.064618319 | 0.064887235 | 0.040482712 | 0.04137803  |
| ENSG00000010671 | 0.025802942 | 0.029534748 | 0.030775969 | 0.023429264 |
| ENSG00000010219 | 0.027535024 | 0.03067231  | 0.030644052 | 0.020854814 |
| ENSG00000143630 | 0.028394503 | 0.035133166 | 0.02782359  | 0.025376632 |
| ENSG00000181903 | 0.017697552 | 0.025224856 | 0.025042864 | 0.014927025 |
| ENSG00000122136 | 0.019291669 | 0.025978523 | 0.027735374 | 0.017092213 |
| ENSG00000146243 | 0.035884159 | 0.039725816 | 0.034279062 | 0.028665755 |
| ENSG00000178209 | 0.039850045 | 0.044313265 | 0.036436252 | 0.037430061 |
| ENSG00000083799 | 0.035820475 | 0.036230994 | 0.037433222 | 0.03503744  |
| ENSG00000164694 | 0.016881069 | 0.026277235 | 0.025037181 | 0.015286861 |
| ENSG00000103160 | 0.022871696 | 0.028003833 | 0.028852047 | 0.02206652  |
| ENSG00000167522 | 0.029127349 | 0.033083831 | 0.03756111  | 0.027833104 |
| ENSG00000162105 | 0.016091812 | 0.026248845 | 0.026354536 | 0.017099106 |
| ENSG00000184831 | 0.035542693 | 0.037222036 | 0.031489258 | 0.027195    |
| ENSG00000198208 | 0.05666256  | 0.03898369  | 0.043698286 | 0.037058692 |
| ENSG00000196235 | 0.022320609 | 0.031428507 | 0.040609336 | 0.02479211  |
| ENSG00000092758 | 0.081335877 | 0.089640359 | 0.092812358 | 0.101402962 |
| ENSG00000088682 | 0.02586667  | 0.031244619 | 0.030008509 | 0.022237669 |
| ENSG00000105855 | 0.029619132 | 0.040862017 | 0.033750597 | 0.028185289 |
| ENSG00000101158 | 0.029342357 | 0.030123467 | 0.032568668 | 0.026648507 |
| ENSG00000178591 | 0.015515026 | 0.025133581 | 0.025520318 | 0.016171551 |
| ENSG00000174123 | 0.042200713 | 0.051671198 | 0.058634069 | 0.042039906 |
| ENSG00000176903 | 0.042782707 | 0.038937926 | 0.036896215 | 0.035241114 |
| ENSG00000132498 | 0.015175858 | 0.02548729  | 0.025079701 | 0.017700823 |
| ENSG00000172243 | 0.015219167 | 0.02473021  | 0.024669598 | 0.015947256 |
| ENSG00000112167 | 0.033206031 | 0.034375435 | 0.035046833 | 0.02884873  |
| ENSG00000138231 | 0.032327876 | 0.034755958 | 0.038241791 | 0.029749671 |
| ENSG00000140479 | 0.029842018 | 0.033791363 | 0.031242982 | 0.035177916 |
| ENSG00000114346 | 0.043735658 | 0.034818378 | 0.035087194 | 0.036850854 |
| ENSG00000174327 | 0.018194221 | 0.026190014 | 0.025347733 | 0.018819968 |
| ENSG00000082175 | 0.016618689 | 0.025312205 | 0.025096097 | 0.015191634 |
| ENSG00000148482 | 0.029129583 | 0.02568323  | 0.025513197 | 0.015822662 |
| ENSG00000175161 | 0.019971036 | 0.024871837 | 0.024742973 | 0.015658181 |

|                 |             |             |             |             |
|-----------------|-------------|-------------|-------------|-------------|
| ENSG0000006071  | 0.016381013 | 0.026611228 | 0.025756398 | 0.01642093  |
| ENSG00000198369 | 0.05124871  | 0.053930404 | 0.049248299 | 0.055100164 |
| ENSG00000131981 | 0.053270749 | 0.046800778 | 0.048078286 | 0.058358364 |
| ENSG00000179399 | 0.046208115 | 0.033843217 | 0.026850179 | 0.021342796 |
| ENSG00000171303 | 0.017584562 | 0.026204432 | 0.02530869  | 0.017204343 |
| ENSG00000067715 | 0.017196273 | 0.025315344 | 0.024774116 | 0.017435914 |
| ENSG00000135241 | 0.018084524 | 0.027966026 | 0.024457464 | 0.018999282 |
| ENSG00000137463 | 0.015976877 | 0.025221094 | 0.025764657 | 0.015945742 |
| ENSG00000113649 | 0.025794078 | 0.029282492 | 0.028862346 | 0.021664664 |
| ENSG00000135452 | 0.029980854 | 0.03460027  | 0.034349672 | 0.025826194 |
| ENSG00000099810 | 0.03468355  | 0.034602048 | 0.02939473  | 0.04731647  |
| ENSG00000161609 | 0.021228046 | 0.027210365 | 0.027610972 | 0.023990718 |
| ENSG00000178741 | 0.017641195 | 0.026160894 | 0.026441628 | 0.019310206 |
| ENSG00000168461 | 0.094764144 | 0.08720413  | 0.088378106 | 0.085564009 |
| ENSG00000243696 | 0.01907804  | 0.026238437 | 0.026544164 | 0.017195354 |
| ENSG00000120694 | 0.045338661 | 0.050660925 | 0.040863301 | 0.037492541 |
| ENSG00000166006 | 0.021231195 | 0.027926803 | 0.027008594 | 0.019167389 |
| ENSG00000129675 | 0.051044501 | 0.042522071 | 0.039647333 | 0.037209651 |
| ENSG00000197619 | 0.036623963 | 0.047504818 | 0.049196678 | 0.028132176 |
| ENSG00000058866 | 0.036059745 | 0.031621934 | 0.031551868 | 0.026568163 |
| ENSG00000152766 | 0.030082956 | 0.029421533 | 0.02854329  | 0.023006494 |
| ENSG00000134668 | 0.016847318 | 0.025198565 | 0.025583861 | 0.016523429 |
| ENSG00000012983 | 0.034351849 | 0.037826518 | 0.036624465 | 0.035513228 |
| ENSG00000152670 | 0.016316313 | 0.024785286 | 0.024831114 | 0.015137073 |
| ENSG00000119715 | 0.016963828 | 0.026471696 | 0.026404058 | 0.015249427 |
| ENSG00000008735 | 0.016071929 | 0.02507406  | 0.025276975 | 0.015334243 |
| ENSG00000182264 | 0.015388245 | 0.02440428  | 0.024734199 | 0.01568072  |
| ENSG00000114388 | 0.030397659 | 0.03458903  | 0.033078776 | 0.0232897   |
| ENSG00000124935 | 0.015613806 | 0.025390963 | 0.024931316 | 0.015241039 |
| ENSG00000141441 | 0.041395829 | 0.02597401  | 0.024609313 | 0.01639624  |
| ENSG00000169393 | 0.016093058 | 0.025045374 | 0.025344346 | 0.015272998 |
| ENSG00000105641 | 0.015625557 | 0.024932547 | 0.026562114 | 0.014985866 |
| ENSG00000158055 | 0.068404322 | 0.039151133 | 0.029583339 | 0.039819212 |
| ENSG00000155744 | 0.033702524 | 0.038380921 | 0.036388933 | 0.030374178 |
| ENSG00000010030 | 0.041022058 | 0.04822527  | 0.037334985 | 0.047491116 |
| ENSG00000099984 | 0.015885354 | 0.025672734 | 0.025728982 | 0.015856442 |
| ENSG00000116205 | 0.026453257 | 0.043638323 | 0.032959468 | 0.035397229 |
| ENSG00000198765 | 0.016907693 | 0.024970791 | 0.025052282 | 0.015410978 |
| ENSG00000172007 | 0.020079142 | 0.02710892  | 0.02986789  | 0.020125749 |
| ENSG00000151665 | 0.027803496 | 0.033705146 | 0.031199329 | 0.02283934  |
| ENSG00000141258 | 0.031083111 | 0.034642134 | 0.041734854 | 0.030901825 |
| ENSG00000140718 | 0.027638936 | 0.032332708 | 0.034765234 | 0.02343982  |
| ENSG00000100372 | 0.044630869 | 0.043217983 | 0.039291056 | 0.041636042 |
| ENSG00000170234 | 0.020103484 | 0.030957291 | 0.026888526 | 0.02169343  |
| ENSG00000174156 | 0.016348501 | 0.025550577 | 0.024666804 | 0.014415585 |
| ENSG00000162738 | 0.044904336 | 0.045499192 | 0.027399747 | 0.029887008 |
| ENSG00000242173 | 0.014953806 | 0.025187724 | 0.024770369 | 0.015034935 |
| ENSG00000116117 | 0.014568118 | 0.024365374 | 0.026402096 | 0.014934558 |
| ENSG00000181638 | 0.017072676 | 0.025106224 | 0.02474936  | 0.015710699 |
| ENSG00000105875 | 0.047325252 | 0.039847738 | 0.036437053 | 0.039255981 |
| ENSG00000183093 | 0.026253016 | 0.028556539 | 0.027719056 | 0.02175146  |
| ENSG00000172348 | 0.015509576 | 0.024320119 | 0.025132091 | 0.016056396 |
| ENSG00000163577 | 0.05533973  | 0.046072601 | 0.037967341 | 0.033859178 |
| ENSG00000124256 | 0.069501768 | 0.064870853 | 0.064210647 | 0.067150085 |

|                 |             |             |             |             |
|-----------------|-------------|-------------|-------------|-------------|
| ENSG00000164292 | 0.088650382 | 0.063994093 | 0.064287705 | 0.070389246 |
| ENSG00000183778 | 0.017898082 | 0.025625359 | 0.024755216 | 0.016373925 |
| ENSG00000161911 | 0.017859871 | 0.028406026 | 0.026250761 | 0.018927486 |
| ENSG00000123171 | 0.015363872 | 0.024454269 | 0.024817208 | 0.014514418 |
| ENSG00000148303 | 0.015839602 | 0.02452774  | 0.0246125   | 0.015516439 |
| ENSG00000120093 | 0.040935005 | 0.03913736  | 0.033926998 | 0.034857321 |
| ENSG00000147852 | 0.083492475 | 0.07897495  | 0.059333949 | 0.058512968 |
| ENSG00000213337 | 0.028757415 | 0.032534727 | 0.032303335 | 0.028103466 |
| ENSG00000166402 | 0.015843059 | 0.025209845 | 0.0267215   | 0.015989812 |
| ENSG00000121440 | 0.017512287 | 0.032201951 | 0.02536622  | 0.01583481  |
| ENSG00000198759 | 0.045436559 | 0.027678372 | 0.031276862 | 0.036069242 |
| ENSG00000118816 | 0.019444544 | 0.025972885 | 0.028487309 | 0.019582939 |
| ENSG00000250571 | 0.031795927 | 0.031255674 | 0.029114958 | 0.026469086 |
| ENSG00000081842 | 0.016437475 | 0.02452375  | 0.024475816 | 0.016512413 |
| ENSG00000198315 | 0.015705711 | 0.024586341 | 0.02583606  | 0.016582256 |
| ENSG00000114391 | 0.013758482 | 0.023706023 | 0.023918733 | 0.015074674 |
| ENSG00000166704 | 0.032401047 | 0.037851637 | 0.030675837 | 0.023882629 |
| ENSG00000091157 | 0.031721167 | 0.038762513 | 0.033219587 | 0.026447847 |
| ENSG00000143324 | 0.035269823 | 0.03756084  | 0.031842722 | 0.025555559 |
| ENSG00000077420 | 0.029628687 | 0.032608321 | 0.032828862 | 0.034490592 |
| ENSG00000103257 | 0.056907448 | 0.048994295 | 0.05170032  | 0.063755267 |
| ENSG00000121207 | 0.016655368 | 0.024994837 | 0.02684906  | 0.015719611 |
| ENSG00000126456 | 0.024480636 | 0.03130301  | 0.033612494 | 0.025227472 |
| ENSG00000121895 | 0.055270987 | 0.052175782 | 0.054437086 | 0.049992127 |
| ENSG00000186130 | 0.031046435 | 0.038094115 | 0.032066441 | 0.024255001 |
| ENSG00000010072 | 0.03826791  | 0.04238601  | 0.046334823 | 0.041871905 |
| ENSG00000197646 | 0.049689704 | 0.045329131 | 0.038401345 | 0.040129923 |
| ENSG00000036257 | 0.019279641 | 0.026206974 | 0.025926389 | 0.016731079 |
| ENSG00000182521 | 0.015155747 | 0.026964022 | 0.024442339 | 0.015691564 |
| ENSG00000126733 | 0.015860702 | 0.025293185 | 0.026599321 | 0.016786188 |
| ENSG00000183166 | 0.018418796 | 0.025256785 | 0.026461311 | 0.015245286 |
| ENSG00000103275 | 0.018563338 | 0.02788605  | 0.025838246 | 0.018810905 |
| ENSG00000182492 | 0.014732784 | 0.025113754 | 0.025160115 | 0.014991199 |
| ENSG00000179222 | 0.030698957 | 0.032242099 | 0.035485472 | 0.029657662 |
| ENSG00000108511 | 0.01740953  | 0.025144803 | 0.026141893 | 0.014588151 |
| ENSG00000170465 | 0.018024243 | 0.026418581 | 0.024695417 | 0.016452995 |
| ENSG00000077152 | 0.03973838  | 0.034052588 | 0.030971324 | 0.029645084 |
| ENSG00000206069 | 0.016651329 | 0.025745173 | 0.025994738 | 0.016790895 |
| ENSG00000142556 | 0.034796229 | 0.035676058 | 0.044694692 | 0.028752785 |
| ENSG00000183495 | 0.016601658 | 0.026733467 | 0.026046231 | 0.015849348 |
| ENSG00000128951 | 0.051949263 | 0.045972515 | 0.038560665 | 0.039243979 |
| ENSG00000156709 | 0.031125244 | 0.035229112 | 0.031194226 | 0.028951977 |
| ENSG00000102043 | 0.014893844 | 0.024892033 | 0.025243284 | 0.016107067 |
| ENSG00000164182 | 0.028590857 | 0.030961777 | 0.031192808 | 0.029446729 |
| ENSG00000172062 | 0.034894881 | 0.034475942 | 0.03247658  | 0.031984946 |
| ENSG00000197757 | 0.017810843 | 0.025925805 | 0.027142307 | 0.015141262 |
| ENSG00000064102 | 0.036493172 | 0.043861362 | 0.033801893 | 0.027070647 |
| ENSG00000126266 | 0.019575522 | 0.026328682 | 0.028460875 | 0.033919285 |
| ENSG00000127252 | 0.015787526 | 0.025276378 | 0.024331706 | 0.014797984 |
| ENSG00000186532 | 0.033947644 | 0.037696139 | 0.037121951 | 0.028859552 |
| ENSG00000138722 | 0.037291056 | 0.028428982 | 0.025747661 | 0.019272004 |
| ENSG00000149451 | 0.014910157 | 0.024551236 | 0.025230313 | 0.01564407  |
| ENSG00000173391 | 0.036195134 | 0.02592584  | 0.026171204 | 0.020720496 |
| ENSG00000124479 | 0.017334248 | 0.025516133 | 0.024812892 | 0.016396115 |

|                 |             |             |             |             |
|-----------------|-------------|-------------|-------------|-------------|
| ENSG00000168679 | 0.017974169 | 0.031388584 | 0.025729314 | 0.021073751 |
| ENSG00000197415 | 0.018161477 | 0.02466792  | 0.025200466 | 0.017595545 |
| ENSG00000143340 | 0.016890416 | 0.026565748 | 0.024554369 | 0.017648926 |
| ENSG00000130561 | 0.019805651 | 0.026203901 | 0.025308153 | 0.017163367 |
| ENSG00000198836 | 0.029266131 | 0.033842529 | 0.03094025  | 0.037726352 |
| ENSG00000131876 | 0.026345579 | 0.030124408 | 0.031071054 | 0.024872298 |
| ENSG00000138442 | 0.032666748 | 0.033905341 | 0.029569873 | 0.028333426 |
| ENSG00000173976 | 0.016455834 | 0.024747113 | 0.026126219 | 0.016196996 |
| ENSG00000005156 | 0.016493371 | 0.025835777 | 0.025037147 | 0.01600769  |
| ENSG00000166839 | 0.089906051 | 0.048335511 | 0.048657722 | 0.052347459 |
| ENSG00000014257 | 0.085833466 | 0.067125771 | 0.058125932 | 0.0637496   |
| ENSG00000133703 | 0.017157096 | 0.025946756 | 0.024894486 | 0.015929297 |
| ENSG00000151233 | 0.02427575  | 0.031951336 | 0.031699774 | 0.025142256 |
| ENSG00000040608 | 0.017584332 | 0.02697498  | 0.027056812 | 0.024556966 |
| ENSG00000110881 | 0.015140669 | 0.025440651 | 0.025249295 | 0.015830821 |
| ENSG00000178252 | 0.022610029 | 0.027177595 | 0.031360912 | 0.019505092 |
| ENSG00000151131 | 0.023105848 | 0.030929459 | 0.032215143 | 0.022224435 |
| ENSG00000162383 | 0.01772203  | 0.025749088 | 0.0256758   | 0.018567149 |
| ENSG00000198517 | 0.013981161 | 0.025619486 | 0.024675437 | 0.01594043  |
| ENSG00000135446 | 0.026735746 | 0.030196387 | 0.030724513 | 0.026660272 |
| ENSG00000122873 | 0.04046881  | 0.041258946 | 0.035819431 | 0.030773955 |
| ENSG00000027697 | 0.046772502 | 0.054699309 | 0.057076634 | 0.055295841 |
| ENSG00000112367 | 0.030158549 | 0.030859214 | 0.031698905 | 0.029871657 |
| ENSG00000053747 | 0.014983493 | 0.024393805 | 0.024684191 | 0.015492082 |
| ENSG00000174417 | 0.017952511 | 0.024996828 | 0.025404906 | 0.018554501 |
| ENSG00000151135 | 0.031458229 | 0.031286042 | 0.033329916 | 0.026089622 |
| ENSG00000091136 | 0.059780809 | 0.070573984 | 0.054520278 | 0.057003617 |
| ENSG00000152700 | 0.032522352 | 0.038530617 | 0.037695734 | 0.030010436 |
| ENSG00000090861 | 0.026612647 | 0.029536409 | 0.030333565 | 0.024201189 |
| ENSG00000196821 | 0.031173184 | 0.032072509 | 0.034757013 | 0.028025502 |
| ENSG00000101193 | 0.024709421 | 0.029592927 | 0.03490815  | 0.019077057 |
| ENSG00000112659 | 0.027828562 | 0.032122899 | 0.030173645 | 0.025604801 |
| ENSG00000179813 | 0.015455468 | 0.024980678 | 0.025555737 | 0.015656688 |
| ENSG00000123178 | 0.030610746 | 0.035797617 | 0.032507763 | 0.023383976 |
| ENSG00000189280 | 0.014775028 | 0.024924833 | 0.02433362  | 0.015050756 |
| ENSG00000156076 | 0.014868791 | 0.025141916 | 0.024549179 | 0.015782571 |
| ENSG00000166562 | 0.027895782 | 0.03035591  | 0.029703123 | 0.03053857  |
| ENSG00000156127 | 0.043520724 | 0.037369302 | 0.036873131 | 0.030172941 |
| ENSG00000155066 | 0.01927578  | 0.026745493 | 0.029257427 | 0.017441824 |
| ENSG00000081692 | 0.02301431  | 0.026862601 | 0.028487126 | 0.020448762 |
| ENSG00000143373 | 0.017274149 | 0.027009931 | 0.026961893 | 0.017289976 |
| ENSG00000104872 | 0.025275461 | 0.029354438 | 0.030463249 | 0.018939806 |
| ENSG00000065485 | 0.041546848 | 0.033674956 | 0.040501286 | 0.042410023 |
| ENSG00000250799 | 0.019473352 | 0.025260969 | 0.025477025 | 0.016448923 |
| ENSG00000079819 | 0.063866865 | 0.049653077 | 0.051603333 | 0.050651206 |
| ENSG00000158473 | 0.01641089  | 0.026062968 | 0.024878481 | 0.03248995  |
| ENSG00000167618 | 0.014854897 | 0.024865677 | 0.024525109 | 0.014202414 |
| ENSG00000010278 | 0.118333527 | 0.072473697 | 0.085041444 | 0.086210548 |
| ENSG00000164520 | 0.016346749 | 0.025171909 | 0.02537173  | 0.015257039 |
| ENSG00000165731 | 0.015699112 | 0.024948634 | 0.025011315 | 0.016404517 |
| ENSG00000041515 | 0.016869624 | 0.024766326 | 0.024407941 | 0.016967489 |
| ENSG00000044012 | 0.015185889 | 0.024779212 | 0.026032316 | 0.015187309 |
| ENSG00000182952 | 0.026476038 | 0.030461387 | 0.030818382 | 0.023639561 |
| ENSG00000136463 | 0.028466987 | 0.032803052 | 0.03420136  | 0.026910989 |



|                 |             |             |              |             |
|-----------------|-------------|-------------|--------------|-------------|
| ENSG00000141034 | 0.014456082 | 0.024398552 | 0.024406236  | 0.014786594 |
| ENSG00000159917 | 0.035588002 | 0.046943471 | 0.052019162  | 0.038196222 |
| ENSG00000179604 | 0.069814649 | 0.055253731 | 0.04522177   | 0.059782249 |
| ENSG00000110025 | 0.038763798 | 0.042325452 | 0.03836035   | 0.032060187 |
| ENSG00000166558 | 0.017565061 | 0.026436125 | 0.024442623  | 0.014740642 |
| ENSG00000155495 | 0.015603408 | 0.024742068 | 0.025041642  | 0.015515237 |
| ENSG00000143954 | 0.018868239 | 0.027736734 | 0.026778101  | 0.017904865 |
| ENSG00000165490 | 0.044210501 | 0.036163508 | 0.037629571  | 0.04035155  |
| ENSG00000119335 | 0.022969423 | 0.028129703 | 0.026559139  | 0.021286523 |
| ENSG00000112293 | 0.019074389 | 0.027388588 | 0.026291736  | 0.017015245 |
| ENSG00000113312 | 0.025069635 | 0.030125884 | 0.031047751  | 0.022344849 |
| ENSG00000119013 | 0.031263093 | 0.037296891 | 0.0293262    | 0.024614396 |
| ENSG00000100897 | 0.023372184 | 0.035931697 | 0.03128879   | 0.035819867 |
| ENSG00000135775 | 0.028782272 | 0.033239172 | 0.033270663  | 0.028067586 |
| ENSG00000104824 | 0.030729315 | 0.033246511 | 0.031490412  | 0.02760244  |
| ENSG00000160321 | 0.016849791 | 0.025827129 | 0.025732422  | 0.016889424 |
| ENSG00000173207 | 0.032601011 | 0.030766594 | 0.029165491  | 0.022051466 |
| ENSG00000171490 | 0.024954906 | 0.029613275 | 0.029099022  | 0.021329238 |
| ENSG00000171723 | 0.033048282 | 0.040910764 | 0.035072139  | 0.034748618 |
| ENSG00000153291 | 0.01795711  | 0.02649985  | 0.025684516  | 0.018233927 |
| ENSG00000130433 | 0.017073426 | 0.024988453 | 0.025005305  | 0.016277535 |
| ENSG00000155508 | 0.027799136 | 0.035579179 | 0.030934079  | 0.023533165 |
| ENSG00000169575 | 0.016214452 | 0.025361968 | 0.025033201  | 0.014592689 |
| ENSG00000108622 | 0.035377367 | 0.032408611 | 0.034967364  | 0.034849864 |
| ENSG00000102119 | 0.024673092 | 0.030162385 | 0.0303558761 | 0.02127809  |
| ENSG00000037042 | 0.035733476 | 0.036134624 | 0.034722204  | 0.041853375 |
| ENSG00000204130 | 0.021309236 | 0.030215536 | 0.027967914  | 0.020754855 |
| ENSG00000046653 | 0.027364108 | 0.029949162 | 0.028408102  | 0.020955422 |
| ENSG00000176798 | 0.014799445 | 0.024211123 | 0.025183165  | 0.0151283   |
| ENSG00000086598 | 0.029990675 | 0.034641754 | 0.037363156  | 0.027840381 |
| ENSG00000102172 | 0.026600766 | 0.036733089 | 0.030784431  | 0.025787365 |
| ENSG00000107201 | 0.048625438 | 0.063059049 | 0.050503298  | 0.049732814 |
| ENSG00000114745 | 0.027778502 | 0.032455009 | 0.034091955  | 0.027626737 |
| ENSG00000106462 | 0.032999147 | 0.032519701 | 0.030317777  | 0.026001469 |
| ENSG00000170953 | 0.015834976 | 0.025409098 | 0.024953002  | 0.016171728 |
| ENSG00000169241 | 0.027928669 | 0.029891714 | 0.031724231  | 0.023858593 |
| ENSG00000130303 | 0.028081915 | 0.041886157 | 0.036976029  | 0.031767361 |
| ENSG00000240849 | 0.034210799 | 0.037797585 | 0.034527008  | 0.035834505 |
| ENSG00000165138 | 0.018137972 | 0.026831123 | 0.025775774  | 0.016972406 |
| ENSG00000125522 | 0.103016382 | 0.084344674 | 0.083526387  | 0.091724894 |
| ENSG00000126583 | 0.015339047 | 0.024491322 | 0.024632786  | 0.014047888 |
| ENSG00000131732 | 0.025397332 | 0.030377709 | 0.029697385  | 0.01926758  |
| ENSG00000131037 | 0.015192109 | 0.025434887 | 0.02527881   | 0.014651522 |
| ENSG00000153956 | 0.016470635 | 0.02512613  | 0.025201488  | 0.016702339 |
| ENSG00000206527 | 0.030562996 | 0.036571804 | 0.03378799   | 0.028026044 |
| ENSG00000177707 | 0.016677878 | 0.025813035 | 0.0239836    | 0.016307891 |
| ENSG00000136694 | 0.016826137 | 0.024141193 | 0.024383438  | 0.014771396 |
| ENSG00000116273 | 0.026799178 | 0.039158925 | 0.038455425  | 0.025697039 |
| ENSG00000138398 | 0.024704791 | 0.031113263 | 0.033368903  | 0.034161456 |
| ENSG00000160058 | 0.025756551 | 0.030073614 | 0.032805289  | 0.022845014 |
| ENSG00000047346 | 0.050244204 | 0.043109222 | 0.041104063  | 0.035603776 |
| ENSG00000165630 | 0.023537691 | 0.031156021 | 0.03405093   | 0.02971349  |
| ENSG00000169429 | 0.14514876  | 0.112330592 | 0.104988304  | 0.096369395 |
| ENSG00000100029 | 0.032867178 | 0.034137388 | 0.031853112  | 0.030344077 |

|                 |             |             |             |             |
|-----------------|-------------|-------------|-------------|-------------|
| ENSG00000134285 | 0.045796345 | 0.043254285 | 0.044322421 | 0.051709964 |
| ENSG00000169515 | 0.016374828 | 0.025205572 | 0.025098695 | 0.015950628 |
| ENSG00000115275 | 0.022193553 | 0.028931707 | 0.03287581  | 0.024661677 |
| ENSG00000171960 | 0.03098451  | 0.031634629 | 0.029931098 | 0.026150919 |
| ENSG00000123975 | 0.036166707 | 0.034290398 | 0.031036761 | 0.0240352   |
| ENSG00000105810 | 0.016454648 | 0.025344092 | 0.025114171 | 0.016498215 |
| ENSG00000111913 | 0.04864511  | 0.048775483 | 0.049931509 | 0.042064251 |
| ENSG00000165269 | 0.01473041  | 0.024768846 | 0.024590918 | 0.014363274 |
| ENSG00000160404 | 0.0237869   | 0.027653956 | 0.026274227 | 0.019862614 |
| ENSG00000082269 | 0.042399242 | 0.042615905 | 0.035451188 | 0.038176908 |
| ENSG00000183607 | 0.017698951 | 0.026459236 | 0.027626479 | 0.015721933 |
| ENSG00000080293 | 0.017293328 | 0.026106506 | 0.025355355 | 0.01668259  |
| ENSG00000125735 | 0.056215231 | 0.040114003 | 0.045045569 | 0.054606412 |
| ENSG00000148985 | 0.027744519 | 0.028349782 | 0.031900159 | 0.030417837 |
| ENSG00000119457 | 0.014051634 | 0.025076184 | 0.024546617 | 0.015034308 |
| ENSG00000166963 | 0.018351334 | 0.025612526 | 0.024610651 | 0.015050364 |
| ENSG00000176533 | 0.018060062 | 0.02568538  | 0.025476714 | 0.019200237 |
| ENSG00000118491 | 0.028495805 | 0.028297295 | 0.028603932 | 0.026029228 |
| ENSG00000172426 | 0.018510526 | 0.026586578 | 0.024465596 | 0.023523032 |
| ENSG00000204687 | 0.015285804 | 0.024509455 | 0.0248109   | 0.0153694   |
| ENSG00000121577 | 0.026507255 | 0.028648133 | 0.027653787 | 0.019331824 |
| ENSG00000166226 | 0.025748481 | 0.029828957 | 0.027734746 | 0.026814962 |
| ENSG00000182759 | 0.016559905 | 0.025104833 | 0.024089179 | 0.015006758 |
| ENSG00000174437 | 0.032554654 | 0.032660584 | 0.038228058 | 0.03485626  |
| ENSG00000107815 | 0.042343821 | 0.043639145 | 0.048486218 | 0.045357254 |
| ENSG00000135899 | 0.038699982 | 0.038609809 | 0.038866589 | 0.048212982 |
| ENSG00000108786 | 0.016082006 | 0.024443543 | 0.024849317 | 0.015933856 |
| ENSG00000115966 | 0.027861289 | 0.033078154 | 0.035439928 | 0.025228606 |
| ENSG00000182885 | 0.016567846 | 0.025772101 | 0.026986506 | 0.01912093  |
| ENSG00000107625 | 0.027083428 | 0.031394186 | 0.031913086 | 0.021412912 |
| ENSG00000243978 | 0.030685482 | 0.030939125 | 0.025947467 | 0.020736894 |
| ENSG00000121848 | 0.022210594 | 0.032984371 | 0.037936488 | 0.025844428 |
| ENSG00000086289 | 0.111326842 | 0.1003186   | 0.08732898  | 0.106539413 |
| ENSG00000067798 | 0.016599576 | 0.025566204 | 0.025305748 | 0.015170534 |
| ENSG00000128340 | 0.021913178 | 0.02813611  | 0.030943128 | 0.02641483  |
| ENSG00000187969 | 0.015751117 | 0.024475008 | 0.026114642 | 0.015097741 |
| ENSG00000140280 | 0.035360479 | 0.040946368 | 0.038922434 | 0.043770741 |
| ENSG00000155974 | 0.017430615 | 0.026614367 | 0.025491268 | 0.019267031 |
| ENSG00000125812 | 0.023998459 | 0.035305627 | 0.038754239 | 0.024799394 |
| ENSG00000164399 | 0.014621211 | 0.024503912 | 0.024762634 | 0.014984199 |
| ENSG00000162444 | 0.025124831 | 0.041581138 | 0.034271957 | 0.030238129 |
| ENSG00000126215 | 0.03343189  | 0.034694296 | 0.03855656  | 0.032377444 |
| ENSG00000173706 | 0.036720573 | 0.040438279 | 0.040558044 | 0.037202547 |
| ENSG00000163508 | 0.076031701 | 0.05596503  | 0.05903556  | 0.084795157 |
| ENSG00000054803 | 0.023823097 | 0.028821894 | 0.031759526 | 0.018985688 |
| ENSG00000128591 | 0.038463582 | 0.037672476 | 0.03195181  | 0.032206441 |
| ENSG00000115233 | 0.025517709 | 0.029236197 | 0.02598387  | 0.028289249 |
| ENSG00000137822 | 0.033739311 | 0.0334256   | 0.032377053 | 0.03428113  |
| ENSG00000135083 | 0.017898356 | 0.024867535 | 0.024683545 | 0.016652421 |
| ENSG00000128581 | 0.015635153 | 0.026042935 | 0.024622274 | 0.015563886 |
| ENSG00000198242 | 0.014876102 | 0.02426315  | 0.024485891 | 0.015104098 |
| ENSG00000188707 | 0.051144797 | 0.061677916 | 0.053926903 | 0.053331213 |
| ENSG00000177363 | 0.01497262  | 0.024932848 | 0.024400704 | 0.014809986 |
| ENSG00000121741 | 0.025814585 | 0.032386078 | 0.033339435 | 0.026440445 |

|                 |             |             |             |             |
|-----------------|-------------|-------------|-------------|-------------|
| ENSG00000137413 | 0.017776741 | 0.027561373 | 0.028196189 | 0.018362758 |
| ENSG00000100292 | 0.123476636 | 0.095462746 | 0.118968169 | 0.103715483 |
| ENSG00000198742 | 0.01637695  | 0.024626703 | 0.026407855 | 0.014196592 |
| ENSG00000152952 | 0.171427341 | 0.085959456 | 0.06059866  | 0.070965702 |
| ENSG00000100342 | 0.019454004 | 0.029673669 | 0.027206051 | 0.017268768 |
| ENSG00000113905 | 0.016227032 | 0.02541689  | 0.024146579 | 0.015265455 |
| ENSG00000120211 | 0.015138527 | 0.024485172 | 0.024460329 | 0.014862565 |
| ENSG00000157510 | 0.015966898 | 0.025742458 | 0.024851566 | 0.016956008 |
| ENSG00000115850 | 0.032449005 | 0.052038055 | 0.03356133  | 0.029013571 |
| ENSG00000197457 | 0.052798201 | 0.05439503  | 0.059764417 | 0.072166493 |
| ENSG00000169744 | 0.023736487 | 0.027764014 | 0.025765043 | 0.017710119 |
| ENSG00000205336 | 0.066364311 | 0.065604471 | 0.065485519 | 0.080907073 |
| ENSG00000105664 | 0.020600753 | 0.030249311 | 0.028751747 | 0.019780322 |
| ENSG00000164287 | 0.016970439 | 0.025400942 | 0.024705755 | 0.015979694 |
| ENSG00000114374 | 0.108501133 | 0.120339256 | 0.101955712 | 0.100759967 |
| ENSG00000130733 | 0.035260448 | 0.034192365 | 0.041741137 | 0.033349381 |
| ENSG00000129354 | 0.01639184  | 0.025188572 | 0.025476382 | 0.015308732 |
| ENSG00000137807 | 0.039005373 | 0.037967662 | 0.030664442 | 0.033354246 |
| ENSG00000144278 | 0.015150097 | 0.024369866 | 0.024986631 | 0.015441577 |
| ENSG00000084234 | 0.052444146 | 0.062982014 | 0.03951551  | 0.042519503 |
| ENSG00000102755 | 0.04612947  | 0.051553709 | 0.045058553 | 0.031722787 |
| ENSG00000167747 | 0.0334566   | 0.03324617  | 0.036175194 | 0.037045366 |
| ENSG00000133835 | 0.034151148 | 0.036663484 | 0.030159955 | 0.0259613   |
| ENSG00000083817 | 0.0278553   | 0.047800473 | 0.049757169 | 0.027843554 |
| ENSG00000117877 | 0.045595198 | 0.041659675 | 0.04001103  | 0.046847254 |
| ENSG00000164548 | 0.024776838 | 0.030319525 | 0.029001165 | 0.021835496 |
| ENSG00000197111 | 0.017243313 | 0.025815658 | 0.027348445 | 0.017157815 |
| ENSG00000174469 | 0.030620905 | 0.026709356 | 0.025900041 | 0.018257969 |
| ENSG00000134049 | 0.027167139 | 0.030051548 | 0.033925727 | 0.031125754 |
| ENSG00000107263 | 0.018402376 | 0.0253395   | 0.025830898 | 0.016927203 |
| ENSG00000136960 | 0.098910255 | 0.084727662 | 0.07326167  | 0.086531504 |
| ENSG00000103423 | 0.027293325 | 0.033052111 | 0.030310101 | 0.021766059 |
| ENSG00000123159 | 0.05286504  | 0.048561703 | 0.041493797 | 0.046539136 |
| ENSG00000169306 | 0.015871531 | 0.024613691 | 0.024438448 | 0.015698358 |
| ENSG00000179846 | 0.015897253 | 0.027683509 | 0.025850975 | 0.015226875 |
| ENSG00000135093 | 0.029053324 | 0.033880555 | 0.035569377 | 0.023935877 |
| ENSG00000091010 | 0.017680963 | 0.026353012 | 0.026292412 | 0.016837565 |
| ENSG00000174498 | 0.017512395 | 0.025962372 | 0.025201023 | 0.015074329 |
| ENSG00000006453 | 0.105841246 | 0.079082838 | 0.090430653 | 0.102293366 |
| ENSG00000204301 | 0.026950024 | 0.037004128 | 0.035163311 | 0.027209663 |
| ENSG00000136888 | 0.020771761 | 0.030264682 | 0.03039102  | 0.022774994 |
| ENSG00000006432 | 0.034238146 | 0.033817397 | 0.031212125 | 0.044659205 |
| ENSG00000117318 | 0.071591964 | 0.056844751 | 0.048642681 | 0.06060457  |
| ENSG00000158158 | 0.035954295 | 0.033960847 | 0.034603183 | 0.031352077 |
| ENSG00000167113 | 0.033476257 | 0.033113763 | 0.030462947 | 0.028190377 |
| ENSG00000188404 | 0.090980729 | 0.079134976 | 0.077009272 | 0.091717571 |
| ENSG00000095713 | 0.015357996 | 0.025644922 | 0.02445838  | 0.015535083 |
| ENSG00000183753 | 0.01520479  | 0.025309344 | 0.024910394 | 0.014499365 |
| ENSG00000160588 | 0.021051378 | 0.026553583 | 0.028593328 | 0.020602917 |
| ENSG00000069275 | 0.024148136 | 0.028206438 | 0.029076718 | 0.01913807  |
| ENSG00000121388 | 0.032771789 | 0.036299758 | 0.0327278   | 0.03500293  |
| ENSG00000159423 | 0.038730988 | 0.043273557 | 0.035572679 | 0.045374661 |
| ENSG00000058085 | 0.018489214 | 0.026312224 | 0.025080466 | 0.015259377 |
| ENSG00000132746 | 0.019610639 | 0.026860887 | 0.027634501 | 0.021893374 |

|                 |             |             |             |             |
|-----------------|-------------|-------------|-------------|-------------|
| ENSG00000187151 | 0.017057185 | 0.024676765 | 0.025102719 | 0.0161944   |
| ENSG00000186897 | 0.01506841  | 0.02548483  | 0.024901387 | 0.014873349 |
| ENSG00000116199 | 0.029836824 | 0.033535912 | 0.033530469 | 0.023987919 |
| ENSG00000170689 | 0.036126725 | 0.037989095 | 0.032176963 | 0.047095039 |
| ENSG00000165995 | 0.015370925 | 0.025389311 | 0.024674323 | 0.015776062 |
| ENSG00000183773 | 0.016454557 | 0.026652607 | 0.024554094 | 0.014510772 |
| ENSG00000165816 | 0.015625877 | 0.025473308 | 0.024262778 | 0.014814999 |
| ENSG00000123094 | 0.016081796 | 0.025218234 | 0.025415862 | 0.016961447 |
| ENSG00000127129 | 0.021178148 | 0.027519098 | 0.02571883  | 0.016576627 |
| ENSG00000114013 | 0.075252089 | 0.056368342 | 0.065210044 | 0.073770683 |
| ENSG00000123297 | 0.028521187 | 0.030296712 | 0.034629011 | 0.026999743 |
| ENSG00000078401 | 0.094243706 | 0.074125259 | 0.072682951 | 0.07652464  |
| ENSG00000105404 | 0.039013393 | 0.037171146 | 0.042515366 | 0.043730113 |
| ENSG00000077585 | 0.040043159 | 0.040984953 | 0.041498494 | 0.039718859 |
| ENSG00000042317 | 0.047471649 | 0.043545783 | 0.040909063 | 0.048030377 |
| ENSG00000066382 | 0.019039792 | 0.026727421 | 0.026028753 | 0.019263582 |
| ENSG00000106615 | 0.025440908 | 0.035624513 | 0.033600805 | 0.023967803 |
| ENSG00000178055 | 0.021809596 | 0.028698774 | 0.026604439 | 0.021278545 |
| ENSG00000103091 | 0.021957917 | 0.028359491 | 0.030497269 | 0.024607122 |
| ENSG00000007516 | 0.020467382 | 0.030540657 | 0.029058263 | 0.024996896 |
| ENSG00000178015 | 0.017680907 | 0.02444924  | 0.025194259 | 0.016058621 |
| ENSG00000108387 | 0.014622308 | 0.025498956 | 0.025044718 | 0.015279636 |
| ENSG00000180771 | 0.029425967 | 0.037808781 | 0.042998238 | 0.026253983 |
| ENSG00000115415 | 0.026797746 | 0.030833205 | 0.028484062 | 0.020545219 |
| ENSG00000110911 | 0.040357953 | 0.048818973 | 0.042796314 | 0.035138477 |
| ENSG00000108556 | 0.024699515 | 0.026610447 | 0.028025731 | 0.019878297 |
| ENSG00000163349 | 0.018469904 | 0.026955509 | 0.025949414 | 0.018562507 |
| ENSG00000181481 | 0.039594448 | 0.034324035 | 0.03356477  | 0.045016869 |
| ENSG00000120533 | 0.021528021 | 0.026681915 | 0.027649572 | 0.018426788 |
| ENSG00000124942 | 0.023302908 | 0.029374293 | 0.026482204 | 0.021906294 |
| ENSG00000184343 | 0.019609311 | 0.027373857 | 0.027119232 | 0.017064586 |
| ENSG00000241595 | 0.017117572 | 0.025016442 | 0.025728283 | 0.014769085 |
| ENSG00000125354 | 0.033969723 | 0.039089833 | 0.035528598 | 0.035652707 |
| ENSG00000175189 | 0.016778954 | 0.025773332 | 0.024649211 | 0.015670172 |
| ENSG00000117016 | 0.079890611 | 0.062243477 | 0.060171209 | 0.073264816 |
| ENSG00000116031 | 0.015398663 | 0.025846578 | 0.025452931 | 0.015603264 |
| ENSG00000196890 | 0.029741795 | 0.030532942 | 0.033718355 | 0.0239889   |
| ENSG00000110484 | 0.015119829 | 0.024912442 | 0.024116665 | 0.014836928 |
| ENSG00000152137 | 0.01706546  | 0.026777513 | 0.025772436 | 0.015754768 |
| ENSG00000142444 | 0.022173129 | 0.027861116 | 0.032479217 | 0.01905533  |
| ENSG00000108849 | 0.021167986 | 0.025897045 | 0.02542825  | 0.020465717 |
| ENSG00000181784 | 0.016179618 | 0.024440629 | 0.024827892 | 0.015565456 |
| ENSG00000198373 | 0.015463786 | 0.024598152 | 0.024197773 | 0.01484033  |
| ENSG00000197299 | 0.049747903 | 0.040987921 | 0.039633987 | 0.033020764 |
| ENSG00000137145 | 0.031275065 | 0.031272654 | 0.033398869 | 0.029433459 |
| ENSG00000102978 | 0.027926726 | 0.032727826 | 0.03862718  | 0.027745838 |
| ENSG00000137203 | 0.017568727 | 0.026060974 | 0.024552395 | 0.015941285 |
| ENSG00000138293 | 0.020571944 | 0.028675242 | 0.027666823 | 0.019349494 |
| ENSG00000092439 | 0.038852902 | 0.042719701 | 0.037012574 | 0.027559938 |
| ENSG00000187144 | 0.015679558 | 0.024734473 | 0.024752362 | 0.015944669 |
| ENSG00000127220 | 0.026417877 | 0.032890544 | 0.036660469 | 0.030264643 |
| ENSG00000072609 | 0.024174844 | 0.033396417 | 0.033988625 | 0.027267063 |
| ENSG00000010322 | 0.025460386 | 0.028395769 | 0.034031567 | 0.023499016 |
| ENSG00000150471 | 0.015841543 | 0.024817228 | 0.02441786  | 0.014353516 |

|                 |             |             |             |              |
|-----------------|-------------|-------------|-------------|--------------|
| ENSG00000154783 | 0.036517823 | 0.025708871 | 0.026108508 | 0.016480364  |
| ENSG00000160194 | 0.034187388 | 0.035215396 | 0.043893773 | 0.019725058  |
| ENSG00000167315 | 0.030874631 | 0.031806579 | 0.031047004 | 0.021891187  |
| ENSG00000087460 | 0.014685449 | 0.024414306 | 0.025073518 | 0.014391344  |
| ENSG00000086065 | 0.025141869 | 0.031311687 | 0.029200441 | 0.021036732  |
| ENSG00000122741 | 0.027383535 | 0.034817246 | 0.033165662 | 0.021990238  |
| ENSG00000176105 | 0.050081444 | 0.051229792 | 0.048371645 | 0.045447074  |
| ENSG00000158195 | 0.027219792 | 0.026824268 | 0.029915226 | 0.031744519  |
| ENSG00000116514 | 0.036496906 | 0.039196379 | 0.045897597 | 0.042150663  |
| ENSG00000169641 | 0.01977561  | 0.025181263 | 0.026079985 | 0.01834222   |
| ENSG00000173928 | 0.038013378 | 0.035124691 | 0.035571564 | 0.036322641  |
| ENSG00000164024 | 0.034254381 | 0.036227618 | 0.030920271 | 0.027904233  |
| ENSG00000165675 | 0.020808112 | 0.026639662 | 0.025957164 | 0.017708445  |
| ENSG00000198685 | 0.015979791 | 0.024746547 | 0.024541275 | 0.014480827  |
| ENSG00000185236 | 0.021908946 | 0.031751181 | 0.027687905 | 0.025630687  |
| ENSG00000077264 | 0.017005318 | 0.027468612 | 0.025115554 | 0.017980823  |
| ENSG00000180530 | 0.098515835 | 0.067723407 | 0.064897615 | 0.065880484  |
| ENSG00000138079 | 0.016627925 | 0.0251388   | 0.025557103 | 0.017087661  |
| ENSG00000143183 | 0.026773684 | 0.03200429  | 0.032952665 | 0.023354986  |
| ENSG00000110786 | 0.018359001 | 0.026966711 | 0.028192678 | 0.0171118174 |
| ENSG00000088726 | 0.016521256 | 0.025402512 | 0.024392483 | 0.014773323  |
| ENSG00000197694 | 0.027534483 | 0.038381396 | 0.036596322 | 0.03229993   |
| ENSG00000171984 | 0.035928803 | 0.042891977 | 0.034286593 | 0.034845392  |
| ENSG00000101890 | 0.015870645 | 0.025283538 | 0.024478201 | 0.015568143  |
| ENSG00000162415 | 0.028397809 | 0.027235127 | 0.025334595 | 0.017468433  |
| ENSG00000145824 | 0.135541979 | 0.060336782 | 0.059325172 | 0.074128693  |
| ENSG00000185728 | 0.038673911 | 0.045063255 | 0.054442079 | 0.038767352  |
| ENSG00000213088 | 0.048661531 | 0.036295243 | 0.026721825 | 0.025634517  |
| ENSG00000203710 | 0.014731834 | 0.025151933 | 0.024425782 | 0.014539442  |
| ENSG00000129521 | 0.114762849 | 0.081030593 | 0.073638944 | 0.087016615  |
| ENSG0000006007  | 0.02441601  | 0.03263725  | 0.032719136 | 0.024034285  |
| ENSG00000197256 | 0.054801474 | 0.045695738 | 0.040320206 | 0.042094135  |
| ENSG00000151715 | 0.016063606 | 0.026192502 | 0.024508663 | 0.016244217  |
| ENSG00000156787 | 0.0412491   | 0.041635574 | 0.034456536 | 0.028264412  |
| ENSG00000243566 | 0.016644695 | 0.025307485 | 0.024814534 | 0.018161517  |
| ENSG00000168542 | 0.017599381 | 0.026263247 | 0.02675309  | 0.017121797  |
| ENSG00000008517 | 0.091417562 | 0.055594832 | 0.055417488 | 0.067621627  |
| ENSG00000197479 | 0.019346598 | 0.026409374 | 0.029169986 | 0.017865618  |
| ENSG00000184277 | 0.04207822  | 0.037143949 | 0.037116223 | 0.040268559  |
| ENSG00000072042 | 0.024219863 | 0.028704129 | 0.026188924 | 0.018791948  |
| ENSG00000113492 | 0.017134849 | 0.025983836 | 0.024898207 | 0.016183664  |
| ENSG00000168267 | 0.019912015 | 0.029151174 | 0.027241984 | 0.019008152  |
| ENSG00000142910 | 0.019271111 | 0.026145986 | 0.025501822 | 0.019457815  |
| ENSG00000124157 | 0.019352583 | 0.024901687 | 0.025333288 | 0.016095058  |
| ENSG00000069206 | 0.015263419 | 0.024904879 | 0.025181856 | 0.014780763  |
| ENSG00000151690 | 0.029807163 | 0.032475361 | 0.031377953 | 0.029205346  |
| ENSG00000111412 | 0.035491852 | 0.040765268 | 0.040086922 | 0.034267469  |
| ENSG00000139722 | 0.066014604 | 0.054256442 | 0.056871654 | 0.047172531  |
| ENSG00000008394 | 0.114292931 | 0.074925543 | 0.066920717 | 0.094474625  |
| ENSG00000184574 | 0.036173796 | 0.034154527 | 0.036864309 | 0.036962982  |
| ENSG00000163655 | 0.027431477 | 0.032733534 | 0.029358847 | 0.024693066  |
| ENSG00000188620 | 0.129710955 | 0.105811608 | 0.100302255 | 0.119242712  |
| ENSG00000163539 | 0.03775639  | 0.053822772 | 0.036557952 | 0.043419429  |
| ENSG00000159723 | 0.020913375 | 0.028386699 | 0.025859319 | 0.017139473  |

|                 |             |             |             |             |
|-----------------|-------------|-------------|-------------|-------------|
| ENSG00000253729 | 0.038934573 | 0.050330839 | 0.036372089 | 0.033777014 |
| ENSG00000135249 | 0.015404759 | 0.025137111 | 0.024794602 | 0.01496746  |
| ENSG00000203836 | 0.021113437 | 0.029109092 | 0.027122589 | 0.020559014 |
| ENSG00000175393 | 0.016009336 | 0.024148842 | 0.024665699 | 0.015435412 |
| ENSG00000108352 | 0.036608811 | 0.029894434 | 0.028736273 | 0.041061179 |
| ENSG00000188290 | 0.115973436 | 0.077773466 | 0.071580143 | 0.10544063  |
| ENSG00000101782 | 0.025344242 | 0.030240125 | 0.030191852 | 0.025890844 |
| ENSG00000169714 | 0.024093473 | 0.031815073 | 0.029545655 | 0.021718739 |
| ENSG00000103942 | 0.041692656 | 0.034866168 | 0.036468831 | 0.029624973 |
| ENSG00000185024 | 0.015606127 | 0.025413219 | 0.024725108 | 0.0145261   |
| ENSG00000146678 | 0.016336137 | 0.024335191 | 0.025361487 | 0.015687288 |
| ENSG00000171657 | 0.03275816  | 0.029795432 | 0.028490202 | 0.024712401 |
| ENSG00000111961 | 0.057612011 | 0.045261072 | 0.040700163 | 0.048920606 |
| ENSG00000145284 | 0.016361921 | 0.026718856 | 0.026118002 | 0.015956636 |
| ENSG00000005981 | 0.015574868 | 0.024958775 | 0.024448559 | 0.015376914 |
| ENSG00000226761 | 0.015744176 | 0.025179365 | 0.024656166 | 0.014929587 |
| ENSG00000077616 | 0.030298467 | 0.038187128 | 0.032852111 | 0.046178235 |
| ENSG00000156925 | 0.018024698 | 0.026442974 | 0.025183867 | 0.016860829 |
| ENSG00000188342 | 0.029433255 | 0.031321235 | 0.028639844 | 0.02318612  |
| ENSG00000178795 | 0.014941204 | 0.024367629 | 0.025784755 | 0.01555327  |
| ENSG00000126561 | 0.040111681 | 0.036413019 | 0.037221631 | 0.033678442 |
| ENSG00000075914 | 0.030489335 | 0.02815929  | 0.030875121 | 0.02631761  |
| ENSG00000102195 | 0.016441006 | 0.024568965 | 0.025168299 | 0.015274445 |
| ENSG00000178188 | 0.023006243 | 0.027818501 | 0.035250149 | 0.023193745 |
| ENSG00000124575 | 0.060597265 | 0.039742459 | 0.049275026 | 0.063074762 |
| ENSG00000165076 | 0.017960649 | 0.025532023 | 0.026526567 | 0.015307226 |
| ENSG00000000003 | 0.022314088 | 0.025220688 | 0.024583592 | 0.021506493 |
| ENSG00000171867 | 0.059992152 | 0.048975528 | 0.042674756 | 0.045163014 |
| ENSG00000213265 | 0.015711222 | 0.025186953 | 0.024446041 | 0.015078584 |
| ENSG00000077044 | 0.022439142 | 0.027328637 | 0.029541402 | 0.021831421 |
| ENSG00000065600 | 0.016243785 | 0.024316143 | 0.024451634 | 0.016070626 |
| ENSG00000196305 | 0.023137686 | 0.02888723  | 0.026409957 | 0.020704776 |
| ENSG00000232112 | 0.023944021 | 0.027469604 | 0.030426193 | 0.020519052 |
| ENSG00000096384 | 0.020235967 | 0.025549199 | 0.025337671 | 0.01989584  |
| ENSG00000092009 | 0.072543563 | 0.046407399 | 0.04303195  | 0.043675238 |
| ENSG00000160145 | 0.015330769 | 0.025515895 | 0.024385981 | 0.014755945 |
| ENSG00000178409 | 0.014657847 | 0.024037982 | 0.025215462 | 0.013884533 |
| ENSG00000140416 | 0.019642145 | 0.025180744 | 0.026923551 | 0.016371097 |
| ENSG00000075303 | 0.016586349 | 0.025923654 | 0.025352177 | 0.016031901 |
| ENSG00000105894 | 0.019711377 | 0.024867422 | 0.024787525 | 0.01712741  |
| ENSG00000138085 | 0.020838418 | 0.027228416 | 0.027874755 | 0.020059893 |
| ENSG00000157077 | 0.01963688  | 0.026281154 | 0.026634298 | 0.018606523 |
| ENSG00000105699 | 0.014853555 | 0.025097541 | 0.025706164 | 0.015159687 |
| ENSG00000119953 | 0.027015706 | 0.032099872 | 0.030122026 | 0.025281209 |
| ENSG00000215695 | 0.026624417 | 0.036088041 | 0.041720645 | 0.026880249 |
| ENSG00000139835 | 0.016525088 | 0.026649422 | 0.024628361 | 0.016237936 |
| ENSG00000179600 | 0.016318586 | 0.027361352 | 0.025265293 | 0.016093677 |
| ENSG00000166930 | 0.015646399 | 0.025862023 | 0.025071124 | 0.01502431  |
| ENSG00000198010 | 0.015507073 | 0.025007561 | 0.026276765 | 0.015759733 |
| ENSG00000100600 | 0.05248797  | 0.042926182 | 0.037467824 | 0.043363565 |
| ENSG00000116667 | 0.023670441 | 0.027205837 | 0.025674312 | 0.021995052 |
| ENSG00000109323 | 0.041977012 | 0.043516979 | 0.043148108 | 0.041447967 |
| ENSG00000149179 | 0.030255709 | 0.037035003 | 0.031827434 | 0.026434737 |
| ENSG00000137270 | 0.016259632 | 0.027273884 | 0.025688824 | 0.016175394 |

|                 |             |             |             |             |
|-----------------|-------------|-------------|-------------|-------------|
| ENSG00000170819 | 0.077223753 | 0.071452333 | 0.05868572  | 0.066593364 |
| ENSG00000170802 | 0.019418299 | 0.026764139 | 0.027290963 | 0.020692055 |
| ENSG00000164325 | 0.014894757 | 0.025010109 | 0.025300185 | 0.014528602 |
| ENSG00000170323 | 0.021052088 | 0.026334924 | 0.028443889 | 0.019064672 |
| ENSG00000171484 | 0.017247219 | 0.027301022 | 0.027968883 | 0.01644353  |
| ENSG00000168703 | 0.017395682 | 0.026125553 | 0.026038757 | 0.017596895 |
| ENSG00000171773 | 0.015400258 | 0.024781974 | 0.025334602 | 0.014216034 |
| ENSG00000187105 | 0.024206632 | 0.024153697 | 0.025424032 | 0.021091476 |
| ENSG00000157131 | 0.017449454 | 0.025798774 | 0.028797417 | 0.018065791 |
| ENSG00000185250 | 0.016341118 | 0.02480572  | 0.024846131 | 0.016501317 |
| ENSG00000205496 | 0.018539511 | 0.025906168 | 0.02666403  | 0.018069197 |
| ENSG00000143390 | 0.019380531 | 0.029137812 | 0.029267778 | 0.022099756 |
| ENSG00000182968 | 0.015575538 | 0.024963572 | 0.025105914 | 0.015114134 |
| ENSG00000129170 | 0.015367887 | 0.025378135 | 0.024921446 | 0.014758365 |
| ENSG00000178695 | 0.057765587 | 0.043295406 | 0.042966344 | 0.043164491 |
| ENSG00000010810 | 0.154965042 | 0.090414646 | 0.09866739  | 0.136573513 |
| ENSG00000042062 | 0.01859666  | 0.02719396  | 0.026345238 | 0.016925684 |
| ENSG00000109066 | 0.021971574 | 0.028511645 | 0.026574061 | 0.018202042 |
| ENSG00000169019 | 0.030100208 | 0.037407653 | 0.03143788  | 0.032227274 |
| ENSG00000198271 | 0.015689505 | 0.024669331 | 0.025462072 | 0.015151771 |
| ENSG00000100906 | 0.028743398 | 0.031970629 | 0.029083422 | 0.025550197 |
| ENSG00000186188 | 0.015746122 | 0.024600163 | 0.02438532  | 0.015103786 |
| ENSG00000166024 | 0.031641304 | 0.033919038 | 0.033464288 | 0.024925824 |
| ENSG00000153885 | 0.016489574 | 0.025247715 | 0.024488315 | 0.014829872 |
| ENSG00000143344 | 0.044308753 | 0.047397807 | 0.041271924 | 0.058972159 |
| ENSG00000168795 | 0.023804789 | 0.034722062 | 0.031420647 | 0.023381156 |
| ENSG00000141522 | 0.026050363 | 0.030956074 | 0.035642909 | 0.027617138 |
| ENSG00000092200 | 0.015452846 | 0.025085618 | 0.024395329 | 0.015335859 |
| ENSG00000164458 | 0.065112696 | 0.055278441 | 0.035622777 | 0.0509268   |
| ENSG00000124126 | 0.027029862 | 0.031647949 | 0.036584501 | 0.034489067 |
| ENSG00000111676 | 0.022447273 | 0.031572149 | 0.039622454 | 0.03010309  |
| ENSG00000174914 | 0.013187615 | 0.02393331  | 0.024213887 | 0.013443484 |
| ENSG00000134882 | 0.044904069 | 0.045067634 | 0.043428668 | 0.041120676 |
| ENSG00000147912 | 0.033346904 | 0.031400215 | 0.031803765 | 0.027697371 |
| ENSG00000166747 | 0.028855235 | 0.033878674 | 0.036329917 | 0.02652654  |
| ENSG00000198558 | 0.04088249  | 0.036748894 | 0.04070753  | 0.042968844 |
| ENSG00000132485 | 0.029478537 | 0.028927459 | 0.02764296  | 0.018527891 |
| ENSG00000213240 | 0.069479627 | 0.061004781 | 0.06692451  | 0.07303826  |
| ENSG00000240303 | 0.045721877 | 0.052523575 | 0.039194686 | 0.04839082  |
| ENSG00000174667 | 0.016246914 | 0.026571168 | 0.024820327 | 0.017240649 |
| ENSG00000020426 | 0.030799159 | 0.037310791 | 0.031681882 | 0.023325227 |
| ENSG00000178028 | 0.027342456 | 0.031450243 | 0.031818549 | 0.024664772 |
| ENSG00000138771 | 0.121288674 | 0.103146067 | 0.12475618  | 0.104033045 |
| ENSG00000135547 | 0.021877041 | 0.027152681 | 0.025460371 | 0.021625786 |
| ENSG00000205339 | 0.042293863 | 0.04746428  | 0.039445455 | 0.043138704 |
| ENSG00000127554 | 0.015146685 | 0.025618441 | 0.025453901 | 0.016274256 |
| ENSG00000197535 | 0.036131181 | 0.040263837 | 0.036811266 | 0.033870828 |
| ENSG00000115607 | 0.078109827 | 0.083696835 | 0.051141937 | 0.059122538 |
| ENSG00000144668 | 0.023205555 | 0.025578049 | 0.024991319 | 0.015452464 |
| ENSG00000164631 | 0.029570861 | 0.035599375 | 0.032641056 | 0.029169311 |
| ENSG00000079134 | 0.030740392 | 0.033267926 | 0.03182181  | 0.021917543 |
| ENSG00000173548 | 0.021035321 | 0.029244098 | 0.027632764 | 0.01924319  |
| ENSG00000138430 | 0.023978447 | 0.027309088 | 0.026116968 | 0.019278988 |
| ENSG00000144369 | 0.018483742 | 0.024402419 | 0.024339912 | 0.01673213  |

|                 |             |             |             |             |
|-----------------|-------------|-------------|-------------|-------------|
| ENSG00000130720 | 0.016435172 | 0.025349565 | 0.025578975 | 0.017702789 |
| ENSG00000089157 | 0.019608273 | 0.027617931 | 0.02842399  | 0.020992082 |
| ENSG00000107611 | 0.016816629 | 0.024947116 | 0.024375603 | 0.015418016 |
| ENSG00000173757 | 0.033411746 | 0.040125957 | 0.041285316 | 0.031558685 |
| ENSG00000181019 | 0.069711051 | 0.04829446  | 0.047927867 | 0.06131601  |
| ENSG00000132471 | 0.027741398 | 0.035741151 | 0.037056224 | 0.036443009 |
| ENSG00000070540 | 0.034620822 | 0.035179324 | 0.038653774 | 0.03539413  |
| ENSG00000119242 | 0.040940265 | 0.041110307 | 0.035508379 | 0.036304512 |
| ENSG00000198561 | 0.063450681 | 0.057854216 | 0.037266677 | 0.060825592 |
| ENSG00000117691 | 0.030704934 | 0.033970538 | 0.032110105 | 0.023655777 |
| ENSG00000131233 | 0.018230735 | 0.025695254 | 0.026251796 | 0.018580836 |
| ENSG00000117322 | 0.0851468   | 0.0861642   | 0.079809082 | 0.087754026 |
| ENSG00000101665 | 0.042553973 | 0.0477045   | 0.047562507 | 0.039878788 |
| ENSG00000122545 | 0.026283577 | 0.029093294 | 0.028887509 | 0.032163544 |
| ENSG00000179348 | 0.016566494 | 0.024272409 | 0.025498195 | 0.016368926 |
| ENSG00000110696 | 0.019706808 | 0.028607707 | 0.027167985 | 0.018265995 |
| ENSG00000006074 | 0.01818914  | 0.026413236 | 0.025843555 | 0.019303077 |
| ENSG00000126012 | 0.040151571 | 0.041647866 | 0.050162298 | 0.040396224 |
| ENSG00000168092 | 0.026944496 | 0.030579858 | 0.034993522 | 0.026685223 |
| ENSG00000091651 | 0.042856307 | 0.040026985 | 0.034902678 | 0.033660777 |
| ENSG00000104960 | 0.026127338 | 0.03015922  | 0.031306897 | 0.026430763 |
| ENSG00000163098 | 0.016929682 | 0.025177045 | 0.024895829 | 0.014086996 |
| ENSG00000187955 | 0.015979028 | 0.024717831 | 0.025514543 | 0.015334613 |
| ENSG00000134294 | 0.026432532 | 0.032477103 | 0.035296934 | 0.027488298 |
| ENSG00000173040 | 0.033705797 | 0.034861276 | 0.028602859 | 0.026372838 |
| ENSG00000075089 | 0.032538175 | 0.035184023 | 0.03034521  | 0.027518714 |
| ENSG00000141574 | 0.016564311 | 0.024400477 | 0.026398319 | 0.017624072 |
| ENSG00000134830 | 0.018628403 | 0.028017997 | 0.025897115 | 0.017238399 |
| ENSG00000102466 | 0.018553565 | 0.027996976 | 0.027611642 | 0.019899996 |
| ENSG00000215301 | 0.035656238 | 0.045423388 | 0.051877611 | 0.03146208  |
| ENSG00000214114 | 0.042145159 | 0.045415875 | 0.034069147 | 0.030355861 |
| ENSG00000113522 | 0.017344814 | 0.024522978 | 0.024949105 | 0.01646261  |
| ENSG00000160781 | 0.031542223 | 0.036183047 | 0.030660149 | 0.024298865 |
| ENSG00000124557 | 0.07292317  | 0.058212421 | 0.043778255 | 0.043124158 |
| ENSG00000115520 | 0.029359736 | 0.044543012 | 0.048607416 | 0.033912717 |
| ENSG00000163285 | 0.017001774 | 0.025982724 | 0.025447615 | 0.015790805 |
| ENSG00000198604 | 0.02701728  | 0.035283741 | 0.032514896 | 0.028051321 |
| ENSG00000137814 | 0.032934683 | 0.033697516 | 0.032309101 | 0.041093251 |
| ENSG00000198915 | 0.031129786 | 0.042190104 | 0.040183637 | 0.029246382 |
| ENSG00000085382 | 0.020690884 | 0.026177472 | 0.029405825 | 0.02104012  |
| ENSG00000162729 | 0.023960699 | 0.030062009 | 0.030924755 | 0.025871735 |
| ENSG00000109758 | 0.017037142 | 0.025186706 | 0.025208954 | 0.015034656 |
| ENSG00000110583 | 0.031636472 | 0.032052118 | 0.032051045 | 0.027596557 |
| ENSG00000137745 | 0.015136904 | 0.025799712 | 0.02487667  | 0.01583112  |
| ENSG00000105649 | 0.069502933 | 0.074377049 | 0.066840815 | 0.071213371 |
| ENSG00000064763 | 0.095987491 | 0.065389966 | 0.063003655 | 0.07461855  |
| ENSG00000063046 | 0.023662785 | 0.030315009 | 0.030967993 | 0.028461952 |
| ENSG00000114988 | 0.034661329 | 0.040223171 | 0.037541239 | 0.026062819 |
| ENSG00000168779 | 0.015969491 | 0.025620957 | 0.025098139 | 0.016425053 |
| ENSG00000139567 | 0.015236884 | 0.025936404 | 0.02633747  | 0.015734015 |
| ENSG00000129250 | 0.029052057 | 0.033045798 | 0.033043876 | 0.030644797 |
| ENSG00000143870 | 0.037369814 | 0.036354126 | 0.034851866 | 0.036815196 |
| ENSG00000141027 | 0.019976418 | 0.029749959 | 0.030044051 | 0.018223061 |
| ENSG00000138496 | 0.048352574 | 0.041656786 | 0.04088179  | 0.039602932 |



|                 |             |             |             |             |
|-----------------|-------------|-------------|-------------|-------------|
| ENSG00000112530 | 0.015188307 | 0.025284282 | 0.024737998 | 0.015506652 |
| ENSG00000175600 | 0.018435564 | 0.025580589 | 0.024888773 | 0.018164257 |
| ENSG00000167962 | 0.015709814 | 0.026744329 | 0.024534676 | 0.015982017 |
| ENSG00000186930 | 0.015317706 | 0.025193665 | 0.025059248 | 0.014689141 |
| ENSG00000139679 | 0.148119443 | 0.103162724 | 0.099881538 | 0.101874122 |
| ENSG00000153391 | 0.022132096 | 0.030524187 | 0.029422577 | 0.026999697 |
| ENSG00000187416 | 0.017967883 | 0.025992403 | 0.025159712 | 0.017183101 |
| ENSG00000184486 | 0.015859779 | 0.025227333 | 0.025752003 | 0.015084018 |
| ENSG00000162927 | 0.025668691 | 0.031950009 | 0.031378583 | 0.020102905 |
| ENSG00000159217 | 0.014729561 | 0.024952147 | 0.024268775 | 0.015095685 |
| ENSG00000188234 | 0.027114888 | 0.030159683 | 0.030648365 | 0.025305136 |
| ENSG00000005249 | 0.0175771   | 0.024382216 | 0.024252418 | 0.016166659 |
| ENSG00000170608 | 0.060718056 | 0.081493375 | 0.053600234 | 0.066407884 |
| ENSG00000101307 | 0.02679495  | 0.03341033  | 0.02523724  | 0.017299021 |
| ENSG00000214530 | 0.038505699 | 0.03659964  | 0.034718311 | 0.04101496  |
| ENSG00000146701 | 0.019888674 | 0.025624587 | 0.026076729 | 0.016243764 |
| ENSG00000068028 | 0.032078683 | 0.044647696 | 0.043483802 | 0.037017096 |
| ENSG00000116299 | 0.087317174 | 0.069144436 | 0.053232107 | 0.098555238 |
| ENSG00000104313 | 0.018650375 | 0.026467069 | 0.025504993 | 0.016091752 |
| ENSG00000168878 | 0.018709903 | 0.026370063 | 0.026997471 | 0.020495938 |
| ENSG00000205250 | 0.026617742 | 0.03416864  | 0.038457183 | 0.027742008 |
| ENSG00000160688 | 0.029710411 | 0.032846564 | 0.034200708 | 0.029415654 |
| ENSG00000153975 | 0.028054186 | 0.03191822  | 0.031082864 | 0.02277132  |
| ENSG00000140694 | 0.033516036 | 0.037042199 | 0.037687294 | 0.029323031 |
| ENSG00000181555 | 0.034794006 | 0.039803553 | 0.035943952 | 0.030724759 |
| ENSG00000144815 | 0.036617406 | 0.03469911  | 0.037338008 | 0.034134886 |
| ENSG00000078070 | 0.034221515 | 0.034468108 | 0.032520501 | 0.027352125 |
| ENSG00000108506 | 0.024696415 | 0.032457358 | 0.029732593 | 0.025302485 |
| ENSG00000162396 | 0.027238506 | 0.031041598 | 0.027341687 | 0.019579126 |
| ENSG00000024422 | 0.016043762 | 0.025324998 | 0.024763763 | 0.014694671 |
| ENSG00000129968 | 0.025248437 | 0.031938502 | 0.033671959 | 0.027855504 |
| ENSG00000090530 | 0.167799476 | 0.105820363 | 0.102492116 | 0.122625253 |
| ENSG00000124243 | 0.0379245   | 0.036337748 | 0.036644224 | 0.033513793 |
| ENSG00000148291 | 0.027457529 | 0.029732907 | 0.030594936 | 0.023466568 |
| ENSG00000161509 | 0.016426922 | 0.02496315  | 0.02540625  | 0.016070022 |
| ENSG00000183092 | 0.035943457 | 0.036624101 | 0.033589656 | 0.023059143 |
| ENSG00000169583 | 0.018237699 | 0.025320298 | 0.025291945 | 0.015360713 |
| ENSG00000131471 | 0.022240785 | 0.026742668 | 0.027180208 | 0.017322535 |
| ENSG00000178531 | 0.049994285 | 0.038145871 | 0.034498255 | 0.044931951 |
| ENSG00000005102 | 0.016180673 | 0.025584765 | 0.026059648 | 0.016694042 |
| ENSG00000170325 | 0.032847222 | 0.046089945 | 0.03324678  | 0.032536566 |
| ENSG00000167302 | 0.029029597 | 0.031723004 | 0.034495706 | 0.030767068 |
| ENSG00000179213 | 0.016842812 | 0.025575508 | 0.025298573 | 0.015864169 |
| ENSG00000115274 | 0.023787039 | 0.028594061 | 0.03105952  | 0.023474021 |
| ENSG00000197892 | 0.03453865  | 0.037487105 | 0.041401454 | 0.026889125 |
| ENSG00000173464 | 0.015236762 | 0.024883943 | 0.024880081 | 0.015688095 |
| ENSG00000221852 | 0.020063909 | 0.026841319 | 0.025257525 | 0.017098804 |
| ENSG00000159314 | 0.059896468 | 0.060206353 | 0.050918801 | 0.056982104 |
| ENSG00000139112 | 0.07101167  | 0.062305726 | 0.047868878 | 0.056770241 |
| ENSG00000160838 | 0.017351566 | 0.024543488 | 0.02563552  | 0.015478434 |
| ENSG00000196544 | 0.029461101 | 0.036825965 | 0.033269898 | 0.03405993  |
| ENSG00000177374 | 0.042310869 | 0.059766194 | 0.043964978 | 0.061628956 |
| ENSG00000119318 | 0.029662044 | 0.032298604 | 0.029498006 | 0.023369179 |
| ENSG00000166348 | 0.028957612 | 0.037021669 | 0.032916298 | 0.03103939  |

|                |             |             |             |             |
|----------------|-------------|-------------|-------------|-------------|
| ENSG0000087274 | 0.022773555 | 0.03151517  | 0.034047416 | 0.020420787 |
| ENSG0000079691 | 0.090701075 | 0.084057731 | 0.079722542 | 0.069386619 |
| ENSG0000168710 | 0.015237767 | 0.024331381 | 0.024921381 | 0.014239127 |
| ENSG0000127920 | 0.113874617 | 0.089746633 | 0.087282281 | 0.087476105 |
| ENSG0000161040 | 0.019816894 | 0.02512015  | 0.02464816  | 0.015890012 |
| ENSG0000148337 | 0.017853281 | 0.026353264 | 0.028069861 | 0.017006418 |
| ENSG0000136270 | 0.025780319 | 0.030767329 | 0.029975045 | 0.023353834 |
| ENSG0000167088 | 0.039248032 | 0.038015246 | 0.033946599 | 0.038577931 |
| ENSG0000034677 | 0.028259143 | 0.033991938 | 0.034738565 | 0.03332925  |
| ENSG0000006744 | 0.028973426 | 0.03192495  | 0.03509274  | 0.031763426 |
| ENSG0000120549 | 0.023468805 | 0.036049556 | 0.028398032 | 0.024366966 |
| ENSG0000172586 | 0.024993493 | 0.030549689 | 0.028370587 | 0.022378441 |
| ENSG0000103485 | 0.041269794 | 0.033416503 | 0.036346939 | 0.042585892 |
| ENSG0000243729 | 0.016362166 | 0.025477378 | 0.025416409 | 0.015104409 |
| ENSG0000175387 | 0.023533004 | 0.03209564  | 0.030638577 | 0.02163163  |
| ENSG0000116678 | 0.021510139 | 0.0275369   | 0.027079475 | 0.026038796 |
| ENSG0000172482 | 0.016383756 | 0.025561338 | 0.024374196 | 0.015359893 |
| ENSG0000242372 | 0.016469727 | 0.024705187 | 0.025026599 | 0.015094321 |
| ENSG0000231738 | 0.015683904 | 0.025622883 | 0.024744659 | 0.01671965  |
| ENSG0000101405 | 0.016797327 | 0.025563544 | 0.027108071 | 0.017543443 |
| ENSG0000176087 | 0.026895089 | 0.031128881 | 0.034589478 | 0.028051565 |
| ENSG0000111245 | 0.03977527  | 0.038142277 | 0.034641021 | 0.034257861 |
| ENSG0000126549 | 0.015546407 | 0.024716438 | 0.023891905 | 0.014285632 |
| ENSG0000129083 | 0.019884262 | 0.02853526  | 0.029821578 | 0.019409701 |
| ENSG0000176302 | 0.016924444 | 0.025098555 | 0.027060556 | 0.016458713 |
| ENSG0000124784 | 0.018740183 | 0.027605071 | 0.025861618 | 0.02202342  |
| ENSG0000182674 | 0.016421196 | 0.024645288 | 0.024926702 | 0.014781005 |
| ENSG0000167914 | 0.015294838 | 0.024568779 | 0.025266156 | 0.015095382 |
| ENSG0000198721 | 0.015647865 | 0.025639695 | 0.024633214 | 0.017443654 |
| ENSG0000107957 | 0.022575526 | 0.028150323 | 0.025428895 | 0.01933188  |
| ENSG0000160345 | 0.035124552 | 0.032304081 | 0.032173407 | 0.030540138 |
| ENSG0000159958 | 0.045965152 | 0.036792696 | 0.040903229 | 0.043207003 |
| ENSG0000138399 | 0.033634218 | 0.034869532 | 0.028328011 | 0.023253032 |
| ENSG0000176171 | 0.058722955 | 0.039337783 | 0.035815359 | 0.03650427  |
| ENSG0000104976 | 0.022521494 | 0.026709154 | 0.031640209 | 0.02140628  |
| ENSG0000112276 | 0.016701132 | 0.025310882 | 0.025420976 | 0.015392304 |
| ENSG0000165388 | 0.014709051 | 0.024466349 | 0.024040045 | 0.014682732 |
| ENSG0000157916 | 0.030400551 | 0.036434934 | 0.031438446 | 0.024591858 |
| ENSG0000178031 | 0.016385826 | 0.024833979 | 0.024800999 | 0.014921694 |
| ENSG0000137078 | 0.090629892 | 0.058651396 | 0.052744064 | 0.046768182 |
| ENSG0000196747 | 0.029778729 | 0.02850569  | 0.034697352 | 0.030902315 |
| ENSG0000171148 | 0.040114136 | 0.037943875 | 0.037283762 | 0.045799511 |
| ENSG0000180878 | 0.021444943 | 0.025162269 | 0.027999679 | 0.019318255 |
| ENSG0000163191 | 0.060343941 | 0.047808885 | 0.040722923 | 0.056107529 |
| ENSG0000163739 | 0.0177185   | 0.02591185  | 0.026318177 | 0.017590504 |
| ENSG0000205581 | 0.024343087 | 0.029617758 | 0.027593326 | 0.022673289 |
| ENSG0000023902 | 0.03026795  | 0.035207687 | 0.036085707 | 0.040294497 |
| ENSG0000125817 | 0.032998099 | 0.03790674  | 0.04444718  | 0.038110195 |
| ENSG0000149054 | 0.05771079  | 0.057000329 | 0.047778144 | 0.064012243 |
| ENSG0000188175 | 0.016933078 | 0.026147084 | 0.02605417  | 0.015613598 |
| ENSG0000150556 | 0.089873303 | 0.081509635 | 0.053072579 | 0.089742788 |
| ENSG0000133597 | 0.039730109 | 0.040551073 | 0.034006862 | 0.030364869 |
| ENSG0000075702 | 0.053127192 | 0.043780794 | 0.040926733 | 0.044610259 |
| ENSG0000245680 | 0.030020068 | 0.035089777 | 0.030303958 | 0.022915839 |

|                 |             |             |             |             |
|-----------------|-------------|-------------|-------------|-------------|
| ENSG00000168505 | 0.015264063 | 0.024805752 | 0.025113332 | 0.014400717 |
| ENSG00000160886 | 0.01659117  | 0.025407975 | 0.026077856 | 0.014991351 |
| ENSG00000128011 | 0.018578513 | 0.026406365 | 0.02611377  | 0.02084368  |
| ENSG00000143514 | 0.061378764 | 0.053400829 | 0.048088413 | 0.048940106 |
| ENSG00000118407 | 0.073332311 | 0.036386189 | 0.02775382  | 0.034409958 |
| ENSG00000173875 | 0.036934541 | 0.038107519 | 0.046318059 | 0.031365614 |
| ENSG00000125657 | 0.03053323  | 0.032732921 | 0.034790453 | 0.034522445 |
| ENSG00000061794 | 0.026082042 | 0.030160014 | 0.030063897 | 0.025505631 |
| ENSG00000011485 | 0.027988083 | 0.031139963 | 0.030131958 | 0.02417742  |
| ENSG00000188223 | 0.025974873 | 0.033192928 | 0.035919815 | 0.025615936 |
| ENSG00000184304 | 0.026527653 | 0.03344728  | 0.028255895 | 0.028745951 |
| ENSG00000169684 | 0.031719427 | 0.031008205 | 0.031483651 | 0.03019788  |
| ENSG00000167986 | 0.023088519 | 0.031503974 | 0.028826371 | 0.020827446 |
| ENSG00000139155 | 0.015425755 | 0.024816784 | 0.02506     | 0.014141282 |
| ENSG00000163682 | 0.018319228 | 0.025738531 | 0.02420282  | 0.021846029 |
| ENSG00000165949 | 0.130171844 | 0.161957556 | 0.123774588 | 0.137818144 |
| ENSG00000148082 | 0.021011326 | 0.02487068  | 0.024156682 | 0.014477852 |
| ENSG00000172115 | 0.050488562 | 0.057327875 | 0.055648165 | 0.051156355 |
| ENSG00000198682 | 0.039829849 | 0.046080465 | 0.042129121 | 0.035381592 |
| ENSG00000167384 | 0.035822015 | 0.040138385 | 0.043270505 | 0.03701907  |
| ENSG00000021852 | 0.017827048 | 0.026272479 | 0.029240479 | 0.016346553 |
| ENSG00000105329 | 0.016758722 | 0.025555316 | 0.024999438 | 0.016969436 |
| ENSG00000145833 | 0.030800512 | 0.034373532 | 0.029736706 | 0.029666917 |
| ENSG00000229314 | 0.015272927 | 0.024529741 | 0.024720784 | 0.01489674  |
| ENSG00000186675 | 0.015682585 | 0.024195678 | 0.02441685  | 0.015154664 |
| ENSG00000081189 | 0.024003183 | 0.030201973 | 0.029744729 | 0.022443721 |
| ENSG00000163001 | 0.041996791 | 0.041345934 | 0.035835047 | 0.04195148  |
| ENSG00000103260 | 0.041874646 | 0.032503953 | 0.033954828 | 0.032430989 |
| ENSG00000111897 | 0.025888302 | 0.031098427 | 0.039526233 | 0.025402198 |
| ENSG00000182512 | 0.023591937 | 0.030165914 | 0.028693075 | 0.022542843 |
| ENSG00000144182 | 0.031516738 | 0.039921279 | 0.034006562 | 0.02254728  |
| ENSG00000054690 | 0.018694587 | 0.029068704 | 0.025398941 | 0.018904153 |
| ENSG00000197020 | 0.016565088 | 0.025607172 | 0.025211401 | 0.015269626 |
| ENSG00000163430 | 0.0170386   | 0.025258766 | 0.025345573 | 0.015739994 |
| ENSG00000138180 | 0.042324415 | 0.03898754  | 0.033590826 | 0.031574886 |
| ENSG00000102891 | 0.042361042 | 0.034384594 | 0.030086181 | 0.026232226 |
| ENSG00000154655 | 0.017056555 | 0.025294591 | 0.024264688 | 0.015295817 |
| ENSG00000160472 | 0.016797108 | 0.02567601  | 0.025903096 | 0.015541539 |
| ENSG00000197863 | 0.045726112 | 0.042008302 | 0.039313093 | 0.050588255 |
| ENSG00000163145 | 0.016352746 | 0.026025963 | 0.024993605 | 0.015840983 |
| ENSG00000213551 | 0.037961359 | 0.032806455 | 0.038441866 | 0.036799098 |
| ENSG00000250120 | 0.017560101 | 0.026108737 | 0.025779498 | 0.015950366 |
| ENSG00000180185 | 0.038756741 | 0.041550088 | 0.040923183 | 0.035074785 |
| ENSG00000134444 | 0.029872018 | 0.034685186 | 0.030594634 | 0.025445576 |
| ENSG00000131507 | 0.034563203 | 0.035594244 | 0.030267789 | 0.025519715 |
| ENSG00000148513 | 0.017861669 | 0.027315596 | 0.027310754 | 0.015780897 |
| ENSG00000104343 | 0.027444846 | 0.035056121 | 0.034477857 | 0.024448292 |
| ENSG00000166128 | 0.031135898 | 0.038395768 | 0.03934506  | 0.033155529 |
| ENSG00000137834 | 0.016071274 | 0.02534584  | 0.026468955 | 0.017908021 |
| ENSG00000148842 | 0.022869362 | 0.029388672 | 0.032891669 | 0.024724537 |
| ENSG00000165684 | 0.039062318 | 0.04011467  | 0.043235097 | 0.033088138 |
| ENSG00000179071 | 0.01743132  | 0.025038494 | 0.026134044 | 0.01685038  |
| ENSG00000164411 | 0.017904202 | 0.025249028 | 0.025798603 | 0.016611376 |
| ENSG00000163795 | 0.021690285 | 0.029012047 | 0.033725394 | 0.023618061 |

|                 |             |             |             |             |
|-----------------|-------------|-------------|-------------|-------------|
| ENSG00000105072 | 0.032854825 | 0.03611995  | 0.031777524 | 0.026573633 |
| ENSG00000062716 | 0.038532506 | 0.037200265 | 0.035003568 | 0.033267065 |
| ENSG00000197150 | 0.022858822 | 0.02919577  | 0.026553751 | 0.021998858 |
| ENSG00000081277 | 0.017894379 | 0.025486385 | 0.025809209 | 0.017731406 |
| ENSG00000139946 | 0.023779836 | 0.03048776  | 0.029679998 | 0.020705128 |
| ENSG00000135931 | 0.058176476 | 0.055999742 | 0.044213145 | 0.043531421 |
| ENSG00000100721 | 0.079651879 | 0.040893421 | 0.041042156 | 0.054698269 |
| ENSG00000126522 | 0.043587933 | 0.037781949 | 0.032113348 | 0.03456467  |
| ENSG00000158882 | 0.034332623 | 0.035110031 | 0.034425043 | 0.03573147  |
| ENSG00000180938 | 0.026095584 | 0.03168818  | 0.03081973  | 0.024856361 |
| ENSG00000181333 | 0.016306922 | 0.024952538 | 0.02498409  | 0.016022496 |
| ENSG00000104783 | 0.041567345 | 0.040950526 | 0.043119259 | 0.044729844 |
| ENSG00000115286 | 0.023523035 | 0.027049175 | 0.026855843 | 0.019940401 |
| ENSG00000163866 | 0.020936978 | 0.027493007 | 0.026381618 | 0.017079715 |
| ENSG00000146839 | 0.017765307 | 0.025565793 | 0.026037867 | 0.015107179 |
| ENSG00000139194 | 0.015354106 | 0.025193546 | 0.025697185 | 0.015875049 |
| ENSG00000171596 | 0.015628999 | 0.02452493  | 0.024087787 | 0.014749161 |
| ENSG00000143156 | 0.039188285 | 0.040962425 | 0.035154841 | 0.037477864 |
| ENSG00000170421 | 0.017511597 | 0.027221986 | 0.026044658 | 0.016197515 |
| ENSG00000187792 | 0.017806589 | 0.026423869 | 0.027091136 | 0.01735942  |
| ENSG00000234829 | 0.015946786 | 0.024604807 | 0.025758249 | 0.015321896 |
| ENSG00000120159 | 0.026353234 | 0.033093599 | 0.03022007  | 0.023968784 |
| ENSG00000130559 | 0.028753634 | 0.038739469 | 0.036253707 | 0.028865085 |
| ENSG00000139734 | 0.042204736 | 0.042509212 | 0.032439775 | 0.037868853 |
| ENSG00000114867 | 0.017944998 | 0.026787427 | 0.025833159 | 0.017626354 |
| ENSG00000171320 | 0.046823661 | 0.047772597 | 0.033860781 | 0.03698581  |
| ENSG00000169783 | 0.025581525 | 0.027630005 | 0.026489233 | 0.017814584 |
| ENSG00000111087 | 0.015176267 | 0.025324399 | 0.026137309 | 0.014981182 |
| ENSG00000156097 | 0.015417916 | 0.025748249 | 0.024471794 | 0.014525784 |
| ENSG00000141480 | 0.025549965 | 0.027001064 | 0.028144484 | 0.023948826 |
| ENSG00000172071 | 0.039058137 | 0.038241814 | 0.037076712 | 0.036598483 |
| ENSG00000107331 | 0.016387426 | 0.025292835 | 0.025169963 | 0.015408574 |
| ENSG00000127585 | 0.025743546 | 0.036493008 | 0.035474235 | 0.033135251 |
| ENSG00000177504 | 0.058738222 | 0.031431379 | 0.032982883 | 0.038956077 |
| ENSG00000075336 | 0.032117564 | 0.035748539 | 0.03060623  | 0.023859569 |
| ENSG00000111879 | 0.032330587 | 0.030873124 | 0.028824296 | 0.021418175 |
| ENSG00000103769 | 0.02980671  | 0.035861435 | 0.032992891 | 0.027170446 |
| ENSG00000128563 | 0.032000274 | 0.037193258 | 0.037946418 | 0.031983433 |
| ENSG00000120659 | 0.016604313 | 0.025192787 | 0.025656195 | 0.01650995  |
| ENSG00000118972 | 0.01882159  | 0.026903421 | 0.028135123 | 0.01718778  |
| ENSG00000163815 | 0.01782074  | 0.025683658 | 0.024672263 | 0.015553726 |
| ENSG00000116127 | 0.054265963 | 0.058290537 | 0.041817382 | 0.043441835 |
| ENSG00000063854 | 0.037036086 | 0.038228736 | 0.03763789  | 0.031619782 |
| ENSG00000075413 | 0.028956609 | 0.033998    | 0.030456424 | 0.023619508 |
| ENSG00000166317 | 0.104699223 | 0.100425861 | 0.076488395 | 0.099699012 |
| ENSG00000009790 | 0.03742763  | 0.041243189 | 0.040175272 | 0.037566534 |
| ENSG00000154305 | 0.01600775  | 0.02648681  | 0.025250287 | 0.014772014 |
| ENSG00000137218 | 0.035585078 | 0.041340953 | 0.031426266 | 0.027009023 |
| ENSG00000162755 | 0.028607867 | 0.029645902 | 0.029394522 | 0.026906293 |
| ENSG00000157637 | 0.019671862 | 0.026444152 | 0.0260544   | 0.017788701 |
| ENSG00000165182 | 0.014753432 | 0.024824378 | 0.024676087 | 0.01478037  |
| ENSG00000148153 | 0.024022426 | 0.027789928 | 0.027873108 | 0.02306824  |
| ENSG00000153574 | 0.033024946 | 0.035163016 | 0.032728875 | 0.033480672 |
| ENSG00000132963 | 0.019825875 | 0.027347176 | 0.028458472 | 0.02221775  |

|                 |             |             |             |             |
|-----------------|-------------|-------------|-------------|-------------|
| ENSG00000131910 | 0.016507861 | 0.025244725 | 0.025478308 | 0.016194324 |
| ENSG00000011198 | 0.045074408 | 0.039812903 | 0.03813485  | 0.038042558 |
| ENSG00000184470 | 0.017292655 | 0.025584825 | 0.024582202 | 0.016259438 |
| ENSG00000173156 | 0.036376466 | 0.032001324 | 0.029373721 | 0.025229208 |
| ENSG00000140015 | 0.017317549 | 0.02607388  | 0.025424923 | 0.014576413 |
| ENSG00000106144 | 0.038071944 | 0.038587011 | 0.036626897 | 0.032085396 |
| ENSG00000117222 | 0.02628305  | 0.030126572 | 0.029087336 | 0.021454276 |
| ENSG00000155313 | 0.033052865 | 0.037480602 | 0.029947083 | 0.027727062 |
| ENSG00000104044 | 0.028466601 | 0.024351567 | 0.026446554 | 0.014787989 |
| ENSG00000165029 | 0.0361244   | 0.053261336 | 0.037971948 | 0.054004174 |
| ENSG00000135914 | 0.073415913 | 0.054507899 | 0.051607209 | 0.042392471 |
| ENSG00000189052 | 0.01538951  | 0.02571182  | 0.026851742 | 0.01454325  |
| ENSG00000158552 | 0.032635602 | 0.033078511 | 0.034986166 | 0.02663239  |
| ENSG00000140157 | 0.024795834 | 0.03500173  | 0.036786259 | 0.031774727 |
| ENSG00000204435 | 0.019918043 | 0.026748932 | 0.028174181 | 0.017081368 |
| ENSG00000135480 | 0.053955961 | 0.036267575 | 0.031671126 | 0.031088069 |
| ENSG00000179409 | 0.032838244 | 0.0349903   | 0.034074995 | 0.027608953 |
| ENSG00000135956 | 0.023502096 | 0.036350851 | 0.040876794 | 0.022254925 |
| ENSG00000110446 | 0.048138792 | 0.038882838 | 0.042758275 | 0.032969472 |
| ENSG00000154277 | 0.128347032 | 0.140355757 | 0.119879585 | 0.146236602 |
| ENSG00000168038 | 0.017723154 | 0.026051295 | 0.025660856 | 0.016992741 |
| ENSG00000158887 | 0.02338185  | 0.029490109 | 0.032581346 | 0.018877174 |
| ENSG00000103657 | 0.040211746 | 0.036772777 | 0.041263589 | 0.038950669 |
| ENSG00000158545 | 0.024804213 | 0.030069543 | 0.031061715 | 0.027304024 |
| ENSG00000104884 | 0.028424806 | 0.029425395 | 0.032866657 | 0.022854579 |
| ENSG00000189139 | 0.015115511 | 0.025883386 | 0.024604791 | 0.014664719 |
| ENSG00000213020 | 0.031237493 | 0.035524982 | 0.037747428 | 0.028306347 |
| ENSG00000213465 | 0.032513738 | 0.036734402 | 0.034362242 | 0.026205201 |
| ENSG00000114204 | 0.014820319 | 0.024864249 | 0.025087131 | 0.013574359 |
| ENSG00000116962 | 0.065247865 | 0.053057743 | 0.045164793 | 0.056785258 |
| ENSG00000109511 | 0.016031721 | 0.025810936 | 0.025440201 | 0.014856571 |
| ENSG00000138658 | 0.017892546 | 0.025321518 | 0.025188897 | 0.01612991  |
| ENSG00000185222 | 0.082631492 | 0.062789339 | 0.045503955 | 0.062746084 |
| ENSG00000132341 | 0.037399013 | 0.037654369 | 0.034480929 | 0.037136426 |
| ENSG00000182257 | 0.016947684 | 0.024962597 | 0.024378545 | 0.015909608 |
| ENSG00000204599 | 0.02561068  | 0.032292074 | 0.036605011 | 0.019761356 |
| ENSG00000111332 | 0.053653469 | 0.042377097 | 0.040609529 | 0.041171041 |
| ENSG00000162946 | 0.037603547 | 0.031641038 | 0.027439124 | 0.027242737 |
| ENSG00000106105 | 0.023608986 | 0.029504943 | 0.029157671 | 0.022054259 |
| ENSG00000162595 | 0.01656121  | 0.02531199  | 0.024651586 | 0.015059913 |
| ENSG00000135447 | 0.015388094 | 0.025117971 | 0.025016754 | 0.015967279 |
| ENSG00000139193 | 0.033864383 | 0.043228677 | 0.036647082 | 0.053881731 |
| ENSG00000162598 | 0.016491698 | 0.025342664 | 0.025686252 | 0.016320658 |
| ENSG00000215475 | 0.014562459 | 0.024312788 | 0.024267848 | 0.014471202 |
| ENSG00000019991 | 0.025649162 | 0.02529797  | 0.026386141 | 0.025077331 |
| ENSG00000106392 | 0.054044828 | 0.049616623 | 0.046390147 | 0.048456052 |
| ENSG00000160951 | 0.015708195 | 0.025642544 | 0.024996919 | 0.014468698 |
| ENSG00000167792 | 0.023993518 | 0.029240479 | 0.029822022 | 0.019990646 |
| ENSG00000149021 | 0.019644792 | 0.026255471 | 0.025807079 | 0.016967303 |
| ENSG00000118579 | 0.024090482 | 0.033035339 | 0.031215784 | 0.026333426 |
| ENSG00000154930 | 0.047252872 | 0.044598615 | 0.035490471 | 0.039877528 |
| ENSG00000126001 | 0.026569096 | 0.02788037  | 0.031067051 | 0.020319304 |
| ENSG00000099875 | 0.065655217 | 0.056072484 | 0.050359557 | 0.064974376 |
| ENSG00000185681 | 0.016664292 | 0.026708638 | 0.024749231 | 0.016409826 |

|                 |             |             |             |             |
|-----------------|-------------|-------------|-------------|-------------|
| ENSG00000129255 | 0.032628177 | 0.030964752 | 0.032973595 | 0.032190887 |
| ENSG00000103888 | 0.017314366 | 0.02458554  | 0.024697859 | 0.015339723 |
| ENSG00000174946 | 0.058614901 | 0.074129314 | 0.079374062 | 0.085556575 |
| ENSG00000134222 | 0.063671885 | 0.041211674 | 0.037769311 | 0.04644056  |
| ENSG00000173914 | 0.030823761 | 0.032191841 | 0.034643087 | 0.02810943  |
| ENSG00000163931 | 0.023990892 | 0.027014521 | 0.02854379  | 0.021553302 |
| ENSG00000204748 | 0.020449291 | 0.025385034 | 0.026112917 | 0.018027207 |
| ENSG00000204256 | 0.024551087 | 0.032262039 | 0.03904121  | 0.021676466 |
| ENSG00000105767 | 0.017984256 | 0.025296519 | 0.025752633 | 0.016470366 |
| ENSG00000110395 | 0.018505799 | 0.025603936 | 0.025096191 | 0.016216632 |
| ENSG00000158901 | 0.015562248 | 0.024918849 | 0.024865369 | 0.01688624  |
| ENSG00000103037 | 0.038070964 | 0.035078126 | 0.031454014 | 0.03124126  |
| ENSG00000187741 | 0.022583629 | 0.029311149 | 0.029454125 | 0.019214498 |
| ENSG00000204536 | 0.03951127  | 0.046505026 | 0.040265719 | 0.035950066 |
| ENSG00000055483 | 0.061857516 | 0.077483749 | 0.060171845 | 0.044551533 |
| ENSG00000124568 | 0.016823803 | 0.025063656 | 0.024934524 | 0.016718152 |
| ENSG00000196814 | 0.016141696 | 0.026765698 | 0.026057325 | 0.017190134 |
| ENSG00000130182 | 0.015437162 | 0.02426946  | 0.026037585 | 0.015214522 |
| ENSG00000185187 | 0.027661648 | 0.029856491 | 0.030094018 | 0.026532138 |
| ENSG00000160972 | 0.041168925 | 0.046400356 | 0.03993135  | 0.032460356 |
| ENSG00000176601 | 0.019427384 | 0.026354611 | 0.029908651 | 0.01921868  |
| ENSG00000114784 | 0.02167357  | 0.029839224 | 0.030908045 | 0.021948675 |
| ENSG00000219073 | 0.015737841 | 0.02392381  | 0.025083791 | 0.015218762 |
| ENSG00000157335 | 0.015063344 | 0.024849973 | 0.025719155 | 0.01487507  |
| ENSG00000090554 | 0.025687762 | 0.028668749 | 0.033274641 | 0.027876667 |
| ENSG00000127990 | 0.058691283 | 0.055700697 | 0.055104102 | 0.05163737  |
| ENSG00000176697 | 0.016975567 | 0.024738927 | 0.024360237 | 0.015179125 |
| ENSG00000007038 | 0.089658792 | 0.082548985 | 0.061631097 | 0.043333674 |
| ENSG00000144468 | 0.037132551 | 0.039897298 | 0.035506945 | 0.034098398 |
| ENSG00000133302 | 0.042599913 | 0.049885582 | 0.034478839 | 0.031009409 |
| ENSG00000183826 | 0.01513165  | 0.024971551 | 0.025153837 | 0.014885114 |
| ENSG00000163093 | 0.034134023 | 0.029379864 | 0.033653853 | 0.031735712 |
| ENSG00000107175 | 0.030263069 | 0.032274582 | 0.037204356 | 0.027511386 |
| ENSG00000136738 | 0.034988975 | 0.040836471 | 0.039915846 | 0.035493634 |
| ENSG00000203666 | 0.083030207 | 0.070191842 | 0.084857252 | 0.070257766 |
| ENSG00000182199 | 0.029438621 | 0.029446889 | 0.028095391 | 0.022277291 |
| ENSG00000170185 | 0.026810992 | 0.035708678 | 0.032571908 | 0.027071442 |
| ENSG00000137434 | 0.033936415 | 0.029387059 | 0.029746091 | 0.037092918 |
| ENSG00000168994 | 0.085438541 | 0.082458785 | 0.056758244 | 0.073103508 |
| ENSG00000196954 | 0.030907173 | 0.030399974 | 0.034206582 | 0.021584896 |
| ENSG00000047249 | 0.022918275 | 0.032259816 | 0.029399078 | 0.022428362 |
| ENSG00000139800 | 0.015790684 | 0.025033457 | 0.02476246  | 0.014974091 |
| ENSG00000116830 | 0.032550467 | 0.031314365 | 0.03282633  | 0.025916901 |
| ENSG00000107862 | 0.025452392 | 0.032788424 | 0.033311177 | 0.029252539 |
| ENSG00000118655 | 0.052407801 | 0.055516137 | 0.04313417  | 0.058403452 |
| ENSG00000183628 | 0.019182082 | 0.027190269 | 0.025626949 | 0.017927913 |
| ENSG00000122557 | 0.030141036 | 0.037665893 | 0.031460411 | 0.039591866 |
| ENSG00000198931 | 0.024382976 | 0.030364255 | 0.03064704  | 0.031890715 |
| ENSG00000123200 | 0.020621158 | 0.026944427 | 0.028705431 | 0.019897794 |
| ENSG00000242485 | 0.022291441 | 0.027181126 | 0.027714309 | 0.022648616 |
| ENSG00000166888 | 0.031588477 | 0.040243953 | 0.040556987 | 0.038669732 |
| ENSG00000132881 | 0.015885699 | 0.024971894 | 0.024145235 | 0.015063317 |
| ENSG00000154582 | 0.020520741 | 0.027295426 | 0.026708171 | 0.018231295 |
| ENSG00000158161 | 0.017187552 | 0.027156441 | 0.025761034 | 0.017008496 |

|                 |             |             |             |             |
|-----------------|-------------|-------------|-------------|-------------|
| ENSG0000004809  | 0.020234954 | 0.025613241 | 0.025586124 | 0.014496686 |
| ENSG00000154845 | 0.030624854 | 0.035590949 | 0.039473352 | 0.033095032 |
| ENSG00000104835 | 0.02914848  | 0.031084974 | 0.030744035 | 0.025892694 |
| ENSG0000018869  | 0.028374127 | 0.035142499 | 0.035900318 | 0.025865694 |
| ENSG00000108590 | 0.017913125 | 0.026618458 | 0.025250862 | 0.016093677 |
| ENSG00000122970 | 0.015640247 | 0.025283449 | 0.025872525 | 0.015464463 |
| ENSG00000135828 | 0.035238989 | 0.042450713 | 0.036034337 | 0.028595012 |
| ENSG00000133983 | 0.025553671 | 0.032720339 | 0.030057509 | 0.02076335  |
| ENSG00000197780 | 0.021707904 | 0.027151406 | 0.028964585 | 0.020798257 |
| ENSG00000182307 | 0.034651759 | 0.034039824 | 0.034790101 | 0.027727416 |
| ENSG00000136870 | 0.032407855 | 0.03414727  | 0.031662002 | 0.026307289 |
| ENSG00000248483 | 0.015386306 | 0.025202705 | 0.025695521 | 0.014242717 |
| ENSG00000107105 | 0.016819366 | 0.026562167 | 0.02515713  | 0.016861452 |
| ENSG00000010327 | 0.016514364 | 0.025916749 | 0.024474108 | 0.01639355  |
| ENSG00000164047 | 0.097338829 | 0.065935228 | 0.070022396 | 0.083806938 |
| ENSG00000014164 | 0.023569745 | 0.03033335  | 0.037882212 | 0.024949928 |
| ENSG00000166153 | 0.015871584 | 0.025209225 | 0.025042081 | 0.015506199 |
| ENSG00000205268 | 0.050855626 | 0.057427129 | 0.050875082 | 0.048530861 |
| ENSG00000110880 | 0.026352445 | 0.03243344  | 0.030832821 | 0.020824142 |
| ENSG00000165028 | 0.031765914 | 0.043000987 | 0.040102486 | 0.031961755 |
| ENSG00000243444 | 0.014872612 | 0.024519337 | 0.02448185  | 0.014982428 |
| ENSG00000164054 | 0.042406932 | 0.037329139 | 0.037327156 | 0.0337727   |
| ENSG00000182132 | 0.016478889 | 0.023997404 | 0.024266035 | 0.015081953 |
| ENSG00000176170 | 0.01450618  | 0.024402745 | 0.024030802 | 0.014719267 |
| ENSG00000130950 | 0.015870483 | 0.025587147 | 0.025599777 | 0.016106247 |
| ENSG00000244624 | 0.015308779 | 0.025044397 | 0.024955226 | 0.014445963 |
| ENSG00000108384 | 0.043204129 | 0.059003692 | 0.047497257 | 0.033374548 |
| ENSG00000166851 | 0.050905437 | 0.032686339 | 0.04739466  | 0.041526139 |
| ENSG00000095627 | 0.070619331 | 0.049806618 | 0.036776276 | 0.023147373 |
| ENSG00000141965 | 0.026082421 | 0.040300036 | 0.047479894 | 0.03083272  |
| ENSG00000103313 | 0.015778064 | 0.025060574 | 0.025190969 | 0.01594449  |
| ENSG00000101442 | 0.034889651 | 0.036846544 | 0.034969993 | 0.026927381 |
| ENSG00000100714 | 0.037023654 | 0.036988785 | 0.033076426 | 0.027771427 |
| ENSG00000165244 | 0.01574607  | 0.025686751 | 0.026937244 | 0.01612367  |
| ENSG00000128654 | 0.028710584 | 0.032597927 | 0.028642202 | 0.022178124 |
| ENSG00000140545 | 0.095365355 | 0.064854591 | 0.064841572 | 0.075792395 |
| ENSG00000111615 | 0.029544083 | 0.039985364 | 0.029018629 | 0.025459399 |
| ENSG00000099246 | 0.024002953 | 0.031768287 | 0.031628356 | 0.031254628 |
| ENSG00000138166 | 0.045321295 | 0.048482455 | 0.056646141 | 0.046910052 |
| ENSG00000079263 | 0.051723238 | 0.042718197 | 0.049879027 | 0.046255574 |
| ENSG00000155875 | 0.016166406 | 0.025167534 | 0.025006011 | 0.016367397 |
| ENSG00000125931 | 0.015260608 | 0.025386368 | 0.025042656 | 0.014245216 |
| ENSG00000131778 | 0.031263724 | 0.037493645 | 0.029950961 | 0.027619659 |
| ENSG00000174448 | 0.016731582 | 0.025561649 | 0.025381868 | 0.016123881 |
| ENSG00000003056 | 0.021249815 | 0.030745907 | 0.029282547 | 0.018303721 |
| ENSG00000153214 | 0.026098807 | 0.034983484 | 0.029454528 | 0.020720204 |
| ENSG00000135437 | 0.047701608 | 0.036444467 | 0.033247692 | 0.036911701 |
| ENSG00000173327 | 0.022508861 | 0.035606819 | 0.045244007 | 0.028361781 |
| ENSG00000138315 | 0.015228436 | 0.025587249 | 0.024112356 | 0.014437762 |
| ENSG00000111252 | 0.033828558 | 0.051585528 | 0.051611873 | 0.066380319 |
| ENSG00000185201 | 0.070022219 | 0.049256212 | 0.053294509 | 0.058037003 |
| ENSG00000104953 | 0.033349525 | 0.035841639 | 0.034290931 | 0.030975424 |
| ENSG00000069399 | 0.03364882  | 0.042480237 | 0.051740437 | 0.043303812 |
| ENSG00000242550 | 0.128461196 | 0.106860691 | 0.092398654 | 0.097334954 |

|                 |             |             |             |             |
|-----------------|-------------|-------------|-------------|-------------|
| ENSG00000169490 | 0.026547491 | 0.032961144 | 0.033891063 | 0.026016558 |
| ENSG00000166508 | 0.014911784 | 0.02532238  | 0.025025603 | 0.016948509 |
| ENSG00000108179 | 0.040826899 | 0.033992652 | 0.038958331 | 0.036809984 |
| ENSG00000206203 | 0.018019566 | 0.026772238 | 0.029185855 | 0.016281239 |
| ENSG00000131050 | 0.015405282 | 0.024206337 | 0.025160239 | 0.014749084 |
| ENSG00000162512 | 0.055938692 | 0.048283262 | 0.044788043 | 0.033833098 |
| ENSG00000151748 | 0.037541402 | 0.042861091 | 0.038755344 | 0.030724071 |
| ENSG00000138303 | 0.032625421 | 0.033627574 | 0.032268151 | 0.025587718 |
| ENSG00000204700 | 0.017284937 | 0.026854675 | 0.026423267 | 0.016138643 |
| ENSG00000186665 | 0.018529443 | 0.02710937  | 0.026819331 | 0.018377286 |
| ENSG00000168062 | 0.016696077 | 0.025330686 | 0.024881639 | 0.015919102 |
| ENSG00000104613 | 0.034026859 | 0.036589477 | 0.033404319 | 0.022779724 |
| ENSG00000124116 | 0.018839355 | 0.027619019 | 0.026866943 | 0.017871241 |
| ENSG00000141096 | 0.019579518 | 0.029801824 | 0.038173533 | 0.017323642 |
| ENSG00000136193 | 0.03322884  | 0.0344836   | 0.030704158 | 0.031949714 |
| ENSG00000165449 | 0.07321246  | 0.065373412 | 0.050557786 | 0.063095084 |
| ENSG00000130429 | 0.022065828 | 0.027827866 | 0.028047426 | 0.02180616  |
| ENSG00000174839 | 0.036076206 | 0.034746013 | 0.035732701 | 0.02890957  |
| ENSG00000127226 | 0.031656002 | 0.035303755 | 0.037387584 | 0.032901595 |
| ENSG00000157404 | 0.021917936 | 0.031542157 | 0.029080123 | 0.038163985 |
| ENSG00000204614 | 0.01562457  | 0.024742465 | 0.024228888 | 0.015174663 |
| ENSG00000143793 | 0.029600165 | 0.030616822 | 0.03147476  | 0.021395741 |
| ENSG00000173338 | 0.015319955 | 0.024492976 | 0.024750519 | 0.015118563 |
| ENSG00000147164 | 0.024259504 | 0.030500234 | 0.028707911 | 0.025861456 |
| ENSG00000203797 | 0.018482401 | 0.025192236 | 0.025983183 | 0.015066172 |
| ENSG00000128422 | 0.108209552 | 0.085609622 | 0.064350913 | 0.082868867 |
| ENSG00000104903 | 0.060421482 | 0.056354582 | 0.046709619 | 0.049199835 |
| ENSG00000130024 | 0.045043114 | 0.046403503 | 0.039674318 | 0.030259379 |
| ENSG00000160932 | 0.047379718 | 0.036831665 | 0.041009477 | 0.035047191 |
| ENSG00000071246 | 0.029986081 | 0.038330313 | 0.029676682 | 0.027735616 |
| ENSG00000170777 | 0.017415334 | 0.026400247 | 0.026381828 | 0.017390975 |
| ENSG00000178662 | 0.028569413 | 0.02902966  | 0.024440254 | 0.015578471 |
| ENSG00000135486 | 0.017970929 | 0.025464004 | 0.024758106 | 0.016858951 |
| ENSG00000057608 | 0.02280525  | 0.029320773 | 0.026528437 | 0.019219976 |
| ENSG00000100697 | 0.016489098 | 0.024795658 | 0.025067721 | 0.016431639 |
| ENSG00000163520 | 0.016722998 | 0.025127692 | 0.024541917 | 0.015369237 |
| ENSG00000158869 | 0.025227628 | 0.053314413 | 0.045862954 | 0.051489906 |
| ENSG00000149418 | 0.017612414 | 0.026803272 | 0.025471953 | 0.017014189 |
| ENSG00000105202 | 0.022788569 | 0.026033758 | 0.026229162 | 0.02062011  |
| ENSG00000101871 | 0.014967537 | 0.02528541  | 0.024301465 | 0.014879449 |
| ENSG00000077684 | 0.02401949  | 0.033836939 | 0.028911047 | 0.020300297 |
| ENSG00000198730 | 0.030754069 | 0.04113492  | 0.03388525  | 0.030377664 |
| ENSG00000158258 | 0.016865269 | 0.025119983 | 0.025410136 | 0.017595218 |
| ENSG00000138459 | 0.023571236 | 0.036164377 | 0.032108494 | 0.024071475 |
| ENSG00000213995 | 0.029707802 | 0.035780613 | 0.036066123 | 0.02463013  |
| ENSG00000120438 | 0.026451467 | 0.031233249 | 0.027686613 | 0.020817359 |
| ENSG00000124205 | 0.016903006 | 0.025160952 | 0.025043226 | 0.016447001 |
| ENSG00000136942 | 0.01320482  | 0.023754781 | 0.024064533 | 0.014288458 |
| ENSG00000158955 | 0.016002882 | 0.024708143 | 0.024410051 | 0.016100703 |
| ENSG00000165115 | 0.014811405 | 0.02484244  | 0.025537559 | 0.015743714 |
| ENSG00000138435 | 0.020110865 | 0.027324789 | 0.026473188 | 0.015769435 |
| ENSG00000184508 | 0.028689027 | 0.032383133 | 0.03255743  | 0.028273497 |
| ENSG00000186038 | 0.015906429 | 0.024431698 | 0.025400263 | 0.015176426 |
| ENSG00000198793 | 0.030616042 | 0.040698349 | 0.032879739 | 0.02916835  |



|                 |             |             |             |             |
|-----------------|-------------|-------------|-------------|-------------|
| ENSG00000196367 | 0.032571887 | 0.03731573  | 0.03349451  | 0.025937035 |
| ENSG00000102243 | 0.015626045 | 0.02447208  | 0.025714931 | 0.01549993  |
| ENSG00000143643 | 0.035104452 | 0.037442808 | 0.036097404 | 0.026764428 |
| ENSG00000198826 | 0.040650182 | 0.035209725 | 0.033032931 | 0.031764271 |
| ENSG00000181499 | 0.01660055  | 0.026160869 | 0.025775159 | 0.016385713 |
| ENSG00000197753 | 0.016867201 | 0.02588373  | 0.025741746 | 0.014431109 |
| ENSG00000211460 | 0.039698893 | 0.036943641 | 0.037602803 | 0.048687963 |
| ENSG00000172497 | 0.017198085 | 0.026451292 | 0.024975654 | 0.015438751 |
| ENSG00000100084 | 0.031418849 | 0.032546642 | 0.034678421 | 0.030759988 |
| ENSG00000171853 | 0.022966014 | 0.031158929 | 0.034405565 | 0.026025204 |
| ENSG00000162408 | 0.022098682 | 0.026640883 | 0.02711335  | 0.024203529 |
| ENSG00000073734 | 0.015736332 | 0.025748566 | 0.024582382 | 0.016939255 |
| ENSG00000124391 | 0.016684281 | 0.026738169 | 0.024179028 | 0.015886756 |
| ENSG00000142676 | 0.014445745 | 0.024227066 | 0.024239845 | 0.015256792 |
| ENSG00000151474 | 0.101482634 | 0.085796455 | 0.076494348 | 0.081280939 |
| ENSG00000161533 | 0.016278375 | 0.024781549 | 0.024802504 | 0.015498212 |
| ENSG00000164346 | 0.020969072 | 0.026373463 | 0.026266787 | 0.023352286 |
| ENSG00000100422 | 0.016458478 | 0.025082801 | 0.025021862 | 0.015957952 |
| ENSG00000204822 | 0.018626424 | 0.029533956 | 0.032137063 | 0.024332733 |
| ENSG00000105983 | 0.029628119 | 0.036023084 | 0.031650206 | 0.022546799 |
| ENSG00000204616 | 0.016416328 | 0.024540787 | 0.025333759 | 0.015003112 |
| ENSG00000080839 | 0.029390225 | 0.034706974 | 0.027843569 | 0.020576087 |
| ENSG00000072958 | 0.022620613 | 0.028997996 | 0.028880384 | 0.026280133 |
| ENSG00000061492 | 0.015628718 | 0.025158732 | 0.024520498 | 0.016418457 |
| ENSG00000167634 | 0.119278735 | 0.087567963 | 0.093822008 | 0.094384445 |
| ENSG00000125409 | 0.014925825 | 0.024324976 | 0.02533252  | 0.016309209 |
| ENSG00000152430 | 0.016574206 | 0.026426192 | 0.025374882 | 0.017281369 |
| ENSG00000197808 | 0.031816629 | 0.0387319   | 0.040025949 | 0.03022711  |
| ENSG00000148834 | 0.027263273 | 0.029715757 | 0.029437032 | 0.030038057 |
| ENSG00000172818 | 0.021876728 | 0.028311349 | 0.027893433 | 0.02215918  |
| ENSG00000182261 | 0.016069692 | 0.025829053 | 0.025444903 | 0.016071028 |
| ENSG00000170917 | 0.034990034 | 0.034949099 | 0.032270931 | 0.028721135 |
| ENSG00000104812 | 0.035704587 | 0.034401735 | 0.034685773 | 0.032715365 |
| ENSG00000088832 | 0.024826938 | 0.030457823 | 0.029206501 | 0.025179227 |
| ENSG00000166069 | 0.015166207 | 0.024730892 | 0.025207468 | 0.015386756 |
| ENSG00000241553 | 0.025775468 | 0.030802958 | 0.032006241 | 0.028895631 |
| ENSG00000205352 | 0.01986995  | 0.028285255 | 0.027426765 | 0.018917991 |
| ENSG00000184719 | 0.016292985 | 0.025205298 | 0.025545859 | 0.016127872 |
| ENSG00000131373 | 0.025636185 | 0.032084053 | 0.031761998 | 0.022591428 |
| ENSG00000185386 | 0.024241058 | 0.030904144 | 0.02881379  | 0.026155043 |
| ENSG00000165509 | 0.016334295 | 0.025504096 | 0.025513117 | 0.015911636 |
| ENSG00000244187 | 0.033453902 | 0.031370528 | 0.028583378 | 0.029801145 |
| ENSG00000162493 | 0.016084403 | 0.027185761 | 0.025915412 | 0.017093651 |
| ENSG00000203933 | 0.015663633 | 0.025765233 | 0.025878428 | 0.014702078 |
| ENSG00000114473 | 0.076374682 | 0.106804685 | 0.068273836 | 0.088745036 |
| ENSG00000196209 | 0.017353335 | 0.027274357 | 0.024944372 | 0.016042897 |
| ENSG00000011638 | 0.055902196 | 0.043797391 | 0.042949983 | 0.052880589 |
| ENSG00000143933 | 0.019049162 | 0.027189253 | 0.026907256 | 0.018970534 |
| ENSG00000000460 | 0.051072343 | 0.053065555 | 0.05010576  | 0.035864924 |
| ENSG00000128408 | 0.018263894 | 0.025427962 | 0.025286635 | 0.017087636 |
| ENSG00000171132 | 0.018407461 | 0.028011576 | 0.028241424 | 0.020196449 |
| ENSG00000130511 | 0.03683141  | 0.030474013 | 0.037138751 | 0.030400811 |
| ENSG00000147036 | 0.015217745 | 0.024815209 | 0.024887596 | 0.014429895 |
| ENSG00000124635 | 0.071316909 | 0.060965451 | 0.064444825 | 0.061457664 |

|                 |             |             |             |             |
|-----------------|-------------|-------------|-------------|-------------|
| ENSG00000133315 | 0.033477453 | 0.03649404  | 0.0358453   | 0.027002237 |
| ENSG00000167107 | 0.052951377 | 0.037795532 | 0.041779246 | 0.05222762  |
| ENSG00000015532 | 0.028353216 | 0.029316923 | 0.029705014 | 0.025579041 |
| ENSG00000120733 | 0.024915259 | 0.033832253 | 0.031096775 | 0.021453634 |
| ENSG00000163156 | 0.023506338 | 0.032380563 | 0.033987382 | 0.022014136 |
| ENSG00000186908 | 0.028331902 | 0.033302501 | 0.031921979 | 0.026002254 |
| ENSG00000108465 | 0.028990825 | 0.031299723 | 0.032635736 | 0.024586401 |
| ENSG00000152256 | 0.051897    | 0.051460606 | 0.039770542 | 0.051495292 |
| ENSG00000131475 | 0.02209975  | 0.029107112 | 0.030680877 | 0.022627685 |
| ENSG00000171988 | 0.032945713 | 0.036541486 | 0.034200107 | 0.031864698 |
| ENSG00000168913 | 0.014872824 | 0.024752319 | 0.024900469 | 0.014427863 |
| ENSG00000127412 | 0.015242172 | 0.024803838 | 0.024248595 | 0.01550751  |
| ENSG00000168350 | 0.017889944 | 0.0274438   | 0.025995101 | 0.018423198 |
| ENSG00000165637 | 0.021737406 | 0.027485888 | 0.027111523 | 0.019938875 |
| ENSG00000168903 | 0.01885588  | 0.02532     | 0.027199192 | 0.017296156 |
| ENSG00000163376 | 0.049605987 | 0.071440371 | 0.064022169 | 0.066132552 |
| ENSG00000164418 | 0.015646447 | 0.024702218 | 0.024868443 | 0.015791898 |
| ENSG00000111642 | 0.027355783 | 0.032203474 | 0.033793433 | 0.025037363 |
| ENSG00000221857 | 0.015649101 | 0.025004872 | 0.025727677 | 0.015869737 |
| ENSG00000152518 | 0.036596334 | 0.047061013 | 0.042994904 | 0.038893069 |
| ENSG00000081041 | 0.029385701 | 0.02840402  | 0.027360618 | 0.018931629 |
| ENSG00000170727 | 0.034772206 | 0.033267353 | 0.035276369 | 0.031929044 |
| ENSG00000197622 | 0.035791567 | 0.042365757 | 0.048723644 | 0.03561906  |
| ENSG00000197183 | 0.023247664 | 0.02702504  | 0.025869106 | 0.019901714 |
| ENSG00000135655 | 0.029225227 | 0.036589177 | 0.032771058 | 0.026767219 |
| ENSG00000173894 | 0.015716026 | 0.024736807 | 0.025434988 | 0.01510802  |
| ENSG00000214265 | 0.041913188 | 0.029579787 | 0.031629225 | 0.027192639 |
| ENSG00000132749 | 0.01820519  | 0.026683896 | 0.026938727 | 0.017904907 |
| ENSG00000196341 | 0.016239046 | 0.025065105 | 0.02415687  | 0.014871491 |
| ENSG00000088930 | 0.022923171 | 0.029739475 | 0.030747197 | 0.021112028 |
| ENSG00000152969 | 0.137597309 | 0.10033782  | 0.090643132 | 0.115704037 |
| ENSG00000150630 | 0.016148349 | 0.024527263 | 0.024734037 | 0.016394427 |
| ENSG00000088538 | 0.015154818 | 0.024708621 | 0.024955763 | 0.014768074 |
| ENSG00000112246 | 0.018929276 | 0.02625695  | 0.026532639 | 0.018527433 |
| ENSG00000119522 | 0.049437865 | 0.04119878  | 0.039488672 | 0.039260851 |
| ENSG00000253506 | 0.031502962 | 0.04257552  | 0.034575083 | 0.064985461 |
| ENSG00000215021 | 0.023157549 | 0.030020225 | 0.02941145  | 0.019221837 |
| ENSG00000117308 | 0.033695296 | 0.031436195 | 0.038215941 | 0.031520674 |
| ENSG00000148429 | 0.051575952 | 0.043419464 | 0.048351888 | 0.039958701 |
| ENSG00000178386 | 0.024899544 | 0.029320853 | 0.025245002 | 0.019452044 |
| ENSG00000162670 | 0.016641807 | 0.024658595 | 0.024115865 | 0.016123877 |
| ENSG00000182831 | 0.028557038 | 0.036368339 | 0.035362777 | 0.027188784 |
| ENSG00000189320 | 0.015035705 | 0.024194329 | 0.024363985 | 0.014904706 |
| ENSG00000163689 | 0.026399018 | 0.028828083 | 0.025849589 | 0.028116257 |
| ENSG00000148660 | 0.036465661 | 0.035509655 | 0.030944508 | 0.029362839 |
| ENSG00000115590 | 0.128696264 | 0.073136487 | 0.05435888  | 0.092311328 |
| ENSG00000136819 | 0.029142496 | 0.034002469 | 0.032507196 | 0.02462958  |
| ENSG00000185721 | 0.023231506 | 0.029417494 | 0.029506921 | 0.017810809 |
| ENSG00000079805 | 0.023437899 | 0.030351973 | 0.035810343 | 0.025768362 |
| ENSG00000085377 | 0.034416722 | 0.039877507 | 0.03478144  | 0.025367236 |
| ENSG00000066117 | 0.017912911 | 0.028027838 | 0.027354936 | 0.019880141 |
| ENSG00000111348 | 0.023422642 | 0.028196273 | 0.026202174 | 0.021094602 |
| ENSG00000215186 | 0.016074356 | 0.025095862 | 0.025323641 | 0.015907514 |
| ENSG00000105355 | 0.030602924 | 0.030925481 | 0.033903303 | 0.029905377 |

|                 |             |             |             |             |
|-----------------|-------------|-------------|-------------|-------------|
| ENSG00000140931 | 0.017707483 | 0.024508159 | 0.026050637 | 0.015710666 |
| ENSG00000115884 | 0.137696539 | 0.1193151   | 0.108205495 | 0.121850354 |
| ENSG00000130829 | 0.02230537  | 0.028281225 | 0.032147498 | 0.019362816 |
| ENSG00000183621 | 0.03634033  | 0.036709728 | 0.035180859 | 0.032323352 |
| ENSG00000099783 | 0.024127858 | 0.028400143 | 0.028055065 | 0.027115564 |
| ENSG00000007968 | 0.079053173 | 0.055363975 | 0.049580633 | 0.057532069 |
| ENSG00000136521 | 0.022729675 | 0.030300095 | 0.027210327 | 0.020559174 |
| ENSG00000161634 | 0.015541045 | 0.02653573  | 0.024374409 | 0.015928484 |
| ENSG00000091039 | 0.026446051 | 0.032082719 | 0.034249068 | 0.033731878 |
| ENSG00000204655 | 0.016418449 | 0.024437407 | 0.025163399 | 0.01636488  |
| ENSG00000102606 | 0.020225589 | 0.031081747 | 0.027563361 | 0.018647849 |
| ENSG00000150776 | 0.025267988 | 0.03771951  | 0.039523953 | 0.030270814 |
| ENSG00000213865 | 0.017985613 | 0.02578682  | 0.024621237 | 0.016950003 |
| ENSG00000211450 | 0.019360349 | 0.026971433 | 0.026682152 | 0.01756045  |
| ENSG00000120708 | 0.091227827 | 0.061279918 | 0.044472298 | 0.100913323 |
| ENSG00000167754 | 0.016531229 | 0.025478302 | 0.024953814 | 0.014552175 |
| ENSG00000089693 | 0.02070369  | 0.029035429 | 0.035116644 | 0.023740171 |
| ENSG00000163344 | 0.028931637 | 0.034600087 | 0.032716723 | 0.026089221 |
| ENSG00000103335 | 0.031315661 | 0.034630735 | 0.036158084 | 0.032656613 |
| ENSG00000167858 | 0.019251623 | 0.025918701 | 0.026018243 | 0.019751837 |
| ENSG00000149474 | 0.030947955 | 0.03349045  | 0.033639402 | 0.026863203 |
| ENSG00000156253 | 0.0482064   | 0.040727076 | 0.03238743  | 0.037747792 |
| ENSG00000184925 | 0.015715809 | 0.026059857 | 0.025129197 | 0.016318382 |
| ENSG00000111481 | 0.021778121 | 0.030037941 | 0.031423067 | 0.021952535 |
| ENSG00000165495 | 0.016456404 | 0.025417893 | 0.025818414 | 0.015962789 |
| ENSG00000101654 | 0.02971262  | 0.031637939 | 0.032259744 | 0.026624055 |
| ENSG00000141644 | 0.031077287 | 0.031812919 | 0.038128763 | 0.036747695 |
| ENSG00000150768 | 0.029234257 | 0.034767479 | 0.029563329 | 0.034577975 |
| ENSG00000107882 | 0.018084889 | 0.026293634 | 0.026271466 | 0.018553253 |
| ENSG00000135821 | 0.084242834 | 0.067060874 | 0.046364383 | 0.055435862 |
| ENSG00000165806 | 0.018258168 | 0.026722144 | 0.024652791 | 0.019780728 |
| ENSG00000135631 | 0.015525393 | 0.024979046 | 0.02526708  | 0.016189749 |
| ENSG00000184988 | 0.030590081 | 0.035803893 | 0.032019288 | 0.032167773 |
| ENSG00000115241 | 0.030692698 | 0.031410284 | 0.028936375 | 0.024758684 |
| ENSG00000164778 | 0.015994168 | 0.024314684 | 0.025306417 | 0.01621964  |
| ENSG00000089558 | 0.016758894 | 0.025539251 | 0.025318603 | 0.016342005 |
| ENSG00000134539 | 0.016139075 | 0.024612552 | 0.024617838 | 0.01594799  |
| ENSG00000180884 | 0.031563789 | 0.036889046 | 0.032656335 | 0.022761476 |
| ENSG00000139287 | 0.016511218 | 0.025551412 | 0.024968663 | 0.01534696  |
| ENSG00000105373 | 0.021278774 | 0.029262117 | 0.027308213 | 0.022515269 |
| ENSG00000076650 | 0.034392376 | 0.032882157 | 0.039116426 | 0.024573732 |
| ENSG00000104290 | 0.066887167 | 0.048755234 | 0.050009756 | 0.057284898 |
| ENSG00000054282 | 0.033446996 | 0.035769393 | 0.033489714 | 0.031188362 |
| ENSG00000111713 | 0.015556258 | 0.0249812   | 0.025227929 | 0.015501166 |
| ENSG00000133818 | 0.034940073 | 0.035882265 | 0.033363779 | 0.027474803 |
| ENSG00000253159 | 0.017834147 | 0.024666    | 0.024884684 | 0.01584175  |
| ENSG00000084207 | 0.030929611 | 0.033486649 | 0.034584807 | 0.029269745 |
| ENSG00000108582 | 0.038309373 | 0.040509973 | 0.034876317 | 0.029709449 |
| ENSG00000173511 | 0.035712999 | 0.032561669 | 0.036037894 | 0.0345407   |
| ENSG00000100234 | 0.016054716 | 0.024338125 | 0.024852409 | 0.014690578 |
| ENSG00000115361 | 0.016578477 | 0.024789211 | 0.024905343 | 0.015894789 |
| ENSG00000166446 | 0.017018253 | 0.024900868 | 0.024598683 | 0.016783022 |
| ENSG00000124253 | 0.015507525 | 0.025196056 | 0.02433966  | 0.015133192 |
| ENSG00000162650 | 0.030491929 | 0.031981603 | 0.040067308 | 0.033224215 |

|                 |             |             |             |             |
|-----------------|-------------|-------------|-------------|-------------|
| ENSG00000158528 | 0.015847095 | 0.025122273 | 0.025769676 | 0.014797913 |
| ENSG00000228198 | 0.014372038 | 0.024524942 | 0.024689629 | 0.016472732 |
| ENSG00000169224 | 0.01589128  | 0.024910679 | 0.024968909 | 0.015396518 |
| ENSG00000161036 | 0.040242478 | 0.040920226 | 0.039758389 | 0.040227852 |
| ENSG00000111907 | 0.039819989 | 0.02486291  | 0.02537188  | 0.015812581 |
| ENSG00000187239 | 0.019128663 | 0.027479339 | 0.02573012  | 0.018536846 |
| ENSG00000106336 | 0.021015843 | 0.026051122 | 0.026038193 | 0.017695857 |
| ENSG00000160679 | 0.026462044 | 0.030778668 | 0.027995186 | 0.021824904 |
| ENSG00000163515 | 0.018967506 | 0.025907324 | 0.026097355 | 0.022077342 |
| ENSG00000177888 | 0.016692775 | 0.024911751 | 0.025373642 | 0.017537151 |
| ENSG00000180697 | 0.015172629 | 0.02503389  | 0.024582552 | 0.015620802 |
| ENSG00000167680 | 0.015925707 | 0.026731205 | 0.025550006 | 0.017139083 |
| ENSG00000205085 | 0.016976013 | 0.024863779 | 0.024975069 | 0.014652925 |
| ENSG00000198053 | 0.107844516 | 0.068761856 | 0.078912272 | 0.078370877 |
| ENSG00000204713 | 0.030938372 | 0.030068811 | 0.032143967 | 0.026199428 |
| ENSG00000049449 | 0.036047873 | 0.0354458   | 0.033964645 | 0.037259035 |
| ENSG00000170484 | 0.015457713 | 0.024327138 | 0.024777017 | 0.016148935 |
| ENSG00000143850 | 0.018785579 | 0.025859008 | 0.025308349 | 0.016131698 |
| ENSG00000178999 | 0.042380627 | 0.03225696  | 0.033756428 | 0.029602726 |
| ENSG00000240764 | 0.015518284 | 0.02437871  | 0.024682014 | 0.014325406 |
| ENSG00000156738 | 0.053071709 | 0.059582155 | 0.053405366 | 0.052682947 |
| ENSG00000166526 | 0.018301488 | 0.024858064 | 0.024576431 | 0.015639038 |
| ENSG00000139746 | 0.029442452 | 0.034159808 | 0.02954704  | 0.024925099 |
| ENSG00000104497 | 0.043628177 | 0.044125158 | 0.043272308 | 0.03171177  |
| ENSG00000092445 | 0.015584946 | 0.02640505  | 0.024677019 | 0.015329973 |
| ENSG00000122121 | 0.025673624 | 0.028527658 | 0.029300345 | 0.023377503 |
| ENSG00000121966 | 0.082594271 | 0.0582108   | 0.054204836 | 0.071448093 |
| ENSG00000077009 | 0.021703861 | 0.027724985 | 0.026063072 | 0.019442757 |
| ENSG00000135108 | 0.031348436 | 0.037325455 | 0.036568074 | 0.030604005 |
| ENSG00000116786 | 0.027767007 | 0.032260194 | 0.03816723  | 0.026190378 |
| ENSG00000183696 | 0.016388968 | 0.026333691 | 0.026155493 | 0.015901367 |
| ENSG00000164976 | 0.019782174 | 0.025267885 | 0.025101526 | 0.0147995   |
| ENSG00000162614 | 0.075580672 | 0.067707456 | 0.050958925 | 0.046067162 |
| ENSG00000181135 | 0.02004349  | 0.028611985 | 0.029272452 | 0.021973946 |
| ENSG00000214078 | 0.042038613 | 0.043728245 | 0.038200286 | 0.037282009 |
| ENSG00000113658 | 0.042535663 | 0.037699739 | 0.03822712  | 0.038593778 |
| ENSG00000214309 | 0.020723976 | 0.02584017  | 0.027758286 | 0.018642238 |
| ENSG00000154473 | 0.025144301 | 0.032198563 | 0.030726234 | 0.026247255 |
| ENSG00000123415 | 0.02591381  | 0.031648344 | 0.027765912 | 0.018624175 |
| ENSG00000112763 | 0.030924749 | 0.036865209 | 0.033531229 | 0.025115873 |
| ENSG00000147896 | 0.016539038 | 0.025530319 | 0.025676038 | 0.016616718 |
| ENSG00000005379 | 0.053671672 | 0.046686382 | 0.046253021 | 0.054834786 |
| ENSG00000028137 | 0.046518678 | 0.040441956 | 0.034917677 | 0.041045373 |
| ENSG00000205189 | 0.02928216  | 0.033675875 | 0.03448439  | 0.028637118 |
| ENSG00000004848 | 0.018970124 | 0.026091647 | 0.024457658 | 0.019682593 |
| ENSG00000102226 | 0.024953993 | 0.027888942 | 0.030067355 | 0.02161817  |
| ENSG00000117560 | 0.01527278  | 0.025119658 | 0.024413342 | 0.015458237 |
| ENSG00000136449 | 0.015360079 | 0.025000246 | 0.024727555 | 0.0147283   |
| ENSG00000204967 | 0.015378176 | 0.024923284 | 0.025673471 | 0.014585213 |
| ENSG00000139350 | 0.048911886 | 0.048996605 | 0.04238374  | 0.045316693 |
| ENSG00000145730 | 0.049429607 | 0.041306687 | 0.042104279 | 0.040152154 |
| ENSG00000183023 | 0.016628581 | 0.024636107 | 0.024585215 | 0.016152567 |
| ENSG00000069020 | 0.041918747 | 0.028565262 | 0.034444926 | 0.030205671 |
| ENSG00000163633 | 0.020461804 | 0.027545349 | 0.025446336 | 0.017795567 |

|                 |             |             |             |             |
|-----------------|-------------|-------------|-------------|-------------|
| ENSG00000177459 | 0.122108632 | 0.077140257 | 0.080737783 | 0.08451474  |
| ENSG00000161298 | 0.01843226  | 0.025859565 | 0.026621714 | 0.018350947 |
| ENSG00000146729 | 0.027013241 | 0.031633341 | 0.031030281 | 0.032187024 |
| ENSG00000166573 | 0.015121311 | 0.02572269  | 0.024142435 | 0.014752382 |
| ENSG00000184357 | 0.056478788 | 0.03785126  | 0.048001841 | 0.056060768 |
| ENSG00000131845 | 0.025201866 | 0.035572597 | 0.034224532 | 0.021900996 |
| ENSG00000145864 | 0.016907057 | 0.0255887   | 0.02552668  | 0.01606047  |
| ENSG00000100410 | 0.033025104 | 0.034946053 | 0.03765651  | 0.030724348 |
| ENSG00000205981 | 0.032166648 | 0.030192909 | 0.03056864  | 0.021936244 |
| ENSG00000167797 | 0.038699556 | 0.035010939 | 0.033891274 | 0.036500224 |
| ENSG00000132846 | 0.04617484  | 0.040761805 | 0.037339118 | 0.038371134 |
| ENSG00000105058 | 0.021573832 | 0.028889514 | 0.033064565 | 0.02173181  |
| ENSG00000136155 | 0.019529968 | 0.027479241 | 0.026962532 | 0.018799227 |
| ENSG00000163121 | 0.133736789 | 0.08589833  | 0.094848622 | 0.114613634 |
| ENSG00000243335 | 0.018310449 | 0.025905056 | 0.024789398 | 0.01576285  |
| ENSG00000161671 | 0.026629655 | 0.032414426 | 0.031609616 | 0.027680074 |
| ENSG00000169093 | 0.033657894 | 0.034107653 | 0.042900303 | 0.044681262 |
| ENSG00000158786 | 0.015428609 | 0.025640859 | 0.02465825  | 0.015526099 |
| ENSG00000152495 | 0.039650361 | 0.046883258 | 0.037645985 | 0.039932968 |
| ENSG00000115604 | 0.135415444 | 0.112256187 | 0.103474972 | 0.119414198 |
| ENSG00000162813 | 0.030708161 | 0.036510276 | 0.031065647 | 0.026266512 |
| ENSG00000100350 | 0.037989338 | 0.03362529  | 0.031260065 | 0.028681778 |
| ENSG00000231852 | 0.016076159 | 0.025640539 | 0.025949225 | 0.015693847 |
| ENSG00000198440 | 0.020363051 | 0.02591716  | 0.028484777 | 0.023038917 |
| ENSG00000151093 | 0.029193758 | 0.033857772 | 0.028653219 | 0.021112382 |
| ENSG00000118600 | 0.033977386 | 0.032041636 | 0.033758742 | 0.030425264 |
| ENSG00000109133 | 0.037812675 | 0.037101436 | 0.03129955  | 0.033606508 |
| ENSG00000189129 | 0.015108425 | 0.024972269 | 0.025009169 | 0.014632021 |
| ENSG00000023318 | 0.023740617 | 0.028964414 | 0.027711848 | 0.019155667 |
| ENSG00000141934 | 0.01558649  | 0.025175162 | 0.02582433  | 0.015935973 |
| ENSG00000019169 | 0.031080031 | 0.029540217 | 0.027407462 | 0.021791996 |
| ENSG00000183036 | 0.016739785 | 0.025386756 | 0.024791611 | 0.015026906 |
| ENSG00000169314 | 0.015981935 | 0.025450617 | 0.024211108 | 0.015058176 |
| ENSG00000156958 | 0.037710065 | 0.037199012 | 0.03269758  | 0.029819257 |
| ENSG00000046889 | 0.023394115 | 0.030413238 | 0.028442111 | 0.023583297 |
| ENSG00000101190 | 0.06938211  | 0.063159365 | 0.049845124 | 0.056877644 |
| ENSG00000187990 | 0.055007166 | 0.044150273 | 0.045860148 | 0.043087192 |
| ENSG00000186073 | 0.041595374 | 0.042405594 | 0.032209223 | 0.034163969 |
| ENSG00000101751 | 0.034911489 | 0.037247971 | 0.031290981 | 0.033357132 |
| ENSG00000173531 | 0.047551791 | 0.049509563 | 0.042821141 | 0.051148286 |
| ENSG00000179562 | 0.025733549 | 0.039867335 | 0.041793225 | 0.025584531 |
| ENSG00000184788 | 0.0204708   | 0.024717608 | 0.032758293 | 0.016611584 |
| ENSG00000164451 | 0.017038455 | 0.024671629 | 0.025236521 | 0.016030274 |
| ENSG00000125898 | 0.045746241 | 0.050272573 | 0.039017568 | 0.038642624 |
| ENSG00000164935 | 0.01641673  | 0.025368573 | 0.024499237 | 0.014883826 |
| ENSG00000132780 | 0.022631477 | 0.027880209 | 0.027643325 | 0.020937905 |
| ENSG00000149929 | 0.036157066 | 0.034015626 | 0.031244426 | 0.027579093 |
| ENSG00000105011 | 0.047265916 | 0.040652459 | 0.041307792 | 0.037055633 |
| ENSG00000040341 | 0.03756061  | 0.045717059 | 0.033711432 | 0.033213774 |
| ENSG00000147065 | 0.022212362 | 0.029819429 | 0.028357256 | 0.019984677 |
| ENSG00000017483 | 0.038047537 | 0.031472583 | 0.033544054 | 0.0368018   |
| ENSG00000101435 | 0.030084867 | 0.03545362  | 0.032517461 | 0.029596186 |
| ENSG00000116685 | 0.026665254 | 0.030976556 | 0.037130389 | 0.025205659 |
| ENSG00000152669 | 0.015595785 | 0.025009637 | 0.025480658 | 0.015438816 |

|                 |             |             |             |             |
|-----------------|-------------|-------------|-------------|-------------|
| ENSG00000148356 | 0.026797035 | 0.030528462 | 0.027757611 | 0.021653319 |
| ENSG00000196242 | 0.01557781  | 0.024601931 | 0.024907994 | 0.01540431  |
| ENSG00000143140 | 0.015009688 | 0.025497477 | 0.024651849 | 0.014858771 |
| ENSG00000173349 | 0.03031873  | 0.037489427 | 0.03496327  | 0.026008088 |
| ENSG00000108774 | 0.030737074 | 0.037270901 | 0.032523991 | 0.033757367 |
| ENSG00000179115 | 0.024133737 | 0.028249871 | 0.029379684 | 0.023766039 |
| ENSG00000065029 | 0.033524862 | 0.036771624 | 0.033765927 | 0.02870081  |
| ENSG00000131771 | 0.01542869  | 0.025105293 | 0.024261521 | 0.014022842 |
| ENSG00000179364 | 0.014959148 | 0.024703295 | 0.02452265  | 0.014197984 |
| ENSG00000106829 | 0.058269774 | 0.049958539 | 0.044467237 | 0.04916383  |
| ENSG00000140464 | 0.018575938 | 0.027125131 | 0.02569266  | 0.016287633 |
| ENSG00000172478 | 0.017489763 | 0.02660803  | 0.025536748 | 0.017377917 |
| ENSG00000103994 | 0.032941081 | 0.0382093   | 0.03195011  | 0.025039316 |
| ENSG00000105497 | 0.035740482 | 0.037903142 | 0.038312917 | 0.026198351 |
| ENSG00000140254 | 0.015196966 | 0.02502865  | 0.024118585 | 0.015782052 |
| ENSG00000178257 | 0.015600981 | 0.025730554 | 0.024631775 | 0.01630571  |
| ENSG00000084444 | 0.022591176 | 0.034787096 | 0.031012337 | 0.023639252 |
| ENSG00000181085 | 0.014958829 | 0.025887372 | 0.023879849 | 0.01450203  |
| ENSG00000174840 | 0.02349148  | 0.031433872 | 0.030706181 | 0.02539161  |
| ENSG00000142959 | 0.025878908 | 0.028912259 | 0.026861385 | 0.020435156 |
| ENSG00000141664 | 0.016343605 | 0.024972505 | 0.025533542 | 0.015235809 |
| ENSG00000187091 | 0.027711829 | 0.033020461 | 0.027211752 | 0.028773703 |
| ENSG00000241233 | 0.018467964 | 0.026172977 | 0.026347973 | 0.017763735 |
| ENSG00000197375 | 0.031346269 | 0.033177664 | 0.028897874 | 0.021667688 |
| ENSG00000171365 | 0.016927446 | 0.025978853 | 0.025170327 | 0.017223176 |
| ENSG00000163877 | 0.034638914 | 0.049901502 | 0.047850721 | 0.035768632 |
| ENSG00000125492 | 0.016068114 | 0.027585268 | 0.026197708 | 0.016197673 |
| ENSG00000181284 | 0.020146054 | 0.02789312  | 0.027948573 | 0.022978091 |
| ENSG00000183876 | 0.015320644 | 0.02553416  | 0.025417167 | 0.016120543 |
| ENSG00000187242 | 0.01504733  | 0.024562791 | 0.024962038 | 0.014862273 |
| ENSG00000095464 | 0.016467964 | 0.025731855 | 0.024529056 | 0.015603114 |
| ENSG00000157800 | 0.030303432 | 0.033954065 | 0.038848976 | 0.025733259 |
| ENSG00000204843 | 0.016276098 | 0.024533117 | 0.025397648 | 0.015487261 |
| ENSG00000099960 | 0.015130077 | 0.024730036 | 0.024633452 | 0.014858126 |
| ENSG00000082781 | 0.104252683 | 0.068265693 | 0.079068751 | 0.100903404 |
| ENSG00000159461 | 0.043990117 | 0.053460296 | 0.034716948 | 0.058066532 |
| ENSG00000061676 | 0.082766568 | 0.078732069 | 0.066343415 | 0.07525707  |
| ENSG00000103671 | 0.026802938 | 0.034045008 | 0.0334919   | 0.034443441 |
| ENSG00000139515 | 0.019560524 | 0.02699277  | 0.026352841 | 0.017248018 |
| ENSG00000131668 | 0.025287174 | 0.029524863 | 0.025468253 | 0.016985493 |
| ENSG00000161547 | 0.028364534 | 0.033318259 | 0.035623354 | 0.029322092 |
| ENSG00000162881 | 0.017242962 | 0.027498104 | 0.026287369 | 0.020348848 |
| ENSG00000080189 | 0.018926547 | 0.026123124 | 0.027047555 | 0.018962914 |
| ENSG00000080561 | 0.02128261  | 0.028269106 | 0.026739566 | 0.017801305 |
| ENSG00000107242 | 0.062784759 | 0.06976943  | 0.050163162 | 0.052285851 |
| ENSG00000110057 | 0.037504875 | 0.066327882 | 0.050844841 | 0.051723203 |
| ENSG00000151503 | 0.039264936 | 0.038047432 | 0.032565984 | 0.026078685 |
| ENSG00000013441 | 0.028937843 | 0.035108376 | 0.038281081 | 0.037704012 |
| ENSG00000176390 | 0.027346061 | 0.033649178 | 0.032466614 | 0.02608051  |
| ENSG00000137033 | 0.017665336 | 0.025405674 | 0.02454199  | 0.016535331 |
| ENSG00000065618 | 0.01923173  | 0.029362618 | 0.027283589 | 0.019200049 |
| ENSG00000132681 | 0.015904713 | 0.024779692 | 0.023870909 | 0.01465435  |
| ENSG00000143549 | 0.021758092 | 0.028876589 | 0.027562798 | 0.020546291 |
| ENSG0000008988  | 0.016122666 | 0.024129398 | 0.025164387 | 0.016598583 |

|                 |             |             |             |             |
|-----------------|-------------|-------------|-------------|-------------|
| ENSG00000104979 | 0.01798016  | 0.026868495 | 0.027707301 | 0.019881374 |
| ENSG00000184524 | 0.099194613 | 0.072488273 | 0.066978952 | 0.083425511 |
| ENSG00000148450 | 0.035327963 | 0.042306619 | 0.040063525 | 0.029419962 |
| ENSG00000160181 | 0.083832278 | 0.029486308 | 0.029071899 | 0.042965067 |
| ENSG00000212127 | 0.019061609 | 0.027136188 | 0.028511064 | 0.018969577 |
| ENSG00000197008 | 0.0395475   | 0.041901143 | 0.036438426 | 0.034191854 |
| ENSG00000086696 | 0.016470284 | 0.02552616  | 0.024696164 | 0.014807641 |
| ENSG00000160844 | 0.037618704 | 0.033420772 | 0.034079523 | 0.022771016 |
| ENSG00000116266 | 0.034695079 | 0.038654811 | 0.035040056 | 0.038655255 |
| ENSG00000148734 | 0.017777154 | 0.027541323 | 0.025232252 | 0.016927458 |
| ENSG00000123562 | 0.033611945 | 0.034559836 | 0.033593444 | 0.023486263 |
| ENSG00000179796 | 0.017273938 | 0.025880648 | 0.026660259 | 0.017052757 |
| ENSG00000090534 | 0.014547409 | 0.024679093 | 0.02419535  | 0.013851722 |
| ENSG00000101331 | 0.01553207  | 0.02425229  | 0.024391152 | 0.015631554 |
| ENSG00000075426 | 0.069544962 | 0.067973253 | 0.059149285 | 0.080543175 |
| ENSG00000112742 | 0.043090309 | 0.036929978 | 0.03553822  | 0.036715201 |
| ENSG00000127837 | 0.024489014 | 0.027850705 | 0.030925649 | 0.021332694 |
| ENSG00000018699 | 0.035727559 | 0.040324447 | 0.033103373 | 0.030106678 |
| ENSG00000162923 | 0.032198388 | 0.033785191 | 0.035292032 | 0.030992348 |
| ENSG00000103852 | 0.024144605 | 0.034704051 | 0.02700779  | 0.024497679 |
| ENSG00000116857 | 0.042294454 | 0.038529822 | 0.038935648 | 0.03141369  |
| ENSG00000156711 | 0.081259283 | 0.045199125 | 0.059389053 | 0.053334931 |
| ENSG00000196639 | 0.016459832 | 0.026801609 | 0.025996359 | 0.015888461 |
| ENSG00000115255 | 0.016969024 | 0.025422858 | 0.02615667  | 0.016086041 |
| ENSG00000058600 | 0.026441421 | 0.031842102 | 0.038658625 | 0.024700919 |
| ENSG00000117569 | 0.035317778 | 0.037144827 | 0.040008921 | 0.029951583 |
| ENSG00000115488 | 0.017394183 | 0.025265893 | 0.025557284 | 0.015378094 |
| ENSG00000127191 | 0.02175663  | 0.029258467 | 0.030017614 | 0.022352293 |
| ENSG00000122085 | 0.034091692 | 0.03583493  | 0.034980308 | 0.030831383 |
| ENSG00000099341 | 0.033320781 | 0.035242226 | 0.034759237 | 0.025946405 |
| ENSG00000164032 | 0.026846835 | 0.028904578 | 0.028100871 | 0.02092373  |
| ENSG00000144567 | 0.023017915 | 0.029968226 | 0.032359419 | 0.026132754 |
| ENSG00000065308 | 0.06822187  | 0.051427646 | 0.049430039 | 0.059652801 |
| ENSG00000012061 | 0.024722619 | 0.030144654 | 0.031459252 | 0.023598998 |
| ENSG00000114349 | 0.017276978 | 0.025866569 | 0.025000755 | 0.017864274 |
| ENSG00000176428 | 0.05209132  | 0.04721033  | 0.037862326 | 0.045701805 |
| ENSG00000205649 | 0.017211855 | 0.024910245 | 0.025401301 | 0.016324705 |
| ENSG00000099822 | 0.015210253 | 0.024939703 | 0.024795287 | 0.014593414 |
| ENSG00000114023 | 0.016349242 | 0.024810479 | 0.025150903 | 0.015033389 |
| ENSG00000127884 | 0.023055058 | 0.031159742 | 0.031703498 | 0.023451409 |
| ENSG00000041357 | 0.026216146 | 0.033048801 | 0.030378531 | 0.025995759 |
| ENSG00000136141 | 0.016343387 | 0.025085256 | 0.024401714 | 0.017089646 |
| ENSG00000196247 | 0.033255054 | 0.041434962 | 0.041372009 | 0.031668009 |
| ENSG00000152127 | 0.017974626 | 0.028401761 | 0.027600296 | 0.018936533 |
| ENSG00000107796 | 0.044748801 | 0.052354542 | 0.048926795 | 0.047791535 |
| ENSG00000136243 | 0.02807779  | 0.034043473 | 0.035218257 | 0.028838934 |
| ENSG00000169021 | 0.0192488   | 0.026289631 | 0.027935701 | 0.018605593 |
| ENSG00000142546 | 0.025983834 | 0.030155202 | 0.029733189 | 0.020820443 |
| ENSG00000169442 | 0.030991564 | 0.032852611 | 0.02671545  | 0.027804653 |
| ENSG00000129911 | 0.025738256 | 0.037579579 | 0.043521044 | 0.027631085 |
| ENSG00000124194 | 0.015348655 | 0.025758366 | 0.024162099 | 0.015241383 |
| ENSG00000146858 | 0.016808234 | 0.02633397  | 0.025124992 | 0.015539582 |
| ENSG00000196924 | 0.03312732  | 0.041919901 | 0.034008473 | 0.038390735 |
| ENSG00000120616 | 0.034521861 | 0.042948629 | 0.040406111 | 0.030214181 |

|                 |             |             |             |             |
|-----------------|-------------|-------------|-------------|-------------|
| ENSG00000117614 | 0.026220367 | 0.03247688  | 0.031620409 | 0.024388718 |
| ENSG00000186104 | 0.019267383 | 0.027817411 | 0.026909357 | 0.018738056 |
| ENSG00000180758 | 0.019098081 | 0.028050462 | 0.027109316 | 0.017745685 |
| ENSG00000175832 | 0.052262828 | 0.052188727 | 0.044000882 | 0.052386216 |
| ENSG00000158106 | 0.025162181 | 0.041436172 | 0.031797339 | 0.038322552 |
| ENSG00000124795 | 0.030977689 | 0.033148851 | 0.034829021 | 0.036345658 |
| ENSG00000177103 | 0.040004693 | 0.033777253 | 0.028893241 | 0.031107753 |
| ENSG00000143195 | 0.016301575 | 0.025255927 | 0.024095753 | 0.015869311 |
| ENSG00000161570 | 0.053425085 | 0.049632918 | 0.044309428 | 0.058903612 |
| ENSG00000172183 | 0.042190037 | 0.042879666 | 0.037191882 | 0.036568758 |
| ENSG00000156110 | 0.041157919 | 0.043201709 | 0.035908097 | 0.038266636 |
| ENSG00000241404 | 0.015202885 | 0.025274612 | 0.02443488  | 0.014444687 |
| ENSG00000221874 | 0.016875651 | 0.024343385 | 0.024615114 | 0.014344993 |
| ENSG00000147082 | 0.015590172 | 0.025797567 | 0.023990462 | 0.015814571 |
| ENSG00000177556 | 0.033300183 | 0.033107746 | 0.029398928 | 0.030917776 |
| ENSG00000100441 | 0.020701777 | 0.029990938 | 0.027138827 | 0.025718298 |
| ENSG00000103199 | 0.017256366 | 0.02517307  | 0.024961636 | 0.016796206 |
| ENSG00000111700 | 0.019167263 | 0.0259398   | 0.025873224 | 0.016634472 |
| ENSG00000205765 | 0.030960142 | 0.03292472  | 0.029136766 | 0.021890173 |
| ENSG00000156298 | 0.037335272 | 0.028487509 | 0.025024891 | 0.024861145 |
| ENSG00000066136 | 0.025302802 | 0.033096132 | 0.031521681 | 0.023631485 |
| ENSG00000160392 | 0.03435726  | 0.029893279 | 0.044990979 | 0.042622083 |
| ENSG00000167100 | 0.027486215 | 0.030572203 | 0.034330837 | 0.027992608 |
| ENSG00000108106 | 0.041046743 | 0.031525293 | 0.042666247 | 0.037810725 |
| ENSG00000176371 | 0.021541326 | 0.027179591 | 0.027433324 | 0.019617902 |
| ENSG00000004766 | 0.024144513 | 0.031468467 | 0.02702184  | 0.023217454 |
| ENSG00000205426 | 0.016320918 | 0.024694929 | 0.025171765 | 0.014931303 |
| ENSG00000008323 | 0.041378433 | 0.034374266 | 0.02895613  | 0.031211914 |
| ENSG00000197063 | 0.035798303 | 0.043295427 | 0.03675055  | 0.033555067 |
| ENSG00000078699 | 0.032204921 | 0.037912821 | 0.029920333 | 0.032478301 |
| ENSG00000151422 | 0.031645387 | 0.036411132 | 0.031951513 | 0.025792628 |
| ENSG00000122133 | 0.01764408  | 0.027854143 | 0.025137743 | 0.023981942 |
| ENSG00000115844 | 0.049558412 | 0.040668021 | 0.042940694 | 0.046458767 |
| ENSG00000160216 | 0.038774724 | 0.042361952 | 0.036578623 | 0.042330269 |
| ENSG00000198146 | 0.015649489 | 0.026815794 | 0.025922663 | 0.016802684 |
| ENSG00000170965 | 0.019057292 | 0.02754042  | 0.025990057 | 0.02307926  |
| ENSG00000125618 | 0.017265414 | 0.026915535 | 0.026035889 | 0.01661758  |
| ENSG00000144535 | 0.021563135 | 0.028176057 | 0.027412481 | 0.021050718 |
| ENSG00000139531 | 0.020518468 | 0.028363855 | 0.029365364 | 0.020350719 |
| ENSG00000071575 | 0.073297433 | 0.045222877 | 0.064315228 | 0.069152016 |
| ENSG00000109805 | 0.04104086  | 0.036155855 | 0.036740408 | 0.033695022 |
| ENSG00000114770 | 0.03179579  | 0.034270629 | 0.032589664 | 0.024851013 |
| ENSG00000168685 | 0.038779169 | 0.038391424 | 0.030538725 | 0.022265948 |
| ENSG00000166181 | 0.023090081 | 0.032251103 | 0.028535872 | 0.021082343 |
| ENSG00000104321 | 0.016810886 | 0.025729285 | 0.025073113 | 0.016628937 |
| ENSG00000120594 | 0.121694802 | 0.071958066 | 0.043596887 | 0.078322241 |
| ENSG00000196878 | 0.07765909  | 0.060342583 | 0.052918003 | 0.05745339  |
| ENSG00000160714 | 0.030477251 | 0.038668979 | 0.037036532 | 0.033776946 |
| ENSG00000124160 | 0.034348878 | 0.033057929 | 0.035611041 | 0.034019234 |
| ENSG00000129055 | 0.044446188 | 0.051812924 | 0.044281958 | 0.073169276 |
| ENSG00000181963 | 0.015375816 | 0.025957443 | 0.025575902 | 0.01483925  |
| ENSG00000198216 | 0.017340147 | 0.025788889 | 0.024358634 | 0.01738791  |
| ENSG00000197323 | 0.016250102 | 0.025382847 | 0.026419872 | 0.015987318 |
| ENSG00000141452 | 0.029324024 | 0.033919298 | 0.031420061 | 0.025321533 |



|                 |             |             |             |             |
|-----------------|-------------|-------------|-------------|-------------|
| ENSG00000250361 | 0.016439639 | 0.025132925 | 0.024966754 | 0.015827429 |
| ENSG00000171790 | 0.016677604 | 0.024900159 | 0.024303967 | 0.015114195 |
| ENSG00000124659 | 0.026311272 | 0.033060794 | 0.033053017 | 0.021399436 |
| ENSG00000169509 | 0.015126616 | 0.024493086 | 0.024637161 | 0.015527144 |
| ENSG00000117118 | 0.024807725 | 0.030809171 | 0.027305615 | 0.020691176 |
| ENSG00000124839 | 0.016843584 | 0.025314377 | 0.025262616 | 0.015470702 |
| ENSG00000168081 | 0.046920964 | 0.038527065 | 0.034701664 | 0.03970935  |
| ENSG00000076924 | 0.028803636 | 0.02952063  | 0.034215359 | 0.027357682 |
| ENSG00000115866 | 0.02922995  | 0.030660692 | 0.027708429 | 0.020873967 |
| ENSG00000090565 | 0.028788118 | 0.03666448  | 0.038107913 | 0.023121959 |
| ENSG00000186416 | 0.02406838  | 0.031295219 | 0.030763227 | 0.021249686 |
| ENSG00000100593 | 0.016808462 | 0.027362654 | 0.025158281 | 0.01842167  |
| ENSG00000167555 | 0.025875655 | 0.028172773 | 0.028158129 | 0.02011621  |
| ENSG00000013275 | 0.026775618 | 0.031064962 | 0.030138209 | 0.030309756 |
| ENSG00000162241 | 0.043249267 | 0.038230309 | 0.034312846 | 0.038224913 |
| ENSG00000177169 | 0.036539135 | 0.039099226 | 0.0398047   | 0.034798011 |
| ENSG00000182612 | 0.021839965 | 0.029326651 | 0.028098963 | 0.027160055 |
| ENSG00000139083 | 0.029190235 | 0.036508273 | 0.032538974 | 0.038752008 |
| ENSG00000121281 | 0.038209021 | 0.042748328 | 0.039029303 | 0.029396212 |
| ENSG00000164007 | 0.015660701 | 0.026935822 | 0.024998228 | 0.015803192 |
| ENSG00000129048 | 0.017820002 | 0.026513347 | 0.025836908 | 0.018776526 |
| ENSG00000111328 | 0.032955073 | 0.033888329 | 0.027965343 | 0.035783622 |
| ENSG00000163263 | 0.013725373 | 0.024013036 | 0.02422063  | 0.013720633 |
| ENSG00000102158 | 0.028699362 | 0.03246445  | 0.033565017 | 0.027394867 |
| ENSG00000171942 | 0.014991004 | 0.025143268 | 0.024732823 | 0.015002505 |
| ENSG00000105552 | 0.025630804 | 0.027920608 | 0.029712189 | 0.023874924 |
| ENSG00000068650 | 0.03269478  | 0.028024712 | 0.027545423 | 0.025742263 |
| ENSG00000206262 | 0.014874758 | 0.023838076 | 0.0247229   | 0.013903233 |
| ENSG00000150316 | 0.026609947 | 0.03109339  | 0.030098525 | 0.020641196 |
| ENSG00000172602 | 0.031085312 | 0.031179606 | 0.034380852 | 0.032554121 |
| ENSG00000012660 | 0.032017827 | 0.036280165 | 0.031810151 | 0.024447122 |
| ENSG00000072310 | 0.051254684 | 0.038402967 | 0.043227793 | 0.035445526 |
| ENSG00000173698 | 0.053551784 | 0.028264278 | 0.025732658 | 0.021389073 |
| ENSG00000169446 | 0.022664353 | 0.028602917 | 0.03143625  | 0.02289938  |
| ENSG00000151366 | 0.033619318 | 0.033114492 | 0.035022351 | 0.037091238 |
| ENSG00000182218 | 0.015509007 | 0.026458557 | 0.024865926 | 0.015284669 |
| ENSG00000102901 | 0.022498653 | 0.03113291  | 0.030595661 | 0.021802344 |
| ENSG00000148700 | 0.056897784 | 0.04502997  | 0.04289536  | 0.038418196 |
| ENSG00000172197 | 0.035808209 | 0.033914737 | 0.036357144 | 0.028536864 |
| ENSG00000141200 | 0.016636949 | 0.024947505 | 0.025220225 | 0.016934413 |
| ENSG00000213281 | 0.030724474 | 0.035261703 | 0.039726817 | 0.034882024 |
| ENSG00000136490 | 0.029565439 | 0.028276786 | 0.029462312 | 0.025437178 |
| ENSG00000178602 | 0.017386725 | 0.024241857 | 0.024906057 | 0.016290943 |
| ENSG00000233822 | 0.018916734 | 0.026862342 | 0.026343803 | 0.017045479 |
| ENSG00000148110 | 0.044387022 | 0.062732182 | 0.04752766  | 0.107305569 |
| ENSG00000241258 | 0.022334924 | 0.027396414 | 0.028873681 | 0.02173572  |
| ENSG00000004799 | 0.015850267 | 0.025563955 | 0.025459847 | 0.01637481  |
| ENSG00000157259 | 0.027016481 | 0.03357057  | 0.032531231 | 0.025829832 |
| ENSG00000105287 | 0.029898328 | 0.029569387 | 0.036776122 | 0.024699147 |
| ENSG00000169885 | 0.016096826 | 0.024588551 | 0.024291563 | 0.014448103 |
| ENSG00000157540 | 0.027880573 | 0.033761174 | 0.035712414 | 0.028952538 |
| ENSG00000125257 | 0.041046175 | 0.045587819 | 0.039692641 | 0.041296249 |
| ENSG00000178171 | 0.015877607 | 0.024853068 | 0.024729523 | 0.014538716 |
| ENSG00000112214 | 0.015777992 | 0.024800505 | 0.025174964 | 0.015295856 |

|                 |             |             |             |             |
|-----------------|-------------|-------------|-------------|-------------|
| ENSG00000186977 | 0.018208182 | 0.02549086  | 0.027126658 | 0.016831594 |
| ENSG00000155329 | 0.030941055 | 0.038257558 | 0.037856349 | 0.030147962 |
| ENSG00000180066 | 0.020174373 | 0.032324185 | 0.025923566 | 0.017568512 |
| ENSG00000188784 | 0.015357684 | 0.026201306 | 0.024843742 | 0.014927849 |
| ENSG00000074935 | 0.042593252 | 0.045286599 | 0.036852881 | 0.038290214 |
| ENSG00000160563 | 0.028631091 | 0.035198917 | 0.035239827 | 0.030351729 |
| ENSG00000010256 | 0.025924061 | 0.028837874 | 0.027402993 | 0.021049077 |
| ENSG00000102580 | 0.043472997 | 0.040939407 | 0.056287946 | 0.04593887  |
| ENSG00000060069 | 0.032724006 | 0.039438444 | 0.037917289 | 0.031584864 |
| ENSG00000197125 | 0.017478899 | 0.026284972 | 0.025752912 | 0.016958192 |
| ENSG00000206026 | 0.017028467 | 0.025132469 | 0.025518365 | 0.015885072 |
| ENSG00000171501 | 0.015926497 | 0.025940701 | 0.024133708 | 0.015863312 |
| ENSG00000133321 | 0.04965819  | 0.052840466 | 0.043316179 | 0.047966254 |
| ENSG00000184750 | 0.015909622 | 0.023972302 | 0.024187729 | 0.015332488 |
| ENSG00000101844 | 0.031587019 | 0.037735685 | 0.032828283 | 0.029474566 |
| ENSG00000068001 | 0.017544593 | 0.027196436 | 0.027310158 | 0.018467378 |
| ENSG00000091317 | 0.037797262 | 0.045620852 | 0.039262204 | 0.045115295 |
| ENSG00000025156 | 0.029484099 | 0.03301761  | 0.031891165 | 0.025003116 |
| ENSG00000163012 | 0.01585571  | 0.025947977 | 0.025872593 | 0.01515838  |
| ENSG00000155428 | 0.037601145 | 0.0375138   | 0.039316661 | 0.038959253 |
| ENSG00000100077 | 0.03517225  | 0.035356474 | 0.038265407 | 0.031674506 |
| ENSG00000113088 | 0.024625713 | 0.031938294 | 0.032080325 | 0.036759971 |
| ENSG00000103061 | 0.022295066 | 0.028523411 | 0.029226572 | 0.022471951 |
| ENSG00000205022 | 0.015609733 | 0.024202527 | 0.024194284 | 0.013579206 |
| ENSG00000084072 | 0.049661641 | 0.044521475 | 0.037533834 | 0.040228898 |
| ENSG00000215560 | 0.017388765 | 0.025919045 | 0.026112732 | 0.016378278 |
| ENSG00000157343 | 0.023176705 | 0.027239115 | 0.026031287 | 0.017376315 |
| ENSG00000142615 | 0.017212032 | 0.025501208 | 0.025554537 | 0.016166541 |
| ENSG00000112852 | 0.017284764 | 0.025984343 | 0.024303378 | 0.01439481  |
| ENSG00000186212 | 0.016646175 | 0.025157125 | 0.026394633 | 0.015654733 |
| ENSG00000113889 | 0.019394071 | 0.025641046 | 0.025564292 | 0.017764186 |
| ENSG00000181935 | 0.015632976 | 0.024860501 | 0.024322891 | 0.015135587 |
| ENSG00000068078 | 0.025354756 | 0.027042335 | 0.026829047 | 0.019491393 |
| ENSG00000151576 | 0.023105197 | 0.025770558 | 0.028750261 | 0.020333317 |
| ENSG00000177303 | 0.017728201 | 0.027698731 | 0.025619075 | 0.018324141 |
| ENSG00000110237 | 0.056885178 | 0.058586902 | 0.053254265 | 0.070514552 |
| ENSG00000175711 | 0.022654122 | 0.030576847 | 0.030413899 | 0.022140619 |
| ENSG00000158764 | 0.01632577  | 0.025652694 | 0.02416449  | 0.015920762 |
| ENSG00000127870 | 0.017666349 | 0.026218513 | 0.025996507 | 0.017159085 |
| ENSG00000205323 | 0.019221635 | 0.028137008 | 0.028226635 | 0.017112871 |
| ENSG00000152291 | 0.020903202 | 0.027381382 | 0.030037198 | 0.024806555 |
| ENSG00000175592 | 0.018151065 | 0.027036433 | 0.025425134 | 0.01862935  |
| ENSG00000115145 | 0.037898253 | 0.037545473 | 0.032987054 | 0.042426949 |
| ENSG00000166912 | 0.014072096 | 0.024406843 | 0.024862923 | 0.014767982 |
| ENSG00000136560 | 0.054506437 | 0.045616284 | 0.055232829 | 0.055392434 |
| ENSG00000164134 | 0.034566432 | 0.035559842 | 0.032121317 | 0.02982457  |
| ENSG00000177646 | 0.03574871  | 0.035649562 | 0.032723928 | 0.029467933 |
| ENSG00000174231 | 0.022261657 | 0.029936697 | 0.029707666 | 0.019922608 |
| ENSG00000150045 | 0.051286497 | 0.045802677 | 0.035077457 | 0.039149114 |
| ENSG00000073792 | 0.040107285 | 0.02717032  | 0.026162878 | 0.020453071 |
| ENSG00000184956 | 0.018477607 | 0.025598261 | 0.026839325 | 0.015963384 |
| ENSG00000033170 | 0.041591938 | 0.039625244 | 0.046444015 | 0.045924009 |
| ENSG00000181315 | 0.030101204 | 0.037653612 | 0.034483952 | 0.03125591  |
| ENSG00000163755 | 0.017548956 | 0.025738925 | 0.027608056 | 0.018172604 |

|                 |             |             |             |             |
|-----------------|-------------|-------------|-------------|-------------|
| ENSG00000109762 | 0.032621987 | 0.042064724 | 0.032632711 | 0.034679448 |
| ENSG00000198590 | 0.015983098 | 0.026646522 | 0.025284059 | 0.015750015 |
| ENSG00000108960 | 0.038074862 | 0.041424    | 0.036057786 | 0.034857737 |
| ENSG00000132434 | 0.055018571 | 0.045893534 | 0.053963917 | 0.056013806 |
| ENSG00000136731 | 0.04624348  | 0.041038141 | 0.044809942 | 0.039170882 |
| ENSG00000105549 | 0.016366019 | 0.024892546 | 0.02432072  | 0.016080927 |
| ENSG00000148444 | 0.027808868 | 0.032084254 | 0.030499368 | 0.0218084   |
| ENSG00000165480 | 0.045503967 | 0.04671728  | 0.036161234 | 0.036514534 |
| ENSG00000175606 | 0.057164115 | 0.04905953  | 0.046028161 | 0.053868629 |
| ENSG00000157954 | 0.015655696 | 0.025787245 | 0.02482755  | 0.015514472 |
| ENSG00000162236 | 0.025698729 | 0.030500321 | 0.043619408 | 0.023878978 |
| ENSG00000114796 | 0.040138593 | 0.043802918 | 0.046714807 | 0.042957055 |
| ENSG00000113597 | 0.031046266 | 0.031152982 | 0.031678756 | 0.028056434 |
| ENSG00000149970 | 0.015890216 | 0.025874195 | 0.025006281 | 0.016093365 |
| ENSG00000127472 | 0.015524566 | 0.024934118 | 0.025653413 | 0.016224371 |
| ENSG00000137757 | 0.021577739 | 0.027617626 | 0.033848103 | 0.018869155 |
| ENSG00000136689 | 0.017644121 | 0.025598402 | 0.026325149 | 0.01755491  |
| ENSG00000188486 | 0.04222295  | 0.040154823 | 0.04080108  | 0.035504115 |
| ENSG00000073756 | 0.052883442 | 0.030768923 | 0.029908851 | 0.024294509 |
| ENSG00000154589 | 0.033025335 | 0.040806641 | 0.034832213 | 0.02833643  |
| ENSG00000152229 | 0.101227012 | 0.071140005 | 0.05828755  | 0.068098812 |
| ENSG00000179837 | 0.033264856 | 0.0316088   | 0.031810268 | 0.029522428 |
| ENSG00000165970 | 0.018948213 | 0.025333137 | 0.025577458 | 0.015483628 |
| ENSG00000176463 | 0.017588478 | 0.025964512 | 0.02555551  | 0.018629224 |
| ENSG00000185479 | 0.017131845 | 0.024645976 | 0.026864372 | 0.017165196 |
| ENSG00000204316 | 0.025980336 | 0.026789777 | 0.030431733 | 0.027177258 |
| ENSG00000143224 | 0.034409637 | 0.039909403 | 0.029996366 | 0.02655289  |
| ENSG00000232119 | 0.025736966 | 0.029612128 | 0.028307398 | 0.018997253 |
| ENSG00000175874 | 0.016717369 | 0.025185868 | 0.02469906  | 0.016879388 |
| ENSG00000029364 | 0.048379446 | 0.051128192 | 0.042549833 | 0.031582823 |
| ENSG00000198862 | 0.029194373 | 0.037334935 | 0.031540628 | 0.029201311 |
| ENSG00000005075 | 0.027776985 | 0.036367629 | 0.03092659  | 0.023892187 |
| ENSG00000158483 | 0.01751387  | 0.026581565 | 0.026617995 | 0.019713639 |
| ENSG00000132600 | 0.032732347 | 0.033845903 | 0.035218764 | 0.027067317 |
| ENSG00000214087 | 0.038448339 | 0.033489875 | 0.038862284 | 0.034703543 |
| ENSG00000004059 | 0.024591947 | 0.032429551 | 0.030052064 | 0.025062703 |
| ENSG00000162817 | 0.126407906 | 0.112239004 | 0.118611515 | 0.122101147 |
| ENSG00000106305 | 0.032409387 | 0.033456598 | 0.032609585 | 0.033879541 |
| ENSG00000039523 | 0.031668837 | 0.03809457  | 0.038895295 | 0.045128603 |
| ENSG00000149925 | 0.026538437 | 0.035969121 | 0.030668676 | 0.029239882 |
| ENSG00000137770 | 0.031616658 | 0.035855808 | 0.033327422 | 0.031963642 |
| ENSG00000149187 | 0.036618742 | 0.041591745 | 0.03558688  | 0.024715984 |
| ENSG00000183723 | 0.015475104 | 0.024565451 | 0.024856567 | 0.015420191 |
| ENSG00000109472 | 0.015848351 | 0.024733732 | 0.025142137 | 0.015116476 |
| ENSG00000185379 | 0.029589251 | 0.038635066 | 0.031392723 | 0.026023913 |
| ENSG00000183690 | 0.017128227 | 0.027642203 | 0.026218731 | 0.032928965 |
| ENSG00000130813 | 0.032375527 | 0.038669463 | 0.033497168 | 0.02818388  |
| ENSG00000187753 | 0.018132859 | 0.025785297 | 0.029489772 | 0.018662059 |
| ENSG00000169397 | 0.017130826 | 0.024938464 | 0.026105351 | 0.016890989 |
| ENSG00000135702 | 0.014818513 | 0.024828493 | 0.025050348 | 0.015832172 |
| ENSG00000087494 | 0.016273148 | 0.025738856 | 0.024527175 | 0.01537834  |
| ENSG00000137936 | 0.093433893 | 0.085832383 | 0.094328284 | 0.114705023 |
| ENSG00000168421 | 0.031955447 | 0.037435425 | 0.034249314 | 0.026462015 |
| ENSG00000139726 | 0.023707914 | 0.032843918 | 0.029249609 | 0.025201755 |

|                 |             |             |             |             |
|-----------------|-------------|-------------|-------------|-------------|
| ENSG00000147246 | 0.016074644 | 0.025498936 | 0.025420789 | 0.014899184 |
| ENSG00000054148 | 0.023169024 | 0.028376627 | 0.028000485 | 0.021371241 |
| ENSG00000157184 | 0.020984227 | 0.027472682 | 0.037164419 | 0.028239598 |
| ENSG00000166130 | 0.015572697 | 0.025801711 | 0.024430605 | 0.015945704 |
| ENSG00000005007 | 0.028421828 | 0.030880519 | 0.037406735 | 0.02725749  |
| ENSG00000124493 | 0.015602005 | 0.026156611 | 0.025735533 | 0.016834477 |
| ENSG00000121316 | 0.066900445 | 0.054302788 | 0.069269791 | 0.078775499 |
| ENSG00000213625 | 0.035948797 | 0.034193958 | 0.030641975 | 0.026770436 |
| ENSG00000072818 | 0.031709665 | 0.029369742 | 0.031548392 | 0.028181155 |
| ENSG00000128487 | 0.043524488 | 0.037358283 | 0.037827499 | 0.032050997 |
| ENSG00000117114 | 0.037570013 | 0.025810582 | 0.024993406 | 0.017246512 |
| ENSG00000179588 | 0.029663402 | 0.030844401 | 0.03686632  | 0.026935973 |
| ENSG00000155093 | 0.072404613 | 0.05921292  | 0.057656508 | 0.065362834 |
| ENSG00000083642 | 0.035306306 | 0.035397406 | 0.033564044 | 0.028547641 |
| ENSG00000177938 | 0.016161353 | 0.024907797 | 0.025111835 | 0.015265977 |
| ENSG00000160584 | 0.037092016 | 0.036839541 | 0.037288865 | 0.038430726 |
| ENSG00000135049 | 0.024857202 | 0.028863263 | 0.031931913 | 0.02636569  |
| ENSG00000122034 | 0.028622931 | 0.032418009 | 0.029003872 | 0.024564953 |
| ENSG00000137200 | 0.02144803  | 0.029194833 | 0.028764514 | 0.018789382 |
| ENSG00000100427 | 0.017165013 | 0.024787973 | 0.02614523  | 0.015680931 |
| ENSG00000189134 | 0.023221086 | 0.028489039 | 0.027502993 | 0.021015492 |
| ENSG00000196503 | 0.017402906 | 0.030330584 | 0.028407888 | 0.015672786 |
| ENSG00000051620 | 0.055681028 | 0.076513795 | 0.073454974 | 0.135468504 |
| ENSG00000065615 | 0.031619934 | 0.038871206 | 0.033725708 | 0.028774986 |
| ENSG00000161692 | 0.022760225 | 0.02730784  | 0.0280537   | 0.0194358   |
| ENSG00000109771 | 0.015415899 | 0.024123646 | 0.025531607 | 0.015479885 |
| ENSG00000162409 | 0.015057605 | 0.025342718 | 0.02568512  | 0.015029967 |
| ENSG00000164252 | 0.032501451 | 0.044555044 | 0.030703715 | 0.027744962 |
| ENSG00000174738 | 0.030599346 | 0.036345089 | 0.034966827 | 0.031010173 |
| ENSG00000163535 | 0.021174977 | 0.030809381 | 0.026947132 | 0.017253494 |
| ENSG00000104941 | 0.034458448 | 0.033520039 | 0.035833376 | 0.040541017 |
| ENSG00000174871 | 0.040570403 | 0.038181218 | 0.039936058 | 0.033776954 |
| ENSG00000159961 | 0.017644949 | 0.02592487  | 0.026290895 | 0.019858206 |
| ENSG00000188517 | 0.018366307 | 0.026105616 | 0.025607937 | 0.017731245 |
| ENSG00000213928 | 0.025186065 | 0.031218152 | 0.029936032 | 0.021084037 |
| ENSG00000178038 | 0.017344972 | 0.025228147 | 0.026009435 | 0.016774641 |
| ENSG00000137869 | 0.016241546 | 0.026280009 | 0.024899296 | 0.015456657 |
| ENSG00000117597 | 0.027179171 | 0.030022012 | 0.028338375 | 0.020990881 |
| ENSG00000157224 | 0.042859861 | 0.039777287 | 0.040334252 | 0.036015101 |
| ENSG00000121351 | 0.016577221 | 0.025234214 | 0.02478572  | 0.01543501  |
| ENSG00000197838 | 0.015246019 | 0.02477436  | 0.024990356 | 0.014977771 |
| ENSG00000042493 | 0.070757062 | 0.061698002 | 0.055781541 | 0.070767448 |
| ENSG00000134086 | 0.034300714 | 0.034936282 | 0.034120421 | 0.030050927 |
| ENSG00000205678 | 0.015941284 | 0.026151695 | 0.026081607 | 0.016502432 |
| ENSG00000099800 | 0.033787304 | 0.03954925  | 0.040387455 | 0.035619173 |
| ENSG00000152348 | 0.023240684 | 0.028039626 | 0.027661143 | 0.024167602 |
| ENSG00000137440 | 0.02147663  | 0.024828505 | 0.025266004 | 0.015143922 |
| ENSG00000141580 | 0.032764427 | 0.037572437 | 0.035599979 | 0.034375632 |
| ENSG00000111885 | 0.060018408 | 0.049823861 | 0.046153541 | 0.048247789 |
| ENSG00000130363 | 0.032343317 | 0.039451511 | 0.033126643 | 0.026610015 |
| ENSG00000206013 | 0.013477379 | 0.023768372 | 0.023495009 | 0.013146153 |
| ENSG00000132142 | 0.017186946 | 0.026402678 | 0.025792545 | 0.017399239 |
| ENSG00000112406 | 0.051018933 | 0.04722956  | 0.048578104 | 0.045293859 |
| ENSG00000186868 | 0.016816635 | 0.025348041 | 0.026379277 | 0.015826731 |

|                 |             |             |             |             |
|-----------------|-------------|-------------|-------------|-------------|
| ENSG00000102743 | 0.047452548 | 0.040429782 | 0.037583094 | 0.038027252 |
| ENSG00000131469 | 0.015078922 | 0.024316674 | 0.024714438 | 0.015470162 |
| ENSG00000138136 | 0.018875054 | 0.026017143 | 0.025558589 | 0.018444911 |
| ENSG00000139343 | 0.023129609 | 0.027757173 | 0.02791482  | 0.018620348 |
| ENSG00000152192 | 0.037117093 | 0.030987658 | 0.029446934 | 0.028801894 |
| ENSG00000135597 | 0.030313851 | 0.032268451 | 0.03574117  | 0.029461317 |
| ENSG00000067533 | 0.035107851 | 0.037678532 | 0.040445113 | 0.040900357 |
| ENSG00000140688 | 0.028559344 | 0.032240615 | 0.031380301 | 0.025961486 |
| ENSG00000163705 | 0.01656313  | 0.025047422 | 0.025845486 | 0.016788919 |
| ENSG00000183580 | 0.019323955 | 0.025413804 | 0.024553164 | 0.015239725 |
| ENSG00000158488 | 0.013371238 | 0.023792743 | 0.02401923  | 0.014275723 |
| ENSG00000117481 | 0.032045119 | 0.030319941 | 0.030686652 | 0.027422752 |
| ENSG00000168517 | 0.035115325 | 0.043020004 | 0.036759183 | 0.033178656 |
| ENSG00000083828 | 0.027227532 | 0.034301967 | 0.035993481 | 0.023239663 |
| ENSG00000126602 | 0.031384523 | 0.030388966 | 0.031838278 | 0.025983967 |
| ENSG00000185499 | 0.020231056 | 0.030122604 | 0.030138731 | 0.02577398  |
| ENSG00000170425 | 0.051809608 | 0.034983126 | 0.026953577 | 0.037765343 |
| ENSG00000153132 | 0.072282541 | 0.037325675 | 0.026681713 | 0.023544066 |
| ENSG00000120526 | 0.044390011 | 0.051534919 | 0.038076202 | 0.039982837 |
| ENSG00000010932 | 0.014109828 | 0.025082037 | 0.024777361 | 0.014800333 |
| ENSG00000092607 | 0.14169471  | 0.107919369 | 0.085438383 | 0.107393979 |
| ENSG00000065060 | 0.016893303 | 0.025384997 | 0.025157826 | 0.016704576 |
| ENSG00000102554 | 0.064286672 | 0.037899978 | 0.033924012 | 0.040372546 |
| ENSG00000166261 | 0.01552373  | 0.02437804  | 0.024826473 | 0.01504438  |
| ENSG00000205060 | 0.029797397 | 0.034846202 | 0.035246358 | 0.033058567 |
| ENSG00000166479 | 0.039421779 | 0.040866104 | 0.034371894 | 0.025498652 |
| ENSG00000149742 | 0.01988762  | 0.025699579 | 0.0262255   | 0.015672578 |
| ENSG00000115446 | 0.026249557 | 0.032308051 | 0.032540049 | 0.022993865 |
| ENSG00000101421 | 0.022852259 | 0.032218705 | 0.032474457 | 0.022983009 |
| ENSG00000091542 | 0.042809003 | 0.033832012 | 0.03838289  | 0.034656034 |
| ENSG00000127989 | 0.03836799  | 0.038916494 | 0.044059961 | 0.033330143 |
| ENSG00000197506 | 0.015324941 | 0.024821741 | 0.025020334 | 0.0159598   |
| ENSG00000183421 | 0.074207404 | 0.045626212 | 0.044226972 | 0.052965152 |
| ENSG00000171989 | 0.017107253 | 0.024660756 | 0.023824658 | 0.015532186 |
| ENSG00000157303 | 0.051872277 | 0.038496832 | 0.041058932 | 0.042401475 |
| ENSG00000130684 | 0.032051914 | 0.036254118 | 0.035805759 | 0.035769293 |
| ENSG00000187134 | 0.088295252 | 0.038215447 | 0.025218468 | 0.033464444 |
| ENSG00000197019 | 0.037318825 | 0.042355637 | 0.055283111 | 0.032044665 |
| ENSG00000134242 | 0.016329406 | 0.024708537 | 0.024957726 | 0.017564607 |
| ENSG00000116560 | 0.035293039 | 0.040102269 | 0.041852565 | 0.042884968 |
| ENSG00000142192 | 0.134567762 | 0.077814181 | 0.074680601 | 0.092732093 |
| ENSG00000168476 | 0.038742632 | 0.030968    | 0.037568547 | 0.028111216 |
| ENSG00000204624 | 0.023843675 | 0.024989136 | 0.024860304 | 0.019528351 |
| ENSG00000068784 | 0.039794717 | 0.039921824 | 0.031100887 | 0.029146175 |
| ENSG00000106868 | 0.049358127 | 0.045607299 | 0.054053463 | 0.051691401 |
| ENSG00000147606 | 0.01934912  | 0.02500592  | 0.025619694 | 0.021555543 |
| ENSG00000187838 | 0.033300907 | 0.036808889 | 0.032671984 | 0.029223169 |
| ENSG00000141456 | 0.027841996 | 0.027863819 | 0.035121791 | 0.027598078 |
| ENSG00000197928 | 0.017055532 | 0.02667467  | 0.026104167 | 0.016034621 |
| ENSG00000159224 | 0.016035396 | 0.024766334 | 0.024521312 | 0.014627512 |
| ENSG00000114200 | 0.120982889 | 0.089605868 | 0.029626565 | 0.02689986  |
| ENSG00000196090 | 0.015678488 | 0.025241778 | 0.024472619 | 0.016786054 |
| ENSG00000196502 | 0.016855006 | 0.026119974 | 0.025099656 | 0.022128401 |
| ENSG00000147231 | 0.062643111 | 0.053053995 | 0.042183807 | 0.041515848 |

|                 |             |             |             |             |
|-----------------|-------------|-------------|-------------|-------------|
| ENSG00000133874 | 0.043730618 | 0.038234858 | 0.043688919 | 0.036707387 |
| ENSG00000185896 | 0.029418149 | 0.034564232 | 0.032128702 | 0.030080222 |
| ENSG00000143776 | 0.026870303 | 0.029467948 | 0.02689546  | 0.022525174 |
| ENSG00000146374 | 0.015503007 | 0.025369568 | 0.02481034  | 0.014913953 |
| ENSG00000115750 | 0.042113644 | 0.039911275 | 0.040967714 | 0.036968067 |
| ENSG00000143603 | 0.082203519 | 0.07658081  | 0.063747966 | 0.055969696 |
| ENSG00000177479 | 0.028765491 | 0.032884386 | 0.033767997 | 0.027119344 |
| ENSG00000119977 | 0.030554528 | 0.033972321 | 0.035970962 | 0.027203686 |
| ENSG00000022556 | 0.171478017 | 0.145839275 | 0.142843609 | 0.135590104 |
| ENSG00000184117 | 0.028371656 | 0.029720106 | 0.034391799 | 0.032845973 |
| ENSG00000115363 | 0.01551645  | 0.025315475 | 0.024159679 | 0.015240679 |
| ENSG00000100105 | 0.035476177 | 0.036467283 | 0.037713406 | 0.040816152 |
| ENSG00000175984 | 0.016914081 | 0.025252063 | 0.02471537  | 0.015644605 |
| ENSG00000186377 | 0.01625746  | 0.025226314 | 0.02487708  | 0.014719019 |
| ENSG00000155827 | 0.034448823 | 0.037851961 | 0.032855815 | 0.025304975 |
| ENSG00000111728 | 0.014649976 | 0.024399436 | 0.024633191 | 0.02681669  |
| ENSG00000184672 | 0.015154557 | 0.024851162 | 0.025718841 | 0.013703952 |
| ENSG00000244025 | 0.017865793 | 0.02648054  | 0.025623517 | 0.015076406 |
| ENSG00000104325 | 0.02573888  | 0.031395934 | 0.029366781 | 0.019997662 |
| ENSG00000158089 | 0.091417194 | 0.044016368 | 0.044931527 | 0.084721818 |
| ENSG00000168434 | 0.018424612 | 0.027342561 | 0.02830848  | 0.01655756  |
| ENSG00000114646 | 0.016130545 | 0.025327944 | 0.024293971 | 0.015729789 |
| ENSG00000116016 | 0.016003968 | 0.02462852  | 0.024408478 | 0.014195242 |
| ENSG00000144893 | 0.016348644 | 0.025081275 | 0.024516885 | 0.015987903 |
| ENSG00000103599 | 0.016851331 | 0.025517109 | 0.024692535 | 0.015641693 |
| ENSG00000175538 | 0.020010576 | 0.025753889 | 0.024127356 | 0.014650994 |
| ENSG00000156304 | 0.027428881 | 0.032478801 | 0.035331853 | 0.028691401 |
| ENSG00000173402 | 0.02578237  | 0.034472881 | 0.033885973 | 0.02500267  |
| ENSG00000116903 | 0.03544268  | 0.038649788 | 0.039127737 | 0.038912768 |
| ENSG00000198353 | 0.018416307 | 0.025544687 | 0.02560997  | 0.017365343 |
| ENSG00000029725 | 0.040713663 | 0.030366325 | 0.032746872 | 0.028475261 |
| ENSG00000114923 | 0.018248385 | 0.025759978 | 0.026689493 | 0.016873007 |
| ENSG00000106538 | 0.135672322 | 0.097116431 | 0.0732806   | 0.094929344 |
| ENSG00000145014 | 0.051290741 | 0.046802565 | 0.053296091 | 0.052768631 |
| ENSG00000170893 | 0.015712264 | 0.025227216 | 0.025090408 | 0.015248005 |
| ENSG00000137824 | 0.023269929 | 0.03018522  | 0.029639104 | 0.020712521 |
| ENSG00000178096 | 0.038817294 | 0.040610249 | 0.03752214  | 0.030309304 |
| ENSG00000104915 | 0.024602036 | 0.030032795 | 0.031384452 | 0.03181753  |
| ENSG00000038274 | 0.029660246 | 0.034483374 | 0.038714915 | 0.026860663 |
| ENSG00000102001 | 0.021722561 | 0.032528448 | 0.028996225 | 0.020163175 |
| ENSG00000127377 | 0.01645105  | 0.024841819 | 0.02502151  | 0.016459643 |
| ENSG00000176153 | 0.014797971 | 0.024651038 | 0.024756579 | 0.014317732 |
| ENSG00000099949 | 0.026018796 | 0.037807761 | 0.031370456 | 0.029312913 |
| ENSG00000111880 | 0.04854555  | 0.046256581 | 0.042280988 | 0.040817915 |
| ENSG00000075461 | 0.017067819 | 0.024749755 | 0.025279597 | 0.01582189  |
| ENSG00000054983 | 0.045346105 | 0.041059728 | 0.036179259 | 0.034379419 |
| ENSG00000198356 | 0.026824533 | 0.032569742 | 0.029951493 | 0.027294798 |
| ENSG00000198689 | 0.034843277 | 0.041245294 | 0.035904989 | 0.028851421 |
| ENSG00000130844 | 0.043485539 | 0.063345634 | 0.051094084 | 0.031948598 |
| ENSG00000104897 | 0.023409865 | 0.028510779 | 0.029471008 | 0.023002376 |
| ENSG00000137875 | 0.074774997 | 0.05316748  | 0.048279925 | 0.052752767 |
| ENSG00000183831 | 0.017990942 | 0.025413346 | 0.026877716 | 0.017563351 |
| ENSG00000185352 | 0.014944334 | 0.024379556 | 0.025716738 | 0.015385414 |
| ENSG00000109576 | 0.016697062 | 0.024293056 | 0.024418063 | 0.016081584 |

|                 |             |             |             |             |
|-----------------|-------------|-------------|-------------|-------------|
| ENSG00000129824 | 0.368804182 | 0.384301412 | 0.368915922 | 0.340430059 |
| ENSG00000169900 | 0.015143021 | 0.025427679 | 0.024957966 | 0.014574296 |
| ENSG00000143556 | 0.020951905 | 0.028578342 | 0.027544856 | 0.019249874 |
| ENSG00000183762 | 0.01753937  | 0.026127531 | 0.026521057 | 0.015974338 |
| ENSG00000136536 | 0.035343288 | 0.045746504 | 0.03939003  | 0.04286444  |
| ENSG00000176239 | 0.0165799   | 0.025125996 | 0.025905691 | 0.015536243 |
| ENSG00000158050 | 0.051312922 | 0.037478883 | 0.039966071 | 0.042189709 |
| ENSG00000186496 | 0.016836171 | 0.025282862 | 0.025372046 | 0.016866176 |
| ENSG00000140396 | 0.020111055 | 0.027817196 | 0.027718137 | 0.01921957  |
| ENSG00000169403 | 0.089234978 | 0.072241684 | 0.055301288 | 0.07141188  |
| ENSG00000176095 | 0.025400233 | 0.033502318 | 0.03376588  | 0.026291233 |
| ENSG00000131067 | 0.017215731 | 0.025822359 | 0.024958233 | 0.016854358 |
| ENSG00000180098 | 0.02232647  | 0.028466202 | 0.026981229 | 0.017132016 |
| ENSG00000229361 | 0.015991899 | 0.026433855 | 0.0248865   | 0.016056791 |
| ENSG00000132768 | 0.031065747 | 0.032377056 | 0.031974089 | 0.033025098 |
| ENSG00000198842 | 0.01683254  | 0.025079181 | 0.025052992 | 0.015593169 |
| ENSG00000108039 | 0.02714617  | 0.030536683 | 0.030262642 | 0.020817574 |
| ENSG00000198885 | 0.01945732  | 0.025183778 | 0.02860192  | 0.018613971 |
| ENSG00000144120 | 0.025196985 | 0.028167612 | 0.027678954 | 0.021685041 |
| ENSG00000110274 | 0.02832081  | 0.034600692 | 0.03026587  | 0.024839815 |
| ENSG00000099942 | 0.023576469 | 0.030785107 | 0.030855391 | 0.019329612 |
| ENSG00000158406 | 0.059614787 | 0.052248211 | 0.042448711 | 0.04516011  |
| ENSG00000177432 | 0.032826381 | 0.033398521 | 0.034213563 | 0.033696891 |
| ENSG00000169598 | 0.031307295 | 0.034275431 | 0.034200246 | 0.026375088 |
| ENSG00000163214 | 0.015979067 | 0.025738029 | 0.02400864  | 0.015098257 |
| ENSG00000143815 | 0.015278556 | 0.025161279 | 0.024297448 | 0.01568271  |
| ENSG00000175216 | 0.02806412  | 0.035402264 | 0.02878568  | 0.022043995 |
| ENSG00000131462 | 0.035977729 | 0.037306643 | 0.032233845 | 0.031839021 |
| ENSG00000171403 | 0.015545443 | 0.024737264 | 0.025536484 | 0.015188597 |
| ENSG00000135074 | 0.099470894 | 0.090578582 | 0.070692506 | 0.094987774 |
| ENSG00000167272 | 0.036788307 | 0.036396629 | 0.035718464 | 0.032841458 |
| ENSG00000140983 | 0.024493497 | 0.030503011 | 0.029556484 | 0.020199223 |
| ENSG00000176407 | 0.021764396 | 0.028245129 | 0.026466015 | 0.017533454 |
| ENSG00000109680 | 0.029367078 | 0.038090455 | 0.029291863 | 0.025244562 |
| ENSG00000104299 | 0.02542154  | 0.033702805 | 0.033677148 | 0.030217583 |
| ENSG00000140835 | 0.076117356 | 0.067857194 | 0.049916483 | 0.04914639  |
| ENSG00000006194 | 0.029012119 | 0.041237106 | 0.044570042 | 0.024136306 |
| ENSG00000019102 | 0.019440075 | 0.026941261 | 0.026301676 | 0.017266731 |
| ENSG00000173660 | 0.027256706 | 0.027786927 | 0.027809817 | 0.020316333 |
| ENSG00000105954 | 0.014320091 | 0.024554095 | 0.025463433 | 0.016212197 |
| ENSG00000158014 | 0.015208723 | 0.025184967 | 0.025048919 | 0.01521277  |
| ENSG00000130640 | 0.026726474 | 0.031091863 | 0.032379998 | 0.022343375 |
| ENSG00000131697 | 0.043166084 | 0.04598499  | 0.041357021 | 0.031470479 |
| ENSG00000147010 | 0.029288503 | 0.028339251 | 0.03170193  | 0.0233631   |
| ENSG00000139133 | 0.026725599 | 0.033391624 | 0.031965652 | 0.022523657 |
| ENSG00000158042 | 0.030018816 | 0.029430934 | 0.034445927 | 0.021677985 |
| ENSG00000178773 | 0.089523556 | 0.058661559 | 0.047924713 | 0.059481502 |
| ENSG00000160551 | 0.026674559 | 0.034211992 | 0.033656098 | 0.036287846 |
| ENSG00000177917 | 0.04499026  | 0.043426003 | 0.035613184 | 0.030042618 |
| ENSG00000135363 | 0.104379918 | 0.094099747 | 0.101564015 | 0.111392024 |
| ENSG00000185087 | 0.017224064 | 0.025032414 | 0.025803151 | 0.018219786 |
| ENSG00000187837 | 0.066367814 | 0.07313054  | 0.068866781 | 0.0642724   |
| ENSG00000136750 | 0.020285125 | 0.025868532 | 0.027576773 | 0.019426568 |
| ENSG00000174844 | 0.01470137  | 0.024758763 | 0.025295525 | 0.014971218 |

|                 |             |             |             |             |
|-----------------|-------------|-------------|-------------|-------------|
| ENSG00000170145 | 0.016218168 | 0.025537024 | 0.024690884 | 0.01527739  |
| ENSG00000079462 | 0.039260215 | 0.037041859 | 0.033701935 | 0.029492928 |
| ENSG00000197408 | 0.016827172 | 0.025581093 | 0.024512522 | 0.018041164 |
| ENSG00000159348 | 0.030471446 | 0.031337287 | 0.037285779 | 0.024032633 |
| ENSG00000126947 | 0.099520655 | 0.058026857 | 0.058992266 | 0.054162502 |
| ENSG00000120458 | 0.03182928  | 0.040462555 | 0.035212016 | 0.029820585 |
| ENSG00000011132 | 0.027654394 | 0.028103934 | 0.033678383 | 0.030037126 |
| ENSG00000109943 | 0.024223019 | 0.025225691 | 0.026346615 | 0.016483375 |
| ENSG00000072133 | 0.022846311 | 0.027000913 | 0.026265409 | 0.019925646 |
| ENSG00000111490 | 0.093158775 | 0.050692971 | 0.026838693 | 0.045845966 |
| ENSG00000162591 | 0.067567242 | 0.058415122 | 0.059315753 | 0.060834492 |
| ENSG00000134986 | 0.062251969 | 0.049254882 | 0.050113496 | 0.051982778 |
| ENSG00000109832 | 0.018814945 | 0.025449317 | 0.024350572 | 0.016544676 |
| ENSG00000166819 | 0.01488791  | 0.02533628  | 0.024042815 | 0.014763062 |
| ENSG00000111536 | 0.020423438 | 0.0262282   | 0.027977404 | 0.017865983 |
| ENSG00000023330 | 0.033471184 | 0.034849409 | 0.031861448 | 0.026374279 |
| ENSG00000156096 | 0.015877783 | 0.024730743 | 0.026160375 | 0.01656492  |
| ENSG00000130208 | 0.084542293 | 0.059039656 | 0.054854448 | 0.061985142 |
| ENSG00000111783 | 0.024045514 | 0.028237193 | 0.028258485 | 0.027637019 |
| ENSG00000159197 | 0.017611779 | 0.025609633 | 0.025444216 | 0.016559887 |
| ENSG00000102100 | 0.015604529 | 0.025031586 | 0.025239404 | 0.016722759 |
| ENSG00000118194 | 0.01583933  | 0.02542114  | 0.024723134 | 0.015298538 |
| ENSG00000136715 | 0.028330085 | 0.035348665 | 0.03210648  | 0.021584903 |
| ENSG00000158373 | 0.065578993 | 0.066402533 | 0.054722253 | 0.062831911 |
| ENSG00000113249 | 0.016635196 | 0.027400066 | 0.026648481 | 0.016995364 |
| ENSG00000142669 | 0.025565649 | 0.031948651 | 0.027720763 | 0.023599354 |
| ENSG00000120820 | 0.016224719 | 0.024839255 | 0.025778888 | 0.014376783 |
| ENSG00000172774 | 0.01534113  | 0.025466113 | 0.02469061  | 0.014742756 |
| ENSG00000166881 | 0.019424149 | 0.027232471 | 0.026181081 | 0.017480545 |
| ENSG00000196586 | 0.0905593   | 0.063647269 | 0.063793755 | 0.057420277 |
| ENSG00000100271 | 0.031500803 | 0.030339069 | 0.031718313 | 0.028724926 |
| ENSG00000173275 | 0.028292163 | 0.039280013 | 0.029565059 | 0.025718589 |
| ENSG00000170743 | 0.018547091 | 0.026691958 | 0.027429556 | 0.018180919 |
| ENSG00000070756 | 0.014976136 | 0.024331382 | 0.025127443 | 0.014698083 |
| ENSG00000164171 | 0.017114839 | 0.025566173 | 0.02418892  | 0.015740794 |
| ENSG00000003436 | 0.028053552 | 0.026645013 | 0.024819573 | 0.016110312 |
| ENSG00000150995 | 0.04667243  | 0.042634048 | 0.036175816 | 0.040706867 |
| ENSG00000175110 | 0.031183075 | 0.030255094 | 0.030488563 | 0.021782515 |
| ENSG00000161682 | 0.017839225 | 0.024087126 | 0.024910966 | 0.015327457 |
| ENSG00000214897 | 0.035324584 | 0.04121915  | 0.03309336  | 0.034782399 |
| ENSG00000101079 | 0.034355464 | 0.038483823 | 0.034975899 | 0.031154719 |
| ENSG00000182901 | 0.016273721 | 0.024756735 | 0.024210715 | 0.015575778 |
| ENSG00000141446 | 0.027176783 | 0.032973514 | 0.032802427 | 0.027810556 |
| ENSG00000130758 | 0.016875371 | 0.025012378 | 0.024846344 | 0.014765557 |
| ENSG00000180425 | 0.040602911 | 0.03812812  | 0.031519273 | 0.026101453 |
| ENSG00000131435 | 0.015694421 | 0.026239755 | 0.024476997 | 0.015207661 |
| ENSG00000150594 | 0.017898258 | 0.026223364 | 0.024851126 | 0.015860997 |
| ENSG00000136810 | 0.022447291 | 0.027433487 | 0.026294032 | 0.017841177 |
| ENSG00000082014 | 0.016262908 | 0.024576573 | 0.025215748 | 0.015507281 |
| ENSG00000139372 | 0.02507238  | 0.033504724 | 0.035480761 | 0.029337579 |
| ENSG00000089163 | 0.030142059 | 0.037030669 | 0.035825485 | 0.025725476 |
| ENSG00000087502 | 0.02972973  | 0.033082033 | 0.031839083 | 0.024143989 |
| ENSG00000134438 | 0.017537175 | 0.027782431 | 0.025912937 | 0.016941459 |
| ENSG00000198873 | 0.046900929 | 0.042254384 | 0.045259053 | 0.046914199 |



|                 |             |             |             |             |
|-----------------|-------------|-------------|-------------|-------------|
| ENSG00000146039 | 0.015922867 | 0.025086259 | 0.024210638 | 0.014760235 |
| ENSG00000153029 | 0.032672764 | 0.035911777 | 0.036480008 | 0.032124891 |
| ENSG00000157881 | 0.025813616 | 0.03188177  | 0.031390276 | 0.022320736 |
| ENSG00000239713 | 0.032959501 | 0.03408833  | 0.034006856 | 0.028095835 |
| ENSG00000149485 | 0.043882866 | 0.037147564 | 0.032008623 | 0.033636436 |
| ENSG00000103034 | 0.016312696 | 0.027053109 | 0.026059343 | 0.01622349  |
| ENSG00000153046 | 0.0162478   | 0.024376284 | 0.026560728 | 0.015467776 |
| ENSG00000076201 | 0.026292407 | 0.029105792 | 0.043649539 | 0.030866505 |
| ENSG00000183891 | 0.040498603 | 0.051030684 | 0.049368072 | 0.035242687 |
| ENSG00000160991 | 0.043213463 | 0.041008844 | 0.053555783 | 0.041894191 |
| ENSG00000009694 | 0.01600888  | 0.025241916 | 0.025596228 | 0.015799815 |
| ENSG00000197771 | 0.039005403 | 0.033274231 | 0.030610475 | 0.033958531 |
| ENSG00000150977 | 0.034268714 | 0.034677464 | 0.034210977 | 0.033411243 |
| ENSG00000168488 | 0.022986408 | 0.041613094 | 0.042552107 | 0.042776477 |
| ENSG00000165819 | 0.03615418  | 0.036430598 | 0.031482229 | 0.023516667 |
| ENSG00000132693 | 0.015995444 | 0.025540898 | 0.02552797  | 0.015602074 |
| ENSG00000101413 | 0.01754737  | 0.024433247 | 0.025102407 | 0.015784107 |
| ENSG00000162433 | 0.02312745  | 0.031766355 | 0.030990035 | 0.024925848 |
| ENSG00000185811 | 0.068294395 | 0.068902077 | 0.089576286 | 0.071363582 |
| ENSG00000185818 | 0.016069547 | 0.025316584 | 0.025915272 | 0.014570289 |
| ENSG00000099998 | 0.017366292 | 0.026305188 | 0.027389799 | 0.016668142 |
| ENSG00000178473 | 0.014847398 | 0.02509529  | 0.024987283 | 0.014741529 |
| ENSG00000114124 | 0.015823936 | 0.025582987 | 0.024704331 | 0.01678269  |
| ENSG00000076242 | 0.035891629 | 0.036667932 | 0.030028918 | 0.025594082 |
| ENSG00000215114 | 0.019935167 | 0.027852255 | 0.027026262 | 0.018834701 |
| ENSG00000178726 | 0.019865813 | 0.025189235 | 0.024941527 | 0.015572032 |
| ENSG00000197444 | 0.07023563  | 0.04370421  | 0.048387271 | 0.033628697 |
| ENSG00000214274 | 0.054174439 | 0.041565628 | 0.050588972 | 0.047964487 |
| ENSG00000237190 | 0.017421371 | 0.026395673 | 0.024935597 | 0.018220587 |
| ENSG00000165591 | 0.036102725 | 0.032887626 | 0.032227544 | 0.030155439 |
| ENSG00000160868 | 0.030731507 | 0.030677107 | 0.032254673 | 0.028195058 |
| ENSG00000213390 | 0.017980235 | 0.025934202 | 0.025115686 | 0.016489374 |
| ENSG00000116750 | 0.028624238 | 0.034138515 | 0.028863407 | 0.027430819 |
| ENSG00000085982 | 0.01601893  | 0.029851527 | 0.025310073 | 0.017030664 |
| ENSG00000204564 | 0.02662035  | 0.031344945 | 0.028898983 | 0.026830792 |
| ENSG00000127483 | 0.031584306 | 0.037827248 | 0.031219174 | 0.021789282 |
| ENSG00000105996 | 0.027560629 | 0.031586724 | 0.040592435 | 0.022762303 |
| ENSG00000189159 | 0.027208869 | 0.03064209  | 0.02878275  | 0.024739042 |
| ENSG00000156876 | 0.036814151 | 0.034066258 | 0.033457218 | 0.037589306 |
| ENSG00000137642 | 0.039273834 | 0.050560952 | 0.042858307 | 0.057002403 |
| ENSG00000106992 | 0.043391297 | 0.040106502 | 0.039045622 | 0.051834086 |
| ENSG00000232382 | 0.016143854 | 0.025868014 | 0.02428446  | 0.015393454 |
| ENSG00000114978 | 0.035943975 | 0.042127746 | 0.036523065 | 0.052108028 |
| ENSG00000170837 | 0.016544205 | 0.02558181  | 0.025271599 | 0.016828025 |
| ENSG00000198477 | 0.067556043 | 0.050897984 | 0.054426723 | 0.048102337 |
| ENSG00000149547 | 0.030695883 | 0.03205208  | 0.032214241 | 0.029642281 |
| ENSG00000130479 | 0.02420887  | 0.035082023 | 0.044574246 | 0.026167066 |
| ENSG00000205208 | 0.035375945 | 0.03883809  | 0.035448218 | 0.026094218 |
| ENSG00000170412 | 0.10583769  | 0.066405646 | 0.058906339 | 0.075429992 |
| ENSG00000177932 | 0.017042822 | 0.02711748  | 0.025884641 | 0.016722529 |
| ENSG00000204388 | 0.067235338 | 0.040138727 | 0.050859649 | 0.052437886 |
| ENSG00000166840 | 0.018097204 | 0.026201227 | 0.025220209 | 0.016810588 |
| ENSG00000103449 | 0.016257612 | 0.026275524 | 0.025187138 | 0.017216133 |
| ENSG00000144230 | 0.015695878 | 0.025290898 | 0.025103788 | 0.015558695 |

|                 |             |             |             |             |
|-----------------|-------------|-------------|-------------|-------------|
| ENSG00000155961 | 0.038065649 | 0.036355786 | 0.032746404 | 0.038242621 |
| ENSG00000005513 | 0.016882646 | 0.026419826 | 0.026327771 | 0.014474932 |
| ENSG00000151914 | 0.030516611 | 0.033283868 | 0.033426825 | 0.032229302 |
| ENSG00000116641 | 0.037318444 | 0.044278118 | 0.032905644 | 0.034063589 |
| ENSG00000183671 | 0.029808062 | 0.031672934 | 0.031098998 | 0.029201643 |
| ENSG00000197859 | 0.044553145 | 0.03470295  | 0.029669291 | 0.027810313 |
| ENSG00000171659 | 0.076633249 | 0.039041161 | 0.031780259 | 0.043119664 |
| ENSG00000171169 | 0.022058025 | 0.026428959 | 0.026897065 | 0.017966125 |
| ENSG00000065911 | 0.029873618 | 0.03135657  | 0.028560875 | 0.02769211  |
| ENSG00000115107 | 0.018139033 | 0.025369599 | 0.025275706 | 0.016917428 |
| ENSG00000128039 | 0.032984801 | 0.033274819 | 0.03316112  | 0.038727184 |
| ENSG00000197273 | 0.019386767 | 0.025618454 | 0.025003202 | 0.017181915 |
| ENSG00000146047 | 0.014983043 | 0.02531766  | 0.025057334 | 0.015051905 |
| ENSG00000165410 | 0.019146336 | 0.027043249 | 0.02496234  | 0.017068711 |
| ENSG00000012223 | 0.017480837 | 0.024991132 | 0.025324862 | 0.026954628 |
| ENSG00000083223 | 0.029046898 | 0.037599915 | 0.035716466 | 0.029294469 |
| ENSG00000145936 | 0.086557254 | 0.103411122 | 0.090205509 | 0.098758933 |
| ENSG00000169519 | 0.05192666  | 0.077164455 | 0.070311445 | 0.07209653  |
| ENSG00000110851 | 0.032453617 | 0.043280099 | 0.041474887 | 0.029856834 |
| ENSG00000116489 | 0.024736975 | 0.032042298 | 0.030360003 | 0.02930262  |
| ENSG00000183354 | 0.028835507 | 0.034342133 | 0.035443333 | 0.026710728 |
| ENSG00000085063 | 0.03240507  | 0.032259678 | 0.031670631 | 0.027359374 |
| ENSG00000146285 | 0.01672057  | 0.025017221 | 0.024397953 | 0.016232011 |
| ENSG00000196670 | 0.031407079 | 0.035196787 | 0.032308489 | 0.025810179 |
| ENSG00000170946 | 0.031271602 | 0.036661516 | 0.031515722 | 0.026302102 |
| ENSG00000138308 | 0.015641081 | 0.024918486 | 0.024777176 | 0.015843153 |
| ENSG00000175106 | 0.018397955 | 0.0254816   | 0.026090418 | 0.017841856 |
| ENSG00000127074 | 0.167543334 | 0.086822829 | 0.066400066 | 0.135156929 |
| ENSG00000238023 | 0.017722099 | 0.025115611 | 0.024381269 | 0.016593818 |
| ENSG00000075239 | 0.030956983 | 0.034513253 | 0.031298293 | 0.022603973 |
| ENSG00000183632 | 0.028098252 | 0.056384083 | 0.04004436  | 0.031271284 |
| ENSG00000177138 | 0.016175223 | 0.026976334 | 0.025009585 | 0.015050046 |
| ENSG00000090920 | 0.046260281 | 0.056499951 | 0.054565163 | 0.048233319 |
| ENSG00000147548 | 0.033481096 | 0.036408362 | 0.035546311 | 0.028592549 |
| ENSG00000123358 | 0.01620504  | 0.026477753 | 0.025568909 | 0.016067256 |
| ENSG00000100312 | 0.015914389 | 0.026385289 | 0.025517303 | 0.015215826 |
| ENSG00000106554 | 0.02627771  | 0.030021929 | 0.028150953 | 0.024510332 |
| ENSG00000084674 | 0.015237926 | 0.024214729 | 0.024863996 | 0.015041339 |
| ENSG00000119689 | 0.023100674 | 0.031821335 | 0.036105284 | 0.02656267  |
| ENSG00000146834 | 0.037475353 | 0.034268305 | 0.041823957 | 0.030839995 |
| ENSG00000129991 | 0.017745748 | 0.024331582 | 0.025539713 | 0.019166335 |
| ENSG00000163751 | 0.01687079  | 0.025511943 | 0.025387783 | 0.01564725  |
| ENSG00000072778 | 0.025452714 | 0.030105133 | 0.028635912 | 0.02232063  |
| ENSG00000144455 | 0.034708296 | 0.034249867 | 0.031855431 | 0.035885783 |
| ENSG00000162722 | 0.027921411 | 0.029168262 | 0.030063443 | 0.024242378 |
| ENSG00000158793 | 0.034148915 | 0.033755293 | 0.029924168 | 0.023820468 |
| ENSG00000138131 | 0.042490376 | 0.036576976 | 0.034311561 | 0.030055728 |
| ENSG00000144741 | 0.02368893  | 0.030426505 | 0.02958091  | 0.02305515  |
| ENSG00000106331 | 0.014729258 | 0.025723006 | 0.024694816 | 0.014961879 |
| ENSG00000165584 | 0.017180569 | 0.025814462 | 0.025370486 | 0.017981781 |
| ENSG00000105732 | 0.027459775 | 0.030998212 | 0.03639603  | 0.030013691 |
| ENSG00000168785 | 0.036541497 | 0.034862503 | 0.028699107 | 0.028851885 |
| ENSG00000122691 | 0.015435834 | 0.024063864 | 0.024269828 | 0.014725779 |
| ENSG00000137675 | 0.01460821  | 0.025888004 | 0.024487318 | 0.015811002 |

|                 |             |             |             |             |
|-----------------|-------------|-------------|-------------|-------------|
| ENSG00000101928 | 0.026132938 | 0.033391844 | 0.033260452 | 0.021415999 |
| ENSG00000124602 | 0.020498252 | 0.02662319  | 0.027257685 | 0.024082621 |
| ENSG00000163694 | 0.038222491 | 0.035195578 | 0.03560638  | 0.033576021 |
| ENSG00000231500 | 0.015249804 | 0.0238596   | 0.023789199 | 0.015581297 |
| ENSG00000179133 | 0.01574662  | 0.025153395 | 0.024290295 | 0.015037806 |
| ENSG00000125459 | 0.040149843 | 0.036472879 | 0.039386672 | 0.037132693 |
| ENSG00000134815 | 0.033039683 | 0.038305853 | 0.029132639 | 0.026517582 |
| ENSG00000168286 | 0.024694773 | 0.031258529 | 0.02805423  | 0.020158666 |
| ENSG00000164113 | 0.015040074 | 0.025510284 | 0.024770633 | 0.014287592 |
| ENSG00000134077 | 0.030092027 | 0.034380591 | 0.028657566 | 0.022915945 |
| ENSG00000090316 | 0.025382448 | 0.032299751 | 0.030536082 | 0.027463925 |
| ENSG00000169340 | 0.017012215 | 0.024875777 | 0.024412419 | 0.015585007 |
| ENSG00000189409 | 0.05540893  | 0.060343224 | 0.060809666 | 0.04434409  |
| ENSG00000169258 | 0.027900059 | 0.026067455 | 0.028259559 | 0.027385361 |
| ENSG00000072071 | 0.017911106 | 0.025560475 | 0.026410023 | 0.017821339 |
| ENSG00000188676 | 0.019947253 | 0.027530683 | 0.025819827 | 0.023515647 |
| ENSG00000116679 | 0.056129567 | 0.04627864  | 0.038738246 | 0.03988234  |
| ENSG00000163220 | 0.031099665 | 0.025602143 | 0.027099547 | 0.030585973 |
| ENSG00000187094 | 0.03739009  | 0.040977503 | 0.025814859 | 0.017344762 |
| ENSG00000160505 | 0.080286526 | 0.050573821 | 0.075220184 | 0.080280565 |
| ENSG00000186143 | 0.015984982 | 0.024160275 | 0.024804254 | 0.015043487 |
| ENSG00000143382 | 0.017795787 | 0.02580404  | 0.025878131 | 0.016008622 |
| ENSG00000103528 | 0.058421554 | 0.04970631  | 0.044954194 | 0.04643822  |
| ENSG00000214946 | 0.016646884 | 0.024092588 | 0.025279088 | 0.014761911 |
| ENSG00000049249 | 0.063448193 | 0.055837487 | 0.046817552 | 0.058608486 |
| ENSG00000146587 | 0.022638634 | 0.02807008  | 0.028567695 | 0.024494827 |
| ENSG00000144233 | 0.031276106 | 0.041567444 | 0.038087602 | 0.026870021 |
| ENSG00000004777 | 0.023179619 | 0.02851574  | 0.027766223 | 0.022461584 |
| ENSG00000057149 | 0.015420564 | 0.024984317 | 0.025190776 | 0.014997665 |
| ENSG00000126267 | 0.018279117 | 0.025459397 | 0.024924747 | 0.015186694 |
| ENSG00000163884 | 0.016291105 | 0.024706605 | 0.024766969 | 0.015294826 |
| ENSG00000163072 | 0.015436374 | 0.024803465 | 0.025832214 | 0.015460476 |
| ENSG00000120899 | 0.03777326  | 0.034096763 | 0.035086042 | 0.029611716 |
| ENSG00000124313 | 0.018015369 | 0.026576838 | 0.02547686  | 0.018729479 |
| ENSG00000123569 | 0.016392    | 0.024972447 | 0.024485975 | 0.015247421 |
| ENSG00000067596 | 0.020802109 | 0.029490044 | 0.031873752 | 0.023123225 |
| ENSG00000163945 | 0.028361339 | 0.038961221 | 0.032714543 | 0.023333035 |
| ENSG00000080802 | 0.026106658 | 0.032125435 | 0.03125865  | 0.023007131 |
| ENSG00000103351 | 0.030156281 | 0.028211929 | 0.027072599 | 0.020643865 |
| ENSG00000182880 | 0.016899545 | 0.025769189 | 0.024379909 | 0.015679045 |
| ENSG00000175073 | 0.033628542 | 0.0407002   | 0.033063117 | 0.030815131 |
| ENSG00000144354 | 0.055541873 | 0.054591987 | 0.048789382 | 0.054496675 |
| ENSG00000147655 | 0.016342196 | 0.025561789 | 0.025486861 | 0.015340841 |
| ENSG00000138759 | 0.018248701 | 0.025274262 | 0.026098405 | 0.017161924 |
| ENSG00000181472 | 0.032676223 | 0.035050667 | 0.039361642 | 0.026980961 |
| ENSG00000172889 | 0.033026343 | 0.032993705 | 0.030687969 | 0.030491748 |
| ENSG00000157429 | 0.016250344 | 0.026720419 | 0.025367105 | 0.017121129 |
| ENSG00000164683 | 0.104301353 | 0.086048319 | 0.095320901 | 0.104783007 |
| ENSG00000180104 | 0.024609758 | 0.02862215  | 0.029937257 | 0.020987955 |
| ENSG00000134709 | 0.083391472 | 0.062312513 | 0.057235645 | 0.070830018 |
| ENSG00000144834 | 0.022620547 | 0.033651971 | 0.026476412 | 0.019002955 |
| ENSG00000101109 | 0.021557328 | 0.026551841 | 0.029348376 | 0.020651219 |
| ENSG00000117407 | 0.018258043 | 0.024454789 | 0.026838711 | 0.015922906 |
| ENSG00000164983 | 0.068195323 | 0.06225246  | 0.048429025 | 0.053018724 |

|                 |             |             |             |             |
|-----------------|-------------|-------------|-------------|-------------|
| ENSG00000153933 | 0.023596695 | 0.031966664 | 0.02751954  | 0.023159582 |
| ENSG00000205572 | 0.024011983 | 0.027664352 | 0.029881193 | 0.02159379  |
| ENSG00000100478 | 0.01511918  | 0.024024539 | 0.024886305 | 0.014517219 |
| ENSG00000161914 | 0.02951972  | 0.036369038 | 0.034700006 | 0.026171384 |
| ENSG00000141316 | 0.039434164 | 0.029446013 | 0.026337618 | 0.028018058 |
| ENSG00000162521 | 0.025976214 | 0.033645248 | 0.030232161 | 0.02425743  |
| ENSG00000183049 | 0.025249437 | 0.03005613  | 0.032107743 | 0.024206895 |
| ENSG00000164128 | 0.018075082 | 0.025452262 | 0.024720899 | 0.015687401 |
| ENSG00000104371 | 0.034386786 | 0.031589232 | 0.027522114 | 0.026080694 |
| ENSG00000140526 | 0.021076359 | 0.028826777 | 0.026569253 | 0.019177324 |
| ENSG00000169856 | 0.016518861 | 0.024974401 | 0.025564284 | 0.016109723 |
| ENSG00000109193 | 0.017604698 | 0.026490251 | 0.024894619 | 0.015559978 |
| ENSG00000119574 | 0.028725926 | 0.032835702 | 0.036471229 | 0.029301333 |
| ENSG00000185532 | 0.017494503 | 0.027051305 | 0.026023216 | 0.016965573 |
| ENSG00000176101 | 0.021578751 | 0.02764653  | 0.026844945 | 0.022570199 |
| ENSG00000184108 | 0.015913239 | 0.025282432 | 0.025922701 | 0.016634546 |
| ENSG00000124702 | 0.029932143 | 0.035744535 | 0.029587352 | 0.026363553 |
| ENSG00000125968 | 0.020012125 | 0.026141165 | 0.027022174 | 0.019177502 |
| ENSG00000099260 | 0.015215605 | 0.025107264 | 0.025610807 | 0.014496639 |
| ENSG00000120210 | 0.015715664 | 0.025857591 | 0.024895692 | 0.015347732 |
| ENSG00000183853 | 0.020524337 | 0.026403186 | 0.026787083 | 0.021357074 |
| ENSG00000175573 | 0.02830433  | 0.030416655 | 0.030189238 | 0.027002557 |
| ENSG00000165061 | 0.015505447 | 0.025596816 | 0.025647535 | 0.014723121 |
| ENSG00000204022 | 0.018455699 | 0.025408081 | 0.025781305 | 0.018035075 |
| ENSG00000066379 | 0.025352682 | 0.032672308 | 0.036331509 | 0.029262943 |
| ENSG00000184349 | 0.018513787 | 0.026161487 | 0.024928869 | 0.015768665 |
| ENSG00000189043 | 0.017380952 | 0.025690491 | 0.02486755  | 0.018008091 |
| ENSG00000243137 | 0.0153471   | 0.025819606 | 0.024756614 | 0.016060735 |
| ENSG00000166803 | 0.043242269 | 0.036681913 | 0.030262736 | 0.026507493 |
| ENSG00000167889 | 0.016069113 | 0.026316159 | 0.024506658 | 0.016636493 |
| ENSG00000114315 | 0.040641876 | 0.033629495 | 0.034921863 | 0.039599713 |
| ENSG00000009844 | 0.026996999 | 0.034613126 | 0.031791304 | 0.028574443 |
| ENSG00000181322 | 0.016211994 | 0.024669122 | 0.024592337 | 0.014745531 |
| ENSG00000136327 | 0.016050551 | 0.025694946 | 0.025497736 | 0.015399626 |
| ENSG00000013563 | 0.039037073 | 0.033730039 | 0.034220593 | 0.03195059  |
| ENSG00000125304 | 0.026268195 | 0.033735489 | 0.031784474 | 0.026565805 |
| ENSG00000166262 | 0.017199509 | 0.026254068 | 0.025224654 | 0.016572937 |
| ENSG00000153951 | 0.017222804 | 0.02539582  | 0.025321091 | 0.014502892 |
| ENSG00000126934 | 0.024627305 | 0.026931998 | 0.027389111 | 0.025690528 |
| ENSG00000130300 | 0.026080756 | 0.036854118 | 0.028424619 | 0.029393418 |
| ENSG00000115008 | 0.162379424 | 0.11551867  | 0.09411282  | 0.113112351 |
| ENSG00000181773 | 0.027761475 | 0.028830949 | 0.027393368 | 0.020354404 |
| ENSG00000123427 | 0.051396652 | 0.041232859 | 0.044445355 | 0.040029196 |
| ENSG00000132958 | 0.021136697 | 0.025518147 | 0.026268813 | 0.019015123 |
| ENSG00000104142 | 0.023973111 | 0.044106707 | 0.045552825 | 0.031932921 |
| ENSG00000147536 | 0.046934927 | 0.045745227 | 0.035027638 | 0.036719236 |
| ENSG00000176884 | 0.077524211 | 0.065165002 | 0.057350759 | 0.076766071 |
| ENSG00000138336 | 0.016963382 | 0.024532083 | 0.025337574 | 0.015409749 |
| ENSG00000034053 | 0.015544061 | 0.025509518 | 0.024460821 | 0.015582733 |
| ENSG00000118495 | 0.059066312 | 0.041838766 | 0.042886425 | 0.06381995  |
| ENSG00000122642 | 0.024464011 | 0.034816051 | 0.030130649 | 0.027850976 |
| ENSG00000159111 | 0.028137941 | 0.033889253 | 0.032723465 | 0.022356992 |
| ENSG00000176020 | 0.023247283 | 0.027513119 | 0.028514162 | 0.01705136  |
| ENSG00000143839 | 0.017664558 | 0.026253893 | 0.024120824 | 0.015835647 |

|                 |             |             |             |             |
|-----------------|-------------|-------------|-------------|-------------|
| ENSG0000008952  | 0.028274624 | 0.037391369 | 0.037148588 | 0.0271561   |
| ENSG00000164167 | 0.026222341 | 0.029100024 | 0.029157842 | 0.025228884 |
| ENSG00000187010 | 0.015265824 | 0.024838692 | 0.025366596 | 0.015285755 |
| ENSG00000168874 | 0.02661134  | 0.026000909 | 0.024389781 | 0.020778628 |
| ENSG00000142512 | 0.016845257 | 0.027434894 | 0.02444711  | 0.017418977 |
| ENSG00000197540 | 0.016446811 | 0.026350574 | 0.026236452 | 0.02582009  |
| ENSG00000116985 | 0.028214946 | 0.030113864 | 0.029548423 | 0.020430379 |
| ENSG00000186136 | 0.015775648 | 0.024831689 | 0.025018447 | 0.017301073 |
| ENSG00000067842 | 0.015241442 | 0.024919381 | 0.024753636 | 0.014866603 |
| ENSG00000127022 | 0.021246709 | 0.027696387 | 0.026242048 | 0.020276964 |
| ENSG00000186815 | 0.029173723 | 0.029918402 | 0.031759899 | 0.026190557 |
| ENSG00000095066 | 0.021765511 | 0.028265135 | 0.026509393 | 0.02499106  |
| ENSG00000180340 | 0.042402398 | 0.044402334 | 0.037411958 | 0.047098277 |
| ENSG00000130935 | 0.028692535 | 0.032181022 | 0.030206409 | 0.028298497 |
| ENSG00000075340 | 0.015955444 | 0.025525418 | 0.026733368 | 0.016669227 |
| ENSG00000152953 | 0.025843825 | 0.027986374 | 0.025313323 | 0.030749697 |
| ENSG00000112038 | 0.017434439 | 0.024603039 | 0.026312519 | 0.016335185 |
| ENSG00000130307 | 0.016209365 | 0.025858349 | 0.025537201 | 0.016563969 |
| ENSG00000177868 | 0.033620268 | 0.033668459 | 0.034775931 | 0.027887583 |
| ENSG00000140743 | 0.035084304 | 0.040821118 | 0.041202475 | 0.031329253 |
| ENSG00000113296 | 0.016522325 | 0.025412925 | 0.025354249 | 0.014787658 |
| ENSG00000184347 | 0.015465252 | 0.025351682 | 0.024229626 | 0.014534325 |
| ENSG00000161328 | 0.030872295 | 0.032396229 | 0.033502687 | 0.024622893 |
| ENSG00000162779 | 0.016376369 | 0.025024862 | 0.024133526 | 0.017248356 |
| ENSG00000140284 | 0.04115485  | 0.039215206 | 0.038772828 | 0.032802244 |
| ENSG00000168140 | 0.021554869 | 0.030563764 | 0.027745139 | 0.024097081 |
| ENSG00000175264 | 0.016161086 | 0.02533498  | 0.026426618 | 0.014656919 |
| ENSG00000240386 | 0.066937828 | 0.036796013 | 0.030789203 | 0.041723983 |
| ENSG00000144021 | 0.025995288 | 0.029953078 | 0.030334942 | 0.019559556 |
| ENSG00000182508 | 0.021494727 | 0.029994892 | 0.028262513 | 0.02126922  |
| ENSG00000091409 | 0.016081111 | 0.024855411 | 0.02534083  | 0.015400404 |
| ENSG00000117525 | 0.016924248 | 0.02549516  | 0.025679925 | 0.016584645 |
| ENSG00000182253 | 0.06666748  | 0.075045164 | 0.067368691 | 0.060514461 |
| ENSG00000145247 | 0.041593364 | 0.03997925  | 0.036837288 | 0.040431903 |
| ENSG00000067646 | 0.070227235 | 0.065465019 | 0.062442952 | 0.052315394 |
| ENSG00000176782 | 0.016128886 | 0.026183246 | 0.026308951 | 0.016188546 |
| ENSG00000185774 | 0.015356052 | 0.024645824 | 0.025558058 | 0.015381301 |
| ENSG00000141098 | 0.032242528 | 0.035728957 | 0.033037794 | 0.035018257 |
| ENSG00000111424 | 0.085915616 | 0.069423929 | 0.071987099 | 0.085724437 |
| ENSG00000120334 | 0.058119425 | 0.078389139 | 0.071156943 | 0.050766578 |
| ENSG00000128886 | 0.05771737  | 0.061434678 | 0.061636082 | 0.059163175 |
| ENSG00000147316 | 0.024915701 | 0.032113969 | 0.030956668 | 0.030820909 |
| ENSG00000103742 | 0.042239854 | 0.038366587 | 0.028883008 | 0.028033806 |
| ENSG00000157087 | 0.01793203  | 0.02468593  | 0.025900327 | 0.016304732 |
| ENSG00000134324 | 0.048018201 | 0.051882941 | 0.050063255 | 0.050219487 |
| ENSG00000138363 | 0.027549214 | 0.030549416 | 0.029088398 | 0.02548412  |
| ENSG00000120215 | 0.015082028 | 0.025477897 | 0.02568971  | 0.015435114 |
| ENSG00000167447 | 0.024283323 | 0.030518844 | 0.031902795 | 0.020283492 |
| ENSG00000135218 | 0.054082955 | 0.025621242 | 0.024371168 | 0.016214151 |
| ENSG00000120645 | 0.016462877 | 0.024647785 | 0.025132762 | 0.015690185 |
| ENSG00000159164 | 0.044851868 | 0.041620493 | 0.037498452 | 0.041745123 |
| ENSG00000164209 | 0.025599069 | 0.032429268 | 0.036802515 | 0.031763571 |
| ENSG00000152931 | 0.015918805 | 0.026052347 | 0.025129444 | 0.015037416 |
| ENSG00000173200 | 0.049122636 | 0.057117047 | 0.05049084  | 0.048293556 |

|                 |             |             |             |             |
|-----------------|-------------|-------------|-------------|-------------|
| ENSG00000170549 | 0.016952863 | 0.025180271 | 0.025064473 | 0.015150236 |
| ENSG00000106723 | 0.031384737 | 0.032555496 | 0.035171872 | 0.032278955 |
| ENSG00000099899 | 0.017616381 | 0.026603671 | 0.026784589 | 0.016287285 |
| ENSG00000155903 | 0.038040725 | 0.035653283 | 0.040340441 | 0.03513864  |
| ENSG00000073711 | 0.01667942  | 0.025607348 | 0.026943679 | 0.015516242 |
| ENSG00000115194 | 0.015517199 | 0.025618459 | 0.02587141  | 0.016423647 |
| ENSG00000136695 | 0.015945878 | 0.026387529 | 0.024947001 | 0.015767143 |
| ENSG00000176971 | 0.01625593  | 0.025435531 | 0.025522012 | 0.014604051 |
| ENSG00000132530 | 0.072970304 | 0.059922513 | 0.060311144 | 0.074089098 |
| ENSG00000187650 | 0.013076892 | 0.023329564 | 0.023787117 | 0.013394331 |
| ENSG00000125970 | 0.022621652 | 0.026029321 | 0.030747652 | 0.022057843 |
| ENSG00000075826 | 0.01761787  | 0.025823149 | 0.027484512 | 0.017800215 |
| ENSG00000196456 | 0.037168466 | 0.043221692 | 0.038028314 | 0.037781056 |
| ENSG00000141294 | 0.023091686 | 0.027602873 | 0.027641384 | 0.020858858 |
| ENSG00000197584 | 0.039345829 | 0.029427763 | 0.030544802 | 0.022093424 |
| ENSG00000149089 | 0.037325131 | 0.045992567 | 0.039693528 | 0.030055432 |
| ENSG00000178445 | 0.087052074 | 0.075535738 | 0.05912588  | 0.057106981 |
| ENSG00000156574 | 0.016467632 | 0.02533991  | 0.02543163  | 0.014698666 |
| ENSG00000165572 | 0.022702524 | 0.026894656 | 0.028928219 | 0.019001604 |
| ENSG00000204246 | 0.015635701 | 0.024370652 | 0.025360882 | 0.014650682 |
| ENSG00000145675 | 0.021328036 | 0.025636038 | 0.024720342 | 0.02026979  |
| ENSG00000070761 | 0.032921221 | 0.033811898 | 0.035147057 | 0.032007085 |
| ENSG00000110218 | 0.033190057 | 0.039427213 | 0.042906708 | 0.031182457 |
| ENSG00000196418 | 0.038458848 | 0.044804849 | 0.053208966 | 0.041999589 |
| ENSG00000152382 | 0.030727302 | 0.036057287 | 0.030127139 | 0.027664521 |
| ENSG00000157093 | 0.01630103  | 0.025585558 | 0.025569033 | 0.015336561 |
| ENSG00000135406 | 0.024023414 | 0.026384527 | 0.027321352 | 0.01664132  |
| ENSG00000233816 | 0.016689083 | 0.025444079 | 0.025947153 | 0.019038118 |
| ENSG00000104888 | 0.016402476 | 0.025383107 | 0.025113525 | 0.016337288 |
| ENSG00000166924 | 0.017929976 | 0.024971102 | 0.025247643 | 0.017460799 |
| ENSG00000126337 | 0.016369274 | 0.024668666 | 0.024482236 | 0.014991951 |
| ENSG00000160094 | 0.062183123 | 0.060345907 | 0.053453634 | 0.0643956   |
| ENSG00000181092 | 0.015377516 | 0.025608132 | 0.025514942 | 0.0161869   |
| ENSG00000123983 | 0.049098471 | 0.042465911 | 0.036521616 | 0.034462482 |
| ENSG00000164902 | 0.027880029 | 0.030876554 | 0.032746184 | 0.028453337 |
| ENSG00000172663 | 0.029216605 | 0.031609968 | 0.035204425 | 0.03066879  |
| ENSG00000168792 | 0.045116165 | 0.045449877 | 0.037927737 | 0.038648832 |
| ENSG00000177354 | 0.015553724 | 0.025346498 | 0.024752368 | 0.014664613 |
| ENSG00000103064 | 0.033379096 | 0.034754947 | 0.036060335 | 0.031129536 |
| ENSG00000198933 | 0.025797655 | 0.031890595 | 0.031399662 | 0.035258121 |
| ENSG00000126821 | 0.052361033 | 0.055113843 | 0.051193193 | 0.06108286  |
| ENSG00000171135 | 0.027048082 | 0.042779495 | 0.042398613 | 0.030057346 |
| ENSG00000155636 | 0.034854394 | 0.039379833 | 0.035659835 | 0.033422217 |
| ENSG00000174740 | 0.017257138 | 0.025551747 | 0.025308544 | 0.015754702 |
| ENSG00000142002 | 0.023877703 | 0.031251708 | 0.032450663 | 0.027359244 |
| ENSG00000125879 | 0.015373629 | 0.024548444 | 0.024300959 | 0.015038959 |
| ENSG00000221882 | 0.021299036 | 0.024373401 | 0.025876183 | 0.016034423 |
| ENSG00000164244 | 0.026190711 | 0.035721657 | 0.033734233 | 0.029290228 |
| ENSG00000163623 | 0.016902908 | 0.026389292 | 0.027054554 | 0.017257428 |
| ENSG00000168263 | 0.018761002 | 0.026154451 | 0.025997231 | 0.01651485  |
| ENSG00000130818 | 0.03054145  | 0.039529213 | 0.039621687 | 0.027055068 |
| ENSG00000163659 | 0.041317435 | 0.040289107 | 0.034527992 | 0.032181666 |
| ENSG00000170786 | 0.015550851 | 0.024741118 | 0.025027765 | 0.015210132 |
| ENSG00000181610 | 0.022782642 | 0.028643171 | 0.02744901  | 0.02105902  |

|                 |             |             |             |             |
|-----------------|-------------|-------------|-------------|-------------|
| ENSG00000147121 | 0.024900396 | 0.031720356 | 0.02820607  | 0.023697508 |
| ENSG00000092140 | 0.025560909 | 0.027883061 | 0.029110582 | 0.021733927 |
| ENSG00000183486 | 0.044739289 | 0.044349617 | 0.047811946 | 0.059667233 |
| ENSG00000142197 | 0.03485508  | 0.039531263 | 0.037161236 | 0.031722512 |
| ENSG00000108953 | 0.022362032 | 0.027496541 | 0.033567597 | 0.023994334 |
| ENSG00000139970 | 0.017738414 | 0.025538608 | 0.025402686 | 0.015392084 |
| ENSG00000168314 | 0.015749001 | 0.024718937 | 0.024914982 | 0.014771633 |
| ENSG00000180228 | 0.026697065 | 0.030408905 | 0.034339996 | 0.03042511  |
| ENSG00000183718 | 0.015640804 | 0.025280131 | 0.02543117  | 0.016734138 |
| ENSG00000147099 | 0.025400024 | 0.033584418 | 0.029551268 | 0.0293339   |
| ENSG00000123737 | 0.028821335 | 0.032648122 | 0.033257049 | 0.02535332  |
| ENSG00000171720 | 0.026884038 | 0.029243325 | 0.028567465 | 0.022178662 |
| ENSG00000165650 | 0.04290875  | 0.040530951 | 0.040591743 | 0.033463907 |
| ENSG00000186019 | 0.016646672 | 0.025459409 | 0.025325983 | 0.01712135  |
| ENSG00000122550 | 0.036418096 | 0.045227918 | 0.035318564 | 0.035236334 |
| ENSG00000157514 | 0.01945941  | 0.027967563 | 0.025990674 | 0.021645424 |
| ENSG00000160326 | 0.039262013 | 0.038644722 | 0.036994975 | 0.048343609 |
| ENSG00000188987 | 0.059006871 | 0.042055183 | 0.035380839 | 0.056872812 |
| ENSG00000164303 | 0.02251827  | 0.030968544 | 0.026182856 | 0.026768141 |
| ENSG0000004468  | 0.124077986 | 0.074646816 | 0.07263905  | 0.07652104  |
| ENSG00000067141 | 0.022510594 | 0.035540788 | 0.025632463 | 0.020159965 |
| ENSG00000180745 | 0.049365287 | 0.025749271 | 0.024636534 | 0.014953467 |
| ENSG00000160072 | 0.028972992 | 0.027801954 | 0.030089034 | 0.026147073 |
| ENSG00000099377 | 0.022659959 | 0.028322587 | 0.026159736 | 0.022294473 |
| ENSG00000100813 | 0.023868989 | 0.030648275 | 0.03424216  | 0.023693771 |
| ENSG0000004142  | 0.028668317 | 0.034238073 | 0.031619956 | 0.027180252 |
| ENSG00000203880 | 0.038247568 | 0.041865917 | 0.036042926 | 0.027109591 |
| ENSG00000214193 | 0.016508982 | 0.02555815  | 0.025901809 | 0.016870966 |
| ENSG00000166801 | 0.031651276 | 0.036323844 | 0.03370765  | 0.027132241 |
| ENSG00000132000 | 0.017145409 | 0.024913389 | 0.025066491 | 0.016149205 |
| ENSG00000047662 | 0.016331651 | 0.025374243 | 0.024664172 | 0.016418942 |
| ENSG00000163399 | 0.028099856 | 0.031105077 | 0.028982394 | 0.025872751 |
| ENSG00000102401 | 0.01500451  | 0.025775985 | 0.024694159 | 0.015466504 |
| ENSG00000178809 | 0.050211237 | 0.040618035 | 0.037302617 | 0.039260504 |
| ENSG00000116251 | 0.022337163 | 0.030562225 | 0.027439639 | 0.021507294 |
| ENSG00000243910 | 0.020381338 | 0.024858849 | 0.024533727 | 0.016107683 |
| ENSG00000197919 | 0.017683862 | 0.029205675 | 0.025596813 | 0.018935549 |
| ENSG00000138380 | 0.018747304 | 0.029722405 | 0.027161869 | 0.01707064  |
| ENSG00000164088 | 0.040443622 | 0.033781282 | 0.034846737 | 0.033032718 |
| ENSG00000165669 | 0.020128007 | 0.027999015 | 0.027067535 | 0.017725877 |
| ENSG00000135333 | 0.017651437 | 0.02501656  | 0.024591038 | 0.016697014 |
| ENSG00000122859 | 0.016285023 | 0.026352778 | 0.026290943 | 0.01579866  |
| ENSG00000100207 | 0.018155045 | 0.025398811 | 0.027622167 | 0.015283659 |
| ENSG00000144306 | 0.01834383  | 0.026288153 | 0.025291203 | 0.017759809 |
| ENSG00000242019 | 0.018495943 | 0.027629921 | 0.026690692 | 0.017010574 |
| ENSG00000157005 | 0.017033162 | 0.024216432 | 0.025420683 | 0.01578743  |
| ENSG00000130348 | 0.04219094  | 0.039850041 | 0.034309581 | 0.028071787 |
| ENSG00000251322 | 0.016542058 | 0.025250713 | 0.025423635 | 0.015516679 |
| ENSG00000121594 | 0.047749728 | 0.042857626 | 0.039791725 | 0.047095664 |
| ENSG00000187079 | 0.016481943 | 0.024939954 | 0.024774714 | 0.017072008 |
| ENSG00000019144 | 0.015495194 | 0.025849941 | 0.025073685 | 0.016486472 |
| ENSG00000250510 | 0.016238053 | 0.026008668 | 0.025796441 | 0.015354027 |
| ENSG00000154760 | 0.019410516 | 0.02594928  | 0.02657898  | 0.018093647 |
| ENSG00000181220 | 0.023665032 | 0.037966356 | 0.040366459 | 0.026978383 |

|                 |             |             |             |             |
|-----------------|-------------|-------------|-------------|-------------|
| ENSG00000139687 | 0.07526374  | 0.085538503 | 0.06526947  | 0.064935821 |
| ENSG00000052723 | 0.020028765 | 0.028763788 | 0.02797129  | 0.018110516 |
| ENSG00000169067 | 0.022836261 | 0.032704388 | 0.028858458 | 0.027475539 |
| ENSG00000167614 | 0.014975053 | 0.025559294 | 0.024611215 | 0.014978454 |
| ENSG00000108370 | 0.016752037 | 0.025387383 | 0.025707544 | 0.014627514 |
| ENSG00000176919 | 0.015721764 | 0.025474313 | 0.025143543 | 0.015620045 |
| ENSG00000189266 | 0.023114451 | 0.031207278 | 0.030843614 | 0.021611553 |
| ENSG00000150938 | 0.06656242  | 0.047795191 | 0.043157304 | 0.045348693 |
| ENSG00000168297 | 0.038281794 | 0.041667817 | 0.04018422  | 0.033592223 |
| ENSG00000177692 | 0.015580826 | 0.026326074 | 0.025787387 | 0.016087645 |
| ENSG00000143222 | 0.021755089 | 0.02853916  | 0.027849191 | 0.017759265 |
| ENSG00000165458 | 0.029873451 | 0.031182686 | 0.032667799 | 0.031632079 |
| ENSG00000128694 | 0.040526064 | 0.049913191 | 0.036001939 | 0.036421262 |
| ENSG00000168939 | 0.015024533 | 0.025859893 | 0.025227159 | 0.015982673 |
| ENSG00000177468 | 0.016479491 | 0.037430175 | 0.025134465 | 0.021050598 |
| ENSG00000162891 | 0.01646731  | 0.0263735   | 0.026249222 | 0.017328619 |
| ENSG00000153015 | 0.032255047 | 0.035690863 | 0.030235359 | 0.024451146 |
| ENSG00000119711 | 0.033340513 | 0.038639809 | 0.038116376 | 0.030635136 |
| ENSG00000165698 | 0.026838841 | 0.029540646 | 0.030862848 | 0.024556637 |
| ENSG00000239697 | 0.060707419 | 0.061426544 | 0.046262136 | 0.054750983 |
| ENSG00000136021 | 0.037753332 | 0.039375139 | 0.040776732 | 0.04802203  |
| ENSG00000166634 | 0.018383509 | 0.028551087 | 0.026920453 | 0.018125374 |
| ENSG00000134594 | 0.048916671 | 0.040044362 | 0.036914414 | 0.030821117 |
| ENSG00000079313 | 0.023232709 | 0.036212506 | 0.045265888 | 0.029393883 |
| ENSG00000101940 | 0.021552455 | 0.028823195 | 0.031794336 | 0.020537248 |
| ENSG00000141504 | 0.02634916  | 0.030305141 | 0.034208592 | 0.024759804 |
| ENSG00000196371 | 0.071127948 | 0.064202973 | 0.060574984 | 0.067337533 |
| ENSG00000187862 | 0.027079866 | 0.028034318 | 0.027776455 | 0.024449515 |
| ENSG00000168757 | 0.01637858  | 0.024170984 | 0.024639478 | 0.015986263 |
| ENSG00000149809 | 0.046128461 | 0.040139721 | 0.031062563 | 0.036609992 |
| ENSG00000101695 | 0.019945754 | 0.029875389 | 0.027831105 | 0.019547914 |
| ENSG00000007392 | 0.044223889 | 0.043519374 | 0.044629821 | 0.03464995  |
| ENSG00000142327 | 0.025591221 | 0.028236453 | 0.03262023  | 0.024118172 |
| ENSG00000095209 | 0.041738855 | 0.037969294 | 0.042323966 | 0.034019611 |
| ENSG00000163964 | 0.023921553 | 0.030703908 | 0.030044183 | 0.027146964 |
| ENSG00000141959 | 0.026972812 | 0.033153796 | 0.031534243 | 0.026032086 |
| ENSG00000113460 | 0.026941616 | 0.029932354 | 0.032342783 | 0.029091907 |
| ENSG00000147027 | 0.015139367 | 0.025136292 | 0.025597264 | 0.015997993 |
| ENSG00000105852 | 0.031838138 | 0.027050213 | 0.025312216 | 0.016066055 |
| ENSG00000131730 | 0.016115711 | 0.025467368 | 0.024395341 | 0.016593516 |
| ENSG00000165192 | 0.016409491 | 0.025470099 | 0.024946482 | 0.015375521 |
| ENSG00000177191 | 0.019648693 | 0.029843332 | 0.026581277 | 0.017838712 |
| ENSG00000159720 | 0.030850868 | 0.035189521 | 0.036168953 | 0.035417253 |
| ENSG00000133055 | 0.042237134 | 0.051741092 | 0.042364077 | 0.031240738 |
| ENSG00000134812 | 0.01707218  | 0.025676829 | 0.024745556 | 0.01584369  |
| ENSG00000168496 | 0.038664319 | 0.031895551 | 0.035253126 | 0.036805898 |
| ENSG00000134551 | 0.014639019 | 0.025308714 | 0.024362518 | 0.015589668 |
| ENSG00000159210 | 0.027209178 | 0.032433403 | 0.030036341 | 0.025199878 |
| ENSG00000094975 | 0.0163841   | 0.024178276 | 0.025302727 | 0.015584736 |
| ENSG00000158711 | 0.063997408 | 0.064770735 | 0.066528199 | 0.065599495 |
| ENSG00000169752 | 0.088004458 | 0.040180133 | 0.031049403 | 0.044526203 |
| ENSG00000147596 | 0.018030617 | 0.026616215 | 0.02874135  | 0.015560022 |
| ENSG00000138785 | 0.023739899 | 0.032434817 | 0.033582217 | 0.021212122 |
| ENSG00000166569 | 0.015320802 | 0.02525036  | 0.02536123  | 0.015488153 |



|                 |             |             |             |             |
|-----------------|-------------|-------------|-------------|-------------|
| ENSG00000144048 | 0.029268294 | 0.031721255 | 0.035502846 | 0.024271431 |
| ENSG00000107249 | 0.017514596 | 0.02528888  | 0.02435975  | 0.015916224 |
| ENSG00000175294 | 0.018756183 | 0.027264284 | 0.026845403 | 0.019927956 |
| ENSG00000176472 | 0.01560423  | 0.024495266 | 0.025068472 | 0.015452459 |
| ENSG0000006831  | 0.024321213 | 0.031346568 | 0.029446872 | 0.01953893  |
| ENSG00000078295 | 0.015439072 | 0.025511465 | 0.024563398 | 0.015157507 |
| ENSG00000101347 | 0.019290559 | 0.028774934 | 0.027153444 | 0.017504742 |
| ENSG00000163599 | 0.016799366 | 0.027647372 | 0.026348919 | 0.017800772 |
| ENSG00000244687 | 0.022853405 | 0.030657118 | 0.029697192 | 0.019928843 |
| ENSG00000188069 | 0.01675212  | 0.026311704 | 0.025583388 | 0.01776294  |
| ENSG00000116209 | 0.029310137 | 0.031983598 | 0.032142367 | 0.020184336 |
| ENSG00000152583 | 0.016361153 | 0.024335431 | 0.024770426 | 0.015255626 |
| ENSG00000162222 | 0.027937441 | 0.034994744 | 0.032319926 | 0.023729128 |
| ENSG00000153902 | 0.015828056 | 0.025948278 | 0.02488074  | 0.016274379 |
| ENSG00000143256 | 0.022751228 | 0.028162164 | 0.028131699 | 0.024769194 |
| ENSG00000171488 | 0.079974237 | 0.065161719 | 0.072335629 | 0.068949808 |
| ENSG00000106603 | 0.037471342 | 0.032908671 | 0.037023363 | 0.035521499 |
| ENSG00000133422 | 0.036368469 | 0.041059947 | 0.034650872 | 0.029663046 |
| ENSG00000119048 | 0.025572412 | 0.032037329 | 0.032395072 | 0.024876234 |
| ENSG00000049656 | 0.035675565 | 0.038697547 | 0.038822487 | 0.041645955 |
| ENSG00000115268 | 0.0356334   | 0.036966007 | 0.031423553 | 0.03540348  |
| ENSG00000186965 | 0.01500698  | 0.024486507 | 0.024672186 | 0.015341859 |
| ENSG00000105523 | 0.016669755 | 0.024874428 | 0.024444485 | 0.016350051 |
| ENSG00000181026 | 0.030494847 | 0.043340398 | 0.045842437 | 0.036810978 |
| ENSG00000187140 | 0.016812134 | 0.026056192 | 0.025459239 | 0.01671178  |
| ENSG00000123496 | 0.015102604 | 0.02476649  | 0.025819216 | 0.01514155  |
| ENSG00000139146 | 0.027525488 | 0.03174131  | 0.030924804 | 0.026771719 |
| ENSG00000135387 | 0.015813586 | 0.025561752 | 0.025335377 | 0.016467833 |
| ENSG00000137101 | 0.045258188 | 0.036856502 | 0.039459746 | 0.045820569 |
| ENSG00000160201 | 0.023628658 | 0.028945339 | 0.028554583 | 0.023125018 |
| ENSG00000170419 | 0.015921064 | 0.024795896 | 0.024856737 | 0.015967606 |
| ENSG00000164949 | 0.019030067 | 0.02522333  | 0.024912949 | 0.017969302 |
| ENSG00000182022 | 0.047806002 | 0.051937565 | 0.057124012 | 0.060372655 |
| ENSG00000169777 | 0.014869968 | 0.024182462 | 0.025689363 | 0.014896924 |
| ENSG00000112031 | 0.026272238 | 0.033348864 | 0.035316054 | 0.028810308 |
| ENSG00000168003 | 0.047473556 | 0.043931202 | 0.052037635 | 0.037356204 |
| ENSG00000079335 | 0.018132365 | 0.026752783 | 0.027340595 | 0.018711569 |
| ENSG00000141698 | 0.048604173 | 0.046723721 | 0.049881434 | 0.038946243 |
| ENSG00000142494 | 0.110877961 | 0.080944525 | 0.082046174 | 0.079554115 |
| ENSG00000141497 | 0.015692416 | 0.025512016 | 0.0241707   | 0.015236804 |
| ENSG00000142484 | 0.01664552  | 0.026028582 | 0.025026715 | 0.016044232 |
| ENSG00000113209 | 0.015673703 | 0.024169355 | 0.024601305 | 0.014829289 |
| ENSG00000239789 | 0.027848406 | 0.030246073 | 0.030164384 | 0.024414578 |
| ENSG00000162783 | 0.025161118 | 0.030824935 | 0.03285943  | 0.025983479 |
| ENSG00000114771 | 0.014601696 | 0.024371889 | 0.025768134 | 0.015216904 |
| ENSG00000101132 | 0.031942078 | 0.033873033 | 0.028717601 | 0.030726931 |
| ENSG00000103187 | 0.04703748  | 0.036187983 | 0.035728611 | 0.040228052 |
| ENSG00000198026 | 0.02379985  | 0.029319509 | 0.028529659 | 0.020085102 |
| ENSG00000078061 | 0.022786909 | 0.029508108 | 0.036048162 | 0.022752226 |
| ENSG00000158315 | 0.016735189 | 0.025874102 | 0.025138092 | 0.016459523 |
| ENSG00000163820 | 0.038949047 | 0.03636021  | 0.031569697 | 0.029396758 |
| ENSG00000241106 | 0.062471469 | 0.05868827  | 0.053908854 | 0.067536937 |
| ENSG00000075790 | 0.035103649 | 0.039138934 | 0.039380847 | 0.034320162 |
| ENSG00000152818 | 0.016743342 | 0.026270512 | 0.026192273 | 0.016173911 |

|                 |             |             |             |             |
|-----------------|-------------|-------------|-------------|-------------|
| ENSG0000015475  | 0.039112633 | 0.043895418 | 0.047054956 | 0.048738715 |
| ENSG00000117411 | 0.037295962 | 0.033582371 | 0.039160389 | 0.028601297 |
| ENSG00000119638 | 0.025235601 | 0.032077691 | 0.028304365 | 0.027529565 |
| ENSG00000128610 | 0.014849261 | 0.023964613 | 0.023960934 | 0.014631061 |
| ENSG00000138813 | 0.017851428 | 0.0257161   | 0.026663707 | 0.017997323 |
| ENSG00000065559 | 0.029693125 | 0.033739513 | 0.034762889 | 0.022976664 |
| ENSG00000089248 | 0.03350145  | 0.031795708 | 0.034424381 | 0.029842413 |
| ENSG00000101197 | 0.108576649 | 0.094573457 | 0.068724201 | 0.054424919 |
| ENSG00000123144 | 0.018967723 | 0.026109579 | 0.031298527 | 0.020654428 |
| ENSG00000170523 | 0.01987916  | 0.027318084 | 0.025420579 | 0.017238027 |
| ENSG00000153914 | 0.036279549 | 0.03918227  | 0.033451746 | 0.032375987 |
| ENSG00000169504 | 0.037646322 | 0.036409696 | 0.033317713 | 0.041185112 |
| ENSG00000162069 | 0.025551303 | 0.038502606 | 0.033182534 | 0.033066052 |
| ENSG00000076108 | 0.016564324 | 0.025430648 | 0.025989861 | 0.015794649 |
| ENSG00000204304 | 0.023875728 | 0.029465253 | 0.030822485 | 0.024703673 |
| ENSG00000197070 | 0.028232215 | 0.037002905 | 0.040076145 | 0.031239294 |
| ENSG00000127526 | 0.024460375 | 0.028999273 | 0.030492672 | 0.028042517 |
| ENSG00000143353 | 0.032146354 | 0.034978503 | 0.030158782 | 0.028549003 |
| ENSG00000186960 | 0.025850569 | 0.023655092 | 0.023639175 | 0.01307655  |
| ENSG00000103253 | 0.062299945 | 0.048213324 | 0.064649794 | 0.064128688 |
| ENSG00000138767 | 0.017571721 | 0.025737221 | 0.025484236 | 0.016466538 |
| ENSG00000184292 | 0.019103175 | 0.027749238 | 0.025735447 | 0.017193991 |
| ENSG00000108798 | 0.037434053 | 0.037152156 | 0.035737978 | 0.036284461 |
| ENSG00000100242 | 0.020631933 | 0.027039207 | 0.026078313 | 0.017774377 |
| ENSG00000182568 | 0.023642585 | 0.084260324 | 0.068297095 | 0.074523672 |
| ENSG00000204516 | 0.037425596 | 0.042996543 | 0.041199981 | 0.028346904 |
| ENSG00000221867 | 0.016451107 | 0.025693322 | 0.025132263 | 0.014691635 |
| ENSG00000178105 | 0.026652221 | 0.034920217 | 0.032995425 | 0.021476129 |
| ENSG00000203756 | 0.072864364 | 0.029946193 | 0.027257185 | 0.037800326 |
| ENSG00000037757 | 0.032263148 | 0.032562951 | 0.03238341  | 0.025696573 |
| ENSG00000172377 | 0.015305045 | 0.02424744  | 0.025309613 | 0.015412295 |
| ENSG00000215193 | 0.027944234 | 0.031329394 | 0.029934171 | 0.028194402 |
| ENSG00000165118 | 0.038452434 | 0.041959411 | 0.039763081 | 0.03115713  |
| ENSG00000169062 | 0.031585166 | 0.037693784 | 0.036301094 | 0.024013071 |
| ENSG00000117640 | 0.021908722 | 0.028585302 | 0.031670409 | 0.021889996 |
| ENSG00000161929 | 0.057112296 | 0.058326195 | 0.058795183 | 0.061590039 |
| ENSG00000181790 | 0.016605559 | 0.026670706 | 0.026288546 | 0.01799919  |
| ENSG00000166387 | 0.036881956 | 0.038634247 | 0.034475893 | 0.031273389 |
| ENSG00000148308 | 0.0260606   | 0.032809397 | 0.032090496 | 0.021447258 |
| ENSG00000161850 | 0.018722447 | 0.026339664 | 0.026982014 | 0.016825016 |
| ENSG00000166670 | 0.016334503 | 0.025223057 | 0.024737319 | 0.014566375 |
| ENSG00000168386 | 0.069603873 | 0.073536196 | 0.053608528 | 0.048685856 |
| ENSG00000172367 | 0.02457269  | 0.032678365 | 0.027764764 | 0.023808901 |
| ENSG00000186767 | 0.015975875 | 0.025111924 | 0.024293223 | 0.014536343 |
| ENSG00000154175 | 0.016214166 | 0.027670865 | 0.026080094 | 0.017479506 |
| ENSG00000175309 | 0.023168387 | 0.030752481 | 0.031621557 | 0.035513292 |
| ENSG00000124374 | 0.034495866 | 0.037183758 | 0.030702124 | 0.031276253 |
| ENSG00000214435 | 0.082839969 | 0.079438033 | 0.057469276 | 0.07453483  |
| ENSG00000173473 | 0.0227267   | 0.031869108 | 0.029260793 | 0.020876906 |
| ENSG00000140307 | 0.020978045 | 0.02937284  | 0.030285995 | 0.02150825  |
| ENSG00000102683 | 0.017904904 | 0.026719734 | 0.026119886 | 0.01800842  |
| ENSG00000196792 | 0.029874102 | 0.036817124 | 0.031621408 | 0.031844015 |
| ENSG00000138688 | 0.034046211 | 0.037918209 | 0.033591901 | 0.03249639  |
| ENSG00000198513 | 0.019248163 | 0.025573129 | 0.025385261 | 0.019065801 |

|                 |             |             |             |             |
|-----------------|-------------|-------------|-------------|-------------|
| ENSG00000144867 | 0.032632967 | 0.040256613 | 0.046304428 | 0.038532562 |
| ENSG00000089006 | 0.040920574 | 0.047417427 | 0.037205852 | 0.048518103 |
| ENSG00000176774 | 0.021063819 | 0.025612358 | 0.024973933 | 0.019829093 |
| ENSG00000157933 | 0.017231179 | 0.025633705 | 0.02559284  | 0.015119153 |
| ENSG00000175787 | 0.015201237 | 0.026704602 | 0.024621276 | 0.014608607 |
| ENSG00000164508 | 0.014910126 | 0.025199277 | 0.026452885 | 0.015225247 |
| ENSG00000091137 | 0.033072656 | 0.032023593 | 0.035926254 | 0.026723114 |
| ENSG00000136488 | 0.015127923 | 0.025432404 | 0.025448481 | 0.014630174 |
| ENSG00000119397 | 0.035843923 | 0.040543897 | 0.03241629  | 0.027863025 |
| ENSG00000156469 | 0.039222701 | 0.043052026 | 0.038695613 | 0.027167842 |
| ENSG00000154767 | 0.032198175 | 0.036469151 | 0.035184872 | 0.025200418 |
| ENSG0000008130  | 0.025999844 | 0.032946055 | 0.030023535 | 0.0281803   |
| ENSG00000105186 | 0.028486625 | 0.034522777 | 0.030973307 | 0.02602995  |
| ENSG00000153993 | 0.014908395 | 0.024885363 | 0.024697981 | 0.014605108 |
| ENSG00000205309 | 0.045856725 | 0.040887108 | 0.041500504 | 0.042394028 |
| ENSG00000170950 | 0.015031142 | 0.024740063 | 0.025188426 | 0.015205613 |
| ENSG00000198612 | 0.019901358 | 0.025716938 | 0.025126492 | 0.017811057 |
| ENSG00000184185 | 0.017606217 | 0.027676653 | 0.027224706 | 0.017710213 |
| ENSG00000110047 | 0.035397339 | 0.032463122 | 0.035654886 | 0.030276395 |
| ENSG00000154237 | 0.054076012 | 0.042999377 | 0.035338922 | 0.078410195 |
| ENSG00000140451 | 0.021737779 | 0.025959687 | 0.025938658 | 0.019280879 |
| ENSG00000243811 | 0.017028971 | 0.025667564 | 0.026528861 | 0.01590795  |
| ENSG00000126262 | 0.026031775 | 0.030426515 | 0.029989139 | 0.032259123 |
| ENSG00000115170 | 0.096703611 | 0.067315496 | 0.054167245 | 0.058902657 |
| ENSG00000175467 | 0.022443793 | 0.029030966 | 0.030787578 | 0.0250496   |
| ENSG00000204420 | 0.015499614 | 0.024757147 | 0.025966994 | 0.016133027 |
| ENSG00000166167 | 0.016963491 | 0.026008436 | 0.026620643 | 0.016860961 |
| ENSG00000137331 | 0.060402176 | 0.046332484 | 0.061202848 | 0.050559733 |
| ENSG00000232810 | 0.049677113 | 0.049099698 | 0.047341651 | 0.047281714 |
| ENSG00000100983 | 0.030375937 | 0.03330346  | 0.029852061 | 0.021735314 |
| ENSG00000124357 | 0.040532853 | 0.039211662 | 0.034212128 | 0.039331928 |
| ENSG00000186562 | 0.016450944 | 0.025488063 | 0.025819926 | 0.015454727 |
| ENSG00000146263 | 0.03758874  | 0.043972585 | 0.035566556 | 0.030029734 |
| ENSG00000062524 | 0.026158082 | 0.0425642   | 0.030678289 | 0.019940545 |
| ENSG00000198853 | 0.016121237 | 0.026321512 | 0.024944541 | 0.016360132 |
| ENSG00000169550 | 0.017480973 | 0.026650081 | 0.024714229 | 0.015515208 |
| ENSG00000177426 | 0.017834751 | 0.025192794 | 0.025556074 | 0.016709852 |
| ENSG00000162877 | 0.01560693  | 0.026048194 | 0.025716571 | 0.017054391 |
| ENSG00000110931 | 0.059402035 | 0.061125571 | 0.054319957 | 0.052763923 |
| ENSG00000181827 | 0.034398293 | 0.039216662 | 0.029999449 | 0.028407754 |
| ENSG00000167751 | 0.017994706 | 0.027726858 | 0.026540029 | 0.021021979 |
| ENSG00000181722 | 0.06202068  | 0.058541322 | 0.038099878 | 0.04559534  |
| ENSG00000101266 | 0.022226332 | 0.030712435 | 0.029518771 | 0.02096595  |
| ENSG00000188859 | 0.03214969  | 0.032073511 | 0.033105261 | 0.030291461 |
| ENSG00000132589 | 0.059479763 | 0.051710569 | 0.047158841 | 0.049680696 |
| ENSG00000140623 | 0.017079796 | 0.024360387 | 0.02481814  | 0.015240346 |
| ENSG00000151320 | 0.028895333 | 0.026002469 | 0.024400484 | 0.020387649 |
| ENSG00000040487 | 0.015283242 | 0.025602633 | 0.025551477 | 0.015134735 |
| ENSG00000077713 | 0.038795046 | 0.039544064 | 0.031694815 | 0.038739809 |
| ENSG00000115540 | 0.016326276 | 0.025277028 | 0.024946249 | 0.015507763 |
| ENSG00000164690 | 0.01643028  | 0.024424558 | 0.024278861 | 0.01522449  |
| ENSG00000054796 | 0.014862134 | 0.02441954  | 0.025437197 | 0.015335595 |
| ENSG00000164405 | 0.022918996 | 0.029631151 | 0.027153505 | 0.021519753 |
| ENSG00000151967 | 0.098735654 | 0.073356249 | 0.069729083 | 0.066502948 |

|                 |             |             |             |             |
|-----------------|-------------|-------------|-------------|-------------|
| ENSG00000146411 | 0.018439118 | 0.029014048 | 0.02576275  | 0.02113715  |
| ENSG00000153347 | 0.017014622 | 0.025599618 | 0.026005467 | 0.016428043 |
| ENSG00000142538 | 0.019229848 | 0.03007159  | 0.024275183 | 0.015640175 |
| ENSG00000162302 | 0.037363198 | 0.041315798 | 0.03307274  | 0.034425007 |
| ENSG00000162757 | 0.032786629 | 0.0356479   | 0.033240664 | 0.023545616 |
| ENSG00000064199 | 0.037883304 | 0.043394271 | 0.045371756 | 0.044832992 |
| ENSG00000166337 | 0.019477031 | 0.026048063 | 0.027438774 | 0.022309289 |
| ENSG00000063180 | 0.026257774 | 0.029774434 | 0.033015238 | 0.030877539 |
| ENSG00000187609 | 0.024681855 | 0.028465307 | 0.033231456 | 0.023338035 |
| ENSG00000198286 | 0.042377166 | 0.043582021 | 0.039811041 | 0.036987272 |
| ENSG00000003402 | 0.036586222 | 0.034768565 | 0.034686556 | 0.032050565 |
| ENSG00000103175 | 0.016817897 | 0.024606181 | 0.025093286 | 0.016921493 |
| ENSG00000182346 | 0.016431097 | 0.024700383 | 0.025082519 | 0.0169375   |
| ENSG00000173421 | 0.015576861 | 0.026365226 | 0.025774018 | 0.015474496 |
| ENSG00000163590 | 0.017522094 | 0.024709145 | 0.025187527 | 0.015676542 |
| ENSG00000010270 | 0.032973632 | 0.036565074 | 0.03382627  | 0.033943393 |
| ENSG00000139209 | 0.020176909 | 0.026660882 | 0.025475792 | 0.016155598 |
| ENSG00000182742 | 0.061776787 | 0.051982872 | 0.044863793 | 0.057049691 |
| ENSG00000172016 | 0.013990595 | 0.024746831 | 0.024685956 | 0.014859666 |
| ENSG00000169271 | 0.018825276 | 0.026319197 | 0.026323055 | 0.015815775 |
| ENSG00000111602 | 0.042662145 | 0.043360872 | 0.033856785 | 0.035724239 |
| ENSG00000153446 | 0.016232482 | 0.025504814 | 0.024660348 | 0.015618975 |
| ENSG00000198646 | 0.025232589 | 0.035285497 | 0.028025865 | 0.026335048 |
| ENSG00000100376 | 0.071592125 | 0.086008339 | 0.065150247 | 0.063713026 |
| ENSG00000204576 | 0.03354959  | 0.035970435 | 0.035503557 | 0.031366853 |
| ENSG00000196159 | 0.015997973 | 0.026406177 | 0.025537143 | 0.01511671  |
| ENSG00000168675 | 0.051298109 | 0.054532565 | 0.049549473 | 0.052276215 |
| ENSG00000183609 | 0.015950885 | 0.025123285 | 0.025197904 | 0.015961131 |
| ENSG00000065357 | 0.016023717 | 0.025134094 | 0.02454543  | 0.014472473 |
| ENSG00000171603 | 0.031858488 | 0.031418172 | 0.033682318 | 0.025544667 |
| ENSG00000105865 | 0.03151304  | 0.033239953 | 0.031850096 | 0.02461972  |
| ENSG00000079246 | 0.023697406 | 0.029925564 | 0.029206779 | 0.021548298 |
| ENSG00000132259 | 0.018892842 | 0.026612395 | 0.027247858 | 0.015928217 |
| ENSG00000179431 | 0.060883871 | 0.048242201 | 0.056556866 | 0.061765478 |
| ENSG00000205944 | 0.015616279 | 0.024335954 | 0.025277799 | 0.014329836 |
| ENSG00000156521 | 0.037362326 | 0.038454381 | 0.039986725 | 0.027883514 |
| ENSG00000231887 | 0.01889594  | 0.029199018 | 0.030849008 | 0.018309654 |
| ENSG00000177879 | 0.033739944 | 0.031946347 | 0.02978895  | 0.023561706 |
| ENSG00000005483 | 0.034895318 | 0.040675877 | 0.034856097 | 0.03023119  |
| ENSG00000123685 | 0.050239784 | 0.054208843 | 0.045839124 | 0.060931134 |
| ENSG00000116748 | 0.029177365 | 0.02628476  | 0.024809833 | 0.020560204 |
| ENSG00000162601 | 0.019093308 | 0.027691895 | 0.02604197  | 0.018556025 |
| ENSG00000179674 | 0.036101535 | 0.030456627 | 0.027144969 | 0.018025362 |
| ENSG00000241635 | 0.017842921 | 0.0257985   | 0.025141667 | 0.019016736 |
| ENSG00000169194 | 0.052294899 | 0.03322102  | 0.028476769 | 0.027250552 |
| ENSG00000052802 | 0.024078392 | 0.033232757 | 0.031831936 | 0.021695705 |
| ENSG00000129691 | 0.028889752 | 0.033836606 | 0.03290349  | 0.022672614 |
| ENSG00000243244 | 0.039143118 | 0.035978377 | 0.039072358 | 0.044982568 |
| ENSG00000050165 | 0.014566691 | 0.025128786 | 0.02538281  | 0.01446972  |
| ENSG00000087884 | 0.039630972 | 0.039133508 | 0.042017288 | 0.02992133  |
| ENSG00000175203 | 0.02225244  | 0.027998448 | 0.028481194 | 0.021152914 |
| ENSG00000159399 | 0.064290337 | 0.072507875 | 0.066525986 | 0.060243054 |
| ENSG00000170852 | 0.039733713 | 0.044056577 | 0.036733749 | 0.034337677 |
| ENSG00000239961 | 0.080749444 | 0.07136538  | 0.038844279 | 0.043497228 |

|                 |             |             |             |             |
|-----------------|-------------|-------------|-------------|-------------|
| ENSG00000152778 | 0.045424223 | 0.051152216 | 0.045801358 | 0.039297215 |
| ENSG00000197969 | 0.034120417 | 0.041724804 | 0.034659113 | 0.033910192 |
| ENSG00000182575 | 0.019492494 | 0.028570694 | 0.02525471  | 0.018177138 |
| ENSG00000196409 | 0.042732809 | 0.043338482 | 0.041585519 | 0.036212367 |
| ENSG00000138443 | 0.028154149 | 0.032152238 | 0.031931667 | 0.023326654 |
| ENSG00000173769 | 0.014232171 | 0.023516211 | 0.024002102 | 0.012855021 |
| ENSG00000124151 | 0.020717926 | 0.030261534 | 0.028048775 | 0.024179567 |
| ENSG00000188906 | 0.022830125 | 0.026825134 | 0.027330519 | 0.018060003 |
| ENSG00000127329 | 0.018552762 | 0.02691023  | 0.025118063 | 0.017657839 |
| ENSG00000095637 | 0.057439107 | 0.064930677 | 0.030513451 | 0.034417224 |
| ENSG00000163449 | 0.028830844 | 0.031159049 | 0.026916079 | 0.022981847 |
| ENSG00000109103 | 0.043740434 | 0.044752299 | 0.043129782 | 0.042209741 |
| ENSG00000184361 | 0.0162232   | 0.025462345 | 0.025759369 | 0.015732898 |
| ENSG00000100450 | 0.030959031 | 0.031309494 | 0.029350886 | 0.057257717 |
| ENSG00000105701 | 0.027837105 | 0.037528291 | 0.042340335 | 0.036341904 |
| ENSG00000249948 | 0.044275921 | 0.027296346 | 0.025788025 | 0.016327452 |
| ENSG00000163602 | 0.041230979 | 0.041766579 | 0.042980136 | 0.065842473 |
| ENSG00000048052 | 0.072651665 | 0.066795014 | 0.055131345 | 0.057216228 |
| ENSG00000157216 | 0.051574125 | 0.049461166 | 0.048730536 | 0.057570345 |
| ENSG00000062282 | 0.039357717 | 0.034342883 | 0.03529534  | 0.033858461 |
| ENSG00000196155 | 0.017490351 | 0.027905092 | 0.027295383 | 0.020485602 |
| ENSG00000142871 | 0.015625444 | 0.024713662 | 0.024812453 | 0.016048332 |
| ENSG00000006468 | 0.02076132  | 0.025835943 | 0.028554566 | 0.017658623 |
| ENSG00000102174 | 0.020399254 | 0.027161381 | 0.028262217 | 0.01805601  |
| ENSG00000175130 | 0.042992221 | 0.047612393 | 0.051489119 | 0.05107237  |
| ENSG00000142539 | 0.047380704 | 0.039967043 | 0.041893777 | 0.060444566 |
| ENSG00000114654 | 0.017449434 | 0.028124411 | 0.026377148 | 0.015789766 |
| ENSG00000115486 | 0.021308129 | 0.028688707 | 0.027866072 | 0.01928293  |
| ENSG00000100479 | 0.050681292 | 0.045635536 | 0.037703416 | 0.038170754 |
| ENSG00000196458 | 0.027961005 | 0.031523987 | 0.02939803  | 0.025149053 |
| ENSG00000249124 | 0.027805432 | 0.028566031 | 0.028602765 | 0.023670958 |
| ENSG00000117477 | 0.017789308 | 0.025512491 | 0.024825266 | 0.015875099 |
| ENSG00000133135 | 0.016435953 | 0.024939333 | 0.025009123 | 0.014826369 |
| ENSG00000178372 | 0.018096121 | 0.024456128 | 0.025868586 | 0.016516261 |
| ENSG00000171496 | 0.016240973 | 0.024692834 | 0.025779627 | 0.016076224 |
| ENSG00000183117 | 0.016258072 | 0.024098851 | 0.023806738 | 0.015829944 |
| ENSG00000164794 | 0.064001435 | 0.030801301 | 0.030302107 | 0.035489753 |
| ENSG00000168564 | 0.036156991 | 0.044105081 | 0.041827906 | 0.046886797 |
| ENSG00000127529 | 0.01631563  | 0.024338551 | 0.024702134 | 0.015591809 |
| ENSG00000086102 | 0.025864464 | 0.03021361  | 0.030922075 | 0.0218995   |
| ENSG00000140455 | 0.031830023 | 0.03032434  | 0.0344939   | 0.024077941 |
| ENSG00000136159 | 0.027671454 | 0.031382788 | 0.032074473 | 0.027052352 |
| ENSG00000188089 | 0.014464689 | 0.024096279 | 0.024162966 | 0.013176876 |
| ENSG00000123594 | 0.016558329 | 0.026034392 | 0.025043228 | 0.01708503  |
| ENSG00000120029 | 0.034275314 | 0.033976478 | 0.03037124  | 0.025441835 |
| ENSG00000136161 | 0.056809086 | 0.059403719 | 0.049057028 | 0.056298662 |
| ENSG00000141956 | 0.070789187 | 0.057835666 | 0.058009036 | 0.070360636 |
| ENSG00000153922 | 0.027624326 | 0.039266716 | 0.042149901 | 0.031216729 |
| ENSG00000120332 | 0.03333198  | 0.02732936  | 0.026625139 | 0.024250144 |
| ENSG00000170561 | 0.014513756 | 0.024386913 | 0.024591151 | 0.015702394 |
| ENSG00000075673 | 0.01597935  | 0.024126426 | 0.025034792 | 0.016047981 |
| ENSG00000114405 | 0.161724225 | 0.097689612 | 0.057241137 | 0.090934993 |
| ENSG00000137628 | 0.078257156 | 0.065422812 | 0.050056999 | 0.065214664 |
| ENSG00000184661 | 0.050311472 | 0.036716011 | 0.044234503 | 0.039719101 |

|                 |             |             |             |             |
|-----------------|-------------|-------------|-------------|-------------|
| ENSG00000189420 | 0.0162363   | 0.02473039  | 0.024504286 | 0.014144249 |
| ENSG00000085265 | 0.041736595 | 0.030254841 | 0.035097317 | 0.029635526 |
| ENSG00000081052 | 0.066202399 | 0.077906007 | 0.057988012 | 0.076368312 |
| ENSG00000166211 | 0.019582386 | 0.02552221  | 0.026383523 | 0.015446517 |
| ENSG00000134757 | 0.018426241 | 0.025220041 | 0.02565095  | 0.01534033  |
| ENSG00000100379 | 0.018154338 | 0.02789622  | 0.026197829 | 0.017071241 |
| ENSG00000183625 | 0.01688182  | 0.024532757 | 0.025593985 | 0.015822317 |
| ENSG00000241127 | 0.027446197 | 0.033597101 | 0.034781375 | 0.024248495 |
| ENSG00000050628 | 0.018209767 | 0.025721036 | 0.025613092 | 0.020048039 |
| ENSG00000054523 | 0.017520839 | 0.02531172  | 0.025235065 | 0.018473584 |
| ENSG00000185615 | 0.015431811 | 0.024677571 | 0.024725258 | 0.015570765 |
| ENSG00000173572 | 0.015663719 | 0.026023546 | 0.024395352 | 0.015545928 |
| ENSG00000130714 | 0.028668973 | 0.035503206 | 0.0339526   | 0.024910017 |
| ENSG00000155846 | 0.033162355 | 0.037278094 | 0.043219877 | 0.035824939 |
| ENSG00000241563 | 0.017495818 | 0.02576971  | 0.02450342  | 0.0157146   |
| ENSG00000186628 | 0.020994052 | 0.027305761 | 0.025822795 | 0.021475116 |
| ENSG00000134516 | 0.023458821 | 0.032598436 | 0.028987698 | 0.019260976 |
| ENSG00000168274 | 0.049480293 | 0.047904327 | 0.04721569  | 0.042735974 |
| ENSG00000110721 | 0.045294275 | 0.036474626 | 0.042404717 | 0.033934903 |
| ENSG00000065154 | 0.10792969  | 0.067426306 | 0.055842575 | 0.083959723 |
| ENSG00000178826 | 0.016030866 | 0.024820217 | 0.024594774 | 0.01630419  |
| ENSG00000177098 | 0.028363202 | 0.030551724 | 0.033411624 | 0.031940212 |
| ENSG00000080709 | 0.036488873 | 0.033495622 | 0.034048657 | 0.032469741 |
| ENSG00000173039 | 0.02357679  | 0.035362078 | 0.042763192 | 0.024300474 |
| ENSG00000140829 | 0.025083921 | 0.031626226 | 0.031974357 | 0.023767606 |
| ENSG00000125755 | 0.030723786 | 0.04567073  | 0.045565654 | 0.040911959 |
| ENSG00000138109 | 0.015568343 | 0.024458721 | 0.024872101 | 0.015791411 |
| ENSG00000081019 | 0.030232108 | 0.040088298 | 0.037833092 | 0.03136802  |
| ENSG00000165512 | 0.034744299 | 0.036405229 | 0.036461303 | 0.026694563 |
| ENSG00000115904 | 0.029869215 | 0.036837695 | 0.035246542 | 0.039921516 |
| ENSG00000176046 | 0.018062526 | 0.026032882 | 0.025940876 | 0.016260063 |
| ENSG00000043462 | 0.053096952 | 0.048636037 | 0.049002261 | 0.056217062 |
| ENSG00000115963 | 0.104515045 | 0.074328818 | 0.034315388 | 0.045700782 |
| ENSG00000160199 | 0.015585945 | 0.024785863 | 0.024860933 | 0.014882474 |
| ENSG00000081138 | 0.015855027 | 0.024296482 | 0.024250079 | 0.015274154 |
| ENSG00000165516 | 0.0284152   | 0.032268901 | 0.0327798   | 0.025169833 |
| ENSG00000141378 | 0.022838303 | 0.032294762 | 0.03530333  | 0.023798674 |
| ENSG00000121898 | 0.036338031 | 0.025804097 | 0.025207494 | 0.022056613 |
| ENSG00000099337 | 0.057019552 | 0.050608202 | 0.053638686 | 0.060721129 |
| ENSG00000090376 | 0.090622613 | 0.06653202  | 0.063585667 | 0.06827838  |
| ENSG00000106993 | 0.025145864 | 0.034529655 | 0.036250708 | 0.026605264 |
| ENSG00000005073 | 0.016531524 | 0.024992272 | 0.025926318 | 0.016942607 |
| ENSG00000197689 | 0.014885574 | 0.024750244 | 0.025100115 | 0.015449773 |
| ENSG00000120242 | 0.020537925 | 0.027696666 | 0.029334406 | 0.017752813 |
| ENSG00000174130 | 0.048057823 | 0.058344712 | 0.054432728 | 0.035224215 |
| ENSG00000100056 | 0.02254463  | 0.028145004 | 0.033534614 | 0.022680817 |
| ENSG00000184779 | 0.018587926 | 0.025214564 | 0.025641349 | 0.017108213 |
| ENSG00000100300 | 0.058789848 | 0.043188137 | 0.039170465 | 0.0470449   |
| ENSG00000134873 | 0.015632947 | 0.024657349 | 0.024500049 | 0.016102453 |
| ENSG00000145439 | 0.044270377 | 0.039903407 | 0.034129365 | 0.040249987 |
| ENSG00000134215 | 0.046965634 | 0.025749402 | 0.024564102 | 0.016527645 |
| ENSG00000196363 | 0.03854463  | 0.039093511 | 0.035355779 | 0.030604148 |
| ENSG00000116863 | 0.029324498 | 0.032598278 | 0.031719756 | 0.021678619 |
| ENSG00000205707 | 0.027226096 | 0.029744992 | 0.03529887  | 0.02837006  |

|                 |             |             |             |             |
|-----------------|-------------|-------------|-------------|-------------|
| ENSG0000073009  | 0.027386272 | 0.036646011 | 0.034006063 | 0.025652148 |
| ENSG00000117533 | 0.038890832 | 0.036313748 | 0.040788409 | 0.036485854 |
| ENSG00000163283 | 0.042399692 | 0.039979389 | 0.040474684 | 0.045182459 |
| ENSG00000096433 | 0.044752785 | 0.037182195 | 0.033437861 | 0.029681214 |
| ENSG00000104327 | 0.018256648 | 0.027010541 | 0.026361728 | 0.015922256 |
| ENSG00000157388 | 0.016436001 | 0.024646202 | 0.02440631  | 0.01488639  |
| ENSG00000148300 | 0.024553176 | 0.027994337 | 0.029580015 | 0.026991655 |
| ENSG00000214367 | 0.036243893 | 0.036919249 | 0.029328057 | 0.031736864 |
| ENSG00000156050 | 0.014571422 | 0.024937547 | 0.024647497 | 0.015905534 |
| ENSG00000188419 | 0.018197508 | 0.03302964  | 0.026178861 | 0.017707878 |
| ENSG00000006114 | 0.032016273 | 0.034266935 | 0.034086091 | 0.026852856 |
| ENSG00000142784 | 0.026613449 | 0.031785342 | 0.036670159 | 0.030169353 |
| ENSG00000078124 | 0.027085504 | 0.032507284 | 0.032147094 | 0.026462066 |
| ENSG00000150403 | 0.031087934 | 0.041344272 | 0.034474164 | 0.034163282 |
| ENSG00000128881 | 0.015627712 | 0.026006779 | 0.02568749  | 0.016387989 |
| ENSG00000142235 | 0.04938564  | 0.062977526 | 0.062100418 | 0.053264434 |
| ENSG00000164291 | 0.020420052 | 0.026552002 | 0.026113025 | 0.019558059 |
| ENSG00000156675 | 0.055021283 | 0.048221426 | 0.05075909  | 0.049461339 |
| ENSG00000196176 | 0.028259105 | 0.027961519 | 0.032669958 | 0.029964446 |
| ENSG00000078725 | 0.017615753 | 0.02520836  | 0.026728947 | 0.015751357 |
| ENSG00000146109 | 0.019678114 | 0.025573571 | 0.025480187 | 0.016799435 |
| ENSG00000169946 | 0.037238814 | 0.033637075 | 0.030171992 | 0.030809548 |
| ENSG00000118245 | 0.016548253 | 0.025501248 | 0.024823761 | 0.015119769 |
| ENSG00000173545 | 0.022539309 | 0.031080594 | 0.03463313  | 0.020413931 |
| ENSG00000135966 | 0.032125085 | 0.035876229 | 0.038479386 | 0.033815795 |
| ENSG00000138944 | 0.017255869 | 0.025139848 | 0.025819391 | 0.016415598 |
| ENSG00000213599 | 0.017153293 | 0.025178494 | 0.024400493 | 0.017066635 |
| ENSG00000169006 | 0.016895087 | 0.024344855 | 0.025213983 | 0.015949293 |
| ENSG00000089041 | 0.022748784 | 0.02779483  | 0.02936071  | 0.020904993 |
| ENSG00000144791 | 0.040510731 | 0.045575606 | 0.037629967 | 0.036010117 |
| ENSG00000234511 | 0.015760346 | 0.02632022  | 0.024481788 | 0.014959628 |
| ENSG00000155189 | 0.032385655 | 0.034720385 | 0.031097076 | 0.035934437 |
| ENSG00000080573 | 0.047281826 | 0.038313639 | 0.028359374 | 0.037060529 |
| ENSG00000130751 | 0.023957037 | 0.026814659 | 0.027584084 | 0.021736328 |
| ENSG00000145362 | 0.019569842 | 0.02524124  | 0.026788245 | 0.015957985 |
| ENSG00000151079 | 0.017871185 | 0.025061346 | 0.024964348 | 0.014726625 |
| ENSG00000135898 | 0.067261173 | 0.042255755 | 0.046618351 | 0.062309453 |
| ENSG00000183060 | 0.042850611 | 0.042124241 | 0.038852083 | 0.041519968 |
| ENSG00000117595 | 0.023549622 | 0.027252299 | 0.026612233 | 0.016997653 |
| ENSG00000132938 | 0.016721069 | 0.025340805 | 0.024747875 | 0.014856479 |
| ENSG00000174332 | 0.014855405 | 0.025606561 | 0.024602734 | 0.015944542 |
| ENSG00000100557 | 0.120732921 | 0.081936098 | 0.081420899 | 0.102459354 |
| ENSG00000176142 | 0.034153521 | 0.035823511 | 0.035633183 | 0.036849856 |
| ENSG00000141759 | 0.019182334 | 0.025783667 | 0.026812074 | 0.017355603 |
| ENSG00000180979 | 0.025284047 | 0.034221922 | 0.034551739 | 0.023796406 |
| ENSG00000198892 | 0.015458452 | 0.024899748 | 0.024784263 | 0.014753007 |
| ENSG00000116785 | 0.016629686 | 0.024439573 | 0.024395322 | 0.015141196 |
| ENSG00000145012 | 0.018537849 | 0.027851219 | 0.026603786 | 0.020206301 |
| ENSG00000168671 | 0.016023419 | 0.025334937 | 0.025079276 | 0.015073383 |
| ENSG00000115112 | 0.034798086 | 0.030701349 | 0.034887882 | 0.020566062 |
| ENSG00000187238 | 0.01475296  | 0.024736767 | 0.024919794 | 0.015551248 |
| ENSG00000186191 | 0.018508804 | 0.026068525 | 0.027290147 | 0.016697514 |
| ENSG00000105639 | 0.033102542 | 0.046712894 | 0.037709508 | 0.039904366 |
| ENSG00000117862 | 0.028402808 | 0.030498523 | 0.030337887 | 0.021177439 |

|                 |             |             |             |             |
|-----------------|-------------|-------------|-------------|-------------|
| ENSG00000131408 | 0.022029809 | 0.028117609 | 0.033450246 | 0.024233619 |
| ENSG00000119919 | 0.016549737 | 0.024787221 | 0.024763282 | 0.015612995 |
| ENSG00000173480 | 0.03332916  | 0.032813453 | 0.032877383 | 0.030591897 |
| ENSG00000105851 | 0.065337051 | 0.068952273 | 0.063750473 | 0.053812347 |
| ENSG00000136908 | 0.025975937 | 0.030993239 | 0.034400402 | 0.02754123  |
| ENSG00000158296 | 0.01526837  | 0.025597279 | 0.024958473 | 0.015397873 |
| ENSG00000179087 | 0.016037665 | 0.024690253 | 0.025021497 | 0.015490843 |
| ENSG00000101181 | 0.025211012 | 0.027061376 | 0.027355678 | 0.018805666 |
| ENSG0000008086  | 0.015337817 | 0.025036509 | 0.024640788 | 0.014618996 |
| ENSG00000143207 | 0.024567846 | 0.034531865 | 0.032260138 | 0.026223874 |
| ENSG00000165861 | 0.031357017 | 0.031756936 | 0.032390736 | 0.027880933 |
| ENSG00000184384 | 0.032442381 | 0.037086753 | 0.033407269 | 0.032096527 |
| ENSG00000159200 | 0.043381074 | 0.0509169   | 0.050255813 | 0.050146663 |
| ENSG00000074803 | 0.015955965 | 0.025740017 | 0.026319322 | 0.016328197 |
| ENSG00000149657 | 0.018405588 | 0.029957175 | 0.027085588 | 0.019250094 |
| ENSG00000114378 | 0.017300448 | 0.025750136 | 0.027129758 | 0.017075581 |
| ENSG00000112499 | 0.015911632 | 0.024220008 | 0.024337883 | 0.016060509 |
| ENSG00000073146 | 0.017665278 | 0.024714586 | 0.025232105 | 0.018901147 |
| ENSG00000116459 | 0.018770625 | 0.026421805 | 0.025802291 | 0.017276819 |
| ENSG00000107669 | 0.019866034 | 0.027495258 | 0.025776103 | 0.018102291 |
| ENSG00000162894 | 0.040148944 | 0.036445725 | 0.039015323 | 0.046653761 |
| ENSG00000126233 | 0.017080384 | 0.024397194 | 0.024820964 | 0.015581486 |
| ENSG00000204604 | 0.022877537 | 0.03210897  | 0.034638803 | 0.021368578 |
| ENSG00000176386 | 0.025266745 | 0.030828104 | 0.030935446 | 0.019837066 |
| ENSG00000196152 | 0.040285351 | 0.036124464 | 0.039499345 | 0.033717294 |
| ENSG00000167619 | 0.040290069 | 0.037697146 | 0.033136427 | 0.056074791 |
| ENSG00000167264 | 0.028093376 | 0.031470678 | 0.030984155 | 0.025127723 |
| ENSG00000069345 | 0.021855713 | 0.029344839 | 0.03013815  | 0.021072395 |
| ENSG00000101773 | 0.016563814 | 0.026442009 | 0.02491389  | 0.014755284 |
| ENSG00000103184 | 0.016324501 | 0.025164443 | 0.024386494 | 0.015276088 |
| ENSG00000221978 | 0.027573104 | 0.035026271 | 0.034413702 | 0.027900228 |
| ENSG00000112299 | 0.042574647 | 0.028310218 | 0.025355903 | 0.021683302 |
| ENSG00000250722 | 0.100139503 | 0.04290266  | 0.025480203 | 0.031473278 |
| ENSG00000125885 | 0.029110497 | 0.031866655 | 0.030332243 | 0.031890788 |
| ENSG00000147256 | 0.01511329  | 0.024868867 | 0.024680714 | 0.015004024 |
| ENSG00000141255 | 0.03827411  | 0.045143811 | 0.042995699 | 0.022073136 |
| ENSG00000166143 | 0.016610116 | 0.025305089 | 0.025010398 | 0.016526543 |
| ENSG00000104880 | 0.028569181 | 0.033139704 | 0.034261518 | 0.023678506 |
| ENSG00000175906 | 0.033056135 | 0.033717567 | 0.032099941 | 0.02965399  |
| ENSG00000183134 | 0.016940588 | 0.025739628 | 0.025960657 | 0.014997913 |
| ENSG00000183251 | 0.050683926 | 0.024339939 | 0.023851296 | 0.016387589 |
| ENSG00000188257 | 0.016842986 | 0.026428721 | 0.025479948 | 0.015867442 |
| ENSG00000110680 | 0.017320389 | 0.025669695 | 0.02529297  | 0.015639721 |
| ENSG00000122406 | 0.015128393 | 0.024368325 | 0.024243991 | 0.016011026 |
| ENSG00000105642 | 0.049185624 | 0.04592218  | 0.04696675  | 0.048213566 |
| ENSG00000168228 | 0.030487616 | 0.041772942 | 0.03816159  | 0.023865628 |
| ENSG00000105514 | 0.02465364  | 0.030219007 | 0.0263115   | 0.019760177 |
| ENSG00000145386 | 0.050927878 | 0.042777671 | 0.037666353 | 0.034750529 |
| ENSG00000204683 | 0.014086385 | 0.023935736 | 0.023938071 | 0.01361177  |
| ENSG00000135677 | 0.027395519 | 0.03574855  | 0.029369794 | 0.025185559 |
| ENSG00000151332 | 0.026382876 | 0.038235325 | 0.034608874 | 0.020183497 |
| ENSG00000204308 | 0.031630177 | 0.031627507 | 0.030403007 | 0.020213283 |
| ENSG00000119616 | 0.036171382 | 0.043202646 | 0.044844271 | 0.038437637 |
| ENSG00000134186 | 0.039007081 | 0.037794057 | 0.032269372 | 0.034374588 |



|                 |             |             |             |             |
|-----------------|-------------|-------------|-------------|-------------|
| ENSG00000166435 | 0.03320708  | 0.036486197 | 0.037749545 | 0.025968086 |
| ENSG00000167094 | 0.017903621 | 0.025009586 | 0.025383488 | 0.016108663 |
| ENSG00000186466 | 0.016218315 | 0.025105475 | 0.0263047   | 0.016259074 |
| ENSG00000168148 | 0.016336126 | 0.024288707 | 0.024662445 | 0.015042236 |
| ENSG00000069493 | 0.086493722 | 0.048417133 | 0.046610629 | 0.040573763 |
| ENSG00000123146 | 0.039046672 | 0.025051567 | 0.032529375 | 0.028452863 |
| ENSG00000189430 | 0.015241251 | 0.025374004 | 0.024877193 | 0.015556297 |
| ENSG00000184752 | 0.022187331 | 0.030074643 | 0.02874187  | 0.019987597 |
| ENSG00000177301 | 0.01770446  | 0.025414553 | 0.027493336 | 0.017865037 |
| ENSG00000180316 | 0.018312273 | 0.026829712 | 0.029011706 | 0.020884332 |
| ENSG00000196374 | 0.083493017 | 0.055019979 | 0.073835237 | 0.075398287 |
| ENSG00000114859 | 0.016630971 | 0.026155487 | 0.026043555 | 0.016042732 |
| ENSG00000162873 | 0.015252261 | 0.024591699 | 0.024569081 | 0.014740136 |
| ENSG00000132406 | 0.02673217  | 0.036162141 | 0.031070222 | 0.026973284 |
| ENSG00000111452 | 0.016446902 | 0.025521845 | 0.024848276 | 0.016862915 |
| ENSG00000175486 | 0.016117701 | 0.024736281 | 0.024468929 | 0.015509272 |
| ENSG00000078053 | 0.028723122 | 0.026978586 | 0.026984048 | 0.017520479 |
| ENSG00000185926 | 0.016591398 | 0.025018206 | 0.024588361 | 0.014430309 |
| ENSG00000170873 | 0.0414558   | 0.049381446 | 0.052950023 | 0.034136154 |
| ENSG00000150540 | 0.083121288 | 0.045943903 | 0.052720018 | 0.06547923  |
| ENSG00000167656 | 0.01600545  | 0.024794869 | 0.02542257  | 0.017747585 |
| ENSG00000167693 | 0.028332278 | 0.028362736 | 0.029844682 | 0.021378716 |
| ENSG00000013297 | 0.048006085 | 0.040746037 | 0.028839872 | 0.072390715 |
| ENSG00000182896 | 0.015448777 | 0.025124737 | 0.02451654  | 0.01482561  |
| ENSG00000198205 | 0.023938475 | 0.030686883 | 0.029659221 | 0.023413979 |
| ENSG00000162066 | 0.031336616 | 0.030118487 | 0.030265939 | 0.026595143 |
| ENSG00000115282 | 0.021436369 | 0.027508691 | 0.029725448 | 0.021170032 |
| ENSG00000138768 | 0.025423344 | 0.032686672 | 0.027862403 | 0.022335493 |
| ENSG00000171680 | 0.015217825 | 0.024658669 | 0.024677795 | 0.014867133 |
| ENSG00000198707 | 0.033754445 | 0.037991021 | 0.031964575 | 0.026758865 |
| ENSG00000184478 | 0.013519231 | 0.024227115 | 0.023726115 | 0.013884397 |
| ENSG00000253304 | 0.018342228 | 0.026839457 | 0.025674301 | 0.01808786  |
| ENSG00000106610 | 0.027419305 | 0.031785064 | 0.029493912 | 0.020703609 |
| ENSG00000137692 | 0.027788784 | 0.030819774 | 0.030223632 | 0.022417283 |
| ENSG00000178982 | 0.019289181 | 0.025510157 | 0.025234359 | 0.01712485  |
| ENSG00000117505 | 0.026797938 | 0.034670699 | 0.039117464 | 0.030450803 |
| ENSG00000172785 | 0.054791749 | 0.055414254 | 0.050114851 | 0.066160078 |
| ENSG00000080823 | 0.099842698 | 0.09167952  | 0.071322545 | 0.078583485 |
| ENSG00000105402 | 0.026537198 | 0.033468385 | 0.033530434 | 0.027913528 |
| ENSG00000137449 | 0.019567307 | 0.029537937 | 0.028088038 | 0.026246251 |
| ENSG00000133065 | 0.014992949 | 0.024313926 | 0.02546328  | 0.01471741  |
| ENSG00000141505 | 0.020114772 | 0.027067496 | 0.027225944 | 0.018632378 |
| ENSG00000132446 | 0.015166628 | 0.025293051 | 0.025939469 | 0.014611094 |
| ENSG00000091490 | 0.098200345 | 0.059615379 | 0.051155571 | 0.058220445 |
| ENSG00000153721 | 0.118831826 | 0.082835476 | 0.069953356 | 0.093167297 |
| ENSG00000197471 | 0.033030185 | 0.034604479 | 0.040993007 | 0.049717971 |
| ENSG00000197912 | 0.028936807 | 0.031325415 | 0.029234983 | 0.025705765 |
| ENSG00000239672 | 0.041614165 | 0.043324908 | 0.039644964 | 0.030216209 |
| ENSG00000024048 | 0.031445805 | 0.036768665 | 0.0315183   | 0.025898765 |
| ENSG00000177728 | 0.029840433 | 0.029366768 | 0.037454193 | 0.033679839 |
| ENSG00000159110 | 0.023408816 | 0.029097634 | 0.027720126 | 0.020606087 |
| ENSG00000148942 | 0.015880067 | 0.025575563 | 0.024612963 | 0.015528688 |
| ENSG00000177212 | 0.016290263 | 0.025623503 | 0.024831738 | 0.016381847 |
| ENSG00000204231 | 0.022077407 | 0.027124809 | 0.030205572 | 0.021173164 |

|                 |             |             |             |             |
|-----------------|-------------|-------------|-------------|-------------|
| ENSG00000126882 | 0.026076279 | 0.029602597 | 0.029338308 | 0.025388098 |
| ENSG00000206052 | 0.016170593 | 0.024077113 | 0.025447756 | 0.015096812 |
| ENSG00000152558 | 0.036636235 | 0.045321508 | 0.041809333 | 0.047683887 |
| ENSG00000145850 | 0.134146609 | 0.076173138 | 0.078933858 | 0.103757817 |
| ENSG00000063176 | 0.026570196 | 0.032699743 | 0.02993937  | 0.031071784 |
| ENSG00000148481 | 0.035382281 | 0.034190655 | 0.031411169 | 0.022725503 |
| ENSG00000020181 | 0.016360971 | 0.024801008 | 0.024233713 | 0.015737841 |
| ENSG00000113838 | 0.024870034 | 0.033203329 | 0.029794636 | 0.022431427 |
| ENSG00000170340 | 0.050205719 | 0.04936986  | 0.048157305 | 0.035835775 |
| ENSG00000112237 | 0.029060773 | 0.041153365 | 0.031235164 | 0.028026512 |
| ENSG00000162526 | 0.015814645 | 0.029599345 | 0.027103609 | 0.01742113  |
| ENSG00000135624 | 0.022848324 | 0.028336911 | 0.026165696 | 0.019468667 |
| ENSG00000178966 | 0.046540542 | 0.045920533 | 0.034894866 | 0.033270221 |
| ENSG00000146830 | 0.025527448 | 0.026879127 | 0.028381785 | 0.02723462  |
| ENSG00000116212 | 0.028966997 | 0.032934932 | 0.031484714 | 0.02773618  |
| ENSG00000070961 | 0.031555165 | 0.034731074 | 0.032365144 | 0.036219882 |
| ENSG00000189057 | 0.053106405 | 0.045329177 | 0.045261495 | 0.052958738 |
| ENSG00000138668 | 0.023042942 | 0.027976362 | 0.026792479 | 0.020426308 |
| ENSG00000069667 | 0.017088689 | 0.024737095 | 0.024697434 | 0.016717357 |
| ENSG00000113558 | 0.018766032 | 0.026685361 | 0.026357554 | 0.018323539 |
| ENSG00000178222 | 0.050314499 | 0.038060435 | 0.038064611 | 0.046898963 |
| ENSG00000143536 | 0.016355075 | 0.026162281 | 0.026035058 | 0.016557686 |
| ENSG00000152253 | 0.033278534 | 0.038647628 | 0.035293695 | 0.03513669  |
| ENSG00000168411 | 0.035389719 | 0.036965983 | 0.038812903 | 0.037191263 |
| ENSG00000236398 | 0.015090064 | 0.024478552 | 0.024974816 | 0.014743636 |
| ENSG00000174080 | 0.016702903 | 0.025208368 | 0.025127508 | 0.017200123 |
| ENSG00000145191 | 0.022656563 | 0.029112713 | 0.030592703 | 0.021525469 |
| ENSG00000146005 | 0.016288595 | 0.024572667 | 0.025366939 | 0.015230553 |
| ENSG00000131165 | 0.025895998 | 0.032512083 | 0.04557209  | 0.028159035 |
| ENSG00000135824 | 0.01463593  | 0.025944816 | 0.02578589  | 0.015590847 |
| ENSG00000167182 | 0.033589203 | 0.034719491 | 0.041920692 | 0.031214875 |
| ENSG00000011426 | 0.054947754 | 0.04552909  | 0.035833054 | 0.041683871 |
| ENSG00000133612 | 0.033060537 | 0.035173622 | 0.033522136 | 0.03828424  |
| ENSG00000197191 | 0.024279115 | 0.02950683  | 0.026178653 | 0.020590067 |
| ENSG00000073150 | 0.016775959 | 0.027535095 | 0.026391365 | 0.017941321 |
| ENSG00000172238 | 0.017791056 | 0.026042175 | 0.026350214 | 0.017438148 |
| ENSG00000157657 | 0.016726234 | 0.024608481 | 0.025217776 | 0.015273505 |
| ENSG00000078814 | 0.016177211 | 0.025002356 | 0.025205903 | 0.015831009 |
| ENSG00000188672 | 0.015728022 | 0.025942815 | 0.025056532 | 0.01485573  |
| ENSG00000095794 | 0.046533962 | 0.047953844 | 0.04559819  | 0.047929691 |
| ENSG00000119943 | 0.102877007 | 0.05442209  | 0.04346781  | 0.059710735 |
| ENSG00000134595 | 0.016073418 | 0.024802604 | 0.025135779 | 0.01601337  |
| ENSG00000149600 | 0.033050693 | 0.031979439 | 0.032539012 | 0.02572152  |
| ENSG00000128512 | 0.018815396 | 0.02552754  | 0.026594992 | 0.016798701 |
| ENSG00000148604 | 0.016134537 | 0.024747696 | 0.024221551 | 0.015445864 |
| ENSG00000081923 | 0.017383101 | 0.024958672 | 0.024481169 | 0.017268801 |
| ENSG00000174151 | 0.019387756 | 0.026835041 | 0.028994696 | 0.019986031 |
| ENSG00000189037 | 0.017308104 | 0.024681799 | 0.025303333 | 0.016143133 |
| ENSG00000064726 | 0.025151154 | 0.033351697 | 0.030289118 | 0.02191745  |
| ENSG00000166928 | 0.051176873 | 0.040702341 | 0.040321152 | 0.048589851 |
| ENSG00000165417 | 0.016670812 | 0.02614129  | 0.025158776 | 0.019336877 |
| ENSG00000005059 | 0.036195948 | 0.034673189 | 0.031425695 | 0.028321995 |
| ENSG00000170921 | 0.026562058 | 0.027594991 | 0.027001413 | 0.021387292 |
| ENSG00000164985 | 0.028731118 | 0.033376392 | 0.034149356 | 0.033452866 |

|                 |             |             |             |             |
|-----------------|-------------|-------------|-------------|-------------|
| ENSG00000134308 | 0.021854262 | 0.029159429 | 0.027585857 | 0.023944936 |
| ENSG00000174276 | 0.02944918  | 0.030823349 | 0.035019963 | 0.030151432 |
| ENSG00000170439 | 0.021274192 | 0.025962916 | 0.025482517 | 0.019262426 |
| ENSG00000166797 | 0.025412275 | 0.029190846 | 0.02642234  | 0.019510669 |
| ENSG00000175809 | 0.017538333 | 0.026143875 | 0.027013834 | 0.015941184 |
| ENSG00000076685 | 0.027871588 | 0.030178749 | 0.033294612 | 0.026232159 |
| ENSG00000047579 | 0.029200726 | 0.034320762 | 0.032709054 | 0.024529947 |
| ENSG00000139915 | 0.019679823 | 0.02473872  | 0.02457973  | 0.015649298 |
| ENSG00000112183 | 0.01649934  | 0.024962528 | 0.024967378 | 0.015264906 |
| ENSG00000074657 | 0.043373217 | 0.036461005 | 0.035174617 | 0.037980346 |
| ENSG00000165140 | 0.038820611 | 0.03298421  | 0.034008764 | 0.019890253 |
| ENSG00000143365 | 0.015359526 | 0.025340294 | 0.023961761 | 0.015481193 |
| ENSG00000168528 | 0.119060986 | 0.085857981 | 0.09296589  | 0.101602092 |
| ENSG00000081059 | 0.056214561 | 0.049149019 | 0.052372651 | 0.05684796  |
| ENSG00000118181 | 0.015790568 | 0.024650452 | 0.024470245 | 0.01904765  |
| ENSG00000175691 | 0.024734926 | 0.035136079 | 0.035341733 | 0.026290797 |
| ENSG00000143882 | 0.016190734 | 0.025438034 | 0.024928909 | 0.015054376 |
| ENSG00000140943 | 0.030356972 | 0.032768904 | 0.03482246  | 0.031580888 |
| ENSG00000169508 | 0.084453348 | 0.050230992 | 0.054634221 | 0.05939913  |
| ENSG00000111785 | 0.034278597 | 0.044237174 | 0.031930409 | 0.030515469 |
| ENSG00000145741 | 0.016070166 | 0.024880178 | 0.025403289 | 0.015090851 |
| ENSG00000066032 | 0.094255766 | 0.037239214 | 0.031265607 | 0.034561089 |
| ENSG00000082898 | 0.027138207 | 0.031490613 | 0.027804293 | 0.021280885 |
| ENSG00000138413 | 0.041895585 | 0.044133743 | 0.035757307 | 0.030445811 |
| ENSG00000212122 | 0.015281356 | 0.025157921 | 0.024704924 | 0.014748468 |
| ENSG00000166689 | 0.061586964 | 0.05616825  | 0.054219779 | 0.056521617 |
| ENSG00000165671 | 0.019560348 | 0.027165025 | 0.030172883 | 0.020198039 |
| ENSG00000197951 | 0.023221557 | 0.029435188 | 0.031419077 | 0.020930747 |
| ENSG00000120051 | 0.016060688 | 0.025329239 | 0.025724619 | 0.016358871 |
| ENSG00000188801 | 0.045038265 | 0.042348973 | 0.050754648 | 0.042166336 |
| ENSG00000121634 | 0.01521701  | 0.024889721 | 0.02481547  | 0.014808606 |
| ENSG00000169344 | 0.015125009 | 0.024493433 | 0.024686226 | 0.015313658 |
| ENSG00000145248 | 0.016448759 | 0.02559306  | 0.025393214 | 0.016139005 |
| ENSG00000116106 | 0.020387525 | 0.025363505 | 0.025721012 | 0.016740817 |
| ENSG00000206557 | 0.028861829 | 0.032731378 | 0.027849169 | 0.022635789 |
| ENSG00000166035 | 0.017872593 | 0.029064134 | 0.024756347 | 0.017695778 |
| ENSG00000171310 | 0.051443093 | 0.046168223 | 0.051897985 | 0.043983375 |
| ENSG00000154217 | 0.09813124  | 0.060786326 | 0.058176242 | 0.082512383 |
| ENSG00000172594 | 0.040658108 | 0.039167493 | 0.029773558 | 0.0320331   |
| ENSG00000177951 | 0.023797287 | 0.035159735 | 0.039617407 | 0.023333306 |
| ENSG00000139637 | 0.02199921  | 0.027095477 | 0.026898317 | 0.021826171 |
| ENSG00000106355 | 0.022964129 | 0.027720295 | 0.027907399 | 0.022340813 |
| ENSG00000165644 | 0.03510998  | 0.032296843 | 0.031558597 | 0.031700126 |
| ENSG00000125844 | 0.04859949  | 0.046941181 | 0.052876938 | 0.049684845 |
| ENSG00000134460 | 0.057140558 | 0.051874921 | 0.053492897 | 0.046408479 |
| ENSG00000110697 | 0.038668293 | 0.032689213 | 0.042463505 | 0.035056619 |
| ENSG00000171724 | 0.022882395 | 0.02905573  | 0.03175005  | 0.018598491 |
| ENSG00000139330 | 0.01542452  | 0.024173379 | 0.025760091 | 0.015204554 |
| ENSG00000168490 | 0.017921347 | 0.025129986 | 0.026780041 | 0.01694066  |
| ENSG00000137338 | 0.042208183 | 0.04233864  | 0.044523708 | 0.037425044 |
| ENSG00000242612 | 0.042604918 | 0.039778202 | 0.041242389 | 0.038003578 |
| ENSG00000093167 | 0.061355183 | 0.04622356  | 0.048961515 | 0.048058774 |
| ENSG00000167766 | 0.036519074 | 0.041828505 | 0.037198956 | 0.039303966 |
| ENSG00000196284 | 0.059361974 | 0.057382709 | 0.050807736 | 0.044875979 |

|                 |             |             |             |             |
|-----------------|-------------|-------------|-------------|-------------|
| ENSG00000203734 | 0.014990597 | 0.025170729 | 0.025097611 | 0.01434043  |
| ENSG00000163644 | 0.033651566 | 0.039250065 | 0.036945122 | 0.03074129  |
| ENSG00000137274 | 0.03329227  | 0.040790653 | 0.035881636 | 0.037251097 |
| ENSG00000109047 | 0.016369301 | 0.025238808 | 0.025336199 | 0.015340147 |
| ENSG00000131370 | 0.031136411 | 0.030783695 | 0.034834139 | 0.027865204 |
| ENSG00000149300 | 0.014760353 | 0.024948885 | 0.026348513 | 0.015048    |
| ENSG00000078549 | 0.015581847 | 0.025553695 | 0.024134092 | 0.015000438 |
| ENSG00000198722 | 0.052716914 | 0.064658847 | 0.042441432 | 0.044352623 |
| ENSG00000146802 | 0.029323744 | 0.03477045  | 0.033486344 | 0.023522956 |
| ENSG00000176022 | 0.041148536 | 0.0481714   | 0.049363414 | 0.047123986 |
| ENSG00000117906 | 0.033155911 | 0.039184215 | 0.033447254 | 0.028679173 |
| ENSG00000145781 | 0.032684296 | 0.039876405 | 0.034191509 | 0.027517985 |
| ENSG00000206047 | 0.016263544 | 0.025920487 | 0.02534266  | 0.016356382 |
| ENSG00000166822 | 0.033403276 | 0.034959276 | 0.036012307 | 0.029667685 |
| ENSG00000150764 | 0.027380606 | 0.032167508 | 0.031333525 | 0.024423238 |
| ENSG00000071203 | 0.014674934 | 0.024047173 | 0.023658679 | 0.01463859  |
| ENSG00000160055 | 0.02571023  | 0.033378552 | 0.026627517 | 0.021183513 |
| ENSG00000175866 | 0.016449214 | 0.026326122 | 0.024232725 | 0.019444306 |
| ENSG00000137948 | 0.015890076 | 0.02543098  | 0.02467548  | 0.016194242 |
| ENSG00000138483 | 0.017278236 | 0.027416306 | 0.025842269 | 0.017271694 |
| ENSG00000127241 | 0.015451487 | 0.026487962 | 0.025851138 | 0.015557147 |
| ENSG00000136883 | 0.021579338 | 0.028022237 | 0.028803181 | 0.017275522 |
| ENSG00000123136 | 0.033566685 | 0.031827394 | 0.03349523  | 0.032499395 |
| ENSG00000108557 | 0.034911754 | 0.045350304 | 0.035352876 | 0.045790633 |
| ENSG00000164106 | 0.015163521 | 0.024643918 | 0.024170196 | 0.014767707 |
| ENSG00000009724 | 0.017291028 | 0.024861167 | 0.02463603  | 0.015939602 |
| ENSG00000137266 | 0.080643048 | 0.098823845 | 0.034128709 | 0.033386855 |
| ENSG00000062194 | 0.02714987  | 0.035408521 | 0.030979319 | 0.022377374 |
| ENSG00000168884 | 0.026562279 | 0.033668823 | 0.037376215 | 0.026001821 |
| ENSG00000170502 | 0.031691502 | 0.033164098 | 0.029690305 | 0.02425743  |
| ENSG00000007908 | 0.016070513 | 0.024966667 | 0.024597074 | 0.015766897 |
| ENSG00000164168 | 0.026223565 | 0.037154468 | 0.038595974 | 0.027552367 |
| ENSG00000139714 | 0.018916369 | 0.025165821 | 0.025397159 | 0.017852908 |
| ENSG00000070367 | 0.025943157 | 0.031993822 | 0.030474357 | 0.033565797 |
| ENSG00000146247 | 0.027638434 | 0.033004652 | 0.029148837 | 0.022323402 |
| ENSG00000198033 | 0.039638547 | 0.038091752 | 0.039733637 | 0.059755327 |
| ENSG00000092931 | 0.027959397 | 0.03356792  | 0.039696795 | 0.02512151  |
| ENSG00000204704 | 0.014495603 | 0.024028215 | 0.024220059 | 0.01511373  |
| ENSG00000146731 | 0.031416071 | 0.035884427 | 0.031631765 | 0.030587058 |
| ENSG00000108839 | 0.019691019 | 0.025792957 | 0.028001247 | 0.018993734 |
| ENSG00000136305 | 0.054693065 | 0.050106444 | 0.03978441  | 0.03682303  |
| ENSG00000148468 | 0.104930597 | 0.093178193 | 0.05752117  | 0.089370706 |
| ENSG00000211452 | 0.017276152 | 0.026138469 | 0.025156284 | 0.017531829 |
| ENSG00000101265 | 0.018787485 | 0.028944578 | 0.028297255 | 0.018590155 |
| ENSG00000106086 | 0.015650402 | 0.025353228 | 0.025523861 | 0.014511274 |
| ENSG00000198837 | 0.024894516 | 0.030188889 | 0.031084296 | 0.021816097 |
| ENSG00000102678 | 0.028524221 | 0.029722827 | 0.02910096  | 0.020965281 |
| ENSG00000187147 | 0.028768871 | 0.03541215  | 0.04032711  | 0.027092409 |
| ENSG00000182379 | 0.017578544 | 0.028891137 | 0.028203692 | 0.018919967 |
| ENSG00000169302 | 0.022301143 | 0.025031299 | 0.024631851 | 0.014977075 |
| ENSG00000055950 | 0.03064162  | 0.04393088  | 0.037869209 | 0.036160202 |
| ENSG00000153140 | 0.03974472  | 0.039791967 | 0.031672461 | 0.034454819 |
| ENSG00000198756 | 0.078740433 | 0.055356744 | 0.027702991 | 0.026964361 |
| ENSG00000160963 | 0.017550562 | 0.025577146 | 0.026500194 | 0.015244427 |

|                 |             |             |             |             |
|-----------------|-------------|-------------|-------------|-------------|
| ENSG00000179295 | 0.033863796 | 0.037480474 | 0.032107903 | 0.026851343 |
| ENSG00000180543 | 0.114622931 | 0.065691291 | 0.067054113 | 0.086288406 |
| ENSG00000168077 | 0.014939468 | 0.025202387 | 0.025827089 | 0.015106821 |
| ENSG00000139631 | 0.034221236 | 0.037283731 | 0.034685166 | 0.041300757 |
| ENSG00000188266 | 0.057591674 | 0.039859555 | 0.036234132 | 0.03928034  |
| ENSG00000198967 | 0.014640189 | 0.024243335 | 0.025070977 | 0.01481584  |
| ENSG00000162441 | 0.042865374 | 0.060775402 | 0.044080346 | 0.032792209 |
| ENSG0000006837  | 0.033166851 | 0.034843661 | 0.036633056 | 0.032305138 |
| ENSG00000085514 | 0.071707004 | 0.056637358 | 0.04154912  | 0.05192633  |
| ENSG00000188056 | 0.017279918 | 0.025631599 | 0.025080381 | 0.017570088 |
| ENSG00000196923 | 0.046426733 | 0.039417175 | 0.045996564 | 0.047125263 |
| ENSG00000152266 | 0.015897396 | 0.025271559 | 0.024852959 | 0.017018592 |
| ENSG00000185359 | 0.02469602  | 0.030001066 | 0.03264901  | 0.019427381 |
| ENSG00000165355 | 0.031849221 | 0.033793772 | 0.03499839  | 0.027892235 |
| ENSG00000176681 | 0.018853162 | 0.026175768 | 0.026517655 | 0.016555685 |
| ENSG00000165152 | 0.019268826 | 0.0255214   | 0.026038474 | 0.01636893  |
| ENSG00000179055 | 0.015564599 | 0.025857821 | 0.025311847 | 0.016031879 |
| ENSG00000111319 | 0.01621233  | 0.024467959 | 0.025266062 | 0.014916128 |
| ENSG00000167759 | 0.016527708 | 0.02478122  | 0.02566435  | 0.015939597 |
| ENSG00000106245 | 0.020949088 | 0.028548979 | 0.02947953  | 0.020487618 |
| ENSG00000186566 | 0.015755404 | 0.024696871 | 0.024149246 | 0.015300779 |
| ENSG00000168952 | 0.147477451 | 0.096192603 | 0.073966329 | 0.066071945 |
| ENSG00000164124 | 0.025314949 | 0.029071463 | 0.028423977 | 0.023272627 |
| ENSG00000126353 | 0.050737087 | 0.052576306 | 0.051365349 | 0.06075798  |
| ENSG00000169249 | 0.037016229 | 0.042136935 | 0.040123314 | 0.040331608 |
| ENSG00000166444 | 0.017882256 | 0.027016474 | 0.025606022 | 0.019344096 |
| ENSG00000138073 | 0.033433453 | 0.030767514 | 0.033967116 | 0.03106554  |
| ENSG00000069122 | 0.01614816  | 0.02486275  | 0.025219404 | 0.015959296 |
| ENSG00000147206 | 0.015435489 | 0.023883195 | 0.024357799 | 0.014082028 |
| ENSG00000115053 | 0.043012709 | 0.029628503 | 0.033181096 | 0.026947098 |
| ENSG00000166598 | 0.029510093 | 0.033016347 | 0.034395833 | 0.03006179  |
| ENSG00000116670 | 0.029114149 | 0.028538247 | 0.029718531 | 0.022156348 |
| ENSG00000241685 | 0.025911893 | 0.031446836 | 0.029080586 | 0.021714216 |
| ENSG00000061337 | 0.018415861 | 0.025773072 | 0.025343827 | 0.016161995 |
| ENSG00000175213 | 0.021515001 | 0.028351388 | 0.038133481 | 0.021095301 |
| ENSG00000187172 | 0.019168224 | 0.028665713 | 0.028328289 | 0.022399875 |
| ENSG00000111011 | 0.026932339 | 0.033799458 | 0.029987358 | 0.01968027  |
| ENSG00000167468 | 0.026944595 | 0.030754618 | 0.032025766 | 0.024554504 |
| ENSG00000198624 | 0.038603254 | 0.036118912 | 0.036184884 | 0.027454563 |
| ENSG00000112715 | 0.027680643 | 0.033647027 | 0.028594696 | 0.023160651 |
| ENSG00000170044 | 0.017744366 | 0.025055492 | 0.024303455 | 0.015683511 |
| ENSG00000175634 | 0.034419659 | 0.037187366 | 0.036485363 | 0.033003497 |
| ENSG00000153395 | 0.03627385  | 0.035457829 | 0.036865984 | 0.03656992  |
| ENSG00000110955 | 0.016602628 | 0.025274413 | 0.025156744 | 0.016102545 |
| ENSG00000130383 | 0.019106972 | 0.024688455 | 0.02490428  | 0.01808444  |
| ENSG00000090269 | 0.015575571 | 0.024920676 | 0.024095284 | 0.014536041 |
| ENSG00000183305 | 0.016763204 | 0.024606553 | 0.026944662 | 0.015124167 |
| ENSG00000158985 | 0.032529545 | 0.041257642 | 0.040447156 | 0.027271057 |
| ENSG00000159248 | 0.018054996 | 0.025511428 | 0.024779202 | 0.016400876 |
| ENSG00000136895 | 0.044385973 | 0.041056145 | 0.03554142  | 0.041386239 |
| ENSG00000121410 | 0.021830552 | 0.029839139 | 0.026782644 | 0.021137657 |
| ENSG00000135974 | 0.036527634 | 0.033461148 | 0.03413208  | 0.031199237 |
| ENSG00000167748 | 0.05119244  | 0.038552398 | 0.039148026 | 0.051455361 |
| ENSG00000128271 | 0.033156964 | 0.041943315 | 0.039287108 | 0.037673229 |

|                 |             |             |             |             |
|-----------------|-------------|-------------|-------------|-------------|
| ENSG00000173705 | 0.017377525 | 0.025008243 | 0.027087256 | 0.017321855 |
| ENSG00000120314 | 0.025651675 | 0.033509866 | 0.031726709 | 0.023563878 |
| ENSG00000086666 | 0.042432402 | 0.057425303 | 0.044393106 | 0.053719283 |
| ENSG00000164087 | 0.045245599 | 0.045999392 | 0.039806288 | 0.03230437  |
| ENSG00000180346 | 0.052957274 | 0.048039158 | 0.039869663 | 0.04048317  |
| ENSG00000180245 | 0.01513542  | 0.025163613 | 0.025828685 | 0.014049807 |
| ENSG00000143294 | 0.026131888 | 0.034046792 | 0.035851834 | 0.02492369  |
| ENSG0000006607  | 0.029943101 | 0.031524359 | 0.030906781 | 0.029362127 |
| ENSG00000178307 | 0.026801401 | 0.030634231 | 0.033952535 | 0.02405696  |
| ENSG00000107864 | 0.054932909 | 0.050117566 | 0.043076252 | 0.043879118 |
| ENSG00000205777 | 0.018782885 | 0.026537338 | 0.025587368 | 0.017989908 |
| ENSG00000116793 | 0.045763294 | 0.053318251 | 0.03979925  | 0.037585874 |
| ENSG00000170085 | 0.032981601 | 0.037543748 | 0.03383798  | 0.021861163 |
| ENSG00000128159 | 0.021315555 | 0.030760521 | 0.035129    | 0.026232834 |
| ENSG00000150477 | 0.022846925 | 0.031204535 | 0.027165187 | 0.019738457 |
| ENSG00000101000 | 0.043218321 | 0.033089366 | 0.032789965 | 0.035750318 |
| ENSG00000134265 | 0.02945091  | 0.035042536 | 0.037118713 | 0.025856581 |
| ENSG00000185674 | 0.014397685 | 0.025188151 | 0.024346032 | 0.013822785 |
| ENSG00000099284 | 0.047914593 | 0.033405775 | 0.027165941 | 0.03433831  |
| ENSG00000179915 | 0.014883595 | 0.02583291  | 0.024238423 | 0.015532162 |
| ENSG00000241119 | 0.015800377 | 0.025434886 | 0.025431304 | 0.016031498 |
| ENSG00000144407 | 0.032228835 | 0.047594068 | 0.042486723 | 0.029280862 |
| ENSG00000203782 | 0.017749399 | 0.032905941 | 0.025524368 | 0.015243397 |
| ENSG00000143226 | 0.053046191 | 0.035348527 | 0.031816359 | 0.02659194  |
| ENSG00000168894 | 0.022647179 | 0.027290314 | 0.028904747 | 0.018758411 |
| ENSG00000171936 | 0.016571192 | 0.02526155  | 0.024706818 | 0.015451025 |
| ENSG00000184492 | 0.017664427 | 0.024616434 | 0.026283523 | 0.017581959 |
| ENSG00000177383 | 0.041784175 | 0.040383933 | 0.032035226 | 0.033394416 |
| ENSG00000102030 | 0.028111978 | 0.030606443 | 0.02776622  | 0.026555593 |
| ENSG00000172955 | 0.016399601 | 0.025592017 | 0.025635046 | 0.015185827 |
| ENSG00000120262 | 0.016244433 | 0.025625505 | 0.02418956  | 0.015733858 |
| ENSG00000166049 | 0.01671733  | 0.026076866 | 0.025076893 | 0.015964958 |
| ENSG00000168936 | 0.01885311  | 0.028714771 | 0.029293042 | 0.020838753 |
| ENSG00000185361 | 0.036575604 | 0.038395721 | 0.036821956 | 0.038604676 |
| ENSG00000169919 | 0.030816504 | 0.029951771 | 0.030814712 | 0.030562298 |
| ENSG00000168765 | 0.020584121 | 0.028647011 | 0.027540666 | 0.028029055 |
| ENSG00000204176 | 0.05795889  | 0.036660287 | 0.037463883 | 0.034098914 |
| ENSG00000138386 | 0.04254917  | 0.041646262 | 0.038185907 | 0.038430657 |
| ENSG00000118113 | 0.015623764 | 0.025117678 | 0.025222409 | 0.014850957 |
| ENSG00000143179 | 0.034424524 | 0.034076166 | 0.034043426 | 0.034972145 |
| ENSG00000112273 | 0.017311338 | 0.024896053 | 0.024257056 | 0.014866529 |
| ENSG00000174243 | 0.023311201 | 0.030582821 | 0.032561483 | 0.021744515 |
| ENSG00000171862 | 0.034157234 | 0.038585178 | 0.03784461  | 0.031195455 |
| ENSG00000101542 | 0.015234126 | 0.025203402 | 0.025228594 | 0.014789528 |
| ENSG00000137818 | 0.014310435 | 0.02340775  | 0.024200901 | 0.016141185 |
| ENSG00000127804 | 0.021154666 | 0.026318275 | 0.026137293 | 0.018326104 |
| ENSG00000125998 | 0.015606291 | 0.024392482 | 0.025860786 | 0.014943831 |
| ENSG00000121578 | 0.03004818  | 0.036249931 | 0.03329582  | 0.027977355 |
| ENSG00000136630 | 0.068159921 | 0.06446153  | 0.030453614 | 0.024554045 |
| ENSG00000165494 | 0.03355923  | 0.041150951 | 0.03719043  | 0.030876816 |
| ENSG00000132716 | 0.030960935 | 0.034537253 | 0.034185504 | 0.024837106 |
| ENSG00000011600 | 0.029641255 | 0.040385001 | 0.038053904 | 0.03345     |
| ENSG00000118496 | 0.036456797 | 0.040018417 | 0.043765082 | 0.038730953 |
| ENSG00000132522 | 0.015481787 | 0.025468909 | 0.025084263 | 0.015333671 |

|                 |             |             |             |             |
|-----------------|-------------|-------------|-------------|-------------|
| ENSG00000168065 | 0.016409735 | 0.024218109 | 0.026111846 | 0.015783759 |
| ENSG00000035681 | 0.031445848 | 0.035421397 | 0.033961385 | 0.032450788 |
| ENSG00000125485 | 0.016355073 | 0.024973377 | 0.024407008 | 0.014661504 |
| ENSG00000049541 | 0.029059228 | 0.033301368 | 0.032256043 | 0.024026051 |
| ENSG00000215644 | 0.031250233 | 0.049323288 | 0.025833444 | 0.028572397 |
| ENSG00000168454 | 0.018213926 | 0.02565289  | 0.025784713 | 0.01524102  |
| ENSG00000184863 | 0.020725432 | 0.030774049 | 0.031964431 | 0.022065821 |
| ENSG00000116809 | 0.026872149 | 0.02763581  | 0.037250441 | 0.022720129 |
| ENSG00000181733 | 0.018133808 | 0.027097622 | 0.026172148 | 0.016062228 |
| ENSG00000130997 | 0.018256325 | 0.02772961  | 0.026157028 | 0.020147409 |
| ENSG00000180209 | 0.016637428 | 0.024977071 | 0.024003786 | 0.015577229 |
| ENSG00000165661 | 0.032746044 | 0.037481962 | 0.035338518 | 0.028057326 |
| ENSG00000183386 | 0.070120018 | 0.049403226 | 0.058161909 | 0.057735292 |
| ENSG00000121775 | 0.024448823 | 0.027986514 | 0.03512463  | 0.023524843 |
| ENSG00000121068 | 0.037994995 | 0.037648343 | 0.036863124 | 0.041851458 |
| ENSG00000186603 | 0.077854019 | 0.04737762  | 0.047520487 | 0.049119452 |
| ENSG00000164904 | 0.098898906 | 0.068154154 | 0.063116659 | 0.075231456 |
| ENSG00000105143 | 0.018670874 | 0.026374098 | 0.025870622 | 0.019290786 |
| ENSG00000123560 | 0.015897902 | 0.024325838 | 0.02432004  | 0.01615102  |
| ENSG00000173065 | 0.030862134 | 0.037595972 | 0.035780376 | 0.027144575 |
| ENSG00000042753 | 0.0230549   | 0.029598843 | 0.027055397 | 0.021176462 |
| ENSG00000198336 | 0.024325646 | 0.026744348 | 0.029260336 | 0.025871393 |
| ENSG00000134686 | 0.017596547 | 0.026334826 | 0.025918521 | 0.01760017  |
| ENSG00000167578 | 0.028937976 | 0.033430711 | 0.031715912 | 0.031174846 |
| ENSG00000240694 | 0.016607615 | 0.029894298 | 0.025316631 | 0.01482035  |
| ENSG00000232258 | 0.05345262  | 0.057169882 | 0.077071682 | 0.047443621 |
| ENSG00000158571 | 0.016880928 | 0.026017266 | 0.025315953 | 0.016567838 |
| ENSG00000188782 | 0.019296651 | 0.029239188 | 0.030272241 | 0.018280779 |
| ENSG00000167004 | 0.023257432 | 0.030067456 | 0.030281353 | 0.023753043 |
| ENSG00000105677 | 0.029389957 | 0.029691523 | 0.028192533 | 0.026775564 |
| ENSG00000134817 | 0.016611971 | 0.026792509 | 0.025446113 | 0.016898685 |
| ENSG00000131143 | 0.016900768 | 0.025069454 | 0.025844153 | 0.016363059 |
| ENSG00000101974 | 0.034897233 | 0.04031091  | 0.034449571 | 0.040190071 |
| ENSG00000140548 | 0.045995939 | 0.026732005 | 0.025751528 | 0.018279429 |
| ENSG00000084073 | 0.031994561 | 0.036300773 | 0.035439237 | 0.039910613 |
| ENSG00000141013 | 0.063996645 | 0.059490551 | 0.061488411 | 0.071968459 |
| ENSG00000243725 | 0.028109104 | 0.034652687 | 0.03833253  | 0.026654223 |
| ENSG00000128185 | 0.036629334 | 0.034113587 | 0.034302807 | 0.024523509 |
| ENSG00000160633 | 0.02828726  | 0.031317196 | 0.034025455 | 0.026102784 |
| ENSG00000164924 | 0.042972692 | 0.053368771 | 0.05154608  | 0.049727693 |
| ENSG00000178821 | 0.036687219 | 0.039029688 | 0.041930662 | 0.029964709 |
| ENSG00000198740 | 0.027907556 | 0.030603057 | 0.030696275 | 0.02434987  |
| ENSG00000135625 | 0.022481206 | 0.026913561 | 0.025277176 | 0.017300677 |
| ENSG00000047932 | 0.028699413 | 0.032474705 | 0.036373018 | 0.025145979 |
| ENSG00000140326 | 0.03197221  | 0.037946374 | 0.034170891 | 0.025788129 |
| ENSG00000229035 | 0.069206771 | 0.038341954 | 0.026170213 | 0.041739906 |
| ENSG00000146085 | 0.025659499 | 0.031946131 | 0.03164932  | 0.021736645 |
| ENSG00000013374 | 0.039425184 | 0.043309196 | 0.034526642 | 0.032106937 |
| ENSG00000181433 | 0.015545953 | 0.025964206 | 0.025520143 | 0.014820442 |
| ENSG00000105991 | 0.016610059 | 0.025326094 | 0.024045169 | 0.015529476 |
| ENSG00000187720 | 0.018721067 | 0.026892358 | 0.02641007  | 0.018193882 |
| ENSG00000127578 | 0.016790342 | 0.026750153 | 0.025888478 | 0.015979965 |
| ENSG00000168005 | 0.026110261 | 0.031848625 | 0.034278837 | 0.026408172 |
| ENSG00000197930 | 0.048736995 | 0.038577989 | 0.042450168 | 0.034375523 |

|                 |             |             |             |             |
|-----------------|-------------|-------------|-------------|-------------|
| ENSG0000072736  | 0.032958102 | 0.032764982 | 0.032239611 | 0.033113705 |
| ENSG00000174851 | 0.026859994 | 0.029424505 | 0.031896255 | 0.024974267 |
| ENSG00000129194 | 0.016313075 | 0.024057268 | 0.025413204 | 0.016775775 |
| ENSG00000143469 | 0.020021107 | 0.027297669 | 0.026299425 | 0.019100132 |
| ENSG00000105392 | 0.014930888 | 0.02561597  | 0.024877651 | 0.016388747 |
| ENSG00000121871 | 0.015484829 | 0.026248964 | 0.024460696 | 0.016252899 |
| ENSG00000169696 | 0.018249404 | 0.026980481 | 0.028598315 | 0.019042472 |
| ENSG00000148680 | 0.056205418 | 0.025367298 | 0.026519143 | 0.014256785 |
| ENSG00000175792 | 0.036219775 | 0.037579437 | 0.03178466  | 0.031211414 |
| ENSG00000163697 | 0.027067857 | 0.024380973 | 0.026071841 | 0.017881628 |
| ENSG00000198417 | 0.05959506  | 0.054247915 | 0.065990155 | 0.046478925 |
| ENSG00000149554 | 0.042740883 | 0.040237891 | 0.033955531 | 0.039884961 |
| ENSG00000179673 | 0.014848864 | 0.024397665 | 0.025113046 | 0.015580202 |
| ENSG00000104361 | 0.016858353 | 0.025231479 | 0.025046994 | 0.017363442 |
| ENSG00000132010 | 0.03948256  | 0.033746523 | 0.036205487 | 0.02975761  |
| ENSG00000167202 | 0.03595884  | 0.042285661 | 0.033828207 | 0.031383935 |
| ENSG00000180917 | 0.041876102 | 0.040224867 | 0.039297181 | 0.039589889 |
| ENSG00000145194 | 0.015624472 | 0.023911988 | 0.024261348 | 0.014977759 |
| ENSG00000106636 | 0.024808899 | 0.032926723 | 0.037691617 | 0.029424626 |
| ENSG00000138663 | 0.026022871 | 0.031068845 | 0.030193018 | 0.02246301  |
| ENSG00000135317 | 0.023464889 | 0.027635066 | 0.031084312 | 0.021306594 |
| ENSG00000118507 | 0.10345725  | 0.078776022 | 0.097584162 | 0.08859851  |
| ENSG00000196510 | 0.025631833 | 0.031733666 | 0.031010312 | 0.0254283   |
| ENSG00000150681 | 0.016967729 | 0.027237106 | 0.025564519 | 0.016119681 |
| ENSG00000187808 | 0.025082201 | 0.032652219 | 0.029037549 | 0.025646701 |
| ENSG00000124733 | 0.027927033 | 0.0308695   | 0.02843291  | 0.02348597  |
| ENSG00000143127 | 0.016295281 | 0.025241838 | 0.026140108 | 0.015226356 |
| ENSG00000160908 | 0.032195121 | 0.046238341 | 0.057784408 | 0.035045158 |
| ENSG00000130749 | 0.018312598 | 0.028513523 | 0.02560699  | 0.017678073 |
| ENSG00000238243 | 0.015576489 | 0.025356353 | 0.025335863 | 0.017223579 |
| ENSG00000125375 | 0.030469588 | 0.03536329  | 0.032354107 | 0.029176472 |
| ENSG00000204963 | 0.015620293 | 0.025286946 | 0.024767664 | 0.014542309 |
| ENSG00000163812 | 0.027803789 | 0.03438784  | 0.03008612  | 0.028781257 |
| ENSG00000122783 | 0.036896592 | 0.040985966 | 0.033573584 | 0.038092089 |
| ENSG00000171530 | 0.022196138 | 0.026683455 | 0.026314946 | 0.018508009 |
| ENSG00000011295 | 0.031393157 | 0.031308626 | 0.032985476 | 0.029182602 |
| ENSG00000182156 | 0.01682513  | 0.026293654 | 0.025636328 | 0.016528573 |
| ENSG00000215704 | 0.015842509 | 0.024782416 | 0.025527191 | 0.015108124 |
| ENSG00000100095 | 0.015648424 | 0.026437193 | 0.025542278 | 0.015798858 |
| ENSG00000172156 | 0.016099386 | 0.025861297 | 0.025969957 | 0.016142469 |
| ENSG00000123360 | 0.021006456 | 0.02675754  | 0.028120017 | 0.019618665 |
| ENSG00000160014 | 0.034464111 | 0.040017913 | 0.03470795  | 0.031083389 |
| ENSG00000143033 | 0.026521967 | 0.031287752 | 0.03294945  | 0.021342443 |
| ENSG00000204577 | 0.112020271 | 0.072534537 | 0.063434411 | 0.049034996 |
| ENSG00000076248 | 0.035376773 | 0.0396469   | 0.030454613 | 0.031499417 |
| ENSG00000127362 | 0.014606594 | 0.024659101 | 0.024733924 | 0.015505016 |
| ENSG00000131503 | 0.039689323 | 0.042935551 | 0.040088063 | 0.035233368 |
| ENSG00000154611 | 0.17555734  | 0.105514857 | 0.094227941 | 0.134518227 |
| ENSG00000107874 | 0.022638148 | 0.029185714 | 0.028710048 | 0.019365003 |
| ENSG00000163141 | 0.018708902 | 0.025665424 | 0.025447215 | 0.0172816   |
| ENSG00000112280 | 0.015268245 | 0.024094459 | 0.026289776 | 0.014088395 |
| ENSG00000174599 | 0.028201232 | 0.024650922 | 0.024982336 | 0.018821772 |
| ENSG00000138029 | 0.021629512 | 0.027818113 | 0.028408845 | 0.020934791 |
| ENSG00000185803 | 0.03162137  | 0.03641137  | 0.044612055 | 0.033384703 |



|                |             |             |             |             |
|----------------|-------------|-------------|-------------|-------------|
| ENSG0000077782 | 0.017202039 | 0.025578642 | 0.025241616 | 0.016634725 |
| ENSG0000073670 | 0.016789995 | 0.026557811 | 0.024971379 | 0.015037072 |
| ENSG0000165688 | 0.023009914 | 0.028502987 | 0.033363422 | 0.024563777 |
| ENSG0000080166 | 0.016491641 | 0.025625658 | 0.024986499 | 0.015943557 |
| ENSG0000119760 | 0.016696598 | 0.02609605  | 0.024756387 | 0.0158917   |
| ENSG0000120756 | 0.049321333 | 0.035825133 | 0.032968184 | 0.035278885 |
| ENSG0000157330 | 0.014764739 | 0.024920976 | 0.025022768 | 0.014169922 |
| ENSG0000166847 | 0.027204656 | 0.032075647 | 0.035823563 | 0.025154575 |
| ENSG0000182591 | 0.018598807 | 0.027385892 | 0.026806705 | 0.020895188 |
| ENSG0000048028 | 0.047055772 | 0.054307724 | 0.039787391 | 0.034092536 |
| ENSG0000138036 | 0.025037547 | 0.028200288 | 0.027101005 | 0.027061643 |
| ENSG0000188229 | 0.029862299 | 0.027675382 | 0.033179048 | 0.029942521 |
| ENSG0000159674 | 0.080256956 | 0.070713382 | 0.064027902 | 0.074266556 |
| ENSG0000166106 | 0.015660743 | 0.024413287 | 0.024581924 | 0.014963322 |
| ENSG0000184708 | 0.035190352 | 0.039005845 | 0.039661576 | 0.032734774 |
| ENSG0000134864 | 0.051105726 | 0.077754941 | 0.079966213 | 0.052275653 |
| ENSG0000127399 | 0.024041831 | 0.031176186 | 0.030626018 | 0.023040365 |
| ENSG0000182944 | 0.030932327 | 0.033602467 | 0.035519034 | 0.030284095 |
| ENSG0000106415 | 0.052131133 | 0.056975934 | 0.043848591 | 0.042063304 |
| ENSG0000073060 | 0.032141069 | 0.034937817 | 0.03456805  | 0.027172321 |
| ENSG0000111266 | 0.038410211 | 0.038086978 | 0.041095119 | 0.048279052 |
| ENSG0000196591 | 0.024681047 | 0.030829991 | 0.028409833 | 0.024798154 |
| ENSG0000099953 | 0.017659738 | 0.026324517 | 0.026603839 | 0.016520502 |
| ENSG0000145736 | 0.035054715 | 0.041564726 | 0.040169023 | 0.033966683 |
| ENSG0000198668 | 0.031612434 | 0.036488672 | 0.034106088 | 0.031802492 |
| ENSG0000145495 | 0.03817244  | 0.040698234 | 0.035469579 | 0.037191838 |
| ENSG0000176909 | 0.01807038  | 0.024704292 | 0.024144844 | 0.017684603 |
| ENSG0000067167 | 0.025828655 | 0.031746484 | 0.034071231 | 0.025998696 |
| ENSG0000100628 | 0.116295001 | 0.095722425 | 0.085660323 | 0.119740684 |
| ENSG0000100395 | 0.033210028 | 0.034359789 | 0.035979216 | 0.030754601 |
| ENSG0000125285 | 0.015325236 | 0.024604153 | 0.024997757 | 0.014579281 |
| ENSG0000170681 | 0.015482481 | 0.024692064 | 0.025194453 | 0.01442265  |
| ENSG0000121989 | 0.041114143 | 0.030776124 | 0.026546972 | 0.025304776 |
| ENSG0000101888 | 0.032595604 | 0.034820989 | 0.032165696 | 0.02297181  |
| ENSG0000149489 | 0.017012536 | 0.025759683 | 0.026295566 | 0.015958486 |
| ENSG0000146463 | 0.036819606 | 0.043699271 | 0.032321966 | 0.02984753  |
| ENSG0000166090 | 0.017460097 | 0.025523213 | 0.025554841 | 0.015769258 |
| ENSG0000154165 | 0.05504959  | 0.053227364 | 0.045711448 | 0.048808483 |
| ENSG0000163840 | 0.045729697 | 0.050981809 | 0.049759042 | 0.041392833 |
| ENSG0000132819 | 0.037905433 | 0.043899886 | 0.036266734 | 0.038592821 |
| ENSG0000072195 | 0.016854747 | 0.025542265 | 0.025687255 | 0.016037466 |
| ENSG0000132591 | 0.025887555 | 0.032505079 | 0.036463769 | 0.029843933 |
| ENSG0000205358 | 0.055379313 | 0.060908842 | 0.065766204 | 0.06383946  |
| ENSG0000135374 | 0.015553195 | 0.025373053 | 0.024964288 | 0.015661439 |
| ENSG0000170017 | 0.039294821 | 0.043608481 | 0.040930609 | 0.043075664 |
| ENSG0000132323 | 0.027301397 | 0.032156252 | 0.032710241 | 0.023969415 |
| ENSG0000099250 | 0.020109635 | 0.027537952 | 0.027582947 | 0.016313496 |
| ENSG0000168143 | 0.01599816  | 0.024093952 | 0.025252515 | 0.014816545 |
| ENSG0000188747 | 0.017232985 | 0.026451921 | 0.026734586 | 0.019030577 |
| ENSG0000141526 | 0.080097525 | 0.049901896 | 0.044785381 | 0.049855164 |
| ENSG0000101489 | 0.020124409 | 0.028433662 | 0.026982482 | 0.018315806 |
| ENSG0000149292 | 0.028975216 | 0.028775235 | 0.027184343 | 0.034971279 |
| ENSG0000118137 | 0.017253085 | 0.025367026 | 0.025518612 | 0.018899483 |
| ENSG0000155090 | 0.0456647   | 0.047020941 | 0.042502666 | 0.035070868 |

|                 |             |             |             |             |
|-----------------|-------------|-------------|-------------|-------------|
| ENSG00000160752 | 0.023744017 | 0.02830442  | 0.02650764  | 0.019859463 |
| ENSG00000101298 | 0.016327215 | 0.024394658 | 0.025828375 | 0.014831002 |
| ENSG00000147669 | 0.02324956  | 0.029197606 | 0.027426806 | 0.021385208 |
| ENSG00000144891 | 0.015950347 | 0.024293056 | 0.024987993 | 0.014431238 |
| ENSG00000104671 | 0.027580391 | 0.032479756 | 0.032171405 | 0.022230486 |
| ENSG00000111046 | 0.024013746 | 0.026695242 | 0.025539299 | 0.018909825 |
| ENSG00000110756 | 0.029042924 | 0.032732698 | 0.029603837 | 0.024860575 |
| ENSG00000188322 | 0.012709858 | 0.023716982 | 0.023823376 | 0.013691245 |
| ENSG00000163703 | 0.052836674 | 0.045963037 | 0.036638244 | 0.044430304 |
| ENSG00000114520 | 0.02901546  | 0.029953968 | 0.029537812 | 0.030147178 |
| ENSG00000203618 | 0.045107351 | 0.037599805 | 0.035394955 | 0.025693437 |
| ENSG00000196944 | 0.016490322 | 0.025852586 | 0.025027866 | 0.016256163 |
| ENSG00000129116 | 0.099054911 | 0.041396884 | 0.040540436 | 0.037777006 |
| ENSG00000076928 | 0.024469798 | 0.034915379 | 0.044884557 | 0.036861583 |
| ENSG00000185313 | 0.017117378 | 0.025201817 | 0.025002795 | 0.014338806 |
| ENSG00000185651 | 0.034380551 | 0.038012425 | 0.03704272  | 0.033281442 |
| ENSG00000103496 | 0.025512773 | 0.029324553 | 0.030602548 | 0.026149574 |
| ENSG00000185627 | 0.023435631 | 0.029757205 | 0.029150451 | 0.024067386 |
| ENSG00000099814 | 0.039669938 | 0.035828707 | 0.034764386 | 0.030235222 |
| ENSG00000092871 | 0.025662976 | 0.029908789 | 0.024868789 | 0.021145738 |
| ENSG00000176714 | 0.018635402 | 0.027076805 | 0.025996008 | 0.020064787 |
| ENSG00000127993 | 0.019053323 | 0.027328036 | 0.026359488 | 0.016800526 |
| ENSG00000171517 | 0.014819036 | 0.024381422 | 0.025068519 | 0.014417699 |
| ENSG00000155269 | 0.016254371 | 0.025546506 | 0.025300529 | 0.015964017 |
| ENSG00000071894 | 0.031670386 | 0.041490153 | 0.03553148  | 0.026739951 |
| ENSG00000100075 | 0.028315914 | 0.029516933 | 0.034064329 | 0.029295714 |
| ENSG00000165506 | 0.030782511 | 0.033395178 | 0.030676214 | 0.029756068 |
| ENSG00000180210 | 0.017024575 | 0.026578057 | 0.026534852 | 0.015934558 |
| ENSG00000129696 | 0.026221075 | 0.03174163  | 0.031877727 | 0.023936122 |
| ENSG00000198576 | 0.015951004 | 0.024979747 | 0.024344168 | 0.016251055 |
| ENSG00000103355 | 0.014777531 | 0.025835949 | 0.024704833 | 0.016312046 |
| ENSG00000156398 | 0.063527081 | 0.069808637 | 0.056248131 | 0.049521799 |
| ENSG00000204450 | 0.01538022  | 0.024642589 | 0.02474729  | 0.015605375 |
| ENSG00000105926 | 0.038454521 | 0.035094093 | 0.03470398  | 0.033222732 |
| ENSG00000205517 | 0.020982153 | 0.028086303 | 0.030041559 | 0.030658521 |
| ENSG00000114302 | 0.026678364 | 0.030958661 | 0.029504165 | 0.025822617 |
| ENSG00000064692 | 0.09588746  | 0.03540795  | 0.037433026 | 0.024968663 |
| ENSG00000083812 | 0.019503183 | 0.03188108  | 0.033238465 | 0.019928546 |
| ENSG00000151151 | 0.017348636 | 0.026585856 | 0.027001984 | 0.018556315 |
| ENSG00000213920 | 0.026132572 | 0.029792906 | 0.029254253 | 0.026220157 |
| ENSG00000151790 | 0.063334275 | 0.03079933  | 0.029354751 | 0.029756835 |
| ENSG00000065809 | 0.052343008 | 0.044047984 | 0.041599654 | 0.049558306 |
| ENSG00000170369 | 0.015583846 | 0.024837204 | 0.025003509 | 0.015144941 |
| ENSG00000143727 | 0.022838809 | 0.029832467 | 0.031092064 | 0.024294356 |
| ENSG00000196628 | 0.034760339 | 0.038695577 | 0.033845426 | 0.032434831 |
| ENSG00000172733 | 0.015753371 | 0.024849177 | 0.025739963 | 0.015190767 |
| ENSG00000196666 | 0.016407943 | 0.024354851 | 0.024613922 | 0.016010086 |
| ENSG00000073737 | 0.102171202 | 0.098095628 | 0.095974686 | 0.128178738 |
| ENSG00000183943 | 0.045700649 | 0.041016729 | 0.044425927 | 0.032827257 |
| ENSG00000196482 | 0.017242917 | 0.025789514 | 0.025108583 | 0.017464238 |
| ENSG00000170144 | 0.027308711 | 0.031897107 | 0.029289705 | 0.021066568 |
| ENSG00000173041 | 0.03381051  | 0.036759305 | 0.030102793 | 0.026913013 |
| ENSG00000099849 | 0.044995467 | 0.048858272 | 0.03813773  | 0.039582315 |
| ENSG00000161082 | 0.018441103 | 0.025082533 | 0.025942162 | 0.015939449 |

|                 |             |             |             |             |
|-----------------|-------------|-------------|-------------|-------------|
| ENSG00000137976 | 0.016477956 | 0.024864676 | 0.025484544 | 0.016344357 |
| ENSG00000100625 | 0.017034437 | 0.026090063 | 0.027908764 | 0.020075144 |
| ENSG00000185946 | 0.029739065 | 0.034265711 | 0.035755025 | 0.032673319 |
| ENSG00000139173 | 0.038410859 | 0.039305907 | 0.04432615  | 0.030491187 |
| ENSG00000133101 | 0.07413242  | 0.068278293 | 0.070277516 | 0.063145079 |
| ENSG00000120725 | 0.03615064  | 0.035141854 | 0.039203349 | 0.036855452 |
| ENSG00000188732 | 0.048058546 | 0.047212525 | 0.047804831 | 0.044641096 |
| ENSG00000152454 | 0.043936205 | 0.049949923 | 0.055683099 | 0.042289408 |
| ENSG00000171970 | 0.028971025 | 0.03667926  | 0.035577249 | 0.027435919 |
| ENSG00000128218 | 0.084457402 | 0.078663266 | 0.081393835 | 0.086830485 |
| ENSG00000121807 | 0.017742128 | 0.026075282 | 0.026440348 | 0.017404724 |
| ENSG00000114120 | 0.039391028 | 0.037315966 | 0.043144254 | 0.037312679 |
| ENSG00000164010 | 0.044766778 | 0.043618528 | 0.031432469 | 0.036412422 |
| ENSG00000137474 | 0.01562761  | 0.023925095 | 0.024791965 | 0.016176461 |
| ENSG00000044090 | 0.031133331 | 0.031210964 | 0.034829665 | 0.031956839 |
| ENSG00000103249 | 0.030484654 | 0.037464972 | 0.033449755 | 0.029964689 |
| ENSG00000112514 | 0.022695324 | 0.028073853 | 0.030525252 | 0.021310156 |
| ENSG00000072415 | 0.031251222 | 0.033450233 | 0.035118351 | 0.031343128 |
| ENSG00000139977 | 0.040386712 | 0.046384754 | 0.03838565  | 0.031598453 |
| ENSG00000162804 | 0.018246711 | 0.024956357 | 0.025702805 | 0.016242563 |
| ENSG00000162616 | 0.040060185 | 0.038618849 | 0.035802035 | 0.031800737 |
| ENSG00000219481 | 0.028150969 | 0.034083296 | 0.030443656 | 0.025084143 |
| ENSG00000170381 | 0.032868674 | 0.033565932 | 0.034626625 | 0.031562888 |
| ENSG00000124102 | 0.03157304  | 0.038179    | 0.026677815 | 0.021651117 |
| ENSG00000137804 | 0.038088447 | 0.036588264 | 0.032035181 | 0.024913721 |
| ENSG00000071909 | 0.047335167 | 0.039569613 | 0.038791887 | 0.046433999 |
| ENSG00000124789 | 0.032173537 | 0.033773866 | 0.031206459 | 0.030221442 |
| ENSG00000174807 | 0.018868088 | 0.026948133 | 0.024680249 | 0.015948101 |
| ENSG00000182107 | 0.0166272   | 0.025597023 | 0.024830946 | 0.016885458 |
| ENSG00000104205 | 0.035421037 | 0.030873292 | 0.037261784 | 0.027646295 |
| ENSG00000105556 | 0.042030856 | 0.041642755 | 0.039962827 | 0.026703797 |
| ENSG00000116096 | 0.054341359 | 0.057588748 | 0.045073871 | 0.050437099 |
| ENSG00000104892 | 0.024180031 | 0.028018694 | 0.027947816 | 0.017901263 |
| ENSG00000135778 | 0.042378813 | 0.039398874 | 0.038449495 | 0.029971834 |
| ENSG00000105419 | 0.019619236 | 0.028758442 | 0.028520834 | 0.017957255 |
| ENSG00000145332 | 0.032390292 | 0.039139185 | 0.040309355 | 0.027401455 |
| ENSG00000174125 | 0.052144207 | 0.07169487  | 0.069349032 | 0.064797515 |
| ENSG00000140030 | 0.047147396 | 0.054487052 | 0.045954825 | 0.038122627 |
| ENSG00000080298 | 0.023958862 | 0.02696602  | 0.027244441 | 0.019844655 |
| ENSG00000183473 | 0.0169462   | 0.024896472 | 0.02511719  | 0.01717149  |
| ENSG00000108679 | 0.040961258 | 0.079534437 | 0.07603617  | 0.090752439 |
| ENSG00000142661 | 0.015252948 | 0.02471924  | 0.024541315 | 0.015577645 |
| ENSG00000145708 | 0.015585572 | 0.02504623  | 0.026026501 | 0.015627464 |
| ENSG00000130045 | 0.016549548 | 0.024984922 | 0.024909255 | 0.015988055 |
| ENSG00000127324 | 0.01526887  | 0.025396146 | 0.024709351 | 0.015853797 |
| ENSG00000184701 | 0.038421427 | 0.037890769 | 0.03494573  | 0.038116832 |
| ENSG00000177889 | 0.028441883 | 0.040192843 | 0.033792602 | 0.024877782 |
| ENSG00000179163 | 0.066711388 | 0.043049645 | 0.050461855 | 0.057341902 |
| ENSG00000116171 | 0.025426663 | 0.030454272 | 0.028271359 | 0.021241425 |
| ENSG00000165929 | 0.070154532 | 0.06837468  | 0.054421961 | 0.063433314 |
| ENSG00000179010 | 0.028118147 | 0.033233505 | 0.030871901 | 0.023419413 |
| ENSG00000099721 | 0.017334723 | 0.024982708 | 0.024675891 | 0.01593064  |
| ENSG00000087299 | 0.028635726 | 0.03261943  | 0.030636487 | 0.02273631  |
| ENSG00000171405 | 0.018229242 | 0.024521644 | 0.025316644 | 0.017466728 |

|                 |             |             |             |             |
|-----------------|-------------|-------------|-------------|-------------|
| ENSG00000198643 | 0.0330844   | 0.027154286 | 0.024981718 | 0.020181791 |
| ENSG00000206337 | 0.026334818 | 0.038340874 | 0.031870092 | 0.026230916 |
| ENSG00000184811 | 0.015157624 | 0.025591871 | 0.026002306 | 0.015513138 |
| ENSG00000119737 | 0.017779726 | 0.025194483 | 0.024955687 | 0.016125293 |
| ENSG00000140470 | 0.016851707 | 0.025034879 | 0.025430562 | 0.015305256 |
| ENSG00000160803 | 0.022794678 | 0.030331672 | 0.027491838 | 0.019086443 |
| ENSG00000182687 | 0.023452486 | 0.026887782 | 0.030490845 | 0.021663356 |
| ENSG00000132801 | 0.032063714 | 0.03237553  | 0.03020045  | 0.022712612 |
| ENSG00000174788 | 0.031741003 | 0.043780591 | 0.038275905 | 0.043055625 |
| ENSG00000153551 | 0.135491397 | 0.122634331 | 0.09189791  | 0.129472804 |
| ENSG00000134917 | 0.01575311  | 0.024795593 | 0.026240484 | 0.015561043 |
| ENSG00000108700 | 0.015357374 | 0.024737343 | 0.024897312 | 0.016029665 |
| ENSG00000076043 | 0.067939347 | 0.062901497 | 0.045688553 | 0.052692212 |
| ENSG00000141579 | 0.020317499 | 0.026027957 | 0.025527958 | 0.01816807  |
| ENSG00000050030 | 0.065106846 | 0.056732865 | 0.045834073 | 0.058803384 |
| ENSG00000154227 | 0.015436945 | 0.027121834 | 0.026015223 | 0.015464718 |
| ENSG00000124786 | 0.03705662  | 0.042093044 | 0.033038963 | 0.033468255 |
| ENSG00000138311 | 0.016385787 | 0.024981588 | 0.025453423 | 0.016902672 |
| ENSG00000123843 | 0.101342435 | 0.064327866 | 0.0441929   | 0.06830588  |
| ENSG00000119147 | 0.016960001 | 0.025021895 | 0.025090586 | 0.014576166 |
| ENSG00000175197 | 0.052343924 | 0.051014205 | 0.048125537 | 0.042615162 |
| ENSG00000175602 | 0.033399183 | 0.031364215 | 0.032788474 | 0.034755518 |
| ENSG00000244005 | 0.02346783  | 0.030010964 | 0.027013237 | 0.020151908 |
| ENSG00000105429 | 0.017503756 | 0.026193886 | 0.026300404 | 0.017103185 |
| ENSG00000151532 | 0.020910636 | 0.028672355 | 0.027873715 | 0.018151124 |
| ENSG00000129682 | 0.015429743 | 0.024519555 | 0.024215752 | 0.014265329 |
| ENSG00000164081 | 0.025324094 | 0.030112305 | 0.030412002 | 0.022450494 |
| ENSG00000115306 | 0.030083266 | 0.035955388 | 0.029488285 | 0.033791462 |
| ENSG00000153563 | 0.017814806 | 0.026995213 | 0.026248273 | 0.025150452 |
| ENSG00000038210 | 0.030324925 | 0.039278796 | 0.032722007 | 0.02347164  |
| ENSG00000168787 | 0.015961792 | 0.025210265 | 0.025661098 | 0.015880642 |
| ENSG00000104140 | 0.05495316  | 0.049304323 | 0.047563773 | 0.050572542 |
| ENSG00000164849 | 0.092129325 | 0.072938499 | 0.067394225 | 0.080820845 |
| ENSG00000110925 | 0.032924391 | 0.035007284 | 0.035061506 | 0.026480947 |
| ENSG00000116285 | 0.063630336 | 0.055646137 | 0.043932067 | 0.048816261 |
| ENSG00000186971 | 0.017292344 | 0.025493501 | 0.024845108 | 0.015617294 |
| ENSG00000068654 | 0.037035268 | 0.051160509 | 0.054828007 | 0.057890421 |
| ENSG00000154856 | 0.018496441 | 0.024727412 | 0.024390898 | 0.015808615 |
| ENSG00000177599 | 0.015511991 | 0.024534933 | 0.024379459 | 0.014581699 |
| ENSG00000198909 | 0.01593556  | 0.024900675 | 0.024962691 | 0.013836119 |
| ENSG00000184903 | 0.043876281 | 0.043799063 | 0.042845235 | 0.040496806 |
| ENSG00000124177 | 0.029486143 | 0.040750232 | 0.033584677 | 0.034143011 |
| ENSG00000099956 | 0.039729148 | 0.039190899 | 0.044449179 | 0.038253542 |
| ENSG00000235718 | 0.015811487 | 0.02614338  | 0.024870665 | 0.015012445 |
| ENSG00000166987 | 0.017562984 | 0.027081628 | 0.025060842 | 0.014528915 |
| ENSG00000188766 | 0.018674046 | 0.025720999 | 0.026579003 | 0.015743083 |
| ENSG00000130811 | 0.017928957 | 0.025891687 | 0.026599376 | 0.018512963 |
| ENSG00000203879 | 0.022746518 | 0.028979281 | 0.035024428 | 0.031598644 |
| ENSG00000214513 | 0.01505341  | 0.024618992 | 0.024977908 | 0.014994707 |
| ENSG00000128311 | 0.061912187 | 0.045543896 | 0.044076255 | 0.057912744 |
| ENSG00000167700 | 0.050827322 | 0.040867057 | 0.044582314 | 0.037761228 |
| ENSG00000178149 | 0.026008988 | 0.029953413 | 0.029738689 | 0.026302567 |
| ENSG00000100138 | 0.028247668 | 0.030463882 | 0.032615802 | 0.031212684 |
| ENSG00000189298 | 0.034067305 | 0.042650142 | 0.031690185 | 0.02979671  |

|                 |             |             |             |             |
|-----------------|-------------|-------------|-------------|-------------|
| ENSG00000124201 | 0.030382087 | 0.044434329 | 0.048095836 | 0.031124124 |
| ENSG00000091704 | 0.014983577 | 0.025822158 | 0.02480803  | 0.015899553 |
| ENSG00000177058 | 0.034258609 | 0.036937121 | 0.033708284 | 0.029589114 |
| ENSG00000166960 | 0.017563078 | 0.02674987  | 0.02528432  | 0.017298808 |
| ENSG00000100448 | 0.016590502 | 0.025012838 | 0.024283432 | 0.015379185 |
| ENSG00000213983 | 0.028936869 | 0.040959565 | 0.037525458 | 0.031309107 |
| ENSG00000186318 | 0.030932928 | 0.030154896 | 0.028913384 | 0.024887555 |
| ENSG00000112855 | 0.02967598  | 0.033590258 | 0.029416228 | 0.022884905 |
| ENSG00000127946 | 0.026871871 | 0.029267606 | 0.028035015 | 0.026939103 |
| ENSG00000166716 | 0.019798542 | 0.028090177 | 0.027536739 | 0.018399086 |
| ENSG00000157570 | 0.020948765 | 0.032225813 | 0.035659678 | 0.034550493 |
| ENSG00000183160 | 0.068344007 | 0.04034485  | 0.031445343 | 0.027564444 |
| ENSG00000156414 | 0.026413445 | 0.026404111 | 0.031361988 | 0.020474576 |
| ENSG00000105388 | 0.015854146 | 0.024807049 | 0.025100888 | 0.014797272 |
| ENSG00000182634 | 0.01635088  | 0.025908835 | 0.025903659 | 0.017761585 |
| ENSG00000171124 | 0.015313067 | 0.024581475 | 0.025025839 | 0.014652979 |
| ENSG00000147601 | 0.032367688 | 0.034624624 | 0.036189494 | 0.029514657 |
| ENSG00000162998 | 0.030784264 | 0.025778442 | 0.026494255 | 0.015878686 |
| ENSG00000160211 | 0.034246473 | 0.036560987 | 0.03613913  | 0.033572393 |
| ENSG00000120833 | 0.086274193 | 0.054713161 | 0.058333699 | 0.062419674 |
| ENSG00000156920 | 0.017795034 | 0.025890609 | 0.026497512 | 0.015673726 |
| ENSG00000081913 | 0.06408583  | 0.047071165 | 0.052598857 | 0.041981265 |
| ENSG00000158402 | 0.047214039 | 0.043143937 | 0.040985663 | 0.047568751 |
| ENSG00000167173 | 0.034821002 | 0.040729872 | 0.055063654 | 0.034387646 |
| ENSG00000174677 | 0.017480723 | 0.025579567 | 0.027282022 | 0.017087762 |
| ENSG00000163352 | 0.017226054 | 0.024630674 | 0.026604122 | 0.015021775 |
| ENSG00000180613 | 0.015374289 | 0.02562546  | 0.025432291 | 0.015519476 |
| ENSG00000012779 | 0.06986243  | 0.038170647 | 0.036046935 | 0.054982609 |
| ENSG00000137672 | 0.016277587 | 0.024915282 | 0.024925226 | 0.014948554 |
| ENSG00000162688 | 0.016133315 | 0.024471108 | 0.024498418 | 0.015051596 |
| ENSG00000171956 | 0.024600238 | 0.030001479 | 0.026500891 | 0.024624571 |
| ENSG00000183691 | 0.017522438 | 0.02583725  | 0.026131543 | 0.016587129 |
| ENSG00000157191 | 0.03160969  | 0.034232417 | 0.032578336 | 0.034334114 |
| ENSG00000188305 | 0.015618632 | 0.025068056 | 0.024625652 | 0.014081425 |
| ENSG00000089094 | 0.035229656 | 0.034349245 | 0.030158644 | 0.028509175 |
| ENSG00000148377 | 0.018835837 | 0.024513392 | 0.026483886 | 0.016546891 |
| ENSG00000135596 | 0.036901088 | 0.041246169 | 0.0353266   | 0.030967265 |
| ENSG00000149781 | 0.022592659 | 0.037323148 | 0.031193984 | 0.024258461 |
| ENSG00000179965 | 0.016668544 | 0.024072224 | 0.024685944 | 0.015388339 |
| ENSG00000184743 | 0.030625826 | 0.031547104 | 0.03364625  | 0.02916938  |
| ENSG00000162980 | 0.033638715 | 0.041219109 | 0.039290882 | 0.032335951 |
| ENSG00000139357 | 0.042903823 | 0.04211223  | 0.041087024 | 0.052173253 |
| ENSG00000152484 | 0.042735758 | 0.047521161 | 0.047569429 | 0.03183389  |
| ENSG00000135047 | 0.018574703 | 0.02465003  | 0.025438554 | 0.01653152  |
| ENSG00000126067 | 0.024320287 | 0.029188279 | 0.029241416 | 0.022872799 |
| ENSG00000106400 | 0.022986691 | 0.026495277 | 0.027019674 | 0.019771148 |
| ENSG00000142227 | 0.030433631 | 0.029909276 | 0.033498264 | 0.028305312 |
| ENSG00000120860 | 0.061074606 | 0.045965128 | 0.036725022 | 0.035897871 |
| ENSG00000165694 | 0.014934241 | 0.02524879  | 0.024124734 | 0.01506577  |
| ENSG00000197616 | 0.044202509 | 0.03214063  | 0.028445596 | 0.025766441 |
| ENSG00000108405 | 0.065973771 | 0.054694359 | 0.054470555 | 0.056315622 |
| ENSG00000157045 | 0.02330837  | 0.03059712  | 0.03151208  | 0.020605487 |
| ENSG00000189308 | 0.032174281 | 0.032970039 | 0.034558872 | 0.029761382 |
| ENSG00000186480 | 0.037983374 | 0.036526791 | 0.034635087 | 0.030488597 |

|                 |             |             |             |             |
|-----------------|-------------|-------------|-------------|-------------|
| ENSG00000136720 | 0.016410937 | 0.024790696 | 0.024986311 | 0.016127785 |
| ENSG00000130638 | 0.029467762 | 0.03218065  | 0.031708574 | 0.02595734  |
| ENSG00000144671 | 0.016989633 | 0.026154678 | 0.026162476 | 0.016633747 |
| ENSG00000197766 | 0.023282432 | 0.027412854 | 0.028169224 | 0.023128277 |
| ENSG00000128482 | 0.018547015 | 0.025453948 | 0.029172768 | 0.016592553 |
| ENSG00000110768 | 0.032242484 | 0.040138907 | 0.030813192 | 0.027300926 |
| ENSG00000114757 | 0.017419024 | 0.025578481 | 0.02495366  | 0.01694022  |
| ENSG00000666027 | 0.024403849 | 0.030335885 | 0.030936669 | 0.023862156 |
| ENSG00000163083 | 0.016482067 | 0.025379997 | 0.024856851 | 0.01537182  |
| ENSG00000185554 | 0.015096238 | 0.025716528 | 0.024667772 | 0.016258294 |
| ENSG00000100532 | 0.027078969 | 0.039316633 | 0.04383131  | 0.030180172 |
| ENSG00000118432 | 0.09008295  | 0.080559969 | 0.049986942 | 0.08013879  |
| ENSG00000132254 | 0.023260336 | 0.030399468 | 0.040189075 | 0.028127599 |
| ENSG00000133193 | 0.024407169 | 0.031505963 | 0.031557494 | 0.021570573 |
| ENSG00000127666 | 0.034082168 | 0.034709547 | 0.031606975 | 0.030333899 |
| ENSG00000118292 | 0.093124919 | 0.068446089 | 0.058755107 | 0.068326047 |
| ENSG00000196422 | 0.089399331 | 0.07124822  | 0.066183769 | 0.076530381 |
| ENSG00000172086 | 0.035675159 | 0.053361374 | 0.046160555 | 0.042968525 |
| ENSG00000117791 | 0.145732708 | 0.092192912 | 0.104885781 | 0.118592136 |
| ENSG00000103202 | 0.043374442 | 0.042881787 | 0.03803881  | 0.039169501 |
| ENSG00000121060 | 0.027185908 | 0.030031508 | 0.030738856 | 0.024326962 |
| ENSG00000249158 | 0.014811701 | 0.025133134 | 0.025106689 | 0.015828614 |
| ENSG00000160593 | 0.086355337 | 0.080388766 | 0.071083986 | 0.092917995 |
| ENSG00000173452 | 0.021070903 | 0.026218911 | 0.028681489 | 0.01894124  |
| ENSG00000178338 | 0.036472726 | 0.031922304 | 0.032540636 | 0.03270119  |
| ENSG00000186472 | 0.015517495 | 0.023591816 | 0.024217284 | 0.013916958 |
| ENSG00000182352 | 0.015658161 | 0.02587418  | 0.024194606 | 0.01750665  |
| ENSG00000090104 | 0.051082677 | 0.046004968 | 0.048282838 | 0.040958281 |
| ENSG0000068745  | 0.027750609 | 0.03091003  | 0.036982391 | 0.026522222 |
| ENSG00000160049 | 0.030609154 | 0.032090062 | 0.030995126 | 0.025464727 |
| ENSG00000102878 | 0.073437058 | 0.061129107 | 0.045286393 | 0.065836106 |
| ENSG00000099992 | 0.024809443 | 0.033945367 | 0.031269686 | 0.02572202  |
| ENSG00000135365 | 0.035075902 | 0.034959401 | 0.033982094 | 0.0267959   |
| ENSG00000167716 | 0.033456678 | 0.036656347 | 0.042759512 | 0.034879565 |
| ENSG00000100784 | 0.016627818 | 0.025571128 | 0.025268366 | 0.014400198 |
| ENSG00000167323 | 0.026705277 | 0.031159877 | 0.033880396 | 0.027769912 |
| ENSG00000079557 | 0.015771526 | 0.024952124 | 0.025494058 | 0.016195187 |
| ENSG00000135070 | 0.029494466 | 0.034034203 | 0.032221715 | 0.027557625 |
| ENSG00000196352 | 0.049538689 | 0.051173953 | 0.04443434  | 0.050344933 |
| ENSG00000197498 | 0.024752712 | 0.02874998  | 0.027620726 | 0.0252224   |
| ENSG00000113248 | 0.015606818 | 0.026696231 | 0.025265659 | 0.015807224 |
| ENSG00000106330 | 0.037819782 | 0.039525297 | 0.034208989 | 0.029652085 |
| ENSG00000149480 | 0.026568998 | 0.029774911 | 0.038000341 | 0.029604797 |
| ENSG00000186115 | 0.035271074 | 0.031724086 | 0.027185231 | 0.024847744 |
| ENSG00000159231 | 0.064819137 | 0.054580353 | 0.051095932 | 0.02608449  |
| ENSG00000133466 | 0.023415143 | 0.030006106 | 0.030040018 | 0.02782965  |
| ENSG00000075399 | 0.024464617 | 0.027885852 | 0.030427812 | 0.020829602 |
| ENSG00000167363 | 0.046193227 | 0.049390085 | 0.039378761 | 0.05790517  |
| ENSG00000101417 | 0.02166164  | 0.028676367 | 0.027606321 | 0.022033308 |
| ENSG00000129535 | 0.016784464 | 0.025011228 | 0.024866579 | 0.015373035 |
| ENSG00000151470 | 0.036971745 | 0.039671894 | 0.032984839 | 0.039191568 |
| ENSG00000167549 | 0.026895638 | 0.030020199 | 0.029587435 | 0.028076877 |
| ENSG00000184160 | 0.017351279 | 0.026066436 | 0.024646022 | 0.015449476 |
| ENSG00000135502 | 0.01529218  | 0.024877893 | 0.024789039 | 0.014552021 |

|                 |             |             |             |             |
|-----------------|-------------|-------------|-------------|-------------|
| ENSG00000174672 | 0.015311238 | 0.024861375 | 0.024372867 | 0.015258028 |
| ENSG00000182747 | 0.018512914 | 0.02649789  | 0.025520374 | 0.016670158 |
| ENSG00000132514 | 0.023438918 | 0.026511616 | 0.025394742 | 0.020326483 |
| ENSG00000170471 | 0.023858363 | 0.032115917 | 0.032540998 | 0.02199838  |
| ENSG00000113262 | 0.014846895 | 0.024236213 | 0.024393387 | 0.014305603 |
| ENSG00000168758 | 0.022873168 | 0.031546573 | 0.030548027 | 0.022536499 |
| ENSG00000108587 | 0.022050618 | 0.033316405 | 0.034763224 | 0.020338221 |
| ENSG00000198420 | 0.024521799 | 0.038318313 | 0.030893579 | 0.029524555 |
| ENSG00000136425 | 0.0195871   | 0.025801525 | 0.025217905 | 0.01728626  |
| ENSG00000243468 | 0.017298964 | 0.026754268 | 0.026930528 | 0.015405547 |
| ENSG00000149016 | 0.024950691 | 0.029986428 | 0.030421142 | 0.022787855 |
| ENSG00000149972 | 0.018156877 | 0.027096617 | 0.024657207 | 0.017318331 |
| ENSG00000170889 | 0.017512069 | 0.025217207 | 0.026055356 | 0.018319394 |
| ENSG00000155099 | 0.035257308 | 0.033553899 | 0.033745357 | 0.034020973 |
| ENSG00000164266 | 0.016105711 | 0.024756462 | 0.026013901 | 0.01613679  |
| ENSG00000167123 | 0.032887351 | 0.046388482 | 0.038571154 | 0.046739858 |
| ENSG00000149269 | 0.040524959 | 0.038983182 | 0.033423874 | 0.026823672 |
| ENSG00000162073 | 0.054730303 | 0.048589822 | 0.041806137 | 0.043393725 |
| ENSG00000116711 | 0.091978556 | 0.080227528 | 0.078139116 | 0.073792938 |
| ENSG00000185875 | 0.05830762  | 0.055094483 | 0.045855581 | 0.04038087  |
| ENSG00000116819 | 0.01581956  | 0.025319288 | 0.024576246 | 0.015544187 |
| ENSG00000146216 | 0.017303289 | 0.025028424 | 0.026724822 | 0.0171918   |
| ENSG00000159184 | 0.015472879 | 0.025682722 | 0.025889066 | 0.01399348  |
| ENSG00000178607 | 0.016864149 | 0.025670842 | 0.026492198 | 0.015516301 |
| ENSG00000196588 | 0.034859205 | 0.040929428 | 0.040583274 | 0.040155584 |
| ENSG00000116741 | 0.119139332 | 0.087045384 | 0.090011187 | 0.095879634 |
| ENSG00000213699 | 0.015612799 | 0.024145723 | 0.02422251  | 0.015441593 |
| ENSG00000067955 | 0.031163947 | 0.032722595 | 0.031657328 | 0.025006056 |
| ENSG00000180828 | 0.020297462 | 0.025964375 | 0.025864555 | 0.020213874 |
| ENSG00000135617 | 0.031847391 | 0.033736096 | 0.032236898 | 0.029893807 |
| ENSG00000240432 | 0.015265883 | 0.025166329 | 0.024073804 | 0.014377799 |
| ENSG00000131979 | 0.038772146 | 0.04690149  | 0.046846102 | 0.038304449 |
| ENSG00000136059 | 0.028758702 | 0.034766199 | 0.030520895 | 0.025548013 |
| ENSG00000158008 | 0.016043868 | 0.025576314 | 0.025972313 | 0.014811079 |
| ENSG00000147324 | 0.058399889 | 0.048897332 | 0.046636779 | 0.053745992 |
| ENSG00000109705 | 0.015269292 | 0.025011691 | 0.024700268 | 0.014639552 |
| ENSG00000197223 | 0.081944121 | 0.077274762 | 0.09452856  | 0.067754622 |
| ENSG00000140105 | 0.037695332 | 0.038842589 | 0.03622328  | 0.033989658 |
| ENSG00000174992 | 0.016099827 | 0.0264735   | 0.024834439 | 0.015500484 |
| ENSG00000150907 | 0.053961578 | 0.051022214 | 0.045733799 | 0.042467529 |
| ENSG00000141499 | 0.027150881 | 0.029757338 | 0.030095456 | 0.024497006 |
| ENSG00000173786 | 0.024303635 | 0.031328146 | 0.034640344 | 0.027339236 |
| ENSG00000162367 | 0.017018394 | 0.026978244 | 0.026542247 | 0.01697651  |
| ENSG00000051009 | 0.036518116 | 0.034473196 | 0.035912652 | 0.033545576 |
| ENSG00000185955 | 0.029406079 | 0.032219666 | 0.031877991 | 0.026942174 |
| ENSG00000166856 | 0.014883814 | 0.02428354  | 0.024470452 | 0.013656576 |
| ENSG00000132464 | 0.021608714 | 0.028238062 | 0.025908878 | 0.01878238  |
| ENSG00000105939 | 0.030586048 | 0.032798547 | 0.040774634 | 0.029709478 |
| ENSG00000068097 | 0.040718385 | 0.038494663 | 0.035536361 | 0.035900463 |
| ENSG00000170516 | 0.017458862 | 0.027149401 | 0.025658765 | 0.015397591 |
| ENSG00000134970 | 0.035369379 | 0.039048188 | 0.041273547 | 0.039948567 |
| ENSG00000167863 | 0.024365771 | 0.028936413 | 0.026784804 | 0.018351203 |
| ENSG00000100413 | 0.03345532  | 0.035377528 | 0.037323291 | 0.038523028 |
| ENSG00000175414 | 0.017264866 | 0.02657894  | 0.025088928 | 0.015344577 |

|                 |             |             |             |             |
|-----------------|-------------|-------------|-------------|-------------|
| ENSG0000034713  | 0.025500414 | 0.029531465 | 0.02987199  | 0.021584643 |
| ENSG00000152465 | 0.060089804 | 0.049592082 | 0.048832008 | 0.055785742 |
| ENSG00000141384 | 0.044311634 | 0.039971189 | 0.040116369 | 0.037955207 |
| ENSG00000101199 | 0.025440555 | 0.037883482 | 0.047048599 | 0.027999819 |
| ENSG00000063241 | 0.049984391 | 0.031184141 | 0.035440703 | 0.03874005  |
| ENSG00000157470 | 0.07010108  | 0.0680379   | 0.069186122 | 0.06780515  |
| ENSG00000167112 | 0.025865643 | 0.031441211 | 0.033544963 | 0.025907364 |
| ENSG00000117054 | 0.022046357 | 0.027340707 | 0.028449922 | 0.021708175 |
| ENSG00000137634 | 0.016572982 | 0.025366578 | 0.024571199 | 0.01564914  |
| ENSG00000179008 | 0.019680104 | 0.025908758 | 0.024587788 | 0.018241206 |
| ENSG00000138083 | 0.057928182 | 0.07652153  | 0.055414901 | 0.071009924 |
| ENSG00000216490 | 0.033506899 | 0.036803077 | 0.033296607 | 0.032305069 |
| ENSG00000131737 | 0.015954375 | 0.025488974 | 0.025077219 | 0.014929851 |
| ENSG00000096654 | 0.035398426 | 0.035361959 | 0.037386355 | 0.024643948 |
| ENSG00000163166 | 0.029593018 | 0.035878114 | 0.033643253 | 0.024646047 |
| ENSG00000196782 | 0.017743555 | 0.026318488 | 0.026391644 | 0.015559187 |
| ENSG00000187049 | 0.032972681 | 0.037648602 | 0.038637391 | 0.033146612 |
| ENSG00000172867 | 0.016267239 | 0.02542288  | 0.025294435 | 0.015882547 |
| ENSG00000165912 | 0.018941661 | 0.028726151 | 0.02598106  | 0.016748486 |
| ENSG00000127952 | 0.037420401 | 0.038024646 | 0.035831523 | 0.035177802 |
| ENSG00000203872 | 0.018945368 | 0.026926655 | 0.027266183 | 0.016143284 |
| ENSG00000139842 | 0.027609611 | 0.034984347 | 0.029265276 | 0.022476794 |
| ENSG00000180479 | 0.03021509  | 0.034343186 | 0.033729673 | 0.025219321 |
| ENSG00000181192 | 0.032817313 | 0.03506762  | 0.035491992 | 0.03401253  |
| ENSG00000225190 | 0.029004756 | 0.036004632 | 0.036006053 | 0.025116715 |
| ENSG00000173253 | 0.029595187 | 0.025433498 | 0.024668269 | 0.022956157 |
| ENSG00000137225 | 0.01571174  | 0.024784454 | 0.02503222  | 0.016510528 |
| ENSG00000156006 | 0.01798553  | 0.024974599 | 0.025286748 | 0.015885696 |
| ENSG00000184113 | 0.017778027 | 0.025791071 | 0.025153746 | 0.014974285 |
| ENSG00000092020 | 0.029482286 | 0.036193857 | 0.03358193  | 0.025034852 |
| ENSG00000126467 | 0.021890807 | 0.036509465 | 0.027066263 | 0.026193739 |
| ENSG00000128965 | 0.069868922 | 0.066404271 | 0.072925845 | 0.069124278 |
| ENSG00000183775 | 0.017310062 | 0.026935119 | 0.026504277 | 0.017921341 |
| ENSG00000100865 | 0.026617515 | 0.028812545 | 0.033514469 | 0.031944106 |
| ENSG00000132436 | 0.042527566 | 0.046689188 | 0.037555365 | 0.040001381 |
| ENSG00000106009 | 0.033267005 | 0.036491774 | 0.038703371 | 0.028086251 |
| ENSG00000123728 | 0.026710541 | 0.033045008 | 0.033677679 | 0.023249538 |
| ENSG00000152217 | 0.107160934 | 0.076650167 | 0.058334234 | 0.084321099 |
| ENSG00000141048 | 0.017492281 | 0.02537347  | 0.025860448 | 0.015341145 |
| ENSG00000189171 | 0.069214779 | 0.07663343  | 0.066011398 | 0.06501992  |
| ENSG00000155034 | 0.015717258 | 0.024453621 | 0.024525394 | 0.0169296   |
| ENSG00000108773 | 0.03005563  | 0.035058657 | 0.035666367 | 0.025752951 |
| ENSG00000132840 | 0.016162566 | 0.024711709 | 0.024799743 | 0.015522621 |
| ENSG00000197603 | 0.033498062 | 0.041902618 | 0.03113448  | 0.026375601 |
| ENSG00000120693 | 0.017542737 | 0.024662903 | 0.025510142 | 0.014910047 |
| ENSG00000100280 | 0.029084926 | 0.035526014 | 0.031997006 | 0.034546135 |
| ENSG00000196381 | 0.015692846 | 0.02423655  | 0.024607759 | 0.015522996 |
| ENSG00000101115 | 0.015220691 | 0.024435194 | 0.024365411 | 0.015811156 |
| ENSG00000174567 | 0.033788306 | 0.042440708 | 0.035477346 | 0.034475259 |
| ENSG00000141510 | 0.033989888 | 0.03509195  | 0.03596134  | 0.035258793 |
| ENSG00000213719 | 0.026055467 | 0.027998427 | 0.030082588 | 0.018506088 |
| ENSG00000159713 | 0.015826497 | 0.024641063 | 0.024911415 | 0.014995676 |
| ENSG00000119185 | 0.03111898  | 0.036113058 | 0.033930869 | 0.026319356 |
| ENSG00000156735 | 0.025257241 | 0.027695053 | 0.03520555  | 0.024387376 |



|                 |             |             |             |             |
|-----------------|-------------|-------------|-------------|-------------|
| ENSG00000130702 | 0.085569572 | 0.076170231 | 0.064117216 | 0.079822617 |
| ENSG00000107960 | 0.031786332 | 0.030648565 | 0.034562264 | 0.026796196 |
| ENSG00000183643 | 0.018916209 | 0.027316903 | 0.026776681 | 0.016131727 |
| ENSG00000170866 | 0.047916639 | 0.033475428 | 0.027700924 | 0.020027546 |
| ENSG00000137090 | 0.02970318  | 0.027219184 | 0.026869622 | 0.018191439 |
| ENSG00000172061 | 0.015978548 | 0.024874135 | 0.024116216 | 0.016402975 |
| ENSG00000157693 | 0.050234695 | 0.044403478 | 0.04605653  | 0.053651468 |
| ENSG00000096070 | 0.037702629 | 0.040698929 | 0.047083514 | 0.034344847 |
| ENSG00000167220 | 0.04169124  | 0.041825027 | 0.041506668 | 0.032108561 |
| ENSG00000184216 | 0.032525064 | 0.03574066  | 0.036671056 | 0.03173756  |
| ENSG00000187624 | 0.119731746 | 0.115914597 | 0.113840688 | 0.090366082 |
| ENSG00000104129 | 0.027540225 | 0.032483925 | 0.029692648 | 0.022464588 |
| ENSG00000152591 | 0.014396873 | 0.02412345  | 0.024557628 | 0.014201751 |
| ENSG00000145863 | 0.016078912 | 0.025998287 | 0.024491544 | 0.016341374 |
| ENSG00000183684 | 0.03281071  | 0.029555822 | 0.029942478 | 0.029884652 |
| ENSG00000164398 | 0.015805012 | 0.025067304 | 0.024940533 | 0.015504189 |
| ENSG00000176787 | 0.018122105 | 0.027097189 | 0.02684766  | 0.018143944 |
| ENSG00000144847 | 0.015482713 | 0.025085801 | 0.025155563 | 0.015042448 |
| ENSG00000214128 | 0.017700653 | 0.024929137 | 0.025528065 | 0.015774949 |
| ENSG00000128059 | 0.031978596 | 0.035571862 | 0.031623704 | 0.021939223 |
| ENSG00000168487 | 0.022952385 | 0.031423624 | 0.029811878 | 0.024303393 |
| ENSG00000136936 | 0.027098895 | 0.037883418 | 0.038982127 | 0.027549015 |
| ENSG00000188636 | 0.11170547  | 0.081236943 | 0.06487301  | 0.08026463  |
| ENSG00000214655 | 0.039613569 | 0.040312362 | 0.040046919 | 0.036368634 |
| ENSG00000213316 | 0.05814501  | 0.052294874 | 0.042490491 | 0.060727665 |
| ENSG00000185518 | 0.11391624  | 0.065060177 | 0.067645868 | 0.093450133 |
| ENSG00000086506 | 0.028065734 | 0.029709192 | 0.027974986 | 0.028683543 |
| ENSG00000170683 | 0.015498681 | 0.024869983 | 0.024441748 | 0.014088235 |
| ENSG00000120802 | 0.052943604 | 0.060274816 | 0.043107981 | 0.060346697 |
| ENSG00000172167 | 0.034665381 | 0.033996155 | 0.029307443 | 0.0293445   |
| ENSG00000185262 | 0.042443595 | 0.043247139 | 0.047895091 | 0.032378518 |
| ENSG00000066629 | 0.028898248 | 0.028204142 | 0.02559382  | 0.023536584 |
| ENSG00000144736 | 0.029519811 | 0.036221782 | 0.03629609  | 0.031963351 |
| ENSG00000110871 | 0.029401064 | 0.034380623 | 0.031642281 | 0.022487241 |
| ENSG00000182866 | 0.053311345 | 0.045397631 | 0.041983457 | 0.065414127 |
| ENSG00000061938 | 0.043059003 | 0.048058586 | 0.038695933 | 0.039070201 |
| ENSG00000115073 | 0.031647286 | 0.033205303 | 0.030583724 | 0.028808899 |
| ENSG00000167978 | 0.024861472 | 0.03247382  | 0.03695222  | 0.027476036 |
| ENSG00000154040 | 0.077184468 | 0.060122332 | 0.057440452 | 0.062072524 |
| ENSG00000168356 | 0.032371662 | 0.035760717 | 0.037434606 | 0.033789812 |
| ENSG00000100354 | 0.020420135 | 0.028637711 | 0.032392953 | 0.022209331 |
| ENSG00000109991 | 0.016609653 | 0.026091856 | 0.02513059  | 0.016239305 |
| ENSG00000189050 | 0.035699866 | 0.042900568 | 0.037493458 | 0.038219147 |
| ENSG00000171433 | 0.014576352 | 0.024455444 | 0.024291241 | 0.013282949 |
| ENSG00000167291 | 0.021436468 | 0.02662444  | 0.027550564 | 0.019479879 |
| ENSG00000187097 | 0.022429178 | 0.026218325 | 0.026362785 | 0.017474038 |
| ENSG00000171201 | 0.015723125 | 0.025160213 | 0.024893678 | 0.015377294 |
| ENSG00000198001 | 0.028323208 | 0.034049213 | 0.032826849 | 0.021698525 |
| ENSG00000168152 | 0.021682206 | 0.02642388  | 0.028959306 | 0.022425036 |
| ENSG00000141905 | 0.021060017 | 0.027947548 | 0.026878899 | 0.023085657 |
| ENSG00000126778 | 0.01653449  | 0.026003272 | 0.024857607 | 0.015024883 |
| ENSG00000161055 | 0.062763421 | 0.052326597 | 0.030973134 | 0.04873854  |
| ENSG00000134982 | 0.02276813  | 0.030760167 | 0.027435804 | 0.020504511 |
| ENSG00000221886 | 0.041108767 | 0.062140055 | 0.045575256 | 0.043592576 |

|                 |             |             |             |             |
|-----------------|-------------|-------------|-------------|-------------|
| ENSG00000178110 | 0.015774213 | 0.025415083 | 0.024720979 | 0.015103582 |
| ENSG00000125850 | 0.028795743 | 0.030291653 | 0.029414852 | 0.028382638 |
| ENSG00000188162 | 0.018667055 | 0.025953466 | 0.029236065 | 0.020987546 |
| ENSG00000100592 | 0.065123607 | 0.057769665 | 0.047751341 | 0.047425552 |
| ENSG00000162032 | 0.02252823  | 0.028851035 | 0.033662292 | 0.025209135 |
| ENSG00000184402 | 0.016490421 | 0.025713605 | 0.026825652 | 0.01608492  |
| ENSG00000156411 | 0.026141576 | 0.032093056 | 0.029304768 | 0.023177767 |
| ENSG00000146904 | 0.017382888 | 0.02471835  | 0.025573466 | 0.016458469 |
| ENSG00000142330 | 0.018993671 | 0.026560374 | 0.025650647 | 0.019710463 |
| ENSG00000126858 | 0.035561371 | 0.05224956  | 0.041000728 | 0.031264317 |
| ENSG00000088367 | 0.014493256 | 0.024877595 | 0.024553327 | 0.01546901  |
| ENSG00000166813 | 0.063313422 | 0.060326098 | 0.038264801 | 0.064617162 |
| ENSG00000144724 | 0.10287471  | 0.060499061 | 0.033828333 | 0.047727494 |
| ENSG00000085721 | 0.03190515  | 0.035560971 | 0.036454947 | 0.030309358 |
| ENSG00000165502 | 0.020423044 | 0.034284717 | 0.027532332 | 0.022605239 |
| ENSG00000198937 | 0.025094047 | 0.031324709 | 0.03231205  | 0.026605196 |
| ENSG00000181449 | 0.018012778 | 0.028090647 | 0.027728944 | 0.019272116 |
| ENSG00000102967 | 0.036577823 | 0.034841129 | 0.030393585 | 0.022705832 |
| ENSG00000120094 | 0.018930474 | 0.025578255 | 0.025951253 | 0.016074435 |
| ENSG00000179119 | 0.040534099 | 0.038483903 | 0.048114558 | 0.036442541 |
| ENSG00000110717 | 0.021712696 | 0.027006215 | 0.027399014 | 0.020529957 |
| ENSG00000142731 | 0.044099817 | 0.038222838 | 0.034515129 | 0.030679066 |
| ENSG00000182578 | 0.059160706 | 0.051179529 | 0.045187899 | 0.065514899 |
| ENSG00000141434 | 0.015410056 | 0.024301683 | 0.024935195 | 0.015201366 |
| ENSG00000128872 | 0.027313767 | 0.034448427 | 0.031160595 | 0.027929233 |
| ENSG00000143595 | 0.015786814 | 0.024362349 | 0.024924661 | 0.014450509 |
| ENSG00000158125 | 0.017665453 | 0.025207292 | 0.023872521 | 0.014987132 |
| ENSG00000136861 | 0.030720042 | 0.043534782 | 0.038456036 | 0.038807873 |
| ENSG00000160185 | 0.035980277 | 0.033683733 | 0.030066231 | 0.030460485 |
| ENSG00000117152 | 0.016229564 | 0.025161151 | 0.024257208 | 0.016171677 |
| ENSG00000125895 | 0.020532904 | 0.026626184 | 0.028525926 | 0.029570214 |
| ENSG00000134153 | 0.023967221 | 0.02900101  | 0.033010725 | 0.023481386 |
| ENSG00000074370 | 0.047225844 | 0.040523202 | 0.044785447 | 0.035481851 |
| ENSG00000125888 | 0.015519514 | 0.024423698 | 0.025432954 | 0.015974414 |
| ENSG00000214517 | 0.045372819 | 0.037446631 | 0.035990264 | 0.03648298  |
| ENSG00000151789 | 0.019854492 | 0.02832769  | 0.027908642 | 0.019478535 |
| ENSG00000153896 | 0.01625303  | 0.025848606 | 0.025016831 | 0.018300955 |
| ENSG00000131558 | 0.026126553 | 0.030078203 | 0.032102904 | 0.023585133 |
| ENSG00000167552 | 0.045342333 | 0.048534735 | 0.033610153 | 0.044359306 |
| ENSG00000073536 | 0.041222225 | 0.045872825 | 0.049970199 | 0.034300131 |
| ENSG00000181804 | 0.029445487 | 0.032548944 | 0.030611941 | 0.025780026 |
| ENSG00000185594 | 0.016357946 | 0.025541367 | 0.026254732 | 0.015193217 |
| ENSG00000165246 | 0.107362889 | 0.113391932 | 0.084380631 | 0.101251084 |
| ENSG00000221946 | 0.015700491 | 0.02453891  | 0.024813815 | 0.015526688 |
| ENSG00000182836 | 0.015829692 | 0.024311531 | 0.025193772 | 0.014491256 |
| ENSG00000179988 | 0.023253858 | 0.028040931 | 0.027794772 | 0.021564588 |
| ENSG00000166831 | 0.166290929 | 0.113349064 | 0.114368238 | 0.137246964 |
| ENSG00000198799 | 0.028052814 | 0.034685596 | 0.033367516 | 0.026665069 |
| ENSG00000167741 | 0.017952154 | 0.026128913 | 0.026582231 | 0.017540427 |
| ENSG00000196468 | 0.016768081 | 0.025562119 | 0.02525782  | 0.014802103 |
| ENSG00000164038 | 0.032621606 | 0.041530441 | 0.031255532 | 0.023957559 |
| ENSG00000160959 | 0.038215738 | 0.041768866 | 0.039267202 | 0.031707474 |
| ENSG00000125871 | 0.032433848 | 0.036922183 | 0.032013256 | 0.025134187 |
| ENSG00000169020 | 0.025426341 | 0.0308089   | 0.029400084 | 0.02469468  |

|                 |             |             |             |             |
|-----------------|-------------|-------------|-------------|-------------|
| ENSG0000070950  | 0.024279192 | 0.02938014  | 0.029418777 | 0.023004111 |
| ENSG00000171462 | 0.016888449 | 0.025318545 | 0.025243391 | 0.01517161  |
| ENSG00000127688 | 0.016015605 | 0.025365827 | 0.026392201 | 0.01543472  |
| ENSG0000075415  | 0.034249392 | 0.039994635 | 0.039098172 | 0.036327837 |
| ENSG00000144043 | 0.027023731 | 0.031030503 | 0.03791996  | 0.0321264   |
| ENSG0000052126  | 0.036603016 | 0.025830244 | 0.025288809 | 0.01617427  |
| ENSG00000112983 | 0.01493414  | 0.025125405 | 0.025739959 | 0.01560545  |
| ENSG00000198538 | 0.013943713 | 0.023268802 | 0.023869161 | 0.01350916  |
| ENSG00000131236 | 0.018630783 | 0.027432992 | 0.026630805 | 0.01858277  |
| ENSG00000126787 | 0.04403211  | 0.043720308 | 0.036949109 | 0.035192448 |
| ENSG00000237077 | 0.014450626 | 0.024088517 | 0.024035573 | 0.014655891 |
| ENSG00000146859 | 0.067169282 | 0.05348084  | 0.056438274 | 0.060485404 |
| ENSG00000123179 | 0.033653855 | 0.032894964 | 0.030908461 | 0.032273229 |
| ENSG00000007264 | 0.015810304 | 0.02546367  | 0.025489045 | 0.016321675 |
| ENSG00000113161 | 0.035152297 | 0.042788553 | 0.033530236 | 0.034741128 |
| ENSG00000166377 | 0.025301258 | 0.02873675  | 0.028540566 | 0.022825699 |
| ENSG00000241935 | 0.046941873 | 0.031681487 | 0.03118416  | 0.043937302 |
| ENSG00000186118 | 0.014381236 | 0.023549413 | 0.024133212 | 0.014119496 |
| ENSG00000162604 | 0.029916105 | 0.0364698   | 0.032921881 | 0.028873911 |
| ENSG00000129159 | 0.015989175 | 0.0249253   | 0.025199456 | 0.014980624 |
| ENSG00000187325 | 0.036775531 | 0.042701647 | 0.036970233 | 0.040541509 |
| ENSG00000179046 | 0.016425042 | 0.024909529 | 0.025618816 | 0.015829936 |
| ENSG00000082516 | 0.038205238 | 0.042914532 | 0.035642145 | 0.029099077 |
| ENSG00000125650 | 0.017949915 | 0.025665199 | 0.024428275 | 0.015812384 |
| ENSG00000122068 | 0.030103703 | 0.036704983 | 0.034693673 | 0.030177721 |
| ENSG00000101188 | 0.015427077 | 0.025406463 | 0.025827421 | 0.016566306 |
| ENSG00000176922 | 0.016687144 | 0.026820727 | 0.025754343 | 0.017756129 |
| ENSG00000158669 | 0.027268607 | 0.033239106 | 0.037055289 | 0.025961787 |
| ENSG00000171817 | 0.019662401 | 0.027151587 | 0.026752118 | 0.023845418 |
| ENSG00000176887 | 0.018799552 | 0.026823861 | 0.027071486 | 0.016863454 |
| ENSG00000175048 | 0.111998754 | 0.100111557 | 0.083003457 | 0.076611209 |
| ENSG00000165092 | 0.017281943 | 0.026244432 | 0.024732491 | 0.0152863   |
| ENSG00000169410 | 0.015679395 | 0.025417281 | 0.024662546 | 0.016689785 |
| ENSG00000181761 | 0.016109448 | 0.025139034 | 0.025062975 | 0.014977717 |
| ENSG00000185013 | 0.016471412 | 0.025933295 | 0.025478236 | 0.016489965 |
| ENSG00000153443 | 0.032805967 | 0.044545984 | 0.048751724 | 0.038410405 |
| ENSG00000151388 | 0.015706414 | 0.024751399 | 0.024935992 | 0.014855249 |
| ENSG00000090054 | 0.035286282 | 0.044323849 | 0.03882586  | 0.059192073 |
| ENSG00000127418 | 0.054395515 | 0.055461916 | 0.05459183  | 0.051986438 |
| ENSG00000183615 | 0.016124176 | 0.025335802 | 0.026189703 | 0.016035727 |
| ENSG00000215864 | 0.015677102 | 0.025431238 | 0.025148314 | 0.015721711 |
| ENSG00000100216 | 0.026009753 | 0.030372873 | 0.029001387 | 0.020832608 |
| ENSG00000101144 | 0.016721078 | 0.02423714  | 0.02624343  | 0.01625903  |
| ENSG00000131650 | 0.034953586 | 0.041155731 | 0.031240268 | 0.037204458 |
| ENSG00000104826 | 0.016128209 | 0.024592467 | 0.025498144 | 0.016398788 |
| ENSG00000167193 | 0.036163907 | 0.034612485 | 0.035273829 | 0.030722238 |
| ENSG00000103932 | 0.032612197 | 0.036418424 | 0.030154653 | 0.029258255 |
| ENSG00000136574 | 0.02362816  | 0.029764622 | 0.028981564 | 0.021076849 |
| ENSG00000186222 | 0.024512881 | 0.034329242 | 0.032264344 | 0.020385576 |
| ENSG00000177464 | 0.014911401 | 0.025164464 | 0.025290003 | 0.015655383 |
| ENSG00000179603 | 0.110377633 | 0.074422756 | 0.059048626 | 0.078815572 |
| ENSG00000188536 | 0.016741517 | 0.025428625 | 0.024789454 | 0.025269971 |
| ENSG00000156885 | 0.014369077 | 0.024227151 | 0.024450575 | 0.014264064 |
| ENSG00000147400 | 0.029849704 | 0.035776843 | 0.029674865 | 0.030340637 |

|                 |             |             |             |             |
|-----------------|-------------|-------------|-------------|-------------|
| ENSG00000107618 | 0.020435422 | 0.028134611 | 0.026241779 | 0.01735654  |
| ENSG00000124490 | 0.015784543 | 0.025066537 | 0.024620042 | 0.015250915 |
| ENSG00000069764 | 0.015306864 | 0.025020822 | 0.024765609 | 0.014904211 |
| ENSG00000169255 | 0.019199195 | 0.028138318 | 0.027441728 | 0.017874548 |
| ENSG00000143374 | 0.02404796  | 0.028131245 | 0.031197319 | 0.022869888 |
| ENSG00000162373 | 0.056330421 | 0.10200357  | 0.107114067 | 0.108518999 |
| ENSG00000198881 | 0.015722236 | 0.027165487 | 0.025495235 | 0.016097657 |
| ENSG00000164494 | 0.032600573 | 0.034603832 | 0.031327052 | 0.026266508 |
| ENSG00000176842 | 0.016707519 | 0.025050111 | 0.025785014 | 0.015669872 |
| ENSG00000140263 | 0.033664364 | 0.035594405 | 0.030679076 | 0.029644615 |
| ENSG00000008277 | 0.015959972 | 0.024671544 | 0.024674384 | 0.016071532 |
| ENSG00000138792 | 0.024100497 | 0.031204338 | 0.025808807 | 0.016674727 |
| ENSG00000130560 | 0.024523933 | 0.030994692 | 0.028724622 | 0.022841034 |
| ENSG00000148655 | 0.116848985 | 0.091965277 | 0.059723422 | 0.068335934 |
| ENSG00000135587 | 0.022915348 | 0.026561112 | 0.029522541 | 0.02045022  |
| ENSG00000112294 | 0.051039577 | 0.05236248  | 0.055739408 | 0.056830083 |
| ENSG00000174010 | 0.021064137 | 0.027468962 | 0.030803705 | 0.017743166 |
| ENSG00000103381 | 0.051220436 | 0.039340642 | 0.036058883 | 0.037549321 |
| ENSG00000242185 | 0.211503785 | 0.180000038 | 0.193335496 | 0.203610925 |
| ENSG00000116833 | 0.018724262 | 0.027278175 | 0.025880309 | 0.01817133  |
| ENSG00000198056 | 0.047584521 | 0.042474303 | 0.03484635  | 0.029295524 |
| ENSG00000173821 | 0.059719308 | 0.078506675 | 0.055460609 | 0.057956913 |
| ENSG00000163576 | 0.01714842  | 0.026549696 | 0.025271126 | 0.019721741 |
| ENSG00000130762 | 0.015800774 | 0.024638688 | 0.024612946 | 0.014358894 |
| ENSG00000100883 | 0.026209582 | 0.031814159 | 0.030741347 | 0.02408938  |
| ENSG00000138161 | 0.028553615 | 0.028228665 | 0.025957175 | 0.018612543 |
| ENSG00000244617 | 0.018137791 | 0.026900368 | 0.024957492 | 0.016662517 |
| ENSG00000141519 | 0.016986255 | 0.026422789 | 0.026571458 | 0.016854281 |
| ENSG00000119777 | 0.030224821 | 0.030157834 | 0.038531795 | 0.028371241 |
| ENSG00000127184 | 0.014443672 | 0.024113433 | 0.024590498 | 0.016354111 |
| ENSG00000169084 | 0.024287711 | 0.027599819 | 0.02610804  | 0.027768926 |
| ENSG00000132855 | 0.014695019 | 0.023821097 | 0.024074681 | 0.014454512 |
| ENSG00000135847 | 0.026539043 | 0.029210845 | 0.030085101 | 0.023157098 |
| ENSG00000163638 | 0.016732992 | 0.025118021 | 0.024747581 | 0.015233761 |
| ENSG00000106351 | 0.031793137 | 0.03366418  | 0.029365832 | 0.02945117  |
| ENSG00000167972 | 0.044642037 | 0.045479971 | 0.031599612 | 0.048027482 |
| ENSG00000161618 | 0.033733582 | 0.035906102 | 0.03612934  | 0.034459405 |
| ENSG00000128165 | 0.016332571 | 0.02641867  | 0.026748174 | 0.017377101 |
| ENSG00000100220 | 0.024550267 | 0.033469671 | 0.033935856 | 0.025021067 |
| ENSG00000187164 | 0.06895365  | 0.04903965  | 0.041966155 | 0.061684977 |
| ENSG00000177225 | 0.033834287 | 0.035612087 | 0.032059241 | 0.029025464 |
| ENSG00000163378 | 0.046470305 | 0.045491438 | 0.046206365 | 0.051852825 |
| ENSG00000104408 | 0.018245347 | 0.026765069 | 0.025896999 | 0.018096795 |
| ENSG00000089195 | 0.033704174 | 0.043008768 | 0.040655479 | 0.03693131  |
| ENSG00000048707 | 0.018425073 | 0.029461469 | 0.02760378  | 0.022464446 |
| ENSG00000114416 | 0.020605665 | 0.028832189 | 0.027308661 | 0.021185793 |
| ENSG00000183963 | 0.040252845 | 0.033366535 | 0.037433074 | 0.032119878 |
| ENSG00000198792 | 0.036073998 | 0.045171211 | 0.051718129 | 0.045104738 |
| ENSG00000127463 | 0.031027186 | 0.033667633 | 0.034758516 | 0.029012473 |
| ENSG00000174776 | 0.016121028 | 0.025541819 | 0.024391767 | 0.01498648  |
| ENSG00000134056 | 0.021418754 | 0.027112021 | 0.027458425 | 0.019159724 |
| ENSG00000184154 | 0.022029152 | 0.028741938 | 0.025485028 | 0.018078327 |
| ENSG00000121361 | 0.016200869 | 0.02533734  | 0.024799632 | 0.015572553 |
| ENSG00000177030 | 0.029248715 | 0.030001065 | 0.033614508 | 0.027488094 |

|                 |             |             |             |             |
|-----------------|-------------|-------------|-------------|-------------|
| ENSG00000132635 | 0.028740305 | 0.033410703 | 0.033391888 | 0.031967527 |
| ENSG00000137821 | 0.045208885 | 0.032688397 | 0.02781206  | 0.027948666 |
| ENSG00000171793 | 0.036114963 | 0.03568692  | 0.034797968 | 0.038548321 |
| ENSG00000108924 | 0.029019091 | 0.026435802 | 0.025802369 | 0.017756275 |
| ENSG00000114439 | 0.02786416  | 0.030375038 | 0.031254547 | 0.02232427  |
| ENSG00000203485 | 0.056218123 | 0.053304884 | 0.041501435 | 0.038912156 |
| ENSG00000100902 | 0.01977529  | 0.0277436   | 0.025899373 | 0.020711977 |
| ENSG00000156466 | 0.016970679 | 0.026350369 | 0.028346083 | 0.017468564 |
| ENSG00000100033 | 0.026451561 | 0.025534488 | 0.025582473 | 0.020464861 |
| ENSG00000090932 | 0.019438606 | 0.028975127 | 0.026796276 | 0.017130596 |
| ENSG00000204220 | 0.027277255 | 0.029714702 | 0.029604031 | 0.023824102 |
| ENSG00000135932 | 0.022248587 | 0.032305233 | 0.033010808 | 0.024153416 |
| ENSG00000160539 | 0.032243196 | 0.031373794 | 0.027403256 | 0.030826931 |
| ENSG00000109670 | 0.036979542 | 0.048464155 | 0.048635802 | 0.047245498 |
| ENSG00000176055 | 0.034218995 | 0.038502254 | 0.034829905 | 0.027734824 |
| ENSG00000163879 | 0.015981256 | 0.02475519  | 0.024436481 | 0.015922039 |
| ENSG00000146399 | 0.015503786 | 0.024253691 | 0.02541597  | 0.015005451 |
| ENSG00000014824 | 0.028229763 | 0.031731519 | 0.030198076 | 0.024368319 |
| ENSG00000164002 | 0.035138799 | 0.034041247 | 0.034283982 | 0.036088733 |
| ENSG00000145623 | 0.016410361 | 0.025166439 | 0.02467508  | 0.016013889 |
| ENSG00000163993 | 0.020336895 | 0.025176475 | 0.02648381  | 0.017450142 |
| ENSG00000124217 | 0.018945136 | 0.026984915 | 0.027066785 | 0.018975909 |
| ENSG00000115840 | 0.029270247 | 0.034528271 | 0.037268472 | 0.034501923 |
| ENSG00000149452 | 0.015051139 | 0.025222831 | 0.024999686 | 0.015463537 |
| ENSG00000124657 | 0.015096467 | 0.024555689 | 0.024272432 | 0.015728457 |
| ENSG00000067248 | 0.031108222 | 0.035875043 | 0.033819163 | 0.031013053 |
| ENSG00000165588 | 0.015871443 | 0.025418985 | 0.024350696 | 0.014573041 |
| ENSG00000221859 | 0.017566346 | 0.030084083 | 0.027894565 | 0.018928492 |
| ENSG00000171631 | 0.015535933 | 0.024917797 | 0.024406923 | 0.015281771 |
| ENSG00000164116 | 0.134284451 | 0.100672127 | 0.101039818 | 0.100496738 |
| ENSG00000187098 | 0.015100434 | 0.024553714 | 0.025933763 | 0.015870228 |
| ENSG00000092377 | 0.015894444 | 0.024996741 | 0.025320768 | 0.014891348 |
| ENSG00000158104 | 0.015447456 | 0.025414468 | 0.024565418 | 0.015309522 |
| ENSG00000140463 | 0.030272066 | 0.037191688 | 0.034878316 | 0.025904271 |
| ENSG00000204688 | 0.016876042 | 0.026825211 | 0.026527718 | 0.017555042 |
| ENSG00000214063 | 0.081961904 | 0.071078951 | 0.059299984 | 0.0736286   |
| ENSG00000166669 | 0.043644234 | 0.046729009 | 0.036583398 | 0.039415405 |
| ENSG00000058091 | 0.04517485  | 0.04750042  | 0.042778682 | 0.042684045 |
| ENSG00000148335 | 0.029363096 | 0.029172116 | 0.03017272  | 0.023704726 |
| ENSG00000173530 | 0.036122601 | 0.035937422 | 0.032687061 | 0.02403242  |
| ENSG00000188215 | 0.020378576 | 0.027942038 | 0.030903422 | 0.01699885  |
| ENSG00000157399 | 0.015222    | 0.024872576 | 0.024761965 | 0.014907451 |
| ENSG00000204264 | 0.026654244 | 0.031636244 | 0.029757911 | 0.026696166 |
| ENSG00000144401 | 0.029855228 | 0.030913471 | 0.029965078 | 0.029363573 |
| ENSG00000164729 | 0.015977759 | 0.02448009  | 0.024520725 | 0.014248892 |
| ENSG00000174106 | 0.030204235 | 0.034228088 | 0.033344658 | 0.026868823 |
| ENSG00000189067 | 0.020260015 | 0.02783079  | 0.032231025 | 0.023056012 |
| ENSG00000179886 | 0.04365618  | 0.044182818 | 0.042278652 | 0.041328894 |
| ENSG00000213780 | 0.03023948  | 0.03647124  | 0.032082279 | 0.028813951 |
| ENSG00000101460 | 0.017474985 | 0.026956685 | 0.02620672  | 0.016086209 |
| ENSG00000129355 | 0.016028403 | 0.024702799 | 0.025213946 | 0.015816429 |
| ENSG00000074590 | 0.014915389 | 0.025149689 | 0.024539732 | 0.015374653 |
| ENSG00000163257 | 0.026397574 | 0.03282942  | 0.032759015 | 0.027633729 |
| ENSG00000134317 | 0.020056022 | 0.025207965 | 0.025470715 | 0.016800487 |

|                 |             |             |             |             |
|-----------------|-------------|-------------|-------------|-------------|
| ENSG00000166510 | 0.018631456 | 0.030713574 | 0.028112873 | 0.01962518  |
| ENSG00000105248 | 0.034014005 | 0.038279638 | 0.045086134 | 0.029855145 |
| ENSG00000129028 | 0.057698254 | 0.056823135 | 0.04071462  | 0.043462863 |
| ENSG00000206562 | 0.030416658 | 0.035597314 | 0.033916696 | 0.026750643 |
| ENSG00000249853 | 0.018088668 | 0.024884044 | 0.026288638 | 0.016732665 |
| ENSG00000187713 | 0.02304005  | 0.030557615 | 0.032085339 | 0.020519977 |
| ENSG00000178201 | 0.018393429 | 0.027139415 | 0.026436648 | 0.017245363 |
| ENSG00000148835 | 0.034546647 | 0.041438501 | 0.033803817 | 0.025552342 |
| ENSG00000156687 | 0.019114029 | 0.025575851 | 0.028198567 | 0.017065767 |
| ENSG00000105825 | 0.125706804 | 0.086600902 | 0.060376573 | 0.066429535 |
| ENSG00000155966 | 0.017630621 | 0.027155867 | 0.026523214 | 0.015260484 |
| ENSG00000131013 | 0.024068942 | 0.028427218 | 0.028945964 | 0.023365368 |
| ENSG00000084112 | 0.027868604 | 0.03347291  | 0.036020942 | 0.028520075 |
| ENSG00000145020 | 0.02854162  | 0.032442777 | 0.031526954 | 0.034037066 |
| ENSG00000133149 | 0.017469613 | 0.029811353 | 0.027487191 | 0.020094393 |
| ENSG00000113361 | 0.015671416 | 0.025057228 | 0.024424872 | 0.014512363 |
| ENSG00000182870 | 0.032518153 | 0.034650029 | 0.029816639 | 0.027030921 |
| ENSG00000107485 | 0.091602974 | 0.064615731 | 0.055762688 | 0.069438196 |
| ENSG00000197162 | 0.020818058 | 0.027619148 | 0.026726921 | 0.022283101 |
| ENSG00000163545 | 0.023564425 | 0.029297072 | 0.027483042 | 0.026784061 |
| ENSG00000160953 | 0.04416269  | 0.043513757 | 0.042270739 | 0.044171712 |
| ENSG00000184500 | 0.018844893 | 0.02847975  | 0.025295607 | 0.017372038 |
| ENSG00000113448 | 0.019517705 | 0.026774633 | 0.028694346 | 0.029950538 |
| ENSG00000169223 | 0.029151559 | 0.028220631 | 0.028952838 | 0.024054576 |
| ENSG00000105808 | 0.041008187 | 0.039285719 | 0.040814374 | 0.034780573 |
| ENSG00000163938 | 0.02486641  | 0.029571116 | 0.030368498 | 0.024007372 |
| ENSG00000161204 | 0.020445256 | 0.027300011 | 0.03175768  | 0.022355821 |
| ENSG00000130037 | 0.016933105 | 0.028962933 | 0.02537475  | 0.016870174 |
| ENSG00000104825 | 0.025596504 | 0.028758945 | 0.034685291 | 0.031806275 |
| ENSG00000116005 | 0.036850417 | 0.034598641 | 0.036543857 | 0.038095785 |
| ENSG00000167098 | 0.016164329 | 0.024882244 | 0.025970569 | 0.016523276 |
| ENSG00000198298 | 0.026185432 | 0.029015805 | 0.031054526 | 0.023113903 |
| ENSG00000131779 | 0.027700767 | 0.031233819 | 0.032671501 | 0.022840959 |
| ENSG00000048545 | 0.015296415 | 0.025836104 | 0.024553587 | 0.015304713 |
| ENSG00000187714 | 0.015321559 | 0.025276803 | 0.025092208 | 0.014353092 |
| ENSG00000161940 | 0.020707322 | 0.034611766 | 0.034392015 | 0.028857902 |
| ENSG00000204619 | 0.024773274 | 0.032226159 | 0.032213749 | 0.02388225  |
| ENSG00000152804 | 0.121615389 | 0.083808655 | 0.078409192 | 0.10560598  |
| ENSG00000163743 | 0.03105033  | 0.036563112 | 0.037539692 | 0.029843916 |
| ENSG00000139880 | 0.016030972 | 0.027000549 | 0.026575368 | 0.016347448 |
| ENSG00000108395 | 0.035943389 | 0.038842529 | 0.033449346 | 0.037623193 |
| ENSG00000175643 | 0.056459103 | 0.060236954 | 0.05171736  | 0.040259212 |
| ENSG00000112624 | 0.024714041 | 0.031167358 | 0.030900453 | 0.021862713 |
| ENSG00000138755 | 0.121802443 | 0.093333464 | 0.031205425 | 0.114317489 |
| ENSG00000172757 | 0.025844798 | 0.029943007 | 0.030160323 | 0.029251104 |
| ENSG00000198830 | 0.025832229 | 0.028400079 | 0.02627557  | 0.02303981  |
| ENSG00000165732 | 0.033914049 | 0.03852396  | 0.037615938 | 0.033271368 |
| ENSG00000115526 | 0.038781004 | 0.038113798 | 0.047281394 | 0.052201524 |
| ENSG00000100263 | 0.028380743 | 0.032675599 | 0.037844042 | 0.030116426 |
| ENSG00000070476 | 0.027109035 | 0.03080511  | 0.033078278 | 0.024756038 |
| ENSG00000108551 | 0.022954982 | 0.0264171   | 0.025290011 | 0.017788286 |
| ENSG00000124212 | 0.015871125 | 0.025003344 | 0.024836844 | 0.0147031   |
| ENSG00000102098 | 0.016219924 | 0.025793437 | 0.027207761 | 0.017841435 |
| ENSG00000156531 | 0.042447829 | 0.054899037 | 0.039993955 | 0.038025811 |

|                 |             |             |             |             |
|-----------------|-------------|-------------|-------------|-------------|
| ENSG00000152942 | 0.014271253 | 0.02546565  | 0.025346475 | 0.016048391 |
| ENSG00000119906 | 0.03967196  | 0.048369916 | 0.040339724 | 0.03153602  |
| ENSG00000186448 | 0.024080977 | 0.031637448 | 0.029578355 | 0.023241799 |
| ENSG00000182473 | 0.03014428  | 0.032389075 | 0.034457806 | 0.028005101 |
| ENSG00000103544 | 0.025598073 | 0.03225558  | 0.02760569  | 0.026963708 |
| ENSG00000175183 | 0.112158225 | 0.091521249 | 0.067732005 | 0.098006295 |
| ENSG00000108984 | 0.040259097 | 0.045193751 | 0.038099297 | 0.033828685 |
| ENSG00000133657 | 0.026135833 | 0.026338873 | 0.029463693 | 0.02112417  |
| ENSG00000198189 | 0.040417855 | 0.036064139 | 0.037362751 | 0.030109644 |
| ENSG00000154917 | 0.031107215 | 0.033462243 | 0.038651372 | 0.02511198  |
| ENSG00000204610 | 0.016142709 | 0.025055148 | 0.024732599 | 0.01470156  |
| ENSG00000151883 | 0.032355963 | 0.038365662 | 0.037052207 | 0.02650072  |
| ENSG00000128309 | 0.038116901 | 0.031266328 | 0.034140414 | 0.041098676 |
| ENSG00000149218 | 0.070070374 | 0.051374811 | 0.048505462 | 0.051051015 |
| ENSG00000197903 | 0.044120463 | 0.054231839 | 0.048367458 | 0.042747181 |
| ENSG00000230522 | 0.017613265 | 0.027033696 | 0.024276604 | 0.014722609 |
| ENSG00000122718 | 0.015253597 | 0.025956209 | 0.026053078 | 0.016876179 |
| ENSG00000197044 | 0.022212627 | 0.025408366 | 0.025772618 | 0.020662096 |
| ENSG00000111799 | 0.016234118 | 0.024368927 | 0.024521014 | 0.015261252 |
| ENSG00000182447 | 0.015584634 | 0.024567523 | 0.025737021 | 0.015970399 |
| ENSG00000169756 | 0.034621299 | 0.034105499 | 0.033148591 | 0.027564372 |
| ENSG00000104756 | 0.039071993 | 0.042398728 | 0.037101306 | 0.035017979 |
| ENSG00000197849 | 0.016989946 | 0.025795426 | 0.025251813 | 0.016494936 |
| ENSG00000168748 | 0.015668807 | 0.02457584  | 0.025069935 | 0.015770248 |
| ENSG00000170315 | 0.014624089 | 0.024647619 | 0.025014036 | 0.015665376 |
| ENSG00000115956 | 0.025287463 | 0.031899716 | 0.033092844 | 0.030843985 |
| ENSG00000079387 | 0.04373737  | 0.045673607 | 0.037393289 | 0.039599184 |
| ENSG00000156508 | 0.013152077 | 0.023545511 | 0.023844292 | 0.014093267 |
| ENSG00000167800 | 0.0155988   | 0.026020168 | 0.025228811 | 0.017416103 |
| ENSG00000104517 | 0.029727592 | 0.036767254 | 0.033074677 | 0.024567256 |
| ENSG00000155666 | 0.017787712 | 0.026623976 | 0.026247129 | 0.016945522 |
| ENSG00000137392 | 0.015715671 | 0.02431059  | 0.024935027 | 0.014586222 |
| ENSG00000136244 | 0.052260007 | 0.031213926 | 0.032323722 | 0.036203065 |
| ENSG00000155850 | 0.038421729 | 0.036529363 | 0.033602399 | 0.029827544 |
| ENSG00000138621 | 0.017387894 | 0.025119054 | 0.026367839 | 0.01505795  |
| ENSG00000077935 | 0.026975794 | 0.026457734 | 0.028295653 | 0.017976079 |
| ENSG00000100979 | 0.025404667 | 0.035386054 | 0.033792106 | 0.025083647 |
| ENSG00000002746 | 0.014451969 | 0.024547142 | 0.024057363 | 0.014233102 |
| ENSG00000137491 | 0.075335782 | 0.074401934 | 0.062454291 | 0.066142722 |
| ENSG00000111752 | 0.046116178 | 0.054103637 | 0.047557585 | 0.051297415 |
| ENSG00000122779 | 0.038006447 | 0.036230601 | 0.038140606 | 0.029139769 |
| ENSG00000183856 | 0.038873188 | 0.038564704 | 0.03827959  | 0.033798118 |
| ENSG00000165794 | 0.015696896 | 0.024959342 | 0.025437147 | 0.01518853  |
| ENSG00000095110 | 0.016068527 | 0.024755516 | 0.025242129 | 0.015041064 |
| ENSG00000107371 | 0.025714109 | 0.031769357 | 0.029209221 | 0.026194657 |
| ENSG00000131626 | 0.038797704 | 0.035404544 | 0.03783513  | 0.034221889 |
| ENSG00000115942 | 0.037772985 | 0.037731256 | 0.03281249  | 0.023218493 |
| ENSG00000134287 | 0.027472617 | 0.033377492 | 0.030652878 | 0.029487027 |
| ENSG00000130921 | 0.033789016 | 0.035725526 | 0.033015785 | 0.031293049 |
| ENSG00000186207 | 0.014307843 | 0.02521258  | 0.024925932 | 0.015202511 |
| ENSG00000104938 | 0.017195156 | 0.025639085 | 0.026270717 | 0.017195845 |
| ENSG00000132024 | 0.025364691 | 0.028181242 | 0.031276657 | 0.024189885 |
| ENSG00000127831 | 0.028258837 | 0.025799835 | 0.0253129   | 0.016477031 |
| ENSG00000162706 | 0.017058635 | 0.025603463 | 0.025035119 | 0.01565428  |

|                 |             |             |             |             |
|-----------------|-------------|-------------|-------------|-------------|
| ENSG00000183735 | 0.022021368 | 0.031537997 | 0.033840728 | 0.019957715 |
| ENSG00000069974 | 0.048656877 | 0.045264767 | 0.046854564 | 0.052475981 |
| ENSG00000198374 | 0.046539223 | 0.041281225 | 0.052144981 | 0.04922617  |
| ENSG00000185633 | 0.035552374 | 0.059293516 | 0.034241418 | 0.032825744 |
| ENSG00000153814 | 0.056311476 | 0.040410554 | 0.036421221 | 0.053060381 |
| ENSG00000160282 | 0.017510013 | 0.028040284 | 0.027903207 | 0.018314431 |
| ENSG00000123352 | 0.030559698 | 0.035076115 | 0.033267534 | 0.026119472 |
| ENSG00000111647 | 0.029889568 | 0.032749728 | 0.034873036 | 0.029785703 |
| ENSG00000182087 | 0.026076464 | 0.035338569 | 0.034699449 | 0.031590564 |
| ENSG00000186642 | 0.01838516  | 0.024485818 | 0.02516412  | 0.017899858 |
| ENSG00000132664 | 0.026955128 | 0.034835849 | 0.036621081 | 0.034083425 |
| ENSG00000179314 | 0.018585805 | 0.026053428 | 0.026903952 | 0.017385618 |
| ENSG00000160813 | 0.032604131 | 0.033786994 | 0.033905486 | 0.026884374 |
| ENSG00000110315 | 0.031173376 | 0.030629559 | 0.029100929 | 0.02031521  |
| ENSG00000187240 | 0.015907138 | 0.026082575 | 0.02558945  | 0.016196738 |
| ENSG00000163686 | 0.074315559 | 0.062547481 | 0.061181827 | 0.062419016 |
| ENSG00000147113 | 0.016157707 | 0.024826194 | 0.025154957 | 0.015442316 |
| ENSG00000198734 | 0.061887229 | 0.02612024  | 0.026255737 | 0.022565202 |
| ENSG00000219438 | 0.038888361 | 0.037706296 | 0.027848784 | 0.021341218 |
| ENSG00000100522 | 0.02404236  | 0.027788801 | 0.028863823 | 0.02089631  |
| ENSG00000006756 | 0.020772474 | 0.02706534  | 0.025943162 | 0.01936599  |
| ENSG00000164574 | 0.015721373 | 0.024527799 | 0.024026817 | 0.015501992 |
| ENSG00000182179 | 0.028182798 | 0.034381465 | 0.03304126  | 0.029841352 |
| ENSG00000173334 | 0.064687236 | 0.051485245 | 0.059301725 | 0.059480217 |
| ENSG00000169807 | 0.015803755 | 0.02420156  | 0.024320627 | 0.015199472 |
| ENSG00000179751 | 0.021157639 | 0.027909874 | 0.028872422 | 0.021204014 |
| ENSG00000179933 | 0.015637257 | 0.024687758 | 0.024463144 | 0.015267477 |
| ENSG00000183024 | 0.015765452 | 0.025488615 | 0.024438746 | 0.01500933  |
| ENSG00000126653 | 0.028401398 | 0.035555698 | 0.036122624 | 0.02357217  |
| ENSG00000128283 | 0.016659649 | 0.025620548 | 0.026080713 | 0.015552835 |
| ENSG00000109667 | 0.016419967 | 0.025616191 | 0.024750137 | 0.016353886 |
| ENSG00000016864 | 0.038189858 | 0.044230585 | 0.041135769 | 0.046390847 |
| ENSG00000232434 | 0.014558171 | 0.023784664 | 0.024343284 | 0.015181033 |
| ENSG00000188000 | 0.027370458 | 0.034433687 | 0.034635466 | 0.035206755 |
| ENSG00000128604 | 0.064445189 | 0.060795056 | 0.064323904 | 0.049555845 |
| ENSG00000161594 | 0.019445918 | 0.026558982 | 0.025912855 | 0.019222986 |
| ENSG00000170509 | 0.020935784 | 0.031987155 | 0.027021365 | 0.022903077 |
| ENSG00000088833 | 0.033801444 | 0.03954862  | 0.037690878 | 0.030231827 |
| ENSG00000163684 | 0.030046745 | 0.037500794 | 0.040500411 | 0.028029675 |
| ENSG00000123124 | 0.028559547 | 0.031565944 | 0.031250579 | 0.024267408 |
| ENSG00000148204 | 0.01748322  | 0.026038622 | 0.027995374 | 0.019933178 |
| ENSG00000099821 | 0.026522477 | 0.031690329 | 0.031567772 | 0.02593455  |
| ENSG00000160223 | 0.025812893 | 0.03336381  | 0.032868771 | 0.027157316 |
| ENSG00000167165 | 0.01613579  | 0.02476449  | 0.024349429 | 0.015282284 |
| ENSG00000160691 | 0.016976184 | 0.025652974 | 0.025336082 | 0.01634752  |
| ENSG00000183798 | 0.016080336 | 0.023718495 | 0.024569235 | 0.014990497 |
| ENSG00000146469 | 0.016691676 | 0.026806556 | 0.02493766  | 0.015421663 |
| ENSG00000064651 | 0.043665056 | 0.051408014 | 0.054005995 | 0.054110311 |
| ENSG00000197563 | 0.017346115 | 0.025690172 | 0.025618215 | 0.016132012 |
| ENSG00000163041 | 0.039315051 | 0.034785432 | 0.033441726 | 0.03936927  |
| ENSG00000186891 | 0.115968942 | 0.075234174 | 0.075623701 | 0.08242764  |
| ENSG00000127445 | 0.023672851 | 0.028961737 | 0.027459626 | 0.021370581 |
| ENSG00000114248 | 0.065227216 | 0.075565052 | 0.044837953 | 0.040716973 |
| ENSG00000164068 | 0.020604098 | 0.031000681 | 0.027284251 | 0.022654336 |



|                 |             |             |             |             |
|-----------------|-------------|-------------|-------------|-------------|
| ENSG00000137760 | 0.031775045 | 0.031880754 | 0.032016736 | 0.028757164 |
| ENSG00000156170 | 0.037337511 | 0.03775281  | 0.036740849 | 0.044241583 |
| ENSG00000119844 | 0.024694456 | 0.034354223 | 0.032048105 | 0.027932666 |
| ENSG00000170855 | 0.026987577 | 0.030064746 | 0.029457846 | 0.023203632 |
| ENSG00000180354 | 0.05446796  | 0.065455145 | 0.044908528 | 0.057420355 |
| ENSG00000197006 | 0.03678573  | 0.037006101 | 0.036382757 | 0.029658536 |
| ENSG00000162039 | 0.015904733 | 0.024645712 | 0.024738829 | 0.014773639 |
| ENSG00000163106 | 0.023220009 | 0.025787821 | 0.026597622 | 0.017693965 |
| ENSG00000011478 | 0.020620029 | 0.028235503 | 0.026351333 | 0.0190629   |
| ENSG00000143669 | 0.043955934 | 0.046847338 | 0.042816748 | 0.042230046 |
| ENSG00000076944 | 0.027586914 | 0.029742386 | 0.033211683 | 0.023365839 |
| ENSG00000146453 | 0.016272188 | 0.024658933 | 0.026539346 | 0.058412549 |
| ENSG00000163512 | 0.03069467  | 0.034869182 | 0.035334684 | 0.028588038 |
| ENSG00000142627 | 0.02133993  | 0.028319612 | 0.027091039 | 0.021095129 |
| ENSG00000112964 | 0.136098226 | 0.037346284 | 0.025843084 | 0.0741961   |
| ENSG00000116198 | 0.023875231 | 0.031684949 | 0.031488782 | 0.025436081 |
| ENSG00000099804 | 0.024044846 | 0.031643681 | 0.031893097 | 0.025499745 |
| ENSG00000137808 | 0.01821761  | 0.025660995 | 0.025458154 | 0.017055688 |
| ENSG00000001617 | 0.014877451 | 0.024623375 | 0.024769341 | 0.014448891 |
| ENSG00000125691 | 0.01848926  | 0.026111924 | 0.025020656 | 0.023562537 |
| ENSG00000082996 | 0.018164851 | 0.024659454 | 0.02607166  | 0.017726565 |
| ENSG00000060642 | 0.037620601 | 0.039862028 | 0.032920386 | 0.029096425 |
| ENSG00000186393 | 0.015261053 | 0.026022185 | 0.024151669 | 0.015651632 |
| ENSG00000168826 | 0.017369456 | 0.025481758 | 0.025422648 | 0.014873702 |
| ENSG00000065665 | 0.028684369 | 0.031941667 | 0.031263036 | 0.027509187 |
| ENSG00000178150 | 0.061543007 | 0.057581169 | 0.050522807 | 0.051463041 |
| ENSG00000115593 | 0.019362449 | 0.02674563  | 0.025121293 | 0.018246847 |
| ENSG00000124772 | 0.049707876 | 0.0424604   | 0.053267185 | 0.052119652 |
| ENSG00000145545 | 0.030165311 | 0.036084864 | 0.033325742 | 0.026314361 |
| ENSG00000114098 | 0.035562772 | 0.035606956 | 0.038321918 | 0.037164965 |
| ENSG00000115368 | 0.043278006 | 0.035492412 | 0.034691364 | 0.043794527 |
| ENSG00000174885 | 0.015354147 | 0.025574607 | 0.025520053 | 0.015674602 |
| ENSG00000162843 | 0.016775302 | 0.026267631 | 0.024687315 | 0.015977763 |
| ENSG00000165175 | 0.057285732 | 0.053605445 | 0.04802007  | 0.059915156 |
| ENSG00000108654 | 0.024403626 | 0.032186319 | 0.033972325 | 0.026379714 |
| ENSG00000068024 | 0.055706811 | 0.055760289 | 0.044603312 | 0.041262707 |
| ENSG00000110169 | 0.020511606 | 0.027683658 | 0.026560754 | 0.016575549 |
| ENSG00000163519 | 0.060023681 | 0.026505669 | 0.02457805  | 0.031856684 |
| ENSG00000164414 | 0.042210896 | 0.044855528 | 0.034962439 | 0.029944257 |
| ENSG00000183273 | 0.015584824 | 0.024154988 | 0.025682978 | 0.015283795 |
| ENSG00000087470 | 0.035992877 | 0.046525782 | 0.031771529 | 0.029615757 |
| ENSG00000232040 | 0.018128531 | 0.02557928  | 0.025525736 | 0.018072724 |
| ENSG00000115289 | 0.021378614 | 0.026991232 | 0.033547157 | 0.023400238 |
| ENSG00000100030 | 0.037866481 | 0.036674153 | 0.039129547 | 0.037244065 |
| ENSG00000141376 | 0.087423375 | 0.058058188 | 0.056988382 | 0.045869925 |
| ENSG00000204482 | 0.022676938 | 0.025976675 | 0.026329829 | 0.015939327 |
| ENSG00000241322 | 0.01651918  | 0.025990148 | 0.024938889 | 0.016023668 |
| ENSG00000163975 | 0.018664479 | 0.026872556 | 0.026026907 | 0.017147793 |
| ENSG00000204410 | 0.03367217  | 0.03292244  | 0.031475978 | 0.024517723 |
| ENSG00000164934 | 0.032259552 | 0.034841732 | 0.032696972 | 0.030483885 |
| ENSG00000112110 | 0.026912385 | 0.030627408 | 0.027778124 | 0.020989262 |
| ENSG00000180881 | 0.01802139  | 0.025947211 | 0.025344076 | 0.01550536  |
| ENSG00000102313 | 0.015580058 | 0.025340517 | 0.025386836 | 0.015286216 |
| ENSG00000164111 | 0.03908082  | 0.032678886 | 0.033779939 | 0.036452628 |

|                 |             |             |             |             |
|-----------------|-------------|-------------|-------------|-------------|
| ENSG00000140450 | 0.023501223 | 0.064827639 | 0.048230476 | 0.043269025 |
| ENSG00000067840 | 0.015180735 | 0.025427557 | 0.024873099 | 0.015220849 |
| ENSG00000160113 | 0.048870014 | 0.043224462 | 0.041574581 | 0.041647189 |
| ENSG00000164327 | 0.024324285 | 0.028791356 | 0.033784    | 0.021211663 |
| ENSG00000204956 | 0.01681238  | 0.025170065 | 0.026475824 | 0.015329759 |
| ENSG00000135248 | 0.0168181   | 0.026454896 | 0.026319128 | 0.015942741 |
| ENSG00000121380 | 0.020224082 | 0.026902902 | 0.026430396 | 0.017732114 |
| ENSG00000244731 | 0.024570731 | 0.027617073 | 0.02705748  | 0.029540365 |
| ENSG00000182827 | 0.0306492   | 0.033701956 | 0.033589353 | 0.028845933 |
| ENSG00000132912 | 0.031581652 | 0.037120353 | 0.034933231 | 0.029452923 |
| ENSG00000164221 | 0.038647651 | 0.144014226 | 0.140043487 | 0.033520016 |
| ENSG00000112249 | 0.033848036 | 0.040066466 | 0.029056641 | 0.030291137 |
| ENSG00000125245 | 0.075212238 | 0.055133936 | 0.065776733 | 0.080426684 |
| ENSG00000236249 | 0.049035513 | 0.024855888 | 0.026094453 | 0.015260968 |
| ENSG00000143819 | 0.017618233 | 0.024921131 | 0.026574288 | 0.015877643 |
| ENSG00000175416 | 0.016295168 | 0.024095281 | 0.025091025 | 0.015418211 |
| ENSG00000149357 | 0.021278674 | 0.026548541 | 0.02959082  | 0.025727852 |
| ENSG00000185306 | 0.015132717 | 0.024703024 | 0.024814842 | 0.015109266 |
| ENSG00000110921 | 0.030101768 | 0.032856759 | 0.031500746 | 0.027014478 |
| ENSG00000130032 | 0.016609278 | 0.024797049 | 0.02497241  | 0.016307784 |
| ENSG00000177971 | 0.021213964 | 0.027504062 | 0.028338902 | 0.017001076 |
| ENSG00000178078 | 0.060244322 | 0.050220805 | 0.05119139  | 0.043366988 |
| ENSG00000103310 | 0.015669753 | 0.025143614 | 0.025185645 | 0.014969077 |
| ENSG00000116539 | 0.022639951 | 0.028444505 | 0.025792896 | 0.01867247  |
| ENSG00000144199 | 0.028988465 | 0.030623967 | 0.029319862 | 0.025161291 |
| ENSG00000158417 | 0.024067617 | 0.03027347  | 0.028575886 | 0.019618034 |
| ENSG00000240263 | 0.015398936 | 0.024901138 | 0.024039222 | 0.015111409 |
| ENSG00000124019 | 0.016126564 | 0.02501213  | 0.026046572 | 0.01623091  |
| ENSG00000124780 | 0.015398089 | 0.025027149 | 0.024296366 | 0.015633426 |
| ENSG00000188612 | 0.029953943 | 0.034490476 | 0.027998268 | 0.023937496 |
| ENSG00000114054 | 0.02591     | 0.028309786 | 0.030868519 | 0.025997488 |
| ENSG00000118231 | 0.015638497 | 0.025216448 | 0.024634513 | 0.014941233 |
| ENSG00000071655 | 0.033342955 | 0.035692592 | 0.036725726 | 0.028933137 |
| ENSG00000011347 | 0.017543528 | 0.026727857 | 0.026008154 | 0.017046865 |
| ENSG00000138185 | 0.037224487 | 0.039522652 | 0.043939931 | 0.034670695 |
| ENSG00000173621 | 0.043688668 | 0.040129011 | 0.04055129  | 0.037177337 |
| ENSG00000139624 | 0.038440359 | 0.035102569 | 0.034346738 | 0.037295384 |
| ENSG00000096717 | 0.034628336 | 0.039912277 | 0.044299027 | 0.035823833 |
| ENSG00000157326 | 0.033762506 | 0.041186071 | 0.039871327 | 0.044610243 |
| ENSG00000087116 | 0.015439959 | 0.024478134 | 0.024410317 | 0.01508983  |
| ENSG00000161813 | 0.04047903  | 0.041775485 | 0.038100418 | 0.039389379 |
| ENSG00000004939 | 0.017849387 | 0.026918896 | 0.026328202 | 0.016462997 |
| ENSG00000112782 | 0.018482831 | 0.025578135 | 0.025676699 | 0.019867    |
| ENSG00000152404 | 0.02798186  | 0.036198638 | 0.03079983  | 0.027575141 |
| ENSG00000155087 | 0.024575458 | 0.034170307 | 0.027042467 | 0.022405855 |
| ENSG00000105737 | 0.016517773 | 0.026251342 | 0.025011388 | 0.01623873  |
| ENSG00000162623 | 0.048056666 | 0.037897507 | 0.035450263 | 0.047444336 |
| ENSG00000146278 | 0.020796059 | 0.030622268 | 0.029090543 | 0.028575063 |
| ENSG00000105171 | 0.022971337 | 0.027996118 | 0.029144674 | 0.021123519 |
| ENSG00000142178 | 0.064511565 | 0.05799182  | 0.051659658 | 0.055141748 |
| ENSG00000160967 | 0.034626784 | 0.035422879 | 0.034555113 | 0.029733452 |
| ENSG00000181004 | 0.015306401 | 0.025044573 | 0.024606263 | 0.015295993 |
| ENSG00000180914 | 0.066325851 | 0.046986192 | 0.052001062 | 0.06401852  |
| ENSG00000142082 | 0.033491689 | 0.045804333 | 0.039953722 | 0.033072421 |

|                 |             |             |             |             |
|-----------------|-------------|-------------|-------------|-------------|
| ENSG00000175354 | 0.031924612 | 0.040703793 | 0.036091503 | 0.027560039 |
| ENSG00000123407 | 0.015858791 | 0.026117282 | 0.025639591 | 0.016121632 |
| ENSG00000164190 | 0.028332708 | 0.03430503  | 0.032318267 | 0.029029431 |
| ENSG00000132622 | 0.016558103 | 0.023699034 | 0.024771569 | 0.015198933 |
| ENSG00000168131 | 0.028313821 | 0.028870333 | 0.026451955 | 0.023472838 |
| ENSG00000139053 | 0.015596662 | 0.025713385 | 0.025055134 | 0.016448367 |
| ENSG00000184675 | 0.026231455 | 0.033028083 | 0.032491113 | 0.027204004 |
| ENSG00000120068 | 0.021619642 | 0.030071207 | 0.028429415 | 0.02231372  |
| ENSG00000176273 | 0.040006443 | 0.038394348 | 0.048307727 | 0.040995678 |
| ENSG00000173805 | 0.01591345  | 0.025751845 | 0.024361977 | 0.015753286 |
| ENSG00000157782 | 0.090445269 | 0.076250832 | 0.062236659 | 0.073377078 |
| ENSG00000170909 | 0.017621209 | 0.027241321 | 0.027226866 | 0.018725961 |
| ENSG00000115998 | 0.03443373  | 0.037120838 | 0.032832849 | 0.030820369 |
| ENSG00000135341 | 0.022447745 | 0.031940823 | 0.031898631 | 0.021232947 |
| ENSG00000138674 | 0.020662554 | 0.028179934 | 0.030980161 | 0.021534772 |
| ENSG00000132740 | 0.031294942 | 0.036362395 | 0.033968683 | 0.026554687 |
| ENSG00000170310 | 0.030214961 | 0.029508032 | 0.030673456 | 0.024695085 |
| ENSG00000102531 | 0.034604941 | 0.034442052 | 0.031619777 | 0.033226241 |
| ENSG00000134207 | 0.016739269 | 0.026573056 | 0.025965533 | 0.016028892 |
| ENSG00000013016 | 0.03228537  | 0.034793157 | 0.028018827 | 0.022375971 |
| ENSG00000163092 | 0.01722862  | 0.025029991 | 0.024862246 | 0.017877496 |
| ENSG00000240972 | 0.019970954 | 0.02486369  | 0.025715898 | 0.017610947 |
| ENSG00000198133 | 0.016852814 | 0.024845488 | 0.0255371   | 0.015901488 |
| ENSG00000164713 | 0.036019599 | 0.037332973 | 0.032809698 | 0.029213544 |
| ENSG00000196754 | 0.028951047 | 0.038076249 | 0.034657862 | 0.030282264 |
| ENSG00000134258 | 0.017113795 | 0.025435513 | 0.026356761 | 0.017057875 |
| ENSG00000077097 | 0.027369234 | 0.03469105  | 0.034446538 | 0.027863819 |
| ENSG00000130449 | 0.0224411   | 0.027466308 | 0.027319367 | 0.021647282 |
| ENSG00000180182 | 0.017291802 | 0.027789788 | 0.027272376 | 0.016739296 |
| ENSG00000139537 | 0.016570378 | 0.024300701 | 0.024947912 | 0.014710767 |
| ENSG00000179388 | 0.056227172 | 0.042846278 | 0.048923608 | 0.047614922 |
| ENSG00000137575 | 0.03883748  | 0.038356404 | 0.038101781 | 0.030631677 |
| ENSG00000121211 | 0.051270314 | 0.038290188 | 0.03609787  | 0.035122038 |
| ENSG00000130234 | 0.01841537  | 0.025451627 | 0.027482991 | 0.015890376 |
| ENSG00000102104 | 0.018788974 | 0.028573286 | 0.026728974 | 0.02111508  |
| ENSG00000109171 | 0.028509523 | 0.040406134 | 0.036800325 | 0.031074205 |
| ENSG00000137801 | 0.042053903 | 0.030936421 | 0.036144003 | 0.024157263 |
| ENSG00000148175 | 0.039463495 | 0.049424333 | 0.049762659 | 0.038021189 |
| ENSG00000140986 | 0.016502617 | 0.024934496 | 0.024846092 | 0.0158534   |
| ENSG00000123213 | 0.042394151 | 0.040732643 | 0.033660811 | 0.036735344 |
| ENSG00000145526 | 0.015552176 | 0.025043222 | 0.024565986 | 0.014001544 |
| ENSG00000197140 | 0.017347722 | 0.027557393 | 0.026769428 | 0.017527827 |
| ENSG00000134200 | 0.016131826 | 0.027499526 | 0.025736205 | 0.01593123  |
| ENSG00000133731 | 0.030022042 | 0.035870709 | 0.033185152 | 0.025177869 |
| ENSG00000036054 | 0.031474079 | 0.037621655 | 0.043909703 | 0.038709414 |
| ENSG00000182240 | 0.082283202 | 0.072559708 | 0.096344168 | 0.100689934 |
| ENSG00000149177 | 0.020129531 | 0.027130576 | 0.026340894 | 0.016665725 |
| ENSG00000106404 | 0.037868074 | 0.039021921 | 0.042691736 | 0.038691873 |
| ENSG00000173264 | 0.017031888 | 0.026612181 | 0.025661229 | 0.017582996 |
| ENSG00000166938 | 0.049587184 | 0.046292813 | 0.040373263 | 0.037236777 |
| ENSG00000083444 | 0.040503964 | 0.041893275 | 0.040226985 | 0.030500993 |
| ENSG00000159216 | 0.061566201 | 0.03814275  | 0.040802578 | 0.054298463 |
| ENSG00000163564 | 0.027740499 | 0.033629484 | 0.035309978 | 0.038500486 |
| ENSG00000140993 | 0.037775404 | 0.039391117 | 0.035262367 | 0.035607538 |

|                 |             |             |             |             |
|-----------------|-------------|-------------|-------------|-------------|
| ENSG00000174225 | 0.01291491  | 0.023383165 | 0.023328863 | 0.012931429 |
| ENSG00000171298 | 0.034210799 | 0.036938341 | 0.034483006 | 0.033647293 |
| ENSG00000129084 | 0.033434558 | 0.035771067 | 0.035630031 | 0.030953624 |
| ENSG00000117245 | 0.015482448 | 0.025110822 | 0.024998304 | 0.015852659 |
| ENSG00000185565 | 0.080874562 | 0.060463841 | 0.061132076 | 0.074661746 |
| ENSG00000124749 | 0.016259772 | 0.024903027 | 0.026137202 | 0.015626073 |
| ENSG00000122694 | 0.048785714 | 0.060058819 | 0.056649023 | 0.057906484 |
| ENSG0000067334  | 0.031331413 | 0.034908496 | 0.038698098 | 0.029789322 |
| ENSG00000075035 | 0.018549906 | 0.026229385 | 0.028897953 | 0.016886562 |
| ENSG00000124578 | 0.016242455 | 0.025690684 | 0.02630969  | 0.016519196 |
| ENSG00000151650 | 0.015811567 | 0.025067315 | 0.025550169 | 0.01568386  |
| ENSG00000100316 | 0.017480591 | 0.024858636 | 0.025839191 | 0.018025267 |
| ENSG00000174695 | 0.02941385  | 0.033666424 | 0.03251141  | 0.023112822 |
| ENSG00000163608 | 0.022218601 | 0.031347572 | 0.032187224 | 0.022318562 |
| ENSG00000198700 | 0.030672493 | 0.035463551 | 0.029641723 | 0.023860859 |
| ENSG00000164970 | 0.028098725 | 0.032414995 | 0.029634551 | 0.0282315   |
| ENSG00000205176 | 0.016510097 | 0.025024354 | 0.024616596 | 0.014953366 |
| ENSG00000198807 | 0.016329762 | 0.025503498 | 0.024599949 | 0.015005377 |
| ENSG00000169359 | 0.035381802 | 0.037701218 | 0.042042083 | 0.036749897 |
| ENSG00000189377 | 0.017104595 | 0.025517917 | 0.025184744 | 0.017629188 |
| ENSG00000120137 | 0.024987795 | 0.030063232 | 0.028658092 | 0.020118058 |
| ENSG00000109065 | 0.023821548 | 0.030446828 | 0.032694649 | 0.025459936 |
| ENSG00000049130 | 0.01741814  | 0.025932357 | 0.026439116 | 0.016174314 |
| ENSG00000130876 | 0.016552044 | 0.024742709 | 0.025144613 | 0.015386283 |
| ENSG00000168071 | 0.037160103 | 0.040253758 | 0.040462148 | 0.028821212 |
| ENSG00000183527 | 0.029379978 | 0.029943022 | 0.029138917 | 0.029576795 |
| ENSG00000146072 | 0.118517012 | 0.083957837 | 0.068882302 | 0.084945032 |
| ENSG00000170606 | 0.022941677 | 0.029194391 | 0.028429107 | 0.023035997 |
| ENSG00000169621 | 0.016288204 | 0.026402361 | 0.025160539 | 0.016446086 |
| ENSG00000182326 | 0.019109043 | 0.025491992 | 0.025031826 | 0.019972903 |
| ENSG00000160613 | 0.028250145 | 0.030532943 | 0.028702532 | 0.025504007 |
| ENSG00000168631 | 0.016180459 | 0.02508626  | 0.02451508  | 0.015298728 |
| ENSG00000166086 | 0.069266969 | 0.061430008 | 0.047654788 | 0.065467876 |
| ENSG00000176595 | 0.018101396 | 0.025680382 | 0.028035744 | 0.017244335 |
| ENSG00000114127 | 0.033700861 | 0.044249627 | 0.041070359 | 0.032583653 |
| ENSG00000198795 | 0.030480959 | 0.02615982  | 0.025258159 | 0.017615361 |
| ENSG00000146205 | 0.038153743 | 0.035964899 | 0.035078252 | 0.034161696 |
| ENSG00000169155 | 0.030093904 | 0.046888144 | 0.044624324 | 0.028374163 |
| ENSG00000130675 | 0.118589109 | 0.080317578 | 0.075283293 | 0.097969133 |
| ENSG00000100722 | 0.024984903 | 0.031074036 | 0.032643317 | 0.02392289  |
| ENSG00000189212 | 0.032395566 | 0.028969059 | 0.026482491 | 0.023491487 |
| ENSG00000173991 | 0.01551324  | 0.025679413 | 0.025032757 | 0.015874376 |
| ENSG00000204257 | 0.028956982 | 0.034405161 | 0.035011436 | 0.038466685 |
| ENSG00000145794 | 0.015160849 | 0.023671437 | 0.024387212 | 0.014044908 |
| ENSG00000149136 | 0.027125316 | 0.027680326 | 0.02953811  | 0.02417209  |
| ENSG00000148288 | 0.058795382 | 0.053280053 | 0.052591837 | 0.063673655 |
| ENSG00000147873 | 0.01679428  | 0.025424573 | 0.02510894  | 0.01579541  |
| ENSG00000197576 | 0.017365671 | 0.025299548 | 0.025471685 | 0.014929302 |
| ENSG00000053438 | 0.045492894 | 0.029977653 | 0.031353546 | 0.027048756 |
| ENSG00000143155 | 0.044211608 | 0.045063471 | 0.050432974 | 0.055322355 |
| ENSG00000144647 | 0.020503715 | 0.026497483 | 0.025691006 | 0.02000956  |
| ENSG00000171053 | 0.016740999 | 0.025518885 | 0.024342778 | 0.015874793 |
| ENSG00000125538 | 0.104471005 | 0.111365919 | 0.094954808 | 0.093325509 |
| ENSG00000144785 | 0.035670099 | 0.042752976 | 0.036206638 | 0.029440313 |

|                 |             |             |             |             |
|-----------------|-------------|-------------|-------------|-------------|
| ENSG00000165983 | 0.064381884 | 0.071816054 | 0.060761396 | 0.054250608 |
| ENSG00000139496 | 0.019398417 | 0.026791799 | 0.025969912 | 0.019971416 |
| ENSG00000074317 | 0.018106769 | 0.024964643 | 0.025641584 | 0.016446836 |
| ENSG00000119446 | 0.030184377 | 0.036230325 | 0.030300609 | 0.022604409 |
| ENSG00000174007 | 0.030562348 | 0.029839883 | 0.033290107 | 0.02579777  |
| ENSG00000115290 | 0.018457321 | 0.02825238  | 0.027377432 | 0.0182528   |
| ENSG00000172938 | 0.015352513 | 0.024609248 | 0.025132398 | 0.014138033 |
| ENSG00000147677 | 0.019383163 | 0.02661768  | 0.026473887 | 0.019353373 |
| ENSG00000172940 | 0.017348066 | 0.024900607 | 0.025300701 | 0.016112961 |
| ENSG00000157593 | 0.024772624 | 0.036404768 | 0.038184256 | 0.031758641 |
| ENSG00000115514 | 0.035728834 | 0.040184134 | 0.036836726 | 0.05575011  |
| ENSG00000215790 | 0.032105558 | 0.035984999 | 0.034661658 | 0.031930541 |
| ENSG00000035664 | 0.03298857  | 0.033141654 | 0.033701657 | 0.046921423 |
| ENSG00000085999 | 0.05005148  | 0.04413127  | 0.034559538 | 0.028928618 |
| ENSG00000131018 | 0.017577178 | 0.028687521 | 0.026169683 | 0.01710895  |
| ENSG00000102359 | 0.017967623 | 0.026125721 | 0.02627761  | 0.017748019 |
| ENSG00000125571 | 0.016092914 | 0.024140945 | 0.024980252 | 0.01650406  |
| ENSG00000131351 | 0.042004501 | 0.033743006 | 0.034841249 | 0.029691088 |
| ENSG00000181218 | 0.069434923 | 0.058744395 | 0.050049424 | 0.053288921 |
| ENSG00000181656 | 0.014222854 | 0.025036394 | 0.025828308 | 0.01531254  |
| ENSG00000164743 | 0.023015452 | 0.02633817  | 0.028689253 | 0.019045006 |
| ENSG00000100330 | 0.024569402 | 0.031139364 | 0.036939828 | 0.022669296 |
| ENSG00000172476 | 0.017755285 | 0.026048692 | 0.025423343 | 0.025184619 |
| ENSG00000172070 | 0.063106017 | 0.042291448 | 0.054281149 | 0.039887385 |
| ENSG00000165359 | 0.02898342  | 0.035000562 | 0.032276286 | 0.025306633 |
| ENSG00000141401 | 0.077972183 | 0.060187007 | 0.050818101 | 0.054428794 |
| ENSG00000134748 | 0.034967438 | 0.036201931 | 0.037047798 | 0.032792645 |
| ENSG00000134014 | 0.02499076  | 0.033494675 | 0.031023558 | 0.02225908  |
| ENSG00000125430 | 0.019596032 | 0.026384775 | 0.026277586 | 0.019996898 |
| ENSG00000204248 | 0.020919144 | 0.025627148 | 0.025720766 | 0.018521721 |
| ENSG00000125823 | 0.015829156 | 0.024966292 | 0.025101626 | 0.015243666 |
| ENSG00000205810 | 0.01809156  | 0.027586204 | 0.025669665 | 0.01634929  |
| ENSG00000186635 | 0.016525704 | 0.025200029 | 0.027371965 | 0.016433816 |
| ENSG00000186994 | 0.024687908 | 0.029069902 | 0.026861424 | 0.023653499 |
| ENSG00000141026 | 0.031046357 | 0.037203886 | 0.036231469 | 0.030912061 |
| ENSG00000104221 | 0.027725188 | 0.033199939 | 0.039960011 | 0.02662117  |
| ENSG00000130943 | 0.015238411 | 0.02581235  | 0.025194108 | 0.016360099 |
| ENSG00000148584 | 0.015779711 | 0.024655399 | 0.025567209 | 0.015849029 |
| ENSG00000170954 | 0.060929553 | 0.051305392 | 0.0560297   | 0.06335567  |
| ENSG00000115380 | 0.015468439 | 0.025745188 | 0.02524202  | 0.016027538 |
| ENSG00000122257 | 0.039620789 | 0.036969546 | 0.029197807 | 0.032247796 |
| ENSG00000119801 | 0.02942241  | 0.036375674 | 0.037778792 | 0.026584647 |
| ENSG00000132128 | 0.031235024 | 0.038073057 | 0.033461633 | 0.02668294  |
| ENSG00000003987 | 0.020864078 | 0.026817254 | 0.029793701 | 0.016247052 |
| ENSG00000158077 | 0.018770894 | 0.025239509 | 0.025012227 | 0.018262094 |
| ENSG00000163541 | 0.024788028 | 0.029791965 | 0.031420699 | 0.020323701 |
| ENSG00000204007 | 0.016761266 | 0.024984802 | 0.024729169 | 0.017243928 |
| ENSG00000163961 | 0.023293599 | 0.02815074  | 0.027943524 | 0.019886651 |
| ENSG00000134333 | 0.024158393 | 0.026603622 | 0.024989515 | 0.018393194 |
| ENSG00000204394 | 0.04374855  | 0.04113133  | 0.03933508  | 0.039067739 |
| ENSG00000126460 | 0.047384017 | 0.048244988 | 0.04115174  | 0.061162143 |
| ENSG00000137076 | 0.032029536 | 0.047201564 | 0.040303804 | 0.038633342 |
| ENSG00000166788 | 0.031426267 | 0.030672067 | 0.028747457 | 0.02691766  |
| ENSG00000040531 | 0.031315011 | 0.03325788  | 0.034503202 | 0.027256488 |

|                 |             |             |             |             |
|-----------------|-------------|-------------|-------------|-------------|
| ENSG00000149131 | 0.018164566 | 0.025253659 | 0.024832245 | 0.01660493  |
| ENSG00000133773 | 0.025994734 | 0.030749649 | 0.033639204 | 0.024242208 |
| ENSG00000186094 | 0.016168715 | 0.02456321  | 0.024775953 | 0.015127065 |
| ENSG00000155561 | 0.027014352 | 0.034058352 | 0.028193811 | 0.022141692 |
| ENSG00000139505 | 0.032868508 | 0.039138849 | 0.04183634  | 0.039539782 |
| ENSG00000179051 | 0.024705106 | 0.030490144 | 0.03190584  | 0.027250294 |
| ENSG00000106211 | 0.054511869 | 0.041986111 | 0.048569151 | 0.050581929 |
| ENSG00000149948 | 0.058520935 | 0.027991488 | 0.033449693 | 0.016787037 |
| ENSG00000179630 | 0.017201946 | 0.027000953 | 0.02585751  | 0.017299269 |
| ENSG00000149532 | 0.015766287 | 0.026173898 | 0.025611862 | 0.017524022 |
| ENSG00000134109 | 0.033921071 | 0.034858641 | 0.035477767 | 0.026741785 |
| ENSG00000100150 | 0.021910609 | 0.02904496  | 0.028057056 | 0.019609338 |
| ENSG00000205929 | 0.015615363 | 0.0246893   | 0.027328165 | 0.016344453 |
| ENSG00000173218 | 0.021857098 | 0.024405589 | 0.025416866 | 0.020631974 |
| ENSG00000156931 | 0.027768154 | 0.030210246 | 0.030329581 | 0.027411123 |
| ENSG00000185432 | 0.090155767 | 0.074203184 | 0.087868253 | 0.107761742 |
| ENSG00000125084 | 0.016070783 | 0.025267751 | 0.024637959 | 0.014666119 |
| ENSG00000196116 | 0.031900955 | 0.038011866 | 0.033964101 | 0.029030732 |
| ENSG00000136450 | 0.024153574 | 0.028820347 | 0.027480431 | 0.023611195 |
| ENSG00000142599 | 0.04468405  | 0.042934102 | 0.03959438  | 0.0385542   |
| ENSG00000164309 | 0.027625343 | 0.026625204 | 0.027442728 | 0.021309088 |
| ENSG00000196683 | 0.019058836 | 0.027364978 | 0.026373849 | 0.022666804 |
| ENSG00000113578 | 0.015516751 | 0.024576901 | 0.026045824 | 0.016277433 |
| ENSG00000177469 | 0.016911017 | 0.025577513 | 0.027762657 | 0.015800827 |
| ENSG00000169047 | 0.03233685  | 0.03743855  | 0.035508761 | 0.025831757 |
| ENSG00000172116 | 0.018034524 | 0.026396233 | 0.02537018  | 0.015628111 |
| ENSG00000066294 | 0.058304591 | 0.046627294 | 0.046951207 | 0.047819646 |
| ENSG00000106399 | 0.02968309  | 0.030102604 | 0.028825687 | 0.020534101 |
| ENSG00000100162 | 0.048239151 | 0.03803154  | 0.030495223 | 0.03450353  |
| ENSG00000188338 | 0.01578546  | 0.024705689 | 0.024622818 | 0.015733097 |
| ENSG00000185252 | 0.019054836 | 0.027665873 | 0.025708505 | 0.017883682 |
| ENSG00000169905 | 0.023117244 | 0.031183389 | 0.027429837 | 0.020162542 |
| ENSG00000074211 | 0.017938531 | 0.025968763 | 0.02496045  | 0.015029828 |
| ENSG00000161010 | 0.018787794 | 0.025042135 | 0.027077019 | 0.018834509 |
| ENSG00000163625 | 0.015686288 | 0.02500443  | 0.024173544 | 0.015487662 |
| ENSG00000085274 | 0.0267701   | 0.032866864 | 0.034181224 | 0.021871742 |
| ENSG00000146809 | 0.018431    | 0.025809577 | 0.025565432 | 0.017493038 |
| ENSG00000134075 | 0.024183667 | 0.034515893 | 0.031637081 | 0.023636093 |
| ENSG00000198088 | 0.052337071 | 0.047145938 | 0.043824948 | 0.035425656 |
| ENSG00000039139 | 0.015677686 | 0.025267741 | 0.025153462 | 0.014224439 |
| ENSG00000007171 | 0.018482003 | 0.025863056 | 0.028034846 | 0.016079047 |
| ENSG00000135175 | 0.016380334 | 0.02436459  | 0.024453775 | 0.014737359 |
| ENSG00000100014 | 0.015801538 | 0.025564793 | 0.024175472 | 0.015727238 |
| ENSG00000163218 | 0.021440787 | 0.025740308 | 0.026100401 | 0.017597269 |
| ENSG00000107816 | 0.031619898 | 0.0323438   | 0.030174919 | 0.026844737 |
| ENSG00000091947 | 0.026249411 | 0.030773388 | 0.031635364 | 0.021978077 |
| ENSG00000112414 | 0.015625375 | 0.024295596 | 0.025166268 | 0.015019885 |
| ENSG00000167523 | 0.035163726 | 0.034404392 | 0.035732953 | 0.033555923 |
| ENSG00000138604 | 0.059278457 | 0.050919634 | 0.032658614 | 0.036825283 |
| ENSG00000196937 | 0.042376939 | 0.043484779 | 0.04036711  | 0.036368151 |
| ENSG00000112146 | 0.017724873 | 0.026296936 | 0.027185793 | 0.018536364 |
| ENSG00000122375 | 0.018502731 | 0.024972475 | 0.025214377 | 0.018162738 |
| ENSG00000102760 | 0.081407933 | 0.057562186 | 0.050530622 | 0.062101242 |
| ENSG00000088926 | 0.018380066 | 0.026618079 | 0.026593053 | 0.018012493 |

|                 |             |             |             |             |
|-----------------|-------------|-------------|-------------|-------------|
| ENSG00000185158 | 0.026072868 | 0.030560946 | 0.031053596 | 0.031324398 |
| ENSG00000197901 | 0.015884482 | 0.024620341 | 0.025433599 | 0.015156428 |
| ENSG00000146143 | 0.037379657 | 0.040757462 | 0.032403615 | 0.026190536 |
| ENSG00000205544 | 0.021111248 | 0.027418982 | 0.027570941 | 0.026284887 |
| ENSG00000174514 | 0.018518685 | 0.025452752 | 0.024846852 | 0.016755919 |
| ENSG00000157036 | 0.041105104 | 0.034708283 | 0.03893491  | 0.043603488 |
| ENSG00000136238 | 0.020428085 | 0.028189984 | 0.028987124 | 0.019425833 |
| ENSG0000008438  | 0.015162546 | 0.024332031 | 0.024280171 | 0.014762611 |
| ENSG00000164816 | 0.015199461 | 0.024416969 | 0.02437207  | 0.014259464 |
| ENSG00000099860 | 0.044541726 | 0.045413479 | 0.03923332  | 0.043230977 |
| ENSG00000166025 | 0.016483432 | 0.024931546 | 0.024586861 | 0.014972034 |
| ENSG00000176438 | 0.01599375  | 0.025450359 | 0.025052027 | 0.015781305 |
| ENSG00000105255 | 0.019494736 | 0.029856891 | 0.036383774 | 0.019646667 |
| ENSG00000243156 | 0.085250367 | 0.074355007 | 0.065073435 | 0.063102249 |
| ENSG00000100023 | 0.018228241 | 0.029237718 | 0.028655683 | 0.019566184 |
| ENSG00000171224 | 0.038637248 | 0.044994765 | 0.042519634 | 0.038044642 |
| ENSG00000136931 | 0.018126321 | 0.025846107 | 0.027031164 | 0.016993202 |
| ENSG00000153989 | 0.03107694  | 0.037536002 | 0.035509626 | 0.027494015 |
| ENSG00000148296 | 0.032921626 | 0.032098537 | 0.032249038 | 0.034507515 |
| ENSG00000165475 | 0.044045129 | 0.041746472 | 0.037806057 | 0.044836658 |
| ENSG00000151224 | 0.017072712 | 0.025415864 | 0.026299589 | 0.017334041 |
| ENSG00000105270 | 0.081788394 | 0.04961773  | 0.046448234 | 0.059117992 |
| ENSG00000109625 | 0.017202581 | 0.025339906 | 0.024802894 | 0.015095012 |
| ENSG00000197956 | 0.079404976 | 0.058359698 | 0.05273146  | 0.064157531 |
| ENSG00000001460 | 0.023425622 | 0.026929436 | 0.02688357  | 0.020515244 |
| ENSG00000179902 | 0.013982048 | 0.023991724 | 0.023868765 | 0.015020682 |
| ENSG00000142798 | 0.014678119 | 0.02531863  | 0.02505711  | 0.013933305 |
| ENSG00000125484 | 0.032091665 | 0.03686599  | 0.042220827 | 0.032775457 |
| ENSG00000128000 | 0.017163664 | 0.026742531 | 0.025255277 | 0.015890853 |
| ENSG00000088356 | 0.025337039 | 0.035001605 | 0.040228291 | 0.028547689 |
| ENSG00000146676 | 0.018174854 | 0.027256863 | 0.027501206 | 0.018709992 |
| ENSG00000155367 | 0.018712778 | 0.028567339 | 0.027918307 | 0.019645526 |
| ENSG00000143412 | 0.018134477 | 0.02526551  | 0.026235254 | 0.018197299 |
| ENSG00000178719 | 0.026804249 | 0.048819222 | 0.052529776 | 0.048076204 |
| ENSG00000196659 | 0.016552197 | 0.025999254 | 0.024806581 | 0.016077193 |
| ENSG00000087510 | 0.020589092 | 0.026493961 | 0.027772856 | 0.017788455 |
| ENSG00000179855 | 0.016276919 | 0.025338514 | 0.024376826 | 0.016056305 |
| ENSG00000204140 | 0.014767554 | 0.025552435 | 0.025209068 | 0.01505371  |
| ENSG00000121904 | 0.018747027 | 0.026395615 | 0.026487522 | 0.017311694 |
| ENSG00000180785 | 0.01942855  | 0.025493235 | 0.025735453 | 0.017589044 |
| ENSG00000142039 | 0.028071177 | 0.032991381 | 0.037070995 | 0.032815268 |
| ENSG00000102893 | 0.037164146 | 0.035586135 | 0.03199267  | 0.026540491 |
| ENSG00000171105 | 0.056725728 | 0.048593824 | 0.045735451 | 0.060171354 |
| ENSG00000118257 | 0.020757646 | 0.027844022 | 0.029323901 | 0.028183571 |
| ENSG00000131094 | 0.016108956 | 0.024599247 | 0.024927535 | 0.016039658 |
| ENSG00000183597 | 0.02696827  | 0.032658334 | 0.028905654 | 0.021917367 |
| ENSG00000106006 | 0.016289991 | 0.026247348 | 0.025212867 | 0.017513793 |
| ENSG00000106013 | 0.028080109 | 0.028510164 | 0.026236263 | 0.021427903 |
| ENSG00000111247 | 0.042916993 | 0.037457757 | 0.034836925 | 0.038363751 |
| ENSG00000166736 | 0.048243276 | 0.034755432 | 0.037257345 | 0.027495787 |
| ENSG00000178502 | 0.020528927 | 0.028069508 | 0.028741633 | 0.018905691 |
| ENSG00000143252 | 0.021354488 | 0.026925    | 0.027445539 | 0.018646606 |
| ENSG00000167083 | 0.033214561 | 0.038514575 | 0.033476917 | 0.035693319 |
| ENSG00000078589 | 0.037549896 | 0.040485566 | 0.043221482 | 0.030783617 |

|                 |             |             |             |             |
|-----------------|-------------|-------------|-------------|-------------|
| ENSG00000164120 | 0.034925367 | 0.035718483 | 0.030008776 | 0.048184067 |
| ENSG00000083842 | 0.017394113 | 0.027925469 | 0.026697131 | 0.016286671 |
| ENSG00000126010 | 0.018058163 | 0.025517374 | 0.026187622 | 0.016551347 |
| ENSG00000138395 | 0.015843807 | 0.024610126 | 0.02420455  | 0.014820267 |
| ENSG00000131069 | 0.035093663 | 0.034095555 | 0.029617569 | 0.028239967 |
| ENSG00000105696 | 0.015521189 | 0.025627542 | 0.024670906 | 0.016194736 |
| ENSG00000170373 | 0.016244395 | 0.024864675 | 0.024577778 | 0.015143766 |
| ENSG00000124383 | 0.027015161 | 0.031702596 | 0.034886012 | 0.029731051 |
| ENSG00000083807 | 0.039893145 | 0.046614172 | 0.040786143 | 0.035028687 |
| ENSG00000133083 | 0.015047034 | 0.024746403 | 0.024991621 | 0.014869942 |
| ENSG00000168040 | 0.028210504 | 0.031946207 | 0.035885826 | 0.02719002  |
| ENSG00000188996 | 0.025976106 | 0.031875441 | 0.032194525 | 0.021297561 |
| ENSG00000204941 | 0.015669896 | 0.02479069  | 0.024490772 | 0.016279689 |
| ENSG00000123119 | 0.031902907 | 0.034430888 | 0.036474451 | 0.035755517 |
| ENSG00000132359 | 0.030181528 | 0.027338444 | 0.030204606 | 0.02648375  |
| ENSG00000130755 | 0.031397464 | 0.031070621 | 0.030803793 | 0.024258386 |
| ENSG00000205302 | 0.027268203 | 0.036633737 | 0.033668596 | 0.027540917 |
| ENSG00000143398 | 0.024388369 | 0.032266202 | 0.036088215 | 0.021386752 |
| ENSG00000113583 | 0.029978431 | 0.032736241 | 0.032715005 | 0.023264274 |
| ENSG00000204642 | 0.029413454 | 0.034570406 | 0.033901092 | 0.033723778 |
| ENSG00000138095 | 0.034827156 | 0.04006464  | 0.033385145 | 0.032183225 |
| ENSG00000132549 | 0.016712799 | 0.02686809  | 0.02574305  | 0.017227232 |
| ENSG00000180573 | 0.056078279 | 0.051495375 | 0.049850198 | 0.043313161 |
| ENSG00000141127 | 0.025190667 | 0.030385672 | 0.027893968 | 0.021261535 |
| ENSG00000132313 | 0.032225938 | 0.032205886 | 0.032722751 | 0.035430607 |
| ENSG00000154263 | 0.020719434 | 0.026433121 | 0.026315167 | 0.016537752 |
| ENSG00000154727 | 0.034511426 | 0.046425658 | 0.037347304 | 0.036595812 |
| ENSG00000177084 | 0.026314824 | 0.028485441 | 0.030603318 | 0.021418695 |
| ENSG00000112419 | 0.051914002 | 0.042996467 | 0.036348246 | 0.036093126 |
| ENSG00000123104 | 0.051499516 | 0.052497224 | 0.040761686 | 0.046924321 |
| ENSG00000168246 | 0.049072952 | 0.045071049 | 0.041599533 | 0.0377982   |
| ENSG00000128944 | 0.035913389 | 0.034511954 | 0.03212162  | 0.026839328 |
| ENSG00000101935 | 0.021477754 | 0.027914214 | 0.031186254 | 0.016735029 |
| ENSG00000077943 | 0.01693527  | 0.025759499 | 0.024655338 | 0.016251864 |
| ENSG00000167531 | 0.016710762 | 0.024860237 | 0.024669757 | 0.017629434 |
| ENSG00000112658 | 0.037750667 | 0.040712493 | 0.048310063 | 0.047057456 |
| ENSG00000126895 | 0.015278381 | 0.025944384 | 0.025436317 | 0.014827474 |
| ENSG00000069956 | 0.031494294 | 0.033548554 | 0.033870194 | 0.028591036 |
| ENSG00000196405 | 0.046660867 | 0.040167652 | 0.03894074  | 0.038611516 |
| ENSG00000105204 | 0.020102958 | 0.028973587 | 0.025460846 | 0.021357026 |
| ENSG00000102181 | 0.02972785  | 0.030688623 | 0.032025826 | 0.03131603  |
| ENSG00000106266 | 0.02994993  | 0.035026356 | 0.037955274 | 0.02979814  |
| ENSG00000136167 | 0.019245776 | 0.026573367 | 0.02620969  | 0.020334378 |
| ENSG00000197747 | 0.087318674 | 0.066164494 | 0.049114578 | 0.095067721 |
| ENSG00000177476 | 0.015221646 | 0.024643096 | 0.025404567 | 0.014687132 |
| ENSG00000051382 | 0.036099243 | 0.041783001 | 0.037831225 | 0.042283165 |
| ENSG00000184083 | 0.018401002 | 0.025188574 | 0.024770149 | 0.016182303 |
| ENSG00000104131 | 0.037281556 | 0.043253513 | 0.043590758 | 0.042113415 |
| ENSG00000108666 | 0.036370175 | 0.042540482 | 0.033482328 | 0.029944884 |
| ENSG00000089327 | 0.039632218 | 0.029706378 | 0.031825907 | 0.02736791  |
| ENSG00000167733 | 0.017913576 | 0.02680959  | 0.026812726 | 0.017628122 |
| ENSG00000173599 | 0.016219489 | 0.024788769 | 0.025676518 | 0.015159836 |
| ENSG00000196290 | 0.030739906 | 0.035496688 | 0.031734253 | 0.02044741  |
| ENSG00000116329 | 0.016995077 | 0.025171009 | 0.026615362 | 0.015650941 |



|                 |             |             |             |             |
|-----------------|-------------|-------------|-------------|-------------|
| ENSG00000165617 | 0.059883645 | 0.0435756   | 0.042339072 | 0.039312361 |
| ENSG00000215788 | 0.053848371 | 0.038161002 | 0.026626751 | 0.024840683 |
| ENSG00000150457 | 0.024078796 | 0.032497648 | 0.03023165  | 0.022754415 |
| ENSG00000187678 | 0.032110582 | 0.034393791 | 0.033139978 | 0.030701925 |
| ENSG00000235860 | 0.015636689 | 0.025248471 | 0.025178585 | 0.016199159 |
| ENSG00000163734 | 0.015099099 | 0.025995412 | 0.024857491 | 0.016526434 |
| ENSG00000165805 | 0.015686833 | 0.02485153  | 0.025222701 | 0.014668899 |
| ENSG00000106628 | 0.032033149 | 0.031933924 | 0.033728004 | 0.021575796 |
| ENSG00000157227 | 0.023824666 | 0.026200412 | 0.025784363 | 0.017603264 |
| ENSG00000157856 | 0.016347062 | 0.026128901 | 0.025669766 | 0.016095949 |
| ENSG00000104472 | 0.031457187 | 0.036796638 | 0.036730606 | 0.026889729 |
| ENSG00000238269 | 0.013678382 | 0.023568474 | 0.023812175 | 0.012903844 |
| ENSG00000116035 | 0.016717596 | 0.026215921 | 0.025152784 | 0.015885959 |
| ENSG00000066405 | 0.020039615 | 0.026648534 | 0.026404338 | 0.017766896 |
| ENSG00000124678 | 0.018498228 | 0.024878774 | 0.025523117 | 0.01765432  |
| ENSG00000112308 | 0.022011479 | 0.031057581 | 0.02849659  | 0.017051043 |
| ENSG00000101224 | 0.050005396 | 0.041645945 | 0.041874967 | 0.041662    |
| ENSG00000188785 | 0.03221093  | 0.041281253 | 0.034053514 | 0.02425675  |
| ENSG00000139517 | 0.030550544 | 0.036467932 | 0.033899856 | 0.02452211  |
| ENSG00000127083 | 0.016576511 | 0.025055629 | 0.026077723 | 0.016031532 |
| ENSG00000138772 | 0.114437597 | 0.08086981  | 0.053564226 | 0.059520515 |
| ENSG00000102393 | 0.047231967 | 0.041362301 | 0.036416788 | 0.035227602 |
| ENSG00000153071 | 0.028946161 | 0.026157512 | 0.024731249 | 0.025366492 |
| ENSG00000197785 | 0.035438001 | 0.032182712 | 0.039890403 | 0.036351864 |
| ENSG00000171130 | 0.037201675 | 0.045884506 | 0.039058027 | 0.040547386 |
| ENSG00000010818 | 0.044711164 | 0.03788552  | 0.034977648 | 0.039654575 |
| ENSG00000198911 | 0.025578699 | 0.029908424 | 0.033722057 | 0.02432551  |
| ENSG00000156284 | 0.017017588 | 0.025354165 | 0.024705326 | 0.016176831 |
| ENSG00000139410 | 0.071273883 | 0.057704293 | 0.055070262 | 0.052308928 |
| ENSG00000198816 | 0.075943353 | 0.063861636 | 0.058821748 | 0.064399549 |
| ENSG00000214212 | 0.021860311 | 0.029150025 | 0.027589787 | 0.023623734 |
| ENSG00000116954 | 0.032759332 | 0.041617165 | 0.040287863 | 0.031138166 |
| ENSG00000137831 | 0.042763658 | 0.038590237 | 0.032424238 | 0.035515413 |
| ENSG00000189186 | 0.014654556 | 0.024641814 | 0.024237513 | 0.014780833 |
| ENSG00000122547 | 0.035350978 | 0.031453808 | 0.025954474 | 0.024028062 |
| ENSG00000161835 | 0.035847403 | 0.037109581 | 0.03323215  | 0.028269362 |
| ENSG00000141002 | 0.026379942 | 0.031742056 | 0.03195192  | 0.023347548 |
| ENSG00000253797 | 0.037634754 | 0.0446879   | 0.035675401 | 0.03505205  |
| ENSG00000197122 | 0.015038759 | 0.025074446 | 0.025301414 | 0.015822815 |
| ENSG00000187080 | 0.016340382 | 0.024589839 | 0.025049789 | 0.015782961 |
| ENSG00000124237 | 0.016401953 | 0.02550239  | 0.024970565 | 0.015066176 |
| ENSG00000174348 | 0.022819501 | 0.027877905 | 0.030272229 | 0.021333397 |
| ENSG00000070814 | 0.033149994 | 0.033952039 | 0.033781339 | 0.030544766 |
| ENSG00000170638 | 0.033816805 | 0.033261066 | 0.044482401 | 0.027042354 |
| ENSG00000143436 | 0.026479524 | 0.034265107 | 0.030392673 | 0.021777335 |
| ENSG00000251297 | 0.015937466 | 0.026018003 | 0.024647806 | 0.015139248 |
| ENSG00000179144 | 0.108376664 | 0.082309666 | 0.088637089 | 0.093950468 |
| ENSG00000121289 | 0.025983272 | 0.036167399 | 0.031204052 | 0.026488968 |
| ENSG00000124827 | 0.017591807 | 0.026233622 | 0.025094474 | 0.017019449 |
| ENSG00000043514 | 0.032083244 | 0.034086224 | 0.031998385 | 0.028640383 |
| ENSG00000213931 | 0.092714643 | 0.025508305 | 0.025845227 | 0.032798721 |
| ENSG00000173157 | 0.017416608 | 0.024972856 | 0.025005347 | 0.01546046  |
| ENSG00000085662 | 0.028900736 | 0.035204621 | 0.030198419 | 0.025594837 |
| ENSG00000101367 | 0.023082114 | 0.029883857 | 0.030942511 | 0.023726509 |

|                 |             |             |             |             |
|-----------------|-------------|-------------|-------------|-------------|
| ENSG00000239900 | 0.028659694 | 0.032270121 | 0.030350843 | 0.021835987 |
| ENSG00000187688 | 0.032187112 | 0.040774834 | 0.041593952 | 0.037894184 |
| ENSG00000133997 | 0.036021602 | 0.041494793 | 0.039777101 | 0.045420613 |
| ENSG00000124074 | 0.041726807 | 0.042467603 | 0.035048324 | 0.033545334 |
| ENSG00000213160 | 0.036021294 | 0.036665777 | 0.032811196 | 0.030500588 |
| ENSG00000186803 | 0.015763084 | 0.025278158 | 0.024862517 | 0.014975237 |
| ENSG00000132481 | 0.046378951 | 0.042183194 | 0.044202055 | 0.05414898  |
| ENSG00000166352 | 0.089486173 | 0.086113754 | 0.061504719 | 0.08588635  |
| ENSG00000239779 | 0.023649338 | 0.029710419 | 0.031068776 | 0.02349157  |
| ENSG00000130413 | 0.041069685 | 0.037519105 | 0.029532181 | 0.028572092 |
| ENSG00000061273 | 0.017475283 | 0.025607411 | 0.025010309 | 0.015447702 |
| ENSG00000015171 | 0.036950862 | 0.043067055 | 0.03400198  | 0.036133455 |
| ENSG00000134247 | 0.055319469 | 0.045670201 | 0.025323334 | 0.017860943 |
| ENSG00000115042 | 0.032877116 | 0.033302757 | 0.035182826 | 0.029065774 |
| ENSG00000213246 | 0.030779972 | 0.035170389 | 0.039326441 | 0.031992141 |
| ENSG00000166743 | 0.021541332 | 0.026922815 | 0.027998544 | 0.018613152 |
| ENSG00000144460 | 0.017006738 | 0.025122123 | 0.024820148 | 0.016071833 |
| ENSG00000106125 | 0.036793102 | 0.036196199 | 0.030949096 | 0.028169333 |
| ENSG00000160446 | 0.027400803 | 0.030283574 | 0.030609314 | 0.026262463 |
| ENSG00000160255 | 0.046409816 | 0.038523398 | 0.040096042 | 0.036486566 |
| ENSG00000166484 | 0.021219054 | 0.030531265 | 0.032064663 | 0.023425936 |
| ENSG00000196866 | 0.045719238 | 0.038996095 | 0.038632297 | 0.034621249 |
| ENSG00000077327 | 0.039056899 | 0.034347695 | 0.029878034 | 0.027585059 |
| ENSG00000168811 | 0.06215239  | 0.052748883 | 0.051650508 | 0.053799373 |
| ENSG00000239605 | 0.016029801 | 0.026694408 | 0.02588845  | 0.015501663 |
| ENSG00000133392 | 0.032519811 | 0.028659698 | 0.037987962 | 0.032071383 |
| ENSG00000103274 | 0.024828629 | 0.03130151  | 0.031773241 | 0.025331644 |
| ENSG00000005339 | 0.029616641 | 0.037075475 | 0.035148124 | 0.030007253 |
| ENSG00000120656 | 0.028938933 | 0.03456839  | 0.031421839 | 0.023646317 |
| ENSG00000130021 | 0.054584562 | 0.051695904 | 0.057221712 | 0.04731959  |
| ENSG00000196661 | 0.015555824 | 0.024606447 | 0.025740694 | 0.015473324 |
| ENSG00000118454 | 0.034861688 | 0.039981795 | 0.032653527 | 0.03644078  |
| ENSG00000100650 | 0.022442804 | 0.034037482 | 0.031738395 | 0.024494762 |
| ENSG00000178896 | 0.025259304 | 0.028787864 | 0.031472762 | 0.025617015 |
| ENSG00000105447 | 0.038144314 | 0.036798169 | 0.04562937  | 0.040161617 |
| ENSG00000213402 | 0.03825903  | 0.037529644 | 0.03765021  | 0.036174218 |
| ENSG00000166863 | 0.016140297 | 0.024971478 | 0.025881366 | 0.016140494 |
| ENSG00000221909 | 0.03787729  | 0.03663676  | 0.038407419 | 0.035990327 |
| ENSG00000138378 | 0.046018964 | 0.038231908 | 0.037444904 | 0.034113897 |
| ENSG00000215012 | 0.037801579 | 0.031689109 | 0.03262577  | 0.02701714  |
| ENSG00000132821 | 0.02975786  | 0.027718975 | 0.025653406 | 0.020829056 |
| ENSG00000166135 | 0.022888575 | 0.031743587 | 0.027996482 | 0.023048729 |
| ENSG00000170571 | 0.056015401 | 0.063965702 | 0.060269538 | 0.055552248 |
| ENSG00000072803 | 0.023769493 | 0.030366354 | 0.030794853 | 0.023092435 |
| ENSG00000203993 | 0.031110687 | 0.034640023 | 0.03404458  | 0.02414376  |
| ENSG00000187957 | 0.017608102 | 0.025199845 | 0.025912271 | 0.015535317 |
| ENSG00000100401 | 0.030368792 | 0.035541078 | 0.032162257 | 0.031616756 |
| ENSG00000011201 | 0.049327284 | 0.024981251 | 0.025407479 | 0.021664622 |
| ENSG00000175206 | 0.015605384 | 0.024692868 | 0.02623245  | 0.015145499 |
| ENSG00000145293 | 0.033443059 | 0.035210792 | 0.031199605 | 0.023374089 |
| ENSG00000177548 | 0.032908372 | 0.03534609  | 0.031650202 | 0.029500084 |
| ENSG00000150361 | 0.016209772 | 0.024661897 | 0.025150801 | 0.014744924 |
| ENSG00000164197 | 0.053459983 | 0.035381012 | 0.026153047 | 0.022280966 |
| ENSG00000137648 | 0.016980057 | 0.025407906 | 0.026948706 | 0.016187836 |

|                 |             |             |             |             |
|-----------------|-------------|-------------|-------------|-------------|
| ENSG00000170270 | 0.040426519 | 0.039953247 | 0.041116438 | 0.036593632 |
| ENSG00000184634 | 0.027877438 | 0.039821366 | 0.032382752 | 0.027353944 |
| ENSG00000184261 | 0.078062054 | 0.05907718  | 0.054625398 | 0.067595485 |
| ENSG00000135747 | 0.018561446 | 0.027260859 | 0.027709552 | 0.017082254 |
| ENSG00000196335 | 0.015673342 | 0.025418171 | 0.024333475 | 0.014769259 |
| ENSG00000167491 | 0.025524244 | 0.031193455 | 0.036057487 | 0.027345523 |
| ENSG00000175193 | 0.021834362 | 0.027677    | 0.030717355 | 0.021841743 |
| ENSG00000133812 | 0.016832484 | 0.02539875  | 0.025142954 | 0.017283453 |
| ENSG00000124208 | 0.017932673 | 0.02887969  | 0.026082079 | 0.017672293 |
| ENSG00000242413 | 0.01657074  | 0.026059377 | 0.02508953  | 0.016136573 |
| ENSG00000143631 | 0.015758165 | 0.026148397 | 0.024717634 | 0.015836031 |
| ENSG00000081248 | 0.014913635 | 0.025748619 | 0.025084276 | 0.015661795 |
| ENSG00000147117 | 0.016374103 | 0.025736824 | 0.025129581 | 0.014503616 |
| ENSG00000232427 | 0.029120187 | 0.034024891 | 0.038154667 | 0.024708915 |
| ENSG00000172465 | 0.028106488 | 0.034861351 | 0.033748711 | 0.024981764 |
| ENSG00000179921 | 0.016648985 | 0.025508502 | 0.024941219 | 0.015352618 |
| ENSG00000205213 | 0.086367647 | 0.057437782 | 0.052330939 | 0.060218584 |
| ENSG00000115648 | 0.026306467 | 0.025884114 | 0.025305038 | 0.023019875 |
| ENSG00000137713 | 0.014235222 | 0.024938212 | 0.024392427 | 0.014947627 |
| ENSG00000204540 | 0.09112392  | 0.069680626 | 0.072939169 | 0.111037799 |
| ENSG00000155366 | 0.027888154 | 0.033296822 | 0.030849862 | 0.031049136 |
| ENSG00000168522 | 0.018510357 | 0.028563213 | 0.028108278 | 0.020239003 |
| ENSG00000178226 | 0.016213892 | 0.025081558 | 0.026420799 | 0.016938403 |
| ENSG00000185947 | 0.036985769 | 0.039288673 | 0.037512376 | 0.04568451  |
| ENSG00000144331 | 0.016874864 | 0.026258801 | 0.024934809 | 0.016115367 |
| ENSG00000112701 | 0.027745462 | 0.036685922 | 0.030627618 | 0.031130071 |
| ENSG00000065268 | 0.04459628  | 0.04150228  | 0.037670263 | 0.033910831 |
| ENSG00000164164 | 0.035015982 | 0.044938692 | 0.043073409 | 0.033132142 |
| ENSG00000152760 | 0.014802827 | 0.025029142 | 0.025343608 | 0.016305745 |
| ENSG00000166548 | 0.067080299 | 0.074493598 | 0.080217769 | 0.081196116 |
| ENSG00000142937 | 0.01542602  | 0.024323264 | 0.025110411 | 0.016033522 |
| ENSG00000179091 | 0.021976    | 0.026024016 | 0.025927298 | 0.020477947 |
| ENSG00000105501 | 0.026763309 | 0.033562493 | 0.030209556 | 0.023167389 |
| ENSG00000160298 | 0.016053757 | 0.02499437  | 0.025495982 | 0.014868693 |
| ENSG00000167755 | 0.016206146 | 0.025192594 | 0.024670591 | 0.016909965 |
| ENSG00000187773 | 0.018557904 | 0.028130841 | 0.026751579 | 0.02028737  |
| ENSG00000122180 | 0.015608618 | 0.024803052 | 0.025001327 | 0.014363665 |
| ENSG00000054277 | 0.046885866 | 0.061335673 | 0.044144631 | 0.043888987 |
| ENSG00000147485 | 0.054693584 | 0.070406522 | 0.026223521 | 0.016384754 |
| ENSG00000203883 | 0.181874847 | 0.124408477 | 0.104862399 | 0.138580591 |
| ENSG00000142677 | 0.015255097 | 0.024883218 | 0.025294976 | 0.015411789 |
| ENSG00000184545 | 0.029728767 | 0.042068279 | 0.039544326 | 0.030059238 |
| ENSG00000049860 | 0.026858379 | 0.028489404 | 0.02815704  | 0.020036226 |
| ENSG00000008853 | 0.031515471 | 0.039203371 | 0.041635487 | 0.045645742 |
| ENSG00000100968 | 0.019422285 | 0.02640471  | 0.025185873 | 0.017975636 |
| ENSG00000171469 | 0.021551503 | 0.027449851 | 0.027993096 | 0.016565524 |
| ENSG00000174279 | 0.016035959 | 0.024913682 | 0.024550603 | 0.01496062  |
| ENSG00000198945 | 0.039938835 | 0.037321658 | 0.038794217 | 0.030202919 |
| ENSG00000176978 | 0.030789704 | 0.031317542 | 0.032372598 | 0.028950051 |
| ENSG00000159374 | 0.026274171 | 0.02941871  | 0.036318639 | 0.020929106 |
| ENSG00000132003 | 0.037645231 | 0.042060483 | 0.033407969 | 0.033473113 |
| ENSG00000167850 | 0.041944561 | 0.041493464 | 0.037022603 | 0.022343424 |
| ENSG00000151468 | 0.016666611 | 0.02544532  | 0.02621751  | 0.023407222 |
| ENSG00000113971 | 0.038012298 | 0.04428964  | 0.038749166 | 0.039881845 |

|                 |             |             |             |             |
|-----------------|-------------|-------------|-------------|-------------|
| ENSG00000177200 | 0.028284581 | 0.033731296 | 0.02951725  | 0.023798353 |
| ENSG00000187231 | 0.04820782  | 0.049263515 | 0.049247285 | 0.049807812 |
| ENSG00000174529 | 0.014465153 | 0.024280222 | 0.024777756 | 0.014508823 |
| ENSG00000113739 | 0.025269475 | 0.02733863  | 0.027432479 | 0.020368594 |
| ENSG00000167635 | 0.024975478 | 0.030857907 | 0.029481581 | 0.026754395 |
| ENSG00000147535 | 0.036101381 | 0.034226229 | 0.037500944 | 0.036938269 |
| ENSG00000131196 | 0.061126358 | 0.049655252 | 0.047011353 | 0.041536245 |
| ENSG00000137171 | 0.018641893 | 0.026531521 | 0.025391429 | 0.017462125 |
| ENSG00000101247 | 0.018434697 | 0.02555168  | 0.029180036 | 0.016410184 |
| ENSG00000198930 | 0.016924698 | 0.025390681 | 0.025605631 | 0.0169178   |
| ENSG00000185920 | 0.030127228 | 0.034849269 | 0.030842313 | 0.024192972 |
| ENSG00000136104 | 0.033324377 | 0.034437678 | 0.032537192 | 0.027799617 |
| ENSG00000164082 | 0.016155087 | 0.024313423 | 0.024726717 | 0.015875898 |
| ENSG00000125144 | 0.03025373  | 0.035917175 | 0.065606671 | 0.038540949 |
| ENSG00000161944 | 0.015432015 | 0.02567285  | 0.025897537 | 0.015929328 |
| ENSG00000011422 | 0.077675608 | 0.066327689 | 0.064776375 | 0.053952502 |
| ENSG00000068903 | 0.024722686 | 0.027756931 | 0.029822069 | 0.023973864 |
| ENSG00000198917 | 0.023915072 | 0.031103116 | 0.029160821 | 0.025508566 |
| ENSG00000168002 | 0.024947634 | 0.027685681 | 0.027059268 | 0.020483244 |
| ENSG00000122515 | 0.046503607 | 0.042177373 | 0.033538395 | 0.037142788 |
| ENSG00000204103 | 0.022295728 | 0.032613951 | 0.03292509  | 0.029299587 |
| ENSG00000187823 | 0.015844756 | 0.024740041 | 0.024602966 | 0.015081112 |
| ENSG00000165672 | 0.026592903 | 0.032504354 | 0.029564471 | 0.019891817 |
| ENSG00000115325 | 0.039332861 | 0.031683115 | 0.033519574 | 0.032829382 |
| ENSG00000196208 | 0.018632655 | 0.028369386 | 0.027030515 | 0.019113832 |
| ENSG00000185231 | 0.016384826 | 0.024817506 | 0.025333585 | 0.015519316 |
| ENSG00000108576 | 0.092702057 | 0.072221262 | 0.04273587  | 0.076443857 |
| ENSG00000093217 | 0.035074499 | 0.037584649 | 0.028333129 | 0.023736543 |
| ENSG00000182150 | 0.017012006 | 0.025763613 | 0.025195301 | 0.017887727 |
| ENSG00000102886 | 0.029586225 | 0.035942866 | 0.034288409 | 0.035474801 |
| ENSG00000143322 | 0.015270878 | 0.025338936 | 0.025882578 | 0.014819493 |
| ENSG00000240184 | 0.017144905 | 0.026370486 | 0.024761601 | 0.015094244 |
| ENSG00000101892 | 0.01568629  | 0.024803004 | 0.0249784   | 0.015630579 |
| ENSG00000134899 | 0.026646614 | 0.032029571 | 0.030636993 | 0.020455953 |
| ENSG00000164220 | 0.015269751 | 0.02553816  | 0.025200564 | 0.014858945 |
| ENSG00000123609 | 0.030631008 | 0.032108584 | 0.030551457 | 0.029663591 |
| ENSG00000143278 | 0.017095385 | 0.027584683 | 0.025308024 | 0.016240499 |
| ENSG00000197128 | 0.032663613 | 0.033796521 | 0.028910843 | 0.031788373 |
| ENSG00000115685 | 0.030568989 | 0.033878198 | 0.033518417 | 0.025015135 |
| ENSG00000141527 | 0.016836244 | 0.024952448 | 0.02513728  | 0.015173248 |
| ENSG00000136698 | 0.016592309 | 0.024748484 | 0.024542079 | 0.016417879 |
| ENSG00000140285 | 0.015248015 | 0.025668846 | 0.025597967 | 0.01530509  |
| ENSG00000124429 | 0.094941618 | 0.07064005  | 0.069197736 | 0.055386954 |
| ENSG00000128052 | 0.014977503 | 0.025670972 | 0.024285714 | 0.014729313 |
| ENSG00000176495 | 0.016540435 | 0.026582936 | 0.026101804 | 0.015011248 |
| ENSG00000162771 | 0.014747215 | 0.025218819 | 0.02581218  | 0.01589909  |
| ENSG00000135472 | 0.017840098 | 0.02563299  | 0.025179845 | 0.01789227  |
| ENSG00000171987 | 0.017354171 | 0.027880462 | 0.026881841 | 0.015957136 |
| ENSG00000164237 | 0.061568866 | 0.066085395 | 0.050916418 | 0.059090956 |
| ENSG00000141293 | 0.037118705 | 0.039307114 | 0.036819597 | 0.03307259  |
| ENSG00000133119 | 0.03638518  | 0.03711902  | 0.03542287  | 0.035347804 |
| ENSG00000102882 | 0.032041203 | 0.034873439 | 0.03486486  | 0.026884199 |
| ENSG00000131080 | 0.021671221 | 0.028843481 | 0.029699379 | 0.017664745 |
| ENSG00000163528 | 0.039056705 | 0.037560417 | 0.037784857 | 0.026155073 |

|                 |             |             |             |             |
|-----------------|-------------|-------------|-------------|-------------|
| ENSG0000009089  | 0.030035531 | 0.033698884 | 0.032697183 | 0.025699669 |
| ENSG00000143811 | 0.027288159 | 0.031958264 | 0.029878871 | 0.023542587 |
| ENSG00000004776 | 0.017118905 | 0.025968816 | 0.026086556 | 0.017258488 |
| ENSG00000126070 | 0.032348217 | 0.036248804 | 0.033925041 | 0.023785946 |
| ENSG00000132356 | 0.029272904 | 0.033126639 | 0.039032064 | 0.028417638 |
| ENSG00000166509 | 0.015939936 | 0.025765873 | 0.025627072 | 0.014900941 |
| ENSG00000126457 | 0.023560136 | 0.025919675 | 0.02643307  | 0.022616614 |
| ENSG00000187474 | 0.01826318  | 0.027687907 | 0.026804046 | 0.017329626 |
| ENSG00000021776 | 0.024001109 | 0.031385187 | 0.031718744 | 0.02179346  |
| ENSG00000084636 | 0.070717359 | 0.074050675 | 0.057290883 | 0.061779136 |
| ENSG00000183423 | 0.015704624 | 0.025456317 | 0.024806776 | 0.01569187  |
| ENSG00000136943 | 0.028016987 | 0.03274382  | 0.037773617 | 0.029405906 |
| ENSG00000184887 | 0.043529261 | 0.043974461 | 0.039705058 | 0.033459711 |
| ENSG00000113924 | 0.015350068 | 0.025610957 | 0.024014483 | 0.015944732 |
| ENSG00000117859 | 0.015742868 | 0.024882924 | 0.025518208 | 0.014684132 |
| ENSG00000111801 | 0.039330635 | 0.037755575 | 0.032397694 | 0.03749339  |
| ENSG00000113758 | 0.015825371 | 0.025385558 | 0.02528095  | 0.015902215 |
| ENSG00000006712 | 0.024439765 | 0.027881499 | 0.030452863 | 0.027307602 |
| ENSG00000177807 | 0.017520971 | 0.026117007 | 0.026704579 | 0.014923718 |
| ENSG00000110693 | 0.016793701 | 0.024799206 | 0.025351014 | 0.017103659 |
| ENSG00000163793 | 0.017429588 | 0.025686903 | 0.026052598 | 0.016440626 |
| ENSG00000102996 | 0.062838817 | 0.069143604 | 0.057284406 | 0.085750526 |
| ENSG00000143369 | 0.021496567 | 0.026620888 | 0.027076323 | 0.020337577 |
| ENSG00000128274 | 0.097389657 | 0.074378094 | 0.06486461  | 0.0725772   |
| ENSG00000104967 | 0.014992052 | 0.024652231 | 0.024290546 | 0.015408119 |
| ENSG00000125775 | 0.022932648 | 0.029096122 | 0.0306958   | 0.020050072 |
| ENSG00000182974 | 0.016272463 | 0.025714818 | 0.024309428 | 0.014731789 |
| ENSG00000032742 | 0.03513459  | 0.033790553 | 0.033070635 | 0.03500403  |
| ENSG00000184371 | 0.021423812 | 0.02784904  | 0.026873075 | 0.020588422 |
| ENSG00000184164 | 0.047886266 | 0.043023345 | 0.049879983 | 0.055944821 |
| ENSG00000105982 | 0.018735568 | 0.028085525 | 0.026667058 | 0.023233293 |
| ENSG00000100678 | 0.016498164 | 0.025437327 | 0.02457237  | 0.016209572 |
| ENSG00000131323 | 0.031961599 | 0.034242844 | 0.033178604 | 0.032156823 |
| ENSG00000145491 | 0.015442587 | 0.025502024 | 0.02642411  | 0.016337495 |
| ENSG00000173083 | 0.029884642 | 0.031788104 | 0.034451199 | 0.028870376 |
| ENSG00000124535 | 0.028326    | 0.036924676 | 0.030495887 | 0.022728708 |
| ENSG00000169245 | 0.152224868 | 0.172931103 | 0.107133358 | 0.144717473 |
| ENSG00000057657 | 0.044186459 | 0.03726856  | 0.037712376 | 0.037884045 |
| ENSG00000186509 | 0.016492446 | 0.025389586 | 0.024561596 | 0.015616868 |
| ENSG00000181619 | 0.0165115   | 0.02443386  | 0.025845616 | 0.015358996 |
| ENSG00000174021 | 0.02436534  | 0.029968973 | 0.029240325 | 0.024708945 |
| ENSG00000077254 | 0.016235907 | 0.025615849 | 0.025643397 | 0.016128616 |
| ENSG00000006652 | 0.034426114 | 0.038772835 | 0.03650593  | 0.026537583 |
| ENSG00000172155 | 0.037234698 | 0.027711236 | 0.026112772 | 0.021319637 |
| ENSG00000163431 | 0.016565103 | 0.02557905  | 0.024900867 | 0.014823037 |
| ENSG00000189060 | 0.082492264 | 0.064413849 | 0.04842888  | 0.059478494 |
| ENSG00000198963 | 0.015643321 | 0.0256016   | 0.024739647 | 0.014824808 |
| ENSG00000156959 | 0.015903062 | 0.025389086 | 0.025712476 | 0.015424566 |
| ENSG00000112186 | 0.016248352 | 0.027064806 | 0.024851482 | 0.01453492  |
| ENSG00000120709 | 0.029959787 | 0.039435767 | 0.043511324 | 0.027677995 |
| ENSG00000184895 | 0.016079471 | 0.026616348 | 0.024815071 | 0.014560506 |
| ENSG00000189283 | 0.043934468 | 0.041120997 | 0.042920573 | 0.042503887 |
| ENSG00000166441 | 0.015899977 | 0.024412297 | 0.023928904 | 0.020492045 |
| ENSG00000076662 | 0.02433363  | 0.033760662 | 0.032110286 | 0.028623817 |

|                 |             |             |             |             |
|-----------------|-------------|-------------|-------------|-------------|
| ENSG00000115084 | 0.033895819 | 0.03786914  | 0.039104285 | 0.031946075 |
| ENSG00000140749 | 0.016730897 | 0.024752815 | 0.025102604 | 0.016216129 |
| ENSG00000250565 | 0.037511596 | 0.036676108 | 0.032214768 | 0.03001075  |
| ENSG00000176358 | 0.017279257 | 0.025386292 | 0.025812018 | 0.016829768 |
| ENSG00000101019 | 0.025994648 | 0.031852921 | 0.031650636 | 0.024816692 |
| ENSG00000157368 | 0.016222673 | 0.025707051 | 0.024544254 | 0.015011915 |
| ENSG00000169800 | 0.017791484 | 0.026439952 | 0.026172999 | 0.017188031 |
| ENSG00000149435 | 0.016807515 | 0.025561002 | 0.024841831 | 0.017169588 |
| ENSG00000183454 | 0.034418424 | 0.027910867 | 0.025248028 | 0.01601415  |
| ENSG00000070031 | 0.026307759 | 0.043185225 | 0.03764324  | 0.051294511 |
| ENSG00000172638 | 0.039272669 | 0.041895943 | 0.036345269 | 0.048612304 |
| ENSG00000026036 | 0.018978505 | 0.027512129 | 0.025393667 | 0.017119034 |
| ENSG00000096872 | 0.034167971 | 0.038211442 | 0.03333206  | 0.03366383  |
| ENSG00000221864 | 0.015444654 | 0.024921992 | 0.024654246 | 0.015003221 |
| ENSG00000198042 | 0.031218469 | 0.038035622 | 0.039401226 | 0.034179409 |
| ENSG00000110711 | 0.02412175  | 0.027762278 | 0.031548019 | 0.024010999 |
| ENSG00000122707 | 0.044395677 | 0.053571864 | 0.040010563 | 0.050192939 |
| ENSG00000165168 | 0.058527988 | 0.050211814 | 0.044563974 | 0.04770577  |
| ENSG00000173960 | 0.025131539 | 0.031342743 | 0.03604132  | 0.023414798 |
| ENSG00000165156 | 0.026291723 | 0.031718681 | 0.03723927  | 0.025784617 |
| ENSG00000118307 | 0.029707645 | 0.029665143 | 0.033377684 | 0.02038269  |
| ENSG00000105668 | 0.051562682 | 0.055519638 | 0.047686754 | 0.062844276 |
| ENSG00000127838 | 0.015736575 | 0.025265631 | 0.024419632 | 0.014797889 |
| ENSG00000224916 | 0.014505197 | 0.024537744 | 0.02472937  | 0.014904781 |
| ENSG00000198964 | 0.056815163 | 0.047172441 | 0.039188174 | 0.042812234 |
| ENSG00000085733 | 0.058569059 | 0.055849705 | 0.049225963 | 0.049733211 |
| ENSG00000051180 | 0.023673385 | 0.0277675   | 0.028950312 | 0.021136269 |
| ENSG00000113318 | 0.029092907 | 0.030532384 | 0.032338435 | 0.025432301 |
| ENSG00000010017 | 0.03055565  | 0.041970421 | 0.035727377 | 0.031717456 |
| ENSG00000106443 | 0.029181375 | 0.033941566 | 0.035401933 | 0.026496514 |
| ENSG00000107859 | 0.016916299 | 0.025382079 | 0.025485557 | 0.014868578 |
| ENSG00000143106 | 0.021836246 | 0.028650214 | 0.026443989 | 0.021204941 |
| ENSG00000160051 | 0.040028145 | 0.039750815 | 0.038804523 | 0.032051941 |
| ENSG00000169989 | 0.016668807 | 0.0246871   | 0.02524302  | 0.015174178 |
| ENSG00000177683 | 0.04850705  | 0.032635673 | 0.036205725 | 0.046637088 |
| ENSG00000186111 | 0.055824947 | 0.039963767 | 0.041694707 | 0.040922275 |
| ENSG00000213614 | 0.017693222 | 0.025215376 | 0.026608239 | 0.016912157 |
| ENSG00000164465 | 0.037510283 | 0.031502495 | 0.033878603 | 0.028457264 |
| ENSG00000118680 | 0.017887153 | 0.027299804 | 0.026508356 | 0.018824328 |
| ENSG00000103222 | 0.027531298 | 0.035057611 | 0.02881651  | 0.024492807 |
| ENSG00000129455 | 0.017484314 | 0.025767201 | 0.024788652 | 0.0171534   |
| ENSG00000135423 | 0.024439001 | 0.032661107 | 0.031082151 | 0.022451122 |
| ENSG00000132698 | 0.016600416 | 0.025383171 | 0.02569076  | 0.015878407 |
| ENSG00000171446 | 0.01670211  | 0.023942524 | 0.024647231 | 0.015427103 |
| ENSG00000006659 | 0.023014641 | 0.027509911 | 0.028954754 | 0.020530085 |
| ENSG00000122122 | 0.032816403 | 0.037073793 | 0.038281161 | 0.032200924 |
| ENSG00000005302 | 0.027302063 | 0.031752733 | 0.02959624  | 0.027135841 |
| ENSG00000164306 | 0.042423534 | 0.047143633 | 0.034577284 | 0.030205786 |
| ENSG00000163017 | 0.017117959 | 0.026541003 | 0.025053961 | 0.015931914 |
| ENSG00000144820 | 0.015797973 | 0.02538636  | 0.025684509 | 0.015506954 |
| ENSG00000104064 | 0.033522401 | 0.0381049   | 0.039235204 | 0.036209643 |
| ENSG00000150967 | 0.017482627 | 0.024570325 | 0.024709305 | 0.015055966 |
| ENSG00000168061 | 0.042731819 | 0.038394246 | 0.039447111 | 0.041102785 |
| ENSG00000184344 | 0.016225217 | 0.024977039 | 0.025345865 | 0.016299668 |

|                 |             |             |             |             |
|-----------------|-------------|-------------|-------------|-------------|
| ENSG00000090581 | 0.021884071 | 0.029979525 | 0.029379989 | 0.026824499 |
| ENSG00000119326 | 0.049623073 | 0.047311399 | 0.038265101 | 0.035604913 |
| ENSG00000163923 | 0.05144443  | 0.039476159 | 0.035732347 | 0.031955255 |
| ENSG00000134716 | 0.072665964 | 0.056951257 | 0.05314609  | 0.063813231 |
| ENSG00000166233 | 0.029134333 | 0.0349006   | 0.033967217 | 0.025827564 |
| ENSG00000145113 | 0.024902649 | 0.026490266 | 0.026226357 | 0.017886829 |
| ENSG00000125734 | 0.025689082 | 0.028533166 | 0.032950221 | 0.030310517 |
| ENSG00000117707 | 0.018943957 | 0.025146237 | 0.025218993 | 0.015949855 |
| ENSG00000117385 | 0.032316972 | 0.0363143   | 0.036535599 | 0.027688208 |
| ENSG00000136634 | 0.071979487 | 0.064682343 | 0.057519803 | 0.062709617 |
| ENSG00000164754 | 0.025236415 | 0.031580122 | 0.027893554 | 0.022801666 |
| ENSG00000186522 | 0.078697687 | 0.052990474 | 0.04824913  | 0.063817445 |
| ENSG00000117036 | 0.028430909 | 0.031478475 | 0.029100192 | 0.020373733 |
| ENSG00000185722 | 0.024079642 | 0.029943126 | 0.029869562 | 0.021270738 |
| ENSG00000185989 | 0.058222533 | 0.047543565 | 0.047153577 | 0.045743219 |
| ENSG00000126261 | 0.044233835 | 0.051817536 | 0.04700009  | 0.043389246 |
| ENSG00000116133 | 0.031048439 | 0.033634273 | 0.038123655 | 0.036841551 |
| ENSG00000173612 | 0.0176229   | 0.024872913 | 0.024464231 | 0.015262098 |
| ENSG00000177511 | 0.013886285 | 0.025124088 | 0.025783157 | 0.014799761 |
| ENSG00000173208 | 0.029378744 | 0.03147552  | 0.027460898 | 0.028518243 |
| ENSG00000140600 | 0.016937814 | 0.02430904  | 0.025423252 | 0.016064697 |
| ENSG00000138472 | 0.015218198 | 0.025006957 | 0.024892688 | 0.015189493 |
| ENSG00000177875 | 0.01905105  | 0.027160904 | 0.026397351 | 0.020692547 |
| ENSG00000112039 | 0.04244499  | 0.040107629 | 0.033066208 | 0.032278639 |
| ENSG00000158815 | 0.014991215 | 0.024554284 | 0.025596363 | 0.014108742 |
| ENSG00000183862 | 0.016549433 | 0.025459229 | 0.026754776 | 0.016219853 |
| ENSG00000168769 | 0.030064375 | 0.033556678 | 0.034595257 | 0.027075876 |
| ENSG00000150281 | 0.015309758 | 0.024267391 | 0.025821625 | 0.016056476 |
| ENSG00000110324 | 0.051148399 | 0.061318659 | 0.062802319 | 0.038005343 |
| ENSG00000160124 | 0.044062655 | 0.051338335 | 0.048536466 | 0.037078778 |
| ENSG00000123999 | 0.016312802 | 0.026503328 | 0.025283197 | 0.015020938 |
| ENSG00000187045 | 0.032785068 | 0.042582356 | 0.039790021 | 0.033922432 |
| ENSG00000171051 | 0.017798272 | 0.026846171 | 0.029315627 | 0.017601402 |
| ENSG00000118418 | 0.025419146 | 0.030163825 | 0.028399077 | 0.021564696 |
| ENSG00000151005 | 0.015807931 | 0.026147835 | 0.025115742 | 0.017096435 |
| ENSG00000176473 | 0.021854715 | 0.028243617 | 0.026279996 | 0.019570921 |
| ENSG00000137309 | 0.017294066 | 0.025198489 | 0.025747029 | 0.014132935 |
| ENSG00000205409 | 0.013249167 | 0.023405671 | 0.023504969 | 0.013211756 |
| ENSG00000221931 | 0.013346544 | 0.02365346  | 0.024396195 | 0.014086034 |
| ENSG00000162747 | 0.017131732 | 0.025581964 | 0.024868514 | 0.014844089 |
| ENSG00000118162 | 0.031299653 | 0.035749995 | 0.032789438 | 0.029774513 |
| ENSG00000103647 | 0.015482059 | 0.024750793 | 0.025334355 | 0.016613035 |
| ENSG00000067704 | 0.025479957 | 0.033006186 | 0.028567977 | 0.023543833 |
| ENSG00000225968 | 0.017367002 | 0.024962583 | 0.026014286 | 0.016012024 |
| ENSG00000111912 | 0.033089218 | 0.039913742 | 0.038594032 | 0.036432874 |
| ENSG00000123268 | 0.034924638 | 0.03663957  | 0.034472665 | 0.02986508  |
| ENSG00000073584 | 0.023129734 | 0.030913796 | 0.033841927 | 0.019490297 |
| ENSG00000115267 | 0.038249325 | 0.032898872 | 0.033146767 | 0.031696262 |
| ENSG00000104529 | 0.01685128  | 0.024835564 | 0.024826151 | 0.016444886 |
| ENSG00000047230 | 0.020838666 | 0.025501115 | 0.02773372  | 0.019931271 |
| ENSG00000212126 | 0.018262082 | 0.028959086 | 0.0270872   | 0.017593564 |
| ENSG00000172893 | 0.03097189  | 0.033323869 | 0.038706098 | 0.031549966 |
| ENSG00000163946 | 0.01608958  | 0.025958098 | 0.025947784 | 0.01999814  |
| ENSG00000100321 | 0.101474775 | 0.083529914 | 0.062175812 | 0.068764307 |

|                 |             |             |             |             |
|-----------------|-------------|-------------|-------------|-------------|
| ENSG00000168546 | 0.019314908 | 0.026617804 | 0.028351926 | 0.01571722  |
| ENSG00000164920 | 0.090770432 | 0.081856946 | 0.066241329 | 0.081382032 |
| ENSG00000112245 | 0.027022919 | 0.034923115 | 0.038082676 | 0.028984245 |
| ENSG00000147202 | 0.036684428 | 0.040176049 | 0.037131532 | 0.029289653 |
| ENSG00000198522 | 0.0244088   | 0.030139158 | 0.030904198 | 0.020566189 |
| ENSG00000077274 | 0.018076503 | 0.02535749  | 0.028204898 | 0.018753743 |
| ENSG00000166923 | 0.017729824 | 0.02514774  | 0.025686918 | 0.017097741 |
| ENSG00000165626 | 0.016069074 | 0.02594954  | 0.024576613 | 0.015104784 |
| ENSG00000079841 | 0.016336143 | 0.027109355 | 0.026565914 | 0.016985046 |
| ENSG00000161970 | 0.016235297 | 0.024585478 | 0.024212904 | 0.017915422 |
| ENSG00000162129 | 0.016436424 | 0.025792465 | 0.025706109 | 0.017094642 |
| ENSG00000109436 | 0.102317843 | 0.089555074 | 0.077825601 | 0.096702696 |
| ENSG00000122986 | 0.035349986 | 0.033318666 | 0.03454812  | 0.038644162 |
| ENSG00000187994 | 0.029624471 | 0.031185519 | 0.029735041 | 0.027480673 |
| ENSG00000198003 | 0.119625551 | 0.08055236  | 0.053935759 | 0.088113347 |
| ENSG00000100353 | 0.022038867 | 0.026602166 | 0.032237298 | 0.022923157 |
| ENSG00000185002 | 0.014901238 | 0.024971084 | 0.024689202 | 0.015536225 |
| ENSG00000254108 | 0.016365238 | 0.025443065 | 0.025075338 | 0.016295443 |
| ENSG00000182613 | 0.054419552 | 0.027691079 | 0.025602847 | 0.04638813  |
| ENSG00000137259 | 0.045621204 | 0.035041754 | 0.044541605 | 0.048622935 |
| ENSG00000106366 | 0.026764452 | 0.028851977 | 0.029392154 | 0.023749814 |
| ENSG00000072571 | 0.053330817 | 0.060169399 | 0.043346056 | 0.04121073  |
| ENSG00000198301 | 0.032551141 | 0.034560634 | 0.047438604 | 0.039941966 |
| ENSG00000254087 | 0.021411386 | 0.02832483  | 0.030119876 | 0.019584879 |
| ENSG00000120324 | 0.016134413 | 0.025329107 | 0.025370522 | 0.015327036 |
| ENSG00000183137 | 0.049027503 | 0.042642778 | 0.034723153 | 0.033185923 |
| ENSG00000090339 | 0.039257185 | 0.038962188 | 0.04176699  | 0.039774509 |
| ENSG00000139620 | 0.024421393 | 0.029628416 | 0.031868964 | 0.021114664 |
| ENSG00000102385 | 0.017998435 | 0.025500279 | 0.025155324 | 0.014907867 |
| ENSG00000105185 | 0.025036774 | 0.031143137 | 0.026663702 | 0.023579647 |
| ENSG00000160703 | 0.028802634 | 0.033196956 | 0.035598152 | 0.024474168 |
| ENSG00000130830 | 0.04965668  | 0.044475447 | 0.038860648 | 0.042513623 |
| ENSG00000145839 | 0.016950126 | 0.026379978 | 0.024707138 | 0.016389917 |
| ENSG00000214013 | 0.023064647 | 0.032333741 | 0.027920587 | 0.020068406 |
| ENSG00000171858 | 0.013763228 | 0.023945225 | 0.023975774 | 0.01527621  |
| ENSG00000134802 | 0.032652295 | 0.029525538 | 0.033330874 | 0.029563251 |
| ENSG00000197263 | 0.014993543 | 0.025556758 | 0.024849759 | 0.014296389 |
| ENSG00000130669 | 0.022590793 | 0.029817271 | 0.036790723 | 0.021280109 |
| ENSG00000184979 | 0.051829421 | 0.054355318 | 0.054435761 | 0.060298395 |
| ENSG00000185619 | 0.016137321 | 0.025537071 | 0.024947335 | 0.015121538 |
| ENSG00000183668 | 0.017657091 | 0.025861903 | 0.025828398 | 0.017543282 |
| ENSG00000157322 | 0.021607461 | 0.035264659 | 0.029781704 | 0.017169339 |
| ENSG00000189180 | 0.028799332 | 0.03137296  | 0.030003241 | 0.032567048 |
| ENSG00000165202 | 0.016963656 | 0.025952843 | 0.025629637 | 0.015835466 |
| ENSG00000133884 | 0.024340079 | 0.033785666 | 0.031814927 | 0.025788147 |
| ENSG00000184209 | 0.022651257 | 0.029938811 | 0.033487138 | 0.023654723 |
| ENSG00000168256 | 0.021919411 | 0.029618304 | 0.031696302 | 0.024100049 |
| ENSG00000167261 | 0.032737734 | 0.034985301 | 0.039351001 | 0.039277927 |
| ENSG00000125686 | 0.025747272 | 0.032200473 | 0.032659075 | 0.023835868 |
| ENSG00000138449 | 0.02755796  | 0.031058926 | 0.036200558 | 0.02182156  |
| ENSG00000196433 | 0.042626092 | 0.047342582 | 0.05038125  | 0.034119562 |
| ENSG00000135378 | 0.042450885 | 0.048096682 | 0.048898193 | 0.042420823 |
| ENSG00000198518 | 0.036139078 | 0.030681957 | 0.03717504  | 0.038184691 |
| ENSG00000131095 | 0.017571163 | 0.025262092 | 0.025251514 | 0.016669074 |



|                |             |             |             |             |
|----------------|-------------|-------------|-------------|-------------|
| ENSG0000069329 | 0.023157415 | 0.03225689  | 0.027442953 | 0.01866328  |
| ENSG0000130592 | 0.034979634 | 0.036120369 | 0.039862504 | 0.034408375 |
| ENSG0000171798 | 0.015704522 | 0.027848643 | 0.025373643 | 0.015520399 |
| ENSG0000122176 | 0.030761377 | 0.024754225 | 0.024814043 | 0.01422433  |
| ENSG0000136002 | 0.019627402 | 0.029115112 | 0.029978637 | 0.022699262 |
| ENSG0000104413 | 0.03223833  | 0.030737173 | 0.030605354 | 0.017569445 |
| ENSG0000089220 | 0.0243953   | 0.030727173 | 0.032431294 | 0.026840393 |
| ENSG0000142303 | 0.015481257 | 0.025246635 | 0.0253413   | 0.016100677 |
| ENSG0000131669 | 0.055944305 | 0.048455875 | 0.040557527 | 0.044266562 |
| ENSG0000006059 | 0.017602121 | 0.024906648 | 0.024963734 | 0.015675015 |
| ENSG0000196172 | 0.055677386 | 0.056142122 | 0.038237793 | 0.069396858 |
| ENSG0000168904 | 0.039043777 | 0.037173229 | 0.036474506 | 0.035916447 |
| ENSG0000134533 | 0.017203125 | 0.025186422 | 0.026627723 | 0.019509479 |
| ENSG0000113805 | 0.01693474  | 0.025385833 | 0.025080467 | 0.015789694 |
| ENSG0000178573 | 0.015722263 | 0.024961461 | 0.025417918 | 0.014636779 |
| ENSG0000205155 | 0.022376094 | 0.028270548 | 0.030466309 | 0.022176319 |
| ENSG0000197253 | 0.020805537 | 0.028546604 | 0.028427888 | 0.031104268 |
| ENSG0000138760 | 0.06559425  | 0.06533791  | 0.067233656 | 0.072084483 |
| ENSG0000174652 | 0.018458281 | 0.024786787 | 0.025017143 | 0.016509828 |
| ENSG0000133131 | 0.059504266 | 0.040651659 | 0.031258043 | 0.034415284 |
| ENSG0000147434 | 0.049136165 | 0.060258597 | 0.04494526  | 0.052423963 |
| ENSG0000103549 | 0.022886243 | 0.028661122 | 0.035872792 | 0.022750823 |
| ENSG0000185009 | 0.022987659 | 0.031259991 | 0.026648333 | 0.020632671 |
| ENSG0000145283 | 0.016194901 | 0.024575863 | 0.024923216 | 0.014850947 |
| ENSG0000163162 | 0.050440575 | 0.044381948 | 0.040321652 | 0.03901557  |
| ENSG0000172345 | 0.026468872 | 0.028956425 | 0.029549223 | 0.023042443 |
| ENSG0000159842 | 0.015962755 | 0.024473234 | 0.025469174 | 0.016953136 |
| ENSG0000167723 | 0.016661247 | 0.02499848  | 0.025236702 | 0.015387081 |
| ENSG0000111790 | 0.030683525 | 0.039453452 | 0.036755653 | 0.029607767 |
| ENSG0000148343 | 0.026056287 | 0.034867142 | 0.036923663 | 0.023068441 |
| ENSG0000144061 | 0.01534043  | 0.025340469 | 0.02469266  | 0.015717176 |
| ENSG0000180447 | 0.016727772 | 0.024849344 | 0.024760142 | 0.016910423 |
| ENSG0000197114 | 0.025571286 | 0.032358548 | 0.030993268 | 0.027440381 |
| ENSG0000166197 | 0.036636284 | 0.035625264 | 0.036692515 | 0.035804072 |
| ENSG0000177674 | 0.055444096 | 0.042689155 | 0.040097093 | 0.04252114  |
| ENSG0000164616 | 0.016230514 | 0.02413705  | 0.024960866 | 0.017309098 |
| ENSG0000149090 | 0.014833043 | 0.02638367  | 0.026322775 | 0.015541082 |
| ENSG0000229937 | 0.015626873 | 0.02457747  | 0.024922597 | 0.016089421 |
| ENSG0000117899 | 0.01674845  | 0.025221893 | 0.024795164 | 0.015744303 |
| ENSG0000196151 | 0.035067043 | 0.036165055 | 0.042978788 | 0.026388914 |
| ENSG0000144366 | 0.020298359 | 0.024454208 | 0.024245353 | 0.015236941 |
| ENSG0000166002 | 0.054763715 | 0.049808264 | 0.051468322 | 0.04508318  |
| ENSG0000157212 | 0.037793879 | 0.040847579 | 0.035460785 | 0.026717849 |
| ENSG0000103051 | 0.032424156 | 0.038521785 | 0.03750008  | 0.027696609 |
| ENSG0000106348 | 0.015585665 | 0.026139927 | 0.024179339 | 0.016206273 |
| ENSG0000138685 | 0.027225918 | 0.027720959 | 0.026183666 | 0.019920616 |
| ENSG0000104687 | 0.033524573 | 0.04335251  | 0.03497035  | 0.035776628 |
| ENSG0000075856 | 0.030901472 | 0.036178061 | 0.030001527 | 0.023319548 |
| ENSG0000174749 | 0.044438742 | 0.046493405 | 0.048181813 | 0.048222285 |
| ENSG0000109738 | 0.015429571 | 0.024705569 | 0.024675181 | 0.014802426 |
| ENSG0000105048 | 0.01595667  | 0.026822652 | 0.026772611 | 0.018650798 |
| ENSG0000155592 | 0.018766475 | 0.027632704 | 0.030101248 | 0.019668627 |
| ENSG0000122861 | 0.104476887 | 0.067931733 | 0.066248725 | 0.075555748 |
| ENSG0000102048 | 0.119356674 | 0.085845796 | 0.079123523 | 0.096975472 |

|                 |             |             |             |             |
|-----------------|-------------|-------------|-------------|-------------|
| ENSG00000186020 | 0.034301134 | 0.039336993 | 0.037506281 | 0.03028023  |
| ENSG00000108840 | 0.029851575 | 0.034555483 | 0.038458498 | 0.032325193 |
| ENSG00000110077 | 0.020777944 | 0.025346496 | 0.023965303 | 0.016058658 |
| ENSG00000178623 | 0.025648233 | 0.029968    | 0.032111427 | 0.020223656 |
| ENSG00000144857 | 0.015387653 | 0.024849726 | 0.024464899 | 0.015113797 |
| ENSG00000181240 | 0.01885048  | 0.025296928 | 0.025967081 | 0.017071472 |
| ENSG00000010244 | 0.030351269 | 0.03390502  | 0.03113526  | 0.031890576 |
| ENSG00000108061 | 0.02345461  | 0.033918663 | 0.034237439 | 0.023168781 |
| ENSG00000135632 | 0.019525444 | 0.02633918  | 0.029247338 | 0.020014333 |
| ENSG00000130810 | 0.02817599  | 0.028854147 | 0.031063586 | 0.026711581 |
| ENSG00000101280 | 0.019724177 | 0.030394538 | 0.028135827 | 0.019978132 |
| ENSG00000198399 | 0.014990375 | 0.0254028   | 0.025194285 | 0.015407367 |
| ENSG00000099622 | 0.029604128 | 0.034989318 | 0.032760935 | 0.030667857 |
| ENSG00000115137 | 0.026376304 | 0.031437213 | 0.029321132 | 0.02001194  |
| ENSG00000055609 | 0.026318948 | 0.032956131 | 0.033141395 | 0.035771661 |
| ENSG00000126088 | 0.032863806 | 0.03218924  | 0.029953015 | 0.028153108 |
| ENSG00000144659 | 0.026025578 | 0.032906379 | 0.03727139  | 0.025379769 |
| ENSG00000116032 | 0.017229646 | 0.024922097 | 0.024290371 | 0.014368485 |
| ENSG00000131203 | 0.015628622 | 0.025173942 | 0.025550919 | 0.020168712 |
| ENSG00000102225 | 0.014766128 | 0.024977211 | 0.024997986 | 0.014503033 |
| ENSG00000168135 | 0.015968106 | 0.025420679 | 0.025051804 | 0.015549379 |
| ENSG00000164818 | 0.031592448 | 0.035699744 | 0.033609868 | 0.031376864 |
| ENSG00000110046 | 0.024727586 | 0.029449128 | 0.034592225 | 0.025888691 |
| ENSG00000186910 | 0.026170396 | 0.026375184 | 0.025503379 | 0.032526137 |
| ENSG00000100304 | 0.040198946 | 0.03812073  | 0.041903499 | 0.03827492  |
| ENSG00000114573 | 0.030473359 | 0.031052473 | 0.029646395 | 0.025088948 |
| ENSG00000125508 | 0.01457017  | 0.024622505 | 0.024461809 | 0.015239187 |
| ENSG00000111215 | 0.039400929 | 0.050167943 | 0.042944176 | 0.036137399 |
| ENSG00000189108 | 0.01806901  | 0.025206425 | 0.025129855 | 0.01523309  |
| ENSG00000198648 | 0.035594034 | 0.026652449 | 0.026095112 | 0.028282033 |
| ENSG00000119772 | 0.030352587 | 0.037852228 | 0.039051432 | 0.031433072 |
| ENSG00000078902 | 0.02646919  | 0.030390571 | 0.029902903 | 0.021967965 |
| ENSG00000070831 | 0.055795659 | 0.037939983 | 0.037224967 | 0.048924081 |
| ENSG00000198835 | 0.018926316 | 0.025714636 | 0.02549259  | 0.015857306 |
| ENSG00000182446 | 0.030806886 | 0.048572376 | 0.044270199 | 0.038376886 |
| ENSG00000213066 | 0.052153369 | 0.046898455 | 0.049086948 | 0.0349725   |
| ENSG00000139364 | 0.021990418 | 0.025402345 | 0.025029092 | 0.015130638 |
| ENSG00000178125 | 0.015818575 | 0.025027163 | 0.024482107 | 0.014861731 |
| ENSG00000171388 | 0.01566368  | 0.026406757 | 0.025589892 | 0.014966474 |
| ENSG00000035928 | 0.033629003 | 0.036220448 | 0.032493188 | 0.025627835 |
| ENSG00000175877 | 0.015405636 | 0.025043586 | 0.024552941 | 0.015598233 |
| ENSG00000116455 | 0.038718107 | 0.035814046 | 0.036601286 | 0.037655545 |
| ENSG00000108094 | 0.025383347 | 0.033661638 | 0.031208171 | 0.020095016 |
| ENSG00000142166 | 0.020245465 | 0.032820559 | 0.029140303 | 0.021320874 |
| ENSG00000060971 | 0.028278185 | 0.035985095 | 0.030568633 | 0.028048809 |
| ENSG00000146410 | 0.044901099 | 0.035974283 | 0.040788328 | 0.041626817 |
| ENSG00000151475 | 0.01675114  | 0.025407473 | 0.028103461 | 0.016728837 |
| ENSG00000121454 | 0.015360272 | 0.025609315 | 0.025299196 | 0.014538337 |
| ENSG00000028839 | 0.021971149 | 0.029582569 | 0.03034478  | 0.023591815 |
| ENSG00000109572 | 0.035615197 | 0.041346455 | 0.032884886 | 0.026668443 |
| ENSG00000100083 | 0.031661593 | 0.035184228 | 0.040931394 | 0.03759485  |
| ENSG00000152270 | 0.023813423 | 0.03840165  | 0.032418259 | 0.024734298 |
| ENSG00000118526 | 0.015918468 | 0.026251137 | 0.025682632 | 0.015062897 |
| ENSG00000071967 | 0.065350074 | 0.07205642  | 0.063777894 | 0.061999551 |

|                 |             |             |             |             |
|-----------------|-------------|-------------|-------------|-------------|
| ENSG00000134780 | 0.018701867 | 0.024761394 | 0.025294324 | 0.015603582 |
| ENSG00000164406 | 0.014534704 | 0.025803207 | 0.025169825 | 0.015444847 |
| ENSG00000125337 | 0.016758491 | 0.025960212 | 0.025714242 | 0.0163486   |
| ENSG00000161267 | 0.016453169 | 0.025005201 | 0.024978447 | 0.014720004 |
| ENSG00000005175 | 0.032324468 | 0.037924962 | 0.030875786 | 0.027209377 |
| ENSG00000197487 | 0.01469022  | 0.024085967 | 0.024558273 | 0.016385617 |
| ENSG00000113231 | 0.017087482 | 0.025085241 | 0.02463931  | 0.01576902  |
| ENSG00000160200 | 0.026946326 | 0.035334024 | 0.030522656 | 0.022706388 |
| ENSG00000105819 | 0.023898191 | 0.033250173 | 0.029758551 | 0.020771405 |
| ENSG00000167414 | 0.099924567 | 0.073935307 | 0.066100034 | 0.082286801 |
| ENSG00000141738 | 0.015059559 | 0.025262093 | 0.024567733 | 0.015903337 |
| ENSG00000165119 | 0.02239854  | 0.027246908 | 0.026997874 | 0.030065803 |
| ENSG00000188408 | 0.015435497 | 0.024380695 | 0.024474561 | 0.015127492 |
| ENSG00000147059 | 0.015196381 | 0.024421466 | 0.025590027 | 0.015440465 |
| ENSG00000105963 | 0.062278052 | 0.043033986 | 0.047992536 | 0.04633033  |
| ENSG00000167548 | 0.017241585 | 0.026073808 | 0.024313129 | 0.019022257 |
| ENSG00000166908 | 0.027270552 | 0.038618585 | 0.041459869 | 0.027811482 |
| ENSG00000094755 | 0.016765118 | 0.024789772 | 0.024032485 | 0.015078095 |
| ENSG00000177885 | 0.023629162 | 0.03068036  | 0.033289133 | 0.021675554 |
| ENSG00000162430 | 0.136099086 | 0.120416555 | 0.124079807 | 0.117964164 |
| ENSG00000177324 | 0.015867332 | 0.025238451 | 0.024936864 | 0.014493661 |
| ENSG00000186417 | 0.014813036 | 0.024712817 | 0.024206438 | 0.014465331 |
| ENSG00000154734 | 0.015937749 | 0.024792283 | 0.024821479 | 0.015556286 |
| ENSG00000172789 | 0.034505606 | 0.027449719 | 0.026042631 | 0.019989164 |
| ENSG00000071073 | 0.073808558 | 0.053652382 | 0.046572432 | 0.056118373 |
| ENSG00000153827 | 0.020802877 | 0.032237947 | 0.028540856 | 0.019653224 |
| ENSG00000173080 | 0.015273406 | 0.02403179  | 0.024802633 | 0.014825232 |
| ENSG00000149716 | 0.017646964 | 0.026747442 | 0.026877663 | 0.017944197 |
| ENSG00000151379 | 0.018676803 | 0.026066017 | 0.025041668 | 0.019405548 |
| ENSG00000177192 | 0.036506428 | 0.035747976 | 0.036719219 | 0.03630128  |
| ENSG00000167615 | 0.016025332 | 0.026593318 | 0.025345212 | 0.0187809   |
| ENSG00000174326 | 0.022219468 | 0.041504637 | 0.032705893 | 0.024944368 |
| ENSG00000132554 | 0.034485526 | 0.030642219 | 0.026639421 | 0.027646383 |
| ENSG00000100243 | 0.01663541  | 0.025650968 | 0.025586464 | 0.014651573 |
| ENSG00000197872 | 0.076061847 | 0.059271727 | 0.039802424 | 0.07818037  |
| ENSG00000137460 | 0.015582105 | 0.024700288 | 0.025211945 | 0.015777775 |
| ENSG00000206288 | 0.016304005 | 0.025039719 | 0.026443174 | 0.015822835 |
| ENSG00000060982 | 0.061047672 | 0.076374925 | 0.074574265 | 0.06772247  |
| ENSG00000122643 | 0.032937732 | 0.037545356 | 0.033336572 | 0.024230125 |
| ENSG00000107833 | 0.033953848 | 0.031566909 | 0.031835452 | 0.027100488 |
| ENSG00000151502 | 0.029699604 | 0.032099163 | 0.032309435 | 0.02975383  |
| ENSG00000112984 | 0.04819516  | 0.037694385 | 0.036241062 | 0.037550565 |
| ENSG00000162104 | 0.023298379 | 0.029453171 | 0.028990461 | 0.039829413 |
| ENSG00000179270 | 0.015721702 | 0.024772867 | 0.025179497 | 0.014369326 |
| ENSG00000204428 | 0.021277438 | 0.026848934 | 0.026024989 | 0.019164679 |
| ENSG00000162761 | 0.015204197 | 0.025273446 | 0.025530394 | 0.015935158 |
| ENSG00000135722 | 0.026409224 | 0.03338622  | 0.028714721 | 0.027398628 |
| ENSG00000120337 | 0.016569973 | 0.025433389 | 0.025304096 | 0.014818839 |
| ENSG00000168672 | 0.016501378 | 0.024990483 | 0.025218291 | 0.015834029 |
| ENSG00000103569 | 0.080073891 | 0.059852812 | 0.041357861 | 0.053730831 |
| ENSG00000064989 | 0.049250423 | 0.029947344 | 0.032134057 | 0.024037849 |
| ENSG00000180370 | 0.03742094  | 0.043045514 | 0.030857819 | 0.032816416 |
| ENSG00000205143 | 0.022924473 | 0.028454057 | 0.03170863  | 0.024146732 |
| ENSG00000052344 | 0.017002173 | 0.024919491 | 0.026061942 | 0.014825575 |

|                 |             |             |             |             |
|-----------------|-------------|-------------|-------------|-------------|
| ENSG00000122481 | 0.032479423 | 0.041594584 | 0.032931636 | 0.031004051 |
| ENSG00000105711 | 0.019115447 | 0.03113448  | 0.029912232 | 0.021639331 |
| ENSG00000184557 | 0.0168583   | 0.025784889 | 0.025740611 | 0.015269594 |
| ENSG00000120370 | 0.033322991 | 0.036340721 | 0.036655804 | 0.031195773 |
| ENSG00000166454 | 0.032447801 | 0.038626605 | 0.039649652 | 0.031734561 |
| ENSG00000118804 | 0.025812569 | 0.027250133 | 0.028119165 | 0.019662562 |
| ENSG00000145996 | 0.015123245 | 0.024929236 | 0.024388234 | 0.014995271 |
| ENSG00000143486 | 0.026052769 | 0.034009983 | 0.03160962  | 0.02402315  |
| ENSG00000100346 | 0.018079074 | 0.02585074  | 0.026052148 | 0.018387144 |
| ENSG00000100612 | 0.031311896 | 0.03028759  | 0.030815605 | 0.025955435 |
| ENSG00000162384 | 0.031128715 | 0.033852736 | 0.03233742  | 0.021755765 |
| ENSG0000004700  | 0.035564166 | 0.038619828 | 0.031553951 | 0.027741081 |
| ENSG00000083290 | 0.046834885 | 0.049017539 | 0.03823088  | 0.0354187   |
| ENSG00000203759 | 0.038166881 | 0.036704193 | 0.032081634 | 0.030109002 |
| ENSG00000133805 | 0.046282458 | 0.048046041 | 0.051597698 | 0.044141222 |
| ENSG00000111850 | 0.035696253 | 0.038212576 | 0.029853126 | 0.026375882 |
| ENSG00000138764 | 0.05534088  | 0.067973973 | 0.065403269 | 0.060359883 |
| ENSG00000171206 | 0.027491716 | 0.033833673 | 0.03454238  | 0.028110122 |
| ENSG00000096092 | 0.041042873 | 0.04769489  | 0.038923961 | 0.028013332 |
| ENSG00000168028 | 0.015649431 | 0.024329668 | 0.024163063 | 0.014924088 |
| ENSG00000162910 | 0.024526104 | 0.027456697 | 0.029547929 | 0.020405645 |
| ENSG00000153498 | 0.021266494 | 0.026897349 | 0.025281021 | 0.016325743 |
| ENSG00000075618 | 0.043702606 | 0.047356334 | 0.050667295 | 0.051139309 |
| ENSG00000143167 | 0.018148534 | 0.026352522 | 0.026969695 | 0.016885437 |
| ENSG00000100519 | 0.024626034 | 0.03191352  | 0.027529442 | 0.023370069 |
| ENSG00000119969 | 0.036098392 | 0.042150423 | 0.032051695 | 0.034782296 |
| ENSG00000117215 | 0.017508929 | 0.0251873   | 0.026281822 | 0.014855879 |
| ENSG00000177706 | 0.01805113  | 0.02545287  | 0.024862669 | 0.016225845 |
| ENSG00000187210 | 0.097530098 | 0.063086032 | 0.07031565  | 0.073569944 |
| ENSG00000171219 | 0.016916141 | 0.025477922 | 0.027388289 | 0.016309577 |
| ENSG00000186047 | 0.016042886 | 0.02556252  | 0.025435388 | 0.016339877 |
| ENSG00000215217 | 0.015151895 | 0.024558916 | 0.024976073 | 0.014598448 |
| ENSG00000181072 | 0.015006806 | 0.024601054 | 0.024700103 | 0.014788655 |
| ENSG00000175105 | 0.018981325 | 0.028864231 | 0.027682823 | 0.019870657 |
| ENSG00000185942 | 0.017871226 | 0.025024488 | 0.025526341 | 0.015307979 |
| ENSG00000133114 | 0.041079097 | 0.050850177 | 0.038622559 | 0.055180161 |
| ENSG00000143194 | 0.033663257 | 0.031007274 | 0.026594495 | 0.023279445 |
| ENSG00000156802 | 0.043624942 | 0.042154243 | 0.03380203  | 0.028867432 |
| ENSG0000004478  | 0.045494885 | 0.042590398 | 0.039912357 | 0.033661537 |
| ENSG00000137843 | 0.02397883  | 0.02752525  | 0.027682317 | 0.019318995 |
| ENSG00000143452 | 0.017409422 | 0.025526717 | 0.026353944 | 0.016845109 |
| ENSG00000030582 | 0.028764193 | 0.033346201 | 0.030345415 | 0.034170485 |
| ENSG00000121933 | 0.024609256 | 0.028931474 | 0.027790006 | 0.018964374 |
| ENSG00000152977 | 0.017616705 | 0.024871137 | 0.025956335 | 0.016005379 |
| ENSG00000197376 | 0.017351973 | 0.024802392 | 0.024615378 | 0.015091277 |
| ENSG00000241945 | 0.027794435 | 0.033002811 | 0.033568828 | 0.025338561 |
| ENSG00000126861 | 0.017324051 | 0.024712592 | 0.024509642 | 0.01606966  |
| ENSG00000197555 | 0.023963323 | 0.033749261 | 0.032778758 | 0.023380084 |
| ENSG00000240251 | 0.02502964  | 0.029047417 | 0.029830952 | 0.018996739 |
| ENSG00000144935 | 0.053840901 | 0.049643304 | 0.032442098 | 0.045242936 |
| ENSG00000168938 | 0.074941043 | 0.071325651 | 0.053022069 | 0.081464422 |
| ENSG00000115234 | 0.025693351 | 0.029500416 | 0.029890327 | 0.02175705  |
| ENSG00000145016 | 0.030909158 | 0.034325338 | 0.035248352 | 0.028285812 |
| ENSG00000159167 | 0.019856427 | 0.02549752  | 0.027399452 | 0.019483737 |

|                 |             |             |             |             |
|-----------------|-------------|-------------|-------------|-------------|
| ENSG00000135299 | 0.058857845 | 0.041072969 | 0.0451222   | 0.044660479 |
| ENSG00000011243 | 0.023868874 | 0.032428459 | 0.039159191 | 0.021785072 |
| ENSG00000129534 | 0.040012784 | 0.039848579 | 0.033860923 | 0.034485397 |
| ENSG00000090615 | 0.026321029 | 0.033941896 | 0.036177066 | 0.028893184 |
| ENSG00000164611 | 0.033402167 | 0.032082428 | 0.030645141 | 0.024423439 |
| ENSG00000173404 | 0.019942454 | 0.026467523 | 0.025703655 | 0.017617141 |
| ENSG00000173585 | 0.016047863 | 0.02640138  | 0.024772083 | 0.016835813 |
| ENSG00000137478 | 0.027963422 | 0.034419876 | 0.030356427 | 0.023324971 |
| ENSG00000145220 | 0.036258896 | 0.030864564 | 0.034953685 | 0.036659943 |
| ENSG00000132196 | 0.029363784 | 0.030872786 | 0.032693186 | 0.02920945  |
| ENSG00000155096 | 0.032139338 | 0.039696997 | 0.037250239 | 0.02854971  |
| ENSG00000116771 | 0.041183478 | 0.037762001 | 0.033880302 | 0.033950271 |
| ENSG00000161281 | 0.016672572 | 0.024698418 | 0.026623006 | 0.023256345 |
| ENSG00000106609 | 0.024014653 | 0.034106483 | 0.034319223 | 0.01959161  |
| ENSG00000178950 | 0.032903083 | 0.035168416 | 0.032025052 | 0.028219349 |
| ENSG00000173566 | 0.054221178 | 0.045512852 | 0.037471032 | 0.040547014 |
| ENSG00000101098 | 0.017913193 | 0.02583941  | 0.025534406 | 0.017033542 |
| ENSG00000186187 | 0.015723909 | 0.025101288 | 0.025027508 | 0.014946615 |
| ENSG00000089199 | 0.017212808 | 0.025146062 | 0.024928807 | 0.016137901 |
| ENSG00000163558 | 0.042404476 | 0.040486711 | 0.037546631 | 0.031944562 |
| ENSG00000166016 | 0.061398014 | 0.060234013 | 0.064186445 | 0.062285049 |
| ENSG00000129467 | 0.035940346 | 0.034496426 | 0.031262686 | 0.02923366  |
| ENSG00000185751 | 0.018146672 | 0.027229512 | 0.025912162 | 0.015985408 |
| ENSG00000139433 | 0.03178065  | 0.03650575  | 0.034528436 | 0.024853865 |
| ENSG00000189350 | 0.015198011 | 0.024751119 | 0.02526279  | 0.015495058 |
| ENSG00000147044 | 0.065494723 | 0.049872623 | 0.040990644 | 0.043576437 |
| ENSG00000139344 | 0.019432144 | 0.026330998 | 0.025684892 | 0.017953538 |
| ENSG00000242366 | 0.022590896 | 0.029280466 | 0.025208622 | 0.025093841 |
| ENSG00000116191 | 0.057951038 | 0.053478832 | 0.057432204 | 0.052572184 |
| ENSG00000075218 | 0.025899323 | 0.028098553 | 0.025722265 | 0.02084557  |
| ENSG00000092330 | 0.040100146 | 0.035932953 | 0.038236165 | 0.026673028 |
| ENSG00000133639 | 0.019753094 | 0.028270057 | 0.027380235 | 0.020112227 |
| ENSG00000176049 | 0.01655992  | 0.025615053 | 0.024754366 | 0.015215236 |
| ENSG00000123505 | 0.027551584 | 0.034238952 | 0.034182384 | 0.03130187  |
| ENSG00000179300 | 0.022513217 | 0.030481927 | 0.027909097 | 0.018566547 |
| ENSG00000048544 | 0.032437245 | 0.036673466 | 0.037776891 | 0.038190908 |
| ENSG00000177542 | 0.026094742 | 0.033517865 | 0.038816438 | 0.027956278 |
| ENSG00000212734 | 0.026453853 | 0.03360947  | 0.03549893  | 0.026402636 |
| ENSG00000198040 | 0.02983576  | 0.034844113 | 0.031847075 | 0.024744118 |
| ENSG00000109846 | 0.026291324 | 0.032366266 | 0.031314395 | 0.035161815 |
| ENSG00000183918 | 0.086365889 | 0.099001301 | 0.10857905  | 0.086519914 |
| ENSG00000008324 | 0.019152175 | 0.028528234 | 0.031205809 | 0.018497661 |
| ENSG00000091428 | 0.016336574 | 0.024932399 | 0.025287084 | 0.015143165 |
| ENSG00000173638 | 0.037044258 | 0.03172482  | 0.03544475  | 0.033568864 |
| ENSG00000105216 | 0.025358632 | 0.030542221 | 0.029541895 | 0.021264864 |
| ENSG00000143443 | 0.023688676 | 0.02716173  | 0.029627856 | 0.021217222 |
| ENSG00000160293 | 0.020558565 | 0.030068697 | 0.02561175  | 0.021924826 |
| ENSG00000181666 | 0.043797808 | 0.039415092 | 0.037270587 | 0.03614952  |
| ENSG00000125818 | 0.014923398 | 0.02451506  | 0.024932232 | 0.015201994 |
| ENSG00000173715 | 0.057041252 | 0.050712104 | 0.047265737 | 0.039914877 |
| ENSG00000088876 | 0.027535949 | 0.02909489  | 0.029572427 | 0.019450746 |
| ENSG00000004534 | 0.030176719 | 0.035186851 | 0.031306067 | 0.023369877 |
| ENSG00000133110 | 0.015854402 | 0.024397103 | 0.024405563 | 0.015595799 |
| ENSG00000169762 | 0.034930777 | 0.038673076 | 0.035968788 | 0.031459549 |

|                 |             |             |             |             |
|-----------------|-------------|-------------|-------------|-------------|
| ENSG00000108417 | 0.016163605 | 0.024899194 | 0.024396571 | 0.015364782 |
| ENSG00000158636 | 0.031577108 | 0.033116617 | 0.031716449 | 0.027361906 |
| ENSG00000169418 | 0.047322768 | 0.053566436 | 0.053547183 | 0.050659193 |
| ENSG00000143499 | 0.038581806 | 0.041242807 | 0.034289174 | 0.033003066 |
| ENSG00000124785 | 0.12701717  | 0.126537087 | 0.09133679  | 0.135792354 |
| ENSG00000106803 | 0.023663408 | 0.028945715 | 0.031804281 | 0.026428316 |
| ENSG00000177595 | 0.050811118 | 0.050523448 | 0.037801133 | 0.037069105 |
| ENSG00000149150 | 0.041303309 | 0.036219341 | 0.036277101 | 0.029772773 |
| ENSG00000149573 | 0.021779039 | 0.026321135 | 0.025209741 | 0.019668459 |
| ENSG00000099139 | 0.016288644 | 0.025826596 | 0.025611375 | 0.015370519 |
| ENSG00000088298 | 0.03201069  | 0.032602578 | 0.034880652 | 0.030517358 |
| ENSG00000145214 | 0.016694084 | 0.024836482 | 0.024762082 | 0.016097307 |
| ENSG00000117480 | 0.033253903 | 0.030031171 | 0.026888246 | 0.021983896 |
| ENSG00000119686 | 0.058775714 | 0.054028307 | 0.049189306 | 0.051694988 |
| ENSG00000071794 | 0.042915752 | 0.039167239 | 0.034339012 | 0.029542709 |
| ENSG00000140506 | 0.015422967 | 0.025151982 | 0.025104479 | 0.01524318  |
| ENSG00000176979 | 0.016272864 | 0.025427281 | 0.025017958 | 0.015689634 |
| ENSG00000102575 | 0.081083899 | 0.054290149 | 0.045248174 | 0.052163411 |
| ENSG00000122507 | 0.021079838 | 0.026425768 | 0.028382881 | 0.021237207 |
| ENSG00000186334 | 0.016523233 | 0.026138814 | 0.025694439 | 0.015583767 |
| ENSG00000154781 | 0.02281052  | 0.032582216 | 0.032671131 | 0.02491835  |
| ENSG00000148671 | 0.081235995 | 0.065384515 | 0.060510245 | 0.074777964 |
| ENSG00000171121 | 0.015892906 | 0.025618103 | 0.025449753 | 0.014644318 |
| ENSG00000137860 | 0.015629798 | 0.024718931 | 0.024788831 | 0.014781338 |
| ENSG00000168702 | 0.01637809  | 0.024892964 | 0.025250851 | 0.016643596 |
| ENSG00000147454 | 0.041621678 | 0.03725004  | 0.03750013  | 0.039708502 |
| ENSG00000205726 | 0.016329548 | 0.024226492 | 0.024824972 | 0.01614814  |
| ENSG00000179761 | 0.06126441  | 0.050587549 | 0.046134483 | 0.061412252 |
| ENSG00000134138 | 0.016354822 | 0.025291067 | 0.024504857 | 0.015912047 |
| ENSG00000153790 | 0.020415048 | 0.027425178 | 0.025937812 | 0.020529445 |
| ENSG00000070731 | 0.028019355 | 0.026886614 | 0.026756911 | 0.030877266 |
| ENSG00000135334 | 0.024877338 | 0.033438413 | 0.032144413 | 0.021634288 |
| ENSG00000184226 | 0.01560583  | 0.024482607 | 0.025638989 | 0.016372144 |
| ENSG00000127334 | 0.018761138 | 0.029435426 | 0.029616094 | 0.019474231 |
| ENSG00000181418 | 0.038558235 | 0.034454688 | 0.039182877 | 0.031620428 |
| ENSG00000146966 | 0.015679412 | 0.024501038 | 0.024260662 | 0.014365723 |
| ENSG00000243480 | 0.031512257 | 0.038345516 | 0.031062851 | 0.031139877 |
| ENSG00000104859 | 0.020832757 | 0.032933855 | 0.038333941 | 0.027655979 |
| ENSG00000113013 | 0.024540242 | 0.029353102 | 0.027664928 | 0.019273865 |
| ENSG00000119913 | 0.015632722 | 0.024582312 | 0.024648948 | 0.015137887 |
| ENSG00000059377 | 0.078469623 | 0.070331467 | 0.06464926  | 0.066409284 |
| ENSG00000168306 | 0.015897628 | 0.024888665 | 0.024719649 | 0.015098854 |
| ENSG00000087301 | 0.016437885 | 0.024664628 | 0.026283334 | 0.014873764 |
| ENSG00000105968 | 0.027619266 | 0.029633993 | 0.029367118 | 0.021278323 |
| ENSG00000239389 | 0.016169729 | 0.024497432 | 0.024639202 | 0.016020921 |
| ENSG00000179241 | 0.032736284 | 0.026228555 | 0.024459136 | 0.017810036 |
| ENSG00000203910 | 0.016500078 | 0.024789559 | 0.02496124  | 0.016265968 |
| ENSG00000120837 | 0.039007313 | 0.0445748   | 0.036362659 | 0.028372843 |
| ENSG00000170836 | 0.035167575 | 0.038014141 | 0.036007188 | 0.025394846 |
| ENSG00000169484 | 0.017622693 | 0.026339925 | 0.025183597 | 0.016247219 |
| ENSG00000178694 | 0.023096144 | 0.030177263 | 0.028080709 | 0.020294226 |
| ENSG00000112462 | 0.015283563 | 0.024204832 | 0.02490725  | 0.015475393 |
| ENSG00000148814 | 0.033763076 | 0.036888179 | 0.036285515 | 0.026620624 |
| ENSG00000104356 | 0.039416774 | 0.048264796 | 0.036976545 | 0.040111752 |

|                 |             |             |             |             |
|-----------------|-------------|-------------|-------------|-------------|
| ENSG00000186860 | 0.114847272 | 0.077420239 | 0.042920148 | 0.09067478  |
| ENSG00000203730 | 0.015261525 | 0.025512715 | 0.024519929 | 0.015096861 |
| ENSG00000047410 | 0.021736713 | 0.031816807 | 0.02942829  | 0.019520844 |
| ENSG00000124422 | 0.028334751 | 0.027998578 | 0.03406073  | 0.027685206 |
| ENSG00000237763 | 0.026554403 | 0.033107972 | 0.029756907 | 0.023461327 |
| ENSG00000184544 | 0.015952205 | 0.026230731 | 0.025243363 | 0.01486154  |
| ENSG00000151655 | 0.015598523 | 0.024810097 | 0.025072472 | 0.014780234 |
| ENSG0000008056  | 0.01517368  | 0.025245655 | 0.02543726  | 0.01449779  |
| ENSG00000137709 | 0.027639313 | 0.05646628  | 0.038710371 | 0.031684593 |
| ENSG00000102452 | 0.015179709 | 0.026097063 | 0.025314753 | 0.016725635 |
| ENSG00000165323 | 0.016775585 | 0.025639304 | 0.025078037 | 0.016259614 |
| ENSG00000100601 | 0.027657207 | 0.033755784 | 0.034074741 | 0.025159851 |
| ENSG00000140848 | 0.045767788 | 0.049031837 | 0.039873729 | 0.049804776 |
| ENSG00000102781 | 0.040923857 | 0.047025693 | 0.036141574 | 0.040019854 |
| ENSG00000169884 | 0.017412569 | 0.025863623 | 0.024571448 | 0.017555206 |
| ENSG00000254218 | 0.018416229 | 0.024489027 | 0.024824193 | 0.01644483  |
| ENSG00000147050 | 0.048341915 | 0.049795392 | 0.053754503 | 0.038672889 |
| ENSG00000143847 | 0.028835482 | 0.031542333 | 0.030520713 | 0.030779847 |
| ENSG00000170801 | 0.035462184 | 0.029604342 | 0.032981617 | 0.027219573 |
| ENSG00000152193 | 0.02927439  | 0.036859123 | 0.037639997 | 0.029048356 |
| ENSG00000130803 | 0.025114333 | 0.034927145 | 0.040274535 | 0.025309096 |
| ENSG00000166173 | 0.106661436 | 0.062713234 | 0.035007445 | 0.05952565  |
| ENSG00000178498 | 0.032238062 | 0.036391531 | 0.040274146 | 0.032488497 |
| ENSG00000076382 | 0.033159099 | 0.032020726 | 0.030371922 | 0.022015048 |
| ENSG00000076984 | 0.01926279  | 0.030874405 | 0.028617986 | 0.022824394 |
| ENSG00000204920 | 0.046714585 | 0.039837769 | 0.04022534  | 0.027130402 |
| ENSG00000144962 | 0.017922272 | 0.028395553 | 0.024850395 | 0.018903632 |
| ENSG00000151353 | 0.040996826 | 0.047658263 | 0.035859779 | 0.032032416 |
| ENSG00000136478 | 0.041721091 | 0.041028309 | 0.037229377 | 0.030864688 |
| ENSG00000182103 | 0.016052556 | 0.025494129 | 0.025380048 | 0.014782518 |
| ENSG00000135525 | 0.019217042 | 0.025049444 | 0.025689864 | 0.018162789 |
| ENSG00000130305 | 0.026267174 | 0.032079003 | 0.029969802 | 0.025367596 |
| ENSG00000054967 | 0.015255673 | 0.024970233 | 0.026006475 | 0.01492502  |
| ENSG00000166794 | 0.033059406 | 0.031844057 | 0.036838419 | 0.036716431 |
| ENSG00000183908 | 0.017376136 | 0.027016557 | 0.025094939 | 0.018054343 |
| ENSG00000087269 | 0.026359615 | 0.029481252 | 0.029741774 | 0.024809907 |
| ENSG00000150048 | 0.016227465 | 0.024802037 | 0.024034932 | 0.015478622 |
| ENSG00000141349 | 0.033554103 | 0.029331829 | 0.029006471 | 0.030989903 |
| ENSG00000156671 | 0.015287759 | 0.025673091 | 0.024291252 | 0.014721556 |
| ENSG00000130202 | 0.016417254 | 0.025531403 | 0.024754282 | 0.015108119 |
| ENSG00000131242 | 0.045392156 | 0.041506146 | 0.035370658 | 0.03944555  |
| ENSG00000153575 | 0.037704463 | 0.035898142 | 0.038137315 | 0.046131125 |
| ENSG00000145723 | 0.0395526   | 0.041644495 | 0.033169565 | 0.026489433 |
| ENSG00000153406 | 0.034669228 | 0.032466189 | 0.030786139 | 0.038962617 |
| ENSG00000136485 | 0.029209086 | 0.032400974 | 0.040849245 | 0.025677883 |
| ENSG00000177106 | 0.059470514 | 0.05872893  | 0.045988315 | 0.051585864 |
| ENSG00000078140 | 0.026621032 | 0.034310443 | 0.029764379 | 0.0267726   |
| ENSG00000241343 | 0.015338522 | 0.024160869 | 0.023903728 | 0.018547865 |
| ENSG00000179833 | 0.033956144 | 0.036986541 | 0.036928368 | 0.032592545 |
| ENSG00000117280 | 0.055102721 | 0.041705202 | 0.038985281 | 0.042695398 |
| ENSG00000099385 | 0.028096945 | 0.034786365 | 0.030196364 | 0.030619329 |
| ENSG00000104375 | 0.055468912 | 0.053700163 | 0.045304259 | 0.052207663 |
| ENSG00000167772 | 0.014668827 | 0.025090892 | 0.025414864 | 0.015232487 |
| ENSG0000000938  | 0.077558017 | 0.059044042 | 0.048682091 | 0.065532833 |

|                 |             |             |             |             |
|-----------------|-------------|-------------|-------------|-------------|
| ENSG00000178033 | 0.016371143 | 0.025788661 | 0.026326443 | 0.015983542 |
| ENSG00000225921 | 0.026377906 | 0.029319977 | 0.029891379 | 0.022722631 |
| ENSG00000125861 | 0.016455993 | 0.025168181 | 0.026573353 | 0.014970586 |
| ENSG00000172081 | 0.024829372 | 0.031627239 | 0.030275291 | 0.027516683 |
| ENSG00000153037 | 0.026016953 | 0.03471891  | 0.038601231 | 0.029589987 |
| ENSG00000100241 | 0.032993403 | 0.036932582 | 0.036478266 | 0.026711187 |
| ENSG00000154262 | 0.050740742 | 0.048288154 | 0.035846088 | 0.042192263 |
| ENSG00000033122 | 0.015145608 | 0.025141981 | 0.024894071 | 0.015536891 |
| ENSG00000134072 | 0.049048374 | 0.046861916 | 0.035486979 | 0.042251516 |
| ENSG00000198598 | 0.083357765 | 0.084242656 | 0.083323598 | 0.086732814 |
| ENSG00000166136 | 0.022504957 | 0.028561473 | 0.027653428 | 0.019756918 |
| ENSG00000111291 | 0.038821679 | 0.031094831 | 0.032467524 | 0.02344288  |
| ENSG00000100100 | 0.058463079 | 0.053853207 | 0.054989422 | 0.061871487 |
| ENSG00000080007 | 0.096864966 | 0.077489304 | 0.084133159 | 0.079774256 |
| ENSG00000170577 | 0.019481982 | 0.0269483   | 0.028464833 | 0.017859725 |
| ENSG00000103266 | 0.024411538 | 0.026700088 | 0.028965374 | 0.020175471 |
| ENSG00000181518 | 0.015980513 | 0.025492251 | 0.025630049 | 0.014623132 |
| ENSG00000204351 | 0.030472684 | 0.033870639 | 0.031579083 | 0.023067012 |
| ENSG00000187243 | 0.029246974 | 0.024590123 | 0.02574703  | 0.017265165 |
| ENSG00000135744 | 0.016862175 | 0.025324445 | 0.025825859 | 0.015929664 |
| ENSG00000137077 | 0.015451213 | 0.024759819 | 0.025318843 | 0.014940644 |
| ENSG00000104921 | 0.042114134 | 0.049173913 | 0.050382693 | 0.062063951 |
| ENSG00000115211 | 0.015750645 | 0.024675565 | 0.024359268 | 0.016832355 |
| ENSG00000133872 | 0.025185437 | 0.029826713 | 0.031771153 | 0.019891106 |
| ENSG00000173250 | 0.016294926 | 0.024811361 | 0.02519823  | 0.016787756 |
| ENSG00000156234 | 0.051786151 | 0.049887669 | 0.050536087 | 0.038578562 |
| ENSG00000125848 | 0.01949977  | 0.025651377 | 0.025411493 | 0.01622811  |
| ENSG00000166260 | 0.043088464 | 0.046031154 | 0.034227659 | 0.034744112 |
| ENSG00000183260 | 0.017065084 | 0.026009054 | 0.024966146 | 0.01642668  |
| ENSG00000112137 | 0.056747397 | 0.062616064 | 0.052072891 | 0.07236883  |
| ENSG00000093000 | 0.015533298 | 0.024418391 | 0.02486549  | 0.014032699 |
| ENSG00000137185 | 0.026225162 | 0.034051067 | 0.031679208 | 0.025247276 |
| ENSG00000170255 | 0.014632132 | 0.025248348 | 0.025764009 | 0.01591843  |
| ENSG00000168477 | 0.01648748  | 0.024580771 | 0.024209251 | 0.014842013 |
| ENSG00000164989 | 0.025918195 | 0.029206617 | 0.030011956 | 0.025233531 |
| ENSG00000173451 | 0.031919214 | 0.045358386 | 0.042180406 | 0.029232005 |
| ENSG00000105443 | 0.02456214  | 0.029329234 | 0.033329283 | 0.02772691  |
| ENSG00000173456 | 0.032400438 | 0.029978126 | 0.03747505  | 0.027882977 |
| ENSG00000172780 | 0.024695668 | 0.030610371 | 0.032855074 | 0.024044116 |
| ENSG00000147885 | 0.016671539 | 0.027070474 | 0.025282022 | 0.017271833 |
| ENSG00000112335 | 0.027291466 | 0.030711933 | 0.027301817 | 0.021956738 |
| ENSG00000149782 | 0.023264108 | 0.030491621 | 0.029613285 | 0.024024116 |
| ENSG00000178172 | 0.017538501 | 0.026549137 | 0.026220702 | 0.017742206 |
| ENSG00000254122 | 0.018529062 | 0.025876022 | 0.027119412 | 0.016653067 |
| ENSG00000131931 | 0.029783644 | 0.035134139 | 0.034623012 | 0.02925933  |
| ENSG00000229809 | 0.022865238 | 0.027469127 | 0.029756469 | 0.023441395 |
| ENSG00000186340 | 0.016395269 | 0.02554968  | 0.025346336 | 0.014179527 |
| ENSG00000116745 | 0.016340246 | 0.025080244 | 0.02590134  | 0.016256823 |
| ENSG00000174607 | 0.032159968 | 0.039223194 | 0.029106674 | 0.038204656 |
| ENSG00000100299 | 0.038184925 | 0.038389696 | 0.03605128  | 0.033772137 |
| ENSG00000174173 | 0.032934868 | 0.039654136 | 0.044743555 | 0.032942657 |
| ENSG00000185298 | 0.027912966 | 0.034124082 | 0.038336214 | 0.029122283 |
| ENSG00000104537 | 0.017196079 | 0.025518014 | 0.024955685 | 0.016609697 |
| ENSG00000163754 | 0.0380115   | 0.039820982 | 0.036393338 | 0.033400113 |



|                 |             |             |             |             |
|-----------------|-------------|-------------|-------------|-------------|
| ENSG00000188580 | 0.039578259 | 0.026526952 | 0.025865393 | 0.016537036 |
| ENSG00000183087 | 0.048877072 | 0.051793045 | 0.048997219 | 0.049158154 |
| ENSG00000111325 | 0.025373995 | 0.030385154 | 0.032363742 | 0.027751911 |
| ENSG00000099326 | 0.034374885 | 0.037899123 | 0.035413868 | 0.029414961 |
| ENSG00000131126 | 0.016904341 | 0.026599458 | 0.026019081 | 0.016227149 |
| ENSG00000181873 | 0.03328481  | 0.032663113 | 0.038614206 | 0.034220047 |
| ENSG00000080845 | 0.016820167 | 0.02552189  | 0.025227227 | 0.014940883 |
| ENSG00000166323 | 0.027414227 | 0.029680202 | 0.028513654 | 0.026974503 |
| ENSG00000164253 | 0.071032032 | 0.039942822 | 0.037253367 | 0.029667856 |
| ENSG00000144481 | 0.016539646 | 0.02506112  | 0.026317573 | 0.015657366 |
| ENSG00000158480 | 0.037225106 | 0.036926909 | 0.034481136 | 0.027109351 |
| ENSG00000163534 | 0.017519847 | 0.028653003 | 0.026259365 | 0.018063879 |
| ENSG00000168778 | 0.014963441 | 0.025947787 | 0.025109188 | 0.015063397 |
| ENSG00000108828 | 0.027599358 | 0.032181477 | 0.03085231  | 0.029894039 |
| ENSG00000179918 | 0.036677334 | 0.035544362 | 0.036536037 | 0.030694245 |
| ENSG00000185345 | 0.015694996 | 0.025052756 | 0.024827238 | 0.014768825 |
| ENSG00000132286 | 0.031395082 | 0.037407874 | 0.043357762 | 0.032552624 |
| ENSG00000005436 | 0.031815688 | 0.036791761 | 0.032542434 | 0.026512702 |
| ENSG00000181552 | 0.016146831 | 0.025163254 | 0.025140187 | 0.015494013 |
| ENSG00000186501 | 0.025111192 | 0.034900312 | 0.038455824 | 0.024451122 |
| ENSG00000106460 | 0.035675929 | 0.044894255 | 0.038724646 | 0.029735835 |
| ENSG00000158457 | 0.030885443 | 0.036284628 | 0.034063575 | 0.034741047 |
| ENSG00000129422 | 0.034399601 | 0.028457797 | 0.026078172 | 0.033018856 |
| ENSG00000132510 | 0.034015729 | 0.038610434 | 0.040854847 | 0.034273297 |
| ENSG00000165841 | 0.015195424 | 0.025318026 | 0.025192153 | 0.015401415 |
| ENSG00000111261 | 0.017915595 | 0.024990338 | 0.025849966 | 0.017834457 |
| ENSG00000169100 | 0.022912855 | 0.02815356  | 0.028141189 | 0.022617071 |
| ENSG00000090006 | 0.033954895 | 0.029748465 | 0.038396034 | 0.034531172 |
| ENSG00000147576 | 0.046918331 | 0.039820593 | 0.037162154 | 0.040274424 |
| ENSG00000085185 | 0.052241148 | 0.045492741 | 0.038214511 | 0.038051408 |
| ENSG00000185504 | 0.031341841 | 0.038219245 | 0.036966089 | 0.027853913 |
| ENSG00000172324 | 0.01671574  | 0.025770197 | 0.025907617 | 0.015121045 |
| ENSG00000083544 | 0.032607305 | 0.036569268 | 0.030262755 | 0.023464603 |
| ENSG00000040731 | 0.017353326 | 0.025499929 | 0.025002703 | 0.017090183 |
| ENSG00000170627 | 0.247734321 | 0.156626613 | 0.13124397  | 0.177745352 |
| ENSG00000084093 | 0.017960755 | 0.026534132 | 0.025498135 | 0.016589776 |
| ENSG00000134343 | 0.08327361  | 0.038213392 | 0.025808665 | 0.029404688 |
| ENSG00000130313 | 0.023881031 | 0.030695752 | 0.030547526 | 0.027775205 |
| ENSG00000182580 | 0.014760424 | 0.024753045 | 0.02507466  | 0.014469115 |
| ENSG00000104899 | 0.02245244  | 0.028148074 | 0.026155718 | 0.017778096 |
| ENSG00000086730 | 0.035008058 | 0.044940658 | 0.040701958 | 0.059215228 |
| ENSG00000132964 | 0.032942118 | 0.038833266 | 0.031557516 | 0.026315952 |
| ENSG00000244038 | 0.02271916  | 0.027078056 | 0.027154089 | 0.022276955 |
| ENSG00000103152 | 0.024119857 | 0.027026873 | 0.028909027 | 0.022633396 |
| ENSG00000104365 | 0.032001254 | 0.036277277 | 0.03534737  | 0.031082232 |
| ENSG00000178297 | 0.017493052 | 0.025360058 | 0.025396969 | 0.016781924 |
| ENSG00000213398 | 0.032601409 | 0.034973518 | 0.028826867 | 0.032931013 |
| ENSG00000157680 | 0.031621785 | 0.029523736 | 0.031768496 | 0.028477484 |
| ENSG00000139428 | 0.025980918 | 0.034494921 | 0.031897606 | 0.022465829 |
| ENSG00000070610 | 0.025746247 | 0.033276954 | 0.032079611 | 0.030107173 |
| ENSG00000139160 | 0.015907316 | 0.024164723 | 0.025388731 | 0.014919221 |
| ENSG00000183072 | 0.01612534  | 0.024255106 | 0.025641349 | 0.014323036 |
| ENSG00000133105 | 0.017388142 | 0.024944729 | 0.024773709 | 0.016974077 |
| ENSG00000131019 | 0.015909137 | 0.026064343 | 0.025412344 | 0.014948108 |

|                 |             |             |             |             |
|-----------------|-------------|-------------|-------------|-------------|
| ENSG00000125945 | 0.027101627 | 0.034349254 | 0.028450333 | 0.024005537 |
| ENSG00000155254 | 0.048141674 | 0.04229426  | 0.036755317 | 0.034221092 |
| ENSG00000106633 | 0.018167468 | 0.025623234 | 0.025633135 | 0.015669068 |
| ENSG00000077279 | 0.015830913 | 0.024840966 | 0.024326435 | 0.016010098 |
| ENSG00000152936 | 0.01577842  | 0.026504228 | 0.024933753 | 0.015918836 |
| ENSG00000074319 | 0.025462869 | 0.032625224 | 0.029731964 | 0.024018857 |
| ENSG00000172425 | 0.016520875 | 0.026363342 | 0.024847494 | 0.016488698 |
| ENSG00000196091 | 0.020452509 | 0.026086784 | 0.027270623 | 0.017485424 |
| ENSG00000226929 | 0.016699191 | 0.024952739 | 0.025430445 | 0.016126594 |
| ENSG00000244752 | 0.071350211 | 0.095569022 | 0.082207731 | 0.074804017 |
| ENSG00000162734 | 0.030460694 | 0.031962189 | 0.029557879 | 0.026571534 |
| ENSG00000120896 | 0.035824297 | 0.035057905 | 0.029627022 | 0.028989433 |
| ENSG00000111145 | 0.017751237 | 0.025588167 | 0.02657967  | 0.019157726 |
| ENSG00000141380 | 0.037630811 | 0.038398059 | 0.034620883 | 0.036662726 |
| ENSG00000213906 | 0.016325107 | 0.026359619 | 0.025080107 | 0.016344976 |
| ENSG00000108349 | 0.023467907 | 0.030094355 | 0.032223876 | 0.022628115 |
| ENSG00000112212 | 0.017133324 | 0.024105912 | 0.024600174 | 0.015354769 |
| ENSG00000057294 | 0.0296516   | 0.027844672 | 0.027506467 | 0.030917202 |
| ENSG00000117143 | 0.035595701 | 0.033450059 | 0.037504234 | 0.034025894 |
| ENSG00000197971 | 0.016937402 | 0.026480593 | 0.026138315 | 0.015032563 |
| ENSG00000110888 | 0.016452013 | 0.026359808 | 0.025430538 | 0.01697878  |
| ENSG00000171161 | 0.023903937 | 0.030341499 | 0.030999977 | 0.024828878 |
| ENSG00000065150 | 0.043791858 | 0.050030437 | 0.034892916 | 0.039559078 |
| ENSG00000066248 | 0.016548329 | 0.024607335 | 0.02440422  | 0.015088978 |
| ENSG00000151062 | 0.036516229 | 0.040001909 | 0.032413047 | 0.035626177 |
| ENSG00000161647 | 0.015240008 | 0.024902271 | 0.024529949 | 0.014909    |
| ENSG00000157064 | 0.016324458 | 0.025574693 | 0.024898344 | 0.015451095 |
| ENSG00000110243 | 0.014868848 | 0.025481797 | 0.024947621 | 0.015821409 |
| ENSG00000004846 | 0.015973079 | 0.025476493 | 0.024327915 | 0.016331585 |
| ENSG00000128917 | 0.016883581 | 0.027984397 | 0.025619621 | 0.017755732 |
| ENSG00000171402 | 0.016593462 | 0.025448275 | 0.026399808 | 0.01597561  |
| ENSG00000142156 | 0.022039232 | 0.025852719 | 0.024526644 | 0.017891437 |
| ENSG00000196497 | 0.035405901 | 0.037962488 | 0.037004313 | 0.034536217 |
| ENSG00000196689 | 0.016245322 | 0.025356576 | 0.025418644 | 0.016623593 |
| ENSG00000111716 | 0.017203906 | 0.025293042 | 0.024947901 | 0.01823831  |
| ENSG00000164308 | 0.026759334 | 0.029479953 | 0.032388893 | 0.022556412 |
| ENSG00000156500 | 0.032486393 | 0.036763729 | 0.031548835 | 0.028599088 |
| ENSG00000080546 | 0.046177283 | 0.048901748 | 0.041177227 | 0.04082755  |
| ENSG00000166750 | 0.061432403 | 0.061764843 | 0.069621554 | 0.056367793 |
| ENSG00000064195 | 0.01709525  | 0.026612274 | 0.025149017 | 0.016749002 |
| ENSG00000113575 | 0.019305951 | 0.027487025 | 0.028282035 | 0.019495793 |
| ENSG00000198573 | 0.037817578 | 0.025059499 | 0.025443914 | 0.015155805 |
| ENSG00000145391 | 0.016992931 | 0.024727359 | 0.025960782 | 0.016174988 |
| ENSG00000174016 | 0.016263252 | 0.026462277 | 0.026696101 | 0.01715988  |
| ENSG00000164048 | 0.037396706 | 0.037140753 | 0.042040432 | 0.035945467 |
| ENSG00000173401 | 0.025558818 | 0.027333112 | 0.026949501 | 0.01636651  |
| ENSG00000164022 | 0.029315889 | 0.033086493 | 0.030816501 | 0.022081401 |
| ENSG00000155252 | 0.028739636 | 0.030331472 | 0.032142985 | 0.026922348 |
| ENSG00000130528 | 0.015662307 | 0.024669079 | 0.025037317 | 0.015125267 |
| ENSG00000153250 | 0.074228743 | 0.064726818 | 0.054169482 | 0.076175551 |
| ENSG00000133256 | 0.078852576 | 0.054630293 | 0.049880735 | 0.059910339 |
| ENSG00000198788 | 0.018545183 | 0.025694809 | 0.027791957 | 0.016284942 |
| ENSG00000126878 | 0.018062306 | 0.024945262 | 0.02546386  | 0.066756836 |
| ENSG00000142230 | 0.026019496 | 0.030136205 | 0.028465718 | 0.022257317 |

|                 |             |             |             |             |
|-----------------|-------------|-------------|-------------|-------------|
| ENSG00000198874 | 0.02731784  | 0.032470337 | 0.028173224 | 0.02402898  |
| ENSG00000025796 | 0.027212831 | 0.030968654 | 0.029956743 | 0.027157358 |
| ENSG00000157734 | 0.032346982 | 0.034387312 | 0.030142238 | 0.026669188 |
| ENSG00000143740 | 0.030253317 | 0.035268924 | 0.03256237  | 0.024738755 |
| ENSG00000057757 | 0.024304975 | 0.029974266 | 0.031907283 | 0.019953667 |
| ENSG00000011083 | 0.015530767 | 0.02471772  | 0.024954183 | 0.014468907 |
| ENSG00000101082 | 0.0183458   | 0.031481052 | 0.030503093 | 0.023131193 |
| ENSG00000164363 | 0.016455411 | 0.025108895 | 0.025588339 | 0.01502335  |
| ENSG00000131759 | 0.03490069  | 0.037826353 | 0.034882353 | 0.038897688 |
| ENSG00000100749 | 0.035212803 | 0.036049333 | 0.03389034  | 0.033910365 |
| ENSG00000162694 | 0.048647788 | 0.044407959 | 0.046439044 | 0.045218369 |
| ENSG00000177731 | 0.025331207 | 0.031362445 | 0.027248946 | 0.023157746 |
| ENSG00000140950 | 0.017288716 | 0.025652756 | 0.024648213 | 0.01838469  |
| ENSG00000196470 | 0.033587699 | 0.046176923 | 0.039844768 | 0.030170876 |
| ENSG00000151572 | 0.014854423 | 0.02512116  | 0.024590666 | 0.013913374 |
| ENSG00000184205 | 0.034689954 | 0.034517988 | 0.037679217 | 0.033300871 |
| ENSG00000162723 | 0.014606913 | 0.024608443 | 0.025460164 | 0.014754084 |
| ENSG00000119782 | 0.030705105 | 0.032774823 | 0.031970939 | 0.030875292 |
| ENSG00000081870 | 0.028455566 | 0.030381772 | 0.029394844 | 0.025545873 |
| ENSG00000106012 | 0.022377969 | 0.025908964 | 0.027480879 | 0.019874141 |
| ENSG00000167711 | 0.016547898 | 0.025546622 | 0.025689547 | 0.015533176 |
| ENSG00000165553 | 0.016568576 | 0.025021437 | 0.025202168 | 0.015757587 |
| ENSG00000008256 | 0.059854758 | 0.059873459 | 0.054701024 | 0.072478237 |
| ENSG00000176619 | 0.029796066 | 0.031126059 | 0.033118532 | 0.026023782 |
| ENSG00000112695 | 0.022029572 | 0.026896079 | 0.028085979 | 0.017077134 |
| ENSG00000074201 | 0.024409872 | 0.030072918 | 0.028433146 | 0.018368375 |
| ENSG00000188033 | 0.030048989 | 0.037548144 | 0.030594689 | 0.027349952 |
| ENSG00000110628 | 0.018863004 | 0.027447048 | 0.026358762 | 0.020446277 |
| ENSG00000131808 | 0.015454945 | 0.024418657 | 0.024824884 | 0.014758124 |
| ENSG00000135838 | 0.070828967 | 0.056376065 | 0.039073284 | 0.055807907 |
| ENSG00000115816 | 0.024843096 | 0.02943628  | 0.029932677 | 0.023699106 |
| ENSG00000123329 | 0.036078886 | 0.036981622 | 0.035691578 | 0.035316173 |
| ENSG00000170365 | 0.025609283 | 0.031508543 | 0.028033397 | 0.026772947 |
| ENSG00000134612 | 0.015467029 | 0.024551421 | 0.024849249 | 0.014895329 |
| ENSG00000163930 | 0.019938505 | 0.029175825 | 0.032170272 | 0.025257861 |
| ENSG00000130939 | 0.029267572 | 0.034253013 | 0.029009899 | 0.023735468 |
| ENSG00000155959 | 0.022890263 | 0.029514429 | 0.027955915 | 0.025708058 |
| ENSG00000134900 | 0.035061661 | 0.036299426 | 0.032665179 | 0.029470127 |
| ENSG00000134030 | 0.02077169  | 0.030220315 | 0.029671    | 0.023312854 |
| ENSG00000014138 | 0.04070312  | 0.038498476 | 0.033854104 | 0.029337586 |
| ENSG00000146592 | 0.01569976  | 0.025118203 | 0.024466722 | 0.016340657 |
| ENSG00000084733 | 0.030738182 | 0.035521832 | 0.029663289 | 0.023534738 |
| ENSG00000104805 | 0.028432292 | 0.029466526 | 0.034014853 | 0.028033666 |
| ENSG00000163825 | 0.016808824 | 0.025183589 | 0.025045554 | 0.01567675  |
| ENSG00000147383 | 0.024495171 | 0.030078769 | 0.03040281  | 0.022998429 |
| ENSG00000047597 | 0.022659413 | 0.027591479 | 0.02561074  | 0.016142759 |
| ENSG00000163389 | 0.038849883 | 0.038566389 | 0.039640178 | 0.03408696  |
| ENSG00000101222 | 0.016827807 | 0.025742984 | 0.024249969 | 0.015729533 |
| ENSG00000020256 | 0.039819384 | 0.042602448 | 0.034754826 | 0.030190584 |
| ENSG00000183878 | 0.152333082 | 0.169655655 | 0.14721303  | 0.146050598 |
| ENSG00000132563 | 0.053843314 | 0.046906459 | 0.045729036 | 0.051378656 |
| ENSG00000181274 | 0.043506134 | 0.037612452 | 0.037496418 | 0.035941408 |
| ENSG00000144681 | 0.016416828 | 0.02602207  | 0.026178072 | 0.016181822 |
| ENSG00000154719 | 0.027340576 | 0.031719883 | 0.028806352 | 0.022398815 |

|                 |             |             |             |             |
|-----------------|-------------|-------------|-------------|-------------|
| ENSG00000151164 | 0.018065245 | 0.027145268 | 0.025188055 | 0.015263671 |
| ENSG00000184033 | 0.015564992 | 0.025649274 | 0.026295092 | 0.015017344 |
| ENSG00000153832 | 0.025359664 | 0.026885426 | 0.027136685 | 0.018992105 |
| ENSG00000136110 | 0.022593183 | 0.037233048 | 0.024854835 | 0.032686828 |
| ENSG00000163867 | 0.018008295 | 0.025621548 | 0.0242867   | 0.015047185 |
| ENSG00000144730 | 0.01681815  | 0.02502639  | 0.024558803 | 0.014813048 |
| ENSG00000186907 | 0.015164201 | 0.024482934 | 0.024427334 | 0.015191406 |
| ENSG0000005448  | 0.034028134 | 0.032122306 | 0.032196539 | 0.026944317 |
| ENSG00000136146 | 0.024079032 | 0.028915625 | 0.030155351 | 0.022377254 |
| ENSG00000105607 | 0.03903511  | 0.035142079 | 0.03171247  | 0.032217617 |
| ENSG00000213859 | 0.01580686  | 0.026370952 | 0.025008764 | 0.016393006 |
| ENSG00000170248 | 0.022975268 | 0.03132462  | 0.028239928 | 0.021429477 |
| ENSG00000196119 | 0.017169227 | 0.025038893 | 0.024370679 | 0.016189261 |
| ENSG00000175283 | 0.035798452 | 0.047954245 | 0.049598433 | 0.040371102 |
| ENSG00000137547 | 0.023345322 | 0.029024381 | 0.027894996 | 0.023418506 |
| ENSG00000101441 | 0.01581247  | 0.024815825 | 0.024347469 | 0.015365458 |
| ENSG00000180176 | 0.019781656 | 0.025157568 | 0.02582605  | 0.017058398 |
| ENSG00000023608 | 0.048536908 | 0.043842947 | 0.044297917 | 0.055549245 |
| ENSG00000105974 | 0.034732554 | 0.029536427 | 0.03314522  | 0.023601152 |
| ENSG00000185885 | 0.041578515 | 0.035806849 | 0.038088298 | 0.035634934 |
| ENSG00000101825 | 0.0169422   | 0.025240757 | 0.024392638 | 0.015334524 |
| ENSG00000161326 | 0.045820996 | 0.052481568 | 0.044038978 | 0.046719747 |
| ENSG00000221963 | 0.031037478 | 0.034415667 | 0.037918068 | 0.026747348 |
| ENSG00000132906 | 0.031755271 | 0.036892256 | 0.040833892 | 0.027419959 |
| ENSG00000160075 | 0.025672732 | 0.031143295 | 0.029889171 | 0.022203556 |
| ENSG00000149823 | 0.020743983 | 0.027423491 | 0.030184207 | 0.020664605 |
| ENSG00000134827 | 0.016346545 | 0.024652814 | 0.026063536 | 0.018131124 |
| ENSG00000136404 | 0.064910868 | 0.063448615 | 0.050425595 | 0.073600837 |
| ENSG00000163605 | 0.029761445 | 0.033236861 | 0.034754935 | 0.031474249 |
| ENSG00000163785 | 0.038244198 | 0.043542434 | 0.035311736 | 0.036019613 |
| ENSG00000240038 | 0.031370225 | 0.033841167 | 0.032493197 | 0.027908801 |
| ENSG00000125878 | 0.023953924 | 0.030863742 | 0.028670873 | 0.021804004 |
| ENSG00000154447 | 0.050295045 | 0.040810369 | 0.036939403 | 0.042477507 |
| ENSG00000164175 | 0.016979794 | 0.025638932 | 0.024234627 | 0.018313654 |
| ENSG00000163518 | 0.094026254 | 0.089927901 | 0.066465315 | 0.090425331 |
| ENSG00000133937 | 0.014714111 | 0.025083432 | 0.024743626 | 0.01492261  |
| ENSG00000204475 | 0.07176846  | 0.075615461 | 0.093164193 | 0.072276041 |
| ENSG00000181264 | 0.04470009  | 0.038496063 | 0.033094703 | 0.037001995 |
| ENSG00000145920 | 0.016634152 | 0.024847354 | 0.025184609 | 0.015372365 |
| ENSG00000105141 | 0.014949974 | 0.024714983 | 0.025510843 | 0.014356657 |
| ENSG00000149260 | 0.017761342 | 0.026000358 | 0.026402797 | 0.016098759 |
| ENSG00000058729 | 0.028633515 | 0.033685302 | 0.035405751 | 0.02393019  |
| ENSG00000144485 | 0.018252497 | 0.025507982 | 0.025089075 | 0.015266513 |
| ENSG00000141140 | 0.035817144 | 0.041537871 | 0.033033236 | 0.026265198 |
| ENSG00000166220 | 0.023115562 | 0.026685021 | 0.030444496 | 0.018322901 |
| ENSG00000139574 | 0.016932401 | 0.026581747 | 0.025344334 | 0.015732585 |
| ENSG00000196378 | 0.026817251 | 0.030568474 | 0.036509687 | 0.02794329  |
| ENSG00000175344 | 0.017026525 | 0.026370944 | 0.025951064 | 0.017027328 |
| ENSG00000100629 | 0.059998794 | 0.059219468 | 0.04842248  | 0.042635193 |
| ENSG00000123364 | 0.015557403 | 0.02525114  | 0.024917023 | 0.01701932  |
| ENSG00000187581 | 0.01952695  | 0.030404387 | 0.025888551 | 0.020814837 |
| ENSG00000078674 | 0.023689951 | 0.032882546 | 0.029180156 | 0.024225477 |
| ENSG00000168172 | 0.029699809 | 0.039946378 | 0.03277661  | 0.027437962 |
| ENSG00000135390 | 0.019579278 | 0.025105801 | 0.02610856  | 0.01673815  |

|                 |             |             |             |             |
|-----------------|-------------|-------------|-------------|-------------|
| ENSG00000184995 | 0.017242453 | 0.026038138 | 0.025426658 | 0.01744632  |
| ENSG00000182950 | 0.01682306  | 0.025049116 | 0.025308563 | 0.014583336 |
| ENSG00000095539 | 0.0165681   | 0.024943784 | 0.024569319 | 0.016520254 |
| ENSG00000129473 | 0.037459622 | 0.034139434 | 0.028443728 | 0.025320617 |
| ENSG00000154429 | 0.03045335  | 0.027582236 | 0.030106396 | 0.024336263 |
| ENSG00000077458 | 0.040065364 | 0.04369602  | 0.038223442 | 0.037087199 |
| ENSG00000166889 | 0.026159079 | 0.031215259 | 0.031317924 | 0.022616691 |
| ENSG00000105755 | 0.0382973   | 0.035005195 | 0.040764041 | 0.039005075 |
| ENSG00000187866 | 0.028420405 | 0.033782241 | 0.03158013  | 0.020824619 |
| ENSG00000198838 | 0.026870359 | 0.026090325 | 0.026591245 | 0.01787237  |
| ENSG00000188641 | 0.112522687 | 0.075730975 | 0.069922883 | 0.068397809 |
| ENSG00000117360 | 0.025554967 | 0.030150877 | 0.029064498 | 0.023660674 |
| ENSG00000150782 | 0.032154818 | 0.032222821 | 0.032269524 | 0.033131106 |
| ENSG00000120251 | 0.018114213 | 0.026201827 | 0.026073861 | 0.017261563 |
| ENSG00000168818 | 0.024616773 | 0.033914673 | 0.033544206 | 0.024626757 |
| ENSG00000155393 | 0.033842972 | 0.036599594 | 0.034013614 | 0.026718583 |
| ENSG00000100344 | 0.015531428 | 0.024771979 | 0.024868137 | 0.014461612 |
| ENSG00000185274 | 0.015812052 | 0.025310028 | 0.025714507 | 0.016364155 |
| ENSG00000185112 | 0.078368669 | 0.054536849 | 0.063211335 | 0.059845358 |
| ENSG00000170925 | 0.016561652 | 0.025550703 | 0.024842748 | 0.015962255 |
| ENSG00000165887 | 0.026143263 | 0.028590772 | 0.026102615 | 0.024859438 |
| ENSG00000121064 | 0.033467076 | 0.038146905 | 0.035923992 | 0.036405501 |
| ENSG00000197147 | 0.026312789 | 0.029393668 | 0.027506267 | 0.022242994 |
| ENSG00000163646 | 0.015835548 | 0.025290483 | 0.024497427 | 0.015730871 |
| ENSG00000178522 | 0.016139764 | 0.02520175  | 0.024806178 | 0.014885817 |
| ENSG00000186106 | 0.041726439 | 0.041213184 | 0.035889856 | 0.029121846 |
| ENSG00000109536 | 0.023475197 | 0.029049424 | 0.027388294 | 0.027730767 |
| ENSG00000139985 | 0.015865115 | 0.025346223 | 0.024793801 | 0.015696741 |
| ENSG00000138316 | 0.016122271 | 0.027298505 | 0.025874459 | 0.01601599  |
| ENSG00000078967 | 0.036666561 | 0.040081917 | 0.03133514  | 0.032216514 |
| ENSG00000171014 | 0.016781617 | 0.025096055 | 0.02494487  | 0.016194552 |
| ENSG00000169871 | 0.030298864 | 0.034251792 | 0.02979683  | 0.028000905 |
| ENSG00000198198 | 0.018811167 | 0.02685486  | 0.027448214 | 0.023293443 |
| ENSG00000105198 | 0.019223972 | 0.025009853 | 0.025342492 | 0.016004387 |
| ENSG00000132676 | 0.020966    | 0.026502109 | 0.026622752 | 0.01734102  |
| ENSG00000119729 | 0.048787375 | 0.043252222 | 0.046934511 | 0.042553785 |
| ENSG00000108819 | 0.01714085  | 0.026739968 | 0.024938327 | 0.01793339  |
| ENSG00000137561 | 0.015687404 | 0.024939831 | 0.024543655 | 0.015299292 |
| ENSG00000129625 | 0.037155104 | 0.042494663 | 0.036066011 | 0.028745843 |
| ENSG00000135312 | 0.017729466 | 0.025772223 | 0.027274998 | 0.015766549 |
| ENSG00000183888 | 0.017536259 | 0.027221039 | 0.025002164 | 0.020490594 |
| ENSG00000121766 | 0.028902553 | 0.035545411 | 0.032776788 | 0.02147593  |
| ENSG00000135913 | 0.033730885 | 0.04700652  | 0.036653142 | 0.035862051 |
| ENSG00000069696 | 0.020819441 | 0.027225986 | 0.027112576 | 0.019518774 |
| ENSG00000130643 | 0.014565541 | 0.025016205 | 0.02489278  | 0.014731794 |
| ENSG00000113621 | 0.031979162 | 0.034584369 | 0.035446886 | 0.033145382 |
| ENSG00000110852 | 0.049199621 | 0.062177342 | 0.055939711 | 0.066867613 |
| ENSG00000145423 | 0.014597296 | 0.024971281 | 0.024629392 | 0.014752397 |
| ENSG00000182256 | 0.016441024 | 0.025730353 | 0.025083917 | 0.017213004 |
| ENSG00000123349 | 0.016790108 | 0.025208886 | 0.02602729  | 0.018206311 |
| ENSG00000137312 | 0.026023208 | 0.031936469 | 0.03611066  | 0.027397611 |
| ENSG00000117758 | 0.03167775  | 0.037205558 | 0.035497004 | 0.02920175  |
| ENSG00000111361 | 0.024234492 | 0.029804858 | 0.030670704 | 0.02130459  |
| ENSG00000127616 | 0.033282411 | 0.035228641 | 0.033586325 | 0.028441752 |

|                 |             |             |             |             |
|-----------------|-------------|-------------|-------------|-------------|
| ENSG0000070808  | 0.015822132 | 0.025478183 | 0.025608114 | 0.014937551 |
| ENSG00000119041 | 0.029718195 | 0.033742216 | 0.030950355 | 0.028375339 |
| ENSG00000150275 | 0.017012112 | 0.025092788 | 0.025100391 | 0.01634324  |
| ENSG00000151445 | 0.02888455  | 0.034669472 | 0.030400665 | 0.025227085 |
| ENSG00000169826 | 0.048359555 | 0.049085819 | 0.041648094 | 0.041556564 |
| ENSG00000147003 | 0.019339797 | 0.028079385 | 0.026812923 | 0.019931975 |
| ENSG00000124171 | 0.016641396 | 0.025248044 | 0.02542389  | 0.017118988 |
| ENSG00000170892 | 0.024900062 | 0.030293921 | 0.030974583 | 0.027163068 |
| ENSG00000155265 | 0.017578427 | 0.026269468 | 0.026405169 | 0.016594337 |
| ENSG00000166183 | 0.015966982 | 0.026460607 | 0.024451412 | 0.014784015 |
| ENSG00000162951 | 0.017189524 | 0.024952771 | 0.024804278 | 0.016331479 |
| ENSG00000180929 | 0.016338833 | 0.025234985 | 0.024827981 | 0.014540865 |
| ENSG00000130766 | 0.032199332 | 0.03282531  | 0.034225977 | 0.032076905 |
| ENSG00000174384 | 0.015736659 | 0.025136597 | 0.02540097  | 0.015005792 |
| ENSG00000161958 | 0.019727276 | 0.031061083 | 0.026603527 | 0.018892517 |
| ENSG00000133069 | 0.015682983 | 0.025692535 | 0.024768683 | 0.015800585 |
| ENSG00000166415 | 0.016404228 | 0.025616544 | 0.0251674   | 0.01616252  |
| ENSG00000162643 | 0.054988105 | 0.04227094  | 0.038703021 | 0.040042606 |
| ENSG00000205758 | 0.026339126 | 0.03522896  | 0.032059483 | 0.023281544 |
| ENSG00000161714 | 0.018446372 | 0.025720206 | 0.025606281 | 0.01706755  |
| ENSG00000156873 | 0.020856908 | 0.02956581  | 0.02984699  | 0.020824285 |
| ENSG00000147145 | 0.016436679 | 0.027172337 | 0.026526232 | 0.016911975 |
| ENSG00000162062 | 0.050172673 | 0.049829597 | 0.03753342  | 0.037001291 |
| ENSG00000141562 | 0.038224491 | 0.035997768 | 0.035804393 | 0.038863865 |
| ENSG00000206422 | 0.01498921  | 0.025230554 | 0.024135574 | 0.015354163 |
| ENSG00000204370 | 0.02159454  | 0.02823717  | 0.026862914 | 0.021979927 |
| ENSG00000142864 | 0.01927952  | 0.025934157 | 0.027848308 | 0.01674218  |
| ENSG00000047936 | 0.015928909 | 0.024928064 | 0.025212809 | 0.016215856 |
| ENSG00000108309 | 0.017485769 | 0.024645277 | 0.02461709  | 0.015697959 |
| ENSG00000131374 | 0.032665541 | 0.041701631 | 0.034503773 | 0.02946621  |
| ENSG00000103056 | 0.019449661 | 0.026502278 | 0.025946735 | 0.018616718 |
| ENSG00000129315 | 0.015337154 | 0.025643163 | 0.02803896  | 0.016536094 |
| ENSG00000124508 | 0.019544101 | 0.028487787 | 0.028463758 | 0.022066595 |
| ENSG00000154814 | 0.040073031 | 0.038263357 | 0.040598904 | 0.045599747 |
| ENSG00000081818 | 0.015649065 | 0.024656795 | 0.02518582  | 0.014811057 |
| ENSG00000213886 | 0.138559471 | 0.106363508 | 0.107347078 | 0.120090777 |
| ENSG00000135636 | 0.015711608 | 0.025017758 | 0.02381977  | 0.014357504 |
| ENSG00000223501 | 0.02799454  | 0.033569376 | 0.032230677 | 0.024086966 |
| ENSG00000152133 | 0.035693309 | 0.033061752 | 0.033426153 | 0.033473795 |
| ENSG00000146063 | 0.023036443 | 0.02872466  | 0.03598414  | 0.020034212 |
| ENSG00000075275 | 0.017267009 | 0.025406782 | 0.025168235 | 0.014534106 |
| ENSG00000142623 | 0.017416913 | 0.025389438 | 0.025799008 | 0.016478435 |
| ENSG00000101624 | 0.034409182 | 0.03800752  | 0.033380973 | 0.032538558 |
| ENSG00000168291 | 0.026435849 | 0.030029601 | 0.029364976 | 0.021842827 |
| ENSG00000164897 | 0.024264635 | 0.027072309 | 0.037421627 | 0.024458858 |
| ENSG00000128849 | 0.079206769 | 0.040130417 | 0.033105543 | 0.045402736 |
| ENSG00000097046 | 0.048455962 | 0.038354694 | 0.036891241 | 0.031827436 |
| ENSG00000179862 | 0.072592755 | 0.05766785  | 0.058593692 | 0.049782101 |
| ENSG00000236981 | 0.016221744 | 0.026595373 | 0.024733532 | 0.016843367 |
| ENSG00000164129 | 0.015251543 | 0.024222579 | 0.024705263 | 0.013862638 |
| ENSG00000188064 | 0.018442841 | 0.026731025 | 0.027013659 | 0.018004537 |
| ENSG00000143751 | 0.020104251 | 0.032687911 | 0.039991017 | 0.020991709 |
| ENSG00000103426 | 0.0264302   | 0.033846229 | 0.046564762 | 0.035414818 |
| ENSG00000153294 | 0.017706262 | 0.026128766 | 0.024682776 | 0.016900803 |

|                 |             |             |             |             |
|-----------------|-------------|-------------|-------------|-------------|
| ENSG00000183709 | 0.018955845 | 0.026495223 | 0.026606767 | 0.018521862 |
| ENSG00000171495 | 0.016463702 | 0.025624065 | 0.024594068 | 0.014613516 |
| ENSG00000178021 | 0.016216827 | 0.025831088 | 0.025629512 | 0.017180784 |
| ENSG00000083750 | 0.036257828 | 0.036740286 | 0.039486911 | 0.029033504 |
| ENSG00000171314 | 0.03000313  | 0.032226811 | 0.030985829 | 0.023980364 |
| ENSG00000066557 | 0.030854858 | 0.038518229 | 0.030239522 | 0.027910506 |
| ENSG00000206190 | 0.02562544  | 0.028490671 | 0.027296213 | 0.023172721 |
| ENSG00000140090 | 0.016333402 | 0.026098019 | 0.025158413 | 0.016807209 |
| ENSG00000182645 | 0.017164444 | 0.025577894 | 0.025196334 | 0.015123616 |
| ENSG00000185483 | 0.061076418 | 0.045229158 | 0.031732694 | 0.038574321 |
| ENSG00000126218 | 0.015340014 | 0.024781093 | 0.024307062 | 0.014992008 |
| ENSG00000172543 | 0.024275316 | 0.036614701 | 0.029925406 | 0.046822127 |
| ENSG00000169857 | 0.038472331 | 0.042380008 | 0.035359231 | 0.034482547 |
| ENSG00000165583 | 0.019479756 | 0.0275022   | 0.028797743 | 0.022624567 |
| ENSG00000164099 | 0.018534291 | 0.02763224  | 0.026837349 | 0.01711706  |
| ENSG00000156535 | 0.045543904 | 0.038234776 | 0.034483381 | 0.037381447 |
| ENSG00000170485 | 0.015871004 | 0.024889866 | 0.024641104 | 0.015452352 |
| ENSG00000182795 | 0.01960718  | 0.027051257 | 0.025378609 | 0.01904612  |
| ENSG00000158470 | 0.036776093 | 0.042945108 | 0.040973234 | 0.036019633 |
| ENSG00000065057 | 0.043986287 | 0.035912979 | 0.03626937  | 0.032877973 |
| ENSG00000189042 | 0.02783242  | 0.037041398 | 0.03451024  | 0.028933348 |
| ENSG00000171861 | 0.028260204 | 0.031214628 | 0.034075545 | 0.023471985 |
| ENSG00000108528 | 0.035956825 | 0.034501476 | 0.029900767 | 0.03204883  |
| ENSG00000018625 | 0.015340776 | 0.024552661 | 0.024234434 | 0.01373202  |
| ENSG00000106588 | 0.019808761 | 0.027674986 | 0.026379399 | 0.016595758 |
| ENSG00000113552 | 0.049627059 | 0.042098101 | 0.034404382 | 0.036698515 |
| ENSG00000135842 | 0.044401176 | 0.045814992 | 0.044844366 | 0.052704982 |
| ENSG00000099968 | 0.028114603 | 0.034517039 | 0.032369853 | 0.02354787  |
| ENSG00000115541 | 0.022947394 | 0.029366688 | 0.026890989 | 0.019581239 |
| ENSG00000146233 | 0.018954735 | 0.027176675 | 0.026783719 | 0.01695007  |
| ENSG00000139117 | 0.057397837 | 0.07977396  | 0.051935083 | 0.058617763 |
| ENSG00000071537 | 0.035376059 | 0.037933763 | 0.036937404 | 0.032474182 |
| ENSG00000121073 | 0.031950668 | 0.033884267 | 0.035887296 | 0.035186561 |
| ENSG00000188042 | 0.039299515 | 0.067158226 | 0.053780121 | 0.057489098 |
| ENSG00000154945 | 0.03228328  | 0.031738062 | 0.036975568 | 0.030671359 |
| ENSG00000179774 | 0.015078479 | 0.024516325 | 0.024732871 | 0.014947563 |
| ENSG00000137571 | 0.058560877 | 0.051937282 | 0.056296052 | 0.048523464 |
| ENSG00000172716 | 0.054890701 | 0.040849942 | 0.042051116 | 0.038003529 |
| ENSG00000179593 | 0.046344683 | 0.047787719 | 0.038464286 | 0.038788953 |
| ENSG00000112706 | 0.01570291  | 0.025226862 | 0.024999916 | 0.014578456 |
| ENSG00000205583 | 0.01713319  | 0.026356993 | 0.026402687 | 0.016616463 |
| ENSG00000187475 | 0.015718338 | 0.024537147 | 0.024672833 | 0.01562946  |
| ENSG00000144115 | 0.063472342 | 0.054156815 | 0.054776363 | 0.067372792 |
| ENSG00000126246 | 0.056251672 | 0.041271376 | 0.036205044 | 0.038745795 |
| ENSG00000197217 | 0.03395798  | 0.032873842 | 0.037114836 | 0.033159691 |
| ENSG00000250486 | 0.038673811 | 0.035908416 | 0.028927961 | 0.029749686 |
| ENSG00000171612 | 0.038798341 | 0.042561326 | 0.045092591 | 0.037436108 |
| ENSG00000169221 | 0.020093565 | 0.028954252 | 0.0338022   | 0.023035282 |
| ENSG00000185745 | 0.09477877  | 0.086805875 | 0.078430716 | 0.076877184 |
| ENSG00000119401 | 0.03437881  | 0.035786595 | 0.030745953 | 0.023131689 |
| ENSG00000138698 | 0.045575628 | 0.045110295 | 0.03636613  | 0.038542929 |
| ENSG00000157353 | 0.025008468 | 0.03284269  | 0.028818393 | 0.025311806 |
| ENSG00000196705 | 0.015876106 | 0.024795673 | 0.025118942 | 0.016226184 |
| ENSG00000125534 | 0.024824706 | 0.031647352 | 0.033189332 | 0.02662508  |

|                 |             |             |             |             |
|-----------------|-------------|-------------|-------------|-------------|
| ENSG00000125046 | 0.018316014 | 0.027482947 | 0.027708075 | 0.018585764 |
| ENSG00000107554 | 0.047030055 | 0.039530021 | 0.032926355 | 0.040404717 |
| ENSG00000184825 | 0.041259858 | 0.038017064 | 0.048320136 | 0.035405751 |
| ENSG00000117408 | 0.035166145 | 0.039219118 | 0.028545304 | 0.028354352 |
| ENSG00000001497 | 0.02816482  | 0.030345058 | 0.030783267 | 0.025846973 |
| ENSG00000168016 | 0.053944962 | 0.060751256 | 0.045616412 | 0.04907559  |
| ENSG00000173535 | 0.017024535 | 0.024279436 | 0.025474597 | 0.014995127 |
| ENSG00000188394 | 0.014203004 | 0.024885201 | 0.025170606 | 0.016485718 |
| ENSG00000163322 | 0.044841893 | 0.047901598 | 0.036773503 | 0.032042309 |
| ENSG00000117410 | 0.025617301 | 0.031847697 | 0.032651826 | 0.025673368 |
| ENSG00000089050 | 0.039607277 | 0.044231188 | 0.036257795 | 0.039949728 |
| ENSG00000158525 | 0.025355954 | 0.026669431 | 0.023768243 | 0.018470462 |
| ENSG00000159147 | 0.044140843 | 0.05625176  | 0.038626767 | 0.053772284 |
| ENSG00000069482 | 0.014741058 | 0.025833643 | 0.024985687 | 0.015450333 |
| ENSG00000105655 | 0.064056468 | 0.042643781 | 0.049924723 | 0.063355265 |
| ENSG00000188738 | 0.028347687 | 0.032655146 | 0.035932632 | 0.046590269 |
| ENSG00000157890 | 0.015133659 | 0.024758976 | 0.02466222  | 0.014761572 |
| ENSG00000196344 | 0.020931473 | 0.028679788 | 0.027645782 | 0.020283803 |
| ENSG00000163491 | 0.01647119  | 0.024967929 | 0.024931446 | 0.016387059 |
| ENSG00000178279 | 0.018283566 | 0.026425773 | 0.024790013 | 0.018907821 |
| ENSG00000198663 | 0.025362814 | 0.031040824 | 0.038836943 | 0.025560499 |
| ENSG00000145246 | 0.043952506 | 0.059200843 | 0.046637091 | 0.039480909 |
| ENSG00000108799 | 0.025342464 | 0.028325259 | 0.028933385 | 0.028365949 |
| ENSG00000066185 | 0.028729468 | 0.029904864 | 0.02861243  | 0.025344556 |
| ENSG00000134538 | 0.015806815 | 0.025746767 | 0.025087725 | 0.016303845 |
| ENSG00000156504 | 0.044406073 | 0.039768303 | 0.036915536 | 0.033221035 |
| ENSG00000164070 | 0.042622946 | 0.045089203 | 0.038782344 | 0.039191847 |
| ENSG00000156427 | 0.021555656 | 0.027013062 | 0.027560748 | 0.017271018 |
| ENSG00000136816 | 0.025341996 | 0.03338525  | 0.033791114 | 0.023198348 |
| ENSG00000197057 | 0.055608758 | 0.037969159 | 0.03563588  | 0.04324361  |
| ENSG00000183530 | 0.015487692 | 0.024599664 | 0.024299303 | 0.015114427 |
| ENSG00000203813 | 0.034842291 | 0.036806577 | 0.036456955 | 0.033798759 |
| ENSG00000135346 | 0.018151317 | 0.025755694 | 0.024933796 | 0.017604594 |
| ENSG00000147654 | 0.01700745  | 0.025296777 | 0.026212599 | 0.017069936 |
| ENSG00000038382 | 0.042580413 | 0.038337185 | 0.039611    | 0.036722472 |
| ENSG00000009780 | 0.030837169 | 0.036331359 | 0.031897455 | 0.023376426 |
| ENSG00000125910 | 0.049134165 | 0.051841809 | 0.046036534 | 0.045336652 |
| ENSG00000139329 | 0.020556044 | 0.024952266 | 0.024980106 | 0.015006731 |
| ENSG00000213516 | 0.041981015 | 0.040732216 | 0.048669676 | 0.044687268 |
| ENSG00000122565 | 0.025173235 | 0.033287915 | 0.033733973 | 0.027650949 |
| ENSG00000160867 | 0.01992963  | 0.030049033 | 0.027242524 | 0.023579272 |
| ENSG00000173627 | 0.015632862 | 0.02531402  | 0.02478185  | 0.016764626 |
| ENSG00000163159 | 0.028782557 | 0.035718235 | 0.031352174 | 0.023397715 |
| ENSG00000073910 | 0.052722772 | 0.05238155  | 0.051747073 | 0.058129887 |
| ENSG00000074621 | 0.049422755 | 0.043788238 | 0.033471603 | 0.033360123 |
| ENSG00000161981 | 0.036136146 | 0.030795725 | 0.031121244 | 0.033210976 |
| ENSG00000186517 | 0.024685642 | 0.030664526 | 0.03032508  | 0.027448503 |
| ENSG00000101938 | 0.016581908 | 0.024501431 | 0.024903513 | 0.016038775 |
| ENSG00000182389 | 0.072405562 | 0.070299515 | 0.058590304 | 0.075868929 |
| ENSG00000089057 | 0.016470788 | 0.02663257  | 0.024287392 | 0.015585317 |
| ENSG00000104889 | 0.03988137  | 0.036764438 | 0.032232988 | 0.029311682 |
| ENSG00000164893 | 0.017123532 | 0.02445427  | 0.024843805 | 0.016380707 |
| ENSG00000113742 | 0.056444741 | 0.046081624 | 0.048709036 | 0.032679318 |
| ENSG00000125845 | 0.0816796   | 0.056115992 | 0.059624315 | 0.061935275 |



|                 |             |             |             |             |
|-----------------|-------------|-------------|-------------|-------------|
| ENSG0000004975  | 0.025357657 | 0.027640789 | 0.029071214 | 0.024259635 |
| ENSG00000124875 | 0.016780488 | 0.025055069 | 0.025731439 | 0.015775396 |
| ENSG00000171759 | 0.044251278 | 0.036626546 | 0.024903524 | 0.030585362 |
| ENSG00000140527 | 0.016886823 | 0.024804326 | 0.026012014 | 0.014939946 |
| ENSG00000129270 | 0.016113185 | 0.024738239 | 0.024936125 | 0.015320255 |
| ENSG00000121853 | 0.017926589 | 0.027300941 | 0.026538461 | 0.015597065 |
| ENSG00000153982 | 0.020794816 | 0.028725486 | 0.02711535  | 0.022815255 |
| ENSG00000110944 | 0.060953683 | 0.05749162  | 0.056429935 | 0.051066121 |
| ENSG00000182500 | 0.024945367 | 0.030651151 | 0.034429999 | 0.032852664 |
| ENSG00000182175 | 0.020535182 | 0.027116783 | 0.02560244  | 0.018630065 |
| ENSG00000163382 | 0.042244519 | 0.038976638 | 0.03704989  | 0.040055641 |
| ENSG00000103227 | 0.016311892 | 0.026153666 | 0.024735096 | 0.015466752 |
| ENSG00000133028 | 0.028877789 | 0.03208138  | 0.032769141 | 0.026547846 |
| ENSG00000033100 | 0.036243666 | 0.047077979 | 0.049139749 | 0.033019039 |
| ENSG00000178690 | 0.018604371 | 0.026087019 | 0.026924235 | 0.018269066 |
| ENSG00000134108 | 0.025974605 | 0.03123618  | 0.033522843 | 0.028625135 |
| ENSG00000185883 | 0.020552714 | 0.027403136 | 0.02943716  | 0.019813113 |
| ENSG00000113119 | 0.038363957 | 0.039508683 | 0.032594994 | 0.031124058 |
| ENSG00000126790 | 0.045714978 | 0.040642678 | 0.038771977 | 0.043615137 |
| ENSG00000165633 | 0.016605539 | 0.025408931 | 0.025882459 | 0.016727108 |
| ENSG00000196449 | 0.032437809 | 0.038762862 | 0.04784175  | 0.037086506 |
| ENSG00000092148 | 0.024829147 | 0.032503701 | 0.029527309 | 0.023079367 |
| ENSG00000214882 | 0.058792379 | 0.044523024 | 0.050273798 | 0.045954722 |
| ENSG00000167664 | 0.016863723 | 0.025160284 | 0.026470331 | 0.015744877 |
| ENSG00000169618 | 0.015098154 | 0.024547994 | 0.024990489 | 0.015342042 |
| ENSG00000189403 | 0.034539709 | 0.034417949 | 0.031308889 | 0.030421897 |
| ENSG00000188315 | 0.044127254 | 0.045964264 | 0.044515177 | 0.037039703 |
| ENSG00000160695 | 0.021613844 | 0.028931433 | 0.027652048 | 0.022666328 |
| ENSG00000172137 | 0.017321809 | 0.026144166 | 0.024951919 | 0.015702374 |
| ENSG00000119636 | 0.02819813  | 0.03013041  | 0.026223719 | 0.03632955  |
| ENSG00000138381 | 0.025247152 | 0.032267449 | 0.033797759 | 0.027538973 |
| ENSG00000010282 | 0.01749758  | 0.02625967  | 0.024334562 | 0.015247577 |
| ENSG00000214160 | 0.033312878 | 0.034342671 | 0.030074224 | 0.026422356 |
| ENSG00000184560 | 0.015332901 | 0.024550567 | 0.025753516 | 0.015562458 |
| ENSG00000185404 | 0.036566698 | 0.036848382 | 0.035782807 | 0.036158984 |
| ENSG00000205916 | 0.017783748 | 0.027525462 | 0.025961473 | 0.017806041 |
| ENSG00000138297 | 0.02538603  | 0.031733558 | 0.03494512  | 0.030907788 |
| ENSG00000130956 | 0.058394882 | 0.04016029  | 0.040153546 | 0.048163691 |
| ENSG00000111859 | 0.0473238   | 0.053243714 | 0.052240052 | 0.04603981  |
| ENSG00000116703 | 0.015619793 | 0.024724894 | 0.024742822 | 0.015043239 |
| ENSG00000235568 | 0.01625181  | 0.025342259 | 0.025173162 | 0.015797968 |
| ENSG00000166448 | 0.018241996 | 0.025747033 | 0.026125593 | 0.01663767  |
| ENSG00000099381 | 0.019967173 | 0.02785935  | 0.031061775 | 0.02385093  |
| ENSG00000127423 | 0.047304788 | 0.041630347 | 0.043199385 | 0.042937306 |
| ENSG00000109920 | 0.023135641 | 0.028793161 | 0.028394829 | 0.023893002 |
| ENSG00000116396 | 0.030378036 | 0.02960433  | 0.029030689 | 0.024574457 |
| ENSG00000186141 | 0.026081486 | 0.030624713 | 0.0322968   | 0.02112306  |
| ENSG00000160396 | 0.016319169 | 0.025213679 | 0.024302132 | 0.015448634 |
| ENSG00000106236 | 0.018829722 | 0.025008362 | 0.025379836 | 0.014796183 |
| ENSG00000171155 | 0.036286854 | 0.038387248 | 0.033468865 | 0.028055012 |
| ENSG00000140939 | 0.03580048  | 0.038019583 | 0.036202991 | 0.036053479 |
| ENSG00000074964 | 0.01970928  | 0.02979497  | 0.029324795 | 0.020338681 |
| ENSG00000130347 | 0.041372048 | 0.04235074  | 0.035577206 | 0.032821163 |
| ENSG00000111640 | 0.019930527 | 0.024688071 | 0.026032629 | 0.018431893 |

|                 |             |             |             |             |
|-----------------|-------------|-------------|-------------|-------------|
| ENSG00000158604 | 0.03187917  | 0.043707915 | 0.042553405 | 0.035237758 |
| ENSG00000174099 | 0.027685258 | 0.030767529 | 0.029733202 | 0.026911963 |
| ENSG00000165309 | 0.018919154 | 0.026437963 | 0.027739301 | 0.017968715 |
| ENSG00000169926 | 0.023657734 | 0.036073009 | 0.033715414 | 0.021570314 |
| ENSG00000236699 | 0.016042437 | 0.02488277  | 0.025396511 | 0.014886473 |
| ENSG00000174942 | 0.015955474 | 0.025601877 | 0.026300242 | 0.015312713 |
| ENSG00000083520 | 0.018855631 | 0.02602633  | 0.025242301 | 0.016637059 |
| ENSG00000147118 | 0.026123841 | 0.032789607 | 0.03093425  | 0.029647082 |
| ENSG00000185798 | 0.027656188 | 0.035176743 | 0.037255101 | 0.024930808 |
| ENSG00000168589 | 0.028134707 | 0.027646531 | 0.026338313 | 0.024084111 |
| ENSG00000123643 | 0.016436601 | 0.025505177 | 0.02441509  | 0.014910152 |
| ENSG00000184985 | 0.015318612 | 0.025006548 | 0.025091746 | 0.01566457  |
| ENSG00000127314 | 0.022140428 | 0.032289959 | 0.030296684 | 0.024774662 |
| ENSG00000158092 | 0.029615379 | 0.034258287 | 0.032922329 | 0.027161265 |
| ENSG00000187634 | 0.019489237 | 0.026284373 | 0.029437702 | 0.016007208 |
| ENSG00000197826 | 0.029213083 | 0.032308076 | 0.027172101 | 0.023375237 |
| ENSG00000164675 | 0.01655661  | 0.025449234 | 0.025015663 | 0.014322023 |
| ENSG00000126106 | 0.027288795 | 0.03131333  | 0.031966374 | 0.023989706 |
| ENSG00000137497 | 0.021479704 | 0.029165414 | 0.031066533 | 0.023935848 |
| ENSG00000204356 | 0.028559252 | 0.030827634 | 0.032021965 | 0.021424966 |
| ENSG00000149308 | 0.027410953 | 0.03669774  | 0.031418963 | 0.032335344 |
| ENSG00000165632 | 0.01619289  | 0.024494629 | 0.024151677 | 0.016096069 |
| ENSG00000133742 | 0.015930394 | 0.024624283 | 0.025091215 | 0.016073746 |
| ENSG00000204344 | 0.021691677 | 0.02960645  | 0.036408701 | 0.022079414 |
| ENSG00000149792 | 0.02245149  | 0.027941608 | 0.033132145 | 0.021201231 |
| ENSG00000169692 | 0.05812852  | 0.040659225 | 0.039383808 | 0.034930727 |
| ENSG00000160179 | 0.085951615 | 0.059924653 | 0.062735327 | 0.077381515 |
| ENSG00000204262 | 0.045999881 | 0.02811372  | 0.026030741 | 0.029911854 |
| ENSG00000072182 | 0.015397916 | 0.025175814 | 0.024926224 | 0.015314146 |
| ENSG00000111906 | 0.024772351 | 0.030143144 | 0.028717199 | 0.023945714 |
| ENSG00000182040 | 0.020513472 | 0.027744999 | 0.027023217 | 0.026739438 |
| ENSG00000088038 | 0.026357716 | 0.029757041 | 0.042208249 | 0.02650259  |
| ENSG00000170266 | 0.028454509 | 0.033571552 | 0.032855994 | 0.023962217 |
| ENSG00000130287 | 0.022680102 | 0.026201478 | 0.027862676 | 0.017509347 |
| ENSG00000105708 | 0.035718905 | 0.034237699 | 0.035988481 | 0.034221536 |
| ENSG00000036565 | 0.015834705 | 0.024116341 | 0.024168814 | 0.014149675 |
| ENSG00000221858 | 0.014204531 | 0.023865669 | 0.024665915 | 0.015577475 |
| ENSG00000143624 | 0.026647313 | 0.030963606 | 0.029642407 | 0.025982986 |
| ENSG00000204983 | 0.016696178 | 0.024597596 | 0.025090647 | 0.015449365 |
| ENSG00000115946 | 0.043402142 | 0.056078193 | 0.058889829 | 0.053030547 |
| ENSG00000067082 | 0.044294808 | 0.044983724 | 0.046419374 | 0.040791056 |
| ENSG00000164744 | 0.016469371 | 0.026289343 | 0.026491765 | 0.01646232  |
| ENSG00000120868 | 0.047642758 | 0.055203033 | 0.047614659 | 0.038881167 |
| ENSG00000168374 | 0.023106167 | 0.031945018 | 0.037095678 | 0.027130617 |
| ENSG00000089116 | 0.040742492 | 0.039589787 | 0.036143127 | 0.032367018 |
| ENSG00000107317 | 0.01516441  | 0.0250432   | 0.024444102 | 0.015571694 |
| ENSG00000147465 | 0.046687335 | 0.042744321 | 0.039254436 | 0.031917052 |
| ENSG00000116478 | 0.024155316 | 0.032106861 | 0.029268054 | 0.02068823  |
| ENSG00000138160 | 0.045264359 | 0.038925177 | 0.040060092 | 0.038668663 |
| ENSG00000163472 | 0.032665023 | 0.039801731 | 0.037890498 | 0.027555156 |
| ENSG00000142655 | 0.024313131 | 0.028425215 | 0.036152561 | 0.024110178 |
| ENSG00000147262 | 0.017162661 | 0.024753241 | 0.025029855 | 0.015341271 |
| ENSG00000179934 | 0.033489365 | 0.032768606 | 0.039566851 | 0.024022478 |
| ENSG00000171345 | 0.015527362 | 0.024500491 | 0.024650121 | 0.014746655 |

|                 |             |             |             |             |
|-----------------|-------------|-------------|-------------|-------------|
| ENSG00000109610 | 0.017096633 | 0.025438931 | 0.025283313 | 0.016764037 |
| ENSG00000180535 | 0.016720172 | 0.024730323 | 0.024807945 | 0.016190137 |
| ENSG00000110675 | 0.016708506 | 0.025750151 | 0.024929813 | 0.015548815 |
| ENSG00000105583 | 0.019247502 | 0.026937254 | 0.027753805 | 0.018278581 |
| ENSG00000158865 | 0.016212764 | 0.025300235 | 0.026166377 | 0.01407249  |
| ENSG00000157654 | 0.039247435 | 0.04167764  | 0.037315394 | 0.038304428 |
| ENSG00000062485 | 0.021320472 | 0.027363344 | 0.02806065  | 0.02183061  |
| ENSG00000114268 | 0.105940787 | 0.052542863 | 0.050908546 | 0.057798044 |
| ENSG00000177455 | 0.02840635  | 0.032917413 | 0.034045752 | 0.031760329 |
| ENSG00000120942 | 0.038311386 | 0.03962886  | 0.044108706 | 0.042125475 |
| ENSG00000106819 | 0.021377087 | 0.024443264 | 0.025991267 | 0.021417371 |
| ENSG00000233838 | 0.022411446 | 0.028425114 | 0.026690963 | 0.019414368 |
| ENSG00000012232 | 0.024491648 | 0.031825829 | 0.032465739 | 0.025706873 |
| ENSG00000057468 | 0.021992954 | 0.027022656 | 0.030960563 | 0.019348962 |
| ENSG00000135736 | 0.047718693 | 0.048328806 | 0.056172869 | 0.05147274  |
| ENSG00000157150 | 0.016072862 | 0.025555136 | 0.025053593 | 0.015698175 |
| ENSG00000081237 | 0.017002195 | 0.025674866 | 0.025721249 | 0.015252334 |
| ENSG00000204613 | 0.015352276 | 0.025726297 | 0.024929821 | 0.015303721 |
| ENSG00000168916 | 0.083385279 | 0.080623212 | 0.064439905 | 0.0737595   |
| ENSG00000184507 | 0.013463018 | 0.024172767 | 0.023663267 | 0.013547695 |
| ENSG00000124444 | 0.028556891 | 0.030754861 | 0.035128134 | 0.031153899 |
| ENSG00000160710 | 0.020923721 | 0.028254932 | 0.028268818 | 0.018133483 |
| ENSG00000221836 | 0.01319677  | 0.023872236 | 0.023665055 | 0.013274551 |
| ENSG00000138823 | 0.109097439 | 0.079372875 | 0.069785376 | 0.075720602 |
| ENSG00000106701 | 0.038422006 | 0.027438865 | 0.034230035 | 0.0298217   |
| ENSG00000056345 | 0.038974841 | 0.04040497  | 0.040585018 | 0.043519836 |
| ENSG00000140319 | 0.016926738 | 0.026383578 | 0.025727133 | 0.018270374 |
| ENSG00000071243 | 0.059041944 | 0.063164512 | 0.070626347 | 0.05769572  |
| ENSG00000115596 | 0.017537335 | 0.026523368 | 0.025701605 | 0.017525789 |
| ENSG00000165953 | 0.017435325 | 0.025927306 | 0.024700487 | 0.015729122 |
| ENSG00000107186 | 0.018273715 | 0.026278299 | 0.027809712 | 0.015935432 |
| ENSG00000164691 | 0.066503138 | 0.05336021  | 0.05365503  | 0.042744013 |
| ENSG00000113520 | 0.030089254 | 0.038936153 | 0.037127306 | 0.036341265 |
| ENSG00000183579 | 0.014824831 | 0.0248771   | 0.024077796 | 0.015286094 |
| ENSG00000103196 | 0.029003131 | 0.025450483 | 0.024307215 | 0.015236736 |
| ENSG00000173692 | 0.029120922 | 0.036345452 | 0.029770081 | 0.035679224 |
| ENSG00000152213 | 0.015217474 | 0.026710451 | 0.025478009 | 0.01629457  |
| ENSG00000139540 | 0.016691963 | 0.025985707 | 0.025261212 | 0.014697676 |
| ENSG00000184436 | 0.024705207 | 0.028872872 | 0.036730694 | 0.023406187 |
| ENSG00000213977 | 0.039888152 | 0.033993859 | 0.035674635 | 0.039843204 |
| ENSG00000114450 | 0.040081807 | 0.03855042  | 0.03732765  | 0.05192253  |
| ENSG00000213930 | 0.039118563 | 0.040456237 | 0.033223742 | 0.03469516  |
| ENSG00000136206 | 0.015989663 | 0.025477081 | 0.024737136 | 0.01732226  |
| ENSG00000090971 | 0.036601131 | 0.034454294 | 0.033912722 | 0.031644092 |
| ENSG00000196406 | 0.033879243 | 0.026897952 | 0.025389705 | 0.017121397 |
| ENSG00000137040 | 0.041198945 | 0.043654017 | 0.043771556 | 0.041987611 |
| ENSG00000164841 | 0.018336705 | 0.026441695 | 0.026536303 | 0.017423163 |
| ENSG00000137364 | 0.037883113 | 0.029399762 | 0.034623408 | 0.031096849 |
| ENSG00000140488 | 0.0243659   | 0.02927819  | 0.026988962 | 0.022604868 |
| ENSG00000196104 | 0.01664948  | 0.024974718 | 0.026039515 | 0.017075248 |
| ENSG00000164442 | 0.060473719 | 0.056477895 | 0.048520763 | 0.052844284 |
| ENSG00000198178 | 0.046517367 | 0.042459639 | 0.040911313 | 0.058109908 |
| ENSG00000120889 | 0.032539907 | 0.035571646 | 0.03398235  | 0.028697746 |
| ENSG00000236104 | 0.024915722 | 0.031508786 | 0.035510273 | 0.024146372 |

|                 |             |             |             |             |
|-----------------|-------------|-------------|-------------|-------------|
| ENSG00000179041 | 0.042481067 | 0.041611588 | 0.046654321 | 0.046736888 |
| ENSG00000155984 | 0.027825965 | 0.040355373 | 0.036686636 | 0.036213074 |
| ENSG00000103404 | 0.016891558 | 0.025337867 | 0.025352651 | 0.015525379 |
| ENSG00000164822 | 0.015378373 | 0.025231485 | 0.02539988  | 0.01516099  |
| ENSG00000204977 | 0.026564276 | 0.031957069 | 0.031309113 | 0.026619716 |
| ENSG00000169992 | 0.017402606 | 0.027084009 | 0.028121783 | 0.017937835 |
| ENSG00000132874 | 0.015214506 | 0.02534517  | 0.026156389 | 0.01630103  |
| ENSG00000168591 | 0.018510193 | 0.029172189 | 0.031691837 | 0.018550802 |
| ENSG00000108433 | 0.03607718  | 0.040193329 | 0.036222753 | 0.032448368 |
| ENSG00000162068 | 0.014890305 | 0.026148485 | 0.025557813 | 0.015685051 |
| ENSG00000158411 | 0.031875053 | 0.032806477 | 0.031090948 | 0.022008493 |
| ENSG00000101166 | 0.026879311 | 0.03157267  | 0.030576854 | 0.022178583 |
| ENSG00000116918 | 0.029817307 | 0.038839339 | 0.034619589 | 0.031622802 |
| ENSG00000085871 | 0.075276408 | 0.068743433 | 0.067695225 | 0.058927342 |
| ENSG00000197701 | 0.018025979 | 0.024400081 | 0.02581886  | 0.017318913 |
| ENSG00000122435 | 0.034704695 | 0.038791971 | 0.030736967 | 0.024043644 |
| ENSG00000146221 | 0.015454134 | 0.02551214  | 0.02692033  | 0.016304064 |
| ENSG00000183309 | 0.029363443 | 0.032271414 | 0.029662985 | 0.030736447 |
| ENSG00000011332 | 0.022787612 | 0.025965326 | 0.027003837 | 0.018797167 |
| ENSG00000105438 | 0.02903634  | 0.031624127 | 0.035829388 | 0.028225075 |
| ENSG00000176261 | 0.023315425 | 0.030543167 | 0.03137128  | 0.021065609 |
| ENSG00000171307 | 0.017207011 | 0.025272956 | 0.025990966 | 0.017470393 |
| ENSG00000105372 | 0.014417147 | 0.023949402 | 0.023938248 | 0.015485454 |
| ENSG00000100596 | 0.037163654 | 0.04185952  | 0.034567504 | 0.041096952 |
| ENSG00000179023 | 0.020036227 | 0.02869548  | 0.028716914 | 0.018739607 |
| ENSG00000140873 | 0.019310205 | 0.027108686 | 0.026349631 | 0.018763924 |
| ENSG00000107537 | 0.049736068 | 0.045799704 | 0.048673035 | 0.060213738 |
| ENSG00000134193 | 0.015431676 | 0.02439215  | 0.024885222 | 0.01424776  |
| ENSG00000099889 | 0.017793762 | 0.02639914  | 0.027143491 | 0.01694463  |
| ENSG00000161849 | 0.018037073 | 0.028385174 | 0.026484164 | 0.018477339 |
| ENSG00000129460 | 0.026995301 | 0.034917836 | 0.034157366 | 0.022030996 |
| ENSG00000072952 | 0.016562256 | 0.024081622 | 0.02427254  | 0.015022096 |
| ENSG00000198954 | 0.036250926 | 0.040154878 | 0.035220142 | 0.037344936 |
| ENSG00000154079 | 0.034539511 | 0.031025445 | 0.034244591 | 0.029502976 |
| ENSG00000144029 | 0.027876985 | 0.031548158 | 0.028684423 | 0.020644238 |
| ENSG00000149761 | 0.029547618 | 0.031110647 | 0.030697929 | 0.031321555 |
| ENSG00000101057 | 0.044532772 | 0.04194003  | 0.044024202 | 0.042688939 |
| ENSG00000114744 | 0.029818744 | 0.038274374 | 0.03034626  | 0.042390523 |
| ENSG00000139629 | 0.041741726 | 0.044197243 | 0.047546282 | 0.042101263 |
| ENSG00000113657 | 0.080081961 | 0.061264774 | 0.041912514 | 0.095395438 |
| ENSG00000007545 | 0.020311189 | 0.02932081  | 0.028600195 | 0.017796921 |
| ENSG00000163485 | 0.017629533 | 0.024933857 | 0.025123846 | 0.016404156 |
| ENSG00000176783 | 0.026523773 | 0.034549461 | 0.03344586  | 0.024164933 |
| ENSG00000022840 | 0.03772159  | 0.039464096 | 0.045562673 | 0.032548246 |
| ENSG00000106733 | 0.050677692 | 0.050435614 | 0.052696984 | 0.03641857  |
| ENSG00000161558 | 0.028938818 | 0.035605587 | 0.035977929 | 0.025601751 |
| ENSG00000135506 | 0.026431104 | 0.029153854 | 0.036930204 | 0.027141169 |
| ENSG00000144524 | 0.023704417 | 0.028174777 | 0.032891131 | 0.022113378 |
| ENSG00000196227 | 0.032952824 | 0.032461232 | 0.033306432 | 0.02924042  |
| ENSG00000166948 | 0.01595133  | 0.025876921 | 0.025694608 | 0.015277382 |
| ENSG00000172493 | 0.031541446 | 0.033634636 | 0.030255108 | 0.027079043 |
| ENSG00000164919 | 0.01724412  | 0.026564738 | 0.025000278 | 0.018005196 |
| ENSG00000124900 | 0.017280339 | 0.024688653 | 0.024792095 | 0.015845598 |
| ENSG00000171813 | 0.056607653 | 0.066675375 | 0.056511977 | 0.06266469  |

|                 |             |             |             |             |
|-----------------|-------------|-------------|-------------|-------------|
| ENSG00000177764 | 0.025458644 | 0.033522299 | 0.034352341 | 0.023946355 |
| ENSG00000076003 | 0.047844861 | 0.039697782 | 0.039422281 | 0.0483257   |
| ENSG00000177000 | 0.019138189 | 0.027958922 | 0.024867725 | 0.016355019 |
| ENSG00000113327 | 0.01828939  | 0.028312146 | 0.02711072  | 0.016722677 |
| ENSG00000204539 | 0.015415583 | 0.024482106 | 0.025200014 | 0.015032822 |
| ENSG00000160180 | 0.015802399 | 0.025689195 | 0.025132595 | 0.015904494 |
| ENSG00000152944 | 0.032476308 | 0.036937535 | 0.032614063 | 0.033344959 |
| ENSG00000130294 | 0.016083222 | 0.025392876 | 0.025150631 | 0.016139203 |
| ENSG00000115252 | 0.01634811  | 0.026053644 | 0.025576623 | 0.016455332 |
| ENSG00000134762 | 0.110542482 | 0.046781707 | 0.027659207 | 0.072725519 |
| ENSG00000168395 | 0.040397858 | 0.042716989 | 0.04625103  | 0.036182599 |
| ENSG00000154380 | 0.015461626 | 0.024933228 | 0.024661021 | 0.015159032 |
| ENSG00000187135 | 0.017411562 | 0.025094507 | 0.024220762 | 0.016400646 |
| ENSG00000111732 | 0.044903337 | 0.04652518  | 0.041552437 | 0.049300609 |
| ENSG00000169071 | 0.031761574 | 0.029323526 | 0.025961863 | 0.054329479 |
| ENSG00000172992 | 0.030860768 | 0.030186408 | 0.030036881 | 0.026709937 |
| ENSG00000116001 | 0.030159087 | 0.039404311 | 0.034134369 | 0.02719716  |
| ENSG00000106948 | 0.032710583 | 0.031158749 | 0.033422849 | 0.030823968 |
| ENSG00000124228 | 0.029246688 | 0.028369126 | 0.03177501  | 0.031663913 |
| ENSG00000173540 | 0.038210972 | 0.03586005  | 0.03177245  | 0.035616267 |
| ENSG00000135245 | 0.125618646 | 0.102135458 | 0.129898033 | 0.122455584 |
| ENSG00000090661 | 0.026623726 | 0.034616877 | 0.029439304 | 0.031653003 |
| ENSG00000169955 | 0.019449607 | 0.025405032 | 0.025716462 | 0.018270572 |
| ENSG00000100605 | 0.046345144 | 0.044700296 | 0.040325301 | 0.047954131 |
| ENSG00000165424 | 0.026791242 | 0.031838228 | 0.033191731 | 0.027106233 |
| ENSG00000128313 | 0.016047139 | 0.025157956 | 0.024811295 | 0.015375084 |
| ENSG00000170820 | 0.015604901 | 0.025032287 | 0.024600621 | 0.015139944 |
| ENSG00000227500 | 0.031305501 | 0.035629696 | 0.043937051 | 0.034054938 |
| ENSG00000130035 | 0.019199498 | 0.02613976  | 0.025782648 | 0.016651657 |
| ENSG00000163507 | 0.047536475 | 0.047431235 | 0.035457715 | 0.04312769  |
| ENSG00000248871 | 0.047094264 | 0.045364419 | 0.036837502 | 0.045317571 |
| ENSG00000106692 | 0.029327037 | 0.033228892 | 0.02895591  | 0.023468947 |
| ENSG00000011405 | 0.03540636  | 0.04670212  | 0.039853454 | 0.037819998 |
| ENSG00000162419 | 0.029394336 | 0.030589124 | 0.035965666 | 0.027209716 |
| ENSG00000091262 | 0.014953118 | 0.023962047 | 0.024074382 | 0.014428525 |
| ENSG00000100065 | 0.017120662 | 0.024381343 | 0.024329676 | 0.01534773  |
| ENSG00000154118 | 0.015906132 | 0.025445736 | 0.023846065 | 0.014617675 |
| ENSG00000163874 | 0.027421273 | 0.040303561 | 0.041287961 | 0.031655304 |
| ENSG00000197798 | 0.018856763 | 0.027208857 | 0.02788596  | 0.021279161 |
| ENSG00000148737 | 0.018264546 | 0.026233625 | 0.026198752 | 0.015869633 |
| ENSG00000139832 | 0.091465551 | 0.071643988 | 0.056991886 | 0.071356561 |
| ENSG00000158467 | 0.038478488 | 0.037743145 | 0.032200378 | 0.032558564 |
| ENSG00000101608 | 0.018958968 | 0.028002676 | 0.026728496 | 0.019813185 |
| ENSG00000198900 | 0.027913547 | 0.036388821 | 0.031055852 | 0.030317171 |
| ENSG00000108107 | 0.035240134 | 0.03648889  | 0.03374285  | 0.043895366 |
| ENSG00000168447 | 0.038426006 | 0.045906272 | 0.035326784 | 0.04826442  |
| ENSG00000140932 | 0.014700784 | 0.025452576 | 0.024488192 | 0.014987096 |
| ENSG00000168175 | 0.027102395 | 0.036676015 | 0.032599644 | 0.026632974 |
| ENSG00000167996 | 0.020179353 | 0.02719613  | 0.025868071 | 0.02035705  |
| ENSG00000124743 | 0.015990024 | 0.025314853 | 0.024795477 | 0.015621277 |
| ENSG00000126003 | 0.034365973 | 0.038020253 | 0.043860088 | 0.033093727 |
| ENSG00000064419 | 0.026870903 | 0.032272342 | 0.032224248 | 0.022378881 |
| ENSG00000198894 | 0.035628697 | 0.040997327 | 0.040264997 | 0.033832382 |
| ENSG00000198929 | 0.016137252 | 0.024618664 | 0.024891665 | 0.01566407  |

|                 |             |             |             |             |
|-----------------|-------------|-------------|-------------|-------------|
| ENSG00000114455 | 0.038539973 | 0.032402617 | 0.030247408 | 0.02058488  |
| ENSG00000106178 | 0.017052895 | 0.025712213 | 0.024501679 | 0.016830556 |
| ENSG00000005882 | 0.019124179 | 0.027740151 | 0.02590448  | 0.018033691 |
| ENSG00000242689 | 0.01615246  | 0.024818858 | 0.023790509 | 0.015639062 |
| ENSG00000050767 | 0.021426759 | 0.028877072 | 0.028550519 | 0.018825766 |
| ENSG00000113555 | 0.015890344 | 0.025118215 | 0.025182995 | 0.014263231 |
| ENSG00000121039 | 0.017083774 | 0.02516812  | 0.025625848 | 0.016308963 |
| ENSG00000196248 | 0.014421471 | 0.02449045  | 0.024481098 | 0.016005458 |
| ENSG00000159915 | 0.04746289  | 0.039026211 | 0.03173871  | 0.028637724 |
| ENSG00000243646 | 0.027124625 | 0.031967103 | 0.03169179  | 0.024821959 |
| ENSG00000068697 | 0.024420607 | 0.031705195 | 0.033880543 | 0.025442942 |
| ENSG00000146909 | 0.03042815  | 0.030301436 | 0.033145187 | 0.022154018 |
| ENSG00000142102 | 0.050393393 | 0.058476939 | 0.056537076 | 0.056693211 |
| ENSG00000172331 | 0.039838727 | 0.047097823 | 0.038897736 | 0.038721774 |
| ENSG00000148248 | 0.026808051 | 0.03125831  | 0.037738839 | 0.028344275 |
| ENSG00000156103 | 0.016461642 | 0.025399832 | 0.025459972 | 0.016171165 |
| ENSG00000089876 | 0.048834061 | 0.037319238 | 0.037695416 | 0.0321184   |
| ENSG00000196277 | 0.017180128 | 0.025399949 | 0.024985188 | 0.01730888  |
| ENSG00000114739 | 0.048885428 | 0.046696221 | 0.041140657 | 0.04053965  |
| ENSG00000148156 | 0.015492223 | 0.024990349 | 0.024925521 | 0.014710141 |
| ENSG00000142634 | 0.030268077 | 0.034665157 | 0.032352922 | 0.032035733 |
| ENSG00000173198 | 0.046411886 | 0.04376784  | 0.045865882 | 0.049095613 |
| ENSG00000243943 | 0.031418502 | 0.037782153 | 0.031945298 | 0.027499115 |
| ENSG00000116406 | 0.04396973  | 0.041582632 | 0.038046715 | 0.046909039 |
| ENSG00000163069 | 0.055538528 | 0.056130395 | 0.049323877 | 0.050339679 |
| ENSG00000173575 | 0.01860427  | 0.026081874 | 0.025826843 | 0.018518427 |
| ENSG00000112195 | 0.052481692 | 0.039314469 | 0.033504511 | 0.04463224  |
| ENSG00000163872 | 0.048037459 | 0.051693921 | 0.051672593 | 0.045908426 |
| ENSG00000089127 | 0.077197293 | 0.07735364  | 0.051659084 | 0.107739648 |
| ENSG00000172590 | 0.047238944 | 0.047662791 | 0.040793948 | 0.035603625 |
| ENSG00000112773 | 0.121961001 | 0.078919378 | 0.066682937 | 0.090832616 |
| ENSG00000239704 | 0.058574272 | 0.047732478 | 0.057297376 | 0.065076825 |
| ENSG00000123416 | 0.020419238 | 0.026139161 | 0.025128688 | 0.021286139 |
| ENSG00000100490 | 0.019779551 | 0.027250942 | 0.027469551 | 0.017475059 |
| ENSG00000160685 | 0.023543257 | 0.03244025  | 0.028964997 | 0.025426072 |
| ENSG00000088448 | 0.037925382 | 0.03807028  | 0.035731386 | 0.032365236 |
| ENSG00000053108 | 0.017355448 | 0.025506426 | 0.025897787 | 0.016082437 |
| ENSG00000053918 | 0.014924454 | 0.025769288 | 0.024822565 | 0.014457943 |
| ENSG00000166557 | 0.028547174 | 0.03340721  | 0.034210517 | 0.028578736 |
| ENSG00000115350 | 0.033875379 | 0.030102848 | 0.035824174 | 0.030690186 |
| ENSG00000117602 | 0.033135788 | 0.030668651 | 0.028027021 | 0.024094879 |
| ENSG00000118785 | 0.026118316 | 0.03337916  | 0.033889817 | 0.022848431 |
| ENSG00000189184 | 0.027740389 | 0.02515829  | 0.025153023 | 0.017887325 |
| ENSG00000089775 | 0.045572663 | 0.042679612 | 0.044455069 | 0.047629226 |
| ENSG00000120697 | 0.027313843 | 0.031472134 | 0.033422619 | 0.027033866 |
| ENSG00000188425 | 0.017677652 | 0.024632644 | 0.02607292  | 0.01489523  |
| ENSG00000140481 | 0.019268197 | 0.025736661 | 0.025945166 | 0.019022138 |
| ENSG00000165752 | 0.0478231   | 0.052342237 | 0.038406153 | 0.040906434 |
| ENSG00000168843 | 0.034395039 | 0.028758008 | 0.037302106 | 0.019695209 |
| ENSG00000114686 | 0.024345658 | 0.028172193 | 0.027154825 | 0.025414726 |
| ENSG00000007923 | 0.031129136 | 0.032318797 | 0.033500925 | 0.030039141 |
| ENSG00000162600 | 0.037391469 | 0.041057095 | 0.032873727 | 0.032152493 |
| ENSG00000125903 | 0.017798719 | 0.02821322  | 0.027321454 | 0.018543828 |
| ENSG00000110801 | 0.033235594 | 0.040527741 | 0.036136054 | 0.034385737 |

|                 |             |             |             |             |
|-----------------|-------------|-------------|-------------|-------------|
| ENSG00000169193 | 0.047723913 | 0.037715953 | 0.03586144  | 0.035251539 |
| ENSG00000186272 | 0.029270325 | 0.03893259  | 0.041042166 | 0.025630948 |
| ENSG00000110723 | 0.049158964 | 0.051579856 | 0.047646393 | 0.053368932 |
| ENSG00000124098 | 0.030505364 | 0.033806944 | 0.031142969 | 0.026130484 |
| ENSG00000137135 | 0.029120528 | 0.027535249 | 0.028939844 | 0.025134567 |
| ENSG00000100918 | 0.047512683 | 0.045214741 | 0.047096639 | 0.050441595 |
| ENSG00000132972 | 0.038719828 | 0.045125252 | 0.024613361 | 0.039296391 |
| ENSG00000134874 | 0.049052512 | 0.035742519 | 0.027642195 | 0.026097383 |
| ENSG00000253953 | 0.017741688 | 0.025149929 | 0.024123249 | 0.014834955 |
| ENSG00000134321 | 0.03610397  | 0.041206496 | 0.038959715 | 0.035744325 |
| ENSG00000166426 | 0.031583241 | 0.042759749 | 0.026026064 | 0.02343265  |
| ENSG00000133265 | 0.04135742  | 0.033703266 | 0.037072115 | 0.039337428 |
| ENSG00000130713 | 0.025659666 | 0.029611075 | 0.029175379 | 0.02410947  |
| ENSG00000008118 | 0.017004355 | 0.026636255 | 0.024631452 | 0.016702725 |
| ENSG00000163636 | 0.022417355 | 0.029338328 | 0.029055147 | 0.023973338 |
| ENSG00000112561 | 0.032945813 | 0.040171307 | 0.037097832 | 0.03509325  |
| ENSG00000140905 | 0.045054585 | 0.047538899 | 0.038879755 | 0.045463027 |
| ENSG00000197697 | 0.056992398 | 0.06140401  | 0.046080109 | 0.048728549 |
| ENSG00000204186 | 0.034269854 | 0.032244207 | 0.033222865 | 0.025865682 |
| ENSG00000118690 | 0.02012597  | 0.024462579 | 0.026281588 | 0.018444676 |
| ENSG00000177854 | 0.033845754 | 0.034785691 | 0.032721403 | 0.034642758 |
| ENSG00000178802 | 0.039403618 | 0.034767871 | 0.036471157 | 0.034772078 |
| ENSG00000081803 | 0.097921461 | 0.05438271  | 0.043485999 | 0.06706311  |
| ENSG00000101191 | 0.033748254 | 0.037978066 | 0.037382284 | 0.024006334 |
| ENSG00000187268 | 0.016349382 | 0.026040419 | 0.025199518 | 0.015264887 |
| ENSG00000113761 | 0.021011464 | 0.033553179 | 0.03032983  | 0.026111162 |
| ENSG00000068985 | 0.014825568 | 0.024808291 | 0.024138867 | 0.015786525 |
| ENSG00000120688 | 0.030552386 | 0.035725003 | 0.031461464 | 0.028335797 |
| ENSG00000059728 | 0.017983245 | 0.025655423 | 0.026439208 | 0.019080991 |
| ENSG00000133316 | 0.03327396  | 0.032073639 | 0.034835545 | 0.026353751 |
| ENSG00000171234 | 0.115810629 | 0.168429834 | 0.158797566 | 0.098574721 |
| ENSG00000168497 | 0.020298973 | 0.025940174 | 0.025304076 | 0.014787094 |
| ENSG00000150051 | 0.015731385 | 0.025284159 | 0.025331532 | 0.015543477 |
| ENSG00000110031 | 0.025787273 | 0.031656211 | 0.028486879 | 0.022242727 |
| ENSG00000088836 | 0.020716023 | 0.028514357 | 0.025415339 | 0.017094292 |
| ENSG00000133958 | 0.016047155 | 0.025470126 | 0.025319385 | 0.015183154 |
| ENSG00000109501 | 0.036035356 | 0.030873345 | 0.03123718  | 0.029637214 |
| ENSG00000157542 | 0.014277913 | 0.024927692 | 0.024815051 | 0.016137877 |
| ENSG00000169933 | 0.016975101 | 0.024789824 | 0.024626794 | 0.015630307 |
| ENSG00000162882 | 0.030099386 | 0.030404843 | 0.027584501 | 0.025406904 |
| ENSG00000178163 | 0.039462852 | 0.045889367 | 0.042051006 | 0.036334478 |
| ENSG00000177425 | 0.050934286 | 0.043244007 | 0.033642884 | 0.040218712 |
| ENSG00000177034 | 0.020627519 | 0.025307744 | 0.026595274 | 0.016082714 |
| ENSG00000136928 | 0.015515106 | 0.026071214 | 0.024831729 | 0.015122165 |
| ENSG00000164326 | 0.018271659 | 0.024960382 | 0.024610665 | 0.01762437  |
| ENSG00000106591 | 0.028236699 | 0.032876313 | 0.031511043 | 0.023067277 |
| ENSG00000138814 | 0.03659925  | 0.048279378 | 0.037791175 | 0.033646473 |
| ENSG00000075240 | 0.051090139 | 0.041226663 | 0.034908934 | 0.03686221  |
| ENSG00000167780 | 0.031635745 | 0.032191128 | 0.031797006 | 0.024591568 |
| ENSG00000198327 | 0.023674988 | 0.028034382 | 0.029455215 | 0.020763479 |
| ENSG00000159409 | 0.015215914 | 0.025036869 | 0.025095803 | 0.015911135 |
| ENSG00000102034 | 0.024497403 | 0.031079488 | 0.037251457 | 0.02383874  |
| ENSG00000002933 | 0.050777544 | 0.02616946  | 0.025022348 | 0.016930221 |
| ENSG00000163440 | 0.015768032 | 0.026264377 | 0.02496036  | 0.015174649 |

|                 |             |             |             |             |
|-----------------|-------------|-------------|-------------|-------------|
| ENSG00000172554 | 0.025512624 | 0.026564929 | 0.025261331 | 0.024297967 |
| ENSG00000196455 | 0.026029741 | 0.03526257  | 0.030685973 | 0.022502622 |
| ENSG00000186575 | 0.016659106 | 0.028991643 | 0.024911436 | 0.017065754 |
| ENSG00000132849 | 0.019766683 | 0.029265048 | 0.029744292 | 0.019432856 |
| ENSG00000110651 | 0.026124334 | 0.030200571 | 0.030311426 | 0.021225305 |
| ENSG00000162378 | 0.034457683 | 0.038239185 | 0.03281636  | 0.027476424 |
| ENSG00000149798 | 0.041889878 | 0.04189714  | 0.044574582 | 0.044008802 |
| ENSG00000155463 | 0.021376518 | 0.028225563 | 0.028211576 | 0.019144053 |
| ENSG00000166407 | 0.016890507 | 0.025495224 | 0.026150068 | 0.016625579 |
| ENSG00000144566 | 0.021821073 | 0.032016    | 0.034885577 | 0.022625671 |
| ENSG00000116984 | 0.02608131  | 0.03154511  | 0.031598327 | 0.028563958 |
| ENSG00000145626 | 0.016386326 | 0.024339698 | 0.024802144 | 0.015681355 |
| ENSG00000101189 | 0.032993647 | 0.039221409 | 0.033667041 | 0.023322653 |
| ENSG00000002549 | 0.027083382 | 0.032087557 | 0.029420228 | 0.021733335 |
| ENSG00000183153 | 0.017574608 | 0.026305113 | 0.026659966 | 0.016173554 |
| ENSG00000162878 | 0.030362611 | 0.025287979 | 0.02553385  | 0.018314916 |
| ENSG00000099308 | 0.033713438 | 0.035476297 | 0.036324586 | 0.034967738 |
| ENSG00000117528 | 0.038173904 | 0.044618799 | 0.035055957 | 0.029103131 |
| ENSG00000196368 | 0.014781059 | 0.024975817 | 0.02445334  | 0.015690799 |
| ENSG00000127863 | 0.164508146 | 0.143665963 | 0.122629797 | 0.155995293 |
| ENSG00000059122 | 0.024300919 | 0.032362123 | 0.033664807 | 0.027228115 |
| ENSG00000173825 | 0.014862909 | 0.024824227 | 0.025603582 | 0.015670997 |
| ENSG00000169239 | 0.046334295 | 0.037672088 | 0.041369715 | 0.039695464 |
| ENSG00000186431 | 0.032709106 | 0.032902046 | 0.038741067 | 0.031090741 |
| ENSG00000196981 | 0.01968064  | 0.028381826 | 0.026015997 | 0.017240049 |
| ENSG00000170634 | 0.01890644  | 0.025412196 | 0.02538746  | 0.016938779 |
| ENSG00000172831 | 0.027894218 | 0.028753365 | 0.032748412 | 0.022358403 |
| ENSG00000184697 | 0.017561725 | 0.026850878 | 0.027096974 | 0.019220308 |
| ENSG00000203690 | 0.015271733 | 0.024512271 | 0.025512573 | 0.014243129 |
| ENSG00000173110 | 0.071807263 | 0.080257054 | 0.061033895 | 0.076151226 |
| ENSG00000133943 | 0.032520617 | 0.039809574 | 0.034702377 | 0.036853274 |
| ENSG00000154839 | 0.047748623 | 0.038032114 | 0.037053791 | 0.036106135 |
| ENSG00000170469 | 0.028982728 | 0.033352371 | 0.0293757   | 0.035059136 |
| ENSG00000170231 | 0.077142349 | 0.061986451 | 0.046493211 | 0.05718678  |
| ENSG00000109674 | 0.033813678 | 0.033495521 | 0.029140683 | 0.02405288  |
| ENSG00000170615 | 0.018792488 | 0.026399953 | 0.025553913 | 0.017490111 |
| ENSG00000163581 | 0.036226307 | 0.025527513 | 0.025855196 | 0.015122594 |
| ENSG00000196693 | 0.043158116 | 0.040210279 | 0.033266501 | 0.038667453 |
| ENSG00000162889 | 0.029378797 | 0.039386479 | 0.048445099 | 0.032695612 |
| ENSG00000188566 | 0.0410583   | 0.039665335 | 0.031747534 | 0.031246125 |
| ENSG00000242520 | 0.01477592  | 0.025045044 | 0.024141937 | 0.014887498 |
| ENSG00000165716 | 0.102475185 | 0.105091992 | 0.068585548 | 0.071034811 |
| ENSG00000108298 | 0.013382362 | 0.023441205 | 0.023728891 | 0.014118253 |
| ENSG00000177710 | 0.014986838 | 0.024885331 | 0.024448981 | 0.014390068 |
| ENSG00000172840 | 0.020593404 | 0.027834139 | 0.026865214 | 0.019466983 |
| ENSG00000142686 | 0.028855129 | 0.034149264 | 0.034552894 | 0.028170282 |
| ENSG00000105221 | 0.025904159 | 0.047996113 | 0.034260615 | 0.040071441 |
| ENSG00000205808 | 0.037495838 | 0.036299676 | 0.031523904 | 0.027595516 |
| ENSG00000165471 | 0.01681822  | 0.025664943 | 0.026811611 | 0.016279206 |
| ENSG00000101882 | 0.026116874 | 0.031774045 | 0.030701022 | 0.021583831 |
| ENSG00000234560 | 0.019819999 | 0.026008543 | 0.025604069 | 0.01761636  |
| ENSG00000151176 | 0.036209821 | 0.034129751 | 0.030985827 | 0.042459611 |
| ENSG00000117289 | 0.06333762  | 0.082617193 | 0.065887458 | 0.06671446  |
| ENSG00000242852 | 0.02048182  | 0.027499403 | 0.026346229 | 0.017435132 |



|                 |             |             |             |             |
|-----------------|-------------|-------------|-------------|-------------|
| ENSG00000206579 | 0.058926949 | 0.045911027 | 0.027292788 | 0.033089902 |
| ENSG00000184351 | 0.0158714   | 0.026042079 | 0.024552094 | 0.017796895 |
| ENSG00000166073 | 0.016013485 | 0.02521459  | 0.025969512 | 0.015006044 |
| ENSG00000174917 | 0.022982388 | 0.02733807  | 0.02758085  | 0.020275649 |
| ENSG00000197893 | 0.015554096 | 0.025736565 | 0.024938686 | 0.015076002 |
| ENSG00000106631 | 0.016244264 | 0.024533083 | 0.025152594 | 0.016343753 |
| ENSG00000124107 | 0.042139659 | 0.046470304 | 0.024855812 | 0.025917877 |
| ENSG00000102786 | 0.032976116 | 0.03748861  | 0.036514164 | 0.036697589 |
| ENSG00000174444 | 0.0141917   | 0.0242539   | 0.024109554 | 0.015031322 |
| ENSG00000113946 | 0.047124583 | 0.027058275 | 0.026230002 | 0.019735213 |
| ENSG00000170653 | 0.015168873 | 0.025154794 | 0.025223185 | 0.01519726  |
| ENSG00000090097 | 0.031214414 | 0.037893966 | 0.034932729 | 0.032449014 |
| ENSG00000115828 | 0.078718988 | 0.046038984 | 0.056802392 | 0.063216041 |
| ENSG00000106785 | 0.01969245  | 0.026724138 | 0.026989074 | 0.018364596 |
| ENSG00000139797 | 0.016581243 | 0.025021376 | 0.025306291 | 0.015472471 |
| ENSG00000165259 | 0.041704517 | 0.043339874 | 0.034764044 | 0.030416901 |
| ENSG00000105251 | 0.016978739 | 0.025442384 | 0.025445575 | 0.016954824 |
| ENSG00000171953 | 0.020608379 | 0.029659083 | 0.033526077 | 0.026489223 |
| ENSG00000166748 | 0.015491761 | 0.024832985 | 0.024031402 | 0.013917448 |
| ENSG00000176769 | 0.015334641 | 0.024962216 | 0.025288593 | 0.026279089 |
| ENSG00000145416 | 0.046449452 | 0.060090559 | 0.045813807 | 0.047906147 |
| ENSG00000176834 | 0.017731538 | 0.026784128 | 0.025030978 | 0.016783194 |
| ENSG00000102984 | 0.02998677  | 0.027887625 | 0.031356036 | 0.032119983 |
| ENSG00000162607 | 0.0438659   | 0.037768011 | 0.036253472 | 0.037548534 |
| ENSG00000125820 | 0.016746245 | 0.025993786 | 0.025339623 | 0.01557703  |
| ENSG00000102897 | 0.029242605 | 0.035237789 | 0.032771233 | 0.023829359 |
| ENSG00000158825 | 0.071959923 | 0.083687474 | 0.102732354 | 0.079934443 |
| ENSG00000135077 | 0.126704407 | 0.069897791 | 0.074291057 | 0.092940323 |
| ENSG00000125868 | 0.040627705 | 0.042280251 | 0.036491451 | 0.037347373 |
| ENSG00000031823 | 0.021430093 | 0.027229186 | 0.032323296 | 0.0222114   |
| ENSG00000169715 | 0.015485964 | 0.026601162 | 0.025334463 | 0.014309416 |
| ENSG00000160207 | 0.019150865 | 0.028073601 | 0.026539824 | 0.020981389 |
| ENSG00000146147 | 0.015226943 | 0.025280303 | 0.024287391 | 0.015328932 |
| ENSG00000239857 | 0.026455948 | 0.034234371 | 0.036420525 | 0.026478977 |
| ENSG00000184967 | 0.028196895 | 0.029553484 | 0.032366191 | 0.03219529  |
| ENSG00000137878 | 0.035744353 | 0.042192121 | 0.036399913 | 0.02810896  |
| ENSG00000156162 | 0.036262866 | 0.039795996 | 0.034352975 | 0.037915619 |
| ENSG00000186306 | 0.016518523 | 0.024788163 | 0.024500814 | 0.015731779 |
| ENSG00000141750 | 0.019754563 | 0.02906026  | 0.025110824 | 0.018344896 |
| ENSG00000134248 | 0.021203307 | 0.027006721 | 0.027083855 | 0.018583912 |
| ENSG00000169760 | 0.015692621 | 0.024129754 | 0.025290751 | 0.01613615  |
| ENSG00000136999 | 0.062447238 | 0.03264418  | 0.026255278 | 0.027795456 |
| ENSG00000173465 | 0.026058587 | 0.030419428 | 0.030651394 | 0.027588525 |
| ENSG00000171574 | 0.020170419 | 0.026337174 | 0.02845379  | 0.016528602 |
| ENSG00000149926 | 0.017712606 | 0.02620543  | 0.025622737 | 0.017662272 |
| ENSG00000104267 | 0.114960039 | 0.086601298 | 0.087092147 | 0.091621455 |
| ENSG00000142794 | 0.035134611 | 0.038863571 | 0.033544634 | 0.032601761 |
| ENSG00000204310 | 0.014729816 | 0.024924048 | 0.024033336 | 0.01435344  |
| ENSG00000167775 | 0.032946886 | 0.03410387  | 0.031884973 | 0.031928666 |
| ENSG00000135503 | 0.043818276 | 0.030377284 | 0.032129673 | 0.029703561 |
| ENSG00000065621 | 0.027593924 | 0.029044127 | 0.029920573 | 0.027869251 |
| ENSG00000198018 | 0.023468619 | 0.029089252 | 0.02622441  | 0.019705442 |
| ENSG00000147416 | 0.022692308 | 0.030052762 | 0.030194449 | 0.023849152 |
| ENSG00000204694 | 0.016989642 | 0.025119984 | 0.024172332 | 0.015576275 |

|                 |             |             |             |             |
|-----------------|-------------|-------------|-------------|-------------|
| ENSG00000198553 | 0.01719695  | 0.026402231 | 0.026549765 | 0.018998043 |
| ENSG00000124006 | 0.017861128 | 0.026770764 | 0.025114252 | 0.017821756 |
| ENSG00000136688 | 0.01864131  | 0.027082578 | 0.025555573 | 0.01785663  |
| ENSG00000155275 | 0.018691296 | 0.026751962 | 0.026130762 | 0.018312222 |
| ENSG00000178093 | 0.02905173  | 0.031147554 | 0.032817044 | 0.024934685 |
| ENSG00000198863 | 0.032191722 | 0.034180903 | 0.031433098 | 0.027072379 |
| ENSG00000106344 | 0.036928733 | 0.037539469 | 0.034834518 | 0.03138189  |
| ENSG00000150394 | 0.019603852 | 0.028886011 | 0.028813522 | 0.018984291 |
| ENSG00000221823 | 0.025377646 | 0.036347656 | 0.031510929 | 0.022123972 |
| ENSG00000120563 | 0.017241924 | 0.025172194 | 0.025904348 | 0.015870485 |
| ENSG00000136854 | 0.019745049 | 0.026139935 | 0.026266    | 0.018068165 |
| ENSG00000151611 | 0.051501404 | 0.039716024 | 0.039224441 | 0.039430342 |
| ENSG00000180628 | 0.041756202 | 0.042048346 | 0.038250077 | 0.037147671 |
| ENSG00000033178 | 0.029567994 | 0.035836519 | 0.032316403 | 0.029318445 |
| ENSG00000007341 | 0.037986733 | 0.051324433 | 0.037359809 | 0.032635547 |
| ENSG00000188021 | 0.026020008 | 0.029157404 | 0.028181609 | 0.027378993 |
| ENSG00000197372 | 0.040713685 | 0.038697346 | 0.038021911 | 0.052179417 |
| ENSG00000168875 | 0.016046483 | 0.024588987 | 0.024431686 | 0.014906173 |
| ENSG00000163249 | 0.037189868 | 0.035763068 | 0.037350819 | 0.032238618 |
| ENSG00000132423 | 0.033995275 | 0.036012399 | 0.032753019 | 0.03669373  |
| ENSG00000170881 | 0.01904756  | 0.025243442 | 0.026209652 | 0.016037713 |
| ENSG00000184445 | 0.044423174 | 0.041805865 | 0.034591216 | 0.031597694 |
| ENSG00000172738 | 0.026758979 | 0.029507841 | 0.029972433 | 0.023404915 |
| ENSG00000151067 | 0.014798318 | 0.024250198 | 0.02436598  | 0.015718799 |
| ENSG00000143147 | 0.015261285 | 0.025203687 | 0.025068916 | 0.01553793  |
| ENSG00000086544 | 0.021449886 | 0.027584727 | 0.026827001 | 0.017360113 |
| ENSG00000153044 | 0.041699831 | 0.039716373 | 0.0339409   | 0.034208561 |
| ENSG00000143171 | 0.016226804 | 0.02494992  | 0.024794081 | 0.015263893 |
| ENSG00000160999 | 0.053143215 | 0.054517478 | 0.059323644 | 0.064540536 |
| ENSG00000189334 | 0.023339597 | 0.02801095  | 0.027683361 | 0.018112361 |
| ENSG00000166206 | 0.019688778 | 0.026305046 | 0.025801381 | 0.019092666 |
| ENSG00000085365 | 0.024985154 | 0.030687977 | 0.029419756 | 0.023567046 |
| ENSG00000214253 | 0.030921328 | 0.028732045 | 0.028825232 | 0.026597594 |
| ENSG00000131795 | 0.025501817 | 0.027494487 | 0.027993574 | 0.021404788 |
| ENSG00000091127 | 0.045417498 | 0.043747462 | 0.032391343 | 0.031111234 |
| ENSG00000180549 | 0.133125261 | 0.107764608 | 0.085145797 | 0.108275436 |
| ENSG00000124249 | 0.015289485 | 0.025366833 | 0.024322172 | 0.016031483 |
| ENSG00000139514 | 0.019094696 | 0.027035278 | 0.025925011 | 0.018138513 |
| ENSG00000198105 | 0.044389876 | 0.046768284 | 0.042249227 | 0.037779531 |
| ENSG00000123575 | 0.041360969 | 0.045310729 | 0.035535948 | 0.029487095 |
| ENSG00000164151 | 0.028264823 | 0.034415614 | 0.035451391 | 0.026045098 |
| ENSG00000111554 | 0.019759479 | 0.027131646 | 0.026634502 | 0.016261665 |
| ENSG00000206344 | 0.039786646 | 0.041471237 | 0.0354039   | 0.04250027  |
| ENSG00000150873 | 0.01541416  | 0.025643686 | 0.025094577 | 0.015517117 |
| ENSG00000137166 | 0.044219654 | 0.0412778   | 0.037838154 | 0.039570666 |
| ENSG00000163833 | 0.018120184 | 0.027298395 | 0.026121847 | 0.018147387 |
| ENSG00000147687 | 0.021133275 | 0.028326634 | 0.029781574 | 0.023496243 |
| ENSG00000163617 | 0.021447671 | 0.027566644 | 0.027467235 | 0.018788486 |
| ENSG00000136378 | 0.016961001 | 0.025886973 | 0.024164437 | 0.015140979 |
| ENSG00000121900 | 0.032952286 | 0.031418693 | 0.026823205 | 0.023179257 |
| ENSG00000189162 | 0.016457113 | 0.024620209 | 0.024862068 | 0.015899569 |
| ENSG00000243414 | 0.017583074 | 0.026021319 | 0.027465508 | 0.01701507  |
| ENSG00000004866 | 0.051788979 | 0.042020513 | 0.045349147 | 0.056586181 |
| ENSG00000176723 | 0.017818764 | 0.027129489 | 0.0255941   | 0.018323871 |

|                 |             |             |             |             |
|-----------------|-------------|-------------|-------------|-------------|
| ENSG00000158874 | 0.015678436 | 0.025265899 | 0.024928963 | 0.015742701 |
| ENSG00000133794 | 0.047063781 | 0.041880281 | 0.035213164 | 0.032315024 |
| ENSG00000169599 | 0.029875231 | 0.032231975 | 0.028530529 | 0.021873621 |
| ENSG00000169604 | 0.015024173 | 0.024734765 | 0.025304292 | 0.01483973  |
| ENSG00000204970 | 0.016526476 | 0.025762555 | 0.026224512 | 0.016776598 |
| ENSG00000179526 | 0.024909392 | 0.030529704 | 0.030288688 | 0.023839708 |
| ENSG00000102804 | 0.016775308 | 0.025890673 | 0.025817625 | 0.017211633 |
| ENSG00000134851 | 0.031219281 | 0.03559881  | 0.031918621 | 0.031567656 |
| ENSG00000150551 | 0.015507854 | 0.024503455 | 0.024607949 | 0.015549232 |
| ENSG00000173077 | 0.016955361 | 0.024657693 | 0.025170412 | 0.017608812 |
| ENSG00000112232 | 0.016407439 | 0.02450947  | 0.025070871 | 0.015588371 |
| ENSG00000177414 | 0.016987566 | 0.024965951 | 0.0255273   | 0.016111948 |
| ENSG00000204740 | 0.01584718  | 0.025095788 | 0.025561985 | 0.014711671 |
| ENSG00000196428 | 0.032436482 | 0.042738078 | 0.039945441 | 0.034047758 |
| ENSG00000198841 | 0.028326491 | 0.035234285 | 0.041721798 | 0.028703468 |
| ENSG00000165685 | 0.043168161 | 0.028864774 | 0.026384771 | 0.031639846 |
| ENSG00000083067 | 0.01502851  | 0.02466362  | 0.026047713 | 0.015134958 |
| ENSG00000163808 | 0.046301658 | 0.042767455 | 0.035083877 | 0.035650285 |
| ENSG00000183019 | 0.01607004  | 0.025152566 | 0.024556319 | 0.014736132 |
| ENSG00000163728 | 0.036746735 | 0.040342766 | 0.038181772 | 0.032543467 |
| ENSG00000104522 | 0.031623492 | 0.032855213 | 0.032870282 | 0.034483651 |
| ENSG00000130653 | 0.042585178 | 0.039065289 | 0.038643054 | 0.048306208 |
| ENSG00000184258 | 0.017463345 | 0.025847481 | 0.025483056 | 0.016090733 |
| ENSG00000173933 | 0.025542388 | 0.032369431 | 0.033705285 | 0.028261635 |
| ENSG00000165120 | 0.014706524 | 0.024908722 | 0.025423481 | 0.014624714 |
| ENSG00000135605 | 0.033880593 | 0.034996298 | 0.035699448 | 0.032185447 |
| ENSG00000130167 | 0.018036709 | 0.027138379 | 0.024621339 | 0.017971469 |
| ENSG00000163348 | 0.022768924 | 0.029787466 | 0.028646915 | 0.026061757 |
| ENSG00000174255 | 0.014905314 | 0.02668052  | 0.024751397 | 0.015585696 |
| ENSG00000143502 | 0.025813668 | 0.026525564 | 0.024652827 | 0.014635193 |
| ENSG00000114735 | 0.032889897 | 0.037691926 | 0.03329125  | 0.03908989  |
| ENSG00000128739 | 0.040074087 | 0.028631411 | 0.030639374 | 0.024913128 |
| ENSG00000142945 | 0.04092991  | 0.03633596  | 0.036230077 | 0.029224399 |
| ENSG00000115364 | 0.031458527 | 0.036979174 | 0.032430212 | 0.027925709 |
| ENSG00000154723 | 0.018972183 | 0.025817647 | 0.025391744 | 0.017523564 |
| ENSG00000137941 | 0.041891075 | 0.025971669 | 0.025545295 | 0.022495739 |
| ENSG00000150656 | 0.017100379 | 0.025971137 | 0.024714734 | 0.016368997 |
| ENSG00000183185 | 0.016291196 | 0.024635379 | 0.024678803 | 0.015369804 |
| ENSG00000100034 | 0.033869869 | 0.035860113 | 0.042957632 | 0.030134773 |
| ENSG00000158122 | 0.021295836 | 0.027596064 | 0.025115332 | 0.019253303 |
| ENSG00000104998 | 0.052417553 | 0.040127062 | 0.044248714 | 0.04139685  |
| ENSG00000087076 | 0.049029003 | 0.054094418 | 0.04427568  | 0.05199784  |
| ENSG00000196182 | 0.029796212 | 0.032235568 | 0.046875785 | 0.02950362  |
| ENSG00000183207 | 0.03047993  | 0.031007231 | 0.029269032 | 0.026484419 |
| ENSG00000198276 | 0.029616691 | 0.03167786  | 0.0317362   | 0.024736316 |
| ENSG00000164050 | 0.032581703 | 0.032439479 | 0.030295934 | 0.030707378 |
| ENSG00000163288 | 0.015801289 | 0.024836645 | 0.024751396 | 0.014916199 |
| ENSG00000001631 | 0.016646514 | 0.025582097 | 0.025613968 | 0.015891987 |
| ENSG00000136940 | 0.015355266 | 0.024830588 | 0.024412852 | 0.016101834 |
| ENSG00000136802 | 0.027313653 | 0.031173367 | 0.035794145 | 0.035959127 |
| ENSG00000120907 | 0.015691944 | 0.025652931 | 0.024201542 | 0.015660378 |
| ENSG00000131746 | 0.016940814 | 0.024812109 | 0.024889648 | 0.016835755 |
| ENSG00000196976 | 0.030900073 | 0.032323308 | 0.035186744 | 0.034017389 |
| ENSG00000111727 | 0.028435632 | 0.035213774 | 0.03072885  | 0.028449116 |

|                 |             |             |             |             |
|-----------------|-------------|-------------|-------------|-------------|
| ENSG00000184451 | 0.029662105 | 0.029462478 | 0.028332368 | 0.023834466 |
| ENSG00000146828 | 0.038900492 | 0.044512103 | 0.042596973 | 0.035983851 |
| ENSG00000196646 | 0.035109759 | 0.03459968  | 0.037853394 | 0.029583902 |
| ENSG00000100368 | 0.023140566 | 0.030089531 | 0.027931563 | 0.02208072  |
| ENSG00000166342 | 0.032900291 | 0.029395067 | 0.032719767 | 0.024290858 |
| ENSG00000062370 | 0.023060017 | 0.030564556 | 0.028199807 | 0.019500713 |
| ENSG00000153930 | 0.021625214 | 0.027826096 | 0.024873439 | 0.016504077 |
| ENSG00000128596 | 0.027405659 | 0.032328604 | 0.031912123 | 0.027507559 |
| ENSG00000198812 | 0.017031415 | 0.024466097 | 0.024592611 | 0.016722856 |
| ENSG00000136271 | 0.028941378 | 0.030238748 | 0.029327969 | 0.025047258 |
| ENSG00000171476 | 0.09392748  | 0.074214364 | 0.060628738 | 0.082179696 |
| ENSG00000197016 | 0.015585514 | 0.026323285 | 0.025578673 | 0.016122908 |
| ENSG00000113504 | 0.114824756 | 0.07395718  | 0.072141856 | 0.095678218 |
| ENSG00000129646 | 0.034380906 | 0.035855117 | 0.02975226  | 0.023883696 |
| ENSG00000204305 | 0.02554503  | 0.032718789 | 0.03078865  | 0.027774558 |
| ENSG00000185924 | 0.014341481 | 0.024867804 | 0.024363559 | 0.013443606 |
| ENSG00000136231 | 0.060942987 | 0.057136454 | 0.051442057 | 0.058449004 |
| ENSG00000204406 | 0.0319912   | 0.036259492 | 0.031551865 | 0.028510193 |
| ENSG00000142789 | 0.020320976 | 0.026736861 | 0.02503094  | 0.01783113  |
| ENSG00000049319 | 0.015638907 | 0.024819408 | 0.024981497 | 0.015255726 |
| ENSG00000135018 | 0.032333103 | 0.037266154 | 0.034470524 | 0.03150425  |
| ENSG00000146038 | 0.021721278 | 0.025806451 | 0.025851765 | 0.015537531 |
| ENSG00000142252 | 0.015727963 | 0.024208377 | 0.025859595 | 0.015402565 |
| ENSG00000108651 | 0.024826165 | 0.029361902 | 0.02824961  | 0.020388794 |
| ENSG00000171199 | 0.016044696 | 0.02554931  | 0.02626697  | 0.018159477 |
| ENSG00000186790 | 0.016259482 | 0.025369663 | 0.024387188 | 0.016590339 |
| ENSG00000164879 | 0.017895265 | 0.025398871 | 0.024939927 | 0.01524856  |
| ENSG00000116039 | 0.017010482 | 0.02584903  | 0.024311902 | 0.015502855 |
| ENSG00000163462 | 0.016027447 | 0.026432556 | 0.024510089 | 0.015378108 |
| ENSG00000169860 | 0.020377633 | 0.026229362 | 0.027314154 | 0.018686317 |
| ENSG00000064545 | 0.035908351 | 0.032184353 | 0.036035033 | 0.024608778 |
| ENSG00000183506 | 0.022485291 | 0.029093559 | 0.029976062 | 0.031049923 |
| ENSG00000066739 | 0.035402421 | 0.043517921 | 0.035904269 | 0.026733818 |
| ENSG00000170322 | 0.018619399 | 0.02672486  | 0.028449625 | 0.018547305 |
| ENSG00000130717 | 0.028784849 | 0.033463398 | 0.035662897 | 0.024534038 |
| ENSG00000148200 | 0.015440143 | 0.024581783 | 0.024991694 | 0.015328947 |
| ENSG00000109471 | 0.015746541 | 0.024242453 | 0.024998275 | 0.015440297 |
| ENSG00000066044 | 0.042637001 | 0.040316733 | 0.041523404 | 0.038513724 |
| ENSG00000087495 | 0.039556738 | 0.025908989 | 0.027088994 | 0.028276952 |
| ENSG00000159128 | 0.028601432 | 0.032894972 | 0.029733698 | 0.028959874 |
| ENSG00000132031 | 0.019040324 | 0.027433972 | 0.025325058 | 0.0222878   |
| ENSG00000113749 | 0.015884126 | 0.024358526 | 0.025326927 | 0.015469189 |
| ENSG00000153823 | 0.016345378 | 0.023914439 | 0.02583319  | 0.014868506 |
| ENSG00000120329 | 0.01536889  | 0.023991022 | 0.024476945 | 0.014020577 |
| ENSG00000181789 | 0.024272617 | 0.029649037 | 0.035450703 | 0.026668672 |
| ENSG00000108424 | 0.021355945 | 0.028154907 | 0.025960492 | 0.022929358 |
| ENSG00000139826 | 0.025047608 | 0.038580842 | 0.034597674 | 0.026341165 |
| ENSG00000130948 | 0.014896693 | 0.025136389 | 0.024820148 | 0.014346535 |
| ENSG00000114251 | 0.067667935 | 0.045162908 | 0.037071565 | 0.03736683  |
| ENSG00000100647 | 0.032010698 | 0.041075059 | 0.034568276 | 0.033596926 |
| ENSG00000121053 | 0.015500087 | 0.025022812 | 0.024804667 | 0.015430928 |
| ENSG00000196549 | 0.015662929 | 0.024791664 | 0.024397168 | 0.016895461 |
| ENSG00000159692 | 0.021154559 | 0.029172684 | 0.025596574 | 0.032791275 |
| ENSG00000143878 | 0.022061612 | 0.029375501 | 0.034626058 | 0.027967275 |

|                 |             |             |             |             |
|-----------------|-------------|-------------|-------------|-------------|
| ENSG00000141639 | 0.015719529 | 0.02609713  | 0.025055591 | 0.01566703  |
| ENSG00000198183 | 0.018288844 | 0.027458998 | 0.025622664 | 0.017199097 |
| ENSG00000160190 | 0.038353866 | 0.041268334 | 0.041063054 | 0.031693076 |
| ENSG00000198162 | 0.039673169 | 0.030001053 | 0.028795861 | 0.029551078 |
| ENSG00000134255 | 0.036898506 | 0.037320841 | 0.033520397 | 0.028637845 |
| ENSG00000095564 | 0.03465975  | 0.038898427 | 0.03433661  | 0.034600407 |
| ENSG00000076351 | 0.015664048 | 0.024365752 | 0.024353033 | 0.014832286 |
| ENSG00000185760 | 0.016209182 | 0.024472654 | 0.024600475 | 0.014332521 |
| ENSG00000176658 | 0.035599024 | 0.031096394 | 0.033103078 | 0.02641224  |
| ENSG00000101463 | 0.014635588 | 0.024247874 | 0.025468423 | 0.014611778 |
| ENSG00000089177 | 0.018984984 | 0.026320239 | 0.02697984  | 0.018095603 |
| ENSG00000130222 | 0.099711207 | 0.071198757 | 0.07782125  | 0.072577742 |
| ENSG00000063127 | 0.026644626 | 0.032310116 | 0.029051817 | 0.026142667 |
| ENSG00000122035 | 0.015121296 | 0.025031767 | 0.025236628 | 0.015087462 |
| ENSG00000168754 | 0.014430386 | 0.024716477 | 0.024377491 | 0.015181736 |
| ENSG00000115705 | 0.018279452 | 0.024863383 | 0.024446053 | 0.016324521 |
| ENSG00000100664 | 0.024152059 | 0.027631482 | 0.026942252 | 0.021043227 |
| ENSG00000162814 | 0.017480172 | 0.025022935 | 0.024528449 | 0.015108703 |
| ENSG00000171551 | 0.017840496 | 0.025252808 | 0.02439715  | 0.015129396 |
| ENSG00000067177 | 0.023482417 | 0.044182336 | 0.038671501 | 0.035599315 |
| ENSG00000124920 | 0.088432251 | 0.088153152 | 0.052718326 | 0.075593777 |
| ENSG00000180083 | 0.016131857 | 0.026104414 | 0.024622192 | 0.014815567 |
| ENSG00000228300 | 0.028943043 | 0.033697439 | 0.029618685 | 0.027215345 |
| ENSG00000109107 | 0.051979315 | 0.042251625 | 0.03349299  | 0.042228086 |
| ENSG00000122026 | 0.015739881 | 0.0241802   | 0.023401279 | 0.017433485 |
| ENSG00000212899 | 0.016351681 | 0.024996349 | 0.025921515 | 0.015374919 |
| ENSG00000135048 | 0.059814505 | 0.060216089 | 0.05785394  | 0.06514082  |
| ENSG00000159363 | 0.028310737 | 0.033346491 | 0.033822376 | 0.039415282 |
| ENSG00000053702 | 0.015641693 | 0.024151529 | 0.024520271 | 0.015783727 |
| ENSG00000168661 | 0.052190231 | 0.0438243   | 0.043778826 | 0.034606749 |
| ENSG00000011009 | 0.02336281  | 0.031653192 | 0.034732066 | 0.027359723 |
| ENSG00000125122 | 0.020085718 | 0.027287234 | 0.025191087 | 0.019944634 |
| ENSG00000163050 | 0.039134572 | 0.035026501 | 0.034472133 | 0.031866017 |
| ENSG00000213672 | 0.064841525 | 0.052498278 | 0.042688466 | 0.046509948 |
| ENSG00000100526 | 0.039503669 | 0.032061234 | 0.033465027 | 0.028350511 |
| ENSG00000169607 | 0.051116932 | 0.04004399  | 0.039834326 | 0.038343192 |
| ENSG00000100078 | 0.015169173 | 0.024496754 | 0.02522668  | 0.015758914 |
| ENSG00000026652 | 0.02350237  | 0.026472809 | 0.026599402 | 0.019935618 |
| ENSG00000159263 | 0.018327927 | 0.027240187 | 0.024968779 | 0.016781021 |
| ENSG00000001036 | 0.033743553 | 0.032973499 | 0.030840359 | 0.031719577 |
| ENSG00000171873 | 0.014730927 | 0.025179353 | 0.024995221 | 0.014291679 |
| ENSG00000120742 | 0.028915256 | 0.034874261 | 0.034409668 | 0.029583514 |
| ENSG00000160007 | 0.038348531 | 0.04339877  | 0.035220807 | 0.035165661 |
| ENSG00000169398 | 0.130317302 | 0.09011789  | 0.087303612 | 0.109845643 |
| ENSG00000108176 | 0.06201443  | 0.048693444 | 0.035951994 | 0.032252218 |
| ENSG00000026751 | 0.027531022 | 0.032902892 | 0.033548003 | 0.025595796 |
| ENSG00000059804 | 0.050015946 | 0.04965571  | 0.071959386 | 0.063436383 |
| ENSG00000185658 | 0.034902468 | 0.051261296 | 0.050021444 | 0.03496537  |
| ENSG00000221819 | 0.016337437 | 0.024863795 | 0.024421675 | 0.014635942 |
| ENSG00000164654 | 0.031275801 | 0.031647924 | 0.03043221  | 0.024998099 |
| ENSG00000117155 | 0.020539796 | 0.02757368  | 0.026429404 | 0.016199002 |
| ENSG00000181704 | 0.029121669 | 0.034331195 | 0.032497306 | 0.022686835 |
| ENSG00000115525 | 0.074112548 | 0.071092828 | 0.048653972 | 0.056132967 |
| ENSG00000189079 | 0.033082101 | 0.032815848 | 0.03210668  | 0.024965468 |

|                 |             |             |             |             |
|-----------------|-------------|-------------|-------------|-------------|
| ENSG00000174032 | 0.04336525  | 0.045635685 | 0.037604188 | 0.03221862  |
| ENSG00000103021 | 0.035183469 | 0.033812108 | 0.034468143 | 0.033932453 |
| ENSG00000163235 | 0.014979305 | 0.024412309 | 0.025649439 | 0.015083653 |
| ENSG00000060688 | 0.025863966 | 0.030393417 | 0.032971467 | 0.026205059 |
| ENSG00000172653 | 0.01637212  | 0.024315407 | 0.024793798 | 0.015073187 |
| ENSG00000127325 | 0.015628475 | 0.026589427 | 0.025848304 | 0.017313715 |
| ENSG00000003096 | 0.019098719 | 0.025576573 | 0.025876672 | 0.022229595 |
| ENSG00000106624 | 0.079027575 | 0.066459221 | 0.05964046  | 0.059850274 |
| ENSG00000178974 | 0.026638612 | 0.037030629 | 0.033838821 | 0.019622261 |
| ENSG00000169474 | 0.015295454 | 0.024498808 | 0.024407685 | 0.015527992 |
| ENSG00000088280 | 0.019510396 | 0.024954055 | 0.024407391 | 0.014317835 |
| ENSG00000094916 | 0.033518313 | 0.035137243 | 0.033867987 | 0.030044063 |
| ENSG00000177465 | 0.071077528 | 0.056088253 | 0.040666438 | 0.044053954 |
| ENSG00000156017 | 0.016198065 | 0.02446275  | 0.025221498 | 0.014765774 |
| ENSG00000136826 | 0.064235316 | 0.038975706 | 0.031425605 | 0.03708229  |
| ENSG00000126838 | 0.016553311 | 0.025604315 | 0.024518261 | 0.014624862 |
| ENSG00000082213 | 0.033840092 | 0.041246373 | 0.041195918 | 0.037529552 |
| ENSG00000158806 | 0.045555207 | 0.039780568 | 0.042040557 | 0.042220531 |
| ENSG00000164211 | 0.036100473 | 0.037282957 | 0.038187752 | 0.037035143 |
| ENSG00000165025 | 0.059553944 | 0.049428212 | 0.046018974 | 0.042900956 |
| ENSG00000221995 | 0.03652178  | 0.033747153 | 0.032768889 | 0.034369077 |
| ENSG00000124120 | 0.039172129 | 0.038544073 | 0.034842373 | 0.040011243 |
| ENSG00000120457 | 0.01462346  | 0.025136728 | 0.024864333 | 0.014370925 |
| ENSG00000165533 | 0.036173687 | 0.039555892 | 0.035778106 | 0.05235629  |
| ENSG00000173276 | 0.01834317  | 0.028705026 | 0.02658787  | 0.015187706 |
| ENSG00000162592 | 0.01720805  | 0.02528591  | 0.025183545 | 0.018286553 |
| ENSG00000179873 | 0.082065145 | 0.033630224 | 0.050621824 | 0.049860597 |
| ENSG00000165507 | 0.097540477 | 0.09898511  | 0.097091527 | 0.092466993 |
| ENSG00000173267 | 0.018831506 | 0.024277408 | 0.024109391 | 0.014264391 |
| ENSG00000204390 | 0.032385553 | 0.030357014 | 0.030263826 | 0.024918735 |
| ENSG00000115718 | 0.015638588 | 0.02485108  | 0.024472157 | 0.01548491  |
| ENSG00000119541 | 0.025440784 | 0.030957564 | 0.0313818   | 0.027241532 |
| ENSG00000143198 | 0.037239329 | 0.038049062 | 0.039593384 | 0.03062077  |
| ENSG00000109944 | 0.019177271 | 0.026673265 | 0.025722772 | 0.018263365 |
| ENSG00000162989 | 0.016467682 | 0.025484508 | 0.024713905 | 0.015727605 |
| ENSG00000213023 | 0.016557806 | 0.024937921 | 0.026794447 | 0.015398157 |
| ENSG00000204472 | 0.016365043 | 0.02518547  | 0.024787598 | 0.016170085 |
| ENSG00000197713 | 0.045317979 | 0.048193547 | 0.039576117 | 0.030553616 |
| ENSG00000143842 | 0.036287294 | 0.026492506 | 0.02607799  | 0.018858136 |
| ENSG00000139351 | 0.01898251  | 0.02788297  | 0.028447118 | 0.014503626 |
| ENSG00000183763 | 0.039653672 | 0.031248358 | 0.033918243 | 0.031918156 |
| ENSG00000109606 | 0.028510496 | 0.035211358 | 0.028317399 | 0.029618352 |
| ENSG00000175324 | 0.022620437 | 0.030851437 | 0.032955097 | 0.022967601 |
| ENSG00000007402 | 0.017532233 | 0.024702648 | 0.02460512  | 0.015324679 |
| ENSG00000173273 | 0.023120136 | 0.029986282 | 0.028514621 | 0.019788104 |
| ENSG00000172613 | 0.033572588 | 0.031103635 | 0.031599706 | 0.024114693 |
| ENSG00000103512 | 0.025472635 | 0.030319948 | 0.03147734  | 0.02692767  |
| ENSG00000139910 | 0.026239879 | 0.028225792 | 0.031881912 | 0.026306614 |
| ENSG00000073464 | 0.025988977 | 0.026109667 | 0.025181384 | 0.019925429 |
| ENSG00000165916 | 0.027569352 | 0.030285739 | 0.030187857 | 0.027700971 |
| ENSG00000166527 | 0.018672709 | 0.025995986 | 0.026662629 | 0.025295715 |
| ENSG00000176246 | 0.0187651   | 0.027439513 | 0.02648575  | 0.017463859 |
| ENSG00000006125 | 0.026766567 | 0.033147348 | 0.032715267 | 0.025986158 |
| ENSG00000109062 | 0.048675872 | 0.044228821 | 0.040333168 | 0.039768384 |

|                 |             |             |             |             |
|-----------------|-------------|-------------|-------------|-------------|
| ENSG00000108312 | 0.032727565 | 0.03393951  | 0.031805883 | 0.030757245 |
| ENSG00000128266 | 0.066313162 | 0.047095217 | 0.03093469  | 0.026764469 |
| ENSG00000125445 | 0.0277688   | 0.032512025 | 0.031651975 | 0.025878204 |
| ENSG00000120156 | 0.016583483 | 0.0247091   | 0.024474808 | 0.015768062 |
| ENSG00000164161 | 0.021594226 | 0.028059014 | 0.026324598 | 0.019547599 |
| ENSG00000168582 | 0.020463595 | 0.027459359 | 0.028538009 | 0.018962451 |
| ENSG00000185621 | 0.014556463 | 0.025027492 | 0.024635847 | 0.015913486 |
| ENSG00000103316 | 0.138613781 | 0.083985195 | 0.091932412 | 0.114254697 |
| ENSG00000075711 | 0.045785677 | 0.049461525 | 0.044130412 | 0.046136703 |
| ENSG00000173801 | 0.033148707 | 0.029846618 | 0.031753597 | 0.0247811   |
| ENSG00000134243 | 0.018595122 | 0.025922859 | 0.028480464 | 0.016341806 |
| ENSG00000178202 | 0.051631945 | 0.049433767 | 0.038166769 | 0.042825473 |
| ENSG00000128714 | 0.014734096 | 0.025228577 | 0.02595694  | 0.015470021 |
| ENSG00000163629 | 0.116521214 | 0.05015581  | 0.028495569 | 0.052547833 |
| ENSG00000088881 | 0.016635392 | 0.025613567 | 0.02613835  | 0.017088524 |
| ENSG00000067064 | 0.025105348 | 0.031010908 | 0.028527861 | 0.022052599 |
| ENSG00000205683 | 0.016925828 | 0.025763724 | 0.02417146  | 0.01482482  |
| ENSG00000156575 | 0.016934923 | 0.024524989 | 0.024581034 | 0.015088355 |
| ENSG00000130656 | 0.015817994 | 0.02531148  | 0.025298878 | 0.016378913 |
| ENSG00000025772 | 0.036825932 | 0.05216023  | 0.044707483 | 0.034843156 |
| ENSG00000127561 | 0.040085288 | 0.040658878 | 0.035137208 | 0.034015945 |
| ENSG00000128567 | 0.020141865 | 0.027733247 | 0.027299631 | 0.017119345 |
| ENSG00000167612 | 0.026718954 | 0.028103006 | 0.027667938 | 0.030589624 |
| ENSG00000221916 | 0.017355287 | 0.025917413 | 0.026269628 | 0.01803438  |
| ENSG00000154025 | 0.018153833 | 0.026413102 | 0.02845549  | 0.017000065 |
| ENSG00000115355 | 0.016417735 | 0.024714456 | 0.02504479  | 0.016237555 |
| ENSG00000146576 | 0.030662411 | 0.038916936 | 0.046566388 | 0.032974612 |
| ENSG00000124802 | 0.030913613 | 0.032259139 | 0.032310658 | 0.034828815 |
| ENSG00000196331 | 0.017639977 | 0.026099238 | 0.026330466 | 0.015136164 |
| ENSG00000163219 | 0.097115474 | 0.089849251 | 0.080481474 | 0.086171752 |
| ENSG00000205629 | 0.024695946 | 0.03313662  | 0.030995249 | 0.020657859 |
| ENSG00000161896 | 0.015958247 | 0.026214915 | 0.026009323 | 0.016706622 |
| ENSG00000100191 | 0.017160214 | 0.024378739 | 0.024490049 | 0.016521518 |
| ENSG00000092621 | 0.091324349 | 0.053261826 | 0.044355667 | 0.059217501 |
| ENSG00000117399 | 0.042033993 | 0.038878427 | 0.035778217 | 0.037770832 |
| ENSG00000117305 | 0.036951927 | 0.034732467 | 0.035510011 | 0.033426661 |
| ENSG00000139174 | 0.04327855  | 0.044256888 | 0.049122159 | 0.045857556 |
| ENSG00000108854 | 0.037584403 | 0.036372104 | 0.040558521 | 0.026584987 |
| ENSG00000137210 | 0.026030311 | 0.028737279 | 0.027851442 | 0.028898399 |
| ENSG00000239305 | 0.0389452   | 0.043072488 | 0.047786536 | 0.038212413 |
| ENSG00000112208 | 0.033193061 | 0.033781576 | 0.032578345 | 0.029440065 |
| ENSG00000181163 | 0.017675986 | 0.02592497  | 0.024900945 | 0.015636043 |
| ENSG00000160469 | 0.018077503 | 0.027074774 | 0.027251472 | 0.015411075 |
| ENSG00000119698 | 0.074712223 | 0.040841884 | 0.035252233 | 0.102793874 |
| ENSG00000126759 | 0.048237592 | 0.057791802 | 0.046541558 | 0.05763986  |
| ENSG00000197937 | 0.026307045 | 0.032671269 | 0.027687094 | 0.025825674 |
| ENSG00000048649 | 0.022213129 | 0.029800774 | 0.0315326   | 0.02003033  |
| ENSG00000122490 | 0.028500549 | 0.032769604 | 0.031326179 | 0.02175351  |
| ENSG00000064313 | 0.027729369 | 0.035347321 | 0.031819261 | 0.024762081 |
| ENSG00000089250 | 0.016541134 | 0.025296365 | 0.024165564 | 0.014831681 |
| ENSG00000089723 | 0.018690406 | 0.026874399 | 0.027689634 | 0.01928935  |
| ENSG00000116691 | 0.066260577 | 0.045335472 | 0.047319936 | 0.048287034 |
| ENSG00000116882 | 0.01498325  | 0.026148847 | 0.025218647 | 0.015225552 |
| ENSG00000145348 | 0.067432558 | 0.062871969 | 0.047113427 | 0.044675118 |

|                 |             |             |             |             |
|-----------------|-------------|-------------|-------------|-------------|
| ENSG00000156970 | 0.042480061 | 0.038345954 | 0.034422426 | 0.034748498 |
| ENSG00000217555 | 0.085161078 | 0.083464348 | 0.091985536 | 0.089997759 |
| ENSG00000143786 | 0.05525231  | 0.036854752 | 0.031316032 | 0.034714212 |
| ENSG0000022277  | 0.019742048 | 0.028106367 | 0.027871487 | 0.018274563 |
| ENSG00000113269 | 0.068653607 | 0.077142418 | 0.054021336 | 0.067947446 |
| ENSG00000183785 | 0.015697525 | 0.02517463  | 0.024859258 | 0.015608266 |
| ENSG00000225932 | 0.048714375 | 0.048184359 | 0.043937762 | 0.050621344 |
| ENSG00000165832 | 0.030753974 | 0.042406061 | 0.032173077 | 0.029616332 |
| ENSG00000099937 | 0.031810177 | 0.059704173 | 0.045514206 | 0.039981901 |
| ENSG00000055044 | 0.025383953 | 0.029446071 | 0.033750525 | 0.029500317 |
| ENSG00000125249 | 0.03500425  | 0.038364143 | 0.033229089 | 0.029812844 |
| ENSG00000028116 | 0.03553591  | 0.042310475 | 0.033301942 | 0.029335669 |
| ENSG00000103043 | 0.025409116 | 0.031365942 | 0.033358809 | 0.033388101 |
| ENSG00000114861 | 0.106246383 | 0.103078869 | 0.086380887 | 0.104627391 |
| ENSG00000103024 | 0.033418689 | 0.032078452 | 0.032846323 | 0.034808495 |
| ENSG00000114316 | 0.025144403 | 0.032315705 | 0.029994988 | 0.024490118 |
| ENSG00000115459 | 0.022606372 | 0.031587501 | 0.027850379 | 0.041571332 |
| ENSG00000073050 | 0.031093751 | 0.033789271 | 0.028741673 | 0.023646306 |
| ENSG00000064666 | 0.048404059 | 0.050468297 | 0.060510623 | 0.050666604 |
| ENSG00000213853 | 0.033028093 | 0.035878906 | 0.029471392 | 0.02973352  |
| ENSG00000186226 | 0.040843016 | 0.03385098  | 0.028933738 | 0.027384659 |
| ENSG00000185324 | 0.020302891 | 0.027818922 | 0.026591813 | 0.019003755 |
| ENSG00000129173 | 0.057712124 | 0.036648712 | 0.035898048 | 0.03687085  |
| ENSG00000139737 | 0.055541136 | 0.054032767 | 0.045947562 | 0.044793941 |
| ENSG00000179094 | 0.034398676 | 0.048503143 | 0.049723332 | 0.052849199 |
| ENSG00000056558 | 0.03737994  | 0.029316092 | 0.032135193 | 0.031319765 |
| ENSG00000119514 | 0.030507613 | 0.043472474 | 0.03510636  | 0.030114267 |
| ENSG00000159208 | 0.031093847 | 0.032347825 | 0.029856699 | 0.028051718 |
| ENSG00000204003 | 0.017897473 | 0.026963272 | 0.02527559  | 0.01670561  |
| ENSG00000070915 | 0.022503023 | 0.026174535 | 0.027649508 | 0.025529001 |
| ENSG00000109163 | 0.016535412 | 0.024710807 | 0.02663227  | 0.014626322 |
| ENSG00000100888 | 0.02468467  | 0.03330271  | 0.030513019 | 0.021707914 |
| ENSG00000114115 | 0.044927253 | 0.054238054 | 0.042998748 | 0.052580595 |
| ENSG00000144559 | 0.042514744 | 0.039392792 | 0.035278814 | 0.026650066 |
| ENSG00000197858 | 0.037548997 | 0.035726615 | 0.036746768 | 0.036307335 |
| ENSG00000179168 | 0.016789656 | 0.025578133 | 0.026227162 | 0.016336109 |
| ENSG00000119720 | 0.019096949 | 0.026675255 | 0.027162218 | 0.019659666 |
| ENSG00000151292 | 0.030113747 | 0.036705546 | 0.037024024 | 0.031513651 |
| ENSG00000188992 | 0.018551758 | 0.02643893  | 0.025916839 | 0.016914516 |
| ENSG00000197170 | 0.039467063 | 0.044959966 | 0.037057183 | 0.033889662 |
| ENSG00000149311 | 0.015179837 | 0.025258341 | 0.025128805 | 0.014827408 |
| ENSG00000174808 | 0.015766796 | 0.02627156  | 0.024791145 | 0.018036064 |
| ENSG00000087095 | 0.027939875 | 0.04010816  | 0.03775955  | 0.029631927 |
| ENSG00000126453 | 0.029832793 | 0.030162872 | 0.028111564 | 0.024480491 |
| ENSG00000152409 | 0.04651155  | 0.057438923 | 0.05491614  | 0.050351405 |
| ENSG00000185129 | 0.024710648 | 0.031005954 | 0.029141133 | 0.024578995 |
| ENSG00000149639 | 0.021073317 | 0.027547875 | 0.026352199 | 0.020926008 |
| ENSG00000137955 | 0.029594519 | 0.030226075 | 0.02727326  | 0.021253777 |
| ENSG00000142149 | 0.016724206 | 0.025469258 | 0.02649469  | 0.015810072 |
| ENSG00000157017 | 0.03700909  | 0.032004278 | 0.031759819 | 0.029555568 |
| ENSG00000168612 | 0.016305107 | 0.026941745 | 0.02685601  | 0.016266171 |
| ENSG00000033800 | 0.022001049 | 0.028884505 | 0.030732866 | 0.022673893 |
| ENSG00000230463 | 0.227990217 | 0.245892985 | 0.24195951  | 0.143518506 |
| ENSG00000077549 | 0.022713961 | 0.030230126 | 0.028489414 | 0.023114371 |



|                 |             |             |             |             |
|-----------------|-------------|-------------|-------------|-------------|
| ENSG00000250423 | 0.0475919   | 0.03009931  | 0.024953953 | 0.01476162  |
| ENSG00000161249 | 0.103718138 | 0.090916479 | 0.074412097 | 0.086277186 |
| ENSG00000102543 | 0.017901472 | 0.026315074 | 0.026169986 | 0.017093754 |
| ENSG00000128463 | 0.025833504 | 0.030865027 | 0.030100934 | 0.020979186 |
| ENSG00000180660 | 0.022630508 | 0.026089852 | 0.02713868  | 0.020509134 |
| ENSG00000108342 | 0.017470193 | 0.027829192 | 0.027492241 | 0.01905982  |
| ENSG00000104043 | 0.053919449 | 0.034756658 | 0.032567026 | 0.027516674 |
| ENSG00000182534 | 0.068595167 | 0.089366884 | 0.086905797 | 0.108203663 |
| ENSG00000171368 | 0.018572096 | 0.02690532  | 0.025290473 | 0.016429181 |
| ENSG00000142856 | 0.030141559 | 0.034436504 | 0.029765958 | 0.024298146 |
| ENSG00000164112 | 0.015907581 | 0.025562043 | 0.025222651 | 0.016219053 |
| ENSG00000213638 | 0.037188628 | 0.037878464 | 0.043932175 | 0.035272331 |
| ENSG00000177565 | 0.034582794 | 0.03433191  | 0.033315822 | 0.025850742 |
| ENSG00000149050 | 0.024902894 | 0.028898179 | 0.027069017 | 0.019271314 |
| ENSG00000196961 | 0.02735018  | 0.035169989 | 0.02893173  | 0.02688306  |
| ENSG00000180424 | 0.018061816 | 0.025359211 | 0.024894443 | 0.017111995 |
| ENSG00000240654 | 0.014462409 | 0.024904713 | 0.024184868 | 0.014988073 |
| ENSG00000050555 | 0.017490876 | 0.025939233 | 0.02563221  | 0.016070832 |
| ENSG00000174989 | 0.014870765 | 0.025473662 | 0.024302791 | 0.014428205 |
| ENSG00000186510 | 0.04990005  | 0.05113753  | 0.048637386 | 0.046661658 |
| ENSG00000136878 | 0.023729087 | 0.031592311 | 0.033223593 | 0.026389997 |
| ENSG00000152492 | 0.017849089 | 0.026680522 | 0.02630307  | 0.020629904 |
| ENSG00000184640 | 0.03112829  | 0.031797681 | 0.03139953  | 0.025850551 |
| ENSG00000187026 | 0.018886048 | 0.0265769   | 0.026106074 | 0.017979714 |
| ENSG00000146833 | 0.037145169 | 0.04041359  | 0.041500173 | 0.028787248 |
| ENSG00000188153 | 0.053974501 | 0.026062813 | 0.025288543 | 0.021258635 |
| ENSG00000039123 | 0.027569338 | 0.032862914 | 0.029320684 | 0.020866869 |
| ENSG00000087111 | 0.02722953  | 0.032948491 | 0.031204587 | 0.026785909 |
| ENSG00000130826 | 0.029312063 | 0.032711918 | 0.033418274 | 0.027992177 |
| ENSG00000169683 | 0.059517616 | 0.0530124   | 0.045673914 | 0.03831195  |
| ENSG00000172817 | 0.117900205 | 0.079424422 | 0.078807507 | 0.105571111 |
| ENSG00000180423 | 0.020208949 | 0.025878621 | 0.027314601 | 0.019804909 |
| ENSG00000188959 | 0.01358332  | 0.024670207 | 0.024039882 | 0.013267592 |
| ENSG00000164062 | 0.033003827 | 0.033923686 | 0.030450846 | 0.026142724 |
| ENSG00000165264 | 0.030363274 | 0.030911101 | 0.028266177 | 0.026755424 |
| ENSG00000163154 | 0.05222055  | 0.056734511 | 0.044985    | 0.045180991 |
| ENSG00000159337 | 0.015099091 | 0.024787162 | 0.025327711 | 0.014976927 |
| ENSG00000086619 | 0.035231646 | 0.035251442 | 0.039723573 | 0.03476654  |
| ENSG00000008196 | 0.045915249 | 0.025035296 | 0.025508793 | 0.02805607  |
| ENSG00000047056 | 0.022853063 | 0.029119731 | 0.028501941 | 0.020640551 |
| ENSG00000239998 | 0.046160043 | 0.047479047 | 0.051804501 | 0.064693431 |
| ENSG00000141337 | 0.02388426  | 0.027908055 | 0.029783624 | 0.020467211 |
| ENSG00000050730 | 0.049084851 | 0.041558316 | 0.035625736 | 0.050105468 |
| ENSG00000249760 | 0.041111258 | 0.030683079 | 0.035226771 | 0.027251037 |
| ENSG00000213918 | 0.023362578 | 0.034504078 | 0.029742975 | 0.023964726 |
| ENSG00000196684 | 0.033942199 | 0.033148267 | 0.04396656  | 0.035122842 |
| ENSG00000183103 | 0.01707995  | 0.025278367 | 0.026107162 | 0.015264867 |
| ENSG00000003509 | 0.039271338 | 0.045249874 | 0.035841893 | 0.031247059 |
| ENSG00000115271 | 0.034018349 | 0.034891018 | 0.02977684  | 0.02745647  |
| ENSG00000181544 | 0.0366865   | 0.045006081 | 0.030461324 | 0.027166879 |
| ENSG00000160410 | 0.027917762 | 0.032016286 | 0.035347034 | 0.029856272 |
| ENSG00000241690 | 0.01595131  | 0.02476713  | 0.025057084 | 0.014920671 |
| ENSG00000136811 | 0.025394986 | 0.029644983 | 0.028091678 | 0.018977676 |
| ENSG00000177600 | 0.016941177 | 0.02542295  | 0.026016969 | 0.017124491 |

|                 |             |             |             |             |
|-----------------|-------------|-------------|-------------|-------------|
| ENSG0000066230  | 0.016532433 | 0.024918848 | 0.024967823 | 0.016162513 |
| ENSG00000143768 | 0.015978379 | 0.024938887 | 0.026085043 | 0.016125179 |
| ENSG00000124701 | 0.018973023 | 0.0271673   | 0.028649347 | 0.015973957 |
| ENSG00000197153 | 0.062813842 | 0.046367586 | 0.063325329 | 0.066025973 |
| ENSG00000125503 | 0.033879361 | 0.039969638 | 0.031773566 | 0.031824437 |
| ENSG00000100764 | 0.022018797 | 0.02775502  | 0.027681978 | 0.020016226 |
| ENSG00000107290 | 0.026745069 | 0.030393315 | 0.034422431 | 0.035604586 |
| ENSG00000130227 | 0.033245755 | 0.042757111 | 0.033585981 | 0.025916254 |
| ENSG00000062038 | 0.015980601 | 0.024529059 | 0.024358217 | 0.016319693 |
| ENSG00000101843 | 0.026669763 | 0.032913375 | 0.029309161 | 0.020435    |
| ENSG00000088826 | 0.015625099 | 0.025508242 | 0.025263476 | 0.015346569 |
| ENSG00000151917 | 0.034587074 | 0.029148471 | 0.029282351 | 0.025668437 |
| ENSG00000132639 | 0.01622415  | 0.025765284 | 0.025894585 | 0.021124354 |
| ENSG00000063587 | 0.032406851 | 0.032806958 | 0.03446908  | 0.032645459 |
| ENSG00000133138 | 0.021045099 | 0.02795177  | 0.028355728 | 0.019826858 |
| ENSG00000186526 | 0.015174265 | 0.024819827 | 0.024972204 | 0.015896457 |
| ENSG00000182585 | 0.0158317   | 0.025233169 | 0.02486135  | 0.016381266 |
| ENSG00000145721 | 0.016873627 | 0.026577154 | 0.02556085  | 0.016685113 |
| ENSG00000074054 | 0.027043583 | 0.035108538 | 0.033457262 | 0.024167177 |
| ENSG00000069011 | 0.018805841 | 0.026961101 | 0.027009669 | 0.018088779 |
| ENSG00000172538 | 0.01823585  | 0.025431418 | 0.027708213 | 0.016383881 |
| ENSG00000012504 | 0.022277439 | 0.029353746 | 0.025331999 | 0.020385111 |
| ENSG00000135750 | 0.103878712 | 0.1104387   | 0.083605864 | 0.094562235 |
| ENSG00000167394 | 0.024206482 | 0.029601213 | 0.034889495 | 0.026486986 |
| ENSG00000240891 | 0.017529625 | 0.025517404 | 0.025145669 | 0.016369226 |
| ENSG00000113845 | 0.032589147 | 0.036847607 | 0.029646238 | 0.024666443 |
| ENSG00000120328 | 0.014972711 | 0.024846976 | 0.025349017 | 0.015257656 |
| ENSG00000169087 | 0.040331382 | 0.041780441 | 0.038494157 | 0.037742848 |
| ENSG00000204006 | 0.01611981  | 0.025511849 | 0.025727836 | 0.014787612 |
| ENSG00000176845 | 0.046114235 | 0.057573052 | 0.047741358 | 0.039014744 |
| ENSG00000143507 | 0.051494914 | 0.043395945 | 0.049129771 | 0.044156107 |
| ENSG00000124562 | 0.025493463 | 0.026696951 | 0.027708217 | 0.023291951 |
| ENSG00000120669 | 0.017281484 | 0.025838351 | 0.026023285 | 0.016568305 |
| ENSG00000136542 | 0.033432951 | 0.025480471 | 0.025395354 | 0.015678204 |
| ENSG00000122786 | 0.029283941 | 0.025567417 | 0.026224211 | 0.018625003 |
| ENSG00000223609 | 0.085935894 | 0.033199073 | 0.042799869 | 0.083043489 |
| ENSG00000156009 | 0.023890928 | 0.024394397 | 0.025545271 | 0.016007832 |
| ENSG00000166405 | 0.030182286 | 0.030912882 | 0.027329053 | 0.023643346 |
| ENSG00000131437 | 0.046315985 | 0.041044963 | 0.043320929 | 0.03966687  |
| ENSG00000177370 | 0.05269897  | 0.052399014 | 0.057888441 | 0.054099979 |
| ENSG00000122390 | 0.018186339 | 0.028579792 | 0.03185809  | 0.025033509 |
| ENSG00000070495 | 0.016843569 | 0.025478967 | 0.025162102 | 0.01598017  |
| ENSG00000158710 | 0.025969898 | 0.029777191 | 0.031415356 | 0.032058968 |
| ENSG00000103005 | 0.035706924 | 0.04136199  | 0.033775049 | 0.034093723 |
| ENSG00000184408 | 0.074876262 | 0.062663521 | 0.047459687 | 0.065238911 |
| ENSG00000058673 | 0.020934865 | 0.028940313 | 0.030259411 | 0.018406434 |
| ENSG00000091128 | 0.01719517  | 0.027652472 | 0.026702296 | 0.017423585 |
| ENSG00000167232 | 0.019384111 | 0.026351775 | 0.02806328  | 0.017139584 |
| ENSG00000251380 | 0.016088486 | 0.025440098 | 0.025577058 | 0.015858176 |
| ENSG00000101126 | 0.026887175 | 0.03179545  | 0.029097994 | 0.022012707 |
| ENSG00000114650 | 0.026020642 | 0.036247715 | 0.032505642 | 0.02484927  |
| ENSG00000085741 | 0.053122879 | 0.049118564 | 0.043227272 | 0.050456182 |
| ENSG00000077080 | 0.017560749 | 0.025495536 | 0.025294511 | 0.018882761 |
| ENSG00000152932 | 0.058455844 | 0.041433895 | 0.051119721 | 0.060204541 |

|                 |             |             |             |             |
|-----------------|-------------|-------------|-------------|-------------|
| ENSG00000109971 | 0.027304622 | 0.03296588  | 0.033943442 | 0.024281984 |
| ENSG00000064490 | 0.022786097 | 0.028875126 | 0.028385754 | 0.02243642  |
| ENSG00000171872 | 0.014524868 | 0.026069684 | 0.025131616 | 0.015094534 |
| ENSG00000144119 | 0.018009734 | 0.026567762 | 0.026697606 | 0.016175371 |
| ENSG00000165566 | 0.032842388 | 0.027576174 | 0.025712959 | 0.019791663 |
| ENSG00000143032 | 0.017782824 | 0.025170633 | 0.025115091 | 0.016166701 |
| ENSG00000129566 | 0.030826934 | 0.031511708 | 0.03395909  | 0.028113429 |
| ENSG00000205359 | 0.015979051 | 0.025444067 | 0.024709427 | 0.016054412 |
| ENSG00000046647 | 0.040626095 | 0.036191515 | 0.031275215 | 0.035787514 |
| ENSG00000188770 | 0.014061745 | 0.024438328 | 0.025786839 | 0.015277622 |
| ENSG00000185088 | 0.020169608 | 0.027830362 | 0.026691522 | 0.017583972 |
| ENSG00000182851 | 0.015348698 | 0.024953924 | 0.025293415 | 0.01471782  |
| ENSG00000164077 | 0.034481575 | 0.034472595 | 0.034498511 | 0.033621622 |
| ENSG00000175513 | 0.015399746 | 0.025274855 | 0.025659641 | 0.015281766 |
| ENSG00000169495 | 0.015508462 | 0.025471148 | 0.026598314 | 0.014016519 |
| ENSG00000120235 | 0.014846828 | 0.024723102 | 0.024898027 | 0.014950554 |
| ENSG00000169906 | 0.018315305 | 0.025723194 | 0.024943803 | 0.017044787 |
| ENSG00000101842 | 0.028528561 | 0.030807638 | 0.029262581 | 0.032815459 |
| ENSG00000196664 | 0.049362312 | 0.050537991 | 0.049266214 | 0.047248789 |
| ENSG00000166959 | 0.020791503 | 0.026664502 | 0.025402783 | 0.020140987 |
| ENSG00000184709 | 0.097674489 | 0.083079347 | 0.073743059 | 0.086865571 |
| ENSG00000135148 | 0.0292402   | 0.037315544 | 0.03786352  | 0.03803886  |
| ENSG00000001630 | 0.029637246 | 0.030932077 | 0.032152334 | 0.026625167 |
| ENSG00000121067 | 0.022913987 | 0.031712014 | 0.030083749 | 0.025090106 |
| ENSG00000115425 | 0.035219444 | 0.037601125 | 0.032519104 | 0.029534341 |
| ENSG00000221957 | 0.016569989 | 0.024961194 | 0.024814797 | 0.015558753 |
| ENSG00000197978 | 0.056894551 | 0.047535104 | 0.045679028 | 0.070723592 |
| ENSG00000088888 | 0.026133477 | 0.029948175 | 0.029725987 | 0.0225729   |
| ENSG00000181323 | 0.016303789 | 0.026637716 | 0.025159827 | 0.015432639 |
| ENSG00000128253 | 0.01587144  | 0.024412492 | 0.026084665 | 0.015478904 |
| ENSG00000164109 | 0.039476245 | 0.033055747 | 0.03046293  | 0.030347419 |
| ENSG00000148334 | 0.032651907 | 0.034927982 | 0.031756888 | 0.030567196 |
| ENSG00000087086 | 0.027554069 | 0.028693181 | 0.027528287 | 0.023762912 |
| ENSG00000106113 | 0.015749011 | 0.025258806 | 0.025418507 | 0.017277188 |
| ENSG00000134809 | 0.048302406 | 0.040925418 | 0.051987186 | 0.042521381 |
| ENSG00000062582 | 0.025172026 | 0.027263029 | 0.028865162 | 0.022015912 |
| ENSG00000215712 | 0.021211605 | 0.03019963  | 0.028240799 | 0.020606203 |
| ENSG00000140564 | 0.05055241  | 0.050505074 | 0.05362728  | 0.044690065 |
| ENSG00000003249 | 0.101591275 | 0.075531396 | 0.081757977 | 0.104295643 |
| ENSG00000123636 | 0.043260855 | 0.051711296 | 0.046125379 | 0.045525462 |
| ENSG00000154556 | 0.015550962 | 0.025552633 | 0.025307618 | 0.014776113 |
| ENSG00000171054 | 0.014994343 | 0.024825666 | 0.024472717 | 0.014847769 |
| ENSG00000162836 | 0.054330194 | 0.050032767 | 0.038991606 | 0.040451009 |
| ENSG00000172954 | 0.032516294 | 0.030345457 | 0.032028188 | 0.036844522 |
| ENSG00000213533 | 0.023345146 | 0.030915713 | 0.027091295 | 0.021291235 |
| ENSG00000182149 | 0.024910002 | 0.031398666 | 0.033696674 | 0.021090028 |
| ENSG00000049540 | 0.016263588 | 0.024850708 | 0.024731735 | 0.016034797 |
| ENSG00000107798 | 0.031376809 | 0.033397745 | 0.029457726 | 0.03803298  |
| ENSG00000197279 | 0.054664359 | 0.080651911 | 0.078423615 | 0.053834629 |
| ENSG00000080815 | 0.015967945 | 0.024409557 | 0.024757598 | 0.014925137 |
| ENSG00000196712 | 0.018508103 | 0.026394069 | 0.026689473 | 0.018596365 |
| ENSG00000168630 | 0.087648922 | 0.074639007 | 0.078668719 | 0.080603102 |
| ENSG00000138758 | 0.049342334 | 0.062363976 | 0.052163495 | 0.058784955 |
| ENSG00000204175 | 0.015726641 | 0.025287065 | 0.025519489 | 0.01548411  |

|                 |             |             |             |             |
|-----------------|-------------|-------------|-------------|-------------|
| ENSG00000198157 | 0.017532576 | 0.027295613 | 0.024539573 | 0.01698538  |
| ENSG00000136352 | 0.017680619 | 0.025454238 | 0.02492636  | 0.017470324 |
| ENSG00000168924 | 0.033146027 | 0.03259715  | 0.03178332  | 0.03344891  |
| ENSG00000137877 | 0.015072975 | 0.025296307 | 0.02494654  | 0.015123526 |
| ENSG00000135269 | 0.033416483 | 0.039216388 | 0.033797665 | 0.029767365 |
| ENSG00000186919 | 0.01604428  | 0.024288317 | 0.024317277 | 0.015623423 |
| ENSG00000226288 | 0.015292381 | 0.025544104 | 0.024824415 | 0.014887236 |
| ENSG00000165338 | 0.031102231 | 0.03399872  | 0.028059582 | 0.023267505 |
| ENSG00000196419 | 0.021704356 | 0.027375938 | 0.027922529 | 0.01826701  |
| ENSG00000125505 | 0.025178489 | 0.029711491 | 0.033367638 | 0.031541024 |
| ENSG00000109424 | 0.016808051 | 0.026081355 | 0.026096817 | 0.015539434 |
| ENSG00000120129 | 0.062321385 | 0.047740024 | 0.047742713 | 0.055634705 |
| ENSG00000144711 | 0.038120108 | 0.038178392 | 0.034607104 | 0.033228772 |
| ENSG00000111639 | 0.028595718 | 0.030770688 | 0.029776726 | 0.025281405 |
| ENSG00000198046 | 0.040273225 | 0.037817635 | 0.035684646 | 0.044977019 |
| ENSG00000196511 | 0.055146776 | 0.044869136 | 0.034462364 | 0.036801671 |
| ENSG00000158234 | 0.073031502 | 0.046529666 | 0.051521568 | 0.059608583 |
| ENSG00000127540 | 0.02305819  | 0.028898802 | 0.027374294 | 0.02021377  |
| ENSG00000170037 | 0.029375614 | 0.028427539 | 0.034632212 | 0.024914655 |
| ENSG00000175745 | 0.016682451 | 0.026057274 | 0.024529356 | 0.015733108 |
| ENSG00000180096 | 0.02382097  | 0.029465221 | 0.030519356 | 0.025027504 |
| ENSG00000174953 | 0.028404368 | 0.032984628 | 0.03496496  | 0.027270825 |
| ENSG00000165282 | 0.025974489 | 0.029461988 | 0.028932342 | 0.021236138 |
| ENSG00000125695 | 0.027904753 | 0.033857469 | 0.033457564 | 0.024759946 |
| ENSG00000161381 | 0.015206703 | 0.025635082 | 0.02466705  | 0.015464941 |
| ENSG00000119725 | 0.024187034 | 0.035730849 | 0.037628385 | 0.021493706 |
| ENSG00000155926 | 0.016975954 | 0.027102662 | 0.027142644 | 0.018581089 |
| ENSG00000189046 | 0.029761907 | 0.031262833 | 0.032879651 | 0.026139214 |
| ENSG00000147697 | 0.016085735 | 0.02499743  | 0.025124566 | 0.016168069 |
| ENSG00000182263 | 0.01667663  | 0.026034789 | 0.025789945 | 0.016175015 |
| ENSG00000104369 | 0.015408209 | 0.024174094 | 0.025145408 | 0.015248435 |
| ENSG00000145337 | 0.022847054 | 0.030760957 | 0.029868517 | 0.022934447 |
| ENSG00000183837 | 0.017131446 | 0.026897279 | 0.025927341 | 0.016797663 |
| ENSG00000105135 | 0.031492855 | 0.029480209 | 0.035599825 | 0.021267611 |
| ENSG00000187175 | 0.015208431 | 0.024758966 | 0.024272745 | 0.014913446 |
| ENSG00000142347 | 0.03537187  | 0.035703675 | 0.031089116 | 0.036243769 |
| ENSG00000064999 | 0.033282397 | 0.033662183 | 0.029137974 | 0.025975128 |
| ENSG00000172216 | 0.050480002 | 0.059064321 | 0.056485    | 0.049239401 |
| ENSG00000104894 | 0.024159331 | 0.028099772 | 0.032182716 | 0.028773121 |
| ENSG00000096080 | 0.026747577 | 0.030691763 | 0.031333124 | 0.022948131 |
| ENSG00000188050 | 0.016260395 | 0.024308503 | 0.025437253 | 0.015456291 |
| ENSG00000141448 | 0.032226637 | 0.031848307 | 0.030700617 | 0.020265937 |
| ENSG00000186687 | 0.039985756 | 0.036262747 | 0.041347971 | 0.041468939 |
| ENSG00000108100 | 0.041536768 | 0.041718657 | 0.03947135  | 0.039201547 |
| ENSG00000149932 | 0.024617437 | 0.029906617 | 0.030086267 | 0.029996309 |
| ENSG00000166157 | 0.028297369 | 0.027263925 | 0.02451994  | 0.024709216 |
| ENSG00000077380 | 0.027597417 | 0.034636292 | 0.029253176 | 0.027016483 |
| ENSG00000213762 | 0.026799807 | 0.047427641 | 0.052289374 | 0.032700641 |
| ENSG00000110203 | 0.016390385 | 0.025531365 | 0.025040476 | 0.015516343 |
| ENSG00000146414 | 0.028425184 | 0.035293809 | 0.030259037 | 0.023459813 |
| ENSG00000140832 | 0.016413449 | 0.025552567 | 0.025148418 | 0.015839942 |
| ENSG00000140534 | 0.054416827 | 0.059345334 | 0.041939124 | 0.03861331  |
| ENSG00000148702 | 0.015952484 | 0.024853901 | 0.02453214  | 0.015016662 |
| ENSG00000130741 | 0.026302583 | 0.029489842 | 0.030238295 | 0.023906434 |

|                 |             |             |             |             |
|-----------------|-------------|-------------|-------------|-------------|
| ENSG00000205927 | 0.01650043  | 0.025157595 | 0.025663216 | 0.016601394 |
| ENSG00000188306 | 0.015832235 | 0.025505506 | 0.024488139 | 0.016441996 |
| ENSG00000144228 | 0.037615954 | 0.036605438 | 0.035639141 | 0.039295375 |
| ENSG00000211455 | 0.059227558 | 0.063588483 | 0.057576633 | 0.050398805 |
| ENSG00000129538 | 0.016193659 | 0.025668706 | 0.025163625 | 0.015980684 |
| ENSG00000155256 | 0.017023837 | 0.026732273 | 0.026252528 | 0.021457408 |
| ENSG00000145331 | 0.036587105 | 0.039076091 | 0.03042761  | 0.024915811 |
| ENSG00000166411 | 0.032881844 | 0.03494016  | 0.030722168 | 0.029371796 |
| ENSG00000078808 | 0.017042519 | 0.025767771 | 0.025882691 | 0.018170375 |
| ENSG00000103510 | 0.029278256 | 0.029061882 | 0.031253909 | 0.028005398 |
| ENSG00000157060 | 0.015709733 | 0.024614172 | 0.024556691 | 0.014908781 |
| ENSG00000196757 | 0.029377608 | 0.032942049 | 0.035969365 | 0.024082766 |
| ENSG00000181786 | 0.016007862 | 0.025586801 | 0.024659533 | 0.016011116 |
| ENSG00000109618 | 0.032089724 | 0.034428423 | 0.031177315 | 0.024325054 |
| ENSG00000041880 | 0.037580605 | 0.035539828 | 0.032581514 | 0.037933932 |
| ENSG00000185344 | 0.037473991 | 0.03663827  | 0.037731332 | 0.032455517 |
| ENSG00000007168 | 0.031201269 | 0.039312327 | 0.036111374 | 0.031662369 |
| ENSG00000125255 | 0.045265789 | 0.03040695  | 0.027977262 | 0.021721666 |
| ENSG00000118620 | 0.031141353 | 0.031992779 | 0.034410828 | 0.027885726 |
| ENSG00000134760 | 0.039279633 | 0.024814078 | 0.02500118  | 0.015416154 |
| ENSG00000166363 | 0.017330401 | 0.025908179 | 0.025796851 | 0.016625683 |
| ENSG00000126768 | 0.029472563 | 0.032152994 | 0.031701029 | 0.025331807 |
| ENSG00000176715 | 0.02135407  | 0.139754951 | 0.149019386 | 0.037395516 |
| ENSG00000060491 | 0.027611634 | 0.035756966 | 0.043360639 | 0.026093934 |
| ENSG00000089289 | 0.023289728 | 0.029763613 | 0.029681835 | 0.022485686 |
| ENSG00000138592 | 0.027826537 | 0.035656155 | 0.032321551 | 0.022210701 |
| ENSG00000213047 | 0.016495742 | 0.025344714 | 0.025393414 | 0.015989983 |
| ENSG00000109534 | 0.035507668 | 0.03511993  | 0.033848585 | 0.032643982 |
| ENSG00000185278 | 0.015561647 | 0.02453401  | 0.024454994 | 0.015034286 |
| ENSG00000170426 | 0.014195117 | 0.025625415 | 0.025091758 | 0.01364394  |
| ENSG00000172350 | 0.015666537 | 0.025201209 | 0.025003915 | 0.015372373 |
| ENSG00000108439 | 0.025619502 | 0.030840879 | 0.031045915 | 0.022830945 |
| ENSG00000164609 | 0.025419824 | 0.028587677 | 0.033337129 | 0.024905263 |
| ENSG00000163781 | 0.03444388  | 0.040641181 | 0.032421982 | 0.034159644 |
| ENSG00000088256 | 0.038477184 | 0.038243216 | 0.037235672 | 0.03084552  |
| ENSG00000137273 | 0.015280614 | 0.024811115 | 0.025142609 | 0.014242778 |
| ENSG00000119411 | 0.075948611 | 0.057171015 | 0.061949304 | 0.082992686 |
| ENSG00000184678 | 0.055751603 | 0.051749696 | 0.042952836 | 0.0371419   |
| ENSG00000120784 | 0.015290489 | 0.024854622 | 0.025324793 | 0.016087757 |
| ENSG00000170477 | 0.015972437 | 0.025623666 | 0.024419885 | 0.016402371 |
| ENSG00000139998 | 0.050451647 | 0.060667225 | 0.050904014 | 0.054061582 |
| ENSG00000115808 | 0.017758267 | 0.026969551 | 0.026085263 | 0.019837607 |
| ENSG00000168453 | 0.014378271 | 0.024590855 | 0.024561396 | 0.015804107 |
| ENSG00000088812 | 0.028568508 | 0.036265189 | 0.028966744 | 0.025562237 |
| ENSG00000164136 | 0.01870919  | 0.026215021 | 0.025364317 | 0.018034657 |
| ENSG00000087250 | 0.018808501 | 0.028372045 | 0.025497098 | 0.035706215 |
| ENSG00000165195 | 0.015991711 | 0.024531929 | 0.025285175 | 0.015548609 |
| ENSG00000166118 | 0.024404452 | 0.028553401 | 0.025749318 | 0.02157758  |
| ENSG00000066583 | 0.037451617 | 0.033933148 | 0.033936161 | 0.030974674 |
| ENSG00000164440 | 0.063048361 | 0.045221728 | 0.054818626 | 0.062340464 |
| ENSG00000176555 | 0.016218082 | 0.024902324 | 0.02445684  | 0.014168161 |
| ENSG00000055332 | 0.036652097 | 0.040351368 | 0.035833432 | 0.045815118 |
| ENSG00000073350 | 0.076387596 | 0.063028308 | 0.053070712 | 0.05933898  |
| ENSG00000163885 | 0.016907368 | 0.025506581 | 0.025090717 | 0.015479631 |

|                 |             |             |             |             |
|-----------------|-------------|-------------|-------------|-------------|
| ENSG0000004487  | 0.032545527 | 0.029676354 | 0.028848969 | 0.024294685 |
| ENSG00000106605 | 0.034514046 | 0.033466196 | 0.029725309 | 0.028612743 |
| ENSG00000185825 | 0.024200132 | 0.030369061 | 0.02846248  | 0.02535619  |
| ENSG00000170442 | 0.050264787 | 0.03673347  | 0.03160261  | 0.031269894 |
| ENSG00000147162 | 0.032838593 | 0.034305767 | 0.032442146 | 0.027510939 |
| ENSG00000121769 | 0.113557783 | 0.092609342 | 0.056427038 | 0.102612406 |
| ENSG00000155858 | 0.01583348  | 0.024404881 | 0.025020702 | 0.016287813 |
| ENSG00000187848 | 0.015942897 | 0.024320251 | 0.025232248 | 0.015496146 |
| ENSG00000139988 | 0.014916386 | 0.024187291 | 0.024092899 | 0.014086303 |
| ENSG00000169814 | 0.018721838 | 0.025862591 | 0.0267583   | 0.019714828 |
| ENSG00000105605 | 0.015363369 | 0.025081115 | 0.024943668 | 0.015466932 |
| ENSG00000104722 | 0.018039454 | 0.02576892  | 0.027999612 | 0.015688326 |
| ENSG00000010404 | 0.034862359 | 0.040018712 | 0.038688791 | 0.031114346 |
| ENSG00000148358 | 0.030112418 | 0.031056009 | 0.034286835 | 0.025423026 |
| ENSG00000172375 | 0.025922424 | 0.030149911 | 0.028762619 | 0.020680147 |
| ENSG00000100987 | 0.014543317 | 0.025199822 | 0.025870218 | 0.014487249 |
| ENSG00000204001 | 0.015667008 | 0.025098701 | 0.02652186  | 0.016126601 |
| ENSG00000105122 | 0.034808602 | 0.038736646 | 0.033092425 | 0.02541124  |
| ENSG00000110514 | 0.021153418 | 0.028927347 | 0.028088598 | 0.022630442 |
| ENSG00000149634 | 0.017352912 | 0.026410914 | 0.024802984 | 0.017129338 |
| ENSG00000117091 | 0.021888725 | 0.026417944 | 0.026878996 | 0.019658286 |
| ENSG00000094914 | 0.029048141 | 0.030097965 | 0.031786867 | 0.025456521 |
| ENSG00000184647 | 0.019195943 | 0.025651937 | 0.027797279 | 0.015697828 |
| ENSG00000162148 | 0.024989281 | 0.033984896 | 0.032881997 | 0.029774964 |
| ENSG00000177732 | 0.017069464 | 0.025727243 | 0.025968945 | 0.016928131 |
| ENSG00000149428 | 0.041146308 | 0.040122846 | 0.045482545 | 0.050087277 |
| ENSG00000168004 | 0.015121731 | 0.024315212 | 0.02496818  | 0.014816095 |
| ENSG00000138379 | 0.016120446 | 0.024996862 | 0.026271473 | 0.016542913 |
| ENSG00000113263 | 0.028952963 | 0.040239401 | 0.029591051 | 0.026145247 |
| ENSG00000249992 | 0.052742161 | 0.028949556 | 0.029544561 | 0.048216502 |
| ENSG00000204361 | 0.03559828  | 0.036188616 | 0.033590186 | 0.036087589 |
| ENSG00000118242 | 0.046458948 | 0.045733236 | 0.043480921 | 0.048344827 |
| ENSG00000143093 | 0.016870405 | 0.024913192 | 0.024784775 | 0.015384535 |
| ENSG00000175595 | 0.018603933 | 0.025769185 | 0.026073674 | 0.016961772 |
| ENSG00000105643 | 0.027199792 | 0.031515956 | 0.031419625 | 0.026214225 |
| ENSG00000211448 | 0.015017352 | 0.025057695 | 0.024947584 | 0.014578478 |
| ENSG00000172461 | 0.016980169 | 0.026067062 | 0.025553208 | 0.017924396 |
| ENSG00000021355 | 0.120637366 | 0.077203078 | 0.078506823 | 0.075159895 |
| ENSG00000084754 | 0.028613225 | 0.033742264 | 0.035636218 | 0.025807443 |
| ENSG00000136381 | 0.032987746 | 0.040169272 | 0.034040594 | 0.032116554 |
| ENSG00000138035 | 0.048567115 | 0.04662042  | 0.050784182 | 0.05486405  |
| ENSG00000213203 | 0.050992197 | 0.040311801 | 0.04748033  | 0.055993252 |
| ENSG00000166862 | 0.018791214 | 0.02638295  | 0.026757177 | 0.018699209 |
| ENSG00000157240 | 0.053748691 | 0.053219885 | 0.042761772 | 0.04944155  |
| ENSG00000140382 | 0.027221102 | 0.034158768 | 0.029660706 | 0.022139741 |
| ENSG00000119537 | 0.02344984  | 0.029866595 | 0.029908784 | 0.022495003 |
| ENSG00000105948 | 0.03388391  | 0.034503651 | 0.035605587 | 0.029879722 |
| ENSG00000158485 | 0.015520638 | 0.024886871 | 0.024355863 | 0.014257587 |
| ENSG00000170374 | 0.017178721 | 0.025384967 | 0.02469156  | 0.017047817 |
| ENSG00000204219 | 0.016658671 | 0.025566543 | 0.026937797 | 0.015215037 |
| ENSG00000156928 | 0.021035457 | 0.02731816  | 0.028233336 | 0.01903319  |
| ENSG00000121797 | 0.065542455 | 0.057581677 | 0.047730838 | 0.058352182 |
| ENSG00000164736 | 0.016886145 | 0.024643814 | 0.024380456 | 0.014836381 |
| ENSG00000115207 | 0.021034428 | 0.028279852 | 0.029362084 | 0.022731891 |

|                 |             |             |             |             |
|-----------------|-------------|-------------|-------------|-------------|
| ENSG00000171243 | 0.017529231 | 0.026981429 | 0.026422817 | 0.018752687 |
| ENSG00000138271 | 0.019268008 | 0.025328926 | 0.024447549 | 0.019158661 |
| ENSG00000120088 | 0.01702678  | 0.025236703 | 0.025287343 | 0.015613502 |
| ENSG00000169217 | 0.030160161 | 0.03292443  | 0.036636192 | 0.02643696  |
| ENSG00000143379 | 0.020560658 | 0.030610701 | 0.027280833 | 0.022413137 |
| ENSG00000134419 | 0.026147479 | 0.028229032 | 0.027799612 | 0.026528554 |
| ENSG00000115694 | 0.035660937 | 0.041214341 | 0.040954622 | 0.024755124 |
| ENSG00000196132 | 0.018971644 | 0.027566911 | 0.027572945 | 0.020619877 |
| ENSG00000148925 | 0.026802843 | 0.035817985 | 0.031394102 | 0.023617166 |
| ENSG00000007202 | 0.033199289 | 0.032667058 | 0.029933114 | 0.030253756 |
| ENSG00000113384 | 0.02450509  | 0.035258379 | 0.034639395 | 0.021768012 |
| ENSG00000125870 | 0.025792614 | 0.030995313 | 0.028213919 | 0.026270287 |
| ENSG00000197429 | 0.034821591 | 0.038149003 | 0.038454638 | 0.024135798 |
| ENSG00000136261 | 0.078272903 | 0.078887097 | 0.067473353 | 0.076369357 |
| ENSG00000179922 | 0.026300899 | 0.033004631 | 0.031910436 | 0.025835069 |
| ENSG00000143970 | 0.028121307 | 0.035614486 | 0.029535472 | 0.029804829 |
| ENSG00000141101 | 0.024558377 | 0.029830874 | 0.032611952 | 0.023160701 |
| ENSG00000176641 | 0.017957602 | 0.026411074 | 0.027595424 | 0.016186823 |
| ENSG00000134571 | 0.015654395 | 0.025330621 | 0.026191695 | 0.015492762 |
| ENSG00000169727 | 0.02843617  | 0.031296837 | 0.030117687 | 0.025095912 |
| ENSG00000123143 | 0.023491125 | 0.031047744 | 0.031958307 | 0.031348566 |
| ENSG00000184232 | 0.045247691 | 0.057099998 | 0.068181459 | 0.073110911 |
| ENSG00000066056 | 0.022424777 | 0.0256813   | 0.025393438 | 0.026584224 |
| ENSG00000163554 | 0.016743302 | 0.026497853 | 0.0259451   | 0.015933707 |
| ENSG00000204438 | 0.027145911 | 0.029966432 | 0.029463452 | 0.022433603 |
| ENSG00000142892 | 0.036310674 | 0.039974402 | 0.032630964 | 0.028811726 |
| ENSG00000111224 | 0.027533722 | 0.037644784 | 0.035218194 | 0.021450453 |
| ENSG00000135929 | 0.082199206 | 0.059441825 | 0.042037808 | 0.075686808 |
| ENSG00000164403 | 0.022519257 | 0.031827067 | 0.028735519 | 0.02182502  |
| ENSG00000203859 | 0.015316703 | 0.024351424 | 0.024248131 | 0.014910716 |
| ENSG00000170396 | 0.039056997 | 0.033750256 | 0.029574642 | 0.024605584 |
| ENSG00000184613 | 0.016428327 | 0.026492143 | 0.025635274 | 0.016264191 |
| ENSG00000171360 | 0.014498046 | 0.025826385 | 0.025167482 | 0.01593599  |
| ENSG00000146755 | 0.015708676 | 0.025346374 | 0.02397241  | 0.014722461 |
| ENSG00000105426 | 0.019421216 | 0.02640431  | 0.026354309 | 0.015894844 |
| ENSG00000174238 | 0.038121171 | 0.033782378 | 0.033168957 | 0.033857155 |
| ENSG00000181631 | 0.019155794 | 0.024907026 | 0.025946342 | 0.015428602 |
| ENSG00000138593 | 0.030980141 | 0.033957921 | 0.036574747 | 0.027754516 |
| ENSG00000139163 | 0.036766158 | 0.043622666 | 0.036651555 | 0.029516202 |
| ENSG00000204711 | 0.015296058 | 0.02427431  | 0.025025556 | 0.014998111 |
| ENSG00000138138 | 0.028444648 | 0.03467128  | 0.033083835 | 0.033437076 |
| ENSG00000169379 | 0.017359113 | 0.026936872 | 0.02493451  | 0.01528066  |
| ENSG00000143632 | 0.015956694 | 0.026823324 | 0.026582737 | 0.01724348  |
| ENSG00000242265 | 0.07439448  | 0.068637519 | 0.060130774 | 0.067418472 |
| ENSG00000105401 | 0.024155055 | 0.028487331 | 0.030520338 | 0.022881529 |
| ENSG00000139292 | 0.016842804 | 0.025400787 | 0.025906499 | 0.017001958 |
| ENSG00000135521 | 0.033001975 | 0.039105507 | 0.042049604 | 0.038501739 |
| ENSG00000112936 | 0.015493444 | 0.025022096 | 0.024238056 | 0.015530967 |
| ENSG00000120992 | 0.032873903 | 0.045309129 | 0.038906743 | 0.032343844 |
| ENSG00000122728 | 0.035040416 | 0.042695427 | 0.038737405 | 0.035070084 |
| ENSG00000037241 | 0.024550564 | 0.029065723 | 0.026605547 | 0.02439379  |
| ENSG00000182782 | 0.018300914 | 0.025511009 | 0.025850783 | 0.016341786 |
| ENSG00000168298 | 0.050521798 | 0.034163713 | 0.037624451 | 0.045264404 |
| ENSG00000198570 | 0.017275338 | 0.025454396 | 0.028094137 | 0.016935186 |

|                 |             |             |             |             |
|-----------------|-------------|-------------|-------------|-------------|
| ENSG00000101445 | 0.031796932 | 0.035045851 | 0.033977359 | 0.026383137 |
| ENSG00000147789 | 0.02302032  | 0.034759283 | 0.038241247 | 0.022436834 |
| ENSG00000106852 | 0.015963177 | 0.024260703 | 0.024529276 | 0.013985368 |
| ENSG00000253767 | 0.017125178 | 0.025173991 | 0.024402287 | 0.015162843 |
| ENSG00000149564 | 0.084313037 | 0.066364998 | 0.051538323 | 0.057369559 |
| ENSG00000185972 | 0.015837974 | 0.025419984 | 0.02504116  | 0.015494691 |
| ENSG00000131482 | 0.015533067 | 0.024735463 | 0.025647075 | 0.015455733 |
| ENSG00000108423 | 0.031518708 | 0.036906851 | 0.030929081 | 0.029957905 |
| ENSG00000114648 | 0.017094394 | 0.025561647 | 0.025589031 | 0.016222383 |
| ENSG00000079950 | 0.038092065 | 0.041028892 | 0.034701894 | 0.03613024  |
| ENSG00000105219 | 0.015278299 | 0.025537599 | 0.024518523 | 0.016007131 |
| ENSG00000120162 | 0.082303272 | 0.059983534 | 0.051053657 | 0.064755751 |
| ENSG00000083782 | 0.014758318 | 0.024399746 | 0.024882475 | 0.015053482 |
| ENSG00000071994 | 0.033568483 | 0.036089924 | 0.041745804 | 0.036212882 |
| ENSG00000124491 | 0.144034104 | 0.116946196 | 0.120419281 | 0.137389944 |
| ENSG00000163513 | 0.016304888 | 0.025814781 | 0.02608555  | 0.016213072 |
| ENSG00000168734 | 0.0711144   | 0.072864187 | 0.054697434 | 0.068329358 |
| ENSG00000110917 | 0.034741423 | 0.035370019 | 0.030222482 | 0.024569156 |
| ENSG00000090382 | 0.016833033 | 0.025690361 | 0.025451857 | 0.015586176 |
| ENSG00000115365 | 0.035144571 | 0.037442958 | 0.032971785 | 0.028911631 |
| ENSG00000198948 | 0.013842977 | 0.023658472 | 0.023673363 | 0.013052373 |
| ENSG00000146376 | 0.060294666 | 0.047108178 | 0.037135618 | 0.039692136 |
| ENSG00000114767 | 0.034804942 | 0.032075733 | 0.037001128 | 0.034075872 |
| ENSG00000164434 | 0.018280347 | 0.025049926 | 0.024527222 | 0.01507224  |
| ENSG00000118473 | 0.015356492 | 0.02451021  | 0.024208859 | 0.016061737 |
| ENSG00000175707 | 0.01977688  | 0.025515253 | 0.027750693 | 0.014759624 |
| ENSG00000117013 | 0.016390187 | 0.026111745 | 0.024998379 | 0.016096039 |
| ENSG00000221949 | 0.022058818 | 0.029407515 | 0.030464005 | 0.024065054 |
| ENSG00000198932 | 0.03289385  | 0.032058363 | 0.035508379 | 0.031272334 |
| ENSG00000122025 | 0.020022074 | 0.025588803 | 0.025543091 | 0.016985388 |
| ENSG00000230666 | 0.018870453 | 0.024448939 | 0.025909132 | 0.018251394 |
| ENSG00000105281 | 0.032919511 | 0.032849537 | 0.036280542 | 0.033127524 |
| ENSG00000147174 | 0.030962826 | 0.044957148 | 0.038286904 | 0.039827207 |
| ENSG00000110013 | 0.038895108 | 0.041316782 | 0.035118005 | 0.029839969 |
| ENSG00000104833 | 0.021614101 | 0.028935096 | 0.02676727  | 0.022248002 |
| ENSG00000166263 | 0.0365254   | 0.032250136 | 0.031523838 | 0.029657858 |
| ENSG00000103429 | 0.026968172 | 0.032577911 | 0.028839239 | 0.020914317 |
| ENSG00000130309 | 0.032706305 | 0.029119098 | 0.034993001 | 0.028665638 |
| ENSG00000120915 | 0.068119425 | 0.055793556 | 0.046923554 | 0.06845532  |
| ENSG00000068305 | 0.032304685 | 0.033083877 | 0.043235478 | 0.031608323 |
| ENSG00000240682 | 0.025287565 | 0.033293792 | 0.032171509 | 0.019346775 |
| ENSG00000103876 | 0.043849192 | 0.046596358 | 0.046898052 | 0.03830277  |
| ENSG00000186001 | 0.027254016 | 0.035186906 | 0.028433083 | 0.025129047 |
| ENSG00000179449 | 0.027930675 | 0.032186907 | 0.037432603 | 0.020971857 |
| ENSG00000170054 | 0.033937864 | 0.028236674 | 0.025581291 | 0.026015165 |
| ENSG00000204099 | 0.026012139 | 0.035365467 | 0.027557616 | 0.022638122 |
| ENSG00000241878 | 0.024000104 | 0.03334109  | 0.034126924 | 0.02703881  |
| ENSG00000176256 | 0.017283946 | 0.02442365  | 0.025009707 | 0.015640396 |
| ENSG00000204193 | 0.015666491 | 0.024669262 | 0.024367473 | 0.014458665 |
| ENSG00000167701 | 0.019378316 | 0.026602502 | 0.025568258 | 0.017193329 |
| ENSG00000134259 | 0.017924471 | 0.025984865 | 0.026328833 | 0.016496934 |
| ENSG00000167925 | 0.029550711 | 0.032372717 | 0.039447668 | 0.028220329 |
| ENSG00000158062 | 0.015495454 | 0.025706472 | 0.02455301  | 0.01574918  |
| ENSG00000167600 | 0.019005335 | 0.031502253 | 0.027358338 | 0.017933155 |



|                 |             |             |             |             |
|-----------------|-------------|-------------|-------------|-------------|
| ENSG00000105289 | 0.017265907 | 0.026604457 | 0.027498765 | 0.017390774 |
| ENSG00000180891 | 0.05172373  | 0.058994957 | 0.036857953 | 0.036698511 |
| ENSG00000196475 | 0.015856498 | 0.025776906 | 0.024293765 | 0.014856293 |
| ENSG00000140104 | 0.027499549 | 0.027861929 | 0.028989461 | 0.029503697 |
| ENSG00000112053 | 0.015288036 | 0.025316813 | 0.024861946 | 0.014409338 |
| ENSG00000132463 | 0.032721091 | 0.03473502  | 0.030821964 | 0.027959923 |
| ENSG00000165923 | 0.034561413 | 0.03600557  | 0.029781351 | 0.032081178 |
| ENSG00000178177 | 0.02384155  | 0.033212773 | 0.029858378 | 0.024090991 |
| ENSG00000164953 | 0.015146628 | 0.024567467 | 0.025195683 | 0.014448556 |
| ENSG00000196876 | 0.018117472 | 0.027394244 | 0.026266991 | 0.016173094 |
| ENSG00000175097 | 0.016738245 | 0.024977949 | 0.025320234 | 0.015518351 |
| ENSG00000204673 | 0.026582788 | 0.029245537 | 0.031499484 | 0.025164194 |
| ENSG00000156587 | 0.015956413 | 0.025915144 | 0.025294462 | 0.014514325 |
| ENSG00000177628 | 0.036967615 | 0.033638944 | 0.029639342 | 0.031016657 |
| ENSG00000205209 | 0.016245763 | 0.024536151 | 0.02570876  | 0.01520485  |
| ENSG00000127507 | 0.062943646 | 0.058060094 | 0.061649267 | 0.072718488 |
| ENSG00000155438 | 0.031875101 | 0.036623588 | 0.03847574  | 0.03391175  |
| ENSG00000072210 | 0.053786649 | 0.041413332 | 0.042988207 | 0.034248479 |
| ENSG00000149609 | 0.016633505 | 0.02478318  | 0.024450001 | 0.016451929 |
| ENSG00000090674 | 0.024248935 | 0.031124833 | 0.031180508 | 0.022225117 |
| ENSG00000184432 | 0.028211125 | 0.035046214 | 0.03285936  | 0.023327618 |
| ENSG00000174059 | 0.015579128 | 0.025452809 | 0.024679797 | 0.015873234 |
| ENSG00000108797 | 0.059949978 | 0.050915247 | 0.04637542  | 0.047996898 |
| ENSG00000111669 | 0.026804794 | 0.030657484 | 0.030229781 | 0.022164141 |
| ENSG00000197024 | 0.031234202 | 0.039879553 | 0.042669811 | 0.029809465 |
| ENSG00000169976 | 0.023165245 | 0.027037856 | 0.027047925 | 0.019295783 |
| ENSG00000113734 | 0.025003475 | 0.033614446 | 0.036266961 | 0.024492508 |
| ENSG00000181894 | 0.040136921 | 0.049629568 | 0.051131937 | 0.033818426 |
| ENSG00000168515 | 0.015825193 | 0.024845199 | 0.024302591 | 0.015482133 |
| ENSG00000108823 | 0.018955415 | 0.026585278 | 0.025976371 | 0.019347041 |
| ENSG00000127951 | 0.056332093 | 0.067540963 | 0.052457466 | 0.054071891 |
| ENSG00000173141 | 0.026197634 | 0.028496006 | 0.031562384 | 0.022731121 |
| ENSG00000082196 | 0.017257712 | 0.026045045 | 0.024280596 | 0.017557685 |
| ENSG00000141542 | 0.047919425 | 0.048316742 | 0.047861828 | 0.04632723  |
| ENSG00000134291 | 0.041167029 | 0.040072502 | 0.03350589  | 0.027694832 |
| ENSG00000178700 | 0.029367122 | 0.030634422 | 0.025798518 | 0.028807093 |
| ENSG00000176956 | 0.015038732 | 0.025143689 | 0.025006609 | 0.015266815 |
| ENSG00000103495 | 0.033785907 | 0.051190526 | 0.042033486 | 0.037308695 |
| ENSG00000167840 | 0.041929202 | 0.039637344 | 0.032736508 | 0.027980208 |
| ENSG00000186812 | 0.020576896 | 0.029159385 | 0.026835575 | 0.018500977 |
| ENSG00000134001 | 0.038670815 | 0.046824704 | 0.056903728 | 0.064371562 |
| ENSG00000054938 | 0.01560218  | 0.025382279 | 0.025091825 | 0.016626842 |
| ENSG00000204969 | 0.018349313 | 0.025258501 | 0.025635106 | 0.017376362 |
| ENSG00000116161 | 0.024129067 | 0.028742344 | 0.028750566 | 0.01866341  |
| ENSG00000112339 | 0.032782059 | 0.030864739 | 0.032977338 | 0.028443415 |
| ENSG00000166228 | 0.039359399 | 0.034860133 | 0.03308395  | 0.030137229 |
| ENSG00000185477 | 0.028148207 | 0.032051353 | 0.034160122 | 0.035022365 |
| ENSG00000133980 | 0.015285929 | 0.024981946 | 0.026366891 | 0.014963104 |
| ENSG00000167981 | 0.022030816 | 0.033368322 | 0.038604816 | 0.022362742 |
| ENSG00000123572 | 0.013776462 | 0.02480477  | 0.024298611 | 0.014844685 |
| ENSG00000164627 | 0.022271584 | 0.025810908 | 0.025822256 | 0.015956742 |
| ENSG00000158717 | 0.02929815  | 0.037139702 | 0.034147665 | 0.024716826 |
| ENSG00000173812 | 0.029011197 | 0.036732237 | 0.0354866   | 0.024436293 |
| ENSG00000171757 | 0.074290476 | 0.0569148   | 0.050673729 | 0.057248669 |

|                 |             |             |             |             |
|-----------------|-------------|-------------|-------------|-------------|
| ENSG00000197852 | 0.026974981 | 0.031311924 | 0.027357769 | 0.02114165  |
| ENSG00000169609 | 0.031585556 | 0.036465851 | 0.033251505 | 0.02596209  |
| ENSG00000172171 | 0.028748762 | 0.03635786  | 0.031689997 | 0.024144972 |
| ENSG00000175395 | 0.041629743 | 0.04028358  | 0.040261229 | 0.034119842 |
| ENSG00000143570 | 0.027916371 | 0.031371163 | 0.032332479 | 0.027820501 |
| ENSG00000075234 | 0.03116708  | 0.030771489 | 0.034605308 | 0.043268164 |
| ENSG00000138639 | 0.028035824 | 0.030122111 | 0.025598206 | 0.031701086 |
| ENSG00000177519 | 0.039287553 | 0.026058299 | 0.024168199 | 0.028620011 |
| ENSG00000115239 | 0.037141429 | 0.057762424 | 0.039818591 | 0.048178667 |
| ENSG00000119922 | 0.058907196 | 0.061160924 | 0.049774684 | 0.064509839 |
| ENSG00000067066 | 0.026774346 | 0.027687314 | 0.028061264 | 0.021106603 |
| ENSG00000137776 | 0.030392757 | 0.036664271 | 0.031695581 | 0.025594626 |
| ENSG00000171954 | 0.015417928 | 0.02645534  | 0.025048834 | 0.015218499 |
| ENSG00000164258 | 0.01875174  | 0.027024295 | 0.028659752 | 0.019390253 |
| ENSG00000176871 | 0.029316186 | 0.031221024 | 0.030421698 | 0.026683725 |
| ENSG00000187109 | 0.027646022 | 0.037350505 | 0.02981843  | 0.025387632 |
| ENSG00000009709 | 0.015669492 | 0.025365372 | 0.026222499 | 0.015924676 |
| ENSG00000167325 | 0.032032465 | 0.033646529 | 0.028770866 | 0.024000606 |
| ENSG00000125831 | 0.014927859 | 0.024676037 | 0.02467249  | 0.015464323 |
| ENSG00000241794 | 0.020190562 | 0.028199799 | 0.024933084 | 0.015220738 |
| ENSG00000114529 | 0.048784805 | 0.042147292 | 0.039686976 | 0.058936971 |
| ENSG00000005243 | 0.03213799  | 0.026863335 | 0.032417239 | 0.026621531 |
| ENSG00000174100 | 0.02411375  | 0.029466273 | 0.027633239 | 0.024453927 |
| ENSG00000085788 | 0.031606458 | 0.035088549 | 0.031624975 | 0.024124802 |
| ENSG00000116337 | 0.015820369 | 0.024731033 | 0.025143475 | 0.014475745 |
| ENSG00000135441 | 0.028965397 | 0.027597664 | 0.029640239 | 0.023304931 |
| ENSG00000147724 | 0.014872072 | 0.025469149 | 0.02467842  | 0.014620805 |
| ENSG00000109906 | 0.017876805 | 0.02621694  | 0.026261061 | 0.016287296 |
| ENSG00000131477 | 0.015916236 | 0.026057603 | 0.024044212 | 0.016374961 |
| ENSG00000111321 | 0.063563177 | 0.051064003 | 0.054717246 | 0.037853588 |
| ENSG00000164172 | 0.033665216 | 0.036800236 | 0.03242382  | 0.026899679 |
| ENSG00000146013 | 0.016478865 | 0.025476165 | 0.02521889  | 0.015390908 |
| ENSG00000162551 | 0.044403279 | 0.045235002 | 0.029264904 | 0.020961943 |
| ENSG00000159650 | 0.015419581 | 0.023936959 | 0.024369002 | 0.014378023 |
| ENSG00000130414 | 0.023967994 | 0.028639519 | 0.028340119 | 0.024159865 |
| ENSG00000144852 | 0.013936821 | 0.024746234 | 0.025061609 | 0.014686615 |
| ENSG00000254245 | 0.018438312 | 0.025678497 | 0.024766023 | 0.017367242 |
| ENSG00000106089 | 0.033519727 | 0.04221575  | 0.03701291  | 0.03992404  |
| ENSG00000140632 | 0.02658055  | 0.035087044 | 0.030352518 | 0.023357225 |
| ENSG00000160949 | 0.024989977 | 0.029720609 | 0.02769312  | 0.022998425 |
| ENSG00000162976 | 0.053772854 | 0.038847157 | 0.04496969  | 0.040555982 |
| ENSG00000171489 | 0.015988596 | 0.025147977 | 0.024523299 | 0.015266932 |
| ENSG00000188488 | 0.016338968 | 0.025053538 | 0.025546415 | 0.015213974 |
| ENSG00000101276 | 0.015322929 | 0.024477392 | 0.024817132 | 0.015288384 |
| ENSG00000102349 | 0.052088863 | 0.047704246 | 0.044555716 | 0.049012833 |
| ENSG00000015153 | 0.029075437 | 0.035466418 | 0.033438556 | 0.023096217 |
| ENSG00000023909 | 0.040810736 | 0.03632372  | 0.035620653 | 0.035331025 |
| ENSG00000088992 | 0.116377925 | 0.068635571 | 0.063723498 | 0.067698054 |
| ENSG00000138696 | 0.016634553 | 0.024794458 | 0.024818276 | 0.016861752 |
| ENSG00000127663 | 0.027964005 | 0.034152887 | 0.033544741 | 0.02505293  |
| ENSG00000184221 | 0.01860519  | 0.028308505 | 0.026003376 | 0.018759065 |
| ENSG00000182985 | 0.148513451 | 0.097139258 | 0.08037484  | 0.125903436 |
| ENSG00000172922 | 0.029913429 | 0.031605382 | 0.030320777 | 0.026549386 |
| ENSG00000144231 | 0.029305971 | 0.033796144 | 0.040504159 | 0.026079264 |

|                 |             |             |             |             |
|-----------------|-------------|-------------|-------------|-------------|
| ENSG00000173581 | 0.033289427 | 0.040121112 | 0.030823851 | 0.031525623 |
| ENSG00000198028 | 0.015801478 | 0.025118023 | 0.02560399  | 0.014067557 |
| ENSG00000198300 | 0.015209402 | 0.024897623 | 0.024429149 | 0.014613367 |
| ENSG00000166451 | 0.041491261 | 0.042808061 | 0.047652981 | 0.041160265 |
| ENSG00000170854 | 0.016376617 | 0.025606235 | 0.025056087 | 0.015155096 |
| ENSG00000172009 | 0.025476114 | 0.030900419 | 0.032474386 | 0.028935666 |
| ENSG00000197417 | 0.035384855 | 0.033218612 | 0.035984992 | 0.026978124 |
| ENSG00000013725 | 0.018180326 | 0.026417495 | 0.025048637 | 0.018300602 |
| ENSG00000127124 | 0.020056364 | 0.027313107 | 0.026069167 | 0.018173319 |
| ENSG00000127528 | 0.06324398  | 0.056554361 | 0.057900723 | 0.074763604 |
| ENSG00000198142 | 0.07424847  | 0.054596328 | 0.050243187 | 0.065417229 |
| ENSG00000073008 | 0.019925683 | 0.026276974 | 0.025434676 | 0.020056203 |
| ENSG00000099797 | 0.036100469 | 0.032624284 | 0.032083247 | 0.025829877 |
| ENSG00000159131 | 0.036056597 | 0.038332253 | 0.031925536 | 0.030839926 |
| ENSG00000075429 | 0.016178555 | 0.0256213   | 0.025045043 | 0.015041226 |
| ENSG00000121897 | 0.030898272 | 0.034075855 | 0.033126531 | 0.024957758 |
| ENSG00000175550 | 0.027982767 | 0.031722193 | 0.031549563 | 0.024907029 |
| ENSG00000114126 | 0.037688481 | 0.037297043 | 0.035599727 | 0.039681599 |
| ENSG00000111364 | 0.028262159 | 0.029383101 | 0.031578063 | 0.02657793  |
| ENSG00000132300 | 0.028998747 | 0.033670057 | 0.032751624 | 0.023812621 |
| ENSG00000153201 | 0.038524525 | 0.036813121 | 0.040766074 | 0.03354417  |
| ENSG00000105647 | 0.016919803 | 0.025642457 | 0.025611669 | 0.015763083 |
| ENSG00000166478 | 0.025189691 | 0.029194618 | 0.029968786 | 0.020909143 |
| ENSG00000241962 | 0.029372901 | 0.030840648 | 0.033153168 | 0.028667459 |
| ENSG00000166289 | 0.04206034  | 0.040274537 | 0.033956116 | 0.033932786 |
| ENSG00000046604 | 0.064039951 | 0.044527388 | 0.037697999 | 0.044056744 |
| ENSG00000101134 | 0.017188432 | 0.024494795 | 0.025297588 | 0.015711368 |
| ENSG00000159763 | 0.014502767 | 0.023838463 | 0.024882652 | 0.015471821 |
| ENSG00000138675 | 0.018617576 | 0.024163241 | 0.024470138 | 0.014369031 |
| ENSG00000082146 | 0.052016432 | 0.056796066 | 0.055615852 | 0.045846974 |
| ENSG00000198521 | 0.045076126 | 0.041744539 | 0.032539646 | 0.047293708 |
| ENSG00000253485 | 0.016651377 | 0.02680351  | 0.025177802 | 0.017280259 |
| ENSG00000139547 | 0.017672939 | 0.024775329 | 0.026532516 | 0.018780531 |
| ENSG00000164512 | 0.022264119 | 0.026193408 | 0.025959864 | 0.016014894 |
| ENSG00000180448 | 0.030657414 | 0.034462028 | 0.035661474 | 0.032886456 |
| ENSG00000102858 | 0.024316451 | 0.035140833 | 0.045663734 | 0.032611037 |
| ENSG00000197386 | 0.02736149  | 0.030223524 | 0.031394382 | 0.025792909 |
| ENSG00000084734 | 0.015441709 | 0.02441837  | 0.025288815 | 0.014945051 |
| ENSG00000198443 | 0.017259854 | 0.024831795 | 0.026209173 | 0.017247253 |
| ENSG00000187553 | 0.01629922  | 0.02567229  | 0.024969834 | 0.015397616 |
| ENSG00000128394 | 0.029832979 | 0.038652623 | 0.029068996 | 0.028818364 |
| ENSG00000114423 | 0.057028252 | 0.040252146 | 0.049354923 | 0.046909183 |
| ENSG00000095587 | 0.016997554 | 0.025842766 | 0.024863172 | 0.015161102 |
| ENSG00000169738 | 0.030778358 | 0.032197487 | 0.032479916 | 0.031571976 |
| ENSG00000110066 | 0.03836887  | 0.044760659 | 0.045798648 | 0.044429071 |
| ENSG00000155962 | 0.106961183 | 0.081378577 | 0.073172556 | 0.099163026 |
| ENSG00000157911 | 0.014471514 | 0.025638444 | 0.024887059 | 0.016584102 |
| ENSG00000169184 | 0.015209092 | 0.025093449 | 0.02594372  | 0.015854289 |
| ENSG00000134769 | 0.028455916 | 0.026163757 | 0.026908771 | 0.017357814 |
| ENSG00000143375 | 0.083943193 | 0.077838653 | 0.062956714 | 0.082271337 |
| ENSG00000137812 | 0.015463124 | 0.024650363 | 0.02635019  | 0.014343745 |
| ENSG00000165164 | 0.015426449 | 0.025352547 | 0.024284948 | 0.016092468 |
| ENSG00000101311 | 0.083182091 | 0.062421343 | 0.031929806 | 0.050021627 |
| ENSG00000196353 | 0.030822232 | 0.026342984 | 0.027257036 | 0.019432174 |

|                 |             |             |             |             |
|-----------------|-------------|-------------|-------------|-------------|
| ENSG00000081721 | 0.028400018 | 0.032376253 | 0.034826596 | 0.029567955 |
| ENSG00000119396 | 0.019159606 | 0.025122821 | 0.025048918 | 0.016417811 |
| ENSG00000102931 | 0.030508735 | 0.036055042 | 0.035755541 | 0.028877275 |
| ENSG00000170236 | 0.01907992  | 0.025323988 | 0.025289096 | 0.015753574 |
| ENSG00000162300 | 0.0293286   | 0.031789168 | 0.033653942 | 0.022209348 |
| ENSG00000205838 | 0.015699614 | 0.025515416 | 0.024402381 | 0.014598003 |
| ENSG00000137825 | 0.046781344 | 0.052803248 | 0.038721559 | 0.035768158 |
| ENSG00000111911 | 0.031348365 | 0.038250222 | 0.031580656 | 0.024717132 |
| ENSG00000125347 | 0.037368451 | 0.036267368 | 0.0415854   | 0.030554926 |
| ENSG00000123096 | 0.040153033 | 0.048328445 | 0.036766507 | 0.035041181 |
| ENSG00000175221 | 0.028817616 | 0.030633393 | 0.039374824 | 0.025991239 |
| ENSG00000091138 | 0.016484157 | 0.025599397 | 0.024745853 | 0.016332081 |
| ENSG00000151413 | 0.032472588 | 0.034352305 | 0.032546959 | 0.033726893 |
| ENSG00000119125 | 0.022597424 | 0.035916102 | 0.034109766 | 0.034403799 |
| ENSG00000101187 | 0.054748918 | 0.04600905  | 0.039396968 | 0.036870926 |
| ENSG00000128594 | 0.015671184 | 0.026608823 | 0.025291269 | 0.014908126 |
| ENSG00000156463 | 0.016075003 | 0.025312397 | 0.025725423 | 0.015645087 |
| ENSG00000163354 | 0.015448704 | 0.024274266 | 0.02439179  | 0.015390039 |
| ENSG00000173868 | 0.016293056 | 0.025310741 | 0.024697791 | 0.015229859 |
| ENSG00000108846 | 0.024732883 | 0.025861098 | 0.025989689 | 0.02014302  |
| ENSG00000114354 | 0.024832697 | 0.029928845 | 0.031132894 | 0.024033191 |
| ENSG00000101213 | 0.016661171 | 0.024632709 | 0.025590229 | 0.016068837 |
| ENSG00000133424 | 0.098416105 | 0.072921533 | 0.075311373 | 0.072203563 |
| ENSG00000143653 | 0.038652029 | 0.054376673 | 0.045844069 | 0.051891418 |
| ENSG00000124159 | 0.017900512 | 0.025361621 | 0.026334489 | 0.017975003 |
| ENSG00000181803 | 0.016720095 | 0.025205556 | 0.024550774 | 0.016289563 |
| ENSG00000168481 | 0.014832441 | 0.025774123 | 0.025033244 | 0.014316569 |
| ENSG00000127415 | 0.031189423 | 0.036037951 | 0.034146828 | 0.032887138 |
| ENSG00000172775 | 0.033333058 | 0.037953355 | 0.035976985 | 0.030815807 |
| ENSG00000091640 | 0.024364413 | 0.028638929 | 0.032370598 | 0.024097911 |
| ENSG00000106049 | 0.04009489  | 0.038912803 | 0.034125957 | 0.032746073 |
| ENSG00000169469 | 0.017354087 | 0.025929959 | 0.026267081 | 0.018351308 |
| ENSG00000174720 | 0.025278902 | 0.033355364 | 0.030568937 | 0.02154075  |
| ENSG00000198515 | 0.015343368 | 0.025379153 | 0.024573336 | 0.015710625 |
| ENSG00000123901 | 0.015293092 | 0.025495518 | 0.02518862  | 0.01534628  |
| ENSG00000152990 | 0.090869641 | 0.075173614 | 0.035394387 | 0.038456484 |
| ENSG00000123595 | 0.0352567   | 0.036031905 | 0.033857118 | 0.030247291 |
| ENSG00000136045 | 0.02296633  | 0.02860276  | 0.030323895 | 0.020074817 |
| ENSG00000164366 | 0.026198115 | 0.027492337 | 0.030166311 | 0.022106846 |
| ENSG00000196154 | 0.106808346 | 0.070369602 | 0.055627671 | 0.096317242 |
| ENSG00000139220 | 0.015703792 | 0.025347099 | 0.025231623 | 0.015183138 |
| ENSG00000010539 | 0.016611621 | 0.02534948  | 0.025857506 | 0.015145649 |
| ENSG00000167460 | 0.027011594 | 0.028440929 | 0.037089039 | 0.037563918 |
| ENSG00000251247 | 0.020167526 | 0.030012146 | 0.027992492 | 0.023570333 |
| ENSG00000196914 | 0.028732354 | 0.031006412 | 0.028632309 | 0.023094278 |
| ENSG00000012048 | 0.048776909 | 0.055460085 | 0.04259675  | 0.036771638 |
| ENSG00000164815 | 0.019225922 | 0.026689436 | 0.025179891 | 0.020135138 |
| ENSG00000089225 | 0.016618779 | 0.025848877 | 0.025063943 | 0.015527008 |
| ENSG00000196275 | 0.034018996 | 0.028445276 | 0.029913068 | 0.029430483 |
| ENSG00000165521 | 0.016417991 | 0.026115115 | 0.025709172 | 0.016364312 |
| ENSG00000184517 | 0.029586102 | 0.035720874 | 0.033262811 | 0.030562527 |
| ENSG00000100811 | 0.023595955 | 0.031541505 | 0.03017174  | 0.019041048 |
| ENSG00000171940 | 0.034417829 | 0.039791732 | 0.036238574 | 0.030591224 |
| ENSG00000161021 | 0.032004235 | 0.037807555 | 0.039591353 | 0.026706063 |

|                 |             |             |             |             |
|-----------------|-------------|-------------|-------------|-------------|
| ENSG00000151702 | 0.046773237 | 0.045980666 | 0.035953171 | 0.032242359 |
| ENSG00000138448 | 0.015872329 | 0.024276479 | 0.024980461 | 0.016150008 |
| ENSG00000113048 | 0.027937479 | 0.031789723 | 0.032259507 | 0.02735072  |
| ENSG00000205021 | 0.058309509 | 0.053854867 | 0.05963652  | 0.051236331 |
| ENSG00000108788 | 0.022055809 | 0.028835671 | 0.032542716 | 0.021835449 |
| ENSG00000161980 | 0.032034703 | 0.036772437 | 0.035715149 | 0.030352767 |
| ENSG00000151240 | 0.024109797 | 0.026914696 | 0.025563228 | 0.016084327 |
| ENSG00000108932 | 0.018461822 | 0.026230388 | 0.026786865 | 0.019596493 |
| ENSG00000173702 | 0.109167011 | 0.075060633 | 0.056854208 | 0.048356222 |
| ENSG00000185614 | 0.059176894 | 0.036451002 | 0.048424001 | 0.048134943 |
| ENSG00000135298 | 0.01743165  | 0.025446267 | 0.024797097 | 0.017478297 |
| ENSG00000155918 | 0.015693906 | 0.024724388 | 0.025520382 | 0.014664337 |
| ENSG00000189058 | 0.038257568 | 0.036810627 | 0.032720089 | 0.018932598 |
| ENSG00000167528 | 0.017524488 | 0.025748049 | 0.02495394  | 0.018463775 |
| ENSG00000187682 | 0.016431922 | 0.025815591 | 0.025305932 | 0.0163932   |
| ENSG00000197617 | 0.015170836 | 0.025368982 | 0.025326444 | 0.014555947 |
| ENSG00000204385 | 0.02596554  | 0.029930433 | 0.027889373 | 0.025466698 |
| ENSG00000203943 | 0.073533932 | 0.057385887 | 0.054714449 | 0.055379468 |
| ENSG00000171202 | 0.024153741 | 0.028001024 | 0.029372651 | 0.026113387 |
| ENSG00000171502 | 0.068000999 | 0.061133886 | 0.053055614 | 0.062755947 |
| ENSG00000151023 | 0.019922457 | 0.02739662  | 0.030490097 | 0.02061691  |
| ENSG00000166224 | 0.031487348 | 0.034477704 | 0.033705688 | 0.03302228  |
| ENSG00000141506 | 0.045094407 | 0.041338274 | 0.038192576 | 0.03858825  |
| ENSG00000143869 | 0.01577634  | 0.025547308 | 0.024707159 | 0.01581677  |
| ENSG00000133878 | 0.017584861 | 0.02547668  | 0.024560918 | 0.017215564 |
| ENSG00000171621 | 0.045720385 | 0.051271589 | 0.03788235  | 0.029170033 |
| ENSG00000167657 | 0.02616186  | 0.037886362 | 0.045930863 | 0.02632589  |
| ENSG00000084693 | 0.027091503 | 0.030648176 | 0.028183731 | 0.024616424 |
| ENSG00000163377 | 0.016592264 | 0.025025976 | 0.025107184 | 0.015794224 |
| ENSG00000159445 | 0.030855145 | 0.032466317 | 0.035343756 | 0.030561144 |
| ENSG00000162711 | 0.016670775 | 0.029328529 | 0.02527252  | 0.014899588 |
| ENSG00000135960 | 0.015323411 | 0.025010715 | 0.024558856 | 0.016150068 |
| ENSG00000198176 | 0.028926756 | 0.034241202 | 0.028606263 | 0.026454141 |
| ENSG00000183542 | 0.015970422 | 0.025126844 | 0.025351569 | 0.015598658 |
| ENSG00000147533 | 0.029064373 | 0.033243769 | 0.03164362  | 0.025536323 |
| ENSG00000164484 | 0.085957748 | 0.086538376 | 0.12970416  | 0.097227235 |
| ENSG00000107929 | 0.022924354 | 0.034148186 | 0.028481225 | 0.023793047 |
| ENSG00000105854 | 0.096869834 | 0.090615938 | 0.080789695 | 0.084514155 |
| ENSG00000100221 | 0.02914708  | 0.040715655 | 0.032418713 | 0.023400783 |
| ENSG00000171604 | 0.037345187 | 0.033843635 | 0.03178831  | 0.032173873 |
| ENSG00000156639 | 0.03043621  | 0.037908946 | 0.034493073 | 0.030785613 |
| ENSG00000132773 | 0.034973236 | 0.033932538 | 0.0517139   | 0.043875996 |
| ENSG00000147257 | 0.016967172 | 0.02646791  | 0.025000118 | 0.017502032 |
| ENSG00000174780 | 0.024802577 | 0.030659    | 0.031132184 | 0.026261868 |
| ENSG00000152268 | 0.016272    | 0.025292182 | 0.025785363 | 0.015936436 |
| ENSG00000175485 | 0.01630115  | 0.02551835  | 0.025666848 | 0.0158539   |
| ENSG00000117090 | 0.034640045 | 0.030356153 | 0.030707526 | 0.031144612 |
| ENSG00000159166 | 0.022510981 | 0.027222218 | 0.028200728 | 0.020142836 |
| ENSG00000095951 | 0.036177427 | 0.038048042 | 0.040084491 | 0.030804106 |
| ENSG00000198746 | 0.031652398 | 0.041630023 | 0.040651545 | 0.032681297 |
| ENSG00000127774 | 0.023030278 | 0.030700633 | 0.030554451 | 0.0253376   |
| ENSG00000100385 | 0.036484342 | 0.038269961 | 0.038746584 | 0.029531669 |
| ENSG00000182154 | 0.02758716  | 0.031170234 | 0.030080216 | 0.031455571 |
| ENSG00000070886 | 0.016219676 | 0.024811018 | 0.024437105 | 0.015851156 |

|                 |             |             |             |             |
|-----------------|-------------|-------------|-------------|-------------|
| ENSG00000101200 | 0.015716974 | 0.024447858 | 0.024440738 | 0.014870969 |
| ENSG00000186452 | 0.016496132 | 0.025267521 | 0.025650103 | 0.01461281  |
| ENSG00000171992 | 0.01722807  | 0.026603113 | 0.024978047 | 0.016509486 |
| ENSG00000184922 | 0.031840793 | 0.036570313 | 0.040154956 | 0.027077274 |
| ENSG00000103194 | 0.023128979 | 0.028933569 | 0.030750112 | 0.019838328 |
| ENSG00000164037 | 0.022537528 | 0.02735792  | 0.028928122 | 0.023325466 |
| ENSG00000043591 | 0.01774413  | 0.025095584 | 0.024721478 | 0.015805504 |
| ENSG00000167543 | 0.032375644 | 0.032256336 | 0.035745885 | 0.029657229 |
| ENSG00000144015 | 0.069787546 | 0.025334317 | 0.04791658  | 0.027843205 |
| ENSG00000163216 | 0.024992884 | 0.034125547 | 0.024751563 | 0.017284452 |
| ENSG00000185591 | 0.042293721 | 0.034019679 | 0.033049733 | 0.02640456  |
| ENSG00000100197 | 0.017776986 | 0.028938707 | 0.025629025 | 0.018127734 |
| ENSG00000176387 | 0.01564358  | 0.025227322 | 0.024956555 | 0.01541481  |
| ENSG00000037637 | 0.02602854  | 0.032159121 | 0.032063635 | 0.02557035  |
| ENSG00000167487 | 0.018992307 | 0.026874576 | 0.030387076 | 0.018986047 |
| ENSG00000161013 | 0.014980934 | 0.025152346 | 0.025341817 | 0.014712199 |
| ENSG00000148297 | 0.032591967 | 0.038442789 | 0.03362389  | 0.03035523  |
| ENSG00000132613 | 0.017729186 | 0.02546698  | 0.026267489 | 0.016065806 |
| ENSG00000135211 | 0.023302354 | 0.031839218 | 0.028802411 | 0.019511456 |
| ENSG00000149476 | 0.028602166 | 0.028047812 | 0.031186449 | 0.031565212 |
| ENSG00000110400 | 0.017326778 | 0.025479407 | 0.025883133 | 0.016857705 |
| ENSG00000169676 | 0.018777135 | 0.025696379 | 0.025295015 | 0.017115631 |
| ENSG00000180992 | 0.024884853 | 0.029813316 | 0.030409181 | 0.022718075 |
| ENSG00000140395 | 0.028620838 | 0.030822649 | 0.03031286  | 0.023828265 |
| ENSG00000138769 | 0.016829004 | 0.026381448 | 0.025745287 | 0.017605961 |
| ENSG00000182566 | 0.049297181 | 0.044339921 | 0.030879423 | 0.031076746 |
| ENSG00000178586 | 0.01607369  | 0.024837519 | 0.024455642 | 0.016083354 |
| ENSG00000119965 | 0.034432845 | 0.037836924 | 0.03973058  | 0.034667297 |
| ENSG00000183873 | 0.016146737 | 0.025247583 | 0.024620046 | 0.015147565 |
| ENSG00000184293 | 0.08423958  | 0.043838975 | 0.042283162 | 0.039962239 |
| ENSG00000033011 | 0.031978543 | 0.035556955 | 0.033177811 | 0.03743893  |
| ENSG00000136848 | 0.015349292 | 0.025301336 | 0.025166038 | 0.015626098 |
| ENSG00000124279 | 0.029430366 | 0.04343544  | 0.039861841 | 0.032854444 |
| ENSG00000113643 | 0.023053903 | 0.028689694 | 0.028456099 | 0.022245702 |
| ENSG00000167183 | 0.015948058 | 0.025107057 | 0.02544483  | 0.01790023  |
| ENSG00000110042 | 0.017634013 | 0.027251956 | 0.026218489 | 0.016677621 |
| ENSG00000197245 | 0.015793378 | 0.025795188 | 0.024573186 | 0.015628102 |
| ENSG00000135924 | 0.030738914 | 0.033211289 | 0.036719686 | 0.034030322 |
| ENSG00000141052 | 0.015448553 | 0.024860923 | 0.024985294 | 0.015410126 |
| ENSG00000213139 | 0.028566264 | 0.031164155 | 0.032272967 | 0.022805836 |
| ENSG00000055070 | 0.023391256 | 0.03126104  | 0.028376413 | 0.022792768 |
| ENSG00000151090 | 0.016545555 | 0.025984062 | 0.024865536 | 0.01544957  |
| ENSG00000132274 | 0.02437928  | 0.029638679 | 0.029188766 | 0.027107577 |
| ENSG00000016490 | 0.016084868 | 0.024861517 | 0.025275515 | 0.015626272 |
| ENSG00000132952 | 0.028782671 | 0.036393124 | 0.038433533 | 0.026788386 |
| ENSG00000112033 | 0.017035854 | 0.026925585 | 0.02663556  | 0.016323718 |
| ENSG00000085465 | 0.057294578 | 0.041196235 | 0.044747013 | 0.04810483  |
| ENSG00000165478 | 0.016708064 | 0.025936768 | 0.024971516 | 0.016335167 |
| ENSG00000165868 | 0.03341016  | 0.035574721 | 0.029345772 | 0.030787256 |
| ENSG00000078098 | 0.015434508 | 0.025975244 | 0.024731429 | 0.014993528 |
| ENSG00000137441 | 0.073923203 | 0.076071545 | 0.051351018 | 0.074545943 |
| ENSG00000069535 | 0.018588719 | 0.025406103 | 0.026141725 | 0.016527544 |
| ENSG00000143164 | 0.023724058 | 0.034591439 | 0.028988824 | 0.020499084 |
| ENSG00000150347 | 0.022556616 | 0.02875302  | 0.030058862 | 0.021227594 |

|                 |             |             |             |             |
|-----------------|-------------|-------------|-------------|-------------|
| ENSG00000110375 | 0.048138716 | 0.05147966  | 0.044807565 | 0.052869568 |
| ENSG00000074660 | 0.061058637 | 0.062424411 | 0.069075978 | 0.066872876 |
| ENSG00000174748 | 0.018833978 | 0.027944942 | 0.026413949 | 0.020175231 |
| ENSG00000113194 | 0.023226663 | 0.031348134 | 0.033818696 | 0.023448397 |
| ENSG00000169064 | 0.018766212 | 0.02679213  | 0.026824787 | 0.018427027 |
| ENSG00000172349 | 0.058037868 | 0.067583809 | 0.066973821 | 0.051576905 |
| ENSG00000196218 | 0.01832313  | 0.026266557 | 0.026770762 | 0.022979369 |
| ENSG00000108641 | 0.037766569 | 0.040067177 | 0.035253436 | 0.03806467  |
| ENSG00000240428 | 0.017012779 | 0.02445228  | 0.025543297 | 0.01614562  |
| ENSG00000204228 | 0.034946875 | 0.032070441 | 0.040080944 | 0.03465463  |
| ENSG00000177551 | 0.015057606 | 0.025695276 | 0.024594763 | 0.014451232 |
| ENSG00000135482 | 0.037781539 | 0.040142751 | 0.031284439 | 0.02933319  |
| ENSG00000179397 | 0.015187319 | 0.025390485 | 0.024757952 | 0.013803385 |
| ENSG00000144028 | 0.022676265 | 0.029041133 | 0.031548064 | 0.019475524 |
| ENSG00000121350 | 0.034990477 | 0.043566921 | 0.038105208 | 0.030963414 |
| ENSG00000131653 | 0.028363405 | 0.032394434 | 0.029037743 | 0.02660241  |
| ENSG00000125447 | 0.015968524 | 0.02550715  | 0.024764676 | 0.015587993 |
| ENSG00000158850 | 0.034540615 | 0.034984268 | 0.040339062 | 0.034491293 |
| ENSG00000242574 | 0.034414783 | 0.039270458 | 0.0407222   | 0.045795488 |
| ENSG00000153714 | 0.021912623 | 0.026201056 | 0.025155535 | 0.01490901  |
| ENSG00000176454 | 0.03988396  | 0.035687847 | 0.032487994 | 0.029837172 |
| ENSG00000172159 | 0.026180094 | 0.047010189 | 0.02986482  | 0.025812267 |
| ENSG00000163116 | 0.015797246 | 0.024695474 | 0.024087525 | 0.014869742 |
| ENSG00000107140 | 0.027649571 | 0.030575152 | 0.03078556  | 0.026899556 |
| ENSG00000244362 | 0.016221136 | 0.025077257 | 0.0257067   | 0.014895266 |
| ENSG00000149658 | 0.026686858 | 0.038539956 | 0.046642557 | 0.027169084 |
| ENSG00000123838 | 0.016194201 | 0.024973241 | 0.024797547 | 0.014952858 |
| ENSG00000073111 | 0.029025734 | 0.032773622 | 0.030628376 | 0.025673102 |
| ENSG00000054611 | 0.030831945 | 0.035397303 | 0.032294871 | 0.032851579 |
| ENSG00000164086 | 0.018608772 | 0.030460148 | 0.026879039 | 0.021921305 |
| ENSG00000104412 | 0.028346559 | 0.031871576 | 0.029924285 | 0.027370038 |
| ENSG00000064270 | 0.015135171 | 0.024388871 | 0.024942653 | 0.015206252 |
| ENSG00000177984 | 0.029817346 | 0.029344463 | 0.027674028 | 0.024607904 |
| ENSG00000163032 | 0.018267929 | 0.025288026 | 0.02676917  | 0.016450953 |
| ENSG00000168090 | 0.030132778 | 0.033941476 | 0.030047521 | 0.024037865 |
| ENSG00000111796 | 0.014960847 | 0.023663875 | 0.024797167 | 0.015900888 |
| ENSG00000055957 | 0.033758503 | 0.036670806 | 0.028425885 | 0.049079203 |
| ENSG00000197580 | 0.018521532 | 0.02708352  | 0.026203417 | 0.019520428 |
| ENSG00000163530 | 0.018556077 | 0.029225685 | 0.028000963 | 0.018080735 |
| ENSG00000106128 | 0.02284364  | 0.031412825 | 0.029989272 | 0.020762612 |
| ENSG00000139636 | 0.032648032 | 0.031465818 | 0.035499655 | 0.034822518 |
| ENSG00000133115 | 0.020857871 | 0.028490904 | 0.02805874  | 0.021410555 |
| ENSG00000183508 | 0.074070865 | 0.075036343 | 0.081289574 | 0.07608551  |
| ENSG00000175336 | 0.017673821 | 0.025433147 | 0.026418167 | 0.018320365 |
| ENSG00000103066 | 0.024797605 | 0.030689157 | 0.032816122 | 0.023334566 |
| ENSG00000163347 | 0.087592311 | 0.026683657 | 0.024984725 | 0.017662415 |
| ENSG00000164169 | 0.02934431  | 0.03360248  | 0.032632919 | 0.024967696 |
| ENSG00000070269 | 0.027719573 | 0.035723999 | 0.030360641 | 0.025278051 |
| ENSG00000104974 | 0.016001781 | 0.026435604 | 0.025957638 | 0.01660384  |
| ENSG00000145779 | 0.026860919 | 0.030078556 | 0.029630091 | 0.022858965 |
| ENSG00000197632 | 0.075838668 | 0.031634007 | 0.025003763 | 0.043097034 |
| ENSG00000120805 | 0.02427706  | 0.030890759 | 0.032895103 | 0.026614794 |
| ENSG00000176009 | 0.015982152 | 0.026253851 | 0.02508888  | 0.014866994 |
| ENSG00000135519 | 0.047119323 | 0.046484898 | 0.041917724 | 0.037991203 |

|                 |             |             |             |             |
|-----------------|-------------|-------------|-------------|-------------|
| ENSG00000178922 | 0.05618428  | 0.048453576 | 0.037849849 | 0.047788794 |
| ENSG00000049759 | 0.053156972 | 0.049322393 | 0.036410818 | 0.035320966 |
| ENSG00000185238 | 0.032888838 | 0.033217428 | 0.033365973 | 0.027204427 |
| ENSG00000003756 | 0.02068453  | 0.028256178 | 0.031175596 | 0.020064793 |
| ENSG00000149503 | 0.016593987 | 0.024656984 | 0.025651245 | 0.015100629 |
| ENSG00000179088 | 0.049208812 | 0.040697107 | 0.03703343  | 0.045470108 |
| ENSG00000170027 | 0.021185961 | 0.029505217 | 0.028818863 | 0.022465978 |
| ENSG00000137674 | 0.0495637   | 0.046885192 | 0.027848231 | 0.02814156  |
| ENSG00000131269 | 0.024898772 | 0.030510002 | 0.030864573 | 0.02345767  |
| ENSG00000115504 | 0.03581126  | 0.043175526 | 0.0396209   | 0.044041077 |
| ENSG00000156510 | 0.014228929 | 0.025295025 | 0.025063932 | 0.017196155 |
| ENSG00000176200 | 0.01609905  | 0.025409599 | 0.024160151 | 0.014941847 |
| ENSG00000102312 | 0.022251239 | 0.031329679 | 0.028263985 | 0.026419049 |
| ENSG00000149124 | 0.017914434 | 0.026883302 | 0.026187435 | 0.01621775  |
| ENSG00000188389 | 0.037919332 | 0.043087635 | 0.045805703 | 0.042020681 |
| ENSG00000069943 | 0.027511548 | 0.032958827 | 0.03177292  | 0.0219276   |
| ENSG00000124587 | 0.065570682 | 0.074958755 | 0.057552161 | 0.046866396 |
| ENSG00000070366 | 0.021027189 | 0.031182062 | 0.030325938 | 0.023994127 |
| ENSG00000162231 | 0.033230327 | 0.031894618 | 0.035656782 | 0.028730569 |
| ENSG00000164871 | 0.015037185 | 0.023885327 | 0.024382097 | 0.015211076 |
| ENSG00000133401 | 0.016012885 | 0.024982294 | 0.02605872  | 0.015759775 |
| ENSG00000110958 | 0.026553235 | 0.03169231  | 0.0273263   | 0.01985424  |
| ENSG00000185513 | 0.016233816 | 0.026802718 | 0.027162302 | 0.015462036 |
| ENSG00000138622 | 0.017275945 | 0.025641887 | 0.02515336  | 0.015366182 |
| ENSG00000118515 | 0.090329362 | 0.07727976  | 0.077278128 | 0.079152796 |
| ENSG00000117594 | 0.01577396  | 0.024943346 | 0.0248412   | 0.015390382 |
| ENSG00000188833 | 0.017198141 | 0.025574033 | 0.026535858 | 0.019356133 |
| ENSG00000144827 | 0.037587688 | 0.035418434 | 0.033799418 | 0.023078677 |
| ENSG00000131188 | 0.046839482 | 0.039309379 | 0.039857125 | 0.040822827 |
| ENSG00000066923 | 0.067098635 | 0.056529396 | 0.061708168 | 0.06846349  |
| ENSG00000114853 | 0.016198346 | 0.025185397 | 0.025882432 | 0.016898598 |
| ENSG00000185909 | 0.018142378 | 0.026702407 | 0.027154691 | 0.017474028 |
| ENSG00000129219 | 0.02329322  | 0.028333714 | 0.027701091 | 0.021658101 |
| ENSG00000179950 | 0.032849576 | 0.032036825 | 0.035587621 | 0.031060198 |
| ENSG00000102387 | 0.015443296 | 0.025675167 | 0.024375092 | 0.015466087 |
| ENSG00000081051 | 0.01701186  | 0.025753017 | 0.02456846  | 0.015657933 |
| ENSG00000101638 | 0.069967577 | 0.051200801 | 0.039193948 | 0.054616928 |
| ENSG00000187118 | 0.038289895 | 0.037546984 | 0.034954329 | 0.029044054 |
| ENSG00000106537 | 0.015892236 | 0.024775118 | 0.024932723 | 0.015672618 |
| ENSG00000109917 | 0.028364061 | 0.030773985 | 0.031459891 | 0.01965433  |
| ENSG00000015520 | 0.017368948 | 0.026623675 | 0.026211228 | 0.015105765 |
| ENSG00000124089 | 0.015284434 | 0.024507517 | 0.024635949 | 0.014375014 |
| ENSG00000162520 | 0.0155536   | 0.0254199   | 0.025815204 | 0.017839124 |
| ENSG00000102239 | 0.014011336 | 0.024734286 | 0.024894036 | 0.014166574 |
| ENSG00000162460 | 0.013194896 | 0.023800981 | 0.023812836 | 0.01375836  |
| ENSG00000242252 | 0.017752224 | 0.026635157 | 0.025503267 | 0.016068559 |
| ENSG00000197721 | 0.017119514 | 0.02734508  | 0.026012836 | 0.016986786 |
| ENSG00000187778 | 0.026474585 | 0.030292971 | 0.034672545 | 0.028529322 |
| ENSG00000167945 | 0.016016673 | 0.024325402 | 0.024885339 | 0.014511573 |
| ENSG00000164692 | 0.017733513 | 0.026689707 | 0.026503418 | 0.015596945 |
| ENSG00000101384 | 0.04850996  | 0.036241122 | 0.02708916  | 0.028955116 |
| ENSG00000100934 | 0.040153826 | 0.045823937 | 0.039485325 | 0.037966161 |
| ENSG00000178965 | 0.015478793 | 0.025321564 | 0.0251894   | 0.015491602 |
| ENSG00000131174 | 0.020448527 | 0.027254571 | 0.025601402 | 0.01861729  |



|                 |             |             |             |             |
|-----------------|-------------|-------------|-------------|-------------|
| ENSG00000173926 | 0.055584577 | 0.060243941 | 0.047838748 | 0.053511297 |
| ENSG00000198130 | 0.038493575 | 0.038974325 | 0.03413477  | 0.032121184 |
| ENSG00000197430 | 0.015010758 | 0.024233524 | 0.025320168 | 0.015779596 |
| ENSG00000117115 | 0.019050097 | 0.024939403 | 0.025148778 | 0.020269255 |
| ENSG00000125356 | 0.017674625 | 0.026334698 | 0.026714192 | 0.018131693 |
| ENSG00000142449 | 0.015692827 | 0.025501139 | 0.025260134 | 0.015262858 |
| ENSG00000197683 | 0.016058085 | 0.024753859 | 0.023757191 | 0.014845753 |
| ENSG00000140374 | 0.02045299  | 0.029015552 | 0.028364588 | 0.019045907 |
| ENSG00000079112 | 0.1264057   | 0.030419532 | 0.055668118 | 0.087723575 |
| ENSG00000145826 | 0.017380298 | 0.025411622 | 0.024712739 | 0.01613881  |
| ENSG00000187024 | 0.032582485 | 0.031171584 | 0.031071984 | 0.027112749 |
| ENSG00000172409 | 0.027241553 | 0.032513898 | 0.039635099 | 0.025948913 |
| ENSG00000181195 | 0.017018331 | 0.026015719 | 0.025155597 | 0.017756377 |
| ENSG00000156222 | 0.019416313 | 0.02582542  | 0.025831017 | 0.017117915 |
| ENSG00000122033 | 0.027313103 | 0.029857271 | 0.031168781 | 0.029589005 |
| ENSG00000100852 | 0.014959735 | 0.025459035 | 0.025090893 | 0.017501158 |
| ENSG00000064201 | 0.017399115 | 0.025733728 | 0.0253254   | 0.016404949 |
| ENSG00000145041 | 0.032046517 | 0.034991082 | 0.030280185 | 0.025537989 |
| ENSG00000149548 | 0.029844669 | 0.033171297 | 0.03267556  | 0.026807176 |
| ENSG00000119812 | 0.026267103 | 0.030121137 | 0.027064856 | 0.024546178 |
| ENSG00000104852 | 0.023803178 | 0.02860174  | 0.032060979 | 0.024293694 |
| ENSG00000143797 | 0.106331135 | 0.078070253 | 0.058545992 | 0.099117785 |
| ENSG00000078237 | 0.030914519 | 0.034467595 | 0.03539368  | 0.039710079 |
| ENSG00000196437 | 0.022367385 | 0.029150107 | 0.027621405 | 0.018237369 |
| ENSG00000183011 | 0.03235149  | 0.030785603 | 0.029688004 | 0.02680457  |
| ENSG00000130775 | 0.050116262 | 0.046156594 | 0.049490432 | 0.046754552 |
| ENSG00000173166 | 0.015476682 | 0.025522567 | 0.024332937 | 0.014785066 |
| ENSG00000158156 | 0.030348394 | 0.043345224 | 0.043207919 | 0.027254308 |
| ENSG00000163435 | 0.038298181 | 0.033879235 | 0.03258544  | 0.028964279 |
| ENSG00000119203 | 0.030233405 | 0.034955221 | 0.031133152 | 0.024053533 |
| ENSG00000170788 | 0.016842729 | 0.02523146  | 0.025595728 | 0.014874026 |
| ENSG00000006757 | 0.039551724 | 0.040420098 | 0.035820373 | 0.029133801 |
| ENSG00000162736 | 0.022226816 | 0.029250364 | 0.032739471 | 0.024705177 |
| ENSG00000108861 | 0.047619663 | 0.038039435 | 0.037699526 | 0.038158818 |
| ENSG00000126883 | 0.021605662 | 0.031221093 | 0.034811218 | 0.025219872 |
| ENSG00000186298 | 0.021980946 | 0.028705277 | 0.026446316 | 0.019375862 |
| ENSG00000167208 | 0.026571429 | 0.031690146 | 0.028625033 | 0.02547476  |
| ENSG00000143384 | 0.046608221 | 0.057746913 | 0.052968291 | 0.0473077   |
| ENSG00000151150 | 0.015515371 | 0.024221312 | 0.023914343 | 0.014718779 |
| ENSG00000116473 | 0.026631626 | 0.03161809  | 0.029129613 | 0.023192284 |
| ENSG00000125498 | 0.016565112 | 0.025773555 | 0.025501135 | 0.016423383 |
| ENSG00000133574 | 0.137567689 | 0.123360136 | 0.114054556 | 0.136320332 |
| ENSG00000068120 | 0.025893585 | 0.029141209 | 0.030211271 | 0.018811987 |
| ENSG00000083454 | 0.017562317 | 0.026780327 | 0.02436757  | 0.016447922 |
| ENSG00000151376 | 0.035710055 | 0.039262196 | 0.02660892  | 0.02815261  |
| ENSG00000180353 | 0.024417611 | 0.028554246 | 0.028867609 | 0.026939464 |
| ENSG00000197459 | 0.054669369 | 0.057109328 | 0.048628755 | 0.050534006 |
| ENSG00000088179 | 0.033141722 | 0.037450033 | 0.034580644 | 0.030647582 |
| ENSG00000168214 | 0.035806126 | 0.033113176 | 0.036201735 | 0.032864007 |
| ENSG00000005469 | 0.046824865 | 0.043936216 | 0.035300704 | 0.030737927 |
| ENSG00000173418 | 0.026208357 | 0.031159715 | 0.029393425 | 0.021229579 |
| ENSG00000167740 | 0.038865877 | 0.036578721 | 0.032591621 | 0.03301577  |
| ENSG00000139318 | 0.052972499 | 0.041476593 | 0.047919222 | 0.052342001 |
| ENSG00000161642 | 0.031152001 | 0.033281692 | 0.027692341 | 0.032074976 |

|                 |             |             |             |             |
|-----------------|-------------|-------------|-------------|-------------|
| ENSG00000163630 | 0.016302799 | 0.025532123 | 0.025587095 | 0.014502153 |
| ENSG00000156011 | 0.054528132 | 0.032395865 | 0.028757204 | 0.028750753 |
| ENSG00000112149 | 0.063468914 | 0.064906345 | 0.059573657 | 0.061320169 |
| ENSG00000174521 | 0.015199375 | 0.025510095 | 0.024112357 | 0.014717092 |
| ENSG00000007047 | 0.017256784 | 0.026016266 | 0.025974131 | 0.016049487 |
| ENSG00000145715 | 0.017802681 | 0.025476579 | 0.027258718 | 0.016859097 |
| ENSG00000182919 | 0.030491274 | 0.039528583 | 0.033788865 | 0.030593116 |
| ENSG00000165733 | 0.024674453 | 0.035241396 | 0.028266246 | 0.024649456 |
| ENSG00000180596 | 0.056594044 | 0.056074806 | 0.04929082  | 0.04469135  |
| ENSG00000176406 | 0.098002161 | 0.036906079 | 0.031391491 | 0.051004184 |
| ENSG00000151689 | 0.031634266 | 0.037202239 | 0.032118002 | 0.029911741 |
| ENSG00000124818 | 0.015833241 | 0.024766944 | 0.025243335 | 0.015584385 |
| ENSG00000154358 | 0.015219655 | 0.025147083 | 0.025070006 | 0.016143877 |
| ENSG00000130147 | 0.017211033 | 0.025561452 | 0.025247476 | 0.01549557  |
| ENSG00000031003 | 0.034390532 | 0.039555496 | 0.039071121 | 0.032186461 |
| ENSG00000121579 | 0.041151352 | 0.0421048   | 0.035679244 | 0.030457543 |
| ENSG00000157870 | 0.06167558  | 0.048312968 | 0.041384467 | 0.051037767 |
| ENSG00000128342 | 0.023772101 | 0.030684965 | 0.027551    | 0.024090181 |
| ENSG00000081791 | 0.027831557 | 0.03145417  | 0.0283789   | 0.020427714 |
| ENSG00000150779 | 0.023770255 | 0.030354974 | 0.028782751 | 0.025302834 |
| ENSG00000181718 | 0.015450977 | 0.02428278  | 0.024841827 | 0.014988104 |
| ENSG00000175063 | 0.045562695 | 0.035763877 | 0.038840905 | 0.035104216 |
| ENSG00000100209 | 0.023430933 | 0.028567459 | 0.028854775 | 0.021286511 |
| ENSG00000080031 | 0.017508651 | 0.025642969 | 0.024976917 | 0.017530199 |
| ENSG00000155506 | 0.024664038 | 0.030347712 | 0.035167835 | 0.025274979 |
| ENSG00000090612 | 0.03121414  | 0.033141567 | 0.033530691 | 0.02455925  |
| ENSG00000107295 | 0.017469701 | 0.024755876 | 0.025073973 | 0.019461655 |
| ENSG00000221968 | 0.042570657 | 0.041201375 | 0.034430335 | 0.036640302 |
| ENSG00000107863 | 0.043882845 | 0.03629518  | 0.037890921 | 0.031761414 |
| ENSG00000130055 | 0.015765947 | 0.024200865 | 0.024511313 | 0.015227936 |
| ENSG00000111846 | 0.015026017 | 0.02412091  | 0.024886743 | 0.014320888 |
| ENSG00000131055 | 0.024197137 | 0.028063823 | 0.029746633 | 0.01949553  |
| ENSG00000036530 | 0.018603497 | 0.025994888 | 0.028588654 | 0.018104688 |
| ENSG00000102753 | 0.026433595 | 0.032123523 | 0.029553458 | 0.030713958 |
| ENSG00000087448 | 0.042231717 | 0.041028396 | 0.034806592 | 0.03037176  |
| ENSG00000121774 | 0.020284185 | 0.026946519 | 0.02653511  | 0.020544237 |
| ENSG00000166897 | 0.017329157 | 0.024894123 | 0.023935094 | 0.015616696 |
| ENSG00000067606 | 0.045206556 | 0.045376489 | 0.043400772 | 0.047652301 |
| ENSG00000106246 | 0.025340788 | 0.031104273 | 0.035389847 | 0.025811992 |
| ENSG00000151882 | 0.078309354 | 0.050718478 | 0.056990779 | 0.063920249 |
| ENSG00000099625 | 0.018442099 | 0.025155173 | 0.027388916 | 0.015977533 |
| ENSG00000163421 | 0.018544807 | 0.027306521 | 0.024950421 | 0.017303469 |
| ENSG00000165084 | 0.019644359 | 0.025562877 | 0.027061442 | 0.016952296 |
| ENSG00000091483 | 0.036389364 | 0.045533189 | 0.034222799 | 0.041696632 |
| ENSG00000205667 | 0.015569719 | 0.024717379 | 0.025158879 | 0.015201955 |
| ENSG00000149043 | 0.015264331 | 0.024577269 | 0.024371025 | 0.015489503 |
| ENSG00000129451 | 0.016366457 | 0.024150735 | 0.024770298 | 0.01528394  |
| ENSG00000043143 | 0.024215266 | 0.029839351 | 0.028937805 | 0.022482016 |
| ENSG00000196932 | 0.015904193 | 0.025526974 | 0.025244266 | 0.014926735 |
| ENSG00000002330 | 0.019747455 | 0.029211839 | 0.026654994 | 0.021760804 |
| ENSG00000185271 | 0.017910666 | 0.025286203 | 0.025372894 | 0.015925398 |
| ENSG00000172403 | 0.016845941 | 0.02526176  | 0.025218943 | 0.015028401 |
| ENSG00000177352 | 0.028470331 | 0.03305186  | 0.038839872 | 0.034308718 |
| ENSG00000188120 | 0.014765525 | 0.024887748 | 0.024444002 | 0.015869401 |

|                 |             |             |             |             |
|-----------------|-------------|-------------|-------------|-------------|
| ENSG0000008311  | 0.036933442 | 0.032563899 | 0.032376762 | 0.02782391  |
| ENSG00000106648 | 0.024205024 | 0.02689661  | 0.02759129  | 0.022740428 |
| ENSG00000249481 | 0.021254089 | 0.024691112 | 0.024834179 | 0.016082166 |
| ENSG00000135537 | 0.036350789 | 0.036346048 | 0.030073801 | 0.022358081 |
| ENSG00000137337 | 0.025236983 | 0.030699792 | 0.032035046 | 0.02199299  |
| ENSG00000182544 | 0.028527129 | 0.033473538 | 0.043252854 | 0.028901104 |
| ENSG00000021826 | 0.041240528 | 0.042001148 | 0.031848161 | 0.032876375 |
| ENSG00000150787 | 0.038734809 | 0.033734557 | 0.032227641 | 0.032619247 |
| ENSG00000181523 | 0.031860654 | 0.04565957  | 0.050765203 | 0.034584417 |
| ENSG00000099715 | 0.020990732 | 0.031199314 | 0.027203472 | 0.021723882 |
| ENSG00000132694 | 0.015529551 | 0.025489806 | 0.0251276   | 0.01519767  |
| ENSG00000174891 | 0.040621967 | 0.041235364 | 0.034091735 | 0.031588185 |
| ENSG00000167851 | 0.04548745  | 0.039329519 | 0.044070284 | 0.042718699 |
| ENSG00000111877 | 0.033924606 | 0.035138845 | 0.031151595 | 0.027471409 |
| ENSG00000131068 | 0.016948048 | 0.025407552 | 0.025030176 | 0.016516884 |
| ENSG00000181744 | 0.036567548 | 0.042365542 | 0.036067966 | 0.033365462 |
| ENSG00000198625 | 0.045470707 | 0.05663974  | 0.043474396 | 0.035122581 |
| ENSG00000120278 | 0.054756525 | 0.038330727 | 0.031400528 | 0.043900698 |
| ENSG00000133706 | 0.036514322 | 0.037189965 | 0.029073914 | 0.023718018 |
| ENSG00000162775 | 0.036598577 | 0.041053031 | 0.047437118 | 0.031127374 |
| ENSG00000143387 | 0.036625884 | 0.0324381   | 0.038059447 | 0.027119967 |
| ENSG00000176076 | 0.019862417 | 0.027114637 | 0.028963079 | 0.016936882 |
| ENSG00000002822 | 0.051422985 | 0.035264966 | 0.04127232  | 0.043561628 |
| ENSG00000013288 | 0.015291638 | 0.025347326 | 0.024933029 | 0.014433399 |
| ENSG00000185339 | 0.080674524 | 0.073506738 | 0.063290069 | 0.070689284 |
| ENSG00000176125 | 0.019374109 | 0.024765518 | 0.026204081 | 0.015987059 |
| ENSG00000123131 | 0.040252615 | 0.035319    | 0.036904979 | 0.031557133 |
| ENSG00000162434 | 0.053780448 | 0.07318848  | 0.043773672 | 0.062052031 |
| ENSG00000166927 | 0.078782643 | 0.061840616 | 0.058131413 | 0.067500745 |
| ENSG00000143355 | 0.014852471 | 0.024760284 | 0.025113265 | 0.016340311 |
| ENSG00000125810 | 0.134278832 | 0.059661052 | 0.045062867 | 0.096748191 |
| ENSG00000110090 | 0.01902116  | 0.026509311 | 0.026109084 | 0.0178682   |
| ENSG00000130382 | 0.017112746 | 0.027986814 | 0.027438622 | 0.02500257  |
| ENSG00000224586 | 0.015291118 | 0.024670626 | 0.024713626 | 0.014894776 |
| ENSG00000006530 | 0.025868497 | 0.031927917 | 0.03135486  | 0.025758117 |
| ENSG00000173372 | 0.017739665 | 0.0253481   | 0.028207159 | 0.016182452 |
| ENSG00000182054 | 0.034513295 | 0.034556319 | 0.029911141 | 0.030824181 |
| ENSG00000120498 | 0.015487397 | 0.02516745  | 0.024660372 | 0.01611153  |
| ENSG00000172731 | 0.016303696 | 0.025503521 | 0.024428522 | 0.015324987 |
| ENSG00000125520 | 0.04138628  | 0.035781652 | 0.032803083 | 0.033698372 |
| ENSG00000056487 | 0.020136598 | 0.027775603 | 0.027266484 | 0.021002644 |
| ENSG00000009830 | 0.020641894 | 0.028146331 | 0.029103292 | 0.018669488 |
| ENSG00000174371 | 0.040994288 | 0.03880308  | 0.033846529 | 0.033393036 |
| ENSG00000100626 | 0.015819683 | 0.026476667 | 0.025036338 | 0.015667704 |
| ENSG00000157168 | 0.015435249 | 0.026057453 | 0.025263494 | 0.015498159 |
| ENSG00000180318 | 0.015135605 | 0.024935497 | 0.025256577 | 0.01490713  |
| ENSG00000176746 | 0.014491357 | 0.02484534  | 0.025812196 | 0.014796126 |
| ENSG00000137996 | 0.030676884 | 0.033650712 | 0.029578742 | 0.022461652 |
| ENSG00000118965 | 0.027911274 | 0.035456256 | 0.031862571 | 0.022706276 |
| ENSG00000102103 | 0.021983285 | 0.027218382 | 0.027961945 | 0.021218414 |
| ENSG00000137574 | 0.02025229  | 0.02887169  | 0.029295951 | 0.023837752 |
| ENSG00000180776 | 0.043687923 | 0.063324317 | 0.047999522 | 0.054696893 |
| ENSG00000181867 | 0.014854056 | 0.024487901 | 0.024731403 | 0.014424192 |
| ENSG00000117748 | 0.024408437 | 0.028919389 | 0.031404434 | 0.020066905 |

|                 |             |             |             |             |
|-----------------|-------------|-------------|-------------|-------------|
| ENSG00000171227 | 0.020714169 | 0.031897425 | 0.028616298 | 0.026033659 |
| ENSG00000164620 | 0.038574577 | 0.037699706 | 0.035957381 | 0.035943335 |
| ENSG00000152380 | 0.016296926 | 0.025298627 | 0.024445129 | 0.016339231 |
| ENSG0000008838  | 0.0243633   | 0.031208292 | 0.030918469 | 0.021976754 |
| ENSG00000163464 | 0.015438906 | 0.0264113   | 0.024195508 | 0.015657637 |
| ENSG00000163933 | 0.019364701 | 0.025901062 | 0.026134906 | 0.016886642 |
| ENSG00000204592 | 0.030356175 | 0.032236251 | 0.03235679  | 0.024991042 |
| ENSG0000081320  | 0.043471136 | 0.052520184 | 0.04586868  | 0.048409345 |
| ENSG00000160862 | 0.01925144  | 0.027194183 | 0.026543359 | 0.01737697  |
| ENSG0000006042  | 0.047451733 | 0.031340179 | 0.034783211 | 0.040985645 |
| ENSG00000244734 | 0.017257171 | 0.024827644 | 0.025089243 | 0.015356075 |
| ENSG00000136273 | 0.017440319 | 0.025819994 | 0.025291069 | 0.015954127 |
| ENSG00000079739 | 0.03220638  | 0.032504319 | 0.030828837 | 0.023909338 |
| ENSG00000110104 | 0.039443639 | 0.042631772 | 0.040756194 | 0.04006722  |
| ENSG00000134339 | 0.039000896 | 0.047566917 | 0.048054538 | 0.050170065 |
| ENSG00000168959 | 0.016942236 | 0.025487964 | 0.025596579 | 0.015954043 |
| ENSG00000118518 | 0.030536856 | 0.039788404 | 0.03628725  | 0.029167129 |
| ENSG00000075188 | 0.03464445  | 0.032713165 | 0.031003142 | 0.02443914  |
| ENSG00000159625 | 0.016266993 | 0.026609601 | 0.02502415  | 0.016931982 |
| ENSG00000185033 | 0.015006957 | 0.024701841 | 0.024424568 | 0.014692202 |
| ENSG00000128228 | 0.048004537 | 0.044883618 | 0.044890818 | 0.051846344 |
| ENSG00000134627 | 0.036543923 | 0.041099671 | 0.033118887 | 0.042337165 |
| ENSG0000008018  | 0.021447215 | 0.027010312 | 0.027040603 | 0.017008028 |
| ENSG00000130402 | 0.024219928 | 0.02878239  | 0.02848394  | 0.022765692 |
| ENSG00000119900 | 0.045082596 | 0.036809349 | 0.036554468 | 0.030673209 |
| ENSG00000111540 | 0.030874596 | 0.031538077 | 0.031295371 | 0.032875811 |
| ENSG00000172915 | 0.068748835 | 0.045013673 | 0.042285748 | 0.049555527 |
| ENSG00000198542 | 0.026765676 | 0.027031474 | 0.025462185 | 0.015801431 |
| ENSG00000185043 | 0.038005159 | 0.032718841 | 0.033324257 | 0.032565422 |
| ENSG00000157978 | 0.034133802 | 0.030971165 | 0.033270159 | 0.032865965 |
| ENSG00000147133 | 0.026275979 | 0.031333177 | 0.029774885 | 0.027391651 |
| ENSG00000134463 | 0.053635983 | 0.04996047  | 0.052696743 | 0.058030509 |
| ENSG00000174483 | 0.029678515 | 0.03567196  | 0.028361216 | 0.028569617 |
| ENSG00000139192 | 0.047262172 | 0.043500805 | 0.049819586 | 0.039807626 |
| ENSG00000129951 | 0.015706006 | 0.025610021 | 0.025600554 | 0.014666217 |
| ENSG00000136710 | 0.024516814 | 0.034466665 | 0.032187668 | 0.023009845 |
| ENSG00000167641 | 0.017903564 | 0.026544301 | 0.02599902  | 0.019718203 |
| ENSG00000167646 | 0.018211962 | 0.026631959 | 0.025423245 | 0.020403273 |
| ENSG00000134028 | 0.045488088 | 0.059826032 | 0.026726205 | 0.038948161 |
| ENSG00000033050 | 0.032581786 | 0.039957275 | 0.033305515 | 0.035095355 |
| ENSG00000168070 | 0.016318733 | 0.02659444  | 0.025751181 | 0.018093458 |
| ENSG00000171540 | 0.110149831 | 0.057956126 | 0.037498389 | 0.043351302 |
| ENSG00000099991 | 0.028845392 | 0.035573805 | 0.031871401 | 0.02734725  |
| ENSG00000114850 | 0.042757873 | 0.041550176 | 0.037378397 | 0.039263316 |
| ENSG00000111275 | 0.080710717 | 0.057571894 | 0.055496343 | 0.057391907 |
| ENSG00000164270 | 0.014711614 | 0.024983874 | 0.025843834 | 0.015012358 |
| ENSG00000183751 | 0.031158955 | 0.034436107 | 0.028704077 | 0.028756141 |
| ENSG00000140006 | 0.024002378 | 0.029892339 | 0.030377282 | 0.019540486 |
| ENSG00000165837 | 0.01551119  | 0.025031577 | 0.025546151 | 0.015662278 |
| ENSG00000163956 | 0.026777625 | 0.032999806 | 0.036672842 | 0.029821184 |
| ENSG00000182334 | 0.01778126  | 0.024845848 | 0.027136321 | 0.017662244 |
| ENSG00000101321 | 0.017504181 | 0.027340361 | 0.025791936 | 0.018097837 |
| ENSG00000153789 | 0.020575307 | 0.025723105 | 0.028596806 | 0.015721864 |
| ENSG00000089048 | 0.031559598 | 0.033202494 | 0.03482595  | 0.029295028 |

|                 |             |             |             |             |
|-----------------|-------------|-------------|-------------|-------------|
| ENSG00000140995 | 0.049214583 | 0.047254817 | 0.046357717 | 0.042835181 |
| ENSG00000112062 | 0.019808107 | 0.028969393 | 0.027430768 | 0.016576149 |
| ENSG00000167515 | 0.027994318 | 0.031218084 | 0.033352926 | 0.027008955 |
| ENSG00000129636 | 0.045797858 | 0.04682217  | 0.038911601 | 0.069355994 |
| ENSG00000002726 | 0.047108817 | 0.024881095 | 0.02552917  | 0.041108249 |
| ENSG00000196072 | 0.046335614 | 0.032516721 | 0.042210639 | 0.082211096 |
| ENSG00000113240 | 0.030431351 | 0.035063026 | 0.037553538 | 0.032912505 |
| ENSG00000123374 | 0.03219074  | 0.037709599 | 0.031645076 | 0.028300182 |
| ENSG00000174827 | 0.025133025 | 0.026981811 | 0.028715786 | 0.020971002 |
| ENSG00000198034 | 0.01827803  | 0.026407125 | 0.02656396  | 0.018014678 |
| ENSG00000197914 | 0.032967052 | 0.03203287  | 0.035467232 | 0.033866235 |
| ENSG00000101911 | 0.030340273 | 0.034390072 | 0.031056839 | 0.024990638 |
| ENSG00000105929 | 0.015371525 | 0.02514034  | 0.02454021  | 0.015549069 |
| ENSG00000179632 | 0.023274083 | 0.027028496 | 0.039043199 | 0.028905429 |
| ENSG00000037897 | 0.036023854 | 0.0335428   | 0.034231254 | 0.035052281 |
| ENSG00000120322 | 0.015644998 | 0.024875285 | 0.02522749  | 0.01606837  |
| ENSG00000162545 | 0.093892943 | 0.065242709 | 0.057316186 | 0.062389168 |
| ENSG00000167604 | 0.018891654 | 0.02551667  | 0.025619833 | 0.016864339 |
| ENSG00000149654 | 0.016118503 | 0.025881649 | 0.026037567 | 0.015179352 |
| ENSG00000182667 | 0.015168444 | 0.02544225  | 0.025908727 | 0.015658848 |
| ENSG00000105723 | 0.016222006 | 0.024695765 | 0.02491559  | 0.015652632 |
| ENSG00000164749 | 0.022957342 | 0.026898632 | 0.024927825 | 0.026554068 |
| ENSG00000165462 | 0.014761346 | 0.024924684 | 0.024279885 | 0.014831553 |
| ENSG00000111450 | 0.03911067  | 0.035800319 | 0.037279134 | 0.0372683   |
| ENSG00000131788 | 0.025444196 | 0.032669777 | 0.035079601 | 0.034715092 |
| ENSG00000123610 | 0.092527702 | 0.08437447  | 0.081629183 | 0.084277376 |
| ENSG00000042781 | 0.01630496  | 0.025874931 | 0.025229142 | 0.015114386 |
| ENSG00000189227 | 0.027949852 | 0.030880281 | 0.031875599 | 0.02593835  |
| ENSG00000154654 | 0.041156075 | 0.041422858 | 0.055850298 | 0.036991732 |
| ENSG00000149599 | 0.016511869 | 0.025765172 | 0.024763371 | 0.014862368 |
| ENSG00000122203 | 0.026026465 | 0.032926233 | 0.03323951  | 0.025477043 |
| ENSG00000182621 | 0.046430315 | 0.026489834 | 0.024432457 | 0.026088973 |
| ENSG00000166575 | 0.036667847 | 0.035040557 | 0.030639996 | 0.029030479 |
| ENSG00000132330 | 0.051103332 | 0.049117555 | 0.050751557 | 0.051864033 |
| ENSG00000146416 | 0.047946738 | 0.049256083 | 0.042973832 | 0.04188561  |
| ENSG00000196636 | 0.037029039 | 0.037983762 | 0.036752042 | 0.03417161  |
| ENSG00000113916 | 0.015221378 | 0.024567101 | 0.025743539 | 0.015665699 |
| ENSG00000166313 | 0.019592667 | 0.028314698 | 0.029229858 | 0.019950859 |
| ENSG00000165215 | 0.015941947 | 0.025552304 | 0.024850844 | 0.016392132 |
| ENSG00000169118 | 0.015905561 | 0.024975322 | 0.026024115 | 0.015011418 |
| ENSG00000128652 | 0.0196101   | 0.027798649 | 0.030288886 | 0.017703149 |
| ENSG00000184599 | 0.015168237 | 0.025480328 | 0.024464096 | 0.01559306  |
| ENSG00000129214 | 0.015343832 | 0.025013644 | 0.024340042 | 0.015797101 |
| ENSG00000135404 | 0.031746667 | 0.034207393 | 0.033460815 | 0.027407206 |
| ENSG00000142319 | 0.018130637 | 0.025817948 | 0.02477975  | 0.01612307  |
| ENSG00000120063 | 0.030374069 | 0.035020065 | 0.033169224 | 0.030241907 |
| ENSG00000069248 | 0.03114023  | 0.034567253 | 0.029464615 | 0.02681684  |
| ENSG00000156599 | 0.031963204 | 0.039362989 | 0.040382104 | 0.029256587 |
| ENSG00000182551 | 0.039180465 | 0.039581966 | 0.037547489 | 0.033617243 |
| ENSG00000125166 | 0.026524229 | 0.033182928 | 0.031638805 | 0.029049238 |
| ENSG00000118971 | 0.022249967 | 0.028563055 | 0.0266324   | 0.022173432 |
| ENSG00000186889 | 0.034576783 | 0.032898798 | 0.034423241 | 0.031978676 |
| ENSG00000105559 | 0.049578904 | 0.060396101 | 0.048578291 | 0.058302197 |
| ENSG00000139914 | 0.016731342 | 0.0253551   | 0.024747804 | 0.017380166 |

|                |             |             |             |             |
|----------------|-------------|-------------|-------------|-------------|
| ENSG0000023516 | 0.035015115 | 0.04267308  | 0.03367696  | 0.030475538 |
| ENSG0000075785 | 0.024382589 | 0.031260157 | 0.031289518 | 0.022709158 |
| ENSG0000137802 | 0.024557764 | 0.040917441 | 0.0314007   | 0.031173458 |
| ENSG0000168301 | 0.031022027 | 0.032285244 | 0.033548104 | 0.023622154 |
| ENSG0000183304 | 0.015018885 | 0.025166372 | 0.024090249 | 0.014470666 |
| ENSG0000162571 | 0.01732529  | 0.024560061 | 0.024925307 | 0.015708592 |
| ENSG0000144191 | 0.016684683 | 0.027746889 | 0.025389472 | 0.017554209 |
| ENSG0000111203 | 0.03234199  | 0.035426047 | 0.034991448 | 0.028873657 |
| ENSG0000023892 | 0.034287853 | 0.033266153 | 0.03223394  | 0.023455225 |
| ENSG0000153233 | 0.018311326 | 0.026258411 | 0.026834095 | 0.017260163 |
| ENSG0000158163 | 0.015036861 | 0.024852341 | 0.024623914 | 0.014718211 |
| ENSG0000104047 | 0.0360742   | 0.040353428 | 0.032332931 | 0.028613849 |
| ENSG0000081087 | 0.034433317 | 0.039938429 | 0.033987287 | 0.030622251 |
| ENSG0000179639 | 0.036150086 | 0.024670499 | 0.025603043 | 0.022084378 |
| ENSG0000123612 | 0.021252784 | 0.030400547 | 0.025133861 | 0.019446454 |
| ENSG0000101363 | 0.026253855 | 0.027667155 | 0.029200176 | 0.020770528 |
| ENSG0000166886 | 0.025273963 | 0.032914363 | 0.035014174 | 0.031522883 |
| ENSG0000130706 | 0.024151911 | 0.02885899  | 0.035910054 | 0.030533749 |
| ENSG0000247746 | 0.019038466 | 0.02918837  | 0.028197399 | 0.017748119 |
| ENSG0000143126 | 0.018198237 | 0.024683004 | 0.025460936 | 0.018192966 |
| ENSG0000101350 | 0.036712581 | 0.035722344 | 0.039589491 | 0.032352702 |
| ENSG0000162949 | 0.016048954 | 0.024978446 | 0.025859896 | 0.015184995 |
| ENSG0000145908 | 0.133473946 | 0.074664818 | 0.081325293 | 0.076080964 |
| ENSG0000248541 | 0.075821926 | 0.051992526 | 0.072717156 | 0.073446576 |
| ENSG0000185115 | 0.041689755 | 0.040708222 | 0.041041117 | 0.037897804 |
| ENSG0000141560 | 0.032776303 | 0.03692007  | 0.037119636 | 0.030986464 |
| ENSG0000173431 | 0.016971714 | 0.02644387  | 0.025470419 | 0.017059092 |
| ENSG0000175166 | 0.031677295 | 0.038982688 | 0.033586533 | 0.031534675 |
| ENSG0000186723 | 0.018228219 | 0.025488667 | 0.025348489 | 0.014629677 |
| ENSG0000170382 | 0.017326081 | 0.025745437 | 0.024619769 | 0.015772006 |
| ENSG0000145901 | 0.023198907 | 0.029506428 | 0.029190374 | 0.021160024 |
| ENSG0000116871 | 0.020774219 | 0.031889568 | 0.035648268 | 0.023862432 |
| ENSG0000149196 | 0.025291568 | 0.029314203 | 0.029556626 | 0.019921264 |
| ENSG0000143067 | 0.013700971 | 0.024186052 | 0.02413549  | 0.0138548   |
| ENSG0000065457 | 0.024935223 | 0.030852983 | 0.030349126 | 0.02244968  |
| ENSG0000106459 | 0.026039515 | 0.029476624 | 0.029344602 | 0.019680945 |
| ENSG0000170955 | 0.075256305 | 0.047536523 | 0.047935236 | 0.05106536  |
| ENSG0000187676 | 0.059967678 | 0.04432417  | 0.042606441 | 0.041861843 |
| ENSG0000167767 | 0.017913785 | 0.02880603  | 0.024948429 | 0.02595196  |
| ENSG0000111196 | 0.037429086 | 0.035018363 | 0.03762798  | 0.038247724 |
| ENSG0000187123 | 0.015080817 | 0.024575591 | 0.025117695 | 0.014667252 |
| ENSG0000135046 | 0.114979351 | 0.109896464 | 0.10333301  | 0.119110673 |
| ENSG0000168237 | 0.028871544 | 0.029621509 | 0.02886997  | 0.025493973 |
| ENSG0000025708 | 0.041350111 | 0.041204428 | 0.038089962 | 0.034700535 |
| ENSG0000100665 | 0.01808377  | 0.026642282 | 0.027091208 | 0.016544604 |
| ENSG0000142065 | 0.015738839 | 0.026112566 | 0.025463982 | 0.014010782 |
| ENSG0000187742 | 0.023933787 | 0.03050853  | 0.027955193 | 0.023990655 |
| ENSG0000171865 | 0.027496107 | 0.032965664 | 0.033257334 | 0.028077804 |
| ENSG0000142507 | 0.02393636  | 0.028268814 | 0.028369827 | 0.020905671 |
| ENSG0000120318 | 0.02269449  | 0.025383682 | 0.024688758 | 0.016549021 |
| ENSG0000141424 | 0.038491381 | 0.043547131 | 0.040638294 | 0.04686115  |
| ENSG0000139508 | 0.038969744 | 0.033486112 | 0.038646866 | 0.03485369  |
| ENSG0000145494 | 0.026041786 | 0.02949942  | 0.028884378 | 0.023474663 |
| ENSG0000155011 | 0.016252666 | 0.025524784 | 0.024993072 | 0.014627411 |

|                 |             |             |             |             |
|-----------------|-------------|-------------|-------------|-------------|
| ENSG00000135373 | 0.016391913 | 0.026719689 | 0.025380512 | 0.016059553 |
| ENSG00000120437 | 0.030896175 | 0.031610727 | 0.031809389 | 0.026255702 |
| ENSG00000127452 | 0.028801466 | 0.036626277 | 0.040408283 | 0.028146451 |
| ENSG00000137221 | 0.030436955 | 0.035817809 | 0.031595869 | 0.02659456  |
| ENSG00000130312 | 0.026069973 | 0.028548544 | 0.029240176 | 0.02476277  |
| ENSG00000198723 | 0.015484347 | 0.025008396 | 0.025136603 | 0.015073412 |
| ENSG00000135679 | 0.029522779 | 0.037470725 | 0.038841146 | 0.034536944 |
| ENSG00000171133 | 0.01718764  | 0.030464396 | 0.02529533  | 0.017864821 |
| ENSG00000078269 | 0.041584081 | 0.040813485 | 0.044306377 | 0.036229562 |
| ENSG00000135917 | 0.018008202 | 0.025632358 | 0.026436983 | 0.016284689 |
| ENSG00000105397 | 0.027661211 | 0.031254967 | 0.030770135 | 0.028729369 |
| ENSG00000087088 | 0.017160067 | 0.027995548 | 0.025770155 | 0.019632872 |
| ENSG00000101438 | 0.061086116 | 0.056614662 | 0.043312864 | 0.042636574 |
| ENSG00000147381 | 0.015767791 | 0.024195011 | 0.025455569 | 0.014599024 |
| ENSG00000154162 | 0.018274127 | 0.025141739 | 0.024948048 | 0.016311452 |
| ENSG00000154122 | 0.053413065 | 0.047132394 | 0.044536092 | 0.043088176 |
| ENSG00000163611 | 0.043033325 | 0.053215699 | 0.040544817 | 0.033393583 |
| ENSG00000126247 | 0.021296149 | 0.027724901 | 0.027728869 | 0.023474966 |
| ENSG00000186967 | 0.019078372 | 0.025315981 | 0.025725763 | 0.01944365  |
| ENSG00000122376 | 0.033409054 | 0.035589033 | 0.030741537 | 0.028161197 |
| ENSG00000171174 | 0.031396648 | 0.033348479 | 0.032259191 | 0.033832375 |
| ENSG00000100027 | 0.026140058 | 0.029776701 | 0.029189853 | 0.028242145 |
| ENSG00000183695 | 0.016314548 | 0.025701286 | 0.025578635 | 0.01608455  |
| ENSG00000118402 | 0.02895821  | 0.027960286 | 0.026621793 | 0.022949105 |
| ENSG00000149488 | 0.01630175  | 0.02469788  | 0.02497986  | 0.015284118 |
| ENSG00000213186 | 0.023676866 | 0.027768132 | 0.027240157 | 0.021665153 |
| ENSG00000033627 | 0.026603614 | 0.035862824 | 0.030853228 | 0.023575893 |
| ENSG00000184058 | 0.017217028 | 0.025103625 | 0.024809283 | 0.014279639 |
| ENSG00000100151 | 0.024658068 | 0.031356278 | 0.035496542 | 0.024125643 |
| ENSG00000013561 | 0.017403385 | 0.026775064 | 0.025605171 | 0.016255706 |
| ENSG00000039319 | 0.034931631 | 0.035603613 | 0.032696292 | 0.040637597 |
| ENSG00000121743 | 0.016023588 | 0.02464665  | 0.025117376 | 0.015573796 |
| ENSG00000170417 | 0.026871388 | 0.031425983 | 0.029442842 | 0.028536844 |
| ENSG00000167862 | 0.0278845   | 0.029117158 | 0.029050415 | 0.025636614 |
| ENSG00000174482 | 0.016438797 | 0.025185894 | 0.024506087 | 0.016046683 |
| ENSG00000135111 | 0.01608753  | 0.024531871 | 0.024692605 | 0.017474075 |
| ENSG00000112175 | 0.023728395 | 0.027350203 | 0.025990296 | 0.017448863 |
| ENSG00000068394 | 0.029427866 | 0.032303784 | 0.031876772 | 0.025326127 |
| ENSG00000134717 | 0.033149018 | 0.037263352 | 0.036747438 | 0.047779454 |
| ENSG00000114638 | 0.014947492 | 0.024947769 | 0.025127421 | 0.015127021 |
| ENSG00000143303 | 0.022038731 | 0.029725908 | 0.031145181 | 0.034250215 |
| ENSG00000090520 | 0.030994541 | 0.038004392 | 0.036309003 | 0.03538298  |
| ENSG00000142684 | 0.03089473  | 0.035138385 | 0.038740619 | 0.035173295 |
| ENSG00000121075 | 0.015051985 | 0.024479613 | 0.025444793 | 0.016193955 |
| ENSG00000135100 | 0.016147378 | 0.025782413 | 0.02524635  | 0.014934664 |
| ENSG00000165434 | 0.01951702  | 0.025957239 | 0.02526369  | 0.015222174 |
| ENSG00000128040 | 0.039799467 | 0.035087049 | 0.038100257 | 0.043472109 |
| ENSG00000060339 | 0.029918952 | 0.033134687 | 0.029036302 | 0.031666243 |
| ENSG00000198554 | 0.039899134 | 0.040874089 | 0.034552328 | 0.031959314 |
| ENSG00000167005 | 0.026831015 | 0.029305539 | 0.029937694 | 0.019795293 |
| ENSG00000070423 | 0.027619887 | 0.034608597 | 0.045269049 | 0.026091959 |
| ENSG00000196968 | 0.075340983 | 0.059511995 | 0.059608358 | 0.055678165 |
| ENSG00000142657 | 0.029941029 | 0.031430022 | 0.033594356 | 0.027224651 |
| ENSG00000055732 | 0.023067077 | 0.027264147 | 0.025187339 | 0.019492732 |

|                 |             |             |             |             |
|-----------------|-------------|-------------|-------------|-------------|
| ENSG00000121864 | 0.016257657 | 0.024666183 | 0.024620322 | 0.014514071 |
| ENSG00000073331 | 0.043976596 | 0.038350196 | 0.035462426 | 0.036356316 |
| ENSG00000103248 | 0.038121025 | 0.036494327 | 0.03173067  | 0.033464667 |
| ENSG00000118898 | 0.016888612 | 0.025539233 | 0.025303345 | 0.015551567 |
| ENSG00000137509 | 0.018305737 | 0.024616997 | 0.025387445 | 0.017375825 |
| ENSG00000126767 | 0.024827516 | 0.031653901 | 0.03176224  | 0.027782761 |
| ENSG00000186912 | 0.014928346 | 0.024282026 | 0.025030135 | 0.01497453  |
| ENSG00000165125 | 0.016735354 | 0.025086998 | 0.025696908 | 0.0158597   |
| ENSG00000123219 | 0.050172523 | 0.050564537 | 0.037741855 | 0.037309848 |
| ENSG00000152208 | 0.015768718 | 0.025803483 | 0.024461443 | 0.01458241  |
| ENSG00000196739 | 0.016206356 | 0.027224375 | 0.024880393 | 0.015349929 |
| ENSG00000174226 | 0.016322458 | 0.025336952 | 0.025491533 | 0.01645832  |
| ENSG00000159352 | 0.027388766 | 0.031824945 | 0.033147543 | 0.02404308  |
| ENSG00000128310 | 0.016487447 | 0.024194084 | 0.024752195 | 0.015247818 |
| ENSG00000179363 | 0.015633888 | 0.024852696 | 0.024562735 | 0.01608964  |
| ENSG00000125971 | 0.018370378 | 0.027296279 | 0.027400893 | 0.021454894 |
| ENSG00000004399 | 0.017236637 | 0.026869592 | 0.027375846 | 0.016454787 |
| ENSG00000155714 | 0.015322107 | 0.025746801 | 0.025223342 | 0.016173659 |
| ENSG00000132965 | 0.070024386 | 0.062226904 | 0.07991446  | 0.08227877  |
| ENSG00000149930 | 0.023131976 | 0.031069599 | 0.027299148 | 0.022601697 |
| ENSG00000125089 | 0.044652208 | 0.045898783 | 0.044629851 | 0.048698203 |
| ENSG00000100298 | 0.04802617  | 0.050967512 | 0.049539014 | 0.044054039 |
| ENSG00000130812 | 0.036459496 | 0.033483585 | 0.039640224 | 0.041844162 |
| ENSG00000099904 | 0.034341297 | 0.03720384  | 0.033265825 | 0.024164818 |
| ENSG00000147676 | 0.015718437 | 0.025472867 | 0.024628948 | 0.01426469  |
| ENSG00000074842 | 0.031048077 | 0.032565297 | 0.035626292 | 0.033200674 |
| ENSG00000129282 | 0.035721998 | 0.043030126 | 0.032648131 | 0.028415963 |
| ENSG00000168621 | 0.01569193  | 0.025740342 | 0.024751714 | 0.01515042  |
| ENSG00000173714 | 0.016877703 | 0.02441172  | 0.025054546 | 0.017899707 |
| ENSG00000089737 | 0.020825737 | 0.028475384 | 0.032377201 | 0.018241255 |
| ENSG00000181016 | 0.021710852 | 0.029155642 | 0.025658991 | 0.017530767 |
| ENSG00000117228 | 0.058889647 | 0.060556879 | 0.058205909 | 0.056818141 |
| ENSG00000162438 | 0.016610665 | 0.025780372 | 0.024466194 | 0.017684448 |
| ENSG00000159176 | 0.037440017 | 0.037794219 | 0.037030271 | 0.028320404 |
| ENSG00000163002 | 0.036324094 | 0.034798083 | 0.037366328 | 0.037870507 |
| ENSG00000196365 | 0.031140001 | 0.030711869 | 0.034369662 | 0.027556527 |
| ENSG00000173085 | 0.075026106 | 0.064243279 | 0.054325498 | 0.058365398 |
| ENSG00000136319 | 0.031677378 | 0.036316605 | 0.036555348 | 0.028251356 |
| ENSG00000227507 | 0.086212141 | 0.067495068 | 0.072976135 | 0.08217916  |
| ENSG00000060140 | 0.019801385 | 0.024796242 | 0.025121406 | 0.017560066 |
| ENSG00000100804 | 0.028208411 | 0.031564037 | 0.029575219 | 0.023006228 |
| ENSG00000106789 | 0.068000467 | 0.117652057 | 0.094008284 | 0.099619668 |
| ENSG00000080511 | 0.017262045 | 0.025459081 | 0.026183763 | 0.015530294 |
| ENSG00000108255 | 0.015328759 | 0.024757108 | 0.026034665 | 0.016117239 |
| ENSG00000113407 | 0.022669872 | 0.030720812 | 0.032031734 | 0.02429204  |
| ENSG00000147854 | 0.032765404 | 0.038479344 | 0.035526144 | 0.026719051 |
| ENSG00000102144 | 0.033706103 | 0.031682242 | 0.036622952 | 0.026986757 |
| ENSG00000108829 | 0.034421566 | 0.036699782 | 0.042098028 | 0.036660161 |
| ENSG00000159377 | 0.025602916 | 0.030646771 | 0.034273203 | 0.020230845 |
| ENSG00000108001 | 0.016531154 | 0.024989268 | 0.025018861 | 0.017715394 |
| ENSG00000147471 | 0.027700655 | 0.038781236 | 0.035136598 | 0.028541926 |
| ENSG00000101457 | 0.025799245 | 0.030684874 | 0.031945902 | 0.024718194 |
| ENSG00000171570 | 0.027528611 | 0.041250554 | 0.043448577 | 0.033897909 |
| ENSG00000204446 | 0.018729206 | 0.02598547  | 0.025336739 | 0.016946763 |



|                 |             |             |             |             |
|-----------------|-------------|-------------|-------------|-------------|
| ENSG00000131781 | 0.016747627 | 0.02680267  | 0.02514922  | 0.017012718 |
| ENSG00000107731 | 0.016045282 | 0.024757708 | 0.026189594 | 0.016169717 |
| ENSG00000197110 | 0.016834642 | 0.02886113  | 0.025966097 | 0.017268365 |
| ENSG00000184867 | 0.081566064 | 0.048138054 | 0.050799637 | 0.05932807  |
| ENSG00000184009 | 0.018156633 | 0.025183902 | 0.025707659 | 0.017314176 |
| ENSG00000166501 | 0.044659448 | 0.040981196 | 0.039654681 | 0.03670241  |
| ENSG00000166170 | 0.033680368 | 0.040766607 | 0.042956035 | 0.031506206 |
| ENSG00000011677 | 0.017177956 | 0.027664721 | 0.024531044 | 0.017640205 |
| ENSG00000162368 | 0.026447047 | 0.033236933 | 0.029244051 | 0.027295428 |
| ENSG00000165186 | 0.015040473 | 0.025481865 | 0.024555423 | 0.015749406 |
| ENSG00000179387 | 0.034548577 | 0.038433075 | 0.033707265 | 0.028623399 |
| ENSG00000182050 | 0.015968265 | 0.025093544 | 0.025194896 | 0.016416491 |
| ENSG00000119547 | 0.01621957  | 0.025247363 | 0.024976899 | 0.015143575 |
| ENSG00000010379 | 0.017924473 | 0.025743776 | 0.026072073 | 0.015645864 |
| ENSG00000167434 | 0.064035202 | 0.047849364 | 0.040018019 | 0.052037255 |
| ENSG00000072849 | 0.031663276 | 0.031996192 | 0.040608575 | 0.030483988 |
| ENSG00000148180 | 0.022314688 | 0.025659537 | 0.028264936 | 0.018184665 |
| ENSG00000172432 | 0.028565464 | 0.032464535 | 0.030365594 | 0.023516989 |
| ENSG00000080824 | 0.030673129 | 0.037622286 | 0.032285945 | 0.036446618 |
| ENSG00000100889 | 0.029102585 | 0.029574307 | 0.030786142 | 0.022585977 |
| ENSG00000179715 | 0.074258737 | 0.057268468 | 0.067485755 | 0.05932664  |
| ENSG00000137168 | 0.034439462 | 0.035367249 | 0.032956626 | 0.034312228 |
| ENSG00000118369 | 0.039109042 | 0.03614835  | 0.042476604 | 0.03299201  |
| ENSG00000171700 | 0.042376706 | 0.046412384 | 0.040968405 | 0.042133142 |
| ENSG00000182791 | 0.014724438 | 0.023885811 | 0.02455389  | 0.014272423 |
| ENSG00000172551 | 0.018281779 | 0.024780566 | 0.024854254 | 0.01623226  |
| ENSG00000126214 | 0.027193604 | 0.031646712 | 0.03318313  | 0.025252104 |
| ENSG00000140391 | 0.034352062 | 0.035427169 | 0.033507706 | 0.039203667 |
| ENSG00000143816 | 0.015315955 | 0.025437718 | 0.02520331  | 0.01548521  |
| ENSG00000019582 | 0.02210617  | 0.030711649 | 0.028322266 | 0.0274537   |
| ENSG00000128791 | 0.054287859 | 0.041356204 | 0.037285191 | 0.041177863 |
| ENSG00000237289 | 0.029325927 | 0.03461811  | 0.028491617 | 0.017374908 |
| ENSG00000163492 | 0.015705128 | 0.025375485 | 0.024069748 | 0.015099098 |
| ENSG00000184254 | 0.027754998 | 0.027998674 | 0.026279188 | 0.051648697 |
| ENSG00000111206 | 0.016590405 | 0.026070452 | 0.025672116 | 0.015622543 |
| ENSG00000160973 | 0.01641393  | 0.025762318 | 0.024083166 | 0.014805676 |
| ENSG00000148606 | 0.018897733 | 0.02905348  | 0.025856104 | 0.017970502 |
| ENSG00000090512 | 0.018903734 | 0.026236395 | 0.02554833  | 0.016624587 |
| ENSG00000176571 | 0.017762973 | 0.027101519 | 0.02718019  | 0.018128637 |
| ENSG00000134371 | 0.028793897 | 0.036069389 | 0.032921705 | 0.028722731 |
| ENSG00000185640 | 0.016733858 | 0.024970611 | 0.024863081 | 0.014891926 |
| ENSG00000204936 | 0.015464055 | 0.024964067 | 0.025310319 | 0.015603703 |
| ENSG00000172803 | 0.015892669 | 0.027302778 | 0.026431778 | 0.016158968 |
| ENSG00000176928 | 0.015704136 | 0.025106923 | 0.024683328 | 0.015278037 |
| ENSG00000212916 | 0.040365895 | 0.035872821 | 0.037060455 | 0.032644397 |
| ENSG00000253958 | 0.058684348 | 0.06243211  | 0.060093698 | 0.057334461 |
| ENSG00000064300 | 0.019180093 | 0.02619135  | 0.026164366 | 0.018375384 |
| ENSG00000170279 | 0.014867239 | 0.024621793 | 0.025229411 | 0.014438071 |
| ENSG00000136237 | 0.085420443 | 0.077491314 | 0.066963308 | 0.073797298 |
| ENSG00000180879 | 0.029183883 | 0.029794388 | 0.033900922 | 0.031002802 |
| ENSG00000178789 | 0.020580069 | 0.035339095 | 0.029171859 | 0.02587161  |
| ENSG00000142583 | 0.095085113 | 0.065656629 | 0.065899753 | 0.07669893  |
| ENSG00000152683 | 0.02103429  | 0.029156666 | 0.02878007  | 0.024937277 |
| ENSG00000180787 | 0.041128461 | 0.03962049  | 0.039241448 | 0.034674156 |

|                 |             |             |             |             |
|-----------------|-------------|-------------|-------------|-------------|
| ENSG00000143891 | 0.073985718 | 0.058918896 | 0.056386558 | 0.06605052  |
| ENSG00000115993 | 0.029468156 | 0.03614608  | 0.033032227 | 0.025286096 |
| ENSG00000177025 | 0.0183527   | 0.026231247 | 0.025376737 | 0.019954328 |
| ENSG00000131446 | 0.026509873 | 0.028471432 | 0.037749983 | 0.02855365  |
| ENSG00000186654 | 0.017116864 | 0.02615642  | 0.026708707 | 0.01712645  |
| ENSG00000163982 | 0.016190452 | 0.024899031 | 0.024704255 | 0.014994476 |
| ENSG00000157703 | 0.016213541 | 0.025974151 | 0.024994645 | 0.014802967 |
| ENSG00000171823 | 0.026013156 | 0.032367227 | 0.029098805 | 0.02370926  |
| ENSG00000166523 | 0.016412256 | 0.024313017 | 0.024763965 | 0.015016143 |
| ENSG00000127922 | 0.019819652 | 0.027263401 | 0.027595295 | 0.017167857 |
| ENSG00000122733 | 0.016568443 | 0.025257408 | 0.024682864 | 0.018276007 |
| ENSG00000135905 | 0.047582906 | 0.051518405 | 0.042891181 | 0.03731006  |
| ENSG00000100416 | 0.024315753 | 0.029629967 | 0.027761586 | 0.024161307 |
| ENSG00000171049 | 0.015768704 | 0.025300179 | 0.02496074  | 0.014479878 |
| ENSG00000101425 | 0.015256743 | 0.02496275  | 0.024785301 | 0.015152997 |
| ENSG00000140323 | 0.015195368 | 0.024023802 | 0.024192319 | 0.016185764 |
| ENSG00000080503 | 0.043306296 | 0.044213974 | 0.042142887 | 0.039169372 |
| ENSG00000035687 | 0.030382631 | 0.03459223  | 0.033049595 | 0.028662288 |
| ENSG00000143314 | 0.035633442 | 0.035845328 | 0.034000223 | 0.023608328 |
| ENSG00000120057 | 0.015417022 | 0.024901618 | 0.025114429 | 0.015424317 |
| ENSG00000164647 | 0.155759857 | 0.088568517 | 0.09314466  | 0.101663866 |
| ENSG00000185130 | 0.037056524 | 0.030744504 | 0.040703926 | 0.032344465 |
| ENSG00000104055 | 0.101147466 | 0.091527404 | 0.078336146 | 0.082290023 |
| ENSG00000157110 | 0.125649976 | 0.105399123 | 0.082076075 | 0.118765845 |
| ENSG00000139223 | 0.015691756 | 0.024896661 | 0.024306985 | 0.014535023 |
| ENSG00000138777 | 0.036647022 | 0.050161611 | 0.049676484 | 0.056270192 |
| ENSG00000197651 | 0.023038143 | 0.032105562 | 0.030155038 | 0.020391652 |
| ENSG00000156486 | 0.017324131 | 0.025291758 | 0.026661835 | 0.01713829  |
| ENSG00000130158 | 0.038452913 | 0.039119975 | 0.04165965  | 0.039123751 |
| ENSG00000163737 | 0.018596549 | 0.025394123 | 0.025977337 | 0.015563669 |
| ENSG00000157557 | 0.041213333 | 0.044481842 | 0.04334482  | 0.035657165 |
| ENSG00000244057 | 0.015484781 | 0.024541704 | 0.025061998 | 0.015623439 |
| ENSG00000166535 | 0.01637484  | 0.024388141 | 0.024802791 | 0.015568355 |
| ENSG00000185219 | 0.016199977 | 0.026753761 | 0.025138391 | 0.01596716  |
| ENSG00000188559 | 0.016951989 | 0.025342279 | 0.023975673 | 0.015090001 |
| ENSG00000164056 | 0.069140102 | 0.079617778 | 0.080294867 | 0.088649179 |
| ENSG00000136859 | 0.057904034 | 0.079138872 | 0.073062949 | 0.075056975 |
| ENSG00000154485 | 0.017995366 | 0.025504727 | 0.024573504 | 0.017242432 |
| ENSG00000186471 | 0.016803776 | 0.026941469 | 0.026785413 | 0.017027529 |
| ENSG00000157992 | 0.018796369 | 0.025409567 | 0.026540721 | 0.017022442 |
| ENSG00000128805 | 0.022750073 | 0.027502112 | 0.02873857  | 0.021806344 |
| ENSG00000094963 | 0.016622873 | 0.025750509 | 0.024801668 | 0.01560127  |
| ENSG00000173905 | 0.037299362 | 0.038527679 | 0.035506301 | 0.036092556 |
| ENSG00000147649 | 0.025874991 | 0.030575773 | 0.030578643 | 0.025322461 |
| ENSG00000174574 | 0.029168493 | 0.038293847 | 0.039466746 | 0.028942226 |
| ENSG00000183161 | 0.045225408 | 0.046050462 | 0.032274791 | 0.032844615 |
| ENSG00000074706 | 0.122626715 | 0.084725467 | 0.077061854 | 0.084317958 |
| ENSG00000180998 | 0.022381192 | 0.026183839 | 0.025807345 | 0.018057068 |
| ENSG00000181817 | 0.024752411 | 0.031381953 | 0.033600102 | 0.029955303 |
| ENSG00000188467 | 0.015621321 | 0.024436365 | 0.023645854 | 0.015060436 |
| ENSG00000173239 | 0.01448977  | 0.02498006  | 0.025007993 | 0.016196316 |
| ENSG00000153253 | 0.021972668 | 0.025182893 | 0.024531312 | 0.016128033 |
| ENSG00000186806 | 0.034104595 | 0.041887399 | 0.041600481 | 0.03790183  |
| ENSG00000011454 | 0.029622783 | 0.035157295 | 0.033244204 | 0.027689746 |

|                 |             |             |             |             |
|-----------------|-------------|-------------|-------------|-------------|
| ENSG00000138669 | 0.016474972 | 0.025264854 | 0.026142777 | 0.016151118 |
| ENSG00000137204 | 0.015881891 | 0.025818649 | 0.025047739 | 0.015150968 |
| ENSG00000108592 | 0.029314735 | 0.033168062 | 0.035374535 | 0.026186351 |
| ENSG00000118939 | 0.030716393 | 0.03368994  | 0.03267346  | 0.026348963 |
| ENSG00000169169 | 0.015407269 | 0.026075553 | 0.024304476 | 0.024466993 |
| ENSG00000144655 | 0.041915326 | 0.041696639 | 0.04298312  | 0.038568978 |
| ENSG00000132837 | 0.015539545 | 0.025228815 | 0.027523496 | 0.014498391 |
| ENSG00000198947 | 0.016349607 | 0.025256635 | 0.025250402 | 0.01641806  |
| ENSG00000254004 | 0.017827083 | 0.026307284 | 0.02637485  | 0.019874187 |
| ENSG00000005844 | 0.064899747 | 0.046084521 | 0.048837207 | 0.042576347 |
| ENSG00000160741 | 0.027439182 | 0.031427172 | 0.036153702 | 0.028904411 |
| ENSG00000075643 | 0.099617529 | 0.081265268 | 0.068391823 | 0.074465955 |
| ENSG00000156642 | 0.026042872 | 0.030741406 | 0.030223254 | 0.023049097 |
| ENSG00000112303 | 0.040978926 | 0.053662981 | 0.040845367 | 0.052466111 |
| ENSG00000186260 | 0.016550752 | 0.025486544 | 0.024829759 | 0.016662289 |
| ENSG00000184166 | 0.018925017 | 0.026596136 | 0.025931859 | 0.01862991  |
| ENSG00000183287 | 0.022598464 | 0.027630204 | 0.032640597 | 0.019412354 |
| ENSG00000082068 | 0.031668909 | 0.032805931 | 0.031572256 | 0.024496767 |
| ENSG00000094880 | 0.025315532 | 0.031692339 | 0.031499715 | 0.021200826 |
| ENSG00000147041 | 0.014134836 | 0.024225889 | 0.025321342 | 0.015309954 |
| ENSG00000138190 | 0.053534878 | 0.049509529 | 0.039455445 | 0.047096208 |
| ENSG00000171855 | 0.029218305 | 0.02870226  | 0.027221457 | 0.015448243 |
| ENSG00000134489 | 0.014514762 | 0.025887232 | 0.025006024 | 0.01582125  |
| ENSG00000109814 | 0.035938352 | 0.041082545 | 0.031763432 | 0.02908131  |
| ENSG00000123810 | 0.033771074 | 0.043774335 | 0.035939237 | 0.037115663 |
| ENSG00000196296 | 0.015791185 | 0.024324029 | 0.025165606 | 0.014840253 |
| ENSG00000180219 | 0.015059226 | 0.024219889 | 0.025001322 | 0.015015314 |
| ENSG00000113389 | 0.01579418  | 0.026692534 | 0.026305254 | 0.015897714 |
| ENSG00000105697 | 0.017215516 | 0.025599162 | 0.025197776 | 0.017201467 |
| ENSG00000124207 | 0.035327511 | 0.035891799 | 0.033581428 | 0.026287284 |
| ENSG00000166428 | 0.018221627 | 0.027096558 | 0.02938537  | 0.016137162 |
| ENSG00000099866 | 0.016754916 | 0.024622601 | 0.024837939 | 0.016492196 |
| ENSG00000145912 | 0.024501732 | 0.028411357 | 0.028904167 | 0.019730614 |
| ENSG00000168906 | 0.045702529 | 0.045501268 | 0.052322203 | 0.044178588 |
| ENSG00000119042 | 0.016644591 | 0.02498726  | 0.024459068 | 0.018527635 |
| ENSG00000125703 | 0.045758096 | 0.037145937 | 0.032669452 | 0.026722596 |
| ENSG00000087303 | 0.019445969 | 0.028828652 | 0.026307165 | 0.019927576 |
| ENSG00000070190 | 0.033091538 | 0.036752324 | 0.037142332 | 0.034146613 |
| ENSG00000137714 | 0.026847733 | 0.036568267 | 0.03470361  | 0.034013419 |
| ENSG00000241837 | 0.016461378 | 0.025191101 | 0.025169742 | 0.015798839 |
| ENSG00000105784 | 0.020894112 | 0.027155572 | 0.025291119 | 0.040051053 |
| ENSG00000100503 | 0.036101914 | 0.039544833 | 0.032032707 | 0.028984407 |
| ENSG00000156381 | 0.054289274 | 0.038353593 | 0.037823527 | 0.038692754 |
| ENSG00000188674 | 0.013528402 | 0.023444434 | 0.023518746 | 0.013005628 |
| ENSG00000123684 | 0.045853532 | 0.044381211 | 0.046759264 | 0.045581085 |
| ENSG00000079150 | 0.022540009 | 0.030122827 | 0.027137642 | 0.025310798 |
| ENSG00000074696 | 0.034620461 | 0.036738784 | 0.033298316 | 0.034149095 |
| ENSG00000018236 | 0.015564821 | 0.026710287 | 0.025229897 | 0.015997296 |
| ENSG00000175198 | 0.036952458 | 0.035777702 | 0.031256303 | 0.032619603 |
| ENSG00000165695 | 0.032758975 | 0.035848978 | 0.033866913 | 0.028704496 |
| ENSG00000151514 | 0.022512545 | 0.025546025 | 0.026085071 | 0.015738216 |
| ENSG00000158423 | 0.017254701 | 0.024566833 | 0.024650013 | 0.015326917 |
| ENSG00000139625 | 0.025391907 | 0.032485298 | 0.027709486 | 0.022804176 |
| ENSG00000112200 | 0.039689524 | 0.034149903 | 0.033887789 | 0.02905784  |

|                 |             |             |             |             |
|-----------------|-------------|-------------|-------------|-------------|
| ENSG00000151834 | 0.016010414 | 0.024950528 | 0.025878684 | 0.015831573 |
| ENSG00000184459 | 0.01520824  | 0.024839588 | 0.024466077 | 0.015708244 |
| ENSG00000068489 | 0.041539058 | 0.035537057 | 0.034755015 | 0.028780402 |
| ENSG00000128524 | 0.019894133 | 0.027970437 | 0.027510539 | 0.020722177 |
| ENSG00000169718 | 0.022974674 | 0.027475662 | 0.02692133  | 0.026955807 |
| ENSG00000159450 | 0.018117197 | 0.025432969 | 0.026603172 | 0.019401169 |
| ENSG00000164334 | 0.017511239 | 0.026474479 | 0.025159246 | 0.015477642 |
| ENSG00000100991 | 0.020738908 | 0.026039478 | 0.031615042 | 0.021255804 |
| ENSG00000111674 | 0.067353999 | 0.04861233  | 0.044907088 | 0.05833817  |
| ENSG00000144635 | 0.029047436 | 0.036249828 | 0.035065912 | 0.037549927 |
| ENSG00000111670 | 0.034362841 | 0.035732492 | 0.04320069  | 0.032854496 |
| ENSG00000115041 | 0.015909822 | 0.025220753 | 0.024883139 | 0.015407981 |
| ENSG00000074582 | 0.032787511 | 0.032309877 | 0.029580554 | 0.02374932  |
| ENSG00000116141 | 0.039227914 | 0.030157992 | 0.03502987  | 0.021888507 |
| ENSG00000133808 | 0.016480755 | 0.025733629 | 0.024804916 | 0.015001833 |
| ENSG00000102870 | 0.015069113 | 0.024754988 | 0.024877743 | 0.015216223 |
| ENSG00000102189 | 0.02262195  | 0.030785461 | 0.026990612 | 0.023090502 |
| ENSG00000213199 | 0.017347993 | 0.025842732 | 0.02618707  | 0.01534516  |
| ENSG00000185880 | 0.034506396 | 0.044336874 | 0.031622265 | 0.025485879 |
| ENSG00000007174 | 0.016341627 | 0.023945435 | 0.024716821 | 0.015931237 |
| ENSG00000102710 | 0.025537755 | 0.031653746 | 0.029169787 | 0.026039425 |
| ENSG00000188295 | 0.040978108 | 0.037498078 | 0.03850051  | 0.0399744   |
| ENSG00000165973 | 0.018856563 | 0.025117255 | 0.025426106 | 0.015920154 |
| ENSG00000157119 | 0.015731494 | 0.024818252 | 0.024456991 | 0.015672343 |
| ENSG00000067113 | 0.016134626 | 0.026245231 | 0.026270835 | 0.015874866 |
| ENSG00000101180 | 0.016223313 | 0.025186752 | 0.025365246 | 0.015386452 |
| ENSG00000102539 | 0.018031651 | 0.025422988 | 0.024053546 | 0.017070136 |
| ENSG00000152795 | 0.040462259 | 0.037737852 | 0.039273304 | 0.037350211 |
| ENSG00000089159 | 0.038213621 | 0.03574414  | 0.034571901 | 0.033725199 |
| ENSG00000100528 | 0.028411456 | 0.037481672 | 0.030694678 | 0.022655078 |
| ENSG00000186638 | 0.026869543 | 0.03284934  | 0.036213881 | 0.02186154  |
| ENSG00000131116 | 0.031838333 | 0.035645395 | 0.032520523 | 0.03084677  |
| ENSG00000119655 | 0.033503184 | 0.031759839 | 0.032312319 | 0.029239924 |
| ENSG00000197705 | 0.034846419 | 0.064762967 | 0.063281475 | 0.052754077 |
| ENSG00000188763 | 0.07081437  | 0.067792585 | 0.055767436 | 0.049689182 |
| ENSG00000166986 | 0.02723214  | 0.033796811 | 0.030598624 | 0.028324242 |
| ENSG00000120071 | 0.021545244 | 0.029392157 | 0.033557135 | 0.023284839 |
| ENSG00000147439 | 0.030168754 | 0.034436625 | 0.037347928 | 0.026534446 |
| ENSG00000172936 | 0.034611409 | 0.041110746 | 0.0454327   | 0.037503876 |
| ENSG00000006576 | 0.035352624 | 0.03889348  | 0.032572202 | 0.031214093 |
| ENSG00000170537 | 0.015747951 | 0.025682962 | 0.024344347 | 0.01548655  |
| ENSG00000170162 | 0.01823607  | 0.027216012 | 0.026397197 | 0.018514855 |
| ENSG00000131142 | 0.027220271 | 0.029185131 | 0.032494174 | 0.028677226 |
| ENSG00000133048 | 0.049731177 | 0.070888377 | 0.057118674 | 0.057780019 |
| ENSG00000170271 | 0.016158421 | 0.02587627  | 0.02661521  | 0.016704839 |
| ENSG00000120832 | 0.017028186 | 0.026704208 | 0.02546786  | 0.016924016 |
| ENSG00000175582 | 0.033558564 | 0.041679892 | 0.034156626 | 0.031534644 |
| ENSG00000131061 | 0.017691282 | 0.024511439 | 0.025987373 | 0.014991284 |
| ENSG00000125952 | 0.021749703 | 0.029133512 | 0.029581361 | 0.024541925 |
| ENSG00000152034 | 0.016906944 | 0.02481452  | 0.024107387 | 0.015796434 |
| ENSG00000070526 | 0.01666587  | 0.024935165 | 0.025086248 | 0.014439549 |
| ENSG00000113272 | 0.020209009 | 0.029150741 | 0.028995627 | 0.020586013 |
| ENSG00000186970 | 0.017345364 | 0.024591138 | 0.025888618 | 0.015446616 |
| ENSG00000242950 | 0.01479616  | 0.024464352 | 0.025145004 | 0.015477808 |

|                 |             |             |             |             |
|-----------------|-------------|-------------|-------------|-------------|
| ENSG00000234024 | 0.045503828 | 0.02990147  | 0.027048816 | 0.036768147 |
| ENSG00000121903 | 0.014509429 | 0.02620092  | 0.0248803   | 0.016087273 |
| ENSG00000135549 | 0.019224066 | 0.026200371 | 0.024782645 | 0.020137465 |
| ENSG00000156564 | 0.015920899 | 0.025678493 | 0.025440524 | 0.016008249 |
| ENSG00000102921 | 0.048888156 | 0.041640152 | 0.042704117 | 0.039833726 |
| ENSG00000170265 | 0.01966611  | 0.029100679 | 0.034191533 | 0.022312136 |
| ENSG00000180329 | 0.02496946  | 0.030770705 | 0.030200374 | 0.023141934 |
| ENSG00000176108 | 0.021550935 | 0.027106357 | 0.030743668 | 0.020325246 |
| ENSG00000078399 | 0.015427817 | 0.024494427 | 0.025444655 | 0.014963299 |
| ENSG00000112309 | 0.017305946 | 0.026858931 | 0.026949926 | 0.018865394 |
| ENSG00000047634 | 0.112154765 | 0.090702714 | 0.067244932 | 0.090533306 |
| ENSG00000163909 | 0.029047289 | 0.02945186  | 0.031091295 | 0.028055345 |
| ENSG00000106080 | 0.038578362 | 0.034984217 | 0.037409145 | 0.040667027 |
| ENSG00000169562 | 0.016203309 | 0.025266657 | 0.025678016 | 0.014786082 |
| ENSG00000126698 | 0.026307894 | 0.031723458 | 0.031454607 | 0.02272842  |
| ENSG00000092108 | 0.020013046 | 0.028267906 | 0.02979595  | 0.022660484 |
| ENSG00000243955 | 0.016832284 | 0.024698751 | 0.025352711 | 0.016431448 |
| ENSG00000128845 | 0.015335933 | 0.025279018 | 0.024373854 | 0.016287486 |
| ENSG00000072864 | 0.029595042 | 0.0373206   | 0.032545933 | 0.028564469 |
| ENSG00000077147 | 0.024296555 | 0.029936787 | 0.030611056 | 0.02175547  |
| ENSG00000088205 | 0.0287293   | 0.034364961 | 0.032234943 | 0.026555841 |
| ENSG00000140525 | 0.043243912 | 0.042927487 | 0.034147302 | 0.033513967 |
| ENSG00000133169 | 0.028730023 | 0.02738518  | 0.026919867 | 0.018013496 |
| ENSG00000142544 | 0.026120045 | 0.031081303 | 0.029251789 | 0.031107947 |
| ENSG00000154328 | 0.031412175 | 0.034869542 | 0.033157688 | 0.026297851 |
| ENSG00000189068 | 0.015167436 | 0.026050182 | 0.02408134  | 0.015603625 |
| ENSG00000168229 | 0.016828749 | 0.025704778 | 0.024113695 | 0.015501233 |
| ENSG00000189369 | 0.027318081 | 0.036586423 | 0.033732329 | 0.025587175 |
| ENSG00000197846 | 0.079633301 | 0.056249278 | 0.07666212  | 0.07408853  |
| ENSG00000104818 | 0.019041357 | 0.029780231 | 0.026301443 | 0.017325414 |
| ENSG00000141682 | 0.03171686  | 0.032356099 | 0.036303809 | 0.030545019 |
| ENSG00000140332 | 0.042888203 | 0.038835422 | 0.038031968 | 0.036980412 |
| ENSG00000152592 | 0.015737463 | 0.025468696 | 0.025285269 | 0.01499645  |
| ENSG00000183034 | 0.017214956 | 0.026212842 | 0.024791375 | 0.01723533  |
| ENSG00000065328 | 0.047627705 | 0.043586116 | 0.035131466 | 0.04001927  |
| ENSG00000181378 | 0.014172115 | 0.025140462 | 0.024826657 | 0.014628143 |
| ENSG00000097007 | 0.035789452 | 0.036229893 | 0.03845273  | 0.028715733 |
| ENSG00000032444 | 0.028540811 | 0.031348959 | 0.027123217 | 0.026963285 |
| ENSG00000141325 | 0.029529519 | 0.035133157 | 0.033755157 | 0.022634595 |
| ENSG00000174500 | 0.054991005 | 0.067609206 | 0.060421349 | 0.063197118 |
| ENSG00000048140 | 0.025124613 | 0.033423091 | 0.032799839 | 0.025591431 |
| ENSG00000138798 | 0.016925226 | 0.024167052 | 0.02498375  | 0.015176756 |
| ENSG00000163645 | 0.016496616 | 0.0247461   | 0.024685194 | 0.015477786 |
| ENSG00000132329 | 0.118489067 | 0.106225747 | 0.105592641 | 0.102949832 |
| ENSG00000136051 | 0.034756575 | 0.038831244 | 0.034905631 | 0.032905914 |
| ENSG00000150628 | 0.016878195 | 0.025005838 | 0.025426624 | 0.015370531 |
| ENSG00000173726 | 0.025543967 | 0.032672946 | 0.028982323 | 0.02575044  |
| ENSG00000140955 | 0.026899938 | 0.029157309 | 0.043286408 | 0.018419957 |
| ENSG00000133488 | 0.01543281  | 0.025972941 | 0.02598216  | 0.016387266 |
| ENSG00000160716 | 0.01635548  | 0.024148027 | 0.024108886 | 0.015194838 |
| ENSG00000147443 | 0.03378707  | 0.044330517 | 0.04151049  | 0.03891837  |
| ENSG00000160284 | 0.06658035  | 0.044490973 | 0.03771814  | 0.135364676 |
| ENSG00000048162 | 0.031211614 | 0.033119601 | 0.035373718 | 0.033325649 |
| ENSG00000004948 | 0.016139416 | 0.024149075 | 0.024832288 | 0.015899082 |

|                 |             |             |             |             |
|-----------------|-------------|-------------|-------------|-------------|
| ENSG00000168995 | 0.016587331 | 0.026291064 | 0.027667863 | 0.015798864 |
| ENSG00000145860 | 0.037465422 | 0.043327334 | 0.042649601 | 0.037453483 |
| ENSG00000172336 | 0.026796821 | 0.027368162 | 0.032388251 | 0.027921043 |
| ENSG00000036672 | 0.017062393 | 0.026162432 | 0.025419877 | 0.018875074 |
| ENSG00000041802 | 0.029729487 | 0.031292056 | 0.031691514 | 0.027386012 |
| ENSG00000164430 | 0.045289132 | 0.041184144 | 0.04252722  | 0.037296622 |
| ENSG00000123444 | 0.014654444 | 0.025696849 | 0.024814234 | 0.014827518 |
| ENSG00000065000 | 0.029859487 | 0.035486906 | 0.034397502 | 0.028162804 |
| ENSG00000180964 | 0.02747872  | 0.0300815   | 0.02755073  | 0.019780816 |
| ENSG00000101333 | 0.03029719  | 0.029195539 | 0.028295912 | 0.023759083 |
| ENSG00000111596 | 0.019077915 | 0.02805485  | 0.029618119 | 0.018246255 |
| ENSG00000166347 | 0.041272537 | 0.035907733 | 0.034085052 | 0.032777953 |
| ENSG00000182704 | 0.016309095 | 0.025198568 | 0.025213062 | 0.015844986 |
| ENSG00000179520 | 0.018184603 | 0.025095282 | 0.025350689 | 0.014342084 |
| ENSG00000080910 | 0.01631619  | 0.025557611 | 0.025905649 | 0.017053885 |
| ENSG00000113638 | 0.037592879 | 0.043079177 | 0.033802833 | 0.030074147 |
| ENSG00000130703 | 0.024342199 | 0.030300194 | 0.030435119 | 0.021506469 |
| ENSG00000130827 | 0.021261646 | 0.030572432 | 0.03112097  | 0.019001921 |
| ENSG00000152254 | 0.015637796 | 0.024433785 | 0.024798492 | 0.01595826  |
| ENSG00000164821 | 0.016443978 | 0.026922937 | 0.027303276 | 0.016882244 |
| ENSG00000214026 | 0.022313103 | 0.027648482 | 0.027608612 | 0.018755877 |
| ENSG00000155657 | 0.020367857 | 0.027622545 | 0.029253805 | 0.018449652 |
| ENSG00000125851 | 0.015383884 | 0.025124772 | 0.024789688 | 0.016951887 |
| ENSG00000140350 | 0.036620328 | 0.031402022 | 0.028274358 | 0.028134103 |
| ENSG00000181752 | 0.017556764 | 0.027490177 | 0.02672084  | 0.018886269 |
| ENSG00000006062 | 0.038196065 | 0.044614322 | 0.043255492 | 0.03271385  |
| ENSG00000137992 | 0.03210633  | 0.037377416 | 0.032238939 | 0.025174233 |
| ENSG00000108639 | 0.035813292 | 0.038600404 | 0.031255224 | 0.035096164 |
| ENSG00000118246 | 0.0266301   | 0.031963434 | 0.030028135 | 0.027506841 |
| ENSG00000153179 | 0.018806374 | 0.026577797 | 0.025593747 | 0.016481506 |
| ENSG00000139352 | 0.120560526 | 0.098155164 | 0.063091418 | 0.091849825 |
| ENSG00000176034 | 0.015425495 | 0.025107531 | 0.025280456 | 0.01545639  |
| ENSG00000135226 | 0.06948393  | 0.049131774 | 0.029414432 | 0.046112281 |
| ENSG00000125965 | 0.016528754 | 0.025188771 | 0.025873395 | 0.015400581 |
| ENSG00000139269 | 0.095832071 | 0.064210873 | 0.055269849 | 0.067126429 |
| ENSG00000188428 | 0.032788603 | 0.03356919  | 0.031415555 | 0.022769652 |
| ENSG00000161574 | 0.017011116 | 0.026036198 | 0.025590936 | 0.016209313 |
| ENSG00000138615 | 0.021665786 | 0.026876836 | 0.025997832 | 0.015779883 |
| ENSG00000180332 | 0.015775512 | 0.024768315 | 0.025427869 | 0.01417047  |
| ENSG00000205030 | 0.015413598 | 0.025972143 | 0.024763166 | 0.016109171 |
| ENSG00000130477 | 0.01516768  | 0.024950358 | 0.024668882 | 0.015148912 |
| ENSG00000090020 | 0.038209412 | 0.039701399 | 0.038758206 | 0.039083227 |
| ENSG00000138495 | 0.025086899 | 0.028768353 | 0.031679821 | 0.022657394 |
| ENSG00000169385 | 0.015495269 | 0.025948796 | 0.024487721 | 0.015463449 |
| ENSG00000119820 | 0.024045557 | 0.030955295 | 0.028749239 | 0.023427847 |
| ENSG00000198856 | 0.029630539 | 0.033368121 | 0.032851734 | 0.028152293 |
| ENSG00000174564 | 0.022408179 | 0.030081027 | 0.032428732 | 0.020340734 |
| ENSG00000105866 | 0.01546038  | 0.024808764 | 0.025021351 | 0.015462108 |
| ENSG00000168032 | 0.015034409 | 0.024879854 | 0.024182765 | 0.014766271 |
| ENSG00000056586 | 0.0256528   | 0.034621248 | 0.03240452  | 0.020182212 |
| ENSG00000068971 | 0.051796048 | 0.039465558 | 0.040791207 | 0.047481957 |
| ENSG00000187189 | 0.040478395 | 0.036806918 | 0.034315898 | 0.035914439 |
| ENSG00000039068 | 0.131207618 | 0.109332643 | 0.108601569 | 0.115540444 |
| ENSG00000153487 | 0.019550544 | 0.02869203  | 0.026186521 | 0.020442013 |

|                 |             |             |             |             |
|-----------------|-------------|-------------|-------------|-------------|
| ENSG00000185261 | 0.0180295   | 0.026924848 | 0.02551276  | 0.015960442 |
| ENSG00000116752 | 0.025673258 | 0.034580415 | 0.033495548 | 0.034232004 |
| ENSG00000166257 | 0.016322908 | 0.025185191 | 0.025414251 | 0.014513931 |
| ENSG00000074771 | 0.015475143 | 0.025338882 | 0.024501731 | 0.015702325 |
| ENSG00000137817 | 0.025809943 | 0.033538847 | 0.032079255 | 0.028166421 |
| ENSG00000166473 | 0.016033142 | 0.024577789 | 0.024357581 | 0.014927797 |
| ENSG00000169592 | 0.028077813 | 0.030736571 | 0.033183839 | 0.025601434 |
| ENSG00000112234 | 0.022823364 | 0.03385945  | 0.031480782 | 0.020707207 |
| ENSG00000053770 | 0.029444619 | 0.036496274 | 0.031386505 | 0.029199895 |
| ENSG00000107560 | 0.032876529 | 0.038448353 | 0.039993341 | 0.032864224 |
| ENSG00000178852 | 0.015062213 | 0.025404616 | 0.024774057 | 0.015301264 |
| ENSG00000085840 | 0.052420595 | 0.042003193 | 0.035130042 | 0.036793995 |
| ENSG00000187180 | 0.016429268 | 0.025021457 | 0.026107286 | 0.016317767 |
| ENSG00000197748 | 0.015063351 | 0.025749227 | 0.025037014 | 0.014507957 |
| ENSG00000060138 | 0.032252652 | 0.031564199 | 0.029191006 | 0.028728876 |
| ENSG00000162733 | 0.059323801 | 0.047878276 | 0.039075461 | 0.046057628 |
| ENSG00000137841 | 0.063315699 | 0.054429845 | 0.043899679 | 0.043015021 |
| ENSG00000107745 | 0.030831924 | 0.032036323 | 0.03145583  | 0.022634014 |
| ENSG00000153208 | 0.045925899 | 0.037910674 | 0.033590285 | 0.031008653 |
| ENSG00000162298 | 0.03427238  | 0.036180031 | 0.045338615 | 0.033571705 |
| ENSG00000175564 | 0.015735473 | 0.025147406 | 0.025077205 | 0.01525043  |
| ENSG00000144821 | 0.016887286 | 0.025660451 | 0.025430666 | 0.016717949 |
| ENSG00000153976 | 0.019962502 | 0.026831541 | 0.024730905 | 0.018274282 |
| ENSG00000134775 | 0.126444703 | 0.116335721 | 0.055903698 | 0.090297396 |
| ENSG00000100591 | 0.028844626 | 0.034805807 | 0.031427123 | 0.028593164 |
| ENSG00000153774 | 0.083306722 | 0.075318239 | 0.065682508 | 0.086025304 |
| ENSG00000185736 | 0.039100755 | 0.033810974 | 0.030932172 | 0.036677634 |
| ENSG00000163596 | 0.016138563 | 0.025348506 | 0.025033049 | 0.015985756 |
| ENSG00000187516 | 0.015254107 | 0.024110918 | 0.024762707 | 0.0151314   |
| ENSG00000160087 | 0.016951649 | 0.026166152 | 0.027289132 | 0.018105641 |
| ENSG00000181693 | 0.018898302 | 0.025011577 | 0.026330591 | 0.01768504  |
| ENSG00000132677 | 0.015575752 | 0.025803924 | 0.025529612 | 0.015870905 |
| ENSG00000112343 | 0.034404309 | 0.038900154 | 0.045487395 | 0.028639192 |
| ENSG00000158321 | 0.108837563 | 0.099185129 | 0.079481827 | 0.090271278 |
| ENSG00000188910 | 0.019324164 | 0.027915365 | 0.028085017 | 0.018566619 |
| ENSG00000175646 | 0.014992994 | 0.02392901  | 0.02483546  | 0.01446405  |
| ENSG00000149115 | 0.045260183 | 0.036704848 | 0.040348935 | 0.03493354  |
| ENSG00000187021 | 0.019348374 | 0.026043685 | 0.029239084 | 0.016873894 |
| ENSG00000159251 | 0.021227408 | 0.025810974 | 0.025505551 | 0.015990424 |
| ENSG00000205364 | 0.054225195 | 0.057497798 | 0.064509628 | 0.059428487 |
| ENSG00000188846 | 0.050814898 | 0.046962005 | 0.059507259 | 0.039017917 |
| ENSG00000144320 | 0.035228966 | 0.038538715 | 0.030559162 | 0.02421144  |
| ENSG00000115109 | 0.016942639 | 0.026354733 | 0.025530662 | 0.017842195 |
| ENSG00000177143 | 0.017208266 | 0.025959203 | 0.026320518 | 0.016908441 |
| ENSG00000132182 | 0.031770488 | 0.03440515  | 0.032107836 | 0.023527218 |
| ENSG00000146555 | 0.014529434 | 0.024844732 | 0.024961684 | 0.014372642 |
| ENSG00000170113 | 0.02881147  | 0.031919815 | 0.032587019 | 0.028901647 |
| ENSG00000089123 | 0.026252824 | 0.035851467 | 0.029733407 | 0.020879238 |
| ENSG00000171262 | 0.019139773 | 0.025611669 | 0.025627652 | 0.017050012 |
| ENSG00000147614 | 0.016249218 | 0.025886482 | 0.026364667 | 0.017382097 |
| ENSG00000070501 | 0.030447308 | 0.033817863 | 0.032480237 | 0.024726392 |
| ENSG00000154415 | 0.017672061 | 0.025634888 | 0.02531956  | 0.015349441 |
| ENSG00000154743 | 0.035168185 | 0.034458355 | 0.037268158 | 0.031218337 |
| ENSG00000122882 | 0.022083715 | 0.028613067 | 0.030378945 | 0.023389669 |

|                 |             |             |             |             |
|-----------------|-------------|-------------|-------------|-------------|
| ENSG00000170775 | 0.01589616  | 0.024772412 | 0.024799652 | 0.015355038 |
| ENSG00000079999 | 0.017073162 | 0.026267287 | 0.024547928 | 0.015102123 |
| ENSG00000177791 | 0.031606519 | 0.045199023 | 0.032951429 | 0.027637717 |
| ENSG00000095303 | 0.088745404 | 0.076421758 | 0.054103686 | 0.069350542 |
| ENSG00000123243 | 0.01793784  | 0.026477533 | 0.026589524 | 0.017248369 |
| ENSG00000124196 | 0.016083858 | 0.024566645 | 0.024275851 | 0.017794207 |
| ENSG00000175938 | 0.038915967 | 0.033631761 | 0.033479709 | 0.035548407 |
| ENSG00000177427 | 0.020480585 | 0.029564151 | 0.028508711 | 0.021847661 |
| ENSG00000196642 | 0.03344841  | 0.029847424 | 0.035041392 | 0.031363825 |
| ENSG00000074047 | 0.016355929 | 0.024716223 | 0.025877026 | 0.014198033 |
| ENSG00000107902 | 0.061716976 | 0.06110329  | 0.063500948 | 0.062198011 |
| ENSG00000170703 | 0.014930325 | 0.025164903 | 0.024580303 | 0.01432463  |
| ENSG00000140199 | 0.040048894 | 0.039100115 | 0.041107761 | 0.040419757 |
| ENSG00000162374 | 0.021241262 | 0.024869935 | 0.026251809 | 0.015484821 |
| ENSG00000164933 | 0.033193016 | 0.037456877 | 0.030098544 | 0.034818665 |
| ENSG00000102547 | 0.018120131 | 0.026484686 | 0.024770932 | 0.015600002 |
| ENSG00000068724 | 0.016853101 | 0.026019585 | 0.025939057 | 0.015615219 |
| ENSG00000168158 | 0.014969314 | 0.024718651 | 0.025786904 | 0.015300928 |
| ENSG00000161544 | 0.017887877 | 0.02453507  | 0.025029388 | 0.015846341 |
| ENSG00000132854 | 0.014913033 | 0.024526743 | 0.025253541 | 0.014393743 |
| ENSG00000115163 | 0.053335913 | 0.042406843 | 0.042284923 | 0.043144326 |
| ENSG00000105617 | 0.026491311 | 0.035703298 | 0.040216052 | 0.025394763 |
| ENSG00000204568 | 0.020450543 | 0.02586878  | 0.02889983  | 0.020450875 |
| ENSG00000036549 | 0.030204043 | 0.032933226 | 0.034934622 | 0.025642178 |
| ENSG00000065534 | 0.015965773 | 0.025993219 | 0.025815768 | 0.015844944 |
| ENSG00000132130 | 0.023651176 | 0.026660846 | 0.025974946 | 0.02231945  |
| ENSG00000152377 | 0.023653717 | 0.025519186 | 0.027369769 | 0.019000031 |
| ENSG00000135094 | 0.020512133 | 0.026302226 | 0.026350687 | 0.017654247 |
| ENSG00000091622 | 0.016107696 | 0.025048279 | 0.024610943 | 0.015330721 |
| ENSG00000138433 | 0.020250477 | 0.027184759 | 0.029462164 | 0.018784414 |
| ENSG00000148158 | 0.035748888 | 0.044858725 | 0.042367739 | 0.040192131 |
| ENSG00000214022 | 0.017085092 | 0.025746441 | 0.025249924 | 0.015109616 |
| ENSG00000115307 | 0.022836938 | 0.027051018 | 0.02851476  | 0.023434081 |
| ENSG00000167580 | 0.017536337 | 0.026006489 | 0.02661342  | 0.01643952  |
| ENSG00000171595 | 0.017523499 | 0.025050612 | 0.024902734 | 0.016748268 |
| ENSG00000175931 | 0.025194602 | 0.030543635 | 0.033293818 | 0.024028602 |
| ENSG00000174038 | 0.016613195 | 0.025901009 | 0.026409018 | 0.015599515 |
| ENSG00000140682 | 0.064645778 | 0.064115262 | 0.054907323 | 0.075363508 |
| ENSG00000147894 | 0.044167368 | 0.042451559 | 0.043632519 | 0.04467567  |
| ENSG00000177675 | 0.159146695 | 0.118271728 | 0.100510099 | 0.12105643  |
| ENSG00000074071 | 0.027140133 | 0.028659791 | 0.030232695 | 0.024683325 |
| ENSG00000139219 | 0.021515388 | 0.027623127 | 0.02601112  | 0.017366493 |
| ENSG00000184014 | 0.074595405 | 0.0603203   | 0.067365459 | 0.065290057 |
| ENSG00000100288 | 0.037669104 | 0.046374593 | 0.043044162 | 0.039849354 |
| ENSG00000183570 | 0.061372876 | 0.056886808 | 0.062040434 | 0.053444976 |
| ENSG00000112079 | 0.034776761 | 0.042488803 | 0.033090287 | 0.033383404 |
| ENSG00000133710 | 0.015028504 | 0.024890081 | 0.024758209 | 0.014914983 |
| ENSG00000131828 | 0.022602283 | 0.027268906 | 0.026475108 | 0.019788884 |
| ENSG00000167395 | 0.018587974 | 0.029301648 | 0.02806004  | 0.019207397 |
| ENSG00000178913 | 0.02710763  | 0.035098079 | 0.037539546 | 0.02581727  |
| ENSG00000148965 | 0.016510543 | 0.027406034 | 0.026043588 | 0.01633298  |
| ENSG00000112902 | 0.030428036 | 0.028311916 | 0.025110703 | 0.021052244 |
| ENSG00000174804 | 0.016935703 | 0.025746173 | 0.026022505 | 0.016418634 |
| ENSG00000137691 | 0.017777903 | 0.026086661 | 0.025814174 | 0.017393471 |



|                 |             |             |             |             |
|-----------------|-------------|-------------|-------------|-------------|
| ENSG00000101162 | 0.016806914 | 0.02654282  | 0.025803356 | 0.015819666 |
| ENSG00000168830 | 0.015820686 | 0.025516089 | 0.025383822 | 0.01424009  |
| ENSG00000150337 | 0.01884406  | 0.027350384 | 0.027378569 | 0.020624744 |
| ENSG00000136930 | 0.020133339 | 0.027713959 | 0.027846616 | 0.02019988  |
| ENSG00000161960 | 0.022415278 | 0.026491065 | 0.026215376 | 0.018035768 |
| ENSG00000164944 | 0.028746087 | 0.034733921 | 0.033711375 | 0.022932729 |
| ENSG00000168101 | 0.025284831 | 0.030930629 | 0.032329283 | 0.022902381 |
| ENSG00000185436 | 0.087082565 | 0.060096415 | 0.05954729  | 0.077243807 |
| ENSG00000126970 | 0.026155235 | 0.030196781 | 0.029198498 | 0.025377557 |
| ENSG00000203896 | 0.073718619 | 0.065154338 | 0.063020016 | 0.065638627 |
| ENSG00000137962 | 0.016177229 | 0.025902775 | 0.025183895 | 0.016915368 |
| ENSG00000125651 | 0.023286217 | 0.032595245 | 0.035741874 | 0.021688764 |
| ENSG00000198889 | 0.01636072  | 0.025186809 | 0.024947743 | 0.01480117  |
| ENSG00000204618 | 0.015327965 | 0.025098323 | 0.025461526 | 0.01548387  |
| ENSG00000165091 | 0.015061037 | 0.02491229  | 0.024384116 | 0.014734313 |
| ENSG00000163482 | 0.042342584 | 0.047980284 | 0.036450949 | 0.031292999 |
| ENSG00000156650 | 0.028629238 | 0.030263781 | 0.033163719 | 0.02772414  |
| ENSG00000125378 | 0.016274814 | 0.024924527 | 0.025305194 | 0.014799641 |
| ENSG00000143952 | 0.032328204 | 0.03871059  | 0.032818444 | 0.031558559 |
| ENSG00000103966 | 0.025181053 | 0.030939256 | 0.036045276 | 0.029205351 |
| ENSG00000170631 | 0.028184051 | 0.040863787 | 0.043204646 | 0.032269612 |
| ENSG00000173212 | 0.057757387 | 0.050950444 | 0.038485965 | 0.039652185 |
| ENSG00000108389 | 0.025667936 | 0.030737211 | 0.030150975 | 0.022796296 |
| ENSG00000005961 | 0.03403885  | 0.029323148 | 0.03041595  | 0.023274244 |
| ENSG00000167799 | 0.048706247 | 0.040511365 | 0.043105257 | 0.050066201 |
| ENSG00000065978 | 0.017016981 | 0.025135747 | 0.024703919 | 0.017666114 |
| ENSG00000189195 | 0.017133434 | 0.025959854 | 0.024139338 | 0.015701232 |
| ENSG00000166164 | 0.02686516  | 0.034567992 | 0.029676921 | 0.019277829 |
| ENSG00000110448 | 0.01827876  | 0.024712299 | 0.024452147 | 0.016238841 |
| ENSG00000005801 | 0.028015761 | 0.034199292 | 0.036828311 | 0.030547127 |
| ENSG00000113369 | 0.063041216 | 0.059457086 | 0.05259218  | 0.058987587 |
| ENSG00000110455 | 0.056249565 | 0.075051708 | 0.064959307 | 0.029191718 |
| ENSG00000110318 | 0.015743753 | 0.024758093 | 0.025063725 | 0.014879899 |
| ENSG00000066926 | 0.037400175 | 0.044961354 | 0.044334905 | 0.033189316 |
| ENSG00000162227 | 0.031012784 | 0.036738982 | 0.042732375 | 0.032250717 |
| ENSG00000120265 | 0.02872953  | 0.030925876 | 0.028830605 | 0.02272588  |
| ENSG00000105516 | 0.037762315 | 0.033752387 | 0.035019666 | 0.036028541 |
| ENSG00000184838 | 0.016233161 | 0.025172669 | 0.025694194 | 0.016294085 |
| ENSG00000090975 | 0.015369747 | 0.024965768 | 0.024344057 | 0.015014122 |
| ENSG00000135999 | 0.031225613 | 0.042065688 | 0.038685207 | 0.035944904 |
| ENSG00000186119 | 0.017378638 | 0.02624292  | 0.024195883 | 0.015602183 |
| ENSG00000198569 | 0.017001908 | 0.025074597 | 0.024878788 | 0.015455454 |
| ENSG00000119487 | 0.030146174 | 0.032766973 | 0.030526798 | 0.027096066 |
| ENSG00000131721 | 0.015639701 | 0.02517677  | 0.024768369 | 0.016867167 |
| ENSG00000170454 | 0.017842996 | 0.02799471  | 0.026000069 | 0.019151955 |
| ENSG00000203780 | 0.079797744 | 0.038704516 | 0.026171366 | 0.034017524 |
| ENSG00000148384 | 0.028427183 | 0.033173595 | 0.037368246 | 0.029074048 |
| ENSG00000178568 | 0.013894301 | 0.02419     | 0.024188275 | 0.013884115 |
| ENSG00000203740 | 0.01588983  | 0.02491781  | 0.024427785 | 0.016704301 |
| ENSG00000157103 | 0.017069921 | 0.027120106 | 0.027613769 | 0.01681192  |
| ENSG00000156194 | 0.015545743 | 0.024821857 | 0.024054771 | 0.015891534 |
| ENSG00000112541 | 0.019684264 | 0.027950216 | 0.027444728 | 0.018313982 |
| ENSG00000167103 | 0.016550042 | 0.025716315 | 0.024667921 | 0.01624241  |
| ENSG00000141485 | 0.016899937 | 0.025297136 | 0.025395437 | 0.015870356 |

|                 |             |             |             |             |
|-----------------|-------------|-------------|-------------|-------------|
| ENSG0000034063  | 0.052160168 | 0.046051787 | 0.038948565 | 0.04837451  |
| ENSG00000185085 | 0.024533988 | 0.030960416 | 0.039517952 | 0.027589147 |
| ENSG00000075213 | 0.052111968 | 0.025940078 | 0.026441319 | 0.016399041 |
| ENSG0000030419  | 0.054144186 | 0.046299274 | 0.053404257 | 0.049029886 |
| ENSG00000113810 | 0.039402606 | 0.040664778 | 0.03475864  | 0.031722644 |
| ENSG00000110777 | 0.030062573 | 0.030023055 | 0.031139316 | 0.025332307 |
| ENSG00000100567 | 0.025630471 | 0.031562686 | 0.028561111 | 0.024392754 |
| ENSG00000151304 | 0.032529871 | 0.034285109 | 0.034837632 | 0.028484958 |
| ENSG00000144909 | 0.03243851  | 0.039042123 | 0.032874467 | 0.040507352 |
| ENSG00000172410 | 0.015377733 | 0.026425216 | 0.0255041   | 0.015571089 |
| ENSG00000143321 | 0.023696525 | 0.027290416 | 0.028424238 | 0.021971064 |
| ENSG00000005889 | 0.024043131 | 0.027486503 | 0.029284828 | 0.021032636 |
| ENSG00000143995 | 0.015993231 | 0.024526369 | 0.024649392 | 0.015367613 |
| ENSG00000117009 | 0.058016588 | 0.054810839 | 0.049540833 | 0.052684317 |
| ENSG00000169813 | 0.043272671 | 0.036326021 | 0.036188865 | 0.03678132  |
| ENSG00000196715 | 0.03602286  | 0.038103357 | 0.035986751 | 0.027872665 |
| ENSG00000119718 | 0.027348481 | 0.034081124 | 0.03331091  | 0.024612382 |
| ENSG00000102738 | 0.033992882 | 0.033788944 | 0.031718848 | 0.024174768 |
| ENSG00000132603 | 0.034952213 | 0.042565336 | 0.047274985 | 0.042810833 |
| ENSG00000077238 | 0.040002682 | 0.047062788 | 0.044852585 | 0.038715116 |
| ENSG00000164756 | 0.015790684 | 0.025654536 | 0.026930409 | 0.019530378 |
| ENSG00000064652 | 0.044273832 | 0.040860127 | 0.031806325 | 0.034518958 |
| ENSG00000155621 | 0.028889538 | 0.033042649 | 0.035897916 | 0.034533772 |
| ENSG00000163501 | 0.015988532 | 0.024676639 | 0.024633922 | 0.016454322 |
| ENSG00000087008 | 0.037420542 | 0.039505284 | 0.044350981 | 0.027892639 |
| ENSG00000013810 | 0.042177865 | 0.033797968 | 0.044734147 | 0.038791012 |
| ENSG00000036473 | 0.014149385 | 0.024033667 | 0.0247401   | 0.015632082 |
| ENSG00000160224 | 0.021468561 | 0.027275637 | 0.026096623 | 0.021636217 |
| ENSG00000104228 | 0.017477158 | 0.024819206 | 0.026489791 | 0.016819382 |
| ENSG00000105137 | 0.016613949 | 0.025001252 | 0.025449975 | 0.015061064 |
| ENSG00000101856 | 0.041215096 | 0.038900329 | 0.033962933 | 0.034083925 |
| ENSG00000064886 | 0.157930161 | 0.096659094 | 0.08225214  | 0.127999829 |
| ENSG00000089053 | 0.022008742 | 0.027204106 | 0.027744882 | 0.020825102 |
| ENSG00000082074 | 0.069047028 | 0.04039197  | 0.037619675 | 0.029403911 |
| ENSG00000186579 | 0.016359781 | 0.025415374 | 0.025632207 | 0.01657449  |
| ENSG00000179941 | 0.033263271 | 0.036961837 | 0.03131281  | 0.025163379 |
| ENSG00000166848 | 0.018718833 | 0.027104836 | 0.028822717 | 0.018503297 |
| ENSG00000145242 | 0.016410846 | 0.024880734 | 0.024852584 | 0.017040101 |
| ENSG00000162244 | 0.016568667 | 0.024236873 | 0.024877615 | 0.016536757 |
| ENSG00000168209 | 0.053868233 | 0.051831567 | 0.069845632 | 0.051181925 |
| ENSG00000132781 | 0.039253877 | 0.039186194 | 0.036741517 | 0.033266223 |
| ENSG00000198960 | 0.022865786 | 0.028059648 | 0.030309576 | 0.020861157 |
| ENSG00000168930 | 0.01634173  | 0.024405561 | 0.025027548 | 0.015780143 |
| ENSG00000124440 | 0.016467785 | 0.02477827  | 0.025590519 | 0.013850498 |
| ENSG00000166012 | 0.043955836 | 0.037714883 | 0.043311713 | 0.035362215 |
| ENSG00000139180 | 0.025067303 | 0.030577227 | 0.029440279 | 0.021845461 |
| ENSG00000121310 | 0.057022196 | 0.06524464  | 0.056447812 | 0.036859998 |
| ENSG00000172150 | 0.017366784 | 0.026530452 | 0.024903701 | 0.016249808 |
| ENSG00000168827 | 0.033197248 | 0.034083569 | 0.032050197 | 0.031463515 |
| ENSG00000124067 | 0.048003112 | 0.043155129 | 0.040197287 | 0.038004827 |
| ENSG00000170486 | 0.022014481 | 0.029830993 | 0.029650709 | 0.018933087 |
| ENSG00000164466 | 0.03354338  | 0.032759851 | 0.030488857 | 0.026526667 |
| ENSG00000161217 | 0.029119849 | 0.034770748 | 0.029325109 | 0.027549025 |
| ENSG00000197728 | 0.034094271 | 0.039686774 | 0.039861068 | 0.023926125 |

|                 |             |             |             |             |
|-----------------|-------------|-------------|-------------|-------------|
| ENSG00000105357 | 0.015585597 | 0.025988163 | 0.025588997 | 0.015192599 |
| ENSG00000165392 | 0.031369176 | 0.034745972 | 0.033747384 | 0.030762663 |
| ENSG00000146574 | 0.022403383 | 0.030681788 | 0.030005481 | 0.024161572 |
| ENSG00000172023 | 0.014894814 | 0.024209515 | 0.024824917 | 0.014965863 |
| ENSG00000113763 | 0.015267931 | 0.025938036 | 0.024250855 | 0.015493675 |
| ENSG00000165899 | 0.017088399 | 0.024529088 | 0.025945638 | 0.016099734 |
| ENSG00000130038 | 0.016383445 | 0.025199502 | 0.026431544 | 0.016056164 |
| ENSG00000174775 | 0.035339134 | 0.031020774 | 0.034692661 | 0.029260049 |
| ENSG00000170613 | 0.016168559 | 0.026654784 | 0.02516107  | 0.016799851 |
| ENSG00000139793 | 0.053521893 | 0.043587999 | 0.041941879 | 0.038555583 |
| ENSG00000146856 | 0.018068834 | 0.025342826 | 0.025456919 | 0.018104292 |
| ENSG00000127954 | 0.014772683 | 0.025310476 | 0.024419456 | 0.014983249 |
| ENSG00000169891 | 0.022614529 | 0.032979903 | 0.024153316 | 0.01793531  |
| ENSG00000185164 | 0.025290224 | 0.030610208 | 0.031612774 | 0.026978361 |
| ENSG00000160678 | 0.016552376 | 0.026491885 | 0.028078503 | 0.017785366 |
| ENSG00000080572 | 0.027301538 | 0.030332875 | 0.031734969 | 0.02501476  |
| ENSG00000058335 | 0.016835798 | 0.025028793 | 0.024860559 | 0.015791784 |
| ENSG00000131470 | 0.039751167 | 0.038250326 | 0.030830288 | 0.026828366 |
| ENSG00000138385 | 0.026407488 | 0.02926502  | 0.027685957 | 0.022782923 |
| ENSG00000112378 | 0.130314328 | 0.092065286 | 0.065319681 | 0.084674577 |
| ENSG00000129933 | 0.024699158 | 0.032929129 | 0.031623924 | 0.023651883 |
| ENSG00000136448 | 0.032546482 | 0.034430992 | 0.033448166 | 0.033734278 |
| ENSG00000174460 | 0.015532114 | 0.025648741 | 0.026695836 | 0.016787991 |
| ENSG00000197045 | 0.026753116 | 0.032049241 | 0.035560122 | 0.03284758  |
| ENSG00000168260 | 0.015658262 | 0.025447583 | 0.024659265 | 0.015594071 |
| ENSG00000110063 | 0.027859114 | 0.029634314 | 0.029156921 | 0.02405941  |
| ENSG00000077348 | 0.033169707 | 0.033170346 | 0.030752776 | 0.027933359 |
| ENSG00000147394 | 0.074209478 | 0.057314836 | 0.075350328 | 0.055527668 |
| ENSG00000135823 | 0.026305206 | 0.031420659 | 0.030612025 | 0.027685693 |
| ENSG00000163904 | 0.028289911 | 0.035253642 | 0.034727922 | 0.026966608 |
| ENSG00000063177 | 0.014648653 | 0.023691445 | 0.024181838 | 0.016281137 |
| ENSG00000181090 | 0.044302084 | 0.048564541 | 0.04304183  | 0.038749931 |
| ENSG00000184860 | 0.032411676 | 0.029589201 | 0.031890215 | 0.023870633 |
| ENSG00000078795 | 0.017642115 | 0.024397656 | 0.025256048 | 0.014956014 |
| ENSG00000143621 | 0.020496222 | 0.027829513 | 0.028841157 | 0.021496862 |
| ENSG00000196415 | 0.016109322 | 0.024734033 | 0.025383057 | 0.016662431 |
| ENSG00000113319 | 0.018916809 | 0.025549291 | 0.027912034 | 0.018195348 |
| ENSG00000198794 | 0.045119716 | 0.040305188 | 0.042325753 | 0.06620909  |
| ENSG00000183246 | 0.058996983 | 0.075151245 | 0.052504188 | 0.065098357 |
| ENSG00000170293 | 0.016507084 | 0.024972216 | 0.024992651 | 0.023414196 |
| ENSG00000167178 | 0.026273132 | 0.027339424 | 0.02651436  | 0.018450838 |
| ENSG00000186847 | 0.021847655 | 0.028050798 | 0.026617298 | 0.017351983 |
| ENSG00000155660 | 0.045191712 | 0.043512219 | 0.042972005 | 0.048064188 |
| ENSG00000147509 | 0.025041268 | 0.024720219 | 0.024238967 | 0.023774628 |
| ENSG00000242732 | 0.015605396 | 0.024736021 | 0.025794044 | 0.014880744 |
| ENSG00000112818 | 0.016774427 | 0.024989841 | 0.024588431 | 0.01570852  |
| ENSG00000163714 | 0.039627303 | 0.039969446 | 0.039355817 | 0.034111658 |
| ENSG00000160307 | 0.01574176  | 0.024154064 | 0.024793596 | 0.015685344 |
| ENSG00000107672 | 0.028048311 | 0.030988511 | 0.028625002 | 0.024372796 |
| ENSG00000198492 | 0.024070542 | 0.034950139 | 0.03873997  | 0.026228558 |
| ENSG00000124225 | 0.018094503 | 0.02528774  | 0.025307356 | 0.016736877 |
| ENSG00000133313 | 0.024276972 | 0.038211258 | 0.036357332 | 0.027101785 |
| ENSG00000143110 | 0.104212552 | 0.056235308 | 0.054565158 | 0.07863519  |
| ENSG00000166266 | 0.019671582 | 0.027294077 | 0.027263232 | 0.018112098 |

|                 |             |             |             |             |
|-----------------|-------------|-------------|-------------|-------------|
| ENSG00000136011 | 0.016700131 | 0.025722081 | 0.02492418  | 0.017285193 |
| ENSG00000101945 | 0.034297722 | 0.028451722 | 0.040628061 | 0.034693872 |
| ENSG00000100031 | 0.01531603  | 0.02614035  | 0.024226113 | 0.01484349  |
| ENSG00000007952 | 0.015765775 | 0.025524096 | 0.024599769 | 0.014448997 |
| ENSG00000104885 | 0.029813361 | 0.037339626 | 0.042603068 | 0.031973809 |
| ENSG00000119523 | 0.024613995 | 0.034255722 | 0.037030053 | 0.02351581  |
| ENSG00000106258 | 0.017410528 | 0.025016791 | 0.025915181 | 0.014906924 |
| ENSG00000108947 | 0.015245883 | 0.02473995  | 0.024817593 | 0.01452777  |
| ENSG00000130595 | 0.050984857 | 0.059153482 | 0.057080934 | 0.072092028 |
| ENSG00000126814 | 0.030948743 | 0.034110081 | 0.03330513  | 0.025643059 |
| ENSG00000051108 | 0.045868946 | 0.046903162 | 0.048820531 | 0.042409264 |
| ENSG00000138119 | 0.027640722 | 0.025510359 | 0.024984473 | 0.015569243 |
| ENSG00000132507 | 0.03593735  | 0.039054636 | 0.039073766 | 0.040380358 |
| ENSG00000144136 | 0.030321377 | 0.039126693 | 0.034297694 | 0.029679656 |
| ENSG00000134318 | 0.039365316 | 0.03453776  | 0.035590538 | 0.029040454 |
| ENSG00000102021 | 0.021147229 | 0.025892484 | 0.025904868 | 0.016342025 |
| ENSG00000076864 | 0.058874109 | 0.055151376 | 0.063532894 | 0.057471373 |
| ENSG00000106018 | 0.016745359 | 0.025839844 | 0.025710442 | 0.016020388 |
| ENSG00000250067 | 0.019019915 | 0.026126723 | 0.024927235 | 0.017329098 |
| ENSG00000175449 | 0.039720893 | 0.037233493 | 0.032905083 | 0.031129817 |
| ENSG00000069966 | 0.01717973  | 0.025155512 | 0.02454596  | 0.016665393 |
| ENSG00000179029 | 0.029196691 | 0.045715291 | 0.032629447 | 0.039179231 |
| ENSG00000129009 | 0.016148673 | 0.02624698  | 0.025563592 | 0.016263818 |
| ENSG00000168242 | 0.057859004 | 0.045788969 | 0.064763663 | 0.061074947 |
| ENSG00000131791 | 0.017403357 | 0.026488482 | 0.026703322 | 0.015858733 |
| ENSG00000169507 | 0.018077479 | 0.024447045 | 0.02554986  | 0.017145461 |
| ENSG00000119328 | 0.027722526 | 0.036659766 | 0.032905158 | 0.024022924 |
| ENSG00000105063 | 0.029147697 | 0.032551991 | 0.032245347 | 0.02807426  |
| ENSG00000128708 | 0.027683339 | 0.031717121 | 0.028079334 | 0.031220426 |
| ENSG00000090447 | 0.018211482 | 0.025744538 | 0.025816763 | 0.015552557 |
| ENSG00000115221 | 0.016054097 | 0.02617347  | 0.025300124 | 0.016125285 |
| ENSG00000135953 | 0.016709027 | 0.024689685 | 0.025800675 | 0.016594864 |
| ENSG00000006606 | 0.01575391  | 0.025154198 | 0.024734069 | 0.015158617 |
| ENSG00000121058 | 0.027142828 | 0.032029471 | 0.03173263  | 0.022574537 |
| ENSG00000157778 | 0.02760788  | 0.031111369 | 0.033732899 | 0.028027711 |
| ENSG00000167771 | 0.015318032 | 0.024963817 | 0.024125568 | 0.015069687 |
| ENSG00000159648 | 0.014876639 | 0.024611837 | 0.024869274 | 0.014630786 |
| ENSG00000152284 | 0.016613183 | 0.024519129 | 0.025096373 | 0.016195733 |
| ENSG00000163029 | 0.036335469 | 0.04061581  | 0.03552898  | 0.029426094 |
| ENSG00000105371 | 0.016903122 | 0.025912667 | 0.026518825 | 0.016183667 |
| ENSG00000121964 | 0.01683849  | 0.025834274 | 0.024192228 | 0.015740834 |
| ENSG00000137261 | 0.018837103 | 0.025813345 | 0.026960336 | 0.017445069 |
| ENSG00000197321 | 0.017944087 | 0.026302732 | 0.025072715 | 0.016930091 |
| ENSG00000009954 | 0.025903122 | 0.032641393 | 0.031930961 | 0.025282703 |
| ENSG00000083937 | 0.033404109 | 0.039206543 | 0.034872834 | 0.031916458 |
| ENSG00000185666 | 0.01604756  | 0.024913997 | 0.024451472 | 0.016572841 |
| ENSG00000183346 | 0.015834883 | 0.025397268 | 0.025138201 | 0.014967463 |
| ENSG00000018610 | 0.032941461 | 0.032805621 | 0.03422191  | 0.029496611 |
| ENSG00000168491 | 0.056450931 | 0.05496603  | 0.048477379 | 0.050911227 |
| ENSG00000138629 | 0.034958705 | 0.036691009 | 0.03287826  | 0.033615324 |
| ENSG00000131051 | 0.040898969 | 0.044941994 | 0.039244119 | 0.064263004 |
| ENSG00000107951 | 0.036893936 | 0.031577483 | 0.038275799 | 0.02885434  |
| ENSG00000128989 | 0.028043563 | 0.033304444 | 0.030421037 | 0.022750513 |
| ENSG00000119421 | 0.031618792 | 0.033893054 | 0.032870554 | 0.024824584 |

|                 |             |             |             |             |
|-----------------|-------------|-------------|-------------|-------------|
| ENSG00000140093 | 0.01552153  | 0.025182862 | 0.024500631 | 0.014818213 |
| ENSG00000171587 | 0.016305057 | 0.025701455 | 0.025268804 | 0.015589366 |
| ENSG00000184465 | 0.020339337 | 0.031378389 | 0.027494968 | 0.022226683 |
| ENSG00000159733 | 0.016769059 | 0.025101465 | 0.023984972 | 0.016419889 |
| ENSG00000165304 | 0.043124299 | 0.042359528 | 0.032532498 | 0.036840134 |
| ENSG00000115020 | 0.01627574  | 0.025472435 | 0.024165077 | 0.017685363 |
| ENSG00000218823 | 0.015663933 | 0.024822971 | 0.025060303 | 0.015263498 |
| ENSG00000168398 | 0.016723594 | 0.025029809 | 0.025294966 | 0.014777019 |
| ENSG00000151465 | 0.028760639 | 0.033027497 | 0.031544993 | 0.026524059 |
| ENSG00000162928 | 0.026725238 | 0.033913148 | 0.040299703 | 0.020733951 |
| ENSG00000054267 | 0.027102836 | 0.033770806 | 0.03442225  | 0.026787437 |
| ENSG00000169299 | 0.033170834 | 0.041715874 | 0.033783347 | 0.028798036 |
| ENSG00000077498 | 0.015029583 | 0.025070301 | 0.024480046 | 0.015853625 |
| ENSG00000204519 | 0.028121793 | 0.044431875 | 0.04704824  | 0.030673199 |
| ENSG00000058272 | 0.032804525 | 0.04492765  | 0.03845482  | 0.049583503 |
| ENSG00000135862 | 0.06123733  | 0.05347829  | 0.046959685 | 0.043467182 |
| ENSG00000163637 | 0.059900556 | 0.035848611 | 0.028960546 | 0.031765353 |
| ENSG00000135414 | 0.020006349 | 0.028565168 | 0.030682744 | 0.019668313 |
| ENSG00000068793 | 0.031769184 | 0.040491115 | 0.036545382 | 0.033717857 |
| ENSG00000008382 | 0.028952543 | 0.029315118 | 0.031309137 | 0.025337217 |
| ENSG00000119938 | 0.033128846 | 0.033719975 | 0.039415523 | 0.02768806  |
| ENSG00000160349 | 0.016020997 | 0.025137173 | 0.024723367 | 0.014909901 |
| ENSG00000204632 | 0.039399771 | 0.048496043 | 0.042184265 | 0.053462199 |
| ENSG00000148187 | 0.034541321 | 0.037755344 | 0.034568769 | 0.030464046 |
| ENSG00000102241 | 0.034548874 | 0.036728269 | 0.032764145 | 0.026524365 |
| ENSG00000108469 | 0.022395117 | 0.02963015  | 0.029110155 | 0.026579506 |
| ENSG00000165689 | 0.039199799 | 0.040402414 | 0.036204925 | 0.030112063 |
| ENSG00000118777 | 0.015810939 | 0.025345298 | 0.024337665 | 0.014911788 |
| ENSG00000172572 | 0.018074263 | 0.025564293 | 0.024878143 | 0.017333029 |
| ENSG00000177156 | 0.023893844 | 0.030799244 | 0.027451056 | 0.021337983 |
| ENSG00000115592 | 0.014176829 | 0.025837674 | 0.026526073 | 0.014496346 |
| ENSG00000164708 | 0.016705034 | 0.024931788 | 0.025430633 | 0.017975321 |
| ENSG00000129158 | 0.028242627 | 0.029207954 | 0.030492947 | 0.029925613 |
| ENSG00000128564 | 0.016185764 | 0.025544443 | 0.024672278 | 0.01504669  |
| ENSG00000103241 | 0.015583459 | 0.025767775 | 0.024682471 | 0.01560344  |
| ENSG00000162402 | 0.017487839 | 0.025284172 | 0.02760847  | 0.016486697 |
| ENSG00000183780 | 0.077192931 | 0.070041547 | 0.040067691 | 0.046685684 |
| ENSG00000112118 | 0.032329224 | 0.032456204 | 0.030177581 | 0.026149363 |
| ENSG00000177380 | 0.017500761 | 0.02604714  | 0.025541543 | 0.016764038 |
| ENSG00000120158 | 0.035747214 | 0.036709501 | 0.041722593 | 0.037263021 |
| ENSG00000134905 | 0.033032567 | 0.036467922 | 0.03496244  | 0.02947855  |
| ENSG00000105499 | 0.100792232 | 0.095002079 | 0.081746414 | 0.072830079 |
| ENSG00000198258 | 0.018224142 | 0.027455013 | 0.025334453 | 0.016874952 |
| ENSG00000070759 | 0.040168309 | 0.035928704 | 0.038005134 | 0.035382158 |
| ENSG00000134152 | 0.037579362 | 0.036880666 | 0.038999484 | 0.031552153 |
| ENSG00000206181 | 0.019115068 | 0.028692951 | 0.026638875 | 0.017961086 |
| ENSG00000198798 | 0.016823971 | 0.027162738 | 0.026274874 | 0.01703367  |
| ENSG00000166825 | 0.017862561 | 0.029939278 | 0.025495555 | 0.034541597 |
| ENSG00000183323 | 0.024540455 | 0.033800631 | 0.028864896 | 0.023177609 |
| ENSG00000197587 | 0.016034609 | 0.025409176 | 0.024318708 | 0.015508036 |
| ENSG00000105483 | 0.044901873 | 0.048369497 | 0.037388143 | 0.032120784 |
| ENSG00000139154 | 0.037487425 | 0.039893849 | 0.03308241  | 0.028396891 |
| ENSG00000095932 | 0.023736522 | 0.031133827 | 0.02723522  | 0.025030551 |
| ENSG00000039560 | 0.096180221 | 0.110599276 | 0.04038661  | 0.068640008 |

|                 |             |             |             |             |
|-----------------|-------------|-------------|-------------|-------------|
| ENSG00000102572 | 0.024160408 | 0.031089103 | 0.029285308 | 0.020719097 |
| ENSG00000197562 | 0.032192381 | 0.037384507 | 0.033668476 | 0.027774646 |
| ENSG00000011258 | 0.026547297 | 0.02944552  | 0.032183606 | 0.026571154 |
| ENSG00000165131 | 0.015373818 | 0.025191323 | 0.024700805 | 0.015977869 |
| ENSG00000136944 | 0.016666199 | 0.025776149 | 0.025317133 | 0.016507546 |
| ENSG00000121570 | 0.017819275 | 0.02578158  | 0.025199059 | 0.01691238  |
| ENSG00000156384 | 0.023978612 | 0.02975406  | 0.026126191 | 0.023526787 |
| ENSG00000170262 | 0.015684839 | 0.025446355 | 0.025368618 | 0.014775824 |
| ENSG00000188060 | 0.0788725   | 0.073333148 | 0.050714444 | 0.067700939 |
| ENSG00000163848 | 0.024667952 | 0.029819611 | 0.031480663 | 0.022548512 |
| ENSG00000187855 | 0.015944817 | 0.025842682 | 0.024849999 | 0.016833631 |
| ENSG00000174982 | 0.015778996 | 0.025184948 | 0.024893816 | 0.014561481 |
| ENSG00000204217 | 0.031424256 | 0.033820164 | 0.036841894 | 0.031823176 |
| ENSG00000178645 | 0.016178509 | 0.024990428 | 0.024312976 | 0.015280113 |
| ENSG00000125995 | 0.022353605 | 0.025838857 | 0.025697215 | 0.01918263  |
| ENSG00000141979 | 0.015159527 | 0.025169807 | 0.024838608 | 0.015160721 |
| ENSG00000177189 | 0.033724111 | 0.044713427 | 0.034653347 | 0.031051827 |
| ENSG00000125414 | 0.019532055 | 0.030219114 | 0.027163105 | 0.018682708 |
| ENSG00000174898 | 0.015070283 | 0.025022302 | 0.025089037 | 0.016107216 |
| ENSG00000154478 | 0.015471199 | 0.025688927 | 0.024775943 | 0.015888179 |
| ENSG00000106038 | 0.01560964  | 0.02562541  | 0.026085814 | 0.016139063 |
| ENSG00000139405 | 0.022240137 | 0.028999882 | 0.02935127  | 0.02414476  |
| ENSG00000113360 | 0.028834946 | 0.034094214 | 0.029182456 | 0.020464135 |
| ENSG00000248405 | 0.016334497 | 0.024926138 | 0.025015984 | 0.014706482 |
| ENSG00000138074 | 0.043663684 | 0.04237461  | 0.038943304 | 0.046542703 |
| ENSG00000223953 | 0.016719797 | 0.025903644 | 0.024557308 | 0.016224805 |
| ENSG00000196459 | 0.027157416 | 0.03217189  | 0.034447753 | 0.026447063 |
| ENSG00000135336 | 0.029841426 | 0.035153221 | 0.029569879 | 0.026498258 |
| ENSG00000156509 | 0.053001589 | 0.044099879 | 0.039254664 | 0.041456655 |
| ENSG00000150510 | 0.016373432 | 0.027667612 | 0.026614521 | 0.0154512   |
| ENSG00000039650 | 0.029050243 | 0.031393778 | 0.028024277 | 0.026895213 |
| ENSG00000172456 | 0.050248954 | 0.043632417 | 0.033188466 | 0.037564118 |
| ENSG00000180304 | 0.030566328 | 0.03330924  | 0.031475616 | 0.02495932  |
| ENSG00000134369 | 0.030070386 | 0.028845921 | 0.031620306 | 0.026742071 |
| ENSG00000185608 | 0.024981822 | 0.031323927 | 0.033163979 | 0.020462607 |
| ENSG00000123700 | 0.102790097 | 0.058578504 | 0.026925895 | 0.016128557 |
| ENSG00000138801 | 0.038035403 | 0.040568189 | 0.036305155 | 0.027704985 |
| ENSG00000178425 | 0.035854672 | 0.033099569 | 0.033793177 | 0.024792959 |
| ENSG00000107829 | 0.022104794 | 0.029309305 | 0.029877159 | 0.021684437 |
| ENSG00000213741 | 0.017571708 | 0.025050283 | 0.0246774   | 0.018014004 |
| ENSG00000130283 | 0.016862691 | 0.02548497  | 0.024838033 | 0.016605065 |
| ENSG00000115263 | 0.015999096 | 0.027708866 | 0.025735789 | 0.017461626 |
| ENSG00000128891 | 0.030679573 | 0.031858898 | 0.034431414 | 0.025404744 |
| ENSG00000116996 | 0.022886694 | 0.02499801  | 0.02477605  | 0.015593821 |
| ENSG00000184659 | 0.014740415 | 0.026028296 | 0.024562796 | 0.014683658 |
| ENSG00000082641 | 0.026244878 | 0.030486636 | 0.033161583 | 0.029130161 |
| ENSG00000111981 | 0.016730533 | 0.02573291  | 0.025222261 | 0.015364396 |
| ENSG00000186732 | 0.015855177 | 0.025687908 | 0.024848324 | 0.015977171 |
| ENSG00000166796 | 0.024996788 | 0.025828729 | 0.026889205 | 0.020756655 |
| ENSG00000069869 | 0.016533579 | 0.024404434 | 0.024339124 | 0.018190388 |
| ENSG00000166068 | 0.091053439 | 0.076280059 | 0.072507352 | 0.087960268 |
| ENSG00000172678 | 0.016216242 | 0.024697592 | 0.025395508 | 0.015920606 |
| ENSG00000174718 | 0.036456897 | 0.040750477 | 0.037516112 | 0.034312281 |
| ENSG00000177614 | 0.017441761 | 0.027197021 | 0.025646493 | 0.017256296 |

|                 |             |             |             |             |
|-----------------|-------------|-------------|-------------|-------------|
| ENSG0000090266  | 0.024531416 | 0.032940917 | 0.029618098 | 0.030241682 |
| ENSG00000112473 | 0.032092434 | 0.036778732 | 0.043520588 | 0.036772538 |
| ENSG00000131773 | 0.076831065 | 0.027779281 | 0.025393847 | 0.024897012 |
| ENSG00000167371 | 0.021090275 | 0.02704985  | 0.028561227 | 0.018682657 |
| ENSG00000204348 | 0.035691123 | 0.027808188 | 0.028471552 | 0.023059377 |
| ENSG00000128607 | 0.037695351 | 0.049072606 | 0.046094657 | 0.039601546 |
| ENSG00000104093 | 0.035990674 | 0.03476969  | 0.032715636 | 0.025713487 |
| ENSG00000115649 | 0.02892723  | 0.035109214 | 0.034172014 | 0.031070444 |
| ENSG00000197343 | 0.025616327 | 0.036772183 | 0.035244724 | 0.02947197  |
| ENSG00000077984 | 0.021017305 | 0.038628623 | 0.035606318 | 0.056566567 |
| ENSG00000087245 | 0.017757825 | 0.025798278 | 0.025112079 | 0.015339764 |
| ENSG00000133318 | 0.027662035 | 0.030395012 | 0.029772845 | 0.023025205 |
| ENSG00000198815 | 0.023400114 | 0.03043612  | 0.032442269 | 0.024623259 |
| ENSG00000114857 | 0.036313629 | 0.038457923 | 0.034175508 | 0.031438753 |
| ENSG00000132424 | 0.02427086  | 0.031957816 | 0.030049538 | 0.022107694 |
| ENSG00000136541 | 0.027339638 | 0.035856644 | 0.034846625 | 0.023587785 |
| ENSG00000101216 | 0.025613156 | 0.037323867 | 0.038019025 | 0.023776691 |
| ENSG00000129862 | 0.026671835 | 0.02500639  | 0.025839766 | 0.018889434 |
| ENSG00000182899 | 0.014288266 | 0.023892859 | 0.024339323 | 0.014752049 |
| ENSG00000139644 | 0.019679534 | 0.02847038  | 0.03024008  | 0.018710725 |
| ENSG00000152684 | 0.032438209 | 0.03096755  | 0.033807503 | 0.026066862 |
| ENSG00000164093 | 0.016535135 | 0.025864178 | 0.02441266  | 0.016023796 |
| ENSG00000157423 | 0.017732305 | 0.025159645 | 0.025458531 | 0.015720705 |
| ENSG00000134007 | 0.018406845 | 0.026287031 | 0.025017148 | 0.015603023 |
| ENSG00000163081 | 0.017267659 | 0.025503702 | 0.02574849  | 0.016301705 |
| ENSG00000204965 | 0.01832874  | 0.025247504 | 0.026246389 | 0.01884406  |
| ENSG00000203877 | 0.015708559 | 0.024667893 | 0.024412859 | 0.014550974 |
| ENSG00000163810 | 0.017244662 | 0.025944812 | 0.025361383 | 0.018363311 |
| ENSG00000108244 | 0.019990242 | 0.027557385 | 0.025756192 | 0.018942981 |
| ENSG00000123545 | 0.033452888 | 0.035277841 | 0.033344294 | 0.028671886 |
| ENSG00000148824 | 0.019575425 | 0.027841556 | 0.02618915  | 0.018032215 |
| ENSG00000122304 | 0.016373323 | 0.025105571 | 0.025480454 | 0.015298637 |
| ENSG00000167941 | 0.020662275 | 0.030112815 | 0.027269202 | 0.022959945 |
| ENSG00000087302 | 0.018680554 | 0.026521353 | 0.026094319 | 0.019197346 |
| ENSG00000132016 | 0.015453829 | 0.024761552 | 0.025232312 | 0.014681023 |
| ENSG00000082805 | 0.016986543 | 0.025799527 | 0.024368426 | 0.015982793 |
| ENSG00000187833 | 0.021837385 | 0.025454894 | 0.024756419 | 0.015580808 |
| ENSG00000107077 | 0.029837619 | 0.037175598 | 0.030602933 | 0.025672965 |
| ENSG00000213190 | 0.062138605 | 0.042903822 | 0.046686563 | 0.056898316 |
| ENSG00000165322 | 0.033294989 | 0.036060163 | 0.03695222  | 0.033904645 |
| ENSG00000123064 | 0.033402633 | 0.030888414 | 0.031060909 | 0.029139478 |
| ENSG00000158856 | 0.018141951 | 0.025402955 | 0.026248369 | 0.016438116 |
| ENSG00000141576 | 0.057440895 | 0.052605726 | 0.050955589 | 0.051553178 |
| ENSG00000170848 | 0.015576446 | 0.025552742 | 0.025452069 | 0.015641393 |
| ENSG00000038358 | 0.03872517  | 0.041844163 | 0.041305383 | 0.02786464  |
| ENSG00000124713 | 0.022967348 | 0.025927353 | 0.026236762 | 0.018243588 |
| ENSG00000168348 | 0.015833607 | 0.02457395  | 0.024421052 | 0.014564029 |
| ENSG00000184515 | 0.058581219 | 0.041965378 | 0.042188239 | 0.048774226 |
| ENSG00000082212 | 0.037387304 | 0.045411426 | 0.035732135 | 0.034861051 |
| ENSG00000148600 | 0.020263193 | 0.028140737 | 0.025655233 | 0.025195193 |
| ENSG00000172671 | 0.042735267 | 0.044357489 | 0.035122931 | 0.033745415 |
| ENSG00000133250 | 0.035356143 | 0.039519071 | 0.044335912 | 0.030762792 |
| ENSG00000182628 | 0.043976045 | 0.043266046 | 0.037569245 | 0.032502443 |
| ENSG00000167014 | 0.016554032 | 0.02594052  | 0.024521273 | 0.016145181 |

|                 |             |             |             |             |
|-----------------|-------------|-------------|-------------|-------------|
| ENSG00000160219 | 0.023671963 | 0.02704627  | 0.026746452 | 0.020334406 |
| ENSG00000116906 | 0.027179485 | 0.033264336 | 0.027789519 | 0.023077258 |
| ENSG00000137103 | 0.037353225 | 0.034045941 | 0.038429941 | 0.034456967 |
| ENSG00000013364 | 0.032499154 | 0.038044025 | 0.034215243 | 0.03213362  |
| ENSG00000231256 | 0.018293298 | 0.025102032 | 0.026380226 | 0.016521893 |
| ENSG00000155100 | 0.025366818 | 0.030905909 | 0.029223124 | 0.020181052 |
| ENSG00000183255 | 0.027825221 | 0.034819505 | 0.035208223 | 0.026419956 |
| ENSG00000198089 | 0.03798031  | 0.042558246 | 0.043757496 | 0.039078599 |
| ENSG00000104450 | 0.029947071 | 0.031738862 | 0.033261121 | 0.033179452 |
| ENSG00000124172 | 0.018031365 | 0.02590002  | 0.025130736 | 0.017486558 |
| ENSG00000133026 | 0.089267161 | 0.068698868 | 0.070079822 | 0.093093553 |
| ENSG00000124134 | 0.016442631 | 0.02499005  | 0.025555593 | 0.015878167 |
| ENSG00000163660 | 0.032807205 | 0.039736047 | 0.041027389 | 0.025094565 |
| ENSG00000110436 | 0.016250424 | 0.02595631  | 0.025113547 | 0.015136195 |
| ENSG00000183941 | 0.058556484 | 0.044699744 | 0.055883903 | 0.058369677 |
| ENSG00000165556 | 0.017251089 | 0.028435612 | 0.027312669 | 0.0170786   |
| ENSG00000197238 | 0.049389473 | 0.05073224  | 0.053055625 | 0.042018477 |
| ENSG00000187492 | 0.015442946 | 0.025154907 | 0.024838188 | 0.014592795 |
| ENSG00000162769 | 0.038387222 | 0.042130777 | 0.032097395 | 0.035426833 |
| ENSG00000160570 | 0.01872799  | 0.026899659 | 0.029333245 | 0.025452963 |
| ENSG00000148773 | 0.048996877 | 0.044849333 | 0.038872862 | 0.036815125 |
| ENSG00000170423 | 0.014775922 | 0.024730372 | 0.024726213 | 0.015150563 |
| ENSG00000140386 | 0.044211275 | 0.04377753  | 0.039462845 | 0.031723505 |
| ENSG00000118702 | 0.017504451 | 0.025849641 | 0.023990512 | 0.01602289  |
| ENSG00000108219 | 0.034308887 | 0.037787243 | 0.032787744 | 0.038374204 |
| ENSG00000176937 | 0.018367407 | 0.026143092 | 0.027065258 | 0.017898127 |
| ENSG00000170464 | 0.021991478 | 0.029469441 | 0.028853754 | 0.022073628 |
| ENSG00000162994 | 0.041156493 | 0.043997137 | 0.038922147 | 0.030168477 |
| ENSG00000111726 | 0.028709921 | 0.036548081 | 0.03128425  | 0.021308907 |
| ENSG00000131864 | 0.016812064 | 0.024955269 | 0.024883363 | 0.01508094  |
| ENSG00000163517 | 0.02019685  | 0.026175552 | 0.026484828 | 0.0175413   |
| ENSG00000178878 | 0.057627179 | 0.056716482 | 0.059470171 | 0.066585975 |
| ENSG00000111229 | 0.018238925 | 0.02673265  | 0.026408092 | 0.024139427 |
| ENSG00000135409 | 0.017071221 | 0.025457219 | 0.024543368 | 0.016188757 |
| ENSG00000198783 | 0.027240478 | 0.032713813 | 0.032730122 | 0.024739646 |
| ENSG00000146049 | 0.017299288 | 0.024587542 | 0.024540107 | 0.013984278 |
| ENSG00000244482 | 0.018210897 | 0.025727245 | 0.025698067 | 0.01773869  |
| ENSG00000141551 | 0.023950609 | 0.031498466 | 0.035769857 | 0.031086025 |
| ENSG00000138375 | 0.028839439 | 0.03541664  | 0.033514889 | 0.026699722 |
| ENSG00000130201 | 0.016566247 | 0.025180298 | 0.025070949 | 0.01538234  |
| ENSG00000163393 | 0.021834321 | 0.024633994 | 0.02553356  | 0.017919919 |
| ENSG00000143337 | 0.025360945 | 0.034821951 | 0.035572938 | 0.022579727 |
| ENSG00000121314 | 0.018786688 | 0.027946992 | 0.025945746 | 0.016095602 |
| ENSG00000106341 | 0.01662578  | 0.024475584 | 0.028064303 | 0.017151282 |
| ENSG00000186591 | 0.022463301 | 0.029891628 | 0.032422634 | 0.022057178 |
| ENSG00000213366 | 0.071682778 | 0.066322245 | 0.068796064 | 0.064641918 |
| ENSG00000143498 | 0.030373495 | 0.036452266 | 0.028568741 | 0.023713731 |
| ENSG00000145321 | 0.016093538 | 0.024981588 | 0.024704399 | 0.015791087 |
| ENSG00000163510 | 0.027625125 | 0.031339033 | 0.034631772 | 0.029652057 |
| ENSG00000153130 | 0.029256808 | 0.035519756 | 0.030176783 | 0.025569931 |
| ENSG00000129245 | 0.02247856  | 0.028046334 | 0.028152442 | 0.027201521 |
| ENSG00000198743 | 0.028256672 | 0.033069686 | 0.032852149 | 0.036147552 |
| ENSG00000183770 | 0.025902731 | 0.027181249 | 0.029581713 | 0.025025147 |
| ENSG00000109689 | 0.026925047 | 0.030486768 | 0.029812879 | 0.021833032 |



|                 |             |             |             |             |
|-----------------|-------------|-------------|-------------|-------------|
| ENSG00000196136 | 0.015076248 | 0.025804371 | 0.025633566 | 0.015360553 |
| ENSG00000163995 | 0.016583696 | 0.026128098 | 0.025709023 | 0.016163402 |
| ENSG00000054118 | 0.030857318 | 0.034688883 | 0.031840802 | 0.030774718 |
| ENSG00000128272 | 0.037166662 | 0.037891591 | 0.036000313 | 0.04130073  |
| ENSG00000063245 | 0.025780129 | 0.037010504 | 0.042428188 | 0.032259344 |
| ENSG00000134954 | 0.038304372 | 0.046213193 | 0.047427182 | 0.045726108 |
| ENSG00000017427 | 0.079695589 | 0.077454711 | 0.049365913 | 0.065761878 |
| ENSG00000187008 | 0.018428769 | 0.025947417 | 0.025904217 | 0.016588178 |
| ENSG00000074695 | 0.046451529 | 0.046854424 | 0.044299466 | 0.044759868 |
| ENSG00000180871 | 0.038794214 | 0.030564519 | 0.031415144 | 0.032099105 |
| ENSG00000055211 | 0.02471604  | 0.031285696 | 0.030367853 | 0.027725464 |
| ENSG00000104237 | 0.016201655 | 0.025063456 | 0.025742503 | 0.015632761 |
| ENSG00000153822 | 0.018632663 | 0.027418371 | 0.026029435 | 0.016981719 |
| ENSG00000197958 | 0.016177409 | 0.025332121 | 0.025641275 | 0.016325734 |
| ENSG00000049192 | 0.031965329 | 0.030396781 | 0.02627459  | 0.025271313 |
| ENSG00000213799 | 0.027037245 | 0.032780107 | 0.032044186 | 0.031785647 |
| ENSG00000132432 | 0.021922678 | 0.027051049 | 0.027375785 | 0.020378266 |
| ENSG00000086827 | 0.035710741 | 0.038798155 | 0.034013136 | 0.029264192 |
| ENSG00000184897 | 0.040664333 | 0.042168714 | 0.040976098 | 0.034481204 |
| ENSG00000115216 | 0.025066335 | 0.031250074 | 0.037490609 | 0.022570341 |
| ENSG00000134824 | 0.039498789 | 0.034802578 | 0.030461747 | 0.033725029 |
| ENSG00000170624 | 0.020029236 | 0.026006727 | 0.025636218 | 0.017380257 |
| ENSG00000166192 | 0.035852117 | 0.038989408 | 0.03279486  | 0.028056654 |
| ENSG00000157211 | 0.015876829 | 0.024267195 | 0.024699639 | 0.016663335 |
| ENSG00000114544 | 0.033684822 | 0.039054813 | 0.037698592 | 0.030659805 |
| ENSG00000244067 | 0.016663923 | 0.027425954 | 0.027802501 | 0.01754468  |
| ENSG00000167705 | 0.02055186  | 0.02855069  | 0.027033863 | 0.020681394 |
| ENSG00000114166 | 0.019589856 | 0.028231436 | 0.025233194 | 0.017294427 |
| ENSG00000112992 | 0.018471239 | 0.027028276 | 0.026784117 | 0.018513339 |
| ENSG00000119138 | 0.062239223 | 0.041204918 | 0.041402774 | 0.044324875 |
| ENSG00000158481 | 0.044476782 | 0.041450463 | 0.055132594 | 0.066978977 |
| ENSG00000167332 | 0.016327994 | 0.024622601 | 0.025522547 | 0.016624941 |
| ENSG00000139597 | 0.040198483 | 0.036685318 | 0.043627866 | 0.04170415  |
| ENSG00000196357 | 0.019237891 | 0.026923353 | 0.027615296 | 0.01543807  |
| ENSG00000138080 | 0.105111906 | 0.099944593 | 0.092999601 | 0.11662332  |
| ENSG00000106333 | 0.030627008 | 0.036879815 | 0.028399743 | 0.027666112 |
| ENSG00000151364 | 0.112662008 | 0.10987413  | 0.118040367 | 0.077781621 |
| ENSG00000159086 | 0.02841636  | 0.034762418 | 0.037950397 | 0.025956496 |
| ENSG00000131127 | 0.038382689 | 0.039557159 | 0.033602119 | 0.034761239 |
| ENSG00000174996 | 0.036147336 | 0.035144656 | 0.0352395   | 0.036536972 |
| ENSG00000163631 | 0.018116383 | 0.024734517 | 0.025193038 | 0.015949857 |
| ENSG00000126822 | 0.015774766 | 0.025462912 | 0.025691272 | 0.015578166 |
| ENSG00000198125 | 0.018740456 | 0.024962853 | 0.025766643 | 0.017364832 |
| ENSG00000171533 | 0.01662516  | 0.026174833 | 0.024394991 | 0.015280814 |
| ENSG00000239402 | 0.018256222 | 0.025653517 | 0.025649719 | 0.018108092 |
| ENSG00000177946 | 0.032695399 | 0.038060428 | 0.037674697 | 0.030625894 |
| ENSG00000174928 | 0.02084072  | 0.026919344 | 0.026459391 | 0.01668919  |
| ENSG00000101294 | 0.032722615 | 0.03845706  | 0.041983692 | 0.038474021 |
| ENSG00000164187 | 0.025401028 | 0.032425888 | 0.030398308 | 0.025091864 |
| ENSG00000154553 | 0.057230661 | 0.044797181 | 0.03378614  | 0.024443292 |
| ENSG00000136492 | 0.026563177 | 0.033579829 | 0.02947952  | 0.034059582 |
| ENSG00000069702 | 0.116374857 | 0.083140983 | 0.07580353  | 0.088641497 |
| ENSG00000169139 | 0.023880442 | 0.03144424  | 0.029035834 | 0.022065659 |
| ENSG00000171017 | 0.01829224  | 0.02927509  | 0.027313259 | 0.017253681 |

|                 |             |             |             |             |
|-----------------|-------------|-------------|-------------|-------------|
| ENSG00000154518 | 0.018959545 | 0.025784889 | 0.025410815 | 0.016843867 |
| ENSG00000110321 | 0.019439088 | 0.02883852  | 0.028529645 | 0.021945607 |
| ENSG00000178562 | 0.059233491 | 0.067528801 | 0.064214643 | 0.060505796 |
| ENSG00000074603 | 0.025356958 | 0.034537409 | 0.034419477 | 0.024336773 |
| ENSG00000100276 | 0.019237897 | 0.026398672 | 0.026018848 | 0.015420345 |
| ENSG00000132518 | 0.016982429 | 0.025550346 | 0.025215896 | 0.015071487 |
| ENSG00000006118 | 0.038469879 | 0.045634008 | 0.040851717 | 0.043613739 |
| ENSG00000134852 | 0.028477552 | 0.034809321 | 0.031361452 | 0.024164139 |
| ENSG00000189091 | 0.031362459 | 0.036341953 | 0.030727421 | 0.023928309 |
| ENSG00000137502 | 0.066111945 | 0.059521439 | 0.061430694 | 0.048705477 |
| ENSG00000106268 | 0.033818568 | 0.03017867  | 0.034189483 | 0.034338626 |
| ENSG00000129757 | 0.029441705 | 0.037408875 | 0.029970644 | 0.0325932   |
| ENSG00000184702 | 0.062867456 | 0.049208074 | 0.05054683  | 0.048597527 |
| ENSG00000143297 | 0.099426355 | 0.065729059 | 0.077216659 | 0.100605213 |
| ENSG00000137960 | 0.018670614 | 0.026910469 | 0.024948823 | 0.018953617 |
| ENSG00000087266 | 0.033066178 | 0.036118245 | 0.034255254 | 0.03036999  |
| ENSG00000152104 | 0.028056236 | 0.026269906 | 0.024692319 | 0.016922231 |
| ENSG00000136267 | 0.01478573  | 0.025310306 | 0.0243714   | 0.015017305 |
| ENSG00000176890 | 0.030542191 | 0.032580648 | 0.028019278 | 0.024907648 |
| ENSG00000196867 | 0.021987225 | 0.025754962 | 0.026299052 | 0.017788083 |
| ENSG00000183779 | 0.024837552 | 0.02945697  | 0.026334899 | 0.021076457 |
| ENSG00000099203 | 0.02610971  | 0.029483042 | 0.033821456 | 0.021539577 |
| ENSG00000044459 | 0.025153428 | 0.031326607 | 0.030318154 | 0.02021485  |
| ENSG00000169605 | 0.016362377 | 0.024707873 | 0.025567052 | 0.014972359 |
| ENSG00000124232 | 0.018507508 | 0.026384138 | 0.027046829 | 0.016954044 |
| ENSG00000120696 | 0.040121362 | 0.042917462 | 0.030929518 | 0.0264013   |
| ENSG00000079102 | 0.016817732 | 0.024717017 | 0.025232869 | 0.017722835 |
| ENSG00000237541 | 0.282420222 | 0.264067524 | 0.265088455 | 0.200045966 |
| ENSG00000197102 | 0.027515143 | 0.041694036 | 0.035026443 | 0.029420868 |
| ENSG00000170899 | 0.069695868 | 0.04609917  | 0.046916151 | 0.061916596 |
| ENSG00000123576 | 0.014995411 | 0.024625695 | 0.024093271 | 0.014208627 |
| ENSG00000177105 | 0.025380064 | 0.030902091 | 0.033552083 | 0.027369351 |
| ENSG00000169136 | 0.061555534 | 0.056194775 | 0.05131311  | 0.062038518 |
| ENSG00000166793 | 0.038650805 | 0.045948833 | 0.041082207 | 0.050380296 |
| ENSG00000092098 | 0.023568928 | 0.031260411 | 0.03745544  | 0.02321251  |
| ENSG00000134901 | 0.038991963 | 0.035294345 | 0.034538226 | 0.033833742 |
| ENSG00000118997 | 0.026512722 | 0.024831616 | 0.024744136 | 0.020823352 |
| ENSG00000150961 | 0.036658052 | 0.037486335 | 0.036754745 | 0.037558784 |
| ENSG00000186924 | 0.016010094 | 0.025926387 | 0.025304878 | 0.015269742 |
| ENSG00000153767 | 0.033359637 | 0.037675152 | 0.031065729 | 0.029192591 |
| ENSG00000234776 | 0.015633028 | 0.024765851 | 0.025528359 | 0.01636624  |
| ENSG00000165828 | 0.015283376 | 0.025051962 | 0.024043149 | 0.015686368 |
| ENSG00000138031 | 0.038455641 | 0.035896284 | 0.032084535 | 0.02796523  |
| ENSG00000102053 | 0.016908498 | 0.024918561 | 0.025477744 | 0.015063582 |
| ENSG00000166275 | 0.032679528 | 0.0402959   | 0.040791795 | 0.031562025 |
| ENSG00000165972 | 0.016714227 | 0.025057263 | 0.024544792 | 0.014634214 |
| ENSG00000121104 | 0.029638156 | 0.034714524 | 0.038138194 | 0.029274919 |
| ENSG00000149927 | 0.017232822 | 0.027216751 | 0.024942909 | 0.015913393 |
| ENSG00000108963 | 0.022185144 | 0.029461401 | 0.031088218 | 0.018697326 |
| ENSG00000137558 | 0.015547116 | 0.024663377 | 0.024954343 | 0.014873304 |
| ENSG00000184182 | 0.02746138  | 0.036276184 | 0.034438755 | 0.026081023 |
| ENSG00000003147 | 0.070182177 | 0.064011116 | 0.057734692 | 0.102101374 |
| ENSG00000205020 | 0.064307898 | 0.083275906 | 0.073437946 | 0.087197365 |
| ENSG00000136891 | 0.026380289 | 0.030563921 | 0.028154703 | 0.021974131 |

|                 |             |             |             |             |
|-----------------|-------------|-------------|-------------|-------------|
| ENSG00000181585 | 0.015482899 | 0.024683552 | 0.025087954 | 0.013814759 |
| ENSG00000136643 | 0.027239122 | 0.033270385 | 0.032717288 | 0.026073202 |
| ENSG00000106069 | 0.017391276 | 0.024649895 | 0.026015518 | 0.016063908 |
| ENSG00000117298 | 0.049474193 | 0.042498508 | 0.043766194 | 0.041887182 |
| ENSG00000152022 | 0.036390144 | 0.043872928 | 0.03849706  | 0.028530548 |
| ENSG00000169188 | 0.028387735 | 0.034162312 | 0.032492496 | 0.026232162 |
| ENSG00000138892 | 0.018136764 | 0.025073874 | 0.025219957 | 0.016390281 |
| ENSG00000114670 | 0.016171092 | 0.025540875 | 0.024373955 | 0.01537446  |
| ENSG00000153936 | 0.029799099 | 0.032491936 | 0.034445045 | 0.028443064 |
| ENSG00000183389 | 0.016844281 | 0.025946159 | 0.025250957 | 0.017498056 |
| ENSG00000176532 | 0.015325331 | 0.025197742 | 0.025442923 | 0.014391915 |
| ENSG00000196584 | 0.034492762 | 0.033372656 | 0.036000654 | 0.034005457 |
| ENSG00000166866 | 0.020910824 | 0.028053951 | 0.026259609 | 0.018334653 |
| ENSG00000134249 | 0.017405878 | 0.026706989 | 0.026581708 | 0.016430897 |
| ENSG00000095917 | 0.015957973 | 0.025865651 | 0.026434215 | 0.016747175 |
| ENSG00000101546 | 0.028175941 | 0.029360778 | 0.03337836  | 0.025629742 |
| ENSG00000110844 | 0.024565853 | 0.030995155 | 0.025777698 | 0.020535775 |
| ENSG00000140750 | 0.041209152 | 0.043180655 | 0.040969374 | 0.037821405 |
| ENSG00000162999 | 0.028823017 | 0.031846636 | 0.03229995  | 0.026662457 |
| ENSG00000070718 | 0.052014166 | 0.050409068 | 0.04327088  | 0.044653705 |
| ENSG00000183313 | 0.014910223 | 0.024069025 | 0.024635277 | 0.015339536 |
| ENSG00000112576 | 0.054676694 | 0.050478299 | 0.04224659  | 0.050541763 |
| ENSG00000125869 | 0.15897682  | 0.142694502 | 0.129409108 | 0.135118063 |
| ENSG00000173567 | 0.017970536 | 0.025101859 | 0.026146455 | 0.015607098 |
| ENSG00000108878 | 0.016040446 | 0.023961362 | 0.02401639  | 0.015926872 |
| ENSG00000184724 | 0.01603841  | 0.024974701 | 0.024551529 | 0.015325455 |
| ENSG00000053900 | 0.034889018 | 0.040553741 | 0.033708958 | 0.025106348 |
| ENSG00000188997 | 0.037414391 | 0.028605    | 0.031074864 | 0.023392261 |
| ENSG00000127366 | 0.015000605 | 0.02439243  | 0.025936426 | 0.015759194 |
| ENSG00000188581 | 0.014685881 | 0.025074252 | 0.02525357  | 0.014109484 |
| ENSG00000122678 | 0.024276268 | 0.028638977 | 0.030913244 | 0.023694806 |
| ENSG00000185049 | 0.024710621 | 0.032297886 | 0.033825929 | 0.023662548 |
| ENSG00000005893 | 0.031175157 | 0.032984563 | 0.030679844 | 0.028965832 |
| ENSG00000143001 | 0.015801717 | 0.024805264 | 0.02436075  | 0.015103953 |
| ENSG00000124459 | 0.02757646  | 0.038123148 | 0.038594376 | 0.027221147 |
| ENSG00000092847 | 0.03180559  | 0.034057106 | 0.02913507  | 0.027800301 |
| ENSG00000159479 | 0.023681904 | 0.02961002  | 0.030186667 | 0.02428472  |
| ENSG00000102977 | 0.033828701 | 0.039299369 | 0.033937997 | 0.028783634 |
| ENSG00000118640 | 0.023506997 | 0.028024207 | 0.031175036 | 0.023102786 |
| ENSG00000178235 | 0.017127244 | 0.026134783 | 0.025580048 | 0.017972238 |
| ENSG00000092969 | 0.015899802 | 0.025342338 | 0.026000571 | 0.015385065 |
| ENSG00000159708 | 0.020640344 | 0.025156736 | 0.025669637 | 0.021357751 |
| ENSG00000108946 | 0.020007436 | 0.030251933 | 0.028487322 | 0.017757888 |
| ENSG00000043039 | 0.01843634  | 0.024167908 | 0.02427548  | 0.016771276 |
| ENSG00000183900 | 0.031771427 | 0.032258387 | 0.028891946 | 0.032330926 |
| ENSG00000111837 | 0.018314908 | 0.029252392 | 0.025743415 | 0.018617794 |
| ENSG00000128534 | 0.033935836 | 0.040525511 | 0.034418445 | 0.029864947 |
| ENSG00000126264 | 0.049581218 | 0.04930171  | 0.04415664  | 0.040680794 |
| ENSG00000171097 | 0.032702343 | 0.036551845 | 0.035505923 | 0.03123195  |
| ENSG00000139973 | 0.015613511 | 0.024942298 | 0.023881811 | 0.015737063 |
| ENSG00000176678 | 0.015742742 | 0.024734914 | 0.02423733  | 0.015404481 |
| ENSG00000104804 | 0.051902306 | 0.046228103 | 0.038728516 | 0.043892865 |
| ENSG00000186462 | 0.04531214  | 0.03446968  | 0.040290661 | 0.025102631 |
| ENSG00000162517 | 0.023889251 | 0.028836841 | 0.028596747 | 0.023617437 |

|                 |             |             |             |             |
|-----------------|-------------|-------------|-------------|-------------|
| ENSG00000130176 | 0.015592929 | 0.026268416 | 0.025383393 | 0.016431083 |
| ENSG00000008282 | 0.026177241 | 0.029511743 | 0.029936753 | 0.023051119 |
| ENSG00000100325 | 0.023883994 | 0.03298599  | 0.030167498 | 0.021685571 |
| ENSG00000198670 | 0.03009087  | 0.026321531 | 0.025366706 | 0.018667133 |
| ENSG00000089818 | 0.024951345 | 0.032881353 | 0.037356602 | 0.024530649 |
| ENSG00000070748 | 0.015599715 | 0.024969182 | 0.024082456 | 0.015537127 |
| ENSG00000137727 | 0.039765416 | 0.048028921 | 0.032994381 | 0.049849871 |
| ENSG00000162188 | 0.017278822 | 0.024709078 | 0.02486785  | 0.017801816 |
| ENSG00000119004 | 0.037686328 | 0.037773927 | 0.043822094 | 0.04998138  |
| ENSG00000160131 | 0.029185924 | 0.033206267 | 0.03219782  | 0.028510369 |
| ENSG00000206561 | 0.016359333 | 0.025773812 | 0.025340618 | 0.015028861 |
| ENSG00000213694 | 0.015427802 | 0.026627171 | 0.02562898  | 0.016222714 |
| ENSG00000185813 | 0.036892016 | 0.043342941 | 0.033378921 | 0.030825172 |
| ENSG00000124496 | 0.015875958 | 0.025614264 | 0.02430632  | 0.014916729 |
| ENSG00000176396 | 0.029704988 | 0.036659105 | 0.038290277 | 0.023716414 |
| ENSG00000184900 | 0.032545407 | 0.033544268 | 0.032642817 | 0.029188816 |
| ENSG00000122223 | 0.088889458 | 0.087834521 | 0.097683191 | 0.104586674 |
| ENSG00000099256 | 0.034004284 | 0.030259556 | 0.026059087 | 0.023083365 |
| ENSG00000102010 | 0.01588868  | 0.02477336  | 0.025293239 | 0.015669617 |
| ENSG00000173653 | 0.030101336 | 0.034343483 | 0.045858753 | 0.031855865 |
| ENSG00000205542 | 0.015695813 | 0.024116616 | 0.023681363 | 0.016607755 |
| ENSG00000133858 | 0.023616619 | 0.032049838 | 0.029223324 | 0.021330341 |
| ENSG00000131183 | 0.01467679  | 0.024144848 | 0.024471961 | 0.014670151 |
| ENSG00000154144 | 0.031843806 | 0.030018753 | 0.033703036 | 0.030923825 |
| ENSG00000185551 | 0.207136143 | 0.173838398 | 0.139732355 | 0.161551406 |
| ENSG00000169288 | 0.029507978 | 0.034491126 | 0.035051994 | 0.028690133 |
| ENSG00000101292 | 0.015946135 | 0.024941616 | 0.024502927 | 0.01496218  |
| ENSG00000156273 | 0.045222273 | 0.050522432 | 0.043681828 | 0.036308137 |
| ENSG00000197157 | 0.023413184 | 0.026677388 | 0.029344196 | 0.021025154 |
| ENSG00000151553 | 0.032833052 | 0.034630617 | 0.033266161 | 0.030699619 |
| ENSG00000167207 | 0.047696782 | 0.039277865 | 0.038450355 | 0.04174355  |
| ENSG00000101040 | 0.027806291 | 0.036203176 | 0.030972158 | 0.022511202 |
| ENSG00000197442 | 0.037379325 | 0.042063184 | 0.0347054   | 0.031305537 |
| ENSG00000170006 | 0.056722113 | 0.048297432 | 0.041531347 | 0.037726023 |
| ENSG00000188822 | 0.029206295 | 0.02910163  | 0.027645659 | 0.023163355 |
| ENSG00000130520 | 0.031487613 | 0.032157564 | 0.031861595 | 0.026559289 |
| ENSG00000185090 | 0.104061115 | 0.076164916 | 0.070163555 | 0.060665935 |
| ENSG00000147130 | 0.019608654 | 0.026686157 | 0.029220402 | 0.020075926 |
| ENSG00000198736 | 0.046182666 | 0.046593852 | 0.034752014 | 0.038515869 |
| ENSG00000126458 | 0.040193271 | 0.035818313 | 0.034444557 | 0.042369168 |
| ENSG00000136111 | 0.090481323 | 0.097636879 | 0.098935827 | 0.081924132 |
| ENSG00000147402 | 0.018571355 | 0.024985813 | 0.02526812  | 0.016157542 |
| ENSG00000188735 | 0.022454087 | 0.029432923 | 0.03045131  | 0.02881825  |
| ENSG00000155970 | 0.017305081 | 0.025360976 | 0.025363787 | 0.016136823 |
| ENSG00000118096 | 0.03024829  | 0.032936671 | 0.030143286 | 0.031917912 |
| ENSG00000155307 | 0.065501917 | 0.051046528 | 0.057767021 | 0.054248061 |
| ENSG00000182287 | 0.035862391 | 0.035076898 | 0.033459357 | 0.031261286 |
| ENSG00000137965 | 0.049757581 | 0.04111067  | 0.036126251 | 0.038126389 |
| ENSG00000165934 | 0.027023145 | 0.031990012 | 0.031937539 | 0.027484547 |
| ENSG00000102970 | 0.12644928  | 0.102716229 | 0.100241686 | 0.114426458 |
| ENSG00000128045 | 0.016248116 | 0.02475442  | 0.025771659 | 0.015041527 |
| ENSG00000125912 | 0.026871923 | 0.032350452 | 0.034564817 | 0.027081592 |
| ENSG00000050748 | 0.029307389 | 0.035088582 | 0.032144323 | 0.022929104 |
| ENSG00000169877 | 0.019610383 | 0.025123437 | 0.025411968 | 0.076192946 |

|                 |             |             |             |             |
|-----------------|-------------|-------------|-------------|-------------|
| ENSG00000198586 | 0.027846706 | 0.030631652 | 0.033070514 | 0.027084533 |
| ENSG00000160318 | 0.033657992 | 0.035341278 | 0.033469556 | 0.032591631 |
| ENSG00000196187 | 0.05218025  | 0.052344874 | 0.043854951 | 0.041952746 |
| ENSG00000137252 | 0.015728168 | 0.024764165 | 0.024516078 | 0.015662061 |
| ENSG00000168658 | 0.01478133  | 0.024788538 | 0.02464435  | 0.015059777 |
| ENSG00000131059 | 0.016976612 | 0.024689326 | 0.02424048  | 0.016178816 |
| ENSG00000164929 | 0.016616349 | 0.024818387 | 0.025209308 | 0.016802341 |
| ENSG00000153048 | 0.046163349 | 0.038886842 | 0.033964481 | 0.026396752 |
| ENSG00000116726 | 0.03074638  | 0.027411476 | 0.031320899 | 0.019393379 |
| ENSG00000170290 | 0.017585035 | 0.026293863 | 0.0246057   | 0.018372985 |
| ENSG00000172361 | 0.016311983 | 0.025317772 | 0.024720488 | 0.016808943 |
| ENSG00000162576 | 0.016521132 | 0.027261707 | 0.025595443 | 0.016364185 |
| ENSG00000181609 | 0.017821377 | 0.025864337 | 0.025498608 | 0.01828588  |
| ENSG00000135773 | 0.01651326  | 0.025066844 | 0.025316427 | 0.015999005 |
| ENSG00000154016 | 0.026337705 | 0.029199734 | 0.032722818 | 0.027532144 |
| ENSG00000122254 | 0.016092962 | 0.025392612 | 0.024141331 | 0.015769851 |
| ENSG00000150637 | 0.0456058   | 0.043287439 | 0.035108282 | 0.046886751 |
| ENSG00000151812 | 0.016875626 | 0.025045101 | 0.024267762 | 0.014664284 |
| ENSG00000105880 | 0.014964899 | 0.024452981 | 0.025025991 | 0.015162924 |
| ENSG00000177042 | 0.028974605 | 0.034255453 | 0.032527307 | 0.031755963 |
| ENSG00000143774 | 0.020887272 | 0.027227235 | 0.028420703 | 0.016922241 |
| ENSG00000170759 | 0.037634264 | 0.040105847 | 0.039792074 | 0.032572199 |
| ENSG00000188124 | 0.022638557 | 0.02744736  | 0.031257334 | 0.019106937 |
| ENSG00000173432 | 0.017890432 | 0.029398588 | 0.02595043  | 0.019589807 |
| ENSG00000185245 | 0.037505355 | 0.031472014 | 0.031272075 | 0.026477772 |
| ENSG00000179820 | 0.066455299 | 0.048067501 | 0.048531886 | 0.047702739 |
| ENSG00000188786 | 0.023563981 | 0.038881539 | 0.036788278 | 0.026779727 |
| ENSG00000221818 | 0.019384952 | 0.025415002 | 0.027468219 | 0.016716874 |
| ENSG00000182325 | 0.030892193 | 0.032379341 | 0.035385736 | 0.030258342 |
| ENSG00000189292 | 0.016060989 | 0.025783685 | 0.025923083 | 0.015240696 |
| ENSG00000137767 | 0.026426034 | 0.031601681 | 0.032328463 | 0.021175411 |
| ENSG00000171786 | 0.018094212 | 0.024964864 | 0.025313078 | 0.016181985 |
| ENSG00000158714 | 0.025990988 | 0.025212718 | 0.026361379 | 0.030549065 |
| ENSG00000133106 | 0.042677505 | 0.034724816 | 0.035204882 | 0.031022182 |
| ENSG00000131467 | 0.035241025 | 0.032396777 | 0.03889539  | 0.043907299 |
| ENSG00000196092 | 0.01474455  | 0.025430114 | 0.024419404 | 0.015487561 |
| ENSG00000124275 | 0.016749146 | 0.025016036 | 0.025967146 | 0.016903572 |
| ENSG00000100931 | 0.027463989 | 0.030639996 | 0.031854792 | 0.024765708 |
| ENSG00000158966 | 0.014759095 | 0.025510552 | 0.024215106 | 0.014579066 |
| ENSG00000149133 | 0.014796091 | 0.023992812 | 0.024500975 | 0.014776549 |
| ENSG00000105953 | 0.030346833 | 0.032774384 | 0.030505089 | 0.029593712 |
| ENSG00000165055 | 0.0315001   | 0.031703501 | 0.032307757 | 0.027098176 |
| ENSG00000084676 | 0.038541311 | 0.037920334 | 0.036934336 | 0.036436463 |
| ENSG00000169972 | 0.027561    | 0.030007939 | 0.033935764 | 0.024227296 |
| ENSG00000049883 | 0.031440111 | 0.033727645 | 0.030862078 | 0.022759969 |
| ENSG00000197982 | 0.028980489 | 0.033349814 | 0.031799419 | 0.028558752 |
| ENSG00000166477 | 0.030200352 | 0.035641542 | 0.030710298 | 0.023247618 |
| ENSG00000145198 | 0.016168114 | 0.025166803 | 0.025047847 | 0.016294333 |
| ENSG00000181513 | 0.018926712 | 0.026697452 | 0.027798763 | 0.020849351 |
| ENSG00000101349 | 0.017048782 | 0.025424734 | 0.025193301 | 0.01496905  |
| ENSG00000176754 | 0.015845182 | 0.025125321 | 0.02467699  | 0.014615063 |
| ENSG00000067225 | 0.016305557 | 0.024721657 | 0.025275945 | 0.015328198 |
| ENSG00000102178 | 0.02616562  | 0.042348598 | 0.03164485  | 0.038821772 |
| ENSG00000120685 | 0.028616301 | 0.033910781 | 0.038284161 | 0.033947238 |

|                 |             |             |             |             |
|-----------------|-------------|-------------|-------------|-------------|
| ENSG00000138028 | 0.018814476 | 0.026000019 | 0.025682738 | 0.016556855 |
| ENSG00000166685 | 0.020826794 | 0.02709082  | 0.030955997 | 0.019559135 |
| ENSG00000164023 | 0.031790432 | 0.034516352 | 0.036412868 | 0.030066014 |
| ENSG00000101353 | 0.033242916 | 0.032377184 | 0.033715184 | 0.023674317 |
| ENSG00000149646 | 0.024103398 | 0.02739008  | 0.027702168 | 0.016279523 |
| ENSG00000175764 | 0.016395768 | 0.025630749 | 0.025554762 | 0.016097517 |
| ENSG00000165300 | 0.023371926 | 0.025297586 | 0.026466678 | 0.01567747  |
| ENSG00000129744 | 0.015359318 | 0.024210174 | 0.025028475 | 0.014831962 |
| ENSG00000103269 | 0.029853161 | 0.036190004 | 0.037455034 | 0.024263283 |
| ENSG00000167744 | 0.016421332 | 0.023814036 | 0.024233097 | 0.015366319 |
| ENSG00000141404 | 0.014856705 | 0.024476266 | 0.024083376 | 0.016304371 |
| ENSG00000118260 | 0.029594059 | 0.031790515 | 0.032706183 | 0.025807799 |
| ENSG00000171492 | 0.040422408 | 0.039160923 | 0.036282445 | 0.031785937 |
| ENSG00000037965 | 0.015506693 | 0.02494213  | 0.024506198 | 0.014582065 |
| ENSG00000164576 | 0.029414999 | 0.032064263 | 0.03145821  | 0.026344245 |
| ENSG00000221826 | 0.018553175 | 0.025884147 | 0.025373784 | 0.017995763 |
| ENSG00000203737 | 0.017127493 | 0.026435633 | 0.026012337 | 0.017570386 |
| ENSG00000114631 | 0.042889289 | 0.040752097 | 0.034341881 | 0.035155746 |
| ENSG00000147872 | 0.048828647 | 0.038538827 | 0.039576672 | 0.043395736 |
| ENSG00000113356 | 0.034703496 | 0.034853743 | 0.033739063 | 0.031967295 |
| ENSG00000188883 | 0.019453615 | 0.024828296 | 0.024753376 | 0.017596228 |
| ENSG00000112357 | 0.033080494 | 0.038785667 | 0.030511477 | 0.029355232 |
| ENSG00000164967 | 0.019414621 | 0.028485048 | 0.026675235 | 0.023113936 |
| ENSG00000143036 | 0.017110171 | 0.024731307 | 0.025803581 | 0.0161906   |
| ENSG00000172380 | 0.041393449 | 0.04154168  | 0.026794585 | 0.032266178 |
| ENSG00000105131 | 0.016063576 | 0.025015188 | 0.024458623 | 0.014615338 |
| ENSG00000185246 | 0.028440754 | 0.032265632 | 0.029821775 | 0.025177832 |
| ENSG00000167359 | 0.017342563 | 0.026023774 | 0.025587885 | 0.015818297 |
| ENSG00000099957 | 0.015830162 | 0.025906529 | 0.024975395 | 0.014779972 |
| ENSG00000138152 | 0.017915805 | 0.031350253 | 0.029831581 | 0.02054282  |
| ENSG00000105717 | 0.064339185 | 0.060800154 | 0.046653044 | 0.055117373 |
| ENSG00000120798 | 0.03202922  | 0.033231891 | 0.03051581  | 0.031146934 |
| ENSG00000203908 | 0.027876507 | 0.028360073 | 0.028503528 | 0.022230517 |
| ENSG00000144895 | 0.022530329 | 0.02835733  | 0.029232321 | 0.025557583 |
| ENSG00000103365 | 0.02746063  | 0.041125833 | 0.031494671 | 0.02738309  |
| ENSG00000121270 | 0.018217655 | 0.026533264 | 0.029379688 | 0.017811526 |
| ENSG00000091583 | 0.016217328 | 0.025442055 | 0.0255961   | 0.015812073 |
| ENSG00000084092 | 0.021361658 | 0.028633255 | 0.028108813 | 0.020747037 |
| ENSG00000213923 | 0.017125058 | 0.025344941 | 0.026960362 | 0.01631692  |
| ENSG00000183833 | 0.019239206 | 0.024787067 | 0.025317154 | 0.015538277 |
| ENSG00000141458 | 0.040699785 | 0.041425296 | 0.037446868 | 0.036287857 |
| ENSG00000186716 | 0.017948916 | 0.027130869 | 0.026540515 | 0.018088151 |
| ENSG00000165915 | 0.022649217 | 0.029977486 | 0.031673963 | 0.023907617 |
| ENSG00000185821 | 0.016384465 | 0.025377004 | 0.024447033 | 0.015297354 |
| ENSG00000150783 | 0.015708836 | 0.025333425 | 0.02552056  | 0.014925241 |
| ENSG00000085117 | 0.040169951 | 0.044052523 | 0.044665584 | 0.047528506 |
| ENSG00000172987 | 0.018727488 | 0.026477877 | 0.025090848 | 0.018510829 |
| ENSG00000064995 | 0.022634019 | 0.030241793 | 0.031700211 | 0.018747662 |
| ENSG00000108883 | 0.016740516 | 0.025689179 | 0.026740409 | 0.015988045 |
| ENSG00000086758 | 0.038639295 | 0.051389796 | 0.035295259 | 0.03431607  |
| ENSG00000175329 | 0.12619317  | 0.068121518 | 0.083309238 | 0.111268674 |
| ENSG00000155026 | 0.017644746 | 0.027650372 | 0.026768016 | 0.017034502 |
| ENSG00000140538 | 0.015482025 | 0.025108946 | 0.025016875 | 0.01579047  |
| ENSG00000140262 | 0.035573685 | 0.047821161 | 0.038705047 | 0.038418113 |

|                 |             |             |             |             |
|-----------------|-------------|-------------|-------------|-------------|
| ENSG00000171944 | 0.015512699 | 0.024751961 | 0.024903222 | 0.015438349 |
| ENSG00000157869 | 0.033568168 | 0.034764108 | 0.031765546 | 0.025767427 |
| ENSG00000110080 | 0.027729496 | 0.036888574 | 0.030214808 | 0.024624378 |
| ENSG00000188687 | 0.015441278 | 0.024425817 | 0.024647161 | 0.015074358 |
| ENSG00000123395 | 0.03272891  | 0.040945491 | 0.050753689 | 0.034750353 |
| ENSG00000171877 | 0.014944934 | 0.025918898 | 0.02486895  | 0.015077038 |
| ENSG00000170049 | 0.018478711 | 0.028117741 | 0.025960597 | 0.019018067 |
| ENSG00000162819 | 0.020503354 | 0.030906974 | 0.027770008 | 0.021352726 |
| ENSG00000250589 | 0.015339111 | 0.024897224 | 0.025135285 | 0.014495935 |
| ENSG00000206538 | 0.017343204 | 0.024734593 | 0.026513352 | 0.016552422 |
| ENSG00000047849 | 0.031706001 | 0.058599708 | 0.034961663 | 0.056128575 |
| ENSG00000169758 | 0.024434895 | 0.024909965 | 0.024164663 | 0.017561951 |
| ENSG00000132004 | 0.032019589 | 0.034378694 | 0.034364347 | 0.025942387 |
| ENSG00000145107 | 0.017620426 | 0.024901231 | 0.027275121 | 0.023977091 |
| ENSG00000166333 | 0.029225528 | 0.033355141 | 0.031268761 | 0.022421377 |
| ENSG00000143554 | 0.05296639  | 0.057241308 | 0.046708496 | 0.051959977 |
| ENSG00000147166 | 0.019505285 | 0.029052288 | 0.026072605 | 0.018555186 |
| ENSG00000184674 | 0.137923293 | 0.181139182 | 0.14981277  | 0.159648661 |
| ENSG00000143013 | 0.051578855 | 0.047283222 | 0.040826632 | 0.041419737 |
| ENSG00000101204 | 0.016258255 | 0.025167383 | 0.025865806 | 0.016060177 |
| ENSG00000129103 | 0.032945549 | 0.033066825 | 0.034322606 | 0.033353421 |
| ENSG00000022976 | 0.034269845 | 0.03861817  | 0.035822439 | 0.029082415 |
| ENSG00000143368 | 0.030335362 | 0.039867287 | 0.044261547 | 0.046996417 |
| ENSG00000170891 | 0.022873396 | 0.024418895 | 0.024004377 | 0.01553168  |
| ENSG00000206503 | 0.109155518 | 0.096839957 | 0.175658572 | 0.119251699 |
| ENSG00000187166 | 0.015132072 | 0.025078973 | 0.024648156 | 0.014043441 |
| ENSG00000079931 | 0.15976078  | 0.095504837 | 0.065737688 | 0.129224907 |
| ENSG00000012211 | 0.017937357 | 0.027150622 | 0.025260177 | 0.01753003  |
| ENSG00000198467 | 0.080924166 | 0.069601286 | 0.061395308 | 0.070183634 |
| ENSG00000057593 | 0.016375653 | 0.02518151  | 0.024722183 | 0.016696986 |
| ENSG00000166008 | 0.01561619  | 0.026112401 | 0.025574301 | 0.015294547 |
| ENSG00000110195 | 0.016036637 | 0.024646988 | 0.024538455 | 0.015115765 |
| ENSG00000184908 | 0.015489212 | 0.025132867 | 0.026056565 | 0.01564281  |
| ENSG00000148832 | 0.031263772 | 0.034343525 | 0.029747985 | 0.031308406 |
| ENSG00000158748 | 0.018208409 | 0.025696341 | 0.027649208 | 0.017682802 |
| ENSG00000167114 | 0.016889691 | 0.025740103 | 0.024889665 | 0.01602357  |
| ENSG00000108091 | 0.03608415  | 0.038575592 | 0.038228472 | 0.03265682  |
| ENSG00000167645 | 0.035165985 | 0.034691455 | 0.032031591 | 0.029600903 |
| ENSG00000162144 | 0.062673394 | 0.04890003  | 0.045007807 | 0.050178902 |
| ENSG00000148225 | 0.018149583 | 0.025569344 | 0.025788117 | 0.017974886 |
| ENSG00000171503 | 0.028989715 | 0.036032056 | 0.0295256   | 0.023710439 |
| ENSG00000134160 | 0.015160273 | 0.024742572 | 0.024842956 | 0.014857588 |
| ENSG00000149397 | 0.038092056 | 0.036838562 | 0.036993028 | 0.031134387 |
| ENSG00000180720 | 0.015105422 | 0.025877635 | 0.024551583 | 0.015669543 |
| ENSG00000107018 | 0.040922623 | 0.039105518 | 0.030024771 | 0.029810702 |
| ENSG00000185873 | 0.022483949 | 0.025559162 | 0.024713572 | 0.016219921 |
| ENSG00000136717 | 0.073117345 | 0.058363458 | 0.04961558  | 0.055826321 |
| ENSG00000166225 | 0.017026276 | 0.025040906 | 0.025323819 | 0.016907891 |
| ENSG00000172379 | 0.020716672 | 0.02766876  | 0.025935478 | 0.016878355 |
| ENSG00000163606 | 0.021322213 | 0.027300643 | 0.026228225 | 0.017181062 |
| ENSG00000149295 | 0.015395782 | 0.024810875 | 0.025410142 | 0.016082117 |
| ENSG00000138741 | 0.014488817 | 0.024286107 | 0.024454826 | 0.013989463 |
| ENSG00000132680 | 0.03197066  | 0.035103622 | 0.032110107 | 0.028209542 |
| ENSG00000109339 | 0.016243821 | 0.025447317 | 0.024304286 | 0.014436324 |

|                 |             |             |             |             |
|-----------------|-------------|-------------|-------------|-------------|
| ENSG00000100393 | 0.029758665 | 0.033613354 | 0.042874519 | 0.026505259 |
| ENSG00000166833 | 0.019499072 | 0.025955927 | 0.026084809 | 0.018984697 |
| ENSG00000175356 | 0.014845249 | 0.025379025 | 0.024496715 | 0.014763094 |
| ENSG00000145147 | 0.014940996 | 0.024719195 | 0.024763416 | 0.014162137 |
| ENSG00000174842 | 0.019743741 | 0.028202247 | 0.025777774 | 0.031184334 |
| ENSG00000196313 | 0.02296863  | 0.030047222 | 0.029503832 | 0.02094145  |
| ENSG00000140009 | 0.020982166 | 0.028046415 | 0.026132626 | 0.018540145 |
| ENSG00000141582 | 0.017886852 | 0.027395606 | 0.026401848 | 0.018850016 |
| ENSG00000182973 | 0.024498029 | 0.031720872 | 0.030617506 | 0.023085346 |
| ENSG00000152422 | 0.039007797 | 0.036177761 | 0.0329199   | 0.026401093 |
| ENSG00000172301 | 0.043031958 | 0.039721342 | 0.04105628  | 0.033655038 |
| ENSG00000146054 | 0.015821337 | 0.025458418 | 0.024483515 | 0.014927639 |
| ENSG00000066735 | 0.015934913 | 0.025122322 | 0.024544775 | 0.014532632 |
| ENSG00000164344 | 0.01820679  | 0.026426734 | 0.027945085 | 0.016581249 |
| ENSG00000136697 | 0.015256947 | 0.026209037 | 0.023950069 | 0.015684412 |
| ENSG00000154133 | 0.014583448 | 0.024328817 | 0.024242412 | 0.014091496 |
| ENSG00000180475 | 0.015911147 | 0.024813199 | 0.024247591 | 0.013886544 |
| ENSG00000156265 | 0.104272421 | 0.078924847 | 0.059181634 | 0.078627335 |
| ENSG00000122477 | 0.016884903 | 0.025632703 | 0.024710021 | 0.017676072 |
| ENSG00000106536 | 0.01475986  | 0.02476627  | 0.024160321 | 0.01462552  |
| ENSG00000137752 | 0.075161531 | 0.062432545 | 0.053391021 | 0.061752688 |
| ENSG00000101342 | 0.021052401 | 0.028040812 | 0.030234653 | 0.021711382 |
| ENSG00000172354 | 0.028541843 | 0.034663252 | 0.030185375 | 0.022634028 |
| ENSG00000102003 | 0.018061164 | 0.027517243 | 0.026744547 | 0.017487447 |
| ENSG00000167470 | 0.03300406  | 0.039842904 | 0.038351383 | 0.032903803 |
| ENSG00000185905 | 0.034632127 | 0.035642416 | 0.036955548 | 0.030979558 |
| ENSG00000183678 | 0.017771069 | 0.044872288 | 0.025372017 | 0.024135802 |
| ENSG00000163788 | 0.033696042 | 0.03717912  | 0.03636423  | 0.033587498 |
| ENSG00000164828 | 0.03043946  | 0.036436841 | 0.033979132 | 0.026346794 |
| ENSG00000124181 | 0.045565239 | 0.04431741  | 0.043204965 | 0.034865451 |
| ENSG00000109181 | 0.08491492  | 0.074337274 | 0.051422267 | 0.08303128  |
| ENSG00000186660 | 0.027392641 | 0.034809983 | 0.033900755 | 0.026060289 |
| ENSG00000113593 | 0.030778083 | 0.03538299  | 0.032132529 | 0.022323235 |
| ENSG00000141141 | 0.030616192 | 0.035478046 | 0.033651444 | 0.030825813 |
| ENSG00000135473 | 0.043582191 | 0.042576816 | 0.040992488 | 0.047633533 |
| ENSG00000100731 | 0.028901478 | 0.040481014 | 0.037200514 | 0.030968344 |
| ENSG00000184990 | 0.030987717 | 0.030208961 | 0.03155695  | 0.027425564 |
| ENSG00000162086 | 0.034624032 | 0.037975364 | 0.043774353 | 0.038034295 |
| ENSG00000198677 | 0.025290946 | 0.029585121 | 0.030071738 | 0.022327248 |
| ENSG00000185522 | 0.026159718 | 0.037869431 | 0.037244475 | 0.038385476 |
| ENSG00000148572 | 0.025612379 | 0.035078854 | 0.040615179 | 0.023902617 |
| ENSG00000185978 | 0.015482106 | 0.025497561 | 0.023698011 | 0.015611022 |
| ENSG00000146938 | 0.015638907 | 0.024862789 | 0.024615397 | 0.015481379 |
| ENSG00000129474 | 0.016682558 | 0.024214884 | 0.025112406 | 0.015698862 |
| ENSG00000148408 | 0.019076149 | 0.028947975 | 0.029205434 | 0.021717297 |
| ENSG00000114019 | 0.016731102 | 0.024535865 | 0.024916612 | 0.017304026 |
| ENSG00000183715 | 0.014965853 | 0.025440816 | 0.024474749 | 0.014366594 |
| ENSG00000158019 | 0.025321077 | 0.030181961 | 0.030823568 | 0.024873062 |
| ENSG00000184270 | 0.027714246 | 0.024889201 | 0.027795374 | 0.021201878 |
| ENSG00000178971 | 0.033139748 | 0.03564792  | 0.035494205 | 0.029194919 |
| ENSG00000186867 | 0.016108674 | 0.025363059 | 0.024511304 | 0.016793804 |
| ENSG00000170745 | 0.019116234 | 0.025854717 | 0.02660372  | 0.016122722 |
| ENSG00000160808 | 0.017342543 | 0.024402328 | 0.024815479 | 0.016019839 |
| ENSG00000174306 | 0.028303097 | 0.031555588 | 0.029006127 | 0.026696114 |



|                 |             |             |             |             |
|-----------------|-------------|-------------|-------------|-------------|
| ENSG00000157106 | 0.032160864 | 0.037368012 | 0.035647828 | 0.031899158 |
| ENSG00000116731 | 0.030982824 | 0.041209661 | 0.036281992 | 0.032111557 |
| ENSG00000187961 | 0.038103005 | 0.038832191 | 0.039474409 | 0.030751727 |
| ENSG00000087842 | 0.062524708 | 0.042954551 | 0.039630655 | 0.04543245  |
| ENSG00000153786 | 0.024162791 | 0.030022071 | 0.031897946 | 0.030269831 |
| ENSG00000141179 | 0.044650582 | 0.042263436 | 0.048183961 | 0.044954296 |
| ENSG00000104856 | 0.035572499 | 0.043069849 | 0.041441328 | 0.039634525 |
| ENSG00000132535 | 0.019048837 | 0.029450547 | 0.027518744 | 0.021035171 |
| ENSG00000182117 | 0.019534147 | 0.027574684 | 0.028317668 | 0.020572138 |
| ENSG00000125611 | 0.022876348 | 0.028744316 | 0.02863483  | 0.021258714 |
| ENSG00000135424 | 0.017491236 | 0.0248556   | 0.025243275 | 0.015022639 |
| ENSG00000242802 | 0.045679736 | 0.036291777 | 0.033783925 | 0.038133648 |
| ENSG00000139144 | 0.019004013 | 0.025383493 | 0.027456413 | 0.020810719 |
| ENSG00000023191 | 0.030912048 | 0.030507988 | 0.028779196 | 0.024896742 |
| ENSG00000151322 | 0.01573722  | 0.025583838 | 0.024533186 | 0.014741625 |
| ENSG00000158516 | 0.043340963 | 0.027119499 | 0.025312522 | 0.022171841 |
| ENSG00000175155 | 0.015386514 | 0.026868559 | 0.02536195  | 0.016963928 |
| ENSG00000105327 | 0.024995817 | 0.035711157 | 0.033011691 | 0.030705443 |
| ENSG00000188596 | 0.016408489 | 0.025046406 | 0.024278867 | 0.015965863 |
| ENSG00000120217 | 0.040841377 | 0.040832826 | 0.046336838 | 0.041915396 |
| ENSG00000171722 | 0.017402926 | 0.025696321 | 0.025321709 | 0.015910287 |
| ENSG00000112320 | 0.073903333 | 0.051804818 | 0.054485012 | 0.062112614 |
| ENSG00000185985 | 0.018968457 | 0.024892758 | 0.0255355   | 0.016745214 |
| ENSG00000004961 | 0.028762303 | 0.034532992 | 0.033318003 | 0.028893521 |
| ENSG00000137098 | 0.017872063 | 0.026280766 | 0.026671243 | 0.017440024 |
| ENSG00000184886 | 0.044306014 | 0.040952247 | 0.041102575 | 0.048936944 |
| ENSG00000157653 | 0.016200483 | 0.025399744 | 0.024219363 | 0.015954593 |
| ENSG00000156171 | 0.033818745 | 0.039093033 | 0.038509221 | 0.03331666  |
| ENSG00000174358 | 0.015332701 | 0.02557141  | 0.025790573 | 0.014789758 |
| ENSG00000056972 | 0.018826079 | 0.028628761 | 0.028041544 | 0.018762433 |
| ENSG00000153904 | 0.119689811 | 0.052673476 | 0.029941409 | 0.041943281 |
| ENSG00000115677 | 0.016198547 | 0.026211043 | 0.026348933 | 0.016552719 |
| ENSG00000144036 | 0.059739892 | 0.057571355 | 0.038642054 | 0.044264946 |
| ENSG00000221880 | 0.017235952 | 0.024597332 | 0.026145132 | 0.01527371  |
| ENSG00000120519 | 0.015282963 | 0.025076577 | 0.024792183 | 0.016612893 |
| ENSG00000186088 | 0.058210009 | 0.050372026 | 0.042263865 | 0.040389862 |
| ENSG00000141622 | 0.01561155  | 0.024681699 | 0.025595649 | 0.01494477  |
| ENSG00000150676 | 0.017229149 | 0.026623056 | 0.025257129 | 0.017173511 |
| ENSG00000125877 | 0.030453281 | 0.032090123 | 0.032570396 | 0.026570349 |
| ENSG00000105879 | 0.030448779 | 0.045200728 | 0.050650539 | 0.031044332 |
| ENSG00000104870 | 0.076119256 | 0.049968459 | 0.037439788 | 0.0514294   |
| ENSG00000162642 | 0.034627026 | 0.034782687 | 0.031967966 | 0.025980999 |
| ENSG00000101440 | 0.017978797 | 0.025378633 | 0.026445648 | 0.015466455 |
| ENSG00000130119 | 0.031993996 | 0.03265705  | 0.034843541 | 0.03017093  |
| ENSG00000198898 | 0.028630387 | 0.039306633 | 0.031399274 | 0.035431033 |
| ENSG00000160161 | 0.01615238  | 0.025488467 | 0.024887934 | 0.016598547 |
| ENSG00000082397 | 0.08847762  | 0.058582183 | 0.048487478 | 0.128984914 |
| ENSG00000076053 | 0.031675537 | 0.038401625 | 0.035068252 | 0.029206372 |
| ENSG00000078747 | 0.035857849 | 0.035239882 | 0.039380063 | 0.034411332 |
| ENSG00000186174 | 0.018872241 | 0.028681581 | 0.027151789 | 0.020486057 |
| ENSG00000204209 | 0.024553998 | 0.029944529 | 0.034010704 | 0.02578751  |
| ENSG00000100938 | 0.025150495 | 0.027837311 | 0.028113462 | 0.021177694 |
| ENSG00000186854 | 0.036096722 | 0.041822244 | 0.033265194 | 0.026065283 |
| ENSG00000128641 | 0.066555877 | 0.070350995 | 0.045719094 | 0.05873353  |

|                 |             |             |             |             |
|-----------------|-------------|-------------|-------------|-------------|
| ENSG00000151640 | 0.097300902 | 0.080838244 | 0.094211719 | 0.101962583 |
| ENSG00000112511 | 0.04158871  | 0.042667988 | 0.046517544 | 0.047877706 |
| ENSG00000116885 | 0.01598141  | 0.024919406 | 0.025351023 | 0.016092717 |
| ENSG00000109208 | 0.014440718 | 0.024757911 | 0.024367319 | 0.01498757  |
| ENSG00000141198 | 0.067297577 | 0.047207653 | 0.046758043 | 0.048684531 |
| ENSG00000181626 | 0.016642072 | 0.024660976 | 0.024447824 | 0.015344398 |
| ENSG00000166900 | 0.04615051  | 0.054593208 | 0.049200876 | 0.045580533 |
| ENSG00000171189 | 0.016339316 | 0.023897401 | 0.024998731 | 0.015719502 |
| ENSG00000104827 | 0.016877468 | 0.024774986 | 0.025054285 | 0.01513201  |
| ENSG00000105771 | 0.024929575 | 0.032094498 | 0.031601354 | 0.028142802 |
| ENSG00000163673 | 0.015224176 | 0.025331598 | 0.025211615 | 0.013895025 |
| ENSG00000101981 | 0.01726497  | 0.02401622  | 0.024355797 | 0.016195619 |
| ENSG00000113196 | 0.02314356  | 0.026470828 | 0.024889644 | 0.02218443  |
| ENSG00000118922 | 0.062684148 | 0.053428565 | 0.05413084  | 0.047462109 |
| ENSG00000132670 | 0.015806335 | 0.024563044 | 0.025465722 | 0.016452279 |
| ENSG00000198821 | 0.030556798 | 0.032291206 | 0.027867266 | 0.029900115 |
| ENSG00000177627 | 0.087125761 | 0.035044934 | 0.038176282 | 0.062171438 |
| ENSG00000064205 | 0.015084515 | 0.025465877 | 0.024688068 | 0.01400589  |
| ENSG00000148943 | 0.032120185 | 0.036333537 | 0.036628118 | 0.02660163  |
| ENSG00000144504 | 0.014415334 | 0.024583718 | 0.024285541 | 0.014577067 |
| ENSG00000187051 | 0.023521971 | 0.028550406 | 0.02809898  | 0.020606545 |
| ENSG00000143318 | 0.048308081 | 0.031519432 | 0.029319205 | 0.026220767 |
| ENSG00000185128 | 0.030949852 | 0.031444532 | 0.03251471  | 0.048649781 |
| ENSG00000182646 | 0.029565412 | 0.031939245 | 0.031030052 | 0.024005956 |
| ENSG00000187223 | 0.015246335 | 0.025183195 | 0.024432332 | 0.015504479 |
| ENSG00000156256 | 0.027580354 | 0.033935532 | 0.034942111 | 0.029136957 |
| ENSG00000119392 | 0.020993616 | 0.029455111 | 0.027148263 | 0.017988227 |
| ENSG00000144339 | 0.019254378 | 0.02774011  | 0.027414688 | 0.020578165 |
| ENSG00000145681 | 0.01850902  | 0.024583689 | 0.024271259 | 0.01513394  |
| ENSG00000198339 | 0.024080632 | 0.032646676 | 0.039736395 | 0.030359914 |
| ENSG00000142233 | 0.017150942 | 0.024933294 | 0.0264027   | 0.016591261 |
| ENSG00000153495 | 0.017498565 | 0.02752296  | 0.024933672 | 0.01851231  |
| ENSG00000138134 | 0.048414288 | 0.05921667  | 0.048547192 | 0.043339211 |
| ENSG00000133111 | 0.016714337 | 0.02527569  | 0.024421329 | 0.015199446 |
| ENSG00000171885 | 0.015678342 | 0.024056216 | 0.02532605  | 0.015813691 |
| ENSG00000112667 | 0.016150318 | 0.02456248  | 0.02523315  | 0.016024624 |
| ENSG00000204574 | 0.030770194 | 0.03377057  | 0.033896427 | 0.02746297  |
| ENSG00000184916 | 0.016794394 | 0.026265502 | 0.026613956 | 0.017896785 |
| ENSG00000163113 | 0.019700095 | 0.028081721 | 0.027627555 | 0.020863766 |
| ENSG00000239839 | 0.016391498 | 0.025419396 | 0.024267247 | 0.015109176 |
| ENSG00000116132 | 0.018969794 | 0.025778847 | 0.025909543 | 0.017924494 |
| ENSG00000141946 | 0.01644005  | 0.025374657 | 0.02641859  | 0.015049479 |
| ENSG00000165678 | 0.02470089  | 0.030072316 | 0.026400006 | 0.026760986 |
| ENSG00000189120 | 0.016062759 | 0.025672288 | 0.027331103 | 0.015635121 |
| ENSG00000109458 | 0.024532009 | 0.027234681 | 0.028867644 | 0.019212877 |
| ENSG00000169375 | 0.026605782 | 0.030526685 | 0.032221753 | 0.025001764 |
| ENSG00000139437 | 0.033836834 | 0.043011696 | 0.037534552 | 0.031342149 |
| ENSG00000125733 | 0.032576007 | 0.033284617 | 0.031354504 | 0.031859631 |
| ENSG00000154928 | 0.111338918 | 0.077802779 | 0.071039282 | 0.088577765 |
| ENSG00000243135 | 0.015920949 | 0.024891431 | 0.02466351  | 0.0145085   |
| ENSG00000197948 | 0.016255015 | 0.024896828 | 0.0252212   | 0.015034437 |
| ENSG00000088247 | 0.0234799   | 0.027764401 | 0.029669741 | 0.028352772 |
| ENSG00000102024 | 0.217922055 | 0.13821585  | 0.120053156 | 0.156266995 |
| ENSG00000049247 | 0.015791289 | 0.061363171 | 0.045936634 | 0.030329052 |

|                 |             |             |             |             |
|-----------------|-------------|-------------|-------------|-------------|
| ENSG00000164300 | 0.015713027 | 0.025766727 | 0.025272339 | 0.016542666 |
| ENSG00000143416 | 0.015939368 | 0.026112613 | 0.026280923 | 0.015062612 |
| ENSG00000197451 | 0.034463868 | 0.034057368 | 0.032783093 | 0.0338388   |
| ENSG00000127955 | 0.018151717 | 0.026069243 | 0.024926103 | 0.015821285 |
| ENSG00000078403 | 0.021149554 | 0.028086435 | 0.026659884 | 0.02414396  |
| ENSG00000159063 | 0.033147006 | 0.035217569 | 0.030919365 | 0.028604117 |
| ENSG00000173209 | 0.030635935 | 0.042037583 | 0.034245302 | 0.032385062 |
| ENSG00000130779 | 0.024625204 | 0.031806802 | 0.028546866 | 0.018854437 |
| ENSG00000196998 | 0.033414257 | 0.0325093   | 0.037397961 | 0.031743674 |
| ENSG00000167658 | 0.018842483 | 0.025690445 | 0.025225929 | 0.019416328 |
| ENSG00000111142 | 0.023922595 | 0.030109357 | 0.029926574 | 0.02045641  |
| ENSG00000011465 | 0.016842707 | 0.026364409 | 0.025065656 | 0.016961446 |
| ENSG00000154640 | 0.03141868  | 0.032219554 | 0.031632517 | 0.025718317 |
| ENSG00000086159 | 0.016481378 | 0.024919051 | 0.024407009 | 0.014953399 |
| ENSG00000187323 | 0.018326044 | 0.027278507 | 0.026290577 | 0.017164979 |
| ENSG00000167916 | 0.017887806 | 0.027178247 | 0.028050453 | 0.017224936 |
| ENSG00000169427 | 0.016698291 | 0.025688252 | 0.026334092 | 0.018385859 |
| ENSG00000161904 | 0.029555026 | 0.032167093 | 0.033224908 | 0.02752278  |
| ENSG00000164299 | 0.014802942 | 0.025139703 | 0.025006987 | 0.014881366 |
| ENSG00000160602 | 0.035691722 | 0.038797211 | 0.039087685 | 0.032630601 |
| ENSG00000088053 | 0.016613789 | 0.02450749  | 0.024819181 | 0.015207609 |
| ENSG00000106524 | 0.038093605 | 0.038557467 | 0.036379922 | 0.03115214  |
| ENSG00000169083 | 0.030397623 | 0.025526622 | 0.02545124  | 0.017804923 |
| ENSG00000104879 | 0.015690996 | 0.024582027 | 0.025265146 | 0.014955702 |
| ENSG00000134283 | 0.02919334  | 0.040294411 | 0.031485244 | 0.025420502 |
| ENSG00000149507 | 0.015057059 | 0.024228447 | 0.026206228 | 0.014849699 |
| ENSG00000113721 | 0.064716056 | 0.066684417 | 0.057182793 | 0.051829794 |
| ENSG00000136250 | 0.019469941 | 0.025260528 | 0.025707539 | 0.016795361 |
| ENSG00000128626 | 0.015955375 | 0.025430532 | 0.025131159 | 0.017645216 |
| ENSG00000197275 | 0.015528955 | 0.024634682 | 0.024820817 | 0.016544439 |
| ENSG00000185634 | 0.03329468  | 0.033684929 | 0.02990229  | 0.025001737 |
| ENSG00000102309 | 0.031523752 | 0.026860747 | 0.026492006 | 0.021751719 |
| ENSG00000105509 | 0.016252998 | 0.026139475 | 0.025041719 | 0.016345194 |
| ENSG00000163947 | 0.067570757 | 0.058942239 | 0.062358926 | 0.062777076 |
| ENSG00000169981 | 0.036161248 | 0.065227625 | 0.067407879 | 0.051504544 |
| ENSG00000164040 | 0.034070269 | 0.034163196 | 0.03515596  | 0.025820289 |
| ENSG00000187908 | 0.017821811 | 0.026604063 | 0.0257071   | 0.017321923 |
| ENSG00000132170 | 0.125191558 | 0.092222357 | 0.073986445 | 0.093286763 |
| ENSG00000106771 | 0.030493629 | 0.035298449 | 0.02912682  | 0.028833322 |
| ENSG00000187535 | 0.015571266 | 0.026667244 | 0.025801367 | 0.017638843 |
| ENSG00000117643 | 0.029295106 | 0.036793549 | 0.034815226 | 0.040428376 |
| ENSG00000164506 | 0.039447071 | 0.045361569 | 0.043919387 | 0.045014677 |
| ENSG00000100320 | 0.01647093  | 0.025084023 | 0.024618234 | 0.01526643  |
| ENSG00000157551 | 0.037243565 | 0.026039641 | 0.025647419 | 0.015707905 |
| ENSG00000148400 | 0.046281811 | 0.048648677 | 0.041684185 | 0.043587849 |
| ENSG00000101850 | 0.016892439 | 0.024569175 | 0.024941897 | 0.0157943   |
| ENSG00000186487 | 0.016690771 | 0.025263911 | 0.024582195 | 0.015856354 |
| ENSG00000135643 | 0.044067085 | 0.042711084 | 0.041184872 | 0.043068895 |
| ENSG00000135637 | 0.019395503 | 0.029184404 | 0.025452055 | 0.023168194 |
| ENSG00000143924 | 0.039775443 | 0.036886731 | 0.037847441 | 0.035054753 |
| ENSG00000156853 | 0.03637793  | 0.043604068 | 0.04459203  | 0.035525988 |
| ENSG00000068796 | 0.025752652 | 0.037341898 | 0.032653789 | 0.025005345 |
| ENSG00000100380 | 0.026409435 | 0.028456361 | 0.027467907 | 0.0296406   |
| ENSG00000072135 | 0.030109439 | 0.032697716 | 0.033074598 | 0.02917269  |

|                 |             |             |             |             |
|-----------------|-------------|-------------|-------------|-------------|
| ENSG00000163794 | 0.023916737 | 0.028304782 | 0.028414714 | 0.026983998 |
| ENSG00000028277 | 0.035367835 | 0.034303586 | 0.037196398 | 0.03547272  |
| ENSG00000139289 | 0.024684425 | 0.033768988 | 0.027072589 | 0.023519539 |
| ENSG00000138709 | 0.047278299 | 0.04453627  | 0.047725082 | 0.04636924  |
| ENSG00000175575 | 0.030536543 | 0.038807928 | 0.035295873 | 0.022933403 |
| ENSG00000154027 | 0.019023687 | 0.026510832 | 0.029379557 | 0.017598038 |
| ENSG00000106031 | 0.017802591 | 0.025652983 | 0.024209012 | 0.016907397 |
| ENSG00000185915 | 0.024448196 | 0.030000258 | 0.032415155 | 0.027371422 |
| ENSG00000151729 | 0.033945876 | 0.032216777 | 0.034140298 | 0.030464698 |
| ENSG00000084463 | 0.023138093 | 0.02884468  | 0.029407042 | 0.023217245 |
| ENSG00000198408 | 0.022665179 | 0.030676162 | 0.029994089 | 0.020613637 |
| ENSG00000241186 | 0.015496988 | 0.025366938 | 0.025417712 | 0.01661967  |
| ENSG00000108443 | 0.019251559 | 0.026069779 | 0.027577484 | 0.020820274 |
| ENSG00000110975 | 0.018602008 | 0.025456436 | 0.025980586 | 0.016459612 |
| ENSG00000162341 | 0.050594895 | 0.049069381 | 0.043678873 | 0.042995141 |
| ENSG00000132394 | 0.028350487 | 0.028785077 | 0.03001438  | 0.027596297 |
| ENSG00000171311 | 0.018087468 | 0.026063744 | 0.029106739 | 0.017661911 |
| ENSG00000185670 | 0.027866896 | 0.036186721 | 0.036884625 | 0.024998548 |
| ENSG00000099219 | 0.044360182 | 0.041464234 | 0.037355273 | 0.038663117 |
| ENSG00000148484 | 0.044515979 | 0.052036964 | 0.043929937 | 0.044689529 |
| ENSG00000197361 | 0.024941611 | 0.028982395 | 0.029614264 | 0.025222475 |
| ENSG00000065518 | 0.017732369 | 0.026807179 | 0.025757834 | 0.015983379 |
| ENSG00000046651 | 0.035539935 | 0.040714875 | 0.039571228 | 0.034593966 |
| ENSG00000179148 | 0.01851583  | 0.025198832 | 0.025149247 | 0.015075878 |
| ENSG00000165997 | 0.038382195 | 0.043660136 | 0.045717241 | 0.038254822 |
| ENSG00000162777 | 0.054706209 | 0.060087212 | 0.058771555 | 0.048000917 |
| ENSG00000182472 | 0.047678223 | 0.05185399  | 0.042845233 | 0.053319412 |
| ENSG00000241058 | 0.038552151 | 0.040185427 | 0.037417607 | 0.029474097 |
| ENSG00000117971 | 0.017429712 | 0.025640595 | 0.025137239 | 0.015816647 |
| ENSG00000110172 | 0.049936569 | 0.060844803 | 0.050693868 | 0.0402766   |
| ENSG00000168701 | 0.030753948 | 0.033920913 | 0.038936343 | 0.031955538 |
| ENSG00000091482 | 0.016377866 | 0.025576151 | 0.024490749 | 0.015335487 |
| ENSG00000221843 | 0.016109762 | 0.024831944 | 0.024532139 | 0.015217589 |
| ENSG00000128918 | 0.027025928 | 0.024892137 | 0.025378356 | 0.017531947 |
| ENSG00000072858 | 0.037182252 | 0.044541898 | 0.035502478 | 0.035048982 |
| ENSG00000143105 | 0.016888868 | 0.02609741  | 0.025401729 | 0.015592891 |
| ENSG00000133030 | 0.030967279 | 0.035906799 | 0.032227477 | 0.02728501  |
| ENSG00000175785 | 0.017058856 | 0.025033961 | 0.02628611  | 0.016407497 |
| ENSG00000156689 | 0.04197554  | 0.036829007 | 0.030259204 | 0.023165845 |
| ENSG00000183914 | 0.015775504 | 0.025966194 | 0.026077989 | 0.015295117 |
| ENSG00000072201 | 0.036341481 | 0.041134429 | 0.026259869 | 0.016453974 |
| ENSG00000136573 | 0.06130535  | 0.072314539 | 0.070715427 | 0.058312793 |
| ENSG00000172005 | 0.105210679 | 0.084767058 | 0.079267797 | 0.090332721 |
| ENSG00000170684 | 0.035274304 | 0.030712419 | 0.03031917  | 0.031900496 |
| ENSG00000100170 | 0.016690807 | 0.026271939 | 0.025418281 | 0.016410428 |
| ENSG00000140948 | 0.051475122 | 0.042331972 | 0.034922838 | 0.045374533 |
| ENSG00000229676 | 0.030343727 | 0.032305183 | 0.03130773  | 0.027790999 |
| ENSG00000100362 | 0.015402939 | 0.025790068 | 0.025020091 | 0.015601135 |
| ENSG00000157827 | 0.09328674  | 0.068749902 | 0.065499946 | 0.071911109 |
| ENSG00000129450 | 0.015062531 | 0.025012837 | 0.024628912 | 0.015232755 |
| ENSG00000213339 | 0.032951055 | 0.033892467 | 0.030037744 | 0.026197654 |
| ENSG00000160799 | 0.026538367 | 0.03013756  | 0.033310976 | 0.026725418 |
| ENSG00000170166 | 0.016420761 | 0.024600907 | 0.024408824 | 0.015120506 |
| ENSG00000100429 | 0.017992198 | 0.02866778  | 0.028137595 | 0.016734718 |

|                 |             |             |             |             |
|-----------------|-------------|-------------|-------------|-------------|
| ENSG0000089597  | 0.030129579 | 0.029022022 | 0.035336073 | 0.027471863 |
| ENSG00000144550 | 0.019084357 | 0.026369964 | 0.024958014 | 0.017147592 |
| ENSG00000175463 | 0.032029943 | 0.030389571 | 0.033724995 | 0.03089836  |
| ENSG00000149499 | 0.024720536 | 0.028969087 | 0.030785718 | 0.026185453 |
| ENSG00000095203 | 0.016416461 | 0.026042629 | 0.025798433 | 0.01669305  |
| ENSG00000185008 | 0.032883323 | 0.025671283 | 0.024628427 | 0.015910083 |
| ENSG00000148344 | 0.015170888 | 0.02513278  | 0.025066724 | 0.014702885 |
| ENSG00000141744 | 0.019828081 | 0.026955595 | 0.025979509 | 0.019188108 |
| ENSG00000075975 | 0.025186863 | 0.03248365  | 0.035997878 | 0.0262369   |
| ENSG00000183066 | 0.017136498 | 0.026261525 | 0.025919575 | 0.02330951  |
| ENSG00000116983 | 0.020817332 | 0.02606958  | 0.025944572 | 0.017559406 |
| ENSG00000168925 | 0.015138014 | 0.024777351 | 0.024789537 | 0.014853935 |
| ENSG00000064012 | 0.039780955 | 0.037941154 | 0.033164514 | 0.032510351 |
| ENSG00000184345 | 0.015902363 | 0.02554277  | 0.024995188 | 0.014683617 |
| ENSG00000138646 | 0.050783771 | 0.047254837 | 0.038530112 | 0.038343973 |
| ENSG00000169432 | 0.016189609 | 0.024759328 | 0.024619863 | 0.01495561  |
| ENSG00000164144 | 0.026522253 | 0.033815939 | 0.030934642 | 0.025941343 |
| ENSG00000180205 | 0.017378852 | 0.025472644 | 0.024527991 | 0.016758393 |
| ENSG00000087157 | 0.027804117 | 0.032957007 | 0.033949165 | 0.02988805  |
| ENSG00000069424 | 0.022408345 | 0.026756916 | 0.030535375 | 0.021426168 |
| ENSG00000127328 | 0.034305078 | 0.034799816 | 0.03458402  | 0.031516253 |
| ENSG00000198610 | 0.060612105 | 0.028476554 | 0.025104491 | 0.019524167 |
| ENSG00000164615 | 0.027939046 | 0.031453082 | 0.031088016 | 0.023825594 |
| ENSG00000100068 | 0.056342785 | 0.049509842 | 0.04205413  | 0.050328579 |
| ENSG00000124155 | 0.032208658 | 0.033889649 | 0.034812231 | 0.025671488 |
| ENSG00000196150 | 0.025936874 | 0.028212705 | 0.030155786 | 0.019822691 |
| ENSG00000196535 | 0.016833066 | 0.026216477 | 0.025182141 | 0.014786207 |
| ENSG00000176973 | 0.037793459 | 0.043242138 | 0.045842017 | 0.034441038 |
| ENSG00000172232 | 0.016106942 | 0.025487339 | 0.02507858  | 0.017527053 |
| ENSG00000134013 | 0.066150903 | 0.055503165 | 0.069629675 | 0.062237357 |
| ENSG00000137486 | 0.020608878 | 0.028513142 | 0.026883211 | 0.01937581  |
| ENSG00000012171 | 0.016187897 | 0.025554458 | 0.025101906 | 0.015490844 |
| ENSG00000138686 | 0.031148705 | 0.040338192 | 0.034804677 | 0.031387748 |
| ENSG00000115464 | 0.029154634 | 0.039187249 | 0.033200058 | 0.02589162  |
| ENSG00000174595 | 0.023722734 | 0.026735798 | 0.026029227 | 0.021897191 |
| ENSG00000124664 | 0.01601871  | 0.025372478 | 0.025884682 | 0.014545026 |
| ENSG00000101004 | 0.061037269 | 0.056843017 | 0.066148249 | 0.063478724 |
| ENSG00000013293 | 0.018721041 | 0.025899922 | 0.027348163 | 0.016729511 |
| ENSG00000196735 | 0.331149452 | 0.391001966 | 0.283226671 | 0.32766191  |
| ENSG00000159921 | 0.032556958 | 0.036567147 | 0.036398263 | 0.028584975 |
| ENSG00000180071 | 0.017766105 | 0.025799981 | 0.02527947  | 0.018621952 |
| ENSG00000158270 | 0.100317346 | 0.05610344  | 0.054078573 | 0.079201056 |
| ENSG00000105671 | 0.036246027 | 0.038092196 | 0.033295201 | 0.035337023 |
| ENSG00000197403 | 0.016076232 | 0.025274545 | 0.024530857 | 0.016801052 |
| ENSG00000077235 | 0.024164751 | 0.030165955 | 0.035374859 | 0.026707221 |
| ENSG00000011028 | 0.032391836 | 0.031608852 | 0.029877367 | 0.026134001 |
| ENSG00000164180 | 0.023125031 | 0.029863878 | 0.028916239 | 0.020125799 |
| ENSG00000162897 | 0.019436959 | 0.027060124 | 0.026618587 | 0.018295992 |
| ENSG00000174611 | 0.017672743 | 0.025043188 | 0.025860347 | 0.016653046 |
| ENSG00000126860 | 0.04654253  | 0.049369308 | 0.039683119 | 0.041083793 |
| ENSG00000135324 | 0.015671605 | 0.025608129 | 0.024446148 | 0.016695659 |
| ENSG00000176720 | 0.015689464 | 0.025805778 | 0.0254361   | 0.015448536 |
| ENSG00000159784 | 0.015300761 | 0.025029153 | 0.024800376 | 0.016865097 |
| ENSG00000068912 | 0.032350827 | 0.036538131 | 0.041602261 | 0.03386383  |

|                 |             |             |             |             |
|-----------------|-------------|-------------|-------------|-------------|
| ENSG00000181222 | 0.02508174  | 0.029858315 | 0.039867825 | 0.026266079 |
| ENSG00000090686 | 0.031997762 | 0.035415892 | 0.031764654 | 0.02489152  |
| ENSG00000198393 | 0.034395772 | 0.035058061 | 0.033588509 | 0.027527352 |
| ENSG00000103740 | 0.03897952  | 0.038163115 | 0.028947119 | 0.024690133 |
| ENSG00000133226 | 0.02214481  | 0.028891778 | 0.02779246  | 0.016886524 |
| ENSG00000153707 | 0.019130821 | 0.027065037 | 0.026030467 | 0.019053685 |
| ENSG00000135457 | 0.041841148 | 0.048477559 | 0.036103091 | 0.036408646 |
| ENSG00000183665 | 0.035189746 | 0.033032311 | 0.047472596 | 0.037100288 |
| ENSG00000152910 | 0.017268737 | 0.024623357 | 0.025965339 | 0.016508328 |
| ENSG00000100453 | 0.028209158 | 0.036104623 | 0.039449296 | 0.025263818 |
| ENSG00000188613 | 0.019841589 | 0.028083705 | 0.027104683 | 0.020005317 |
| ENSG00000160221 | 0.027553486 | 0.033858234 | 0.029066183 | 0.02979036  |
| ENSG00000183439 | 0.05227931  | 0.040470731 | 0.03456834  | 0.036444025 |
| ENSG00000134575 | 0.026710099 | 0.033141173 | 0.033405893 | 0.029351094 |
| ENSG00000132002 | 0.042924962 | 0.033511989 | 0.031384992 | 0.031410931 |
| ENSG00000214050 | 0.033396407 | 0.033135814 | 0.033631506 | 0.029735774 |
| ENSG00000166394 | 0.102829957 | 0.077897594 | 0.071475001 | 0.085649647 |
| ENSG00000102384 | 0.043391622 | 0.048250837 | 0.033664618 | 0.029165202 |
| ENSG00000204889 | 0.018591355 | 0.026172696 | 0.026430464 | 0.018379504 |
| ENSG00000130513 | 0.095438545 | 0.068142492 | 0.073133741 | 0.086714193 |
| ENSG00000186017 | 0.026554004 | 0.030306608 | 0.027395373 | 0.024682684 |
| ENSG00000135903 | 0.014956949 | 0.0246308   | 0.024683454 | 0.014624391 |
| ENSG00000143537 | 0.04206206  | 0.041871018 | 0.037723231 | 0.036754428 |
| ENSG00000115468 | 0.016467786 | 0.024559856 | 0.025715995 | 0.016295683 |
| ENSG00000127419 | 0.037248351 | 0.049358989 | 0.040999566 | 0.035227903 |
| ENSG00000112144 | 0.022901965 | 0.026989773 | 0.028422886 | 0.021524603 |
| ENSG00000116584 | 0.025471491 | 0.031901332 | 0.031605379 | 0.025475343 |
| ENSG00000162851 | 0.031183702 | 0.035968778 | 0.040248841 | 0.035101038 |
| ENSG00000198108 | 0.017069519 | 0.025803622 | 0.024895809 | 0.015603572 |
| ENSG00000170445 | 0.019235882 | 0.028517641 | 0.028151096 | 0.022328914 |
| ENSG00000074181 | 0.014935958 | 0.024806016 | 0.024580006 | 0.014235546 |
| ENSG00000241697 | 0.017204314 | 0.027696386 | 0.025227005 | 0.017271561 |
| ENSG00000159388 | 0.033523905 | 0.032963483 | 0.03134753  | 0.027824405 |
| ENSG00000140406 | 0.038965977 | 0.04660064  | 0.05346841  | 0.043641682 |
| ENSG00000178394 | 0.015335896 | 0.024797888 | 0.024856545 | 0.015426726 |
| ENSG00000180658 | 0.017952935 | 0.025274854 | 0.02563217  | 0.015326317 |
| ENSG00000070214 | 0.06361619  | 0.051302078 | 0.043356673 | 0.046135524 |
| ENSG00000142698 | 0.016081239 | 0.024182574 | 0.024691689 | 0.015924132 |
| ENSG00000117148 | 0.01749336  | 0.026061257 | 0.025343873 | 0.016647177 |
| ENSG00000169964 | 0.032821648 | 0.03335983  | 0.033244457 | 0.028157186 |
| ENSG00000154620 | 0.16768477  | 0.151314    | 0.138781254 | 0.144325397 |
| ENSG00000118200 | 0.036648672 | 0.042808512 | 0.040917621 | 0.042590977 |
| ENSG00000136514 | 0.048497962 | 0.049798493 | 0.044674719 | 0.041614139 |
| ENSG00000253537 | 0.017454879 | 0.025328646 | 0.024579783 | 0.01596127  |
| ENSG00000164305 | 0.017640405 | 0.025542625 | 0.025079247 | 0.015673704 |
| ENSG00000146385 | 0.015499549 | 0.024426024 | 0.025091811 | 0.016699445 |
| ENSG00000173889 | 0.032029917 | 0.037176762 | 0.037384167 | 0.025831949 |
| ENSG00000065989 | 0.062875682 | 0.055638865 | 0.067252355 | 0.045510524 |
| ENSG00000189366 | 0.022312848 | 0.028645247 | 0.027257381 | 0.022850227 |
| ENSG00000104112 | 0.021242587 | 0.028531891 | 0.026358927 | 0.022392941 |
| ENSG00000026508 | 0.047665576 | 0.046279538 | 0.051361509 | 0.055993413 |
| ENSG00000174943 | 0.026236009 | 0.031728941 | 0.031545151 | 0.02811746  |
| ENSG00000161203 | 0.028596671 | 0.035439132 | 0.031005858 | 0.024429073 |
| ENSG00000163453 | 0.015769884 | 0.025154026 | 0.024712303 | 0.016179    |

|                 |             |             |             |             |
|-----------------|-------------|-------------|-------------|-------------|
| ENSG00000243452 | 0.028075871 | 0.03357365  | 0.030063376 | 0.025071964 |
| ENSG00000181778 | 0.015852575 | 0.025109208 | 0.025176475 | 0.015508155 |
| ENSG00000031698 | 0.021344228 | 0.026641233 | 0.03062093  | 0.018411032 |
| ENSG00000212938 | 0.015853432 | 0.024866889 | 0.025032054 | 0.014838711 |
| ENSG00000112365 | 0.033734381 | 0.035970546 | 0.035837092 | 0.029105958 |
| ENSG00000122484 | 0.029933229 | 0.036415966 | 0.030090139 | 0.023886147 |
| ENSG00000119661 | 0.019622306 | 0.02689981  | 0.026500073 | 0.017865272 |
| ENSG00000080608 | 0.032131064 | 0.032529403 | 0.031226106 | 0.031085134 |
| ENSG00000169679 | 0.035421465 | 0.042170814 | 0.034934856 | 0.028968148 |
| ENSG00000130489 | 0.031033508 | 0.039777104 | 0.044782828 | 0.028734758 |
| ENSG00000003400 | 0.016056454 | 0.025067597 | 0.025658154 | 0.018270594 |
| ENSG00000107438 | 0.034151284 | 0.03356279  | 0.034973099 | 0.036118633 |
| ENSG00000075407 | 0.034808591 | 0.035466301 | 0.034915857 | 0.035404714 |
| ENSG00000108064 | 0.030148491 | 0.044201901 | 0.047642648 | 0.024924736 |
| ENSG00000128699 | 0.056048905 | 0.061357819 | 0.059150114 | 0.049060717 |
| ENSG00000149182 | 0.024809688 | 0.029226445 | 0.035551529 | 0.027095325 |
| ENSG00000186918 | 0.080917183 | 0.047431831 | 0.049527861 | 0.05148218  |
| ENSG00000162385 | 0.028956448 | 0.03374509  | 0.032214834 | 0.024921179 |
| ENSG00000197696 | 0.036157513 | 0.043333356 | 0.037035449 | 0.031729826 |
| ENSG00000165629 | 0.0204377   | 0.027066676 | 0.025013729 | 0.016477455 |
| ENSG00000128513 | 0.034063902 | 0.040564945 | 0.033289995 | 0.037292441 |
| ENSG00000254014 | 0.02700847  | 0.030483416 | 0.030781471 | 0.026013134 |
| ENSG00000142875 | 0.016032197 | 0.024690629 | 0.026510685 | 0.015429753 |
| ENSG00000100347 | 0.024648257 | 0.029253057 | 0.030199027 | 0.024137976 |
| ENSG00000132467 | 0.025525503 | 0.03427502  | 0.037180552 | 0.026795008 |
| ENSG00000162624 | 0.015482816 | 0.025154424 | 0.024880936 | 0.015246502 |
| ENSG00000068137 | 0.046493744 | 0.037665133 | 0.041905593 | 0.041492168 |
| ENSG00000129167 | 0.016672176 | 0.025534784 | 0.02560252  | 0.015198995 |
| ENSG00000204542 | 0.015956323 | 0.025213014 | 0.024676829 | 0.017279649 |
| ENSG00000157219 | 0.014695021 | 0.025361718 | 0.025484545 | 0.015602541 |
| ENSG00000175697 | 0.017116738 | 0.025692256 | 0.027329771 | 0.017048237 |
| ENSG00000179292 | 0.016970031 | 0.02522455  | 0.024918826 | 0.015426013 |
| ENSG00000197472 | 0.06870288  | 0.040229815 | 0.044102909 | 0.050534699 |
| ENSG00000104946 | 0.040294594 | 0.046388686 | 0.038702553 | 0.039676725 |
| ENSG00000043093 | 0.030276757 | 0.036843816 | 0.034656603 | 0.024925407 |
| ENSG00000115652 | 0.040784227 | 0.046089926 | 0.039189441 | 0.03961619  |
| ENSG00000166147 | 0.059899927 | 0.063037587 | 0.056849933 | 0.069581123 |
| ENSG00000135925 | 0.089151122 | 0.064906536 | 0.079263342 | 0.07761203  |
| ENSG00000119681 | 0.017666869 | 0.025637698 | 0.024882688 | 0.015072945 |
| ENSG00000167186 | 0.033506832 | 0.032398454 | 0.032206133 | 0.029335629 |
| ENSG00000197123 | 0.016158999 | 0.024635561 | 0.024394164 | 0.015170297 |
| ENSG00000167419 | 0.017575998 | 0.026579066 | 0.025121897 | 0.015686811 |
| ENSG00000141524 | 0.033198987 | 0.031258695 | 0.035354462 | 0.030802323 |
| ENSG00000204381 | 0.068612646 | 0.041460589 | 0.032617261 | 0.055680884 |
| ENSG00000113302 | 0.051642451 | 0.039436468 | 0.050945636 | 0.044235615 |
| ENSG00000184144 | 0.022645098 | 0.029605735 | 0.027849238 | 0.01971271  |
| ENSG00000146776 | 0.015804494 | 0.024539591 | 0.025446167 | 0.014377249 |
| ENSG00000112078 | 0.022356418 | 0.02857413  | 0.028566585 | 0.018769449 |
| ENSG00000100079 | 0.055411051 | 0.025227524 | 0.027446656 | 0.016351959 |
| ENSG00000188386 | 0.017971823 | 0.027761814 | 0.026684132 | 0.017036982 |
| ENSG00000101966 | 0.03291145  | 0.030358459 | 0.034389284 | 0.024362821 |
| ENSG00000130150 | 0.034925816 | 0.037722605 | 0.033277112 | 0.028141603 |
| ENSG00000148459 | 0.03699216  | 0.035165129 | 0.032119221 | 0.038700241 |
| ENSG00000171246 | 0.015966722 | 0.025148717 | 0.025769899 | 0.02816293  |

|                 |             |             |             |             |
|-----------------|-------------|-------------|-------------|-------------|
| ENSG00000163161 | 0.022067273 | 0.031115379 | 0.034564415 | 0.02485458  |
| ENSG00000168724 | 0.025185576 | 0.030362761 | 0.032333213 | 0.023540738 |
| ENSG00000125247 | 0.044108855 | 0.040233079 | 0.034334179 | 0.033562958 |
| ENSG00000197249 | 0.076297039 | 0.039001619 | 0.029153441 | 0.059581192 |
| ENSG00000066084 | 0.036921007 | 0.036179821 | 0.037551268 | 0.036828292 |
| ENSG00000130940 | 0.052869393 | 0.045571427 | 0.040069061 | 0.046703166 |
| ENSG00000187626 | 0.030255706 | 0.035057889 | 0.032054389 | 0.023392814 |
| ENSG00000139178 | 0.029492243 | 0.036214157 | 0.030848467 | 0.026327446 |
| ENSG00000178538 | 0.022650287 | 0.025492181 | 0.025001721 | 0.020488665 |
| ENSG00000213231 | 0.016763338 | 0.025151201 | 0.024722455 | 0.016020855 |
| ENSG00000172689 | 0.01607832  | 0.02453622  | 0.025968044 | 0.016585663 |
| ENSG00000198855 | 0.039780788 | 0.039036109 | 0.053372158 | 0.045419843 |
| ENSG00000215018 | 0.018588404 | 0.026971826 | 0.027405802 | 0.020105152 |
| ENSG00000135766 | 0.053995114 | 0.043475717 | 0.042699355 | 0.039945441 |
| ENSG00000102796 | 0.033694772 | 0.033498996 | 0.036762031 | 0.028855091 |
| ENSG00000179299 | 0.03538459  | 0.040238299 | 0.030087219 | 0.023131359 |
| ENSG00000131873 | 0.032293112 | 0.034341709 | 0.032149652 | 0.025691006 |
| ENSG00000074800 | 0.018138178 | 0.024816755 | 0.024687919 | 0.016464194 |
| ENSG00000175054 | 0.033593266 | 0.039732448 | 0.03123267  | 0.029638827 |
| ENSG00000166965 | 0.030754713 | 0.0310613   | 0.028300561 | 0.023758411 |
| ENSG00000131711 | 0.059033006 | 0.034294442 | 0.026118006 | 0.024754547 |
| ENSG00000172428 | 0.014976216 | 0.025359167 | 0.024764678 | 0.014272547 |
| ENSG00000151458 | 0.054890945 | 0.044782745 | 0.039998559 | 0.042237137 |
| ENSG00000189410 | 0.026339364 | 0.03478876  | 0.028839405 | 0.022912659 |
| ENSG00000118557 | 0.017135683 | 0.026790704 | 0.025008644 | 0.017427048 |
| ENSG00000184428 | 0.032988364 | 0.03565335  | 0.036260412 | 0.047139349 |
| ENSG00000125772 | 0.038896682 | 0.039887666 | 0.043916571 | 0.040042877 |
| ENSG00000140365 | 0.020125786 | 0.026695277 | 0.025588401 | 0.017779284 |
| ENSG00000154803 | 0.038965083 | 0.040363204 | 0.038386191 | 0.026574764 |
| ENSG00000156467 | 0.033701023 | 0.035542787 | 0.033167561 | 0.025210628 |
| ENSG00000103089 | 0.051913871 | 0.062401904 | 0.051106222 | 0.051054912 |
| ENSG00000166979 | 0.018443488 | 0.026029513 | 0.026087777 | 0.016274487 |
| ENSG00000130590 | 0.020463708 | 0.026604324 | 0.026081628 | 0.020120905 |
| ENSG00000162009 | 0.016685538 | 0.025619288 | 0.024532514 | 0.015692798 |
| ENSG00000159023 | 0.018297675 | 0.025499701 | 0.026098736 | 0.016011825 |
| ENSG00000196498 | 0.021876561 | 0.031435749 | 0.033460696 | 0.025207234 |
| ENSG00000164051 | 0.029495941 | 0.032441354 | 0.028839887 | 0.021471643 |
| ENSG00000225485 | 0.016042404 | 0.024942463 | 0.025270265 | 0.01582117  |
| ENSG0000006638  | 0.014952535 | 0.024444316 | 0.025177067 | 0.014301003 |
| ENSG00000166165 | 0.096875857 | 0.06535707  | 0.06179984  | 0.079716247 |
| ENSG00000145649 | 0.01438675  | 0.02589983  | 0.025413965 | 0.024733709 |
| ENSG00000138835 | 0.015996422 | 0.02585325  | 0.024827012 | 0.015466788 |
| ENSG00000105428 | 0.01482555  | 0.024201701 | 0.024436796 | 0.014523308 |
| ENSG00000100225 | 0.019952154 | 0.028868882 | 0.032422811 | 0.021979651 |
| ENSG00000101746 | 0.073636704 | 0.030422622 | 0.025805304 | 0.025854292 |
| ENSG00000091879 | 0.015295929 | 0.025189136 | 0.025237803 | 0.014198943 |
| ENSG00000111358 | 0.036531835 | 0.044439463 | 0.035880226 | 0.042275477 |
| ENSG00000112559 | 0.016393302 | 0.024870685 | 0.025731415 | 0.016173101 |
| ENSG00000163053 | 0.043214068 | 0.032032235 | 0.032273327 | 0.029091415 |
| ENSG00000171729 | 0.143554414 | 0.095664814 | 0.096107969 | 0.111462022 |
| ENSG00000108784 | 0.029475181 | 0.031234772 | 0.031562486 | 0.024364861 |
| ENSG00000129204 | 0.036246609 | 0.040129029 | 0.035915261 | 0.041497724 |
| ENSG00000196233 | 0.034356814 | 0.039838125 | 0.045206288 | 0.030293374 |
| ENSG00000125731 | 0.020812994 | 0.026948408 | 0.028825775 | 0.021327317 |



|                 |             |             |             |             |
|-----------------|-------------|-------------|-------------|-------------|
| ENSG00000196776 | 0.030332558 | 0.041153388 | 0.045025017 | 0.035753754 |
| ENSG00000111262 | 0.033601332 | 0.03119579  | 0.027715269 | 0.026816443 |
| ENSG00000186160 | 0.015321155 | 0.024620806 | 0.025470661 | 0.014547293 |
| ENSG00000103197 | 0.015433511 | 0.024965543 | 0.024914583 | 0.015981873 |
| ENSG00000138613 | 0.032225995 | 0.04670985  | 0.043981876 | 0.028039167 |
| ENSG00000136048 | 0.037263571 | 0.046746323 | 0.047896974 | 0.035598178 |
| ENSG00000176155 | 0.015794481 | 0.025688755 | 0.025386471 | 0.017869246 |
| ENSG00000134690 | 0.043213863 | 0.03761903  | 0.038026465 | 0.036421433 |
| ENSG00000176148 | 0.017510423 | 0.026422574 | 0.026604441 | 0.017819249 |
| ENSG00000185305 | 0.03013984  | 0.031927063 | 0.02897159  | 0.022132208 |
| ENSG00000076716 | 0.17265957  | 0.11641444  | 0.102407962 | 0.129722524 |
| ENSG00000180974 | 0.022459043 | 0.024770732 | 0.02433629  | 0.019947485 |
| ENSG00000171608 | 0.026866504 | 0.030840391 | 0.02911911  | 0.028268943 |
| ENSG00000187372 | 0.019849936 | 0.026668611 | 0.026782568 | 0.018863604 |
| ENSG00000172890 | 0.027667773 | 0.033079894 | 0.031247645 | 0.028210648 |
| ENSG00000144747 | 0.038788143 | 0.04130449  | 0.042302315 | 0.036242942 |
| ENSG00000180433 | 0.016273109 | 0.025441547 | 0.023969181 | 0.016096253 |
| ENSG00000172927 | 0.082384506 | 0.073065661 | 0.069260268 | 0.098450902 |
| ENSG00000149091 | 0.017087519 | 0.026267073 | 0.025308643 | 0.015649245 |
| ENSG00000118523 | 0.015301299 | 0.025038947 | 0.026152922 | 0.016599738 |
| ENSG00000164105 | 0.039493824 | 0.038930485 | 0.036465498 | 0.03254776  |
| ENSG00000174937 | 0.017012592 | 0.025696351 | 0.024363258 | 0.015483004 |
| ENSG00000176029 | 0.01793703  | 0.026774188 | 0.026996595 | 0.015157995 |
| ENSG00000179912 | 0.0354549   | 0.035407485 | 0.031107671 | 0.034009147 |
| ENSG00000064601 | 0.032818085 | 0.037212093 | 0.033900065 | 0.030128402 |
| ENSG00000126217 | 0.016383232 | 0.024800753 | 0.024849309 | 0.014921755 |
| ENSG00000114270 | 0.047925625 | 0.044845004 | 0.035400644 | 0.045020666 |
| ENSG00000174325 | 0.015650534 | 0.025493143 | 0.024917564 | 0.014556622 |
| ENSG00000198918 | 0.014042003 | 0.023838595 | 0.023849453 | 0.015839742 |
| ENSG00000179930 | 0.015284634 | 0.025117438 | 0.024575305 | 0.015494018 |
| ENSG00000086062 | 0.03665265  | 0.037743495 | 0.047080688 | 0.046274961 |
| ENSG00000143257 | 0.015853234 | 0.024304766 | 0.025367649 | 0.016097255 |
| ENSG00000067369 | 0.026810515 | 0.03435654  | 0.029703782 | 0.021085081 |
| ENSG00000196407 | 0.015800116 | 0.024527816 | 0.024891769 | 0.016743572 |
| ENSG00000196557 | 0.023113067 | 0.030720972 | 0.030654419 | 0.02373514  |
| ENSG00000182732 | 0.083503497 | 0.038380157 | 0.030688761 | 0.047862464 |
| ENSG00000100099 | 0.016706434 | 0.025140931 | 0.025571438 | 0.016135688 |
| ENSG00000185862 | 0.040237697 | 0.040913068 | 0.040992033 | 0.034574612 |
| ENSG00000121152 | 0.04271697  | 0.034425771 | 0.036941785 | 0.03462744  |
| ENSG00000049167 | 0.033816072 | 0.039669038 | 0.031619954 | 0.029241406 |
| ENSG00000124222 | 0.032262471 | 0.044573489 | 0.036932702 | 0.031139464 |
| ENSG00000143801 | 0.039621344 | 0.037391623 | 0.037614861 | 0.034345696 |
| ENSG00000175756 | 0.022201854 | 0.026616461 | 0.02659324  | 0.01933684  |
| ENSG00000138382 | 0.023833321 | 0.029677869 | 0.02781799  | 0.019218639 |
| ENSG00000104626 | 0.037196557 | 0.036563871 | 0.031352313 | 0.038451529 |
| ENSG00000126709 | 0.05373567  | 0.046788744 | 0.040181029 | 0.037838816 |
| ENSG00000106052 | 0.026177532 | 0.03371801  | 0.031351886 | 0.02866746  |
| ENSG00000204538 | 0.017458699 | 0.024457576 | 0.025169939 | 0.016418583 |
| ENSG00000134532 | 0.016812182 | 0.025715278 | 0.025404463 | 0.016087558 |
| ENSG00000156052 | 0.016295326 | 0.02412283  | 0.025584595 | 0.015128205 |
| ENSG00000172346 | 0.016028181 | 0.024522228 | 0.025377317 | 0.015060294 |
| ENSG00000104738 | 0.015898402 | 0.024368843 | 0.024742582 | 0.01530812  |
| ENSG00000006451 | 0.031229963 | 0.03616     | 0.032761346 | 0.031815841 |
| ENSG00000221869 | 0.070992676 | 0.063730944 | 0.072098243 | 0.071021682 |

|                 |             |             |             |             |
|-----------------|-------------|-------------|-------------|-------------|
| ENSG00000155545 | 0.015122148 | 0.025352087 | 0.025317643 | 0.015233495 |
| ENSG00000204396 | 0.015848641 | 0.025609473 | 0.025486911 | 0.015536932 |
| ENSG00000136682 | 0.020873614 | 0.026865419 | 0.027672159 | 0.020474305 |
| ENSG00000108010 | 0.015405635 | 0.025546076 | 0.024399753 | 0.016234303 |
| ENSG00000159495 | 0.015629294 | 0.025378825 | 0.024642922 | 0.015214019 |
| ENSG00000119559 | 0.028249938 | 0.031516365 | 0.026424271 | 0.030749484 |
| ENSG00000106682 | 0.021583158 | 0.027672531 | 0.028453    | 0.017714886 |
| ENSG00000221954 | 0.015838589 | 0.024787475 | 0.024644031 | 0.014929188 |
| ENSG00000111775 | 0.020959239 | 0.026630401 | 0.026459409 | 0.017600014 |
| ENSG00000165487 | 0.037704386 | 0.048632198 | 0.037000882 | 0.036787437 |
| ENSG00000168876 | 0.026562549 | 0.035758164 | 0.031170675 | 0.019420479 |
| ENSG00000187456 | 0.029226904 | 0.03299121  | 0.030687862 | 0.023453487 |
| ENSG00000179826 | 0.015652927 | 0.025551326 | 0.024716908 | 0.014902275 |
| ENSG00000152642 | 0.043688062 | 0.036363206 | 0.03709466  | 0.03171328  |
| ENSG00000162398 | 0.014775067 | 0.024894186 | 0.025292811 | 0.014405126 |
| ENSG00000186007 | 0.013231618 | 0.023739884 | 0.023896568 | 0.014628989 |
| ENSG00000155755 | 0.037766864 | 0.037359602 | 0.038910549 | 0.044464008 |
| ENSG00000156973 | 0.026164047 | 0.029255507 | 0.030667613 | 0.023948794 |
| ENSG00000109113 | 0.124194536 | 0.073614938 | 0.067391669 | 0.068894894 |
| ENSG00000107949 | 0.039698398 | 0.041051928 | 0.034258335 | 0.034893336 |
| ENSG00000162076 | 0.033464771 | 0.035820115 | 0.032489121 | 0.041032979 |
| ENSG00000064932 | 0.028143138 | 0.035120748 | 0.041519125 | 0.032841365 |
| ENSG00000169717 | 0.018622949 | 0.026684005 | 0.029079231 | 0.016065961 |
| ENSG00000186090 | 0.016662777 | 0.026204563 | 0.02520687  | 0.016954084 |
| ENSG00000109255 | 0.01759871  | 0.02460317  | 0.025489531 | 0.014988495 |
| ENSG00000100941 | 0.032325193 | 0.04542945  | 0.051350837 | 0.025657765 |
| ENSG00000170458 | 0.015696379 | 0.024640911 | 0.024531805 | 0.015605476 |
| ENSG00000180488 | 0.042251525 | 0.038104343 | 0.039604477 | 0.040005333 |
| ENSG00000130545 | 0.028998289 | 0.036373172 | 0.033152823 | 0.02597714  |
| ENSG00000184005 | 0.019214255 | 0.024931215 | 0.025154051 | 0.017844819 |
| ENSG00000131115 | 0.029477139 | 0.039220806 | 0.041942164 | 0.024094842 |
| ENSG00000108825 | 0.028015983 | 0.029982327 | 0.029378433 | 0.023757561 |
| ENSG00000147869 | 0.020207218 | 0.03139903  | 0.027868331 | 0.021397633 |
| ENSG00000100461 | 0.027363538 | 0.033065161 | 0.031226508 | 0.027648304 |
| ENSG00000181045 | 0.057863465 | 0.051659585 | 0.053257474 | 0.053413935 |
| ENSG00000110848 | 0.076341778 | 0.061147329 | 0.057807704 | 0.058220146 |
| ENSG00000183576 | 0.018725057 | 0.026996122 | 0.026651894 | 0.018220666 |
| ENSG00000163618 | 0.015845935 | 0.024330135 | 0.024690291 | 0.015579995 |
| ENSG00000135912 | 0.015714204 | 0.02422803  | 0.024981767 | 0.016110345 |
| ENSG00000185739 | 0.016718    | 0.026691546 | 0.025155215 | 0.016614043 |
| ENSG00000114209 | 0.031373562 | 0.035220925 | 0.033779961 | 0.025665229 |
| ENSG00000156990 | 0.036093336 | 0.033844302 | 0.029094797 | 0.023668732 |
| ENSG00000178997 | 0.022200261 | 0.030994154 | 0.028447807 | 0.026157586 |
| ENSG00000170153 | 0.013124972 | 0.0237269   | 0.023720956 | 0.012948918 |
| ENSG00000179085 | 0.017468256 | 0.025132197 | 0.024423131 | 0.016091528 |
| ENSG00000156482 | 0.014827397 | 0.024850738 | 0.024853087 | 0.01661744  |
| ENSG00000116661 | 0.019119506 | 0.028256122 | 0.027483605 | 0.023396505 |
| ENSG00000198774 | 0.017279437 | 0.024830739 | 0.026150817 | 0.01616711  |
| ENSG00000167034 | 0.027491526 | 0.034105437 | 0.028963652 | 0.02381507  |
| ENSG00000065320 | 0.017253865 | 0.026170758 | 0.026099167 | 0.016959231 |
| ENSG00000165863 | 0.01656958  | 0.024364799 | 0.024193845 | 0.01629551  |
| ENSG00000166482 | 0.018690757 | 0.028189887 | 0.025880916 | 0.018807144 |
| ENSG00000133816 | 0.025673418 | 0.03268634  | 0.028654172 | 0.026351804 |
| ENSG00000059758 | 0.029441251 | 0.032239376 | 0.033265922 | 0.030083311 |

|                 |             |             |             |             |
|-----------------|-------------|-------------|-------------|-------------|
| ENSG0000077232  | 0.031338568 | 0.034549127 | 0.03349179  | 0.032784845 |
| ENSG00000154007 | 0.016839463 | 0.026226168 | 0.025714738 | 0.015945294 |
| ENSG00000148339 | 0.035472394 | 0.037748535 | 0.03512625  | 0.033524851 |
| ENSG00000215271 | 0.029687083 | 0.032185622 | 0.029996764 | 0.020503151 |
| ENSG00000107521 | 0.027074199 | 0.031270622 | 0.033685438 | 0.027453639 |
| ENSG00000109270 | 0.024559179 | 0.030709811 | 0.033410688 | 0.025009719 |
| ENSG00000095752 | 0.027949281 | 0.029580559 | 0.027780476 | 0.017454846 |
| ENSG00000115827 | 0.031592913 | 0.033735472 | 0.028394583 | 0.02526804  |
| ENSG00000188379 | 0.027606135 | 0.038564759 | 0.028887545 | 0.025457556 |
| ENSG00000172057 | 0.027808832 | 0.035481454 | 0.035628461 | 0.029762846 |
| ENSG00000102468 | 0.024359287 | 0.031474439 | 0.02657257  | 0.032258936 |
| ENSG00000180875 | 0.016937801 | 0.026743528 | 0.02641633  | 0.017749244 |
| ENSG00000178951 | 0.033356962 | 0.043937628 | 0.059398934 | 0.030561908 |
| ENSG00000181690 | 0.056934163 | 0.05382977  | 0.046274982 | 0.059921012 |
| ENSG00000182749 | 0.016765682 | 0.025975468 | 0.026729853 | 0.016214048 |
| ENSG00000136153 | 0.054116922 | 0.048892755 | 0.039320687 | 0.033593217 |
| ENSG00000188372 | 0.018101293 | 0.02661556  | 0.026338008 | 0.015961983 |
| ENSG00000085231 | 0.02794892  | 0.032323139 | 0.030228607 | 0.026217775 |
| ENSG00000102763 | 0.037317759 | 0.048727189 | 0.03319513  | 0.029930518 |
| ENSG00000187950 | 0.015923083 | 0.025488012 | 0.024284914 | 0.01466219  |
| ENSG00000188760 | 0.026239805 | 0.032737721 | 0.028019852 | 0.026331249 |
| ENSG00000165271 | 0.029503903 | 0.031794913 | 0.031694986 | 0.029902536 |
| ENSG00000160214 | 0.016046402 | 0.02487102  | 0.025241509 | 0.014462648 |
| ENSG00000157502 | 0.038846388 | 0.026030505 | 0.025863693 | 0.018383918 |
| ENSG00000160339 | 0.017794639 | 0.025953641 | 0.026539102 | 0.019493034 |
| ENSG00000135116 | 0.021240329 | 0.025675614 | 0.026074266 | 0.016336066 |
| ENSG00000233276 | 0.021131575 | 0.029807507 | 0.026545427 | 0.0210385   |
| ENSG00000088986 | 0.022797435 | 0.029291734 | 0.027410318 | 0.021718621 |
| ENSG00000138172 | 0.070536071 | 0.056032266 | 0.045080494 | 0.056398896 |
| ENSG00000116497 | 0.041619326 | 0.045686245 | 0.03576122  | 0.038039165 |
| ENSG00000220205 | 0.031876873 | 0.044019315 | 0.045052286 | 0.029270804 |
| ENSG00000177294 | 0.01537865  | 0.025011185 | 0.025065738 | 0.01846759  |
| ENSG00000109321 | 0.07992815  | 0.07218331  | 0.066015772 | 0.076108612 |
| ENSG00000114812 | 0.017389705 | 0.026029938 | 0.024728876 | 0.018790678 |
| ENSG00000131473 | 0.02326372  | 0.03132731  | 0.02727884  | 0.021379379 |
| ENSG00000197894 | 0.038041431 | 0.038831371 | 0.031961584 | 0.032003441 |
| ENSG00000079974 | 0.036700133 | 0.040146974 | 0.037409461 | 0.033605409 |
| ENSG00000146540 | 0.032325732 | 0.036366389 | 0.031750427 | 0.024486394 |
| ENSG00000120053 | 0.030408071 | 0.032001691 | 0.029539369 | 0.032160442 |
| ENSG00000055917 | 0.02808847  | 0.034451542 | 0.030323689 | 0.024884351 |
| ENSG00000141994 | 0.041193861 | 0.040339427 | 0.043464295 | 0.03479723  |
| ENSG00000188130 | 0.031530602 | 0.034965863 | 0.034280952 | 0.030503166 |
| ENSG00000197782 | 0.020555197 | 0.026285248 | 0.026788288 | 0.022656721 |
| ENSG00000169059 | 0.047914493 | 0.029097582 | 0.030579193 | 0.029801352 |
| ENSG00000031081 | 0.032129776 | 0.039489983 | 0.035589377 | 0.036559683 |
| ENSG00000176946 | 0.025274739 | 0.031500096 | 0.029506436 | 0.020041301 |
| ENSG00000130821 | 0.020641345 | 0.029508913 | 0.026965899 | 0.020760348 |
| ENSG00000188177 | 0.03126108  | 0.039335465 | 0.039514519 | 0.036650193 |
| ENSG00000167774 | 0.029363427 | 0.028569631 | 0.031751994 | 0.023448916 |
| ENSG00000111012 | 0.036946063 | 0.033973208 | 0.035222356 | 0.026253874 |
| ENSG00000175548 | 0.015212837 | 0.025130828 | 0.024625897 | 0.01530139  |
| ENSG00000100121 | 0.017243087 | 0.025212277 | 0.025873687 | 0.015687673 |
| ENSG00000142687 | 0.030108632 | 0.029952129 | 0.03035012  | 0.027719254 |
| ENSG00000204335 | 0.013471233 | 0.024088832 | 0.023862435 | 0.013326197 |

|                 |             |             |             |             |
|-----------------|-------------|-------------|-------------|-------------|
| ENSG00000177606 | 0.049216371 | 0.044820995 | 0.040550956 | 0.03851965  |
| ENSG00000147862 | 0.097010405 | 0.050409504 | 0.049956644 | 0.059356116 |
| ENSG00000014641 | 0.024156177 | 0.031573914 | 0.029545647 | 0.022270489 |
| ENSG00000164162 | 0.030259708 | 0.03364997  | 0.031583117 | 0.026159837 |
| ENSG00000197353 | 0.01469406  | 0.025798697 | 0.024433542 | 0.016328606 |
| ENSG00000184828 | 0.015504772 | 0.025522079 | 0.025270521 | 0.015675298 |
| ENSG00000147180 | 0.043789647 | 0.032823951 | 0.029734484 | 0.025944856 |
| ENSG00000171109 | 0.038970467 | 0.034670929 | 0.040432956 | 0.05078068  |
| ENSG00000120436 | 0.016647051 | 0.02468213  | 0.024426309 | 0.016521156 |
| ENSG00000117501 | 0.016274619 | 0.025349404 | 0.024937156 | 0.015171685 |
| ENSG00000118004 | 0.017874401 | 0.025004918 | 0.026463974 | 0.016808799 |
| ENSG00000066654 | 0.023253503 | 0.031250513 | 0.031511941 | 0.019887319 |
| ENSG00000154240 | 0.018713293 | 0.026596504 | 0.024761324 | 0.016256652 |
| ENSG00000117461 | 0.04219742  | 0.050964857 | 0.042649929 | 0.042270581 |
| ENSG00000149806 | 0.014217446 | 0.0241849   | 0.024106451 | 0.014559488 |
| ENSG00000108509 | 0.01711578  | 0.026725406 | 0.025443051 | 0.017245658 |
| ENSG00000125788 | 0.017257669 | 0.025209063 | 0.025369886 | 0.015730275 |
| ENSG00000081800 | 0.017480654 | 0.027336607 | 0.025169729 | 0.018806982 |
| ENSG00000106546 | 0.024312215 | 0.028214827 | 0.028323905 | 0.023376274 |
| ENSG00000160294 | 0.02316472  | 0.029995303 | 0.031013012 | 0.020796368 |
| ENSG00000118046 | 0.029559977 | 0.037057717 | 0.03732508  | 0.026399122 |
| ENSG00000165275 | 0.018978457 | 0.02575619  | 0.027982767 | 0.018993204 |
| ENSG00000205502 | 0.02165499  | 0.025790975 | 0.026807486 | 0.019251362 |
| ENSG00000105229 | 0.026762264 | 0.033666685 | 0.034363669 | 0.02484568  |
| ENSG00000135945 | 0.033845989 | 0.036171408 | 0.033281731 | 0.028481304 |
| ENSG00000018280 | 0.016889666 | 0.026569176 | 0.026114835 | 0.017031397 |
| ENSG00000124299 | 0.03381411  | 0.036784483 | 0.033872792 | 0.02725556  |
| ENSG00000104219 | 0.056413384 | 0.044012408 | 0.046426637 | 0.042375466 |
| ENSG00000143889 | 0.080964567 | 0.064727517 | 0.057001654 | 0.072217934 |
| ENSG00000164588 | 0.016284752 | 0.026306433 | 0.02500222  | 0.015979082 |
| ENSG00000164930 | 0.064364552 | 0.062373845 | 0.060703291 | 0.063731019 |
| ENSG00000152749 | 0.035163722 | 0.036184055 | 0.030582693 | 0.025996881 |
| ENSG00000009413 | 0.033698377 | 0.038362207 | 0.032059931 | 0.036505281 |
| ENSG00000070193 | 0.016415731 | 0.024731066 | 0.024849692 | 0.015470263 |
| ENSG00000100412 | 0.024129195 | 0.030736807 | 0.030966163 | 0.027763567 |
| ENSG00000069018 | 0.015673067 | 0.025677845 | 0.025584706 | 0.015268325 |
| ENSG00000115421 | 0.017348039 | 0.024737736 | 0.025608365 | 0.016419156 |
| ENSG00000163888 | 0.0170005   | 0.02520412  | 0.026940922 | 0.016399921 |
| ENSG00000029559 | 0.016175689 | 0.024998904 | 0.025901971 | 0.015652969 |
| ENSG00000158428 | 0.01730047  | 0.026477709 | 0.026004499 | 0.017200649 |
| ENSG00000136457 | 0.019670642 | 0.024760042 | 0.025707236 | 0.015308228 |
| ENSG00000172466 | 0.043596865 | 0.052447674 | 0.054773362 | 0.053926638 |
| ENSG00000145569 | 0.033518229 | 0.032152391 | 0.028044345 | 0.026405819 |
| ENSG00000253598 | 0.015724829 | 0.024602255 | 0.024811983 | 0.015133063 |
| ENSG00000103489 | 0.034977301 | 0.030452332 | 0.028211984 | 0.02599413  |
| ENSG00000166341 | 0.015846765 | 0.025015847 | 0.025285042 | 0.016116355 |
| ENSG00000184350 | 0.015495552 | 0.025694977 | 0.02439687  | 0.014438581 |
| ENSG00000057252 | 0.041722535 | 0.040785884 | 0.037958261 | 0.037412468 |
| ENSG00000047648 | 0.017074857 | 0.02533985  | 0.026697411 | 0.015024659 |
| ENSG00000130517 | 0.02170442  | 0.027427796 | 0.027289899 | 0.024266683 |
| ENSG00000005100 | 0.038096668 | 0.03632622  | 0.035587114 | 0.028911065 |
| ENSG00000089820 | 0.030821056 | 0.032122282 | 0.036041556 | 0.028786417 |
| ENSG00000167653 | 0.015020223 | 0.025544944 | 0.024472551 | 0.015625823 |
| ENSG00000112685 | 0.026557942 | 0.03184864  | 0.031776413 | 0.025486988 |

|                 |             |             |             |             |
|-----------------|-------------|-------------|-------------|-------------|
| ENSG00000181652 | 0.016401176 | 0.025903687 | 0.025640717 | 0.016282762 |
| ENSG00000121083 | 0.037453064 | 0.043194773 | 0.043851669 | 0.032758953 |
| ENSG00000198218 | 0.025257953 | 0.031214186 | 0.033008532 | 0.020340839 |
| ENSG00000168269 | 0.016042469 | 0.024507243 | 0.025744333 | 0.015294275 |
| ENSG00000059378 | 0.061550244 | 0.056450663 | 0.050099434 | 0.064698023 |
| ENSG00000143512 | 0.014939119 | 0.02542937  | 0.024590175 | 0.014483675 |
| ENSG00000132825 | 0.038135292 | 0.038533339 | 0.031982356 | 0.028151536 |
| ENSG00000152214 | 0.014756017 | 0.024709405 | 0.024686561 | 0.016037645 |
| ENSG00000124260 | 0.015100798 | 0.024574208 | 0.024844634 | 0.014520948 |
| ENSG00000157766 | 0.016512534 | 0.024921262 | 0.024823799 | 0.014039391 |
| ENSG00000165078 | 0.018886001 | 0.026265107 | 0.028572888 | 0.01571568  |
| ENSG00000161179 | 0.030627687 | 0.030528131 | 0.034574792 | 0.027329081 |
| ENSG00000138780 | 0.017448154 | 0.025374991 | 0.025656487 | 0.015117935 |
| ENSG00000112306 | 0.020887945 | 0.029575353 | 0.029078863 | 0.020360731 |
| ENSG00000141219 | 0.037240564 | 0.043220989 | 0.0326339   | 0.030507553 |
| ENSG00000163202 | 0.017240328 | 0.025644279 | 0.027920637 | 0.01858823  |
| ENSG00000186474 | 0.01470035  | 0.024650915 | 0.024881916 | 0.014854951 |
| ENSG00000170379 | 0.019356013 | 0.02887523  | 0.028248307 | 0.021757596 |
| ENSG00000184933 | 0.015460534 | 0.024564908 | 0.024566164 | 0.01436118  |
| ENSG00000071889 | 0.022859533 | 0.030303545 | 0.03499064  | 0.029155942 |
| ENSG00000137710 | 0.031554654 | 0.039471239 | 0.031962555 | 0.033615078 |
| ENSG00000183150 | 0.025496595 | 0.030464625 | 0.027687112 | 0.019109438 |
| ENSG00000178187 | 0.039639392 | 0.034212104 | 0.039082595 | 0.03576105  |
| ENSG00000205413 | 0.043896408 | 0.050949904 | 0.049199773 | 0.044871921 |
| ENSG00000171806 | 0.036917414 | 0.034091063 | 0.033626594 | 0.025939712 |
| ENSG00000162972 | 0.025261194 | 0.030058063 | 0.029687922 | 0.02369151  |
| ENSG00000132704 | 0.042712008 | 0.028766681 | 0.029333267 | 0.027141911 |
| ENSG00000143977 | 0.030943668 | 0.034513857 | 0.030536776 | 0.03032903  |
| ENSG00000179242 | 0.015340802 | 0.024929179 | 0.024899216 | 0.014783015 |
| ENSG00000104611 | 0.018123857 | 0.035618293 | 0.03096999  | 0.023868161 |
| ENSG00000174669 | 0.026115534 | 0.031902474 | 0.030430626 | 0.027562316 |
| ENSG00000147382 | 0.030677111 | 0.032929819 | 0.034438445 | 0.034835363 |
| ENSG00000110876 | 0.053548634 | 0.047666761 | 0.054835218 | 0.057892945 |
| ENSG00000158623 | 0.036740787 | 0.042113379 | 0.039568116 | 0.038113493 |
| ENSG00000154153 | 0.097435964 | 0.092903801 | 0.082127845 | 0.108040228 |
| ENSG00000136297 | 0.015964859 | 0.025447514 | 0.02423782  | 0.015769891 |
| ENSG00000171552 | 0.036864548 | 0.049031727 | 0.041263405 | 0.047782811 |
| ENSG00000181788 | 0.036489111 | 0.032353902 | 0.038771124 | 0.035535211 |
| ENSG00000111863 | 0.107733655 | 0.079441657 | 0.090872869 | 0.090565354 |
| ENSG00000163913 | 0.020604294 | 0.027341655 | 0.025762291 | 0.019831786 |
| ENSG00000141314 | 0.017832358 | 0.02990567  | 0.026656382 | 0.017119415 |
| ENSG00000136699 | 0.016562834 | 0.024960602 | 0.024482471 | 0.01636934  |
| ENSG00000147642 | 0.082070047 | 0.076573536 | 0.060636342 | 0.061157083 |
| ENSG00000196862 | 0.029762973 | 0.030258631 | 0.034489673 | 0.028413617 |
| ENSG00000105849 | 0.028365349 | 0.039872372 | 0.0396803   | 0.029653317 |
| ENSG00000187699 | 0.105859236 | 0.078641426 | 0.065748205 | 0.073823965 |
| ENSG00000167969 | 0.029946937 | 0.033018583 | 0.03036504  | 0.027097758 |
| ENSG00000117601 | 0.017407498 | 0.026619967 | 0.028525319 | 0.017411796 |
| ENSG00000224389 | 0.017322696 | 0.025055106 | 0.025606796 | 0.018632022 |
| ENSG00000197061 | 0.025621873 | 0.025926337 | 0.025552943 | 0.017069625 |
| ENSG00000162490 | 0.016957194 | 0.026034378 | 0.0254252   | 0.01551938  |
| ENSG00000087237 | 0.084383783 | 0.066848313 | 0.06527483  | 0.083917135 |
| ENSG00000176410 | 0.029970341 | 0.030176694 | 0.030591692 | 0.02015153  |
| ENSG00000167967 | 0.028911827 | 0.030523465 | 0.041585222 | 0.026187575 |

|                 |             |             |             |             |
|-----------------|-------------|-------------|-------------|-------------|
| ENSG00000141232 | 0.028659854 | 0.034252309 | 0.035472888 | 0.027883397 |
| ENSG00000171045 | 0.017268536 | 0.024683903 | 0.025613826 | 0.01699593  |
| ENSG00000168803 | 0.016953923 | 0.025415104 | 0.025135441 | 0.017043662 |
| ENSG00000187498 | 0.042608425 | 0.036075913 | 0.024972779 | 0.021555292 |
| ENSG00000113073 | 0.018559145 | 0.025128481 | 0.026531454 | 0.016417861 |
| ENSG00000102780 | 0.015809621 | 0.024525672 | 0.025109337 | 0.014366925 |
| ENSG00000103375 | 0.016228299 | 0.025050671 | 0.026022909 | 0.016881686 |
| ENSG00000186230 | 0.020683966 | 0.028663125 | 0.028295934 | 0.019653702 |
| ENSG00000164332 | 0.026474093 | 0.034481277 | 0.03246653  | 0.030925125 |
| ENSG00000180357 | 0.027010205 | 0.037003267 | 0.031699227 | 0.030120953 |
| ENSG00000128016 | 0.034189794 | 0.034896255 | 0.032356885 | 0.028592853 |
| ENSG00000126749 | 0.017591255 | 0.025116466 | 0.024726416 | 0.015698397 |
| ENSG00000165105 | 0.042474209 | 0.040428895 | 0.04072736  | 0.046114128 |
| ENSG00000122778 | 0.038760206 | 0.031401635 | 0.030423091 | 0.028704109 |
| ENSG00000204645 | 0.01926725  | 0.025988654 | 0.025985191 | 0.018713869 |
| ENSG00000163807 | 0.029565028 | 0.032084913 | 0.033338408 | 0.025361324 |
| ENSG00000187735 | 0.024508185 | 0.030758548 | 0.029099496 | 0.021414259 |
| ENSG00000111678 | 0.026014234 | 0.029310062 | 0.03004202  | 0.033438224 |
| ENSG00000119431 | 0.030541679 | 0.041572935 | 0.035384218 | 0.024809722 |
| ENSG00000182196 | 0.014899055 | 0.026165972 | 0.025155403 | 0.015171925 |
| ENSG00000170275 | 0.056536863 | 0.046755514 | 0.04787315  | 0.039482857 |
| ENSG00000151327 | 0.040877295 | 0.040016149 | 0.039988102 | 0.041213469 |
| ENSG00000239388 | 0.016087648 | 0.024704089 | 0.024388877 | 0.01513408  |
| ENSG00000170525 | 0.025537588 | 0.031644061 | 0.030640025 | 0.024775323 |
| ENSG00000067365 | 0.030432055 | 0.033064035 | 0.035087513 | 0.025625576 |
| ENSG00000198825 | 0.103242938 | 0.074510803 | 0.057660211 | 0.070476488 |
| ENSG00000213965 | 0.031203651 | 0.037743452 | 0.030830991 | 0.034911044 |
| ENSG00000117020 | 0.017664515 | 0.025221231 | 0.025445565 | 0.016653038 |
| ENSG00000189007 | 0.023031815 | 0.028088092 | 0.026066983 | 0.019844668 |
| ENSG00000136875 | 0.025917323 | 0.030562499 | 0.033391343 | 0.02208469  |
| ENSG00000114698 | 0.0153008   | 0.02448929  | 0.024983238 | 0.01440057  |
| ENSG00000213463 | 0.033125974 | 0.040159633 | 0.038376219 | 0.029106253 |
| ENSG00000223443 | 0.057706307 | 0.039216191 | 0.049577353 | 0.03089989  |
| ENSG00000158615 | 0.039298392 | 0.040263356 | 0.044862884 | 0.033513859 |
| ENSG00000106689 | 0.139453939 | 0.095306033 | 0.05611377  | 0.110295462 |
| ENSG00000187257 | 0.029168306 | 0.039543005 | 0.033089556 | 0.0234326   |
| ENSG00000152926 | 0.017707996 | 0.025671085 | 0.024957843 | 0.018084214 |
| ENSG00000172273 | 0.023694834 | 0.032348263 | 0.030531244 | 0.021122895 |
| ENSG00000131002 | 0.199109213 | 0.181368706 | 0.170067472 | 0.178917334 |
| ENSG00000129654 | 0.022011789 | 0.028203036 | 0.028460295 | 0.020581181 |
| ENSG00000154645 | 0.023080617 | 0.029689428 | 0.028096978 | 0.024189549 |
| ENSG00000198182 | 0.034224803 | 0.034132421 | 0.033663684 | 0.02370848  |
| ENSG00000142541 | 0.018987728 | 0.0249854   | 0.024805839 | 0.018331343 |
| ENSG00000121390 | 0.030058205 | 0.032254782 | 0.036759705 | 0.031037899 |
| ENSG00000115353 | 0.01627528  | 0.024573044 | 0.026353935 | 0.015680806 |
| ENSG00000084453 | 0.016661631 | 0.025228383 | 0.025191153 | 0.015957156 |
| ENSG00000182632 | 0.016903902 | 0.025229688 | 0.026861682 | 0.017197594 |
| ENSG00000111679 | 0.017262263 | 0.025635589 | 0.02587679  | 0.015763425 |
| ENSG00000134042 | 0.015633896 | 0.024918579 | 0.026737703 | 0.015063389 |
| ENSG00000124529 | 0.09748596  | 0.073620508 | 0.083060163 | 0.092312355 |
| ENSG00000189143 | 0.01500743  | 0.025192982 | 0.024984239 | 0.014337963 |
| ENSG00000152207 | 0.016660394 | 0.02721898  | 0.025825225 | 0.016675466 |
| ENSG00000076067 | 0.024039521 | 0.031356602 | 0.030663288 | 0.022471917 |
| ENSG00000197586 | 0.024171262 | 0.029071059 | 0.032883431 | 0.025505512 |

|                |             |             |             |             |
|----------------|-------------|-------------|-------------|-------------|
| ENSG0000023697 | 0.029493818 | 0.030606534 | 0.029391338 | 0.02592949  |
| ENSG0000083838 | 0.022616338 | 0.02632006  | 0.030337286 | 0.024980478 |
| ENSG0000134240 | 0.016273668 | 0.024386355 | 0.024865353 | 0.015685702 |
| ENSG0000155729 | 0.027037374 | 0.036846793 | 0.032442346 | 0.025166635 |
| ENSG0000110492 | 0.058595813 | 0.056667853 | 0.039713299 | 0.055777834 |
| ENSG0000175029 | 0.059857241 | 0.046817333 | 0.043166244 | 0.050478602 |
| ENSG0000182247 | 0.031523824 | 0.032243988 | 0.030888264 | 0.026409767 |
| ENSG0000109061 | 0.016294647 | 0.024172244 | 0.024621737 | 0.015914663 |
| ENSG0000040275 | 0.039146754 | 0.041975301 | 0.032234361 | 0.032939765 |
| ENSG0000120913 | 0.016901264 | 0.026731309 | 0.026111477 | 0.018217213 |
| ENSG0000130052 | 0.051728248 | 0.041011939 | 0.039323177 | 0.036016957 |
| ENSG0000146477 | 0.016026422 | 0.026085255 | 0.024834914 | 0.015781003 |
| ENSG0000136709 | 0.028256533 | 0.030179164 | 0.036365871 | 0.025807968 |
| ENSG0000203668 | 0.019220542 | 0.026181587 | 0.027271563 | 0.017612792 |
| ENSG0000183558 | 0.063610711 | 0.066647503 | 0.056950237 | 0.050559617 |
| ENSG0000183688 | 0.094790117 | 0.08111698  | 0.071946596 | 0.087660651 |
| ENSG0000176399 | 0.015546992 | 0.026044063 | 0.025250578 | 0.016649009 |
| ENSG0000198546 | 0.030893317 | 0.02991931  | 0.028568997 | 0.025640674 |
| ENSG0000234127 | 0.022994193 | 0.032367263 | 0.038280823 | 0.026255138 |
| ENSG0000132122 | 0.015056908 | 0.025039325 | 0.025225575 | 0.015570347 |
| ENSG0000054392 | 0.052149913 | 0.045784677 | 0.040404688 | 0.043344466 |
| ENSG0000171346 | 0.015531253 | 0.025058749 | 0.024057595 | 0.019113554 |
| ENSG0000160191 | 0.057596831 | 0.056253057 | 0.046322442 | 0.05425764  |
| ENSG0000182898 | 0.018631745 | 0.025498376 | 0.024615537 | 0.01697731  |
| ENSG0000170385 | 0.063057744 | 0.070345552 | 0.081155707 | 0.059654764 |
| ENSG0000104886 | 0.025891842 | 0.031891579 | 0.030848404 | 0.024761178 |
| ENSG0000105197 | 0.023013617 | 0.027950892 | 0.029778853 | 0.021042613 |
| ENSG0000165113 | 0.044529137 | 0.04297645  | 0.035852028 | 0.038459884 |
| ENSG0000213022 | 0.016106576 | 0.025701152 | 0.025875995 | 0.015353534 |
| ENSG0000095787 | 0.019311938 | 0.027529692 | 0.02807459  | 0.020443314 |
| ENSG0000144645 | 0.024299416 | 0.028022859 | 0.03405746  | 0.030690135 |
| ENSG0000127481 | 0.027566278 | 0.032000774 | 0.036535009 | 0.02758831  |
| ENSG0000141741 | 0.021756618 | 0.030608237 | 0.033247223 | 0.021547092 |
| ENSG0000145692 | 0.01583359  | 0.025457514 | 0.024621869 | 0.016919494 |
| ENSG0000182552 | 0.034132032 | 0.035981434 | 0.032143357 | 0.03179072  |
| ENSG0000215717 | 0.022837445 | 0.032616049 | 0.032381218 | 0.022316765 |
| ENSG0000187005 | 0.015744146 | 0.025122476 | 0.025633431 | 0.014954349 |
| ENSG0000175664 | 0.017233257 | 0.026314074 | 0.02448318  | 0.015826581 |
| ENSG0000107362 | 0.038954056 | 0.048274328 | 0.045266239 | 0.045379878 |
| ENSG0000144229 | 0.018657512 | 0.024779378 | 0.025506073 | 0.015131149 |
| ENSG0000163468 | 0.025743843 | 0.031367155 | 0.028235762 | 0.024580298 |
| ENSG0000106261 | 0.021332155 | 0.028189724 | 0.027616843 | 0.022932693 |
| ENSG0000183828 | 0.044519692 | 0.042107463 | 0.042166864 | 0.042315844 |
| ENSG0000143756 | 0.035249657 | 0.041872252 | 0.04198248  | 0.036015103 |
| ENSG0000172795 | 0.038147934 | 0.038927285 | 0.031035607 | 0.029908761 |
| ENSG0000102290 | 0.016935506 | 0.024675447 | 0.024997967 | 0.015229916 |
| ENSG0000196338 | 0.016528628 | 0.024862561 | 0.024713245 | 0.016337086 |
| ENSG0000124334 | 0.024335972 | 0.027807753 | 0.026597485 | 0.020514464 |
| ENSG0000101074 | 0.015526157 | 0.025500084 | 0.025217797 | 0.016607624 |
| ENSG0000250506 | 0.019394132 | 0.025556256 | 0.026744161 | 0.019247818 |
| ENSG0000112727 | 0.075478684 | 0.055714189 | 0.059065272 | 0.077978685 |
| ENSG0000138829 | 0.045193579 | 0.025951499 | 0.025465377 | 0.019636619 |
| ENSG0000177689 | 0.031310962 | 0.029944719 | 0.037037186 | 0.02954932  |
| ENSG0000119231 | 0.031678667 | 0.037528368 | 0.038603973 | 0.027165821 |

|                 |             |             |             |             |
|-----------------|-------------|-------------|-------------|-------------|
| ENSG00000140575 | 0.022721123 | 0.030553582 | 0.028952362 | 0.020102518 |
| ENSG00000140553 | 0.023310302 | 0.029956032 | 0.029824924 | 0.029815161 |
| ENSG00000115392 | 0.043808666 | 0.051463603 | 0.042952013 | 0.034174386 |
| ENSG00000127081 | 0.031935924 | 0.033504322 | 0.032178604 | 0.025701054 |
| ENSG00000165886 | 0.021198441 | 0.029015776 | 0.026283439 | 0.027169274 |
| ENSG00000204366 | 0.015756806 | 0.025085081 | 0.024818473 | 0.015234636 |
| ENSG00000244682 | 0.046185636 | 0.04735826  | 0.039381341 | 0.045473129 |
| ENSG00000182220 | 0.022710311 | 0.029664428 | 0.026712982 | 0.022460795 |
| ENSG00000113282 | 0.045806639 | 0.041722131 | 0.034107397 | 0.036454314 |
| ENSG00000088305 | 0.016499385 | 0.024334119 | 0.025785892 | 0.015966319 |
| ENSG00000173597 | 0.02028786  | 0.026413911 | 0.02412283  | 0.015699772 |
| ENSG00000095596 | 0.017904931 | 0.025082126 | 0.02511547  | 0.016936298 |
| ENSG00000138182 | 0.038078916 | 0.036478356 | 0.035776214 | 0.025034521 |
| ENSG00000174109 | 0.025641051 | 0.034314663 | 0.037137226 | 0.023892907 |
| ENSG00000215375 | 0.038854111 | 0.043217628 | 0.035560131 | 0.038448776 |
| ENSG00000103035 | 0.025747198 | 0.030302938 | 0.031918625 | 0.025404336 |
| ENSG00000007001 | 0.014245173 | 0.024464119 | 0.025349156 | 0.015706876 |
| ENSG00000183647 | 0.026098116 | 0.034960262 | 0.042535744 | 0.029898556 |
| ENSG00000243927 | 0.025727676 | 0.030343405 | 0.028819966 | 0.020507602 |
| ENSG00000185189 | 0.030257953 | 0.035517581 | 0.031610206 | 0.032436018 |
| ENSG00000157020 | 0.024788404 | 0.029555825 | 0.032657964 | 0.026326517 |
| ENSG00000173227 | 0.032394403 | 0.037930617 | 0.031709397 | 0.029182315 |
| ENSG00000092010 | 0.021540986 | 0.028132087 | 0.028536978 | 0.017418556 |
| ENSG00000179407 | 0.017426077 | 0.025242635 | 0.024625861 | 0.016660946 |
| ENSG00000178814 | 0.020586139 | 0.029857172 | 0.026647677 | 0.020294448 |
| ENSG00000185585 | 0.065748104 | 0.059683262 | 0.067441286 | 0.045516751 |
| ENSG00000186998 | 0.070143496 | 0.058058511 | 0.057197098 | 0.062626964 |
| ENSG00000185960 | 0.016191302 | 0.026830197 | 0.026232254 | 0.017500428 |
| ENSG00000006555 | 0.015419514 | 0.024780963 | 0.025977595 | 0.015459951 |
| ENSG00000111271 | 0.021552735 | 0.02808303  | 0.029922375 | 0.025031945 |
| ENSG00000164219 | 0.038694029 | 0.044825157 | 0.038351665 | 0.038660259 |
| ENSG00000148411 | 0.025228322 | 0.029046187 | 0.029561947 | 0.020685026 |
| ENSG00000196724 | 0.023366017 | 0.02892108  | 0.026469322 | 0.020416392 |
| ENSG00000002016 | 0.025044557 | 0.034370406 | 0.027609979 | 0.020900459 |
| ENSG00000234734 | 0.014435425 | 0.025079016 | 0.02413197  | 0.014414474 |
| ENSG00000100815 | 0.030671903 | 0.042244158 | 0.036999749 | 0.028646372 |
| ENSG00000167525 | 0.019132753 | 0.028885847 | 0.027529902 | 0.019843564 |
| ENSG00000167136 | 0.034544089 | 0.036886898 | 0.042328188 | 0.03402222  |
| ENSG00000183484 | 0.031700591 | 0.062725966 | 0.059321968 | 0.045835488 |
| ENSG00000134909 | 0.028527973 | 0.031194473 | 0.031109877 | 0.028104927 |
| ENSG00000124571 | 0.030383784 | 0.034391027 | 0.030347433 | 0.031757831 |
| ENSG00000123977 | 0.015197889 | 0.026697494 | 0.025056397 | 0.016725762 |
| ENSG00000171456 | 0.037175288 | 0.038016977 | 0.037116012 | 0.033443925 |
| ENSG00000120254 | 0.036751507 | 0.054622636 | 0.044415047 | 0.046417885 |
| ENSG00000132334 | 0.015775675 | 0.025154977 | 0.02465014  | 0.015718227 |
| ENSG00000174405 | 0.039901566 | 0.047698319 | 0.046866022 | 0.038377795 |
| ENSG00000141338 | 0.021510806 | 0.027602303 | 0.028728655 | 0.018896919 |
| ENSG00000108278 | 0.021243002 | 0.027840163 | 0.031111975 | 0.018827169 |
| ENSG00000099940 | 0.042865613 | 0.044734499 | 0.035532232 | 0.038809217 |
| ENSG00000008300 | 0.066471546 | 0.054299865 | 0.057579252 | 0.054215814 |
| ENSG00000130224 | 0.056985689 | 0.025149733 | 0.025613832 | 0.015918273 |
| ENSG00000176659 | 0.038725008 | 0.038106766 | 0.036243162 | 0.032731983 |
| ENSG00000184845 | 0.016617456 | 0.024316842 | 0.024624722 | 0.015927213 |
| ENSG00000137080 | 0.017364174 | 0.026308052 | 0.025143029 | 0.015178816 |



|                 |             |             |             |             |
|-----------------|-------------|-------------|-------------|-------------|
| ENSG00000116044 | 0.031550014 | 0.041398579 | 0.039172205 | 0.030814892 |
| ENSG00000182134 | 0.025271342 | 0.027784688 | 0.026413989 | 0.020204852 |
| ENSG00000168955 | 0.017602873 | 0.026980775 | 0.026047361 | 0.019396778 |
| ENSG00000147684 | 0.018998589 | 0.025241547 | 0.026043366 | 0.018469176 |
| ENSG00000063169 | 0.019428303 | 0.028006901 | 0.029153202 | 0.019256441 |
| ENSG00000060237 | 0.033192421 | 0.033968381 | 0.036088496 | 0.033185952 |
| ENSG00000169895 | 0.031418341 | 0.032526359 | 0.033013824 | 0.028206775 |
| ENSG00000196704 | 0.02737591  | 0.032708583 | 0.030721682 | 0.02594545  |
| ENSG00000173867 | 0.026820799 | 0.030614596 | 0.034774235 | 0.027039891 |
| ENSG00000159173 | 0.017317105 | 0.025726037 | 0.024434566 | 0.016324135 |
| ENSG00000213903 | 0.016947847 | 0.027935068 | 0.024900537 | 0.017164403 |
| ENSG00000213123 | 0.033520892 | 0.037638304 | 0.03473102  | 0.031025146 |
| ENSG00000137975 | 0.015309981 | 0.024512169 | 0.023864544 | 0.015602673 |
| ENSG00000064687 | 0.015128761 | 0.024320665 | 0.024043834 | 0.015588159 |
| ENSG00000063978 | 0.02462759  | 0.035902924 | 0.034124319 | 0.026912821 |
| ENSG00000247596 | 0.030458688 | 0.031683494 | 0.031134693 | 0.03121545  |
| ENSG00000164045 | 0.021208247 | 0.025122465 | 0.026444984 | 0.018546714 |
| ENSG00000141756 | 0.021056229 | 0.025951497 | 0.024051434 | 0.016613788 |
| ENSG00000133985 | 0.027403401 | 0.033698504 | 0.028188369 | 0.030412069 |
| ENSG00000125434 | 0.020765711 | 0.028401173 | 0.026439211 | 0.018893805 |
| ENSG00000164061 | 0.014864514 | 0.025831375 | 0.025131338 | 0.015939996 |
| ENSG00000197712 | 0.023967868 | 0.029869692 | 0.030125799 | 0.021624844 |
| ENSG00000172113 | 0.024336585 | 0.029166691 | 0.031841633 | 0.021520642 |
| ENSG00000196361 | 0.016437333 | 0.024422628 | 0.02648945  | 0.016388743 |
| ENSG00000169220 | 0.034403725 | 0.042696588 | 0.03601222  | 0.035650821 |
| ENSG00000185052 | 0.015236807 | 0.027640883 | 0.024692733 | 0.015348847 |
| ENSG00000070444 | 0.03137743  | 0.048654044 | 0.056982635 | 0.029849601 |
| ENSG00000018189 | 0.036721282 | 0.042211058 | 0.037582619 | 0.0326895   |
| ENSG00000149534 | 0.015862226 | 0.025397931 | 0.024264988 | 0.014970706 |
| ENSG00000213639 | 0.027310934 | 0.032828151 | 0.029456092 | 0.025467217 |
| ENSG00000198093 | 0.047025042 | 0.043868357 | 0.038760355 | 0.033691697 |
| ENSG00000099290 | 0.027113066 | 0.033173501 | 0.030669336 | 0.021624287 |
| ENSG00000178074 | 0.039119819 | 0.041080421 | 0.035630908 | 0.047492369 |
| ENSG00000140299 | 0.027219002 | 0.034969426 | 0.039666295 | 0.030374798 |
| ENSG00000169682 | 0.030460258 | 0.033396023 | 0.031817809 | 0.028719979 |
| ENSG00000147100 | 0.017472547 | 0.026898408 | 0.025845403 | 0.016792076 |
| ENSG00000123992 | 0.030531738 | 0.02896061  | 0.030586702 | 0.023905584 |
| ENSG00000107130 | 0.016869051 | 0.025424636 | 0.026034577 | 0.01679869  |
| ENSG00000105366 | 0.028685088 | 0.029400976 | 0.028176501 | 0.030554917 |
| ENSG00000151033 | 0.016444629 | 0.024966825 | 0.026634638 | 0.015156702 |
| ENSG00000146021 | 0.056880783 | 0.053483874 | 0.042737903 | 0.046799979 |
| ENSG00000126524 | 0.029963857 | 0.036810093 | 0.035983494 | 0.026617673 |
| ENSG00000170734 | 0.042223531 | 0.040802262 | 0.0418385   | 0.050233676 |
| ENSG00000122952 | 0.048913996 | 0.043662447 | 0.038573097 | 0.038401083 |
| ENSG00000122188 | 0.085382439 | 0.068512552 | 0.066516547 | 0.072236707 |
| ENSG00000170604 | 0.019783983 | 0.02698477  | 0.028965951 | 0.017436152 |
| ENSG00000197165 | 0.016259538 | 0.025613408 | 0.025240476 | 0.018105707 |
| ENSG00000180957 | 0.023678598 | 0.029319174 | 0.03012353  | 0.022421216 |
| ENSG00000179709 | 0.017150762 | 0.024655507 | 0.025044776 | 0.015976268 |
| ENSG00000124882 | 0.019585362 | 0.026353479 | 0.029974584 | 0.015529069 |
| ENSG00000100167 | 0.015072884 | 0.025863077 | 0.025020807 | 0.015866222 |
| ENSG00000067829 | 0.017800387 | 0.026939184 | 0.026328695 | 0.017201241 |
| ENSG00000141012 | 0.025300219 | 0.031820222 | 0.031340925 | 0.033014875 |
| ENSG00000187790 | 0.016533545 | 0.026202507 | 0.026060797 | 0.01931799  |

|                 |             |             |             |             |
|-----------------|-------------|-------------|-------------|-------------|
| ENSG00000147144 | 0.048053455 | 0.037537279 | 0.038457531 | 0.041290223 |
| ENSG00000084652 | 0.03014212  | 0.027693575 | 0.027567666 | 0.021575168 |
| ENSG00000163568 | 0.069767584 | 0.067935152 | 0.059732039 | 0.050302011 |
| ENSG00000172073 | 0.015644755 | 0.024942733 | 0.025689459 | 0.014746511 |
| ENSG00000133962 | 0.018250972 | 0.026040814 | 0.025639269 | 0.016859076 |
| ENSG00000163864 | 0.07708714  | 0.054918643 | 0.064325842 | 0.081195344 |
| ENSG00000173486 | 0.01835741  | 0.027476408 | 0.027338924 | 0.016854167 |
| ENSG00000128973 | 0.035153785 | 0.037819563 | 0.033847033 | 0.030607924 |
| ENSG00000116990 | 0.019130064 | 0.028167557 | 0.026729156 | 0.018117002 |
| ENSG00000159618 | 0.084897053 | 0.071025283 | 0.089589992 | 0.094341616 |
| ENSG00000166295 | 0.020924766 | 0.028291379 | 0.027939517 | 0.018638259 |
| ENSG00000090432 | 0.025966985 | 0.03724444  | 0.042275295 | 0.02986083  |
| ENSG00000121680 | 0.027038616 | 0.033492036 | 0.031674948 | 0.022324635 |
| ENSG00000120949 | 0.04496632  | 0.041707208 | 0.03704147  | 0.037674183 |
| ENSG00000167037 | 0.015594469 | 0.025105044 | 0.024747036 | 0.014757478 |
| ENSG00000103145 | 0.039055066 | 0.033445788 | 0.034738812 | 0.033252425 |
| ENSG00000147573 | 0.048374256 | 0.02905515  | 0.027887573 | 0.027622329 |
| ENSG00000026559 | 0.015380846 | 0.024978709 | 0.025261182 | 0.014654368 |
| ENSG00000105398 | 0.015159193 | 0.024635503 | 0.024362781 | 0.014389535 |
| ENSG00000126243 | 0.071914034 | 0.062595295 | 0.054130763 | 0.058393634 |
| ENSG00000140022 | 0.019085524 | 0.027038312 | 0.027700928 | 0.018814695 |
| ENSG00000186810 | 0.117075214 | 0.066626564 | 0.071799498 | 0.077468418 |
| ENSG00000182463 | 0.016465446 | 0.025499779 | 0.025152991 | 0.017415658 |
| ENSG00000108239 | 0.024481439 | 0.027263135 | 0.028484626 | 0.018787781 |
| ENSG00000151962 | 0.016671592 | 0.025088174 | 0.024375965 | 0.015306715 |
| ENSG00000078668 | 0.021014005 | 0.028271816 | 0.026689713 | 0.017668895 |
| ENSG00000090470 | 0.022167943 | 0.029785098 | 0.030085597 | 0.023711237 |
| ENSG00000165682 | 0.017148125 | 0.026587956 | 0.025416423 | 0.0157786   |
| ENSG00000171119 | 0.016953773 | 0.024855768 | 0.025686925 | 0.014659442 |
| ENSG00000103044 | 0.015033027 | 0.024406135 | 0.024329534 | 0.014705047 |
| ENSG00000175426 | 0.0156513   | 0.024801818 | 0.025871092 | 0.01525914  |
| ENSG00000197776 | 0.034888338 | 0.035621417 | 0.03201554  | 0.032149294 |
| ENSG00000111664 | 0.016764806 | 0.027640724 | 0.02558568  | 0.017332796 |
| ENSG00000095059 | 0.026090427 | 0.028521    | 0.030705695 | 0.028385289 |
| ENSG00000188493 | 0.025263485 | 0.031797472 | 0.0295931   | 0.025302575 |
| ENSG00000092094 | 0.033212919 | 0.034288883 | 0.032434409 | 0.027762003 |
| ENSG00000159307 | 0.015635529 | 0.023925548 | 0.024304825 | 0.015758192 |
| ENSG00000184584 | 0.042898201 | 0.041890065 | 0.040216642 | 0.037758448 |
| ENSG00000152315 | 0.01583511  | 0.026250212 | 0.027301376 | 0.016227516 |
| ENSG00000175895 | 0.041207323 | 0.044767004 | 0.044626054 | 0.04416799  |
| ENSG00000140057 | 0.01847924  | 0.0260108   | 0.027404849 | 0.01729368  |
| ENSG00000140067 | 0.015223654 | 0.024819595 | 0.025360813 | 0.015976394 |
| ENSG00000078043 | 0.025557373 | 0.031489597 | 0.031545995 | 0.02269542  |
| ENSG00000148218 | 0.022151579 | 0.027666121 | 0.029021657 | 0.022419941 |
| ENSG00000131149 | 0.029258713 | 0.031775048 | 0.036612971 | 0.028980452 |
| ENSG00000118961 | 0.036371567 | 0.040980108 | 0.03561025  | 0.026549059 |
| ENSG00000068438 | 0.017041238 | 0.026481665 | 0.02659883  | 0.017538833 |
| ENSG00000204065 | 0.017216751 | 0.026695823 | 0.024608227 | 0.027004666 |
| ENSG00000116288 | 0.018278648 | 0.026112825 | 0.025605254 | 0.01672842  |
| ENSG00000158246 | 0.016862255 | 0.027436988 | 0.027193053 | 0.016174054 |
| ENSG00000157538 | 0.027559027 | 0.034809687 | 0.033513898 | 0.03093662  |
| ENSG00000111432 | 0.015000067 | 0.023901727 | 0.024984395 | 0.01492326  |
| ENSG00000119699 | 0.018563693 | 0.025828754 | 0.025149722 | 0.015618154 |
| ENSG00000092978 | 0.035296043 | 0.04181077  | 0.03367707  | 0.04001172  |

|                 |             |             |             |             |
|-----------------|-------------|-------------|-------------|-------------|
| ENSG00000109072 | 0.015589356 | 0.025156756 | 0.024720687 | 0.016696341 |
| ENSG00000243543 | 0.015080267 | 0.025259832 | 0.024835965 | 0.014603424 |
| ENSG00000164591 | 0.017963055 | 0.0246422   | 0.024810418 | 0.014893313 |
| ENSG00000167881 | 0.024889469 | 0.028124681 | 0.030836189 | 0.020139472 |
| ENSG00000113108 | 0.034024462 | 0.03431438  | 0.032748834 | 0.038600852 |
| ENSG00000102265 | 0.045630094 | 0.043023208 | 0.042700005 | 0.03816963  |
| ENSG00000187758 | 0.017022901 | 0.024487438 | 0.024828501 | 0.016746599 |
| ENSG0000060709  | 0.152375573 | 0.110059917 | 0.082614657 | 0.114266587 |
| ENSG00000130726 | 0.029461823 | 0.029893081 | 0.042165729 | 0.031754206 |
| ENSG00000104490 | 0.086061682 | 0.070770828 | 0.075429142 | 0.070075419 |
| ENSG00000105393 | 0.026203059 | 0.02910937  | 0.028034078 | 0.0205666   |
| ENSG00000120075 | 0.016769181 | 0.027434623 | 0.026497074 | 0.021597043 |
| ENSG00000198691 | 0.039499251 | 0.024761427 | 0.024558762 | 0.021773273 |
| ENSG00000170099 | 0.0505505   | 0.026960597 | 0.024556651 | 0.037323996 |
| ENSG0000020922  | 0.033340646 | 0.039719961 | 0.029998371 | 0.023409957 |
| ENSG00000135577 | 0.01562687  | 0.025570762 | 0.024770817 | 0.014115754 |
| ENSG00000163817 | 0.015825792 | 0.025031973 | 0.024379321 | 0.016751866 |
| ENSG00000155719 | 0.02846199  | 0.026200334 | 0.024756103 | 0.016320992 |
| ENSG00000129667 | 0.032793294 | 0.038257027 | 0.03598878  | 0.039414766 |
| ENSG00000159556 | 0.082697987 | 0.061765526 | 0.061424333 | 0.066555289 |
| ENSG00000175265 | 0.0575396   | 0.048704336 | 0.043439794 | 0.054881257 |
| ENSG00000164674 | 0.069182541 | 0.061135415 | 0.063928614 | 0.057441541 |
| ENSG00000140044 | 0.050453613 | 0.042136    | 0.041538691 | 0.045146774 |
| ENSG00000131831 | 0.016489719 | 0.024839165 | 0.025157131 | 0.015530194 |
| ENSG00000148840 | 0.035483687 | 0.044389808 | 0.051169629 | 0.0422396   |
| ENSG00000132631 | 0.016884075 | 0.02583066  | 0.025462281 | 0.017498446 |
| ENSG00000137094 | 0.049031271 | 0.043467882 | 0.042482289 | 0.044632061 |
| ENSG00000196263 | 0.017317545 | 0.027732684 | 0.028513662 | 0.017440811 |
| ENSG00000189299 | 0.016154131 | 0.025676047 | 0.025051848 | 0.014468272 |
| ENSG00000120149 | 0.018508089 | 0.025841942 | 0.028961233 | 0.015504672 |
| ENSG00000235631 | 0.034340737 | 0.025817473 | 0.025538295 | 0.017862539 |
| ENSG00000160783 | 0.034939319 | 0.031516965 | 0.035104699 | 0.025822316 |
| ENSG00000172824 | 0.057194932 | 0.041312715 | 0.037171377 | 0.041413891 |
| ENSG00000114993 | 0.0753506   | 0.055227766 | 0.045489777 | 0.0636157   |
| ENSG00000213714 | 0.016996055 | 0.032363729 | 0.027113501 | 0.017657389 |
| ENSG00000010292 | 0.04193658  | 0.045696984 | 0.044619342 | 0.034271033 |
| ENSG00000096401 | 0.024282446 | 0.030770201 | 0.030343861 | 0.021894315 |
| ENSG00000108021 | 0.030196528 | 0.036990627 | 0.040462786 | 0.033688612 |
| ENSG00000106484 | 0.026540706 | 0.033368572 | 0.025848104 | 0.023808455 |
| ENSG00000111237 | 0.025038375 | 0.031913534 | 0.027289806 | 0.020116275 |
| ENSG00000134602 | 0.031399942 | 0.036982844 | 0.032723164 | 0.033808134 |
| ENSG00000174015 | 0.022758462 | 0.025655251 | 0.026185809 | 0.017714528 |
| ENSG00000127980 | 0.03269289  | 0.040889966 | 0.034776318 | 0.027750357 |
| ENSG00000135119 | 0.016922441 | 0.025084911 | 0.024603891 | 0.016938488 |
| ENSG00000131747 | 0.038142625 | 0.034408389 | 0.032662914 | 0.028507161 |
| ENSG00000130529 | 0.019496098 | 0.030238406 | 0.029538516 | 0.021944727 |
| ENSG00000135316 | 0.033144351 | 0.035359709 | 0.037464339 | 0.038386164 |
| ENSG00000168575 | 0.02256073  | 0.029175949 | 0.029409562 | 0.022743778 |
| ENSG00000151929 | 0.092913447 | 0.0605449   | 0.051877247 | 0.058295208 |
| ENSG00000025293 | 0.017622018 | 0.02544883  | 0.025698495 | 0.015839772 |
| ENSG00000179044 | 0.039480223 | 0.044426263 | 0.034517772 | 0.035101512 |
| ENSG00000119402 | 0.027272722 | 0.034177829 | 0.03309994  | 0.029864648 |
| ENSG00000163827 | 0.016416351 | 0.024904019 | 0.025107959 | 0.017033369 |
| ENSG00000197446 | 0.015312545 | 0.024440115 | 0.024643421 | 0.01575181  |

|                 |             |             |             |             |
|-----------------|-------------|-------------|-------------|-------------|
| ENSG00000180919 | 0.016345691 | 0.026345164 | 0.024307091 | 0.016230142 |
| ENSG00000185163 | 0.043133213 | 0.04154002  | 0.044262569 | 0.032301047 |
| ENSG00000165030 | 0.065047637 | 0.068789404 | 0.066742377 | 0.073662955 |
| ENSG0000007350  | 0.018595777 | 0.024920039 | 0.024249024 | 0.015773796 |
| ENSG00000185630 | 0.015623171 | 0.024464895 | 0.025029667 | 0.01634429  |
| ENSG00000171681 | 0.031861757 | 0.038573613 | 0.045488465 | 0.036839911 |
| ENSG00000133317 | 0.016335742 | 0.025008761 | 0.024481315 | 0.015534071 |
| ENSG00000134375 | 0.033996531 | 0.03605299  | 0.030538392 | 0.030321536 |
| ENSG00000212125 | 0.015573191 | 0.025647377 | 0.024891173 | 0.016546753 |
| ENSG00000115457 | 0.053166087 | 0.082260288 | 0.063840088 | 0.063560135 |
| ENSG00000169925 | 0.037454559 | 0.039257046 | 0.039263841 | 0.03679601  |
| ENSG00000111644 | 0.02315653  | 0.027317723 | 0.026487131 | 0.022916759 |
| ENSG00000136935 | 0.029015101 | 0.03476491  | 0.03085935  | 0.028842387 |
| ENSG00000253305 | 0.01912575  | 0.026382831 | 0.02575263  | 0.015835183 |
| ENSG00000145431 | 0.062016591 | 0.025052651 | 0.025046166 | 0.014896925 |
| ENSG00000110092 | 0.086448285 | 0.069117514 | 0.062231974 | 0.071007075 |
| ENSG00000104331 | 0.0355779   | 0.037630267 | 0.039371811 | 0.032149764 |
| ENSG00000104774 | 0.029202344 | 0.029877312 | 0.031851045 | 0.033037683 |
| ENSG00000106304 | 0.019079088 | 0.025393289 | 0.025614625 | 0.017675894 |
| ENSG00000102699 | 0.023833827 | 0.029569753 | 0.028472128 | 0.022039844 |
| ENSG00000166455 | 0.017745102 | 0.025164166 | 0.025977809 | 0.017283796 |
| ENSG00000198844 | 0.017983767 | 0.02550673  | 0.024428567 | 0.016976708 |
| ENSG00000137404 | 0.050724199 | 0.044483073 | 0.04012114  | 0.034613157 |
| ENSG00000081177 | 0.030171425 | 0.039496429 | 0.030939805 | 0.032752059 |
| ENSG00000179979 | 0.037379149 | 0.032309968 | 0.036657305 | 0.024830266 |
| ENSG00000118276 | 0.04283443  | 0.051910093 | 0.044660733 | 0.041622563 |
| ENSG00000163346 | 0.049904853 | 0.049342748 | 0.039309844 | 0.035070688 |
| ENSG00000115665 | 0.016275876 | 0.024933566 | 0.024469349 | 0.015497975 |
| ENSG00000105669 | 0.022366816 | 0.026124058 | 0.029163948 | 0.020105366 |
| ENSG00000118420 | 0.022348742 | 0.028209348 | 0.025141848 | 0.017506465 |
| ENSG00000006534 | 0.02060781  | 0.024581199 | 0.025536099 | 0.017963989 |
| ENSG00000109927 | 0.015936318 | 0.024756799 | 0.024965886 | 0.015759324 |
| ENSG00000102802 | 0.015657083 | 0.025244413 | 0.024963604 | 0.014958957 |
| ENSG00000110330 | 0.031191673 | 0.034640796 | 0.034841502 | 0.028073313 |
| ENSG00000186350 | 0.043859514 | 0.050335238 | 0.040073879 | 0.046202645 |
| ENSG00000143748 | 0.029414379 | 0.034421588 | 0.029787557 | 0.02558104  |
| ENSG00000161551 | 0.029666728 | 0.031380229 | 0.026803543 | 0.029981519 |
| ENSG00000177181 | 0.092155798 | 0.064031204 | 0.058249765 | 0.056297999 |
| ENSG00000156232 | 0.03598567  | 0.047349905 | 0.046727907 | 0.030422178 |
| ENSG00000055118 | 0.019449102 | 0.026444415 | 0.025496602 | 0.01666146  |
| ENSG00000166845 | 0.035089817 | 0.037830212 | 0.029991324 | 0.025743304 |
| ENSG00000041988 | 0.015869352 | 0.026147169 | 0.026249281 | 0.019129018 |
| ENSG00000063660 | 0.015281592 | 0.024747462 | 0.024799728 | 0.014621698 |
| ENSG00000240871 | 0.016287842 | 0.024476995 | 0.024636132 | 0.01457301  |
| ENSG00000136444 | 0.032796425 | 0.031016881 | 0.029297267 | 0.021248527 |
| ENSG00000096968 | 0.037305338 | 0.04420649  | 0.036371522 | 0.03088478  |
| ENSG00000085644 | 0.025621505 | 0.030668346 | 0.033339467 | 0.027109068 |
| ENSG00000116183 | 0.014986771 | 0.025281548 | 0.024875415 | 0.015075278 |
| ENSG00000196391 | 0.015228614 | 0.025282431 | 0.024424353 | 0.01554916  |
| ENSG00000042304 | 0.015606821 | 0.024448672 | 0.024930172 | 0.016424372 |
| ENSG00000184786 | 0.015442402 | 0.025185625 | 0.024602917 | 0.014810828 |
| ENSG00000131620 | 0.016960683 | 0.025528407 | 0.02471711  | 0.015109319 |
| ENSG00000134569 | 0.016640654 | 0.025936731 | 0.02523356  | 0.016017065 |
| ENSG00000164284 | 0.036992733 | 0.040784949 | 0.040531572 | 0.035458808 |

|                 |             |             |             |             |
|-----------------|-------------|-------------|-------------|-------------|
| ENSG00000161973 | 0.016032794 | 0.025367566 | 0.024702334 | 0.016261524 |
| ENSG00000105662 | 0.015966367 | 0.025879147 | 0.02604245  | 0.017247511 |
| ENSG00000112115 | 0.015660075 | 0.02437928  | 0.024921375 | 0.015728514 |
| ENSG00000075223 | 0.020802802 | 0.025867825 | 0.025156919 | 0.018287041 |
| ENSG00000129351 | 0.043302226 | 0.055551111 | 0.040538799 | 0.044965912 |
| ENSG00000198673 | 0.017069224 | 0.025240768 | 0.024765767 | 0.015836429 |
| ENSG00000186204 | 0.019437765 | 0.025460305 | 0.026640186 | 0.01528987  |
| ENSG00000188038 | 0.015690931 | 0.024442925 | 0.024541689 | 0.016363895 |
| ENSG00000174111 | 0.016350428 | 0.026477164 | 0.026763937 | 0.016806926 |
| ENSG00000078177 | 0.031326274 | 0.03243222  | 0.033040955 | 0.031624855 |
| ENSG00000188554 | 0.027857597 | 0.032059492 | 0.03117239  | 0.028341725 |
| ENSG00000184911 | 0.017804976 | 0.025169371 | 0.024566299 | 0.015302858 |
| ENSG00000198959 | 0.055840737 | 0.055387024 | 0.048038269 | 0.04010671  |
| ENSG00000151693 | 0.032190494 | 0.038336071 | 0.025546502 | 0.015419102 |
| ENSG00000125846 | 0.036669214 | 0.04166411  | 0.040474774 | 0.034091593 |
| ENSG00000145592 | 0.016192364 | 0.024870115 | 0.025156587 | 0.020050429 |
| ENSG00000188282 | 0.021472147 | 0.032822608 | 0.027735993 | 0.027133852 |
| ENSG00000124812 | 0.014955642 | 0.025230332 | 0.025667234 | 0.01405087  |
| ENSG00000185215 | 0.062572952 | 0.054266283 | 0.051683855 | 0.072524759 |
| ENSG00000142188 | 0.040111695 | 0.040842676 | 0.047481655 | 0.031512107 |
| ENSG00000066855 | 0.034892015 | 0.034457486 | 0.034671864 | 0.030822084 |
| ENSG00000182572 | 0.033481642 | 0.030031081 | 0.03374177  | 0.032393944 |
| ENSG00000177954 | 0.013377519 | 0.023560006 | 0.023341876 | 0.014750626 |
| ENSG00000081154 | 0.025833386 | 0.031538996 | 0.027646669 | 0.020417854 |
| ENSG00000113430 | 0.019088389 | 0.024777524 | 0.025232918 | 0.015795557 |
| ENSG00000104432 | 0.061887082 | 0.059007034 | 0.05883271  | 0.063832027 |
| ENSG00000140795 | 0.016290655 | 0.024573912 | 0.024545688 | 0.015135396 |
| ENSG00000034533 | 0.030561813 | 0.032986183 | 0.034511887 | 0.027911309 |
| ENSG00000204657 | 0.018154844 | 0.027651009 | 0.029058696 | 0.022607495 |
| ENSG00000136158 | 0.120442654 | 0.08991662  | 0.090147028 | 0.096454463 |
| ENSG00000171497 | 0.033316608 | 0.03749305  | 0.0385186   | 0.030240022 |
| ENSG00000065183 | 0.028987524 | 0.030235175 | 0.028911431 | 0.032134936 |
| ENSG00000159433 | 0.03061701  | 0.03276231  | 0.032661052 | 0.031713771 |
| ENSG00000034693 | 0.035083294 | 0.036715133 | 0.032183995 | 0.028791201 |
| ENSG00000032389 | 0.028933324 | 0.033191247 | 0.03462808  | 0.029098387 |
| ENSG00000170948 | 0.015229354 | 0.024928153 | 0.024592761 | 0.014824008 |
| ENSG00000118308 | 0.044462717 | 0.04205501  | 0.05227346  | 0.041268514 |
| ENSG00000130957 | 0.015830359 | 0.025506628 | 0.024798355 | 0.015404782 |
| ENSG00000184986 | 0.031041468 | 0.033807334 | 0.035848454 | 0.025839648 |
| ENSG00000147604 | 0.017388842 | 0.024792222 | 0.023902737 | 0.017569335 |
| ENSG00000128383 | 0.025754505 | 0.029230465 | 0.029213016 | 0.023367321 |
| ENSG00000153266 | 0.020698602 | 0.026781885 | 0.026945162 | 0.018042698 |
| ENSG00000204414 | 0.015336957 | 0.024078476 | 0.024553665 | 0.015281881 |
| ENSG00000100767 | 0.015859145 | 0.025126614 | 0.024940598 | 0.016210025 |
| ENSG00000111254 | 0.021071062 | 0.02946399  | 0.027195298 | 0.02166751  |
| ENSG00000176624 | 0.02807613  | 0.032968581 | 0.032983981 | 0.028235973 |
| ENSG00000103245 | 0.024325165 | 0.031483863 | 0.034599848 | 0.027736428 |
| ENSG00000124251 | 0.015169454 | 0.024855419 | 0.024931233 | 0.014708416 |
| ENSG00000125352 | 0.033162979 | 0.032258473 | 0.032681992 | 0.024720518 |
| ENSG00000039987 | 0.019106719 | 0.02537032  | 0.0254977   | 0.016944231 |
| ENSG00000165169 | 0.030861883 | 0.032413044 | 0.033511577 | 0.031529378 |
| ENSG00000198771 | 0.035242798 | 0.038862105 | 0.037243083 | 0.030073654 |
| ENSG00000173578 | 0.01813673  | 0.027625289 | 0.027271657 | 0.017984686 |
| ENSG00000070087 | 0.113681133 | 0.094735441 | 0.069934364 | 0.08898886  |

|                 |             |             |             |             |
|-----------------|-------------|-------------|-------------|-------------|
| ENSG00000198965 | 0.018159065 | 0.026831222 | 0.028961097 | 0.016868833 |
| ENSG00000072121 | 0.039192718 | 0.043893999 | 0.034710384 | 0.030467765 |
| ENSG00000058404 | 0.020754044 | 0.028726049 | 0.027290622 | 0.018446044 |
| ENSG00000213782 | 0.027819495 | 0.034008899 | 0.030920321 | 0.028323054 |
| ENSG00000158526 | 0.023143115 | 0.030102389 | 0.029875513 | 0.022936665 |
| ENSG00000167074 | 0.036853434 | 0.040511081 | 0.041028103 | 0.030496066 |
| ENSG00000171860 | 0.01479047  | 0.024329447 | 0.024973276 | 0.015502528 |
| ENSG00000188015 | 0.027259974 | 0.03071398  | 0.032177407 | 0.021679834 |
| ENSG00000167105 | 0.015549884 | 0.025835093 | 0.024859578 | 0.015182705 |
| ENSG00000165171 | 0.02717211  | 0.040786652 | 0.031689557 | 0.029367143 |
| ENSG00000167535 | 0.017520006 | 0.025836502 | 0.025012296 | 0.015670746 |
| ENSG00000185482 | 0.025376085 | 0.034237825 | 0.032381887 | 0.023307318 |
| ENSG00000157111 | 0.016408318 | 0.024453943 | 0.024810144 | 0.015264954 |
| ENSG00000125741 | 0.022060013 | 0.028030367 | 0.028198971 | 0.021548504 |
| ENSG00000168539 | 0.01656382  | 0.024905599 | 0.025815236 | 0.014969846 |
| ENSG00000187569 | 0.016327373 | 0.025056182 | 0.026204672 | 0.017660655 |
| ENSG00000198231 | 0.02337534  | 0.030764599 | 0.031924714 | 0.02231113  |
| ENSG00000197093 | 0.055801679 | 0.04903808  | 0.038803179 | 0.045283247 |
| ENSG00000103363 | 0.019566998 | 0.025724412 | 0.026890075 | 0.01818065  |
| ENSG00000137720 | 0.037833916 | 0.034629069 | 0.037064516 | 0.035923857 |
| ENSG00000165704 | 0.02971255  | 0.034885985 | 0.030528832 | 0.024385722 |
| ENSG00000124507 | 0.030618811 | 0.05657609  | 0.038991891 | 0.033406663 |
| ENSG00000165659 | 0.018626037 | 0.027747622 | 0.025926105 | 0.021691523 |
| ENSG00000104881 | 0.033761715 | 0.040272579 | 0.037241016 | 0.04497369  |
| ENSG00000164751 | 0.038175624 | 0.031445722 | 0.039256741 | 0.033074585 |
| ENSG00000049768 | 0.016179602 | 0.024666269 | 0.025025999 | 0.015255434 |
| ENSG00000145685 | 0.045830451 | 0.04151948  | 0.036408918 | 0.039764499 |
| ENSG00000163254 | 0.015768274 | 0.024943013 | 0.024126719 | 0.015020276 |
| ENSG00000087085 | 0.015411209 | 0.025923919 | 0.025017415 | 0.016435865 |
| ENSG00000122585 | 0.074009837 | 0.035322262 | 0.03016924  | 0.035133729 |
| ENSG00000198055 | 0.01908759  | 0.025264256 | 0.026506925 | 0.017825415 |
| ENSG00000169347 | 0.016286571 | 0.025151523 | 0.025313107 | 0.015777938 |
| ENSG00000167118 | 0.02266807  | 0.028784905 | 0.035662165 | 0.024721708 |
| ENSG00000126062 | 0.028797312 | 0.035271689 | 0.038090366 | 0.027157339 |
| ENSG00000135622 | 0.028141971 | 0.033932531 | 0.029777037 | 0.024819642 |
| ENSG00000173137 | 0.030108261 | 0.035452523 | 0.03091679  | 0.025606255 |
| ENSG00000171425 | 0.024767411 | 0.029798731 | 0.033249972 | 0.030121145 |
| ENSG00000115548 | 0.056727587 | 0.05205795  | 0.061529981 | 0.050029139 |
| ENSG00000021300 | 0.019056722 | 0.027048159 | 0.027367317 | 0.030332693 |
| ENSG00000092051 | 0.047686743 | 0.038522702 | 0.03004428  | 0.031700162 |
| ENSG00000153113 | 0.036930943 | 0.038204382 | 0.032539633 | 0.038093136 |
| ENSG00000138100 | 0.019331724 | 0.027620843 | 0.027374127 | 0.017101951 |
| ENSG00000147274 | 0.021088669 | 0.026877391 | 0.027344673 | 0.021920137 |
| ENSG00000180347 | 0.015892899 | 0.025243818 | 0.025877367 | 0.015686094 |
| ENSG00000186951 | 0.020198338 | 0.026885342 | 0.026711083 | 0.019963947 |
| ENSG00000167815 | 0.01698839  | 0.024849198 | 0.025751825 | 0.015690188 |
| ENSG00000138439 | 0.018663546 | 0.027219042 | 0.029144149 | 0.019810509 |
| ENSG00000188937 | 0.014998583 | 0.024204829 | 0.024855189 | 0.014831815 |
| ENSG00000160117 | 0.032429773 | 0.032262056 | 0.034497093 | 0.025895756 |
| ENSG00000167984 | 0.015717414 | 0.024811563 | 0.02500673  | 0.016588167 |
| ENSG00000163900 | 0.032919083 | 0.032663137 | 0.035048256 | 0.027170389 |
| ENSG00000212710 | 0.016572864 | 0.02608626  | 0.025876472 | 0.014996171 |
| ENSG00000139718 | 0.033351641 | 0.03437538  | 0.03806162  | 0.028672524 |
| ENSG00000177182 | 0.020481306 | 0.027734577 | 0.025886368 | 0.020486938 |

|                |             |             |             |             |
|----------------|-------------|-------------|-------------|-------------|
| ENSG0000060718 | 0.016776988 | 0.02526856  | 0.025182301 | 0.015553374 |
| ENSG0000074410 | 0.015743876 | 0.025391188 | 0.025090994 | 0.016345473 |
| ENSG0000164091 | 0.031159223 | 0.03216575  | 0.034685313 | 0.026907416 |
| ENSG0000182963 | 0.025037479 | 0.028751449 | 0.029116819 | 0.01891523  |
| ENSG0000181495 | 0.017138208 | 0.026396234 | 0.024958362 | 0.019014227 |
| ENSG0000168394 | 0.022203422 | 0.030220135 | 0.032514774 | 0.020736709 |
| ENSG0000153339 | 0.025459032 | 0.033633529 | 0.031378966 | 0.028391248 |
| ENSG0000168060 | 0.040539389 | 0.037817615 | 0.032590751 | 0.033036897 |
| ENSG0000115947 | 0.027636237 | 0.030018348 | 0.028467361 | 0.023719267 |
| ENSG0000107282 | 0.014729724 | 0.02504696  | 0.02365675  | 0.014943291 |
| ENSG0000212124 | 0.01521115  | 0.024821999 | 0.024815622 | 0.014399025 |
| ENSG0000106328 | 0.017961352 | 0.025625868 | 0.026106263 | 0.016806111 |
| ENSG0000111341 | 0.016808133 | 0.025322995 | 0.025787442 | 0.015794197 |
| ENSG0000083896 | 0.022475028 | 0.028927404 | 0.028656698 | 0.017372975 |
| ENSG0000162510 | 0.023641018 | 0.029584681 | 0.026677961 | 0.018356056 |
| ENSG0000049618 | 0.014660422 | 0.025219964 | 0.024704307 | 0.014621626 |
| ENSG0000131375 | 0.035649135 | 0.044213244 | 0.035501246 | 0.040023003 |
| ENSG0000147155 | 0.035694536 | 0.031594951 | 0.030954424 | 0.031077954 |
| ENSG0000130005 | 0.016266819 | 0.02526652  | 0.025344261 | 0.015538727 |
| ENSG0000117543 | 0.031666207 | 0.032709778 | 0.03244199  | 0.026719276 |
| ENSG0000141646 | 0.025457624 | 0.031982781 | 0.029236631 | 0.023685405 |
| ENSG0000145817 | 0.031786812 | 0.03217956  | 0.038915199 | 0.030482419 |
| ENSG0000170190 | 0.054823325 | 0.046893641 | 0.041441137 | 0.048261253 |
| ENSG0000221994 | 0.03653664  | 0.037225435 | 0.035860118 | 0.037070506 |
| ENSG0000010803 | 0.024757064 | 0.0291482   | 0.031625944 | 0.023295332 |
| ENSG0000140853 | 0.034445966 | 0.036946645 | 0.033979092 | 0.035466732 |
| ENSG0000006611 | 0.01691125  | 0.025773101 | 0.025888012 | 0.015610182 |
| ENSG0000105675 | 0.041173092 | 0.041262707 | 0.046588857 | 0.04495732  |
| ENSG0000107779 | 0.067230955 | 0.044009435 | 0.044329807 | 0.030761457 |
| ENSG0000186283 | 0.038530054 | 0.037033861 | 0.044218602 | 0.040837655 |
| ENSG0000102245 | 0.01693001  | 0.025425213 | 0.025169092 | 0.016277704 |
| ENSG0000182957 | 0.026283723 | 0.033993265 | 0.030014051 | 0.034804012 |
| ENSG0000104951 | 0.016323839 | 0.026113449 | 0.025746702 | 0.01602727  |
| ENSG0000182916 | 0.029982325 | 0.029182301 | 0.026763211 | 0.01963475  |
| ENSG0000084623 | 0.021512661 | 0.028085065 | 0.027336063 | 0.017448033 |
| ENSG0000090263 | 0.024249021 | 0.028841711 | 0.027413169 | 0.018501857 |
| ENSG0000169902 | 0.059606549 | 0.056902098 | 0.059070517 | 0.058431832 |
| ENSG0000138041 | 0.025643368 | 0.033893021 | 0.029217899 | 0.023291352 |
| ENSG0000073578 | 0.025321556 | 0.027893811 | 0.029362887 | 0.018432257 |
| ENSG0000139044 | 0.016486641 | 0.026377842 | 0.024212613 | 0.016407846 |
| ENSG0000165879 | 0.021698113 | 0.026328724 | 0.025632703 | 0.02016349  |
| ENSG0000081479 | 0.016263598 | 0.026114915 | 0.024644227 | 0.015234259 |
| ENSG0000019549 | 0.015512862 | 0.025644455 | 0.025684218 | 0.015224398 |
| ENSG0000134365 | 0.016457813 | 0.025251384 | 0.024479027 | 0.015212203 |
| ENSG0000242419 | 0.014767263 | 0.02487402  | 0.024263441 | 0.015046753 |
| ENSG0000101574 | 0.033725962 | 0.03438596  | 0.033875697 | 0.024078198 |
| ENSG0000196411 | 0.017351665 | 0.027245256 | 0.02770455  | 0.016487544 |
| ENSG0000167378 | 0.015843425 | 0.024900241 | 0.024797354 | 0.015104796 |
| ENSG0000170832 | 0.035930085 | 0.036268365 | 0.035855801 | 0.028849321 |
| ENSG0000119703 | 0.046831962 | 0.047503479 | 0.037568076 | 0.034066512 |
| ENSG0000125813 | 0.014771491 | 0.025158022 | 0.024463755 | 0.015260798 |
| ENSG0000180818 | 0.015176722 | 0.024203914 | 0.024150863 | 0.015720788 |
| ENSG0000111231 | 0.03287994  | 0.035861554 | 0.032905336 | 0.02523442  |
| ENSG0000174938 | 0.016639573 | 0.025416885 | 0.024347808 | 0.015511283 |

|                 |             |             |             |             |
|-----------------|-------------|-------------|-------------|-------------|
| ENSG00000185900 | 0.01557225  | 0.024471083 | 0.024783622 | 0.01556761  |
| ENSG00000240053 | 0.019153517 | 0.026493244 | 0.025952231 | 0.017100894 |
| ENSG00000154957 | 0.026113567 | 0.028197646 | 0.028803224 | 0.019939467 |
| ENSG00000183784 | 0.02003005  | 0.025740596 | 0.02716186  | 0.020051698 |
| ENSG00000172239 | 0.021786356 | 0.029187051 | 0.029748526 | 0.026287397 |
| ENSG00000072518 | 0.025760364 | 0.032510787 | 0.02999005  | 0.023983661 |
| ENSG00000125991 | 0.020660945 | 0.026066647 | 0.028448586 | 0.02498125  |
| ENSG00000213413 | 0.068640876 | 0.043327575 | 0.043585015 | 0.063805898 |
| ENSG00000197558 | 0.01810098  | 0.027267297 | 0.025105814 | 0.022702991 |
| ENSG00000171466 | 0.027900026 | 0.04113202  | 0.040515865 | 0.030510888 |
| ENSG00000131096 | 0.016026006 | 0.024358791 | 0.025142041 | 0.01606513  |
| ENSG00000163207 | 0.043097316 | 0.033730677 | 0.027013374 | 0.023046925 |
| ENSG00000044574 | 0.049000277 | 0.044145619 | 0.049672338 | 0.049230736 |
| ENSG00000242885 | 0.015154067 | 0.024748266 | 0.025843837 | 0.015602905 |
| ENSG00000080603 | 0.020318254 | 0.035807375 | 0.040866638 | 0.031377161 |
| ENSG00000048462 | 0.040555255 | 0.038835965 | 0.038374722 | 0.043293877 |
| ENSG00000131409 | 0.016039157 | 0.02603561  | 0.024986098 | 0.0153255   |
| ENSG00000151276 | 0.015659855 | 0.025023743 | 0.02448769  | 0.015227548 |
| ENSG00000234414 | 0.016574036 | 0.024288756 | 0.02594644  | 0.015785231 |
| ENSG00000073849 | 0.061259886 | 0.055986267 | 0.057058327 | 0.059938244 |
| ENSG00000116704 | 0.035633597 | 0.034663806 | 0.037360796 | 0.028907082 |
| ENSG00000173442 | 0.034086107 | 0.035504773 | 0.038527822 | 0.029623219 |
| ENSG00000125107 | 0.025397639 | 0.033829954 | 0.028521483 | 0.019901007 |
| ENSG00000136535 | 0.018820269 | 0.027240713 | 0.025559358 | 0.018867371 |
| ENSG00000184601 | 0.017416922 | 0.026472445 | 0.025862542 | 0.017856512 |
| ENSG00000165379 | 0.015844938 | 0.02515214  | 0.024261844 | 0.014912554 |
| ENSG00000119899 | 0.035369306 | 0.040095281 | 0.03829488  | 0.034671907 |
| ENSG00000118514 | 0.020590765 | 0.027822795 | 0.029160763 | 0.023407734 |
| ENSG00000048991 | 0.023879023 | 0.034312717 | 0.028262153 | 0.022328707 |
| ENSG00000174837 | 0.091564178 | 0.036250658 | 0.045079271 | 0.082238304 |
| ENSG00000096696 | 0.017526861 | 0.024724982 | 0.025097709 | 0.017504884 |
| ENSG00000161791 | 0.029970886 | 0.033236823 | 0.028865165 | 0.027281939 |
| ENSG00000102317 | 0.023336892 | 0.0280492   | 0.026915339 | 0.02834031  |
| ENSG00000162702 | 0.031397847 | 0.037631914 | 0.041317277 | 0.029978421 |
| ENSG00000165966 | 0.016346512 | 0.024921747 | 0.024481672 | 0.014653914 |
| ENSG00000180509 | 0.015186944 | 0.024539025 | 0.024549196 | 0.015458189 |
| ENSG00000184178 | 0.037955372 | 0.041202718 | 0.033819165 | 0.032970103 |
| ENSG00000204287 | 0.024260103 | 0.032227535 | 0.033561349 | 0.033968567 |
| ENSG00000148950 | 0.031431679 | 0.034571346 | 0.033456541 | 0.027369191 |
| ENSG00000074966 | 0.030960273 | 0.02963791  | 0.030045546 | 0.028921163 |
| ENSG00000088002 | 0.01584185  | 0.024518223 | 0.025887819 | 0.01558142  |
| ENSG00000204104 | 0.020390619 | 0.02794876  | 0.025940538 | 0.018909597 |
| ENSG00000090776 | 0.019579059 | 0.025421155 | 0.025151099 | 0.019378523 |
| ENSG00000075420 | 0.05641715  | 0.046117598 | 0.047234692 | 0.045562845 |
| ENSG00000184489 | 0.052033395 | 0.044805754 | 0.047442952 | 0.054547068 |
| ENSG00000171611 | 0.019097192 | 0.029427377 | 0.027615637 | 0.017686366 |
| ENSG00000133246 | 0.01734505  | 0.02703106  | 0.025781073 | 0.019944557 |
| ENSG00000112494 | 0.01697879  | 0.024625738 | 0.027722049 | 0.015195202 |
| ENSG00000180900 | 0.016873687 | 0.025114613 | 0.024892218 | 0.015224575 |
| ENSG00000147403 | 0.015195385 | 0.024158288 | 0.025495025 | 0.015627298 |
| ENSG00000086475 | 0.037759865 | 0.036714643 | 0.0324573   | 0.033003478 |
| ENSG00000104447 | 0.018800865 | 0.026479449 | 0.026391795 | 0.016149261 |
| ENSG00000155849 | 0.016447731 | 0.026052022 | 0.024877061 | 0.016679903 |
| ENSG00000144848 | 0.024653662 | 0.030291015 | 0.029410466 | 0.020023493 |



|                 |             |             |             |             |
|-----------------|-------------|-------------|-------------|-------------|
| ENSG00000123815 | 0.026155577 | 0.032412392 | 0.034113282 | 0.025404168 |
| ENSG00000164176 | 0.019742571 | 0.026778177 | 0.024910844 | 0.017895006 |
| ENSG00000161638 | 0.030274354 | 0.036729367 | 0.02842531  | 0.021678003 |
| ENSG00000144843 | 0.028915639 | 0.038701666 | 0.032209334 | 0.028408728 |
| ENSG00000122008 | 0.031880662 | 0.034035872 | 0.032205233 | 0.032037056 |
| ENSG00000100053 | 0.016601171 | 0.025659755 | 0.025138406 | 0.016122814 |
| ENSG00000171812 | 0.016442352 | 0.025440737 | 0.02512215  | 0.016440361 |
| ENSG00000161920 | 0.026855735 | 0.032197457 | 0.029834113 | 0.02758988  |
| ENSG00000010310 | 0.01910974  | 0.027138586 | 0.025860385 | 0.017600914 |
| ENSG00000183090 | 0.01865444  | 0.026822933 | 0.025922903 | 0.016980941 |
| ENSG00000161016 | 0.043081942 | 0.039963311 | 0.038952955 | 0.039524274 |
| ENSG00000174799 | 0.023423203 | 0.027909805 | 0.02923873  | 0.020782851 |
| ENSG00000165623 | 0.022746799 | 0.025206064 | 0.025694956 | 0.015628871 |
| ENSG00000109332 | 0.022077761 | 0.029366372 | 0.028771106 | 0.019146652 |
| ENSG00000114933 | 0.016406557 | 0.024696105 | 0.02488136  | 0.014491266 |
| ENSG00000115138 | 0.150433371 | 0.095029701 | 0.070833142 | 0.103683275 |
| ENSG00000150667 | 0.020202347 | 0.025607445 | 0.024474876 | 0.016180909 |
| ENSG00000111731 | 0.035680536 | 0.037890243 | 0.032307645 | 0.026355457 |
| ENSG00000184210 | 0.020616984 | 0.03521657  | 0.030574796 | 0.038180901 |
| ENSG00000187554 | 0.020305332 | 0.027472184 | 0.02522849  | 0.015953044 |
| ENSG00000101557 | 0.035692802 | 0.03538548  | 0.037340045 | 0.034173572 |
| ENSG00000138794 | 0.036323997 | 0.042616467 | 0.041641552 | 0.049933929 |
| ENSG00000152782 | 0.022176547 | 0.02769119  | 0.028637449 | 0.022276433 |
| ENSG00000134115 | 0.044081143 | 0.024629593 | 0.02429247  | 0.01573161  |
| ENSG00000160188 | 0.079041712 | 0.096006933 | 0.073060106 | 0.076219119 |
| ENSG00000171223 | 0.017323354 | 0.025522612 | 0.025935403 | 0.019520425 |
| ENSG00000140612 | 0.023449031 | 0.028971657 | 0.028677006 | 0.020093029 |
| ENSG00000149516 | 0.01661774  | 0.026297721 | 0.026058402 | 0.017066254 |
| ENSG00000132155 | 0.022700992 | 0.02879748  | 0.033305969 | 0.021733936 |
| ENSG00000129965 | 0.018786298 | 0.026203598 | 0.024689822 | 0.017285587 |
| ENSG00000124613 | 0.020086185 | 0.028365842 | 0.028676068 | 0.018412641 |
| ENSG00000163875 | 0.029382272 | 0.032228248 | 0.03188932  | 0.026208361 |
| ENSG00000148634 | 0.039062837 | 0.051507261 | 0.038085012 | 0.033012448 |
| ENSG00000136866 | 0.069033791 | 0.065299178 | 0.051658765 | 0.048271863 |
| ENSG00000116237 | 0.031231353 | 0.039366547 | 0.033131762 | 0.03511259  |
| ENSG00000167608 | 0.0165074   | 0.026747492 | 0.026295713 | 0.017908441 |
| ENSG00000170542 | 0.05943417  | 0.047005283 | 0.046433892 | 0.045449007 |
| ENSG00000188739 | 0.05350106  | 0.054618028 | 0.041285405 | 0.088762827 |
| ENSG00000130783 | 0.017412674 | 0.025278436 | 0.024483847 | 0.015839456 |
| ENSG00000145888 | 0.01653341  | 0.025384638 | 0.025218525 | 0.015912445 |
| ENSG00000213593 | 0.026515196 | 0.031197357 | 0.031880522 | 0.024851425 |
| ENSG00000204052 | 0.016576875 | 0.025613298 | 0.025268098 | 0.01661239  |
| ENSG00000074755 | 0.023944708 | 0.029467528 | 0.031925998 | 0.02332889  |
| ENSG00000160360 | 0.016453202 | 0.025297372 | 0.025772652 | 0.017152763 |
| ENSG00000215910 | 0.015135123 | 0.026095371 | 0.024774984 | 0.014769477 |
| ENSG00000108262 | 0.018641279 | 0.026150444 | 0.027679083 | 0.019069715 |
| ENSG00000180269 | 0.016229076 | 0.02446695  | 0.024972454 | 0.015347116 |
| ENSG00000104524 | 0.041295968 | 0.037166516 | 0.03668682  | 0.04140013  |
| ENSG00000115226 | 0.015764329 | 0.025991775 | 0.024647246 | 0.015846901 |
| ENSG00000116353 | 0.027977778 | 0.029495848 | 0.031609322 | 0.024955604 |
| ENSG00000169371 | 0.024461914 | 0.030349043 | 0.030674819 | 0.023226847 |
| ENSG00000147127 | 0.0166735   | 0.025108602 | 0.024525189 | 0.016054153 |
| ENSG00000163357 | 0.017204095 | 0.02477403  | 0.024971049 | 0.015466799 |
| ENSG00000106077 | 0.015974621 | 0.025387978 | 0.024777533 | 0.015278437 |

|                 |             |             |             |             |
|-----------------|-------------|-------------|-------------|-------------|
| ENSG00000159753 | 0.026923608 | 0.030389639 | 0.032004145 | 0.025903667 |
| ENSG00000140937 | 0.029606731 | 0.027464285 | 0.024901551 | 0.014040524 |
| ENSG00000158290 | 0.037950577 | 0.033785555 | 0.039708208 | 0.032631119 |
| ENSG00000160183 | 0.190544108 | 0.140837082 | 0.123842189 | 0.143582024 |
| ENSG00000168116 | 0.03120319  | 0.038188157 | 0.03426361  | 0.027988255 |
| ENSG00000134545 | 0.020153009 | 0.027087745 | 0.025037436 | 0.019205382 |
| ENSG00000136240 | 0.037889564 | 0.041195242 | 0.045789396 | 0.040754015 |
| ENSG00000122912 | 0.031527655 | 0.038442791 | 0.03357583  | 0.029388425 |
| ENSG00000151247 | 0.031502811 | 0.038716757 | 0.032017787 | 0.027072196 |
| ENSG00000188730 | 0.038198329 | 0.02663175  | 0.030309242 | 0.026057996 |
| ENSG00000167995 | 0.017104729 | 0.026084086 | 0.026911762 | 0.016639923 |
| ENSG00000184698 | 0.015031509 | 0.024527933 | 0.025110736 | 0.015643262 |
| ENSG00000021645 | 0.093189952 | 0.052176069 | 0.02905144  | 0.074128342 |
| ENSG00000155640 | 0.020492746 | 0.027645122 | 0.026804189 | 0.017942804 |
| ENSG00000181915 | 0.033389273 | 0.034940825 | 0.037187803 | 0.03140322  |
| ENSG00000109685 | 0.019580959 | 0.027387156 | 0.025299332 | 0.016995194 |
| ENSG00000165238 | 0.015287386 | 0.025118671 | 0.025410994 | 0.015253019 |
| ENSG00000152595 | 0.016260891 | 0.025269261 | 0.024828576 | 0.01600601  |
| ENSG00000133121 | 0.016538378 | 0.026041248 | 0.026076057 | 0.015639704 |
| ENSG00000137942 | 0.022792548 | 0.030387556 | 0.034120065 | 0.020766241 |
| ENSG00000215041 | 0.025922269 | 0.03166736  | 0.030325343 | 0.023310223 |
| ENSG00000105550 | 0.014695709 | 0.024428546 | 0.024472435 | 0.015574071 |
| ENSG00000165370 | 0.01517923  | 0.024911432 | 0.023946368 | 0.014713743 |
| ENSG00000159055 | 0.0394595   | 0.033533514 | 0.033400478 | 0.029254872 |
| ENSG00000119227 | 0.029327691 | 0.035515539 | 0.030357183 | 0.039467977 |
| ENSG00000107187 | 0.020181867 | 0.025740416 | 0.02537801  | 0.018822572 |
| ENSG00000168036 | 0.025358451 | 0.037952906 | 0.033753419 | 0.033793097 |
| ENSG00000144488 | 0.087016879 | 0.068918639 | 0.055891456 | 0.063457263 |
| ENSG00000066827 | 0.036362962 | 0.036062586 | 0.031847012 | 0.029129331 |
| ENSG00000124203 | 0.021517898 | 0.027754433 | 0.027288482 | 0.022766023 |
| ENSG00000169567 | 0.015596502 | 0.024708934 | 0.024595735 | 0.016914874 |
| ENSG00000184302 | 0.016773092 | 0.02448622  | 0.025381422 | 0.014569316 |
| ENSG00000123739 | 0.033682018 | 0.039620883 | 0.032514063 | 0.025211929 |
| ENSG00000157873 | 0.039136198 | 0.039590813 | 0.032580561 | 0.035106413 |
| ENSG00000147378 | 0.016463595 | 0.025365919 | 0.025120711 | 0.01529147  |
| ENSG00000112238 | 0.027533313 | 0.028781838 | 0.029927141 | 0.021533176 |
| ENSG00000164823 | 0.031279567 | 0.036110494 | 0.03279629  | 0.031101512 |
| ENSG00000185155 | 0.020383688 | 0.029380053 | 0.028251392 | 0.019771373 |
| ENSG00000183230 | 0.015989867 | 0.024121696 | 0.025021057 | 0.015910096 |
| ENSG00000198502 | 0.104196322 | 0.232441204 | 0.210916685 | 0.290062123 |
| ENSG00000177558 | 0.01823952  | 0.025938245 | 0.025545736 | 0.017789318 |
| ENSG00000014919 | 0.032961649 | 0.036606349 | 0.032838693 | 0.024228654 |
| ENSG00000160712 | 0.022609403 | 0.026214613 | 0.026327768 | 0.022432142 |
| ENSG00000146386 | 0.02858332  | 0.030300698 | 0.030366209 | 0.026747683 |
| ENSG00000170142 | 0.030972645 | 0.038120237 | 0.036269099 | 0.036872425 |
| ENSG00000169231 | 0.030000939 | 0.032970752 | 0.02920569  | 0.035672371 |
| ENSG00000140465 | 0.09099832  | 0.056630203 | 0.054360104 | 0.06061427  |
| ENSG00000124343 | 0.015084476 | 0.0267858   | 0.025321173 | 0.015138087 |
| ENSG00000168334 | 0.033868342 | 0.032816261 | 0.038733907 | 0.02388902  |
| ENSG00000128908 | 0.026633722 | 0.030243011 | 0.032019612 | 0.023988061 |
| ENSG00000198732 | 0.017577154 | 0.026381342 | 0.025530518 | 0.017230136 |
| ENSG00000166188 | 0.02504852  | 0.031386178 | 0.033864029 | 0.022696047 |
| ENSG00000182013 | 0.128557866 | 0.105524708 | 0.081576545 | 0.104223998 |
| ENSG00000135723 | 0.03516283  | 0.037634154 | 0.037975142 | 0.035242619 |

|                 |             |             |             |             |
|-----------------|-------------|-------------|-------------|-------------|
| ENSG00000205439 | 0.01661303  | 0.024907852 | 0.025791774 | 0.01531362  |
| ENSG00000027847 | 0.034968967 | 0.038373772 | 0.03619521  | 0.030272571 |
| ENSG00000159212 | 0.099137386 | 0.08406913  | 0.097165256 | 0.094978254 |
| ENSG00000147421 | 0.049556294 | 0.034449118 | 0.04507739  | 0.065846044 |
| ENSG00000136504 | 0.020459357 | 0.028841868 | 0.030981628 | 0.021029152 |
| ENSG00000163273 | 0.016788999 | 0.02568177  | 0.026816437 | 0.017074102 |
| ENSG00000129038 | 0.015353282 | 0.024069996 | 0.02429412  | 0.014978128 |
| ENSG00000204524 | 0.020627755 | 0.032498732 | 0.038178103 | 0.021364648 |
| ENSG00000186010 | 0.020958959 | 0.027276061 | 0.026217627 | 0.020053717 |
| ENSG00000077454 | 0.037148783 | 0.039134186 | 0.032463831 | 0.031266844 |
| ENSG00000178919 | 0.016963129 | 0.026482939 | 0.027272019 | 0.018479042 |
| ENSG00000117139 | 0.093195217 | 0.05431836  | 0.052110556 | 0.057495749 |
| ENSG00000132478 | 0.030288469 | 0.036100862 | 0.035138956 | 0.024722363 |
| ENSG00000109118 | 0.015127911 | 0.024785993 | 0.025292061 | 0.01503171  |
| ENSG00000185019 | 0.016034862 | 0.02548526  | 0.025535066 | 0.014542729 |
| ENSG00000166949 | 0.046978391 | 0.045099687 | 0.051973616 | 0.051260672 |
| ENSG00000147586 | 0.030428607 | 0.034349475 | 0.029897695 | 0.026160682 |
| ENSG00000128242 | 0.033873782 | 0.024866157 | 0.026152748 | 0.019838381 |
| ENSG00000143546 | 0.055265354 | 0.036961187 | 0.02452885  | 0.043136367 |
| ENSG00000182938 | 0.01502288  | 0.025279031 | 0.02470298  | 0.014878259 |
| ENSG00000180481 | 0.015743561 | 0.024906023 | 0.024320322 | 0.016660885 |
| ENSG00000180773 | 0.03723731  | 0.035269922 | 0.032995193 | 0.034020937 |
| ENSG00000135222 | 0.018754329 | 0.026927131 | 0.028176267 | 0.019008684 |
| ENSG00000100246 | 0.024007312 | 0.031334238 | 0.029141969 | 0.02685557  |
| ENSG00000104499 | 0.016128902 | 0.025417302 | 0.025390672 | 0.016431787 |
| ENSG00000165233 | 0.04187052  | 0.042567    | 0.038967093 | 0.037991587 |
| ENSG00000132842 | 0.035105569 | 0.04205681  | 0.029896366 | 0.032418828 |
| ENSG00000148362 | 0.034870363 | 0.032092532 | 0.034780817 | 0.035420999 |
| ENSG00000103342 | 0.023005686 | 0.028071308 | 0.028955004 | 0.021073435 |
| ENSG00000114395 | 0.030360234 | 0.033231728 | 0.039925515 | 0.030613124 |
| ENSG00000141086 | 0.022961797 | 0.031662291 | 0.032665169 | 0.02328658  |
| ENSG00000170779 | 0.040227295 | 0.037946554 | 0.040963798 | 0.034610703 |
| ENSG00000107719 | 0.085705056 | 0.07735479  | 0.069911541 | 0.082326839 |
| ENSG00000137806 | 0.034696699 | 0.033616895 | 0.035959855 | 0.023848275 |
| ENSG00000176925 | 0.015733767 | 0.025081727 | 0.024254476 | 0.014686993 |
| ENSG00000114902 | 0.020354853 | 0.026587021 | 0.029002597 | 0.022445724 |
| ENSG00000101605 | 0.022767149 | 0.031792    | 0.02634459  | 0.025278337 |
| ENSG00000145309 | 0.016913924 | 0.024798371 | 0.024461737 | 0.015617204 |
| ENSG00000163463 | 0.026908165 | 0.026926105 | 0.030249391 | 0.026063741 |
| ENSG00000105650 | 0.034714817 | 0.034671773 | 0.033889956 | 0.035127858 |
| ENSG00000169570 | 0.022021899 | 0.028340074 | 0.028139959 | 0.027282499 |
| ENSG00000204866 | 0.027991936 | 0.025426127 | 0.024933053 | 0.015286666 |
| ENSG00000086300 | 0.045336209 | 0.04642465  | 0.04105881  | 0.037097888 |
| ENSG00000196260 | 0.015413199 | 0.025348411 | 0.025048001 | 0.015040367 |
| ENSG00000092345 | 0.041293657 | 0.034098268 | 0.025507799 | 0.030175037 |
| ENSG00000198185 | 0.01569851  | 0.026111631 | 0.025068083 | 0.015312899 |
| ENSG00000169436 | 0.024596938 | 0.026208215 | 0.025134199 | 0.022534823 |
| ENSG00000162267 | 0.027033384 | 0.028872814 | 0.024998313 | 0.017337556 |
| ENSG00000049283 | 0.020774952 | 0.028726652 | 0.029997923 | 0.021648179 |
| ENSG00000132294 | 0.02828766  | 0.041778702 | 0.034748856 | 0.028169403 |
| ENSG00000168566 | 0.030214002 | 0.030725024 | 0.030358119 | 0.032305531 |
| ENSG00000163499 | 0.015929837 | 0.024384919 | 0.027234062 | 0.016333239 |
| ENSG00000161572 | 0.017050717 | 0.027955458 | 0.025214711 | 0.01547851  |
| ENSG00000100284 | 0.047568238 | 0.041850918 | 0.044623097 | 0.044627619 |

|                 |             |             |             |             |
|-----------------|-------------|-------------|-------------|-------------|
| ENSG0000017260  | 0.029606733 | 0.037887298 | 0.032121401 | 0.024459402 |
| ENSG00000197461 | 0.078122622 | 0.052684228 | 0.061299648 | 0.070765983 |
| ENSG00000198791 | 0.028154457 | 0.036217479 | 0.030261854 | 0.02643716  |
| ENSG00000156966 | 0.015427717 | 0.025047121 | 0.025808048 | 0.015704916 |
| ENSG00000135930 | 0.021224114 | 0.028594792 | 0.029002661 | 0.020526994 |
| ENSG00000124731 | 0.059398313 | 0.03322715  | 0.030084278 | 0.025378528 |
| ENSG00000146232 | 0.040952091 | 0.034890699 | 0.034007235 | 0.03474935  |
| ENSG00000203795 | 0.015431775 | 0.024324035 | 0.024724823 | 0.014837321 |
| ENSG00000138678 | 0.11176019  | 0.11151635  | 0.093872726 | 0.093400824 |
| ENSG00000077721 | 0.021131184 | 0.024935143 | 0.02801482  | 0.021315788 |
| ENSG00000112769 | 0.01806791  | 0.026250767 | 0.025309206 | 0.016819083 |
| ENSG00000164485 | 0.016288814 | 0.024673148 | 0.025613254 | 0.015742845 |
| ENSG00000166579 | 0.029368178 | 0.031393468 | 0.033736041 | 0.025683134 |
| ENSG00000168288 | 0.020384775 | 0.027741026 | 0.029456527 | 0.023686731 |
| ENSG00000128322 | 0.017498967 | 0.026212194 | 0.025857284 | 0.016015105 |
| ENSG00000141161 | 0.017789851 | 0.026188194 | 0.026482493 | 0.01749482  |
| ENSG00000115561 | 0.029754107 | 0.036248105 | 0.030969883 | 0.027616129 |
| ENSG00000181450 | 0.015611055 | 0.025358266 | 0.0248409   | 0.016532365 |
| ENSG00000105290 | 0.023795491 | 0.024756454 | 0.025040514 | 0.018410468 |
| ENSG00000172339 | 0.035662045 | 0.034627262 | 0.036968417 | 0.038781159 |
| ENSG00000124092 | 0.016069575 | 0.025296525 | 0.025024045 | 0.016602506 |
| ENSG00000100227 | 0.022131191 | 0.027014086 | 0.029306653 | 0.019977784 |
| ENSG00000167880 | 0.016318806 | 0.024117105 | 0.025750936 | 0.015994541 |
| ENSG00000164695 | 0.053223056 | 0.052797206 | 0.055525736 | 0.052781781 |
| ENSG00000151615 | 0.018548276 | 0.024760693 | 0.025134866 | 0.014671059 |
| ENSG00000137492 | 0.037168302 | 0.042884037 | 0.041320303 | 0.032563404 |
| ENSG00000102910 | 0.028910422 | 0.032622338 | 0.029743685 | 0.019788944 |
| ENSG00000162377 | 0.039072949 | 0.038838389 | 0.040516736 | 0.037957432 |
| ENSG00000174233 | 0.04285394  | 0.039264947 | 0.035853666 | 0.036448489 |
| ENSG00000198944 | 0.060466858 | 0.056006334 | 0.052456595 | 0.05375361  |
| ENSG00000170468 | 0.047866015 | 0.049912428 | 0.050349332 | 0.042537469 |
| ENSG00000177054 | 0.034953991 | 0.040561565 | 0.033135855 | 0.027852929 |
| ENSG00000006695 | 0.024937847 | 0.031168401 | 0.029604166 | 0.02350126  |
| ENSG00000171385 | 0.01745451  | 0.025783322 | 0.025025748 | 0.018147177 |
| ENSG00000184735 | 0.01573481  | 0.024678039 | 0.024853722 | 0.016226824 |
| ENSG00000189127 | 0.014600195 | 0.025986132 | 0.025261742 | 0.015421819 |
| ENSG00000111816 | 0.054571373 | 0.046589061 | 0.038139439 | 0.038161562 |
| ENSG00000134644 | 0.020913179 | 0.030048262 | 0.028802513 | 0.023107108 |
| ENSG00000176994 | 0.016880001 | 0.02506579  | 0.025007125 | 0.014680217 |
| ENSG00000183520 | 0.029626218 | 0.031742064 | 0.032306351 | 0.027865926 |
| ENSG00000115602 | 0.014871428 | 0.025155351 | 0.024561936 | 0.015820544 |
| ENSG00000115091 | 0.023140107 | 0.03080592  | 0.028096755 | 0.022553535 |
| ENSG00000197579 | 0.028142386 | 0.035672149 | 0.040866214 | 0.028210531 |
| ENSG00000187486 | 0.016478477 | 0.026333205 | 0.02571558  | 0.016431496 |
| ENSG00000117400 | 0.01754354  | 0.024452799 | 0.024847497 | 0.014944807 |
| ENSG00000126945 | 0.033990338 | 0.037647645 | 0.03792913  | 0.027619835 |
| ENSG00000111665 | 0.047796775 | 0.032630912 | 0.035915532 | 0.039867    |
| ENSG00000171451 | 0.014517598 | 0.024798929 | 0.025030629 | 0.014476431 |
| ENSG00000242220 | 0.021090692 | 0.026855028 | 0.028015367 | 0.01716342  |
| ENSG00000169242 | 0.042013434 | 0.031632717 | 0.028114842 | 0.026467878 |
| ENSG00000142168 | 0.021178701 | 0.028705783 | 0.027016819 | 0.019295196 |
| ENSG00000114383 | 0.025427526 | 0.036513317 | 0.039355507 | 0.024914873 |
| ENSG00000141076 | 0.029117783 | 0.028622702 | 0.031738589 | 0.028060068 |
| ENSG00000024862 | 0.02884675  | 0.0348698   | 0.037046905 | 0.029504179 |

|                 |             |             |             |             |
|-----------------|-------------|-------------|-------------|-------------|
| ENSG00000186400 | 0.016255469 | 0.025005231 | 0.026058182 | 0.015127318 |
| ENSG00000185838 | 0.047424229 | 0.043572082 | 0.037337174 | 0.03092747  |
| ENSG00000163873 | 0.017237476 | 0.025296172 | 0.024669151 | 0.017264591 |
| ENSG00000198121 | 0.062175437 | 0.050144141 | 0.027335744 | 0.02786723  |
| ENSG00000107758 | 0.022454175 | 0.029707841 | 0.027785128 | 0.019319759 |
| ENSG00000103460 | 0.074528688 | 0.055094024 | 0.026159846 | 0.017852998 |
| ENSG00000160993 | 0.021144801 | 0.030921464 | 0.030319492 | 0.019920508 |
| ENSG00000157315 | 0.019342408 | 0.028301867 | 0.027272622 | 0.018037504 |
| ENSG00000120690 | 0.023110975 | 0.030292951 | 0.029574912 | 0.018694747 |
| ENSG00000066322 | 0.026442136 | 0.029547999 | 0.033486989 | 0.026277358 |
| ENSG00000037474 | 0.024264703 | 0.033187882 | 0.033314861 | 0.02725881  |
| ENSG00000112584 | 0.028556444 | 0.035605512 | 0.032115518 | 0.023318737 |
| ENSG00000188917 | 0.025651705 | 0.02962492  | 0.027965232 | 0.021433384 |
| ENSG00000164776 | 0.016436391 | 0.025174116 | 0.024704371 | 0.015439529 |
| ENSG00000139890 | 0.029460512 | 0.032108662 | 0.0306222   | 0.027760563 |
| ENSG00000121940 | 0.02969646  | 0.02988724  | 0.033187283 | 0.026754924 |
| ENSG00000180815 | 0.014294964 | 0.024677018 | 0.023830366 | 0.015366048 |
| ENSG00000100926 | 0.029234036 | 0.031690598 | 0.03469138  | 0.029792592 |
| ENSG00000164626 | 0.086511137 | 0.071145729 | 0.050655773 | 0.071110768 |
| ENSG00000171634 | 0.015944753 | 0.025169511 | 0.02485935  | 0.016630297 |
| ENSG00000112651 | 0.029897277 | 0.041709681 | 0.037964206 | 0.043111546 |
| ENSG00000064835 | 0.015006711 | 0.025326842 | 0.025002932 | 0.015235015 |
| ENSG00000000971 | 0.017560382 | 0.026407    | 0.025670019 | 0.015393324 |
| ENSG00000162065 | 0.037418183 | 0.034817208 | 0.031354045 | 0.03118528  |
| ENSG00000065923 | 0.018956255 | 0.02759048  | 0.028053929 | 0.021494763 |
| ENSG00000151490 | 0.062096204 | 0.055060897 | 0.044560673 | 0.04758907  |
| ENSG00000104936 | 0.036877361 | 0.036625016 | 0.041237409 | 0.029536775 |
| ENSG00000158560 | 0.017192293 | 0.026170368 | 0.024401286 | 0.015900746 |
| ENSG00000138279 | 0.019377033 | 0.026017703 | 0.026621053 | 0.018516307 |
| ENSG00000163687 | 0.105297497 | 0.1136747   | 0.103738314 | 0.095369786 |
| ENSG00000151418 | 0.016667414 | 0.024987956 | 0.024622246 | 0.017610692 |
| ENSG00000172318 | 0.015887811 | 0.024228657 | 0.025330351 | 0.014316754 |
| ENSG00000182158 | 0.017656856 | 0.024892563 | 0.025547165 | 0.016103323 |
| ENSG00000184047 | 0.026991241 | 0.029983608 | 0.029056301 | 0.031456607 |
| ENSG00000161652 | 0.01575747  | 0.025135401 | 0.024712543 | 0.015234788 |
| ENSG00000165526 | 0.024362335 | 0.02959934  | 0.031665274 | 0.026194059 |
| ENSG00000163635 | 0.016492384 | 0.024653766 | 0.025444403 | 0.015018722 |
| ENSG00000153561 | 0.018482028 | 0.027495212 | 0.026077416 | 0.015745511 |
| ENSG00000153002 | 0.016439916 | 0.024670125 | 0.02604774  | 0.015419343 |
| ENSG00000065526 | 0.027917432 | 0.032750481 | 0.033906078 | 0.022804972 |
| ENSG00000173848 | 0.033275512 | 0.034769452 | 0.03741598  | 0.034651715 |
| ENSG00000051128 | 0.025219906 | 0.031121784 | 0.032362108 | 0.023932224 |
| ENSG00000179981 | 0.039025249 | 0.042324297 | 0.037398782 | 0.030955374 |
| ENSG00000089022 | 0.02506148  | 0.031181618 | 0.030114274 | 0.021729093 |
| ENSG00000197410 | 0.021951451 | 0.029880319 | 0.026494728 | 0.018856572 |
| ENSG00000146250 | 0.018305843 | 0.024667901 | 0.025489524 | 0.014975779 |
| ENSG00000112182 | 0.015309845 | 0.024741876 | 0.025224575 | 0.014804861 |
| ENSG00000204961 | 0.015638583 | 0.024715121 | 0.024667399 | 0.015081245 |
| ENSG00000137251 | 0.054769158 | 0.050423256 | 0.05454716  | 0.059428859 |
| ENSG00000128285 | 0.019409801 | 0.027165495 | 0.024982687 | 0.015770922 |
| ENSG00000112562 | 0.017650582 | 0.025109015 | 0.026425087 | 0.015012522 |
| ENSG00000166368 | 0.014811952 | 0.024627992 | 0.02478545  | 0.014283236 |
| ENSG00000146963 | 0.028183657 | 0.029394199 | 0.029503202 | 0.03190401  |
| ENSG00000164078 | 0.022763446 | 0.026824983 | 0.027801989 | 0.019080108 |

|                        |                    |                    |                    |                    |
|------------------------|--------------------|--------------------|--------------------|--------------------|
| <b>ENSG00000182923</b> | <i>0.022664691</i> | <i>0.027079061</i> | <i>0.029796434</i> | <i>0.021494136</i> |
| <b>ENSG00000131725</b> | <i>0.033833498</i> | <i>0.039670757</i> | <i>0.03377578</i>  | <i>0.028639978</i> |
| <b>ENSG00000119509</b> | <i>0.019397777</i> | <i>0.029536052</i> | <i>0.029120629</i> | <i>0.019157248</i> |

---
