# Supplementary material for: Insights into the regulation of human CNV-miRNAs from the view of their target genes
Source: PubMed Central journal article supplement (PMC3582595; doi:10.1186/1471-2164-13-707), 2012-12-18
Supplement: 1471-2164-13-707-S5.pdf [file 1471-2164-13-707-S5.pdf]

| Ensembl Gene ID | MAF of 5'UTR in YRI | MAF of 3'UTR in YRI | MAF of 5'UTR in CEU | MAF of 3'UTR in CEU | MAF of 5'UTR in CHB | MAF of 3'UTR in CHB | MAF of 5'UTR in JPT | MAF of 3'UTR in JPT |
|-----------------|---------------------|---------------------|---------------------|---------------------|---------------------|---------------------|---------------------|---------------------|
| ENSG00000256574 |                     | 0.16666667          |                     | 0.16666667          |                     |                     |                     |                     |
| ENSG00000109819 |                     | 0.46969697          |                     | 0.46969697          |                     |                     |                     | 0.4709302           |
| ENSG00000152778 |                     | 0.49085366          |                     | 0.490853659         |                     |                     |                     | 0.4593023           |
| ENSG00000161057 |                     | 0.1030303           |                     | 0.103030303         |                     |                     |                     | 0.2732558           |
| ENSG00000197969 | 0.06886228          | 0.47272727          | 0.06886228          | 0.472727273         | 0.071428571         |                     |                     | 0.3823529           |
| ENSG00000182575 |                     | 0.40555556          |                     | 0.40555556          |                     |                     |                     | 0.0909091           |
| ENSG00000138443 |                     | 0.42682927          |                     | 0.426829268         |                     |                     |                     | 0.4352941           |
| ENSG00000188906 |                     | 0.42378049          |                     | 0.423780488         |                     |                     |                     | 0.4761905           |
| ENSG00000051596 |                     | 0.25                |                     | 0.25                |                     |                     |                     | 0.2352941           |
| ENSG00000124151 | 0.09659091          | 0.32121212          | 0.09659091          | 0.321212121         |                     |                     |                     | 0.2159091           |
| ENSG00000127329 |                     | 0.44785276          |                     | 0.447852761         |                     |                     |                     | 0.4886364           |
| ENSG00000095637 |                     | 0.45426829          |                     | 0.454268293         |                     |                     |                     | 0.3953488           |
| ENSG00000172244 | 0.32335329          |                     | 0.32335329          |                     | 0.095238095         |                     | 0.1746988           |                     |
| ENSG00000189241 |                     | 0.32424242          |                     | 0.324242424         |                     |                     |                     | 0.4651163           |
| ENSG00000182511 | 0.23952096          |                     | 0.23952096          |                     |                     |                     |                     |                     |
| ENSG00000109103 |                     | 0.16666667          |                     | 0.16666667          |                     |                     |                     |                     |
| ENSG00000184361 | 0.5                 |                     | 0.5                 |                     | 0.45555556          |                     | 0.3666667           |                     |
| ENSG00000100450 |                     |                     |                     |                     |                     |                     |                     | 0.0581395           |
| ENSG00000100796 |                     | 0.44252874          |                     | 0.442528736         |                     |                     |                     | 0.4940476           |
| ENSG00000135541 | 0.17777778          | 0.46363636          | 0.17777778          | 0.463636364         | 0.272727273         |                     | 0.2073171           | 0.2848837           |
| ENSG00000258588 | 0.4491018           | 0.05757576          | 0.4491018           | 0.057575758         | 0.452380952         |                     | 0.4825581           |                     |
| ENSG00000143376 |                     | 0.35454545          |                     | 0.354545455         |                     |                     |                     | 0.3953488           |
| ENSG00000163602 |                     | 0.23636364          |                     | 0.236363636         |                     |                     |                     | 0.2209302           |
| ENSG00000048052 |                     | 0.48484848          |                     | 0.484848485         |                     |                     |                     | 0.4360465           |
| ENSG00000247270 |                     | 0.09090909          |                     | 0.090909091         |                     |                     |                     | 0.1547619           |
| ENSG00000214814 | 0.31437126          | 0.24545455          | 0.31437126          | 0.245454545         | 0.148809524         |                     | 0.0988372           | 0.4418605           |
| ENSG00000196155 | 0.2754491           | 0.10909091          | 0.2754491           | 0.109090909         |                     |                     |                     |                     |
| ENSG00000062282 | 0.45555556          | 0.10606061          | 0.45555556          | 0.106060606         | 0.233333333         |                     | 0.2727273           | 0.3139535           |
| ENSG00000006468 | 0.14772727          | 0.4                 | 0.14772727          | 0.4                 |                     |                     |                     | 0.3197674           |
| ENSG00000102174 | 0.33233533          | 0.40243902          | 0.33233533          | 0.402439024         | 0.297619048         |                     | 0.3255814           | 0.2325581           |
| ENSG00000165240 |                     | 0.26380368          |                     | 0.263803681         |                     |                     |                     | 0.3430233           |
| ENSG00000142539 |                     | 0.16111111          |                     | 0.161111111         |                     |                     |                     | 0.0795455           |
| ENSG00000180739 |                     |                     |                     |                     | 0.19047619          |                     | 0.1627907           |                     |
| ENSG00000185068 |                     | 0.278125            |                     | 0.278125            |                     |                     |                     | 0.4534884           |
| ENSG00000172172 |                     | 0.4047619           |                     | 0.404761905         |                     |                     |                     | 0.4709302           |
| ENSG00000172020 |                     | 0.30909091          |                     | 0.309090909         |                     |                     |                     | 0.1104651           |
| ENSG00000100218 | 0.31111111          |                     | 0.31111111          |                     | 0.377777778         |                     | 0.3222222           |                     |
| ENSG00000115486 |                     | 0.38888889          |                     | 0.388888889         |                     |                     |                     | 0.3111111           |
| ENSG00000100479 | 0.06927711          | 0.22865854          | 0.06927711          | 0.228658537         |                     |                     |                     |                     |
| ENSG00000196458 | 0.22155689          | 0.4969697           | 0.22155689          | 0.496969697         | 0.327380952         |                     | 0.2732558           | 0.3705882           |
| ENSG00000029639 |                     | 0.31976744          |                     | 0.319767442         |                     |                     |                     |                     |
| ENSG00000139218 | 0.14670659          |                     | 0.14670659          |                     | 0.45555556          |                     | 0.3988095           |                     |
| ENSG00000111218 | 0.15963855          | 0.12121212          | 0.15963855          | 0.121212121         |                     |                     |                     | 0.1046512           |
| ENSG00000117477 | 0.10778443          |                     | 0.10778443          |                     | 0.101190476         |                     | 0.1046512           |                     |
| ENSG00000142185 | 0.5                 |                     | 0.5                 |                     |                     |                     |                     |                     |
| ENSG00000162676 |                     | 0.32777778          |                     | 0.327777778         |                     |                     |                     | 0.1860465           |
| ENSG00000131724 | 0.48333333          | 0.13719512          | 0.48333333          | 0.137195122         | 0.446428571         |                     | 0.4886364           | 0.4825581           |
| ENSG00000183117 |                     | 0.1                 |                     | 0.1                 |                     |                     |                     |                     |
| ENSG00000164794 |                     | 0.09090909          |                     | 0.090909091         |                     |                     |                     | 0.0872093           |
| ENSG00000204823 | 0.43712575          |                     | 0.43712575          |                     | 0.322222222         |                     | 0.2674419           |                     |

|                 |            |            |            |             |             |           |            |
|-----------------|------------|------------|------------|-------------|-------------|-----------|------------|
| ENSG00000101194 |            | 0.48787879 |            | 0.487878788 |             |           | 0.2732558  |
| ENSG00000112812 |            |            |            |             |             |           | 0.06395535 |
| ENSG00000149483 | 0.11077844 | 0.14848485 | 0.11077844 | 0.148484848 |             |           |            |
| ENSG0000005884  |            | 0.29393939 |            | 0.293939394 |             |           | 0.372093   |
| ENSG00000128595 |            | 0.34848485 |            | 0.348484848 |             |           | 0.05555556 |
| ENSG00000136531 |            | 0.43888889 |            | 0.438888889 |             |           | 0.3977273  |
| ENSG00000086102 | 0.16467066 | 0.10606061 | 0.16467066 | 0.106060606 | 0.136904762 | 0.2235294 |            |
| ENSG00000140455 |            | 0.39393939 |            | 0.393939394 |             |           | 0.1022727  |
| ENSG00000100211 | 0.31666667 | 0.28181818 | 0.31666667 | 0.281818182 | 0.397727273 | 0.3522727 | 0.3117647  |
| ENSG00000175220 |            | 0.08484848 |            | 0.084848485 |             |           |            |
| ENSG00000183617 | 0.49401198 |            | 0.49401198 |             | 0.321428571 | 0.2616279 |            |
| ENSG00000186479 |            | 0.31818182 |            | 0.318181818 |             |           | 0.4360465  |
| ENSG00000188089 | 0.24251497 | 0.30606061 | 0.24251497 | 0.306060606 | 0.226190476 | 0.3255814 | 0.377907   |
| ENSG00000120029 |            | 0.36363636 |            | 0.363636364 |             |           | 0.1918605  |
| ENSG00000136161 | 0.0508982  |            | 0.0508982  |             |             |           |            |
| ENSG00000141956 |            | 0.44886364 |            | 0.448863636 |             |           | 0.45555556 |
| ENSG00000187608 | 0.29341317 |            | 0.29341317 |             |             |           |            |
| ENSG00000170561 |            | 0.23636364 |            | 0.236363636 |             |           | 0.4302326  |
| ENSG00000235935 |            |            |            |             |             |           | 0.122093   |
| ENSG00000075673 |            | 0.15757576 |            | 0.157575758 |             |           | 0.127907   |
| ENSG00000240510 |            | 0.44242424 |            | 0.442424242 |             |           | 0.3372093  |
| ENSG00000174684 | 0.23952096 |            | 0.23952096 |             | 0.154761905 | 0.1511628 |            |
| ENSG00000184661 | 0.48780488 | 0.33333333 | 0.48780488 | 0.333333333 | 0.375       | 0.3488372 | 0.2613636  |
| ENSG00000137628 | 0.21686747 |            | 0.21686747 |             | 0.12195122  | 0.122093  |            |
| ENSG00000213822 | 0.25568182 |            | 0.25568182 |             | 0.102272727 | 0.0909091 |            |
| ENSG00000167536 |            | 0.18181818 |            | 0.181818182 |             |           | 0.2093023  |
| ENSG00000085265 |            | 0.43597561 |            | 0.43597561  |             |           | 0.4534884  |
| ENSG00000090539 |            | 0.17575758 |            | 0.175757576 |             |           | 0.3294118  |
| ENSG00000107185 |            | 0.36666667 |            | 0.366666667 |             |           | 0.377907   |
| ENSG00000102805 | 0.4491018  | 0.0969697  | 0.4491018  | 0.096969697 | 0.31547619  | 0.2383721 | 0.3333333  |
| ENSG00000081052 | 0.4251497  | 0.45092025 | 0.4251497  | 0.450920245 |             |           | 0.3604651  |
| ENSG00000119314 |            | 0.43939394 |            | 0.439393939 |             |           | 0.4127907  |
| ENSG00000134757 | 0.47727273 | 0.40490798 | 0.47727273 | 0.404907975 | 0.122222222 | 0.1363636 | 0.2142857  |
| ENSG00000159259 |            | 0.10365854 |            | 0.103658537 |             |           |            |
| ENSG00000196652 | 0.26969697 | 0.15       | 0.26969697 | 0.15        | 0.355555556 | 0.2954545 | 0.2840909  |
| ENSG00000100568 |            | 0.32919255 |            | 0.329192547 |             |           | 0.3953488  |
| ENSG00000008283 |            | 0.49393939 |            | 0.493939394 |             |           | 0.2325581  |
| ENSG00000241127 |            | 0.18965517 |            | 0.189655172 |             |           | 0.1363636  |
| ENSG00000108468 |            | 0.25280899 |            | 0.252808989 |             |           | 0.2386364  |
| ENSG00000176566 |            | 0.06666667 |            | 0.066666667 |             |           |            |
| ENSG00000164114 | 0.14071856 | 0.45555556 | 0.14071856 | 0.455555556 | 0.214285714 | 0.127907  | 0.4659091  |
| ENSG00000050628 |            | 0.45555556 |            | 0.455555556 |             |           | 0.4127907  |
| ENSG00000158109 |            | 0.21646341 |            | 0.216463415 |             |           | 0.3430233  |
| ENSG00000169313 | 0.16766467 |            | 0.16766467 |             | 0.232142857 | 0.1511628 |            |
| ENSG00000054523 |            | 0.49393939 |            | 0.493939394 |             |           | 0.372093   |
| ENSG00000151136 | 0.10479042 | 0.29393939 | 0.10479042 | 0.293939394 | 0.255952381 | 0.244186  | 0.4534884  |
| ENSG00000152582 | 0.16467066 | 0.49090909 | 0.16467066 | 0.490909091 |             |           | 0.2674419  |
| ENSG00000136044 | 0.39221557 | 0.43333333 | 0.39221557 | 0.433333333 | 0.428571429 | 0.4883721 | 0.4352941  |
| ENSG00000163898 |            | 0.47878788 |            | 0.478787879 |             |           | 0.3255814  |
| ENSG00000102057 |            |            |            |             | 0.397727273 | 0.3837209 |            |
| ENSG00000189132 |            | 0.22392638 |            | 0.22392638  |             |           | 0.3095238  |
| ENSG00000130714 |            | 0.07878788 |            | 0.078787879 |             |           | 0.1058824  |
| ENSG00000155846 |            | 0.28484848 |            | 0.284848485 |             |           | 0.2151163  |
| ENSG00000113163 |            | 0.23030303 |            | 0.23030303  |             |           | 0.3837209  |

|                 |            |            |            |             |             |           |           |
|-----------------|------------|------------|------------|-------------|-------------|-----------|-----------|
| ENSG00000130349 | 0.14071856 |            | 0.14071856 |             |             |           |           |
| ENSG00000179776 | 0.23493976 | 0.41111111 | 0.23493976 | 0.41111111  | 0.154761905 | 0.1918605 | 0.1590909 |
| ENSG00000186628 |            | 0.18181818 |            | 0.181818182 |             |           | 0.4069767 |
| ENSG00000155760 |            | 0.28787879 |            | 0.287878788 |             |           | 0.2906977 |
| ENSG00000125266 |            | 0.4030303  |            | 0.403030303 |             |           | 0.4767442 |
| ENSG00000134516 | 0.31437126 | 0.33636364 | 0.31437126 | 0.336363636 | 0.148809524 | 0.2267442 | 0.4593023 |
| ENSG00000110721 |            | 0.06707317 |            | 0.067073171 |             |           | 0.1162791 |
| ENSG00000065154 |            | 0.13888889 |            | 0.138888889 |             |           | 0.0639535 |
| ENSG00000132669 |            | 0.23030303 |            | 0.23030303  |             |           | 0.2383721 |
| ENSG00000184220 |            | 0.1509434  |            | 0.150943396 |             |           | 0.0722892 |
| ENSG00000177098 |            | 0.37878788 |            | 0.378787879 |             |           | 0.3023256 |
| ENSG00000105829 |            | 0.3969697  |            | 0.396969697 |             |           | 0.4709302 |
| ENSG00000080709 |            | 0.44444444 |            | 0.444444444 | 0.147727273 | 0.0909091 | 0.2840909 |
| ENSG00000244537 |            | 0.46341463 |            | 0.463414634 | 0.083333333 |           | 0.3604651 |
| ENSG00000173039 | 0.48502994 | 0.15517241 | 0.48502994 | 0.155172414 | 0.398809524 | 0.4302326 | 0.4545455 |
| ENSG00000140829 |            | 0.48888889 |            | 0.488888889 |             |           | 0.3863636 |
| ENSG00000165985 |            | 0.45402299 |            | 0.454022989 |             |           | 0.3977273 |
| ENSG00000160111 |            | 0.49393939 |            | 0.493939394 |             |           | 0.2383721 |
| ENSG00000169026 | 0.12874251 |            | 0.12874251 |             |             |           |           |
| ENSG00000139211 |            | 0.19817073 |            | 0.198170732 |             |           | 0.3       |
| ENSG00000196220 |            | 0.33636364 |            | 0.336363636 |             |           | 0.452381  |
| ENSG00000131238 | 0.17261905 | 0.32012195 | 0.17261905 | 0.320121951 | 0.43452381  | 0.4476744 | 0.4186047 |
| ENSG00000125755 |            | 0.05151515 |            | 0.051515152 |             |           | 0.4476744 |
| ENSG00000077463 |            | 0.15555556 |            | 0.155555556 |             |           | 0.3181818 |
| ENSG00000178804 | 0.5        |            | 0.5        |             | 0.44047619  | 0.4244186 |           |
| ENSG00000138109 |            | 0.1554878  |            | 0.155487805 |             |           |           |
| ENSG00000165512 | 0.22777778 | 0.25460123 | 0.22777778 | 0.254601227 | 0.306818182 | 0.4090909 | 0.3614458 |
| ENSG00000188816 |            | 0.11515152 |            | 0.115151515 |             |           | 0.3313953 |
| ENSG00000156049 | 0.28143713 |            | 0.28143713 |             | 0.208333333 | 0.2176471 | 0.2151163 |
| ENSG00000115904 | 0.10778443 | 0.4        | 0.10778443 | 0.4         |             | 0.0581395 | 0.3197674 |
| ENSG00000043462 | 0.13888889 | 0.47222222 | 0.13888889 | 0.472222222 | 0.477777778 | 0.4659091 | 0.4111111 |
| ENSG00000099330 |            | 0.07575758 |            | 0.075757576 |             |           |           |
| ENSG00000115963 |            | 0.16358025 |            | 0.163580247 |             |           | 0.4642857 |
| ENSG00000155792 |            | 0.42727273 |            | 0.427272727 |             |           | 0.4011628 |
| ENSG00000160199 |            | 0.43636364 |            | 0.436363636 |             |           | 0.4534884 |
| ENSG00000081138 | 0.43113772 | 0.26666667 | 0.43113772 | 0.266666667 | 0.297619048 | 0.3197674 | 0.0568182 |
| ENSG00000178567 |            | 0.48780488 |            | 0.487804878 |             |           | 0.2034884 |
| ENSG00000165516 | 0.29341317 |            | 0.29341317 |             |             |           |           |
| ENSG00000141378 | 0.39772727 |            | 0.39772727 |             | 0.470238095 | 0.4593023 |           |
| ENSG00000099337 |            | 0.19090909 |            | 0.190909091 |             |           | 0.1764706 |
| ENSG00000121898 | 0.14371257 | 0.47272727 | 0.14371257 | 0.472727273 | 0.345238095 | 0.4186047 | 0.3837209 |
| ENSG00000131153 |            | 0.32926829 |            | 0.329268293 |             |           | 0.4127907 |
| ENSG00000101146 |            | 0.46590909 |            | 0.465909091 |             |           | 0.4360465 |
| ENSG00000090376 |            | 0.47256098 |            | 0.472560976 |             |           | 0.377907  |
| ENSG00000106993 |            | 0.39444444 |            | 0.394444444 |             |           | 0.4659091 |
| ENSG00000211973 | 0.20833333 |            | 0.20833333 |             | 0.422222222 | 0.4318182 |           |
| ENSG00000231213 | 0.21666667 | 0.08484848 | 0.21666667 | 0.084848485 |             |           | 0.1162791 |
| ENSG00000120242 |            | 0.05555556 |            | 0.055555556 |             |           | 0.1       |
| ENSG00000174130 |            |            |            |             |             |           | 0.2386364 |
| ENSG00000100056 |            | 0.21212121 |            | 0.212121212 |             |           | 0.2383721 |
| ENSG00000160285 |            | 0.36969697 |            | 0.36969697  |             |           | 0.2559524 |
| ENSG00000105053 | 0.42222222 | 0.21084337 | 0.42222222 | 0.210843373 | 0.204545455 | 0.2840909 | 0.3636364 |
| ENSG00000121671 |            | 0.32121212 |            | 0.321212121 |             |           | 0.4244186 |
| ENSG00000154822 | 0.35843373 | 0.22727273 | 0.35843373 | 0.227272727 | 0.464285714 | 0.4882353 |           |

|                 |            |            |            |             |             |           |           |
|-----------------|------------|------------|------------|-------------|-------------|-----------|-----------|
| ENSG00000100577 | 0.31460674 | 0.4969697  | 0.31460674 | 0.496969697 | 0.482142857 | 0.4767442 | 0.4069767 |
| ENSG00000136026 | 0.12048193 |            | 0.12048193 |             |             |           |           |
| ENSG00000133665 |            | 0.32777778 |            | 0.327777778 |             |           | 0.0681818 |
| ENSG00000100300 | 0.35628743 | 0.28220859 | 0.35628743 | 0.282208589 |             |           | 0.2093023 |
| ENSG00000134873 | 0.08682635 | 0.32121212 | 0.08682635 | 0.321212121 | 0.142857143 | 0.2034884 | 0.4588235 |
| ENSG00000145439 |            | 0.24444444 |            | 0.244444444 |             |           | 0.0930233 |
| ENSG00000134215 |            | 0.36060606 |            | 0.360606061 |             |           | 0.4825581 |
| ENSG00000243649 |            | 0.3902439  |            | 0.390243902 |             |           | 0.4127907 |
| ENSG00000258847 |            | 0.1        |            | 0.1         |             |           |           |
| ENSG00000078114 |            | 0.40909091 |            | 0.409090909 |             |           | 0.4352941 |
| ENSG00000169291 |            | 0.42424242 |            | 0.424242424 |             |           | 0.255814  |
| ENSG00000177045 |            | 0.46111111 |            | 0.461111111 |             |           | 0.2954545 |
| ENSG00000167553 |            | 0.34482759 |            | 0.344827586 |             |           | 0.2297297 |
| ENSG00000132139 |            |            |            |             |             |           | 0.2383721 |
| ENSG00000205707 | 0.43902439 | 0.49695122 | 0.43902439 | 0.49695122  | 0.160714286 | 0.0697674 | 0.1882353 |
| ENSG00000116863 | 0.05389222 |            | 0.05389222 |             | 0.220238095 | 0.1627907 | 0.0705882 |
| ENSG00000117533 |            | 0.32121212 |            | 0.321212121 |             |           | 0.2790698 |
| ENSG00000180592 | 0.23353293 |            | 0.23353293 |             |             |           |           |
| ENSG00000082258 |            | 0.38484848 |            | 0.384848485 | 0.095238095 | 0.1511628 | 0.2383721 |
| ENSG00000116062 | 0.14371257 | 0.29573171 | 0.14371257 | 0.295731707 |             |           | 0.2151163 |
| ENSG00000076344 |            | 0.09444444 |            | 0.094444444 |             |           | 0.4090909 |
| ENSG00000142279 |            | 0.26470588 |            | 0.264705882 |             |           | 0.5       |
| ENSG00000157388 | 0.38888889 | 0.10670732 | 0.38888889 | 0.106707317 | 0.06547619  |           | 0.1941176 |
| ENSG00000148300 |            | 0.05       |            | 0.05        |             |           |           |
| ENSG00000170632 |            | 0.11666667 |            | 0.116666667 |             |           | 0.3841463 |
| ENSG00000008710 |            | 0.13068182 |            | 0.130681818 |             |           |           |
| ENSG00000186577 | 0.45508982 |            | 0.45508982 |             | 0.130952381 | 0.2267442 |           |
| ENSG00000105618 | 0.09580838 |            | 0.09580838 |             | 0.25        | 0.2151163 |           |
| ENSG00000197943 |            | 0.06060606 |            | 0.060606061 |             |           |           |
| ENSG00000214367 |            | 0.1097561  |            | 0.109756098 |             |           | 0.3081395 |
| ENSG00000082556 | 0.06321839 | 0.14545455 | 0.06321839 | 0.145454545 |             |           | 0.0697674 |
| ENSG00000156050 |            | 0.12727273 |            | 0.127272727 |             |           | 0.4666667 |
| ENSG00000154222 |            | 0.46646341 |            | 0.466463415 |             |           | 0.1162791 |
| ENSG00000006114 |            | 0.36060606 |            | 0.360606061 |             |           | 0.4       |
| ENSG00000188419 |            | 0.2484472  |            | 0.248447205 |             |           | 0.1785714 |
| ENSG00000184156 |            | 0.49393939 |            | 0.493939394 |             |           | 0.3372093 |
| ENSG00000047315 | 0.13772455 |            | 0.13772455 |             |             |           |           |
| ENSG00000078124 | 0.40963855 | 0.41818182 | 0.40963855 | 0.418181818 | 0.347560976 | 0.2941176 | 0.4069767 |
| ENSG00000150403 |            | 0.18012422 |            | 0.180124224 |             |           | 0.1829268 |
| ENSG00000171824 |            | 0.24242424 |            | 0.242424242 |             |           | 0.1395349 |
| ENSG00000128881 |            |            |            |             | 0.422619048 | 0.4360465 |           |
| ENSG00000164291 |            | 0.14939024 |            | 0.149390244 |             |           | 0.1918605 |
| ENSG00000126785 | 0.44311377 | 0.3117284  | 0.44311377 | 0.311728395 | 0.494047619 | 0.4352941 | 0.2380952 |
| ENSG00000143217 |            | 0.27777778 |            | 0.277777778 |             |           | 0.0872093 |
| ENSG00000106714 |            | 0.28333333 |            | 0.283333333 |             |           | 0.3522727 |
| ENSG00000115159 |            | 0.28333333 |            | 0.283333333 |             |           | 0.2613636 |
| ENSG00000162636 |            | 0.05       |            | 0.05        |             |           | 0.1818182 |
| ENSG00000156675 |            | 0.26666667 |            | 0.266666667 |             |           | 0.0639535 |
| ENSG00000196176 |            | 0.10909091 |            | 0.109090909 |             |           |           |
| ENSG00000044115 |            | 0.29090909 |            | 0.290909091 |             |           |           |
| ENSG00000146109 |            | 0.11515152 |            | 0.115151515 |             |           | 0.0697674 |
| ENSG00000215570 |            | 0.28888889 |            | 0.288888889 |             |           |           |
| ENSG00000169946 | 0.08982036 |            | 0.08982036 |             | 0.130952381 | 0.1470588 |           |
| ENSG00000135966 |            | 0.2969697  |            | 0.296969697 | 0.125       | 0.1686047 | 0.4666667 |

|                 |            |            |            |             |             |           |           |
|-----------------|------------|------------|------------|-------------|-------------|-----------|-----------|
| ENSG00000138944 | 0.16666667 | 0.31609195 | 0.16666667 | 0.316091954 |             |           | 0.4888889 |
| ENSG00000186714 | 0.28742515 | 0.27878788 | 0.28742515 | 0.278787879 | 0.240963855 | 0.2034884 | 0.0823529 |
| ENSG00000088766 |            | 0.49090909 |            | 0.490909091 |             |           | 0.452381  |
| ENSG00000130700 |            | 0.23312883 |            | 0.233128834 |             |           | 0.0755814 |
| ENSG00000169006 |            | 0.15       |            | 0.15        |             |           | 0.0568182 |
| ENSG00000100196 |            | 0.31818182 |            | 0.318181818 |             |           | 0.3837209 |
| ENSG00000143921 |            |            |            |             | 0.155555556 | 0.2222222 |           |
| ENSG00000110987 |            | 0.23333333 |            | 0.233333333 | 0.226190476 | 0.1802326 | 0.1860465 |
| ENSG00000251201 |            | 0.49393939 |            | 0.493939394 |             |           | 0.4709302 |
| ENSG00000114480 | 0.28353659 | 0.45402299 | 0.28353659 | 0.454022989 | 0.444444444 | 0.375     | 0.127907  |
| ENSG00000089041 | 0.3        | 0.45757576 | 0.3        | 0.457575758 | 0.333333333 | 0.4418605 | 0.4418605 |
| ENSG00000144791 | 0.30113636 | 0.43209877 | 0.30113636 | 0.432098765 | 0.344444444 | 0.3636364 | 0.2325581 |
| ENSG00000155189 |            | 0.26086957 |            | 0.260869565 |             |           | 0.3197674 |
| ENSG00000234511 | 0.29341317 | 0.46969697 | 0.29341317 | 0.46969697  | 0.130952381 | 0.1453488 | 0.4825581 |
| ENSG00000080573 |            | 0.33128834 |            | 0.331288344 |             |           | 0.1744186 |
| ENSG00000151079 | 0.4011976  | 0.38787879 | 0.4011976  | 0.387878788 | 0.482142857 | 0.4647059 | 0.4709302 |
| ENSG00000145362 | 0.07303371 | 0.13333333 | 0.07303371 | 0.133333333 |             |           |           |
| ENSG00000198211 |            | 0.07878788 |            | 0.078787879 |             |           |           |
| ENSG00000183060 |            | 0.42941176 |            | 0.429411765 |             |           | 0.4186047 |
| ENSG00000135898 |            | 0.31515152 |            | 0.315151515 |             |           | 0.3255814 |
| ENSG00000143457 |            | 0.4054878  |            | 0.405487805 |             |           | 0.2383721 |
| ENSG00000130270 | 0.35542169 | 0.48787879 | 0.35542169 | 0.487878788 | 0.386904762 | 0.4642857 | 0.4767442 |
| ENSG00000117595 | 0.47590361 | 0.26060606 | 0.47590361 | 0.260606061 | 0.363095238 | 0.4069767 | 0.4825581 |
| ENSG00000132612 |            | 0.06363636 |            | 0.063636364 |             |           |           |
| ENSG00000174332 |            | 0.05       |            | 0.05        |             |           | 0.1136364 |
| ENSG00000100557 | 0.18373494 | 0.3        | 0.18373494 | 0.3         |             |           | 0.054878  |
| ENSG00000163481 | 0.43413174 |            | 0.43413174 |             | 0.142857143 | 0.1569767 | 0.1363636 |
| ENSG00000132185 | 0.4760479  |            | 0.4760479  |             | 0.19047619  | 0.2325581 |           |
| ENSG00000214226 |            | 0.17987805 |            | 0.179878049 | 0.077380952 |           |           |
| ENSG00000176142 | 0.0748503  | 0.13636364 | 0.0748503  | 0.136363636 | 0.083333333 | 0.1046512 | 0.2647059 |
| ENSG00000073614 |            | 0.20909091 |            | 0.209090909 |             |           | 0.5       |
| ENSG00000180979 | 0.15868263 | 0.07012195 | 0.15868263 | 0.070121951 |             |           |           |
| ENSG00000141759 | 0.40229885 | 0.3030303  | 0.40229885 | 0.303030303 | 0.088888889 | 0.0681818 | 0.4651163 |
| ENSG00000164402 |            | 0.125      |            | 0.125       |             |           | 0.3953488 |
| ENSG00000198892 |            | 0.36627907 |            | 0.36627907  |             |           | 0.4404762 |
| ENSG00000116785 | 0.15168539 | 0.21428571 | 0.15168539 | 0.214285714 | 0.477777778 | 0.4886364 | 0.4702381 |
| ENSG00000125633 |            | 0.38181818 |            | 0.381818182 |             |           | 0.2848837 |
| ENSG00000145012 | 0.31460674 | 0.49090909 | 0.31460674 | 0.490909091 | 0.433333333 | 0.3409091 | 0.4939759 |
| ENSG00000178585 |            | 0.25280899 |            | 0.252808989 |             |           | 0.1046512 |
| ENSG00000182359 | 0.18263473 | 0.33647799 | 0.18263473 | 0.336477987 |             | 0.0523256 | 0.4127907 |
| ENSG00000205702 |            |            |            |             |             | 0.05      |           |
| ENSG00000162931 | 0.09756098 |            | 0.09756098 |             | 0.303571429 | 0.1860465 |           |
| ENSG00000253138 |            | 0.07777778 |            | 0.077777778 |             |           |           |
| ENSG00000164483 | 0.06586826 | 0.13939394 | 0.06586826 | 0.139393939 | 0.410714286 | 0.4545455 | 0.0697674 |
| ENSG00000077312 |            | 0.10606061 |            | 0.106060606 | 0.196428571 | 0.2848837 | 0.2848837 |
| ENSG00000168671 | 0.20625    |            | 0.20625    |             |             |           | 0.0647059 |
| ENSG00000145022 |            | 0.27575758 |            | 0.275757576 |             |           | 0.1162791 |
| ENSG00000132275 |            | 0.46363636 |            | 0.463636364 |             |           | 0.3255814 |
| ENSG00000204160 |            | 0.3597561  |            | 0.359756098 |             |           |           |
| ENSG00000115112 |            | 0.42682927 |            | 0.426829268 |             |           | 0.4545455 |
| ENSG00000115310 | 0.34730539 |            | 0.34730539 |             | 0.113095238 | 0.0523256 |           |
| ENSG00000186191 |            | 0.33333333 |            | 0.333333333 |             |           | 0.2470588 |
| ENSG00000105639 | 0.32222222 | 0.42424242 | 0.32222222 | 0.424242424 | 0.244444444 | 0.2333333 | 0.494186  |
| ENSG00000170876 |            | 0.39090909 |            | 0.390909091 |             |           | 0.4186047 |

|                 |            |            |            |             |             |  |           |           |
|-----------------|------------|------------|------------|-------------|-------------|--|-----------|-----------|
| ENSG00000117862 | 0.32335329 |            | 0.32335329 |             | 0.130952381 |  | 0.0813953 |           |
| ENSG00000119919 |            | 0.27575758 |            | 0.27575758  |             |  |           | 0.372093  |
| ENSG00000173480 |            | 0.48888889 |            | 0.48888889  |             |  |           | 0.494186  |
| ENSG00000105851 |            | 0.46969697 |            | 0.46969697  | 0.071428571 |  |           | 0.4883721 |
| ENSG00000141696 |            | 0.09937888 |            | 0.09937888  | 0.089285714 |  | 0.0872093 |           |
| ENSG00000136908 | 0.30838323 |            | 0.30838323 |             | 0.375       |  | 0.4069767 |           |
| ENSG00000171840 | 0.28143713 | 0.09090909 | 0.28143713 | 0.09090909  | 0.403614458 |  | 0.4058824 | 0.1860465 |
| ENSG00000158296 |            | 0.2969697  |            | 0.2969697   |             |  |           | 0.3058824 |
| ENSG00000180376 | 0.05       | 0.43333333 | 0.05       | 0.43333333  |             |  |           | 0.4886364 |
| ENSG0000010319  |            | 0.45757576 |            | 0.45757576  |             |  |           | 0.3953488 |
| ENSG00000101181 |            | 0.47575758 |            | 0.47575758  |             |  |           | 0.3139535 |
| ENSG00000241484 | 0.43888889 | 0.26060606 | 0.43888889 | 0.26060606  | 0.133333333 |  | 0.0777778 | 0.3662791 |
| ENSG00000074356 | 0.18862275 |            | 0.18862275 |             |             |  |           |           |
| ENSG00000007384 |            | 0.17241379 |            | 0.17241379  |             |  |           | 0.5       |
| ENSG00000145861 |            | 0.42528736 |            | 0.42528736  |             |  |           | 0.4545455 |
| ENSG00000165861 | 0.05487805 | 0.34090909 | 0.05487805 | 0.34090909  | 0.195121951 |  | 0.1764706 | 0.1333333 |
| ENSG00000242515 |            | 0.22777778 |            | 0.22777778  |             |  |           | 0.1590909 |
| ENSG00000184384 | 0.22159091 | 0.36890244 | 0.22159091 | 0.368902439 | 0.444444444 |  | 0.4767442 | 0.372093  |
| ENSG00000159200 | 0.4939759  | 0.07012195 | 0.4939759  | 0.070121951 | 0.391566265 |  | 0.372093  |           |
| ENSG00000102595 |            | 0.45151515 |            | 0.45151515  |             |  |           | 0.2790698 |
| ENSG00000074803 | 0.34730539 |            | 0.34730539 |             | 0.311111111 |  | 0.5       | 0.4823529 |
| ENSG00000114378 |            | 0.13636364 |            | 0.13636364  | 0.36746988  |  | 0.4825581 |           |
| ENSG00000112499 | 0.12275449 | 0.22424242 | 0.12275449 | 0.22424242  | 0.083333333 |  | 0.0697674 | 0.1395349 |
| ENSG00000073146 | 0.19886364 | 0.33030303 | 0.19886364 | 0.33030303  | 0.377777778 |  | 0.5       | 0.2840909 |
| ENSG00000175518 | 0.23952096 | 0.24242424 | 0.23952096 | 0.24242424  | 0.380952381 |  | 0.3953488 | 0.3430233 |
| ENSG00000137501 | 0.43373494 |            | 0.43373494 |             | 0.398809524 |  | 0.4302326 |           |
| ENSG00000256683 |            | 0.13333333 |            | 0.13333333  |             |  |           | 0.1802326 |
| ENSG00000116459 | 0.44311377 | 0.35       | 0.44311377 | 0.35        | 0.255952381 |  | 0.255814  | 0.2674419 |
| ENSG00000107669 | 0.12777778 | 0.14545455 | 0.12777778 | 0.14545455  | 0.344444444 |  | 0.3068182 | 0.4529412 |
| ENSG00000259119 | 0.21856287 | 0.32822086 | 0.21856287 | 0.328220859 | 0.25        |  | 0.2732558 | 0.1802326 |
| ENSG00000204604 | 0.09195402 | 0.42727273 | 0.09195402 | 0.427272727 |             |  | 0.0568182 | 0.4011628 |
| ENSG00000176386 | 0.32183908 |            | 0.32183908 |             | 0.360465116 |  | 0.4090909 |           |
| ENSG00000006715 |            | 0.37878788 |            | 0.378787879 |             |  |           | 0.3895349 |
| ENSG00000196152 |            |            |            |             | 0.25        |  | 0.25      |           |
| ENSG00000143799 |            | 0.38181818 |            | 0.381818182 |             |  |           | 0.2151163 |
| ENSG00000139656 |            |            |            |             |             |  |           | 0.125     |
| ENSG00000137699 | 0.15868263 | 0.14848485 | 0.15868263 | 0.148484848 | 0.5         |  | 0.4418605 |           |
| ENSG00000081985 | 0.38333333 | 0.35151515 | 0.38333333 | 0.351515152 | 0.25        |  | 0.2732558 | 0.4360465 |
| ENSG00000101773 | 0.3742515  |            | 0.3742515  |             |             |  |           |           |
| ENSG00000105835 |            | 0.3902439  |            | 0.390243902 |             |  |           | 0.0813953 |
| ENSG00000115484 |            | 0.06969697 |            | 0.06969697  |             |  |           |           |
| ENSG00000148229 |            | 0.36280488 |            | 0.362804878 |             |  |           |           |
| ENSG00000188811 |            | 0.0969697  |            | 0.096969697 |             |  |           | 0.1627907 |
| ENSG00000204850 |            | 0.07222222 |            | 0.072222222 |             |  |           | 0.1477273 |
| ENSG00000175066 |            | 0.38787879 |            | 0.387878788 |             |  |           | 0.2383721 |
| ENSG00000103184 |            | 0.48787879 |            | 0.487878788 |             |  |           | 0.3411765 |
| ENSG00000185264 | 0.19578313 |            | 0.19578313 |             | 0.482142857 |  | 0.3023256 |           |
| ENSG00000092470 |            | 0.06134969 |            | 0.061349693 |             |  |           | 0.2235294 |
| ENSG00000112299 |            | 0.31818182 |            | 0.318181818 |             |  |           | 0.2941176 |
| ENSG00000250722 | 0.47222222 | 0.3030303  | 0.47222222 | 0.303030303 | 0.388888889 |  | 0.4666667 | 0.3392857 |
| ENSG00000147256 |            | 0.17878788 |            | 0.178787879 |             |  |           | 0.4882353 |
| ENSG00000125885 | 0.39221557 |            | 0.39221557 |             | 0.083333333 |  | 0.0813953 |           |
| ENSG00000141255 |            | 0.16111111 |            | 0.161111111 |             |  |           | 0.3555556 |
| ENSG00000100814 | 0.24550898 |            | 0.24550898 |             | 0.44047619  |  | 0.4825581 |           |

|                        |            |            |            |             |             |           |           |
|------------------------|------------|------------|------------|-------------|-------------|-----------|-----------|
| <b>ENSG00000245017</b> |            | 0.375      |            | 0.375       |             |           |           |
| <b>ENSG00000119688</b> | 0.15340909 | 0.2969697  | 0.15340909 | 0.296969697 | 0.255952381 | 0.244186  | 0.244186  |
| <b>ENSG00000104880</b> | 0.24157303 | 0.31212121 | 0.24157303 | 0.312121212 | 0.344444444 | 0.3488372 | 0.3953488 |
| <b>ENSG00000175906</b> |            | 0.30606061 |            | 0.306060606 |             |           | 0.372093  |
| <b>ENSG00000149328</b> |            | 0.43636364 |            | 0.436363636 |             |           | 0.1453488 |
| <b>ENSG00000204291</b> |            | 0.22699387 |            | 0.226993865 |             | 0.0681818 | 0.3176471 |
| <b>ENSG00000163823</b> |            | 0.08484848 |            | 0.084848485 |             |           |           |
| <b>ENSG00000188257</b> | 0.14204545 | 0.19444444 | 0.14204545 | 0.194444444 |             |           | 0.2176471 |
| <b>ENSG00000170989</b> | 0.08083832 |            | 0.08083832 |             | 0.297619048 | 0.2       |           |
| <b>ENSG00000154710</b> |            | 0.23030303 |            | 0.23030303  |             |           | 0.4       |
| <b>ENSG00000132470</b> |            | 0.42944785 |            | 0.429447853 |             |           | 0.4069767 |
| <b>ENSG00000108381</b> |            | 0.35757576 |            | 0.357575758 |             |           | 0.3863636 |
| <b>ENSG00000258405</b> |            | 0.43939394 |            | 0.439393939 |             |           | 0.4127907 |
| <b>ENSG00000161955</b> |            | 0.19090909 |            | 0.190909091 |             |           | 0.0823529 |
| <b>ENSG00000139168</b> | 0.38202247 |            | 0.38202247 |             | 0.455555556 | 0.4090909 |           |
| <b>ENSG00000065054</b> |            | 0.15151515 |            | 0.151515152 |             |           |           |
| <b>ENSG00000122406</b> | 0.33532934 |            | 0.33532934 |             |             |           |           |
| <b>ENSG00000164733</b> | 0.32335329 | 0.35757576 | 0.32335329 | 0.357575758 | 0.470238095 | 0.4709302 | 0.4705882 |
| <b>ENSG00000258873</b> |            | 0.48484848 |            | 0.484848485 |             |           | 0.3666667 |
| <b>ENSG00000105642</b> |            | 0.48484848 |            | 0.484848485 |             |           | 0.4764706 |
| <b>ENSG00000168228</b> |            | 0.42424242 |            | 0.424242424 |             |           | 0.4880952 |
| <b>ENSG00000124164</b> |            | 0.41818182 |            | 0.418181818 |             |           | 0.3977273 |
| <b>ENSG00000105514</b> |            | 0.09090909 |            | 0.090909091 |             |           | 0.2325581 |
| <b>ENSG00000198939</b> | 0.28888889 | 0.08181818 | 0.28888889 | 0.081818182 | 0.244444444 | 0.3555556 | 0.1686047 |
| <b>ENSG00000204683</b> |            | 0.33030303 |            | 0.33030303  |             |           | 0.3588235 |
| <b>ENSG00000151332</b> | 0.37777778 | 0.06748466 | 0.37777778 | 0.067484663 | 0.055555556 |           |           |
| <b>ENSG00000135677</b> | 0.33832335 | 0.40697674 | 0.33832335 | 0.406976744 | 0.107142857 | 0.1744186 | 0.2325581 |
| <b>ENSG00000145386</b> | 0.0505618  |            | 0.0505618  |             | 0.219512195 | 0.2619048 | 0.0872093 |
| <b>ENSG00000066813</b> |            | 0.1552795  |            | 0.155279503 |             |           | 0.4529412 |
| <b>ENSG00000204308</b> |            | 0.2030303  |            | 0.203030303 |             |           | 0.2674419 |
| <b>ENSG00000166435</b> | 0.09090909 | 0.44512195 | 0.09090909 | 0.445121951 | 0.476190476 | 0.4411765 | 0.4476744 |
| <b>ENSG00000167094</b> |            | 0.45757576 |            | 0.457575758 |             |           | 0.3837209 |
| <b>ENSG00000187003</b> |            | 0.16363636 |            | 0.163636364 |             |           | 0.1511628 |
| <b>ENSG00000198887</b> |            | 0.32777778 |            | 0.327777778 |             |           | 0.4090909 |
| <b>ENSG00000222005</b> |            | 0.46060606 |            | 0.460606061 |             |           | 0.372093  |
| <b>ENSG00000164600</b> |            | 0.28658537 |            | 0.286585366 |             |           | 0.1802326 |
| <b>ENSG00000124406</b> |            | 0.37037037 |            | 0.37037037  |             |           | 0.4625    |
| <b>ENSG00000166974</b> |            | 0.33333333 |            | 0.333333333 |             |           | 0.4352941 |
| <b>ENSG00000165959</b> | 0.18862275 |            | 0.18862275 |             | 0.321428571 | 0.4       |           |
| <b>ENSG00000140650</b> |            | 0.1969697  |            | 0.196969697 |             |           | 0.3235294 |
| <b>ENSG00000069493</b> | 0.20555556 | 0.42727273 | 0.20555556 | 0.427272727 | 0.3         | 0.375     | 0.3604651 |
| <b>ENSG00000123146</b> | 0.47468354 |            | 0.47468354 |             | 0.146341463 | 0.1125    |           |
| <b>ENSG00000184787</b> |            | 0.3969697  |            | 0.396969697 |             |           | 0.4772727 |
| <b>ENSG00000130856</b> |            | 0.47560976 |            | 0.475609756 |             |           | 0.4244186 |
| <b>ENSG00000167104</b> |            | 0.48780488 |            | 0.487804878 |             |           | 0.2882353 |
| <b>ENSG00000132475</b> |            | 0.44848485 |            | 0.448484848 |             |           | 0.4011628 |
| <b>ENSG00000162704</b> |            | 0.49090909 |            | 0.490909091 |             |           | 0.1627907 |
| <b>ENSG00000184752</b> |            | 0.23170732 |            | 0.231707317 |             |           | 0.0722892 |
| <b>ENSG00000180694</b> |            | 0.36060606 |            | 0.360606061 |             |           | 0.3555556 |
| <b>ENSG00000175305</b> |            | 0.15757576 |            | 0.157575758 |             |           | 0.0988372 |
| <b>ENSG00000177301</b> | 0.49700599 | 0.16363636 | 0.49700599 | 0.163636364 | 0.392857143 | 0.3988095 | 0.4464286 |
| <b>ENSG00000115474</b> |            | 0.29090909 |            | 0.290909091 |             |           | 0.2848837 |
| <b>ENSG00000096006</b> |            | 0.0969697  |            | 0.096969697 |             |           |           |
| <b>ENSG00000204764</b> |            | 0.35393258 |            | 0.353932584 |             |           | 0.2613636 |

|                 |            |            |            |             |             |           |           |
|-----------------|------------|------------|------------|-------------|-------------|-----------|-----------|
| ENSG00000136982 |            | 0.43333333 |            | 0.433333333 |             |           | 0.4090909 |
| ENSG00000134588 | 0.43888889 |            | 0.43888889 |             |             |           |           |
| ENSG00000114859 | 0.49700599 |            | 0.49700599 | 0.410714286 |             | 0.4069767 |           |
| ENSG00000107566 | 0.38622754 |            | 0.38622754 | 0.095238095 |             | 0.1860465 | 0.4759036 |
| ENSG00000145919 |            | 0.13333333 |            | 0.133333333 |             |           | 0.0888889 |
| ENSG00000162873 | 0.49375    | 0.30113636 | 0.49375    | 0.301136364 | 0.487804878 | 0.4594595 |           |
| ENSG00000111452 |            | 0.40606061 |            | 0.406060606 | 0.220930233 | 0.3222222 | 0.3953488 |
| ENSG00000132406 | 0.5        | 0.17878788 | 0.5        | 0.178787879 | 0.452380952 | 0.4011628 | 0.2616279 |
| ENSG00000184792 | 0.2826087  | 0.32727273 | 0.2826087  | 0.327272727 | 0.160493827 | 0.2159091 | 0.4069767 |
| ENSG00000078053 | 0.06111111 | 0.37116564 | 0.06111111 | 0.371165644 |             |           | 0.4329268 |
| ENSG00000167994 |            | 0.43030303 |            | 0.43030303  | 0.255952381 | 0.2965116 | 0.0595238 |
| ENSG00000186787 |            |            |            | 0.333333333 |             | 0.2616279 |           |
| ENSG00000151746 |            | 0.49050633 |            | 0.490506329 |             |           | 0.4593023 |
| ENSG00000170873 | 0.45808383 | 0.18484848 | 0.45808383 | 0.184848485 | 0.31547619  | 0.3823529 |           |
| ENSG00000163125 |            | 0.43333333 |            | 0.433333333 |             |           | 0.3662791 |
| ENSG00000065613 |            | 0.18539326 |            | 0.185393258 |             |           | 0.4186047 |
| ENSG00000064042 | 0.1        | 0.15757576 | 0.1        | 0.157575758 |             |           | 0.1511628 |
| ENSG00000104320 | 0.29041916 | 0.34848485 | 0.29041916 | 0.348484848 | 0.452380952 | 0.4360465 | 0.4360465 |
| ENSG00000150540 | 0.46706587 | 0.2202381  | 0.46706587 | 0.220238095 | 0.327380952 | 0.3372093 | 0.2666667 |
| ENSG00000167693 |            | 0.47878788 |            | 0.478787879 |             |           | 0.3       |
| ENSG00000147138 | 0.46407186 |            | 0.46407186 |             | 0.44047619  | 0.4767442 |           |
| ENSG00000198113 |            | 0.2607362  |            | 0.260736196 |             |           | 0.4939759 |
| ENSG00000128683 |            | 0.26993865 |            | 0.26993865  | 0.232142857 | 0.2647059 | 0.3081395 |
| ENSG00000146426 | 0.40718563 | 0.31976744 | 0.40718563 | 0.319767442 | 0.488636364 | 0.4817073 |           |
| ENSG00000128573 |            | 0.48876404 |            | 0.488764045 |             |           | 0.3313953 |
| ENSG00000255986 |            |            |            |             |             |           | 0.0595238 |
| ENSG00000187187 | 0.47305389 |            | 0.47305389 |             | 0.160714286 | 0.127907  | 0.0777778 |
| ENSG00000198205 |            |            |            |             |             |           | 0.1931818 |
| ENSG00000143199 |            | 0.41212121 |            | 0.412121212 |             |           | 0.1976744 |
| ENSG00000141084 |            | 0.1030303  |            | 0.103030303 |             |           | 0.0523256 |
| ENSG00000178665 |            | 0.48333333 |            | 0.483333333 |             |           | 0.4333333 |
| ENSG00000168646 |            | 0.43333333 |            | 0.433333333 |             |           | 0.377907  |
| ENSG00000014914 | 0.28742515 |            | 0.28742515 |             | 0.255952381 | 0.4418605 |           |
| ENSG00000138768 |            |            |            | 0.069767442 |             |           |           |
| ENSG00000115282 |            | 0.11515152 |            | 0.115151515 | 0.154761905 | 0.1802326 | 0.1860465 |
| ENSG00000197756 | 0.43413174 | 0.14242424 | 0.43413174 | 0.142424242 | 0.410714286 | 0.4244186 | 0.1511628 |
| ENSG00000185527 |            | 0.39090909 |            | 0.390909091 |             |           | 0.2906977 |
| ENSG00000144045 |            | 0.12424242 |            | 0.124242424 |             |           | 0.1918605 |
| ENSG00000171680 | 0.45783133 | 0.12121212 | 0.45783133 | 0.121212121 | 0.267857143 | 0.25      |           |
| ENSG00000197406 |            | 0.11515152 |            | 0.115151515 |             |           |           |
| ENSG00000198707 | 0.31736527 |            | 0.31736527 |             | 0.201219512 | 0.3588235 | 0.3588235 |
| ENSG00000104442 | 0.22159091 | 0.35454545 | 0.22159091 | 0.354545455 | 0.465909091 | 0.4444444 | 0.4318182 |
| ENSG00000113391 | 0.1        | 0.14285714 | 0.1        | 0.142857143 | 0.088888889 | 0.1       | 0.1025641 |
| ENSG00000101680 | 0.08383234 |            | 0.08383234 |             |             |           |           |
| ENSG00000253304 |            | 0.14634146 |            | 0.146341463 |             |           | 0.4767442 |
| ENSG00000073754 |            | 0.17777778 |            | 0.177777778 | 0.136904762 | 0.2383721 | 0.3444444 |
| ENSG00000106610 |            | 0.49425287 |            | 0.494252874 |             |           | 0.4418605 |
| ENSG00000137692 |            |            |            | 0.181818182 |             | 0.1818182 |           |
| ENSG00000128713 |            | 0.33841463 |            | 0.338414634 |             |           | 0.4651163 |
| ENSG00000152078 |            | 0.30909091 |            | 0.309090909 |             |           | 0.3614458 |
| ENSG00000117505 | 0.26204819 | 0.13333333 | 0.26204819 | 0.133333333 | 0.31547619  | 0.3294118 | 0.0523256 |
| ENSG00000151718 |            | 0.24719101 |            | 0.247191011 |             |           | 0.2272727 |
| ENSG00000170175 |            | 0.17878788 |            | 0.178787879 |             |           | 0.3372093 |
| ENSG00000163331 |            | 0.35151515 |            | 0.351515152 |             |           | 0.1337209 |



|                 |            |            |            |             |             |           |                     |
|-----------------|------------|------------|------------|-------------|-------------|-----------|---------------------|
| ENSG00000108771 | 0.10227273 |            | 0.10227273 |             | 0.088888889 |           | 0.1111111           |
| ENSG00000214106 | 0.44311377 | 0.42045455 | 0.44311377 | 0.42045455  | 0.244047619 |           | 0.2383721 0.4593023 |
| ENSG00000080823 | 0.38922156 | 0.19393939 | 0.38922156 | 0.193939394 | 0.071428571 |           | 0.0930233 0.1176471 |
| ENSG00000105402 |            | 0.12424242 |            | 0.124242424 |             |           | 0.2267442           |
| ENSG00000186153 | 0.1497006  |            | 0.1497006  |             | 0.178571429 |           | 0.1918605           |
| ENSG00000137449 |            |            |            |             |             |           | 0.3409091           |
| ENSG00000110841 |            | 0.43678161 |            | 0.436781609 |             | 0.0568182 | 0.4666667           |
| ENSG00000133065 |            | 0.46987952 |            | 0.469879518 |             |           | 0.4011628           |
| ENSG00000069849 |            | 0.24367089 |            | 0.243670886 |             |           | 0.0705882           |
| ENSG00000141505 | 0.07185629 |            | 0.07185629 |             |             |           |                     |
| ENSG00000091490 | 0.1        | 0.4689441  | 0.1        | 0.468944099 |             |           | 0.2906977           |
| ENSG00000153721 | 0.31515152 | 0.19393939 | 0.31515152 | 0.193939394 | 0.297619048 | 0.1686047 | 0.1627907           |
| ENSG00000141569 |            | 0.23333333 |            | 0.233333333 |             |           | 0.1802326           |
| ENSG00000135476 | 0.17065868 | 0.30606061 | 0.17065868 | 0.306060606 |             |           |                     |
| ENSG00000197912 |            | 0.44512195 |            | 0.445121951 |             |           | 0.2176471           |
| ENSG00000198380 |            | 0.41111111 |            | 0.411111111 |             |           | 0.4476744           |
| ENSG00000011143 |            | 0.0797546  |            | 0.079754601 |             |           | 0.0755814           |
| ENSG00000152904 | 0.38622754 | 0.49444444 | 0.38622754 | 0.494444444 | 0.210843373 | 0.3255814 | 0.3863636           |
| ENSG00000115762 |            | 0.10555556 |            | 0.105555556 |             |           | 0.1333333           |
| ENSG00000164035 |            | 0.27044025 |            | 0.270440252 |             |           | 0.1046512           |
| ENSG00000239672 | 0.35329341 | 0.48787879 | 0.35329341 | 0.487878788 | 0.273809524 | 0.2674419 | 0.5                 |
| ENSG00000196600 |            | 0.48148148 |            | 0.481481481 |             |           | 0.4                 |
| ENSG00000024048 |            | 0.36969697 |            | 0.36969697  |             |           | 0.4470588           |
| ENSG00000122966 | 0.48502994 | 0.34969325 | 0.48502994 | 0.349693252 | 0.464285714 | 0.3941176 | 0.1046512           |
| ENSG00000244165 |            | 0.44827586 |            | 0.448275862 |             |           | 0.4431818           |
| ENSG00000173890 |            | 0.31212121 |            | 0.312121212 |             |           | 0.4534884           |
| ENSG00000159110 |            | 0.33860759 |            | 0.338607595 |             |           | 0.4882353           |
| ENSG00000129595 |            | 0.33939394 |            | 0.339393939 |             |           | 0.377907            |
| ENSG00000148942 | 0.3125     | 0.48181818 | 0.3125     | 0.481818182 | 0.111111111 | 0.1363636 | 0.4888889           |
| ENSG00000204231 |            | 0.31547619 |            | 0.31547619  |             |           | 0.2159091           |
| ENSG00000126882 | 0.21556886 |            | 0.21556886 |             | 0.476190476 |           | 0.494186            |
| ENSG00000151876 |            | 0.06741573 |            | 0.06741573  |             |           |                     |
| ENSG00000168918 |            | 0.18787879 |            | 0.187878788 |             |           | 0.3588235           |
| ENSG00000112319 |            | 0.41463415 |            | 0.414634146 |             |           | 0.25                |
| ENSG00000206052 |            | 0.46629213 |            | 0.466292135 |             |           | 0.3977273           |
| ENSG00000152558 | 0.19886364 | 0.16111111 | 0.19886364 | 0.161111111 | 0.060240964 | 0.0714286 |                     |
| ENSG00000188986 |            | 0.05590062 |            | 0.055900621 |             |           |                     |
| ENSG00000197181 | 0.10479042 |            | 0.10479042 |             | 0.172619048 |           | 0.1337209           |
| ENSG00000063176 | 0.22754491 | 0.13483146 | 0.22754491 | 0.134831461 |             |           | 0.0681818           |
| ENSG00000251192 |            | 0.42331288 |            | 0.423312883 |             |           | 0.0588235           |
| ENSG00000136098 | 0.22727273 | 0.46111111 | 0.22727273 | 0.461111111 | 0.464285714 | 0.494186  | 0.4204545           |
| ENSG00000134897 |            | 0.35555556 |            | 0.355555556 |             |           | 0.3604651           |
| ENSG00000258436 |            | 0.18181818 |            | 0.181818182 |             |           | 0.2093023           |
| ENSG00000148481 | 0.44277108 |            | 0.44277108 |             | 0.166666667 | 0.1569767 |                     |
| ENSG00000180305 | 0.21556886 |            | 0.21556886 |             | 0.363095238 |           | 0.3139535           |
| ENSG00000240403 |            |            |            |             |             |           | 0.1627907           |
| ENSG00000203970 |            |            |            |             | 0.081395349 | 0.0792683 |                     |
| ENSG00000040933 |            | 0.23030303 |            | 0.23030303  |             |           | 0.2906977           |
| ENSG00000235863 |            | 0.15454545 |            | 0.154545455 |             |           | 0.0872093           |
| ENSG00000152763 | 0.08333333 | 0.48159509 | 0.08333333 | 0.481595092 |             | 0.1477273 | 0.377907            |
| ENSG00000116957 |            | 0.07222222 |            | 0.072222222 |             |           |                     |
| ENSG00000113838 | 0.48203593 |            | 0.48203593 |             | 0.125       | 0.1744186 |                     |
| ENSG00000110427 |            | 0.31818182 |            | 0.318181818 |             |           | 0.255814            |
| ENSG00000170340 |            | 0.13333333 |            | 0.133333333 |             |           | 0.377907            |





|                 |            |            |            |             |             |           |           |
|-----------------|------------|------------|------------|-------------|-------------|-----------|-----------|
| ENSG00000131378 |            | 0.30555556 |            | 0.30555556  |             |           | 0.4767442 |
| ENSG00000119714 |            |            |            |             |             |           | 0.0872093 |
| ENSG00000145248 |            | 0.21646341 |            | 0.216463415 |             |           | 0.0813953 |
| ENSG00000133740 | 0.20555556 |            | 0.20555556 |             |             |           |           |
| ENSG00000198912 |            | 0.1030303  |            | 0.103030303 |             |           | 0.3630952 |
| ENSG00000116106 |            | 0.37878788 |            | 0.378787879 |             |           | 0.2840909 |
| ENSG00000166035 | 0.21666667 | 0.48295455 | 0.21666667 | 0.482954545 | 0.133333333 | 0.0888889 | 0.4767442 |
| ENSG00000171310 | 0.12121212 | 0.31515152 | 0.12121212 | 0.315151515 | 0.071428571 |           | 0.4709302 |
| ENSG00000154217 |            |            |            |             | 0.280487805 | 0.4090909 |           |
| ENSG00000188511 | 0.16566265 | 0.46111111 | 0.16566265 | 0.461111111 | 0.398809524 | 0.3690476 | 0.4011628 |
| ENSG00000131187 | 0.40419162 |            | 0.40419162 |             | 0.30952381  | 0.3023256 |           |
| ENSG00000136100 |            | 0.40606061 |            | 0.406060606 |             |           | 0.3470588 |
| ENSG00000165655 | 0.38922156 |            | 0.38922156 |             |             |           |           |
| ENSG00000163104 |            | 0.44654088 |            | 0.446540881 |             |           | 0.4235294 |
| ENSG00000172594 |            | 0.30434783 |            | 0.304347826 |             |           | 0.4823529 |
| ENSG00000048392 |            | 0.13109756 |            | 0.131097561 |             |           |           |
| ENSG00000136932 | 0.17365269 | 0.31818182 | 0.17365269 | 0.318181818 | 0.226190476 | 0.1511628 | 0.1647059 |
| ENSG00000070601 | 0.48802395 |            | 0.48802395 |             | 0.148809524 | 0.127907  |           |
| ENSG00000121716 | 0.2005988  | 0.15757576 | 0.2005988  | 0.157575758 | 0.151162791 | 0.1976744 |           |
| ENSG00000125875 |            | 0.44848485 |            | 0.448484848 |             |           | 0.4127907 |
| ENSG00000177951 |            | 0.32121212 |            | 0.321212121 |             |           | 0.4360465 |
| ENSG00000139637 | 0.26347305 |            | 0.26347305 |             |             |           |           |
| ENSG00000106355 | 0.39221557 | 0.45454545 | 0.39221557 | 0.454545455 | 0.255555556 | 0.0988372 | 0.2882353 |
| ENSG00000125844 |            | 0.2        |            | 0.2         |             |           | 0.4651163 |
| ENSG00000148795 | 0.28443114 |            | 0.28443114 |             | 0.410714286 | 0.4593023 |           |
| ENSG00000134460 |            | 0.4030303  |            | 0.403030303 |             |           | 0.2428571 |
| ENSG00000171724 |            | 0.44545455 |            | 0.445454545 |             |           | 0.4090909 |
| ENSG00000101439 |            | 0.35955056 |            | 0.359550562 |             |           | 0.3111111 |
| ENSG00000107165 | 0.18862275 | 0.35454545 | 0.18862275 | 0.354545455 |             |           |           |
| ENSG00000139330 |            | 0.05182927 |            | 0.051829268 |             |           | 0.1222222 |
| ENSG00000116525 |            | 0.23636364 |            | 0.236363636 |             | 0.1022727 | 0.377907  |
| ENSG00000163521 | 0.2994012  |            | 0.2994012  |             | 0.160714286 | 0.0988372 |           |
| ENSG00000135090 | 0.28313253 |            | 0.28313253 |             | 0.255952381 | 0.4069767 |           |
| ENSG00000137338 |            | 0.0969697  |            | 0.096969697 |             |           | 0.1882353 |
| ENSG00000178796 | 0.13473054 | 0.23333333 | 0.13473054 | 0.233333333 | 0.232142857 | 0.244186  | 0.3372093 |
| ENSG00000198049 | 0.13173653 |            | 0.13173653 |             |             |           |           |
| ENSG00000093167 | 0.16167665 | 0.48484848 | 0.16167665 | 0.484848485 |             |           | 0.2117647 |
| ENSG00000167766 | 0.36826347 | 0.46625767 | 0.36826347 | 0.466257669 | 0.477777778 | 0.4883721 | 0.3255814 |
| ENSG00000196284 |            | 0.46646341 |            | 0.466463415 | 0.266666667 | 0.2666667 | 0.2790698 |
| ENSG00000091831 | 0.49700599 | 0.44848485 | 0.49700599 | 0.448484848 | 0.398809524 | 0.3488372 | 0.3604651 |
| ENSG00000203734 | 0.26704545 | 0.47777778 | 0.26704545 | 0.477777778 | 0.261363636 | 0.3       | 0.3809524 |
| ENSG00000116151 |            | 0.34848485 |            | 0.348484848 |             |           | 0.4069767 |
| ENSG00000137274 | 0.15269461 |            | 0.15269461 |             | 0.078313253 | 0.0595238 |           |
| ENSG00000181781 |            | 0.22121212 |            | 0.221212121 |             |           | 0.3255814 |
| ENSG00000164932 | 0.21666667 |            | 0.21666667 |             | 0.433333333 | 0.3636364 |           |
| ENSG00000109047 | 0.17664671 | 0.27325581 | 0.17664671 | 0.273255814 | 0.351190476 | 0.3647059 | 0.1024096 |
| ENSG00000131370 | 0.4030303  | 0.29651163 | 0.4030303  | 0.296511628 | 0.30952381  | 0.2125    |           |
| ENSG00000198722 |            | 0.25454545 |            | 0.254545455 |             |           |           |
| ENSG00000078549 |            | 0.2969697  |            | 0.296969697 |             |           | 0.2666667 |
| ENSG00000146802 |            | 0.27044025 |            | 0.270440252 |             |           | 0.0681818 |
| ENSG00000177186 |            | 0.30337079 |            | 0.303370787 |             |           | 0.1860465 |
| ENSG00000075945 | 0.18862275 | 0.12727273 | 0.18862275 | 0.127272727 | 0.130952381 | 0.1162791 | 0.1511628 |
| ENSG00000158352 |            | 0.31111111 |            | 0.311111111 |             |           | 0.1363636 |
| ENSG00000166822 |            | 0.4        |            | 0.4         |             |           | 0.5       |

|                 |            |            |            |             |             |           |           |
|-----------------|------------|------------|------------|-------------|-------------|-----------|-----------|
| ENSG00000203722 |            | 0.15151515 |            | 0.151515152 |             |           | 0.4476744 |
| ENSG00000150764 |            | 0.29573171 |            | 0.295731707 |             |           | 0.3953488 |
| ENSG00000071203 |            | 0.42424242 |            | 0.424242424 |             |           | 0.3081395 |
| ENSG00000160055 |            | 0.05       |            | 0.05        |             |           |           |
| ENSG00000175866 | 0.0988024  | 0.26060606 | 0.0988024  | 0.260606061 | 0.228915663 | 0.1744186 | 0.3837209 |
| ENSG00000138434 | 0.15662651 | 0.14242424 | 0.15662651 | 0.142424242 | 0.05952381  | 0.0639535 | 0.1590909 |
| ENSG00000137948 | 0.44578313 |            | 0.44578313 |             | 0.416666667 |           | 0.4069767 |
| ENSG00000138483 |            |            |            |             | 0.172619048 |           | 0.1162791 |
| ENSG00000127241 | 0.24850299 | 0.48484848 | 0.24850299 | 0.484848485 | 0.244047619 | 0.1337209 | 0.5       |
| ENSG00000050438 | 0.06111111 | 0.45757576 | 0.06111111 | 0.457575758 |             |           | 0.4651163 |
| ENSG00000124356 | 0.45555556 | 0.2969697  | 0.45555556 | 0.296969697 | 0.363095238 | 0.4593023 | 0.4777778 |
| ENSG00000206531 | 0.21111111 | 0.39444444 | 0.21111111 | 0.394444444 |             |           |           |
| ENSG00000118946 |            | 0.27878788 |            | 0.278787879 |             |           | 0.4823529 |
| ENSG00000172995 | 0.38323353 | 0.36363636 | 0.38323353 | 0.363636364 | 0.101190476 | 0.2034884 | 0.4476744 |
| ENSG00000213934 |            | 0.4137931  |            | 0.413793103 |             |           | 0.3068182 |
| ENSG00000198597 |            | 0.17378049 |            | 0.173780488 |             |           | 0.3662791 |
| ENSG00000164106 | 0.28089888 |            | 0.28089888 |             |             |           |           |
| ENSG00000009724 |            | 0.14044944 |            | 0.140449438 |             |           | 0.1136364 |
| ENSG00000137266 | 0.25287356 | 0.12222222 | 0.25287356 | 0.122222222 | 0.31547619  | 0.2674419 | 0.3977273 |
| ENSG00000062194 |            | 0.41818182 |            | 0.418181818 | 0.058139535 |           | 0.255814  |
| ENSG00000168884 |            | 0.12121212 |            | 0.121212121 |             |           | 0.0581395 |
| ENSG00000150753 | 0.2994012  | 0.1969697  | 0.2994012  | 0.196969697 | 0.083333333 | 0.1104651 | 0.1686047 |
| ENSG00000179195 | 0.39221557 | 0.21022727 | 0.39221557 | 0.210227273 | 0.101190476 | 0.127907  |           |
| ENSG00000164168 |            |            |            |             |             |           | 0.1744186 |
| ENSG00000007908 | 0.07228916 | 0.24233129 | 0.07228916 | 0.242331288 |             |           | 0.373494  |
| ENSG00000071054 | 0.121875   | 0.4030303  | 0.121875   | 0.403030303 |             | 0.246988  | 0.4529412 |
| ENSG00000166321 |            | 0.05       |            | 0.05        |             |           | 0.2954545 |
| ENSG00000165891 |            | 0.46111111 |            | 0.461111111 |             |           | 0.3181818 |
| ENSG00000124588 | 0.35928144 | 0.13333333 | 0.35928144 | 0.133333333 | 0.307228916 | 0.3255814 | 0.1627907 |
| ENSG00000188316 |            | 0.20186335 |            | 0.201863354 |             |           | 0.1941176 |
| ENSG00000117266 | 0.15868263 | 0.39880952 | 0.15868263 | 0.398809524 | 0.071428571 | 0.0813953 | 0.3170732 |
| ENSG00000070367 |            | 0.17295597 |            | 0.172955975 |             |           | 0.0892857 |
| ENSG00000139714 |            | 0.07055215 |            | 0.070552147 |             |           |           |
| ENSG00000242247 |            | 0.48181818 |            | 0.481818182 |             |           | 0.3488372 |
| ENSG00000255103 |            | 0.18333333 |            | 0.183333333 |             |           | 0.2093023 |
| ENSG00000006128 |            | 0.18484848 |            | 0.184848485 |             |           | 0.2616279 |
| ENSG00000250151 |            | 0.11890244 |            | 0.118902439 |             |           | 0.0731707 |
| ENSG00000151952 | 0.36526946 | 0.26969697 | 0.36526946 | 0.26969697  | 0.369047619 | 0.372093  | 0.1686047 |
| ENSG00000198033 |            | 0.05194805 |            | 0.051948052 |             |           |           |
| ENSG00000092931 |            | 0.07716049 |            | 0.077160494 |             |           | 0.4634146 |
| ENSG00000137880 | 0.22222222 |            | 0.22222222 |             |             |           |           |
| ENSG00000136305 | 0.15361446 |            | 0.15361446 |             | 0.154761905 | 0.1823529 | 0.2       |
| ENSG00000112312 | 0.28888889 |            | 0.28888889 |             | 0.113636364 |           |           |
| ENSG00000148468 |            | 0.16666667 |            | 0.166666667 |             |           | 0.1453488 |
| ENSG00000103855 |            | 0.49090909 |            | 0.490909091 |             |           | 0.4127907 |
| ENSG00000101265 | 0.07777778 | 0.39393939 | 0.07777778 | 0.393939394 | 0.1         | 0.0681818 | 0.4069767 |
| ENSG00000211452 | 0.25       | 0.37272727 | 0.25       | 0.372727273 | 0.119047619 | 0.1046512 | 0.1511628 |
| ENSG00000106086 |            | 0.23563218 |            | 0.235632184 |             |           | 0.1860465 |
| ENSG00000187147 |            | 0.35151515 |            | 0.351515152 |             |           | 0.0930233 |
| ENSG00000102678 |            | 0.13888889 |            | 0.138888889 |             |           |           |
| ENSG00000176986 | 0.15568862 | 0.11515152 | 0.15568862 | 0.115151515 | 0.172619048 | 0.1569767 | 0.127907  |
| ENSG00000055950 |            | 0.47727273 |            | 0.477272727 |             |           |           |
| ENSG00000169302 |            | 0.21212121 |            | 0.212121212 |             |           | 0.1569767 |
| ENSG00000197329 | 0.14444444 | 0.12727273 | 0.14444444 | 0.127272727 | 0.155555556 | 0.1022727 | 0.0823529 |

|                 |            |            |            |             |             |           |           |
|-----------------|------------|------------|------------|-------------|-------------|-----------|-----------|
| ENSG00000160963 |            | 0.21818182 |            | 0.218181818 |             |           | 0.2732558 |
| ENSG00000198756 | 0.08982036 | 0.46319018 | 0.08982036 | 0.463190184 | 0.273809524 | 0.2674419 | 0.4883721 |
| ENSG00000144824 | 0.25149701 | 0.37804878 | 0.25149701 | 0.37804878  | 0.214285714 | 0.2267442 | 0.3555556 |
| ENSG00000155629 |            | 0.3030303  |            | 0.303030303 |             |           | 0.1337209 |
| ENSG00000126107 |            | 0.23636364 |            | 0.236363636 |             |           | 0.2823529 |
| ENSG00000197312 |            | 0.41666667 |            | 0.416666667 |             |           | 0.377907  |
| ENSG00000059915 |            | 0.36363636 |            | 0.363636364 |             |           | 0.2034884 |
| ENSG00000168077 |            | 0.26744186 |            | 0.26744186  |             |           | 0.5       |
| ENSG00000180543 |            | 0.39393939 |            | 0.393939394 |             |           | 0.4593023 |
| ENSG00000198498 | 0.27844311 | 0.5        | 0.27844311 | 0.5         | 0.451807229 | 0.4058824 | 0.3666667 |
| ENSG00000086288 | 0.05       |            | 0.05       |             | 0.113636364 | 0.1627907 |           |
| ENSG00000139631 | 0.16666667 | 0.21341463 | 0.16666667 | 0.213414634 | 0.111111111 | 0.255814  | 0.375     |
| ENSG00000106665 |            | 0.33333333 |            | 0.333333333 |             |           | 0.1704545 |
| ENSG00000162441 | 0.17272727 |            | 0.17272727 |             | 0.398809524 | 0.3197674 |           |
| ENSG00000188056 | 0.22754491 | 0.48484848 | 0.22754491 | 0.484848485 | 0.101190476 |           | 0.4534884 |
| ENSG00000083099 |            | 0.47777778 |            | 0.477777778 |             |           | 0.2045455 |
| ENSG00000196923 |            | 0.45705521 |            | 0.457055215 |             |           | 0.3081395 |
| ENSG00000165355 |            | 0.23636364 |            | 0.236363636 |             |           | 0.494186  |
| ENSG00000185359 |            | 0.12777778 |            | 0.127777778 |             |           | 0.2941176 |
| ENSG00000165152 | 0.06666667 | 0.44545455 | 0.06666667 | 0.445454545 | 0.077777778 |           | 0.4651163 |
| ENSG00000179055 |            | 0.27575758 |            | 0.275757576 |             |           | 0.4476744 |
| ENSG00000111319 |            | 0.25555556 |            | 0.255555556 |             |           | 0.3111111 |
| ENSG00000167759 | 0.43413174 | 0.45151515 | 0.43413174 | 0.451515152 | 0.369047619 | 0.3023256 | 0.372093  |
| ENSG00000185792 |            | 0.14634146 |            | 0.146341463 |             |           | 0.1511628 |
| ENSG00000180611 |            | 0.4695122  |            | 0.469512195 |             |           | 0.4352941 |
| ENSG00000168952 | 0.5        | 0.42727273 | 0.5        | 0.427272727 | 0.166666667 | 0.255814  | 0.4883721 |
| ENSG00000129472 |            | 0.16363636 |            | 0.163636364 |             |           | 0.0639535 |
| ENSG00000172732 | 0.17065868 |            | 0.17065868 |             | 0.271084337 | 0.4       |           |
| ENSG00000091140 |            | 0.43030303 |            | 0.43030303  |             |           | 0.4825581 |
| ENSG00000164124 | 0.16111111 | 0.43030303 | 0.16111111 | 0.43030303  | 0.068181818 | 0.0697674 | 0.2117647 |
| ENSG00000084110 | 0.12275449 | 0.39506173 | 0.12275449 | 0.395061728 |             |           | 0.4360465 |
| ENSG00000166444 | 0.18888889 |            | 0.18888889 |             | 0.088888889 |           |           |
| ENSG00000138073 |            | 0.16363636 |            | 0.163636364 |             |           | 0.1744186 |
| ENSG00000135845 | 0.10479042 |            | 0.10479042 |             | 0.327380952 | 0.3546512 |           |
| ENSG00000069122 | 0.22155689 | 0.3006135  | 0.22155689 | 0.300613497 | 0.18452381  | 0.1686047 | 0.4117647 |
| ENSG00000125319 |            | 0.33231707 |            | 0.332317073 |             |           | 0.4176471 |
| ENSG00000115053 |            |            |            |             |             |           | 0.1744186 |
| ENSG00000076555 | 0.42134831 | 0.17777778 | 0.42134831 | 0.177777778 | 0.322222222 | 0.3662791 | 0.2906977 |
| ENSG00000123472 |            | 0.26111111 |            | 0.261111111 |             |           | 0.4166667 |
| ENSG00000166598 | 0.47222222 |            | 0.47222222 |             | 0.444444444 | 0.4886364 |           |
| ENSG00000116670 |            | 0.2        |            | 0.2         | 0.422222222 | 0.4431818 | 0.1860465 |
| ENSG00000244694 |            | 0.49090909 |            | 0.490909091 |             |           | 0.2383721 |
| ENSG00000165209 |            | 0.15454545 |            | 0.154545455 |             |           | 0.1453488 |
| ENSG00000110900 |            | 0.49090909 |            | 0.490909091 |             |           | 0.4767442 |
| ENSG00000173699 |            | 0.44848485 |            | 0.448484848 |             |           | 0.4767442 |
| ENSG00000236882 |            | 0.27439024 |            | 0.274390244 |             |           | 0.0697674 |
| ENSG00000241685 |            | 0.06363636 |            | 0.063636364 |             |           |           |
| ENSG00000061337 |            | 0.44705882 |            | 0.447058824 |             |           | 0.4069767 |
| ENSG00000096088 |            | 0.06976744 |            | 0.069767442 |             |           |           |
| ENSG00000132872 |            | 0.27439024 |            | 0.274390244 |             |           | 0.4235294 |
| ENSG00000101255 |            |            |            |             |             |           | 0.122093  |
| ENSG00000253457 |            | 0.34662577 |            | 0.346625767 |             |           | 0.375     |
| ENSG00000116120 | 0.23952096 | 0.36969697 | 0.23952096 | 0.36969697  | 0.488888889 | 0.4156627 | 0.3977273 |
| ENSG00000168772 |            | 0.38953488 |            | 0.389534884 |             |           | 0.3522727 |

|                 |            |            |            |             |             |           |           |
|-----------------|------------|------------|------------|-------------|-------------|-----------|-----------|
| ENSG00000171735 |            | 0.18404908 |            | 0.18404908  |             |           | 0.3294118 |
| ENSG00000111011 |            | 0.23619632 |            | 0.236196319 |             |           | 0.0941176 |
| ENSG00000197168 | 0.27272727 | 0.3        | 0.27272727 | 0.3         | 0.422222222 | 0.4651163 | 0.4651163 |
| ENSG00000167468 |            | 0.44242424 |            | 0.442424242 |             |           | 0.3941176 |
| ENSG00000103546 | 0.25449102 | 0.13030303 | 0.25449102 | 0.13030303  | 0.297619048 | 0.3662791 | 0.1802326 |
| ENSG00000071242 | 0.48888889 | 0.35151515 | 0.48888889 | 0.351515152 | 0.3         | 0.2777778 | 0.1918605 |
| ENSG00000198624 | 0.38333333 | 0.45757576 | 0.38333333 | 0.457575758 | 0.344444444 | 0.4333333 | 0.4333333 |
| ENSG00000112715 | 0.06287425 | 0.43030303 | 0.06287425 | 0.43030303  | 0.095238095 | 0.1529412 | 0.1511628 |
| ENSG00000078618 | 0.22777778 |            | 0.22777778 |             | 0.159090909 | 0.1927711 |           |
| ENSG00000172292 |            | 0.32012195 |            | 0.320121951 |             |           | 0.4411765 |
| ENSG00000175634 |            | 0.47272727 |            | 0.472727273 |             |           | 0.2727273 |
| ENSG00000170044 | 0.07777778 | 0.38636364 | 0.07777778 | 0.386363636 |             |           | 0.1627907 |
| ENSG00000138115 |            | 0.18012422 |            | 0.180124224 |             |           | 0.3941176 |
| ENSG00000153395 |            | 0.3        |            | 0.3         |             |           | 0.4821429 |
| ENSG00000170289 | 0.17777778 | 0.26666667 | 0.17777778 | 0.266666667 | 0.133333333 |           | 0.4244186 |
| ENSG00000145040 |            |            |            |             |             |           | 0.1104651 |
| ENSG00000122584 |            | 0.33333333 |            | 0.333333333 |             |           | 0.1511628 |
| ENSG00000204572 |            | 0.42727273 |            | 0.427272727 |             |           | 0.3546512 |
| ENSG00000130383 | 0.43888889 | 0.18333333 | 0.43888889 | 0.183333333 | 0.122222222 | 0.255814  | 0.1333333 |
| ENSG00000183960 |            |            |            |             |             |           | 0.2151163 |
| ENSG00000107262 |            | 0.11818182 |            | 0.118181818 |             |           | 0.2209302 |
| ENSG00000158985 | 0.45481928 |            | 0.45481928 |             |             |           |           |
| ENSG00000089060 |            | 0.1402439  |            | 0.140243902 |             |           | 0.2616279 |
| ENSG00000015676 |            | 0.23529412 |            | 0.235294118 | 0.066666667 |           |           |
| ENSG00000155085 | 0.31437126 | 0.38484848 | 0.31437126 | 0.384848485 | 0.329545455 | 0.2777778 | 0.372093  |
| ENSG00000164296 | 0.34730539 | 0.14242424 | 0.34730539 | 0.142424242 | 0.22972973  | 0.2195122 | 0.1022727 |
| ENSG00000135974 | 0.18975904 | 0.05617978 | 0.18975904 | 0.056179775 | 0.138554217 | 0.2093023 |           |
| ENSG00000167748 | 0.20786517 |            | 0.20786517 |             | 0.2         | 0.3111111 |           |
| ENSG00000154342 |            | 0.2962963  |            | 0.296296296 |             |           | 0.2034884 |
| ENSG00000120314 | 0.43413174 | 0.41818182 | 0.43413174 | 0.418181818 | 0.445121951 | 0.4651163 | 0.4886364 |
| ENSG00000196611 |            | 0.34545455 |            | 0.345454545 |             | 0.0872093 | 0.4111111 |
| ENSG00000164087 |            | 0.15454545 |            | 0.154545455 |             |           | 0.494186  |
| ENSG00000137124 |            | 0.36363636 |            | 0.363636364 |             |           | 0.494186  |
| ENSG00000198715 |            | 0.26666667 |            | 0.266666667 |             |           | 0.2209302 |
| ENSG00000214338 | 0.27245509 | 0.44444444 | 0.27245509 | 0.444444444 | 0.095238095 | 0.1511628 | 0.3372093 |
| ENSG00000005471 | 0.31437126 |            | 0.31437126 |             |             |           |           |
| ENSG00000180245 |            | 0.18292683 |            | 0.182926829 |             |           | 0.4176471 |
| ENSG00000180346 | 0.20359281 | 0.22222222 | 0.20359281 | 0.222222222 | 0.19047619  | 0.1802326 | 0.2159091 |
| ENSG00000255310 | 0.20114943 | 0.40909091 | 0.20114943 | 0.409090909 |             | 0.0769231 |           |
| ENSG00000152219 | 0.48630137 | 0.13636364 | 0.48630137 | 0.136363636 | 0.342105263 | 0.3780488 | 0.4189189 |
| ENSG00000185272 |            | 0.39240506 |            | 0.392405063 |             |           | 0.4705882 |
| ENSG00000006607 |            | 0.23030303 |            | 0.23030303  |             |           | 0.4011628 |
| ENSG00000088782 |            |            |            |             | 0.464285714 | 0.4883721 |           |
| ENSG00000107864 |            | 0.3030303  |            | 0.303030303 |             |           | 0.4360465 |
| ENSG00000205777 |            | 0.42424242 |            | 0.424242424 |             |           | 0.1627907 |
| ENSG00000154451 |            | 0.44382022 |            | 0.443820225 | 0.277108434 | 0.3095238 | 0.2386364 |
| ENSG00000180011 |            | 0.49079755 |            | 0.490797546 | 0.452380952 | 0.4883721 | 0.4588235 |
| ENSG00000116793 |            | 0.23636364 |            | 0.236363636 |             |           | 0.4294118 |
| ENSG00000170085 |            | 0.18181818 |            | 0.181818182 |             |           | 0.1807229 |
| ENSG00000081026 | 0.13333333 | 0.29393939 | 0.13333333 | 0.293939394 | 0.311111111 | 0.4886364 | 0.1411765 |
| ENSG00000150477 |            | 0.24848485 |            | 0.248484848 |             |           | 0.4534884 |
| ENSG00000101000 |            | 0.44252874 |            | 0.442528736 |             |           | 0.2727273 |
| ENSG00000143315 | 0.12275449 | 0.06666667 | 0.12275449 | 0.066666667 |             |           | 0.3352941 |
| ENSG00000134265 |            | 0.38888889 |            | 0.388888889 |             |           | 0.4634146 |

|                 |            |            |            |             |             |           |           |
|-----------------|------------|------------|------------|-------------|-------------|-----------|-----------|
| ENSG00000224361 | 0.26646707 |            | 0.26646707 |             |             |           |           |
| ENSG00000179915 | 0.06896552 | 0.27222222 | 0.06896552 | 0.27222222  | 0.318181818 | 0.2674419 | 0.3888889 |
| ENSG00000241119 |            | 0.22777778 |            | 0.22777778  |             |           | 0.1590909 |
| ENSG00000144407 |            | 0.20909091 |            | 0.209090909 |             |           | 0.4117647 |
| ENSG00000129353 |            | 0.39393939 |            | 0.393939394 |             |           | 0.3529412 |
| ENSG00000167077 | 0.30838323 | 0.20909091 | 0.30838323 | 0.209090909 | 0.136904762 | 0.3255814 |           |
| ENSG00000143226 |            | 0.49390244 |            | 0.493902439 |             |           | 0.2710843 |
| ENSG00000135776 |            | 0.17948718 |            | 0.179487179 |             |           | 0.0609756 |
| ENSG00000168894 |            | 0.23125    |            | 0.23125     | 0.05        |           | 0.3546512 |
| ENSG00000198860 |            | 0.07575758 |            | 0.075757576 |             |           |           |
| ENSG00000165810 |            | 0.4847561  |            | 0.484756098 |             |           | 0.4302326 |
| ENSG00000196979 | 0.40419162 | 0.08333333 | 0.40419162 | 0.083333333 | 0.386904762 | 0.2383721 | 0.2666667 |
| ENSG00000185507 | 0.11666667 |            | 0.11666667 |             | 0.055555556 |           |           |
| ENSG00000165792 | 0.13173653 | 0.22121212 | 0.13173653 | 0.221212121 | 0.18452381  | 0.2267442 | 0.2674419 |
| ENSG00000196917 |            | 0.38181818 |            | 0.381818182 |             |           | 0.494186  |
| ENSG00000102030 |            | 0.21296296 |            | 0.212962963 |             |           | 0.3546512 |
| ENSG00000076356 |            | 0.37931034 |            | 0.379310345 |             |           | 0.3895349 |
| ENSG00000117154 |            | 0.42727273 |            | 0.427272727 |             |           | 0.3081395 |
| ENSG00000117519 |            | 0.08181818 |            | 0.081818182 |             |           |           |
| ENSG00000172955 |            | 0.47272727 |            | 0.472727273 |             |           | 0.0988372 |
| ENSG00000139697 |            | 0.13030303 |            | 0.13030303  |             |           | 0.2674419 |
| ENSG00000204120 | 0.25149701 | 0.29444444 | 0.25149701 | 0.294444444 | 0.31547619  | 0.2848837 | 0.3295455 |
| ENSG00000120262 |            | 0.44848485 |            | 0.448484848 |             |           | 0.377907  |
| ENSG00000140511 |            | 0.09090909 |            | 0.090909091 |             |           | 0.1470588 |
| ENSG00000166049 | 0.12222222 | 0.26829268 | 0.12222222 | 0.268292683 |             |           | 0.0697674 |
| ENSG00000168936 |            | 0.36363636 |            | 0.363636364 |             |           | 0.3313953 |
| ENSG00000204311 |            | 0.1030303  |            | 0.103030303 |             |           |           |
| ENSG00000115524 |            | 0.30674847 |            | 0.306748466 |             |           | 0.2831325 |
| ENSG00000143333 |            | 0.4127907  |            | 0.412790698 |             |           | 0.372093  |
| ENSG00000180901 |            | 0.1954023  |            | 0.195402299 | 0.18452381  | 0.2321429 | 0.4204545 |
| ENSG00000185361 |            | 0.49431818 |            | 0.494318182 |             |           | 0.2647059 |
| ENSG00000169919 |            | 0.45757576 |            | 0.457575758 |             |           | 0.1785714 |
| ENSG00000168765 | 0.25280899 |            | 0.25280899 |             | 0.363636364 | 0.375     |           |
| ENSG00000258850 | 0.20359281 |            | 0.20359281 |             | 0.290697674 | 0.2738095 |           |
| ENSG00000138386 | 0.20180723 |            | 0.20180723 |             | 0.351190476 | 0.3372093 |           |
| ENSG00000118113 | 0.15868263 | 0.49085366 | 0.15868263 | 0.490853659 | 0.422619048 | 0.3953488 | 0.3953488 |
| ENSG00000143179 |            | 0.42727273 |            | 0.427272727 |             |           | 0.25      |
| ENSG00000007541 |            | 0.47272727 |            | 0.472727273 |             |           | 0.3243243 |
| ENSG00000112273 | 0.07865169 | 0.34482759 | 0.07865169 | 0.344827586 |             |           | 0.2325581 |
| ENSG00000184857 |            | 0.46060606 |            | 0.460606061 |             |           | 0.5       |
| ENSG00000010610 |            | 0.45705521 |            | 0.457055215 |             |           | 0.4883721 |
| ENSG00000174243 |            | 0.45151515 |            | 0.451515152 |             |           | 0.3662791 |
| ENSG00000171862 |            | 0.36196319 |            | 0.36196319  |             |           | 0.4058824 |
| ENSG00000101542 | 0.42215569 | 0.08045977 | 0.42215569 | 0.08045977  | 0.19047619  | 0.1395349 | 0.4431818 |
| ENSG00000137818 | 0.05172414 |            | 0.05172414 |             |             |           |           |
| ENSG00000127804 | 0.13473054 | 0.33333333 | 0.13473054 | 0.333333333 |             |           | 0.3352941 |
| ENSG00000151881 | 0.32335329 |            | 0.32335329 |             | 0.083333333 | 0.1627907 | 0.0666667 |
| ENSG00000136630 | 0.30681818 | 0.15454545 | 0.30681818 | 0.154545455 | 0.415662651 | 0.3764706 |           |
| ENSG00000121578 | 0.27777778 | 0.16292135 | 0.27777778 | 0.162921348 | 0.4         | 0.2954545 | 0.2222222 |
| ENSG00000205356 |            | 0.3445122  |            | 0.344512195 |             |           | 0.4825581 |
| ENSG00000132716 |            |            |            |             |             |           | 0.0523256 |
| ENSG00000011600 |            |            |            |             |             |           | 0.122093  |
| ENSG00000136522 | 0.14457831 |            | 0.14457831 |             | 0.148809524 | 0.122093  | 0.122093  |
| ENSG00000129317 |            | 0.08787879 |            | 0.087878788 |             |           |           |



|                 |            |            |            |             |             |           |           |
|-----------------|------------|------------|------------|-------------|-------------|-----------|-----------|
| ENSG00000108523 |            | 0.18965517 |            | 0.189655172 |             |           | 0.5       |
| ENSG00000110148 | 0.38095238 | 0.38787879 | 0.38095238 | 0.387878788 |             |           | 0.4       |
| ENSG00000132522 | 0.35628743 | 0.37575758 | 0.35628743 | 0.375757576 | 0.054216867 | 0.0755814 |           |
| ENSG00000150527 |            |            |            |             |             | 0.060241  |           |
| ENSG00000122696 |            |            |            |             |             |           | 0.1022727 |
| ENSG00000035681 |            | 0.33435583 |            | 0.334355828 |             |           | 0.2093023 |
| ENSG00000125485 |            | 0.24848485 |            | 0.248484848 | 0.339285714 | 0.5       | 0.4186047 |
| ENSG00000049541 |            | 0.05757576 |            | 0.057575758 |             |           | 0.0930233 |
| ENSG00000184863 | 0.33233533 | 0.42727273 | 0.33233533 | 0.427272727 | 0.337349398 | 0.3235294 | 0.3313953 |
| ENSG00000116809 | 0.05120482 |            | 0.05120482 |             |             |           |           |
| ENSG00000130997 |            | 0.12195122 |            | 0.12195122  |             |           | 0.2267442 |
| ENSG00000168743 |            | 0.39506173 |            | 0.395061728 |             |           | 0.172619  |
| ENSG00000132383 |            | 0.35454545 |            | 0.354545455 |             |           | 0.4767442 |
| ENSG00000105298 | 0.20786517 | 0.43636364 | 0.20786517 | 0.436363636 |             |           | 0.3372093 |
| ENSG00000129003 |            | 0.39570552 |            | 0.395705521 |             |           | 0.1411765 |
| ENSG00000229450 |            | 0.23636364 |            | 0.236363636 |             |           | 0.4011628 |
| ENSG00000197822 | 0.06626506 | 0.05974843 | 0.06626506 | 0.059748428 | 0.136904762 | 0.2383721 |           |
| ENSG00000165661 |            | 0.48787879 |            | 0.487878788 |             |           | 0.5       |
| ENSG00000248713 |            | 0.32515337 |            | 0.325153374 |             |           | 0.3023256 |
| ENSG00000166896 |            | 0.39939024 |            | 0.399390244 |             |           | 0.1802326 |
| ENSG00000165219 | 0.43712575 | 0.49695122 | 0.43712575 | 0.49695122  | 0.422619048 | 0.4411765 | 0.5       |
| ENSG00000214248 | 0.37724551 |            | 0.37724551 |             | 0.273809524 | 0.4186047 |           |
| ENSG00000153064 | 0.48203593 | 0.18787879 | 0.48203593 | 0.187878788 | 0.494047619 | 0.3953488 | 0.2383721 |
| ENSG00000139546 |            | 0.13690476 |            | 0.136904762 |             |           | 0.1046512 |
| ENSG00000119866 |            | 0.43636364 |            | 0.436363636 |             |           |           |
| ENSG00000121775 |            | 0.06402439 |            | 0.06402439  |             |           | 0.1705882 |
| ENSG00000078328 |            | 0.48787879 |            | 0.487878788 |             |           | 0.2906977 |
| ENSG00000164904 | 0.38719512 | 0.46629213 | 0.38719512 | 0.466292135 |             |           | 0.5       |
| ENSG00000105143 | 0.28443114 | 0.3045977  | 0.28443114 | 0.304597701 | 0.06547619  |           | 0.3255814 |
| ENSG00000173065 |            |            |            |             |             |           | 0.1190476 |
| ENSG00000123560 | 0.29041916 |            | 0.29041916 |             | 0.351190476 | 0.3837209 |           |
| ENSG00000186446 | 0.39520958 | 0.35454545 | 0.39520958 | 0.354545455 | 0.113095238 | 0.1046512 | 0.1136364 |
| ENSG00000111845 | 0.30555556 |            | 0.30555556 |             |             |           |           |
| ENSG00000042753 |            | 0.18181818 |            | 0.181818182 |             |           |           |
| ENSG00000007944 |            | 0.21515152 |            | 0.215151515 |             |           | 0.3023256 |
| ENSG00000134686 | 0.33939394 | 0.37777778 | 0.33939394 | 0.377777778 | 0.273809524 | 0.2325581 | 0.3511905 |
| ENSG00000077092 |            | 0.08484848 |            | 0.084848485 |             |           | 0.2034884 |
| ENSG00000240694 | 0.16766467 | 0.44545455 | 0.16766467 | 0.445454545 |             |           | 0.3372093 |
| ENSG00000167578 | 0.12424242 | 0.43292683 | 0.12424242 | 0.432926829 | 0.220238095 | 0.2906977 | 0.2790698 |
| ENSG00000132744 | 0.26646707 |            | 0.26646707 |             | 0.220238095 | 0.2732558 |           |
| ENSG00000232258 |            | 0.28651685 |            | 0.286516854 |             |           |           |
| ENSG00000188782 |            | 0.25280899 |            | 0.252808989 |             |           | 0.1453488 |
| ENSG00000135951 | 0.24698795 | 0.28484848 | 0.24698795 | 0.284848485 | 0.31547619  | 0.372093  | 0.1162791 |
| ENSG00000178828 |            |            |            |             |             |           | 0.2383721 |
| ENSG00000167004 |            | 0.29444444 |            | 0.294444444 |             |           | 0.4659091 |
| ENSG00000174899 |            | 0.35454545 |            | 0.354545455 |             |           | 0.2142857 |
| ENSG00000105677 |            | 0.36666667 |            | 0.366666667 |             |           | 0.4360465 |
| ENSG00000134817 | 0.05688623 | 0.33030303 | 0.05688623 | 0.33030303  | 0.19047619  | 0.3081395 | 0.4651163 |
| ENSG00000101974 |            |            |            |             |             |           | 0.3197674 |
| ENSG00000140548 |            | 0.35882353 |            | 0.358823529 |             |           | 0.3522727 |
| ENSG00000084073 |            | 0.06969697 |            | 0.06969697  |             |           | 0.2151163 |
| ENSG00000171055 | 0.42771084 | 0.35454545 | 0.42771084 | 0.354545455 | 0.458333333 | 0.3604651 | 0.2325581 |
| ENSG00000248746 |            |            |            |             |             |           | 0.1918605 |
| ENSG00000163221 |            | 0.09090909 |            | 0.090909091 |             |           | 0.0639535 |

|                 |            |            |            |             |             |           |           |
|-----------------|------------|------------|------------|-------------|-------------|-----------|-----------|
| ENSG00000198563 | 0.48235294 | 0.21646341 | 0.48235294 | 0.216463415 | 0.433333333 | 0.4204545 | 0.0988372 |
| ENSG00000141013 |            | 0.40853659 |            | 0.408536585 |             |           | 0.3604651 |
| ENSG00000243725 |            | 0.48787879 |            | 0.487878788 |             |           | 0.125     |
| ENSG00000118217 |            | 0.46363636 |            | 0.463636364 |             |           | 0.4772727 |
| ENSG00000184056 | 0.11445783 | 0.13888889 | 0.11445783 | 0.138888889 |             | 0.0568182 | 0.4659091 |
| ENSG00000178821 | 0.46604938 |            | 0.46604938 |             | 0.225       |           |           |
| ENSG00000198740 |            | 0.48484848 |            | 0.484848485 |             |           | 0.4011628 |
| ENSG00000135625 |            | 0.05031447 |            | 0.050314465 |             |           | 0.4883721 |
| ENSG00000138757 |            | 0.18181818 |            | 0.181818182 |             |           | 0.1162791 |
| ENSG00000226180 |            | 0.14545455 |            | 0.145454545 |             |           | 0.1627907 |
| ENSG00000215883 | 0.16566265 | 0.09333333 | 0.16566265 | 0.093333333 | 0.202380952 | 0.2906977 | 0.2965116 |
| ENSG00000047932 | 0.24251497 | 0.47575758 | 0.24251497 | 0.475757576 | 0.196428571 | 0.2294118 | 0.3488372 |
| ENSG00000140326 |            | 0.2208589  |            | 0.220858896 |             |           | 0.2674419 |
| ENSG00000142867 | 0.21385542 | 0.49386503 | 0.21385542 | 0.493865031 | 0.306818182 | 0.2954545 | 0.4244186 |
| ENSG00000187288 |            | 0.19090909 |            | 0.190909091 |             |           | 0.3895349 |
| ENSG00000149633 | 0.15662651 | 0.47222222 | 0.15662651 | 0.472222222 | 0.214285714 | 0.3023256 | 0.494186  |
| ENSG00000147679 |            | 0.15151515 |            | 0.151515152 |             |           | 0.3409091 |
| ENSG00000154975 |            | 0.48888889 |            | 0.488888889 |             |           | 0.3636364 |
| ENSG00000156471 |            | 0.40606061 |            | 0.406060606 |             |           | 0.3546512 |
| ENSG00000146085 |            | 0.36060606 |            | 0.360606061 |             |           | 0.4011628 |
| ENSG00000162458 |            | 0.39751553 |            | 0.397515528 |             |           | 0.2906977 |
| ENSG00000013374 |            | 0.21515152 |            | 0.215151515 |             |           | 0.4127907 |
| ENSG00000135698 |            | 0.37222222 |            | 0.372222222 |             |           | 0.3888889 |
| ENSG00000187720 |            | 0.36363636 |            | 0.363636364 |             |           | 0.4244186 |
| ENSG00000198650 |            | 0.35555556 |            | 0.355555556 |             |           | 0.2954545 |
| ENSG00000168005 |            | 0.48484848 |            | 0.484848485 |             |           | 0.3081395 |
| ENSG00000197930 | 0.26666667 | 0.10606061 | 0.26666667 | 0.106060606 | 0.162790698 | 0.2159091 | 0.1918605 |
| ENSG00000072736 | 0.18263473 | 0.11585366 | 0.18263473 | 0.115853659 |             |           | 0.1395349 |
| ENSG00000112096 | 0.38622754 | 0.43939394 | 0.38622754 | 0.439393939 | 0.154761905 | 0.1802326 | 0.4651163 |
| ENSG00000173113 | 0.23493976 |            | 0.23493976 |             | 0.130952381 | 0.122093  |           |
| ENSG00000129194 | 0.12874251 |            | 0.12874251 |             |             |           |           |
| ENSG00000143469 |            | 0.35714286 |            | 0.357142857 |             |           | 0.4659091 |
| ENSG00000105392 | 0.31736527 | 0.42424242 | 0.31736527 | 0.424242424 |             |           | 0.1453488 |
| ENSG00000134121 |            | 0.23312883 |            | 0.233128834 |             |           | 0.2619048 |
| ENSG00000119596 |            | 0.23780488 |            | 0.237804878 |             |           | 0.3035714 |
| ENSG00000121871 |            | 0.07575758 |            | 0.075757576 |             |           |           |
| ENSG00000121542 | 0.48203593 | 0.18888889 | 0.48203593 | 0.188888889 | 0.255952381 | 0.25      | 0.1222222 |
| ENSG00000148680 |            | 0.2        |            | 0.2         |             |           | 0.3081395 |
| ENSG00000175792 | 0.2439759  | 0.24712644 | 0.2439759  | 0.247126437 | 0.111111111 | 0.1704545 | 0.0872093 |
| ENSG00000141642 |            | 0.38181818 |            | 0.381818182 |             |           | 0.3837209 |
| ENSG00000214575 |            |            |            |             | 0.244047619 | 0.2034884 |           |
| ENSG00000173262 | 0.29651163 | 0.42121212 | 0.29651163 | 0.421212121 | 0.271604938 | 0.3571429 | 0.255814  |
| ENSG00000197496 |            | 0.39877301 |            | 0.398773006 |             |           | 0.4698795 |
| ENSG00000163697 | 0.13772455 | 0.36890244 | 0.13772455 | 0.368902439 |             | 0.0523256 | 0.127907  |
| ENSG00000006282 | 0.24137931 | 0.31666667 | 0.24137931 | 0.316666667 | 0.095238095 | 0.1       | 0.1       |
| ENSG00000135318 | 0.05688623 | 0.34545455 | 0.05688623 | 0.345454545 |             |           | 0.3470588 |
| ENSG00000188051 |            | 0.44545455 |            | 0.445454545 |             |           | 0.3837209 |
| ENSG00000149554 | 0.35227273 | 0.49438202 | 0.35227273 | 0.494382022 | 0.428571429 | 0.3452381 | 0.3571429 |
| ENSG00000181036 |            | 0.16969697 |            | 0.16969697  |             |           | 0.127907  |
| ENSG00000146070 | 0.15909091 |            | 0.15909091 |             | 0.144444444 | 0.2386364 |           |
| ENSG00000172724 |            |            |            |             |             |           | 0.1104651 |
| ENSG00000104361 |            | 0.49390244 |            | 0.493902439 |             |           | 0.3895349 |
| ENSG00000161243 |            | 0.32727273 |            | 0.327272727 |             |           | 0.5       |
| ENSG00000132010 |            | 0.12424242 |            | 0.124242424 |             |           | 0.2383721 |

|                 |            |            |            |             |             |           |           |
|-----------------|------------|------------|------------|-------------|-------------|-----------|-----------|
| ENSG00000138050 |            | 0.46666667 |            | 0.46666667  |             |           | 0.2383721 |
| ENSG00000167202 |            | 0.26219512 |            | 0.26219512  |             |           | 0.3895349 |
| ENSG00000179057 |            | 0.40243902 |            | 0.40243902  |             |           | 0.1104651 |
| ENSG00000080819 |            | 0.32424242 |            | 0.32424242  |             |           | 0.377907  |
| ENSG00000135114 |            | 0.19207317 |            | 0.19207317  |             |           | 0.0872093 |
| ENSG00000182318 |            |            |            |             |             |           | 0.0930233 |
| ENSG00000180917 |            | 0.11515152 |            | 0.115151515 |             |           | 0.4404762 |
| ENSG00000145194 |            | 0.28125    |            | 0.28125     |             |           | 0.4825581 |
| ENSG00000204531 | 0.24850299 | 0.47272727 | 0.24850299 | 0.472727273 | 0.386904762 | 0.4767442 | 0.5       |
| ENSG00000106636 |            | 0.06666667 |            | 0.06666667  |             |           |           |
| ENSG00000164619 |            | 0.32926829 |            | 0.329268293 |             |           | 0.2823529 |
| ENSG00000087087 | 0.49700599 | 0.48787879 | 0.49700599 | 0.487878788 | 0.428571429 | 0.4476744 | 0.2       |
| ENSG00000118507 |            |            |            |             |             |           | 0.2790698 |
| ENSG00000147488 | 0.0508982  | 0.12424242 | 0.0508982  | 0.124242424 |             |           | 0.0872093 |
| ENSG00000185100 |            | 0.40909091 |            | 0.409090909 | 0.363095238 | 0.4418605 | 0.4418605 |
| ENSG00000150681 | 0.17771084 |            | 0.17771084 |             | 0.317073171 | 0.3023256 |           |
| ENSG00000143127 |            | 0.15555556 |            | 0.15555556  |             |           | 0.125     |
| ENSG00000130749 |            | 0.34756098 |            | 0.347560976 |             |           | 0.2710843 |
| ENSG00000005810 | 0.32934132 |            | 0.32934132 |             | 0.455555556 | 0.4709302 |           |
| ENSG00000125375 | 0.46706587 | 0.44512195 | 0.46706587 | 0.445121951 | 0.404761905 | 0.3430233 | 0.3430233 |
| ENSG00000238243 | 0.09337349 | 0.30182927 | 0.09337349 | 0.301829268 | 0.166666667 | 0.1046512 | 0.4883721 |
| ENSG00000254999 |            | 0.13333333 |            | 0.133333333 |             |           |           |
| ENSG00000204963 |            | 0.05151515 |            | 0.051515152 |             |           | 0.1162791 |
| ENSG00000086548 |            | 0.43636364 |            | 0.436363636 |             |           | 0.494186  |
| ENSG00000163812 |            | 0.47865854 |            | 0.478658537 |             |           | 0.1104651 |
| ENSG00000135763 |            | 0.48773006 |            | 0.487730061 |             |           | 0.4058824 |
| ENSG00000122783 |            | 0.46875    |            | 0.46875     |             |           | 0.3882353 |
| ENSG00000171530 |            | 0.44444444 |            | 0.444444444 |             |           | 0.4888889 |
| ENSG00000099999 |            | 0.22222222 |            | 0.222222222 |             |           |           |
| ENSG00000162399 | 0.47727273 | 0.41975309 | 0.47727273 | 0.419753086 | 0.409090909 | 0.4534884 | 0.2045455 |
| ENSG00000161395 |            | 0.29874214 |            | 0.298742138 |             |           | 0.4705882 |
| ENSG00000167131 | 0.06287425 | 0.33030303 | 0.06287425 | 0.33030303  | 0.05952381  | 0.127907  | 0.2034884 |
| ENSG00000215704 |            | 0.21515152 |            | 0.215151515 |             |           | 0.4883721 |
| ENSG00000085563 | 0.05688623 | 0.47878788 | 0.05688623 | 0.478787879 | 0.071428571 | 0.0581395 | 0.4593023 |
| ENSG00000100095 | 0.28742515 | 0.48757764 | 0.28742515 | 0.48757764  |             |           | 0.0666667 |
| ENSG00000259518 |            | 0.38719512 |            | 0.387195122 |             |           | 0.2151163 |
| ENSG00000112029 |            | 0.17777778 |            | 0.177777778 |             |           | 0.1818182 |
| ENSG00000172156 |            | 0.23030303 |            | 0.23030303  |             |           | 0.0595238 |
| ENSG00000160014 |            | 0.49390244 |            | 0.493902439 |             |           | 0.4647059 |
| ENSG00000143033 |            | 0.18333333 |            | 0.183333333 |             |           |           |
| ENSG00000123360 | 0.39820359 | 0.48484848 | 0.39820359 | 0.484848485 | 0.30952381  | 0.3488372 | 0.4886364 |
| ENSG00000222040 |            | 0.31818182 |            | 0.318181818 |             |           | 0.3895349 |
| ENSG00000204577 |            | 0.30379747 |            | 0.303797468 |             |           | 0.2840909 |
| ENSG00000132793 | 0.28143713 | 0.16969697 | 0.28143713 | 0.16969697  |             |           |           |
| ENSG00000076248 | 0.23888889 |            | 0.23888889 |             | 0.107142857 | 0.175     |           |
| ENSG00000127362 |            |            |            |             | 0.279761905 | 0.2267442 |           |
| ENSG00000104714 | 0.2875     | 0.42222222 | 0.2875     | 0.422222222 | 0.104651163 | 0.1511628 | 0.4767442 |
| ENSG00000184481 |            |            |            |             |             |           | 0.1235294 |
| ENSG00000154611 |            |            |            |             |             |           | 0.2093023 |
| ENSG00000158220 |            | 0.42378049 |            | 0.423780488 |             |           | 0.4418605 |
| ENSG00000179097 |            | 0.39393939 |            | 0.393939394 |             |           | 0.3546512 |
| ENSG00000163141 | 0.33532934 | 0.2        | 0.33532934 | 0.2         |             |           | 0.0930233 |
| ENSG00000205846 | 0.37724551 |            | 0.37724551 |             |             |           |           |
| ENSG00000138029 |            | 0.08333333 |            | 0.083333333 |             |           | 0.1704545 |

|                 |            |            |            |             |             |           |            |
|-----------------|------------|------------|------------|-------------|-------------|-----------|------------|
| ENSG00000112280 | 0.23333333 | 0.44848485 | 0.23333333 | 0.448484848 |             |           | 0.3895349  |
| ENSG00000135454 | 0.38023952 | 0.25914634 | 0.38023952 | 0.259146341 | 0.172619048 | 0.1046512 | 0.1453488  |
| ENSG00000134453 | 0.10542169 | 0.13030303 | 0.10542169 | 0.13030303  |             |           | 0.077381   |
| ENSG0000004455  |            | 0.28484848 |            | 0.284848485 |             |           | 0.3837209  |
| ENSG00000077782 |            | 0.26666667 |            | 0.266666667 |             |           | 0.3895349  |
| ENSG00000073670 |            | 0.3969697  |            | 0.396969697 |             |           | 0.1976744  |
| ENSG00000173947 |            | 0.43902439 |            | 0.43902439  |             |           | 0.4651163  |
| ENSG00000165688 |            | 0.34756098 |            | 0.347560976 | 0.125       | 0.1104651 | 0.1686047  |
| ENSG00000119760 | 0.1257485  | 0.40184049 | 0.1257485  | 0.401840491 |             |           | 0.0892857  |
| ENSG00000080166 | 0.11676647 |            | 0.11676647 |             |             |           |            |
| ENSG00000125462 |            | 0.20552147 |            | 0.205521472 |             |           | 0.3139535  |
| ENSG00000213420 |            | 0.44242424 |            | 0.442424242 |             |           | 0.2647059  |
| ENSG00000138964 |            | 0.32317073 |            | 0.323170732 |             |           | 0.4883721  |
| ENSG00000120756 | 0.19161677 |            | 0.19161677 |             | 0.410714286 | 0.4       | 0.0697674  |
| ENSG00000215472 | 0.26347305 |            | 0.26347305 |             | 0.119047619 |           |            |
| ENSG00000157330 | 0.36666667 | 0.31212121 | 0.36666667 | 0.312121212 | 0.06547619  | 0.0988372 | 0.3        |
| ENSG00000105136 | 0.30838323 | 0.2969697  | 0.30838323 | 0.296969697 | 0.36746988  | 0.3604651 | 0.255814   |
| ENSG00000166847 |            | 0.20121951 |            | 0.201219512 |             |           | 0.4011628  |
| ENSG00000167632 |            | 0.13836478 |            | 0.13836478  |             |           | 0.1488095  |
| ENSG00000151466 |            | 0.19090909 |            | 0.190909091 |             |           | 0.2093023  |
| ENSG00000129480 |            | 0.42528736 |            | 0.425287356 |             |           | 0.3953488  |
| ENSG00000048028 |            | 0.20909091 |            | 0.209090909 |             |           | 0.1860465  |
| ENSG00000188993 |            | 0.27743902 |            | 0.277439024 |             |           | 0.3546512  |
| ENSG00000138036 |            | 0.3        |            | 0.3         | 0.191358025 | 0.1294118 | 0.127907   |
| ENSG00000159674 |            | 0.07222222 |            | 0.072222222 |             |           | 0.11111111 |
| ENSG00000164076 | 0.30538922 | 0.4695122  | 0.30538922 | 0.469512195 | 0.113095238 | 0.1802326 | 0.1918605  |
| ENSG00000256870 |            | 0.38650307 |            | 0.386503067 |             |           | 0.2        |
| ENSG00000170209 |            | 0.16060606 |            | 0.160606061 |             |           | 0.4011628  |
| ENSG00000166106 |            | 0.22777778 |            | 0.227777778 |             |           | 0.3295455  |
| ENSG00000184708 |            | 0.41818182 |            | 0.418181818 |             |           |            |
| ENSG00000127399 | 0.4702381  |            | 0.4702381  |             | 0.26744186  | 0.4268293 | 0.1125     |
| ENSG00000106415 |            | 0.47272727 |            | 0.472727273 |             |           | 0.4709302  |
| ENSG00000073060 |            | 0.28658537 |            | 0.286585366 |             |           | 0.4756098  |
| ENSG00000168079 | 0.38253012 | 0.43251534 | 0.38253012 | 0.432515337 | 0.403614458 | 0.3333333 | 0.4941176  |
| ENSG00000111266 |            | 0.05194805 |            | 0.051948052 |             |           | 0.1931818  |
| ENSG00000185950 |            | 0.29885057 |            | 0.298850575 |             |           | 0.4772727  |
| ENSG00000196591 | 0.11666667 | 0.46202532 | 0.11666667 | 0.462025316 | 0.268292683 | 0.3658537 | 0.3392857  |
| ENSG00000170091 | 0.28742515 | 0.29447853 | 0.28742515 | 0.294478528 |             |           | 0.125      |
| ENSG00000129071 |            | 0.05757576 |            | 0.057575758 |             |           |            |
| ENSG00000206549 | 0.49700599 |            | 0.49700599 |             | 0.15        | 0.1428571 |            |
| ENSG00000198668 |            | 0.39655172 |            | 0.396551724 |             |           | 0.4940476  |
| ENSG00000204147 | 0.15       | 0.15555556 | 0.15       | 0.155555556 | 0.088888889 | 0.1       | 0.1        |
| ENSG00000145495 |            | 0.10606061 |            | 0.106060606 |             |           | 0.3430233  |
| ENSG00000164329 |            | 0.18787879 |            | 0.187878788 |             |           | 0.2267442  |
| ENSG00000047578 |            | 0.14942529 |            | 0.149425287 |             |           |            |
| ENSG00000067167 |            | 0.17222222 |            | 0.172222222 |             |           | 0.2621951  |
| ENSG00000214046 |            | 0.10606061 |            | 0.106060606 |             |           | 0.2790698  |
| ENSG00000100628 | 0.2994012  | 0.15757576 | 0.2994012  | 0.157575758 | 0.392857143 | 0.3488372 | 0.4709302  |
| ENSG00000100395 |            | 0.33333333 |            | 0.333333333 |             |           | 0.4418605  |
| ENSG00000170681 | 0.26666667 | 0.05       | 0.26666667 | 0.05        | 0.111111111 | 0.0568182 | 0.1666667  |
| ENSG00000121989 |            | 0.43888889 |            | 0.438888889 |             |           | 0.1162791  |
| ENSG00000108669 |            | 0.4244186  |            | 0.424418605 |             |           | 0.3409091  |
| ENSG00000119912 | 0.39939024 |            | 0.39939024 |             | 0.125       | 0.2771084 |            |
| ENSG00000172053 |            | 0.11890244 |            | 0.118902439 |             |           | 0.0872093  |

|                 |            |            |            |             |             |           |           |
|-----------------|------------|------------|------------|-------------|-------------|-----------|-----------|
| ENSG00000163132 |            | 0.25151515 |            | 0.251515152 |             |           | 0.4476744 |
| ENSG00000101888 |            | 0.34848485 |            | 0.348484848 |             |           | 0.1395349 |
| ENSG00000108759 | 0.17065868 |            | 0.17065868 |             | 0.34939759  | 0.3035714 |           |
| ENSG00000149489 | 0.25625    |            | 0.25625    |             |             |           |           |
| ENSG00000154165 |            |            |            |             | 0.154761905 | 0.2267442 |           |
| ENSG00000070371 |            | 0.48787879 |            | 0.487878788 |             |           | 0.2267442 |
| ENSG00000166090 | 0.13173653 | 0.28963415 | 0.13173653 | 0.289634146 | 0.30952381  | 0.1860465 | 0.1802326 |
| ENSG00000163840 |            | 0.31818182 |            | 0.318181818 |             |           | 0.5       |
| ENSG00000107014 | 0.18333333 |            | 0.18333333 |             |             |           |           |
| ENSG00000181562 | 0.12275449 |            | 0.12275449 |             |             |           |           |
| ENSG00000006047 |            | 0.35454545 |            | 0.354545455 |             |           | 0.3139535 |
| ENSG00000132819 |            | 0.22424242 |            | 0.224242424 |             |           |           |
| ENSG00000072195 | 0.11676647 | 0.48787879 | 0.11676647 | 0.487878788 | 0.30952381  | 0.377907  | 0.4069767 |
| ENSG00000132591 |            | 0.20606061 |            | 0.206060606 |             |           | 0.4244186 |
| ENSG00000038945 | 0.44011976 | 0.23636364 | 0.44011976 | 0.236363636 | 0.130952381 | 0.0872093 | 0.5       |
| ENSG00000135374 |            | 0.5        |            | 0.5         |             |           | 0.4883721 |
| ENSG00000168813 | 0.49438202 | 0.46969697 | 0.49438202 | 0.46969697  | 0.466666667 | 0.3977273 | 0.5       |
| ENSG00000184012 |            | 0.16969697 |            | 0.16969697  |             |           | 0.4767442 |
| ENSG00000177239 |            | 0.46666667 |            | 0.466666667 |             |           | 0.3139535 |
| ENSG00000170017 | 0.15568862 | 0.17878788 | 0.15568862 | 0.178787879 | 0.148809524 | 0.1569767 | 0.1627907 |
| ENSG00000053372 | 0.40419162 | 0.23333333 | 0.40419162 | 0.233333333 | 0.178571429 | 0.1627907 | 0.1590909 |
| ENSG00000077063 |            | 0.06896552 |            | 0.068965517 |             |           |           |
| ENSG00000099250 | 0.36144578 | 0.49444444 | 0.36144578 | 0.494444444 | 0.488095238 | 0.452381  | 0.5       |
| ENSG00000183813 |            | 0.1030303  |            | 0.103030303 |             |           | 0.372093  |
| ENSG00000108691 |            | 0.31212121 |            | 0.312121212 |             |           | 0.372093  |
| ENSG00000107147 |            | 0.32424242 |            | 0.324242424 |             |           | 0.4418605 |
| ENSG00000211829 |            | 0.17378049 |            | 0.173780488 |             |           |           |
| ENSG00000170619 | 0.31034483 | 0.37272727 | 0.31034483 | 0.372727273 | 0.267857143 | 0.372093  | 0.4302326 |
| ENSG00000155090 |            | 0.47878788 |            | 0.478787879 |             |           | 0.494186  |
| ENSG00000149292 | 0.28143713 | 0.48170732 | 0.28143713 | 0.481707317 | 0.482142857 | 0.4186047 | 0.0823529 |
| ENSG00000145990 |            | 0.48181818 |            | 0.481818182 |             |           | 0.3222222 |
| ENSG00000101298 |            | 0.44047619 |            | 0.44047619  |             |           | 0.4647059 |
| ENSG00000147669 |            | 0.19444444 |            | 0.194444444 |             |           | 0.0795455 |
| ENSG00000250584 | 0.13772455 |            | 0.13772455 |             | 0.215909091 | 0.0988372 |           |
| ENSG00000151632 | 0.14772727 | 0.24242424 | 0.14772727 | 0.242424242 |             |           |           |
| ENSG00000144891 | 0.06886228 |            | 0.06886228 |             | 0.226190476 | 0.1744186 |           |
| ENSG00000111046 | 0.20958084 | 0.39393939 | 0.20958084 | 0.393939394 |             |           | 0.255814  |
| ENSG00000121057 |            | 0.4969697  |            | 0.496969697 |             |           | 0.4302326 |
| ENSG00000131368 |            | 0.13803681 |            | 0.13803681  |             |           | 0.0988372 |
| ENSG00000110756 | 0.21686747 | 0.28787879 | 0.21686747 | 0.287878788 | 0.107142857 | 0.1764706 | 0.3941176 |
| ENSG00000013573 | 0.23595506 | 0.44753086 | 0.23595506 | 0.447530864 |             |           | 0.225     |
| ENSG00000188322 |            | 0.3        |            | 0.3         |             |           | 0.0588235 |
| ENSG00000220201 | 0.37777778 | 0.1030303  | 0.37777778 | 0.103030303 | 0.088888889 | 0.0568182 |           |
| ENSG00000163703 | 0.11976048 |            | 0.11976048 |             |             |           |           |
| ENSG00000165194 | 0.1626506  | 0.34848485 | 0.1626506  | 0.348484848 |             |           | 0.2142857 |
| ENSG00000114520 |            | 0.11046512 |            | 0.110465116 |             |           | 0.1764706 |
| ENSG00000124226 |            | 0.46363636 |            | 0.463636364 |             |           | 0.4285714 |
| ENSG00000120963 | 0.14444444 |            | 0.14444444 |             |             |           |           |
| ENSG00000159527 | 0.31626506 | 0.29411765 | 0.31626506 | 0.294117647 | 0.208333333 | 0.1569767 | 0.2045455 |
| ENSG00000182400 |            | 0.24848485 |            | 0.248484848 |             |           | 0.3895349 |
| ENSG00000182162 |            | 0.14906832 |            | 0.149068323 |             |           |           |
| ENSG00000184677 | 0.48802395 | 0.36666667 | 0.48802395 | 0.366666667 | 0.392857143 | 0.4476744 | 0.4476744 |
| ENSG00000175928 | 0.46407186 |            | 0.46407186 |             | 0.363095238 | 0.3895349 | 0.1395349 |
| ENSG00000185313 |            | 0.46060606 |            | 0.460606061 |             |           | 0.1860465 |

|                 |            |            |            |             |             |           |           |
|-----------------|------------|------------|------------|-------------|-------------|-----------|-----------|
| ENSG00000139197 |            | 0.425      |            | 0.425       | 0.196428571 | 0.2093023 | 0.3780488 |
| ENSG00000129116 | 0.2754491  | 0.34848485 | 0.2754491  | 0.348484848 | 0.369047619 | 0.4825581 | 0.1395349 |
| ENSG00000185651 |            | 0.18597561 |            | 0.18597561  |             |           | 0.4825581 |
| ENSG00000103496 | 0.3045977  |            | 0.3045977  |             |             | 0.0952381 |           |
| ENSG00000183814 |            | 0.38343558 |            | 0.383435583 |             |           | 0.4534884 |
| ENSG00000005238 | 0.20958084 |            | 0.20958084 |             | 0.380952381 | 0.3139535 |           |
| ENSG00000099814 | 0.33888889 |            | 0.33888889 |             | 0.166666667 | 0.127907  | 0.1627907 |
| ENSG00000185627 | 0.08682635 | 0.25151515 | 0.08682635 | 0.251515152 | 0.166666667 | 0.1860465 | 0.4772727 |
| ENSG00000176714 |            | 0.42405063 |            | 0.424050633 |             |           | 0.0662651 |
| ENSG00000092871 |            | 0.35454545 |            | 0.354545455 |             |           | 0.1931818 |
| ENSG00000204954 | 0.39444444 | 0.49393939 | 0.39444444 | 0.493939394 | 0.388888889 | 0.5       | 0.5       |
| ENSG00000127993 |            | 0.14242424 |            | 0.142424242 |             |           | 0.2411765 |
| ENSG00000171517 |            | 0.23030303 |            | 0.23030303  |             |           | 0.25      |
| ENSG00000134107 |            | 0.15757576 |            | 0.157575758 |             |           | 0.1569767 |
| ENSG00000154134 | 0.26807229 |            | 0.26807229 |             | 0.083333333 |           |           |
| ENSG00000155269 | 0.18562874 | 0.5        | 0.18562874 | 0.5         | 0.458333333 | 0.4825581 | 0.4642857 |
| ENSG00000136824 | 0.46407186 | 0.49393939 | 0.46407186 | 0.493939394 | 0.266666667 | 0.1363636 | 0.1511628 |
| ENSG00000255604 | 0.2005988  |            | 0.2005988  |             | 0.232142857 | 0.1686047 |           |
| ENSG00000164603 | 0.21111111 | 0.11666667 | 0.21111111 | 0.116666667 |             |           |           |
| ENSG00000180210 | 0.10555556 |            | 0.10555556 |             |             |           |           |
| ENSG00000171791 | 0.1        | 0.25153374 | 0.1        | 0.251533742 | 0.433333333 | 0.4318182 | 0.2906977 |
| ENSG00000170540 | 0.20180723 | 0.08181818 | 0.20180723 | 0.081818182 |             |           | 0.0755814 |
| ENSG00000121691 | 0.45       |            | 0.45       |             | 0.255555556 | 0.2666667 |           |
| ENSG00000129696 | 0.46111111 |            | 0.46111111 |             | 0.443181818 | 0.4940476 |           |
| ENSG00000198576 |            | 0.49691358 |            | 0.49691358  |             |           | 0.1705882 |
| ENSG00000184983 |            | 0.47878788 |            | 0.478787879 |             |           | 0.4593023 |
| ENSG00000146918 |            | 0.39393939 |            | 0.393939394 |             |           | 0.4825581 |
| ENSG00000196526 |            | 0.43939394 |            | 0.439393939 |             |           | 0.4360465 |
| ENSG00000130522 |            | 0.27272727 |            | 0.272727273 |             |           | 0.494186  |
| ENSG00000111605 |            | 0.40555556 |            | 0.405555556 |             |           | 0.3295455 |
| ENSG00000205740 |            | 0.43209877 |            | 0.432098765 |             |           | 0.3154762 |
| ENSG00000037280 |            | 0.09937888 |            | 0.099378882 | 0.154761905 | 0.122093  | 0.3928571 |
| ENSG00000177688 |            |            |            |             |             |           | 0.2692308 |
| ENSG00000178597 |            | 0.36969697 |            | 0.36969697  |             |           | 0.4825581 |
| ENSG00000103355 | 0.40060241 |            | 0.40060241 |             |             |           |           |
| ENSG00000173918 | 0.31736527 | 0.3        | 0.31736527 | 0.3         | 0.457831325 | 0.4529412 | 0.4759036 |
| ENSG00000179361 |            | 0.30909091 |            | 0.309090909 |             |           | 0.4593023 |
| ENSG00000205147 | 0.40449438 |            | 0.40449438 |             | 0.066666667 |           |           |
| ENSG00000105926 |            | 0.36666667 |            | 0.366666667 |             |           | 0.1627907 |
| ENSG00000044524 |            | 0.44242424 |            | 0.442424242 |             |           | 0.1337209 |
| ENSG00000205517 |            | 0.06748466 |            | 0.067484663 |             |           | 0.2650602 |
| ENSG00000114302 |            | 0.37272727 |            | 0.372727273 |             |           | 0.0872093 |
| ENSG00000064692 | 0.12777778 | 0.10606061 | 0.12777778 | 0.106060606 | 0.147727273 | 0.1111111 | 0.0872093 |
| ENSG00000083812 | 0.3        |            | 0.3        |             | 0.494047619 | 0.4593023 |           |
| ENSG00000066279 |            | 0.09393939 |            | 0.093939394 |             |           |           |
| ENSG00000197142 |            | 0.3030303  |            | 0.303030303 |             |           | 0.2941176 |
| ENSG00000151151 |            | 0.17222222 |            | 0.172222222 |             |           |           |
| ENSG00000197965 |            | 0.46987952 |            | 0.469879518 |             |           | 0.3546512 |
| ENSG00000198879 |            | 0.30909091 |            | 0.309090909 |             |           | 0.3662791 |
| ENSG00000211795 | 0.07777778 |            | 0.07777778 |             | 0.433333333 | 0.4444444 |           |
| ENSG00000239306 |            | 0.2        |            | 0.2         |             |           |           |
| ENSG00000137142 |            | 0.33333333 |            | 0.333333333 |             |           | 0.3604651 |
| ENSG00000117697 |            | 0.26666667 |            | 0.266666667 |             |           | 0.4302326 |
| ENSG00000065809 | 0.37724551 | 0.2        | 0.37724551 | 0.2         | 0.455555556 | 0.4216867 | 0.1625    |

|                 |            |            |            |             |             |           |           |
|-----------------|------------|------------|------------|-------------|-------------|-----------|-----------|
| ENSG0000072163  | 0.46875    |            | 0.46875    |             | 0.351190476 |           | 0.3023256 |
| ENSG00000143727 |            | 0.2969697  |            | 0.296969697 |             |           | 0.1686047 |
| ENSG00000196628 | 0.13473054 | 0.375      | 0.13473054 | 0.375       |             |           | 0.2383721 |
| ENSG00000138286 |            | 0.13636364 |            | 0.136363636 |             |           | 0.3555556 |
| ENSG00000180539 | 0.23888889 | 0.36890244 | 0.23888889 | 0.368902439 | 0.177777778 | 0.2613636 | 0.2093023 |
| ENSG00000172733 |            | 0.30909091 |            | 0.309090909 |             |           |           |
| ENSG00000131591 |            | 0.13030303 |            | 0.13030303  |             |           | 0.1352941 |
| ENSG00000073737 | 0.08982036 | 0.17222222 | 0.08982036 | 0.172222222 | 0.119047619 | 0.1860465 | 0.2727273 |
| ENSG00000189221 | 0.48493976 | 0.23333333 | 0.48493976 | 0.233333333 |             |           | 0.3068182 |
| ENSG00000143702 | 0.43636364 |            | 0.43636364 |             | 0.303571429 |           | 0.2267442 |
| ENSG00000160785 |            | 0.36309524 |            | 0.363095238 |             |           | 0.3295455 |
| ENSG00000106560 |            | 0.39939024 |            | 0.399390244 |             |           | 0.4235294 |
| ENSG00000183943 |            | 0.33231707 |            | 0.332317073 |             |           | 0.1941176 |
| ENSG00000196482 | 0.46706587 | 0.06666667 | 0.46706587 | 0.066666667 | 0.476190476 | 0.4709302 | 0.1802326 |
| ENSG00000172215 | 0.14371257 | 0.49090909 | 0.14371257 | 0.490909091 | 0.361445783 | 0.3764706 | 0.4709302 |
| ENSG00000170144 |            | 0.20555556 |            | 0.205555556 |             |           | 0.2613636 |
| ENSG00000173041 | 0.33333333 | 0.27878788 | 0.33333333 | 0.278787879 | 0.488095238 | 0.4825581 | 0.3875    |
| ENSG00000099849 |            |            |            |             |             |           | 0.1744186 |
| ENSG00000161082 |            | 0.44242424 |            | 0.442424242 |             |           | 0.2383721 |
| ENSG00000214113 |            | 0.44520548 |            | 0.445205479 |             |           | 0.2666667 |
| ENSG00000100625 |            | 0.26363636 |            | 0.263636364 |             |           | 0.3662791 |
| ENSG00000196236 |            | 0.47575758 |            | 0.475757576 |             |           | 0.0813953 |
| ENSG00000185946 |            | 0.35454545 |            | 0.354545455 |             |           | 0.3139535 |
| ENSG00000164535 |            | 0.46969697 |            | 0.46969697  |             |           | 0.3895349 |
| ENSG00000115616 |            | 0.27987421 |            | 0.279874214 |             |           | 0.1569767 |
| ENSG00000160209 |            | 0.49090909 |            | 0.490909091 |             |           | 0.4588235 |
| ENSG00000205670 |            | 0.46604938 |            | 0.466049383 |             |           | 0.4011628 |
| ENSG00000197591 | 0.4        |            | 0.4        |             |             |           |           |
| ENSG00000142405 | 0.27844311 | 0.11280488 | 0.27844311 | 0.112804878 | 0.386904762 | 0.3662791 | 0.0755814 |
| ENSG00000133101 |            |            |            |             | 0.144444444 |           | 0.1136364 |
| ENSG00000173153 |            |            |            |             | 0.147727273 |           |           |
| ENSG00000188732 |            | 0.30674847 |            | 0.306748466 |             |           | 0.327381  |
| ENSG00000185686 | 0.40697674 |            | 0.40697674 |             | 0.211111111 | 0.3068182 | 0.3373494 |
| ENSG00000104723 |            | 0.28181818 |            | 0.281818182 |             |           | 0.2965116 |
| ENSG00000168958 | 0.48850575 |            | 0.48850575 |             | 0.3         | 0.255814  | 0.4886364 |
| ENSG00000171970 | 0.43258427 |            | 0.43258427 |             | 0.255555556 |           | 0.1477273 |
| ENSG00000121807 |            | 0.23636364 |            | 0.236363636 |             |           | 0.2616279 |
| ENSG00000114120 | 0.17964072 | 0.08333333 | 0.17964072 | 0.083333333 | 0.214285714 | 0.2151163 | 0.2727273 |
| ENSG00000164010 | 0.46706587 | 0.17272727 | 0.46706587 | 0.172727273 | 0.380952381 | 0.4186047 | 0.1744186 |
| ENSG00000137474 | 0.15361446 |            | 0.15361446 |             | 0.494047619 | 0.494186  |           |
| ENSG00000111667 |            |            |            |             |             |           | 0.3255814 |
| ENSG00000177697 | 0.33233533 | 0.29878049 | 0.33233533 | 0.298780488 | 0.125       | 0.1627907 | 0.4127907 |
| ENSG00000176692 |            |            |            |             |             |           | 0.1022727 |
| ENSG00000163362 | 0.16111111 |            | 0.16111111 |             | 0.144444444 | 0.2045455 |           |
| ENSG00000137656 |            | 0.07777778 |            | 0.077777778 |             |           | 0.1627907 |
| ENSG00000103249 |            | 0.5        |            | 0.5         |             |           | 0.2093023 |
| ENSG00000125482 | 0.48802395 |            | 0.48802395 |             | 0.463855422 | 0.4702381 |           |
| ENSG00000112514 | 0.23353293 |            | 0.23353293 |             | 0.053571429 | 0.0523256 |           |
| ENSG00000150526 |            | 0.41477273 |            | 0.414772727 |             |           | 0.4883721 |
| ENSG00000105339 | 0.4760479  | 0.43939394 | 0.4760479  | 0.439393939 | 0.43452381  | 0.4186047 | 0.4244186 |
| ENSG00000072415 | 0.39457831 | 0.07777778 | 0.39457831 | 0.077777778 | 0.363095238 | 0.4941176 | 0.4772727 |
| ENSG00000106617 |            | 0.35454545 |            | 0.354545455 |             |           | 0.2529412 |
| ENSG00000139977 |            | 0.11818182 |            | 0.118181818 |             |           | 0.0930233 |
| ENSG00000162804 |            | 0.37272727 |            | 0.372727273 |             |           | 0.4772727 |

|                 |            |            |            |             |             |           |           |
|-----------------|------------|------------|------------|-------------|-------------|-----------|-----------|
| ENSG00000178734 | 0.07185629 | 0.47852761 | 0.07185629 | 0.478527607 |             |           | 0.3777778 |
| ENSG00000104848 |            | 0.4969697  |            | 0.496969697 |             |           | 0.2790698 |
| ENSG00000162616 |            |            |            |             |             |           | 0.1309524 |
| ENSG00000204978 |            | 0.12727273 |            | 0.127272727 |             |           | 0.3372093 |
| ENSG00000253313 |            | 0.47878788 |            | 0.478787879 |             |           | 0.3488372 |
| ENSG00000170381 |            | 0.14444444 |            | 0.144444444 |             |           | 0.125     |
| ENSG00000258231 |            |            |            |             | 0.31547619  | 0.1802326 |           |
| ENSG00000204681 |            | 0.46103896 |            | 0.461038961 |             |           | 0.3023256 |
| ENSG00000124789 |            |            |            |             |             |           | 0.2848837 |
| ENSG00000071909 |            | 0.17682927 |            | 0.176829268 |             |           |           |
| ENSG00000182107 |            | 0.32727273 |            | 0.327272727 |             |           | 0.4883721 |
| ENSG00000175287 |            | 0.43030303 |            | 0.43030303  |             |           | 0.2151163 |
| ENSG00000104205 | 0.42168675 |            | 0.42168675 | 0.226190476 |             | 0.25      |           |
| ENSG00000175274 | 0.16666667 | 0.17272727 | 0.16666667 | 0.172727273 | 0.464285714 | 0.4011628 | 0.122093  |
| ENSG00000169991 |            | 0.05       |            | 0.05        |             |           | 0.0909091 |
| ENSG00000105419 |            | 0.1011236  |            | 0.101123596 |             |           |           |
| ENSG00000006634 | 0.1257485  | 0.1030303  | 0.1257485  | 0.103030303 | 0.06547619  | 0.0988372 | 0.2732558 |
| ENSG00000145332 |            | 0.42073171 |            | 0.420731707 |             |           | 0.4767442 |
| ENSG00000174125 | 0.16467066 |            | 0.16467066 | 0.464285714 |             | 0.4825581 |           |
| ENSG00000118017 | 0.4186747  |            | 0.4186747  | 0.404761905 |             | 0.4651163 |           |
| ENSG00000109684 | 0.31137725 | 0.46067416 | 0.31137725 | 0.460674157 | 0.363095238 | 0.4127907 | 0.4647059 |
| ENSG00000140030 | 0.06886228 |            | 0.06886228 |             |             |           |           |
| ENSG00000182141 |            | 0.31481481 |            | 0.314814815 |             |           | 0.3139535 |
| ENSG00000080298 | 0.20958084 | 0.26363636 | 0.20958084 | 0.263636364 |             |           | 0.4534884 |
| ENSG00000198478 |            | 0.34545455 |            | 0.345454545 |             |           | 0.494186  |
| ENSG00000221983 |            | 0.39090909 |            | 0.390909091 |             |           | 0.3430233 |
| ENSG00000155304 |            | 0.33939394 |            | 0.339393939 |             |           | 0.5       |
| ENSG00000186409 | 0.05555556 | 0.23636364 | 0.05555556 | 0.236363636 | 0.233333333 | 0.1363636 | 0.3662791 |
| ENSG00000183473 | 0.33333333 | 0.32822086 | 0.33333333 | 0.328220859 | 0.222222222 | 0.1428571 | 0.4487179 |
| ENSG00000211454 | 0.11494253 | 0.17987805 | 0.11494253 | 0.179878049 | 0.136363636 | 0.1162791 | 0.1235294 |
| ENSG00000145708 |            | 0.43251534 |            | 0.432515337 |             |           | 0.4651163 |
| ENSG00000142661 | 0.18862275 | 0.33030303 | 0.18862275 | 0.33030303  | 0.19047619  | 0.1453488 |           |
| ENSG00000179454 | 0.4494382  |            | 0.4494382  | 0.119047619 |             | 0.127907  |           |
| ENSG00000204038 | 0.10778443 |            | 0.10778443 | 0.494047619 |             | 0.494186  |           |
| ENSG00000109390 | 0.24712644 |            | 0.24712644 | 0.113636364 |             | 0.0714286 |           |
| ENSG00000143450 | 0.17065868 |            | 0.17065868 | 0.398809524 |             | 0.2588235 |           |
| ENSG00000123454 |            | 0.49090909 |            | 0.490909091 |             |           | 0.3       |
| ENSG00000130045 |            | 0.07575758 |            | 0.075757576 |             |           | 0.3197674 |
| ENSG00000145536 |            | 0.48837209 |            | 0.488372093 |             |           | 0.3589744 |
| ENSG00000127324 | 0.11077844 | 0.39444444 | 0.11077844 | 0.394444444 |             |           | 0.3409091 |
| ENSG00000165023 |            | 0.0862069  |            | 0.086206897 |             |           | 0.25      |
| ENSG00000145349 | 0.15030675 | 0.26969697 | 0.15030675 | 0.26969697  | 0.488095238 | 0.4767442 | 0.4302326 |
| ENSG00000177889 |            | 0.0969697  |            | 0.096969697 |             |           |           |
| ENSG00000182208 | 0.21666667 |            | 0.21666667 | 0.277777778 |             | 0.4777778 |           |
| ENSG00000130962 |            | 0.07575758 |            | 0.075757576 |             |           | 0.0639535 |
| ENSG00000137573 | 0.30538922 | 0.26751592 | 0.30538922 | 0.267515924 | 0.261904762 | 0.2732558 | 0.4069767 |
| ENSG00000255633 |            | 0.39325843 |            | 0.393258427 |             |           | 0.4431818 |
| ENSG00000130054 |            | 0.29573171 |            | 0.295731707 |             |           | 0.1823529 |
| ENSG00000185567 |            | 0.47575758 |            | 0.475757576 |             |           | 0.377907  |
| ENSG00000165071 |            | 0.46969697 |            | 0.46969697  |             |           | 0.3975904 |
| ENSG00000087253 | 0.07222222 | 0.5        | 0.07222222 | 0.5         | 0.222222222 | 0.2666667 | 0.3333333 |
| ENSG00000116171 |            | 0.10606061 |            | 0.106060606 |             |           | 0.4111111 |
| ENSG00000165929 | 0.19161677 | 0.08484848 | 0.19161677 | 0.084848485 | 0.470238095 | 0.4186047 | 0.0813953 |
| ENSG00000179010 |            | 0.16666667 |            | 0.16666667  |             |           | 0.0681818 |



|                |            |            |            |             |             |           |           |
|----------------|------------|------------|------------|-------------|-------------|-----------|-----------|
| ENSG0000087299 | 0.46706587 | 0.45454545 | 0.46706587 | 0.454545455 | 0.404761905 | 0.3430233 | 0.3294118 |
| ENSG0000198643 | 0.14204545 |            | 0.14204545 |             | 0.466666667 | 0.375     |           |
| ENSG0000175325 |            | 0.30606061 |            | 0.306060606 |             |           | 0.2732558 |
| ENSG0000160961 |            | 0.41818182 |            | 0.418181818 |             |           | 0.2840909 |
| ENSG0000091527 |            | 0.11585366 |            | 0.115853659 |             |           |           |
| ENSG0000141655 |            | 0.27439024 |            | 0.274390244 |             |           | 0.25      |
| ENSG0000010626 | 0.4        | 0.32727273 | 0.4        | 0.327272727 | 0.4         | 0.4886364 | 0.4767442 |
| ENSG0000184811 |            | 0.31460674 |            | 0.314606742 |             |           | 0.2616279 |
| ENSG0000181617 |            | 0.15030675 |            | 0.150306748 |             |           |           |
| ENSG0000120256 |            | 0.34545455 |            | 0.345454545 |             |           | 0.2267442 |
| ENSG0000140470 |            | 0.47272727 |            | 0.472727273 |             |           | 0.494186  |
| ENSG0000166250 |            | 0.2030303  |            | 0.203030303 |             |           | 0.4235294 |
| ENSG0000150760 |            | 0.49090909 |            | 0.490909091 |             |           | 0.3139535 |
| ENSG0000198805 | 0.24251497 | 0.06666667 | 0.24251497 | 0.066666667 | 0.208333333 | 0.2616279 |           |
| ENSG0000167377 | 0.37222222 |            | 0.37222222 |             | 0.25        | 0.3139535 |           |
| ENSG0000179564 |            | 0.15151515 |            | 0.151515152 |             |           | 0.4127907 |
| ENSG0000132801 |            | 0.05487805 |            | 0.054878049 |             |           | 0.1569767 |
| ENSG0000125386 |            | 0.06666667 |            | 0.066666667 |             |           | 0.1104651 |
| ENSG0000153551 |            | 0.19886364 |            | 0.198863636 |             |           | 0.4318182 |
| ENSG0000134917 |            | 0.07272727 |            | 0.072727273 |             |           | 0.1744186 |
| ENSG0000111671 |            |            |            |             | 0.226190476 | 0.1686047 | 0.1590909 |
| ENSG0000076043 | 0.25       |            | 0.25       |             | 0.380952381 | 0.4759036 |           |
| ENSG0000141579 | 0.3404908  |            | 0.3404908  |             | 0.083333333 | 0.0697674 |           |
| ENSG0000050030 |            | 0.07668712 |            | 0.076687117 |             |           |           |
| ENSG0000154227 |            | 0.36666667 |            | 0.366666667 |             |           | 0.4204545 |
| ENSG0000124786 |            | 0.45505618 |            | 0.45505618  |             |           | 0.4285714 |
| ENSG0000185038 | 0.1257485  |            | 0.1257485  |             |             |           |           |
| ENSG0000138311 |            | 0.23333333 |            | 0.233333333 |             |           | 0.1453488 |
| ENSG0000141295 |            | 0.14848485 |            | 0.148484848 |             |           | 0.0833333 |
| ENSG0000163380 |            |            |            |             |             |           | 0.377907  |
| ENSG0000175197 | 0.32934132 |            | 0.32934132 |             | 0.392857143 | 0.1395349 |           |
| ENSG0000174792 |            | 0.22424242 |            | 0.224242424 |             |           | 0.2732558 |
| ENSG0000116852 |            | 0.32022472 |            | 0.320224719 |             |           | 0.2272727 |
| ENSG0000244005 |            | 0.05757576 |            | 0.057575758 |             |           |           |
| ENSG0000157764 |            | 0.4375     |            | 0.4375      |             |           | 0.1136364 |
| ENSG0000093072 | 0.33433735 | 0.41666667 | 0.33433735 | 0.416666667 | 0.285714286 | 0.2034884 | 0.3068182 |
| ENSG0000151532 |            | 0.24242424 |            | 0.242424242 |             |           | 0.4244186 |
| ENSG0000115641 | 0.23053892 | 0.47878788 | 0.23053892 | 0.478787879 | 0.351190476 | 0.2325581 | 0.2616279 |
| ENSG0000164081 | 0.15555556 | 0.13719512 | 0.15555556 | 0.137195122 | 0.079545455 | 0.0813953 | 0.0639535 |
| ENSG0000129682 | 0.2        | 0.08895706 | 0.2        | 0.088957055 | 0.273809524 | 0.255814  |           |
| ENSG0000115306 |            | 0.32424242 |            | 0.324242424 |             |           | 0.4476744 |
| ENSG0000153563 | 0.48502994 | 0.14848485 | 0.48502994 | 0.148484848 | 0.119047619 | 0.1860465 | 0.1860465 |
| ENSG0000106853 |            | 0.08282209 |            | 0.082822086 |             |           | 0.2965116 |
| ENSG0000038210 |            | 0.42901235 |            | 0.429012346 |             |           | 0.3081395 |
| ENSG0000063244 | 0.23493976 | 0.24712644 | 0.23493976 | 0.247126437 | 0.470238095 | 0.4011628 | 0.4069767 |
| ENSG0000168787 |            | 0.5        |            | 0.5         |             |           | 0.3604651 |
| ENSG0000198843 |            | 0.35060976 |            | 0.350609756 |             |           | 0.439759  |
| ENSG0000164849 |            |            |            |             |             |           | 0.1918605 |
| ENSG0000204277 |            | 0.48314607 |            | 0.483146067 |             |           | 0.3372093 |
| ENSG0000110925 |            | 0.21590909 |            | 0.215909091 |             |           | 0.3636364 |
| ENSG0000116285 |            | 0.44545455 |            | 0.445454545 |             |           |           |
| ENSG0000146433 |            | 0.18333333 |            | 0.183333333 |             |           | 0.1333333 |
| ENSG0000132376 |            | 0.19393939 |            | 0.193939394 |             |           |           |
| ENSG0000113273 | 0.1626506  | 0.5        | 0.1626506  | 0.5         | 0.130952381 | 0.0963855 | 0.4411765 |

|                 |            |            |            |             |             |  |                     |
|-----------------|------------|------------|------------|-------------|-------------|--|---------------------|
| ENSG00000186971 |            | 0.43636364 |            | 0.436363636 |             |  | 0.3941176           |
| ENSG00000186231 | 0.12874251 |            | 0.12874251 |             | 0.095238095 |  | 0.0581395           |
| ENSG00000100012 |            | 0.41515152 |            | 0.415151515 | 0.122222222 |  | 0.125 0.4127907     |
| ENSG00000068654 | 0.13173653 | 0.28181818 | 0.13173653 | 0.281818182 | 0.172619048 |  | 0.2034884 0.4666667 |
| ENSG00000154856 |            | 0.42727273 |            | 0.427272727 |             |  | 0.3662791           |
| ENSG00000111276 | 0.40718563 | 0.35151515 | 0.40718563 | 0.351515152 | 0.470238095 |  | 0.4883721 0.1802326 |
| ENSG00000100604 |            | 0.27272727 |            | 0.272727273 |             |  | 0.2954545           |
| ENSG00000177599 |            | 0.31790123 |            | 0.317901235 |             |  | 0.3409091           |
| ENSG00000198909 |            | 0.31818182 |            | 0.318181818 |             |  |                     |
| ENSG00000184903 | 0.1257485  | 0.33536585 | 0.1257485  | 0.335365854 | 0.5         |  | 0.4709302 0.2411765 |
| ENSG00000105323 | 0.39090909 | 0.15730337 | 0.39090909 | 0.157303371 | 0.363095238 |  | 0.255814            |
| ENSG00000124177 |            | 0.31818182 |            | 0.318181818 |             |  | 0.372093            |
| ENSG00000105383 |            | 0.46060606 |            | 0.460606061 |             |  | 0.2209302           |
| ENSG00000092067 | 0.17065868 |            | 0.17065868 |             | 0.232142857 |  | 0.4360465           |
| ENSG00000091513 | 0.28409091 | 0.12424242 | 0.28409091 | 0.124242424 | 0.277777778 |  | 0.244186 0.2267442  |
| ENSG00000235718 | 0.4760479  | 0.18888889 | 0.4760479  | 0.188888889 | 0.244047619 |  | 0.2352941 0.0681818 |
| ENSG00000171819 |            |            |            |             |             |  | 0.0872093           |
| ENSG00000106688 |            | 0.32777778 |            | 0.327777778 |             |  | 0.1590909           |
| ENSG00000166987 | 0.33233533 |            | 0.33233533 |             |             |  |                     |
| ENSG00000258961 |            | 0.14242424 |            | 0.142424242 |             |  | 0.122093            |
| ENSG00000130811 |            | 0.44827586 |            | 0.448275862 |             |  | 0.4431818           |
| ENSG00000253309 |            | 0.12804878 |            | 0.12804878  | 0.088888889 |  | 0.1333333 0.2650602 |
| ENSG00000117174 |            | 0.36060606 |            | 0.360606061 |             |  | 0.4883721           |
| ENSG00000230797 | 0.31736527 | 0.23595506 | 0.31736527 | 0.235955056 | 0.351190476 |  | 0.4 0.4659091       |
| ENSG00000183569 |            | 0.06818182 |            | 0.068181818 |             |  | 0.3928571           |
| ENSG00000198471 |            | 0.38181818 |            | 0.381818182 |             |  | 0.3255814           |
| ENSG00000170264 |            | 0.32727273 |            | 0.327272727 |             |  | 0.2987805           |
| ENSG00000147588 |            | 0.30909091 |            | 0.309090909 |             |  | 0.372093            |
| ENSG00000227706 |            | 0.42424242 |            | 0.424242424 |             |  | 0.1686047           |
| ENSG00000093009 |            |            |            |             |             |  | 0.0705882           |
| ENSG00000166741 | 0.49096386 | 0.19393939 | 0.49096386 | 0.193939394 | 0.416666667 |  | 0.4825581 0.0988372 |
| ENSG00000100138 |            | 0.3969697  |            | 0.396969697 |             |  | 0.2790698           |
| ENSG00000186792 | 0.19186047 |            | 0.19186047 |             | 0.386363636 |  | 0.4886364           |
| ENSG00000141279 |            |            |            |             |             |  | 0.1022727           |
| ENSG00000258838 | 0.12275449 |            | 0.12275449 |             | 0.306818182 |  | 0.3181818           |
| ENSG00000189298 |            | 0.3125     |            | 0.3125      |             |  | 0.2972973           |
| ENSG00000167695 |            | 0.32424242 |            | 0.324242424 |             |  | 0.1705882           |
| ENSG00000134245 | 0.12874251 | 0.27272727 | 0.12874251 | 0.272727273 |             |  | 0.4360465           |
| ENSG00000125207 | 0.14670659 | 0.42424242 | 0.14670659 | 0.424242424 | 0.077380952 |  | 0.1104651 0.372093  |
| ENSG00000166770 | 0.11676647 |            | 0.11676647 |             |             |  |                     |
| ENSG00000124201 |            | 0.30898876 |            | 0.308988764 |             |  | 0.2848837           |
| ENSG00000187959 |            | 0.23030303 |            | 0.23030303  |             |  | 0.1860465           |
| ENSG00000136205 | 0.49444444 | 0.43333333 | 0.49444444 | 0.433333333 | 0.466666667 |  | 0.3488372 0.4709302 |
| ENSG00000177058 | 0.375      | 0.36666667 | 0.375      | 0.366666667 | 0.433333333 |  | 0.5 0.5             |
| ENSG00000143190 | 0.37222222 | 0.49390244 | 0.37222222 | 0.493902439 |             |  | 0.2906977           |
| ENSG00000145604 |            |            |            |             |             |  | 0.377907            |
| ENSG00000197557 | 0.18263473 | 0.25       | 0.18263473 | 0.25        |             |  | 0.3222222           |
| ENSG00000254997 | 0.23030303 | 0.41954023 | 0.23030303 | 0.41954023  | 0.136904762 |  | 0.0988372 0.4476744 |
| ENSG00000182902 |            | 0.18965517 |            | 0.189655172 |             |  | 0.2954545           |
| ENSG00000167081 |            | 0.20909091 |            | 0.209090909 |             |  | 0.3647059           |
| ENSG00000156869 |            |            |            |             | 0.363095238 |  | 0.3662791           |
| ENSG00000146006 | 0.13855422 |            | 0.13855422 |             |             |  | 0.0755814           |
| ENSG00000085831 | 0.21556886 | 0.12777778 | 0.21556886 | 0.127777778 |             |  | 0.3068182           |
| ENSG00000164825 | 0.39520958 | 0.12424242 | 0.39520958 | 0.124242424 | 0.43452381  |  | 0.4764706 0.3197674 |

|                 |            |            |            |             |             |           |           |
|-----------------|------------|------------|------------|-------------|-------------|-----------|-----------|
| ENSG00000143401 |            | 0.06818182 |            | 0.068181818 |             |           |           |
| ENSG00000186318 | 0.11042945 | 0.44817073 | 0.11042945 | 0.448170732 | 0.311111111 | 0.3409091 | 0.1162791 |
| ENSG00000198818 | 0.23888889 |            | 0.23888889 |             |             |           |           |
| ENSG00000102898 |            | 0.15454545 |            | 0.154545455 |             |           | 0.0523256 |
| ENSG00000182993 |            | 0.18181818 |            | 0.181818182 |             |           |           |
| ENSG00000187258 | 0.15432099 | 0.36666667 | 0.15432099 | 0.366666667 | 0.122222222 | 0.2       | 0.2823529 |
| ENSG00000224453 |            | 0.33536585 |            | 0.335365854 |             |           | 0.4651163 |
| ENSG00000120658 | 0.22754491 | 0.41515152 | 0.22754491 | 0.415151515 | 0.19047619  | 0.1860465 | 0.4069767 |
| ENSG00000166716 |            | 0.24545455 |            | 0.245454545 |             |           | 0.4360465 |
| ENSG00000127946 |            | 0.43030303 |            | 0.43030303  |             |           | 0.0523256 |
| ENSG00000188343 |            | 0.31595092 |            | 0.31595092  |             |           | 0.4117647 |
| ENSG00000087077 |            | 0.48275862 |            | 0.482758621 |             |           | 0.4476744 |
| ENSG00000183571 | 0.5        |            | 0.5        |             |             | 0.0588235 |           |
| ENSG00000234719 | 0.09444444 |            | 0.09444444 |             |             |           |           |
| ENSG00000163026 |            | 0.47777778 |            | 0.477777778 |             |           | 0.1444444 |
| ENSG00000157570 | 0.17365269 | 0.49418605 | 0.17365269 | 0.494186047 | 0.119047619 | 0.1395349 | 0.4545455 |
| ENSG00000183160 |            | 0.11818182 |            | 0.118181818 | 0.158536585 | 0.1309524 | 0.2965116 |
| ENSG00000240344 |            | 0.13636364 |            | 0.136363636 |             |           |           |
| ENSG00000156414 |            | 0.45886076 |            | 0.458860759 |             |           | 0.4216867 |
| ENSG00000105388 |            | 0.42134831 |            | 0.421348315 |             |           | 0.2727273 |
| ENSG00000083844 |            | 0.37647059 |            | 0.376470588 |             |           | 0.3139535 |
| ENSG00000093144 | 0.18862275 | 0.39444444 | 0.18862275 | 0.394444444 | 0.077380952 | 0.1363636 |           |
| ENSG00000125841 |            | 0.1        |            | 0.1         |             |           |           |
| ENSG00000171124 | 0.08383234 | 0.39570552 | 0.08383234 | 0.395705521 |             |           | 0.3588235 |
| ENSG00000092850 |            | 0.0969697  |            | 0.096969697 |             |           |           |
| ENSG00000162998 |            | 0.44545455 |            | 0.445454545 |             |           | 0.1395349 |
| ENSG00000136052 |            | 0.15243902 |            | 0.152439024 |             |           | 0.244186  |
| ENSG00000120087 |            | 0.23939394 |            | 0.239393939 | 0.273809524 | 0.2383721 | 0.2616279 |
| ENSG00000139719 |            | 0.29938272 |            | 0.299382716 |             |           | 0.372093  |
| ENSG00000120833 | 0.38622754 | 0.23033708 | 0.38622754 | 0.230337079 | 0.220238095 | 0.1453488 | 0.4418605 |
| ENSG00000162542 |            | 0.18787879 |            | 0.187878788 |             |           | 0.4534884 |
| ENSG00000114805 | 0.07784431 | 0.11818182 | 0.07784431 | 0.118181818 | 0.464285714 | 0.4588235 |           |
| ENSG00000117500 |            | 0.28484848 |            | 0.284848485 |             |           | 0.372093  |
| ENSG00000158402 |            |            |            |             |             |           | 0.0697674 |
| ENSG00000178691 |            | 0.18333333 |            | 0.183333333 |             |           |           |
| ENSG00000154065 | 0.11666667 | 0.46111111 | 0.11666667 | 0.461111111 |             |           | 0.2267442 |
| ENSG00000204439 | 0.13772455 |            | 0.13772455 |             | 0.202380952 | 0.0988372 |           |
| ENSG00000154127 | 0.32335329 | 0.32941176 | 0.32335329 | 0.329411765 | 0.154761905 | 0.1569767 | 0.2823529 |
| ENSG00000155906 |            | 0.21511628 |            | 0.215116279 | 0.198795181 | 0.1470588 | 0.4659091 |
| ENSG00000137672 |            | 0.27272727 |            | 0.272727273 | 0.43902439  | 0.4625    | 0.2093023 |
| ENSG00000185842 |            | 0.38484848 |            | 0.384848485 |             |           | 0.2613636 |
| ENSG00000162688 | 0.48333333 | 0.484375   | 0.48333333 | 0.484375    | 0.386904762 | 0.4593023 | 0.4244186 |
| ENSG00000095139 |            | 0.16666667 |            | 0.166666667 |             |           | 0.4634146 |
| ENSG00000157191 |            | 0.11818182 |            | 0.118181818 |             |           |           |
| ENSG00000145911 |            | 0.26829268 |            | 0.268292683 |             |           | 0.2954545 |
| ENSG00000075891 | 0.26347305 |            | 0.26347305 |             |             |           | 0.1162791 |
| ENSG00000188305 |            | 0.33030303 |            | 0.33030303  |             |           | 0.4545455 |
| ENSG00000089094 |            | 0.08484848 |            | 0.084848485 |             |           | 0.1104651 |
| ENSG00000148377 |            | 0.20909091 |            | 0.209090909 |             |           | 0.2777778 |
| ENSG00000175262 |            | 0.32317073 |            | 0.323170732 |             |           | 0.2470588 |
| ENSG00000169710 | 0.45209581 | 0.44242424 | 0.45209581 | 0.442424242 | 0.192771084 | 0.1860465 | 0.2906977 |
| ENSG00000227392 |            | 0.45555556 |            | 0.455555556 |             |           | 0.3636364 |
| ENSG00000205476 | 0.44011976 | 0.39444444 | 0.44011976 | 0.394444444 |             |           | 0.4659091 |
| ENSG00000160218 | 0.25748503 | 0.18484848 | 0.25748503 | 0.184848485 | 0.226190476 | 0.3255814 | 0.3255814 |

|                 |            |            |            |             |             |  |           |
|-----------------|------------|------------|------------|-------------|-------------|--|-----------|
| ENSG00000159593 |            |            |            |             | 0.339285714 |  | 0.3882353 |
| ENSG00000135596 | 0.23493976 |            | 0.23493976 |             | 0.488095238 |  | 0.4588235 |
| ENSG00000124215 | 0.32934132 | 0.33333333 | 0.32934132 | 0.33333333  |             |  | 0.4767442 |
| ENSG00000149781 | 0.27840909 |            | 0.27840909 |             | 0.295454545 |  | 0.2272727 |
| ENSG00000184743 | 0.2245509  | 0.14545455 | 0.2245509  | 0.14545455  |             |  |           |
| ENSG00000188878 | 0.24719101 |            | 0.24719101 |             |             |  | 0.0777778 |
| ENSG00000112304 | 0.06586826 | 0.31402439 | 0.06586826 | 0.31402439  | 0.154761905 |  | 0.127907  |
| ENSG00000162980 |            | 0.1969697  |            | 0.196969697 |             |  | 0.3313953 |
| ENSG00000152484 |            | 0.42121212 |            | 0.421212121 |             |  | 0.494186  |
| ENSG00000135047 | 0.46706587 |            | 0.46706587 |             | 0.321428571 |  | 0.3823529 |
| ENSG00000164761 | 0.20786517 |            | 0.20786517 |             | 0.444444444 |  | 0.2848837 |
| ENSG00000186453 |            | 0.37272727 |            | 0.372727273 |             |  | 0.3181818 |
| ENSG00000146122 | 0.08083832 | 0.5        | 0.08083832 | 0.5         | 0.321428571 |  | 0.2325581 |
| ENSG00000147119 |            | 0.42121212 |            | 0.421212121 |             |  | 0.4534884 |
| ENSG00000183682 |            | 0.36060606 |            | 0.360606061 |             |  | 0.2790698 |
| ENSG00000106400 | 0.21556886 | 0.09444444 | 0.21556886 | 0.09444444  | 0.210843373 |  | 0.2325581 |
| ENSG00000118729 | 0.20987654 | 0.38050314 | 0.20987654 | 0.380503145 |             |  | 0.3546512 |
| ENSG00000079482 |            | 0.36060606 |            | 0.360606061 |             |  | 0.1453488 |
| ENSG00000142227 |            | 0.42727273 |            | 0.427272727 |             |  | 0.2470588 |
| ENSG00000138175 |            | 0.12222222 |            | 0.122222222 |             |  | 0.255814  |
| ENSG00000119917 |            | 0.48888889 |            | 0.488888889 |             |  | 0.2352941 |
| ENSG00000132823 | 0.33231707 | 0.28787879 | 0.33231707 | 0.287878788 | 0.488095238 |  | 0.4555556 |
| ENSG00000173482 | 0.40662651 |            | 0.40662651 |             | 0.144578313 |  | 0.1444444 |
| ENSG00000117682 | 0.48493976 | 0.2969697  | 0.48493976 | 0.296969697 | 0.321428571 |  | 0.4360465 |
| ENSG00000169045 | 0.34131737 |            | 0.34131737 |             | 0.261904762 |  | 0.1104651 |
| ENSG00000165694 |            | 0.37037037 |            | 0.37037037  |             |  | 0.2034884 |
| ENSG00000108405 |            | 0.37575758 |            | 0.375757576 |             |  | 0.3941176 |
| ENSG00000138193 | 0.49401198 | 0.11235955 | 0.49401198 | 0.112359551 | 0.494047619 |  | 0.0639535 |
| ENSG00000119950 |            | 0.46666667 |            | 0.466666667 |             |  | 0.1860465 |
| ENSG00000100994 |            | 0.48181818 |            | 0.481818182 |             |  | 0.4823529 |
| ENSG00000143633 |            | 0.22121212 |            | 0.221212121 |             |  | 0.1860465 |
| ENSG00000065882 | 0.40740741 | 0.35       | 0.40740741 | 0.35        | 0.398809524 |  | 0.4772727 |
| ENSG00000215014 |            | 0.34375    |            | 0.34375     |             |  | 0.0988372 |
| ENSG00000205221 | 0.2005988  |            | 0.2005988  |             |             |  | 0.3882353 |
| ENSG00000189308 |            | 0.27743902 |            | 0.277439024 |             |  | 0.4204545 |
| ENSG00000105173 |            | 0.25304878 |            | 0.25304878  |             |  | 0.3837209 |
| ENSG00000226800 |            |            |            |             |             |  | 0.1511628 |
| ENSG00000170180 | 0.45555556 | 0.47222222 | 0.45555556 | 0.472222222 | 0.488636364 |  | 0.1162791 |
| ENSG00000171136 |            |            |            |             | 0.134146341 |  | 0.0523256 |
| ENSG00000136720 |            | 0.23148148 |            | 0.231481481 |             |  | 0.1162791 |
| ENSG00000134198 |            | 0.47575758 |            | 0.475757576 |             |  | 0.1162791 |
| ENSG00000130638 |            | 0.12222222 |            | 0.122222222 |             |  | 0.4705882 |
| ENSG00000250641 |            |            |            |             |             |  | 0.4705882 |
| ENSG00000144671 | 0.07185629 |            | 0.07185629 |             | 0.136904762 |  | 0.4360465 |
| ENSG00000125398 |            | 0.37195122 |            | 0.37195122  |             |  | 0.4360465 |
| ENSG00000110768 | 0.05722892 | 0.35       | 0.05722892 | 0.35        | 0.452380952 |  | 0.4470588 |
| ENSG00000114757 | 0.23837209 | 0.37272727 | 0.23837209 | 0.372727273 | 0.160714286 |  | 0.3636364 |
| ENSG00000206199 | 0.21084337 | 0.44848485 | 0.21084337 | 0.448484848 | 0.154761905 |  | 0.1686047 |
| ENSG00000066027 |            | 0.35632184 |            | 0.356321839 |             |  | 0.255814  |
| ENSG00000183317 | 0.08333333 | 0.27222222 | 0.08333333 | 0.272222222 | 0.085714286 |  | 0.4767442 |
| ENSG00000205014 | 0.29885057 | 0.07738095 | 0.29885057 | 0.077380952 | 0.055555556 |  | 0.375     |
| ENSG00000100532 |            |            |            |             |             |  | 0.0625    |
| ENSG00000112619 |            | 0.29878049 |            | 0.298780488 |             |  | 0.1625    |
| ENSG00000188373 |            | 0.3        |            | 0.3         |             |  | 0.1511628 |

|                 |            |            |            |             |             |           |           |
|-----------------|------------|------------|------------|-------------|-------------|-----------|-----------|
| ENSG00000118432 | 0.47222222 | 0.25757576 | 0.47222222 | 0.257575758 | 0.375       | 0.3372093 | 0.494186  |
| ENSG00000132254 | 0.25555556 |            | 0.25555556 |             |             | 0.0555556 |           |
| ENSG00000168615 |            | 0.14117647 |            | 0.141176471 |             |           | 0.0909091 |
| ENSG00000133193 |            | 0.07272727 |            | 0.072727273 |             |           | 0.1744186 |
| ENSG00000109101 |            | 0.31111111 |            | 0.311111111 |             |           | 0.375     |
| ENSG00000127666 |            | 0.25757576 |            | 0.257575758 |             |           | 0.4593023 |
| ENSG00000174516 |            | 0.27575758 |            | 0.275757576 |             |           | 0.3081395 |
| ENSG00000181877 |            | 0.07926829 |            | 0.079268293 |             |           | 0.1104651 |
| ENSG00000172086 |            | 0.32022472 |            | 0.320224719 |             |           | 0.2383721 |
| ENSG00000196422 | 0.35628743 |            | 0.35628743 |             | 0.369047619 | 0.377907  | 0.4318182 |
| ENSG00000117791 |            |            |            |             |             |           | 0.0639535 |
| ENSG00000196935 | 0.06287425 | 0.43030303 | 0.06287425 | 0.43030303  |             |           | 0.2616279 |
| ENSG00000163359 |            | 0.11666667 |            | 0.116666667 |             |           | 0.1136364 |
| ENSG00000089154 |            | 0.43902439 |            | 0.43902439  |             |           | 0.4825581 |
| ENSG00000103202 | 0.32634731 | 0.3908046  | 0.32634731 | 0.390804598 |             | 0.1744186 | 0.4772727 |
| ENSG00000121060 |            | 0.4030303  |            | 0.403030303 |             |           | 0.2117647 |
| ENSG00000249158 |            | 0.05151515 |            | 0.051515152 |             |           | 0.1162791 |
| ENSG00000160593 | 0.25748503 | 0.39263804 | 0.25748503 | 0.392638037 | 0.279761905 | 0.2325581 | 0.3604651 |
| ENSG00000162944 |            | 0.3        |            | 0.3         |             |           | 0.4186047 |
| ENSG00000173452 |            | 0.22392638 |            | 0.22392638  |             |           | 0.5       |
| ENSG00000153802 |            | 0.1        |            | 0.1         |             |           | 0.2682927 |
| ENSG00000178338 |            | 0.12804878 |            | 0.12804878  |             |           |           |
| ENSG00000121552 |            | 0.15757576 |            | 0.157575758 |             |           | 0.3953488 |
| ENSG00000186472 |            | 0.49444444 |            | 0.494444444 |             |           | 0.4825581 |
| ENSG00000182352 | 0.48888889 | 0.48773006 | 0.48888889 | 0.487730061 | 0.1         | 0.3222222 | 0.3953488 |
| ENSG00000095370 | 0.25862069 |            | 0.25862069 |             | 0.066666667 |           |           |
| ENSG00000150244 |            |            |            |             |             |           | 0.1744186 |
| ENSG00000197601 | 0.18333333 | 0.14649682 | 0.18333333 | 0.146496815 |             |           | 0.3433735 |
| ENSG00000090104 |            | 0.08484848 |            | 0.084848485 |             |           |           |
| ENSG00000139291 |            | 0.14939024 |            | 0.149390244 | 0.470238095 | 0.4058824 | 0.4302326 |
| ENSG00000068745 | 0.28333333 | 0.11818182 | 0.28333333 | 0.118181818 |             |           |           |
| ENSG00000160049 |            |            |            |             |             |           | 0.2727273 |
| ENSG00000101670 |            | 0.06666667 |            | 0.066666667 |             |           | 0.4883721 |
| ENSG00000174640 |            | 0.22121212 |            | 0.221212121 |             |           | 0.4069767 |
| ENSG00000168026 |            | 0.3030303  |            | 0.303030303 |             |           | 0.2848837 |
| ENSG00000164122 |            | 0.20606061 |            | 0.206060606 |             |           | 0.1395349 |
| ENSG00000099992 | 0.08982036 | 0.13333333 | 0.08982036 | 0.133333333 | 0.125       | 0.0930233 | 0.3139535 |
| ENSG00000135365 |            | 0.27777778 |            | 0.277777778 |             |           |           |
| ENSG00000164916 | 0.30538922 | 0.0969697  | 0.30538922 | 0.096969697 | 0.119047619 | 0.0813953 | 0.0813953 |
| ENSG00000167716 |            | 0.25914634 |            | 0.259146341 | 0.133333333 | 0.1444444 | 0.4464286 |
| ENSG00000182871 |            | 0.39329268 |            | 0.393292683 |             |           | 0.4360465 |
| ENSG00000136732 | 0.47005988 | 0.26060606 | 0.47005988 | 0.260606061 | 0.428571429 | 0.2906977 | 0.3313953 |
| ENSG00000167323 | 0.4011976  | 0.11818182 | 0.4011976  | 0.118181818 | 0.476190476 | 0.494186  | 0.2325581 |
| ENSG00000233527 |            | 0.20909091 |            | 0.209090909 |             |           | 0.1569767 |
| ENSG00000226979 | 0.28443114 |            | 0.28443114 |             | 0.351190476 | 0.4476744 |           |
| ENSG00000135070 |            | 0.23295455 |            | 0.232954545 |             |           | 0.4431818 |
| ENSG00000113648 |            | 0.07575758 |            | 0.075757576 |             |           | 0.0523256 |
| ENSG00000171101 |            | 0.06969697 |            | 0.06969697  |             |           | 0.4767442 |
| ENSG00000152402 |            | 0.10909091 |            | 0.109090909 |             |           | 0.0795455 |
| ENSG00000017373 |            | 0.22121212 |            | 0.221212121 |             |           | 0.1162791 |
| ENSG00000241973 |            | 0.06134969 |            | 0.061349693 |             |           | 0.0523256 |
| ENSG00000117475 | 0.29819277 | 0.36060606 | 0.29819277 | 0.360606061 | 0.133333333 | 0.1569767 | 0.0639535 |
| ENSG00000240583 |            | 0.37575758 |            | 0.375757576 |             |           | 0.3895349 |
| ENSG00000012124 |            | 0.07575758 |            | 0.075757576 |             |           | 0.1569767 |



|                 |            |            |            |             |             |           |           |
|-----------------|------------|------------|------------|-------------|-------------|-----------|-----------|
| ENSG00000185875 |            | 0.27878788 |            | 0.278787879 |             |           | 0.494186  |
| ENSG00000125170 |            | 0.28484848 |            | 0.284848485 |             |           | 0.5       |
| ENSG00000145428 |            | 0.39090909 |            | 0.390909091 |             |           | 0.2616279 |
| ENSG00000116819 | 0.0988024  |            | 0.0988024  |             | 0.232142857 | 0.1744186 |           |
| ENSG00000176083 | 0.42168675 | 0.39090909 | 0.42168675 | 0.390909091 | 0.398809524 | 0.3662791 | 0.25      |
| ENSG00000137074 | 0.21111111 |            | 0.21111111 |             | 0.458333333 | 0.4011628 |           |
| ENSG00000047644 | 0.48333333 | 0.14848485 | 0.48333333 | 0.148484848 |             |           | 0.1046512 |
| ENSG00000174697 | 0.46407186 | 0.43333333 | 0.46407186 | 0.433333333 | 0.19047619  | 0.1918605 | 0.2616279 |
| ENSG00000020577 |            | 0.42727273 |            | 0.427272727 |             |           | 0.4235294 |
| ENSG00000183111 |            | 0.48787879 |            | 0.487878788 |             |           | 0.3081395 |
| ENSG00000178607 |            | 0.13068182 |            | 0.130681818 |             |           | 0.1818182 |
| ENSG00000115183 | 0.15568862 | 0.31515152 | 0.15568862 | 0.315151515 | 0.119047619 | 0.1627907 | 0.3529412 |
| ENSG00000180667 | 0.12048193 | 0.46067416 | 0.12048193 | 0.460674157 |             |           | 0.2272727 |
| ENSG00000150722 |            | 0.21348315 |            | 0.213483146 |             |           | 0.3111111 |
| ENSG00000183648 | 0.36826347 | 0.35151515 | 0.36826347 | 0.351515152 | 0.369047619 | 0.3546512 | 0.122093  |
| ENSG00000213699 |            | 0.33333333 |            | 0.333333333 |             |           | 0.3352941 |
| ENSG00000180828 |            | 0.08484848 |            | 0.084848485 |             |           |           |
| ENSG00000136856 |            | 0.42528736 |            | 0.425287356 |             |           | 0.0909091 |
| ENSG00000152578 |            | 0.48333333 |            | 0.483333333 |             |           | 0.4555556 |
| ENSG00000015133 |            | 0.19631902 |            | 0.196319018 |             |           | 0.3111111 |
| ENSG00000167085 | 0.27844311 | 0.17272727 | 0.27844311 | 0.172727273 | 0.119047619 | 0.2674419 | 0.4127907 |
| ENSG00000136059 |            | 0.15454545 |            | 0.154545455 |             |           |           |
| ENSG00000131979 | 0.1497006  | 0.26086957 | 0.1497006  | 0.260869565 |             | 0.0523256 | 0.4329268 |
| ENSG00000108256 |            | 0.20245399 |            | 0.202453988 |             |           | 0.4360465 |
| ENSG00000158008 | 0.06321839 | 0.35534591 | 0.06321839 | 0.355345912 | 0.085365854 | 0.0609756 | 0.1011905 |
| ENSG00000147324 |            | 0.43030303 |            | 0.43030303  |             |           | 0.1395349 |
| ENSG00000174227 | 0.45209581 | 0.24085366 | 0.45209581 | 0.240853659 | 0.244047619 | 0.3197674 | 0.3197674 |
| ENSG00000166734 |            |            |            |             |             |           | 0.127907  |
| ENSG00000109705 |            | 0.16060606 |            | 0.160606061 |             |           | 0.0639535 |
| ENSG00000197223 |            | 0.13333333 |            | 0.133333333 |             |           | 0.3181818 |
| ENSG00000163281 |            | 0.47222222 |            | 0.472222222 |             |           | 0.4333333 |
| ENSG00000140105 | 0.48502994 | 0.2247191  | 0.48502994 | 0.224719101 | 0.397590361 | 0.4476744 | 0.3488372 |
| ENSG00000150907 |            |            |            |             |             |           | 0.372093  |
| ENSG00000176894 |            | 0.42424242 |            | 0.424242424 |             |           | 0.2559524 |
| ENSG00000141499 |            | 0.23809524 |            | 0.238095238 |             | 0.0588235 | 0.3636364 |
| ENSG00000114107 |            | 0.30606061 |            | 0.306060606 |             |           | 0.4418605 |
| ENSG00000173786 |            | 0.23333333 |            | 0.233333333 |             |           | 0.4011628 |
| ENSG00000101452 | 0.10542169 | 0.18181818 | 0.10542169 | 0.181818182 | 0.107142857 | 0.1162791 | 0.122093  |
| ENSG00000162367 |            | 0.43030303 |            | 0.43030303  | 0.055555556 |           | 0.4534884 |
| ENSG00000051009 | 0.17222222 | 0.05757576 | 0.17222222 | 0.057575758 |             |           |           |
| ENSG00000162078 |            | 0.29393939 |            | 0.293939394 |             |           | 0.4011628 |
| ENSG00000172935 |            | 0.24842767 |            | 0.248427673 |             |           | 0.2738095 |
| ENSG00000110079 | 0.31402439 | 0.29393939 | 0.31402439 | 0.293939394 | 0.446428571 | 0.2764706 | 0.3139535 |
| ENSG00000151065 |            | 0.41111111 |            | 0.411111111 |             |           | 0.25      |
| ENSG00000105939 | 0.19662921 | 0.48787879 | 0.19662921 | 0.487878788 | 0.355555556 | 0.4090909 | 0.3295455 |
| ENSG00000068097 | 0.17613636 |            | 0.17613636 |             | 0.055555556 | 0.0681818 |           |
| ENSG00000250305 | 0.19760479 | 0.48181818 | 0.19760479 | 0.481818182 | 0.416666667 | 0.5       | 0.4011628 |
| ENSG00000137871 | 0.19578313 | 0.34545455 | 0.19578313 | 0.345454545 | 0.381578947 | 0.3882353 | 0.4883721 |
| ENSG00000134970 |            | 0.42331288 |            | 0.423312883 |             |           | 0.3977273 |
| ENSG00000170516 | 0.18562874 | 0.21111111 | 0.18562874 | 0.211111111 | 0.273809524 | 0.2848837 | 0.3068182 |
| ENSG00000100314 |            | 0.07575758 |            | 0.075757576 |             |           | 0.3895349 |
| ENSG00000167863 | 0.34431138 |            | 0.34431138 |             | 0.428571429 | 0.4127907 |           |
| ENSG00000175746 | 0.17664671 | 0.14848485 | 0.17664671 | 0.148484848 | 0.055555556 | 0.0555556 | 0.3197674 |
| ENSG00000100413 |            | 0.23619632 |            | 0.236196319 |             |           | 0.3430233 |

|                 |            |            |            |             |             |           |           |
|-----------------|------------|------------|------------|-------------|-------------|-----------|-----------|
| ENSG00000166507 |            | 0.37931034 |            | 0.379310345 |             | 0.0555556 | 0.4651163 |
| ENSG00000175414 |            | 0.45454545 |            | 0.454545455 |             |           | 0.4302326 |
| ENSG00000152465 | 0.33888889 |            | 0.33888889 |             | 0.055555556 | 0.1190476 |           |
| ENSG00000141384 |            | 0.44545455 |            | 0.445454545 |             |           | 0.1686047 |
| ENSG00000205246 | 0.09090909 |            | 0.09090909 |             |             |           |           |
| ENSG00000149577 | 0.26666667 | 0.19817073 | 0.26666667 | 0.198170732 | 0.05952381  | 0.1363636 | 0.377907  |
| ENSG00000167654 |            | 0.31111111 |            | 0.311111111 |             |           | 0.372093  |
| ENSG00000111371 | 0.24846626 |            | 0.24846626 |             | 0.457317073 | 0.4302326 |           |
| ENSG00000063241 | 0.26646707 |            | 0.26646707 |             | 0.44047619  | 0.377907  |           |
| ENSG00000157470 | 0.23353293 |            | 0.23353293 |             | 0.494047619 | 0.2965116 |           |
| ENSG00000167112 |            | 0.17777778 |            | 0.177777778 |             |           |           |
| ENSG00000137634 |            | 0.12576687 |            | 0.125766871 |             |           |           |
| ENSG00000117054 |            | 0.3030303  |            | 0.303030303 |             |           |           |
| ENSG00000156313 |            |            |            |             |             |           | 0.0666667 |
| ENSG00000143157 |            | 0.47575758 |            | 0.475757576 |             |           | 0.494186  |
| ENSG00000138083 |            | 0.11515152 |            | 0.115151515 |             |           |           |
| ENSG00000179008 | 0.49382716 | 0.29320988 | 0.49382716 | 0.293209877 | 0.166666667 | 0.1363636 | 0.4767442 |
| ENSG00000205531 | 0.19760479 |            | 0.19760479 |             |             |           |           |
| ENSG00000151725 |            | 0.12727273 |            | 0.127272727 |             |           | 0.3953488 |
| ENSG00000216490 | 0.30239521 | 0.23939394 | 0.30239521 | 0.239393939 | 0.101190476 | 0.1395349 | 0.1511628 |
| ENSG00000131737 |            | 0.12424242 |            | 0.124242424 |             |           | 0.0639535 |
| ENSG00000108684 |            | 0.36666667 |            | 0.366666667 |             |           | 0.4882353 |
| ENSG00000222019 |            | 0.27586207 |            | 0.275862069 |             |           | 0.3197674 |
| ENSG00000096654 |            | 0.4556962  |            | 0.455696203 |             |           | 0.3977273 |
| ENSG00000163166 |            | 0.31818182 |            | 0.318181818 |             |           | 0.3255814 |
| ENSG00000169689 | 0.4251497  |            | 0.4251497  |             | 0.25        | 0.3023256 |           |
| ENSG00000134996 |            | 0.3597561  |            | 0.359756098 |             |           | 0.3941176 |
| ENSG00000111241 |            | 0.30232558 |            | 0.302325581 |             |           | 0.2325581 |
| ENSG00000159214 | 0.09281437 |            | 0.09281437 |             | 0.386904762 | 0.4360465 |           |
| ENSG00000135968 | 0.40588235 | 0.35849057 | 0.40588235 | 0.358490566 | 0.053571429 | 0.2034884 | 0.1931818 |
| ENSG00000114904 |            | 0.47647059 |            | 0.476470588 |             |           | 0.5       |
| ENSG00000020633 |            | 0.06060606 |            | 0.060606061 |             |           |           |
| ENSG00000187049 | 0.31437126 | 0.17272727 | 0.31437126 | 0.172727273 |             |           |           |
| ENSG00000038295 | 0.4011976  | 0.45426829 | 0.4011976  | 0.454268293 | 0.482142857 | 0.4767442 | 0.4940476 |
| ENSG00000172867 |            |            |            |             |             |           | 0.127907  |
| ENSG00000168944 |            | 0.41515152 |            | 0.415151515 |             |           | 0.4883721 |
| ENSG00000186827 |            |            |            |             |             |           | 0.1818182 |
| ENSG00000165912 | 0.3961039  |            | 0.3961039  |             | 0.147727273 | 0.0813953 |           |
| ENSG00000127952 | 0.15730337 | 0.30909091 | 0.15730337 | 0.309090909 | 0.477777778 | 0.3255814 | 0.4886364 |
| ENSG00000214401 |            | 0.16292135 |            | 0.162921348 |             |           |           |
| ENSG00000203872 | 0.16167665 | 0.08588957 | 0.16167665 | 0.085889571 |             |           | 0.126506  |
| ENSG00000165914 | 0.46385542 | 0.26666667 | 0.46385542 | 0.266666667 | 0.380952381 | 0.3154762 | 0.4709302 |
| ENSG00000139842 | 0.10479042 |            | 0.10479042 |             |             |           | 0.2383721 |
| ENSG00000106991 | 0.22155689 |            | 0.22155689 |             | 0.053571429 | 0.0813953 |           |
| ENSG00000196531 | 0.47005988 |            | 0.47005988 |             | 0.214285714 | 0.3604651 |           |
| ENSG00000181192 |            | 0.08333333 |            | 0.083333333 |             |           | 0.0568182 |
| ENSG00000225190 |            | 0.16666667 |            | 0.166666667 |             |           |           |
| ENSG00000167791 |            | 0.47272727 |            | 0.472727273 |             |           | 0.2848837 |
| ENSG00000163295 | 0.1        | 0.11515152 | 0.1        | 0.115151515 | 0.077777778 | 0.1022727 | 0.2674419 |
| ENSG00000173253 | 0.14044944 | 0.3969697  | 0.14044944 | 0.396969697 |             | 0.0568182 | 0.4886364 |
| ENSG00000156006 | 0.28333333 |            | 0.28333333 |             |             |           |           |
| ENSG00000014123 | 0.07185629 |            | 0.07185629 |             |             | 0.122093  |           |
| ENSG00000256892 | 0.39444444 | 0.32222222 | 0.39444444 | 0.322222222 | 0.466666667 | 0.4189189 | 0.4111111 |
| ENSG00000184113 |            | 0.11111111 |            | 0.111111111 | 0.283950617 | 0.2616279 | 0.2840909 |



|                |            |            |            |             |             |           |           |
|----------------|------------|------------|------------|-------------|-------------|-----------|-----------|
| ENSG0000092020 | 0.46706587 | 0.06111111 | 0.46706587 | 0.06111111  | 0.422619048 |           | 0.4127907 |
| ENSG0000101017 | 0.35928144 | 0.05172414 | 0.35928144 | 0.051724138 | 0.307228916 |           | 0.5       |
| ENSG0000111344 |            | 0.07386364 |            | 0.073863636 |             |           | 0.25      |
| ENSG0000183775 |            | 0.41975309 |            | 0.419753086 |             |           | 0.2926829 |
| ENSG0000100865 |            | 0.31707317 |            | 0.317073171 |             |           | 0.4411765 |
| ENSG0000166272 |            | 0.43820225 |            | 0.438202247 |             |           | 0.494186  |
| ENSG0000132436 | 0.20359281 | 0.2654321  | 0.20359281 | 0.265432099 | 0.386904762 | 0.4011628 | 0.4705882 |
| ENSG0000106009 |            | 0.14606742 |            | 0.146067416 |             |           |           |
| ENSG0000258366 |            | 0.24242424 |            | 0.242424242 | 0.095238095 | 0.0882353 | 0.4204545 |
| ENSG0000259645 |            | 0.07894737 |            | 0.078947368 |             |           | 0.4125    |
| ENSG0000177150 |            | 0.37195122 |            | 0.37195122  |             |           | 0.127907  |
| ENSG0000152217 | 0.0748503  | 0.12777778 | 0.0748503  | 0.127777778 |             |           | 0.1590909 |
| ENSG0000189171 | 0.47005988 |            | 0.47005988 |             | 0.351190476 | 0.3081395 |           |
| ENSG0000204525 | 0.22159091 | 0.33018868 | 0.22159091 | 0.330188679 | 0.307692308 | 0.2125    | 0.2941176 |
| ENSG0000155034 |            | 0.43939394 |            | 0.439393939 |             |           | 0.2647059 |
| ENSG0000078900 |            | 0.21341463 |            | 0.213414634 |             |           | 0.4651163 |
| ENSG0000132840 | 0.20481928 |            | 0.20481928 |             | 0.398809524 | 0.494186  |           |
| ENSG0000120693 |            | 0.08333333 |            | 0.083333333 |             |           | 0.244186  |
| ENSG0000130255 |            |            |            | 0.055555556 |             |           |           |
| ENSG0000187145 | 0.3742515  | 0.31666667 | 0.3742515  | 0.316666667 |             |           | 0.244186  |
| ENSG0000196381 | 0.28742515 | 0.15151515 | 0.28742515 | 0.151515152 | 0.119047619 | 0.1511628 | 0.3352941 |
| ENSG0000158715 |            | 0.08333333 |            | 0.083333333 |             |           | 0.1802326 |
| ENSG0000112578 |            | 0.06666667 |            | 0.066666667 |             |           | 0.2034884 |
| ENSG0000174567 |            | 0.06666667 |            | 0.066666667 |             |           |           |
| ENSG0000141510 | 0.33146067 |            | 0.33146067 |             | 0.488888889 | 0.4090909 | 0.1162791 |
| ENSG0000100345 | 0.0748503  | 0.12727273 | 0.0748503  | 0.127272727 | 0.155555556 | 0.0777778 | 0.3536585 |
| ENSG0000159713 |            | 0.07575758 |            | 0.075757576 |             |           |           |
| ENSG0000119185 | 0.25       | 0.48484848 | 0.25       | 0.484848485 |             |           | 0.1395349 |
| ENSG0000092531 |            | 0.25       |            | 0.25        |             |           |           |
| ENSG0000156735 | 0.11111111 | 0.25555556 | 0.11111111 | 0.255555556 |             |           | 0.3409091 |
| ENSG0000107960 | 0.18333333 |            | 0.18333333 |             | 0.122222222 | 0.2045455 |           |
| ENSG0000180440 |            | 0.45454545 |            | 0.454545455 |             |           | 0.494186  |
| ENSG0000183643 | 0.46107784 | 0.20909091 | 0.46107784 | 0.209090909 | 0.458333333 | 0.4767442 | 0.1931818 |
| ENSG0000170866 |            |            |            |             | 0.077380952 | 0.122093  |           |
| ENSG0000137090 |            | 0.16158537 |            | 0.161585366 |             |           | 0.2470588 |
| ENSG0000162929 | 0.41477273 | 0.44242424 | 0.41477273 | 0.442424242 | 0.275       | 0.3372093 | 0.3895349 |
| ENSG0000172061 |            | 0.3030303  |            | 0.303030303 |             |           | 0.1477273 |
| ENSG0000063015 |            | 0.15454545 |            | 0.154545455 |             |           | 0.1046512 |
| ENSG0000157693 |            | 0.15151515 |            | 0.151515152 |             |           | 0.2559524 |
| ENSG0000198890 |            | 0.20909091 |            | 0.209090909 |             |           | 0.1337209 |
| ENSG0000170962 |            | 0.46666667 |            | 0.466666667 |             |           | 0.4825581 |
| ENSG0000096070 | 0.2994012  | 0.38764045 | 0.2994012  | 0.387640449 | 0.30952381  | 0.3488372 | 0.375     |
| ENSG0000167220 |            | 0.16666667 |            | 0.166666667 |             |           | 0.1941176 |
| ENSG0000069431 |            | 0.36666667 |            | 0.366666667 |             |           | 0.2325581 |
| ENSG0000185823 |            | 0.30898876 |            | 0.308988764 |             |           | 0.2790698 |
| ENSG0000184216 |            | 0.20555556 |            | 0.205555556 |             |           | 0.2045455 |
| ENSG0000121022 | 0.09580838 |            | 0.09580838 |             |             |           |           |
| ENSG0000120875 | 0.39520958 | 0.07272727 | 0.39520958 | 0.072727273 | 0.428571429 | 0.4107143 |           |
| ENSG0000156042 | 0.14444444 |            | 0.14444444 |             |             |           |           |
| ENSG0000167110 |            | 0.19393939 |            | 0.193939394 |             |           | 0.2906977 |
| ENSG0000154310 |            | 0.26060606 |            | 0.260606061 |             |           | 0.3139535 |
| ENSG0000119321 | 0.12048193 | 0.28333333 | 0.12048193 | 0.283333333 | 0.375       | 0.3430233 | 0.4360465 |
| ENSG0000256223 | 0.10778443 | 0.27439024 | 0.10778443 | 0.274390244 | 0.077380952 | 0.0872093 | 0.0647059 |
| ENSG0000135870 |            | 0.11235955 |            | 0.112359551 |             |           | 0.2613636 |

|                 |            |            |            |             |             |           |           |
|-----------------|------------|------------|------------|-------------|-------------|-----------|-----------|
| ENSG00000152591 |            | 0.12121212 |            | 0.121212121 |             |           | 0.1337209 |
| ENSG00000165646 |            | 0.49390244 |            | 0.493902439 |             |           | 0.4642857 |
| ENSG00000145863 | 0.3502994  | 0.35151515 | 0.3502994  | 0.351515152 | 0.375       | 0.3333333 | 0.3313953 |
| ENSG00000167721 |            | 0.26111111 |            | 0.261111111 |             |           | 0.1555556 |
| ENSG00000164398 | 0.15972222 | 0.23030303 | 0.15972222 | 0.23030303  | 0.5         | 0.4090909 | 0.4235294 |
| ENSG00000134183 | 0.06586826 |            | 0.06586826 |             | 0.101190476 |           | 0.1046512 |
| ENSG00000164707 | 0.48484848 |            | 0.48484848 |             | 0.43373494  |           | 0.4352941 |
| ENSG00000081760 | 0.49700599 | 0.22121212 | 0.49700599 | 0.221212121 | 0.470238095 | 0.375     | 0.3294118 |
| ENSG00000186807 |            |            |            |             |             |           | 0.3863636 |
| ENSG00000144847 | 0.48802395 |            | 0.48802395 |             | 0.470238095 |           | 0.3953488 |
| ENSG00000143942 |            | 0.16969697 |            | 0.16969697  |             |           | 0.0813953 |
| ENSG00000172340 |            | 0.46363636 |            | 0.463636364 |             |           | 0.3953488 |
| ENSG00000214128 |            | 0.46060606 |            | 0.460606061 |             |           | 0.25      |
| ENSG00000128059 |            | 0.43939394 |            | 0.439393939 | 0.1         | 0.2333333 | 0.2325581 |
| ENSG00000206072 | 0.4760479  | 0.28181818 | 0.4760479  | 0.281818182 | 0.488888889 | 0.4318182 | 0.1744186 |
| ENSG00000204498 |            | 0.12424242 |            | 0.124242424 |             |           | 0.2906977 |
| ENSG00000184774 |            |            |            |             |             |           | 0.1818182 |
| ENSG00000168487 |            | 0.24848485 |            | 0.248484848 |             |           | 0.2093023 |
| ENSG00000136936 | 0.22754491 |            | 0.22754491 |             | 0.476190476 | 0.4880952 | 0.0872093 |
| ENSG00000101310 | 0.36931818 |            | 0.36931818 |             | 0.266666667 | 0.4090909 |           |
| ENSG00000103978 |            | 0.09302326 |            | 0.093023256 | 0.345238095 | 0.2790698 | 0.1022727 |
| ENSG00000214655 |            | 0.41515152 |            | 0.415151515 |             |           | 0.2848837 |
| ENSG00000188636 |            | 0.49079755 |            | 0.490797546 |             |           | 0.4204545 |
| ENSG00000175556 |            | 0.33636364 |            | 0.336363636 |             |           | 0.2176471 |
| ENSG00000248167 |            | 0.12727273 |            | 0.127272727 |             |           | 0.372093  |
| ENSG00000185518 | 0.08383234 | 0.44444444 | 0.08383234 | 0.444444444 | 0.172619048 | 0.0988372 | 0.4545455 |
| ENSG00000171295 | 0.47126437 | 0.32515337 | 0.47126437 | 0.325153374 | 0.166666667 | 0.0853659 | 0.3139535 |
| ENSG00000040199 |            | 0.34545455 |            | 0.345454545 |             |           | 0.3181818 |
| ENSG00000219159 | 0.34730539 |            | 0.34730539 |             | 0.392857143 |           | 0.4294118 |
| ENSG00000170683 | 0.26946108 |            | 0.26946108 |             | 0.357142857 |           | 0.255814  |
| ENSG00000120802 |            | 0.33333333 |            | 0.333333333 |             |           |           |
| ENSG00000185262 |            | 0.37575758 |            | 0.375757576 |             |           | 0.3529412 |
| ENSG00000066629 | 0.23333333 | 0.32317073 | 0.23333333 | 0.323170732 |             |           | 0.4476744 |
| ENSG00000110871 | 0.0748503  | 0.30606061 | 0.0748503  | 0.306060606 | 0.488095238 | 0.4476744 | 0.4476744 |
| ENSG00000133059 |            | 0.45426829 |            | 0.454268293 |             |           | 0.4883721 |
| ENSG00000105640 |            | 0.31707317 |            | 0.317073171 |             |           | 0.4883721 |
| ENSG00000061938 |            |            |            |             |             |           | 0.1117647 |
| ENSG00000115073 |            | 0.29192547 |            | 0.291925466 |             |           | 0.3588235 |
| ENSG00000187037 | 0.32634731 |            | 0.32634731 |             | 0.232142857 | 0.1976744 |           |
| ENSG00000147570 |            |            |            |             | 0.058139535 | 0.0731707 |           |
| ENSG00000259220 |            | 0.10606061 |            | 0.106060606 |             |           | 0.0581395 |
| ENSG00000167978 |            | 0.2        |            | 0.2         |             |           | 0.4011628 |
| ENSG00000154040 | 0.10588235 | 0.4        | 0.10588235 | 0.4         | 0.077380952 | 0.1976744 | 0.5       |
| ENSG00000179627 |            | 0.11235955 |            | 0.112359551 |             |           |           |
| ENSG00000106123 | 0.0748503  |            | 0.0748503  |             |             |           |           |
| ENSG00000204856 | 0.17878788 |            | 0.17878788 |             | 0.054216867 | 0.0705882 |           |
| ENSG00000168356 |            | 0.49393939 |            | 0.493939394 |             |           | 0.4360465 |
| ENSG00000109991 |            | 0.41666667 |            | 0.416666667 |             |           | 0.4186047 |
| ENSG00000100354 | 0.17065868 | 0.48780488 | 0.17065868 | 0.487804878 |             |           | 0.4823529 |
| ENSG00000106809 |            | 0.39534884 |            | 0.395348837 |             |           | 0.3409091 |
| ENSG00000168118 |            | 0.48170732 |            | 0.481707317 |             |           | 0.4647059 |
| ENSG00000167291 |            | 0.41515152 |            | 0.415151515 |             |           | 0.3488372 |
| ENSG00000198001 |            | 0.46052632 |            | 0.460526316 |             |           | 0.3717949 |
| ENSG00000187097 |            | 0.44545455 |            | 0.445454545 | 0.303571429 | 0.3081395 | 0.3546512 |

|                 |            |            |            |             |             |           |           |
|-----------------|------------|------------|------------|-------------|-------------|-----------|-----------|
| ENSG00000171201 | 0.12790698 | 0.38333333 | 0.12790698 | 0.38333333  |             |           | 0.3863636 |
| ENSG00000071189 |            | 0.49090909 |            | 0.49090909  |             |           | 0.4767442 |
| ENSG00000134574 | 0.42134831 |            | 0.42134831 |             |             |           |           |
| ENSG00000175567 | 0.2245509  |            | 0.2245509  |             |             |           |           |
| ENSG00000168152 |            | 0.44242424 |            | 0.44242424  |             |           | 0.255814  |
| ENSG00000162664 |            | 0.49393939 |            | 0.49393939  |             |           | 0.0813953 |
| ENSG00000162896 |            |            |            |             |             |           | 0.3068182 |
| ENSG00000126778 | 0.36227545 | 0.06666667 | 0.36227545 | 0.06666667  | 0.16666667  | 0.2151163 | 0.1686047 |
| ENSG00000182986 |            | 0.29090909 |            | 0.29090909  |             | 0.2621951 | 0.3604651 |
| ENSG00000213057 | 0.0988024  | 0.42727273 | 0.0988024  | 0.42727272  | 0.398809524 | 0.3895349 | 0.4534884 |
| ENSG00000180264 | 0.18263473 |            | 0.18263473 |             | 0.144578313 | 0.1607143 |           |
| ENSG00000108950 | 0.13173653 | 0.2030303  | 0.13173653 | 0.203030303 | 0.355555556 | 0.3777778 | 0.2738095 |
| ENSG00000169126 | 0.16467066 | 0.47727273 | 0.16467066 | 0.477272727 |             |           | 0.4333333 |
| ENSG00000197380 |            | 0.16969697 |            | 0.16969697  |             |           | 0.2034884 |
| ENSG00000168159 |            | 0.46060606 |            | 0.460606061 |             |           | 0.4476744 |
| ENSG00000134982 |            | 0.37195122 |            | 0.37195122  |             |           | 0.2732558 |
| ENSG00000221886 | 0.44277108 |            | 0.44277108 |             | 0.380952381 | 0.3895349 |           |
| ENSG00000178110 | 0.246875   |            | 0.246875   |             | 0.214285714 | 0.244186  |           |
| ENSG00000125850 |            | 0.41158537 |            | 0.411585366 |             |           | 0.2790698 |
| ENSG00000122705 | 0.20658683 | 0.1        | 0.20658683 | 0.1         | 0.154761905 | 0.127907  | 0.1882353 |
| ENSG00000253161 |            | 0.38636364 |            | 0.386363636 |             |           | 0.1111111 |
| ENSG00000112655 |            | 0.41158537 |            | 0.411585366 |             |           | 0.3470588 |
| ENSG00000188162 | 0.16111111 | 0.26363636 | 0.16111111 | 0.263636364 | 0.174418605 | 0.1818182 | 0.1162791 |
| ENSG00000213085 |            |            |            |             | 0.25        | 0.2325581 |           |
| ENSG00000100592 |            |            |            |             | 0.166666667 | 0.1511628 |           |
| ENSG00000184402 |            |            |            |             |             |           | 0.1117647 |
| ENSG00000128656 | 0.31736527 |            | 0.31736527 |             | 0.291666667 | 0.2906977 |           |
| ENSG00000156411 |            | 0.25151515 |            | 0.251515152 |             |           | 0.3662791 |
| ENSG00000065325 |            | 0.42424242 |            | 0.424242424 |             |           | 0.3255814 |
| ENSG00000146904 |            | 0.05757576 |            | 0.057575758 |             |           |           |
| ENSG00000088367 |            | 0.17272727 |            | 0.172727273 |             |           | 0.1964286 |
| ENSG00000142330 |            | 0.42222222 |            | 0.422222222 |             |           | 0.375     |
| ENSG00000166813 |            | 0.31402439 |            | 0.31402439  |             |           | 0.3647059 |
| ENSG00000135297 | 0.19444444 | 0.16770186 | 0.19444444 | 0.167701863 |             | 0.1136364 | 0.2117647 |
| ENSG00000113494 | 0.40449438 | 0.17777778 | 0.40449438 | 0.17777778  | 0.193181818 | 0.25      | 0.3181818 |
| ENSG00000085721 |            | 0.11212121 |            | 0.112121212 |             |           | 0.1627907 |
| ENSG00000144724 |            | 0.34242424 |            | 0.342424242 |             |           | 0.2616279 |
| ENSG00000165502 | 0.42222222 | 0.43030303 | 0.42222222 | 0.43030303  | 0.215909091 | 0.125     | 0.0813953 |
| ENSG00000076604 |            | 0.1993865  |            | 0.199386503 |             |           | 0.3139535 |
| ENSG00000137601 | 0.08083832 | 0.36060606 | 0.08083832 | 0.360606061 | 0.18452381  | 0.1569767 | 0.1647059 |
| ENSG00000198937 |            | 0.30606061 |            | 0.306060606 |             |           | 0.5       |
| ENSG00000181449 |            | 0.21666667 |            | 0.216666667 |             |           |           |
| ENSG00000184208 |            | 0.2030303  |            | 0.203030303 |             |           |           |
| ENSG00000102967 |            | 0.49444444 |            | 0.494444444 |             |           | 0.3636364 |
| ENSG00000204511 | 0.10227273 | 0.25       | 0.10227273 | 0.25        | 0.125       | 0.1363636 | 0.1111111 |
| ENSG00000256235 | 0.28742515 |            | 0.28742515 |             | 0.295180723 | 0.2159091 |           |
| ENSG00000188385 |            | 0.48484848 |            | 0.484848485 |             |           | 0.0755814 |
| ENSG00000172270 |            | 0.37647059 |            | 0.376470588 |             |           | 0.1704545 |
| ENSG00000179119 |            | 0.4695122  |            | 0.469512195 |             |           | 0.2202381 |
| ENSG00000212128 |            | 0.43081761 |            | 0.43081761  |             |           | 0.2045455 |
| ENSG00000110717 | 0.23888889 | 0.16363636 | 0.23888889 | 0.163636364 | 0.238095238 | 0.2333333 | 0.2093023 |
| ENSG00000101150 |            | 0.5        |            | 0.5         |             |           | 0.1046512 |
| ENSG00000134548 |            | 0.34146341 |            | 0.341463415 |             |           | 0.2142857 |
| ENSG00000109956 | 0.39240506 | 0.2804878  | 0.39240506 | 0.280487805 | 0.119047619 | 0.1104651 |           |

|                 |            |            |            |             |             |           |           |
|-----------------|------------|------------|------------|-------------|-------------|-----------|-----------|
| ENSG00000140287 |            |            |            |             |             |           | 0.0568182 |
| ENSG00000182578 | 0.28614458 | 0.1954023  | 0.28614458 | 0.195402299 | 0.220238095 | 0.1918605 | 0.3977273 |
| ENSG00000128872 |            | 0.49085366 |            | 0.490853659 |             |           | 0.5       |
| ENSG00000071051 |            | 0.31212121 |            | 0.312121212 |             |           | 0.3139535 |
| ENSG00000198520 | 0.18562874 |            | 0.18562874 |             |             |           |           |
| ENSG00000101955 |            | 0.11235955 |            | 0.112359551 |             |           | 0.0714286 |
| ENSG00000158125 |            | 0.46060606 |            | 0.460606061 |             |           | 0.3953488 |
| ENSG00000136861 |            | 0.25555556 |            | 0.255555556 |             |           | 0.3430233 |
| ENSG00000176953 |            | 0.29393939 |            | 0.293939394 |             |           | 0.0697674 |
| ENSG00000183726 |            | 0.46060606 |            | 0.460606061 |             |           | 0.3139535 |
| ENSG00000160185 |            | 0.42073171 |            | 0.420731707 |             |           | 0.3255814 |
| ENSG00000170776 | 0.45808383 | 0.5        | 0.45808383 | 0.5         | 0.5         | 0.4767442 | 0.4767442 |
| ENSG00000004897 |            | 0.40243902 |            | 0.402439024 | 0.077777778 | 0.0697674 | 0.2176471 |
| ENSG00000117152 | 0.44311377 | 0.2791411  | 0.44311377 | 0.279141104 | 0.416666667 | 0.4767442 | 0.3705882 |
| ENSG00000183186 |            | 0.2652439  |            | 0.265243902 |             |           | 0.4767442 |
| ENSG00000165609 |            | 0.47575758 |            | 0.475757576 |             |           | 0.4772727 |
| ENSG00000125895 | 0.17065868 |            | 0.17065868 |             |             |           |           |
| ENSG00000169330 |            | 0.43030303 |            | 0.43030303  |             |           | 0.3662791 |
| ENSG00000147592 |            | 0.08888889 |            | 0.088888889 |             |           |           |
| ENSG00000168634 |            | 0.41818182 |            | 0.418181818 |             |           | 0.2674419 |
| ENSG00000113532 | 0.4011976  | 0.39939024 | 0.4011976  | 0.399390244 | 0.259036145 | 0.3546512 | 0.3705882 |
| ENSG00000167065 | 0.41111111 | 0.43030303 | 0.41111111 | 0.43030303  | 0.416666667 | 0.4825581 | 0.4883721 |
| ENSG00000214517 |            | 0.15454545 |            | 0.154545455 | 0.464285714 | 0.4588235 | 0.2674419 |
| ENSG00000125888 | 0.16467066 |            | 0.16467066 |             |             |           |           |
| ENSG00000074370 | 0.35928144 | 0.46060606 | 0.35928144 | 0.460606061 | 0.089285714 | 0.0813953 | 0.4146341 |
| ENSG00000151789 | 0.19461078 | 0.49074074 | 0.19461078 | 0.490740741 |             | 0.1104651 | 0.5       |
| ENSG00000250588 |            |            |            |             | 0.244444444 | 0.2444444 |           |
| ENSG00000158683 |            | 0.11235955 |            | 0.112359551 |             |           |           |
| ENSG00000131558 | 0.40361446 | 0.42727273 | 0.40361446 | 0.427272727 | 0.244047619 | 0.2093023 | 0.2790698 |
| ENSG00000205937 | 0.34431138 | 0.21818182 | 0.34431138 | 0.218181818 | 0.416666667 | 0.4302326 |           |
| ENSG00000117868 | 0.0505618  | 0.11818182 | 0.0505618  | 0.118181818 |             | 0.0666667 | 0.4879518 |
| ENSG00000167552 | 0.16666667 |            | 0.16666667 |             | 0.295180723 | 0.3255814 |           |
| ENSG00000105409 |            | 0.35465116 |            | 0.354651163 |             |           | 0.2386364 |
| ENSG00000184992 |            | 0.3969697  |            | 0.396969697 |             |           | 0.3255814 |
| ENSG00000146242 | 0.4251497  | 0.32424242 | 0.4251497  | 0.324242424 | 0.4625      | 0.4529412 | 0.3604651 |
| ENSG00000021762 | 0.42168675 | 0.24695122 | 0.42168675 | 0.24695122  | 0.166666667 | 0.2616279 | 0.1022727 |
| ENSG00000073536 | 0.15568862 |            | 0.15568862 |             | 0.05952381  | 0.0639535 | 0.1395349 |
| ENSG00000185594 | 0.35628743 |            | 0.35628743 |             | 0.5         | 0.4709302 |           |
| ENSG00000181804 | 0.11077844 | 0.35757576 | 0.11077844 | 0.357575758 |             |           | 0.2857143 |
| ENSG00000183470 | 0.36746988 | 0.48787879 | 0.36746988 | 0.487878788 | 0.202380952 | 0.2209302 | 0.4883721 |
| ENSG00000165246 |            |            |            |             |             |           | 0.4347826 |
| ENSG00000196199 | 0.24550898 |            | 0.24550898 |             |             |           |           |
| ENSG00000182836 |            | 0.26666667 |            | 0.266666667 |             |           | 0.4090909 |
| ENSG00000179988 | 0.38922156 | 0.36585366 | 0.38922156 | 0.365853659 | 0.355421687 | 0.4476744 | 0.4411765 |
| ENSG00000117010 |            | 0.38125    |            | 0.38125     |             |           | 0.3588235 |
| ENSG00000176222 |            | 0.428125   |            | 0.428125    |             |           | 0.1705882 |
| ENSG00000180458 |            | 0.15151515 |            | 0.151515152 |             |           | 0.3313953 |
| ENSG00000167741 |            | 0.20606061 |            | 0.206060606 | 0.05952381  | 0.075     | 0.1453488 |
| ENSG00000164038 |            |            |            |             |             |           | 0.1022727 |
| ENSG00000160959 |            | 0.49090909 |            | 0.490909091 |             |           | 0.3895349 |
| ENSG00000125871 |            | 0.3452381  |            | 0.345238095 |             |           | 0.5       |
| ENSG00000258311 |            | 0.20786517 |            | 0.207865169 |             |           | 0.1860465 |
| ENSG00000171462 | 0.13772455 | 0.30487805 | 0.13772455 | 0.304878049 | 0.053571429 | 0.1046512 | 0.1117647 |
| ENSG00000070950 | 0.30838323 | 0.30909091 | 0.30838323 | 0.309090909 | 0.446428571 | 0.4534884 | 0.4418605 |

|                 |            |            |            |             |             |           |           |
|-----------------|------------|------------|------------|-------------|-------------|-----------|-----------|
| ENSG00000104164 |            | 0.19090909 |            | 0.190909091 |             |           | 0.1162791 |
| ENSG00000149506 |            | 0.26666667 |            | 0.266666667 | 0.375       | 0.4011628 | 0.4011628 |
| ENSG00000143320 |            |            |            |             |             |           | 0.1860465 |
| ENSG00000127688 |            | 0.45757576 |            | 0.457575758 |             |           | 0.3313953 |
| ENSG00000143951 |            | 0.41304348 |            | 0.413043478 | 0.166666667 | 0.2045455 | 0.2965116 |
| ENSG00000144043 |            | 0.36206897 |            | 0.362068966 |             |           | 0.4772727 |
| ENSG00000052126 | 0.24444444 | 0.20909091 | 0.24444444 | 0.209090909 | 0.077777778 | 0.0666667 | 0.3589744 |
| ENSG00000112983 | 0.3372093  | 0.36890244 | 0.3372093  | 0.368902439 | 0.397727273 | 0.4204545 | 0.4360465 |
| ENSG00000235865 | 0.3974359  |            | 0.3974359  |             | 0.380952381 | 0.377907  |           |
| ENSG00000101493 | 0.05389222 | 0.21212121 | 0.05389222 | 0.212121212 | 0.172619048 | 0.1627907 | 0.1686047 |
| ENSG00000253258 |            |            |            |             | 0.178571429 | 0.2325581 |           |
| ENSG00000184785 |            | 0.40909091 |            | 0.409090909 |             |           | 0.4651163 |
| ENSG00000198538 |            | 0.31111111 |            | 0.311111111 |             |           | 0.2666667 |
| ENSG00000131236 | 0.44277108 | 0.10869565 | 0.44277108 | 0.108695652 | 0.414634146 | 0.5       | 0.3414634 |
| ENSG00000139579 | 0.2005988  |            | 0.2005988  |             |             |           |           |
| ENSG00000126787 | 0.2994012  |            | 0.2994012  |             |             |           |           |
| ENSG00000146859 |            |            |            |             |             |           | 0.0681818 |
| ENSG00000187391 | 0.06666667 | 0.29878049 | 0.06666667 | 0.298780488 |             |           | 0.4886364 |
| ENSG00000113161 |            | 0.39393939 |            | 0.393939394 |             |           | 0.4647059 |
| ENSG00000196355 | 0.26946108 |            | 0.26946108 |             | 0.18452381  | 0.1511628 |           |
| ENSG00000166377 | 0.34444444 | 0.47222222 | 0.34444444 | 0.472222222 | 0.422222222 | 0.375     | 0.375     |
| ENSG00000241935 |            | 0.36060606 |            | 0.360606061 |             |           | 0.255814  |
| ENSG00000113205 |            | 0.28888889 |            | 0.288888889 |             |           | 0.4302326 |
| ENSG00000162604 | 0.18562874 |            | 0.18562874 |             |             |           |           |
| ENSG00000129159 |            | 0.2030303  |            | 0.203030303 |             |           | 0.1744186 |
| ENSG00000187325 |            | 0.22611465 |            | 0.22611465  |             |           | 0.4666667 |
| ENSG00000184203 |            | 0.33908046 |            | 0.33908046  |             |           | 0.4605263 |
| ENSG00000179046 |            | 0.36842105 |            | 0.368421053 |             |           | 0.4883721 |
| ENSG00000117479 | 0.36805556 | 0.22121212 | 0.36805556 | 0.221212121 | 0.109756098 | 0.1323529 | 0.1162791 |
| ENSG00000168890 |            | 0.41515152 |            | 0.415151515 |             |           | 0.4360465 |
| ENSG00000204930 |            | 0.44545455 |            | 0.445454545 |             |           | 0.3372093 |
| ENSG00000082516 |            | 0.43292683 |            | 0.432926829 |             |           |           |
| ENSG00000101188 |            | 0.12420382 |            | 0.124203822 |             |           | 0.1022727 |
| ENSG00000122068 | 0.40419162 | 0.13030303 | 0.40419162 | 0.13030303  | 0.088888889 | 0.0681818 | 0.0639535 |
| ENSG00000125650 | 0.14465409 |            | 0.14465409 |             |             |           |           |
| ENSG00000153086 | 0.0508982  |            | 0.0508982  |             |             |           |           |
| ENSG00000172500 |            | 0.22121212 |            | 0.221212121 |             |           | 0.3255814 |
| ENSG00000159322 |            | 0.31707317 |            | 0.317073171 |             |           | 0.2034884 |
| ENSG00000158669 | 0.47305389 | 0.48484848 | 0.47305389 | 0.484848485 | 0.439759036 | 0.4883721 | 0.4941176 |
| ENSG00000168899 |            |            |            |             |             |           | 0.3647059 |
| ENSG00000128510 |            | 0.41515152 |            | 0.415151515 |             |           | 0.494186  |
| ENSG00000182187 | 0.07575758 |            | 0.07575758 |             | 0.125       | 0.127907  |           |
| ENSG00000176887 |            | 0.34848485 |            | 0.348484848 |             |           | 0.494186  |
| ENSG00000175048 |            | 0.37804878 |            | 0.37804878  |             |           | 0.4883721 |
| ENSG00000257230 | 0.42215569 |            | 0.42215569 |             |             |           |           |
| ENSG00000145384 |            | 0.43939394 |            | 0.439393939 | 0.06547619  | 0.0639535 | 0.4534884 |
| ENSG00000111704 | 0.08333333 |            | 0.08333333 |             |             | 0.1022727 |           |
| ENSG00000091129 | 0.11377246 | 0.11212121 | 0.11377246 | 0.112121212 | 0.182926829 | 0.255814  | 0.25      |
| ENSG00000132005 |            | 0.26969697 |            | 0.26969697  |             |           | 0.244186  |
| ENSG00000147432 | 0.15269461 | 0.06363636 | 0.15269461 | 0.063636364 | 0.25        | 0.1337209 |           |
| ENSG00000256530 |            | 0.29545455 |            | 0.295454545 |             |           | 0.1463415 |
| ENSG00000198680 |            | 0.49375    |            | 0.49375     |             |           | 0.3674699 |
| ENSG00000128254 | 0.46111111 |            | 0.46111111 |             | 0.233333333 | 0.1818182 |           |
| ENSG00000203791 |            | 0.46341463 |            | 0.463414634 |             |           | 0.4470588 |

|                 |            |            |            |             |             |            |           |
|-----------------|------------|------------|------------|-------------|-------------|------------|-----------|
| ENSG00000185013 |            | 0.17777778 |            | 0.17777778  |             |            | 0.1136364 |
| ENSG00000196793 | 0.11676647 | 0.43678161 | 0.11676647 | 0.436781609 | 0.410714286 | 0.4360465  | 0.4360465 |
| ENSG00000151388 |            | 0.43939394 |            | 0.439393939 |             |            | 0.2732558 |
| ENSG00000145982 | 0.36227545 |            | 0.36227545 |             | 0.285714286 | 0.2613636  |           |
| ENSG00000127418 | 0.15269461 | 0.45454545 | 0.15269461 | 0.454545455 |             | 0.0581395  | 0.2848837 |
| ENSG0000004838  |            |            |            |             | 0.375       | 0.4886364  | 0.4825581 |
| ENSG00000164796 | 0.44382022 | 0.09195402 | 0.44382022 | 0.091954023 | 0.181818182 | 0.11111111 | 0.2613636 |
| ENSG00000146674 |            | 0.2        |            | 0.2         |             |            |           |
| ENSG00000121879 |            | 0.19393939 |            | 0.193939394 |             |            | 0.0930233 |
| ENSG00000151414 | 0.35057471 | 0.35670732 | 0.35057471 | 0.356707317 | 0.222222222 | 0.2727273  | 0.25      |
| ENSG00000100216 |            | 0.35393258 |            | 0.353932584 |             |            | 0.4651163 |
| ENSG00000065970 | 0.16566265 | 0.34545455 | 0.16566265 | 0.345454545 | 0.05952381  |            | 0.2848837 |
| ENSG00000101144 |            | 0.48333333 |            | 0.483333333 |             |            | 0.4222222 |
| ENSG00000135185 |            | 0.11764706 |            | 0.117647059 |             |            | 0.425     |
| ENSG00000131650 | 0.44827586 |            | 0.44827586 |             |             |            |           |
| ENSG00000167193 |            | 0.08181818 |            | 0.081818182 |             |            | 0.1860465 |
| ENSG00000177842 |            | 0.36060606 |            | 0.360606061 |             |            | 0.372093  |
| ENSG00000185414 | 0.10179641 | 0.375      | 0.10179641 | 0.375       | 0.266666667 | 0.2386364  | 0.1162791 |
| ENSG00000186222 |            | 0.37575758 |            | 0.375757576 |             |            | 0.3882353 |
| ENSG00000136574 |            | 0.44827586 |            | 0.448275862 |             |            | 0.4772727 |
| ENSG00000163291 |            | 0.22891566 |            | 0.228915663 |             |            | 0.3409091 |
| ENSG00000170011 | 0.17964072 | 0.37272727 | 0.17964072 | 0.372727273 | 0.071428571 | 0.1352941  | 0.304878  |
| ENSG00000177464 | 0.3742515  | 0.40606061 | 0.3742515  | 0.406060606 | 0.403614458 | 0.3895349  | 0.3895349 |
| ENSG00000179603 |            | 0.38484848 |            | 0.384848485 |             |            | 0.377907  |
| ENSG00000187033 |            | 0.08787879 |            | 0.087878788 |             | 0.1104651  | 0.2058824 |
| ENSG00000147400 |            | 0.2030303  |            | 0.203030303 |             |            | 0.1569767 |
| ENSG00000124490 |            | 0.4695122  |            | 0.469512195 |             |            | 0.1395349 |
| ENSG00000197467 | 0.24850299 | 0.3        | 0.24850299 | 0.3         | 0.113095238 | 0.1511628  | 0.4318182 |
| ENSG00000138002 |            | 0.40123457 |            | 0.401234568 |             |            | 0.0988372 |
| ENSG00000079337 | 0.0988024  | 0.3030303  | 0.0988024  | 0.303030303 | 0.073170732 | 0.0705882  | 0.3372093 |
| ENSG00000185437 |            | 0.06707317 |            | 0.067073171 |             |            |           |
| ENSG00000108242 |            | 0.375      |            | 0.375       |             |            | 0.2906977 |
| ENSG00000169255 | 0.08682635 | 0.24233129 | 0.08682635 | 0.242331288 |             |            | 0.347561  |
| ENSG00000143374 | 0.21111111 |            | 0.21111111 |             | 0.1         | 0.1444444  |           |
| ENSG00000162373 | 0.14071856 | 0.16111111 | 0.14071856 | 0.161111111 | 0.220238095 | 0.4244186  | 0.2142857 |
| ENSG00000164494 |            |            |            |             | 0.090909091 | 0.0581395  | 0.0697674 |
| ENSG00000176842 |            | 0.21428571 |            | 0.214285714 |             |            | 0.0764706 |
| ENSG00000125753 |            | 0.32121212 |            | 0.321212121 |             |            | 0.1569767 |
| ENSG00000173950 |            | 0.33333333 |            | 0.333333333 |             |            | 0.3953488 |
| ENSG00000141391 |            | 0.06666667 |            | 0.066666667 |             |            | 0.0777778 |
| ENSG00000114279 | 0.17365269 | 0.40449438 | 0.17365269 | 0.404494382 | 0.18452381  | 0.3058824  | 0.4878049 |
| ENSG00000157851 |            | 0.39393939 |            | 0.393939394 |             |            | 0.3139535 |
| ENSG00000138792 |            | 0.39393939 |            | 0.393939394 |             |            | 0.4069767 |
| ENSG00000130560 |            | 0.45757576 |            | 0.457575758 |             |            | 0.4593023 |
| ENSG00000008277 | 0.4246988  | 0.3445122  | 0.4246988  | 0.344512195 | 0.160714286 | 0.1627907  | 0.4883721 |
| ENSG00000148655 | 0.14371257 |            | 0.14371257 |             | 0.303571429 | 0.4534884  |           |
| ENSG00000081014 |            | 0.42424242 |            | 0.424242424 |             |            | 0.4244186 |
| ENSG00000006788 |            | 0.07878788 |            | 0.078787879 |             |            | 0.3372093 |
| ENSG00000100473 | 0.10778443 | 0.34444444 | 0.10778443 | 0.344444444 | 0.095238095 | 0.1046512  |           |
| ENSG00000163428 |            | 0.45757576 |            | 0.457575758 |             |            | 0.3255814 |
| ENSG00000180869 |            | 0.07777778 |            | 0.077777778 |             |            | 0.1777778 |
| ENSG00000135587 | 0.25301205 |            | 0.25301205 |             | 0.375       | 0.4411765  |           |
| ENSG00000174010 |            | 0.21341463 |            | 0.213414634 |             |            | 0.3139535 |
| ENSG00000112294 |            | 0.33536585 |            | 0.335365854 |             |            | 0.0764706 |

|                 |            |            |            |             |             |  |           |           |
|-----------------|------------|------------|------------|-------------|-------------|--|-----------|-----------|
| ENSG00000103381 |            | 0.06060606 |            | 0.060606061 |             |  |           | 0.372093  |
| ENSG00000152580 |            | 0.42727273 |            | 0.427272727 |             |  |           | 0.4883721 |
| ENSG00000153944 |            | 0.23333333 |            | 0.233333333 |             |  |           | 0.3604651 |
| ENSG00000161664 |            | 0.25914634 |            | 0.259146341 |             |  |           | 0.4767442 |
| ENSG00000170222 |            | 0.4030303  |            | 0.403030303 |             |  |           | 0.3372093 |
| ENSG00000130304 |            | 0.48255814 |            | 0.48255814  |             |  |           | 0.3604651 |
| ENSG00000116833 |            | 0.43333333 |            | 0.433333333 |             |  |           | 0.4825581 |
| ENSG00000218336 |            | 0.36666667 |            | 0.366666667 |             |  |           | 0.1744186 |
| ENSG00000162753 |            | 0.2030303  |            | 0.203030303 |             |  |           | 0.3953488 |
| ENSG00000198056 |            | 0.3597561  |            | 0.359756098 |             |  |           | 0.3604651 |
| ENSG00000134871 |            | 0.4695122  |            | 0.469512195 |             |  |           | 0.2034884 |
| ENSG00000173821 |            | 0.49393939 |            | 0.493939394 |             |  |           | 0.1511628 |
| ENSG00000163576 | 0.40419162 |            | 0.40419162 |             | 0.361445783 |  | 0.3081395 |           |
| ENSG00000132305 | 0.47005988 |            | 0.47005988 |             | 0.208333333 |  | 0.3869048 |           |
| ENSG00000187801 |            |            |            |             | 0.160714286 |  | 0.1511628 | 0.0963855 |
| ENSG00000144451 |            | 0.41515152 |            | 0.415151515 |             |  |           | 0.4534884 |
| ENSG00000244122 |            | 0.37222222 |            | 0.372222222 |             |  |           | 0.1627907 |
| ENSG00000204628 | 0.38372093 |            | 0.38372093 |             | 0.273809524 |  | 0.3837209 | 0.3197674 |
| ENSG00000256895 | 0.45508982 | 0.0969697  | 0.45508982 | 0.096969697 | 0.345238095 |  | 0.3313953 | 0.2732558 |
| ENSG00000171643 | 0.47904192 | 0.34444444 | 0.47904192 | 0.344444444 | 0.398809524 |  | 0.4476744 | 0.4545455 |
| ENSG00000033867 | 0.22155689 | 0.42352941 | 0.22155689 | 0.423529412 |             |  | 0.1046512 | 0.1891892 |
| ENSG00000100883 | 0.29341317 |            | 0.29341317 |             | 0.4         |  | 0.4166667 |           |
| ENSG00000138161 | 0.49401198 |            | 0.49401198 |             | 0.5         |  | 0.4709302 |           |
| ENSG00000244617 |            | 0.16969697 |            | 0.16969697  |             |  |           | 0.3837209 |
| ENSG00000089685 | 0.38922156 | 0.43636364 | 0.38922156 | 0.436363636 | 0.494047619 |  | 0.4127907 | 0.4651163 |
| ENSG00000141519 |            | 0.40909091 |            | 0.409090909 |             |  |           | 0.4825581 |
| ENSG00000127184 | 0.1091954  |            | 0.1091954  |             |             |  |           | 0.1882353 |
| ENSG00000248905 | 0.07777778 | 0.48876404 | 0.07777778 | 0.488764045 | 0.079545455 |  | 0.0666667 | 0.4767442 |
| ENSG00000023572 | 0.26807229 |            | 0.26807229 |             | 0.397590361 |  | 0.4638554 |           |
| ENSG00000175137 | 0.2994012  | 0.14242424 | 0.2994012  | 0.142424242 | 0.464285714 |  | 0.4767442 | 0.4294118 |
| ENSG00000132855 | 0.1257485  |            | 0.1257485  |             | 0.06547619  |  | 0.0523256 |           |
| ENSG00000196230 |            | 0.18787879 |            | 0.187878788 |             |  |           | 0.2325581 |
| ENSG00000135847 | 0.19879518 |            | 0.19879518 |             | 0.285714286 |  | 0.4244186 |           |
| ENSG00000151500 | 0.07142857 |            | 0.07142857 |             |             |  |           |           |
| ENSG00000144161 |            | 0.15454545 |            | 0.154545455 |             |  |           |           |
| ENSG00000119685 |            | 0.38823529 |            | 0.388235294 | 0.321428571 |  | 0.4302326 | 0.4534884 |
| ENSG00000164181 | 0.27575758 | 0.11666667 | 0.27575758 | 0.116666667 | 0.05952381  |  | 0.1104651 | 0.1918605 |
| ENSG00000163638 |            | 0.28181818 |            | 0.281818182 |             |  |           | 0.4534884 |
| ENSG00000147364 |            | 0.28235294 |            | 0.282352941 |             |  |           | 0.2159091 |
| ENSG00000204560 | 0.24719101 |            | 0.24719101 |             | 0.420454545 |  | 0.3604651 |           |
| ENSG00000106351 |            | 0.16666667 |            | 0.166666667 |             |  |           |           |
| ENSG00000150459 |            | 0.49085366 |            | 0.490853659 |             |  |           | 0.3081395 |
| ENSG00000174586 |            | 0.46060606 |            | 0.460606061 |             |  |           | 0.3068182 |
| ENSG00000167972 | 0.25149701 |            | 0.25149701 |             |             |  |           |           |
| ENSG00000213204 |            | 0.26060606 |            | 0.260606061 | 0.188888889 |  | 0.1777778 | 0.2352941 |
| ENSG00000161618 |            | 0.30909091 |            | 0.309090909 |             |  |           | 0.1860465 |
| ENSG00000213722 | 0.13529412 |            | 0.13529412 |             | 0.428571429 |  | 0.4659091 |           |
| ENSG00000128165 |            | 0.34242424 |            | 0.342424242 |             |  |           | 0.3139535 |
| ENSG00000105486 | 0.30681818 | 0.44848485 | 0.30681818 | 0.448484848 | 0.088888889 |  |           | 0.2151163 |
| ENSG00000100220 |            | 0.16969697 |            | 0.16969697  |             |  |           | 0.4418605 |
| ENSG00000148926 | 0.11363636 |            | 0.11363636 |             |             |  |           |           |
| ENSG00000248098 | 0.29640719 |            | 0.29640719 |             | 0.458333333 |  | 0.4883721 |           |
| ENSG00000163378 |            | 0.1969697  |            | 0.196969697 |             |  |           | 0.4651163 |
| ENSG00000177225 |            | 0.471875   |            | 0.471875    |             |  |           | 0.4593023 |

|                 |            |            |            |             |             |           |           |
|-----------------|------------|------------|------------|-------------|-------------|-----------|-----------|
| ENSG00000187164 |            | 0.12121212 |            | 0.121212121 |             |           |           |
| ENSG00000114125 |            | 0.16969697 |            | 0.16969697  |             |           | 0.1744186 |
| ENSG00000118596 | 0.1875     | 0.375      | 0.1875     | 0.375       | 0.126506024 | 0.1802326 | 0.3546512 |
| ENSG00000115902 |            | 0.10135135 |            | 0.101351351 |             |           |           |
| ENSG00000205300 | 0.18263473 |            | 0.18263473 |             | 0.267857143 | 0.2093023 |           |
| ENSG00000048707 |            |            |            |             |             |           | 0.125     |
| ENSG00000089195 |            | 0.17878788 |            | 0.178787879 |             |           | 0.4069767 |
| ENSG00000114416 | 0.16467066 |            | 0.16467066 |             |             |           |           |
| ENSG00000135604 |            |            |            |             |             |           | 0.297619  |
| ENSG00000119471 |            | 0.35757576 |            | 0.357575758 |             |           | 0.4069767 |
| ENSG00000182606 |            | 0.39393939 |            | 0.393939394 |             |           | 0.475     |
| ENSG00000183963 | 0.30722892 | 0.0969697  | 0.30722892 | 0.096969697 | 0.433333333 | 0.4886364 | 0.4244186 |
| ENSG00000198792 |            | 0.25757576 |            | 0.257575758 |             |           | 0.3255814 |
| ENSG00000127463 |            | 0.14417178 |            | 0.144171779 |             |           |           |
| ENSG00000167565 | 0.13068182 | 0.14814815 | 0.13068182 | 0.148148148 | 0.111111111 | 0.0909091 |           |
| ENSG00000134056 | 0.175      |            | 0.175      |             | 0.390243902 | 0.2159091 |           |
| ENSG00000186075 |            | 0.49444444 |            | 0.494444444 |             |           | 0.2727273 |
| ENSG00000184154 |            | 0.06060606 |            | 0.060606061 |             |           | 0.2202381 |
| ENSG00000124596 |            | 0.1969697  |            | 0.196969697 |             |           | 0.244186  |
| ENSG00000175766 | 0.18562874 |            | 0.18562874 |             | 0.053571429 |           |           |
| ENSG00000137821 | 0.44886364 |            | 0.44886364 |             | 0.322222222 | 0.4659091 |           |
| ENSG00000132635 | 0.45508982 |            | 0.45508982 |             | 0.144578313 | 0.1627907 |           |
| ENSG00000174206 |            | 0.46060606 |            | 0.460606061 |             |           | 0.4302326 |
| ENSG00000171793 |            | 0.06666667 |            | 0.066666667 |             |           | 0.1569767 |
| ENSG00000214021 | 0.16766467 | 0.40909091 | 0.16766467 | 0.409090909 | 0.210843373 | 0.3197674 | 0.4883721 |
| ENSG00000108924 |            | 0.31707317 |            | 0.317073171 |             |           | 0.3837209 |
| ENSG00000253207 | 0.48447205 |            | 0.48447205 |             | 0.303571429 | 0.3058824 |           |
| ENSG00000204386 |            |            |            |             |             |           | 0.0872093 |
| ENSG00000187533 |            | 0.14848485 |            | 0.148484848 |             |           |           |
| ENSG00000136868 |            | 0.43902439 |            | 0.43902439  |             |           | 0.4777778 |
| ENSG00000114439 |            | 0.19186047 |            | 0.191860465 |             | 0.1352941 | 0.0853659 |
| ENSG00000171282 |            | 0.20909091 |            | 0.209090909 |             |           | 0.3023256 |
| ENSG00000146733 | 0.08383234 | 0.23595506 | 0.08383234 | 0.235955056 |             | 0.0882353 | 0.3571429 |
| ENSG00000166783 |            | 0.08181818 |            | 0.081818182 |             |           | 0.1976744 |
| ENSG00000107651 |            | 0.48787879 |            | 0.487878788 |             |           | 0.4176471 |
| ENSG00000203485 |            | 0.42993631 |            | 0.429936306 |             |           | 0.1369048 |
| ENSG00000022355 |            | 0.34662577 |            | 0.346625767 |             |           | 0.4705882 |
| ENSG00000184374 |            |            |            |             |             |           | 0.2790698 |
| ENSG00000156466 |            | 0.05151515 |            | 0.051515152 |             |           |           |
| ENSG00000100902 | 0.37125749 |            | 0.37125749 |             | 0.377777778 | 0.4090909 |           |
| ENSG00000055130 | 0.16111111 |            | 0.16111111 |             | 0.375       | 0.4545455 |           |
| ENSG00000100033 | 0.49444444 |            | 0.49444444 |             | 0.288888889 | 0.2840909 |           |
| ENSG00000188818 | 0.4011976  |            | 0.4011976  |             | 0.19047619  | 0.2616279 | 0.1410256 |
| ENSG00000119383 | 0.23888889 | 0.26436782 | 0.23888889 | 0.264367816 | 0.4         | 0.3863636 | 0.3895349 |
| ENSG00000187244 |            | 0.33333333 |            | 0.333333333 |             |           | 0.4127907 |
| ENSG00000204220 | 0.19277108 |            | 0.19277108 |             | 0.355421687 | 0.3255814 |           |
| ENSG00000135932 |            | 0.21515152 |            | 0.215151515 |             |           | 0.3139535 |
| ENSG00000148396 | 0.15116279 | 0.47878788 | 0.15116279 | 0.478787879 |             |           | 0.2093023 |
| ENSG00000259024 |            | 0.07878788 |            | 0.078787879 |             |           | 0.4069767 |
| ENSG00000160539 | 0.22754491 | 0.3030303  | 0.22754491 | 0.303030303 | 0.470238095 | 0.4709302 | 0.2470588 |
| ENSG00000109670 | 0.08682635 |            | 0.08682635 |             | 0.476190476 | 0.4883721 |           |
| ENSG00000119280 |            | 0.17575758 |            | 0.175757576 |             |           | 0.2965116 |
| ENSG00000176055 |            | 0.40909091 |            | 0.409090909 |             |           | 0.3372093 |
| ENSG00000175899 | 0.39520958 |            | 0.39520958 |             | 0.119047619 | 0.1104651 |           |



|                 |            |            |            |             |             |           |           |
|-----------------|------------|------------|------------|-------------|-------------|-----------|-----------|
| ENSG00000163879 | 0.08982036 | 0.49393939 | 0.08982036 | 0.493939394 | 0.380952381 | 0.2267442 | 0.372093  |
| ENSG00000144642 |            | 0.33529412 |            | 0.335294118 |             |           | 0.4512195 |
| ENSG00000160271 | 0.24850299 | 0.40606061 | 0.24850299 | 0.406060606 | 0.488095238 | 0.4764706 | 0.4302326 |
| ENSG00000014824 | 0.16060606 | 0.26060606 | 0.16060606 | 0.260606061 |             |           |           |
| ENSG00000107623 |            | 0.18390805 |            | 0.183908046 |             |           | 0.2613636 |
| ENSG00000164002 | 0.25748503 |            | 0.25748503 |             | 0.482142857 | 0.3604651 |           |
| ENSG00000145623 |            | 0.41717791 |            | 0.417177914 |             |           | 0.4318182 |
| ENSG00000180525 |            |            |            |             |             |           | 0.0903614 |
| ENSG00000161800 | 0.29640719 |            | 0.29640719 |             |             |           |           |
| ENSG00000115840 | 0.40963855 | 0.30555556 | 0.40963855 | 0.305555556 | 0.115853659 | 0.0872093 | 0.2045455 |
| ENSG00000149452 | 0.05688623 |            | 0.05688623 |             | 0.261904762 | 0.2764706 |           |
| ENSG00000125900 | 0.41916168 |            | 0.41916168 |             | 0.255952381 | 0.2965116 |           |
| ENSG00000012817 |            | 0.29545455 |            | 0.295454545 |             |           |           |
| ENSG00000165588 |            | 0.0969697  |            | 0.096969697 |             |           |           |
| ENSG00000163444 |            | 0.39393939 |            | 0.393939394 |             |           | 0.1744186 |
| ENSG00000171631 | 0.18125    | 0.11419753 | 0.18125    | 0.114197531 |             |           | 0.0795455 |
| ENSG00000151117 |            | 0.16060606 |            | 0.160606061 |             |           | 0.3470588 |
| ENSG00000103326 |            | 0.24848485 |            | 0.248484848 |             |           | 0.255814  |
| ENSG00000164116 | 0.3258427  | 0.3902439  | 0.3258427  | 0.390243902 | 0.226190476 | 0.2616279 | 0.1882353 |
| ENSG00000197915 |            | 0.16363636 |            | 0.163636364 |             |           | 0.3430233 |
| ENSG00000187098 | 0.05688623 | 0.28484848 | 0.05688623 | 0.284848485 | 0.482142857 | 0.4360465 | 0.3255814 |
| ENSG00000130340 |            | 0.23939394 |            | 0.239393939 |             |           | 0.1686047 |
| ENSG00000137414 | 0.30555556 | 0.24848485 | 0.30555556 | 0.248484848 |             | 0.0795455 | 0.0581395 |
| ENSG00000115461 |            | 0.05       |            | 0.05        |             |           | 0.0568182 |
| ENSG00000158104 | 0.28443114 |            | 0.28443114 |             | 0.178571429 | 0.2151163 |           |
| ENSG00000140463 |            | 0.08787879 |            | 0.087878788 |             |           | 0.2151163 |
| ENSG00000169247 | 0.43113772 | 0.49090909 | 0.43113772 | 0.490909091 | 0.25        | 0.2848837 | 0.3255814 |
| ENSG00000196466 |            | 0.49418605 |            | 0.494186047 |             |           | 0.4204545 |
| ENSG00000127603 | 0.46625767 | 0.44848485 | 0.46625767 | 0.448484848 | 0.186746988 | 0.1918605 | 0.3197674 |
| ENSG00000204688 | 0.07777778 | 0.4        | 0.07777778 | 0.4         | 0.177777778 | 0.1511628 | 0.4545455 |
| ENSG00000214063 | 0.41317365 | 0.48888889 | 0.41317365 | 0.488888889 | 0.44047619  | 0.4418605 | 0.3181818 |
| ENSG00000213760 |            | 0.34545455 |            | 0.345454545 |             |           | 0.4069767 |
| ENSG00000115657 | 0.40804598 |            | 0.40804598 |             | 0.182926829 | 0.1463415 |           |
| ENSG00000104866 | 0.13772455 | 0.07575758 | 0.13772455 | 0.075757576 |             |           | 0.0764706 |
| ENSG00000221866 |            | 0.25757576 |            | 0.257575758 |             |           | 0.4476744 |
| ENSG00000166669 | 0.478125   | 0.38787879 | 0.478125   | 0.387878788 |             | 0.347561  | 0.4302326 |
| ENSG00000182979 | 0.0797546  |            | 0.0797546  |             | 0.333333333 | 0.3895349 |           |
| ENSG00000063322 |            | 0.41049383 |            | 0.410493827 |             |           | 0.3690476 |
| ENSG00000058091 | 0.15568862 | 0.21515152 | 0.15568862 | 0.215151515 | 0.077380952 |           | 0.25      |
| ENSG00000149100 | 0.07228916 | 0.3045977  | 0.07228916 | 0.304597701 |             |           | 0.0909091 |
| ENSG00000233198 |            |            |            |             | 0.19047619  | 0.1453488 |           |
| ENSG00000180432 |            | 0.45454545 |            | 0.454545455 |             |           | 0.2093023 |
| ENSG00000173530 |            | 0.22424242 |            | 0.224242424 |             |           | 0.3604651 |
| ENSG00000178229 | 0.28742515 |            | 0.28742515 |             | 0.458333333 | 0.4360465 |           |
| ENSG00000050820 | 0.36526946 | 0.49444444 | 0.36526946 | 0.494444444 | 0.428571429 | 0.4244186 | 0.5       |
| ENSG00000070778 |            | 0.31818182 |            | 0.318181818 |             |           | 0.377907  |
| ENSG00000011105 |            | 0.45151515 |            | 0.451515152 |             |           | 0.3023256 |
| ENSG00000112164 |            | 0.33333333 |            | 0.333333333 |             |           | 0.3522727 |
| ENSG00000122417 |            | 0.38414634 |            | 0.384146341 | 0.089285714 | 0.1511628 | 0.3928571 |
| ENSG00000114737 | 0.16467066 | 0.16768293 | 0.16467066 | 0.167682927 | 0.337349398 | 0.2674419 | 0.3255814 |
| ENSG00000144401 | 0.4251497  | 0.38333333 | 0.4251497  | 0.383333333 | 0.214285714 | 0.1162791 | 0.25      |
| ENSG00000114503 | 0.11976048 | 0.31212121 | 0.11976048 | 0.312121212 | 0.083333333 | 0.0930233 | 0.2732558 |
| ENSG00000164729 |            | 0.38109756 |            | 0.381097561 |             |           |           |
| ENSG00000156218 |            | 0.24848485 |            | 0.248484848 |             |           |           |

|                 |            |            |            |             |             |           |           |
|-----------------|------------|------------|------------|-------------|-------------|-----------|-----------|
| ENSG00000121417 | 0.23493976 | 0.14329268 | 0.23493976 | 0.143292683 | 0.329545455 | 0.2682927 | 0.2916667 |
| ENSG00000189067 |            | 0.33333333 |            | 0.333333333 |             |           | 0.4534884 |
| ENSG00000174106 |            | 0.31288344 |            | 0.312883436 |             |           | 0.2034884 |
| ENSG00000179886 |            | 0.39534884 |            | 0.395348837 |             |           | 0.3295455 |
| ENSG00000213780 | 0.25149701 | 0.11818182 | 0.25149701 | 0.118181818 | 0.452380952 | 0.3953488 |           |
| ENSG00000187513 |            | 0.34545455 |            | 0.345454545 |             |           | 0.3313953 |
| ENSG00000128050 |            | 0.246875   |            | 0.246875    |             |           | 0.4534884 |
| ENSG00000203630 | 0.10795455 |            | 0.10795455 |             |             |           |           |
| ENSG00000126773 |            | 0.10606061 |            | 0.106060606 | 0.144444444 | 0.1666667 | 0.3953488 |
| ENSG00000128709 | 0.12727273 | 0.32424242 | 0.12727273 | 0.324242424 | 0.422619048 | 0.4244186 | 0.4176471 |
| ENSG00000074590 |            | 0.38787879 |            | 0.387878788 |             |           | 0.0755814 |
| ENSG00000183307 | 0.47305389 | 0.33939394 | 0.47305389 | 0.339393939 | 0.488095238 | 0.4764706 | 0.3941176 |
| ENSG00000160050 |            | 0.26993865 |            | 0.26993865  |             |           | 0.1744186 |
| ENSG00000134317 | 0.4491018  | 0.41158537 | 0.4491018  | 0.411585366 |             |           | 0.3795181 |
| ENSG00000166510 |            | 0.29268293 |            | 0.292682927 |             |           | 0.3988095 |
| ENSG00000106511 | 0.2754491  | 0.3258427  | 0.2754491  | 0.325842697 | 0.273809524 | 0.1802326 | 0.4825581 |
| ENSG00000129028 | 0.05389222 | 0.30487805 | 0.05389222 | 0.304878049 | 0.178571429 | 0.127907  | 0.3139535 |
| ENSG00000007062 | 0.48802395 | 0.48484848 | 0.48802395 | 0.484848485 | 0.345238095 | 0.2179487 | 0.4186047 |
| ENSG00000206562 |            | 0.3969697  |            | 0.396969697 |             |           | 0.4825581 |
| ENSG00000249853 |            | 0.12121212 |            | 0.121212121 | 0.193181818 | 0.2       | 0.2777778 |
| ENSG00000156687 |            |            |            |             |             |           | 0.0639535 |
| ENSG00000119614 |            | 0.17791411 |            | 0.17791411  |             |           | 0.2941176 |
| ENSG00000105825 | 0.15789474 |            | 0.15789474 |             |             |           | 0.2209302 |
| ENSG00000155966 |            | 0.1030303  |            | 0.103030303 |             |           | 0.1058824 |
| ENSG00000121749 |            | 0.26363636 |            | 0.263636364 |             |           | 0.1802326 |
| ENSG00000084112 |            | 0.27439024 |            | 0.274390244 |             |           | 0.3255814 |
| ENSG00000145020 |            | 0.27575758 |            | 0.275757576 |             |           | 0.1190476 |
| ENSG00000186564 | 0.14371257 |            | 0.14371257 |             | 0.202380952 | 0.2034884 |           |
| ENSG00000152620 | 0.18862275 | 0.31111111 | 0.18862275 | 0.311111111 | 0.327380952 | 0.2951807 | 0.1111111 |
| ENSG00000113361 |            | 0.48787879 |            | 0.487878788 |             |           | 0.4476744 |
| ENSG00000182870 |            |            |            |             | 0.208333333 | 0.244186  |           |
| ENSG00000107485 |            | 0.22424242 |            | 0.224242424 |             |           | 0.3197674 |
| ENSG00000133142 | 0.39820359 |            | 0.39820359 |             | 0.476190476 | 0.4352941 |           |
| ENSG00000197162 |            | 0.15454545 |            | 0.154545455 |             |           |           |
| ENSG00000163545 |            | 0.13333333 |            | 0.133333333 |             |           | 0.1569767 |
| ENSG00000116977 | 0.38554217 | 0.36666667 | 0.38554217 | 0.366666667 | 0.457831325 | 0.4883721 | 0.4404762 |
| ENSG00000251283 | 0.21987952 | 0.3258427  | 0.21987952 | 0.325842697 |             |           | 0.4268293 |
| ENSG00000160953 | 0.29041916 | 0.25454545 | 0.29041916 | 0.254545455 | 0.409638554 | 0.3313953 | 0.4411765 |
| ENSG00000119121 |            | 0.46666667 |            | 0.466666667 |             |           | 0.2383721 |
| ENSG00000215428 |            | 0.12121212 |            | 0.121212121 |             |           | 0.4593023 |
| ENSG00000184575 | 0.38764045 |            | 0.38764045 |             | 0.222222222 | 0.1477273 |           |
| ENSG00000198626 |            | 0.34848485 |            | 0.348484848 |             |           | 0.2848837 |
| ENSG00000113448 | 0.21856287 | 0.49425287 | 0.21856287 | 0.494252874 | 0.392857143 | 0.377907  | 0.4156627 |
| ENSG00000197324 |            | 0.09815951 |            | 0.098159509 |             |           | 0.1369048 |
| ENSG00000140522 | 0.10240964 | 0.38109756 | 0.10240964 | 0.381097561 |             |           | 0.202381  |
| ENSG00000164556 | 0.25449102 | 0.09393939 | 0.25449102 | 0.093939394 | 0.470238095 | 0.4651163 |           |
| ENSG00000188828 |            | 0.37037037 |            | 0.37037037  |             |           | 0.3430233 |
| ENSG00000172782 |            | 0.2183908  |            | 0.218390805 |             |           | 0.3837209 |
| ENSG00000119333 |            | 0.13939394 |            | 0.139393939 |             |           | 0.4767442 |
| ENSG00000163938 | 0.48203593 |            | 0.48203593 |             | 0.494047619 | 0.4767442 |           |
| ENSG00000168807 |            | 0.29878049 |            | 0.298780488 |             |           | 0.4709302 |
| ENSG00000130037 | 0.43712575 | 0.33536585 | 0.43712575 | 0.335365854 | 0.337349398 | 0.452381  | 0.4534884 |
| ENSG00000104825 |            | 0.26687117 |            | 0.266871166 |             |           | 0.372093  |
| ENSG00000255317 | 0.25748503 |            | 0.25748503 |             | 0.398809524 | 0.3313953 |           |

|                 |            |            |            |             |             |           |           |
|-----------------|------------|------------|------------|-------------|-------------|-----------|-----------|
| ENSG00000116005 | 0.12643678 | 0.2816092  | 0.12643678 | 0.281609195 | 0.088888889 | 0.2386364 | 0.3636364 |
| ENSG00000214706 |            |            |            |             | 0.232142857 | 0.3333333 |           |
| ENSG00000101544 |            | 0.38888889 |            | 0.388888889 |             |           | 0.125     |
| ENSG00000198298 | 0.09444444 |            | 0.09444444 |             |             |           |           |
| ENSG00000117676 | 0.29518072 | 0.44545455 | 0.29518072 | 0.445454545 | 0.232142857 | 0.25      | 0.2732558 |
| ENSG00000170345 |            |            |            |             | 0.392857143 | 0.4825581 |           |
| ENSG00000152503 | 0.19375    |            | 0.19375    |             |             |           | 0.3977273 |
| ENSG00000048545 | 0.42814371 |            | 0.42814371 |             | 0.138554217 | 0.1352941 |           |
| ENSG00000016391 | 0.21341463 | 0.08333333 | 0.21341463 | 0.083333333 | 0.05        | 0.1590909 | 0.0731707 |
| ENSG00000187714 | 0.06586826 |            | 0.06586826 |             | 0.267857143 | 0.2093023 |           |
| ENSG00000160097 |            | 0.39329268 |            | 0.393292683 |             |           | 0.2294118 |
| ENSG00000161940 | 0.1257485  | 0.08333333 | 0.1257485  | 0.083333333 |             |           |           |
| ENSG00000204619 | 0.05688623 | 0.10555556 | 0.05688623 | 0.105555556 | 0.05952381  | 0.1104651 | 0.3488372 |
| ENSG00000166682 | 0.13483146 | 0.34848485 | 0.13483146 | 0.348484848 | 0.297619048 | 0.4186047 | 0.1860465 |
| ENSG00000163743 |            | 0.4        |            | 0.4         |             |           | 0.3488372 |
| ENSG00000139880 |            | 0.40243902 |            | 0.402439024 |             |           | 0.1395349 |
| ENSG00000175643 |            | 0.26666667 |            | 0.266666667 |             |           | 0.3214286 |
| ENSG00000138755 |            | 0.49393939 |            | 0.493939394 |             |           | 0.0714286 |
| ENSG00000112624 |            | 0.06441718 |            | 0.064417178 |             |           | 0.1130952 |
| ENSG00000108395 | 0.15361446 |            | 0.15361446 |             | 0.5         | 0.4294118 |           |
| ENSG00000120279 |            | 0.45757576 |            | 0.457575758 |             |           | 0.4418605 |
| ENSG00000139324 |            | 0.21515152 |            | 0.215151515 |             |           |           |
| ENSG00000257482 | 0.40662651 |            | 0.40662651 |             | 0.234939759 | 0.3488372 |           |
| ENSG00000172757 | 0.38922156 |            | 0.38922156 |             | 0.06547619  | 0.0639535 |           |
| ENSG00000139055 | 0.43712575 |            | 0.43712575 |             | 0.130952381 | 0.1744186 |           |
| ENSG00000128294 |            | 0.45757576 |            | 0.457575758 |             |           | 0.372093  |
| ENSG00000165732 |            | 0.37931034 |            | 0.379310345 |             |           | 0.125     |
| ENSG00000115526 | 0.35928144 | 0.47878788 | 0.35928144 | 0.478787879 | 0.375       | 0.3430233 | 0.3081395 |
| ENSG00000070476 |            | 0.4969697  |            | 0.496969697 |             |           | 0.4709302 |
| ENSG00000148120 |            | 0.22699387 |            | 0.226993865 | 0.077380952 | 0.0930233 | 0.4186047 |
| ENSG00000139263 |            |            |            |             |             |           | 0.1022727 |
| ENSG00000108551 |            | 0.18235294 |            | 0.182352941 |             |           | 0.3333333 |
| ENSG00000107959 | 0.45454545 | 0.325      | 0.45454545 | 0.325       | 0.38372093  | 0.3333333 | 0.255814  |
| ENSG00000156531 |            | 0.20253165 |            | 0.202531646 |             |           | 0.4235294 |
| ENSG00000152942 | 0.45783133 |            | 0.45783133 |             | 0.103658537 | 0.1506024 |           |
| ENSG00000119906 |            | 0.17222222 |            | 0.172222222 |             |           | 0.4431818 |
| ENSG00000117523 |            | 0.2        |            | 0.2         |             |           | 0.1686747 |
| ENSG00000103544 |            | 0.34545455 |            | 0.345454545 |             |           | 0.4470588 |
| ENSG00000182473 | 0.34269663 | 0.5        | 0.34269663 | 0.5         | 0.077777778 | 0.1477273 | 0.4476744 |
| ENSG00000115935 |            | 0.48466258 |            | 0.484662577 |             |           | 0.127907  |
| ENSG00000198189 |            |            |            |             | 0.136904762 | 0.1104651 |           |
| ENSG00000133657 |            | 0.20606061 |            | 0.206060606 | 0.144444444 | 0.1022727 | 0.2235294 |
| ENSG00000154917 |            | 0.23333333 |            | 0.233333333 |             |           | 0.4302326 |
| ENSG00000204610 | 0.2994012  | 0.0969697  | 0.2994012  | 0.096969697 | 0.095238095 | 0.1235294 | 0.1744186 |
| ENSG00000151883 |            | 0.38535032 |            | 0.385350318 |             |           | 0.3470588 |
| ENSG00000125149 |            | 0.44817073 |            | 0.448170732 |             |           | 0.4244186 |
| ENSG00000149218 |            | 0.47701149 |            | 0.477011494 |             |           | 0.377907  |
| ENSG00000132879 |            | 0.43333333 |            | 0.433333333 |             |           | 0.3809524 |
| ENSG00000173114 | 0.21556886 |            | 0.21556886 |             | 0.31547619  | 0.2325581 |           |
| ENSG00000215595 |            | 0.46363636 |            | 0.463636364 |             |           | 0.2965116 |
| ENSG00000167461 |            | 0.31666667 |            | 0.316666667 |             |           | 0.3313953 |
| ENSG00000133103 |            | 0.38050314 |            | 0.380503145 |             |           | 0.4767442 |
| ENSG00000171903 | 0.25748503 | 0.45454545 | 0.25748503 | 0.454545455 | 0.355263158 | 0.4125    | 0.3181818 |
| ENSG00000197044 |            | 0.36363636 |            | 0.363636364 |             |           | 0.4127907 |

|                 |            |            |            |             |             |           |           |
|-----------------|------------|------------|------------|-------------|-------------|-----------|-----------|
| ENSG00000132297 | 0.32777778 |            | 0.32777778 |             |             | 0.5       |           |
| ENSG00000213221 | 0.45426829 |            | 0.45426829 |             |             | 0.3289474 |           |
| ENSG00000234745 | 0.45       |            | 0.45       |             |             | 0.2906977 |           |
| ENSG00000169756 | 0.47222222 |            | 0.47222222 |             |             | 0.1363636 |           |
| ENSG00000081665 | 0.34242424 |            | 0.34242424 |             |             | 0.3430233 |           |
| ENSG00000061936 | 0.32121212 | 0.24848485 | 0.32121212 | 0.24848488  |             |           |           |
| ENSG00000140320 | 0.07784431 |            | 0.07784431 |             |             |           |           |
| ENSG00000163110 | 0.49444444 |            | 0.49444444 |             |             | 0.4642857 |           |
| ENSG00000182752 | 0.49431818 | 0.43333333 | 0.49431818 | 0.43333333  | 0.43333333  | 0.4318182 | 0.4069767 |
| ENSG00000137747 | 0.38181818 | 0.35060976 | 0.38181818 | 0.35060975  | 0.353658537 | 0.3470588 | 0.4204545 |
| ENSG00000079387 | 0.18787879 |            | 0.18787878 | 0.238095238 |             | 0.1931818 | 0.1976744 |
| ENSG00000115956 | 0.34431138 | 0.42987805 | 0.34431138 | 0.42987804  | 0.244047619 | 0.3023256 | 0.2111111 |
| ENSG00000156508 | 0.43712575 | 0.24444444 | 0.43712575 | 0.24444444  | 0.452380952 | 0.3837209 | 0.3181818 |
| ENSG00000058063 | 0.37724551 | 0.16470588 | 0.37724551 | 0.16470588  |             | 0.0697674 | 0.4418605 |
| ENSG00000167800 | 0.45555556 |            | 0.45555556 |             |             | 0.3863636 |           |
| ENSG00000180155 | 0.1746988  | 0.22777778 | 0.1746988  | 0.22777778  | 0.470238095 | 0.3764706 | 0.373494  |
| ENSG00000233488 | 0.22988506 |            | 0.22988505 |             |             | 0.4883721 |           |
| ENSG00000168763 | 0.07777778 |            | 0.07777778 |             |             |           |           |
| ENSG00000133063 | 0.09770115 |            | 0.09770114 |             |             | 0.1022727 |           |
| ENSG00000129932 | 0.35227273 | 0.25454545 | 0.35227273 | 0.25454545  | 0.3         | 0.3295455 | 0.4127907 |
| ENSG00000143674 | 0.46969697 |            | 0.46969697 |             |             | 0.3197674 |           |
| ENSG00000155666 | 0.26047904 | 0.42682927 | 0.26047904 | 0.42682926  |             | 0.4651163 |           |
| ENSG00000181885 | 0.45       |            | 0.45       |             |             | 0.2616279 |           |
| ENSG00000155850 | 0.2030303  |            | 0.2030303  |             |             | 0.4047619 |           |
| ENSG00000077935 | 0.46363636 |            | 0.46363636 |             |             | 0.4941176 |           |
| ENSG00000167311 | 0.2994012  | 0.22424242 | 0.2994012  | 0.22424242  | 0.458333333 | 0.4651163 | 0.2529412 |
| ENSG00000100979 | 0.39520958 |            | 0.39520958 | 0.446428571 |             | 0.372093  |           |
| ENSG00000110367 | 0.40229885 |            | 0.40229885 |             |             | 0.4772727 |           |
| ENSG00000213512 | 0.38372093 |            | 0.38372093 |             |             | 0.195122  |           |
| ENSG00000178385 | 0.35757576 |            | 0.35757578 |             |             |           |           |
| ENSG00000112539 | 0.38787879 |            | 0.38787879 |             |             |           |           |
| ENSG00000073921 | 0.20606061 |            | 0.20606060 |             |             | 0.255814  |           |
| ENSG00000137491 | 0.43712575 | 0.19393939 | 0.43712575 | 0.19393939  | 0.404761905 | 0.4476744 | 0.4011628 |
| ENSG00000110713 | 0.47575758 |            | 0.47575756 |             |             | 0.4127907 |           |
| ENSG00000111752 | 0.48863636 | 0.48447205 | 0.48863636 | 0.48447205  | 0.255555556 | 0.3409091 | 0.4883721 |
| ENSG00000204138 | 0.29754601 |            | 0.29754601 |             |             | 0.0930233 |           |
| ENSG00000164307 | 0.47752809 | 0.35757576 | 0.47752809 | 0.35757578  | 0.466666667 | 0.5       | 0.372093  |
| ENSG00000122779 | 0.40718563 | 0.28658537 | 0.40718563 | 0.28658536  |             | 0.4360465 |           |
| ENSG00000165794 | 0.2969697  |            | 0.29696969 |             |             | 0.4186047 |           |
| ENSG00000104549 | 0.29041916 |            | 0.29041916 |             |             | 0.0909091 |           |
| ENSG00000177398 | 0.19161677 | 0.42987805 | 0.19161677 | 0.42987804  |             | 0.494186  |           |
| ENSG00000107371 | 0.16158537 |            | 0.16158536 |             |             | 0.127907  |           |
| ENSG00000095110 | 0.4494382  |            | 0.4494382  | 0.410714286 |             | 0.4709302 |           |
| ENSG00000131626 | 0.13173653 | 0.37423313 | 0.13173653 | 0.37423312  | 0.125       | 0.1860465 | 0.2093023 |
| ENSG00000152556 | 0.36227545 | 0.39634146 | 0.36227545 | 0.39634146  | 0.267857143 | 0.1931818 | 0.2325581 |
| ENSG00000100644 | 0.1030303  |            | 0.1030303  |             |             | 0.2383721 |           |
| ENSG00000248727 | 0.21511628 |            | 0.21511627 |             |             | 0.2954545 |           |
| ENSG00000115942 | 0.48333333 |            | 0.48333333 |             |             | 0.0581395 |           |
| ENSG00000227975 | 0.49386503 |            | 0.49386503 |             |             | 0.402439  |           |
| ENSG00000134287 | 0.45151515 | 0.34146341 | 0.45151515 | 0.34146341  |             | 0.4767442 |           |
| ENSG00000196071 | 0.18787879 |            | 0.18787878 |             |             | 0.4       |           |
| ENSG00000130921 | 0.33832335 | 0.23030303 | 0.33832335 | 0.23030303  | 0.416666667 | 0.2616279 |           |
| ENSG00000172667 | 0.39939024 |            | 0.39939024 | 0.083333333 |             | 0.0568182 |           |
| ENSG00000008516 | 0.10493827 |            | 0.10493827 |             |             |           |           |

|                 |            |            |            |             |             |           |           |
|-----------------|------------|------------|------------|-------------|-------------|-----------|-----------|
| ENSG00000104938 |            | 0.31212121 |            | 0.312121212 |             |           | 0.3430233 |
| ENSG00000127831 |            | 0.38181818 |            | 0.381818182 |             |           | 0.1235294 |
| ENSG00000132024 | 0.31736527 | 0.28181818 | 0.31736527 | 0.281818182 |             |           | 0.2882353 |
| ENSG00000100387 |            | 0.42727273 |            | 0.427272727 |             |           | 0.2209302 |
| ENSG00000008083 |            | 0.14666667 |            | 0.146666667 |             |           |           |
| ENSG00000143641 |            | 0.45757576 |            | 0.457575758 |             |           | 0.4772727 |
| ENSG00000169129 |            | 0.18787879 |            | 0.187878788 |             |           | 0.3895349 |
| ENSG00000162706 |            | 0.12643678 |            | 0.126436782 |             |           | 0.4545455 |
| ENSG00000069974 |            | 0.22413793 |            | 0.224137931 |             |           | 0.125     |
| ENSG00000166436 |            | 0.33636364 |            | 0.336363636 |             |           | 0.4360465 |
| ENSG00000166398 | 0.19161677 | 0.3597561  | 0.19161677 | 0.359756098 |             |           | 0.1802326 |
| ENSG00000232774 |            | 0.20552147 |            | 0.205521472 |             |           | 0.4879518 |
| ENSG00000153814 |            | 0.25842697 |            | 0.258426966 |             |           | 0.3636364 |
| ENSG00000160282 |            |            |            |             | 0.380952381 | 0.4411765 | 0.5       |
| ENSG00000091073 |            | 0.35882353 |            | 0.358823529 |             |           | 0.4204545 |
| ENSG00000123352 |            |            |            |             | 0.125       | 0.127907  |           |
| ENSG00000170500 |            | 0.5        |            | 0.5         |             |           | 0.4767442 |
| ENSG00000111647 | 0.3742515  | 0.22424242 | 0.3742515  | 0.224242424 | 0.071428571 |           |           |
| ENSG00000115896 |            | 0.5        |            | 0.5         |             |           | 0.4204545 |
| ENSG00000182087 |            | 0.10606061 |            | 0.106060606 |             |           |           |
| ENSG00000145555 | 0.2245509  |            | 0.2245509  |             | 0.111111111 | 0.1590909 |           |
| ENSG00000171208 |            | 0.05454545 |            | 0.054545455 |             |           |           |
| ENSG00000186642 | 0.13473054 | 0.31402439 | 0.13473054 | 0.31402439  |             |           | 0.2616279 |
| ENSG00000179314 |            | 0.43478261 |            | 0.434782609 |             |           | 0.4883721 |
| ENSG00000132664 | 0.28488372 | 0.18902439 | 0.28488372 | 0.18902439  |             |           | 0.4404762 |
| ENSG00000110315 |            | 0.48876404 |            | 0.488764045 |             |           | 0.4204545 |
| ENSG00000198961 |            | 0.46932515 |            | 0.469325153 |             | 0.0813953 | 0.3409091 |
| ENSG00000144868 | 0.23913043 | 0.46969697 | 0.23913043 | 0.46969697  | 0.452380952 | 0.4593023 | 0.4593023 |
| ENSG00000143184 |            | 0.28787879 |            | 0.287878788 |             |           | 0.2409639 |
| ENSG00000187240 | 0.44011976 | 0.32621951 | 0.44011976 | 0.326219512 | 0.321428571 | 0.3023256 | 0.4767442 |
| ENSG00000163686 |            | 0.43030303 |            | 0.43030303  |             |           | 0.2965116 |
| ENSG00000097096 |            | 0.0625     |            | 0.0625      |             |           | 0.0609756 |
| ENSG00000017797 | 0.30421687 | 0.30681818 | 0.30421687 | 0.306818182 |             | 0.0647059 | 0.4       |
| ENSG00000147113 |            | 0.48170732 |            | 0.481707317 |             |           | 0.4777778 |
| ENSG00000198734 | 0.4491018  |            | 0.4491018  |             | 0.345238095 | 0.4709302 | 0.313253  |
| ENSG00000100522 |            | 0.38095238 |            | 0.380952381 |             |           | 0.4090909 |
| ENSG00000219438 |            | 0.43030303 |            | 0.43030303  |             |           | 0.2619048 |
| ENSG00000006756 |            | 0.06134969 |            | 0.061349693 |             |           | 0.3529412 |
| ENSG00000164574 |            | 0.31288344 |            | 0.312883436 |             |           | 0.4709302 |
| ENSG00000240021 | 0.12275449 | 0.36060606 | 0.12275449 | 0.360606061 |             |           | 0.4651163 |
| ENSG00000179542 | 0.20555556 | 0.36280488 | 0.20555556 | 0.362804878 | 0.465909091 | 0.4772727 | 0.4883721 |
| ENSG00000173334 | 0.11976048 | 0.30487805 | 0.11976048 | 0.304878049 | 0.215909091 | 0.1818182 | 0.127907  |
| ENSG00000071564 |            | 0.23333333 |            | 0.233333333 |             |           | 0.4127907 |
| ENSG00000179933 |            | 0.47619048 |            | 0.476190476 |             |           | 0.4333333 |
| ENSG00000197953 |            | 0.29878049 |            | 0.298780488 |             |           | 0.4352941 |
| ENSG00000204569 |            |            |            |             |             |           | 0.0872093 |
| ENSG00000016864 | 0.10778443 | 0.33636364 | 0.10778443 | 0.336363636 | 0.476190476 | 0.5       | 0.5       |
| ENSG00000177485 |            | 0.4        |            | 0.4         |             |           | 0.5       |
| ENSG00000188000 |            | 0.31481481 |            | 0.314814815 |             |           | 0.4882353 |
| ENSG00000128604 |            |            |            |             | 0.06547619  | 0.0872093 |           |
| ENSG00000176974 | 0.13333333 | 0.3372093  | 0.13333333 | 0.337209302 | 0.222222222 | 0.2272727 | 0.0697674 |
| ENSG00000168594 | 0.20359281 |            | 0.20359281 |             | 0.078313253 |           |           |
| ENSG00000131944 | 0.28977273 | 0.12941176 | 0.28977273 | 0.129411765 | 0.369047619 | 0.2906977 | 0.0681818 |
| ENSG00000161594 | 0.24850299 |            | 0.24850299 |             | 0.222891566 | 0.122093  |           |

|                 |            |            |            |             |             |           |           |
|-----------------|------------|------------|------------|-------------|-------------|-----------|-----------|
| ENSG00000136881 |            | 0.19393939 |            | 0.193939394 |             |           | 0.2906977 |
| ENSG00000170509 |            | 0.44817073 |            | 0.448170732 |             |           | 0.372093  |
| ENSG00000103168 | 0.21686747 | 0.48484848 | 0.21686747 | 0.484848485 | 0.482142857 | 0.4777778 | 0.4825581 |
| ENSG00000167483 | 0.2739726  | 0.26969697 | 0.2739726  | 0.26969697  | 0.313253012 | 0.3176471 | 0.122093  |
| ENSG00000163684 | 0.41666667 | 0.40490798 | 0.41666667 | 0.404907975 | 0.186046512 | 0.1904762 | 0.2325581 |
| ENSG00000088833 | 0.34659091 | 0.48787879 | 0.34659091 | 0.487878788 | 0.255555556 | 0.3522727 | 0.3139535 |
| ENSG00000131914 |            | 0.48780488 |            | 0.487804878 |             |           | 0.1022727 |
| ENSG00000123124 |            |            |            |             |             |           | 0.0731707 |
| ENSG00000120500 | 0.12777778 |            | 0.12777778 |             | 0.444444444 |           | 0.3863636 |
| ENSG00000180259 | 0.5        |            | 0.5        |             | 0.30952381  |           | 0.2848837 |
| ENSG00000103811 |            | 0.30337079 |            | 0.303370787 |             |           | 0.1882353 |
| ENSG00000001629 |            | 0.45454545 |            | 0.454545455 |             |           | 0.5       |
| ENSG00000140941 | 0.37650602 | 0.14848485 | 0.37650602 | 0.148484848 |             |           | 0.4244186 |
| ENSG00000160223 |            | 0.47752809 |            | 0.47752809  |             |           | 0.4207317 |
| ENSG00000145414 | 0.21666667 | 0.25454545 | 0.21666667 | 0.254545455 | 0.233333333 |           | 0.2386364 |
| ENSG00000249160 |            | 0.44047619 |            | 0.44047619  |             |           | 0.1627907 |
| ENSG00000112394 |            | 0.44444444 |            | 0.444444444 |             |           | 0.3895349 |
| ENSG00000226757 |            |            |            |             | 0.469135802 |           | 0.4418605 |
| ENSG00000106066 | 0.31137725 |            | 0.31137725 |             |             |           |           |
| ENSG00000188603 | 0.19760479 |            | 0.19760479 |             |             |           |           |
| ENSG00000167165 | 0.43333333 | 0.22777778 | 0.43333333 | 0.227777778 | 0.233333333 | 0.1477273 | 0.1590909 |
| ENSG00000099399 |            | 0.34242424 |            | 0.342424242 |             |           | 0.0523256 |
| ENSG00000121957 | 0.13636364 | 0.36060606 | 0.13636364 | 0.360606061 |             |           | 0.494186  |
| ENSG00000160691 |            |            |            |             | 0.078313253 |           | 0.0697674 |
| ENSG00000215421 |            | 0.21515152 |            | 0.215151515 |             |           |           |
| ENSG00000146067 |            | 0.3030303  |            | 0.303030303 |             |           | 0.3488372 |
| ENSG00000171421 | 0.25748503 |            | 0.25748503 |             | 0.398809524 | 0.4709302 |           |
| ENSG00000183798 |            | 0.17575758 |            | 0.175757576 |             |           | 0.4476744 |
| ENSG00000146469 |            | 0.43030303 |            | 0.43030303  |             |           | 0.2176471 |
| ENSG00000064651 |            | 0.25555556 |            | 0.255555556 |             |           | 0.4       |
| ENSG00000148488 |            | 0.37640449 |            | 0.376404494 |             |           | 0.1777778 |
| ENSG00000251369 |            | 0.26666667 |            | 0.266666667 |             |           | 0.1162791 |
| ENSG00000185664 | 0.16666667 |            | 0.16666667 |             |             |           |           |
| ENSG00000197563 | 0.13173653 |            | 0.13173653 |             | 0.18452381  | 0.2034884 |           |
| ENSG00000196850 |            | 0.33333333 |            | 0.333333333 |             |           | 0.494186  |
| ENSG00000090487 |            | 0.46060606 |            | 0.460606061 |             |           | 0.0813953 |
| ENSG00000157554 |            | 0.42424242 |            | 0.424242424 | 0.244444444 | 0.1590909 | 0.4011628 |
| ENSG00000198814 |            | 0.22077922 |            | 0.220779221 |             |           | 0.1444444 |
| ENSG00000163041 |            | 0.31097561 |            | 0.31097561  |             |           | 0.25      |
| ENSG00000198265 |            | 0.4601227  |            | 0.460122699 |             |           | 0.3197674 |
| ENSG00000186891 |            |            |            |             |             |           | 0.1918605 |
| ENSG00000174307 |            | 0.37345679 |            | 0.37345679  |             |           | 0.3863636 |
| ENSG00000250493 | 0.11976048 | 0.3969697  | 0.11976048 | 0.396969697 |             |           | 0.4244186 |
| ENSG00000171763 | 0.24550898 |            | 0.24550898 |             | 0.15060241  | 0.1411765 |           |
| ENSG00000230657 |            | 0.16463415 |            | 0.164634146 |             |           | 0.1860465 |
| ENSG00000127445 | 0.17222222 | 0.45       | 0.17222222 | 0.45        |             |           | 0.3863636 |
| ENSG00000114248 |            | 0.37272727 |            | 0.372727273 |             |           | 0.2034884 |
| ENSG00000179598 |            | 0.40449438 |            | 0.404494382 |             |           | 0.3295455 |
| ENSG00000103067 |            | 0.10670732 |            | 0.106707317 |             |           | 0.1428571 |
| ENSG00000164068 |            | 0.46666667 |            | 0.466666667 |             |           | 0.2383721 |
| ENSG00000137760 |            | 0.27878788 |            | 0.278787879 |             |           | 0.3023256 |
| ENSG00000156170 | 0.36890244 | 0.23888889 | 0.36890244 | 0.238888889 | 0.244047619 | 0.2616279 | 0.2529412 |
| ENSG00000180354 | 0.49700599 | 0.43636364 | 0.49700599 | 0.436363636 | 0.398809524 | 0.3372093 | 0.5       |
| ENSG00000146281 |            | 0.3030303  |            | 0.303030303 |             |           | 0.2034884 |

|                 |            |            |            |             |             |           |           |
|-----------------|------------|------------|------------|-------------|-------------|-----------|-----------|
| ENSG0000010704  |            | 0.37272727 |            | 0.372727273 | 0.125       |           | 0.1511628 |
| ENSG00000141985 |            | 0.27607362 |            | 0.27607362  |             |           |           |
| ENSG00000197006 | 0.22754491 |            | 0.22754491 |             | 0.44047619  | 0.4588235 |           |
| ENSG0000011478  |            | 0.12359551 |            | 0.123595506 |             |           | 0.1555556 |
| ENSG00000136040 |            | 0.21818182 |            | 0.218181818 |             |           | 0.1860465 |
| ENSG00000188984 | 0.44827586 | 0.29090909 | 0.44827586 | 0.290909091 | 0.375       | 0.4625    | 0.255814  |
| ENSG00000143669 |            | 0.42121212 |            | 0.421212121 |             |           | 0.1104651 |
| ENSG00000171847 | 0.17045455 | 0.21428571 | 0.17045455 | 0.214285714 | 0.133333333 | 0.0909091 | 0.3409091 |
| ENSG00000163512 | 0.44207317 | 0.29090909 | 0.44207317 | 0.290909091 | 0.168674699 | 0.202381  | 0.2529412 |
| ENSG00000171444 |            | 0.47272727 |            | 0.472727273 |             |           | 0.377907  |
| ENSG00000142627 |            |            |            |             |             |           | 0.0755814 |
| ENSG00000184194 |            | 0.24390244 |            | 0.243902439 |             |           | 0.2529412 |
| ENSG00000057935 |            | 0.47126437 |            | 0.471264368 |             |           | 0.25      |
| ENSG00000116198 |            | 0.4969697  |            | 0.496969697 |             |           | 0.4767442 |
| ENSG00000112964 | 0.40419162 | 0.45454545 | 0.40419162 | 0.454545455 | 0.146341463 | 0.1190476 | 0.4186047 |
| ENSG00000150627 |            | 0.24848485 |            | 0.248484848 |             |           | 0.3117647 |
| ENSG00000099804 |            | 0.37974684 |            | 0.379746835 |             |           | 0.4634146 |
| ENSG00000137808 |            |            |            |             |             |           | 0.2034884 |
| ENSG00000001617 |            |            |            |             | 0.345238095 | 0.494186  |           |
| ENSG00000259030 |            | 0.32222222 |            | 0.322222222 |             |           | 0.3197674 |
| ENSG00000124257 | 0.14371257 | 0.41158537 | 0.14371257 | 0.411585366 | 0.482142857 | 0.4534884 | 0.2764706 |
| ENSG00000139436 |            | 0.26666667 |            | 0.266666667 |             |           | 0.3081395 |
| ENSG00000177596 | 0.17964072 | 0.33636364 | 0.17964072 | 0.336363636 | 0.148809524 | 0.2034884 | 0.4011628 |
| ENSG00000125691 |            | 0.47878788 |            | 0.478787879 |             |           | 0.4825581 |
| ENSG00000082996 |            | 0.27878788 |            | 0.278787879 | 0.398809524 | 0.3488372 | 0.1686047 |
| ENSG00000110887 |            | 0.26060606 |            | 0.260606061 |             |           | 0.494186  |
| ENSG00000135426 | 0.43975904 | 0.32121212 | 0.43975904 | 0.321212121 | 0.089285714 | 0.1162791 | 0.3837209 |
| ENSG00000124693 |            | 0.35582822 |            | 0.355828221 |             |           | 0.1104651 |
| ENSG00000108474 |            | 0.47272727 |            | 0.472727273 |             |           | 0.0930233 |
| ENSG00000168826 | 0.19879518 | 0.22727273 | 0.19879518 | 0.227272727 | 0.345238095 | 0.3588235 | 0.3588235 |
| ENSG00000138400 | 0.2994012  | 0.1097561  | 0.2994012  | 0.109756098 |             | 0.0581395 | 0.4825581 |
| ENSG00000065665 | 0.13580247 | 0.47575758 | 0.13580247 | 0.475757576 |             | 0.4880952 | 0.4659091 |
| ENSG00000067221 |            | 0.2347561  |            | 0.234756098 |             |           | 0.3604651 |
| ENSG00000177830 |            | 0.49695122 |            | 0.49695122  |             |           | 0.2678571 |
| ENSG00000050344 | 0.17045455 |            | 0.17045455 |             |             |           | 0.0872093 |
| ENSG00000115593 | 0.24545455 | 0.29393939 | 0.24545455 | 0.293939394 | 0.077777778 | 0.0777778 | 0.4709302 |
| ENSG00000171004 |            | 0.27300613 |            | 0.273006135 |             |           | 0.3117647 |
| ENSG00000124772 |            | 0.46036585 |            | 0.460365854 |             |           | 0.4821429 |
| ENSG00000145545 |            | 0.46060606 |            | 0.460606061 |             |           | 0.3139535 |
| ENSG00000166037 |            | 0.49079755 |            | 0.490797546 |             |           | 0.4285714 |
| ENSG00000114098 |            | 0.09393939 |            | 0.093939394 |             |           |           |
| ENSG00000115368 |            | 0.33333333 |            | 0.333333333 |             |           | 0.3662791 |
| ENSG00000049246 | 0.09202454 |            | 0.09202454 |             | 0.291666667 | 0.2352941 |           |
| ENSG00000117593 | 0.13772455 |            | 0.13772455 |             |             |           |           |
| ENSG00000165175 |            |            |            |             | 0.375       | 0.4883721 |           |
| ENSG00000162843 |            | 0.42777778 |            | 0.427777778 |             |           | 0.4204545 |
| ENSG00000254986 | 0.41017964 | 0.24444444 | 0.41017964 | 0.244444444 | 0.285714286 | 0.4939024 | 0.1931818 |
| ENSG00000023228 |            | 0.39090909 |            | 0.390909091 |             |           | 0.2159091 |
| ENSG00000108654 |            | 0.06111111 |            | 0.061111111 | 0.339285714 | 0.3139535 |           |
| ENSG00000068024 | 0.33433735 | 0.43333333 | 0.33433735 | 0.433333333 | 0.410714286 | 0.3430233 | 0.4294118 |
| ENSG00000163519 | 0.09580838 | 0.48787879 | 0.09580838 | 0.487878788 |             |           | 0.122093  |
| ENSG00000164414 | 0.17777778 | 0.47222222 | 0.17777778 | 0.472222222 | 0.466666667 | 0.4888889 | 0.4940476 |
| ENSG00000183273 | 0.2005988  | 0.33030303 | 0.2005988  | 0.33030303  | 0.398809524 | 0.4360465 | 0.1918605 |
| ENSG00000110422 |            | 0.37878788 |            | 0.378787879 |             |           | 0.3988095 |

|                |            |            |            |             |             |           |           |
|----------------|------------|------------|------------|-------------|-------------|-----------|-----------|
| ENSG0000087470 | 0.16766467 | 0.16060606 | 0.16766467 | 0.160606061 | 0.053571429 |           | 0.0731707 |
| ENSG0000105928 | 0.2        | 0.14848485 | 0.2        | 0.148484848 | 0.476190476 | 0.4651163 | 0.2209302 |
| ENSG0000115289 |            |            |            |             | 0.154761905 | 0.1764706 |           |
| ENSG0000143845 | 0.11627907 |            | 0.11627907 |             |             |           |           |
| ENSG0000100030 |            | 0.5        |            | 0.5         |             |           | 0.377907  |
| ENSG0000064393 |            | 0.33333333 |            | 0.33333333  |             |           | 0.2093023 |
| ENSG0000141376 |            | 0.07575758 |            | 0.075757576 |             |           |           |
| ENSG0000102854 |            | 0.19767442 |            | 0.197674419 |             |           | 0.2954545 |
| ENSG0000137177 |            | 0.45555556 |            | 0.455555556 |             |           | 0.2848837 |
| ENSG0000174501 |            | 0.3030303  |            | 0.303030303 |             |           | 0.3837209 |
| ENSG0000136653 |            | 0.46551724 |            | 0.465517241 |             |           | 0.4545455 |
| ENSG0000204482 |            | 0.26060606 |            | 0.260606061 |             |           | 0.2674419 |
| ENSG0000213689 |            |            |            |             | 0.06626506  |           |           |
| ENSG0000137216 |            | 0.08787879 |            | 0.087878788 |             |           | 0.2674419 |
| ENSG0000163975 |            | 0.31288344 |            | 0.312883436 |             |           | 0.1117647 |
| ENSG0000088727 | 0.23652695 |            | 0.23652695 |             | 0.464285714 | 0.4244186 | 0.1337209 |
| ENSG0000164934 |            | 0.21818182 |            | 0.218181818 |             |           | 0.3488372 |
| ENSG0000204410 | 0.26946108 | 0.27575758 | 0.26946108 | 0.275757576 | 0.172619048 | 0.3430233 | 0.4470588 |
| ENSG0000105519 |            | 0.3        |            | 0.3         |             |           | 0.2093023 |
| ENSG0000159588 |            | 0.32317073 |            | 0.323170732 |             |           | 0.3604651 |
| ENSG0000112110 |            | 0.47272727 |            | 0.472727273 |             |           | 0.1802326 |
| ENSG0000189023 | 0.26666667 | 0.43865031 | 0.26666667 | 0.438650307 |             |           | 0.2267442 |
| ENSG0000180881 | 0.18263473 | 0.27743902 | 0.18263473 | 0.277439024 | 0.19047619  | 0.1647059 | 0.1647059 |
| ENSG0000112242 |            | 0.25       |            | 0.25        |             |           | 0.2195122 |
| ENSG0000113300 |            | 0.19207317 |            | 0.192073171 |             |           | 0.0872093 |
| ENSG0000153147 |            | 0.48787879 |            | 0.487878788 |             |           | 0.4777778 |
| ENSG0000120341 | 0.40718563 | 0.35454545 | 0.40718563 | 0.354545455 | 0.404761905 | 0.4011628 | 0.4       |
| ENSG0000150054 | 0.11875    | 0.06097561 | 0.11875    | 0.06097561  | 0.420454545 | 0.4302326 | 0.4476744 |
| ENSG0000238227 |            | 0.08888889 |            | 0.088888889 |             |           |           |
| ENSG0000136754 |            | 0.17777778 |            | 0.177777778 |             |           |           |
| ENSG0000140450 |            | 0.36060606 |            | 0.360606061 |             |           | 0.2383721 |
| ENSG0000198839 |            | 0.0625     |            | 0.0625      |             |           |           |
| ENSG0000067840 |            | 0.08333333 |            | 0.083333333 |             |           | 0.1931818 |
| ENSG0000143442 |            |            |            |             |             |           | 0.2882353 |
| ENSG0000176293 | 0.36227545 | 0.4        | 0.36227545 | 0.4         | 0.452380952 | 0.4186047 | 0.3777778 |
| ENSG0000164327 |            | 0.39939024 |            | 0.399390244 |             |           | 0.5       |
| ENSG0000204956 |            | 0.20224719 |            | 0.202247191 |             |           | 0.1477273 |
| ENSG0000100580 |            | 0.47752809 |            | 0.47752809  |             |           | 0.452381  |
| ENSG0000205659 | 0.39520958 | 0.2        | 0.39520958 | 0.2         | 0.222222222 | 0.2954545 | 0.3197674 |
| ENSG0000135248 |            | 0.47222222 |            | 0.472222222 | 0.297619048 | 0.3081395 | 0.4545455 |
| ENSG0000121380 | 0.11746988 | 0.26060606 | 0.11746988 | 0.260606061 | 0.375       | 0.3111111 | 0.3662791 |
| ENSG0000160801 |            | 0.36666667 |            | 0.366666667 |             |           | 0.4476744 |
| ENSG0000182827 |            | 0.20606061 |            | 0.206060606 |             |           | 0.0823529 |
| ENSG0000132912 | 0.31137725 |            | 0.31137725 |             | 0.291666667 | 0.2034884 | 0.0988372 |
| ENSG0000084070 |            |            |            |             | 0.061728395 |           |           |
| ENSG0000134640 |            | 0.48181818 |            | 0.481818182 |             |           | 0.3372093 |
| ENSG0000112249 | 0.3988764  | 0.48181818 | 0.3988764  | 0.481818182 | 0.25        | 0.2840909 | 0.4534884 |
| ENSG0000125245 | 0.0508982  |            | 0.0508982  |             |             |           |           |
| ENSG0000099994 |            | 0.2030303  |            | 0.203030303 |             |           | 0.4593023 |
| ENSG0000143819 |            | 0.08841463 |            | 0.088414634 |             |           | 0.0697674 |
| ENSG0000175416 |            | 0.30434783 |            | 0.304347826 |             |           | 0.3176471 |
| ENSG0000175591 | 0.2754491  |            | 0.2754491  |             |             |           |           |
| ENSG0000083814 |            | 0.43030303 |            | 0.43030303  |             |           | 0.25      |
| ENSG0000110921 | 0.49700599 | 0.20606061 | 0.49700599 | 0.206060606 | 0.166666667 | 0.1686047 | 0.127907  |



|                 |            |            |            |             |             |           |           |
|-----------------|------------|------------|------------|-------------|-------------|-----------|-----------|
| ENSG00000130032 | 0.26111111 | 0.3969697  | 0.26111111 | 0.396969697 | 0.177777778 | 0.125     | 0.4476744 |
| ENSG00000177971 | 0.44409938 |            | 0.44409938 |             | 0.233333333 | 0.4767442 |           |
| ENSG00000166887 |            | 0.1        |            | 0.1         |             |           | 0.1744186 |
| ENSG00000111581 | 0.26047904 | 0.25316456 | 0.26047904 | 0.253164557 | 0.322222222 | 0.2888889 |           |
| ENSG00000172139 |            | 0.33939394 |            | 0.339393939 |             |           | 0.4825581 |
| ENSG00000112486 | 0.41017964 | 0.15454545 | 0.41017964 | 0.154545455 | 0.4         | 0.4659091 |           |
| ENSG00000124224 | 0.23939394 | 0.48484848 | 0.23939394 | 0.484848485 | 0.494047619 | 0.377907  | 0.4767442 |
| ENSG00000258256 |            | 0.34269663 |            | 0.342696629 |             |           | 0.3888889 |
| ENSG00000130311 |            | 0.31402439 |            | 0.31402439  |             |           | 0.2613636 |
| ENSG00000158417 |            | 0.4        |            | 0.4         |             |           | 0.2840909 |
| ENSG00000117650 |            | 0.21341463 |            | 0.213414634 |             |           | 0.5       |
| ENSG00000057019 |            | 0.42424242 |            | 0.424242424 |             |           | 0.2906977 |
| ENSG00000197977 |            | 0.48181818 |            | 0.481818182 |             |           | 0.255814  |
| ENSG00000124019 | 0.18562874 | 0.18181818 | 0.18562874 | 0.181818182 |             |           | 0.2848837 |
| ENSG00000114054 |            | 0.26666667 |            | 0.266666667 |             |           | 0.1931818 |
| ENSG00000117362 |            | 0.17272727 |            | 0.172727273 | 0.297619048 | 0.3255814 |           |
| ENSG00000118231 |            |            |            |             |             |           | 0.4186047 |
| ENSG00000071655 |            | 0.34090909 |            | 0.340909091 |             |           | 0.4666667 |
| ENSG00000025423 | 0.19760479 |            | 0.19760479 |             | 0.267857143 | 0.2209302 |           |
| ENSG00000162594 | 0.47904192 | 0.30606061 | 0.47904192 | 0.306060606 | 0.369047619 | 0.377907  | 0.3255814 |
| ENSG00000138185 |            | 0.47878788 |            | 0.478787879 |             |           | 0.3452381 |
| ENSG00000166145 |            | 0.16666667 |            | 0.166666667 |             |           | 0.2529412 |
| ENSG00000139624 | 0.30722892 | 0.42424242 | 0.30722892 | 0.424242424 | 0.297619048 | 0.244186  | 0.2439024 |
| ENSG00000082293 |            | 0.49068323 |            | 0.49068323  |             |           | 0.3895349 |
| ENSG00000096717 |            | 0.09872611 |            | 0.098726115 |             |           | 0.3604651 |
| ENSG00000087116 |            | 0.41818182 |            | 0.418181818 |             |           | 0.4709302 |
| ENSG00000157326 | 0.27011494 |            | 0.27011494 |             |             |           |           |
| ENSG00000161813 |            | 0.0617284  |            | 0.061728395 |             |           | 0.4418605 |
| ENSG00000004939 |            | 0.27272727 |            | 0.272727273 |             |           | 0.4127907 |
| ENSG00000127054 |            | 0.18484848 |            | 0.184848485 |             |           |           |
| ENSG00000112782 |            | 0.40449438 |            | 0.404494382 |             |           | 0.4333333 |
| ENSG00000152404 |            | 0.47575758 |            | 0.475757576 | 0.154761905 | 0.0872093 | 0.4069767 |
| ENSG00000090060 |            | 0.21515152 |            | 0.215151515 |             |           | 0.1235294 |
| ENSG00000151208 |            | 0.37878788 |            | 0.378787879 |             |           | 0.4883721 |
| ENSG00000155087 | 0.43113772 |            | 0.43113772 |             | 0.363095238 | 0.3255814 |           |
| ENSG00000105737 |            | 0.06666667 |            | 0.066666667 |             |           | 0.0755814 |
| ENSG00000162623 |            | 0.24242424 |            | 0.242424242 |             |           | 0.3554217 |
| ENSG00000175879 |            |            |            |             | 0.089285714 | 0.1104651 |           |
| ENSG00000131044 |            | 0.43939394 |            | 0.439393939 |             |           | 0.1162791 |
| ENSG00000105171 |            | 0.41818182 |            | 0.418181818 |             |           | 0.4222222 |
| ENSG00000119414 | 0.48255814 | 0.48888889 | 0.48255814 | 0.488888889 | 0.43902439  | 0.5       | 0.5       |
| ENSG00000142178 |            | 0.34482759 |            | 0.344827586 |             |           | 0.3522727 |
| ENSG00000181143 |            | 0.11111111 |            | 0.111111111 |             |           | 0.1022727 |
| ENSG00000181004 |            | 0.36666667 |            | 0.366666667 |             |           | 0.3522727 |
| ENSG00000180914 |            | 0.375      |            | 0.375       |             |           | 0.0930233 |
| ENSG00000096395 | 0.20958084 |            | 0.20958084 |             | 0.083333333 | 0.1511628 |           |
| ENSG00000142082 | 0.07185629 | 0.27575758 | 0.07185629 | 0.275757576 | 0.142857143 | 0.1705882 | 0.2888889 |
| ENSG00000170807 | 0.14071856 | 0.48837209 | 0.14071856 | 0.488372093 | 0.166666667 | 0.1569767 | 0.4127907 |
| ENSG00000123933 |            | 0.17777778 |            | 0.177777778 |             |           | 0.3081395 |
| ENSG00000163584 |            | 0.16111111 |            | 0.161111111 |             |           | 0.3295455 |
| ENSG00000132622 |            | 0.3375     |            | 0.3375      |             |           | 0.1976744 |
| ENSG00000223865 |            | 0.32386364 |            | 0.323863636 |             |           | 0.4476744 |
| ENSG00000183044 | 0.41616766 | 0.5        | 0.41616766 | 0.5         | 0.455555556 | 0.3554217 | 0.494186  |
| ENSG00000139053 | 0.14071856 |            | 0.14071856 |             | 0.083333333 | 0.127907  | 0.0639535 |

|                 |            |            |            |             |             |           |           |
|-----------------|------------|------------|------------|-------------|-------------|-----------|-----------|
| ENSG00000172046 | 0.46107784 | 0.36666667 | 0.46107784 | 0.366666667 | 0.06547619  | 0.0872093 | 0.0882353 |
| ENSG00000153234 |            | 0.48484848 |            | 0.484848485 | 0.144444444 | 0.1363636 | 0.2093023 |
| ENSG00000082482 |            | 0.21022727 |            | 0.210227273 |             |           | 0.2727273 |
| ENSG00000176273 |            | 0.46363636 |            | 0.463636364 |             |           | 0.122093  |
| ENSG00000163701 |            | 0.46969697 |            | 0.46969697  |             |           |           |
| ENSG00000122042 | 0.30538922 | 0.26363636 | 0.30538922 | 0.263636364 |             | 0.1235294 | 0.3647059 |
| ENSG00000183638 |            | 0.38787879 |            | 0.387878788 | 0.155555556 | 0.1022727 | 0.4825581 |
| ENSG00000122194 | 0.46666667 | 0.26060606 | 0.46666667 | 0.260606061 | 0.4         | 0.4318182 | 0.4476744 |
| ENSG00000173805 |            | 0.11212121 |            | 0.112121212 |             |           | 0.122093  |
| ENSG00000157782 | 0.49101796 |            | 0.49101796 |             | 0.267857143 | 0.1941176 |           |
| ENSG00000170909 |            |            |            |             | 0.462962963 | 0.4772727 |           |
| ENSG00000175455 | 0.32934132 | 0.35454545 | 0.32934132 | 0.354545455 | 0.5         | 0.4764706 | 0.1395349 |
| ENSG00000075651 |            | 0.38484848 |            | 0.384848485 |             |           | 0.3488372 |
| ENSG00000115998 | 0.31736527 |            | 0.31736527 |             | 0.130952381 | 0.1627907 |           |
| ENSG00000123892 | 0.16564417 | 0.43030303 | 0.16564417 | 0.43030303  | 0.156626506 | 0.2034884 | 0.3882353 |
| ENSG00000127995 |            | 0.40909091 |            | 0.409090909 |             |           | 0.2034884 |
| ENSG00000170310 |            | 0.36666667 |            | 0.366666667 |             |           | 0.126506  |
| ENSG00000138674 | 0.31818182 | 0.24545455 | 0.31818182 | 0.245454545 | 0.422222222 | 0.4431818 | 0.4709302 |
| ENSG00000135341 | 0.31097561 | 0.38764045 | 0.31097561 | 0.387640449 | 0.384146341 | 0.4186047 | 0.3783784 |
| ENSG00000100744 | 0.05988024 | 0.46363636 | 0.05988024 | 0.463636364 | 0.416666667 | 0.4534884 | 0.1860465 |
| ENSG00000132740 | 0.07185629 | 0.33116883 | 0.07185629 | 0.331168831 |             |           |           |
| ENSG00000102531 |            | 0.06363636 |            | 0.063636364 |             |           | 0.0523256 |
| ENSG00000134207 |            | 0.47575758 |            | 0.475757576 |             |           | 0.4941176 |
| ENSG00000013016 |            | 0.22352941 |            | 0.223529412 |             |           | 0.1395349 |
| ENSG00000163092 |            | 0.12068966 |            | 0.120689655 | 0.071428571 |           | 0.2678571 |
| ENSG00000145945 |            | 0.47222222 |            | 0.472222222 |             |           | 0.2738095 |
| ENSG00000162572 |            |            |            |             |             |           | 0.1931818 |
| ENSG00000074527 |            | 0.46363636 |            | 0.463636364 |             |           | 0.494186  |
| ENSG00000103264 |            | 0.44512195 |            | 0.445121951 |             |           | 0.25      |
| ENSG00000198133 |            | 0.49090909 |            | 0.490909091 |             |           | 0.3058824 |
| ENSG00000162641 | 0.46706587 | 0.35151515 | 0.46706587 | 0.351515152 |             | 0.0581395 | 0.3647059 |
| ENSG00000196517 |            | 0.09444444 |            | 0.094444444 |             |           | 0.2727273 |
| ENSG00000171914 | 0.05681818 | 0.16463415 | 0.05681818 | 0.164634146 |             |           | 0.2294118 |
| ENSG00000142609 |            | 0.12222222 |            | 0.122222222 |             |           | 0.1136364 |
| ENSG00000020129 |            |            |            |             |             |           | 0.1802326 |
| ENSG00000196754 | 0.36526946 | 0.07272727 | 0.36526946 | 0.072727273 |             |           |           |
| ENSG00000174370 |            | 0.44135802 |            | 0.441358025 |             |           | 0.3941176 |
| ENSG00000151498 |            | 0.08235294 |            | 0.082352941 |             |           |           |
| ENSG00000204839 |            | 0.26708075 |            | 0.267080745 |             |           |           |
| ENSG00000134258 |            | 0.30555556 |            | 0.305555556 | 0.259036145 | 0.2906977 | 0.1104651 |
| ENSG00000077097 | 0.4939759  |            | 0.4939759  |             | 0.303571429 | 0.3953488 |           |
| ENSG00000166359 |            | 0.1011236  |            | 0.101123596 |             |           | 0.3444444 |
| ENSG00000105246 |            | 0.28488372 |            | 0.284883721 |             |           | 0.3604651 |
| ENSG00000155097 | 0.32934132 | 0.28484848 | 0.32934132 | 0.284848485 |             |           | 0.4204545 |
| ENSG00000139537 | 0.07185629 | 0.33636364 | 0.07185629 | 0.336363636 | 0.44047619  | 0.4651163 | 0.4651163 |
| ENSG00000179388 |            | 0.46296296 |            | 0.462962963 |             |           | 0.452381  |
| ENSG00000157349 | 0.27245509 | 0.10909091 | 0.27245509 | 0.109090909 |             |           | 0.127907  |
| ENSG00000137575 | 0.33333333 |            | 0.33333333 |             | 0.433333333 | 0.375     | 0.3953488 |
| ENSG00000100554 | 0.41017964 |            | 0.41017964 |             | 0.357142857 | 0.5       | 0.4940476 |
| ENSG00000255767 |            | 0.4        |            | 0.4         |             |           | 0.3111111 |
| ENSG00000197134 | 0.4494382  | 0.40797546 | 0.4494382  | 0.40797546  | 0.344444444 | 0.4761905 | 0.3235294 |
| ENSG00000125388 |            | 0.37222222 |            | 0.372222222 |             |           | 0.0795455 |
| ENSG00000181350 |            | 0.36060606 |            | 0.360606061 |             |           | 0.3023256 |
| ENSG00000109171 |            | 0.34337349 |            | 0.343373494 |             |           | 0.4545455 |

|                 |            |            |            |             |             |           |           |
|-----------------|------------|------------|------------|-------------|-------------|-----------|-----------|
| ENSG00000204290 | 0.14670659 | 0.47272727 | 0.14670659 | 0.472727273 | 0.202380952 | 0.1802326 | 0.4880952 |
| ENSG00000137801 | 0.2005988  | 0.14545455 | 0.2005988  | 0.145454545 | 0.331325301 | 0.4476744 | 0.4011628 |
| ENSG00000132932 | 0.36227545 | 0.49393939 | 0.36227545 | 0.493939394 | 0.077380952 | 0.1744186 | 0.4764706 |
| ENSG00000148175 |            | 0.3        |            | 0.3         |             |           | 0.3068182 |
| ENSG00000198574 |            | 0.34242424 |            | 0.342424242 |             |           | 0.4352941 |
| ENSG00000123213 |            | 0.27743902 |            | 0.277439024 |             |           | 0.4879518 |
| ENSG00000145526 | 0.21556886 |            | 0.21556886 |             |             |           |           |
| ENSG00000186407 | 0.3908046  | 0.3006135  | 0.3908046  | 0.300613497 | 0.25        | 0.3222222 | 0.125     |
| ENSG00000055147 | 0.44311377 | 0.38333333 | 0.44311377 | 0.383333333 | 0.148809524 | 0.1511628 | 0.1555556 |
| ENSG00000173281 |            | 0.28888889 |            | 0.288888889 |             |           | 0.3313953 |
| ENSG00000175279 |            | 0.42675159 |            | 0.426751592 |             |           | 0.4117647 |
| ENSG00000204520 | 0.48863636 | 0.40740741 | 0.48863636 | 0.407407407 | 0.295454545 | 0.3222222 | 0.2804878 |
| ENSG00000150201 | 0.3742515  |            | 0.3742515  |             | 0.415662651 | 0.4294118 |           |
| ENSG00000103591 | 0.33532934 | 0.49090909 | 0.33532934 | 0.490909091 | 0.119047619 | 0.1802326 | 0.4651163 |
| ENSG00000174136 |            | 0.29090909 |            | 0.290909091 |             |           | 0.2906977 |
| ENSG00000197140 |            | 0.2652439  |            | 0.265243902 |             |           | 0.2732558 |
| ENSG00000133731 | 0.45757576 | 0.40606061 | 0.45757576 | 0.406060606 | 0.296296296 | 0.2470588 | 0.3823529 |
| ENSG00000154678 |            | 0.40909091 |            | 0.409090909 |             |           | 0.4186047 |
| ENSG00000178084 |            | 0.43636364 |            | 0.436363636 |             |           | 0.2058824 |
| ENSG00000036054 |            | 0.36969697 |            | 0.36969697  |             |           | 0.0523256 |
| ENSG00000182240 |            | 0.47878788 |            | 0.478787879 |             |           | 0.3372093 |
| ENSG00000149177 |            | 0.44848485 |            | 0.448484848 |             |           | 0.4360465 |
| ENSG00000106404 | 0.4011976  | 0.25304878 | 0.4011976  | 0.25304878  | 0.196428571 | 0.1453488 | 0.1453488 |
| ENSG00000075290 | 0.16167665 | 0.21818182 | 0.16167665 | 0.218181818 | 0.142857143 | 0.1918605 | 0.1918605 |
| ENSG00000166938 |            | 0.36060606 |            | 0.360606061 |             |           | 0.246988  |
| ENSG00000173264 | 0.15151515 |            | 0.15151515 |             | 0.166666667 | 0.2151163 |           |
| ENSG00000075388 |            | 0.26060606 |            | 0.260606061 |             |           | 0.2848837 |
| ENSG00000082929 | 0.27777778 | 0.25757576 | 0.27777778 | 0.257575758 | 0.322222222 | 0.3666667 | 0.127907  |
| ENSG00000259471 |            | 0.17791411 |            | 0.17791411  |             |           | 0.2093023 |
| ENSG00000162618 |            | 0.31034483 |            | 0.310344828 |             |           | 0.2840909 |
| ENSG00000159216 |            | 0.06969697 |            | 0.06969697  |             |           |           |
| ENSG00000099282 |            | 0.38484848 |            | 0.384848485 |             |           | 0.1428571 |
| ENSG00000254901 |            | 0.44545455 |            | 0.445454545 |             |           | 0.4244186 |
| ENSG00000174225 |            | 0.16060606 |            | 0.160606061 |             |           |           |
| ENSG00000110200 | 0.19161677 |            | 0.19161677 |             | 0.303571429 | 0.2       |           |
| ENSG00000171298 |            | 0.35151515 |            | 0.351515152 |             |           | 0.1627907 |
| ENSG00000117245 |            | 0.22327044 |            | 0.22327044  | 0.261904762 | 0.3975904 | 0.0588235 |
| ENSG00000129084 | 0.34545455 |            | 0.34545455 |             | 0.341463415 | 0.3546512 |           |
| ENSG00000111530 | 0.06626506 | 0.41515152 | 0.06626506 | 0.415151515 | 0.488095238 | 0.3255814 | 0.3444444 |
| ENSG00000178234 | 0.47891566 |            | 0.47891566 |             | 0.154761905 | 0.1686047 | 0.1802326 |
| ENSG00000169213 |            | 0.37804878 |            | 0.37804878  |             |           | 0.1046512 |
| ENSG00000175352 |            | 0.48181818 |            | 0.481818182 |             |           | 0.4069767 |
| ENSG00000185565 |            | 0.41358025 |            | 0.413580247 |             |           | 0.3662791 |
| ENSG00000149596 | 0.48295455 | 0.48888889 | 0.48295455 | 0.488888889 | 0.422222222 | 0.375     | 0.4825581 |
| ENSG00000124749 | 0.35555556 | 0.40606061 | 0.35555556 | 0.406060606 | 0.066666667 | 0.1555556 | 0.2267442 |
| ENSG00000121764 |            | 0.33146067 |            | 0.331460674 |             |           | 0.3111111 |
| ENSG00000143553 |            | 0.48181818 |            | 0.481818182 |             |           | 0.3081395 |
| ENSG00000107938 |            | 0.11349693 |            | 0.113496933 |             |           | 0.2235294 |
| ENSG00000237353 |            | 0.13636364 |            | 0.136363636 |             |           | 0.2888889 |
| ENSG00000092929 | 0.13483146 | 0.06666667 | 0.13483146 | 0.066666667 |             | 0.0795455 |           |
| ENSG00000206535 | 0.47727273 | 0.42424242 | 0.47727273 | 0.424242424 | 0.433333333 | 0.3977273 | 0.3604651 |
| ENSG00000171408 |            |            |            |             |             |           | 0.2267442 |
| ENSG00000122694 |            | 0.30606061 |            | 0.306060606 |             |           | 0.3863636 |
| ENSG00000067334 |            | 0.34848485 |            | 0.348484848 | 0.398809524 | 0.4418605 | 0.4418605 |

|                |            |            |            |             |             |           |           |
|----------------|------------|------------|------------|-------------|-------------|-----------|-----------|
| ENSG0000075035 | 0.28614458 | 0.46666667 | 0.28614458 | 0.46666667  | 0.089285714 | 0.1046512 | 0.4709302 |
| ENSG0000140543 |            | 0.41818182 |            | 0.418181818 |             |           | 0.4651163 |
| ENSG0000151650 |            | 0.0969697  |            | 0.096969697 |             |           | 0.0813953 |
| ENSG0000174695 |            | 0.48181818 |            | 0.481818182 |             |           | 0.2732558 |
| ENSG0000140563 | 0.35555556 | 0.48876404 | 0.35555556 | 0.488764045 | 0.277777778 | 0.3409091 | 0.3409091 |
| ENSG0000163608 |            | 0.17777778 |            | 0.177777778 |             |           | 0.4090909 |
| ENSG0000138061 | 0.16467066 | 0.46969697 | 0.16467066 | 0.46969697  |             |           | 0.1162791 |
| ENSG0000222028 |            | 0.40909091 |            | 0.409090909 |             |           | 0.1627907 |
| ENSG0000131100 | 0.26204819 |            | 0.26204819 |             | 0.196428571 | 0.25      |           |
| ENSG0000071082 | 0.42222222 | 0.3        | 0.42222222 | 0.3         | 0.181818182 | 0.1666667 | 0.1888889 |
| ENSG0000198700 |            | 0.35454545 |            | 0.354545455 |             |           | 0.202381  |
| ENSG0000038219 |            | 0.34848485 |            | 0.348484848 |             |           | 0.0581395 |
| ENSG0000164970 |            | 0.4695122  |            | 0.469512195 |             |           | 0.4825581 |
| ENSG0000198807 | 0.41916168 | 0.47777778 | 0.41916168 | 0.477777778 | 0.345238095 | 0.2848837 | 0.4318182 |
| ENSG0000169359 | 0.45783133 |            | 0.45783133 |             | 0.481927711 | 0.3764706 | 0.0872093 |
| ENSG0000189377 | 0.15662651 |            | 0.15662651 |             | 0.06547619  | 0.0581395 |           |
| ENSG0000120137 |            | 0.34848485 |            | 0.348484848 |             |           | 0.4375    |
| ENSG0000110665 |            | 0.40909091 |            | 0.409090909 |             |           | 0.2797619 |
| ENSG0000198326 |            | 0.08181818 |            | 0.081818182 | 0.285714286 | 0.372093  | 0.1569767 |
| ENSG0000109065 |            | 0.49425287 |            | 0.494252874 |             |           | 0.2325581 |
| ENSG0000085760 | 0.43413174 |            | 0.43413174 |             | 0.291666667 | 0.2965116 |           |
| ENSG0000049130 | 0.11235955 | 0.18787879 | 0.11235955 | 0.187878788 |             |           | 0.4772727 |
| ENSG0000099194 |            | 0.35151515 |            | 0.351515152 |             |           | 0.3837209 |
| ENSG0000112799 | 0.18333333 |            | 0.18333333 |             | 0.1         | 0.2111111 |           |
| ENSG0000168071 | 0.31137725 | 0.47865854 | 0.31137725 | 0.478658537 | 0.386904762 | 0.4767442 | 0.2209302 |
| ENSG0000183527 |            | 0.43820225 |            | 0.438202247 |             |           | 0.4767442 |
| ENSG0000085415 |            | 0.45151515 |            | 0.451515152 |             |           | 0.2151163 |
| ENSG0000142973 | 0.1257485  | 0.15757576 | 0.1257485  | 0.157575758 | 0.210843373 | 0.3294118 | 0.377907  |
| ENSG0000151835 | 0.12576687 | 0.44242424 | 0.12576687 | 0.442424242 | 0.445783133 | 0.4186047 | 0.4534884 |
| ENSG0000173876 |            | 0.39655172 |            | 0.396551724 |             |           | 0.2       |
| ENSG0000170606 |            | 0.26136364 |            | 0.261363636 |             |           | 0.0697674 |
| ENSG0000146072 | 0.23353293 | 0.1        | 0.23353293 | 0.1         | 0.386904762 | 0.4302326 |           |
| ENSG0000165124 |            | 0.49444444 |            | 0.494444444 |             |           | 0.4204545 |
| ENSG0000169621 |            | 0.084375   |            | 0.084375    |             |           |           |
| ENSG0000182326 | 0.1497006  | 0.07272727 | 0.1497006  | 0.072727273 | 0.101190476 | 0.0697674 | 0.0705882 |
| ENSG0000160613 | 0.17365269 | 0.375      | 0.17365269 | 0.375       | 0.273809524 | 0.2965116 | 0.3837209 |
| ENSG0000158445 |            | 0.27272727 |            | 0.272727273 |             |           | 0.3255814 |
| ENSG0000168631 | 0.11212121 | 0.32424242 | 0.11212121 | 0.324242424 | 0.266666667 | 0.25      | 0.494186  |
| ENSG0000166086 |            | 0.5        |            | 0.5         |             |           | 0.4767442 |
| ENSG0000176595 | 0.47005988 | 0.30909091 | 0.47005988 | 0.309090909 | 0.279761905 | 0.2616279 |           |
| ENSG0000179134 |            | 0.15151515 |            | 0.151515152 |             |           | 0.1511628 |
| ENSG0000114127 |            | 0.39393939 |            | 0.393939394 |             |           | 0.3372093 |
| ENSG0000168806 |            | 0.2347561  |            | 0.234756098 |             |           |           |
| ENSG0000175087 |            | 0.21818182 |            | 0.218181818 |             |           |           |
| ENSG0000157617 |            | 0.38414634 |            | 0.384146341 |             |           | 0.4418605 |
| ENSG0000146205 |            | 0.26969697 |            | 0.26969697  |             |           | 0.2267442 |
| ENSG0000198711 |            | 0.43030303 |            | 0.43030303  |             |           | 0.2325581 |
| ENSG0000169155 | 0.44252874 |            | 0.44252874 |             | 0.051282051 |           | 0.3430233 |
| ENSG0000149635 |            | 0.08484848 |            | 0.084848485 |             |           | 0.0813953 |
| ENSG0000121742 | 0.12275449 | 0.19393939 | 0.12275449 | 0.193939394 |             |           | 0.297619  |
| ENSG0000104341 |            | 0.38109756 |            | 0.381097561 |             |           | 0.4534884 |
| ENSG0000244274 |            | 0.23939394 |            | 0.239393939 |             |           | 0.4107143 |
| ENSG0000130675 | 0.33832335 |            | 0.33832335 |             |             |           |           |
| ENSG0000105325 |            | 0.27134146 |            | 0.271341463 |             |           | 0.1744186 |

|                 |            |            |            |             |             |  |           |           |
|-----------------|------------|------------|------------|-------------|-------------|--|-----------|-----------|
| ENSG00000140577 |            | 0.21818182 |            | 0.218181818 |             |  |           | 0.3139535 |
| ENSG00000060762 | 0.14545455 | 0.44545455 | 0.14545455 | 0.445454545 |             |  |           | 0.4127907 |
| ENSG00000157613 |            | 0.33030303 |            | 0.33030303  |             |  |           | 0.2093023 |
| ENSG00000173991 | 0.1257485  |            | 0.1257485  |             | 0.5         |  | 0.4709302 |           |
| ENSG00000185963 |            | 0.27575758 |            | 0.275757576 |             |  |           | 0.4666667 |
| ENSG00000204257 |            | 0.08181818 |            | 0.081818182 |             |  |           |           |
| ENSG00000160654 |            | 0.2804878  |            | 0.280487805 |             |  |           | 0.4318182 |
| ENSG00000065491 |            | 0.35670732 |            | 0.356707317 |             |  |           | 0.0581395 |
| ENSG00000180855 | 0.35227273 |            | 0.35227273 |             | 0.344444444 |  | 0.3977273 |           |
| ENSG00000148288 | 0.24850299 |            | 0.24850299 |             | 0.488095238 |  | 0.4764706 |           |
| ENSG00000145794 | 0.14670659 | 0.2183908  | 0.14670659 | 0.218390805 | 0.343373494 |  | 0.3895349 | 0.4285714 |
| ENSG00000149136 | 0.39520958 |            | 0.39520958 |             |             |  |           |           |
| ENSG00000197576 |            | 0.12121212 |            | 0.121212121 |             |  |           | 0.1569767 |
| ENSG00000143155 |            | 0.30909091 |            | 0.309090909 |             |  |           | 0.3953488 |
| ENSG00000144647 | 0.24251497 | 0.14110429 | 0.24251497 | 0.141104294 | 0.410714286 |  | 0.377907  |           |
| ENSG00000171053 |            | 0.5        |            | 0.5         |             |  |           | 0.4127907 |
| ENSG00000104763 |            | 0.36060606 |            | 0.360606061 |             |  |           | 0.4736842 |
| ENSG00000125538 | 0.34131737 |            | 0.34131737 |             | 0.463855422 |  | 0.4825581 |           |
| ENSG00000184313 | 0.2994012  | 0.48787879 | 0.2994012  | 0.487878788 | 0.168674699 |  | 0.2034884 | 0.1976744 |
| ENSG00000152413 |            | 0.44848485 |            | 0.448484848 |             |  |           | 0.2732558 |
| ENSG00000165983 | 0.11627907 | 0.45       | 0.11627907 | 0.45        | 0.388888889 |  | 0.3571429 | 0.3977273 |
| ENSG00000082701 |            | 0.32121212 |            | 0.321212121 |             |  |           | 0.5       |
| ENSG00000000457 |            | 0.11666667 |            | 0.116666667 |             |  |           |           |
| ENSG00000139496 |            | 0.37575758 |            | 0.375757576 |             |  |           | 0.4244186 |
| ENSG00000074317 |            |            |            |             |             |  |           | 0.4529412 |
| ENSG00000158691 |            | 0.36363636 |            | 0.363636364 |             |  |           | 0.4709302 |
| ENSG00000119446 |            | 0.48787879 |            | 0.487878788 |             |  |           | 0.1882353 |
| ENSG00000148541 | 0.35795455 | 0.38888889 | 0.35795455 | 0.388888889 | 0.465116279 |  | 0.4404762 | 0.3977273 |
| ENSG00000257860 | 0.34883721 |            | 0.34883721 |             | 0.452380952 |  | 0.475     |           |
| ENSG00000188991 |            | 0.49375    |            | 0.49375     |             |  |           | 0.2682927 |
| ENSG00000155975 |            | 0.48484848 |            | 0.484848485 |             |  |           | 0.3823529 |
| ENSG00000178722 |            | 0.24545455 |            | 0.245454545 |             |  |           | 0.2888889 |
| ENSG00000174007 | 0.2245509  | 0.37575758 | 0.2245509  | 0.375757576 | 0.43452381  |  | 0.4476744 | 0.0697674 |
| ENSG00000118197 | 0.17664671 | 0.42352941 | 0.17664671 | 0.423529412 | 0.357142857 |  | 0.3662791 | 0.4767442 |
| ENSG00000115290 | 0.13772455 | 0.39444444 | 0.13772455 | 0.394444444 | 0.279761905 |  | 0.494186  | 0.375     |
| ENSG00000129347 | 0.22155689 | 0.49390244 | 0.22155689 | 0.493902439 | 0.386904762 |  | 0.2764706 | 0.1337209 |
| ENSG00000123485 |            | 0.47878788 |            | 0.478787879 |             |  |           | 0.377907  |
| ENSG00000147677 |            | 0.11515152 |            | 0.115151515 |             |  |           | 0.4588235 |
| ENSG00000109184 | 0.2245509  | 0.33139535 | 0.2245509  | 0.331395349 | 0.375       |  | 0.3372093 | 0.3444444 |
| ENSG00000157593 |            | 0.17575758 |            | 0.175757576 |             |  |           | 0.4651163 |
| ENSG00000077809 | 0.23053892 |            | 0.23053892 |             | 0.071428571 |  | 0.0813953 |           |
| ENSG00000115514 |            | 0.49444444 |            | 0.494444444 |             |  |           | 0.3181818 |
| ENSG00000215790 |            | 0.48314607 |            | 0.483146067 |             |  |           | 0.3777778 |
| ENSG00000189167 | 0.47005988 | 0.14634146 | 0.47005988 | 0.146341463 | 0.477272727 |  | 0.4404762 | 0.1352941 |
| ENSG00000035664 | 0.28742515 |            | 0.28742515 |             |             |  |           | 0.2       |
| ENSG00000085999 | 0.08982036 |            | 0.08982036 |             |             |  |           |           |
| ENSG00000131018 |            | 0.20909091 |            | 0.209090909 |             |  |           | 0.4186047 |
| ENSG00000155893 | 0.48809524 | 0.22727273 | 0.48809524 | 0.227272727 | 0.172619048 |  | 0.1666667 | 0.4390244 |
| ENSG00000102359 | 0.15       |            | 0.15       |             | 0.177777778 |  | 0.1931818 |           |
| ENSG00000196476 |            | 0.45454545 |            | 0.454545455 |             |  |           | 0.4825581 |
| ENSG00000166126 | 0.43113772 | 0.31818182 | 0.43113772 | 0.318181818 | 0.238095238 |  | 0.2906977 | 0.125     |
| ENSG00000092964 |            | 0.44817073 |            | 0.448170732 |             |  |           | 0.4883721 |
| ENSG00000091664 |            | 0.41111111 |            | 0.411111111 |             |  |           | 0.3588235 |
| ENSG00000164743 | 0.0952381  |            | 0.0952381  |             |             |  |           |           |

|                 |            |            |            |             |             |           |           |
|-----------------|------------|------------|------------|-------------|-------------|-----------|-----------|
| ENSG00000181656 | 0.14670659 | 0.37267081 | 0.14670659 | 0.372670807 | 0.303571429 | 0.25      | 0.3837209 |
| ENSG00000159346 |            | 0.28651685 |            | 0.286516854 |             |           | 0.1860465 |
| ENSG00000100330 | 0.1        | 0.42777778 | 0.1        | 0.42777778  | 0.144444444 |           | 0.4431818 |
| ENSG00000172476 | 0.29341317 |            | 0.29341317 |             |             |           |           |
| ENSG00000172070 |            | 0.3030303  |            | 0.303030303 |             |           | 0.4302326 |
| ENSG00000165359 | 0.08383234 |            | 0.08383234 |             |             | 0.1046512 |           |
| ENSG00000146083 |            |            |            |             |             |           | 0.0681818 |
| ENSG00000135272 |            | 0.20555556 |            | 0.205555556 |             |           | 0.2738095 |
| ENSG00000141401 |            | 0.05454545 |            | 0.054545455 |             |           |           |
| ENSG00000134748 |            | 0.23595506 |            | 0.235955056 |             |           | 0.1395349 |
| ENSG00000105993 |            | 0.39090909 |            | 0.390909091 |             |           | 0.4470588 |
| ENSG00000234906 | 0.2439759  | 0.31609195 | 0.2439759  | 0.316091954 | 0.297619048 | 0.3058824 | 0.4756098 |
| ENSG00000109790 | 0.40340909 | 0.44444444 | 0.40340909 | 0.444444444 | 0.155555556 | 0.1477273 | 0.3604651 |
| ENSG00000080618 |            | 0.33742331 |            | 0.337423313 |             |           | 0.2906977 |
| ENSG00000134014 | 0.11805556 | 0.44382022 | 0.11805556 | 0.443820225 | 0.473684211 | 0.3235294 |           |
| ENSG00000026950 | 0.19461078 | 0.17878788 | 0.19461078 | 0.178787879 | 0.172619048 | 0.1802326 | 0.0526316 |
| ENSG00000165288 |            |            |            |             |             |           | 0.4244186 |
| ENSG00000175806 |            | 0.36969697 |            | 0.36969697  |             |           | 0.4705882 |
| ENSG00000162437 |            | 0.40123457 |            | 0.401234568 |             |           | 0.35      |
| ENSG00000125430 | 0.23053892 | 0.42134831 | 0.23053892 | 0.421348315 | 0.303571429 | 0.3023256 | 0.4709302 |
| ENSG00000123908 |            | 0.42121212 |            | 0.421212121 |             |           | 0.5       |
| ENSG00000221944 | 0.15568862 |            | 0.15568862 |             | 0.142857143 | 0.0941176 |           |
| ENSG00000064703 |            |            |            |             | 0.188888889 | 0.2159091 |           |
| ENSG00000111199 |            | 0.15151515 |            | 0.151515152 |             |           | 0.1918605 |
| ENSG00000106638 |            | 0.30588235 |            | 0.305882353 |             |           | 0.1104651 |
| ENSG00000133687 |            | 0.49378882 |            | 0.49378882  |             |           | 0.494186  |
| ENSG00000198523 | 0.0508982  | 0.29444444 | 0.0508982  | 0.294444444 |             |           | 0.2954545 |
| ENSG00000258818 | 0.47904192 | 0.25914634 | 0.47904192 | 0.259146341 |             |           | 0.4186047 |
| ENSG00000186635 | 0.48888889 |            | 0.48888889 |             | 0.344444444 | 0.3068182 |           |
| ENSG00000166199 | 0.05421687 | 0.35757576 | 0.05421687 | 0.357575758 |             |           | 0.1395349 |
| ENSG00000197322 |            | 0.43636364 |            | 0.436363636 |             |           | 0.494186  |
| ENSG00000166946 |            | 0.08484848 |            | 0.084848485 |             |           | 0.0666667 |
| ENSG00000130943 |            | 0.1554878  |            | 0.155487805 |             |           |           |
| ENSG00000148584 | 0.19760479 |            | 0.19760479 |             | 0.05952381  | 0.0755814 |           |
| ENSG00000170954 | 0.36526946 | 0.45121951 | 0.36526946 | 0.451219512 | 0.339285714 | 0.2790698 | 0.3764706 |
| ENSG00000122257 | 0.05405405 |            | 0.05405405 |             |             |           |           |
| ENSG00000115380 | 0.06111111 |            | 0.06111111 |             |             |           |           |
| ENSG00000198642 |            | 0.19393939 |            | 0.193939394 |             |           | 0.5       |
| ENSG00000119801 |            | 0.15       |            | 0.15        |             |           | 0.375     |
| ENSG00000003987 |            | 0.30606061 |            | 0.306060606 |             |           | 0.3953488 |
| ENSG00000156239 |            | 0.33908046 |            | 0.33908046  |             |           | 0.4534884 |
| ENSG00000135372 |            | 0.14848485 |            | 0.148484848 |             |           | 0.4651163 |
| ENSG00000158077 | 0.07303371 |            | 0.07303371 |             | 0.155555556 | 0.1704545 |           |
| ENSG00000163541 |            | 0.06060606 |            | 0.060606061 |             |           | 0.0523256 |
| ENSG00000187772 |            | 0.29213483 |            | 0.292134831 |             |           | 0.5       |
| ENSG00000204007 |            | 0.15757576 |            | 0.157575758 |             |           | 0.2209302 |
| ENSG00000042980 | 0.18263473 | 0.45454545 | 0.18263473 | 0.454545455 | 0.404761905 | 0.3882353 | 0.4186047 |
| ENSG00000177721 | 0.38323353 |            | 0.38323353 |             |             |           |           |
| ENSG00000163961 | 0.375      | 0.41212121 | 0.375      | 0.412121212 | 0.377777778 | 0.3295455 | 0.1411765 |
| ENSG00000134333 | 0.05681818 | 0.41212121 | 0.05681818 | 0.412121212 |             |           | 0.4360465 |
| ENSG00000112282 |            | 0.31515152 |            | 0.315151515 |             |           | 0.3855422 |
| ENSG00000175093 | 0.43113772 | 0.10559006 | 0.43113772 | 0.105590062 |             |           | 0.1569767 |
| ENSG00000204394 | 0.09638554 |            | 0.09638554 |             |             |           |           |
| ENSG00000137106 | 0.27844311 |            | 0.27844311 |             | 0.160714286 | 0.1453488 | 0.1477273 |

|                 |            |            |            |             |             |  |           |           |
|-----------------|------------|------------|------------|-------------|-------------|--|-----------|-----------|
| ENSG00000126460 | 0.40419162 |            | 0.40419162 |             | 0.232142857 |  | 0.1569767 |           |
| ENSG00000137076 |            |            |            |             |             |  |           | 0.0529412 |
| ENSG0000040531  |            | 0.22121212 |            | 0.22121212  | 0.240963855 |  | 0.2790698 | 0.2616279 |
| ENSG00000149131 |            | 0.2        |            | 0.2         |             |  |           |           |
| ENSG00000178776 |            | 0.0505618  |            | 0.050561798 |             |  |           | 0.1222222 |
| ENSG00000133773 |            | 0.15151515 |            | 0.151515152 |             |  |           |           |
| ENSG00000109084 |            | 0.05454545 |            | 0.054545455 |             |  |           | 0.1627907 |
| ENSG00000248485 |            | 0.18023256 |            | 0.180232558 |             |  |           | 0.2564103 |
| ENSG00000186094 |            | 0.40909091 |            | 0.409090909 |             |  |           | 0.4127907 |
| ENSG00000154639 |            | 0.37222222 |            | 0.372222222 |             |  |           | 0.4545455 |
| ENSG00000139505 | 0.0748503  | 0.16666667 | 0.0748503  | 0.166666667 | 0.409638554 |  | 0.4709302 | 0.4888889 |
| ENSG00000179051 |            | 0.33030303 |            | 0.33030303  |             |  |           | 0.4883721 |
| ENSG00000139921 |            | 0.31609195 |            | 0.316091954 |             |  |           | 0.255814  |
| ENSG00000106211 | 0.06060606 |            | 0.06060606 |             |             |  |           |           |
| ENSG00000177047 |            | 0.3969697  |            | 0.396969697 |             |  |           | 0.1453488 |
| ENSG00000175911 |            | 0.16666667 |            | 0.166666667 |             |  |           | 0.0813953 |
| ENSG00000176907 |            | 0.35555556 |            | 0.355555556 |             |  |           | 0.4431818 |
| ENSG00000196387 | 0.43712575 | 0.4        | 0.43712575 | 0.4         | 0.214285714 |  | 0.1529412 | 0.4659091 |
| ENSG00000101977 | 0.06363636 |            | 0.06363636 |             | 0.113095238 |  | 0.0764706 |           |
| ENSG00000149948 |            | 0.49090909 |            | 0.490909091 |             |  |           | 0.3081395 |
| ENSG00000259486 |            | 0.24545455 |            | 0.245454545 |             |  |           | 0.4352941 |
| ENSG00000134109 |            | 0.46060606 |            | 0.460606061 |             |  |           | 0.4360465 |
| ENSG00000179630 |            | 0.4689441  |            | 0.468944099 | 0.101190476 |  | 0.0872093 | 0.3072289 |
| ENSG00000149532 | 0.45508982 |            | 0.45508982 |             |             |  |           |           |
| ENSG00000100150 |            | 0.14329268 |            | 0.143292683 |             |  |           | 0.1352941 |
| ENSG00000103522 |            | 0.24848485 |            | 0.248484848 |             |  |           | 0.1453488 |
| ENSG00000141252 |            | 0.45890411 |            | 0.45890411  |             |  |           | 0.3295455 |
| ENSG00000127903 | 0.38922156 |            | 0.38922156 |             | 0.30952381  |  | 0.3895349 |           |
| ENSG00000155363 |            |            |            |             | 0.077777778 |  | 0.0795455 |           |
| ENSG00000205929 |            | 0.25555556 |            | 0.255555556 |             |  |           |           |
| ENSG00000173218 |            | 0.38484848 |            | 0.384848485 |             |  |           | 0.4651163 |
| ENSG00000156931 | 0.28089888 | 0.36809816 | 0.28089888 | 0.36809816  | 0.344444444 |  | 0.4333333 | 0.4529412 |
| ENSG00000211660 | 0.11585366 |            | 0.11585366 |             |             |  |           |           |
| ENSG00000184029 |            | 0.38343558 |            | 0.383435583 |             |  |           | 0.1       |
| ENSG00000254979 |            | 0.31707317 |            | 0.317073171 |             |  |           | 0.3176471 |
| ENSG00000136450 |            | 0.16666667 |            | 0.166666667 |             |  |           |           |
| ENSG00000140557 |            | 0.36060606 |            | 0.360606061 |             |  |           | 0.4444444 |
| ENSG00000164309 |            | 0.13333333 |            | 0.133333333 |             |  |           | 0.0639535 |
| ENSG00000142599 | 0.39263804 | 0.46666667 | 0.39263804 | 0.466666667 |             |  | 0.0697674 | 0.2176471 |
| ENSG00000101003 |            | 0.46646341 |            | 0.466463415 |             |  |           | 0.1046512 |
| ENSG00000197816 | 0.17365269 | 0.45031056 | 0.17365269 | 0.450310559 | 0.119047619 |  | 0.0988372 | 0.4593023 |
| ENSG00000177469 |            | 0.13496933 |            | 0.134969325 |             |  |           | 0.1395349 |
| ENSG00000113578 |            | 0.40243902 |            | 0.402439024 |             |  |           | 0.3846154 |
| ENSG00000198060 |            | 0.44545455 |            | 0.445454545 | 0.233333333 |  | 0.0909091 | 0.4593023 |
| ENSG00000227057 | 0.19277108 |            | 0.19277108 |             | 0.355421687 |  | 0.3255814 |           |
| ENSG00000196683 | 0.24251497 | 0.40555556 | 0.24251497 | 0.405555556 | 0.386904762 |  | 0.372093  | 0.3837209 |
| ENSG00000116729 |            | 0.35454545 |            | 0.354545455 |             |  |           | 0.4651163 |
| ENSG00000104808 |            | 0.08181818 |            | 0.081818182 |             |  |           | 0.0872093 |
| ENSG00000066294 |            | 0.39090909 |            | 0.390909091 |             |  |           | 0.4011628 |
| ENSG00000172116 |            | 0.26060606 |            | 0.260606061 |             |  |           | 0.0523256 |
| ENSG00000100162 |            |            |            |             | 0.154761905 |  | 0.1337209 |           |
| ENSG00000106399 | 0.33233533 | 0.18209877 | 0.33233533 | 0.182098765 | 0.148809524 |  | 0.0813953 | 0.0882353 |
| ENSG00000186335 |            | 0.49444444 |            | 0.494444444 |             |  |           | 0.1590909 |
| ENSG00000185252 |            | 0.4030303  |            | 0.403030303 |             |  |           | 0.377907  |

|                        |            |            |            |             |             |           |           |
|------------------------|------------|------------|------------|-------------|-------------|-----------|-----------|
| <b>ENSG00000169905</b> |            | 0.46969697 |            | 0.46969697  |             |           | 0.2906977 |
| <b>ENSG0000074211</b>  | 0.34242424 | 0.5        | 0.34242424 | 0.5         | 0.226190476 | 0.2882353 | 0.4709302 |
| <b>ENSG00000161010</b> | 0.13473054 | 0.5        | 0.13473054 | 0.5         | 0.214285714 | 0.1976744 | 0.4883721 |
| <b>ENSG00000143627</b> |            | 0.29393939 |            | 0.293939394 |             |           | 0.2616279 |
| <b>ENSG00000136718</b> | 0.1257485  |            | 0.1257485  |             |             |           |           |
| <b>ENSG00000163814</b> |            | 0.42424242 |            | 0.424242424 |             |           | 0.2965116 |
| <b>ENSG00000164188</b> |            |            |            |             |             |           | 0.3928571 |
| <b>ENSG00000205041</b> |            | 0.36969697 |            | 0.36969697  |             |           | 0.4117647 |
| <b>ENSG00000085274</b> |            | 0.23333333 |            | 0.233333333 |             |           | 0.2261905 |
| <b>ENSG00000146809</b> | 0.15555556 |            | 0.15555556 |             | 0.196428571 | 0.2674419 |           |
| <b>ENSG00000198088</b> | 0.16766467 | 0.34848485 | 0.16766467 | 0.348484848 | 0.482142857 | 0.4764706 | 0.4767442 |
| <b>ENSG00000174945</b> | 0.38888889 | 0.49090909 | 0.38888889 | 0.490909091 | 0.311111111 | 0.2272727 | 0.2151163 |
| <b>ENSG00000039139</b> |            | 0.4969697  |            | 0.496969697 |             |           | 0.4244186 |
| <b>ENSG00000079308</b> | 0.32335329 | 0.47575758 | 0.32335329 | 0.475757576 | 0.416666667 | 0.4651163 | 0.4651163 |
| <b>ENSG00000007171</b> | 0.25       |            | 0.25       |             | 0.488888889 | 0.4090909 |           |
| <b>ENSG00000135175</b> |            | 0.44512195 |            | 0.445121951 |             |           | 0.3636364 |
| <b>ENSG00000253976</b> |            | 0.44848485 |            | 0.448484848 | 0.321428571 | 0.3895349 | 0.3255814 |
| <b>ENSG00000100014</b> |            | 0.49090909 |            | 0.490909091 |             |           | 0.3313953 |
| <b>ENSG00000107816</b> | 0.43712575 | 0.2030303  | 0.43712575 | 0.203030303 | 0.493975904 | 0.4534884 | 0.4418605 |
| <b>ENSG00000163218</b> | 0.28527607 | 0.4969697  | 0.28527607 | 0.496969697 | 0.092592593 | 0.0654762 | 0.244186  |
| <b>ENSG00000175077</b> |            | 0.14848485 |            | 0.148484848 |             |           | 0.3255814 |
| <b>ENSG00000167508</b> |            | 0.36666667 |            | 0.366666667 |             |           | 0.4767442 |
| <b>ENSG00000052850</b> |            | 0.35365854 |            | 0.353658537 |             |           | 0.3809524 |
| <b>ENSG00000112414</b> |            | 0.18902439 |            | 0.18902439  |             |           | 0.2333333 |
| <b>ENSG00000167523</b> |            | 0.26111111 |            | 0.261111111 |             |           | 0.4222222 |
| <b>ENSG00000174705</b> |            | 0.43939394 |            | 0.439393939 |             |           | 0.494186  |
| <b>ENSG00000138604</b> |            | 0.34242424 |            | 0.342424242 |             |           | 0.494186  |
| <b>ENSG00000196937</b> |            | 0.15243902 |            | 0.152439024 |             |           |           |
| <b>ENSG00000235931</b> | 0.22754491 | 0.49393939 | 0.22754491 | 0.493939394 | 0.196428571 | 0.1337209 | 0.4659091 |
| <b>ENSG00000173226</b> |            | 0.33939394 |            | 0.339393939 |             |           | 0.3430233 |
| <b>ENSG00000112146</b> | 0.25748503 | 0.21818182 | 0.25748503 | 0.218181818 |             |           | 0.1627907 |
| <b>ENSG00000196542</b> | 0.24698795 | 0.4969697  | 0.24698795 | 0.496969697 | 0.482142857 | 0.4709302 | 0.4       |
| <b>ENSG00000122375</b> |            | 0.16969697 |            | 0.16969697  |             |           | 0.4302326 |
| <b>ENSG00000183475</b> |            | 0.24390244 |            | 0.243902439 |             |           | 0.1162791 |
| <b>ENSG00000253327</b> |            | 0.05757576 |            | 0.057575758 |             |           | 0.25      |
| <b>ENSG00000030110</b> |            | 0.31111111 |            | 0.311111111 |             |           | 0.2045455 |
| <b>ENSG00000120903</b> | 0.30239521 | 0.47126437 | 0.30239521 | 0.471264368 | 0.202380952 | 0.3081395 | 0.4772727 |
| <b>ENSG00000001461</b> | 0.46686747 | 0.49079755 | 0.46686747 | 0.490797546 | 0.321428571 | 0.2732558 | 0.3411765 |
| <b>ENSG00000088926</b> | 0.37790698 | 0.35151515 | 0.37790698 | 0.351515152 | 0.344444444 | 0.2272727 | 0.2093023 |
| <b>ENSG00000176920</b> |            | 0.43636364 |            | 0.436363636 |             |           |           |
| <b>ENSG00000048828</b> |            | 0.38235294 |            | 0.382352941 |             |           | 0.4886364 |
| <b>ENSG00000185158</b> |            | 0.14545455 |            | 0.145454545 |             |           |           |
| <b>ENSG00000197901</b> | 0.41573034 |            | 0.41573034 |             | 0.272727273 | 0.2777778 |           |
| <b>ENSG00000181751</b> |            | 0.43181818 |            | 0.431818182 |             |           | 0.3095238 |
| <b>ENSG00000211810</b> | 0.30239521 |            | 0.30239521 |             | 0.422619048 | 0.4534884 |           |
| <b>ENSG00000178932</b> |            |            |            |             |             |           | 0.3333333 |
| <b>ENSG00000119707</b> |            | 0.0969697  |            | 0.096969697 |             |           | 0.1453488 |
| <b>ENSG00000152234</b> | 0.28571429 | 0.41358025 | 0.28571429 | 0.413580247 | 0.426829268 | 0.4294118 | 0.0529412 |
| <b>ENSG00000176927</b> | 0.40662651 |            | 0.40662651 |             | 0.304878049 | 0.3095238 |           |
| <b>ENSG00000112218</b> | 0.17777778 |            | 0.17777778 |             |             |           |           |
| <b>ENSG00000135916</b> | 0.23888889 |            | 0.23888889 |             | 0.107142857 | 0.2848837 |           |
| <b>ENSG00000139278</b> |            | 0.42331288 |            | 0.423312883 |             |           | 0.494186  |
| <b>ENSG00000174514</b> |            | 0.15757576 |            | 0.157575758 |             |           | 0.4090909 |
| <b>ENSG00000157036</b> | 0.4760479  | 0.4        | 0.4760479  | 0.4         | 0.369047619 | 0.4418605 | 0.4651163 |



|                 |            |            |            |             |             |           |           |
|-----------------|------------|------------|------------|-------------|-------------|-----------|-----------|
| ENSG00000136238 |            | 0.22121212 |            | 0.221212121 |             |           | 0.1569767 |
| ENSG00000135144 | 0.46385542 |            | 0.46385542 |             | 0.360465116 | 0.325     |           |
| ENSG00000099860 |            |            |            |             |             |           | 0.1111111 |
| ENSG00000132388 |            | 0.32621951 |            | 0.326219512 |             |           | 0.3081395 |
| ENSG00000166025 |            | 0.16871166 |            | 0.168711656 |             |           | 0.0833333 |
| ENSG00000197620 | 0.0753012  |            | 0.0753012  |             | 0.095238095 | 0.1511628 |           |
| ENSG00000176438 | 0.29444444 | 0.43030303 | 0.29444444 | 0.43030303  |             |           | 0.3488372 |
| ENSG00000233889 | 0.2826087  |            | 0.2826087  |             |             |           |           |
| ENSG00000167861 |            | 0.46969697 |            | 0.46969697  |             |           | 0.4204545 |
| ENSG00000187122 |            | 0.23030303 |            | 0.23030303  |             |           | 0.127907  |
| ENSG00000243156 |            | 0.42424242 |            | 0.424242424 |             |           | 0.2906977 |
| ENSG00000136546 |            | 0.32424242 |            | 0.324242424 |             |           | 0.2616279 |
| ENSG00000149262 |            | 0.29393939 |            | 0.293939394 |             |           | 0.1860465 |
| ENSG00000090857 |            | 0.34659091 |            | 0.346590909 |             |           | 0.4302326 |
| ENSG00000047365 | 0.17272727 | 0.49090909 | 0.17272727 | 0.490909091 | 0.259259259 | 0.1363636 | 0.2764706 |
| ENSG00000100023 |            | 0.39444444 |            | 0.394444444 |             |           | 0.4244186 |
| ENSG00000171224 |            | 0.35454545 |            | 0.354545455 |             |           | 0.1569767 |
| ENSG00000136931 |            | 0.4382716  |            | 0.438271605 |             |           | 0.1976744 |
| ENSG00000104388 |            | 0.40909091 |            | 0.409090909 |             |           | 0.4360465 |
| ENSG00000148296 |            | 0.43636364 |            | 0.436363636 |             |           | 0.2616279 |
| ENSG00000165475 |            | 0.28963415 |            | 0.289634146 |             |           | 0.4235294 |
| ENSG00000151224 |            | 0.27575758 |            | 0.275757576 |             |           | 0.0988372 |
| ENSG00000169439 | 0.39772727 | 0.23888889 | 0.39772727 | 0.238888889 | 0.411111111 | 0.4659091 | 0.1333333 |
| ENSG00000105270 |            |            |            |             |             |           | 0.1511628 |
| ENSG00000183653 |            | 0.42638037 |            | 0.426380368 |             |           | 0.2797619 |
| ENSG00000089486 |            | 0.38764045 |            | 0.387640449 |             |           | 0.3139535 |
| ENSG00000109625 | 0.45808383 | 0.5        | 0.45808383 | 0.5         | 0.386904762 | 0.3117647 | 0.4642857 |
| ENSG00000145217 |            | 0.12424242 |            | 0.124242424 |             |           | 0.122093  |
| ENSG00000140265 |            | 0.23333333 |            | 0.233333333 |             |           | 0.2272727 |
| ENSG00000096093 |            | 0.20909091 |            | 0.209090909 |             |           | 0.2151163 |
| ENSG00000001460 | 0.23053892 | 0.14242424 | 0.23053892 | 0.142424242 | 0.451219512 | 0.4709302 |           |
| ENSG00000139370 | 0.43975904 | 0.48787879 | 0.43975904 | 0.487878788 | 0.277777778 | 0.2176471 | 0.4318182 |
| ENSG00000253873 |            | 0.20224719 |            | 0.202247191 |             |           | 0.1477273 |
| ENSG00000196505 |            | 0.45       |            | 0.45        |             |           | 0.125     |
| ENSG00000186470 |            | 0.30909091 |            | 0.309090909 |             |           | 0.1888889 |
| ENSG00000122644 | 0.06886228 | 0.08484848 | 0.06886228 | 0.084848485 | 0.351190476 | 0.3953488 | 0.2151163 |
| ENSG00000162552 |            |            |            |             |             |           | 0.1704545 |
| ENSG00000125484 |            | 0.37272727 |            | 0.372727273 |             |           | 0.4659091 |
| ENSG00000106477 | 0.30239521 | 0.37222222 | 0.30239521 | 0.372222222 | 0.31547619  | 0.2848837 | 0.1744186 |
| ENSG00000128000 |            |            |            |             |             |           | 0.127907  |
| ENSG00000146676 |            | 0.4494382  |            | 0.449438202 |             |           | 0.244186  |
| ENSG00000125835 | 0.06586826 | 0.08988764 | 0.06586826 | 0.08988764  | 0.196428571 | 0.3255814 | 0.3111111 |
| ENSG00000171864 |            | 0.4847561  |            | 0.484756098 |             |           | 0.4819277 |
| ENSG00000111860 |            | 0.45348837 |            | 0.453488372 |             |           | 0.3295455 |
| ENSG00000149968 |            | 0.43333333 |            | 0.433333333 |             |           | 0.2727273 |
| ENSG00000178719 |            | 0.41515152 |            | 0.415151515 |             |           | 0.1453488 |
| ENSG00000179909 |            | 0.48765432 |            | 0.487654321 |             |           | 0.4642857 |
| ENSG00000179855 |            | 0.48888889 |            | 0.488888889 |             |           | 0.3081395 |
| ENSG00000204140 |            |            |            |             |             |           | 0.0769231 |
| ENSG00000121904 | 0.2754491  | 0.39130435 | 0.2754491  | 0.391304348 | 0.119047619 | 0.1882353 | 0.4235294 |
| ENSG00000155530 |            |            |            |             |             |           | 0.1162791 |
| ENSG00000180785 | 0.28143713 | 0.49090909 | 0.28143713 | 0.490909091 | 0.369047619 | 0.4127907 | 0.2235294 |
| ENSG00000142039 |            | 0.12883436 |            | 0.128834356 |             |           | 0.255814  |
| ENSG00000006704 | 0.30239521 |            | 0.30239521 |             | 0.3         | 0.4886364 |           |

|                |            |            |            |             |             |           |           |
|----------------|------------|------------|------------|-------------|-------------|-----------|-----------|
| ENSG0000072364 |            | 0.44545455 |            | 0.44545455  |             |           | 0.4941176 |
| ENSG0000171105 |            | 0.42121212 |            | 0.42121212  |             |           | 0.4651163 |
| ENSG0000176542 |            | 0.3030303  |            | 0.303030303 |             |           | 0.2965116 |
| ENSG0000118257 | 0.4491018  | 0.45454545 | 0.4491018  | 0.454545455 | 0.445783133 | 0.4588235 | 0.4825581 |
| ENSG0000131094 |            | 0.49444444 |            | 0.494444444 |             |           |           |
| ENSG0000183597 | 0.33832335 | 0.40184049 | 0.33832335 | 0.401840491 | 0.446428571 | 0.4360465 | 0.5       |
| ENSG0000237896 |            |            |            |             |             |           | 0.1511628 |
| ENSG0000106006 |            |            |            |             |             |           | 0.2261905 |
| ENSG0000106013 | 0.05769231 |            | 0.05769231 |             | 0.097560976 | 0.0512821 |           |
| ENSG0000166736 | 0.48203593 | 0.24545455 | 0.48203593 | 0.245454545 | 0.246987952 | 0.2790698 | 0.2267442 |
| ENSG0000178502 |            | 0.06666667 |            | 0.066666667 |             |           |           |
| ENSG0000130159 |            | 0.05521472 |            | 0.055214724 |             |           |           |
| ENSG0000138750 |            | 0.37195122 |            | 0.37195122  |             |           | 0.3414634 |
| ENSG0000167083 | 0.08982036 | 0.36666667 | 0.08982036 | 0.366666667 | 0.053571429 |           | 0.0823529 |
| ENSG0000005812 |            |            |            |             |             |           | 0.3023256 |
| ENSG0000168367 | 0.32335329 |            | 0.32335329 |             | 0.208333333 | 0.2352941 |           |
| ENSG0000258804 | 0.20359281 |            | 0.20359281 |             | 0.291666667 | 0.2965116 |           |
| ENSG0000164120 | 0.18562874 | 0.41515152 | 0.18562874 | 0.415151515 | 0.452380952 | 0.4418605 | 0.494186  |
| ENSG0000126010 | 0.36585366 | 0.25153374 | 0.36585366 | 0.251533742 | 0.089285714 | 0.2093023 | 0.2209302 |
| ENSG0000083842 | 0.13473054 | 0.36280488 | 0.13473054 | 0.362804878 |             |           | 0.4360465 |
| ENSG0000138395 | 0.47777778 | 0.33030303 | 0.47777778 | 0.33030303  | 0.388888889 | 0.4545455 | 0.3604651 |
| ENSG0000143125 |            | 0.1097561  |            | 0.109756098 |             |           |           |
| ENSG0000105696 |            | 0.41818182 |            | 0.418181818 |             |           | 0.3941176 |
| ENSG0000131069 | 0.48502994 | 0.38484848 | 0.48502994 | 0.384848485 | 0.409638554 | 0.3430233 | 0.3430233 |
| ENSG0000148053 |            | 0.47272727 |            | 0.472727273 |             |           | 0.4545455 |
| ENSG0000005700 |            | 0.24213836 |            | 0.242138365 |             |           | 0.2840909 |
| ENSG0000111269 |            | 0.44545455 |            | 0.445454545 |             |           | 0.494186  |
| ENSG0000213445 | 0.14071856 |            | 0.14071856 |             | 0.244047619 | 0.2151163 |           |
| ENSG0000163738 |            | 0.24342105 |            | 0.243421053 |             |           | 0.1941176 |
| ENSG0000124383 | 0.2247191  |            | 0.2247191  |             | 0.369047619 | 0.3837209 |           |
| ENSG0000104177 |            |            |            |             |             |           | 0.4534884 |
| ENSG0000111696 |            | 0.47272727 |            | 0.472727273 |             |           | 0.3511905 |
| ENSG0000133083 | 0.10119048 | 0.46646341 | 0.10119048 | 0.466463415 |             |           | 0.4534884 |
| ENSG0000172985 |            | 0.15151515 |            | 0.151515152 |             |           | 0.3023256 |
| ENSG0000168040 |            | 0.4695122  |            | 0.469512195 |             |           | 0.3255814 |
| ENSG0000126368 | 0.36227545 |            | 0.36227545 |             | 0.464285714 | 0.4476744 |           |
| ENSG0000204941 |            | 0.171875   |            | 0.171875    |             |           | 0.4702381 |
| ENSG0000123119 |            | 0.32317073 |            | 0.323170732 |             |           | 0.2882353 |
| ENSG0000132359 |            | 0.41666667 |            | 0.416666667 |             |           | 0.3139535 |
| ENSG0000103018 |            | 0.41515152 |            | 0.415151515 |             |           | 0.4651163 |
| ENSG0000145088 |            | 0.12727273 |            | 0.127272727 |             |           | 0.3430233 |
| ENSG0000181965 |            |            |            |             | 0.214285714 | 0.2151163 |           |
| ENSG0000138095 |            | 0.09444444 |            | 0.094444444 |             |           |           |
| ENSG0000113583 |            | 0.08841463 |            | 0.088414634 |             |           | 0.0639535 |
| ENSG0000204642 | 0.27840909 | 0.47619048 | 0.27840909 | 0.476190476 | 0.411111111 | 0.375     | 0.494186  |
| ENSG0000140025 | 0.1497006  | 0.49386503 | 0.1497006  | 0.493865031 |             |           | 0.4772727 |
| ENSG0000110660 | 0.2245509  | 0.48333333 | 0.2245509  | 0.483333333 | 0.404761905 | 0.4302326 | 0.3176471 |
| ENSG0000100109 |            | 0.07222222 |            | 0.072222222 | 0.277108434 | 0.2380952 | 0.125     |
| ENSG0000132549 |            | 0.20606061 |            | 0.206060606 |             |           | 0.1       |
| ENSG0000198758 |            | 0.40555556 |            | 0.405555556 |             |           | 0.3181818 |
| ENSG0000123552 | 0.14444444 | 0.47272727 | 0.14444444 | 0.472727273 | 0.494047619 | 0.4069767 | 0.3837209 |
| ENSG0000178980 |            |            |            |             |             |           | 0.0909091 |
| ENSG0000091536 | 0.23030303 | 0.22121212 | 0.23030303 | 0.221212121 |             |           | 0.3546512 |
| ENSG0000180573 | 0.25449102 |            | 0.25449102 |             | 0.267857143 | 0.1686047 |           |

|                 |            |            |            |             |             |           |           |
|-----------------|------------|------------|------------|-------------|-------------|-----------|-----------|
| ENSG00000204620 |            | 0.06666667 |            | 0.06666667  |             |           | 0.0523256 |
| ENSG00000100365 |            | 0.05454545 |            | 0.05454545  |             |           |           |
| ENSG00000145029 |            | 0.2826087  |            | 0.282608696 |             |           |           |
| ENSG00000134759 | 0.36445783 | 0.32621951 | 0.36445783 | 0.326219512 | 0.18452381  | 0.2058824 | 0.2228916 |
| ENSG00000141127 | 0.39221557 | 0.17575758 | 0.39221557 | 0.175757576 | 0.333333333 | 0.3372093 | 0.0588235 |
| ENSG00000132313 |            | 0.48333333 |            | 0.483333333 |             |           | 0.4883721 |
| ENSG00000157456 | 0.07185629 |            | 0.07185629 |             |             |           |           |
| ENSG00000154727 |            |            |            |             |             |           | 0.0714286 |
| ENSG00000154263 |            | 0.41515152 |            | 0.415151515 | 0.108433735 | 0.0639535 | 0.4127907 |
| ENSG00000184840 |            | 0.46666667 |            | 0.46666667  |             |           | 0.4659091 |
| ENSG00000177084 | 0.38323353 | 0.43678161 | 0.38323353 | 0.436781609 | 0.386904762 | 0.2965116 | 0.25      |
| ENSG00000177076 |            | 0.45454545 |            | 0.454545455 |             |           | 0.1111111 |
| ENSG00000112419 |            | 0.23333333 |            | 0.233333333 |             |           | 0.3953488 |
| ENSG00000167670 |            | 0.23939394 |            | 0.239393939 |             |           | 0.3255814 |
| ENSG00000129657 | 0.3502994  | 0.30909091 | 0.3502994  | 0.309090909 | 0.433333333 | 0.3488372 | 0.25      |
| ENSG00000153898 |            | 0.33841463 |            | 0.338414634 |             |           | 0.3546512 |
| ENSG00000132466 |            | 0.18944099 |            | 0.189440994 |             |           | 0.3095238 |
| ENSG00000123104 |            | 0.33939394 |            | 0.339393939 |             |           | 0.3895349 |
| ENSG00000171401 |            | 0.44968553 |            | 0.449685535 |             |           | 0.4573171 |
| ENSG00000142619 |            | 0.31410256 |            | 0.314102564 |             |           | 0.0581395 |
| ENSG00000107551 | 0.43413174 |            | 0.43413174 |             | 0.464285714 | 0.4186047 | 0.1744186 |
| ENSG00000168246 |            | 0.29878049 |            | 0.298780488 |             |           | 0.4702381 |
| ENSG00000128944 |            | 0.14939024 |            | 0.149390244 |             |           |           |
| ENSG00000103415 |            | 0.4030303  |            | 0.403030303 |             |           | 0.3411765 |
| ENSG00000167531 |            | 0.09444444 |            | 0.094444444 |             |           | 0.125     |
| ENSG00000126895 |            | 0.37195122 |            | 0.37195122  | 0.06666667  | 0.0568182 | 0.255814  |
| ENSG00000090924 |            | 0.45       |            | 0.45        |             |           | 0.375     |
| ENSG00000112658 |            | 0.05454545 |            | 0.054545455 |             |           | 0.3488372 |
| ENSG00000077943 | 0.0748503  | 0.32121212 | 0.0748503  | 0.321212121 | 0.119047619 | 0.1802326 | 0.4756098 |
| ENSG00000139648 | 0.28742515 | 0.48850575 | 0.28742515 | 0.488505747 |             |           | 0.4772727 |
| ENSG00000204283 |            | 0.10795455 |            | 0.107954545 |             |           | 0.2159091 |
| ENSG00000196405 | 0.31137725 | 0.23939394 | 0.31137725 | 0.239393939 |             |           | 0.4360465 |
| ENSG00000152463 |            | 0.42682927 |            | 0.426829268 |             |           | 0.3488372 |
| ENSG00000102181 |            | 0.41515152 |            | 0.415151515 |             |           | 0.2411765 |
| ENSG00000136167 | 0.2994012  | 0.42424242 | 0.2994012  | 0.424242424 | 0.321428571 | 0.3023256 | 0.4825581 |
| ENSG00000106266 | 0.44578313 |            | 0.44578313 |             | 0.125       | 0.1627907 |           |
| ENSG00000197747 | 0.0508982  |            | 0.0508982  |             |             |           |           |
| ENSG00000051382 |            | 0.17977528 |            | 0.179775281 |             |           |           |
| ENSG00000159199 | 0.49700599 |            | 0.49700599 |             | 0.119047619 | 0.1802326 |           |
| ENSG00000205334 |            | 0.2195122  |            | 0.219512195 |             |           | 0.4360465 |
| ENSG00000138081 |            | 0.05757576 |            | 0.057575758 |             |           |           |
| ENSG00000158486 |            | 0.44242424 |            | 0.442424242 |             |           | 0.4244186 |
| ENSG00000101096 |            | 0.48333333 |            | 0.483333333 |             |           | 0.4011628 |
| ENSG00000107643 |            | 0.48888889 |            | 0.488888889 |             |           | 0.3095238 |
| ENSG00000089327 |            | 0.39263804 |            | 0.392638037 |             |           | 0.2616279 |
| ENSG00000116329 |            | 0.44817073 |            | 0.448170732 |             |           | 0.1860465 |
| ENSG00000196911 |            | 0.23006135 |            | 0.23006135  |             |           | 0.4069767 |
| ENSG00000168484 |            | 0.28787879 |            | 0.287878788 |             |           | 0.4318182 |
| ENSG00000105127 |            | 0.26190476 |            | 0.261904762 |             |           |           |
| ENSG00000110344 |            | 0.14939024 |            | 0.149390244 |             | 0.0813953 | 0.4534884 |
| ENSG00000187170 | 0.08333333 |            | 0.08333333 |             | 0.122222222 |           |           |
| ENSG00000050426 | 0.45808383 | 0.44848485 | 0.45808383 | 0.448484848 | 0.363095238 | 0.2674419 | 0.3197674 |
| ENSG00000188375 |            | 0.17977528 |            | 0.179775281 |             |           | 0.2034884 |
| ENSG00000165617 |            | 0.2        |            | 0.2         |             |           | 0.1590909 |

|                 |            |            |            |             |             |           |           |
|-----------------|------------|------------|------------|-------------|-------------|-----------|-----------|
| ENSG00000196616 |            | 0.496875   |            | 0.496875    |             |           | 0.2613636 |
| ENSG00000172322 |            | 0.3757764  |            | 0.375776398 |             |           | 0.2151163 |
| ENSG00000197647 | 0.1257485  |            | 0.1257485  |             |             |           |           |
| ENSG00000117069 |            | 0.07012195 |            | 0.070121951 |             |           | 0.3895349 |
| ENSG00000150457 | 0.37777778 | 0.30909091 | 0.37777778 | 0.309090909 | 0.433333333 | 0.4886364 | 0.2034884 |
| ENSG00000120729 |            | 0.17272727 |            | 0.172727273 |             |           | 0.3255814 |
| ENSG00000187678 |            | 0.36111111 |            | 0.361111111 | 0.30952381  | 0.377907  | 0.4090909 |
| ENSG00000221988 | 0.05988024 |            | 0.05988024 |             |             |           |           |
| ENSG00000134146 |            | 0.26829268 |            | 0.268292683 |             |           | 0.3863636 |
| ENSG00000165805 |            | 0.10555556 |            | 0.105555556 |             |           |           |
| ENSG00000106628 | 0.15963855 |            | 0.15963855 |             | 0.232142857 | 0.2034884 |           |
| ENSG00000170959 | 0.13473054 | 0.36666667 | 0.13473054 | 0.366666667 | 0.125       | 0.0872093 | 0.4302326 |
| ENSG00000104472 |            | 0.20555556 |            | 0.205555556 |             |           | 0.1666667 |
| ENSG00000157856 |            | 0.15151515 |            | 0.151515152 |             | 0.122093  | 0.1395349 |
| ENSG00000157227 |            | 0.48780488 |            | 0.487804878 |             |           | 0.494186  |
| ENSG00000203907 | 0.48850575 |            | 0.48850575 |             | 0.211111111 | 0.2954545 |           |
| ENSG00000143228 | 0.17222222 | 0.20496894 | 0.17222222 | 0.204968944 | 0.088888889 | 0.0888889 |           |
| ENSG00000130770 |            | 0.34848485 |            | 0.348484848 |             |           | 0.4186047 |
| ENSG00000066405 |            | 0.45       |            | 0.45        | 0.232142857 | 0.3313953 | 0.3295455 |
| ENSG00000187559 | 0.16352201 |            | 0.16352201 |             |             |           |           |
| ENSG00000124678 | 0.26946108 | 0.14848485 | 0.26946108 | 0.148484848 | 0.166666667 | 0.255814  | 0.1046512 |
| ENSG00000171033 | 0.05151515 | 0.16060606 | 0.05151515 | 0.160606061 |             |           | 0.127907  |
| ENSG00000152223 |            | 0.4030303  |            | 0.403030303 |             |           | 0.4825581 |
| ENSG00000108375 |            | 0.40606061 |            | 0.406060606 |             |           | 0.2906977 |
| ENSG00000103154 |            | 0.42682927 |            | 0.426829268 |             |           | 0.4882353 |
| ENSG00000112308 |            | 0.37025316 |            | 0.370253165 | 0.166666667 | 0.122093  | 0.1744186 |
| ENSG00000213676 |            | 0.27575758 |            | 0.275757576 |             |           | 0.2906977 |
| ENSG00000101224 | 0.09580838 | 0.10493827 | 0.09580838 | 0.104938272 | 0.311111111 | 0.2272727 |           |
| ENSG00000188785 | 0.37724551 | 0.19753086 | 0.37724551 | 0.197530864 | 0.05952381  | 0.0697674 | 0.0641026 |
| ENSG00000139517 |            | 0.14634146 |            | 0.146341463 | 0.088888889 | 0.1       | 0.2333333 |
| ENSG00000186871 |            | 0.28527607 |            | 0.285276074 |             |           | 0.4883721 |
| ENSG00000138772 | 0.0748503  | 0.31402439 | 0.0748503  | 0.31402439  |             |           | 0.3895349 |
| ENSG00000141570 |            | 0.28484848 |            | 0.284848485 |             |           | 0.1802326 |
| ENSG00000089012 |            | 0.27906977 |            | 0.279069767 |             |           | 0.3081395 |
| ENSG00000063515 |            |            |            |             |             |           | 0.4651163 |
| ENSG00000138346 | 0.37724551 | 0.33636364 | 0.37724551 | 0.336363636 | 0.136904762 | 0.1104651 | 0.2093023 |
| ENSG00000113070 |            | 0.47272727 |            | 0.472727273 |             |           | 0.4360465 |
| ENSG00000228594 |            | 0.20606061 |            | 0.206060606 |             |           | 0.2325581 |
| ENSG00000182768 |            | 0.09202454 |            | 0.09202454  |             |           |           |
| ENSG00000133247 |            | 0.42424242 |            | 0.424242424 |             |           | 0.2616279 |
| ENSG00000138463 | 0.18333333 | 0.23030303 | 0.18333333 | 0.23030303  |             |           | 0.2647059 |
| ENSG00000012174 |            | 0.33231707 |            | 0.332317073 |             |           | 0.4186047 |
| ENSG00000153071 | 0.32634731 | 0.45151515 | 0.32634731 | 0.451515152 | 0.311111111 | 0.2965116 | 0.2732558 |
| ENSG00000171130 |            | 0.4030303  |            | 0.403030303 | 0.222222222 | 0.2926829 | 0.375     |
| ENSG00000100092 | 0.45731707 | 0.1030303  | 0.45731707 | 0.103030303 | 0.234939759 | 0.313253  |           |
| ENSG00000112941 |            | 0.32727273 |            | 0.327272727 |             |           | 0.3837209 |
| ENSG00000156284 |            | 0.15151515 |            | 0.151515152 |             |           | 0.3953488 |
| ENSG00000198911 | 0.23652695 | 0.1030303  | 0.23652695 | 0.103030303 | 0.148809524 | 0.3117647 | 0.0697674 |
| ENSG00000010818 | 0.27777778 | 0.34969325 | 0.27777778 | 0.349693252 |             |           | 0.2034884 |
| ENSG00000145757 |            | 0.35151515 |            | 0.351515152 |             |           | 0.3333333 |
| ENSG00000139410 | 0.21176471 |            | 0.21176471 |             |             |           |           |
| ENSG00000204710 | 0.0988024  |            | 0.0988024  |             | 0.119047619 | 0.0988372 |           |
| ENSG00000087206 | 0.12727273 | 0.48780488 | 0.12727273 | 0.487804878 | 0.481481481 | 0.494186  | 0.4709302 |
| ENSG00000110074 | 0.48192771 | 0.22988506 | 0.48192771 | 0.229885057 |             |           | 0.3863636 |



|                 |            |            |            |             |             |           |           |
|-----------------|------------|------------|------------|-------------|-------------|-----------|-----------|
| ENSG00000103479 |            | 0.38787879 |            | 0.387878788 |             |           | 0.1176471 |
| ENSG00000213246 |            | 0.48787879 |            | 0.487878788 |             |           | 0.255814  |
| ENSG00000101343 | 0.40718563 |            | 0.40718563 |             | 0.279761905 | 0.4418605 | 0.4651163 |
| ENSG00000116194 |            | 0.38414634 |            | 0.384146341 |             |           | 0.4294118 |
| ENSG00000185104 | 0.11377246 | 0.1        | 0.11377246 | 0.1         |             |           | 0.0697674 |
| ENSG00000196083 |            | 0.2804878  |            | 0.280487805 |             |           | 0.4888889 |
| ENSG00000115919 | 0.11235955 | 0.09509202 | 0.11235955 | 0.095092025 |             |           | 0.2619048 |
| ENSG00000166743 |            | 0.16666667 |            | 0.166666667 |             |           | 0.3662791 |
| ENSG00000144460 |            | 0.41158537 |            | 0.411585366 |             |           | 0.4534884 |
| ENSG00000160255 |            | 0.28787879 |            | 0.287878788 | 0.285714286 | 0.2965116 | 0.2906977 |
| ENSG00000186973 | 0.2183908  |            | 0.2183908  |             | 0.273809524 |           | 0.3023256 |
| ENSG00000135315 | 0.20555556 |            | 0.20555556 |             |             |           |           |
| ENSG00000147613 |            | 0.34969325 |            | 0.349693252 |             |           | 0.4302326 |
| ENSG00000169035 | 0.47590361 |            | 0.47590361 |             | 0.432926829 | 0.4882353 |           |
| ENSG00000168811 |            | 0.1402439  |            | 0.140243902 |             |           | 0.1506024 |
| ENSG00000187054 | 0.47904192 | 0.42727273 | 0.47904192 | 0.427272727 | 0.5         | 0.4186047 | 0.375     |
| ENSG00000255394 |            | 0.43333333 |            | 0.433333333 |             |           | 0.4883721 |
| ENSG00000136144 |            | 0.45833333 |            | 0.458333333 |             |           | 0.4352941 |
| ENSG00000188133 |            | 0.29393939 |            | 0.293939394 |             |           | 0.0697674 |
| ENSG00000153006 | 0.19318182 | 0.44444444 | 0.19318182 | 0.444444444 | 0.488888889 | 0.4545455 | 0.4431818 |
| ENSG00000103274 |            | 0.19393939 |            | 0.193939394 |             |           | 0.3313953 |
| ENSG00000107447 |            | 0.13333333 |            | 0.133333333 |             |           | 0.0639535 |
| ENSG00000111331 | 0.48181818 | 0.3803681  | 0.48181818 | 0.380368098 | 0.325301205 | 0.1511628 | 0.4069767 |
| ENSG00000168300 |            | 0.30113636 |            | 0.301136364 |             |           | 0.3846154 |
| ENSG00000005339 | 0.28443114 | 0.27272727 | 0.28443114 | 0.272727273 | 0.220238095 | 0.0813953 | 0.3255814 |
| ENSG00000120656 | 0.21257485 |            | 0.21257485 |             |             |           |           |
| ENSG00000130021 |            | 0.42682927 |            | 0.426829268 |             |           | 0.3953488 |
| ENSG00000255730 | 0.18862275 |            | 0.18862275 |             | 0.470238095 | 0.4825581 |           |
| ENSG00000151806 |            | 0.3902439  |            | 0.390243902 |             |           | 0.4176471 |
| ENSG00000124593 |            | 0.47878788 |            | 0.478787879 | 0.273809524 | 0.1337209 | 0.3647059 |
| ENSG00000118454 | 0.07777778 |            | 0.07777778 |             |             |           |           |
| ENSG00000100650 |            |            |            |             | 0.160714286 | 0.1337209 |           |
| ENSG00000059769 |            | 0.12424242 |            | 0.124242424 |             |           | 0.4823529 |
| ENSG00000037749 | 0.48502994 | 0.37777778 | 0.48502994 | 0.377777778 | 0.30952381  | 0.2831325 | 0.1590909 |
| ENSG00000175104 |            | 0.14367816 |            | 0.143678161 |             |           | 0.4534884 |
| ENSG00000100504 |            | 0.33636364 |            | 0.336363636 |             |           | 0.4302326 |
| ENSG00000134910 | 0.37125749 |            | 0.37125749 |             | 0.102409639 | 0.1235294 |           |
| ENSG00000214140 |            | 0.19318182 |            | 0.193181818 |             |           | 0.1477273 |
| ENSG00000100483 |            | 0.40555556 |            | 0.405555556 |             |           | 0.2682927 |
| ENSG00000166863 |            |            |            |             | 0.122222222 | 0.1022727 |           |
| ENSG00000127337 |            |            |            |             | 0.307228916 | 0.3023256 |           |
| ENSG00000213402 | 0.08682635 |            | 0.08682635 |             | 0.31547619  | 0.2616279 |           |
| ENSG00000182180 |            | 0.05       |            | 0.05        |             |           | 0.3181818 |
| ENSG00000004139 |            | 0.45757576 |            | 0.457575758 |             |           | 0.2267442 |
| ENSG00000106608 | 0.24850299 | 0.33636364 | 0.24850299 | 0.336363636 | 0.289156627 | 0.3546512 | 0.3430233 |
| ENSG00000143578 | 0.38622754 |            | 0.38622754 |             | 0.05952381  | 0.0697674 |           |
| ENSG00000138378 |            | 0.4030303  |            | 0.403030303 |             |           | 0.2209302 |
| ENSG00000087586 | 0.3502994  | 0.22699387 | 0.3502994  | 0.226993865 |             |           | 0.3705882 |
| ENSG00000215012 |            | 0.3        |            | 0.3         |             |           | 0.4244186 |
| ENSG00000170571 |            | 0.47752809 |            | 0.47752809  |             |           | 0.3488372 |
| ENSG00000166135 | 0.13473054 | 0.2030303  | 0.13473054 | 0.203030303 | 0.148809524 | 0.2034884 | 0.1453488 |
| ENSG00000259141 |            | 0.14545455 |            | 0.145454545 |             |           | 0.3895349 |
| ENSG00000186866 |            | 0.38650307 |            | 0.386503067 |             |           | 0.4011628 |
| ENSG00000203993 | 0.34131737 |            | 0.34131737 |             | 0.077380952 | 0.1162791 |           |

|                 |            |            |            |             |             |  |                     |
|-----------------|------------|------------|------------|-------------|-------------|--|---------------------|
| ENSG00000131263 |            | 0.08588957 |            | 0.085889571 |             |  |                     |
| ENSG00000142208 | 0.38343558 |            | 0.38343558 |             | 0.084337349 |  | 0.126506            |
| ENSG00000145979 |            | 0.11111111 |            | 0.11111111  |             |  | 0.5                 |
| ENSG00000011201 |            | 0.46111111 |            | 0.46111111  |             |  | 0.3333333           |
| ENSG00000100401 | 0.34730539 | 0.40909091 | 0.34730539 | 0.409090909 | 0.244047619 |  | 0.2267442           |
| ENSG00000175206 |            | 0.13030303 |            | 0.13030303  |             |  |                     |
| ENSG00000145293 | 0.26946108 |            | 0.26946108 |             | 0.083333333 |  | 0.0813953 0.127907  |
| ENSG00000133961 | 0.19444444 | 0.25757576 | 0.19444444 | 0.257575758 |             |  | 0.2333333           |
| ENSG00000159228 |            | 0.41818182 |            | 0.418181818 |             |  | 0.3555556           |
| ENSG00000146872 |            | 0.31111111 |            | 0.31111111  |             |  | 0.2674419           |
| ENSG00000134352 |            | 0.10555556 |            | 0.10555556  |             |  |                     |
| ENSG00000127948 | 0.33333333 | 0.35151515 | 0.33333333 | 0.351515152 | 0.465116279 |  | 0.4418605 0.3604651 |
| ENSG00000150361 |            | 0.15740741 |            | 0.157407407 |             |  |                     |
| ENSG00000164197 |            | 0.30898876 |            | 0.308988764 |             |  | 0.1627907           |
| ENSG00000137648 |            | 0.39090909 |            | 0.390909091 |             |  | 0.3546512           |
| ENSG00000021461 |            | 0.12727273 |            | 0.127272727 |             |  |                     |
| ENSG00000106686 | 0.06024096 | 0.22916667 | 0.06024096 | 0.229166667 |             |  | 0.494186            |
| ENSG00000177733 |            | 0.2030303  |            | 0.203030303 |             |  | 0.0523256           |
| ENSG00000175892 |            | 0.30606061 |            | 0.306060606 |             |  | 0.4882353           |
| ENSG00000162585 | 0.44011976 | 0.41212121 | 0.44011976 | 0.412121212 | 0.31547619  |  | 0.1931818 0.1931818 |
| ENSG00000198785 |            | 0.46666667 |            | 0.466666667 |             |  | 0.2965116           |
| ENSG00000149922 |            |            |            |             | 0.450617284 |  | 0.4111111           |
| ENSG00000135747 | 0.21987952 | 0.44252874 | 0.21987952 | 0.442528736 | 0.101190476 |  | 0.1511628 0.5       |
| ENSG00000196335 | 0.49401198 |            | 0.49401198 |             | 0.398809524 |  | 0.3430233           |
| ENSG00000175229 |            | 0.18333333 |            | 0.183333333 |             |  |                     |
| ENSG00000175193 |            | 0.49444444 |            | 0.494444444 |             |  | 0.4772727           |
| ENSG00000167491 |            | 0.37272727 |            | 0.372727273 |             |  | 0.2732558           |
| ENSG00000143476 |            | 0.41463415 |            | 0.414634146 | 0.05952381  |  | 0.3430233           |
| ENSG00000106367 |            | 0.43333333 |            | 0.433333333 |             |  | 0.4404762           |
| ENSG00000164651 | 0.06287425 |            | 0.06287425 |             | 0.363095238 |  | 0.3953488           |
| ENSG00000149380 |            | 0.17272727 |            | 0.172727273 |             |  | 0.2848837           |
| ENSG00000133812 |            | 0.39393939 |            | 0.393939394 |             |  | 0.3647059           |
| ENSG00000141867 |            | 0.48787879 |            | 0.487878788 |             |  | 0.3764706           |
| ENSG00000187017 |            | 0.10909091 |            | 0.109090909 |             |  |                     |
| ENSG00000124208 |            | 0.33146067 |            | 0.331460674 |             |  | 0.2613636           |
| ENSG00000198270 | 0.31024096 | 0.19090909 | 0.31024096 | 0.190909091 | 0.304878049 |  | 0.2235294 0.2235294 |
| ENSG00000205084 |            | 0.23333333 |            | 0.233333333 |             |  | 0.244186            |
| ENSG00000165066 |            | 0.41463415 |            | 0.414634146 |             |  | 0.3139535           |
| ENSG00000104972 |            | 0.15243902 |            | 0.152439024 |             |  |                     |
| ENSG00000177963 |            | 0.16091954 |            | 0.16091954  |             |  | 0.4651163           |
| ENSG00000179921 | 0.2005988  |            | 0.2005988  |             | 0.421686747 |  | 0.4011628           |
| ENSG00000119787 |            | 0.32777778 |            | 0.327777778 |             |  | 0.1860465           |
| ENSG00000166396 | 0.33333333 | 0.49438202 | 0.33333333 | 0.494382022 | 0.4         |  | 0.3295455 0.4642857 |
| ENSG00000197991 | 0.40662651 | 0.32716049 | 0.40662651 | 0.327160494 | 0.470238095 |  | 0.4360465 0.3941176 |
| ENSG00000181896 |            |            |            |             | 0.233333333 |  | 0.0909091           |
| ENSG00000205213 |            | 0.38181818 |            | 0.381818182 |             |  | 0.3546512           |
| ENSG00000144619 | 0.26047904 | 0.48295455 | 0.26047904 | 0.482954545 |             |  | 0.4518072           |
| ENSG00000168427 |            | 0.44478528 |            | 0.444785276 |             |  | 0.3117647           |
| ENSG00000236287 | 0.06287425 |            | 0.06287425 |             |             |  |                     |
| ENSG00000115648 | 0.27222222 | 0.13888889 | 0.27222222 | 0.138888889 | 0.244444444 |  | 0.2093023 0.5       |
| ENSG00000122482 |            | 0.12727273 |            | 0.127272727 |             |  | 0.0523256           |
| ENSG00000137713 |            | 0.38414634 |            | 0.384146341 |             |  | 0.1686047           |
| ENSG00000189306 |            | 0.19318182 |            | 0.193181818 |             |  | 0.3181818           |
| ENSG00000204540 | 0.30538922 | 0.21515152 | 0.30538922 | 0.215151515 | 0.369047619 |  | 0.4593023 0.3023256 |

|                 |            |            |            |             |             |  |           |           |
|-----------------|------------|------------|------------|-------------|-------------|--|-----------|-----------|
| ENSG00000155366 | 0.4251497  |            | 0.4251497  |             | 0.327380952 |  | 0.3604651 |           |
| ENSG00000187902 |            | 0.5        |            | 0.5         |             |  |           | 0.2058824 |
| ENSG00000255408 |            | 0.05151515 |            | 0.051515152 |             |  |           | 0.1162791 |
| ENSG00000155833 |            | 0.37272727 |            | 0.372727273 |             |  |           | 0.1453488 |
| ENSG00000144331 |            | 0.1        |            | 0.1         |             |  |           | 0.4651163 |
| ENSG00000204300 |            | 0.46604938 |            | 0.466049383 |             |  |           | 0.4823529 |
| ENSG00000188931 |            | 0.06666667 |            | 0.06666667  |             |  |           | 0.3058824 |
| ENSG00000112701 | 0.26666667 | 0.33888889 | 0.26666667 | 0.338888889 | 0.188888889 |  | 0.1818182 | 0.313253  |
| ENSG00000198455 |            | 0.18787879 |            | 0.187878788 |             |  |           | 0.2588235 |
| ENSG00000144589 | 0.38023952 |            | 0.38023952 |             |             |  |           |           |
| ENSG00000164164 |            | 0.45402299 |            | 0.454022989 |             |  |           | 0.3888889 |
| ENSG00000152760 |            | 0.34756098 |            | 0.347560976 |             |  |           | 0.0813953 |
| ENSG00000166548 | 0.45454545 |            | 0.45454545 |             | 0.355555556 |  | 0.1931818 | 0.1569767 |
| ENSG00000142937 | 0.34730539 |            | 0.34730539 |             | 0.470238095 |  | 0.494186  |           |
| ENSG00000198753 | 0.0873494  |            | 0.0873494  |             |             |  |           |           |
| ENSG00000241399 |            | 0.41768293 |            | 0.417682927 |             |  |           | 0.4011628 |
| ENSG00000105501 |            | 0.05454545 |            | 0.054545455 |             |  |           | 0.1       |
| ENSG00000083307 |            | 0.41463415 |            | 0.414634146 |             |  | 0.0795455 | 0.4069767 |
| ENSG00000160298 |            | 0.42592593 |            | 0.425925926 |             |  |           | 0.3588235 |
| ENSG00000172123 | 0.30113636 |            | 0.30113636 |             | 0.303571429 |  | 0.1976744 |           |
| ENSG00000178860 |            | 0.28333333 |            | 0.283333333 |             |  |           | 0.255814  |
| ENSG00000187773 |            | 0.40606061 |            | 0.406060606 |             |  |           | 0.5       |
| ENSG00000122180 | 0.47839506 |            | 0.47839506 |             | 0.481707317 |  | 0.4647059 |           |
| ENSG00000186684 |            | 0.46060606 |            | 0.460606061 |             |  |           | 0.2965116 |
| ENSG00000147485 |            | 0.25151515 |            | 0.251515152 |             |  |           | 0.1162791 |
| ENSG00000142677 |            | 0.43081761 |            | 0.43081761  |             |  |           | 0.2325581 |
| ENSG00000184545 |            | 0.43030303 |            | 0.43030303  |             |  |           | 0.4431818 |
| ENSG00000049860 | 0.24550898 |            | 0.24550898 |             | 0.196428571 |  | 0.3058824 |           |
| ENSG00000008853 | 0.41616766 | 0.4        | 0.41616766 | 0.4         | 0.101190476 |  | 0.2093023 | 0.494186  |
| ENSG00000196597 | 0.45555556 |            | 0.45555556 |             | 0.311111111 |  | 0.3409091 | 0.3197674 |
| ENSG00000100968 | 0.43712575 | 0.33939394 | 0.43712575 | 0.339393939 | 0.25        |  | 0.3081395 | 0.4534884 |
| ENSG00000205593 |            | 0.05345912 |            | 0.053459119 |             |  |           |           |
| ENSG00000198945 |            | 0.11515152 |            | 0.115151515 |             |  |           |           |
| ENSG00000171469 | 0.17365269 | 0.17272727 | 0.17365269 | 0.172727273 |             |  |           |           |
| ENSG00000152767 | 0.05747126 | 0.36666667 | 0.05747126 | 0.366666667 |             |  |           | 0.2848837 |
| ENSG00000144580 | 0.21341463 |            | 0.21341463 |             | 0.25        |  | 0.2764706 | 0.125     |
| ENSG00000132003 |            | 0.2969697  |            | 0.296969697 |             |  |           | 0.2790698 |
| ENSG00000167850 |            |            |            |             | 0.446428571 |  | 0.4186047 |           |
| ENSG00000151468 | 0.06586826 | 0.33636364 | 0.06586826 | 0.336363636 | 0.375       |  | 0.2848837 | 0.2790698 |
| ENSG00000177200 |            | 0.26687117 |            | 0.266871166 |             |  |           | 0.3012048 |
| ENSG00000162407 |            | 0.48170732 |            | 0.481707317 |             |  |           | 0.4883721 |
| ENSG00000113971 | 0.13888889 | 0.13939394 | 0.13888889 | 0.139393939 | 0.088888889 |  |           | 0.3255814 |
| ENSG00000177800 |            | 0.28963415 |            | 0.289634146 | 0.226190476 |  | 0.1627907 | 0.3430233 |
| ENSG00000187231 |            | 0.30909091 |            | 0.309090909 |             |  |           | 0.2619048 |
| ENSG00000113739 |            |            |            |             |             |  |           | 0.0988372 |
| ENSG00000138653 |            | 0.12777778 |            | 0.127777778 |             |  |           | 0.2325581 |
| ENSG00000164385 | 0.15568862 | 0.20606061 | 0.15568862 | 0.206060606 | 0.214285714 |  | 0.2034884 | 0.255814  |
| ENSG00000167635 | 0.19760479 |            | 0.19760479 |             |             |  |           |           |
| ENSG00000147535 | 0.12777778 |            | 0.12777778 |             | 0.333333333 |  | 0.3372093 |           |
| ENSG00000184381 | 0.10909091 | 0.41666667 | 0.10909091 | 0.416666667 | 0.130952381 |  | 0.122093  | 0.4709302 |
| ENSG00000131196 |            | 0.17272727 |            | 0.172727273 |             |  |           | 0.1453488 |
| ENSG00000137171 | 0.41017964 | 0.12121212 | 0.41017964 | 0.121212121 | 0.208333333 |  | 0.2383721 | 0.244186  |
| ENSG00000119630 |            | 0.17073171 |            | 0.170731707 |             |  |           | 0.2       |
| ENSG00000101247 |            | 0.32727273 |            | 0.327272727 |             |  |           | 0.4767442 |



|                 |            |            |            |             |             |           |           |
|-----------------|------------|------------|------------|-------------|-------------|-----------|-----------|
| ENSG00000196700 |            | 0.11111111 |            | 0.11111111  |             |           |           |
| ENSG00000198930 |            | 0.43209877 |            | 0.432098765 |             |           | 0.2857143 |
| ENSG00000233539 |            | 0.25757576 |            | 0.257575758 |             |           | 0.4302326 |
| ENSG00000185920 | 0.17241379 | 0.26704545 | 0.17241379 | 0.267045455 | 0.136363636 | 0.1395349 | 0.3837209 |
| ENSG00000225683 |            | 0.38636364 |            | 0.386363636 |             |           | 0.4767442 |
| ENSG00000005001 |            | 0.22988506 |            | 0.229885057 |             |           | 0.0681818 |
| ENSG00000089639 |            | 0.27878788 |            | 0.278787879 |             |           | 0.1337209 |
| ENSG00000102837 | 0.15361446 | 0.5        | 0.15361446 | 0.5         | 0.178571429 | 0.2209302 | 0.4709302 |
| ENSG00000152433 | 0.26111111 | 0.46060606 | 0.26111111 | 0.460606061 | 0.266666667 | 0.3409091 | 0.3255814 |
| ENSG00000036828 |            | 0.36060606 |            | 0.360606061 |             |           | 0.4411765 |
| ENSG00000188243 |            | 0.28235294 |            | 0.282352941 | 0.077777778 | 0.0777778 | 0.1590909 |
| ENSG00000100403 |            | 0.26060606 |            | 0.260606061 |             |           | 0.375     |
| ENSG00000236301 | 0.31818182 | 0.3969697  | 0.31818182 | 0.396969697 | 0.44047619  | 0.3488372 | 0.297619  |
| ENSG00000150672 | 0.28742515 | 0.36060606 | 0.28742515 | 0.360606061 | 0.066666667 | 0.1888889 | 0.2616279 |
| ENSG00000188677 | 0.45205479 | 0.38787879 | 0.45205479 | 0.387878788 | 0.182926829 | 0.1686747 | 0.2616279 |
| ENSG00000187260 |            |            |            |             |             |           | 0.0581395 |
| ENSG00000135220 |            | 0.35057471 |            | 0.350574713 |             |           | 0.3977273 |
| ENSG00000101049 | 0.25149701 | 0.1554878  | 0.25149701 | 0.155487805 | 0.344444444 | 0.2222222 | 0.2619048 |
| ENSG00000171435 |            | 0.42073171 |            | 0.420731707 |             |           | 0.1686047 |
| ENSG00000174292 |            | 0.12121212 |            | 0.121212121 |             |           | 0.3372093 |
| ENSG00000197933 |            | 0.47204969 |            | 0.472049689 |             |           | 0.3823529 |
| ENSG00000229619 |            | 0.07272727 |            | 0.072727273 |             |           |           |
| ENSG00000068903 |            | 0.35365854 |            | 0.353658537 |             |           | 0.4011628 |
| ENSG00000168002 |            | 0.23636364 |            | 0.236363636 |             |           | 0.1802326 |
| ENSG00000198917 |            | 0.18787879 |            | 0.187878788 |             |           | 0.2732558 |
| ENSG00000197724 |            | 0.38787879 |            | 0.387878788 |             |           | 0.2965116 |
| ENSG00000163960 |            | 0.48181818 |            | 0.481818182 |             |           | 0.1222222 |
| ENSG00000122515 |            | 0.49393939 |            | 0.493939394 |             |           | 0.1860465 |
| ENSG00000138623 |            | 0.06179775 |            | 0.061797753 |             |           | 0.127907  |
| ENSG00000204103 |            | 0.11212121 |            | 0.112121212 |             |           |           |
| ENSG00000183549 | 0.49401198 | 0.24390244 | 0.49401198 | 0.243902439 | 0.083333333 | 0.0872093 | 0.1569767 |
| ENSG00000163607 | 0.12275449 |            | 0.12275449 |             | 0.347560976 | 0.3863636 |           |
| ENSG00000009307 | 0.12921348 | 0.19090909 | 0.12921348 | 0.190909091 |             |           | 0.0930233 |
| ENSG00000132153 | 0.49401198 |            | 0.49401198 |             | 0.240963855 | 0.2529412 |           |
| ENSG00000162494 |            | 0.38181818 |            | 0.381818182 |             |           | 0.4186047 |
| ENSG00000138294 | 0.20426829 |            | 0.20426829 |             |             |           |           |
| ENSG00000165672 |            | 0.41818182 |            | 0.418181818 |             |           | 0.3977273 |
| ENSG00000205978 |            | 0.28181818 |            | 0.281818182 |             |           | 0.4883721 |
| ENSG00000196208 | 0.19161677 | 0.49090909 | 0.19161677 | 0.490909091 | 0.476190476 | 0.4940476 | 0.4360465 |
| ENSG00000206043 | 0.46407186 | 0.40506329 | 0.46407186 | 0.405063291 | 0.43452381  | 0.4593023 | 0.5       |
| ENSG00000167130 |            |            |            |             | 0.19047619  | 0.255814  | 0.1627907 |
| ENSG00000234438 |            | 0.46060606 |            | 0.460606061 |             |           | 0.1976744 |
| ENSG00000185231 |            | 0.48484848 |            | 0.484848485 |             |           | 0.4883721 |
| ENSG00000168264 |            | 0.31707317 |            | 0.317073171 |             |           | 0.3072289 |
| ENSG00000108576 | 0.30722892 | 0.40606061 | 0.30722892 | 0.406060606 | 0.136904762 | 0.1162791 | 0.1860465 |
| ENSG00000130764 |            | 0.46646341 |            | 0.466463415 |             |           | 0.1104651 |
| ENSG00000093217 | 0.28143713 | 0.4        | 0.28143713 | 0.4         |             |           | 0.5       |
| ENSG00000182150 | 0.45808383 | 0.31402439 | 0.45808383 | 0.31402439  | 0.333333333 | 0.422619  | 0.377907  |
| ENSG00000182177 | 0.32934132 | 0.11515152 | 0.32934132 | 0.115151515 | 0.232142857 | 0.122093  |           |
| ENSG00000143322 |            | 0.46666667 |            | 0.466666667 |             |           | 0.4555556 |
| ENSG00000163746 | 0.18862275 | 0.33333333 | 0.18862275 | 0.333333333 | 0.351190476 | 0.4534884 | 0.2267442 |
| ENSG00000240184 |            | 0.20224719 |            | 0.202247191 |             |           | 0.1477273 |
| ENSG00000101892 |            | 0.39393939 |            | 0.393939394 |             |           | 0.3430233 |
| ENSG00000134899 | 0.3502994  | 0.42424242 | 0.3502994  | 0.424242424 | 0.380952381 | 0.3647059 | 0.4764706 |

|                 |            |            |            |             |             |           |           |
|-----------------|------------|------------|------------|-------------|-------------|-----------|-----------|
| ENSG00000164220 |            | 0.49695122 |            | 0.49695122  |             |           | 0.3953488 |
| ENSG0000052841  |            |            |            |             |             |           | 0.0666667 |
| ENSG00000186666 |            | 0.11818182 |            | 0.118181818 |             |           |           |
| ENSG00000115556 |            | 0.40606061 |            | 0.406060606 | 0.119047619 | 0.127907  | 0.2352941 |
| ENSG00000123609 |            | 0.43030303 |            | 0.43030303  |             |           | 0.3511905 |
| ENSG00000143278 |            | 0.38484848 |            | 0.384848485 |             |           | 0.1764706 |
| ENSG00000125510 | 0.46407186 | 0.08181818 | 0.46407186 | 0.081818182 | 0.410714286 | 0.372093  |           |
| ENSG00000255212 |            | 0.21515152 |            | 0.215151515 |             |           | 0.3430233 |
| ENSG00000197128 |            | 0.38787879 |            | 0.387878788 |             |           | 0.3630952 |
| ENSG00000115685 |            | 0.20909091 |            | 0.209090909 | 0.226190476 | 0.2093023 | 0.3571429 |
| ENSG00000141527 | 0.47005988 | 0.37878788 | 0.47005988 | 0.378787879 | 0.172619048 | 0.244186  | 0.3255814 |
| ENSG00000186205 |            | 0.13888889 |            | 0.138888889 |             |           | 0.2732558 |
| ENSG00000110811 | 0.13173653 | 0.47839506 | 0.13173653 | 0.478395062 | 0.44047619  | 0.4651163 | 0.4146341 |
| ENSG00000140285 |            | 0.44545455 |            | 0.445454545 |             |           | 0.472973  |
| ENSG00000027644 |            | 0.12068966 |            | 0.120689655 |             |           | 0.1477273 |
| ENSG00000124429 |            | 0.11212121 |            | 0.112121212 |             |           | 0.4069767 |
| ENSG00000128052 | 0.39102564 |            | 0.39102564 |             | 0.284090909 | 0.2790698 |           |
| ENSG00000162771 | 0.29041916 |            | 0.29041916 |             | 0.44047619  | 0.4709302 |           |
| ENSG00000152092 |            | 0.36363636 |            | 0.363636364 |             |           | 0.3313953 |
| ENSG00000042445 |            | 0.4127907  |            | 0.412790698 |             |           | 0.4431818 |
| ENSG00000177453 | 0.34831461 |            | 0.34831461 |             | 0.186746988 | 0.2666667 |           |
| ENSG00000135472 | 0.19461078 | 0.36363636 | 0.19461078 | 0.363636364 | 0.297619048 | 0.3235294 | 0.372093  |
| ENSG00000126777 | 0.27325581 |            | 0.27325581 |             | 0.395348837 | 0.3888889 |           |
| ENSG00000155465 | 0.49700599 | 0.13030303 | 0.49700599 | 0.13030303  | 0.44047619  | 0.4651163 | 0.1104651 |
| ENSG00000152147 | 0.31437126 | 0.05757576 | 0.31437126 | 0.057575758 | 0.154761905 | 0.122093  | 0.3255814 |
| ENSG00000149305 |            | 0.20909091 |            | 0.209090909 |             |           | 0.1627907 |
| ENSG00000173915 | 0.23652695 |            | 0.23652695 |             | 0.398809524 | 0.4767442 |           |
| ENSG00000204842 | 0.28333333 | 0.19393939 | 0.28333333 | 0.193939394 | 0.452380952 | 0.4418605 | 0.4431818 |
| ENSG00000133119 |            | 0.07575758 |            | 0.075757576 |             |           | 0.3430233 |
| ENSG00000131080 |            | 0.15757576 |            | 0.157575758 |             |           |           |
| ENSG00000102882 |            | 0.11666667 |            | 0.116666667 |             |           |           |
| ENSG00000090989 |            | 0.15644172 |            | 0.156441718 |             |           | 0.4883721 |
| ENSG00000259075 |            | 0.35582822 |            | 0.355828221 |             |           | 0.1802326 |
| ENSG00000143811 |            | 0.14545455 |            | 0.145454545 |             |           | 0.0930233 |
| ENSG00000103126 | 0.17964072 | 0.21818182 | 0.17964072 | 0.218181818 | 0.113095238 | 0.1046512 | 0.1162791 |
| ENSG00000143158 |            | 0.23888889 |            | 0.238888889 |             |           | 0.0909091 |
| ENSG00000183283 | 0.47005988 | 0.18125    | 0.47005988 | 0.18125     | 0.327380952 | 0.3430233 | 0.4352941 |
| ENSG00000181924 | 0.26966292 |            | 0.26966292 |             | 0.193181818 | 0.125     |           |
| ENSG00000165097 |            | 0.21779141 |            | 0.217791411 |             |           | 0.1686747 |
| ENSG00000166509 |            | 0.46666667 |            | 0.466666667 |             |           | 0.4404762 |
| ENSG00000188167 |            | 0.22865854 |            | 0.228658537 |             |           | 0.0581395 |
| ENSG00000169862 | 0.38323353 | 0.38484848 | 0.38323353 | 0.384848485 | 0.398809524 | 0.4244186 | 0.494186  |
| ENSG00000100142 |            | 0.34242424 |            | 0.342424242 |             |           | 0.3372093 |
| ENSG00000187474 | 0.2994012  | 0.33333333 | 0.2994012  | 0.333333333 | 0.267857143 | 0.122093  | 0.4772727 |
| ENSG00000021776 | 0.44879518 | 0.46666667 | 0.44879518 | 0.466666667 | 0.053571429 |           | 0.2888889 |
| ENSG00000183423 | 0.45209581 | 0.16768293 | 0.45209581 | 0.167682927 | 0.494047619 | 0.4709302 | 0.3433735 |
| ENSG00000158863 |            | 0.45       |            | 0.45        |             |           | 0.3977273 |
| ENSG00000136943 |            | 0.13414634 |            | 0.134146341 |             |           | 0.4235294 |
| ENSG00000177669 |            | 0.37222222 |            | 0.372222222 |             |           | 0.2       |
| ENSG00000144426 |            |            |            |             |             |           | 0.0755814 |
| ENSG00000003393 |            | 0.1        |            | 0.1         |             |           | 0.2352941 |
| ENSG00000127564 | 0.44886364 |            | 0.44886364 |             | 0.202380952 | 0.2267442 |           |
| ENSG00000184887 |            | 0.26060606 |            | 0.260606061 |             |           | 0.1511628 |
| ENSG00000171450 |            | 0.05757576 |            | 0.057575758 |             |           |           |

|                 |            |            |            |             |             |           |           |
|-----------------|------------|------------|------------|-------------|-------------|-----------|-----------|
| ENSG00000148719 |            |            |            |             |             |           | 0.0697674 |
| ENSG00000172578 |            | 0.47191011 |            | 0.471910112 |             |           | 0.2325581 |
| ENSG00000006459 |            | 0.37222222 |            | 0.372222222 |             |           | 0.3444444 |
| ENSG00000117859 | 0.21856287 | 0.16363636 | 0.21856287 | 0.163636364 | 0.261904762 | 0.2383721 | 0.0941176 |
| ENSG00000204267 | 0.42777778 | 0.3        | 0.42777778 | 0.3         | 0.4         | 0.4431818 | 0.4186047 |
| ENSG00000149735 |            | 0.2969697  |            | 0.296969697 |             |           | 0.4418605 |
| ENSG00000173852 |            | 0.3006135  |            | 0.300613497 |             |           | 0.1158537 |
| ENSG00000111801 |            |            |            |             |             | 0.0705882 | 0.127907  |
| ENSG00000186314 |            | 0.15151515 |            | 0.151515152 |             |           | 0.25      |
| ENSG00000112679 |            | 0.41666667 |            | 0.416666667 |             |           | 0.2222222 |
| ENSG00000007237 |            | 0.4969697  |            | 0.496969697 | 0.11875     | 0.1666667 | 0.4939759 |
| ENSG00000130023 |            |            |            |             | 0.43452381  |           | 0.4534884 |
| ENSG00000232196 | 0.11111111 | 0.33522727 | 0.11111111 | 0.335227273 |             |           | 0.1931818 |
| ENSG00000165188 | 0.5        | 0.3258427  | 0.5        | 0.325842697 | 0.458333333 | 0.4186047 | 0.0595238 |
| ENSG00000177807 |            | 0.36666667 |            | 0.366666667 |             |           | 0.3372093 |
| ENSG00000196268 |            | 0.30606061 |            | 0.306060606 |             |           | 0.2613636 |
| ENSG00000110693 | 0.17065868 | 0.44848485 | 0.17065868 | 0.448484848 |             |           | 0.4302326 |
| ENSG00000171195 | 0.33832335 | 0.48787879 | 0.33832335 | 0.487878788 | 0.154761905 | 0.0930233 | 0.3375    |
| ENSG00000163793 |            | 0.20606061 |            | 0.206060606 |             |           | 0.0697674 |
| ENSG00000102996 |            | 0.38484848 |            | 0.384848485 |             |           | 0.4709302 |
| ENSG00000205111 |            |            |            |             |             |           | 0.1744186 |
| ENSG00000128274 |            | 0.34242424 |            | 0.342424242 |             |           | 0.4476744 |
| ENSG00000143369 | 0.11676647 |            | 0.11676647 |             |             |           |           |
| ENSG00000198829 |            | 0.48136646 |            | 0.48136646  |             |           | 0.313253  |
| ENSG00000149679 |            | 0.43636364 |            | 0.436363636 |             |           | 0.0930233 |
| ENSG00000140854 | 0.21385542 | 0.22121212 | 0.21385542 | 0.221212121 |             |           | 0.0813953 |
| ENSG00000125775 | 0.29213483 | 0.38888889 | 0.29213483 | 0.388888889 |             | 0.0813953 | 0.4882353 |
| ENSG00000181007 |            | 0.2969697  |            | 0.296969697 |             |           | 0.3604651 |
| ENSG00000165606 |            | 0.09202454 |            | 0.09202454  |             |           |           |
| ENSG00000032742 | 0.22777778 | 0.17378049 | 0.22777778 | 0.173780488 | 0.411111111 | 0.2790698 |           |
| ENSG00000136807 |            | 0.35060976 |            | 0.350609756 |             |           | 0.4011628 |
| ENSG00000125676 |            | 0.35632184 |            | 0.356321839 |             |           | 0.2272727 |
| ENSG00000184371 |            | 0.43103448 |            | 0.431034483 |             |           | 0.4204545 |
| ENSG00000142765 | 0.33233533 | 0.3136646  | 0.33233533 | 0.313664596 |             |           | 0.255814  |
| ENSG00000105982 |            | 0.5        |            | 0.5         |             |           | 0.5       |
| ENSG00000235978 | 0.36526946 |            | 0.36526946 |             | 0.133333333 | 0.0930233 |           |
| ENSG00000259133 | 0.08083832 |            | 0.08083832 |             | 0.142857143 | 0.1453488 |           |
| ENSG00000100678 | 0.25149701 | 0.29090909 | 0.25149701 | 0.290909091 | 0.333333333 | 0.3372093 | 0.4709302 |
| ENSG00000131323 |            | 0.14848485 |            | 0.148484848 |             |           | 0.3529412 |
| ENSG00000179772 | 0.46629213 |            | 0.46629213 |             |             |           |           |
| ENSG00000173083 |            | 0.3        |            | 0.3         |             |           | 0.1802326 |
| ENSG00000117834 |            | 0.17575758 |            | 0.175757576 |             |           | 0.2151163 |
| ENSG00000125999 |            | 0.47222222 |            | 0.472222222 |             |           | 0.1704545 |
| ENSG00000169245 |            | 0.5        |            | 0.5         |             |           | 0.0588235 |
| ENSG00000124535 |            | 0.33939394 |            | 0.339393939 |             |           | 0.4       |
| ENSG00000143858 |            | 0.44242424 |            | 0.442424242 |             |           | 0.5       |
| ENSG00000057657 |            | 0.05555556 |            | 0.055555556 |             |           | 0.0813953 |
| ENSG00000186509 | 0.2125     | 0.35454545 | 0.2125     | 0.354545455 |             |           | 0.1627907 |
| ENSG00000142751 | 0.07185629 | 0.4068323  | 0.07185629 | 0.406832298 |             |           |           |
| ENSG00000181619 |            | 0.32317073 |            | 0.323170732 |             |           | 0.1511628 |
| ENSG00000174021 | 0.48295455 |            | 0.48295455 |             | 0.18452381  | 0.1976744 |           |
| ENSG00000064547 |            | 0.38181818 |            | 0.381818182 |             |           | 0.4360465 |
| ENSG00000006652 | 0.49404762 | 0.46036585 | 0.49404762 | 0.460365854 | 0.2         | 0.1511628 | 0.2209302 |
| ENSG00000163319 | 0.48203593 | 0.45121951 | 0.48203593 | 0.451219512 |             |           | 0.375     |

|                 |            |            |            |             |             |           |           |
|-----------------|------------|------------|------------|-------------|-------------|-----------|-----------|
| ENSG00000125814 |            | 0.33939394 |            | 0.339393939 |             |           | 0.3255814 |
| ENSG00000163431 | 0.35329341 | 0.35454545 | 0.35329341 | 0.354545455 |             |           | 0.0697674 |
| ENSG00000148841 | 0.29341317 | 0.36363636 | 0.29341317 | 0.363636364 | 0.214285714 | 0.2588235 | 0.255814  |
| ENSG00000198963 |            | 0.07954545 |            | 0.079545455 |             |           | 0.3488372 |
| ENSG00000189060 |            | 0.26969697 |            | 0.26969697  |             |           | 0.494186  |
| ENSG00000070413 | 0.27222222 | 0.41463415 | 0.27222222 | 0.414634146 | 0.397727273 | 0.3295455 | 0.4047619 |
| ENSG00000120709 |            | 0.34545455 |            | 0.345454545 |             |           | 0.5       |
| ENSG00000138107 |            | 0.43939394 |            | 0.439393939 |             |           | 0.3809524 |
| ENSG00000112186 | 0.14371257 | 0.40909091 | 0.14371257 | 0.409090909 | 0.125       | 0.1337209 | 0.25      |
| ENSG00000156959 | 0.33636364 |            | 0.33636364 |             | 0.494047619 | 0.4302326 |           |
| ENSG00000123080 | 0.08682635 | 0.0969697  | 0.08682635 | 0.096969697 | 0.133333333 | 0.1136364 | 0.0813953 |
| ENSG00000198952 |            | 0.46666667 |            | 0.466666667 |             |           | 0.4058824 |
| ENSG00000189283 |            | 0.39090909 |            | 0.390909091 |             |           | 0.1976744 |
| ENSG00000166441 | 0.18562874 | 0.45454545 | 0.18562874 | 0.454545455 |             | 0.0647059 | 0.3255814 |
| ENSG00000140749 |            | 0.12727273 |            | 0.127272727 |             |           | 0.2176471 |
| ENSG00000115084 | 0.48484848 | 0.42121212 | 0.48484848 | 0.421212121 | 0.455555556 | 0.3181818 | 0.3111111 |
| ENSG00000102934 |            | 0.1        |            | 0.1         |             |           | 0.3139535 |
| ENSG00000179546 |            | 0.33333333 |            | 0.333333333 |             |           | 0.244186  |
| ENSG00000250565 | 0.45180723 | 0.33030303 | 0.45180723 | 0.33030303  | 0.160714286 | 0.1860465 | 0.372093  |
| ENSG00000173145 | 0.10778443 | 0.11666667 | 0.10778443 | 0.116666667 |             |           |           |
| ENSG00000101019 |            | 0.33333333 |            | 0.333333333 |             |           | 0.2674419 |
| ENSG00000138111 | 0.32335329 | 0.45426829 | 0.32335329 | 0.454268293 | 0.345238095 | 0.3902439 | 0.4588235 |
| ENSG00000055955 | 0.24850299 |            | 0.24850299 |             | 0.494047619 | 0.3888889 |           |
| ENSG00000157368 | 0.24157303 |            | 0.24157303 |             | 0.488888889 | 0.4090909 | 0.2613636 |
| ENSG00000258735 |            | 0.43167702 |            | 0.431677019 |             |           | 0.4642857 |
| ENSG00000183454 |            | 0.46060606 |            | 0.460606061 |             |           | 0.5       |
| ENSG00000172638 |            | 0.45454545 |            | 0.454545455 |             |           | 0.25      |
| ENSG00000205464 |            |            |            |             | 0.056818182 |           |           |
| ENSG00000149527 |            | 0.3        |            | 0.3         |             |           |           |
| ENSG00000213809 |            | 0.28735632 |            | 0.287356322 |             |           | 0.3522727 |
| ENSG00000198042 | 0.32098765 | 0.37777778 | 0.32098765 | 0.377777778 | 0.430232558 | 0.4558824 | 0.4767442 |
| ENSG00000165168 |            | 0.09393939 |            | 0.093939394 |             |           |           |
| ENSG00000143622 | 0.34659091 | 0.27575758 | 0.34659091 | 0.275757576 | 0.088888889 | 0.0795455 | 0.2616279 |
| ENSG00000173960 |            | 0.24242424 |            | 0.242424242 |             |           | 0.0930233 |
| ENSG00000163681 | 0.16766467 | 0.39090909 | 0.16766467 | 0.390909091 | 0.488095238 | 0.4593023 | 0.4940476 |
| ENSG00000173369 | 0.3030303  |            | 0.3030303  |             | 0.348837209 | 0.2613636 |           |
| ENSG00000118307 | 0.13772455 | 0.39329268 | 0.13772455 | 0.393292683 | 0.279761905 | 0.1941176 | 0.1941176 |
| ENSG00000165156 | 0.17777778 |            | 0.17777778 |             |             |           |           |
| ENSG00000079385 | 0.37724551 | 0.08695652 | 0.37724551 | 0.086956522 | 0.06547619  | 0.0581395 | 0.2151163 |
| ENSG00000105668 |            | 0.44444444 |            | 0.444444444 |             |           | 0.4534884 |
| ENSG00000213171 |            | 0.3969697  |            | 0.396969697 |             |           | 0.4476744 |
| ENSG00000153558 | 0.25449102 | 0.41139241 | 0.25449102 | 0.411392405 | 0.089285714 | 0.0930233 | 0.3941176 |
| ENSG00000127838 |            | 0.43636364 |            | 0.436363636 |             |           | 0.3197674 |
| ENSG00000224916 |            | 0.48181818 |            | 0.481818182 |             |           | 0.4756098 |
| ENSG00000198964 |            | 0.47878788 |            | 0.478787879 | 0.079268293 | 0.1529412 | 0.255814  |
| ENSG00000085733 |            | 0.29573171 |            | 0.295731707 |             |           | 0.0581395 |
| ENSG00000051180 | 0.26436782 | 0.45757576 | 0.26436782 | 0.457575758 | 0.133333333 | 0.1463415 | 0.1704545 |
| ENSG00000173210 | 0.43413174 | 0.44545455 | 0.43413174 | 0.445454545 | 0.404761905 | 0.4825581 | 0.4767442 |
| ENSG00000106443 |            |            |            |             |             |           | 0.1190476 |
| ENSG00000019186 |            | 0.18787879 |            | 0.187878788 |             |           | 0.4156627 |
| ENSG00000179528 | 0.17088608 | 0.1097561  | 0.17088608 | 0.109756098 |             |           | 0.1764706 |
| ENSG00000177994 |            | 0.27439024 |            | 0.274390244 |             |           | 0.3372093 |
| ENSG00000116521 | 0.5        |            | 0.5        |             | 0.244047619 | 0.255814  |           |
| ENSG00000177683 | 0.08383234 | 0.46969697 | 0.08383234 | 0.46969697  | 0.494047619 | 0.5       | 0.3953488 |

|                 |            |            |            |             |             |           |           |
|-----------------|------------|------------|------------|-------------|-------------|-----------|-----------|
| ENSG00000165699 |            | 0.42727273 |            | 0.427272727 |             |           | 0.4709302 |
| ENSG00000186111 |            | 0.40909091 |            | 0.409090909 |             |           | 0.4825581 |
| ENSG00000213614 | 0.42814371 |            | 0.42814371 |             | 0.095238095 | 0.1704545 | 0.3662791 |
| ENSG00000120253 | 0.43113772 | 0.34242424 | 0.43113772 | 0.342424242 | 0.238095238 | 0.2383721 | 0.2202381 |
| ENSG00000112761 | 0.27586207 | 0.23939394 | 0.27586207 | 0.239393939 | 0.377777778 | 0.2727273 | 0.2616279 |
| ENSG00000140807 |            | 0.35151515 |            | 0.351515152 |             |           | 0.3372093 |
| ENSG00000164465 | 0.46407186 | 0.45151515 | 0.46407186 | 0.451515152 | 0.142857143 | 0.0523256 | 0.4534884 |
| ENSG00000076641 | 0.2245509  | 0.07575758 | 0.2245509  | 0.075757576 | 0.463855422 | 0.4882353 | 0.1511628 |
| ENSG00000107679 | 0.13333333 | 0.43902439 | 0.13333333 | 0.43902439  | 0.177777778 | 0.2256098 | 0.1918605 |
| ENSG00000165799 | 0.24251497 | 0.32121212 | 0.24251497 | 0.321212121 | 0.345238095 | 0.4069767 | 0.3372093 |
| ENSG00000070159 | 0.48502994 |            | 0.48502994 |             | 0.277777778 |           | 0.3333333 |
| ENSG00000165443 | 0.17777778 | 0.18333333 | 0.17777778 | 0.183333333 |             |           | 0.2045455 |
| ENSG00000165821 |            | 0.28484848 |            | 0.284848485 |             |           | 0.2267442 |
| ENSG00000132581 |            | 0.25151515 |            | 0.251515152 |             |           | 0.1395349 |
| ENSG00000168970 |            | 0.48295455 |            | 0.482954545 |             |           | 0.3139535 |
| ENSG00000154493 | 0.34730539 | 0.29393939 | 0.34730539 | 0.293939394 | 0.363095238 | 0.4418605 | 0.3       |
| ENSG00000103222 | 0.24251497 | 0.38888889 | 0.24251497 | 0.388888889 | 0.452380952 | 0.4302326 | 0.2965116 |
| ENSG00000128609 | 0.05988024 | 0.28409091 | 0.05988024 | 0.284090909 |             |           | 0.4069767 |
| ENSG00000254528 |            | 0.40909091 |            | 0.409090909 |             |           | 0.25      |
| ENSG00000135423 |            | 0.19207317 |            | 0.192073171 |             |           | 0.1       |
| ENSG00000108813 |            | 0.14848485 |            | 0.148484848 |             |           | 0.3546512 |
| ENSG00000211584 | 0.20783133 | 0.16363636 | 0.20783133 | 0.163636364 | 0.355421687 | 0.372093  | 0.3488372 |
| ENSG00000006659 |            | 0.24444444 |            | 0.244444444 |             |           | 0.125     |
| ENSG00000072080 |            | 0.05151515 |            | 0.051515152 |             |           |           |
| ENSG00000089692 | 0.23053892 |            | 0.23053892 |             |             |           |           |
| ENSG00000119986 | 0.23006135 |            | 0.23006135 |             | 0.43452381  | 0.4069767 |           |
| ENSG00000125740 |            | 0.37575758 |            | 0.375757576 |             |           | 0.2151163 |
| ENSG00000122122 |            | 0.39444444 |            | 0.394444444 |             |           | 0.1136364 |
| ENSG00000176136 | 0.20958084 | 0.16060606 | 0.20958084 | 0.160606061 | 0.25        | 0.2209302 | 0.4186047 |
| ENSG00000005302 |            |            |            |             |             |           | 0.1704545 |
| ENSG00000184909 |            | 0.42727273 |            | 0.427272727 |             |           | 0.4534884 |
| ENSG00000164306 | 0.20359281 | 0.19090909 | 0.20359281 | 0.190909091 |             |           |           |
| ENSG00000119403 | 0.19760479 | 0.32121212 | 0.19760479 | 0.321212121 | 0.177777778 | 0.125     | 0.4186047 |
| ENSG00000021488 | 0.39772727 | 0.15730337 | 0.39772727 | 0.157303371 | 0.422222222 | 0.4090909 | 0.2727273 |
| ENSG00000187398 |            | 0.49386503 |            | 0.493865031 |             |           | 0.2045455 |
| ENSG00000163017 | 0.49700599 | 0.46590909 | 0.49700599 | 0.465909091 | 0.398809524 | 0.4767442 | 0.4588235 |
| ENSG00000197594 |            | 0.24545455 |            | 0.245454545 |             |           | 0.4767442 |
| ENSG00000144820 | 0.10479042 |            | 0.10479042 |             |             |           |           |
| ENSG00000104064 | 0.44       | 0.11818182 | 0.44       | 0.118181818 | 0.348837209 | 0.3378378 |           |
| ENSG00000168824 | 0.46407186 | 0.0945122  | 0.46407186 | 0.094512195 | 0.398809524 | 0.4058824 | 0.0581395 |
| ENSG00000132911 |            | 0.20606061 |            | 0.206060606 |             |           |           |
| ENSG00000150967 | 0.4054878  | 0.11515152 | 0.4054878  | 0.115151515 | 0.428571429 | 0.3863636 | 0.1918605 |
| ENSG00000113712 |            | 0.18493151 |            | 0.184931507 |             |           | 0.2235294 |
| ENSG00000120885 | 0.15568862 | 0.17378049 | 0.15568862 | 0.173780488 | 0.411111111 | 0.4431818 | 0.3255814 |
| ENSG00000090581 |            | 0.06363636 |            | 0.063636364 |             |           |           |
| ENSG00000119326 |            | 0.05487805 |            | 0.054878049 |             |           |           |
| ENSG00000180257 |            | 0.37078652 |            | 0.370786517 |             |           | 0.3409091 |
| ENSG00000118849 |            | 0.18888889 |            | 0.188888889 |             |           | 0.2209302 |
| ENSG00000163923 | 0.1        |            | 0.1        |             |             |           |           |
| ENSG00000134716 |            |            |            |             |             |           | 0.1046512 |
| ENSG00000161277 |            | 0.33125    |            | 0.33125     | 0.255555556 | 0.1590909 | 0.4404762 |
| ENSG00000166233 |            | 0.07575758 |            | 0.075757576 |             |           | 0.1666667 |
| ENSG00000129810 |            | 0.35151515 |            | 0.351515152 |             |           | 0.0625    |
| ENSG00000185420 | 0.40555556 | 0.25153374 | 0.40555556 | 0.251533742 | 0.077777778 | 0.0909091 | 0.4529412 |

|                |            |            |            |             |             |           |           |
|----------------|------------|------------|------------|-------------|-------------|-----------|-----------|
| ENSG0000064218 | 0.24850299 | 0.46060606 | 0.24850299 | 0.460606061 | 0.267857143 | 0.3       | 0.4651163 |
| ENSG0000100603 |            | 0.46666667 |            | 0.466666667 |             |           | 0.3255814 |
| ENSG0000162522 |            | 0.16111111 |            | 0.161111111 |             |           | 0.2045455 |
| ENSG0000145113 |            | 0.5        |            | 0.5         |             |           | 0.3255814 |
| ENSG0000125734 | 0.12222222 |            | 0.12222222 |             | 0.122222222 |           |           |
| ENSG0000140497 |            | 0.39090909 |            | 0.390909091 |             |           | 0.4883721 |
| ENSG0000117707 | 0.23353293 |            | 0.23353293 |             | 0.416666667 | 0.4709302 | 0.0795455 |
| ENSG0000117385 |            | 0.35454545 |            | 0.354545455 |             |           | 0.4       |
| ENSG0000167106 |            | 0.08787879 |            | 0.087878788 |             |           | 0.4069767 |
| ENSG0000136634 |            | 0.4847561  |            | 0.484756098 |             |           |           |
| ENSG0000164754 | 0.36666667 | 0.46629213 | 0.36666667 | 0.466292135 | 0.202380952 | 0.1818182 | 0.1818182 |
| ENSG0000167985 |            | 0.15454545 |            | 0.154545455 |             |           |           |
| ENSG0000186522 | 0.3502994  |            | 0.3502994  |             |             | 0.0930233 | 0.25      |
| ENSG0000117036 |            | 0.1030303  |            | 0.103030303 |             |           | 0.4534884 |
| ENSG0000185989 |            | 0.46363636 |            | 0.463636364 |             |           | 0.2848837 |
| ENSG0000185722 |            | 0.13333333 |            | 0.133333333 |             |           | 0.3313953 |
| ENSG0000151694 |            | 0.47272727 |            | 0.472727273 |             |           |           |
| ENSG0000126261 | 0.48502994 |            | 0.48502994 |             | 0.19047619  | 0.127907  |           |
| ENSG0000177511 |            | 0.4695122  |            | 0.469512195 |             |           | 0.5       |
| ENSG0000116133 |            | 0.30606061 |            | 0.306060606 |             |           | 0.4659091 |
| ENSG0000173064 | 0.10240964 | 0.10909091 | 0.10240964 | 0.109090909 | 0.077380952 | 0.0988372 | 0.4090909 |
| ENSG0000173208 |            | 0.23030303 |            | 0.23030303  |             |           | 0.3488372 |
| ENSG0000188107 | 0.38787879 | 0.41573034 | 0.38787879 | 0.415730337 | 0.107142857 | 0.0882353 | 0.2777778 |
| ENSG0000214999 |            | 0.31818182 |            | 0.318181818 |             |           | 0.4111111 |
| ENSG0000103042 | 0.0508982  | 0.3        | 0.0508982  | 0.3         |             |           | 0.0909091 |
| ENSG0000139266 |            | 0.25304878 |            | 0.25304878  |             |           | 0.1511628 |
| ENSG0000177875 |            | 0.39090909 |            | 0.390909091 |             |           | 0.4235294 |
| ENSG0000112130 | 0.35227273 | 0.34242424 | 0.35227273 | 0.342424242 | 0.244444444 | 0.2840909 | 0.1918605 |
| ENSG0000164463 |            | 0.29573171 |            | 0.295731707 |             |           | 0.2195122 |
| ENSG0000137876 | 0.44242424 | 0.22560976 | 0.44242424 | 0.225609756 | 0.192771084 | 0.0872093 | 0.0882353 |
| ENSG0000138795 |            | 0.15757576 |            | 0.157575758 |             |           |           |
| ENSG0000183862 |            | 0.12068966 |            | 0.120689655 |             |           | 0.1470588 |
| ENSG0000110060 | 0.44886364 |            | 0.44886364 |             | 0.066666667 | 0.1818182 |           |
| ENSG0000258744 |            | 0.20909091 |            | 0.209090909 |             |           | 0.1627907 |
| ENSG0000163312 | 0.39820359 |            | 0.39820359 |             |             |           |           |
| ENSG0000125966 |            | 0.38109756 |            | 0.381097561 |             |           | 0.2470588 |
| ENSG0000153292 | 0.46666667 | 0.25454545 | 0.46666667 | 0.254545455 | 0.266666667 | 0.1590909 | 0.1976744 |
| ENSG0000168769 |            | 0.40909091 |            | 0.409090909 |             |           | 0.1976744 |
| ENSG0000178243 |            | 0.49411765 |            | 0.494117647 |             |           | 0.2368421 |
| ENSG0000122043 | 0.31437126 |            | 0.31437126 |             | 0.214285714 | 0.1453488 |           |
| ENSG0000150281 |            | 0.34782609 |            | 0.347826087 |             |           | 0.0988372 |
| ENSG0000160791 | 0.25149701 |            | 0.25149701 |             | 0.416666667 | 0.4883721 |           |
| ENSG0000110324 | 0.20958084 | 0.4969697  | 0.20958084 | 0.496969697 | 0.053571429 | 0.0697674 | 0.494186  |
| ENSG0000187045 | 0.13580247 |            | 0.13580247 |             | 0.284090909 | 0.4222222 |           |
| ENSG0000118418 |            | 0.10909091 |            | 0.109090909 |             |           |           |
| ENSG0000135638 |            | 0.246875   |            | 0.246875    |             |           | 0.1470588 |
| ENSG0000243710 | 0.125      | 0.41515152 | 0.125      | 0.415151515 |             |           | 0.3421053 |
| ENSG0000176473 | 0.46407186 | 0.45757576 | 0.46407186 | 0.457575758 | 0.397590361 | 0.4476744 | 0.3372093 |
| ENSG0000122126 |            | 0.27272727 |            | 0.272727273 |             |           | 0.3895349 |
| ENSG0000064655 |            | 0.5        |            | 0.5         |             |           | 0.494186  |
| ENSG0000081181 |            |            |            |             |             |           | 0.2045455 |
| ENSG0000140297 |            |            |            |             |             |           | 0.3313953 |
| ENSG0000162747 |            | 0.26404494 |            | 0.264044944 |             |           |           |
| ENSG0000118162 |            | 0.11890244 |            | 0.118902439 |             |           | 0.2267442 |



|                 |            |            |            |             |             |  |                     |
|-----------------|------------|------------|------------|-------------|-------------|--|---------------------|
| ENSG00000187994 | 0.33832335 |            | 0.33832335 |             | 0.428571429 |  | 0.3255814           |
| ENSG00000196440 | 0.34638554 | 0.26363636 | 0.34638554 | 0.263636364 | 0.095238095 |  | 0.0988372 0.4659091 |
| ENSG00000172819 | 0.44886364 | 0.11818182 | 0.44886364 | 0.118181818 | 0.188888889 |  | 0.2613636 0.0988372 |
| ENSG00000171428 | 0.06666667 | 0.25471698 | 0.06666667 | 0.254716981 | 0.363095238 |  | 0.4709302 0.4529412 |
| ENSG0000042286  |            | 0.15454545 |            | 0.154545455 |             |  | 0.4883721           |
| ENSG00000140153 |            | 0.20555556 |            | 0.20555556  |             |  | 0.1022727           |
| ENSG00000084731 |            | 0.26060606 |            | 0.260606061 |             |  | 0.0930233           |
| ENSG00000095485 | 0.20359281 |            | 0.20359281 |             | 0.107142857 |  | 0.0872093           |
| ENSG00000100353 | 0.06111111 |            | 0.06111111 |             |             |  |                     |
| ENSG00000185002 |            | 0.19393939 |            | 0.193939394 |             |  | 0.4186047           |
| ENSG00000019485 |            | 0.29573171 |            | 0.295731707 |             |  | 0.3313953           |
| ENSG00000100226 |            | 0.11212121 |            | 0.112121212 |             |  | 0.127907            |
| ENSG00000106366 |            | 0.43333333 |            | 0.433333333 |             |  | 0.4360465           |
| ENSG00000198301 |            | 0.41111111 |            | 0.411111111 |             |  | 0.2906977           |
| ENSG00000072571 | 0.07575758 |            | 0.07575758 |             | 0.279761905 |  | 0.244186            |
| ENSG00000100564 |            | 0.20121951 |            | 0.201219512 |             |  | 0.2093023           |
| ENSG00000258659 | 0.4491018  | 0.05757576 | 0.4491018  | 0.057575758 | 0.452380952 |  | 0.4825581           |
| ENSG00000196366 |            | 0.1993865  |            | 0.199386503 |             |  |                     |
| ENSG00000213523 | 0.25748503 |            | 0.25748503 |             | 0.404761905 |  | 0.5                 |
| ENSG00000254087 | 0.08282209 |            | 0.08282209 |             |             |  | 0.0639535           |
| ENSG00000137343 |            | 0.47575758 |            | 0.475757576 |             |  | 0.4069767           |
| ENSG00000161905 | 0.33532934 | 0.31212121 | 0.33532934 | 0.312121212 |             |  | 0.4069767           |
| ENSG00000120324 |            | 0.43939394 |            | 0.439393939 |             |  | 0.2732558           |
| ENSG00000151012 |            | 0.43636364 |            | 0.436363636 |             |  | 0.4593023           |
| ENSG00000183137 | 0.33832335 |            | 0.33832335 |             | 0.06547619  |  | 0.0639535           |
| ENSG00000090339 | 0.24137931 | 0.31515152 | 0.24137931 | 0.315151515 |             |  | 0.0639535           |
| ENSG00000139620 | 0.26047904 | 0.38484848 | 0.26047904 | 0.384848485 | 0.253012048 |  | 0.2790698 0.2790698 |
| ENSG00000102385 | 0.11280488 | 0.41358025 | 0.11280488 | 0.413580247 | 0.125       |  | 0.2674419           |
| ENSG00000185015 |            | 0.37272727 |            | 0.372727273 |             |  | 0.3823529           |
| ENSG00000124831 |            | 0.17575758 |            | 0.175757576 |             |  | 0.4186047           |
| ENSG00000105185 |            | 0.34444444 |            | 0.344444444 |             |  | 0.1022727           |
| ENSG00000221972 | 0.23353293 |            | 0.23353293 |             |             |  |                     |
| ENSG00000168887 |            | 0.08484848 |            | 0.084848485 |             |  |                     |
| ENSG00000160703 | 0.25449102 | 0.43939394 | 0.25449102 | 0.439393939 | 0.138554217 |  | 0.1764706 0.3197674 |
| ENSG00000136813 | 0.21987952 |            | 0.21987952 |             | 0.160714286 |  | 0.2117647 0.0909091 |
| ENSG00000113368 |            | 0.46969697 |            | 0.46969697  |             |  | 0.377907            |
| ENSG00000130830 |            | 0.27300613 |            | 0.273006135 |             |  | 0.1337209           |
| ENSG00000183977 | 0.46407186 |            | 0.46407186 |             | 0.19047619  |  | 0.1764706           |
| ENSG00000126461 |            | 0.26404494 |            | 0.264044944 |             |  |                     |
| ENSG00000101337 |            | 0.44242424 |            | 0.442424242 |             |  |                     |
| ENSG00000214013 |            | 0.11515152 |            | 0.115151515 |             |  | 0.1162791           |
| ENSG00000129946 |            | 0.26666667 |            | 0.266666667 |             |  | 0.4651163           |
| ENSG00000171858 |            | 0.19393939 |            | 0.193939394 |             |  | 0.377907            |
| ENSG00000134802 | 0.21856287 | 0.13636364 | 0.21856287 | 0.136363636 | 0.119047619 |  | 0.1162791           |
| ENSG00000197263 | 0.38855422 |            | 0.38855422 |             | 0.196428571 |  | 0.2891566           |
| ENSG00000130669 |            | 0.31818182 |            | 0.318181818 | 0.25        |  | 0.244186 0.3863636  |
| ENSG00000173517 |            | 0.37878788 |            | 0.378787879 |             |  | 0.4555556           |
| ENSG00000184979 | 0.18333333 |            | 0.18333333 |             |             |  | 0.1162791           |
| ENSG00000134765 |            | 0.05151515 |            | 0.051515152 |             |  |                     |
| ENSG00000185619 |            | 0.34242424 |            | 0.342424242 |             |  | 0.2093023           |
| ENSG00000111707 |            | 0.44242424 |            | 0.442424242 |             |  | 0.3081395           |
| ENSG00000189180 |            | 0.16060606 |            | 0.160606061 |             |  | 0.1686047           |
| ENSG00000258890 | 0.17575758 |            | 0.17575758 |             |             |  |                     |
| ENSG00000165202 |            | 0.41818182 |            | 0.418181818 |             |  | 0.4418605           |



|                 |            |            |            |             |             |  |                     |
|-----------------|------------|------------|------------|-------------|-------------|--|---------------------|
| ENSG00000107821 |            | 0.13636364 |            | 0.136363636 |             |  |                     |
| ENSG00000168256 | 0.41111111 |            | 0.41111111 |             | 0.155555556 |  | 0.1477273           |
| ENSG00000138449 | 0.37222222 | 0.38787879 | 0.37222222 | 0.387878788 | 0.133333333 |  | 0.1477273 0.1395349 |
| ENSG00000167261 | 0.47305389 |            | 0.47305389 |             | 0.107142857 |  | 0.1395349           |
| ENSG00000151491 | 0.23053892 | 0.15151515 | 0.23053892 | 0.151515152 | 0.054878049 |  | 0.0523256           |
| ENSG00000135378 |            | 0.49693252 |            | 0.496932515 |             |  | 0.4883721           |
| ENSG00000131095 |            | 0.16363636 |            | 0.163636364 |             |  | 0.2034884           |
| ENSG00000198518 |            | 0.45555556 |            | 0.455555556 |             |  | 0.1046512           |
| ENSG00000069329 |            |            |            |             | 0.077777778 |  |                     |
| ENSG00000130592 | 0.36969697 | 0.08484848 | 0.36969697 | 0.084848485 | 0.25        |  | 0.2647059           |
| ENSG00000122176 | 0.35625    | 0.46969697 | 0.35625    | 0.46969697  | 0.433333333 |  | 0.4222222 0.4176471 |
| ENSG00000136002 | 0.34444444 |            | 0.34444444 |             | 0.19047619  |  | 0.1337209           |
| ENSG00000175202 | 0.23619632 |            | 0.23619632 |             | 0.228395062 |  | 0.1976744           |
| ENSG00000104413 |            | 0.36280488 |            | 0.362804878 |             |  | 0.4767442           |
| ENSG00000171126 |            | 0.44545455 |            | 0.445454545 |             |  | 0.3941176           |
| ENSG00000232859 |            | 0.22424242 |            | 0.224242424 |             |  | 0.4882353           |
| ENSG00000189182 | 0.46107784 | 0.42424242 | 0.46107784 | 0.424242424 | 0.267857143 |  | 0.1511628 0.3488372 |
| ENSG00000089220 | 0.11746988 | 0.39329268 | 0.11746988 | 0.393292683 | 0.077380952 |  | 0.0581395 0.4127907 |
| ENSG00000131669 |            | 0.13888889 |            | 0.138888889 |             |  | 0.1590909           |
| ENSG00000196172 |            | 0.05       |            | 0.05        |             |  |                     |
| ENSG00000168904 |            | 0.27134146 |            | 0.271341463 |             |  | 0.3953488           |
| ENSG00000138246 |            | 0.24848485 |            | 0.248484848 |             |  | 0.1627907           |
| ENSG00000092529 | 0.2754491  |            | 0.2754491  |             | 0.113095238 |  | 0.1071429           |
| ENSG00000134533 | 0.47878788 | 0.12777778 | 0.47878788 | 0.127777778 | 0.246987952 |  | 0.3197674 0.1477273 |
| ENSG00000091164 | 0.40963855 | 0.43888889 | 0.40963855 | 0.438888889 | 0.303571429 |  | 0.3546512 0.4222222 |
| ENSG00000197548 |            | 0.42727273 |            | 0.427272727 |             |  | 0.3372093           |
| ENSG00000253200 | 0.43888889 | 0.31818182 | 0.43888889 | 0.318181818 | 0.366666667 |  | 0.3333333 0.3430233 |
| ENSG00000113805 |            | 0.25454545 |            | 0.254545455 |             |  | 0.2732558           |
| ENSG00000178573 |            | 0.33024691 |            | 0.330246914 |             |  | 0.3895349           |
| ENSG00000174744 | 0.09281437 |            | 0.09281437 |             |             |  |                     |
| ENSG00000106952 |            | 0.4030303  |            | 0.403030303 |             |  | 0.4821429           |
| ENSG00000138760 |            | 0.46060606 |            | 0.460606061 |             |  | 0.3414634           |
| ENSG00000174652 | 0.48863636 | 0.43333333 | 0.48863636 | 0.433333333 | 0.466666667 |  | 0.4090909 0.4294118 |
| ENSG00000148123 | 0.48888889 |            | 0.48888889 |             | 0.277777778 |  | 0.3636364           |
| ENSG00000128606 |            |            |            |             | 0.125       |  | 0.1337209           |
| ENSG00000156345 | 0.2245509  | 0.08536585 | 0.2245509  | 0.085365854 | 0.321428571 |  | 0.3197674 0.2705882 |
| ENSG00000147434 |            | 0.26363636 |            | 0.263636364 |             |  | 0.1511628           |
| ENSG00000103549 | 0.23652695 | 0.24085366 | 0.23652695 | 0.240853659 | 0.077380952 |  | 0.0988372 0.0872093 |
| ENSG00000089335 | 0.06586826 | 0.36969697 | 0.06586826 | 0.36969697  |             |  | 0.3953488           |
| ENSG00000185009 |            | 0.24545455 |            | 0.245454545 | 0.077777778 |  | 0.4464286           |
| ENSG00000205269 |            | 0.39090909 |            | 0.390909091 |             |  | 0.494186            |
| ENSG00000091106 | 0.24550898 |            | 0.24550898 |             | 0.428571429 |  | 0.4360465           |
| ENSG00000172345 |            | 0.4030303  |            | 0.403030303 |             |  | 0.4941176           |
| ENSG00000159842 | 0.08888889 | 0.3        | 0.08888889 | 0.3         | 0.355555556 |  | 0.3636364 0.4457831 |
| ENSG00000121486 |            | 0.38650307 |            | 0.386503067 |             |  | 0.4772727           |
| ENSG00000167723 |            | 0.45454545 |            | 0.454545455 |             |  | 0.2965116           |
| ENSG00000111790 | 0.06886228 | 0.17878788 | 0.06886228 | 0.178787879 |             |  | 0.1744186           |
| ENSG00000144061 |            | 0.31515152 |            | 0.315151515 |             |  | 0.3855422           |
| ENSG00000148343 | 0.35329341 |            | 0.35329341 |             | 0.142857143 |  | 0.1918605           |
| ENSG00000180447 | 0.0988024  |            | 0.0988024  |             |             |  |                     |
| ENSG00000197114 |            | 0.1030303  |            | 0.103030303 |             |  |                     |
| ENSG00000166197 | 0.38888889 | 0.48484848 | 0.38888889 | 0.484848485 |             |  | 0.3604651           |
| ENSG00000177674 |            | 0.32317073 |            | 0.323170732 |             |  | 0.2848837           |
| ENSG00000149090 | 0.44382022 | 0.44848485 | 0.44382022 | 0.448484848 | 0.5         |  | 0.4545455 0.3837209 |

|                 |            |            |            |             |             |  |           |
|-----------------|------------|------------|------------|-------------|-------------|--|-----------|
| ENSG00000221914 |            | 0.09393939 |            | 0.093939394 |             |  |           |
| ENSG00000186529 |            | 0.48765432 |            | 0.487654321 |             |  | 0.4777778 |
| ENSG00000117899 |            | 0.2        |            | 0.2         |             |  | 0.2674419 |
| ENSG00000138614 | 0.0748503  |            | 0.0748503  |             | 0.166666667 |  | 0.2882353 |
| ENSG00000164318 | 0.36227545 | 0.12195122 | 0.36227545 | 0.12195122  | 0.255952381 |  | 0.1823529 |
| ENSG00000172296 | 0.39221557 | 0.22699387 | 0.39221557 | 0.226993865 | 0.297619048 |  | 0.3895349 |
| ENSG00000197465 |            | 0.30909091 |            | 0.309090909 |             |  | 0.372093  |
| ENSG00000185105 |            | 0.30909091 |            | 0.309090909 |             |  | 0.377907  |
| ENSG00000144366 | 0.41477273 | 0.15030675 | 0.41477273 | 0.150306748 | 0.155555556 |  | 0.1931818 |
| ENSG00000106483 |            | 0.28181818 |            | 0.281818182 |             |  | 0.3235294 |
| ENSG00000186710 |            | 0.06402439 |            | 0.06402439  |             |  | 0.0930233 |
| ENSG00000125246 |            | 0.30337079 |            | 0.303370787 |             |  | 0.3823529 |
| ENSG00000180389 | 0.47904192 |            | 0.47904192 |             | 0.196428571 |  | 0.1511628 |
| ENSG00000166002 | 0.07228916 | 0.48255814 | 0.07228916 | 0.48255814  |             |  | 0.0568182 |
| ENSG00000157212 |            | 0.26666667 |            | 0.266666667 |             |  | 0.25      |
| ENSG00000127511 |            | 0.42528736 |            | 0.425287356 |             |  | 0.4318182 |
| ENSG00000197565 |            | 0.4054878  |            | 0.405487805 |             |  | 0.0647059 |
| ENSG00000103051 |            | 0.3969697  |            | 0.396969697 |             |  | 0.494186  |
| ENSG00000112139 |            | 0.47575758 |            | 0.475757576 |             |  | 0.4761905 |
| ENSG00000106348 |            | 0.25151515 |            | 0.251515152 |             |  | 0.3895349 |
| ENSG00000138685 |            | 0.49695122 |            | 0.49695122  |             |  | 0.4767442 |
| ENSG00000104687 |            | 0.40123457 |            | 0.401234568 |             |  | 0.2045455 |
| ENSG00000168333 |            | 0.48876404 |            | 0.488764045 |             |  | 0.3895349 |
| ENSG00000075856 | 0.2247191  | 0.13636364 | 0.2247191  | 0.136363636 | 0.277777778 |  | 0.2727273 |
| ENSG00000119862 |            | 0.30487805 |            | 0.304878049 |             |  | 0.1162791 |
| ENSG00000174749 |            | 0.43030303 |            | 0.43030303  |             |  | 0.2764706 |
| ENSG00000214290 | 0.07222222 | 0.41818182 | 0.07222222 | 0.418181818 |             |  | 0.1341463 |
| ENSG00000134058 |            |            |            |             | 0.226190476 |  | 0.4186047 |
| ENSG00000109738 |            | 0.44444444 |            | 0.444444444 |             |  | 0.1395349 |
| ENSG00000249647 |            | 0.46666667 |            | 0.466666667 |             |  | 0.4204545 |
| ENSG00000116260 |            | 0.28484848 |            | 0.284848485 |             |  | 0.3255814 |
| ENSG00000183172 | 0.4137931  |            | 0.4137931  |             | 0.2         |  | 0.5       |
| ENSG00000155592 |            | 0.43939394 |            | 0.439393939 |             |  | 0.1818182 |
| ENSG00000122861 |            | 0.37777778 |            | 0.377777778 |             |  | 0.4470588 |
| ENSG00000101236 |            | 0.49444444 |            | 0.494444444 |             |  | 0.125     |
| ENSG00000102048 | 0.45783133 | 0.21348315 | 0.45783133 | 0.213483146 | 0.277108434 |  | 0.3555556 |
| ENSG00000186020 | 0.2183908  | 0.16363636 | 0.2183908  | 0.163636364 | 0.222222222 |  | 0.3139535 |
| ENSG00000072422 | 0.39221557 | 0.12727273 | 0.39221557 | 0.127272727 | 0.196428571 |  | 0.2616279 |
| ENSG00000164509 | 0.47289157 | 0.26666667 | 0.47289157 | 0.266666667 | 0.43452381  |  | 0.1428571 |
| ENSG00000108840 |            | 0.5        |            | 0.5         |             |  | 0.2674419 |
| ENSG00000110077 | 0.32934132 | 0.46969697 | 0.32934132 | 0.46969697  | 0.30952381  |  | 0.0639535 |
| ENSG00000178623 | 0.40419162 | 0.27300613 | 0.40419162 | 0.273006135 | 0.366666667 |  | 0.4883721 |
| ENSG00000100916 |            | 0.10674157 |            | 0.106741573 |             |  | 0.1395349 |
| ENSG00000144857 | 0.22777778 | 0.20909091 | 0.22777778 | 0.209090909 | 0.322222222 |  | 0.4883721 |
| ENSG00000150893 |            | 0.49085366 |            | 0.490853659 |             |  | 0.1158537 |
| ENSG00000185610 |            | 0.44848485 |            | 0.448484848 |             |  | 0.2916667 |
| ENSG00000010244 |            | 0.48888889 |            | 0.488888889 |             |  | 0.2034884 |
| ENSG00000173598 |            | 0.22121212 |            | 0.221212121 |             |  | 0.1222222 |
| ENSG00000181240 |            | 0.34848485 |            | 0.348484848 |             |  | 0.3139535 |
| ENSG00000176988 |            |            |            |             |             |  | 0.4883721 |
| ENSG00000108061 |            |            |            |             |             |  | 0.1158537 |
| ENSG00000151461 |            | 0.07878788 |            | 0.078787879 |             |  | 0.2916667 |
| ENSG00000123095 |            | 0.4244186  |            | 0.424418605 |             |  | 0.1707317 |
| ENSG00000168495 |            | 0.43888889 |            | 0.438888889 |             |  | 0.4593023 |

|                 |            |            |            |             |             |  |           |           |
|-----------------|------------|------------|------------|-------------|-------------|--|-----------|-----------|
| ENSG00000136367 |            | 0.40909091 |            | 0.409090909 | 0.25        |  | 0.255814  | 0.3529412 |
| ENSG00000100285 |            | 0.38181818 |            | 0.381818182 |             |  |           | 0.1395349 |
| ENSG00000135632 | 0.16049383 |            | 0.16049383 |             |             |  |           |           |
| ENSG00000130810 | 0.0748503  |            | 0.0748503  |             |             |  |           |           |
| ENSG00000198399 |            | 0.33333333 |            | 0.333333333 |             |  |           | 0.1860465 |
| ENSG00000101280 |            | 0.11656442 |            | 0.116564417 |             |  |           | 0.127907  |
| ENSG00000230000 | 0.06097561 |            | 0.06097561 |             | 0.476190476 |  | 0.3837209 |           |
| ENSG00000116604 |            | 0.34269663 |            | 0.342696629 |             |  |           | 0.2840909 |
| ENSG00000141428 | 0.35928144 |            | 0.35928144 |             | 0.273809524 |  | 0.2674419 |           |
| ENSG00000171617 |            | 0.06060606 |            | 0.060606061 |             |  |           |           |
| ENSG00000101846 |            | 0.32389937 |            | 0.323899371 |             |  |           | 0.3529412 |
| ENSG00000221870 |            | 0.31707317 |            | 0.317073171 |             |  |           | 0.4695122 |
| ENSG00000115137 | 0.44011976 | 0.47865854 | 0.44011976 | 0.478658537 |             |  |           | 0.4882353 |
| ENSG00000055609 |            | 0.13803681 |            | 0.13803681  |             |  |           | 0.3117647 |
| ENSG00000173230 |            | 0.31818182 |            | 0.318181818 |             |  |           | 0.3953488 |
| ENSG00000144659 |            | 0.12359551 |            | 0.123595506 |             |  |           |           |
| ENSG00000168135 |            | 0.23636364 |            | 0.236363636 |             |  |           | 0.2790698 |
| ENSG00000102225 | 0.30120482 |            | 0.30120482 |             | 0.244047619 |  | 0.2705882 |           |
| ENSG00000164818 |            | 0.18292683 |            | 0.182926829 |             |  |           | 0.4647059 |
| ENSG00000100304 |            | 0.3969697  |            | 0.396969697 |             |  |           | 0.2613636 |
| ENSG00000162869 | 0.44886364 |            | 0.44886364 |             | 0.220238095 |  | 0.2616279 |           |
| ENSG00000114573 |            | 0.3030303  |            | 0.303030303 |             |  |           | 0.3139535 |
| ENSG00000147883 |            | 0.43292683 |            | 0.432926829 |             |  |           | 0.4176471 |
| ENSG00000115165 | 0.44444444 |            | 0.44444444 |             |             |  |           | 0.1136364 |
| ENSG00000161573 |            | 0.27575758 |            | 0.275757576 |             |  |           | 0.4825581 |
| ENSG00000156299 | 0.47305389 | 0.47852761 | 0.47305389 | 0.478527607 | 0.422222222 |  | 0.4545455 | 0.2882353 |
| ENSG00000120440 | 0.20958084 |            | 0.20958084 |             |             |  | 0.0882353 | 0.1       |
| ENSG00000078902 |            | 0.49386503 |            | 0.493865031 |             |  |           | 0.2674419 |
| ENSG00000183155 |            | 0.36363636 |            | 0.363636364 |             |  |           | 0.3095238 |
| ENSG00000198835 |            |            |            |             |             |  |           | 0.2034884 |
| ENSG00000104643 |            | 0.46666667 |            | 0.466666667 |             |  |           | 0.3197674 |
| ENSG00000182446 | 0.39820359 | 0.46551724 | 0.39820359 | 0.465517241 | 0.220238095 |  | 0.3023256 | 0.5       |
| ENSG00000139364 |            | 0.49393939 |            | 0.493939394 |             |  |           | 0.3197674 |
| ENSG00000213066 |            | 0.43888889 |            | 0.438888889 |             |  |           | 0.4418605 |
| ENSG00000136828 |            | 0.45555556 |            | 0.455555556 |             |  |           | 0.3522727 |
| ENSG00000171388 |            | 0.07926829 |            | 0.079268293 |             |  |           | 0.3430233 |
| ENSG00000035928 | 0.11077844 | 0.47222222 | 0.11077844 | 0.472222222 |             |  |           | 0.3095238 |
| ENSG00000175877 | 0.38622754 | 0.39393939 | 0.38622754 | 0.393939394 | 0.428571429 |  | 0.3882353 | 0.4302326 |
| ENSG00000133606 | 0.27245509 | 0.17857143 | 0.27245509 | 0.178571429 | 0.154761905 |  | 0.1976744 | 0.1931818 |
| ENSG00000141556 | 0.24850299 | 0.40606061 | 0.24850299 | 0.406060606 | 0.261904762 |  | 0.2209302 | 0.4302326 |
| ENSG00000162139 | 0.14156627 |            | 0.14156627 |             | 0.202380952 |  | 0.1987952 |           |
| ENSG00000128833 |            | 0.27011494 |            | 0.270114943 |             |  |           | 0.4825581 |
| ENSG00000103472 |            | 0.33888889 |            | 0.338888889 |             |  |           |           |
| ENSG00000116455 | 0.44311377 | 0.27777778 | 0.44311377 | 0.277777778 | 0.253012048 |  | 0.255814  | 0.1363636 |
| ENSG00000108094 |            | 0.2        |            | 0.2         |             |  |           | 0.1931818 |
| ENSG00000142166 |            | 0.25454545 |            | 0.254545455 |             |  |           |           |
| ENSG00000161847 |            | 0.21515152 |            | 0.215151515 |             |  |           | 0.0595238 |
| ENSG00000060971 |            | 0.15       |            | 0.15        |             |  |           | 0.2386364 |
| ENSG00000205856 |            | 0.35       |            | 0.35        |             |  |           | 0.1022727 |
| ENSG00000142408 |            | 0.34662577 |            | 0.346625767 |             |  |           | 0.2045455 |
| ENSG00000111684 |            | 0.07878788 |            | 0.078787879 |             |  |           | 0.0755814 |
| ENSG00000121454 | 0.11077844 | 0.30909091 | 0.11077844 | 0.309090909 |             |  |           | 0.4545455 |
| ENSG00000028839 |            | 0.07926829 |            | 0.079268293 |             |  |           |           |
| ENSG00000109572 | 0.14670659 | 0.47575758 | 0.14670659 | 0.475757576 |             |  |           | 0.2142857 |

|                 |            |            |            |             |             |           |           |
|-----------------|------------|------------|------------|-------------|-------------|-----------|-----------|
| ENSG00000100083 | 0.11976048 | 0.08333333 | 0.11976048 | 0.08333333  | 0.439759036 | 0.4705882 | 0.2848837 |
| ENSG00000118526 |            | 0.37575758 |            | 0.375757576 |             |           | 0.4593023 |
| ENSG00000136010 |            | 0.26219512 |            | 0.262195122 |             |           | 0.2888889 |
| ENSG00000071967 |            | 0.41818182 |            | 0.418181818 |             |           | 0.3953488 |
| ENSG00000006747 |            | 0.38109756 |            | 0.381097561 |             |           | 0.4518072 |
| ENSG00000134780 |            | 0.4030303  |            | 0.403030303 |             |           | 0.3411765 |
| ENSG00000102221 |            | 0.41818182 |            | 0.418181818 |             |           | 0.255814  |
| ENSG00000108306 |            | 0.26060606 |            | 0.260606061 |             |           | 0.1976744 |
| ENSG00000164406 | 0.47305389 | 0.29878049 | 0.47305389 | 0.298780488 | 0.476190476 | 0.4767442 | 0.4593023 |
| ENSG00000125337 | 0.38323353 | 0.06707317 | 0.38323353 | 0.067073171 | 0.255952381 | 0.2674419 | 0.2151163 |
| ENSG00000256980 | 0.38333333 | 0.47878788 | 0.38333333 | 0.478787879 | 0.3         | 0.2613636 | 0.372093  |
| ENSG00000167476 |            |            |            |             | 0.1         | 0.1363636 |           |
| ENSG00000161267 |            | 0.34242424 |            | 0.342424242 |             |           | 0.1337209 |
| ENSG00000144746 |            | 0.46666667 |            | 0.466666667 |             |           | 0.4360465 |
| ENSG00000113231 |            | 0.49693252 |            | 0.496932515 |             |           | 0.4302326 |
| ENSG00000197487 |            | 0.48333333 |            | 0.483333333 |             |           | 0.3546512 |
| ENSG00000160200 | 0.13333333 | 0.40909091 | 0.13333333 | 0.409090909 | 0.232142857 | 0.2906977 | 0.4709302 |
| ENSG00000105819 |            | 0.15243902 |            | 0.152439024 | 0.166666667 | 0.2083333 | 0.0813953 |
| ENSG00000095585 | 0.08682635 |            | 0.08682635 |             |             |           |           |
| ENSG00000134313 |            | 0.30909091 |            | 0.309090909 |             |           | 0.1860465 |
| ENSG00000165119 | 0.42222222 |            | 0.42222222 |             | 0.285714286 | 0.2588235 |           |
| ENSG00000064787 | 0.42814371 | 0.46060606 | 0.42814371 | 0.460606061 | 0.380952381 | 0.3430233 | 0.4709302 |
| ENSG00000135902 | 0.28977273 | 0.32121212 | 0.28977273 | 0.321212121 | 0.3         | 0.3977273 | 0.4659091 |
| ENSG00000042088 | 0.39520958 |            | 0.39520958 |             | 0.422222222 | 0.4090909 | 0.1       |
| ENSG00000147059 | 0.4760479  |            | 0.4760479  |             |             |           |           |
| ENSG00000137269 |            | 0.4969697  |            | 0.496969697 |             |           | 0.3081395 |
| ENSG00000167548 |            | 0.05454545 |            | 0.054545455 |             |           |           |
| ENSG00000064961 |            | 0.11212121 |            | 0.112121212 |             |           | 0.0581395 |
| ENSG00000182372 |            | 0.35632184 |            | 0.356321839 |             |           | 0.3068182 |
| ENSG00000094755 | 0.4494382  | 0.44545455 | 0.4494382  | 0.445454545 | 0.295454545 | 0.2272727 | 0.2790698 |
| ENSG00000177885 |            | 0.23333333 |            | 0.233333333 |             |           | 0.0523256 |
| ENSG00000162430 |            | 0.23030303 |            | 0.23030303  |             |           | 0.3313953 |
| ENSG00000126216 |            | 0.2030303  |            | 0.203030303 |             |           | 0.494186  |
| ENSG00000240230 |            | 0.41212121 |            | 0.412121212 |             |           | 0.372093  |
| ENSG00000186417 |            | 0.43888889 |            | 0.438888889 |             |           | 0.5       |
| ENSG00000113441 | 0.07784431 | 0.49444444 | 0.07784431 | 0.494444444 | 0.06547619  | 0.0988372 | 0.4431818 |
| ENSG00000172789 |            | 0.06666667 |            | 0.066666667 |             |           | 0.0581395 |
| ENSG00000144792 |            | 0.2375     |            | 0.2375      |             |           |           |
| ENSG00000183655 | 0.28143713 | 0.26060606 | 0.28143713 | 0.260606061 | 0.166666667 | 0.127907  | 0.4825581 |
| ENSG00000154734 | 0.05421687 | 0.12424242 | 0.05421687 | 0.124242424 | 0.403614458 | 0.4117647 | 0.4767442 |
| ENSG00000071073 |            | 0.23030303 |            | 0.23030303  |             |           | 0.2965116 |
| ENSG00000005206 |            | 0.40606061 |            | 0.406060606 |             |           | 0.3588235 |
| ENSG00000153827 |            | 0.13333333 |            | 0.133333333 |             |           | 0.0930233 |
| ENSG00000121644 |            | 0.20426829 |            | 0.204268293 |             |           | 0.3941176 |
| ENSG00000149716 |            | 0.30606061 |            | 0.306060606 |             |           | 0.1337209 |
| ENSG00000161202 |            | 0.22727273 |            | 0.227272727 |             |           |           |
| ENSG00000245848 |            | 0.19631902 |            | 0.196319018 |             |           |           |
| ENSG00000167615 | 0.32228916 | 0.1        | 0.32228916 | 0.1         | 0.344444444 | 0.3915663 | 0.3837209 |
| ENSG00000132554 | 0.10542169 |            | 0.10542169 |             | 0.280487805 | 0.244186  |           |
| ENSG00000100243 | 0.09281437 | 0.13888889 | 0.09281437 | 0.138888889 | 0.452380952 | 0.4302326 | 0.3953488 |
| ENSG00000138735 |            | 0.23636364 |            | 0.236363636 |             |           | 0.4090909 |
| ENSG00000107562 |            | 0.37222222 |            | 0.372222222 |             |           | 0.4767442 |
| ENSG00000197872 | 0.18373494 | 0.35093168 | 0.18373494 | 0.350931677 |             |           | 0.4883721 |
| ENSG00000137460 |            | 0.10060976 |            | 0.100609756 |             |           |           |

|                 |            |            |            |             |             |           |           |
|-----------------|------------|------------|------------|-------------|-------------|-----------|-----------|
| ENSG00000166821 | 0.2005988  | 0.32317073 | 0.2005988  | 0.323170732 | 0.30952381  | 0.3176471 | 0.3197674 |
| ENSG00000181104 |            | 0.24848485 |            | 0.248484848 |             |           | 0.1235294 |
| ENSG0000060982  | 0.05988024 | 0.41515152 | 0.05988024 | 0.415151515 | 0.188888889 | 0.1363636 | 0.4940476 |
| ENSG00000233670 | 0.21111111 | 0.26969697 | 0.21111111 | 0.26969697  |             |           | 0.1704545 |
| ENSG00000166189 |            | 0.17575758 |            | 0.175757576 |             |           | 0.4069767 |
| ENSG00000122643 | 0.05113636 | 0.23493976 | 0.05113636 | 0.234939759 |             |           | 0.4767442 |
| ENSG00000151502 |            | 0.30792683 |            | 0.307926829 |             |           | 0.2325581 |
| ENSG00000123130 | 0.45508982 | 0.22560976 | 0.45508982 | 0.225609756 | 0.321428571 | 0.3197674 |           |
| ENSG00000221888 | 0.44578313 |            | 0.44578313 |             |             | 0.0523256 |           |
| ENSG00000162104 |            | 0.37575758 |            | 0.375757576 |             |           | 0.3837209 |
| ENSG00000179270 |            | 0.46604938 |            | 0.466049383 |             |           | 0.4705882 |
| ENSG00000114742 | 0.25       | 0.28484848 | 0.25       | 0.284848485 | 0.398809524 | 0.3023256 | 0.4011628 |
| ENSG00000107854 |            | 0.10909091 |            | 0.109090909 |             |           | 0.3181818 |
| ENSG00000162761 |            | 0.25609756 |            | 0.256097561 |             |           | 0.0930233 |
| ENSG00000159788 | 0.06886228 | 0.25555556 | 0.06886228 | 0.255555556 |             |           | 0.4545455 |
| ENSG00000167281 | 0.42727273 |            | 0.42727273 |             | 0.102409639 | 0.1744186 |           |
| ENSG00000172845 |            | 0.38888889 |            | 0.388888889 |             |           | 0.3902439 |
| ENSG00000173295 | 0.3        |            | 0.3        |             | 0.209876543 | 0.1363636 | 0.0639535 |
| ENSG00000120337 |            | 0.26219512 |            | 0.262195122 |             |           | 0.2151163 |
| ENSG00000168672 |            |            |            |             | 0.101190476 | 0.0930233 | 0.0523256 |
| ENSG00000248383 |            | 0.42378049 |            | 0.423780488 |             |           | 0.4705882 |
| ENSG00000103569 |            | 0.14596273 |            | 0.145962733 |             |           | 0.1823529 |
| ENSG0000064989  | 0.36111111 | 0.28353659 | 0.36111111 | 0.283536585 | 0.111111111 | 0.0909091 | 0.0588235 |
| ENSG0000086205  | 0.36144578 | 0.32777778 | 0.36144578 | 0.327777778 | 0.285714286 | 0.4244186 | 0.4244186 |
| ENSG00000180370 |            | 0.44848485 |            | 0.448484848 |             |           | 0.1162791 |
| ENSG00000073969 |            | 0.18181818 |            | 0.181818182 |             |           |           |
| ENSG00000239887 | 0.08982036 | 0.41818182 | 0.08982036 | 0.418181818 | 0.19047619  | 0.122093  | 0.4534884 |
| ENSG00000005486 |            | 0.27272727 |            | 0.272727273 |             |           | 0.3604651 |
| ENSG00000105705 |            | 0.19444444 |            | 0.194444444 |             |           |           |
| ENSG00000122481 |            | 0.1        |            | 0.1         |             |           | 0.1176471 |
| ENSG00000144218 | 0.19161677 | 0.42134831 | 0.19161677 | 0.421348315 |             |           |           |
| ENSG00000184557 |            | 0.14848485 |            | 0.148484848 |             |           | 0.4069767 |
| ENSG00000120370 |            | 0.39696969 |            | 0.396969697 |             |           | 0.0581395 |
| ENSG00000166454 |            | 0.13333333 |            | 0.133333333 |             |           | 0.3023256 |
| ENSG00000132646 |            | 0.10555556 |            | 0.105555556 |             |           |           |
| ENSG00000164941 |            | 0.48417722 |            | 0.484177215 |             |           | 0.3430233 |
| ENSG00000145996 |            | 0.39655172 |            | 0.396551724 |             |           | 0.2613636 |
| ENSG00000118804 | 0.26347305 | 0.13030303 | 0.26347305 | 0.13030303  | 0.363095238 | 0.4011628 | 0.2093023 |
| ENSG00000214708 |            | 0.17073171 |            | 0.170731707 |             |           | 0.2857143 |
| ENSG00000034239 |            | 0.21341463 |            | 0.213414634 |             |           | 0.3081395 |
| ENSG00000100346 |            | 0.20909091 |            | 0.209090909 |             |           |           |
| ENSG00000100612 | 0.26347305 | 0.11280488 | 0.26347305 | 0.112804878 | 0.06547619  |           | 0.3941176 |
| ENSG00000162384 |            | 0.36969697 |            | 0.36969697  |             |           | 0.4764706 |
| ENSG00000004700 | 0.4760479  | 0.5        | 0.4760479  | 0.5         |             |           | 0.372093  |
| ENSG00000154174 | 0.47727273 | 0.32121212 | 0.47727273 | 0.321212121 | 0.433333333 | 0.3977273 | 0.2209302 |
| ENSG00000196224 | 0.23493976 | 0.16768293 | 0.23493976 | 0.167682927 |             | 0.0523256 | 0.4647059 |
| ENSG00000083290 |            | 0.06111111 |            | 0.061111111 |             |           | 0.3255814 |
| ENSG00000133805 | 0.47289157 | 0.38181818 | 0.47289157 | 0.381818182 | 0.178571429 | 0.2616279 | 0.3837209 |
| ENSG00000218357 | 0.13473054 | 0.35802469 | 0.13473054 | 0.358024691 | 0.148809524 | 0.1918605 | 0.1802326 |
| ENSG00000082153 | 0.30239521 |            | 0.30239521 |             | 0.311111111 | 0.1569767 |           |
| ENSG00000135355 |            | 0.36585366 |            | 0.365853659 |             |           |           |
| ENSG00000113140 |            | 0.48275862 |            | 0.482758621 |             |           | 0.4659091 |
| ENSG00000143569 |            | 0.47272727 |            | 0.472727273 |             |           | 0.4476744 |
| ENSG00000214097 |            | 0.37878788 |            | 0.378787879 |             |           | 0.0588235 |

|                 |            |            |            |             |             |           |           |
|-----------------|------------|------------|------------|-------------|-------------|-----------|-----------|
| ENSG00000145700 |            | 0.36363636 |            | 0.363636364 |             |           | 0.4767442 |
| ENSG00000164031 |            | 0.23563218 |            | 0.235632184 |             |           | 0.1704545 |
| ENSG00000111850 | 0.09337349 | 0.40797546 | 0.09337349 | 0.40797546  | 0.113095238 | 0.1162791 | 0.3975904 |
| ENSG00000138764 | 0.07185629 | 0.46060606 | 0.07185629 | 0.460606061 |             |           | 0.4883721 |
| ENSG00000101198 | 0.34730539 | 0.13803681 | 0.34730539 | 0.13803681  | 0.113095238 | 0.1453488 | 0.2965116 |
| ENSG00000168028 | 0.15868263 |            | 0.15868263 |             | 0.279761905 | 0.3176471 |           |
| ENSG00000162910 | 0.23652695 |            | 0.23652695 |             | 0.21686747  | 0.2034884 |           |
| ENSG00000153498 | 0.05389222 |            | 0.05389222 |             | 0.301204819 | 0.3372093 |           |
| ENSG00000179913 |            | 0.22256098 |            | 0.222560976 |             |           | 0.4186047 |
| ENSG00000075618 | 0.33532934 |            | 0.33532934 |             | 0.113095238 | 0.1337209 |           |
| ENSG00000135801 |            | 0.43636364 |            | 0.436363636 |             |           | 0.494186  |
| ENSG00000143167 | 0.43113772 | 0.46646341 | 0.43113772 | 0.466463415 | 0.196428571 | 0.1802326 | 0.4651163 |
| ENSG00000100519 |            | 0.4054878  |            | 0.405487805 |             |           | 0.4244186 |
| ENSG00000148154 |            | 0.30606061 |            | 0.306060606 |             |           | 0.25      |
| ENSG00000119969 |            | 0.43333333 |            | 0.433333333 |             |           | 0.3255814 |
| ENSG00000136275 | 0.35632184 | 0.5        | 0.35632184 | 0.5         | 0.420454545 | 0.2906977 | 0.2840909 |
| ENSG00000117215 |            | 0.47777778 |            | 0.477777778 |             |           | 0.3522727 |
| ENSG00000175898 |            | 0.31515152 |            | 0.315151515 |             |           | 0.3953488 |
| ENSG00000178401 | 0.28443114 |            | 0.28443114 |             |             |           | 0.1022727 |
| ENSG00000205108 |            | 0.4969697  |            | 0.496969697 |             |           | 0.4534884 |
| ENSG00000187210 | 0.2994012  | 0.45977011 | 0.2994012  | 0.459770115 | 0.156626506 |           | 0.255814  |
| ENSG00000175581 | 0.17664671 | 0.07222222 | 0.17664671 | 0.072222222 | 0.44047619  | 0.4883721 | 0.0666667 |
| ENSG00000155897 | 0.28313253 |            | 0.28313253 |             | 0.28313253  | 0.3470588 |           |
| ENSG00000171219 |            | 0.22777778 |            | 0.227777778 |             |           | 0.4222222 |
| ENSG00000204859 | 0.0988024  |            | 0.0988024  |             |             |           |           |
| ENSG00000215217 |            | 0.43636364 |            | 0.436363636 |             |           | 0.3662791 |
| ENSG00000186047 |            | 0.0969697  |            | 0.096969697 |             |           | 0.2093023 |
| ENSG00000181072 |            | 0.47777778 |            | 0.477777778 |             |           | 0.3977273 |
| ENSG00000175105 | 0.47005988 | 0.16463415 | 0.47005988 | 0.164634146 | 0.172619048 | 0.0813953 | 0.0813953 |
| ENSG00000205441 |            | 0.0872093  |            | 0.087209302 |             |           | 0.1395349 |
| ENSG00000124214 |            | 0.35555556 |            | 0.355555556 |             |           | 0.2888889 |
| ENSG00000185942 | 0.43888889 | 0.41011236 | 0.43888889 | 0.41011236  | 0.433333333 | 0.3863636 | 0.2383721 |
| ENSG00000205922 |            | 0.42528736 |            | 0.425287356 | 0.366666667 | 0.1704545 | 0.5       |
| ENSG00000133114 |            |            |            |             |             |           | 0.1666667 |
| ENSG00000141699 |            | 0.37575758 |            | 0.375757576 |             |           | 0.4593023 |
| ENSG00000156802 |            | 0.34545455 |            | 0.345454545 |             |           | 0.4825581 |
| ENSG00000173542 |            | 0.21036585 |            | 0.210365854 |             |           | 0.2764706 |
| ENSG00000171431 |            | 0.41011236 |            | 0.41011236  |             |           | 0.4127907 |
| ENSG00000030582 |            | 0.24242424 |            | 0.242424242 |             |           | 0.2267442 |
| ENSG00000137843 |            | 0.35060976 |            | 0.350609756 | 0.077380952 |           | 0.2267442 |
| ENSG00000130988 |            | 0.1        |            | 0.1         | 0.178571429 | 0.2325581 |           |
| ENSG00000185753 | 0.36445783 |            | 0.36445783 |             | 0.130952381 | 0.1860465 |           |
| ENSG00000121933 |            | 0.44545455 |            | 0.445454545 |             |           | 0.4069767 |
| ENSG00000152977 |            | 0.32424242 |            | 0.324242424 |             |           | 0.2906977 |
| ENSG00000197860 |            | 0.31111111 |            | 0.311111111 |             |           | 0.3869048 |
| ENSG00000197555 |            |            |            |             | 0.077380952 | 0.0639535 |           |
| ENSG00000144152 |            | 0.22777778 |            | 0.227777778 |             |           |           |
| ENSG00000114026 |            | 0.2183908  |            | 0.218390805 |             |           | 0.4772727 |
| ENSG00000168938 |            | 0.4068323  |            | 0.406832298 |             |           |           |
| ENSG00000144935 | 0.19760479 | 0.18209877 | 0.19760479 | 0.182098765 | 0.37195122  | 0.3614458 | 0.2916667 |
| ENSG00000099985 | 0.13888889 | 0.16363636 | 0.13888889 | 0.163636364 |             |           | 0.2209302 |
| ENSG00000159167 |            | 0.14939024 |            | 0.149390244 |             |           | 0.1470588 |
| ENSG00000145016 |            | 0.06666667 |            | 0.066666667 |             |           | 0.125     |
| ENSG00000161653 |            | 0.34545455 |            | 0.345454545 |             |           | 0.2209302 |

|                 |            |            |            |             |             |           |           |
|-----------------|------------|------------|------------|-------------|-------------|-----------|-----------|
| ENSG00000135299 |            | 0.26875    |            | 0.26875     |             |           | 0.2727273 |
| ENSG00000137815 |            | 0.47272727 |            | 0.472727273 |             |           | 0.2732558 |
| ENSG00000090615 |            | 0.22121212 |            | 0.221212121 |             |           | 0.4244186 |
| ENSG00000164611 | 0.15454545 |            | 0.15454545 |             | 0.160714286 | 0.1860465 |           |
| ENSG00000079332 |            | 0.42236025 |            | 0.422360248 | 0.090909091 | 0.0581395 | 0.0666667 |
| ENSG00000173585 |            | 0.10795455 |            | 0.107954545 |             |           |           |
| ENSG00000253350 |            | 0.23333333 |            | 0.233333333 |             |           | 0.3470588 |
| ENSG00000145220 | 0.39820359 |            | 0.39820359 |             | 0.487804878 | 0.4651163 |           |
| ENSG00000155096 | 0.07386364 | 0.32777778 | 0.07386364 | 0.327777778 | 0.222222222 | 0.1704545 | 0.2386364 |
| ENSG00000164885 | 0.41566265 |            | 0.41566265 |             | 0.297619048 | 0.2906977 |           |
| ENSG00000132256 | 0.38068182 | 0.11515152 | 0.38068182 | 0.115151515 | 0.5         | 0.4825581 | 0.4941176 |
| ENSG00000161281 | 0.26646707 |            | 0.26646707 |             | 0.321428571 | 0.3837209 |           |
| ENSG00000106609 |            | 0.25786164 |            | 0.257861635 | 0.069767442 | 0.127907  | 0.25      |
| ENSG00000198854 |            | 0.35757576 |            | 0.357575758 |             |           | 0.1453488 |
| ENSG00000108852 | 0.37724551 | 0.20909091 | 0.37724551 | 0.209090909 | 0.375       | 0.377907  |           |
| ENSG00000165376 | 0.37222222 |            | 0.37222222 |             |             |           |           |
| ENSG00000054793 |            | 0.35454545 |            | 0.354545455 |             |           | 0.4825581 |
| ENSG00000178950 |            | 0.32424242 |            | 0.324242424 |             |           | 0.2235294 |
| ENSG00000166582 |            | 0.48484848 |            | 0.484848485 |             |           |           |
| ENSG00000173566 |            | 0.46969697 |            | 0.46969697  |             |           | 0.4117647 |
| ENSG00000164741 | 0.46407186 | 0.33636364 | 0.46407186 | 0.336363636 | 0.416666667 | 0.4302326 | 0.4011628 |
| ENSG00000101098 |            | 0.46969697 |            | 0.46969697  |             |           | 0.4651163 |
| ENSG00000117598 |            | 0.31515152 |            | 0.315151515 |             |           | 0.3546512 |
| ENSG00000186187 | 0.0988024  | 0.49695122 | 0.0988024  | 0.49695122  | 0.226190476 | 0.1104651 | 0.1686047 |
| ENSG00000042832 | 0.38253012 | 0.4969697  | 0.38253012 | 0.496969697 | 0.345238095 | 0.3546512 | 0.3604651 |
| ENSG00000229117 |            |            |            |             | 0.095238095 | 0.0697674 |           |
| ENSG00000188523 |            | 0.41111111 |            | 0.411111111 |             |           | 0.1136364 |
| ENSG00000089199 |            | 0.42592593 |            | 0.425925926 |             |           | 0.494186  |
| ENSG00000163558 |            | 0.17878788 |            | 0.178787879 |             |           |           |
| ENSG00000138867 |            | 0.14444444 |            | 0.144444444 |             |           | 0.2674419 |
| ENSG00000129467 |            | 0.12209302 |            | 0.122093023 |             |           |           |
| ENSG00000166016 | 0.28443114 |            | 0.28443114 |             | 0.333333333 | 0.3953488 |           |
| ENSG00000145241 |            | 0.37575758 |            | 0.375757576 |             |           | 0.2383721 |
| ENSG00000150093 | 0.16060606 | 0.08426966 | 0.16060606 | 0.084269663 | 0.244047619 | 0.255814  |           |
| ENSG00000171060 |            |            |            |             |             |           | 0.25      |
| ENSG00000141040 |            | 0.06060606 |            | 0.060606061 |             |           |           |
| ENSG00000168610 |            | 0.4        |            | 0.4         |             |           | 0.4390244 |
| ENSG00000149571 | 0.16766467 | 0.48333333 | 0.16766467 | 0.483333333 | 0.422619048 | 0.3255814 | 0.4302326 |
| ENSG00000254647 |            | 0.23636364 |            | 0.236363636 |             |           |           |
| ENSG00000147044 |            | 0.11515152 |            | 0.115151515 |             |           | 0.0823529 |
| ENSG00000139344 | 0.0988024  |            | 0.0988024  |             | 0.408536585 | 0.3941176 |           |
| ENSG00000163412 |            | 0.15243902 |            | 0.152439024 |             |           | 0.3977273 |
| ENSG00000168439 | 0.18787879 |            | 0.18787879 |             | 0.409638554 | 0.4941176 |           |
| ENSG00000116191 |            | 0.41212121 |            | 0.412121212 |             |           | 0.3081395 |
| ENSG00000242366 | 0.10555556 | 0.22777778 | 0.10555556 | 0.227777778 |             |           | 0.1590909 |
| ENSG00000133027 |            |            |            |             | 0.077777778 | 0.0568182 |           |
| ENSG00000183269 |            | 0.49090909 |            | 0.490909091 |             |           | 0.3197674 |
| ENSG00000176049 |            |            |            |             |             |           | 0.1627907 |
| ENSG00000133639 | 0.46107784 | 0.16969697 | 0.46107784 | 0.16969697  | 0.416666667 | 0.3255814 | 0.3372093 |
| ENSG00000132109 | 0.2245509  | 0.0862069  | 0.2245509  | 0.086206897 | 0.226190476 | 0.2732558 | 0.4941176 |
| ENSG00000149591 | 0.18562874 |            | 0.18562874 |             |             |           |           |
| ENSG00000150455 | 0.05988024 | 0.24085366 | 0.05988024 | 0.240853659 |             |           | 0.172619  |
| ENSG00000123505 |            |            |            |             |             |           | 0.3705882 |
| ENSG00000155130 |            | 0.43939394 |            | 0.439393939 |             |           | 0.2965116 |

|                 |            |            |            |             |             |           |           |
|-----------------|------------|------------|------------|-------------|-------------|-----------|-----------|
| ENSG00000144649 | 0.11666667 | 0.2        | 0.11666667 | 0.2         |             |           | 0.1588235 |
| ENSG0000048544  |            | 0.3404908  |            | 0.340490798 |             |           | 0.1802326 |
| ENSG00000111725 | 0.125      | 0.35060976 | 0.125      | 0.350609756 | 0.477777778 | 0.4318182 |           |
| ENSG00000149273 |            | 0.2        |            | 0.2         | 0.208333333 | 0.1104651 | 0.3081395 |
| ENSG00000177542 | 0.17365269 | 0.46604938 | 0.17365269 | 0.466049383 |             |           | 0.4764706 |
| ENSG00000149743 | 0.12352941 |            | 0.12352941 |             |             |           |           |
| ENSG00000212734 |            | 0.14848485 |            | 0.148484848 |             |           | 0.4476744 |
| ENSG00000198040 | 0.43113772 | 0.35060976 | 0.43113772 | 0.350609756 | 0.208333333 | 0.1511628 | 0.127907  |
| ENSG00000110906 | 0.31736527 | 0.25925926 | 0.31736527 | 0.259259259 | 0.339285714 | 0.2674419 | 0.1235294 |
| ENSG00000254221 |            | 0.20224719 |            | 0.202247191 |             |           | 0.1477273 |
| ENSG00000176597 | 0.07784431 |            | 0.07784431 |             | 0.208333333 | 0.244186  |           |
| ENSG00000167333 | 0.48493976 | 0.35151515 | 0.48493976 | 0.351515152 |             |           | 0.3411765 |
| ENSG00000183918 |            | 0.14545455 |            | 0.145454545 |             |           | 0.3352941 |
| ENSG00000109846 | 0.18263473 | 0.32121212 | 0.18263473 | 0.321212121 | 0.148809524 | 0.1976744 | 0.1976744 |
| ENSG00000215346 | 0.4760479  |            | 0.4760479  |             | 0.053571429 |           |           |
| ENSG00000008324 |            | 0.33333333 |            | 0.333333333 |             |           | 0.4764706 |
| ENSG00000213079 |            | 0.42777778 |            | 0.427777778 |             |           |           |
| ENSG00000091428 | 0.48802395 |            | 0.48802395 |             | 0.345238095 | 0.4476744 |           |
| ENSG00000099331 | 0.33832335 |            | 0.33832335 |             | 0.261904762 | 0.2906977 |           |
| ENSG00000138071 |            | 0.3        |            | 0.3         |             |           | 0.2906977 |
| ENSG00000128655 | 0.30120482 | 0.27878788 | 0.30120482 | 0.278787879 | 0.19047619  | 0.2383721 | 0.3488372 |
| ENSG00000173638 | 0.2994012  | 0.42696629 | 0.2994012  | 0.426966292 | 0.5         | 0.4418605 | 0.4360465 |
| ENSG00000132357 |            | 0.42901235 |            | 0.429012346 |             |           | 0.4695122 |
| ENSG00000104415 |            | 0.37272727 |            | 0.372727273 |             |           | 0.0755814 |
| ENSG00000175311 |            | 0.27878788 |            | 0.278787879 |             |           |           |
| ENSG00000184588 |            | 0.26060606 |            | 0.260606061 |             |           |           |
| ENSG00000255062 | 0.0748503  | 0.23333333 | 0.0748503  | 0.233333333 | 0.331325301 | 0.4176471 |           |
| ENSG00000077514 | 0.36227545 | 0.17878788 | 0.36227545 | 0.178787879 | 0.297619048 | 0.372093  | 0.2727273 |
| ENSG00000122012 | 0.1497006  | 0.49393939 | 0.1497006  | 0.493939394 | 0.30952381  | 0.3081395 | 0.4772727 |
| ENSG00000158941 | 0.49700599 | 0.34545455 | 0.49700599 | 0.345454545 | 0.291666667 | 0.3430233 | 0.4709302 |
| ENSG00000181666 |            |            |            |             | 0.058139535 | 0.0697674 |           |
| ENSG00000173715 |            | 0.27586207 |            | 0.275862069 |             |           | 0.1022727 |
| ENSG00000104689 | 0.20359281 |            | 0.20359281 |             |             |           |           |
| ENSG00000125818 | 0.20454545 | 0.40909091 | 0.20454545 | 0.409090909 | 0.410714286 | 0.4642857 | 0.4069767 |
| ENSG00000088876 | 0.41017964 | 0.23939394 | 0.41017964 | 0.239393939 | 0.238095238 | 0.3058824 | 0.3255814 |
| ENSG00000004534 | 0.30538922 | 0.47272727 | 0.30538922 | 0.472727273 | 0.148809524 | 0.1918605 | 0.1802326 |
| ENSG00000100949 |            | 0.29878049 |            | 0.298780488 |             |           | 0.3953488 |
| ENSG00000133110 |            | 0.13125    |            | 0.13125     | 0.333333333 | 0.2777778 | 0.0714286 |
| ENSG00000169762 |            | 0.42528736 |            | 0.425287356 |             |           | 0.2965116 |
| ENSG00000178053 | 0.33333333 | 0.42424242 | 0.33333333 | 0.424242424 |             | 0.1111111 | 0.4102564 |
| ENSG00000126746 |            | 0.47126437 |            | 0.471264368 |             |           |           |
| ENSG00000133019 | 0.14670659 | 0.38484848 | 0.14670659 | 0.384848485 |             |           | 0.4534884 |
| ENSG00000111711 | 0.26946108 | 0.4847561  | 0.26946108 | 0.484756098 |             |           | 0.4883721 |
| ENSG00000158636 |            | 0.5        |            | 0.5         |             |           | 0.5       |
| ENSG00000143153 |            |            |            |             |             |           | 0.2375    |
| ENSG00000163286 |            | 0.1        |            | 0.1         |             |           | 0.2272727 |
| ENSG00000071553 |            | 0.07453416 |            | 0.074534161 |             |           | 0.1046512 |
| ENSG00000136628 |            | 0.45977011 |            | 0.459770115 |             |           | 0.4318182 |
| ENSG00000143499 |            |            |            |             |             |           | 0.2906977 |
| ENSG00000078487 | 0.15269461 | 0.16969697 | 0.15269461 | 0.16969697  | 0.154761905 | 0.244186  |           |
| ENSG00000118007 |            | 0.47204969 |            | 0.472049689 |             |           | 0.2045455 |
| ENSG00000101251 | 0.13473054 | 0.26666667 | 0.13473054 | 0.266666667 | 0.255952381 | 0.3139535 | 0.122093  |
| ENSG00000114948 |            | 0.09090909 |            | 0.090909091 |             |           |           |
| ENSG00000164331 | 0.41616766 | 0.31818182 | 0.41616766 | 0.318181818 | 0.232142857 | 0.0930233 | 0.1744186 |



|                 |            |            |            |             |             |           |           |
|-----------------|------------|------------|------------|-------------|-------------|-----------|-----------|
| ENSG00000176204 |            | 0.44242424 |            | 0.442424242 |             |           | 0.4418605 |
| ENSG00000177595 | 0.05       | 0.49691358 | 0.05       | 0.49691358  | 0.077777778 |           | 0.4709302 |
| ENSG00000149150 |            | 0.23333333 |            | 0.23333333  |             |           | 0.1860465 |
| ENSG00000158023 | 0.45679012 |            | 0.45679012 |             | 0.475903614 | 0.4651163 |           |
| ENSG00000149573 |            | 0.43902439 |            | 0.43902439  |             |           | 0.3470588 |
| ENSG00000189144 |            | 0.15757576 |            | 0.157575758 | 0.107142857 | 0.0581395 | 0.3313953 |
| ENSG00000099139 | 0.48502994 | 0.43939394 | 0.48502994 | 0.439393939 |             |           | 0.4476744 |
| ENSG00000151338 | 0.21856287 | 0.37116564 | 0.21856287 | 0.371165644 | 0.392857143 | 0.4011628 | 0.2045455 |
| ENSG00000088298 |            | 0.38484848 |            | 0.384848485 |             |           | 0.2117647 |
| ENSG00000086570 |            | 0.22727273 |            | 0.227272727 |             |           | 0.1511628 |
| ENSG00000110002 |            | 0.47701149 |            | 0.477011494 |             |           | 0.4360465 |
| ENSG00000188659 | 0.11746988 | 0.5        | 0.11746988 | 0.5         | 0.182926829 | 0.2117647 | 0.2840909 |
| ENSG00000145214 |            | 0.49393939 |            | 0.493939394 |             |           | 0.4244186 |
| ENSG00000117480 | 0.43072289 |            | 0.43072289 |             | 0.142857143 | 0.1860465 |           |
| ENSG00000139618 | 0.08888889 | 0.29090909 | 0.08888889 | 0.290909091 | 0.297619048 | 0.4651163 | 0.1802326 |
| ENSG00000140506 |            |            |            |             |             |           | 0.1511628 |
| ENSG00000071794 |            | 0.35       |            | 0.35        |             |           | 0.377907  |
| ENSG00000092201 |            | 0.07222222 |            | 0.072222222 |             |           | 0.122093  |
| ENSG00000160870 |            | 0.08024691 |            | 0.080246914 |             |           | 0.2647059 |
| ENSG00000102575 | 0.27245509 |            | 0.27245509 |             | 0.439759036 | 0.4476744 |           |
| ENSG00000205863 |            | 0.1875     |            | 0.1875      |             |           |           |
| ENSG00000122507 | 0.06927711 | 0.27272727 | 0.06927711 | 0.272727273 | 0.136904762 | 0.122093  | 0.3181818 |
| ENSG00000186334 | 0.32222222 | 0.22121212 | 0.32222222 | 0.221212121 | 0.464285714 | 0.4705882 | 0.2034884 |
| ENSG00000107738 |            | 0.45151515 |            | 0.451515152 |             |           | 0.3941176 |
| ENSG00000156395 |            | 0.22727273 |            | 0.227272727 |             |           | 0.2674419 |
| ENSG00000154781 |            | 0.38719512 |            | 0.387195122 |             |           | 0.5       |
| ENSG00000148671 |            | 0.45151515 |            | 0.451515152 |             |           | 0.3255814 |
| ENSG00000163914 | 0.24850299 |            | 0.24850299 |             | 0.411111111 | 0.4418605 | 0.4886364 |
| ENSG00000171121 | 0.46111111 | 0.18888889 | 0.46111111 | 0.188888889 | 0.113095238 | 0.127907  | 0.0777778 |
| ENSG00000119608 |            | 0.05151515 |            | 0.051515152 |             |           |           |
| ENSG00000152822 |            | 0.46646341 |            | 0.466463415 |             |           | 0.4772727 |
| ENSG00000169903 | 0.28313253 | 0.1        | 0.28313253 | 0.1         | 0.13253012  | 0.1453488 | 0.3372093 |
| ENSG00000196547 | 0.30838323 | 0.32727273 | 0.30838323 | 0.327272727 |             |           |           |
| ENSG00000168702 | 0.22754491 | 0.33030303 | 0.22754491 | 0.33030303  | 0.351190476 | 0.2764706 | 0.4767442 |
| ENSG00000147454 |            | 0.43636364 |            | 0.436363636 |             |           | 0.4470588 |
| ENSG00000242866 |            | 0.07777778 |            | 0.077777778 |             |           | 0.3975904 |
| ENSG00000205726 |            | 0.5        |            | 0.5         |             |           | 0.4418605 |
| ENSG00000132205 |            | 0.40555556 |            | 0.405555556 |             |           | 0.3430233 |
| ENSG00000100266 |            | 0.47272727 |            | 0.472727273 |             |           | 0.3953488 |
| ENSG00000205639 |            | 0.1        |            | 0.1         |             |           |           |
| ENSG00000108599 |            | 0.29090909 |            | 0.290909091 |             |           |           |
| ENSG00000132824 |            | 0.16363636 |            | 0.163636364 |             |           | 0.0581395 |
| ENSG00000226742 |            | 0.43209877 |            | 0.432098765 |             |           | 0.4819277 |
| ENSG00000153790 |            | 0.22727273 |            | 0.227272727 |             |           | 0.25      |
| ENSG00000169218 |            | 0.45757576 |            | 0.457575758 |             |           | 0.2848837 |
| ENSG00000256618 | 0.35955056 |            | 0.35955056 |             | 0.411111111 | 0.3863636 |           |
| ENSG00000070731 |            | 0.13939394 |            | 0.139393939 |             |           | 0.0697674 |
| ENSG00000112893 |            | 0.07878788 |            | 0.078787879 |             |           |           |
| ENSG00000135334 | 0.30838323 |            | 0.30838323 |             | 0.327380952 | 0.2965116 |           |
| ENSG00000160445 |            | 0.38484848 |            | 0.384848485 |             |           | 0.2529412 |
| ENSG00000197857 | 0.23652695 |            | 0.23652695 |             | 0.351190476 | 0.2823529 |           |
| ENSG00000114656 |            | 0.41818182 |            | 0.418181818 | 0.148809524 | 0.1046512 | 0.5       |
| ENSG00000184226 | 0.14071856 | 0.41515152 | 0.14071856 | 0.415151515 | 0.428571429 | 0.4767442 | 0.494186  |
| ENSG00000127334 |            | 0.40909091 |            | 0.409090909 |             |           | 0.3546512 |

|                 |            |            |            |             |             |           |           |
|-----------------|------------|------------|------------|-------------|-------------|-----------|-----------|
| ENSG00000143149 | 0.12874251 | 0.10606061 | 0.12874251 | 0.106060606 | 0.392857143 | 0.3197674 | 0.1746988 |
| ENSG00000214117 | 0.12275449 |            | 0.12275449 |             | 0.196428571 | 0.2093023 |           |
| ENSG00000089916 | 0.45180723 | 0.4        | 0.45180723 | 0.4         | 0.377777778 | 0.3604651 | 0.4360465 |
| ENSG00000137868 |            | 0.45731707 |            | 0.457317073 |             |           | 0.4244186 |
| ENSG00000131943 |            | 0.42424242 |            | 0.424242424 |             |           | 0.4647059 |
| ENSG00000053254 |            | 0.37575758 |            | 0.375757576 |             |           | 0.4764706 |
| ENSG00000181418 |            | 0.35454545 |            | 0.354545455 |             |           | 0.4011628 |
| ENSG00000134253 | 0.20658683 | 0.41212121 | 0.20658683 | 0.412121212 |             |           | 0.1104651 |
| ENSG00000146966 |            | 0.49393939 |            | 0.493939394 |             |           | 0.1104651 |
| ENSG00000162337 |            | 0.25757576 |            | 0.257575758 |             |           | 0.3352941 |
| ENSG00000062598 | 0.34431138 | 0.09146341 | 0.34431138 | 0.091463415 | 0.259036145 | 0.3647059 | 0.2444444 |
| ENSG00000146670 |            | 0.38181818 |            | 0.381818182 |             |           | 0.1627907 |
| ENSG00000184682 |            |            |            |             |             | 0.0512821 |           |
| ENSG00000184881 |            | 0.12424242 |            | 0.124242424 |             |           | 0.4767442 |
| ENSG00000104859 | 0.0508982  |            | 0.0508982  |             |             |           |           |
| ENSG00000113013 | 0.15168539 | 0.46969697 | 0.15168539 | 0.46969697  |             |           | 0.1744186 |
| ENSG00000170276 | 0.16167665 |            | 0.16167665 |             | 0.232142857 | 0.1860465 |           |
| ENSG00000196184 | 0.33233533 |            | 0.33233533 |             |             |           |           |
| ENSG00000059377 |            | 0.17272727 |            | 0.172727273 |             |           | 0.0988372 |
| ENSG00000168306 | 0.32035928 | 0.08787879 | 0.32035928 | 0.087878788 |             |           | 0.2111111 |
| ENSG00000087301 |            | 0.19817073 |            | 0.198170732 |             |           | 0.2616279 |
| ENSG00000068831 | 0.40419162 | 0.12121212 | 0.40419162 | 0.121212121 | 0.470238095 | 0.3546512 | 0.3488372 |
| ENSG00000087074 | 0.24850299 |            | 0.24850299 |             | 0.119047619 | 0.1627907 |           |
| ENSG00000150990 |            | 0.31666667 |            | 0.316666667 |             |           | 0.2093023 |
| ENSG00000239389 |            | 0.05151515 |            | 0.051515152 |             |           | 0.1162791 |
| ENSG00000179241 |            | 0.27272727 |            | 0.272727273 |             |           | 0.1802326 |
| ENSG00000257390 |            | 0.32222222 |            | 0.322222222 |             |           | 0.3181818 |
| ENSG00000105968 |            | 0.41666667 |            | 0.416666667 |             |           | 0.2176471 |
| ENSG00000120837 |            | 0.32022472 |            | 0.320224719 |             |           | 0.4545455 |
| ENSG00000170260 |            | 0.49390244 |            | 0.493902439 |             |           | 0.4941176 |
| ENSG00000182631 |            | 0.39325843 |            | 0.393258427 |             |           | 0.1022727 |
| ENSG00000198099 |            | 0.27575758 |            | 0.275757576 |             |           |           |
| ENSG00000164542 |            | 0.4054878  |            | 0.405487805 |             |           | 0.4011628 |
| ENSG00000172264 | 0.39506173 | 0.44767442 | 0.39506173 | 0.447674419 | 0.068181818 | 0.0888889 | 0.4360465 |
| ENSG00000146166 |            | 0.46060606 |            | 0.460606061 |             |           | 0.5       |
| ENSG00000112462 |            | 0.46583851 |            | 0.465838509 | 0.148809524 | 0.1046512 | 0.2678571 |
| ENSG00000197818 | 0.40718563 | 0.1402439  | 0.40718563 | 0.140243902 |             |           | 0.3139535 |
| ENSG00000148814 | 0.12874251 | 0.5        | 0.12874251 | 0.5         | 0.375       | 0.3662791 | 0.1918605 |
| ENSG00000104356 |            | 0.28651685 |            | 0.286516854 |             |           | 0.1976744 |
| ENSG00000170324 | 0.41317365 |            | 0.41317365 |             |             |           |           |
| ENSG00000203730 |            | 0.49090909 |            | 0.490909091 | 0.18452381  | 0.2151163 | 0.255814  |
| ENSG00000186860 | 0.17065868 |            | 0.17065868 |             | 0.297619048 | 0.3313953 |           |
| ENSG00000171560 | 0.16467066 | 0.15151515 | 0.16467066 | 0.151515152 | 0.43452381  | 0.4883721 | 0.1352941 |
| ENSG00000112977 |            | 0.24085366 |            | 0.240853659 |             |           | 0.4186047 |
| ENSG00000100884 |            | 0.19631902 |            | 0.196319018 |             |           | 0.3953488 |
| ENSG00000124422 |            | 0.29444444 |            | 0.294444444 |             |           | 0.4883721 |
| ENSG00000146926 |            | 0.3908046  |            | 0.390804598 |             |           | 0.4431818 |
| ENSG00000064115 | 0.07185629 | 0.07236842 | 0.07185629 | 0.072368421 |             |           |           |
| ENSG00000124782 |            | 0.45151515 |            | 0.451515152 |             |           | 0.4244186 |
| ENSG00000082684 | 0.2245509  |            | 0.2245509  |             | 0.380952381 | 0.3953488 |           |
| ENSG00000197124 | 0.22155689 |            | 0.22155689 |             | 0.44047619  | 0.4886364 | 0.1860465 |
| ENSG00000196663 |            | 0.33939394 |            | 0.339393939 |             | 0.0697674 | 0.4411765 |
| ENSG00000070182 | 0.3988764  | 0.15757576 | 0.3988764  | 0.157575758 | 0.327380952 | 0.3255814 | 0.0755814 |
| ENSG00000115539 | 0.07185629 |            | 0.07185629 |             |             |           |           |

|                 |            |            |            |             |             |           |           |
|-----------------|------------|------------|------------|-------------|-------------|-----------|-----------|
| ENSG00000256222 | 0.11111111 | 0.44382022 | 0.11111111 | 0.443820225 |             |           | 0.2555556 |
| ENSG00000166166 |            | 0.39329268 |            | 0.393292683 |             |           | 0.2790698 |
| ENSG00000164199 | 0.13772455 | 0.46969697 | 0.13772455 | 0.46969697  |             |           | 0.5       |
| ENSG00000137709 | 0.09580838 |            | 0.09580838 |             |             |           |           |
| ENSG00000102452 |            | 0.40606061 |            | 0.406060606 |             |           | 0.4418605 |
| ENSG00000215099 |            | 0.18787879 |            | 0.187878788 |             |           | 0.2267442 |
| ENSG00000100601 |            | 0.37878788 |            | 0.378787879 |             |           | 0.4302326 |
| ENSG00000179583 |            | 0.42424242 |            | 0.424242424 |             |           | 0.4512195 |
| ENSG00000165323 |            | 0.37575758 |            | 0.375757576 |             |           | 0.4593023 |
| ENSG00000172175 |            | 0.46111111 |            | 0.461111111 |             |           | 0.4318182 |
| ENSG00000102781 |            | 0.45757576 |            | 0.457575758 |             |           | 0.4176471 |
| ENSG00000169884 | 0.16467066 | 0.33636364 | 0.16467066 | 0.336363636 | 0.44047619  | 0.4069767 | 0.4651163 |
| ENSG00000134330 |            | 0.47272727 |            | 0.472727273 |             |           |           |
| ENSG00000188783 |            | 0.30487805 |            | 0.304878049 |             |           | 0.3081395 |
| ENSG00000144285 |            | 0.35454545 |            | 0.354545455 |             |           | 0.372093  |
| ENSG00000145975 |            | 0.30745342 |            | 0.307453416 |             |           | 0.2965116 |
| ENSG00000147050 |            | 0.23333333 |            | 0.233333333 |             |           | 0.4767442 |
| ENSG00000164659 |            | 0.09393939 |            | 0.093939394 |             |           |           |
| ENSG00000123570 |            | 0.17378049 |            | 0.173780488 |             |           | 0.5       |
| ENSG00000143847 | 0.30239521 | 0.41768293 | 0.30239521 | 0.417682927 | 0.420454545 | 0.4418605 | 0.3882353 |
| ENSG00000171557 |            | 0.2969697  |            | 0.296969697 |             |           | 0.2058824 |
| ENSG00000152193 |            | 0.37037037 |            | 0.37037037  |             |           | 0.3690476 |
| ENSG00000166173 |            | 0.46646341 |            | 0.466463415 |             |           | 0.4593023 |
| ENSG00000166596 |            | 0.23780488 |            | 0.237804878 |             |           | 0.0882353 |
| ENSG00000130803 | 0.37724551 | 0.43333333 | 0.37724551 | 0.433333333 | 0.113095238 | 0.0988372 | 0.3430233 |
| ENSG00000178498 | 0.29518072 |            | 0.29518072 |             | 0.244047619 | 0.2151163 |           |
| ENSG00000130723 | 0.43103448 | 0.20909091 | 0.43103448 | 0.209090909 | 0.077380952 | 0.1084337 | 0.1046512 |
| ENSG00000198092 |            | 0.21212121 |            | 0.212121212 |             |           | 0.1569767 |
| ENSG00000166349 | 0.46067416 | 0.36516854 | 0.46067416 | 0.365168539 | 0.072289157 |           | 0.25      |
| ENSG00000102069 |            | 0.29444444 |            | 0.294444444 |             |           | 0.4545455 |
| ENSG00000076984 |            | 0.35       |            | 0.35        |             |           | 0.4318182 |
| ENSG00000204920 | 0.4251497  | 0.27272727 | 0.4251497  | 0.272727273 | 0.428571429 | 0.4767442 | 0.4360465 |
| ENSG00000197891 | 0.23952096 | 0.11515152 | 0.23952096 | 0.115151515 | 0.261363636 | 0.1818182 | 0.2906977 |
| ENSG00000151353 |            | 0.42727273 |            | 0.427272727 |             |           | 0.4360465 |
| ENSG00000109519 | 0.41818182 | 0.23863636 | 0.41818182 | 0.238636364 | 0.279761905 | 0.3953488 | 0.4011628 |
| ENSG00000169252 | 0.14071856 |            | 0.14071856 |             | 0.107142857 | 0.1162791 |           |
| ENSG00000174453 |            | 0.27011494 |            | 0.270114943 |             |           | 0.2209302 |
| ENSG00000182103 |            | 0.4030303  |            | 0.403030303 |             |           | 0.3488372 |
| ENSG00000105227 |            | 0.5        |            | 0.5         |             |           | 0.1627907 |
| ENSG00000153879 |            | 0.23939394 |            | 0.239393939 |             |           |           |
| ENSG00000129925 | 0.32608696 | 0.42727273 | 0.32608696 | 0.427272727 | 0.313253012 | 0.2732558 | 0.2906977 |
| ENSG00000135525 |            | 0.11212121 |            | 0.112121212 |             |           | 0.4939024 |
| ENSG00000249860 | 0.47904192 |            | 0.47904192 |             | 0.166666667 | 0.1627907 |           |
| ENSG00000054967 |            | 0.22777778 |            | 0.227777778 |             |           |           |
| ENSG00000147183 |            | 0.26687117 |            | 0.266871166 |             |           | 0.4767442 |
| ENSG00000183908 |            | 0.46666667 |            | 0.466666667 |             |           | 0.4011628 |
| ENSG00000150048 |            | 0.13939394 |            | 0.139393939 | 0.215909091 | 0.1931818 | 0.4186047 |
| ENSG00000159596 | 0.47891566 |            | 0.47891566 |             | 0.427710843 | 0.3372093 |           |
| ENSG00000123165 |            | 0.05       |            | 0.05        |             |           |           |
| ENSG00000183605 | 0.48203593 |            | 0.48203593 |             | 0.273809524 | 0.3255814 | 0.2209302 |
| ENSG00000141349 |            |            |            |             | 0.188888889 | 0.2159091 |           |
| ENSG00000156671 |            | 0.25       |            | 0.25        |             |           | 0.4235294 |
| ENSG00000130202 |            | 0.43333333 |            | 0.433333333 |             |           | 0.3604651 |
| ENSG00000154096 | 0.33146067 | 0.42567568 | 0.33146067 | 0.425675676 | 0.088888889 | 0.1976744 | 0.2272727 |

|                 |            |            |            |             |             |           |           |
|-----------------|------------|------------|------------|-------------|-------------|-----------|-----------|
| ENSG00000131242 |            | 0.38484848 |            | 0.384848485 |             |           | 0.4709302 |
| ENSG00000204644 | 0.28888889 |            | 0.28888889 |             | 0.333333333 |           | 0.3837209 |
| ENSG00000145723 |            | 0.30606061 |            | 0.306060606 |             |           | 0.4825581 |
| ENSG00000153575 | 0.19578313 | 0.08231707 | 0.19578313 | 0.082317073 | 0.072289157 | 0.0588235 | 0.4360465 |
| ENSG00000153406 | 0.33707865 |            | 0.33707865 |             |             |           |           |
| ENSG00000177106 | 0.18862275 | 0.44817073 | 0.18862275 | 0.448170732 | 0.210843373 | 0.2267442 | 0.3430233 |
| ENSG00000078140 |            | 0.24242424 |            | 0.242424242 |             |           | 0.1046512 |
| ENSG00000179532 | 0.20481928 | 0.49090909 | 0.20481928 | 0.490909091 | 0.19047619  | 0.244186  | 0.372093  |
| ENSG00000205220 | 0.21556886 |            | 0.21556886 |             |             |           |           |
| ENSG00000188938 | 0.48765432 | 0.33030303 | 0.48765432 | 0.33030303  | 0.178571429 | 0.1395349 | 0.4470588 |
| ENSG00000179833 |            | 0.42727273 |            | 0.427272727 |             |           | 0.4127907 |
| ENSG00000181649 |            | 0.15454545 |            | 0.154545455 |             |           | 0.1       |
| ENSG00000117280 | 0.38023952 | 0.47575758 | 0.38023952 | 0.475757576 | 0.482142857 | 0.4825581 | 0.4244186 |
| ENSG00000099385 |            | 0.38719512 |            | 0.387195122 |             |           | 0.1097561 |
| ENSG00000108296 |            | 0.43333333 |            | 0.433333333 |             |           | 0.2176471 |
| ENSG00000186976 | 0.12359551 |            | 0.12359551 |             |             |           |           |
| ENSG00000104375 | 0.38922156 | 0.39937107 | 0.38922156 | 0.399371069 | 0.494047619 | 0.4464286 | 0.4821429 |
| ENSG00000143079 |            | 0.20426829 |            | 0.204268293 |             |           | 0.4821429 |
| ENSG00000166913 | 0.45       | 0.08181818 | 0.45       | 0.081818182 | 0.072289157 | 0.1337209 |           |
| ENSG00000128335 | 0.31736527 | 0.45398773 | 0.31736527 | 0.45398773  | 0.172619048 | 0.1569767 | 0.0609756 |
| ENSG00000178033 |            | 0.41515152 |            | 0.415151515 |             |           | 0.4772727 |
| ENSG00000174446 |            | 0.21666667 |            | 0.216666667 |             |           | 0.2411765 |
| ENSG00000174915 |            | 0.0969697  |            | 0.096969697 |             |           |           |
| ENSG00000122367 |            |            |            |             |             |           | 0.0581395 |
| ENSG00000125861 |            | 0.34242424 |            | 0.342424242 |             |           | 0.494186  |
| ENSG00000172081 |            | 0.36627907 |            | 0.36627907  |             |           | 0.2272727 |
| ENSG00000143473 |            | 0.31976744 |            | 0.319767442 |             |           | 0.4166667 |
| ENSG00000154059 |            | 0.33333333 |            | 0.333333333 |             |           | 0.2906977 |
| ENSG00000153037 | 0.12275449 | 0.43636364 | 0.12275449 | 0.436363636 | 0.30952381  | 0.2470588 | 0.2840909 |
| ENSG00000154262 |            | 0.42777778 |            | 0.427777778 |             |           | 0.244186  |
| ENSG00000128710 | 0.35628743 |            | 0.35628743 |             |             |           |           |
| ENSG00000136997 | 0.06886228 |            | 0.06886228 |             | 0.130952381 | 0.127907  | 0.1136364 |
| ENSG00000033122 |            |            |            |             | 0.107142857 | 0.1860465 |           |
| ENSG00000032219 |            | 0.08282209 |            | 0.082822086 |             |           |           |
| ENSG00000134072 |            | 0.1402439  |            | 0.140243902 |             |           |           |
| ENSG00000166136 | 0.13888889 |            | 0.13888889 |             | 0.133333333 | 0.1777778 |           |
| ENSG00000198598 | 0.18862275 |            | 0.18862275 |             | 0.30952381  | 0.4244186 | 0.2948718 |
| ENSG00000100100 |            | 0.24137931 |            | 0.24137931  |             |           | 0.3895349 |
| ENSG00000080007 | 0.48850575 | 0.42424242 | 0.48850575 | 0.424242424 | 0.211111111 | 0.2954545 | 0.4705882 |
| ENSG00000170577 |            | 0.12424242 |            | 0.124242424 |             |           |           |
| ENSG00000167904 | 0.48333333 | 0.37804878 | 0.48333333 | 0.37804878  | 0.311111111 | 0.3409091 | 0.3837209 |
| ENSG00000122483 | 0.25568182 | 0.17777778 | 0.25568182 | 0.177777778 | 0.273809524 | 0.3081395 | 0.2613636 |
| ENSG00000181518 |            | 0.31097561 |            | 0.31097561  |             |           | 0.2588235 |
| ENSG00000100124 |            | 0.17222222 |            | 0.172222222 |             |           |           |
| ENSG00000124143 | 0.12359551 | 0.4030303  | 0.12359551 | 0.403030303 |             |           | 0.4090909 |
| ENSG00000204351 | 0.12275449 | 0.29393939 | 0.12275449 | 0.293939394 |             | 0.0755814 | 0.377907  |
| ENSG00000214717 |            | 0.46969697 |            | 0.46969697  |             |           | 0.425     |
| ENSG00000135744 | 0.11890244 | 0.33939394 | 0.11890244 | 0.339393939 | 0.214285714 | 0.1686047 | 0.122093  |
| ENSG00000137077 |            |            |            |             | 0.068181818 |           |           |
| ENSG00000133872 |            | 0.12727273 |            | 0.127272727 |             |           | 0.1860465 |
| ENSG00000173250 |            | 0.36280488 |            | 0.362804878 |             |           | 0.2529412 |
| ENSG00000156234 |            | 0.13939394 |            | 0.139393939 |             |           | 0.0581395 |
| ENSG00000125848 |            | 0.25555556 |            | 0.255555556 | 0.05952381  | 0.0988372 | 0.3295455 |
| ENSG00000129484 |            | 0.24848485 |            | 0.248484848 |             |           | 0.244186  |

|                 |            |            |            |             |             |           |           |
|-----------------|------------|------------|------------|-------------|-------------|-----------|-----------|
| ENSG00000166260 |            | 0.38181818 |            | 0.381818182 |             |           | 0.1918605 |
| ENSG00000189275 | 0.4246988  | 0.48101266 | 0.4246988  | 0.481012658 | 0.458333333 | 0.4709302 | 0.4878049 |
| ENSG00000176531 |            | 0.29393939 |            | 0.293939394 |             |           | 0.1511628 |
| ENSG00000102409 |            | 0.34567901 |            | 0.345679012 | 0.05952381  | 0.1511628 | 0.25      |
| ENSG00000178217 |            | 0.19090909 |            | 0.190909091 |             |           | 0.2674419 |
| ENSG00000118160 |            | 0.22392638 |            | 0.22392638  | 0.060240964 |           | 0.2840909 |
| ENSG00000112851 |            | 0.09659091 |            | 0.096590909 |             | 0.0681818 | 0.4651163 |
| ENSG00000145916 |            | 0.43333333 |            | 0.433333333 |             |           | 0.1104651 |
| ENSG00000205420 |            | 0.31609195 |            | 0.316091954 |             |           | 0.25      |
| ENSG00000105220 |            | 0.42424242 |            | 0.424242424 |             |           | 0.4593023 |
| ENSG00000198951 | 0.49431818 | 0.49393939 | 0.49431818 | 0.493939394 | 0.2         | 0.1818182 | 0.1802326 |
| ENSG00000112137 |            | 0.29090909 |            | 0.290909091 |             |           | 0.4127907 |
| ENSG00000093000 | 0.33832335 | 0.48170732 | 0.33832335 | 0.481707317 | 0.494047619 | 0.4709302 | 0.4764706 |
| ENSG00000110075 |            | 0.29393939 |            | 0.293939394 |             |           | 0.25      |
| ENSG00000170255 | 0.26704545 |            | 0.26704545 |             | 0.2375      | 0.2738095 |           |
| ENSG00000137185 | 0.20555556 | 0.34848485 | 0.20555556 | 0.348484848 | 0.255555556 | 0.3181818 | 0.3837209 |
| ENSG00000104731 |            | 0.17987805 |            | 0.179878049 |             | 0.1511628 | 0.127907  |
| ENSG00000164989 | 0.43712575 | 0.47777778 | 0.43712575 | 0.477777778 | 0.392857143 | 0.4651163 | 0.4318182 |
| ENSG00000173451 | 0.11976048 | 0.26363636 | 0.11976048 | 0.263636364 |             |           | 0.1802326 |
| ENSG00000203876 |            | 0.08181818 |            | 0.081818182 |             |           | 0.3197674 |
| ENSG00000105443 | 0.41916168 |            | 0.41916168 |             | 0.452380952 | 0.4767442 |           |
| ENSG00000173456 | 0.23053892 | 0.18944099 | 0.23053892 | 0.189440994 | 0.160714286 | 0.2383721 | 0.0588235 |
| ENSG00000204544 |            | 0.25151515 |            | 0.251515152 |             |           | 0.1511628 |
| ENSG00000257242 | 0.16111111 |            | 0.16111111 |             |             |           |           |
| ENSG00000112531 | 0.46107784 | 0.46341463 | 0.46107784 | 0.463414634 |             |           | 0.3604651 |
| ENSG00000151287 |            | 0.17878788 |            | 0.178787879 |             |           | 0.4127907 |
| ENSG00000147885 |            | 0.05454545 |            | 0.054545455 |             |           | 0.1046512 |
| ENSG00000112335 |            |            |            |             |             |           | 0.1046512 |
| ENSG00000204161 |            | 0.47272727 |            | 0.472727273 |             |           | 0.3081395 |
| ENSG00000254122 |            | 0.20224719 |            | 0.202247191 |             |           | 0.1477273 |
| ENSG00000131931 |            | 0.06666667 |            | 0.066666667 |             |           |           |
| ENSG00000012963 | 0.17701863 | 0.47272727 | 0.17701863 | 0.472727273 | 0.15        | 0.1011905 | 0.3430233 |
| ENSG00000116254 | 0.48314607 | 0.35454545 | 0.48314607 | 0.354545455 | 0.404761905 | 0.4302326 | 0.4534884 |
| ENSG00000221838 |            | 0.37878788 |            | 0.378787879 |             |           | 0.1337209 |
| ENSG00000162728 |            | 0.35151515 |            | 0.351515152 |             |           | 0.1860465 |
| ENSG00000186340 |            | 0.48787879 |            | 0.487878788 |             |           | 0.4767442 |
| ENSG00000100299 |            | 0.10606061 |            | 0.106060606 |             |           |           |
| ENSG00000115756 | 0.47159091 | 0.44207317 | 0.47159091 | 0.442073171 | 0.322222222 | 0.3571429 | 0.372093  |
| ENSG00000100336 | 0.45808383 | 0.49438202 | 0.45808383 | 0.494382022 | 0.178571429 | 0.2151163 | 0.2650602 |
| ENSG00000170956 |            | 0.44171779 |            | 0.441717791 |             |           | 0.4886364 |
| ENSG00000185298 |            | 0.40184049 |            | 0.401840491 |             |           | 0.3546512 |
| ENSG00000174173 | 0.48502994 | 0.06666667 | 0.48502994 | 0.066666667 | 0.077777778 |           | 0.2159091 |
| ENSG00000104537 | 0.09580838 | 0.34337349 | 0.09580838 | 0.343373494 |             |           | 0.3837209 |
| ENSG00000128578 |            | 0.25757576 |            | 0.257575758 |             |           | 0.2965116 |
| ENSG00000163754 |            | 0.29444444 |            | 0.294444444 |             |           | 0.3295455 |
| ENSG00000188580 |            | 0.125      |            | 0.125       |             |           | 0.1058824 |
| ENSG00000111325 |            | 0.33333333 |            | 0.333333333 |             |           | 0.3313953 |
| ENSG00000166391 | 0.25149701 |            | 0.25149701 |             | 0.119047619 | 0.1686047 | 0.0523256 |
| ENSG00000166340 | 0.13173653 | 0.24390244 | 0.13173653 | 0.243902439 |             |           | 0.0813953 |
| ENSG00000188729 |            | 0.5        |            | 0.5         |             |           | 0.1569767 |
| ENSG00000166676 |            | 0.2969697  |            | 0.296969697 |             |           | 0.3837209 |
| ENSG00000213029 | 0.21556886 |            | 0.21556886 |             | 0.386904762 | 0.4647059 |           |
| ENSG00000128802 |            |            |            |             |             |           | 0.1686047 |
| ENSG00000181873 |            | 0.3908046  |            | 0.390804598 |             |           | 0.2840909 |

|                 |            |            |            |             |             |           |           |
|-----------------|------------|------------|------------|-------------|-------------|-----------|-----------|
| ENSG00000171222 |            |            |            |             |             | 0.0523256 |           |
| ENSG0000080845  | 0.14071856 | 0.25151515 | 0.14071856 | 0.251515152 |             |           | 0.4       |
| ENSG00000166323 |            | 0.44545455 |            | 0.445454545 |             |           | 0.4360465 |
| ENSG00000164253 |            | 0.42727273 |            | 0.427272727 |             |           | 0.5       |
| ENSG00000144481 | 0.05       | 0.41111111 | 0.05       | 0.411111111 | 0.3         | 0.1704545 | 0.4117647 |
| ENSG00000146373 | 0.13473054 | 0.43030303 | 0.13473054 | 0.43030303  |             |           | 0.2613636 |
| ENSG00000189164 |            | 0.14545455 |            | 0.145454545 |             |           | 0.3081395 |
| ENSG00000103534 | 0.30555556 | 0.14545455 | 0.30555556 | 0.145454545 |             |           | 0.2209302 |
| ENSG00000083312 |            | 0.36969697 |            | 0.36969697  | 0.337209302 | 0.3222222 | 0.3604651 |
| ENSG00000205126 |            | 0.22424242 |            | 0.224242424 |             |           | 0.1529412 |
| ENSG00000168778 | 0.13772455 |            | 0.13772455 |             |             |           |           |
| ENSG00000108828 |            | 0.31515152 |            | 0.315151515 |             |           | 0.0639535 |
| ENSG00000139187 |            | 0.34444444 |            | 0.344444444 |             |           | 0.4777778 |
| ENSG00000176040 |            | 0.07012195 |            | 0.070121951 |             |           |           |
| ENSG00000179918 |            |            |            |             |             |           | 0.0755814 |
| ENSG00000137161 |            | 0.26666667 |            | 0.266666667 | 0.475609756 | 0.4418605 |           |
| ENSG00000185345 | 0.08982036 | 0.13636364 | 0.08982036 | 0.136363636 | 0.404761905 | 0.3941176 | 0.0755814 |
| ENSG00000118900 | 0.24096386 | 0.42948718 | 0.24096386 | 0.429487179 |             |           | 0.3488372 |
| ENSG00000204752 | 0.31137725 |            | 0.31137725 |             | 0.113095238 | 0.1046512 |           |
| ENSG00000132286 | 0.25       | 0.46363636 | 0.25       | 0.463636364 |             | 0.0568182 | 0.244186  |
| ENSG00000143434 | 0.28977273 | 0.19393939 | 0.28977273 | 0.193939394 | 0.066666667 | 0.1104651 | 0.1046512 |
| ENSG00000005436 |            | 0.45402299 |            | 0.454022989 |             |           | 0.3295455 |
| ENSG00000002834 |            | 0.37575758 |            | 0.375757576 |             |           | 0.4764706 |
| ENSG00000173011 | 0.25595238 | 0.23333333 | 0.25595238 | 0.233333333 | 0.291666667 | 0.4011628 | 0.3636364 |
| ENSG00000005187 | 0.06586826 |            | 0.06586826 |             |             |           |           |
| ENSG00000181552 |            | 0.42721519 |            | 0.42721519  |             |           | 0.2383721 |
| ENSG00000186501 |            | 0.44817073 |            | 0.448170732 |             |           | 0.3488372 |
| ENSG00000106460 | 0.21590909 | 0.44545455 | 0.21590909 | 0.445454545 | 0.311111111 | 0.4204545 | 0.4529412 |
| ENSG00000119139 | 0.17065868 | 0.42073171 | 0.17065868 | 0.420731707 |             |           | 0.3764706 |
| ENSG00000158457 |            | 0.20555556 |            | 0.205555556 |             |           | 0.1453488 |
| ENSG00000136169 |            | 0.40909091 |            | 0.409090909 |             |           | 0.4883721 |
| ENSG00000197226 |            | 0.39772727 |            | 0.397727273 |             |           | 0.3546512 |
| ENSG00000129422 | 0.21556886 | 0.42121212 | 0.21556886 | 0.421212121 | 0.428571429 | 0.4883721 | 0.4127907 |
| ENSG00000164338 | 0.41616766 | 0.2        | 0.41616766 | 0.2         | 0.232142857 | 0.0930233 | 0.0930233 |
| ENSG00000111261 | 0.47005988 | 0.23939394 | 0.47005988 | 0.239393939 | 0.363095238 | 0.4767442 | 0.1802326 |
| ENSG00000123106 |            | 0.33030303 |            | 0.33030303  | 0.088888889 | 0.1333333 | 0.3662791 |
| ENSG00000090006 | 0.35795455 | 0.36969697 | 0.35795455 | 0.36969697  | 0.339285714 | 0.3488372 | 0.2882353 |
| ENSG00000243440 |            | 0.41818182 |            | 0.418181818 |             |           | 0.4302326 |
| ENSG00000147576 |            | 0.46341463 |            | 0.463414634 |             |           | 0.4940476 |
| ENSG00000146842 |            | 0.2030303  |            | 0.203030303 |             |           | 0.3863636 |
| ENSG00000254093 |            | 0.29012346 |            | 0.290123457 |             |           | 0.0813953 |
| ENSG00000114541 | 0.48192771 |            | 0.48192771 |             | 0.331325301 | 0.3837209 | 0.372093  |
| ENSG00000185504 | 0.49101796 | 0.26060606 | 0.49101796 | 0.260606061 | 0.398809524 | 0.4883721 | 0.3604651 |
| ENSG00000173838 | 0.4494382  | 0.46666667 | 0.4494382  | 0.466666667 | 0.333333333 | 0.3222222 | 0.2383721 |
| ENSG00000198865 |            | 0.3030303  |            | 0.303030303 | 0.244444444 | 0.3555556 | 0.3392857 |
| ENSG00000134853 |            | 0.16060606 |            | 0.160606061 |             |           | 0.2151163 |
| ENSG00000187689 | 0.14759036 |            | 0.14759036 |             |             |           |           |
| ENSG00000165511 |            | 0.11212121 |            | 0.112121212 |             |           | 0.2209302 |
| ENSG00000033327 | 0.38922156 | 0.15757576 | 0.38922156 | 0.157575758 | 0.357142857 | 0.4825581 | 0.4705882 |
| ENSG00000092208 | 0.15868263 |            | 0.15868263 |             | 0.375       | 0.3662791 |           |
| ENSG00000178764 | 0.12874251 | 0.46969697 | 0.12874251 | 0.46969697  | 0.136904762 | 0.127907  | 0.3255814 |
| ENSG00000170627 | 0.22590361 | 0.0969697  | 0.22590361 | 0.096969697 | 0.05952381  | 0.0988372 | 0.0988372 |
| ENSG00000152894 |            | 0.38484848 |            | 0.384848485 |             |           | 0.3488372 |
| ENSG00000084093 |            | 0.27777778 |            | 0.277777778 |             |           |           |

|                 |            |            |            |             |             |           |           |
|-----------------|------------|------------|------------|-------------|-------------|-----------|-----------|
| ENSG00000134343 | 0.23192771 | 0.45151515 | 0.23192771 | 0.451515152 | 0.466666667 | 0.5       | 0.3953488 |
| ENSG00000182580 |            | 0.22327044 |            | 0.22327044  |             |           | 0.2083333 |
| ENSG00000167765 | 0.26047904 | 0.20909091 | 0.26047904 | 0.209090909 |             |           | 0.2732558 |
| ENSG00000183091 | 0.43072289 |            | 0.43072289 |             | 0.477777778 | 0.4593023 |           |
| ENSG0000005020  |            | 0.40490798 |            | 0.404907975 | 0.119047619 | 0.122093  | 0.1785714 |
| ENSG0000023041  | 0.45209581 | 0.0872093  | 0.45209581 | 0.087209302 | 0.452380952 | 0.4360465 | 0.2093023 |
| ENSG00000103152 | 0.1497006  |            | 0.1497006  |             | 0.119047619 | 0.122093  |           |
| ENSG00000104365 | 0.07222222 |            | 0.07222222 |             | 0.444444444 | 0.4545455 | 0.0568182 |
| ENSG00000159873 |            | 0.33841463 |            | 0.338414634 | 0.122222222 | 0.125     | 0.3809524 |
| ENSG00000172728 | 0.11377246 |            | 0.11377246 |             | 0.054878049 |           | 0.1337209 |
| ENSG00000093183 | 0.36144578 | 0.32727273 | 0.36144578 | 0.327272727 | 0.476190476 | 0.4825581 | 0.4825581 |
| ENSG00000187954 | 0.32222222 | 0.48170732 | 0.32222222 | 0.481707317 | 0.470238095 | 0.4534884 | 0.3522727 |
| ENSG00000071991 |            | 0.33636364 |            | 0.336363636 |             |           | 0.3809524 |
| ENSG00000189362 | 0.29640719 | 0.43597561 | 0.29640719 | 0.43597561  | 0.476190476 | 0.3372093 | 0.4464286 |
| ENSG00000139428 |            | 0.46363636 |            | 0.463636364 |             |           | 0.2840909 |
| ENSG00000157680 |            | 0.46969697 |            | 0.46969697  |             |           | 0.4709302 |
| ENSG00000164715 |            | 0.15454545 |            | 0.154545455 |             |           | 0.3023256 |
| ENSG00000159658 | 0.39520958 | 0.28963415 | 0.39520958 | 0.289634146 | 0.267857143 | 0.2117647 | 0.4011628 |
| ENSG00000070610 | 0.41111111 |            | 0.41111111 |             | 0.386363636 | 0.3662791 |           |
| ENSG00000139160 |            | 0.47575758 |            | 0.475757576 |             |           | 0.2151163 |
| ENSG00000183072 |            | 0.35757576 |            | 0.357575758 |             |           | 0.1046512 |
| ENSG00000085276 | 0.38372093 | 0.39939024 | 0.38372093 | 0.399390244 | 0.494047619 | 0.4883721 | 0.2440476 |
| ENSG00000181908 |            | 0.34545455 |            | 0.345454545 |             |           | 0.25      |
| ENSG00000109586 |            |            |            |             |             |           | 0.1511628 |
| ENSG00000246477 |            | 0.43030303 |            | 0.43030303  |             |           | 0.3352941 |
| ENSG00000167216 | 0.4251497  |            | 0.4251497  |             | 0.458333333 | 0.494186  |           |
| ENSG00000118960 |            | 0.38787879 |            | 0.387878788 |             |           | 0.4476744 |
| ENSG00000131019 |            | 0.43636364 |            | 0.436363636 |             |           | 0.372093  |
| ENSG00000133105 |            | 0.43333333 |            | 0.433333333 |             |           | 0.2176471 |
| ENSG00000164500 |            | 0.27575758 |            | 0.275757576 |             |           |           |
| ENSG00000125945 |            | 0.22530864 |            | 0.225308642 |             |           | 0.2848837 |
| ENSG00000152936 | 0.46686747 |            | 0.46686747 |             | 0.273809524 | 0.2151163 |           |
| ENSG00000074319 |            |            |            |             | 0.211111111 | 0.3977273 | 0.0666667 |
| ENSG00000135040 |            | 0.21666667 |            | 0.216666667 |             |           | 0.4318182 |
| ENSG00000196091 |            | 0.44242424 |            | 0.442424242 |             |           | 0.372093  |
| ENSG00000198883 | 0.20555556 |            | 0.20555556 |             |             |           |           |
| ENSG00000118689 | 0.15555556 | 0.28181818 | 0.15555556 | 0.281818182 | 0.2         | 0.2045455 | 0.1918605 |
| ENSG00000147689 | 0.33333333 |            | 0.33333333 |             | 0.186746988 | 0.2325581 |           |
| ENSG00000137959 | 0.12650602 |            | 0.12650602 |             | 0.476190476 | 0.4651163 |           |
| ENSG00000188994 |            | 0.47777778 |            | 0.477777778 |             |           | 0.4651163 |
| ENSG00000101916 | 0.26807229 | 0.19444444 | 0.26807229 | 0.194444444 | 0.208333333 | 0.2209302 |           |
| ENSG00000111145 |            |            |            |             |             |           | 0.1511628 |
| ENSG00000120896 |            | 0.46060606 |            | 0.460606061 |             |           | 0.2965116 |
| ENSG00000205307 |            |            |            |             | 0.261904762 | 0.2965116 |           |
| ENSG00000158169 | 0.11797753 | 0.43939394 | 0.11797753 | 0.439393939 | 0.122222222 | 0.0909091 | 0.4578313 |
| ENSG00000141380 | 0.17613636 | 0.18888889 | 0.17613636 | 0.188888889 | 0.144444444 | 0.0555556 |           |
| ENSG00000100726 | 0.23353293 | 0.21111111 | 0.23353293 | 0.211111111 | 0.488095238 | 0.4705882 | 0.3977273 |
| ENSG00000112212 | 0.27245509 |            | 0.27245509 |             | 0.259036145 | 0.2325581 |           |
| ENSG00000213906 | 0.15361446 |            | 0.15361446 |             | 0.154761905 | 0.1764706 |           |
| ENSG00000057294 |            | 0.34242424 |            | 0.342424242 |             |           | 0.1860465 |
| ENSG00000117143 |            |            |            |             | 0.337349398 | 0.255814  |           |
| ENSG00000185247 |            | 0.42424242 |            | 0.424242424 |             |           |           |
| ENSG00000197971 |            | 0.41666667 |            | 0.416666667 |             |           | 0.4       |
| ENSG00000146197 |            | 0.16666667 |            | 0.166666667 |             |           | 0.2093023 |

|                 |            |            |            |             |             |           |           |
|-----------------|------------|------------|------------|-------------|-------------|-----------|-----------|
| ENSG00000182541 | 0.48203593 | 0.29393939 | 0.48203593 | 0.293939394 |             |           | 0.4767442 |
| ENSG00000162413 | 0.1        | 0.33231707 | 0.1        | 0.332317073 | 0.4         | 0.4111111 | 0.4457831 |
| ENSG00000110888 |            | 0.43888889 |            | 0.438888889 | 0.28313253  | 0.3117647 | 0.4659091 |
| ENSG00000112787 |            | 0.18484848 |            | 0.184848485 |             |           | 0.1802326 |
| ENSG00000120647 | 0.37125749 | 0.23939394 | 0.37125749 | 0.239393939 | 0.327380952 | 0.3197674 | 0.3837209 |
| ENSG00000171161 | 0.0754717  | 0.06363636 | 0.0754717  | 0.063636364 |             |           | 0.1627907 |
| ENSG00000137198 |            | 0.27777778 |            | 0.277777778 |             |           | 0.0888889 |
| ENSG00000065150 | 0.18390805 | 0.48780488 | 0.18390805 | 0.487804878 | 0.2         | 0.2045455 | 0.25      |
| ENSG00000066248 |            | 0.34242424 |            | 0.342424242 |             |           | 0.4545455 |
| ENSG00000099995 |            | 0.20909091 |            | 0.209090909 |             |           | 0.3139535 |
| ENSG00000132953 |            | 0.43333333 |            | 0.433333333 |             |           | 0.1918605 |
| ENSG00000151062 |            | 0.42727273 |            | 0.427272727 |             |           | 0.494186  |
| ENSG00000256060 | 0.26111111 |            | 0.26111111 |             | 0.266666667 | 0.3409091 |           |
| ENSG00000255087 |            | 0.4969697  |            | 0.496969697 |             |           | 0.1686047 |
| ENSG00000170291 |            | 0.4        |            | 0.4         |             |           | 0.372093  |
| ENSG00000157064 |            | 0.11212121 |            | 0.112121212 |             |           | 0.4360465 |
| ENSG00000160305 |            | 0.1882716  |            | 0.188271605 |             |           | 0.3662791 |
| ENSG00000129562 | 0.23053892 | 0.09393939 | 0.23053892 | 0.093939394 | 0.178571429 | 0.1802326 | 0.0872093 |
| ENSG00000004846 | 0.41317365 | 0.34302326 | 0.41317365 | 0.343023256 | 0.095238095 | 0.1046512 | 0.127907  |
| ENSG00000110243 | 0.16467066 | 0.21111111 | 0.16467066 | 0.211111111 | 0.261904762 | 0.372093  | 0.3255814 |
| ENSG00000119650 |            | 0.33636364 |            | 0.336363636 |             |           | 0.3536585 |
| ENSG00000174429 |            | 0.24444444 |            | 0.244444444 |             |           | 0.2272727 |
| ENSG00000171402 |            | 0.37078652 |            | 0.370786517 |             |           | 0.4302326 |
| ENSG00000142156 |            | 0.13109756 |            | 0.131097561 |             |           | 0.0813953 |
| ENSG00000224383 |            | 0.42546584 |            | 0.425465839 |             |           | 0.3529412 |
| ENSG00000196497 |            | 0.49090909 |            | 0.490909091 |             |           | 0.4651163 |
| ENSG00000108344 |            | 0.15116279 |            | 0.151162791 |             |           |           |
| ENSG00000084710 |            | 0.23170732 |            | 0.231707317 |             |           | 0.4127907 |
| ENSG00000203837 | 0.44242424 | 0.05757576 | 0.44242424 | 0.057575758 | 0.410714286 | 0.4939759 | 0.25      |
| ENSG00000196689 | 0.32934132 | 0.44545455 | 0.32934132 | 0.445454545 |             |           | 0.25      |
| ENSG00000143994 |            | 0.16969697 |            | 0.16969697  |             |           | 0.1744186 |
| ENSG00000111716 | 0.24444444 |            | 0.24444444 |             |             |           |           |
| ENSG00000065675 |            | 0.48181818 |            | 0.481818182 |             |           | 0.2383721 |
| ENSG00000164308 | 0.43113772 | 0.49090909 | 0.43113772 | 0.490909091 | 0.375       | 0.494186  | 0.4761905 |
| ENSG00000156500 |            | 0.08484848 |            | 0.084848485 |             |           |           |
| ENSG00000080546 |            | 0.0969697  |            | 0.096969697 |             |           |           |
| ENSG00000122692 |            | 0.46666667 |            | 0.466666667 |             |           | 0.3409091 |
| ENSG00000213397 | 0.20783133 | 0.31097561 | 0.20783133 | 0.31097561  |             |           | 0.3488372 |
| ENSG00000166750 |            | 0.42987805 |            | 0.429878049 |             |           | 0.3235294 |
| ENSG00000064195 | 0.28143713 | 0.13636364 | 0.28143713 | 0.136363636 | 0.397590361 | 0.3289474 | 0.4011628 |
| ENSG00000113575 |            | 0.12424242 |            | 0.124242424 |             |           | 0.4941176 |
| ENSG00000145391 |            | 0.19393939 |            | 0.193939394 |             |           |           |
| ENSG00000159202 |            | 0.49393939 |            | 0.493939394 |             |           | 0.2732558 |
| ENSG00000075884 | 0.25449102 |            | 0.25449102 |             | 0.291666667 | 0.3023256 |           |
| ENSG00000164048 | 0.15       | 0.34848485 | 0.15       | 0.348484848 | 0.144444444 | 0.1590909 | 0.2325581 |
| ENSG00000182557 | 0.42613636 | 0.30909091 | 0.42613636 | 0.309090909 | 0.144444444 | 0.1136364 |           |
| ENSG00000188010 | 0.0748503  | 0.47777778 | 0.0748503  | 0.477777778 | 0.077380952 | 0.0755814 | 0.1931818 |
| ENSG00000164022 | 0.17771084 | 0.21515152 | 0.17771084 | 0.215151515 | 0.136904762 | 0.2764706 | 0.2732558 |
| ENSG00000155252 |            | 0.35151515 |            | 0.351515152 |             |           | 0.4529412 |
| ENSG00000077522 |            | 0.29393939 |            | 0.293939394 |             |           | 0.3068182 |
| ENSG00000153250 | 0.31626506 |            | 0.31626506 |             | 0.154761905 | 0.1511628 |           |
| ENSG00000188293 |            | 0.46363636 |            | 0.463636364 |             |           | 0.4651163 |
| ENSG00000133256 |            | 0.33333333 |            | 0.333333333 |             |           | 0.3941176 |
| ENSG00000138101 | 0.13772455 | 0.37575758 | 0.13772455 | 0.375757576 | 0.452380952 | 0.4244186 |           |



|                 |            |            |            |             |             |           |
|-----------------|------------|------------|------------|-------------|-------------|-----------|
| ENSG00000198788 |            | 0.07058824 |            | 0.070588235 |             | 0.0526316 |
| ENSG00000166902 | 0.08988764 |            | 0.08988764 |             | 0.0666667   |           |
| ENSG00000126878 | 0.13888889 | 0.32317073 | 0.13888889 | 0.323170732 |             | 0.3977273 |
| ENSG00000240563 |            | 0.45151515 |            | 0.451515152 |             | 0.1162791 |
| ENSG00000215455 |            | 0.31460674 |            | 0.314606742 |             | 0.4886364 |
| ENSG00000141431 |            | 0.12424242 |            | 0.124242424 |             | 0.2848837 |
| ENSG00000228835 |            | 0.36666667 |            | 0.366666667 |             | 0.3430233 |
| ENSG00000025796 |            | 0.21518987 |            | 0.215189873 |             | 0.45      |
| ENSG00000116774 |            | 0.2        |            | 0.2         | 0.0697674   | 0.1976744 |
| ENSG00000157734 |            | 0.1554878  |            | 0.155487805 |             | 0.0529412 |
| ENSG00000132570 |            | 0.14848485 |            | 0.148484848 |             | 0.1976744 |
| ENSG00000143740 | 0.41111111 | 0.47222222 | 0.41111111 | 0.472222222 | 0.411111111 | 0.3488372 |
| ENSG00000057757 |            | 0.3969697  |            | 0.396969697 |             | 0.3604651 |
| ENSG00000011083 |            | 0.49090909 |            | 0.490909091 |             | 0.3313953 |
| ENSG00000090863 |            | 0.44545455 |            | 0.445454545 |             | 0.3662791 |
| ENSG00000211445 |            | 0.13030303 |            | 0.13030303  |             | 0.4418605 |
| ENSG00000164363 | 0.19318182 |            | 0.19318182 |             | 0.482142857 | 0.3977273 |
| ENSG00000126752 |            | 0.5        |            | 0.5         |             | 0.4058824 |
| ENSG00000196832 |            | 0.41358025 |            | 0.413580247 |             | 0.3081395 |
| ENSG00000196470 |            | 0.15853659 |            | 0.158536585 |             |           |
| ENSG00000140950 | 0.39520958 | 0.49393939 | 0.39520958 | 0.493939394 | 0.458333333 | 0.4883721 |
| ENSG00000162694 | 0.05688623 | 0.36363636 | 0.05688623 | 0.363636364 | 0.470238095 | 0.3197674 |
| ENSG00000112837 |            | 0.35454545 |            | 0.354545455 |             | 0.1046512 |
| ENSG00000151572 | 0.06325301 | 0.15730337 | 0.06325301 | 0.157303371 |             | 0.2093023 |
| ENSG00000056661 |            | 0.42121212 |            | 0.421212121 |             | 0.3081395 |
| ENSG00000073712 |            | 0.08787879 |            | 0.087878788 |             | 0.2325581 |
| ENSG00000152527 |            | 0.28787879 |            | 0.287878788 |             | 0.122093  |
| ENSG00000154269 |            | 0.25304878 |            | 0.25304878  |             | 0.3647059 |
| ENSG00000231171 |            | 0.1433121  |            | 0.143312102 |             | 0.2058824 |
| ENSG00000081870 |            | 0.12121212 |            | 0.121212121 |             | 0.060241  |
| ENSG00000106012 |            | 0.4847561  |            | 0.484756098 |             | 0.5       |
| ENSG00000100324 |            | 0.3030303  |            | 0.303030303 |             |           |
| ENSG00000126351 |            | 0.12777778 |            | 0.127777778 |             | 0.4207317 |
| ENSG00000164638 |            | 0.20588235 |            | 0.205882353 |             | 0.0813953 |
| ENSG00000149201 | 0.20783133 | 0.25609756 | 0.20783133 | 0.256097561 | 0.279761905 | 0.2616279 |
| ENSG00000167711 |            | 0.44242424 |            | 0.442424242 |             | 0.4593023 |
| ENSG00000107771 |            | 0.47777778 |            | 0.477777778 |             | 0.4695122 |
| ENSG00000122679 |            | 0.31212121 |            | 0.312121212 |             | 0.1046512 |
| ENSG00000248050 |            | 0.09393939 |            | 0.093939394 |             |           |
| ENSG00000197935 |            | 0.17222222 |            | 0.172222222 |             | 0.125     |
| ENSG00000092203 | 0.49401198 | 0.25454545 | 0.49401198 | 0.254545455 | 0.267857143 | 0.2209302 |
| ENSG00000008256 | 0.19760479 | 0.18484848 | 0.19760479 | 0.184848485 | 0.297619048 | 0.2378049 |
| ENSG00000180532 | 0.27586207 |            | 0.27586207 |             | 0.255555556 | 0.1931818 |
| ENSG00000151692 |            | 0.47575758 |            | 0.475757576 |             | 0.1686047 |
| ENSG00000176619 |            | 0.48809524 |            | 0.488095238 |             | 0.4883721 |
| ENSG00000237521 |            | 0.18484848 |            | 0.184848485 |             | 0.4360465 |
| ENSG00000112695 | 0.15868263 |            | 0.15868263 |             | 0.220238095 | 0.1744186 |
| ENSG00000188033 | 0.19631902 | 0.34444444 | 0.19631902 | 0.344444444 | 0.136904762 | 0.2352941 |
| ENSG00000110628 | 0.14371257 |            | 0.14371257 |             | 0.238095238 | 0.2790698 |
| ENSG00000182111 |            | 0.41666667 |            | 0.416666667 |             | 0.4883721 |
| ENSG00000143575 |            |            |            | 0.445783133 |             | 0.4156627 |
| ENSG00000131808 |            | 0.35757576 |            | 0.357575758 |             | 0.3139535 |
| ENSG00000167987 |            | 0.43636364 |            | 0.436363636 |             |           |
| ENSG00000135838 |            | 0.07272727 |            | 0.072727273 |             | 0.1860465 |

|                 |            |            |            |             |             |           |           |
|-----------------|------------|------------|------------|-------------|-------------|-----------|-----------|
| ENSG00000196967 |            | 0.36666667 |            | 0.36666667  |             |           | 0.1162791 |
| ENSG00000120664 | 0.4251497  |            | 0.4251497  |             | 0.220238095 |           | 0.2093023 |
| ENSG00000115816 | 0.1497006  |            | 0.1497006  |             | 0.404761905 |           | 0.4709302 |
| ENSG00000236032 | 0.39102564 |            | 0.39102564 |             | 0.452380952 |           | 0.3409091 |
| ENSG00000142173 | 0.30239521 | 0.42528736 | 0.30239521 | 0.425287356 | 0.089285714 |           | 0.5       |
| ENSG00000099910 |            | 0.35151515 |            | 0.351515152 |             |           | 0.4772727 |
| ENSG00000082497 |            | 0.10736196 |            | 0.107361963 |             |           | 0.122093  |
| ENSG00000196337 | 0.49438202 |            | 0.49438202 |             | 0.355555556 |           | 0.3181818 |
| ENSG00000163939 | 0.05120482 | 0.33231707 | 0.05120482 | 0.332317073 |             |           | 0.494186  |
| ENSG00000130939 | 0.0988024  |            | 0.0988024  |             | 0.380952381 |           | 0.2965116 |
| ENSG00000155959 |            | 0.25776398 |            | 0.257763975 |             |           | 0.1395349 |
| ENSG00000134030 |            | 0.2        |            | 0.2         |             |           | 0.1647059 |
| ENSG00000134900 |            | 0.48787879 |            | 0.487878788 |             |           | 0.4651163 |
| ENSG00000014138 |            | 0.08333333 |            | 0.083333333 |             |           |           |
| ENSG00000146592 |            | 0.19512195 |            | 0.195121951 |             |           | 0.3255814 |
| ENSG00000084733 |            | 0.23888889 |            | 0.238888889 |             |           | 0.1363636 |
| ENSG00000104805 | 0.49438202 | 0.29393939 | 0.49438202 | 0.293939394 |             | 0.1590909 | 0.372093  |
| ENSG00000163825 |            |            |            |             | 0.05952381  |           |           |
| ENSG00000147383 |            | 0.2030303  |            | 0.203030303 |             |           | 0.0529412 |
| ENSG00000182459 |            | 0.36196319 |            | 0.36196319  |             | 0.0666667 | 0.4470588 |
| ENSG00000236669 |            | 0.45402299 |            | 0.454022989 |             |           | 0.375     |
| ENSG00000047597 |            | 0.14044944 |            | 0.140449438 |             |           |           |
| ENSG00000125780 |            | 0.4        |            | 0.4         |             |           | 0.1162791 |
| ENSG00000204580 | 0.3258427  | 0.4030303  | 0.3258427  | 0.403030303 | 0.452380952 | 0.3977273 | 0.4534884 |
| ENSG00000134389 | 0.48502994 | 0.47515528 | 0.48502994 | 0.47515528  |             |           | 0.1627907 |
| ENSG00000163389 |            | 0.28333333 |            | 0.283333333 |             |           | 0.2954545 |
| ENSG00000172986 |            | 0.39090909 |            | 0.390909091 |             |           | 0.4825581 |
| ENSG00000101222 | 0.17964072 |            | 0.17964072 |             | 0.261904762 | 0.255814  | 0.122093  |
| ENSG00000020256 |            | 0.17261905 |            | 0.172619048 |             |           |           |
| ENSG00000178685 | 0.32934132 |            | 0.32934132 |             | 0.166666667 | 0.1453488 |           |
| ENSG00000178075 |            |            |            |             | 0.357142857 | 0.3081395 |           |
| ENSG00000132563 |            | 0.47484277 |            | 0.474842767 |             |           | 0.2261905 |
| ENSG00000144681 |            | 0.17272727 |            | 0.172727273 |             |           | 0.244186  |
| ENSG00000170915 | 0.36666667 | 0.25757576 | 0.36666667 | 0.257575758 | 0.255555556 | 0.2555556 | 0.4651163 |
| ENSG00000050130 | 0.41916168 | 0.21212121 | 0.41916168 | 0.212121212 | 0.130952381 | 0.1511628 | 0.1511628 |
| ENSG00000198466 | 0.10479042 | 0.39329268 | 0.10479042 | 0.393292683 | 0.214285714 | 0.1337209 | 0.4886364 |
| ENSG00000138834 |            | 0.46319018 |            | 0.463190184 |             |           | 0.327381  |
| ENSG00000117751 | 0.42814371 |            | 0.42814371 |             | 0.267857143 | 0.2093023 |           |
| ENSG00000131584 |            |            |            |             |             |           | 0.4244186 |
| ENSG00000151164 |            |            |            |             |             |           | 0.0755814 |
| ENSG00000151552 |            | 0.35757576 |            | 0.357575758 |             |           | 0.4767442 |
| ENSG00000153832 |            | 0.41212121 |            | 0.412121212 | 0.148809524 | 0.2267442 | 0.2848837 |
| ENSG00000136110 |            | 0.07272727 |            | 0.072727273 |             |           |           |
| ENSG00000163867 |            |            |            |             |             |           | 0.3895349 |
| ENSG00000233701 |            | 0.05757576 |            | 0.057575758 |             |           |           |
| ENSG00000144730 | 0.44886364 | 0.21515152 | 0.44886364 | 0.215151515 | 0.066666667 | 0.1136364 | 0.5       |
| ENSG00000146707 |            |            |            |             |             |           | 0.3977273 |
| ENSG00000130711 |            | 0.09090909 |            | 0.090909091 |             |           | 0.4593023 |
| ENSG00000128536 | 0.26047904 | 0.42121212 | 0.26047904 | 0.421212121 | 0.5         | 0.4767442 | 0.2790698 |
| ENSG00000136146 |            |            |            |             |             |           | 0.0523256 |
| ENSG00000107742 |            | 0.48295455 |            | 0.482954545 |             |           | 0.4593023 |
| ENSG00000145388 |            |            |            |             | 0.101190476 | 0.0523256 |           |
| ENSG00000169876 |            | 0.48484848 |            | 0.484848485 |             |           | 0.3139535 |
| ENSG00000105607 |            | 0.42236025 |            | 0.422360248 |             |           | 0.1686047 |

|                 |            |            |            |             |             |           |           |
|-----------------|------------|------------|------------|-------------|-------------|-----------|-----------|
| ENSG00000213859 |            | 0.16564417 |            | 0.165644172 |             |           | 0.1488095 |
| ENSG00000170248 |            | 0.44705882 |            | 0.447058824 |             |           | 0.3888889 |
| ENSG00000125351 |            | 0.06603774 |            | 0.066037736 |             |           |           |
| ENSG0000023608  | 0.28089888 |            | 0.28089888 |             | 0.233333333 | 0.2777778 |           |
| ENSG00000091181 | 0.37650602 | 0.49695122 | 0.37650602 | 0.49695122  | 0.452380952 | 0.2674419 | 0.2325581 |
| ENSG00000136758 | 0.28915663 | 0.17272727 | 0.28915663 | 0.172727273 | 0.403614458 | 0.3604651 | 0.2848837 |
| ENSG00000168397 |            | 0.28658537 |            | 0.286585366 |             |           | 0.4883721 |
| ENSG00000157014 | 0.07185629 | 0.44242424 | 0.07185629 | 0.442424242 |             |           | 0.3647059 |
| ENSG00000167644 | 0.14071856 |            | 0.14071856 |             | 0.422619048 | 0.4593023 |           |
| ENSG00000158747 |            | 0.28787879 |            | 0.287878788 |             |           | 0.4476744 |
| ENSG00000105974 |            | 0.25       |            | 0.25        |             |           | 0.5       |
| ENSG00000101825 |            | 0.06321839 |            | 0.063218391 |             |           |           |
| ENSG00000167757 |            | 0.18484848 |            | 0.184848485 |             | 0.0529412 | 0.3546512 |
| ENSG00000159261 | 0.11976048 |            | 0.11976048 |             |             |           |           |
| ENSG00000161326 | 0.14670659 | 0.12424242 | 0.14670659 | 0.124242424 | 0.488095238 | 0.3895349 | 0.1569767 |
| ENSG00000221963 |            |            |            |             |             |           | 0.1705882 |
| ENSG00000253251 | 0.41916168 |            | 0.41916168 |             | 0.396341463 | 0.3571429 |           |
| ENSG00000101327 |            | 0.24528302 |            | 0.245283019 |             |           | 0.2529412 |
| ENSG00000132906 | 0.3875     | 0.48787879 | 0.3875     | 0.487878788 | 0.375       | 0.3662791 | 0.3888889 |
| ENSG00000133789 |            | 0.43939394 |            | 0.439393939 |             |           | 0.3197674 |
| ENSG00000115386 |            | 0.43030303 |            | 0.43030303  |             |           | 0.2732558 |
| ENSG00000250317 | 0.10778443 | 0.24848485 | 0.10778443 | 0.248484848 | 0.369047619 | 0.3372093 | 0.3372093 |
| ENSG00000160075 |            | 0.34848485 |            | 0.348484848 | 0.43902439  | 0.4230769 | 0.3837209 |
| ENSG00000176014 | 0.49691358 |            | 0.49691358 |             | 0.39375     | 0.3597561 |           |
| ENSG00000163605 |            | 0.48255814 |            | 0.48255814  |             |           | 0.4709302 |
| ENSG00000080371 |            | 0.21515152 |            | 0.215151515 |             |           | 0.5       |
| ENSG00000103121 | 0.1        |            | 0.1        |             | 0.344444444 | 0.375     | 0.0930233 |
| ENSG00000169085 |            |            |            |             |             |           | 0.2045455 |
| ENSG00000179059 |            | 0.17272727 |            | 0.172727273 |             |           | 0.297619  |
| ENSG00000145832 | 0.28443114 | 0.39393939 | 0.28443114 | 0.393939394 | 0.339285714 | 0.2906977 | 0.2674419 |
| ENSG00000215298 | 0.10778443 | 0.38181818 | 0.10778443 | 0.381818182 | 0.452380952 | 0.4470588 | 0.2209302 |
| ENSG00000163785 | 0.14071856 |            | 0.14071856 |             | 0.44047619  | 0.4825581 | 0.25      |
| ENSG00000240038 | 0.46875    |            | 0.46875    |             | 0.404761905 | 0.3139535 |           |
| ENSG00000141837 |            | 0.45151515 |            | 0.451515152 |             |           | 0.3690476 |
| ENSG00000167637 |            | 0.35227273 |            | 0.352272727 |             |           | 0.4555556 |
| ENSG00000118985 |            | 0.27272727 |            | 0.272727273 |             |           | 0.2613636 |
| ENSG00000114331 |            | 0.31097561 |            | 0.31097561  |             |           | 0.2848837 |
| ENSG00000125878 |            |            |            |             |             |           | 0.2674419 |
| ENSG00000163959 |            | 0.43103448 |            | 0.431034483 |             |           | 0.1818182 |
| ENSG00000228075 |            | 0.32121212 |            | 0.321212121 |             |           | 0.4318182 |
| ENSG00000168993 |            | 0.42528736 |            | 0.425287356 |             |           | 0.3068182 |
| ENSG00000259176 |            |            |            |             |             |           | 0.1428571 |
| ENSG00000154447 | 0.38202247 | 0.17987805 | 0.38202247 | 0.179878049 |             |           | 0.0647059 |
| ENSG00000164175 |            |            |            |             |             |           | 0.4302326 |
| ENSG00000124523 | 0.2754491  |            | 0.2754491  |             | 0.130952381 | 0.1627907 |           |
| ENSG00000180921 |            | 0.14367816 |            | 0.143678161 |             |           | 0.4886364 |
| ENSG00000009335 |            | 0.38484848 |            | 0.384848485 |             |           | 0.4825581 |
| ENSG00000173467 |            | 0.35151515 |            | 0.351515152 |             |           | 0.2965116 |
| ENSG00000188629 | 0.48314607 | 0.45151515 | 0.48314607 | 0.451515152 | 0.477777778 | 0.4090909 | 0.4127907 |
| ENSG00000163518 |            | 0.38888889 |            | 0.388888889 |             |           | 0.4302326 |
| ENSG00000106100 | 0.36526946 | 0.09393939 | 0.36526946 | 0.093939394 | 0.297619048 | 0.4767442 | 0.0755814 |
| ENSG00000204475 |            | 0.05757576 |            | 0.057575758 |             |           | 0.1860465 |
| ENSG00000155868 | 0.13888889 | 0.38181818 | 0.13888889 | 0.381818182 |             |           | 0.2616279 |
| ENSG00000181264 |            | 0.3969697  |            | 0.396969697 |             |           | 0.2965116 |

|                 |            |            |            |             |             |           |           |
|-----------------|------------|------------|------------|-------------|-------------|-----------|-----------|
| ENSG00000145882 |            | 0.4847561  |            | 0.484756098 |             |           | 0.3546512 |
| ENSG00000124574 | 0.11676647 |            | 0.11676647 |             |             | 0.0523256 |           |
| ENSG00000115523 | 0.48802395 | 0.43820225 | 0.48802395 | 0.438202247 | 0.357142857 | 0.3953488 | 0.4555556 |
| ENSG00000198160 |            | 0.28888889 |            | 0.288888889 |             |           | 0.1444444 |
| ENSG00000039537 | 0.17065868 | 0.39329268 | 0.17065868 | 0.393292683 | 0.083333333 | 0.1569767 | 0.1976744 |
| ENSG00000145920 | 0.20359281 | 0.49695122 | 0.20359281 | 0.49695122  | 0.077777778 | 0.1022727 | 0.4244186 |
| ENSG00000103319 |            | 0.10909091 |            | 0.109090909 |             |           | 0.1860465 |
| ENSG00000058729 |            | 0.46666667 |            | 0.466666667 |             |           | 0.494186  |
| ENSG00000149260 |            | 0.47575758 |            | 0.475757576 |             |           | 0.4534884 |
| ENSG00000099204 | 0.10795455 | 0.46666667 | 0.10795455 | 0.466666667 | 0.422619048 | 0.4651163 | 0.4651163 |
| ENSG00000144485 |            |            |            |             |             |           | 0.1402439 |
| ENSG00000165185 |            | 0.30909091 |            | 0.309090909 |             |           | 0.494186  |
| ENSG00000002587 |            | 0.37575758 |            | 0.375757576 |             |           | 0.2965116 |
| ENSG00000196581 |            | 0.38505747 |            | 0.385057471 |             |           | 0.3411765 |
| ENSG00000223474 |            | 0.25460123 |            | 0.254601227 |             |           | 0.3294118 |
| ENSG00000141140 | 0.21084337 | 0.43258427 | 0.21084337 | 0.43258427  | 0.202380952 | 0.0705882 |           |
| ENSG00000198083 |            | 0.33333333 |            | 0.333333333 |             |           | 0.3977273 |
| ENSG00000136986 |            | 0.39308176 |            | 0.393081761 |             |           | 0.4244186 |
| ENSG00000091732 |            | 0.42727273 |            | 0.427272727 |             |           | 0.2848837 |
| ENSG00000166401 | 0.46706587 | 0.46060606 | 0.46706587 | 0.460606061 | 0.231707317 | 0.2411765 | 0.4186047 |
| ENSG00000100629 | 0.39156627 | 0.43518519 | 0.39156627 | 0.435185185 | 0.30952381  | 0.3546512 | 0.3546512 |
| ENSG00000164746 | 0.17365269 | 0.39329268 | 0.17365269 | 0.393292683 | 0.452380952 | 0.3546512 | 0.2325581 |
| ENSG00000123364 |            | 0.27575758 |            | 0.275757576 |             |           | 0.1686047 |
| ENSG00000185689 | 0.1835443  | 0.46363636 | 0.1835443  | 0.463636364 | 0.3         | 0.3154762 | 0.3139535 |
| ENSG00000164530 | 0.4375     | 0.3969697  | 0.4375     | 0.396969697 | 0.466666667 | 0.4476744 | 0.494186  |
| ENSG00000183864 |            |            |            |             |             |           | 0.3372093 |
| ENSG00000205669 | 0.25149701 |            | 0.25149701 |             | 0.357142857 | 0.2732558 |           |
| ENSG00000166483 |            | 0.14329268 |            | 0.143292683 |             |           | 0.244186  |
| ENSG00000078674 |            | 0.41212121 |            | 0.412121212 |             |           | 0.4444444 |
| ENSG00000205036 | 0.47289157 |            | 0.47289157 |             | 0.458333333 | 0.4883721 |           |
| ENSG00000135390 | 0.43820225 |            | 0.43820225 |             | 0.433333333 | 0.3777778 |           |
| ENSG00000165046 | 0.16766467 |            | 0.16766467 |             | 0.375       | 0.3546512 |           |
| ENSG00000095539 |            | 0.48314607 |            | 0.483146067 |             |           | 0.4534884 |
| ENSG00000188158 | 0.38333333 |            | 0.38333333 |             |             |           |           |
| ENSG00000129473 |            | 0.07575758 |            | 0.075757576 |             |           | 0.0930233 |
| ENSG00000154429 |            | 0.4494382  |            | 0.449438202 |             |           | 0.4555556 |
| ENSG00000077458 | 0.2245509  | 0.49056604 | 0.2245509  | 0.490566038 | 0.404761905 | 0.4476744 | 0.422619  |
| ENSG00000163206 | 0.1257485  |            | 0.1257485  |             | 0.422619048 | 0.4418605 |           |
| ENSG00000187866 |            | 0.3969697  |            | 0.396969697 |             |           | 0.3953488 |
| ENSG00000002745 |            | 0.41212121 |            | 0.412121212 |             |           | 0.1569767 |
| ENSG00000134955 |            | 0.43333333 |            | 0.433333333 |             |           | 0.4588235 |
| ENSG00000188641 |            | 0.4969697  |            | 0.496969697 |             |           | 0.4593023 |
| ENSG00000198838 |            | 0.24242424 |            | 0.242424242 |             |           | 0.4411765 |
| ENSG00000163918 | 0.4760479  | 0.17575758 | 0.4760479  | 0.175757576 | 0.410714286 | 0.4476744 | 0.0872093 |
| ENSG00000170312 |            | 0.25617284 |            | 0.25617284  |             |           | 0.5       |
| ENSG00000167196 |            | 0.13939394 |            | 0.139393939 |             |           | 0.1453488 |
| ENSG00000163597 | 0.32222222 | 0.32222222 | 0.32222222 | 0.322222222 | 0.455555556 | 0.4204545 | 0.4593023 |
| ENSG00000176753 |            | 0.38787879 |            | 0.387878788 |             |           | 0.1453488 |
| ENSG00000185966 |            | 0.21818182 |            | 0.218181818 |             |           | 0.2906977 |
| ENSG00000154978 | 0.36826347 | 0.18902439 | 0.36826347 | 0.18902439  | 0.05952381  | 0.0930233 | 0.0697674 |
| ENSG00000120251 | 0.44848485 | 0.44817073 | 0.44848485 | 0.448170732 | 0.160714286 | 0.2142857 | 0.372093  |
| ENSG00000150782 | 0.23053892 |            | 0.23053892 |             | 0.071428571 | 0.1627907 |           |
| ENSG00000168818 | 0.22155689 | 0.15       | 0.22155689 | 0.15        |             |           | 0.0694444 |
| ENSG00000182168 |            | 0.47752809 |            | 0.47752809  |             |           | 0.4111111 |

|                 |            |            |            |             |             |           |           |
|-----------------|------------|------------|------------|-------------|-------------|-----------|-----------|
| ENSG00000157884 |            | 0.48787879 |            | 0.487878788 |             |           | 0.3430233 |
| ENSG00000100344 |            | 0.29090909 |            | 0.290909091 |             |           | 0.4418605 |
| ENSG00000156453 |            | 0.32727273 |            | 0.327272727 |             |           | 0.4476744 |
| ENSG00000185274 | 0.18888889 | 0.14545455 | 0.18888889 | 0.145454545 |             |           |           |
| ENSG00000105258 | 0.23053892 |            | 0.23053892 |             | 0.168674699 |           | 0.2034884 |
| ENSG00000185112 | 0.18562874 |            | 0.18562874 |             | 0.428571429 |           | 0.4883721 |
| ENSG00000116580 |            | 0.36060606 |            | 0.360606061 |             |           | 0.2209302 |
| ENSG00000165887 | 0.28143713 |            | 0.28143713 |             | 0.488888889 |           | 0.4294118 |
| ENSG00000163950 |            | 0.35582822 |            | 0.355828221 |             |           | 0.3214286 |
| ENSG00000123342 |            | 0.2030303  |            | 0.203030303 |             |           | 0.1190476 |
| ENSG00000090889 | 0.38323353 |            | 0.38323353 |             |             |           | 0.0813953 |
| ENSG00000197702 |            | 0.36111111 |            | 0.361111111 |             |           | 0.3181818 |
| ENSG00000197147 |            | 0.25151515 |            | 0.251515152 |             |           | 0.2151163 |
| ENSG00000170558 |            | 0.08841463 |            | 0.088414634 |             |           | 0.3409091 |
| ENSG00000163646 | 0.26347305 | 0.44242424 | 0.26347305 | 0.442424242 | 0.458333333 | 0.5       | 0.2705882 |
| ENSG00000149651 |            | 0.40909091 |            | 0.409090909 |             |           | 0.4476744 |
| ENSG00000250699 | 0.10479042 |            | 0.10479042 |             |             |           |           |
| ENSG00000109536 | 0.4939759  |            | 0.4939759  |             | 0.398809524 |           | 0.3658537 |
| ENSG00000186106 | 0.38323353 | 0.30792683 | 0.38323353 | 0.307926829 | 0.142857143 | 0.122093  | 0.2732558 |
| ENSG00000117724 | 0.16666667 |            | 0.16666667 |             |             |           |           |
| ENSG00000130540 |            | 0.19207317 |            | 0.192073171 |             |           | 0.1104651 |
| ENSG00000095574 | 0.40909091 | 0.16363636 | 0.40909091 | 0.163636364 | 0.133333333 | 0.2159091 | 0.4418605 |
| ENSG00000171014 |            | 0.16363636 |            | 0.163636364 |             |           | 0.2209302 |
| ENSG00000138316 |            | 0.48787879 |            | 0.487878788 |             |           | 0.4555556 |
| ENSG00000078967 |            | 0.14242424 |            | 0.142424242 |             |           | 0.0654762 |
| ENSG00000169871 |            | 0.06060606 |            | 0.060606061 |             |           |           |
| ENSG00000198198 |            | 0.44848485 |            | 0.448484848 |             |           | 0.3895349 |
| ENSG00000169629 | 0.06666667 |            | 0.06666667 |             |             |           |           |
| ENSG00000132676 | 0.12424242 |            | 0.12424242 |             | 0.280487805 |           | 0.2616279 |
| ENSG00000119729 |            | 0.07777778 |            | 0.077777778 |             |           | 0.0697674 |
| ENSG00000171695 |            | 0.28735632 |            | 0.287356322 |             |           | 0.2613636 |
| ENSG00000166529 | 0.06287425 |            | 0.06287425 |             | 0.470238095 |           | 0.494186  |
| ENSG00000138942 |            | 0.29090909 |            | 0.290909091 |             |           | 0.0930233 |
| ENSG00000129625 |            | 0.44545455 |            | 0.445454545 |             |           | 0.3333333 |
| ENSG00000135312 | 0.18888889 |            | 0.18888889 |             | 0.088888889 |           | 0.0666667 |
| ENSG00000183888 |            | 0.15030675 |            | 0.150306748 |             |           |           |
| ENSG00000121766 |            | 0.409375   |            | 0.409375    |             |           | 0.1802326 |
| ENSG00000135913 | 0.40340909 | 0.38181818 | 0.40340909 | 0.381818182 | 0.253012048 | 0.2790698 | 0.1235294 |
| ENSG00000150756 | 0.27607362 | 0.17177914 | 0.27607362 | 0.171779141 | 0.19047619  | 0.1453488 | 0.0581395 |
| ENSG00000206530 | 0.11077844 | 0.48484848 | 0.11077844 | 0.484848485 | 0.433333333 | 0.2888889 | 0.494186  |
| ENSG00000025770 |            | 0.41212121 |            | 0.412121212 |             |           | 0.3197674 |
| ENSG00000112425 | 0.1863354  | 0.41818182 | 0.1863354  | 0.418181818 | 0.182926829 | 0.297619  | 0.3511905 |
| ENSG00000130643 |            | 0.1097561  |            | 0.109756098 |             |           | 0.1104651 |
| ENSG00000113621 |            | 0.3969697  |            | 0.396969697 |             |           | 0.3604651 |
| ENSG00000254081 | 0.3502994  |            | 0.3502994  |             | 0.397590361 |           | 0.4011628 |
| ENSG00000170390 | 0.18181818 |            | 0.18181818 |             |             |           |           |
| ENSG00000110852 | 0.28443114 | 0.4127907  | 0.28443114 | 0.412790698 | 0.380952381 | 0.2906977 | 0.4545455 |
| ENSG00000198169 |            |            |            |             |             |           | 0.4302326 |
| ENSG00000099834 | 0.42814371 | 0.36280488 | 0.42814371 | 0.362804878 |             |           | 0.2529412 |
| ENSG00000145423 |            |            |            |             |             |           | 0.2111111 |
| ENSG00000182223 |            | 0.17222222 |            | 0.172222222 |             |           | 0.0777778 |
| ENSG00000182256 |            | 0.45731707 |            | 0.457317073 |             |           | 0.255814  |
| ENSG00000222014 | 0.44848485 |            | 0.44848485 |             | 0.148809524 |           | 0.1686047 |
| ENSG00000123349 | 0.12777778 |            | 0.12777778 |             |             |           |           |

|                 |            |            |            |             |             |           |           |
|-----------------|------------|------------|------------|-------------|-------------|-----------|-----------|
| ENSG00000117758 |            |            |            |             |             |           | 0.1818182 |
| ENSG00000168014 |            | 0.17878788 |            | 0.178787879 |             |           | 0.2882353 |
| ENSG00000111361 |            | 0.34848485 |            | 0.348484848 |             |           | 0.0523256 |
| ENSG00000104980 |            | 0.32022472 |            | 0.320224719 |             |           | 0.4545455 |
| ENSG00000150086 |            | 0.44512195 |            | 0.445121951 |             |           | 0.2209302 |
| ENSG00000070808 | 0.15963855 | 0.07777778 | 0.15963855 | 0.07777778  | 0.222222222 | 0.25      |           |
| ENSG00000003989 | 0.16666667 | 0.18484848 | 0.16666667 | 0.184848485 |             |           | 0.1395349 |
| ENSG00000220891 |            |            |            |             |             |           | 0.3837209 |
| ENSG00000119041 |            | 0.0969697  |            | 0.096969697 |             |           | 0.0930233 |
| ENSG00000163251 |            | 0.40555556 |            | 0.405555556 |             |           | 0.2727273 |
| ENSG00000150275 | 0.45508982 | 0.41455696 | 0.45508982 | 0.414556962 | 0.178571429 | 0.0930233 | 0.4651163 |
| ENSG00000008128 |            |            |            |             | 0.175       | 0.1222222 |           |
| ENSG00000169826 |            | 0.278125   |            | 0.278125    |             |           | 0.4767442 |
| ENSG00000151445 |            | 0.49393939 |            | 0.493939394 |             |           | 0.0755814 |
| ENSG00000205882 |            | 0.48888889 |            | 0.488888889 |             |           | 0.4651163 |
| ENSG00000203805 |            | 0.19817073 |            | 0.198170732 |             |           | 0.0588235 |
| ENSG00000124171 |            | 0.3445122  |            | 0.344512195 |             |           | 0.3176471 |
| ENSG00000145907 |            | 0.43030303 |            | 0.43030303  | 0.232142857 | 0.2470588 | 0.2732558 |
| ENSG00000205791 |            | 0.4847561  |            | 0.484756098 |             |           | 0.3058824 |
| ENSG00000139132 | 0.25149701 | 0.45       | 0.25149701 | 0.45        | 0.255952381 | 0.1686047 | 0.1705882 |
| ENSG00000244474 |            | 0.22777778 |            | 0.227777778 |             |           | 0.1590909 |
| ENSG00000100294 |            | 0.3030303  |            | 0.303030303 |             |           | 0.377907  |
| ENSG00000170892 | 0.26875    |            | 0.26875    |             | 0.174698795 | 0.1707317 | 0.1764706 |
| ENSG00000106565 | 0.48295455 | 0.49393939 | 0.48295455 | 0.493939394 | 0.366666667 | 0.2790698 | 0.3662791 |
| ENSG00000155265 |            | 0.45757576 |            | 0.457575758 |             |           | 0.2151163 |
| ENSG00000204950 |            | 0.13803681 |            | 0.13803681  |             |           | 0.4411765 |
| ENSG00000162951 |            |            |            |             |             |           | 0.1       |
| ENSG00000171302 | 0.19760479 | 0.13888889 | 0.19760479 | 0.138888889 | 0.28313253  | 0.3081395 | 0.3081395 |
| ENSG00000180929 |            | 0.40449438 |            | 0.404494382 |             |           | 0.1931818 |
| ENSG00000161958 |            | 0.44848485 |            | 0.448484848 |             |           | 0.25      |
| ENSG00000163040 |            | 0.18888889 |            | 0.188888889 |             |           | 0.2857143 |
| ENSG00000133069 | 0.10179641 | 0.11656442 | 0.10179641 | 0.116564417 |             | 0.0755814 |           |
| ENSG00000166415 |            | 0.41515152 |            | 0.415151515 |             |           | 0.4418605 |
| ENSG00000162643 | 0.22754491 | 0.14556962 | 0.22754491 | 0.14556962  | 0.476190476 | 0.4360465 | 0.2317073 |
| ENSG00000153303 | 0.11392405 | 0.4591195  | 0.11392405 | 0.459119497 | 0.05952381  | 0.1162791 | 0.4702381 |
| ENSG00000205758 |            | 0.41011236 |            | 0.41011236  | 0.148809524 | 0.1976744 | 0.5       |
| ENSG00000130338 | 0.24545455 | 0.49693252 | 0.24545455 | 0.496932515 | 0.452380952 | 0.4709302 | 0.5       |
| ENSG00000164850 | 0.21856287 | 0.35057471 | 0.21856287 | 0.350574713 | 0.196428571 | 0.2058824 | 0.4431818 |
| ENSG00000161714 |            | 0.20606061 |            | 0.206060606 |             |           | 0.0755814 |
| ENSG00000173641 | 0.36526946 | 0.39939024 | 0.36526946 | 0.399390244 | 0.321428571 | 0.3452381 | 0.2823529 |
| ENSG00000147145 |            | 0.24242424 |            | 0.242424242 |             |           |           |
| ENSG00000100739 |            |            |            |             | 0.130952381 | 0.1337209 |           |
| ENSG00000134020 | 0.19461078 |            | 0.19461078 |             | 0.386904762 | 0.3255814 |           |
| ENSG00000213002 | 0.47865854 | 0.17222222 | 0.47865854 | 0.172222222 | 0.3         | 0.2621951 | 0.25      |
| ENSG00000248874 |            | 0.19444444 |            | 0.194444444 |             |           | 0.0777778 |
| ENSG00000142864 |            | 0.42424242 |            | 0.424242424 |             |           | 0.4518072 |
| ENSG00000215372 |            |            |            |             |             |           | 0.2625    |
| ENSG00000047936 |            | 0.38181818 |            | 0.381818182 |             |           | 0.372093  |
| ENSG00000160917 |            | 0.15       |            | 0.15        |             |           | 0.3255814 |
| ENSG00000131374 | 0.47777778 | 0.30606061 | 0.47777778 | 0.306060606 |             |           | 0.0639535 |
| ENSG00000103056 |            | 0.42613636 |            | 0.426136364 | 0.155555556 | 0.1136364 | 0.1818182 |
| ENSG00000214787 |            | 0.10429448 |            | 0.104294479 |             |           | 0.1428571 |
| ENSG00000129315 | 0.20555556 | 0.38484848 | 0.20555556 | 0.384848485 | 0.277777778 | 0.2954545 | 0.2790698 |
| ENSG00000132688 |            | 0.29393939 |            | 0.293939394 |             |           | 0.2848837 |

|                 |            |            |            |             |             |           |           |
|-----------------|------------|------------|------------|-------------|-------------|-----------|-----------|
| ENSG00000204033 | 0.19461078 | 0.40909091 | 0.19461078 | 0.409090909 | 0.083333333 |           | 0.3430233 |
| ENSG00000124508 | 0.49700599 | 0.48484848 | 0.49700599 | 0.484848485 | 0.089285714 | 0.1162791 | 0.3197674 |
| ENSG00000154814 |            | 0.43333333 |            | 0.433333333 |             |           | 0.4709302 |
| ENSG00000081818 |            | 0.26969697 |            | 0.26969697  |             |           | 0.4096386 |
| ENSG00000146282 |            | 0.1030303  |            | 0.103030303 |             |           | 0.1411765 |
| ENSG00000213886 | 0.48802395 | 0.46103896 | 0.48802395 | 0.461038961 | 0.148809524 | 0.2151163 | 0.3023256 |
| ENSG00000165383 |            | 0.18711656 |            | 0.187116564 |             |           |           |
| ENSG00000104081 |            | 0.46666667 |            | 0.466666667 |             |           | 0.5       |
| ENSG00000189433 |            |            |            |             |             |           | 0.1569767 |
| ENSG00000047621 |            | 0.17391304 |            | 0.173913043 |             |           | 0.1569767 |
| ENSG00000135636 | 0.1746988  |            | 0.1746988  |             |             |           |           |
| ENSG00000197106 |            | 0.48787879 |            | 0.487878788 |             |           | 0.4318182 |
| ENSG00000223501 | 0.07831325 | 0.33939394 | 0.07831325 | 0.339393939 |             |           | 0.3255814 |
| ENSG00000115414 |            | 0.36666667 |            | 0.366666667 |             |           | 0.25      |
| ENSG00000152133 |            | 0.36060606 |            | 0.360606061 |             |           | 0.1860465 |
| ENSG00000112297 | 0.38333333 | 0.35555556 | 0.38333333 | 0.35555556  | 0.411111111 | 0.4222222 | 0.3139535 |
| ENSG00000146063 | 0.14367816 |            | 0.14367816 |             | 0.410714286 | 0.4244186 |           |
| ENSG00000067057 | 0.48802395 | 0.31212121 | 0.48802395 | 0.312121212 | 0.470238095 | 0.4476744 | 0.372093  |
| ENSG00000204389 | 0.08888889 |            | 0.08888889 |             | 0.311111111 | 0.1976744 |           |
| ENSG00000166925 | 0.26946108 |            | 0.26946108 |             |             |           |           |
| ENSG00000075275 |            | 0.46666667 |            | 0.466666667 |             |           | 0.2267442 |
| ENSG00000175857 | 0.20658683 | 0.3969697  | 0.20658683 | 0.396969697 | 0.120481928 |           |           |
| ENSG00000171843 |            | 0.21604938 |            | 0.216049383 |             |           | 0.3372093 |
| ENSG00000186814 | 0.09580838 | 0.36666667 | 0.09580838 | 0.366666667 |             |           | 0.5       |
| ENSG00000168137 |            | 0.13636364 |            | 0.136363636 |             |           | 0.0755814 |
| ENSG00000035141 |            | 0.37272727 |            | 0.372727273 |             |           | 0.4404762 |
| ENSG00000162745 |            | 0.41515152 |            | 0.415151515 |             |           | 0.3488372 |
| ENSG00000177700 |            | 0.2969697  |            | 0.296969697 |             |           | 0.2732558 |
| ENSG00000168291 |            | 0.33636364 |            | 0.336363636 |             |           | 0.2209302 |
| ENSG00000213064 |            | 0.29141104 |            | 0.291411043 |             |           | 0.5       |
| ENSG00000169181 | 0.45508982 | 0.38484848 | 0.45508982 | 0.384848485 | 0.392857143 | 0.4709302 | 0.4534884 |
| ENSG00000134262 | 0.26646707 |            | 0.26646707 |             | 0.114457831 | 0.2638889 |           |
| ENSG00000128849 |            | 0.44817073 |            | 0.448170732 |             |           | 0.3604651 |
| ENSG00000097046 | 0.25748503 | 0.47575758 | 0.25748503 | 0.475757576 | 0.208333333 | 0.2529412 | 0.0755814 |
| ENSG00000092199 | 0.05988024 | 0.36969697 | 0.05988024 | 0.36969697  |             |           | 0.3313953 |
| ENSG00000131634 |            | 0.30909091 |            | 0.309090909 |             |           | 0.4411765 |
| ENSG00000118873 |            | 0.08333333 |            | 0.083333333 |             |           |           |
| ENSG00000003137 |            | 0.20731707 |            | 0.207317073 |             |           | 0.4709302 |
| ENSG00000253459 | 0.3125     |            | 0.3125     |             | 0.188888889 | 0.1136364 |           |
| ENSG00000071462 | 0.10674157 | 0.47575758 | 0.10674157 | 0.475757576 | 0.444444444 | 0.4659091 | 0.2906977 |
| ENSG00000217702 | 0.05       |            | 0.05       |             | 0.5         | 0.4659091 | 0.0639535 |
| ENSG00000151726 |            | 0.35757576 |            | 0.357575758 | 0.08125     | 0.0795455 | 0.4166667 |
| ENSG00000143751 |            | 0.37078652 |            | 0.370786517 |             |           | 0.25      |
| ENSG00000188064 |            | 0.30606061 |            | 0.306060606 |             |           | 0.2267442 |
| ENSG00000146910 | 0.2245509  | 0.39090909 | 0.2245509  | 0.390909091 | 0.303571429 | 0.2848837 | 0.494186  |
| ENSG00000187824 |            | 0.4054878  |            | 0.405487805 |             |           | 0.4767442 |
| ENSG00000103426 | 0.08982036 | 0.11515152 | 0.08982036 | 0.115151515 | 0.154761905 | 0.1802326 | 0.0764706 |
| ENSG00000173908 |            | 0.29090909 |            | 0.290909091 |             |           | 0.377907  |
| ENSG00000084090 |            | 0.17878788 |            | 0.178787879 |             |           | 0.1555556 |
| ENSG00000176623 |            | 0.44155844 |            | 0.441558442 |             |           | 0.4825581 |
| ENSG00000146950 |            | 0.19207317 |            | 0.192073171 |             |           | 0.4470588 |
| ENSG00000171495 | 0.21818182 |            | 0.21818182 |             | 0.329268293 | 0.3953488 |           |
| ENSG00000178021 |            | 0.45757576 |            | 0.457575758 |             |           | 0.3837209 |
| ENSG00000075292 | 0.14670659 | 0.25       | 0.14670659 | 0.25        | 0.071428571 | 0.2352941 | 0.2848837 |

|                 |            |            |            |             |             |           |           |
|-----------------|------------|------------|------------|-------------|-------------|-----------|-----------|
| ENSG00000242110 |            | 0.32121212 |            | 0.321212121 |             |           | 0.3636364 |
| ENSG0000083750  | 0.42777778 |            | 0.42777778 |             | 0.266666667 | 0.2159091 |           |
| ENSG0000066557  |            | 0.20224719 |            | 0.202247191 |             |           | 0.3139535 |
| ENSG00000206190 |            | 0.43865031 |            | 0.438650307 |             |           | 0.4302326 |
| ENSG00000169548 |            |            |            |             | 0.37804878  | 0.325     | 0.4457831 |
| ENSG00000162772 |            | 0.2030303  |            | 0.203030303 |             |           | 0.4709302 |
| ENSG00000143590 |            | 0.48787879 |            | 0.487878788 |             |           | 0.0697674 |
| ENSG00000140090 | 0.4760479  | 0.4054878  | 0.4760479  | 0.405487805 |             |           | 0.4883721 |
| ENSG00000182645 | 0.19631902 | 0.07954545 | 0.19631902 | 0.079545455 |             | 0.255814  | 0.3409091 |
| ENSG00000185483 | 0.17964072 | 0.23602484 | 0.17964072 | 0.236024845 | 0.488095238 | 0.4476744 | 0.0647059 |
| ENSG00000126218 |            | 0.13030303 |            | 0.13030303  |             |           | 0.3837209 |
| ENSG00000186468 | 0.35628743 | 0.41818182 | 0.35628743 | 0.418181818 | 0.05952381  |           |           |
| ENSG00000123689 |            |            |            |             |             |           | 0.2840909 |
| ENSG00000169857 |            |            |            |             |             |           | 0.2790698 |
| ENSG00000114956 | 0.18674699 | 0.3        | 0.18674699 | 0.3         |             |           | 0.4360465 |
| ENSG00000139780 |            | 0.3136646  |            | 0.313664596 |             |           |           |
| ENSG00000143851 | 0.32634731 | 0.32222222 | 0.32634731 | 0.322222222 | 0.19047619  | 0.372093  | 0.2117647 |
| ENSG00000110171 | 0.24550898 | 0.17878788 | 0.24550898 | 0.178787879 |             | 0.0581395 |           |
| ENSG00000145777 | 0.45454545 | 0.18787879 | 0.45454545 | 0.187878788 | 0.339285714 | 0.3081395 |           |
| ENSG00000175445 | 0.48255814 | 0.31212121 | 0.48255814 | 0.312121212 |             |           | 0.2267442 |
| ENSG00000116761 | 0.10674157 |            | 0.10674157 |             |             |           |           |
| ENSG00000181191 |            | 0.11490683 |            | 0.114906832 |             |           |           |
| ENSG00000165583 | 0.15662651 |            | 0.15662651 |             |             |           |           |
| ENSG0000083457  |            |            |            |             | 0.238095238 | 0.2674419 |           |
| ENSG0000086991  | 0.22159091 |            | 0.22159091 |             | 0.475       | 0.4518072 |           |
| ENSG00000164099 |            | 0.10365854 |            | 0.103658537 |             |           | 0.1309524 |
| ENSG00000145703 | 0.36363636 | 0.45454545 | 0.36363636 | 0.454545455 | 0.244444444 | 0.2840909 | 0.4651163 |
| ENSG00000170485 |            | 0.32926829 |            | 0.329268293 |             |           | 0.4709302 |
| ENSG00000156535 | 0.0508982  | 0.33939394 | 0.0508982  | 0.339393939 |             |           | 0.4186047 |
| ENSG00000185737 | 0.24666667 | 0.4845679  | 0.24666667 | 0.484567901 | 0.304878049 | 0.3809524 | 0.3023256 |
| ENSG00000182795 | 0.45508982 | 0.42424242 | 0.45508982 | 0.424242424 |             |           | 0.1976744 |
| ENSG00000158470 |            | 0.38202247 |            | 0.382022472 |             |           | 0.4659091 |
| ENSG00000109452 |            | 0.18888889 |            | 0.188888889 |             |           | 0.372093  |
| ENSG00000243477 | 0.19186047 |            | 0.19186047 |             | 0.386363636 | 0.4886364 |           |
| ENSG00000185442 |            | 0.37878788 |            | 0.378787879 |             |           | 0.25      |
| ENSG00000233932 |            |            |            |             |             |           | 0.3977273 |
| ENSG00000121413 | 0.45808383 | 0.17878788 | 0.45808383 | 0.178787879 | 0.077380952 | 0.1477273 |           |
| ENSG00000158813 |            | 0.35670732 |            | 0.356707317 |             |           | 0.4069767 |
| ENSG00000152954 |            | 0.48484848 |            | 0.484848485 |             |           | 0.3604651 |
| ENSG00000205086 | 0.4186747  | 0.39393939 | 0.4186747  | 0.393939394 | 0.089285714 | 0.0813953 | 0.4883721 |
| ENSG00000196167 | 0.33233533 | 0.30792683 | 0.33233533 | 0.307926829 | 0.428571429 | 0.4883721 | 0.4883721 |
| ENSG00000171861 |            |            |            |             |             | 0.0581395 |           |
| ENSG00000167617 |            | 0.06481481 |            | 0.064814815 |             |           | 0.1       |
| ENSG00000165898 |            | 0.35454545 |            | 0.354545455 |             |           | 0.372093  |
| ENSG00000108528 |            | 0.05454545 |            | 0.054545455 |             |           | 0.1511628 |
| ENSG00000018625 |            | 0.20606061 |            | 0.206060606 |             |           | 0.25      |
| ENSG00000106588 |            | 0.16292135 |            | 0.162921348 |             |           | 0.0888889 |
| ENSG00000119508 |            | 0.3969697  |            | 0.396969697 |             |           | 0.4069767 |
| ENSG00000113552 |            | 0.45454545 |            | 0.454545455 |             |           |           |
| ENSG00000135842 |            | 0.44242424 |            | 0.442424242 |             |           | 0.4244186 |
| ENSG00000099968 | 0.45808383 | 0.47256098 | 0.45808383 | 0.472560976 | 0.119047619 | 0.122093  | 0.2647059 |
| ENSG00000155816 | 0.32934132 | 0.36060606 | 0.32934132 | 0.360606061 | 0.475903614 | 0.494186  | 0.4883721 |
| ENSG00000049769 |            |            |            |             |             |           | 0.0670732 |
| ENSG00000146233 |            | 0.21341463 |            | 0.213414634 |             |           | 0.1104651 |



|                 |            |            |            |             |             |           |           |
|-----------------|------------|------------|------------|-------------|-------------|-----------|-----------|
| ENSG00000139117 |            |            |            |             | 0.220238095 |           | 0.244186  |
| ENSG0000071537  |            | 0.44444444 |            | 0.44444444  |             |           | 0.4666667 |
| ENSG00000121073 | 0.0748503  | 0.06666667 | 0.0748503  | 0.06666667  |             |           |           |
| ENSG00000180198 | 0.40419162 |            | 0.40419162 |             |             |           |           |
| ENSG00000188042 |            | 0.46363636 |            | 0.463636364 |             |           | 0.3571429 |
| ENSG00000188039 | 0.45783133 | 0.48181818 | 0.45783133 | 0.481818182 | 0.44047619  | 0.3837209 | 0.3837209 |
| ENSG00000154945 |            | 0.34848485 |            | 0.348484848 |             |           | 0.3662791 |
| ENSG00000179774 | 0.28143713 |            | 0.28143713 |             | 0.410714286 | 0.3023256 |           |
| ENSG00000147650 |            | 0.06666667 |            | 0.066666667 |             |           |           |
| ENSG00000150593 |            | 0.0621118  |            | 0.062111801 |             |           | 0.3546512 |
| ENSG00000117335 |            | 0.40432099 |            | 0.404320988 |             |           | 0.1235294 |
| ENSG00000137571 | 0.1741573  | 0.2969697  | 0.1741573  | 0.296969697 | 0.277777778 | 0.3522727 | 0.2267442 |
| ENSG00000172716 | 0.17222222 | 0.06969697 | 0.17222222 | 0.06969697  | 0.322222222 | 0.2386364 | 0.122093  |
| ENSG00000230055 |            | 0.42121212 |            | 0.421212121 |             |           | 0.3081395 |
| ENSG00000112706 |            | 0.36111111 |            | 0.361111111 |             |           | 0.4573171 |
| ENSG00000101448 | 0.24850299 | 0.14634146 | 0.24850299 | 0.146341463 | 0.469879518 | 0.4244186 | 0.1222222 |
| ENSG00000134376 | 0.48314607 | 0.45426829 | 0.48314607 | 0.454268293 | 0.25        | 0.2325581 | 0.3139535 |
| ENSG00000176401 |            | 0.25454545 |            | 0.254545455 |             |           | 0.3023256 |
| ENSG00000144115 | 0.20658683 |            | 0.20658683 |             | 0.452380952 | 0.4767442 |           |
| ENSG00000134323 |            | 0.23333333 |            | 0.233333333 |             |           | 0.3977273 |
| ENSG00000197635 |            | 0.36363636 |            | 0.363636364 |             |           | 0.2093023 |
| ENSG00000049089 |            |            |            |             |             |           | 0.0588235 |
| ENSG00000151025 |            | 0.2030303  |            | 0.203030303 |             |           | 0.2151163 |
| ENSG00000126246 |            | 0.14110429 |            | 0.141104294 |             |           |           |
| ENSG00000101203 |            | 0.325      |            | 0.325       |             |           | 0.3895349 |
| ENSG00000197217 |            | 0.42987805 |            | 0.429878049 |             |           | 0.5       |
| ENSG00000153207 |            | 0.22222222 |            | 0.222222222 |             |           | 0.1976744 |
| ENSG00000235109 | 0.25149701 | 0.334375   | 0.25149701 | 0.334375    | 0.476190476 | 0.4883721 | 0.3809524 |
| ENSG00000188981 | 0.06287425 | 0.47222222 | 0.06287425 | 0.472222222 | 0.482142857 | 0.4244186 | 0.4011628 |
| ENSG00000107341 |            | 0.4030303  |            | 0.403030303 |             |           | 0.2732558 |
| ENSG00000250486 |            | 0.33030303 |            | 0.33030303  |             |           | 0.0843373 |
| ENSG00000101282 |            | 0.13636364 |            | 0.136363636 |             |           | 0.2702703 |
| ENSG00000168385 | 0.40419162 | 0.2125     | 0.40419162 | 0.2125      | 0.428571429 | 0.3604651 | 0.3953488 |
| ENSG00000050327 |            | 0.42424242 |            | 0.424242424 |             |           | 0.1918605 |
| ENSG00000169221 |            | 0.29444444 |            | 0.294444444 |             |           |           |
| ENSG00000101138 | 0.26807229 | 0.26969697 | 0.26807229 | 0.26969697  | 0.089285714 | 0.0639535 | 0.3       |
| ENSG00000147124 | 0.22121212 | 0.30555556 | 0.22121212 | 0.30555556  | 0.130952381 | 0.2732558 | 0.3863636 |
| ENSG00000095383 | 0.08383234 |            | 0.08383234 |             |             |           |           |
| ENSG00000102445 | 0.38888889 | 0.31818182 | 0.38888889 | 0.318181818 | 0.455555556 | 0.4659091 | 0.5       |
| ENSG00000138698 |            | 0.05151515 |            | 0.051515152 |             |           |           |
| ENSG00000119401 |            | 0.33333333 |            | 0.333333333 |             |           | 0.2954545 |
| ENSG00000164867 |            | 0.13939394 |            | 0.139393939 |             |           | 0.0523256 |
| ENSG00000157353 | 0.17065868 |            | 0.17065868 |             | 0.355421687 | 0.2848837 |           |
| ENSG00000125046 | 0.37078652 | 0.38888889 | 0.37078652 | 0.388888889 | 0.202380952 | 0.1511628 | 0.4777778 |
| ENSG00000197050 | 0.06024096 | 0.49090909 | 0.06024096 | 0.490909091 |             |           | 0.1337209 |
| ENSG00000107554 | 0.46666667 | 0.48181818 | 0.46666667 | 0.481818182 | 0.446428571 | 0.3662791 | 0.2383721 |
| ENSG00000117408 | 0.19760479 |            | 0.19760479 |             | 0.380952381 | 0.4534884 |           |
| ENSG00000162194 | 0.46590909 | 0.46666667 | 0.46590909 | 0.466666667 | 0.119047619 | 0.075     | 0.2045455 |
| ENSG00000184825 | 0.2439759  |            | 0.2439759  |             |             |           |           |
| ENSG00000168016 | 0.3742515  | 0.38787879 | 0.3742515  | 0.387878788 | 0.428571429 | 0.4883721 | 0.3430233 |
| ENSG00000173535 | 0.20658683 |            | 0.20658683 |             | 0.117283951 | 0.1607143 |           |
| ENSG00000163322 |            | 0.45121951 |            | 0.451219512 |             |           | 0.375     |
| ENSG00000158987 |            | 0.20606061 |            | 0.206060606 |             |           | 0.4709302 |
| ENSG00000117410 |            | 0.08787879 |            | 0.087878788 |             |           | 0.1104651 |

|                 |            |            |            |             |             |           |           |
|-----------------|------------|------------|------------|-------------|-------------|-----------|-----------|
| ENSG00000131966 |            | 0.3988764  |            | 0.398876404 |             |           | 0.3522727 |
| ENSG00000158525 | 0.43413174 |            | 0.43413174 |             | 0.5         | 0.4772727 |           |
| ENSG0000069482  |            | 0.29393939 |            | 0.293939394 |             |           | 0.2383721 |
| ENSG00000159147 |            | 0.09393939 |            | 0.093939394 |             |           | 0.4883721 |
| ENSG0000085449  |            | 0.4695122  |            | 0.469512195 |             |           | 0.4821429 |
| ENSG00000105655 |            | 0.33636364 |            | 0.336363636 |             |           | 0.25      |
| ENSG00000188738 |            | 0.49079755 |            | 0.490797546 |             |           | 0.4642857 |
| ENSG00000135926 | 0.26347305 | 0.37878788 | 0.26347305 | 0.378787879 | 0.386904762 | 0.375     | 0.3863636 |
| ENSG00000157890 |            | 0.0969697  |            | 0.096969697 |             |           |           |
| ENSG00000196344 |            | 0.2        |            | 0.2         |             |           | 0.2857143 |
| ENSG00000204296 | 0.29573171 | 0.3969697  | 0.29573171 | 0.396969697 | 0.267857143 | 0.3372093 | 0.3647059 |
| ENSG00000163491 | 0.13772455 | 0.1554878  | 0.13772455 | 0.155487805 | 0.196428571 | 0.25      | 0.1395349 |
| ENSG00000145246 |            | 0.33231707 |            | 0.332317073 |             |           | 0.4825581 |
| ENSG00000198663 |            | 0.19393939 |            | 0.193939394 |             |           | 0.3139535 |
| ENSG00000108799 |            | 0.41463415 |            | 0.414634146 |             |           | 0.4360465 |
| ENSG00000136816 |            | 0.31818182 |            | 0.318181818 |             |           | 0.2848837 |
| ENSG00000163071 |            | 0.14242424 |            | 0.142424242 |             |           | 0.3023256 |
| ENSG00000120539 | 0.1497006  | 0.35757576 | 0.1497006  | 0.357575758 | 0.409090909 | 0.3076923 | 0.3988095 |
| ENSG00000197057 | 0.13473054 | 0.18181818 | 0.13473054 | 0.181818182 | 0.178571429 | 0.1162791 | 0.0813953 |
| ENSG00000197385 | 0.33333333 |            | 0.33333333 |             | 0.311111111 | 0.375     |           |
| ENSG00000169836 | 0.14071856 | 0.29090909 | 0.14071856 | 0.290909091 | 0.273809524 | 0.3546512 | 0.4825581 |
| ENSG00000096264 | 0.48502994 |            | 0.48502994 |             | 0.138554217 | 0.122093  |           |
| ENSG00000183530 |            | 0.22727273 |            | 0.227272727 |             |           | 0.127907  |
| ENSG00000215204 |            | 0.33939394 |            | 0.339393939 |             |           | 0.3197674 |
| ENSG00000198382 |            | 0.06363636 |            | 0.063636364 |             |           | 0.2674419 |
| ENSG00000144355 | 0.19444444 | 0.28787879 | 0.19444444 | 0.287878788 | 0.111111111 | 0.1704545 | 0.2209302 |
| ENSG00000170448 |            | 0.35       |            | 0.35        |             |           |           |
| ENSG00000135346 |            | 0.37078652 |            | 0.370786517 |             |           | 0.4772727 |
| ENSG00000234444 | 0.26190476 |            | 0.26190476 |             |             |           |           |
| ENSG00000254440 | 0.16467066 | 0.07763975 | 0.16467066 | 0.077639752 | 0.398809524 | 0.3953488 | 0.4107143 |
| ENSG00000197037 |            |            |            |             |             |           | 0.2848837 |
| ENSG0000038382  | 0.34269663 | 0.3597561  | 0.34269663 | 0.359756098 |             |           | 0.246988  |
| ENSG00000147654 | 0.10479042 | 0.35757576 | 0.10479042 | 0.357575758 | 0.345238095 | 0.3647059 | 0.4476744 |
| ENSG00000130695 | 0.3313253  | 0.13333333 | 0.3313253  | 0.133333333 | 0.160714286 | 0.1511628 |           |
| ENSG00000139329 |            | 0.13719512 |            | 0.137195122 | 0.279761905 | 0.1802326 | 0.1802326 |
| ENSG00000255332 |            | 0.22121212 |            | 0.221212121 |             |           | 0.0697674 |
| ENSG00000160867 | 0.21257485 | 0.24848485 | 0.21257485 | 0.248484848 |             |           |           |
| ENSG00000151779 |            | 0.38764045 |            | 0.387640449 |             |           | 0.2888889 |
| ENSG00000125967 |            |            |            |             |             |           | 0.1463415 |
| ENSG00000237441 | 0.16853933 |            | 0.16853933 |             | 0.079545455 | 0.0930233 |           |
| ENSG00000157741 |            |            |            |             |             |           | 0.1823529 |
| ENSG00000173627 | 0.29041916 | 0.37575758 | 0.29041916 | 0.375757576 | 0.077380952 |           | 0.0843373 |
| ENSG00000073910 | 0.49401198 | 0.43333333 | 0.49401198 | 0.433333333 | 0.178571429 | 0.0872093 | 0.0872093 |
| ENSG00000168096 |            | 0.47222222 |            | 0.472222222 |             |           | 0.3295455 |
| ENSG00000074621 |            |            |            |             | 0.166666667 | 0.3068182 |           |
| ENSG00000198400 | 0.35628743 | 0.21646341 | 0.35628743 | 0.216463415 | 0.130952381 | 0.1744186 | 0.3895349 |
| ENSG00000133067 |            | 0.42405063 |            | 0.424050633 |             |           | 0.3214286 |
| ENSG00000186517 |            | 0.3        |            | 0.3         |             |           | 0.2954545 |
| ENSG00000161981 | 0.25149701 | 0.16969697 | 0.25149701 | 0.16969697  | 0.397590361 | 0.4529412 | 0.4593023 |
| ENSG00000101938 |            | 0.44767442 |            | 0.447674419 |             |           |           |
| ENSG00000182389 |            | 0.19444444 |            | 0.194444444 |             |           | 0.3863636 |
| ENSG00000030066 |            | 0.45454545 |            | 0.454545455 | 0.148809524 | 0.0833333 | 0.3837209 |
| ENSG00000089057 |            | 0.46363636 |            | 0.463636364 |             |           | 0.4244186 |
| ENSG00000152611 | 0.06741573 | 0.32317073 | 0.06741573 | 0.323170732 |             |           | 0.0529412 |

|                 |            |            |            |             |             |           |           |
|-----------------|------------|------------|------------|-------------|-------------|-----------|-----------|
| ENSG00000164893 |            | 0.08181818 |            | 0.081818182 |             |           | 0.1569767 |
| ENSG00000188171 | 0.3        | 0.35151515 | 0.3        | 0.351515152 | 0.068181818 |           | 0.2272727 |
| ENSG00000125845 |            | 0.18484848 |            | 0.184848485 |             |           | 0.3895349 |
| ENSG00000113742 | 0.45508982 | 0.4        | 0.45508982 | 0.4         | 0.357142857 | 0.3372093 | 0.4578313 |
| ENSG00000204653 |            |            |            |             | 0.19047619  | 0.372093  |           |
| ENSG00000155229 | 0.2        | 0.46666667 | 0.2        | 0.46666667  |             |           | 0.4127907 |
| ENSG00000152128 |            | 0.33939394 |            | 0.339393939 |             |           | 0.3588235 |
| ENSG00000124875 |            | 0.36060606 |            | 0.360606061 |             |           | 0.2906977 |
| ENSG00000166926 |            | 0.24242424 |            | 0.242424242 |             |           | 0.3294118 |
| ENSG00000157426 | 0.27844311 | 0.44848485 | 0.27844311 | 0.448484848 | 0.172619048 | 0.2325581 | 0.4709302 |
| ENSG00000171759 | 0.34730539 | 0.20909091 | 0.34730539 | 0.209090909 |             |           |           |
| ENSG00000185332 |            | 0.26506024 |            | 0.265060241 |             |           | 0.2261905 |
| ENSG00000140527 |            | 0.41411043 |            | 0.414110429 |             |           | 0.2352941 |
| ENSG00000072041 |            | 0.24848485 |            | 0.248484848 |             |           |           |
| ENSG00000160325 |            | 0.125      |            | 0.125       | 0.233333333 | 0.25      | 0.1022727 |
| ENSG00000205930 | 0.45808383 |            | 0.45808383 |             | 0.101190476 | 0.0697674 |           |
| ENSG00000168502 | 0.23053892 | 0.42777778 | 0.23053892 | 0.427777778 | 0.053571429 |           | 0.4825581 |
| ENSG00000133454 |            | 0.38181818 |            | 0.381818182 |             |           | 0.25      |
| ENSG00000153982 |            | 0.32727273 |            | 0.327272727 |             |           | 0.4302326 |
| ENSG00000160323 | 0.08383234 | 0.46060606 | 0.08383234 | 0.460606061 |             |           | 0.2267442 |
| ENSG00000198453 | 0.36666667 | 0.41212121 | 0.36666667 | 0.412121212 | 0.34939759  | 0.2965116 | 0.3546512 |
| ENSG00000182500 |            | 0.25454545 |            | 0.254545455 |             |           | 0.3895349 |
| ENSG00000182175 | 0.4760479  | 0.28484848 | 0.4760479  | 0.284848485 |             |           | 0.2906977 |
| ENSG00000133028 |            | 0.40555556 |            | 0.405555556 |             |           | 0.4545455 |
| ENSG00000103227 | 0.44311377 | 0.15454545 | 0.44311377 | 0.154545455 | 0.375       | 0.3430233 | 0.3139535 |
| ENSG00000033100 |            | 0.40963855 |            | 0.409638554 |             |           | 0.4431818 |
| ENSG00000133704 | 0.0625     | 0.49090909 | 0.0625     | 0.490909091 | 0.279761905 | 0.3197674 | 0.4772727 |
| ENSG00000145743 |            | 0.26969697 |            | 0.26969697  |             |           | 0.2555556 |
| ENSG00000168569 |            | 0.41717791 |            | 0.417177914 |             |           | 0.4529412 |
| ENSG00000198920 | 0.26047904 | 0.46625767 | 0.26047904 | 0.466257669 | 0.345238095 | 0.3705882 | 0.3895349 |
| ENSG00000126790 | 0.22754491 |            | 0.22754491 |             | 0.136904762 | 0.1511628 |           |
| ENSG00000110429 | 0.46629213 | 0.37575758 | 0.46629213 | 0.375757576 | 0.444444444 | 0.3636364 | 0.3662791 |
| ENSG00000089902 |            | 0.22121212 |            | 0.221212121 |             |           | 0.4534884 |
| ENSG00000177337 |            | 0.33636364 |            | 0.336363636 |             |           | 0.2848837 |
| ENSG00000165633 |            | 0.41818182 |            | 0.418181818 |             |           | 0.2906977 |
| ENSG00000092148 |            |            |            |             |             |           | 0.0697674 |
| ENSG00000177981 | 0.1030303  | 0.27878788 | 0.1030303  | 0.278787879 |             |           | 0.1976744 |
| ENSG00000061918 |            | 0.21666667 |            | 0.216666667 |             |           | 0.0795455 |
| ENSG00000166828 |            | 0.45454545 |            | 0.454545455 |             |           | 0.1590909 |
| ENSG00000171467 |            | 0.28787879 |            | 0.287878788 |             |           | 0.3411765 |
| ENSG00000109205 |            | 0.24695122 |            | 0.24695122  |             |           | 0.3764706 |
| ENSG00000143367 | 0.19161677 | 0.28181818 | 0.19161677 | 0.281818182 |             |           | 0.4823529 |
| ENSG00000163624 |            | 0.47575758 |            | 0.475757576 |             |           | 0.4756098 |
| ENSG00000218672 |            | 0.25842697 |            | 0.258426966 |             |           | 0.3181818 |
| ENSG00000164304 |            | 0.15757576 |            | 0.157575758 | 0.422222222 | 0.4772727 | 0.0813953 |
| ENSG00000189403 | 0.05       | 0.35151515 | 0.05       | 0.351515152 | 0.111111111 | 0.1888889 | 0.1918605 |
| ENSG00000171241 | 0.07228916 | 0.05487805 | 0.07228916 | 0.054878049 |             |           |           |
| ENSG00000155749 | 0.28742515 | 0.43292683 | 0.28742515 | 0.432926829 | 0.482142857 | 0.4156627 | 0.3869048 |
| ENSG00000164089 | 0.36666667 | 0.08484848 | 0.36666667 | 0.084848485 |             |           | 0.4709302 |
| ENSG00000172137 |            | 0.24137931 |            | 0.24137931  |             |           | 0.4659091 |
| ENSG00000170075 | 0.34848485 |            | 0.34848485 |             | 0.457831325 | 0.4545455 |           |
| ENSG00000119636 | 0.43888889 | 0.18484848 | 0.43888889 | 0.184848485 | 0.088888889 | 0.0681818 | 0.2732558 |
| ENSG00000143614 |            | 0.42121212 |            | 0.421212121 |             |           | 0.1918605 |
| ENSG00000010282 |            | 0.42331288 |            | 0.423312883 |             |           | 0.3313953 |

|                 |            |            |            |             |             |  |                     |
|-----------------|------------|------------|------------|-------------|-------------|--|---------------------|
| ENSG00000138381 | 0.31736527 |            | 0.31736527 |             | 0.277777778 |  | 0.255814            |
| ENSG00000248835 | 0.49401198 | 0.08787879 | 0.49401198 | 0.087878788 | 0.295180723 |  | 0.3023256 0.3430233 |
| ENSG00000214160 |            | 0.24848485 |            | 0.248484848 |             |  | 0.1627907           |
| ENSG00000182601 |            | 0.44242424 |            | 0.442424242 |             |  | 0.4186047           |
| ENSG00000185404 | 0.11077844 | 0.35889571 | 0.11077844 | 0.358895706 | 0.107142857 |  | 0.1130952 0.1744186 |
| ENSG00000173163 |            |            |            |             |             |  | 0.1046512           |
| ENSG00000205325 |            | 0.40606061 |            | 0.406060606 |             |  | 0.3928571           |
| ENSG00000185291 | 0.30239521 |            | 0.30239521 |             | 0.43452381  |  | 0.4302326           |
| ENSG00000130956 |            | 0.17575758 |            | 0.175757576 |             |  |                     |
| ENSG00000163075 | 0.42222222 | 0.36969697 | 0.42222222 | 0.36969697  | 0.3         |  | 0.2613636 0.4069767 |
| ENSG00000111859 | 0.06586826 | 0.43333333 | 0.06586826 | 0.433333333 | 0.089285714 |  | 0.1046512 0.4588235 |
| ENSG00000116703 | 0.48802395 | 0.13636364 | 0.48802395 | 0.136363636 | 0.053571429 |  |                     |
| ENSG00000235568 |            | 0.4969697  |            | 0.496969697 |             |  | 0.5                 |
| ENSG00000157483 |            | 0.46363636 |            | 0.463636364 |             |  | 0.4360465           |
| ENSG00000166448 |            | 0.23333333 |            | 0.233333333 |             |  | 0.2325581           |
| ENSG00000099381 |            | 0.35465116 |            | 0.354651163 |             |  | 0.1136364           |
| ENSG00000183562 | 0.44318182 |            | 0.44318182 |             | 0.144444444 |  | 0.1818182           |
| ENSG00000026297 |            | 0.19393939 |            | 0.193939394 |             |  |                     |
| ENSG00000234602 |            | 0.13888889 |            | 0.138888889 |             |  | 0.2159091           |
| ENSG00000116396 |            |            |            |             |             |  | 0.122093            |
| ENSG00000106236 |            | 0.09393939 |            | 0.093939394 |             |  | 0.2093023           |
| ENSG00000140939 | 0.41017964 | 0.08484848 | 0.41017964 | 0.084848485 |             |  |                     |
| ENSG00000074964 |            | 0.13924051 |            | 0.139240506 |             |  | 0.0853659           |
| ENSG00000171566 |            | 0.33333333 |            | 0.333333333 |             |  | 0.2034884           |
| ENSG00000107021 |            | 0.20731707 |            | 0.207317073 |             |  | 0.3522727           |
| ENSG00000118363 | 0.14371257 | 0.43939394 | 0.14371257 | 0.439393939 | 0.208333333 |  | 0.1918605 0.1918605 |
| ENSG00000130347 |            | 0.14329268 |            | 0.143292683 |             |  | 0.1607143           |
| ENSG00000181929 | 0.44444444 |            | 0.44444444 |             | 0.3         |  | 0.4777778           |
| ENSG00000111640 | 0.37878788 |            | 0.37878788 |             | 0.476190476 |  | 0.4360465           |
| ENSG00000065802 |            | 0.4202454  |            | 0.420245399 |             |  | 0.3488372           |
| ENSG00000158604 |            | 0.37349398 |            | 0.373493976 |             |  | 0.4244186           |
| ENSG00000166450 |            | 0.4969697  |            | 0.496969697 |             |  | 0.4659091           |
| ENSG00000180822 | 0.08426966 | 0.28651685 | 0.08426966 | 0.286516854 |             |  | 0.5                 |
| ENSG00000174099 | 0.23888889 | 0.45402299 | 0.23888889 | 0.454022989 |             |  | 0.4659091           |
| ENSG00000007866 |            | 0.09393939 |            | 0.093939394 |             |  | 0.3895349           |
| ENSG00000165309 |            | 0.31111111 |            | 0.311111111 |             |  | 0.4090909           |
| ENSG00000162852 | 0.21257485 | 0.36206897 | 0.21257485 | 0.362068966 | 0.380952381 |  | 0.3313953 0.2590361 |
| ENSG00000236699 |            | 0.1969697  |            | 0.196969697 |             |  | 0.0755814           |
| ENSG00000169926 |            | 0.42424242 |            | 0.424242424 |             |  | 0.4069767           |
| ENSG00000106799 |            | 0.22560976 |            | 0.225609756 | 0.455555556 |  | 0.4204545 0.494186  |
| ENSG00000116791 |            | 0.47272727 |            | 0.472727273 |             |  | 0.25                |
| ENSG00000185022 | 0.31666667 |            | 0.31666667 |             |             |  |                     |
| ENSG00000140945 |            | 0.07777778 |            | 0.077777778 |             |  | 0.0535714           |
| ENSG00000176018 |            | 0.14545455 |            | 0.145454545 |             |  | 0.3895349           |
| ENSG00000083520 |            | 0.36969697 |            | 0.36969697  |             |  | 0.3333333           |
| ENSG00000169908 |            | 0.17222222 |            | 0.172222222 |             |  | 0.5                 |
| ENSG00000154319 | 0.48203593 | 0.48170732 | 0.48203593 | 0.481707317 | 0.380952381 |  | 0.3255814           |
| ENSG00000102271 |            | 0.32022472 |            | 0.320224719 |             |  | 0.4464286           |
| ENSG00000168589 | 0.12424242 | 0.27134146 | 0.12424242 | 0.271341463 |             |  |                     |
| ENSG00000123643 | 0.46111111 | 0.27878788 | 0.46111111 | 0.278787879 | 0.446428571 |  | 0.4 0.3837209       |
| ENSG00000126775 |            | 0.47777778 |            | 0.477777778 |             |  | 0.3636364           |
| ENSG00000184985 |            | 0.4        |            | 0.4         |             |  | 0.4883721           |
| ENSG00000127314 | 0.23795181 |            | 0.23795181 |             |             |  |                     |
| ENSG00000158092 |            | 0.10670732 |            | 0.106707317 |             |  |                     |

|                 |            |            |            |             |             |           |           |
|-----------------|------------|------------|------------|-------------|-------------|-----------|-----------|
| ENSG00000136696 | 0.48802395 | 0.49090909 | 0.48802395 | 0.490909091 | 0.339285714 | 0.2848837 | 0.2647059 |
| ENSG00000165406 |            | 0.06363636 |            | 0.063636364 |             |           | 0.1046512 |
| ENSG00000242259 |            | 0.28658537 |            | 0.286585366 |             |           | 0.4011628 |
| ENSG00000197826 |            | 0.10344828 |            | 0.103448276 |             |           | 0.0581395 |
| ENSG00000104969 |            | 0.28378378 |            | 0.283783784 |             |           | 0.4294118 |
| ENSG00000164675 | 0.07777778 |            | 0.07777778 |             |             |           |           |
| ENSG00000126106 |            | 0.34848485 |            | 0.348484848 |             |           | 0.1395349 |
| ENSG00000137497 | 0.37640449 | 0.06666667 | 0.37640449 | 0.066666667 | 0.322222222 | 0.2272727 | 0.1931818 |
| ENSG00000171448 |            | 0.16463415 |            | 0.164634146 |             |           | 0.1802326 |
| ENSG00000149308 |            |            |            |             |             |           | 0.0872093 |
| ENSG00000204356 |            | 0.06363636 |            | 0.063636364 |             |           | 0.0755814 |
| ENSG00000204344 |            | 0.29268293 |            | 0.292682927 |             |           | 0.3023256 |
| ENSG00000133742 | 0.30239521 | 0.48181818 | 0.30239521 | 0.481818182 | 0.488095238 | 0.4244186 | 0.4352941 |
| ENSG00000204702 | 0.48888889 |            | 0.48888889 |             | 0.177777778 | 0.125     |           |
| ENSG00000187013 |            | 0.25766871 |            | 0.257668712 |             |           | 0.3604651 |
| ENSG00000176024 |            |            |            |             | 0.255952381 | 0.3023256 |           |
| ENSG00000158769 |            | 0.33146067 |            | 0.331460674 |             |           | 0.2555556 |
| ENSG00000070047 |            | 0.25       |            | 0.25        |             |           |           |
| ENSG00000103707 |            | 0.5        |            | 0.5         |             |           | 0.0755814 |
| ENSG00000169692 |            | 0.16060606 |            | 0.160606061 |             |           | 0.0988372 |
| ENSG00000160179 |            | 0.4847561  |            | 0.484756098 |             |           | 0.4117647 |
| ENSG00000088854 | 0.43712575 | 0.46060606 | 0.43712575 | 0.460606061 | 0.18452381  | 0.244186  | 0.4767442 |
| ENSG00000107281 |            | 0.31707317 |            | 0.317073171 |             |           | 0.2       |
| ENSG00000183742 |            | 0.26363636 |            | 0.263636364 |             |           | 0.2965116 |
| ENSG00000251695 |            | 0.29393939 |            | 0.293939394 |             |           | 0.3953488 |
| ENSG00000111843 | 0.41916168 |            | 0.41916168 |             | 0.095238095 | 0.0654762 |           |
| ENSG00000204262 |            | 0.13030303 |            | 0.13030303  |             |           | 0.1744186 |
| ENSG00000103502 | 0.49700599 | 0.45151515 | 0.49700599 | 0.451515152 | 0.107142857 | 0.0930233 | 0.0930233 |
| ENSG00000179104 |            | 0.47272727 |            | 0.472727273 |             |           | 0.3       |
| ENSG00000122359 | 0.36526946 | 0.48170732 | 0.36526946 | 0.481707317 | 0.357142857 | 0.3313953 | 0.3604651 |
| ENSG00000123191 | 0.19444444 | 0.48787879 | 0.19444444 | 0.487878788 | 0.422222222 | 0.375     | 0.2906977 |
| ENSG00000102974 |            | 0.08181818 |            | 0.081818182 |             |           |           |
| ENSG00000111906 |            | 0.43902439 |            | 0.43902439  |             |           | 0.3235294 |
| ENSG00000182040 |            | 0.24375    |            | 0.24375     |             |           | 0.3795181 |
| ENSG00000128928 |            | 0.48795181 |            | 0.487951807 |             |           | 0.3139535 |
| ENSG00000088038 | 0.49700599 | 0.42682927 | 0.49700599 | 0.426829268 | 0.267857143 | 0.2151163 | 0.494186  |
| ENSG00000180035 |            | 0.36781609 |            | 0.367816092 |             |           | 0.0909091 |
| ENSG00000170266 |            | 0.30909091 |            | 0.309090909 | 0.464285714 | 0.4476744 | 0.1686047 |
| ENSG00000198203 |            | 0.44242424 |            | 0.442424242 |             |           |           |
| ENSG00000130287 |            | 0.16060606 |            | 0.160606061 |             |           | 0.122093  |
| ENSG00000127125 |            | 0.38181818 |            | 0.381818182 |             |           | 0.4698795 |
| ENSG00000105708 |            | 0.44817073 |            | 0.448170732 |             |           | 0.4476744 |
| ENSG00000036565 | 0.11746988 | 0.35454545 | 0.11746988 | 0.354545455 | 0.232142857 | 0.1976744 | 0.3823529 |
| ENSG00000176490 |            | 0.49438202 |            | 0.494382022 |             |           | 0.3181818 |
| ENSG00000072134 |            | 0.22727273 |            | 0.227272727 |             |           | 0.127907  |
| ENSG00000143624 | 0.06111111 | 0.0862069  | 0.06111111 | 0.086206897 |             |           |           |
| ENSG00000176383 |            | 0.43597561 |            | 0.43597561  |             |           | 0.2616279 |
| ENSG00000099812 |            |            |            |             |             |           | 0.2383721 |
| ENSG00000176225 |            | 0.22424242 |            | 0.224242424 |             |           | 0.1744186 |
| ENSG00000115946 |            | 0.3836478  |            | 0.383647799 |             |           | 0.4583333 |
| ENSG00000067082 |            | 0.41818182 |            | 0.418181818 |             |           | 0.5       |
| ENSG00000214262 |            | 0.29090909 |            | 0.290909091 |             |           | 0.4883721 |
| ENSG00000120868 |            |            |            |             | 0.214285714 | 0.1411765 |           |
| ENSG00000157445 | 0.36526946 | 0.44545455 | 0.36526946 | 0.445454545 | 0.43452381  | 0.3488372 | 0.4534884 |

|                |            |            |            |             |             |           |           |
|----------------|------------|------------|------------|-------------|-------------|-----------|-----------|
| ENSG0000008513 | 0.32934132 | 0.45151515 | 0.32934132 | 0.451515152 | 0.458333333 | 0.3953488 | 0.3888889 |
| ENSG0000168374 | 0.14071856 |            | 0.14071856 |             | 0.428571429 | 0.4825581 |           |
| ENSG0000107317 |            | 0.27272727 |            | 0.272727273 |             |           | 0.2117647 |
| ENSG0000185730 |            | 0.4845679  |            | 0.484567901 | 0.244444444 | 0.2386364 | 0.2616279 |
| ENSG0000172717 |            | 0.08045977 |            | 0.08045977  |             |           | 0.5       |
| ENSG0000185267 |            | 0.09393939 |            | 0.093939394 |             |           | 0.4534884 |
| ENSG0000258474 |            | 0.43636364 |            | 0.436363636 |             |           | 0.4709302 |
| ENSG0000256525 | 0.19760479 |            | 0.19760479 |             |             |           |           |
| ENSG0000101470 |            | 0.37272727 |            | 0.372727273 |             |           | 0.2906977 |
| ENSG0000138160 |            | 0.48787879 |            | 0.487878788 |             |           | 0.3430233 |
| ENSG0000181458 | 0.17964072 |            | 0.17964072 |             | 0.325301205 | 0.377907  |           |
| ENSG0000163472 |            |            |            |             |             |           | 0.3068182 |
| ENSG0000106327 |            | 0.18888889 |            | 0.188888889 |             |           | 0.1024096 |
| ENSG0000167768 |            | 0.12121212 |            | 0.121212121 |             |           |           |
| ENSG0000138075 | 0.36046512 | 0.32424242 | 0.36046512 | 0.324242424 |             |           | 0.1337209 |
| ENSG0000151892 | 0.49700599 | 0.30909091 | 0.49700599 | 0.309090909 | 0.357142857 | 0.3647059 | 0.4772727 |
| ENSG0000180336 | 0.11676647 | 0.09770115 | 0.11676647 | 0.097701149 | 0.148809524 |           |           |
| ENSG0000072657 |            | 0.17272727 |            | 0.172727273 |             |           | 0.3895349 |
| ENSG0000147459 |            | 0.49390244 |            | 0.493902439 |             |           | 0.4651163 |
| ENSG0000115687 | 0.22754491 | 0.41212121 | 0.22754491 | 0.412121212 | 0.321428571 | 0.3372093 | 0.494186  |
| ENSG0000106034 | 0.26111111 | 0.30606061 | 0.26111111 | 0.306060606 | 0.077777778 | 0.0795455 | 0.3197674 |
| ENSG0000135097 |            | 0.47575758 |            | 0.475757576 |             |           | 0.4476744 |
| ENSG0000180535 |            |            |            |             | 0.311111111 | 0.3488372 |           |
| ENSG0000110675 |            |            |            |             |             |           | 0.3546512 |
| ENSG0000157654 |            | 0.49691358 |            | 0.49691358  |             |           | 0.4883721 |
| ENSG0000188803 |            | 0.40606061 |            | 0.406060606 |             |           | 0.1453488 |
| ENSG0000104814 |            |            |            |             | 0.273809524 | 0.25      |           |
| ENSG0000114268 |            | 0.32012195 |            | 0.320121951 |             |           | 0.2209302 |
| ENSG0000128585 | 0.38323353 | 0.47752809 | 0.38323353 | 0.47752809  | 0.307692308 | 0.3676471 | 0.4651163 |
| ENSG0000120942 |            |            |            |             |             |           | 0.1818182 |
| ENSG0000010361 |            | 0.11666667 |            | 0.116666667 |             |           | 0.1590909 |
| ENSG0000106819 |            | 0.4969697  |            | 0.496969697 |             |           | 0.3313953 |
| ENSG0000012232 |            | 0.31818182 |            | 0.318181818 |             |           | 0.3372093 |
| ENSG0000135517 |            | 0.43939394 |            | 0.439393939 |             |           | 0.3546512 |
| ENSG0000156475 | 0.24550898 |            | 0.24550898 |             | 0.470238095 | 0.4651163 |           |
| ENSG0000135736 |            | 0.24390244 |            | 0.243902439 |             |           |           |
| ENSG0000100003 | 0.49698795 | 0.44545455 | 0.49698795 | 0.445454545 | 0.357142857 | 0.4186047 | 0.4036145 |
| ENSG0000181847 | 0.30838323 | 0.47272727 | 0.30838323 | 0.472727273 | 0.119047619 | 0.1453488 | 0.1184211 |
| ENSG0000157150 |            | 0.07878788 |            | 0.078787879 |             |           | 0.1395349 |
| ENSG0000081237 |            | 0.18181818 |            | 0.181818182 | 0.130952381 | 0.0930233 | 0.3493976 |
| ENSG0000204613 |            | 0.35454545 |            | 0.354545455 |             |           | 0.4069767 |
| ENSG0000168916 | 0.25149701 |            | 0.25149701 |             | 0.220238095 | 0.1352941 |           |
| ENSG0000184507 | 0.15568862 |            | 0.15568862 |             | 0.333333333 | 0.3604651 |           |
| ENSG0000167562 |            | 0.1954023  |            | 0.195402299 |             |           | 0.4886364 |
| ENSG0000185787 | 0.1497006  | 0.12424242 | 0.1497006  | 0.124242424 |             | 0.0523256 | 0.2267442 |
| ENSG0000203546 |            | 0.3969697  |            | 0.396969697 |             |           | 0.3895349 |
| ENSG0000160710 |            | 0.46319018 |            | 0.463190184 |             |           | 0.4709302 |
| ENSG0000064309 | 0.21348315 | 0.49390244 | 0.21348315 | 0.493902439 | 0.329545455 | 0.3604651 | 0.4882353 |
| ENSG0000138823 | 0.20731707 | 0.42727273 | 0.20731707 | 0.427272727 | 0.122222222 | 0.2111111 | 0.2159091 |
| ENSG0000128276 |            |            |            |             |             |           | 0.4277108 |
| ENSG0000176102 | 0.16467066 | 0.39393939 | 0.16467066 | 0.393939394 | 0.303571429 | 0.3953488 | 0.2559524 |
| ENSG0000166961 |            | 0.46111111 |            | 0.461111111 |             |           | 0.1802326 |
| ENSG0000185669 |            | 0.32121212 |            | 0.321212121 |             |           | 0.3953488 |
| ENSG0000106701 | 0.06886228 | 0.41212121 | 0.06886228 | 0.412121212 | 0.464285714 | 0.4302326 | 0.4186047 |

|                 |            |            |            |             |             |           |           |
|-----------------|------------|------------|------------|-------------|-------------|-----------|-----------|
| ENSG00000140319 | 0.05988024 | 0.36666667 | 0.05988024 | 0.36666667  | 0.219512195 | 0.2352941 | 0.3470588 |
| ENSG00000180846 |            | 0.45121951 |            | 0.451219512 |             |           | 0.4058824 |
| ENSG00000103150 |            | 0.06969697 |            | 0.06969697  |             |           | 0.1744186 |
| ENSG00000137673 |            | 0.19207317 |            | 0.192073171 |             |           | 0.1976744 |
| ENSG00000071243 |            | 0.19090909 |            | 0.190909091 |             |           | 0.3875    |
| ENSG00000165953 | 0.46407186 |            | 0.46407186 |             | 0.404761905 | 0.4883721 |           |
| ENSG00000172262 |            | 0.39877301 |            | 0.398773006 |             |           | 0.2117647 |
| ENSG00000229377 |            | 0.07471264 |            | 0.074712644 |             |           |           |
| ENSG00000107186 | 0.13333333 | 0.39393939 | 0.13333333 | 0.393939394 | 0.155555556 | 0.1744186 | 0.4127907 |
| ENSG00000164691 | 0.29341317 | 0.10670732 | 0.29341317 | 0.106707317 | 0.331325301 | 0.3139535 | 0.5       |
| ENSG00000174579 |            |            |            |             | 0.154761905 | 0.1744186 |           |
| ENSG00000064607 |            | 0.25151515 |            | 0.251515152 |             |           | 0.1860465 |
| ENSG00000116350 |            | 0.22727273 |            | 0.227272727 |             |           | 0.122093  |
| ENSG00000198431 | 0.33333333 | 0.1        | 0.33333333 | 0.1         | 0.422222222 | 0.4333333 | 0.2777778 |
| ENSG00000170803 |            | 0.4969697  |            | 0.496969697 |             |           | 0.2906977 |
| ENSG00000183579 |            | 0.48787879 |            | 0.487878788 |             |           | 0.4883721 |
| ENSG00000113520 | 0.48203593 |            | 0.48203593 |             | 0.261904762 | 0.2790698 |           |
| ENSG00000150750 |            | 0.21818182 |            | 0.218181818 |             |           | 0.3081395 |
| ENSG00000130508 |            | 0.434375   |            | 0.434375    |             |           | 0.3571429 |
| ENSG00000103196 | 0.21666667 | 0.42121212 | 0.21666667 | 0.421212121 | 0.411111111 | 0.4886364 | 0.3588235 |
| ENSG00000121274 |            | 0.23030303 |            | 0.23030303  |             |           | 0.3604651 |
| ENSG00000152213 |            | 0.46932515 |            | 0.469325153 |             |           | 0.2159091 |
| ENSG00000072682 | 0.2754491  |            | 0.2754491  |             | 0.208333333 | 0.3488372 | 0.122093  |
| ENSG00000213977 |            | 0.0862069  |            | 0.086206897 |             |           | 0.3181818 |
| ENSG00000213930 |            | 0.10606061 |            | 0.106060606 |             |           |           |
| ENSG00000114450 | 0.17365269 | 0.25       | 0.17365269 | 0.25        |             |           | 0.4418605 |
| ENSG00000007314 |            | 0.35757576 |            | 0.357575758 |             |           | 0.4647059 |
| ENSG00000090971 |            | 0.48888889 |            | 0.488888889 |             |           | 0.25      |
| ENSG00000114554 |            | 0.1097561  |            | 0.109756098 |             |           | 0.4090909 |
| ENSG00000142515 |            | 0.38787879 |            | 0.387878788 |             |           | 0.4941176 |
| ENSG00000137040 |            | 0.2        |            | 0.2         |             |           | 0.1860465 |
| ENSG00000004660 |            | 0.49695122 |            | 0.49695122  |             |           | 0.4825581 |
| ENSG00000137364 |            | 0.2        |            | 0.2         |             |           | 0.2727273 |
| ENSG00000153317 | 0.08333333 | 0.49393939 | 0.08333333 | 0.493939394 | 0.111111111 | 0.1777778 | 0.4011628 |
| ENSG00000178996 |            | 0.43597561 |            | 0.43597561  |             |           | 0.4709302 |
| ENSG00000140488 | 0.21818182 |            | 0.21818182 |             | 0.446428571 | 0.3235294 | 0.377907  |
| ENSG00000196104 |            | 0.39090909 |            | 0.390909091 |             |           | 0.377907  |
| ENSG00000163749 |            | 0.48787879 |            | 0.487878788 |             |           | 0.0813953 |
| ENSG00000164442 |            | 0.14242424 |            | 0.142424242 |             |           |           |
| ENSG00000198178 | 0.0508982  |            | 0.0508982  |             | 0.208333333 | 0.255814  |           |
| ENSG00000120889 | 0.24157303 | 0.45555556 | 0.24157303 | 0.455555556 |             |           | 0.4431818 |
| ENSG00000236104 |            | 0.48787879 |            | 0.487878788 |             |           | 0.3372093 |
| ENSG00000103404 | 0.13473054 | 0.34545455 | 0.13473054 | 0.345454545 | 0.148809524 | 0.1395349 | 0.2151163 |
| ENSG00000164822 |            | 0.18484848 |            | 0.184848485 |             |           | 0.0697674 |
| ENSG00000140443 | 0.26234568 | 0.48333333 | 0.26234568 | 0.483333333 | 0.077380952 | 0.0714286 | 0.4888889 |
| ENSG00000135972 | 0.45508982 | 0.23333333 | 0.45508982 | 0.233333333 | 0.369047619 | 0.2732558 | 0.125     |
| ENSG00000204131 |            | 0.28220859 |            | 0.282208589 |             |           |           |
| ENSG00000124209 |            | 0.49393939 |            | 0.493939394 |             |           | 0.4186047 |
| ENSG00000204977 |            | 0.22222222 |            | 0.222222222 |             |           | 0.4204545 |
| ENSG00000169992 |            | 0.36666667 |            | 0.366666667 |             |           | 0.2267442 |
| ENSG00000132874 |            | 0.43939394 |            | 0.439393939 |             |           | 0.3662791 |
| ENSG00000137845 | 0.26646707 |            | 0.26646707 |             | 0.130952381 | 0.1162791 |           |
| ENSG00000168591 |            | 0.33939394 |            | 0.339393939 |             |           | 0.3176471 |
| ENSG00000108433 | 0.3125     | 0.48181818 | 0.3125     | 0.481818182 | 0.422222222 | 0.4545455 | 0.4593023 |

|                 |            |            |            |             |             |           |           |
|-----------------|------------|------------|------------|-------------|-------------|-----------|-----------|
| ENSG00000100106 |            | 0.5        |            | 0.5         |             |           | 0.4767442 |
| ENSG00000101166 |            | 0.46036585 |            | 0.460365854 |             |           | 0.1569767 |
| ENSG00000085871 | 0.2754491  |            | 0.2754491  |             | 0.154761905 | 0.244186  |           |
| ENSG00000197701 |            | 0.18888889 |            | 0.188888889 |             |           | 0.2       |
| ENSG00000211456 | 0.39820359 | 0.36666667 | 0.39820359 | 0.366666667 | 0.397590361 | 0.4047619 | 0.3139535 |
| ENSG00000114446 |            | 0.12727273 |            | 0.127272727 |             |           | 0.1647059 |
| ENSG00000215019 |            |            |            |             |             |           | 0.2616279 |
| ENSG00000134779 |            | 0.18787879 |            | 0.187878788 |             |           |           |
| ENSG00000122435 |            | 0.07272727 |            | 0.072727273 |             |           | 0.0755814 |
| ENSG00000086189 |            | 0.29503106 |            | 0.295031056 |             |           | 0.297619  |
| ENSG00000145632 |            | 0.33333333 |            | 0.333333333 |             |           | 0.25      |
| ENSG00000146221 | 0.39520958 | 0.18787879 | 0.39520958 | 0.187878788 | 0.44047619  | 0.3023256 | 0.3023256 |
| ENSG00000183309 | 0.17777778 | 0.21341463 | 0.17777778 | 0.213414634 | 0.188888889 | 0.2045455 | 0.3546512 |
| ENSG00000150433 | 0.29041916 | 0.45454545 | 0.29041916 | 0.454545455 | 0.291666667 | 0.372093  | 0.372093  |
| ENSG00000185418 |            | 0.22121212 |            | 0.221212121 |             |           | 0.2383721 |
| ENSG00000011332 | 0.32035928 | 0.30898876 | 0.32035928 | 0.308988764 | 0.422619048 | 0.2674419 | 0.1477273 |
| ENSG00000154736 |            | 0.3969697  |            | 0.396969697 |             |           | 0.4767442 |
| ENSG00000105438 |            | 0.1969697  |            | 0.196969697 |             |           | 0.2732558 |
| ENSG00000075539 | 0.16467066 |            | 0.16467066 |             | 0.422619048 | 0.4186047 |           |
| ENSG00000176261 |            |            |            |             |             |           | 0.1104651 |
| ENSG00000225697 |            | 0.0969697  |            | 0.096969697 |             |           | 0.1046512 |
| ENSG00000100596 |            | 0.35534591 |            | 0.355345912 |             |           | 0.3863636 |
| ENSG00000109686 | 0.26047904 | 0.05555556 | 0.26047904 | 0.055555556 | 0.297619048 | 0.1860465 |           |
| ENSG00000140873 |            | 0.49390244 |            | 0.493902439 |             |           | 0.2848837 |
| ENSG00000183067 |            | 0.33030303 |            | 0.33030303  |             |           | 0.4302326 |
| ENSG00000179023 |            | 0.47560976 |            | 0.475609756 |             |           | 0.3488372 |
| ENSG00000147457 | 0.38068182 | 0.48484848 | 0.38068182 | 0.484848485 | 0.291666667 | 0.4764706 | 0.3863636 |
| ENSG00000107537 | 0.29166667 | 0.26666667 | 0.29166667 | 0.266666667 | 0.076923077 | 0.0595238 | 0.2383721 |
| ENSG00000099889 |            | 0.32012195 |            | 0.320121951 |             |           | 0.3647059 |
| ENSG00000134193 | 0.08682635 | 0.49425287 | 0.08682635 | 0.494252874 |             |           | 0.4011628 |
| ENSG00000180772 |            | 0.36363636 |            | 0.363636364 |             |           | 0.2965116 |
| ENSG00000161849 | 0.38922156 |            | 0.38922156 |             | 0.208333333 | 0.1823529 |           |
| ENSG00000129460 |            | 0.20496894 |            | 0.204968944 | 0.06547619  |           | 0.2951807 |
| ENSG00000130584 |            | 0.49074074 |            | 0.490740741 |             |           |           |
| ENSG00000196214 |            | 0.096875   |            | 0.096875    |             |           |           |
| ENSG00000198954 |            | 0.43636364 |            | 0.436363636 |             |           | 0.3837209 |
| ENSG00000072952 | 0.4760479  | 0.43636364 | 0.4760479  | 0.436363636 | 0.279761905 | 0.3197674 | 0.3546512 |
| ENSG00000182004 |            | 0.21666667 |            | 0.216666667 |             |           | 0.3409091 |
| ENSG00000178104 | 0.38202247 | 0.17857143 | 0.38202247 | 0.178571429 | 0.238095238 | 0.1818182 | 0.3963415 |
| ENSG00000136014 |            |            |            |             | 0.222222222 | 0.3295455 |           |
| ENSG00000197870 |            | 0.10909091 |            | 0.109090909 |             |           | 0.0988372 |
| ENSG00000100348 | 0.27840909 | 0.08841463 | 0.27840909 | 0.088414634 | 0.3         | 0.3181818 | 0.1162791 |
| ENSG00000165568 |            | 0.11585366 |            | 0.115853659 | 0.107142857 | 0.0930233 | 0.0930233 |
| ENSG00000149761 | 0.12352941 |            | 0.12352941 |             |             |           |           |
| ENSG00000068976 | 0.41017964 |            | 0.41017964 |             | 0.43452381  | 0.3953488 |           |
| ENSG00000086061 | 0.44318182 | 0.46428571 | 0.44318182 | 0.464285714 | 0.43902439  | 0.3823529 | 0.1477273 |
| ENSG00000137100 |            | 0.08282209 |            | 0.082822086 |             |           |           |
| ENSG00000114744 |            | 0.46666667 |            | 0.466666667 |             |           | 0.2906977 |
| ENSG00000166004 | 0.42222222 |            | 0.42222222 |             | 0.3         | 0.4886364 |           |
| ENSG00000126226 | 0.10479042 |            | 0.10479042 |             |             |           |           |
| ENSG00000139629 |            | 0.46363636 |            | 0.463636364 |             |           | 0.4666667 |
| ENSG00000113657 |            | 0.15454545 |            | 0.154545455 |             |           | 0.1802326 |
| ENSG00000178921 | 0.39820359 | 0.43209877 | 0.39820359 | 0.432098765 | 0.369047619 | 0.372093  | 0.1705882 |
| ENSG00000007545 |            | 0.21515152 |            | 0.215151515 |             |           | 0.4823529 |



|                 |            |            |            |             |             |           |           |
|-----------------|------------|------------|------------|-------------|-------------|-----------|-----------|
| ENSG00000163485 |            | 0.06666667 |            | 0.066666667 |             |           | 0.3430233 |
| ENSG0000022840  | 0.07784431 |            | 0.07784431 |             | 0.488095238 | 0.4476744 | 0.3181818 |
| ENSG00000176783 | 0.42814371 | 0.36666667 | 0.42814371 | 0.366666667 | 0.232142857 | 0.2647059 | 0.2738095 |
| ENSG00000258869 | 0.43712575 | 0.39090909 | 0.43712575 | 0.390909091 | 0.066666667 | 0.1117647 | 0.3023256 |
| ENSG00000170647 |            | 0.33030303 |            | 0.33030303  |             |           | 0.1444444 |
| ENSG00000174721 |            | 0.278125   |            | 0.278125    |             |           | 0.2083333 |
| ENSG00000161558 |            | 0.38109756 |            | 0.381097561 |             |           | 0.2383721 |
| ENSG00000106733 | 0.14371257 | 0.48181818 | 0.14371257 | 0.481818182 |             |           | 0.3068182 |
| ENSG00000154359 | 0.33532934 |            | 0.33532934 |             | 0.083333333 | 0.0639535 |           |
| ENSG00000135535 |            | 0.38787879 |            | 0.387878788 |             |           | 0.4583333 |
| ENSG00000135506 |            | 0.4        |            | 0.4         |             |           | 0.2727273 |
| ENSG00000144524 |            | 0.32424242 |            | 0.324242424 |             |           | 0.1627907 |
| ENSG00000166948 |            | 0.31111111 |            | 0.311111111 |             |           | 0.4666667 |
| ENSG00000172493 | 0.40662651 | 0.43939394 | 0.40662651 | 0.439393939 | 0.464285714 | 0.4534884 | 0.4476744 |
| ENSG00000173610 |            | 0.38650307 |            | 0.386503067 |             |           | 0.3235294 |
| ENSG00000164919 | 0.49101796 |            | 0.49101796 |             | 0.160714286 | 0.1104651 |           |
| ENSG00000183048 |            | 0.43865031 |            | 0.438650307 |             |           | 0.3690476 |
| ENSG00000148735 | 0.41317365 | 0.4030303  | 0.41317365 | 0.403030303 | 0.404761905 | 0.4651163 | 0.4302326 |
| ENSG00000124900 |            | 0.47619048 |            | 0.476190476 |             |           | 0.4411765 |
| ENSG00000162909 |            | 0.39329268 |            | 0.393292683 |             |           | 0.4518072 |
| ENSG00000076003 |            |            |            |             |             |           | 0.0697674 |
| ENSG00000177764 | 0.18862275 | 0.32424242 | 0.18862275 | 0.324242424 | 0.291666667 | 0.2965116 | 0.4302326 |
| ENSG00000254685 |            | 0.46319018 |            | 0.463190184 |             |           | 0.3333333 |
| ENSG00000177000 | 0.23652695 | 0.35955056 | 0.23652695 | 0.359550562 | 0.1         | 0.122093  | 0.1777778 |
| ENSG00000113327 |            | 0.41666667 |            | 0.416666667 |             |           | 0.4166667 |
| ENSG00000161921 |            | 0.30606061 |            | 0.306060606 |             |           | 0.4767442 |
| ENSG00000141429 |            |            |            |             |             |           | 0.3895349 |
| ENSG00000204539 | 0.44117647 | 0.48181818 | 0.44117647 | 0.481818182 | 0.444444444 | 0.4772727 | 0.3953488 |
| ENSG00000160180 | 0.09281437 |            | 0.09281437 |             |             |           |           |
| ENSG00000152944 | 0.2195122  | 0.37272727 | 0.2195122  | 0.372727273 |             |           |           |
| ENSG00000186625 |            |            |            |             |             |           | 0.2205882 |
| ENSG00000130294 |            | 0.46060606 |            | 0.460606061 |             |           | 0.25      |
| ENSG00000138468 |            | 0.43030303 |            | 0.43030303  |             |           | 0.3823529 |
| ENSG00000134762 |            | 0.49090909 |            | 0.490909091 |             |           | 0.4651163 |
| ENSG00000154380 |            | 0.28181818 |            | 0.281818182 |             |           | 0.3313953 |
| ENSG00000168395 |            | 0.48181818 |            | 0.481818182 |             |           | 0.3081395 |
| ENSG00000231389 |            | 0.16969697 |            | 0.16969697  |             |           | 0.4666667 |
| ENSG00000115252 |            | 0.47191011 |            | 0.471910112 |             |           | 0.3068182 |
| ENSG00000133116 |            | 0.14545455 |            | 0.145454545 |             |           | 0.3081395 |
| ENSG00000136783 |            | 0.2        |            | 0.2         |             |           | 0.125     |
| ENSG00000111732 |            | 0.05454545 |            | 0.054545455 |             |           | 0.0697674 |
| ENSG00000145949 | 0.13636364 | 0.48333333 | 0.13636364 | 0.483333333 |             |           | 0.4545455 |
| ENSG00000113303 | 0.30838323 |            | 0.30838323 |             | 0.422619048 | 0.3529412 |           |
| ENSG00000100614 | 0.44879518 | 0.21646341 | 0.44879518 | 0.216463415 | 0.166666667 | 0.1022727 | 0.1590909 |
| ENSG00000134531 | 0.36516854 | 0.46666667 | 0.36516854 | 0.466666667 |             |           | 0.4638554 |
| ENSG00000169071 | 0.4491018  | 0.08181818 | 0.4491018  | 0.081818182 | 0.291666667 | 0.3081395 | 0.1176471 |
| ENSG00000114790 | 0.48295455 | 0.36363636 | 0.48295455 | 0.363636364 | 0.422222222 | 0.4204545 | 0.3430233 |
| ENSG00000142046 | 0.26807229 | 0.42378049 | 0.26807229 | 0.423780488 | 0.476190476 | 0.4825581 | 0.494186  |
| ENSG00000215277 |            | 0.47865854 |            | 0.478658537 |             |           | 0.4709302 |
| ENSG00000162763 | 0.36363636 | 0.26666667 | 0.36363636 | 0.266666667 | 0.125       | 0.127907  | 0.1686047 |
| ENSG00000065243 |            | 0.43939394 |            | 0.439393939 | 0.345238095 | 0.3895349 | 0.4883721 |
| ENSG00000182093 |            | 0.35393258 |            | 0.353932584 |             |           | 0.4318182 |
| ENSG00000070882 | 0.08441558 | 0.30909091 | 0.08441558 | 0.309090909 |             |           | 0.255814  |
| ENSG00000176349 |            | 0.39090909 |            | 0.390909091 |             |           | 0.4176471 |

|                 |            |            |            |             |             |           |           |
|-----------------|------------|------------|------------|-------------|-------------|-----------|-----------|
| ENSG00000172992 |            | 0.3969697  |            | 0.396969697 |             |           | 0.3546512 |
| ENSG00000116001 |            |            |            |             |             |           | 0.1647059 |
| ENSG00000171204 |            | 0.16463415 |            | 0.164634146 |             |           | 0.4464286 |
| ENSG00000257103 |            | 0.43030303 |            | 0.43030303  |             |           |           |
| ENSG00000103356 |            | 0.12121212 |            | 0.121212121 |             |           | 0.255814  |
| ENSG00000106948 | 0.18562874 | 0.43902439 | 0.18562874 | 0.43902439  |             |           | 0.4244186 |
| ENSG00000173540 |            | 0.31515152 |            | 0.315151515 |             |           | 0.2383721 |
| ENSG00000135245 |            | 0.18292683 |            | 0.182926829 |             |           | 0.0952381 |
| ENSG00000143494 |            | 0.34242424 |            | 0.342424242 |             |           | 0.4593023 |
| ENSG00000025434 |            |            |            |             | 0.095238095 | 0.0930233 |           |
| ENSG00000090661 |            | 0.41573034 |            | 0.415730337 |             |           | 0.2333333 |
| ENSG00000100605 |            | 0.45731707 |            | 0.457317073 |             |           | 0.3313953 |
| ENSG00000187555 | 0.42222222 |            | 0.42222222 |             | 0.066666667 |           |           |
| ENSG00000165424 |            | 0.44848485 |            | 0.448484848 |             |           | 0.4709302 |
| ENSG00000162892 | 0.10179641 | 0.44545455 | 0.10179641 | 0.445454545 |             |           | 0.2732558 |
| ENSG00000170820 | 0.26047904 |            | 0.26047904 |             | 0.5         | 0.4825581 |           |
| ENSG00000106078 |            | 0.44444444 |            | 0.444444444 |             |           | 0.4111111 |
| ENSG00000227500 | 0.46407186 | 0.43209877 | 0.46407186 | 0.432098765 | 0.363095238 | 0.494186  | 0.494186  |
| ENSG00000155008 | 0.13636364 |            | 0.13636364 |             | 0.355555556 | 0.2727273 |           |
| ENSG00000130035 |            | 0.42378049 |            | 0.423780488 |             |           | 0.3430233 |
| ENSG00000143196 |            | 0.05813953 |            | 0.058139535 |             |           |           |
| ENSG00000205106 | 0.18862275 |            | 0.18862275 |             | 0.470238095 | 0.4588235 |           |
| ENSG00000163507 |            | 0.08787879 |            | 0.087878788 |             |           | 0.4285714 |
| ENSG00000066933 | 0.22727273 | 0.19886364 | 0.22727273 | 0.198863636 |             |           | 0.4069767 |
| ENSG00000169962 |            |            |            |             |             |           | 0.0639535 |
| ENSG00000214029 |            | 0.32777778 |            | 0.327777778 | 0.136904762 | 0.0697674 | 0.0714286 |
| ENSG00000081377 |            | 0.17575758 |            | 0.175757576 |             |           |           |
| ENSG00000135069 | 0.47777778 |            | 0.47777778 |             | 0.255555556 | 0.2954545 |           |
| ENSG00000248871 |            | 0.19090909 |            | 0.190909091 |             |           | 0.0823529 |
| ENSG00000106692 | 0.24157303 | 0.12121212 | 0.24157303 | 0.121212121 | 0.077777778 | 0.0568182 | 0.2058824 |
| ENSG00000011405 |            | 0.46363636 |            | 0.463636364 |             |           | 0.3409091 |
| ENSG00000136872 |            | 0.49444444 |            | 0.494444444 |             |           | 0.4555556 |
| ENSG00000162419 |            | 0.4695122  |            | 0.469512195 |             |           | 0.1941176 |
| ENSG00000091262 |            | 0.24085366 |            | 0.240853659 |             |           | 0.25      |
| ENSG00000255800 | 0.30864198 |            | 0.30864198 |             | 0.404761905 | 0.3658537 |           |
| ENSG00000196372 |            | 0.46363636 |            | 0.463636364 |             |           | 0.4886364 |
| ENSG00000222011 |            | 0.15       |            | 0.15        |             |           |           |
| ENSG00000100065 | 0.28888889 | 0.08787879 | 0.28888889 | 0.087878788 | 0.166666667 | 0.2555556 | 0.2790698 |
| ENSG00000139233 | 0.29444444 |            | 0.29444444 |             | 0.155555556 | 0.1022727 |           |
| ENSG00000242498 |            | 0.45121951 |            | 0.451219512 | 0.146341463 | 0.125     | 0.2848837 |
| ENSG00000148737 |            |            |            |             |             |           | 0.1395349 |
| ENSG00000197798 | 0.25149701 |            | 0.25149701 |             | 0.19047619  | 0.2209302 |           |
| ENSG00000157601 | 0.47777778 | 0.05617978 | 0.47777778 | 0.056179775 | 0.4         | 0.3977273 | 0.2386364 |
| ENSG00000158467 |            | 0.34545455 |            | 0.345454545 | 0.375       | 0.4127907 | 0.4476744 |
| ENSG00000139832 |            | 0.15116279 |            | 0.151162791 |             |           | 0.2840909 |
| ENSG00000101608 |            | 0.11818182 |            | 0.118181818 |             |           | 0.2848837 |
| ENSG00000187764 | 0.28313253 | 0.31818182 | 0.28313253 | 0.318181818 | 0.398809524 | 0.3809524 | 0.3837209 |
| ENSG00000108107 | 0.29041916 | 0.40449438 | 0.29041916 | 0.404494382 | 0.119047619 | 0.1337209 | 0.2272727 |
| ENSG00000015479 | 0.14371257 | 0.33333333 | 0.14371257 | 0.333333333 | 0.15060241  | 0.2790698 | 0.2790698 |
| ENSG00000071127 |            | 0.23780488 |            | 0.237804878 |             |           | 0.1117647 |
| ENSG00000100341 |            | 0.15454545 |            | 0.154545455 |             |           |           |
| ENSG00000133056 | 0.10778443 | 0.18888889 | 0.10778443 | 0.188888889 | 0.261904762 | 0.1976744 | 0.4593023 |
| ENSG00000011007 |            | 0.26060606 |            | 0.260606061 |             |           |           |
| ENSG00000133243 |            | 0.3030303  |            | 0.303030303 |             |           | 0.4176471 |

|                 |            |            |            |             |             |           |           |
|-----------------|------------|------------|------------|-------------|-------------|-----------|-----------|
| ENSG00000156804 |            | 0.23636364 |            | 0.236363636 |             |           | 0.3604651 |
| ENSG00000167996 |            |            |            |             |             |           | 0.2151163 |
| ENSG00000124743 | 0.11676647 | 0.36969697 | 0.11676647 | 0.36969697  |             |           | 0.3953488 |
| ENSG00000255622 |            | 0.42424242 |            | 0.424242424 |             |           | 0.4058824 |
| ENSG00000126003 |            | 0.45       |            | 0.45        |             |           | 0.3181818 |
| ENSG00000173406 |            | 0.23030303 |            | 0.23030303  |             |           | 0.4651163 |
| ENSG00000203684 | 0.11676647 |            | 0.11676647 |             |             |           |           |
| ENSG00000136867 |            | 0.28333333 |            | 0.283333333 |             |           | 0.4360465 |
| ENSG00000179142 |            | 0.4969697  |            | 0.496969697 |             |           | 0.3837209 |
| ENSG00000007129 | 0.44512195 | 0.27878788 | 0.44512195 | 0.278787879 | 0.44047619  | 0.494186  | 0.4709302 |
| ENSG00000198894 | 0.18888889 | 0.40243902 | 0.18888889 | 0.402439024 | 0.3         | 0.1704545 | 0.4882353 |
| ENSG00000121931 |            | 0.40606061 |            | 0.406060606 |             |           | 0.4709302 |
| ENSG00000114455 | 0.19161677 | 0.08333333 | 0.19161677 | 0.083333333 | 0.4         | 0.4772727 | 0.5       |
| ENSG00000198929 | 0.43674699 | 0.46666667 | 0.43674699 | 0.466666667 | 0.232142857 | 0.2209302 | 0.4127907 |
| ENSG00000100351 | 0.13333333 | 0.17575758 | 0.13333333 | 0.175757576 | 0.284090909 | 0.2159091 | 0.377907  |
| ENSG00000186166 |            | 0.37777778 |            | 0.377777778 |             |           | 0.1136364 |
| ENSG00000167257 |            | 0.44817073 |            | 0.448170732 |             |           |           |
| ENSG00000136950 |            | 0.13030303 |            | 0.13030303  |             |           |           |
| ENSG00000005882 | 0.19318182 | 0.47256098 | 0.19318182 | 0.472560976 | 0.297619048 | 0.375     | 0.3895349 |
| ENSG00000141449 |            | 0.23939394 |            | 0.239393939 |             |           |           |
| ENSG00000050767 |            | 0.45151515 |            | 0.451515152 |             |           | 0.3176471 |
| ENSG00000242689 |            | 0.49393939 |            | 0.493939394 |             |           | 0.3470588 |
| ENSG00000121039 |            | 0.1969697  |            | 0.196969697 |             |           | 0.0823529 |
| ENSG00000113555 |            | 0.46932515 |            | 0.469325153 |             |           | 0.122093  |
| ENSG00000196248 |            | 0.4        |            | 0.4         |             |           | 0.3       |
| ENSG00000188921 |            | 0.33636364 |            | 0.336363636 |             |           | 0.0813953 |
| ENSG00000243646 |            | 0.40853659 |            | 0.408536585 |             |           | 0.5       |
| ENSG00000146909 |            | 0.45151515 |            | 0.451515152 |             |           | 0.3139535 |
| ENSG00000068697 | 0.29341317 |            | 0.29341317 |             | 0.392857143 | 0.4186047 |           |
| ENSG00000185340 | 0.13888889 |            | 0.13888889 |             | 0.233333333 | 0.2954545 |           |
| ENSG00000169855 | 0.10179641 | 0.1969697  | 0.10179641 | 0.196969697 |             |           | 0.3452381 |
| ENSG00000142102 |            | 0.39655172 |            | 0.396551724 |             |           | 0.5       |
| ENSG00000152661 |            | 0.12921348 |            | 0.129213483 |             |           |           |
| ENSG00000116815 |            | 0.15168539 |            | 0.151685393 |             |           | 0.3409091 |
| ENSG00000172331 | 0.24550898 |            | 0.24550898 |             | 0.214285714 | 0.2209302 |           |
| ENSG00000148248 |            | 0.46646341 |            | 0.466463415 | 0.267857143 | 0.2117647 | 0.2840909 |
| ENSG00000056998 |            | 0.06481481 |            | 0.064814815 |             |           | 0.2678571 |
| ENSG00000156103 |            | 0.47878788 |            | 0.478787879 |             |           | 0.3690476 |
| ENSG00000169914 |            | 0.44817073 |            | 0.448170732 |             |           | 0.2093023 |
| ENSG00000128250 | 0.05389222 | 0.19444444 | 0.05389222 | 0.194444444 |             |           |           |
| ENSG00000182611 | 0.21686747 |            | 0.21686747 |             | 0.103658537 | 0.0813953 |           |
| ENSG00000100823 |            |            |            |             |             |           | 0.0523256 |
| ENSG00000187664 |            | 0.16363636 |            | 0.163636364 |             |           |           |
| ENSG00000006625 | 0.45209581 | 0.17878788 | 0.45209581 | 0.178787879 | 0.446428571 | 0.372093  | 0.5       |
| ENSG00000196277 |            | 0.23780488 |            | 0.237804878 |             |           | 0.1918605 |
| ENSG00000031691 |            | 0.39197531 |            | 0.391975309 |             |           | 0.3941176 |
| ENSG00000148156 | 0.34730539 |            | 0.34730539 |             | 0.446428571 | 0.4825581 |           |
| ENSG00000173198 |            | 0.23939394 |            | 0.239393939 |             |           | 0.494186  |
| ENSG00000243943 |            | 0.17878788 |            | 0.178787879 |             |           | 0.2790698 |
| ENSG00000198870 |            | 0.43939394 |            | 0.439393939 |             |           | 0.255814  |
| ENSG00000116406 |            | 0.5        |            | 0.5         |             |           | 0.4411765 |
| ENSG00000145365 | 0.17241379 | 0.5        | 0.17241379 | 0.5         | 0.377777778 | 0.3777778 | 0.1882353 |
| ENSG00000163069 |            | 0.43030303 |            | 0.43030303  |             |           | 0.3470588 |
| ENSG00000119878 |            | 0.40606061 |            | 0.406060606 |             |           | 0.1976744 |

|                 |            |            |            |             |             |           |           |
|-----------------|------------|------------|------------|-------------|-------------|-----------|-----------|
| ENSG00000116688 | 0.25449102 |            | 0.25449102 |             | 0.410714286 |           | 0.3604651 |
| ENSG00000121858 |            | 0.41158537 |            | 0.411585366 |             |           | 0.4127907 |
| ENSG0000013523  | 0.13173653 | 0.32317073 | 0.13173653 | 0.323170732 | 0.238095238 | 0.2647059 | 0.3546512 |
| ENSG00000122863 |            | 0.48484848 |            | 0.484848485 |             |           | 0.4302326 |
| ENSG00000173575 | 0.47305389 | 0.49375    | 0.47305389 | 0.49375     |             |           | 0.1235294 |
| ENSG00000173237 |            | 0.05660377 |            | 0.056603774 |             |           |           |
| ENSG00000089127 |            | 0.41860465 |            | 0.418604651 |             |           | 0.1590909 |
| ENSG00000163872 |            | 0.48181818 |            | 0.481818182 |             |           | 0.3895349 |
| ENSG00000112195 |            | 0.35555556 |            | 0.355555556 |             |           | 0.3295455 |
| ENSG00000172590 | 0.44011976 | 0.19393939 | 0.44011976 | 0.193939394 | 0.482142857 | 0.4418605 | 0.2965116 |
| ENSG00000188916 | 0.14371257 | 0.31790123 | 0.14371257 | 0.317901235 | 0.274390244 | 0.1941176 | 0.122093  |
| ENSG00000112773 |            | 0.33888889 |            | 0.338888889 |             |           | 0.2045455 |
| ENSG00000102081 |            | 0.23602484 |            | 0.236024845 |             |           | 0.4418605 |
| ENSG00000157214 | 0.35151515 | 0.22727273 | 0.35151515 | 0.227272727 | 0.369047619 | 0.4302326 | 0.5       |
| ENSG00000259289 | 0.19161677 |            | 0.19161677 |             | 0.066666667 |           |           |
| ENSG00000188086 | 0.3502994  |            | 0.3502994  |             | 0.066666667 | 0.1428571 |           |
| ENSG00000107593 |            | 0.10365854 |            | 0.103658537 |             |           | 0.1511628 |
| ENSG00000144908 |            | 0.17272727 |            | 0.172727273 |             |           | 0.2588235 |
| ENSG00000078898 |            | 0.26436782 |            | 0.264367816 |             |           | 0.1375    |
| ENSG00000123416 |            | 0.36280488 |            | 0.362804878 |             |           | 0.3255814 |
| ENSG00000240747 | 0.43636364 | 0.41818182 | 0.43636364 | 0.418181818 |             | 0.0755814 | 0.2906977 |
| ENSG00000253105 | 0.07784431 | 0.45555556 | 0.07784431 | 0.455555556 |             |           | 0.1136364 |
| ENSG00000185808 | 0.24550898 |            | 0.24550898 |             | 0.327380952 | 0.377907  |           |
| ENSG00000188690 | 0.33888889 | 0.49090909 | 0.33888889 | 0.490909091 | 0.311111111 | 0.3295455 | 0.3837209 |
| ENSG00000090372 |            | 0.2030303  |            | 0.203030303 |             |           | 0.4360465 |
| ENSG00000076513 | 0.33832335 | 0.06402439 | 0.33832335 | 0.06402439  | 0.05952381  | 0.1337209 | 0.1337209 |
| ENSG00000165548 | 0.22222222 | 0.32121212 | 0.22222222 | 0.321212121 | 0.177777778 | 0.0568182 | 0.3895349 |
| ENSG00000100490 | 0.44011976 | 0.44242424 | 0.44011976 | 0.442424242 | 0.30952381  | 0.244186  | 0.3372093 |
| ENSG00000140961 | 0.23652695 | 0.18181818 | 0.23652695 | 0.181818182 | 0.238095238 | 0.1976744 | 0.1918605 |
| ENSG00000023839 |            | 0.40606061 |            | 0.406060606 | 0.214285714 | 0.1918605 | 0.2093023 |
| ENSG00000100201 |            | 0.32727273 |            | 0.327272727 |             |           | 0.3837209 |
| ENSG00000160685 |            | 0.48181818 |            | 0.481818182 |             |           | 0.0581395 |
| ENSG00000088448 |            | 0.4        |            | 0.4         |             |           | 0.2034884 |
| ENSG00000136152 |            | 0.11666667 |            | 0.116666667 |             |           | 0.0568182 |
| ENSG00000100228 |            | 0.47777778 |            | 0.477777778 | 0.102272727 |           | 0.377907  |
| ENSG00000053918 |            | 0.38181818 |            | 0.381818182 |             |           | 0.1104651 |
| ENSG00000053108 |            | 0.48484848 |            | 0.484848485 |             |           | 0.4534884 |
| ENSG00000117602 |            | 0.46969697 |            | 0.46969697  |             |           | 0.2383721 |
| ENSG00000115350 |            | 0.23333333 |            | 0.233333333 |             |           | 0.1976744 |
| ENSG00000112739 |            | 0.35151515 |            | 0.351515152 |             |           | 0.1764706 |
| ENSG00000206418 |            | 0.13636364 |            | 0.136363636 |             |           |           |
| ENSG00000118785 |            | 0.19090909 |            | 0.190909091 |             |           | 0.4090909 |
| ENSG00000156413 | 0.0873494  | 0.31176471 | 0.0873494  | 0.311764706 | 0.302469136 | 0.3452381 | 0.3444444 |
| ENSG00000151623 | 0.18674699 | 0.43333333 | 0.18674699 | 0.433333333 | 0.273809524 | 0.3313953 | 0.1686047 |
| ENSG00000189184 |            | 0.375      |            | 0.375       |             |           | 0.4529412 |
| ENSG00000089775 | 0.05389222 |            | 0.05389222 |             | 0.202380952 | 0.2209302 |           |
| ENSG00000196177 | 0.11144578 | 0.42727273 | 0.11144578 | 0.427272727 | 0.101190476 | 0.1337209 | 0.2034884 |
| ENSG00000188425 |            | 0.16060606 |            | 0.160606061 |             |           | 0.2790698 |
| ENSG00000140481 | 0.39520958 | 0.37272727 | 0.39520958 | 0.372727273 | 0.5         | 0.3662791 | 0.3081395 |
| ENSG00000166546 |            | 0.09090909 |            | 0.090909091 |             |           | 0.1569767 |
| ENSG00000165752 |            | 0.43030303 |            | 0.43030303  |             |           | 0.3928571 |
| ENSG00000111832 |            | 0.30555556 |            | 0.305555556 |             |           | 0.375     |
| ENSG00000007923 |            | 0.33636364 |            | 0.336363636 |             |           | 0.4360465 |
| ENSG00000162600 | 0.33928571 | 0.46363636 | 0.33928571 | 0.463636364 | 0.094594595 |           | 0.3411765 |

|                 |            |            |            |             |             |           |           |
|-----------------|------------|------------|------------|-------------|-------------|-----------|-----------|
| ENSG00000125903 | 0.36516854 |            | 0.36516854 |             | 0.209302326 |           | 0.0888889 |
| ENSG00000110801 | 0.2        | 0.3        | 0.2        | 0.3         |             |           | 0.4651163 |
| ENSG00000188682 |            | 0.40909091 |            | 0.409090909 |             |           | 0.3974359 |
| ENSG00000167807 |            | 0.40490798 |            | 0.404907975 |             |           | 0.4534884 |
| ENSG00000186272 |            | 0.06481481 |            | 0.064814815 | 0.172619048 | 0.2151163 | 0.1744186 |
| ENSG00000124098 |            | 0.22222222 |            | 0.222222222 |             |           | 0.375     |
| ENSG00000137135 | 0.43674699 | 0.28787879 | 0.43674699 | 0.287878788 | 0.444444444 | 0.4090909 | 0.4411765 |
| ENSG00000110723 | 0.47191011 | 0.13414634 | 0.47191011 | 0.134146341 | 0.166666667 | 0.2222222 | 0.244186  |
| ENSG00000100918 | 0.4760479  |            | 0.4760479  |             | 0.464285714 |           | 0.4534884 |
| ENSG00000132972 |            |            |            |             | 0.285714286 |           | 0.1976744 |
| ENSG00000134874 |            | 0.48314607 |            | 0.483146067 |             |           | 0.3       |
| ENSG00000198488 |            | 0.3404908  |            | 0.340490798 | 0.307228916 | 0.2093023 | 0.2616279 |
| ENSG00000253953 |            | 0.20224719 |            | 0.202247191 |             |           | 0.1477273 |
| ENSG00000134321 | 0.35555556 | 0.35795455 | 0.35555556 | 0.357954545 |             |           | 0.2666667 |
| ENSG00000166426 |            |            |            |             | 0.363095238 | 0.3941176 |           |
| ENSG00000008118 |            | 0.34242424 |            | 0.342424242 |             |           | 0.1046512 |
| ENSG00000163636 | 0.15868263 | 0.17575758 | 0.15868263 | 0.175757576 | 0.119047619 | 0.0813953 | 0.1705882 |
| ENSG00000140905 |            | 0.10365854 |            | 0.103658537 |             |           | 0.2272727 |
| ENSG00000112561 |            | 0.3961039  |            | 0.396103896 |             |           | 0.2560976 |
| ENSG00000159885 | 0.2994012  |            | 0.2994012  |             |             |           |           |
| ENSG00000087916 |            | 0.46629213 |            | 0.466292135 |             |           | 0.4345238 |
| ENSG00000204186 |            | 0.35151515 |            | 0.351515152 |             |           | 0.4069767 |
| ENSG00000118690 |            | 0.13030303 |            | 0.13030303  |             |           | 0.0639535 |
| ENSG00000198551 |            | 0.41818182 |            | 0.418181818 |             |           | 0.2151163 |
| ENSG00000187446 |            | 0.19325153 |            | 0.193251534 |             |           |           |
| ENSG00000178802 |            | 0.40243902 |            | 0.402439024 |             |           | 0.3023256 |
| ENSG00000136840 |            | 0.08181818 |            | 0.081818182 |             |           | 0.2093023 |
| ENSG00000205081 |            |            |            |             |             |           | 0.1818182 |
| ENSG00000152672 |            |            |            |             |             |           | 0.0888889 |
| ENSG00000143319 | 0.13939394 | 0.09444444 | 0.13939394 | 0.094444444 | 0.096385542 | 0.0833333 |           |
| ENSG00000081803 | 0.36526946 | 0.21818182 | 0.36526946 | 0.218181818 | 0.416666667 | 0.377907  | 0.127907  |
| ENSG00000204427 |            | 0.30909091 |            | 0.309090909 |             |           | 0.4302326 |
| ENSG00000101191 |            | 0.31212121 |            | 0.312121212 |             |           | 0.377907  |
| ENSG00000113761 |            | 0.5        |            | 0.5         |             |           | 0.4244186 |
| ENSG00000100433 | 0.45209581 | 0.33333333 | 0.45209581 | 0.333333333 | 0.113095238 | 0.1488095 | 0.494186  |
| ENSG00000178199 | 0.07386364 | 0.12424242 | 0.07386364 | 0.124242424 | 0.292682927 | 0.3953488 | 0.3705882 |
| ENSG00000120688 |            | 0.14848485 |            | 0.148484848 |             |           | 0.1046512 |
| ENSG00000059728 |            | 0.49691358 |            | 0.49691358  |             |           | 0.3352941 |
| ENSG00000133316 | 0.15       |            | 0.15       |             | 0.1         | 0.1363636 | 0.1511628 |
| ENSG00000145354 |            | 0.49444444 |            | 0.494444444 |             |           | 0.4767442 |
| ENSG00000131016 |            | 0.33333333 |            | 0.333333333 |             |           | 0.4476744 |
| ENSG00000184898 |            | 0.45151515 |            | 0.451515152 |             |           | 0.4709302 |
| ENSG00000225614 |            | 0.18333333 |            | 0.183333333 |             |           | 0.0568182 |
| ENSG00000166578 | 0.14670659 | 0.13333333 | 0.14670659 | 0.133333333 | 0.067073171 | 0.1104651 |           |
| ENSG00000150051 |            | 0.3969697  |            | 0.396969697 |             |           | 0.3888889 |
| ENSG00000168497 |            | 0.46646341 |            | 0.466463415 |             |           | 0.3235294 |
| ENSG00000169733 |            |            |            |             |             |           | 0.1627907 |
| ENSG00000162344 |            | 0.21212121 |            | 0.212121212 |             |           | 0.4302326 |
| ENSG00000189367 |            | 0.41818182 |            | 0.418181818 | 0.369047619 | 0.3313953 | 0.0697674 |
| ENSG00000110031 |            | 0.49431818 |            | 0.494318182 |             |           | 0.3571429 |
| ENSG00000103642 | 0.08383234 | 0.3030303  | 0.08383234 | 0.303030303 |             |           |           |
| ENSG00000109501 | 0.09281437 | 0.34242424 | 0.09281437 | 0.342424242 | 0.130952381 | 0.1395349 | 0.0813953 |
| ENSG00000145358 |            | 0.44512195 |            | 0.445121951 |             |           | 0.3941176 |
| ENSG00000105676 | 0.37125749 |            | 0.37125749 |             | 0.136904762 | 0.1046512 |           |

|                 |            |            |            |             |             |           |           |
|-----------------|------------|------------|------------|-------------|-------------|-----------|-----------|
| ENSG00000169933 |            | 0.41104294 |            | 0.411042945 |             |           | 0.2790698 |
| ENSG00000162882 | 0.12068966 | 0.07575758 | 0.12068966 | 0.075757576 | 0.277777778 | 0.1931818 | 0.1071429 |
| ENSG00000217442 | 0.24251497 |            | 0.24251497 |             |             |           |           |
| ENSG00000157837 | 0.46084337 | 0.48780488 | 0.46084337 | 0.487804878 | 0.452380952 | 0.4709302 | 0.4702381 |
| ENSG00000178163 |            | 0.37575758 |            | 0.375757576 |             |           | 0.2034884 |
| ENSG00000108515 | 0.21666667 | 0.41818182 | 0.21666667 | 0.418181818 | 0.244444444 | 0.1022727 | 0.4069767 |
| ENSG00000177425 |            | 0.1741573  |            | 0.174157303 |             |           | 0.2325581 |
| ENSG00000177034 |            | 0.375      |            | 0.375       |             |           | 0.4709302 |
| ENSG00000112796 |            | 0.44545455 |            | 0.445454545 | 0.277777778 | 0.2444444 | 0.452381  |
| ENSG00000070010 | 0.46111111 | 0.49382716 | 0.46111111 | 0.49382716  | 0.344444444 | 0.375     | 0.2906977 |
| ENSG00000136928 |            | 0.29310345 |            | 0.293103448 |             |           | 0.3522727 |
| ENSG00000149443 | 0.0988024  |            | 0.0988024  |             | 0.416666667 | 0.3081395 |           |
| ENSG00000106591 |            | 0.16111111 |            | 0.161111111 |             |           | 0.0897436 |
| ENSG00000138814 | 0.05988024 | 0.08484848 | 0.05988024 | 0.084848485 |             |           | 0.1453488 |
| ENSG00000197614 |            | 0.12121212 |            | 0.121212121 |             |           |           |
| ENSG00000075240 | 0.16111111 | 0.47777778 | 0.16111111 | 0.477777778 |             |           | 0.4659091 |
| ENSG00000198327 | 0.23939394 |            | 0.23939394 |             | 0.130952381 | 0.1162791 |           |
| ENSG00000102034 |            | 0.23780488 |            | 0.237804878 |             |           | 0.3295455 |
| ENSG00000159409 |            | 0.0969697  |            | 0.096969697 |             |           | 0.2093023 |
| ENSG00000002933 |            | 0.06896552 |            | 0.068965517 |             |           | 0.0681818 |
| ENSG00000104518 | 0.18888889 |            | 0.18888889 |             |             |           |           |
| ENSG00000172554 |            | 0.26969697 |            | 0.26969697  |             |           | 0.2965116 |
| ENSG00000186575 |            | 0.47777778 |            | 0.477777778 |             |           | 0.494186  |
| ENSG00000196455 | 0.2754491  |            | 0.2754491  |             | 0.482142857 | 0.4294118 |           |
| ENSG00000159079 |            | 0.17378049 |            | 0.173780488 |             |           | 0.3313953 |
| ENSG00000164393 | 0.49382716 | 0.3902439  | 0.49382716 | 0.390243902 | 0.295180723 | 0.3072289 | 0.2831325 |
| ENSG00000090621 |            | 0.23030303 |            | 0.23030303  |             |           | 0.1104651 |
| ENSG00000180537 |            | 0.5        |            | 0.5         |             |           | 0.4647059 |
| ENSG00000132849 | 0.5        | 0.42378049 | 0.5        | 0.423780488 | 0.432926829 | 0.4011628 | 0.0764706 |
| ENSG00000141665 |            |            |            |             | 0.162650602 | 0.1511628 |           |
| ENSG00000148948 | 0.25       |            | 0.25       |             | 0.077777778 | 0.0777778 |           |
| ENSG00000180616 |            | 0.21515152 |            | 0.215151515 |             |           | 0.372093  |
| ENSG00000110651 | 0.41017964 |            | 0.41017964 |             |             |           |           |
| ENSG00000131844 |            | 0.30337079 |            | 0.303370787 |             |           | 0.4886364 |
| ENSG00000149798 | 0.0505618  |            | 0.0505618  |             |             |           | 0.2159091 |
| ENSG00000162378 | 0.25149701 | 0.35555556 | 0.25149701 | 0.355555556 | 0.327380952 | 0.3023256 | 0.2840909 |
| ENSG00000179218 |            | 0.41212121 |            | 0.412121212 |             |           | 0.2325581 |
| ENSG00000110048 |            | 0.06363636 |            | 0.063636364 |             |           | 0.0930233 |
| ENSG00000154721 |            | 0.16860465 |            | 0.168604651 |             |           | 0.3636364 |
| ENSG00000169230 |            | 0.08484848 |            | 0.084848485 |             |           | 0.4476744 |
| ENSG00000155463 | 0.43413174 |            | 0.43413174 |             | 0.196428571 | 0.1511628 |           |
| ENSG00000089505 | 0.18604651 |            | 0.18604651 |             |             |           |           |
| ENSG00000166407 | 0.3502994  |            | 0.3502994  |             | 0.226190476 | 0.2906977 |           |
| ENSG00000183098 |            |            |            |             | 0.071428571 | 0.0581395 |           |
| ENSG00000130165 |            | 0.17878788 |            | 0.178787879 |             |           | 0.0930233 |
| ENSG00000116984 | 0.06666667 | 0.43251534 | 0.06666667 | 0.432515337 |             | 0.0666667 | 0.3253012 |
| ENSG00000144566 | 0.35795455 | 0.14367816 | 0.35795455 | 0.143678161 | 0.188888889 | 0.1477273 | 0.1162791 |
| ENSG00000145626 |            | 0.47575758 |            | 0.475757576 |             |           | 0.3023256 |
| ENSG00000150401 |            | 0.37272727 |            | 0.372727273 |             |           | 0.3662791 |
| ENSG00000002549 |            | 0.35       |            | 0.35        |             |           |           |
| ENSG00000101189 |            | 0.44545455 |            | 0.445454545 |             |           | 0.4302326 |
| ENSG00000102383 | 0.12       | 0.20909091 | 0.12       | 0.209090909 | 0.060240964 |           |           |
| ENSG00000162878 |            | 0.325      |            | 0.325       |             |           | 0.4939024 |
| ENSG00000140259 | 0.34730539 |            | 0.34730539 |             | 0.327380952 | 0.255814  |           |

|                 |            |            |            |             |             |           |           |
|-----------------|------------|------------|------------|-------------|-------------|-----------|-----------|
| ENSG00000169435 |            | 0.11656442 |            | 0.116564417 | 0.363095238 | 0.2732558 | 0.1744186 |
| ENSG00000117528 | 0.09393939 | 0.21036585 | 0.09393939 | 0.210365854 | 0.297619048 | 0.1764706 | 0.4244186 |
| ENSG00000181826 | 0.33522727 |            | 0.33522727 |             | 0.125       | 0.0568182 | 0.3068182 |
| ENSG00000127863 |            | 0.29090909 |            | 0.290909091 |             |           | 0.4011628 |
| ENSG00000204421 | 0.16167665 | 0.18484848 | 0.16167665 | 0.184848485 | 0.130952381 | 0.0930233 | 0.3430233 |
| ENSG00000147251 |            | 0.17222222 |            | 0.172222222 |             |           | 0.1453488 |
| ENSG00000133216 | 0.38323353 |            | 0.38323353 |             | 0.385542169 | 0.4069767 |           |
| ENSG00000169239 |            | 0.46932515 |            | 0.469325153 |             |           | 0.4207317 |
| ENSG00000142632 |            | 0.23333333 |            | 0.233333333 |             |           | 0.1337209 |
| ENSG00000059122 | 0.49700599 | 0.47575758 | 0.49700599 | 0.475757576 | 0.321428571 | 0.3197674 | 0.439759  |
| ENSG00000100302 |            | 0.35757576 |            | 0.357575758 |             |           | 0.4593023 |
| ENSG00000213937 |            |            |            |             | 0.363095238 | 0.4360465 |           |
| ENSG00000196981 |            | 0.43030303 |            | 0.43030303  |             |           | 0.3444444 |
| ENSG00000186431 | 0.29041916 | 0.1969697  | 0.29041916 | 0.196969697 | 0.339285714 | 0.3764706 |           |
| ENSG00000184697 |            | 0.20606061 |            | 0.206060606 |             |           | 0.2848837 |
| ENSG00000170634 |            | 0.22839506 |            | 0.228395062 |             |           | 0.2926829 |
| ENSG00000105821 | 0.30898876 | 0.14444444 | 0.30898876 | 0.144444444 | 0.3         | 0.4090909 |           |
| ENSG00000145451 |            | 0.40555556 |            | 0.405555556 |             |           | 0.4772727 |
| ENSG00000101152 |            | 0.06666667 |            | 0.066666667 |             |           | 0.1046512 |
| ENSG00000203690 |            | 0.38181818 |            | 0.381818182 |             |           | 0.3023256 |
| ENSG00000173110 |            | 0.34       |            | 0.34        |             |           | 0.3378378 |
| ENSG00000130396 |            | 0.37272727 |            | 0.372727273 |             |           | 0.3953488 |
| ENSG00000133943 | 0.32777778 | 0.38414634 | 0.32777778 | 0.384146341 | 0.1         | 0.1144578 | 0.1453488 |
| ENSG00000111817 | 0.08383234 | 0.35403727 | 0.08383234 | 0.354037267 | 0.422222222 | 0.3522727 | 0.122093  |
| ENSG00000189319 |            | 0.47727273 |            | 0.477272727 |             |           | 0.4302326 |
| ENSG00000122574 |            | 0.41818182 |            | 0.418181818 |             |           | 0.3430233 |
| ENSG00000131738 |            |            |            |             |             |           | 0.0639535 |
| ENSG00000157823 | 0.48493976 | 0.48773006 | 0.48493976 | 0.487730061 | 0.416666667 | 0.3372093 | 0.3764706 |
| ENSG00000136160 |            | 0.11212121 |            | 0.112121212 |             |           |           |
| ENSG00000109674 |            | 0.2208589  |            | 0.220858896 | 0.279761905 | 0.2941176 | 0.4767442 |
| ENSG00000170231 |            | 0.36931818 |            | 0.369318182 |             |           | 0.3837209 |
| ENSG00000132640 |            | 0.47575758 |            | 0.475757576 |             |           | 0.3837209 |
| ENSG00000154839 | 0.11666667 | 0.30909091 | 0.11666667 | 0.309090909 | 0.111111111 | 0.1444444 | 0.4186047 |
| ENSG00000163581 |            | 0.29573171 |            | 0.295731707 |             |           | 0.2383721 |
| ENSG00000109132 |            | 0.38484848 |            | 0.384848485 |             |           | 0.2093023 |
| ENSG00000249034 |            | 0.41666667 |            | 0.416666667 |             |           | 0.4431818 |
| ENSG00000188761 |            | 0.31707317 |            | 0.317073171 |             |           | 0.1058824 |
| ENSG00000196693 |            | 0.38764045 |            | 0.387640449 |             |           | 0.4318182 |
| ENSG00000177943 |            | 0.25454545 |            | 0.254545455 |             |           | 0.1046512 |
| ENSG00000176945 |            | 0.44848485 |            | 0.448484848 |             |           | 0.3837209 |
| ENSG00000204365 | 0.19461078 | 0.23780488 | 0.19461078 | 0.237804878 | 0.25        | 0.2647059 | 0.3313953 |
| ENSG00000165716 | 0.30625    |            | 0.30625    |             | 0.192771084 | 0.1046512 |           |
| ENSG00000177710 | 0.13043478 |            | 0.13043478 |             |             |           |           |
| ENSG00000172840 |            | 0.09393939 |            | 0.093939394 |             |           | 0.1569767 |
| ENSG00000148331 |            | 0.45555556 |            | 0.455555556 |             |           | 0.5       |
| ENSG00000205784 |            | 0.32727273 |            | 0.327272727 |             |           |           |
| ENSG00000075151 |            |            |            |             |             | 0.0523256 |           |
| ENSG00000142686 | 0.09580838 |            | 0.09580838 |             |             |           | 0.3488372 |
| ENSG00000165804 | 0.28888889 | 0.18965517 | 0.28888889 | 0.189655172 | 0.411111111 | 0.4772727 | 0.3181818 |
| ENSG00000112697 | 0.22155689 | 0.05952381 | 0.22155689 | 0.05952381  | 0.452380952 | 0.4069767 | 0.1428571 |
| ENSG00000176236 |            | 0.15757576 |            | 0.157575758 |             |           |           |
| ENSG00000105221 |            | 0.5        |            | 0.5         | 0.301204819 | 0.3470588 | 0.4476744 |
| ENSG00000197905 | 0.05722892 |            | 0.05722892 |             | 0.125       | 0.0921053 |           |
| ENSG00000132561 |            | 0.35151515 |            | 0.351515152 |             |           | 0.3588235 |

|                 |            |            |            |             |             |           |           |
|-----------------|------------|------------|------------|-------------|-------------|-----------|-----------|
| ENSG00000205808 | 0.08682635 | 0.28651685 | 0.08682635 | 0.286516854 | 0.261904762 | 0.3023256 | 0.2732558 |
| ENSG00000165471 |            | 0.42424242 |            | 0.424242424 |             |           | 0.3953488 |
| ENSG00000101745 | 0.06741573 | 0.39393939 | 0.06741573 | 0.393939394 |             | 0.1860465 | 0.4883721 |
| ENSG00000151176 |            |            |            |             |             |           | 0.0813953 |
| ENSG00000103995 | 0.15269461 | 0.18965517 | 0.15269461 | 0.189655172 | 0.321428571 | 0.2790698 | 0.4886364 |
| ENSG00000117289 |            |            |            |             | 0.202380952 | 0.255814  | 0.3235294 |
| ENSG00000242852 |            | 0.19393939 |            | 0.193939394 |             |           | 0.4418605 |
| ENSG00000075142 |            | 0.29573171 |            | 0.295731707 |             |           | 0.0941176 |
| ENSG00000148219 | 0.29310345 | 0.47777778 | 0.29310345 | 0.477777778 | 0.476190476 | 0.4302326 | 0.2840909 |
| ENSG00000228716 |            |            |            |             | 0.392857143 | 0.2790698 |           |
| ENSG00000184351 |            | 0.43292683 |            | 0.432926829 |             |           | 0.4       |
| ENSG00000166073 |            | 0.36503067 |            | 0.365030675 |             |           | 0.2732558 |
| ENSG00000176177 |            | 0.09090909 |            | 0.090909091 |             |           | 0.0581395 |
| ENSG00000104660 |            |            |            |             |             |           | 0.1744186 |
| ENSG00000100307 |            | 0.48850575 |            | 0.488505747 |             |           | 0.4302326 |
| ENSG00000130822 | 0.11676647 |            | 0.11676647 |             | 0.142857143 | 0.127907  |           |
| ENSG00000179262 |            |            |            |             |             |           | 0.0909091 |
| ENSG00000028203 |            | 0.490625   |            | 0.490625    |             |           | 0.4886364 |
| ENSG00000197893 | 0.49101796 |            | 0.49101796 |             | 0.279761905 | 0.2093023 |           |
| ENSG00000174444 |            | 0.10060976 |            | 0.100609756 |             |           | 0.4709302 |
| ENSG00000170653 |            | 0.13939394 |            | 0.139393939 |             |           | 0.1235294 |
| ENSG00000102786 |            | 0.40555556 |            | 0.405555556 |             |           | 0.2272727 |
| ENSG00000204463 | 0.30838323 |            | 0.30838323 |             | 0.398809524 | 0.4333333 |           |
| ENSG00000203871 | 0.37222222 | 0.29310345 | 0.37222222 | 0.293103448 | 0.188888889 | 0.1931818 | 0.1931818 |
| ENSG00000090097 | 0.34431138 |            | 0.34431138 |             | 0.095238095 |           |           |
| ENSG00000146648 |            | 0.41573034 |            | 0.415730337 |             |           | 0.4431818 |
| ENSG00000054965 |            | 0.21515152 |            | 0.215151515 |             |           | 0.0930233 |
| ENSG00000115828 | 0.23652695 | 0.06321839 | 0.23652695 | 0.063218391 | 0.494047619 | 0.3953488 | 0.4302326 |
| ENSG00000161999 |            | 0.17272727 |            | 0.172727273 |             |           |           |
| ENSG00000139797 |            | 0.07222222 |            | 0.072222222 |             |           | 0.1022727 |
| ENSG00000106785 | 0.46706587 | 0.27575758 | 0.46706587 | 0.275757576 |             |           | 0.0930233 |
| ENSG00000176393 | 0.37724551 |            | 0.37724551 |             | 0.392857143 | 0.3953488 |           |
| ENSG00000105251 | 0.30538922 |            | 0.30538922 |             | 0.446428571 | 0.3604651 |           |
| ENSG00000171953 |            |            |            |             |             |           | 0.0523256 |
| ENSG00000176769 |            | 0.4030303  |            | 0.403030303 |             |           | 0.3764706 |
| ENSG00000100867 | 0.49401198 |            | 0.49401198 |             | 0.214285714 | 0.122093  |           |
| ENSG00000164404 | 0.47305389 |            | 0.47305389 |             | 0.214285714 | 0.2267442 |           |
| ENSG00000113456 |            | 0.07621951 |            | 0.076219512 | 0.055555556 |           | 0.4294118 |
| ENSG00000176834 |            | 0.44242424 |            | 0.442424242 |             |           | 0.4767442 |
| ENSG00000177873 | 0.47005988 | 0.33030303 | 0.47005988 | 0.33030303  | 0.397590361 | 0.4       | 0.4360465 |
| ENSG00000145416 | 0.19879518 | 0.5        | 0.19879518 | 0.5         |             |           | 0.4593023 |
| ENSG00000119946 |            | 0.22121212 |            | 0.221212121 |             |           | 0.3522727 |
| ENSG00000162607 | 0.11676647 | 0.34848485 | 0.11676647 | 0.348484848 |             |           | 0.1686047 |
| ENSG00000132386 | 0.16470588 |            | 0.16470588 |             |             | 0.1219512 |           |
| ENSG00000142694 |            |            |            |             | 0.06547619  | 0.1104651 |           |
| ENSG00000158825 |            |            |            |             | 0.06547619  | 0.0523256 |           |
| ENSG00000135077 | 0.2754491  | 0.16666667 | 0.2754491  | 0.166666667 |             |           |           |
| ENSG00000125868 |            |            |            |             |             |           | 0.0930233 |
| ENSG00000166329 |            | 0.48484848 |            | 0.484848485 |             |           | 0.4647059 |
| ENSG00000183808 | 0.45808383 | 0.33125    | 0.45808383 | 0.33125     | 0.493975904 | 0.4294118 | 0.4285714 |
| ENSG00000035720 |            | 0.24242424 |            | 0.242424242 |             |           | 0.4651163 |
| ENSG00000181991 | 0.36666667 |            | 0.36666667 |             |             |           |           |
| ENSG00000141385 |            | 0.21666667 |            | 0.216666667 |             |           | 0.3837209 |
| ENSG00000169715 |            | 0.14634146 |            | 0.146341463 |             |           | 0.2151163 |



|                 |            |            |            |             |             |           |           |
|-----------------|------------|------------|------------|-------------|-------------|-----------|-----------|
| ENSG00000160207 | 0.47777778 | 0.44242424 | 0.47777778 | 0.44242424  | 0.18888889  | 0.2272727 | 0.1860465 |
| ENSG00000146147 |            | 0.10625    |            | 0.10625     |             |           | 0.1918605 |
| ENSG00000177272 |            | 0.31515152 |            | 0.31515151  |             |           | 0.4047619 |
| ENSG00000239857 | 0.05113636 | 0.29393939 | 0.05113636 | 0.293939394 | 0.21111111  | 0.1022727 | 0.2906977 |
| ENSG00000124762 |            |            |            |             |             |           | 0.4011628 |
| ENSG00000063601 |            | 0.43209877 |            | 0.432098765 |             |           | 0.2228916 |
| ENSG00000137878 |            | 0.2        |            | 0.2         | 0.426829268 | 0.494186  | 0.4244186 |
| ENSG00000184967 | 0.45808383 |            | 0.45808383 |             | 0.488095238 | 0.4069767 |           |
| ENSG00000156162 |            | 0.1        |            | 0.1         |             |           | 0.0581395 |
| ENSG00000144591 | 0.25449102 |            | 0.25449102 |             | 0.18452381  | 0.2093023 |           |
| ENSG00000141750 |            | 0.44848485 |            | 0.448484848 |             |           | 0.3313953 |
| ENSG00000141194 |            | 0.24848485 |            | 0.248484848 |             |           | 0.1162791 |
| ENSG00000196781 | 0.06111111 | 0.11515152 | 0.06111111 | 0.115151515 | 0.144444444 | 0.1363636 |           |
| ENSG00000134248 | 0.38622754 |            | 0.38622754 |             | 0.455555556 | 0.4886364 |           |
| ENSG00000169760 | 0.3742515  | 0.47575758 | 0.3742515  | 0.475757576 | 0.386904762 | 0.4476744 | 0.4476744 |
| ENSG00000136999 |            | 0.2        |            | 0.2         |             |           | 0.1860465 |
| ENSG00000188176 | 0.26946108 |            | 0.26946108 |             | 0.202380952 | 0.244186  |           |
| ENSG00000140876 |            |            |            |             |             |           | 0.3095238 |
| ENSG00000173465 |            | 0.07303371 |            | 0.073033708 |             |           | 0.0568182 |
| ENSG00000171574 | 0.08682635 | 0.47575758 | 0.08682635 | 0.475757576 | 0.06547619  |           | 0.3555556 |
| ENSG00000100239 |            | 0.27272727 |            | 0.272727273 |             |           | 0.0581395 |
| ENSG00000151229 |            | 0.35       |            | 0.35        |             |           | 0.3837209 |
| ENSG00000149926 | 0.22754491 |            | 0.22754491 |             | 0.391566265 | 0.2790698 |           |
| ENSG00000173930 |            | 0.14329268 |            | 0.143292683 |             |           | 0.1627907 |
| ENSG00000204310 |            | 0.45757576 |            | 0.457575758 | 0.060240964 | 0.0783133 | 0.4244186 |
| ENSG00000142794 | 0.47159091 |            | 0.47159091 |             | 0.11111111  | 0.2613636 |           |
| ENSG00000174171 | 0.25149701 | 0.12883436 | 0.25149701 | 0.128834356 | 0.261904762 | 0.2325581 |           |
| ENSG00000167775 | 0.38823529 |            | 0.38823529 |             |             |           |           |
| ENSG00000135503 |            | 0.22560976 |            | 0.225609756 |             |           | 0.4302326 |
| ENSG00000065621 | 0.39444444 |            | 0.39444444 |             | 0.154761905 | 0.1627907 |           |
| ENSG00000143178 | 0.05688623 | 0.43939394 | 0.05688623 | 0.439393939 |             |           | 0.5       |
| ENSG00000198018 |            | 0.48701299 |            | 0.487012987 |             |           | 0.4487179 |
| ENSG00000147416 |            | 0.10909091 |            | 0.109090909 |             |           | 0.0639535 |
| ENSG00000185053 |            | 0.13333333 |            | 0.133333333 |             |           |           |
| ENSG00000204694 | 0.14670659 | 0.36196319 | 0.14670659 | 0.36196319  | 0.255555556 | 0.2111111 | 0.4360465 |
| ENSG00000136688 |            | 0.32424242 |            | 0.324242424 |             |           |           |
| ENSG00000172687 | 0.23652695 |            | 0.23652695 |             | 0.289156627 | 0.3372093 | 0.3181818 |
| ENSG00000120471 | 0.1741573  | 0.29090909 | 0.1741573  | 0.290909091 | 0.477777778 | 0.4302326 | 0.2267442 |
| ENSG00000145725 |            | 0.36111111 |            | 0.361111111 |             |           | 0.4883721 |
| ENSG00000241839 |            | 0.44409938 |            | 0.444099379 |             |           | 0.1569767 |
| ENSG00000198464 |            | 0.3        |            | 0.3         |             |           | 0.3295455 |
| ENSG00000198863 |            | 0.11890244 |            | 0.118902439 |             |           |           |
| ENSG00000146094 | 0.21604938 | 0.46666667 | 0.21604938 | 0.466666667 | 0.23255814  | 0.1309524 | 0.375     |
| ENSG00000178093 | 0.16455696 |            | 0.16455696 |             |             |           |           |
| ENSG00000106344 |            | 0.3597561  |            | 0.359756098 |             |           | 0.4825581 |
| ENSG00000089356 |            | 0.42307692 |            | 0.423076923 |             |           | 0.4244186 |
| ENSG00000159640 | 0.43820225 |            | 0.43820225 |             | 0.244444444 | 0.4431818 |           |
| ENSG00000103174 |            | 0.5        |            | 0.5         |             |           | 0.3953488 |
| ENSG00000150394 |            | 0.21036585 |            | 0.210365854 |             |           | 0.3837209 |
| ENSG00000221823 |            | 0.26219512 |            | 0.262195122 |             |           | 0.1627907 |
| ENSG00000100890 | 0.46706587 | 0.15757576 | 0.46706587 | 0.157575758 | 0.422619048 | 0.4318182 |           |
| ENSG00000182909 |            |            |            |             |             |           | 0.1046512 |
| ENSG00000033178 |            | 0.49431818 |            | 0.494318182 |             |           | 0.4390244 |
| ENSG00000180628 |            | 0.41515152 |            | 0.415151515 |             |           | 0.1190476 |

|                 |            |            |            |             |             |           |           |
|-----------------|------------|------------|------------|-------------|-------------|-----------|-----------|
| ENSG00000151611 | 0.35628743 | 0.25151515 | 0.35628743 | 0.251515152 | 0.470238095 | 0.4825581 | 0.494186  |
| ENSG00000178462 |            | 0.24242424 |            | 0.242424242 |             |           | 0.1802326 |
| ENSG00000007341 |            | 0.47256098 |            | 0.472560976 |             |           | 0.3662791 |
| ENSG00000080854 |            | 0.41212121 |            | 0.412121212 |             |           | 0.3139535 |
| ENSG00000152467 |            | 0.30981595 |            | 0.309815951 |             |           | 0.2674419 |
| ENSG00000158006 | 0.33888889 | 0.22727273 | 0.33888889 | 0.227272727 | 0.369047619 | 0.255814  | 0.1686047 |
| ENSG00000197372 | 0.14444444 |            | 0.14444444 |             |             |           |           |
| ENSG00000132423 | 0.11676647 |            | 0.11676647 |             | 0.494047619 | 0.3837209 |           |
| ENSG00000128203 |            | 0.48888889 |            | 0.488888889 |             |           | 0.3977273 |
| ENSG00000148057 | 0.20606061 | 0.17272727 | 0.20606061 | 0.172727273 |             | 0.0988372 |           |
| ENSG00000163082 |            | 0.16666667 |            | 0.166666667 |             |           |           |
| ENSG00000184445 | 0.16467066 | 0.24848485 | 0.16467066 | 0.248484848 |             |           | 0.494186  |
| ENSG00000102904 | 0.25748503 |            | 0.25748503 |             |             |           |           |
| ENSG00000171016 |            | 0.40555556 |            | 0.405555556 |             |           | 0.4767442 |
| ENSG00000142675 |            | 0.11818182 |            | 0.118181818 |             |           | 0.1802326 |
| ENSG00000172738 |            | 0.44848485 |            | 0.448484848 |             |           | 0.0988372 |
| ENSG00000154001 | 0.34090909 | 0.1        | 0.34090909 | 0.1         | 0.277777778 | 0.3068182 | 0.4431818 |
| ENSG00000130544 |            | 0.38181818 |            | 0.381818182 |             |           | 0.4767442 |
| ENSG00000151067 |            | 0.26993865 |            | 0.26993865  |             |           | 0.5       |
| ENSG00000100632 | 0.25842697 |            | 0.25842697 |             |             |           |           |
| ENSG00000083093 | 0.15168539 |            | 0.15168539 |             |             |           |           |
| ENSG00000183801 |            | 0.5        |            | 0.5         |             |           | 0.2616279 |
| ENSG00000151365 |            | 0.11111111 |            | 0.111111111 |             |           | 0.375     |
| ENSG00000112877 |            | 0.23333333 |            | 0.233333333 |             |           | 0.3662791 |
| ENSG00000086544 |            | 0.47777778 |            | 0.477777778 |             |           | 0.4090909 |
| ENSG00000143147 | 0.31437126 |            | 0.31437126 |             | 0.19047619  | 0.1802326 |           |
| ENSG00000143171 |            | 0.15882353 |            | 0.158823529 |             |           | 0.0666667 |
| ENSG00000024526 |            | 0.14444444 |            | 0.144444444 |             |           | 0.0813953 |
| ENSG00000144040 |            | 0.24242424 |            | 0.242424242 |             |           | 0.4011628 |
| ENSG00000155754 |            | 0.33939394 |            | 0.339393939 |             |           |           |
| ENSG00000160999 |            |            |            |             | 0.219512195 | 0.3846154 |           |
| ENSG00000113396 | 0.36526946 | 0.29310345 | 0.36526946 | 0.293103448 | 0.101190476 | 0.0952381 |           |
| ENSG00000189334 |            | 0.48787879 |            | 0.487878788 |             |           | 0.3546512 |
| ENSG00000166206 | 0.25       | 0.3        | 0.25       | 0.3         | 0.26744186  | 0.1888889 | 0.2613636 |
| ENSG00000146476 | 0.09281437 |            | 0.09281437 |             | 0.267857143 | 0.3372093 |           |
| ENSG00000133460 |            | 0.48148148 |            | 0.481481481 |             |           | 0.4411765 |
| ENSG00000214253 |            |            |            |             | 0.321428571 | 0.4418605 |           |
| ENSG00000179626 | 0.43413174 |            | 0.43413174 |             | 0.119047619 | 0.0755814 |           |
| ENSG00000180549 | 0.23888889 | 0.39393939 | 0.23888889 | 0.393939394 | 0.177777778 | 0.2613636 | 0.2151163 |
| ENSG00000038427 |            | 0.49358974 |            | 0.493589744 |             |           | 0.4264706 |
| ENSG00000143258 |            | 0.12727273 |            | 0.127272727 |             |           |           |
| ENSG00000139514 |            | 0.1993865  |            | 0.199386503 |             |           | 0.372093  |
| ENSG00000165862 |            | 0.48787879 |            | 0.487878788 |             |           | 0.2383721 |
| ENSG00000146757 |            | 0.13939394 |            | 0.139393939 |             |           | 0.2906977 |
| ENSG00000198105 |            | 0.14444444 |            | 0.144444444 |             |           | 0.1111111 |
| ENSG00000108826 | 0.36666667 | 0.45348837 | 0.36666667 | 0.453488372 |             |           | 0.1022727 |
| ENSG00000164151 |            |            |            |             |             |           | 0.2045455 |
| ENSG00000123575 |            | 0.33229814 |            | 0.332298137 |             |           | 0.4705882 |
| ENSG00000107819 | 0.20359281 |            | 0.20359281 |             | 0.238095238 | 0.2325581 |           |
| ENSG00000111554 | 0.15868263 | 0.29393939 | 0.15868263 | 0.293939394 | 0.410714286 | 0.3837209 | 0.3837209 |
| ENSG00000206344 |            | 0.4        |            | 0.4         |             |           | 0.4883721 |
| ENSG00000089472 | 0.41017964 |            | 0.41017964 |             |             |           |           |
| ENSG00000243232 |            | 0.05151515 |            | 0.051515152 |             |           | 0.1162791 |
| ENSG00000153093 |            | 0.47560976 |            | 0.475609756 |             |           | 0.494186  |



|                 |            |            |            |             |             |           |           |
|-----------------|------------|------------|------------|-------------|-------------|-----------|-----------|
| ENSG00000182903 |            | 0.37575758 |            | 0.375757576 |             |           | 0.2882353 |
| ENSG00000114735 | 0.05688623 | 0.16463415 | 0.05688623 | 0.164634146 | 0.339285714 | 0.2732558 | 0.3546512 |
| ENSG00000124641 | 0.4375     | 0.33888889 | 0.4375     | 0.338888889 | 0.5         | 0.3295455 | 0.2840909 |
| ENSG00000128739 | 0.44311377 |            | 0.44311377 |             | 0.458333333 | 0.4651163 |           |
| ENSG00000140107 | 0.47005988 | 0.2183908  | 0.47005988 | 0.218390805 | 0.196428571 | 0.2965116 | 0.1590909 |
| ENSG00000142945 | 0.39221557 |            | 0.39221557 |             | 0.279761905 | 0.25      |           |
| ENSG00000115364 |            | 0.45505618 |            | 0.45505618  |             |           | 0.3295455 |
| ENSG00000109189 |            | 0.16666667 |            | 0.166666667 |             |           | 0.0909091 |
| ENSG00000154723 |            | 0.16860465 |            | 0.168604651 |             |           | 0.2840909 |
| ENSG00000137941 |            | 0.28220859 |            | 0.282208589 |             |           | 0.0714286 |
| ENSG00000109046 |            | 0.36196319 |            | 0.36196319  |             |           | 0.1705882 |
| ENSG00000150656 |            | 0.37272727 |            | 0.372727273 |             |           | 0.3488372 |
| ENSG00000169032 |            | 0.10555556 |            | 0.105555556 |             |           |           |
| ENSG00000059145 |            | 0.39939024 |            | 0.399390244 |             |           | 0.2151163 |
| ENSG00000137265 |            | 0.49090909 |            | 0.490909091 |             |           | 0.4883721 |
| ENSG00000100034 | 0.36363636 | 0.10122699 | 0.36363636 | 0.101226994 | 0.255555556 | 0.25      | 0.3139535 |
| ENSG00000196182 |            | 0.21515152 |            | 0.215151515 |             |           | 0.1337209 |
| ENSG00000183207 | 0.10778443 |            | 0.10778443 |             | 0.095238095 |           |           |
| ENSG00000100982 |            | 0.16969697 |            | 0.16969697  |             |           |           |
| ENSG00000186615 | 0.05688623 |            | 0.05688623 |             |             |           |           |
| ENSG00000115758 | 0.22754491 |            | 0.22754491 |             | 0.404761905 | 0.4767442 |           |
| ENSG00000110435 | 0.46107784 | 0.23030303 | 0.46107784 | 0.23030303  | 0.255952381 | 0.3197674 | 0.3081395 |
| ENSG00000163288 |            | 0.26666667 |            | 0.266666667 |             |           | 0.1506024 |
| ENSG00000001631 |            | 0.09090909 |            | 0.090909091 |             |           | 0.3       |
| ENSG00000136802 |            | 0.25454545 |            | 0.254545455 |             |           | 0.3488372 |
| ENSG00000136940 |            | 0.23312883 |            | 0.233128834 |             |           | 0.3823529 |
| ENSG00000182197 |            | 0.45294118 |            | 0.452941176 |             |           | 0.4634146 |
| ENSG00000120907 | 0.46686747 | 0.38484848 | 0.46686747 | 0.384848485 | 0.464285714 | 0.4186047 | 0.4767442 |
| ENSG00000138641 | 0.08888889 | 0.29393939 | 0.08888889 | 0.293939394 | 0.333333333 | 0.3313953 | 0.3837209 |
| ENSG00000131746 |            | 0.14444444 |            | 0.144444444 |             |           |           |
| ENSG00000105479 |            | 0.35454545 |            | 0.354545455 |             |           | 0.4011628 |
| ENSG00000179172 |            |            |            |             | 0.161764706 | 0.1282051 |           |
| ENSG00000111727 |            | 0.05769231 |            | 0.057692308 |             |           | 0.2727273 |
| ENSG00000198822 |            |            |            |             |             | 0.0581395 |           |
| ENSG00000135250 |            | 0.21428571 |            | 0.214285714 |             |           | 0.3081395 |
| ENSG00000146828 |            | 0.48787879 |            | 0.487878788 |             |           | 0.2       |
| ENSG00000100368 |            | 0.14848485 |            | 0.148484848 |             |           | 0.1395349 |
| ENSG00000110245 |            | 0.08181818 |            | 0.081818182 |             |           | 0.3823529 |
| ENSG00000196646 | 0.09444444 |            | 0.09444444 |             |             |           |           |
| ENSG00000122729 |            | 0.38271605 |            | 0.382716049 |             |           | 0.3604651 |
| ENSG00000169018 |            | 0.31212121 |            | 0.312121212 |             |           |           |
| ENSG00000152332 |            | 0.44318182 |            | 0.443181818 |             |           | 0.4882353 |
| ENSG00000166342 | 0.20958084 | 0.40243902 | 0.20958084 | 0.402439024 | 0.071428571 |           | 0.3313953 |
| ENSG00000062370 | 0.05617978 | 0.46969697 | 0.05617978 | 0.46969697  |             | 0.0666667 | 0.4360465 |
| ENSG00000163394 | 0.1686747  |            | 0.1686747  |             | 0.136904762 | 0.1860465 |           |
| ENSG00000220032 | 0.08333333 | 0.28787879 | 0.08333333 | 0.287878788 | 0.172619048 | 0.202381  | 0.2674419 |
| ENSG00000160310 | 0.48802395 | 0.49438202 | 0.48802395 | 0.494382022 | 0.377777778 | 0.3863636 | 0.4512195 |
| ENSG00000129244 |            | 0.43636364 |            | 0.436363636 | 0.382716049 | 0.4207317 | 0.4431818 |
| ENSG00000101596 |            | 0.43333333 |            | 0.433333333 |             |           | 0.3392857 |
| ENSG00000198812 |            | 0.32121212 |            | 0.321212121 |             |           | 0.4883721 |
| ENSG00000136271 |            | 0.45151515 |            | 0.451515152 |             |           | 0.372093  |
| ENSG00000171476 | 0.30555556 |            | 0.30555556 |             | 0.411111111 | 0.3953488 |           |
| ENSG00000080644 | 0.33532934 | 0.36280488 | 0.33532934 | 0.362804878 | 0.297619048 | 0.3604651 | 0.1627907 |
| ENSG00000197016 | 0.16766467 | 0.3445122  | 0.16766467 | 0.344512195 | 0.36746988  | 0.3837209 | 0.3488372 |

|                 |            |            |            |             |             |           |           |
|-----------------|------------|------------|------------|-------------|-------------|-----------|-----------|
| ENSG00000113504 |            | 0.47878788 |            | 0.478787879 |             |           | 0.494186  |
| ENSG00000129646 |            | 0.28787879 |            | 0.287878788 |             |           | 0.3255814 |
| ENSG00000185924 |            | 0.28658537 |            | 0.286585366 |             |           | 0.4418605 |
| ENSG00000204305 | 0.1402439  |            | 0.1402439  |             | 0.238095238 | 0.127907  |           |
| ENSG00000204406 |            | 0.27878788 |            | 0.278787879 |             |           | 0.2674419 |
| ENSG00000136231 |            | 0.4        |            | 0.4         |             |           | 0.3409091 |
| ENSG00000089101 | 0.39939024 | 0.48787879 | 0.39939024 | 0.487878788 | 0.295454545 | 0.4698795 | 0.4651163 |
| ENSG00000154646 |            | 0.20858896 |            | 0.208588957 |             |           |           |
| ENSG00000169764 | 0.14071856 |            | 0.14071856 |             | 0.119047619 |           |           |
| ENSG00000129465 | 0.17964072 | 0.05792683 | 0.17964072 | 0.057926829 | 0.333333333 | 0.2209302 | 0.077381  |
| ENSG00000198331 | 0.19642857 | 0.31212121 | 0.19642857 | 0.312121212 |             |           | 0.2151163 |
| ENSG00000135018 |            | 0.35       |            | 0.35        |             |           | 0.0568182 |
| ENSG00000124787 |            | 0.31818182 |            | 0.318181818 |             |           | 0.2297297 |
| ENSG00000163710 |            | 0.24705882 |            | 0.247058824 |             |           | 0.3294118 |
| ENSG00000146038 |            | 0.24117647 |            | 0.241176471 |             |           | 0.4883721 |
| ENSG00000142252 |            | 0.3445122  |            | 0.344512195 |             |           | 0.1104651 |
| ENSG00000016602 | 0.14285714 | 0.11212121 | 0.14285714 | 0.112121212 |             |           | 0.060241  |
| ENSG00000108651 | 0.40555556 | 0.1954023  | 0.40555556 | 0.195402299 | 0.147727273 | 0.1477273 | 0.1511628 |
| ENSG00000175782 |            | 0.23809524 |            | 0.238095238 |             |           |           |
| ENSG00000186790 |            | 0.10248447 |            | 0.102484472 |             |           | 0.3197674 |
| ENSG00000164879 | 0.22155689 | 0.45151515 | 0.22155689 | 0.451515152 | 0.482142857 | 0.4411765 | 0.4431818 |
| ENSG00000176879 |            |            |            | 0.196428571 |             | 0.2267442 |           |
| ENSG00000116039 | 0.34131737 | 0.43939394 | 0.34131737 | 0.439393939 | 0.482142857 | 0.4593023 | 0.3430233 |
| ENSG00000166762 |            | 0.22222222 |            | 0.222222222 |             |           | 0.2738095 |
| ENSG00000086712 |            | 0.4030303  |            | 0.403030303 |             |           | 0.3823529 |
| ENSG00000169860 |            |            |            |             |             |           | 0.0755814 |
| ENSG00000164938 |            | 0.27575758 |            | 0.275757576 |             |           | 0.244186  |
| ENSG00000181856 | 0.21910112 | 0.35454545 | 0.21910112 | 0.354545455 | 0.397435897 | 0.3111111 | 0.3139535 |
| ENSG00000064545 | 0.11419753 | 0.15151515 | 0.11419753 | 0.151515152 |             |           |           |
| ENSG00000183722 |            |            |            |             |             |           | 0.2325581 |
| ENSG00000066739 |            | 0.44785276 |            | 0.447852761 |             |           | 0.4883721 |
| ENSG00000170322 |            | 0.28787879 |            | 0.287878788 |             |           | 0.3977273 |
| ENSG00000180861 | 0.19461078 | 0.37037037 | 0.19461078 | 0.37037037  | 0.343373494 | 0.3313953 | 0.3372093 |
| ENSG00000157193 | 0.19161677 | 0.45757576 | 0.19161677 | 0.457575758 | 0.464285714 | 0.5       | 0.4767442 |
| ENSG00000070018 |            | 0.18787879 |            | 0.187878788 |             |           | 0.0813953 |
| ENSG00000130717 |            | 0.08484848 |            | 0.084848485 |             |           | 0.0952381 |
| ENSG00000198914 |            | 0.40909091 |            | 0.409090909 |             |           | 0.3604651 |
| ENSG00000167283 |            | 0.07926829 |            | 0.079268293 |             |           | 0.0813953 |
| ENSG00000171483 | 0.3125     |            | 0.3125     |             | 0.114457831 |           |           |
| ENSG00000175224 |            | 0.23780488 |            | 0.237804878 |             |           | 0.3977273 |
| ENSG00000172469 | 0.42696629 | 0.42424242 | 0.42696629 | 0.424242424 | 0.375       | 0.4127907 | 0.2771084 |
| ENSG00000104904 |            |            |            |             |             |           | 0.0639535 |
| ENSG00000148200 |            | 0.07222222 |            | 0.072222222 |             |           | 0.0639535 |
| ENSG00000102924 |            | 0.22121212 |            | 0.221212121 |             |           |           |
| ENSG00000227450 |            | 0.25465839 |            | 0.254658385 |             |           | 0.4470588 |
| ENSG00000066044 |            | 0.31515152 |            | 0.315151515 |             |           | 0.4883721 |
| ENSG00000213132 | 0.45092025 | 0.46060606 | 0.45092025 | 0.460606061 | 0.162650602 | 0.1294118 | 0.4207317 |
| ENSG00000087495 |            |            |            |             | 0.05952381  | 0.0529412 |           |
| ENSG00000177666 |            | 0.40606061 |            | 0.406060606 |             |           | 0.3662791 |
| ENSG00000196758 |            | 0.49085366 |            | 0.490853659 |             |           | 0.4647059 |
| ENSG00000109881 |            | 0.3        |            | 0.3         |             |           | 0.494186  |
| ENSG00000159128 | 0.21257485 | 0.4969697  | 0.21257485 | 0.496969697 | 0.422619048 | 0.4767442 | 0.4767442 |
| ENSG00000132031 |            | 0.3908046  |            | 0.390804598 |             |           | 0.202381  |
| ENSG00000187922 |            | 0.14545455 |            | 0.145454545 |             |           | 0.2093023 |

|                 |            |            |            |             |             |           |           |
|-----------------|------------|------------|------------|-------------|-------------|-----------|-----------|
| ENSG00000153823 |            | 0.48181818 |            | 0.481818182 |             |           | 0.4883721 |
| ENSG00000113749 | 0.34131737 |            | 0.34131737 |             | 0.244444444 | 0.122093  | 0.1058824 |
| ENSG00000188487 |            | 0.42987805 |            | 0.429878049 |             |           | 0.1927711 |
| ENSG00000160439 | 0.22754491 | 0.27950311 | 0.22754491 | 0.279503106 |             |           | 0.2616279 |
| ENSG00000254833 |            |            |            |             | 0.06547619  | 0.0755814 |           |
| ENSG00000196844 |            | 0.46625767 |            | 0.466257669 |             |           | 0.4011628 |
| ENSG0000023445  |            | 0.3988764  |            | 0.398876404 |             |           | 0.3888889 |
| ENSG00000184939 |            | 0.21212121 |            | 0.212121212 |             |           | 0.1590909 |
| ENSG00000139826 |            | 0.17222222 |            | 0.172222222 |             |           | 0.1363636 |
| ENSG00000184224 | 0.20658683 | 0.41212121 | 0.20658683 | 0.412121212 |             |           | 0.1162791 |
| ENSG00000134597 | 0.17065868 |            | 0.17065868 |             |             |           |           |
| ENSG00000185888 |            |            |            |             |             |           | 0.0681818 |
| ENSG00000185069 |            | 0.47777778 |            | 0.477777778 |             |           | 0.3977273 |
| ENSG00000198081 |            | 0.43939394 |            | 0.439393939 |             |           | 0.1647059 |
| ENSG00000130948 |            |            |            |             | 0.208333333 | 0.244186  |           |
| ENSG00000064933 | 0.26136364 |            | 0.26136364 |             | 0.177777778 | 0.2159091 |           |
| ENSG00000114251 |            | 0.46363636 |            | 0.463636364 |             |           | 0.2965116 |
| ENSG00000100647 |            | 0.1030303  |            | 0.103030303 |             |           | 0.1666667 |
| ENSG00000121053 | 0.38023952 |            | 0.38023952 |             | 0.351190476 | 0.2906977 |           |
| ENSG00000196549 | 0.36227545 | 0.39393939 | 0.36227545 | 0.393939394 | 0.220238095 | 0.2209302 | 0.4880952 |
| ENSG00000126562 | 0.24545455 |            | 0.24545455 |             |             |           |           |
| ENSG00000159692 | 0.46686747 | 0.43939394 | 0.46686747 | 0.439393939 | 0.226190476 | 0.4069767 | 0.4404762 |
| ENSG00000215504 | 0.27409639 |            | 0.27409639 |             | 0.071428571 | 0.1453488 |           |
| ENSG00000107736 |            | 0.28484848 |            | 0.284848485 |             |           | 0.3777778 |
| ENSG00000139725 |            | 0.16111111 |            | 0.161111111 |             |           | 0.3222222 |
| ENSG00000204979 | 0.0988024  | 0.33783784 | 0.0988024  | 0.337837838 |             |           | 0.2179487 |
| ENSG00000143878 |            | 0.47878788 |            | 0.478787879 |             |           | 0.1976744 |
| ENSG00000141639 | 0.43373494 |            | 0.43373494 |             | 0.25        | 0.2151163 |           |
| ENSG00000198183 |            | 0.23636364 |            | 0.236363636 |             |           | 0.1352941 |
| ENSG00000133636 |            |            |            |             |             |           | 0.2470588 |
| ENSG00000148677 | 0.41463415 | 0.45454545 | 0.41463415 | 0.454545455 | 0.365853659 | 0.4       | 0.3197674 |
| ENSG00000160190 |            | 0.45402299 |            | 0.454022989 | 0.136904762 | 0.1860465 | 0.25      |
| ENSG00000181467 |            | 0.46036585 |            | 0.460365854 |             |           | 0.3023256 |
| ENSG00000198162 | 0.06586826 | 0.44025157 | 0.06586826 | 0.440251572 | 0.463855422 | 0.3882353 | 0.4534884 |
| ENSG00000134255 | 0.22754491 |            | 0.22754491 |             | 0.154761905 | 0.1976744 |           |
| ENSG00000076351 |            | 0.45757576 |            | 0.457575758 |             |           | 0.2888889 |
| ENSG00000095564 |            | 0.36890244 |            | 0.368902439 |             |           | 0.1918605 |
| ENSG00000185760 |            | 0.36309524 |            | 0.363095238 |             |           | 0.3430233 |
| ENSG00000116017 |            | 0.26363636 |            | 0.263636364 |             |           | 0.4360465 |
| ENSG00000176658 | 0.11515152 | 0.45882353 | 0.11515152 | 0.458823529 |             |           | 0.1470588 |
| ENSG00000089177 | 0.10060976 | 0.47575758 | 0.10060976 | 0.475757576 | 0.30952381  | 0.3081395 | 0.4216867 |
| ENSG00000130222 |            |            |            |             |             | 0.0921053 |           |
| ENSG00000122035 | 0.30838323 |            | 0.30838323 |             | 0.463855422 | 0.4058824 |           |
| ENSG00000168754 | 0.38323353 |            | 0.38323353 |             | 0.337349398 | 0.2588235 |           |
| ENSG00000105877 |            | 0.34662577 |            | 0.346625767 |             |           | 0.1162791 |
| ENSG00000115705 | 0.41463415 | 0.42073171 | 0.41463415 | 0.420731707 | 0.337349398 | 0.372093  | 0.494186  |
| ENSG00000100664 | 0.36526946 | 0.26060606 | 0.36526946 | 0.260606061 | 0.291666667 | 0.3953488 | 0.3176471 |
| ENSG00000162814 |            | 0.33333333 |            | 0.333333333 |             |           | 0.1111111 |
| ENSG00000171551 |            | 0.2        |            | 0.2         |             |           | 0.4404762 |
| ENSG00000099917 |            |            |            |             |             |           | 0.3953488 |
| ENSG00000122026 | 0.3        |            | 0.3        |             | 0.055555556 | 0.0639535 |           |
| ENSG00000181982 |            | 0.46363636 |            | 0.463636364 |             |           | 0.4767442 |
| ENSG00000212899 |            | 0.38484848 |            | 0.384848485 |             |           | 0.4883721 |
| ENSG00000135048 | 0.34131737 | 0.46666667 | 0.34131737 | 0.466666667 | 0.107142857 | 0.0813953 | 0.4058824 |



|                 |            |            |            |             |             |           |           |
|-----------------|------------|------------|------------|-------------|-------------|-----------|-----------|
| ENSG00000196678 |            | 0.06969697 |            | 0.06969697  |             |           | 0.1569767 |
| ENSG00000174032 | 0.21856287 | 0.44444444 | 0.21856287 | 0.44444444  | 0.148809524 | 0.1395349 | 0.2386364 |
| ENSG00000103021 |            | 0.41463415 |            | 0.414634146 |             |           | 0.4302326 |
| ENSG00000175175 |            | 0.40229885 |            | 0.402298851 |             |           | 0.25      |
| ENSG00000060688 |            | 0.16257669 |            | 0.162576687 |             |           | 0.1686747 |
| ENSG00000163235 |            | 0.41823899 |            | 0.418238994 |             |           | 0.3444444 |
| ENSG00000226137 |            | 0.31818182 |            | 0.318181818 |             |           | 0.1860465 |
| ENSG00000174600 |            | 0.47272727 |            | 0.472727273 |             |           | 0.3546512 |
| ENSG00000113141 |            | 0.14444444 |            | 0.144444444 |             |           |           |
| ENSG00000108448 | 0.31927711 |            | 0.31927711 |             | 0.452380952 | 0.4883721 |           |
| ENSG00000127325 | 0.27777778 | 0.39090909 | 0.27777778 | 0.390909091 | 0.266666667 | 0.1627907 | 0.4011628 |
| ENSG00000118263 | 0.35       | 0.36363636 | 0.35       | 0.363636364 | 0.111111111 | 0.0581395 | 0.1777778 |
| ENSG00000003096 | 0.43975904 |            | 0.43975904 |             |             |           |           |
| ENSG00000067208 |            | 0.34662577 |            | 0.346625767 |             |           | 0.0755814 |
| ENSG00000140836 |            |            |            |             |             |           | 0.25      |
| ENSG00000106624 |            | 0.4695122  |            | 0.469512195 |             |           | 0.2965116 |
| ENSG00000178974 |            | 0.40449438 |            | 0.404494382 |             |           | 0.3777778 |
| ENSG00000169474 |            | 0.46969697 |            | 0.46969697  |             |           | 0.372093  |
| ENSG00000072501 |            |            |            |             | 0.422619048 | 0.4117647 |           |
| ENSG00000118762 |            | 0.3969697  |            | 0.396969697 |             |           | 0.4186047 |
| ENSG00000167526 |            | 0.11212121 |            | 0.112121212 |             |           | 0.0823529 |
| ENSG00000107443 |            | 0.3125     |            | 0.3125      |             |           | 0.4390244 |
| ENSG00000094916 | 0.17065868 | 0.43258427 | 0.17065868 | 0.43258427  | 0.470238095 | 0.4418605 | 0.4069767 |
| ENSG00000088280 | 0.13772455 | 0.13109756 | 0.13772455 | 0.131097561 |             |           | 0.0697674 |
| ENSG00000116898 | 0.09580838 | 0.26363636 | 0.09580838 | 0.263636364 | 0.31547619  | 0.244186  | 0.3139535 |
| ENSG00000167159 | 0.09580838 |            | 0.09580838 |             |             |           |           |
| ENSG00000156017 |            | 0.36666667 |            | 0.366666667 |             |           | 0.1511628 |
| ENSG00000196358 |            | 0.41666667 |            | 0.416666667 |             |           | 0.4659091 |
| ENSG00000177302 | 0.30113636 | 0.2        | 0.30113636 | 0.2         | 0.090909091 |           | 0.2386364 |
| ENSG00000155980 |            | 0.38181818 |            | 0.381818182 |             |           | 0.4204545 |
| ENSG00000105976 |            | 0.45757576 |            | 0.457575758 |             |           | 0.4418605 |
| ENSG00000126838 |            | 0.3969697  |            | 0.396969697 |             |           | 0.4883721 |
| ENSG00000065135 | 0.14371257 | 0.47878788 | 0.14371257 | 0.478787879 | 0.289156627 | 0.3647059 | 0.3666667 |
| ENSG00000082213 |            | 0.39090909 |            | 0.390909091 | 0.211111111 | 0.2727273 | 0.2848837 |
| ENSG00000185869 |            | 0.41666667 |            | 0.416666667 |             |           |           |
| ENSG00000254521 |            |            |            |             |             |           | 0.1071429 |
| ENSG00000105609 |            | 0.3006135  |            | 0.300613497 |             |           | 0.127907  |
| ENSG00000145425 |            | 0.07878788 |            | 0.078787879 | 0.220238095 | 0.1511628 | 0.1860465 |
| ENSG00000113732 |            | 0.13939394 |            | 0.139393939 |             |           | 0.0639535 |
| ENSG00000164211 | 0.16666667 | 0.24719101 | 0.16666667 | 0.247191011 | 0.139534884 | 0.1       | 0.2840909 |
| ENSG00000165025 |            | 0.38181818 |            | 0.381818182 |             |           | 0.4709302 |
| ENSG00000131389 | 0.07471264 | 0.43292683 | 0.07471264 | 0.432926829 | 0.411111111 | 0.4666667 | 0.494186  |
| ENSG00000221995 | 0.11377246 |            | 0.11377246 |             | 0.095238095 | 0.127907  |           |
| ENSG00000170871 |            | 0.39444444 |            | 0.394444444 |             |           | 0.4418605 |
| ENSG00000124120 |            | 0.48773006 |            | 0.487730061 |             |           | 0.0581395 |
| ENSG00000246705 |            | 0.43888889 |            | 0.438888889 |             |           | 0.2840909 |
| ENSG00000120457 | 0.09281437 | 0.27011494 | 0.09281437 | 0.270114943 | 0.410714286 | 0.4651163 | 0.2714286 |
| ENSG00000220575 |            | 0.33939394 |            | 0.339393939 |             |           | 0.4360465 |
| ENSG00000144381 |            | 0.30555556 |            | 0.305555556 |             |           | 0.4186047 |
| ENSG00000165533 |            | 0.24431818 |            | 0.244318182 |             |           | 0.2444444 |
| ENSG00000173276 | 0.29640719 | 0.31818182 | 0.29640719 | 0.318181818 |             | 0.0755814 | 0.3662791 |
| ENSG00000104679 | 0.35628743 | 0.4        | 0.35628743 | 0.4         | 0.136904762 | 0.2616279 | 0.2588235 |
| ENSG00000179873 | 0.48493976 |            | 0.48493976 |             | 0.5         | 0.4883721 |           |
| ENSG00000178928 |            | 0.46590909 |            | 0.465909091 |             |           | 0.2790698 |



|                 |            |            |            |             |             |           |           |
|-----------------|------------|------------|------------|-------------|-------------|-----------|-----------|
| ENSG00000134987 |            | 0.30792683 |            | 0.307926829 |             |           | 0.1333333 |
| ENSG0000088325  | 0.06287425 |            | 0.06287425 |             |             |           |           |
| ENSG00000254556 | 0.3742515  | 0.35670732 | 0.3742515  | 0.356707317 |             |           |           |
| ENSG0000054654  | 0.45783133 | 0.4        | 0.45783133 | 0.4         | 0.327380952 | 0.372093  | 0.4011628 |
| ENSG00000141564 | 0.41916168 | 0.44242424 | 0.41916168 | 0.442424242 | 0.30952381  | 0.2848837 | 0.4825581 |
| ENSG00000173267 | 0.4845679  | 0.08235294 | 0.4845679  | 0.082352941 | 0.345238095 |           | 0.3353659 |
| ENSG00000115718 | 0.35057471 |            | 0.35057471 |             | 0.2         |           | 0.1590909 |
| ENSG00000137563 | 0.14444444 | 0.10909091 | 0.14444444 | 0.109090909 | 0.222222222 | 0.3604651 | 0.0988372 |
| ENSG00000180287 | 0.38484848 | 0.34242424 | 0.38484848 | 0.342424242 | 0.13253012  | 0.125     |           |
| ENSG00000205795 |            | 0.2030303  |            | 0.203030303 |             |           | 0.2012195 |
| ENSG00000125454 | 0.30838323 | 0.32777778 | 0.30838323 | 0.327777778 |             |           | 0.0681818 |
| ENSG00000120160 |            | 0.45555556 |            | 0.455555556 |             |           | 0.4318182 |
| ENSG00000143198 | 0.14071856 | 0.42727273 | 0.14071856 | 0.427272727 | 0.220238095 | 0.1802326 | 0.1453488 |
| ENSG00000109944 | 0.07228916 | 0.43030303 | 0.07228916 | 0.43030303  | 0.076923077 | 0.1282051 | 0.2965116 |
| ENSG00000162989 |            | 0.37654321 |            | 0.37654321  |             |           |           |
| ENSG00000213023 | 0.15       |            | 0.15       |             | 0.089285714 | 0.1046512 |           |
| ENSG00000206532 | 0.08682635 |            | 0.08682635 |             |             |           |           |
| ENSG00000141447 |            | 0.44817073 |            | 0.448170732 |             |           | 0.3863636 |
| ENSG0000035115  | 0.15662651 | 0.3875     | 0.15662651 | 0.3875      | 0.446428571 | 0.4476744 | 0.4011628 |
| ENSG00000204472 |            |            |            |             | 0.470238095 | 0.4476744 |           |
| ENSG00000197713 |            | 0.35276074 |            | 0.352760736 |             |           | 0.2378049 |
| ENSG00000160233 |            | 0.22121212 |            | 0.221212121 |             |           | 0.2732558 |
| ENSG00000143842 |            | 0.10606061 |            | 0.106060606 | 0.166666667 | 0.3809524 | 0.3372093 |
| ENSG00000119927 |            | 0.43506494 |            | 0.435064935 |             |           | 0.4404762 |
| ENSG00000118193 | 0.09659091 | 0.47878788 | 0.09659091 | 0.478787879 | 0.222222222 | 0.2727273 | 0.4047619 |
| ENSG00000157895 | 0.47058824 | 0.38181818 | 0.47058824 | 0.381818182 | 0.122222222 | 0.0795455 | 0.3546512 |
| ENSG00000183763 |            | 0.46629213 |            | 0.466292135 |             |           | 0.1744186 |
| ENSG00000164889 | 0.3742515  |            | 0.3742515  |             | 0.297619048 | 0.2848837 |           |
| ENSG00000170498 | 0.17168675 |            | 0.17168675 |             |             |           |           |
| ENSG00000219626 |            | 0.37272727 |            | 0.372727273 |             |           | 0.1744186 |
| ENSG00000175324 | 0.15555556 |            | 0.15555556 |             | 0.333333333 | 0.3409091 |           |
| ENSG00000100154 |            | 0.1        |            | 0.1         |             |           | 0.3977273 |
| ENSG00000173273 |            | 0.22699387 |            | 0.226993865 |             |           | 0.3888889 |
| ENSG00000255953 | 0.28333333 | 0.21428571 | 0.28333333 | 0.214285714 | 0.155555556 | 0.1363636 | 0.1527778 |
| ENSG00000133195 |            | 0.48466258 |            | 0.484662577 |             |           | 0.3313953 |
| ENSG00000103512 |            | 0.12269939 |            | 0.122699387 |             |           | 0.1627907 |
| ENSG00000172613 |            | 0.07575758 |            | 0.075757576 |             |           | 0.2034884 |
| ENSG00000139910 | 0.31137725 | 0.2375     | 0.31137725 | 0.2375      |             |           | 0.3333333 |
| ENSG00000113645 |            | 0.15454545 |            | 0.154545455 |             |           | 0.2559524 |
| ENSG00000073464 |            | 0.35670732 |            | 0.356707317 |             |           | 0.4360465 |
| ENSG00000196562 | 0.25316456 | 0.13109756 | 0.25316456 | 0.131097561 | 0.290697674 | 0.2625    |           |
| ENSG00000205560 | 0.42222222 | 0.12424242 | 0.42222222 | 0.124242424 | 0.404761905 | 0.3488372 | 0.4204545 |
| ENSG00000165916 | 0.42045455 |            | 0.42045455 |             | 0.409090909 | 0.3068182 |           |
| ENSG00000188582 |            | 0.1969697  |            | 0.196969697 |             |           | 0.2209302 |
| ENSG00000143515 |            | 0.16666667 |            | 0.166666667 |             |           | 0.1744186 |
| ENSG00000070404 |            | 0.21515152 |            | 0.215151515 |             |           | 0.4294118 |
| ENSG00000179021 | 0.44610778 | 0.16363636 | 0.44610778 | 0.163636364 | 0.172619048 | 0.0714286 | 0.0813953 |
| ENSG00000099974 |            | 0.2969697  |            | 0.296969697 |             |           | 0.3604651 |
| ENSG00000113966 |            | 0.10555556 |            | 0.105555556 |             |           |           |
| ENSG00000006125 |            | 0.25454545 |            | 0.254545455 |             |           | 0.4404762 |
| ENSG00000108312 |            | 0.25304878 |            | 0.25304878  |             |           | 0.4069767 |
| ENSG00000109062 |            | 0.43939394 |            | 0.439393939 |             |           | 0.2209302 |
| ENSG00000118855 |            | 0.35151515 |            | 0.351515152 |             |           | 0.3546512 |
| ENSG00000128266 | 0.15068493 | 0.36969697 | 0.15068493 | 0.36969697  |             |           | 0.3392857 |

|                 |            |            |            |             |             |           |           |
|-----------------|------------|------------|------------|-------------|-------------|-----------|-----------|
| ENSG00000125445 | 0.22839506 | 0.07317073 | 0.22839506 | 0.073170732 |             |           |           |
| ENSG00000120156 |            | 0.13636364 |            | 0.136363636 |             |           | 0.1511628 |
| ENSG00000164161 |            | 0.49390244 |            | 0.493902439 |             |           | 0.3636364 |
| ENSG00000254585 |            | 0.48787879 |            | 0.487878788 |             |           | 0.1627907 |
| ENSG00000152443 |            | 0.43258427 |            | 0.43258427  |             |           | 0.4418605 |
| ENSG00000107099 | 0.48802395 | 0.43939394 | 0.48802395 | 0.439393939 | 0.375       | 0.3546512 | 0.3546512 |
| ENSG00000104154 |            | 0.29393939 |            | 0.293939394 |             |           | 0.1818182 |
| ENSG0000015592  |            | 0.34848485 |            | 0.348484848 | 0.255952381 | 0.3023256 | 0.4418605 |
| ENSG00000185621 |            | 0.19090909 |            | 0.190909091 |             |           | 0.1162791 |
| ENSG00000103316 | 0.06666667 |            | 0.06666667 |             | 0.115384615 | 0.0657895 |           |
| ENSG00000075711 |            | 0.43209877 |            | 0.432098765 | 0.102272727 |           | 0.3780488 |
| ENSG00000204952 | 0.12777778 |            | 0.12777778 |             |             | 0.0681818 |           |
| ENSG00000116747 | 0.07361963 | 0.4        | 0.07361963 | 0.4         |             |           | 0.4593023 |
| ENSG00000144224 |            | 0.20496894 |            | 0.204968944 |             |           | 0.4940476 |
| ENSG00000166046 | 0.13855422 | 0.46111111 | 0.13855422 | 0.461111111 |             |           | 0.2159091 |
| ENSG00000108264 | 0.21556886 |            | 0.21556886 |             |             |           |           |
| ENSG00000178202 |            | 0.33939394 |            | 0.339393939 |             |           | 0.494186  |
| ENSG00000134243 |            | 0.46666667 |            | 0.466666667 |             |           | 0.3823529 |
| ENSG00000232629 | 0.40361446 | 0.48214286 | 0.40361446 | 0.482142857 | 0.273809524 | 0.3895349 | 0.3294118 |
| ENSG00000134825 |            | 0.11111111 |            | 0.111111111 | 0.321428571 | 0.3023256 |           |
| ENSG00000163629 | 0.33888889 | 0.13636364 | 0.33888889 | 0.136363636 | 0.3         | 0.375     |           |
| ENSG00000088881 |            | 0.33939394 |            | 0.339393939 |             |           | 0.3313953 |
| ENSG00000067064 | 0.19444444 | 0.18670886 | 0.19444444 | 0.186708861 |             |           | 0.2256098 |
| ENSG00000205683 |            | 0.49695122 |            | 0.49695122  |             |           | 0.2727273 |
| ENSG00000225950 |            | 0.48314607 |            | 0.483146067 |             |           | 0.3181818 |
| ENSG00000254774 | 0.2        |            | 0.2        |             |             |           |           |
| ENSG00000025772 |            |            |            |             |             |           | 0.1686047 |
| ENSG00000128567 |            | 0.38888889 |            | 0.388888889 |             |           | 0.4090909 |
| ENSG00000168056 | 0.20481928 |            | 0.20481928 |             | 0.36746988  | 0.3546512 |           |
| ENSG00000167612 |            | 0.27134146 |            | 0.271341463 |             |           | 0.1842105 |
| ENSG00000133641 |            | 0.42777778 |            | 0.427777778 |             |           | 0.4886364 |
| ENSG00000105793 | 0.37724551 | 0.25151515 | 0.37724551 | 0.251515152 | 0.208333333 | 0.2325581 | 0.2386364 |
| ENSG00000197177 | 0.09281437 |            | 0.09281437 |             |             | 0.1       |           |
| ENSG00000154025 | 0.13473054 | 0.2        | 0.13473054 | 0.2         | 0.357142857 | 0.4651163 |           |
| ENSG00000196329 | 0.30538922 | 0.32758621 | 0.30538922 | 0.327586207 |             |           | 0.3430233 |
| ENSG00000115355 | 0.26704545 | 0.43333333 | 0.26704545 | 0.433333333 | 0.2         | 0.1904762 | 0.4176471 |
| ENSG00000163219 | 0.21686747 | 0.46296296 | 0.21686747 | 0.462962963 | 0.44047619  | 0.3837209 | 0.4883721 |
| ENSG00000089682 |            | 0.33939394 |            | 0.339393939 |             |           | 0.4888889 |
| ENSG00000092621 | 0.47005988 |            | 0.47005988 |             | 0.416666667 | 0.4186047 |           |
| ENSG00000161896 | 0.13173653 | 0.47272727 | 0.13173653 | 0.472727273 | 0.136904762 | 0.1744186 | 0.2       |
| ENSG00000117399 | 0.14071856 |            | 0.14071856 |             |             |           |           |
| ENSG00000174132 |            | 0.49393939 |            | 0.493939394 |             |           | 0.127907  |
| ENSG00000087589 | 0.1        | 0.30909091 | 0.1        | 0.309090909 |             |           | 0.0872093 |
| ENSG00000172794 | 0.30555556 | 0.3969697  | 0.30555556 | 0.396969697 | 0.148809524 | 0.1686047 | 0.1395349 |
| ENSG00000117305 |            | 0.08787879 |            | 0.087878788 |             |           | 0.1395349 |
| ENSG00000139174 | 0.1        | 0.42777778 | 0.1        | 0.427777778 | 0.211111111 | 0.1136364 | 0.4111111 |
| ENSG00000171509 | 0.37724551 |            | 0.37724551 |             | 0.083333333 | 0.0872093 |           |
| ENSG00000112290 | 0.40432099 |            | 0.40432099 |             | 0.213414634 |           | 0.2848837 |
| ENSG00000137210 |            | 0.3969697  |            | 0.396969697 | 0.052631579 |           | 0.4302326 |
| ENSG00000211898 |            |            |            |             |             |           | 0.3941176 |
| ENSG00000134202 | 0.13173653 | 0.3988764  | 0.13173653 | 0.398876404 | 0.142857143 | 0.1744186 | 0.2790698 |
| ENSG00000164379 | 0.19461078 |            | 0.19461078 |             | 0.30952381  | 0.3081395 |           |
| ENSG00000100985 | 0.10465116 |            | 0.10465116 |             | 0.073170732 | 0.1666667 |           |
| ENSG00000149575 |            | 0.49390244 |            | 0.493902439 |             |           | 0.255814  |

|                 |            |            |            |             |             |           |           |
|-----------------|------------|------------|------------|-------------|-------------|-----------|-----------|
| ENSG00000239305 | 0.2005988  |            | 0.2005988  |             |             | 0.0639535 |           |
| ENSG00000179331 |            | 0.43333333 |            | 0.43333333  |             |           | 0.2965116 |
| ENSG0000009765  |            | 0.43939394 |            | 0.439393939 |             |           | 0.4777778 |
| ENSG00000181163 |            | 0.36585366 |            | 0.365853659 |             |           | 0.4534884 |
| ENSG00000122140 | 0.37724551 | 0.45705521 | 0.37724551 | 0.457055215 | 0.172619048 | 0.1569767 | 0.127907  |
| ENSG00000119698 | 0.4251497  | 0.15730337 | 0.4251497  | 0.157303371 | 0.404761905 | 0.3488372 | 0.375     |
| ENSG00000197937 | 0.37777778 | 0.23333333 | 0.37777778 | 0.233333333 | 0.188888889 | 0.1477273 |           |
| ENSG00000048649 | 0.39820359 | 0.13888889 | 0.39820359 | 0.138888889 | 0.446428571 | 0.494186  | 0.1802326 |
| ENSG00000141469 | 0.26047904 | 0.49393939 | 0.26047904 | 0.493939394 | 0.463414634 | 0.4302326 | 0.4772727 |
| ENSG00000078018 | 0.05988024 | 0.07575758 | 0.05988024 | 0.075757576 |             |           | 0.2325581 |
| ENSG00000257545 |            | 0.47878788 |            | 0.478787879 |             |           | 0.2383721 |
| ENSG00000064313 | 0.4760479  |            | 0.4760479  |             |             |           |           |
| ENSG00000089250 |            | 0.33841463 |            | 0.338414634 |             |           | 0.452381  |
| ENSG00000089723 |            | 0.38787879 |            | 0.387878788 | 0.1         | 0.0795455 | 0.5       |
| ENSG00000164073 |            |            |            |             |             |           | 0.3255814 |
| ENSG00000116882 | 0.13772455 |            | 0.13772455 |             |             |           |           |
| ENSG00000161956 |            | 0.36060606 |            | 0.360606061 |             |           | 0.2790698 |
| ENSG00000178761 |            | 0.4        |            | 0.4         |             |           | 0.3313953 |
| ENSG00000145348 | 0.11976048 | 0.33636364 | 0.11976048 | 0.336363636 | 0.13253012  | 0.2764706 | 0.2732558 |
| ENSG00000156970 | 0.20454545 | 0.38181818 | 0.20454545 | 0.381818182 | 0.397435897 | 0.4102564 | 0.1918605 |
| ENSG00000198589 |            | 0.4        |            | 0.4         |             |           | 0.4709302 |
| ENSG00000144644 |            | 0.39444444 |            | 0.394444444 |             |           | 0.4761905 |
| ENSG00000106028 | 0.08231707 |            | 0.08231707 |             |             | 0.0882353 |           |
| ENSG00000143786 | 0.06886228 | 0.29393939 | 0.06886228 | 0.293939394 | 0.148809524 | 0.1337209 | 0.0930233 |
| ENSG00000022277 |            | 0.43939394 |            | 0.439393939 |             |           | 0.3095238 |
| ENSG00000138821 |            | 0.48484848 |            | 0.484848485 |             |           | 0.5       |
| ENSG00000113269 |            | 0.37575758 |            | 0.375757576 |             |           | 0.2034884 |
| ENSG00000165832 | 0.48295455 | 0.40243902 | 0.48295455 | 0.402439024 |             |           |           |
| ENSG00000036448 | 0.41573034 | 0.28658537 | 0.41573034 | 0.286585366 | 0.244444444 | 0.1395349 | 0.2117647 |
| ENSG00000099937 | 0.39457831 | 0.08231707 | 0.39457831 | 0.082317073 | 0.43452381  | 0.4418605 |           |
| ENSG00000178295 |            | 0.47272727 |            | 0.472727273 |             |           | 0.1046512 |
| ENSG00000055044 |            | 0.14044944 |            | 0.140449438 |             |           | 0.0777778 |
| ENSG00000184619 | 0.25149701 |            | 0.25149701 |             | 0.357142857 | 0.3662791 |           |
| ENSG00000163536 | 0.38888889 |            | 0.38888889 |             |             |           |           |
| ENSG00000125249 |            | 0.41212121 |            | 0.412121212 |             |           | 0.4302326 |
| ENSG00000028116 |            | 0.3445122  |            | 0.344512195 | 0.397727273 | 0.3       | 0.4011628 |
| ENSG00000214357 |            | 0.46363636 |            | 0.463636364 |             |           | 0.4651163 |
| ENSG00000172943 |            | 0.13030303 |            | 0.13030303  |             |           |           |
| ENSG00000257028 |            | 0.26666667 |            | 0.266666667 |             |           | 0.0813953 |
| ENSG00000166105 |            | 0.42121212 |            | 0.421212121 |             |           | 0.3255814 |
| ENSG00000114861 | 0.15269461 |            | 0.15269461 |             | 0.279761905 | 0.1117647 | 0.1235294 |
| ENSG00000197272 |            | 0.44242424 |            | 0.442424242 |             |           | 0.2965116 |
| ENSG00000115459 | 0.11676647 | 0.07055215 | 0.11676647 | 0.070552147 | 0.05952381  | 0.0755814 |           |
| ENSG00000073050 | 0.0508982  |            | 0.0508982  |             |             |           |           |
| ENSG00000064666 | 0.12951807 | 0.10909091 | 0.12951807 | 0.109090909 | 0.333333333 | 0.4882353 | 0.1802326 |
| ENSG00000138594 | 0.38888889 | 0.45512821 | 0.38888889 | 0.455128205 | 0.388888889 | 0.4545455 | 0.4772727 |
| ENSG00000174485 | 0.14367816 |            | 0.14367816 |             | 0.261363636 | 0.3414634 |           |
| ENSG00000213853 |            | 0.45757576 |            | 0.457575758 |             |           | 0.4476744 |
| ENSG00000185324 | 0.39520958 | 0.10606061 | 0.39520958 | 0.106060606 | 0.172619048 | 0.244186  | 0.2093023 |
| ENSG00000095380 |            | 0.22121212 |            | 0.221212121 | 0.357142857 | 0.3081395 | 0.0697674 |
| ENSG00000129173 |            | 0.16158537 |            | 0.161585366 |             |           | 0.3588235 |
| ENSG00000174963 | 0.09281437 | 0.36363636 | 0.09281437 | 0.363636364 |             | 0.122093  | 0.4186047 |
| ENSG00000139737 | 0.08682635 | 0.2037037  | 0.08682635 | 0.203703704 | 0.119047619 |           |           |
| ENSG00000128245 |            | 0.25       |            | 0.25        |             |           | 0.0681818 |

|                 |            |            |            |             |             |           |           |
|-----------------|------------|------------|------------|-------------|-------------|-----------|-----------|
| ENSG00000151575 |            | 0.47530864 |            | 0.475308642 |             |           | 0.2108434 |
| ENSG00000119684 | 0.40229885 | 0.41818182 | 0.40229885 | 0.418181818 | 0.125       | 0.1395349 | 0.1860465 |
| ENSG00000170367 |            | 0.3974359  |            | 0.397435897 |             |           | 0.4268293 |
| ENSG00000170903 |            | 0.39329268 |            | 0.393292683 | 0.318181818 | 0.3068182 | 0.4127907 |
| ENSG00000159182 | 0.36227545 |            | 0.36227545 |             | 0.403614458 | 0.3255814 |           |
| ENSG00000188508 |            | 0.26060606 |            | 0.260606061 |             |           |           |
| ENSG00000056558 | 0.41616766 | 0.49090909 | 0.41616766 | 0.490909091 | 0.488095238 | 0.4186047 | 0.4545455 |
| ENSG00000130487 |            | 0.48876404 |            | 0.488764045 |             |           | 0.3977273 |
| ENSG00000131148 |            | 0.17272727 |            | 0.172727273 |             |           | 0.2906977 |
| ENSG00000102302 |            | 0.05487805 |            | 0.054878049 |             |           | 0.4418605 |
| ENSG00000119514 |            |            |            |             |             |           | 0.25      |
| ENSG00000159208 | 0.25       | 0.30555556 | 0.25       | 0.305555556 | 0.208333333 | 0.2848837 | 0.4       |
| ENSG00000204003 | 0.259375   | 0.14545455 | 0.259375   | 0.145454545 | 0.292682927 | 0.186747  | 0.2093023 |
| ENSG00000070915 |            | 0.48333333 |            | 0.483333333 |             |           | 0.4529412 |
| ENSG00000167930 | 0.11931818 |            | 0.11931818 |             | 0.444444444 | 0.375     |           |
| ENSG00000109163 |            | 0.42682927 |            | 0.426829268 |             |           | 0.2678571 |
| ENSG00000174473 | 0.32335329 | 0.26969697 | 0.32335329 | 0.26969697  | 0.154761905 | 0.1104651 | 0.0523256 |
| ENSG00000122420 |            | 0.2        |            | 0.2         |             |           | 0.1529412 |
| ENSG00000120008 | 0.22289157 | 0.34848485 | 0.22289157 | 0.348484848 | 0.077777778 | 0.0568182 | 0.3470588 |
| ENSG00000177990 | 0.12359551 | 0.18404908 | 0.12359551 | 0.18404908  | 0.1         |           | 0.3409091 |
| ENSG00000114115 |            | 0.25294118 |            | 0.252941176 |             |           | 0.0697674 |
| ENSG00000177570 |            | 0.35955056 |            | 0.359550562 |             |           | 0.4651163 |
| ENSG00000144559 | 0.47126437 | 0.44242424 | 0.47126437 | 0.442424242 | 0.266666667 | 0.2380952 | 0.25      |
| ENSG00000128815 |            | 0.44848485 |            | 0.448484848 |             |           | 0.3604651 |
| ENSG00000078596 |            | 0.33333333 |            | 0.333333333 |             |           | 0.4593023 |
| ENSG00000120049 |            | 0.27777778 |            | 0.277777778 |             |           | 0.4244186 |
| ENSG00000253910 |            | 0.20224719 |            | 0.202247191 |             |           | 0.1477273 |
| ENSG00000137766 |            | 0.11818182 |            | 0.118181818 |             |           | 0.1162791 |
| ENSG00000119720 |            | 0.44242424 |            | 0.442424242 |             |           | 0.4764706 |
| ENSG00000151292 |            | 0.42222222 |            | 0.422222222 |             |           | 0.3181818 |
| ENSG00000013588 |            | 0.5        |            | 0.5         |             |           | 0.2790698 |
| ENSG00000188992 |            | 0.5        |            | 0.5         |             |           | 0.4825581 |
| ENSG00000176422 |            | 0.14723926 |            | 0.147239264 |             |           | 0.0988372 |
| ENSG00000129990 | 0.15882353 |            | 0.15882353 |             | 0.277777778 | 0.2906977 |           |
| ENSG00000244754 |            | 0.33707865 |            | 0.337078652 |             |           | 0.1704545 |
| ENSG00000105738 |            | 0.45121951 |            | 0.451219512 |             |           | 0.3081395 |
| ENSG00000183631 |            | 0.20786517 |            | 0.207865169 |             |           | 0.1477273 |
| ENSG00000197536 |            | 0.47575758 |            | 0.475757576 |             |           | 0.3953488 |
| ENSG00000174547 |            | 0.27469136 |            | 0.274691358 |             |           | 0.3081395 |
| ENSG00000170927 |            | 0.45454545 |            | 0.454545455 |             |           | 0.1566265 |
| ENSG00000197170 |            | 0.40797546 |            | 0.40797546  |             |           | 0.3977273 |
| ENSG00000123338 |            | 0.25280899 |            | 0.252808989 |             |           | 0.3255814 |
| ENSG00000125843 | 0.10179641 |            | 0.10179641 |             |             |           |           |
| ENSG00000174808 |            | 0.29268293 |            | 0.292682927 |             |           | 0.4825581 |
| ENSG00000149311 |            | 0.47865854 |            | 0.478658537 |             |           | 0.4244186 |
| ENSG00000054219 |            | 0.43030303 |            | 0.43030303  |             |           | 0.3837209 |
| ENSG00000152409 |            | 0.41212121 |            | 0.412121212 |             |           | 0.4825581 |
| ENSG00000126453 | 0.30239521 | 0.06969697 | 0.30239521 | 0.06969697  | 0.273809524 | 0.2151163 |           |
| ENSG00000158477 | 0.41317365 |            | 0.41317365 |             | 0.380952381 | 0.3255814 |           |
| ENSG00000137726 | 0.47305389 | 0.40909091 | 0.47305389 | 0.409090909 | 0.476190476 | 0.4651163 | 0.2616279 |
| ENSG00000149639 |            | 0.32208589 |            | 0.32208589  |             |           | 0.2882353 |
| ENSG00000152457 | 0.2994012  | 0.24242424 | 0.2994012  | 0.242424242 | 0.28313253  | 0.3139535 | 0.4761905 |
| ENSG00000124145 | 0.11976048 | 0.23636364 | 0.11976048 | 0.236363636 | 0.44047619  | 0.4534884 | 0.4476744 |
| ENSG00000149557 | 0.32335329 |            | 0.32335329 |             | 0.083333333 | 0.122093  |           |

|                 |            |            |            |             |             |           |           |
|-----------------|------------|------------|------------|-------------|-------------|-----------|-----------|
| ENSG00000112210 |            | 0.14848485 |            | 0.148484848 |             |           |           |
| ENSG00000214595 |            | 0.4137931  |            | 0.413793103 |             |           | 0.4318182 |
| ENSG00000142149 |            | 0.36890244 |            | 0.368902439 |             |           | 0.372093  |
| ENSG00000122224 |            | 0.49444444 |            | 0.494444444 |             |           | 0.3222222 |
| ENSG00000157017 | 0.28742515 |            | 0.28742515 |             | 0.344444444 |           | 0.3444444 |
| ENSG00000028528 |            | 0.2        |            | 0.2         |             |           | 0.1918605 |
| ENSG00000142552 | 0.05688623 |            | 0.05688623 |             |             |           |           |
| ENSG00000077549 | 0.42215569 | 0.14705882 | 0.42215569 | 0.147058824 | 0.297619048 | 0.3895349 | 0.3375    |
| ENSG00000125384 |            | 0.13125    |            | 0.13125     |             |           | 0.3837209 |
| ENSG00000250423 |            |            |            |             |             |           | 0.4294118 |
| ENSG00000241644 |            | 0.10625    |            | 0.10625     |             |           | 0.2048193 |
| ENSG00000163818 |            | 0.36363636 |            | 0.363636364 |             |           | 0.4651163 |
| ENSG00000113594 |            | 0.39393939 |            | 0.393939394 |             |           | 0.4090909 |
| ENSG00000189233 |            | 0.46629213 |            | 0.466292135 |             |           | 0.1904762 |
| ENSG00000144554 |            | 0.40606061 |            | 0.406060606 |             |           | 0.1744186 |
| ENSG00000102543 |            | 0.42777778 |            | 0.427777778 |             |           | 0.4886364 |
| ENSG00000180660 |            | 0.33939394 |            | 0.339393939 |             |           | 0.4360465 |
| ENSG00000108342 | 0.38068182 | 0.37575758 | 0.38068182 | 0.375757576 | 0.388888889 | 0.4418605 | 0.3953488 |
| ENSG00000124104 |            | 0.05172414 |            | 0.051724138 |             |           |           |
| ENSG00000104043 | 0.38636364 | 0.47777778 | 0.38636364 | 0.477777778 | 0.433333333 | 0.4772727 | 0.4345238 |
| ENSG00000169894 |            | 0.27777778 |            | 0.277777778 |             |           |           |
| ENSG00000221923 |            | 0.37272727 |            | 0.372727273 |             |           | 0.3255814 |
| ENSG00000140043 | 0.43333333 | 0.39329268 | 0.43333333 | 0.393292683 | 0.422619048 | 0.4204545 | 0.4476744 |
| ENSG00000182534 |            | 0.10060976 |            | 0.100609756 |             |           | 0.4705882 |
| ENSG00000135362 | 0.09337349 | 0.41212121 | 0.09337349 | 0.412121212 |             |           | 0.2093023 |
| ENSG00000171368 |            | 0.31212121 |            | 0.312121212 |             |           | 0.4069767 |
| ENSG00000168961 | 0.13173653 | 0.21910112 | 0.13173653 | 0.219101124 | 0.345238095 | 0.3058824 | 0.25      |
| ENSG00000100253 |            | 0.33908046 |            | 0.33908046  |             |           | 0.4431818 |
| ENSG00000257727 |            | 0.05757576 |            | 0.057575758 | 0.19047619  | 0.2093023 | 0.3176471 |
| ENSG00000164112 | 0.11842105 | 0.17575758 | 0.11842105 | 0.175757576 | 0.5         | 0.4127907 | 0.0930233 |
| ENSG00000137513 | 0.47878788 | 0.13333333 | 0.47878788 | 0.133333333 | 0.458333333 | 0.4069767 | 0.4204545 |
| ENSG00000186197 | 0.44736842 | 0.39634146 | 0.44736842 | 0.396341463 | 0.4125      | 0.4102564 | 0.25      |
| ENSG00000099958 |            | 0.13636364 |            | 0.136363636 |             |           | 0.3837209 |
| ENSG00000134940 |            | 0.3969697  |            | 0.396969697 |             |           | 0.2325581 |
| ENSG00000213888 |            | 0.14545455 |            | 0.145454545 |             |           | 0.4767442 |
| ENSG00000133107 | 0.45508982 | 0.19444444 | 0.45508982 | 0.194444444 | 0.321428571 | 0.3197674 | 0.3604651 |
| ENSG00000163171 |            | 0.27222222 |            | 0.272222222 |             | 0.0523256 | 0.4666667 |
| ENSG00000177565 |            | 0.39444444 |            | 0.394444444 |             |           | 0.5       |
| ENSG00000213638 | 0.46407186 |            | 0.46407186 |             | 0.363095238 | 0.494186  |           |
| ENSG00000196655 | 0.39520958 | 0.2347561  | 0.39520958 | 0.234756098 |             | 0.0988372 | 0.1046512 |
| ENSG00000214725 | 0.49700599 |            | 0.49700599 |             | 0.109756098 | 0.0952381 |           |
| ENSG00000187726 |            | 0.2969697  |            | 0.296969697 |             |           | 0.3023256 |
| ENSG00000149541 | 0.23952096 |            | 0.23952096 |             |             |           |           |
| ENSG00000204084 |            | 0.25757576 |            | 0.257575758 |             |           | 0.377907  |
| ENSG00000174989 |            | 0.32727273 |            | 0.327272727 |             |           | 0.3372093 |
| ENSG00000050555 |            | 0.45977011 |            | 0.459770115 |             |           | 0.4825581 |
| ENSG00000156875 |            | 0.35795455 |            | 0.357954545 |             |           | 0.3777778 |
| ENSG00000259491 | 0.27108434 | 0.2607362  | 0.27108434 | 0.260736196 | 0.220238095 | 0.1860465 | 0.1686047 |
| ENSG00000132321 |            | 0.16969697 |            | 0.16969697  |             |           |           |
| ENSG00000186510 | 0.2245509  |            | 0.2245509  |             |             |           |           |
| ENSG00000172766 |            | 0.30681818 |            | 0.306818182 |             |           | 0.2954545 |
| ENSG00000101986 | 0.07272727 |            | 0.07272727 |             |             |           |           |
| ENSG00000152492 |            | 0.46341463 |            | 0.463414634 |             |           | 0.4886364 |
| ENSG00000184640 | 0.35542169 | 0.5        | 0.35542169 | 0.5         | 0.43452381  | 0.4235294 | 0.1802326 |

|                 |            |            |            |             |             |           |           |
|-----------------|------------|------------|------------|-------------|-------------|-----------|-----------|
| ENSG00000169189 |            | 0.39090909 |            | 0.390909091 |             |           | 0.4651163 |
| ENSG00000174165 | 0.19161677 | 0.27878788 | 0.19161677 | 0.278787879 | 0.119047619 | 0.1511628 | 0.3214286 |
| ENSG00000255112 |            | 0.20909091 |            | 0.209090909 | 0.375       | 0.2333333 |           |
| ENSG00000146833 |            | 0.49444444 |            | 0.494444444 |             |           | 0.2954545 |
| ENSG00000127249 |            | 0.43636364 |            | 0.436363636 |             |           | 0.4941176 |
| ENSG00000006327 |            | 0.26666667 |            | 0.266666667 |             |           | 0.1136364 |
| ENSG00000213626 |            | 0.25842697 |            | 0.258426966 |             |           | 0.2325581 |
| ENSG00000039123 | 0.40718563 | 0.05757576 | 0.40718563 | 0.057575758 | 0.5         | 0.4244186 | 0.244186  |
| ENSG00000204128 |            | 0.15757576 |            | 0.157575758 |             |           | 0.2034884 |
| ENSG00000125630 |            | 0.47222222 |            | 0.472222222 |             |           | 0.3636364 |
| ENSG00000130826 |            | 0.10122699 |            | 0.101226994 |             |           |           |
| ENSG00000237765 | 0.0505618  |            | 0.0505618  |             |             |           |           |
| ENSG00000164975 |            | 0.16257669 |            | 0.162576687 |             |           | 0.2738095 |
| ENSG00000101220 |            |            |            | 0.113095238 |             | 0.1104651 |           |
| ENSG00000188959 | 0.41111111 | 0.28963415 | 0.41111111 | 0.289634146 | 0.172619048 | 0.1686047 | 0.1764706 |
| ENSG00000178772 |            | 0.37272727 |            | 0.372727273 |             |           | 0.3529412 |
| ENSG00000164062 |            | 0.25454545 |            | 0.254545455 |             |           | 0.0813953 |
| ENSG00000228146 | 0.34131737 |            | 0.34131737 |             | 0.160714286 | 0.1744186 |           |
| ENSG00000163006 |            | 0.22413793 |            | 0.224137931 |             |           | 0.1627907 |
| ENSG00000007376 |            | 0.22727273 |            | 0.227272727 |             |           | 0.3       |
| ENSG00000166123 |            | 0.08484848 |            | 0.084848485 |             |           |           |
| ENSG00000136897 |            | 0.33636364 |            | 0.336363636 |             |           | 0.4772727 |
| ENSG00000165264 | 0.0873494  | 0.47191011 | 0.0873494  | 0.471910112 |             |           | 0.0909091 |
| ENSG00000160877 |            | 0.32515337 |            | 0.325153374 |             |           | 0.1022727 |
| ENSG00000008196 | 0.3502994  | 0.2797619  | 0.3502994  | 0.279761905 | 0.196428571 | 0.2209302 | 0.2325581 |
| ENSG00000086619 | 0.15555556 | 0.46969697 | 0.15555556 | 0.46969697  |             |           | 0.313253  |
| ENSG00000047056 |            | 0.41573034 |            | 0.415730337 |             |           | 0.4418605 |
| ENSG00000141337 |            |            |            | 0.285714286 |             | 0.3953488 |           |
| ENSG00000050730 | 0.09281437 | 0.3        | 0.09281437 | 0.3         |             |           |           |
| ENSG00000088387 | 0.24850299 | 0.41954023 | 0.24850299 | 0.41954023  | 0.297619048 | 0.3197674 | 0.4204545 |
| ENSG00000196684 |            | 0.11212121 |            | 0.112121212 |             |           |           |
| ENSG00000213918 | 0.13190184 |            | 0.13190184 |             |             |           |           |
| ENSG00000106635 | 0.36809816 |            | 0.36809816 |             |             |           | 0.1802326 |
| ENSG00000183103 | 0.12275449 |            | 0.12275449 |             |             |           |           |
| ENSG00000188971 |            | 0.45757576 |            | 0.457575758 |             |           | 0.1802326 |
| ENSG00000105997 | 0.40909091 |            | 0.40909091 |             | 0.133333333 | 0.1590909 |           |
| ENSG00000003509 | 0.28443114 | 0.26363636 | 0.28443114 | 0.263636364 |             |           | 0.4767442 |
| ENSG00000198039 |            | 0.47727273 |            | 0.477272727 |             |           | 0.4886364 |
| ENSG00000115271 | 0.42215569 |            | 0.42215569 |             | 0.107142857 | 0.1666667 |           |
| ENSG00000181544 | 0.17777778 |            | 0.17777778 |             | 0.211111111 | 0.1704545 |           |
| ENSG00000090905 |            | 0.16666667 |            | 0.166666667 |             |           | 0.0639535 |
| ENSG00000241690 |            |            |            |             |             |           | 0.1569767 |
| ENSG00000160410 |            |            |            | 0.273809524 |             | 0.1918605 |           |
| ENSG00000112159 |            | 0.31111111 |            | 0.311111111 |             |           |           |
| ENSG00000167306 |            | 0.49444444 |            | 0.494444444 |             |           | 0.4886364 |
| ENSG00000105352 |            |            |            |             |             |           | 0.4545455 |
| ENSG00000064225 | 0.35393258 | 0.33333333 | 0.35393258 | 0.333333333 | 0.222222222 | 0.1777778 | 0.2111111 |
| ENSG00000124701 |            | 0.11111111 |            | 0.111111111 |             |           |           |
| ENSG00000129195 |            | 0.33333333 |            | 0.333333333 |             |           | 0.2797619 |
| ENSG00000166619 | 0.12650602 |            | 0.12650602 |             |             |           |           |
| ENSG00000113387 | 0.29775281 | 0.39325843 | 0.29775281 | 0.393258427 | 0.344444444 | 0.375     | 0.4       |
| ENSG00000120699 | 0.4011976  |            | 0.4011976  |             | 0.279761905 | 0.25      |           |
| ENSG00000132692 |            | 0.46363636 |            | 0.463636364 |             |           | 0.4941176 |
| ENSG00000155957 | 0.23652695 | 0.37575758 | 0.23652695 | 0.375757576 | 0.4         | 0.4545455 | 0.4659091 |

|                 |            |            |            |             |             |           |           |
|-----------------|------------|------------|------------|-------------|-------------|-----------|-----------|
| ENSG00000131398 |            | 0.36060606 |            | 0.360606061 |             |           | 0.3705882 |
| ENSG00000107290 |            | 0.17682927 |            | 0.176829268 |             |           | 0.4939759 |
| ENSG00000130227 |            | 0.48255814 |            | 0.48255814  |             |           |           |
| ENSG00000062038 | 0.2962963  | 0.10606061 | 0.2962963  | 0.106060606 |             |           | 0.2325581 |
| ENSG00000182983 |            | 0.24375    |            | 0.24375     |             |           | 0.0795455 |
| ENSG00000151917 |            | 0.20245399 |            | 0.202453988 |             |           | 0.0952381 |
| ENSG00000132639 |            | 0.37272727 |            | 0.372727273 |             |           | 0.3470588 |
| ENSG00000063587 | 0.41616766 | 0.4695122  | 0.41616766 | 0.469512195 | 0.451807229 | 0.4882353 | 0.3977273 |
| ENSG00000168273 |            | 0.40243902 |            | 0.402439024 |             |           | 0.494186  |
| ENSG00000188825 | 0.32335329 | 0.08522727 | 0.32335329 | 0.085227273 | 0.345238095 | 0.3546512 | 0.2159091 |
| ENSG00000133138 | 0.28143713 |            | 0.28143713 |             |             |           |           |
| ENSG00000186526 | 0.46590909 | 0.29310345 | 0.46590909 | 0.293103448 | 0.4         | 0.4318182 | 0.2840909 |
| ENSG00000145721 | 0.19760479 | 0.2969697  | 0.19760479 | 0.296969697 |             |           | 0.3588235 |
| ENSG00000074054 |            | 0.2208589  |            | 0.220858896 |             |           | 0.1130952 |
| ENSG00000187736 |            | 0.24545455 |            | 0.245454545 |             |           | 0.4651163 |
| ENSG00000198768 | 0.05       | 0.42424242 | 0.05       | 0.424242424 |             |           | 0.327381  |
| ENSG00000149257 | 0.44610778 | 0.28353659 | 0.44610778 | 0.283536585 | 0.321428571 | 0.4302326 | 0.1686047 |
| ENSG00000131504 | 0.16149068 | 0.08181818 | 0.16149068 | 0.081818182 |             |           |           |
| ENSG00000144810 | 0.34730539 | 0.37078652 | 0.34730539 | 0.370786517 | 0.154761905 | 0.1395349 | 0.2209302 |
| ENSG00000154548 |            | 0.45757576 |            | 0.457575758 |             |           | 0.2823529 |
| ENSG00000160013 |            | 0.34545455 |            | 0.345454545 |             |           |           |
| ENSG00000081307 | 0.41515152 | 0.1402439  | 0.41515152 | 0.140243902 | 0.488095238 | 0.3197674 | 0.3235294 |
| ENSG00000012504 |            |            |            |             |             |           | 0.3139535 |
| ENSG00000135750 | 0.39520958 |            | 0.39520958 |             | 0.345238095 | 0.4127907 |           |
| ENSG00000167394 | 0.20658683 |            | 0.20658683 |             | 0.053571429 | 0.1       |           |
| ENSG00000179698 |            | 0.07878788 |            | 0.078787879 |             |           |           |
| ENSG00000177096 | 0.09281437 | 0.3045977  | 0.09281437 | 0.304597701 | 0.172619048 | 0.1802326 | 0.1818182 |
| ENSG00000167380 | 0.0748503  |            | 0.0748503  |             | 0.470238095 | 0.4767442 |           |
| ENSG00000101849 |            | 0.47575758 |            | 0.475757576 |             |           | 0.3895349 |
| ENSG00000128602 |            | 0.21818182 |            | 0.218181818 |             |           | 0.2616279 |
| ENSG00000136925 | 0.39759036 | 0.36969697 | 0.39759036 | 0.36969697  | 0.481927711 | 0.4883721 | 0.4883721 |
| ENSG00000006283 |            | 0.10909091 |            | 0.109090909 |             |           | 0.0755814 |
| ENSG00000240891 |            | 0.12804878 |            | 0.12804878  |             |           |           |
| ENSG00000113845 |            | 0.2030303  |            | 0.203030303 |             |           | 0.2965116 |
| ENSG00000106780 |            | 0.34545455 |            | 0.345454545 |             |           | 0.3882353 |
| ENSG00000259347 |            | 0.05       |            | 0.05        |             |           |           |
| ENSG00000120925 |            | 0.30606061 |            | 0.306060606 |             |           | 0.3313953 |
| ENSG00000120328 | 0.21257485 |            | 0.21257485 |             | 0.107142857 | 0.1918605 |           |
| ENSG00000204962 |            | 0.05151515 |            | 0.051515152 |             |           | 0.1162791 |
| ENSG00000169087 | 0.49101796 | 0.1030303  | 0.49101796 | 0.103030303 | 0.369047619 | 0.4294118 | 0.127907  |
| ENSG00000253389 |            | 0.42121212 |            | 0.421212121 |             |           | 0.4709302 |
| ENSG00000159403 |            | 0.16666667 |            | 0.166666667 |             |           | 0.4476744 |
| ENSG00000111404 |            | 0.11212121 |            | 0.112121212 |             |           |           |
| ENSG00000182450 | 0.48502994 | 0.19135802 | 0.48502994 | 0.191358025 | 0.101190476 | 0.1046512 | 0.4375    |
| ENSG00000167633 |            |            |            |             |             |           | 0.1627907 |
| ENSG00000213213 | 0.19461078 | 0.17575758 | 0.19461078 | 0.175757576 | 0.168674699 | 0.2705882 | 0.1162791 |
| ENSG00000186432 |            | 0.47575758 |            | 0.475757576 |             |           | 0.2352941 |
| ENSG00000104059 |            | 0.20114943 |            | 0.201149425 |             |           | 0.4352941 |
| ENSG00000143507 | 0.39204545 |            | 0.39204545 |             | 0.077777778 | 0.1363636 |           |
| ENSG00000124562 | 0.21856287 |            | 0.21856287 |             | 0.154761905 | 0.0988372 |           |
| ENSG00000178233 |            | 0.26060606 |            | 0.260606061 |             |           | 0.377907  |
| ENSG00000120669 |            | 0.39444444 |            | 0.394444444 |             |           | 0.1363636 |
| ENSG00000122786 |            | 0.23333333 |            | 0.233333333 |             |           | 0.3546512 |
| ENSG00000166405 | 0.31437126 | 0.36060606 | 0.31437126 | 0.360606061 | 0.5         | 0.3662791 | 0.4880952 |

|                 |            |            |            |             |             |           |           |
|-----------------|------------|------------|------------|-------------|-------------|-----------|-----------|
| ENSG00000107954 |            | 0.36060606 |            | 0.360606061 |             |           | 0.2674419 |
| ENSG00000167244 | 0.09580838 | 0.33939394 | 0.09580838 | 0.339393939 | 0.379518072 | 0.4651163 | 0.4823529 |
| ENSG00000213901 |            | 0.24545455 |            | 0.245454545 |             |           | 0.4651163 |
| ENSG00000166947 | 0.1547619  | 0.08484848 | 0.1547619  | 0.084848485 |             |           | 0.0666667 |
| ENSG00000131437 |            | 0.2987013  |            | 0.298701299 |             |           | 0.2777778 |
| ENSG00000177370 |            |            |            |             |             |           | 0.255814  |
| ENSG00000154274 |            | 0.28353659 |            | 0.283536585 |             |           | 0.4235294 |
| ENSG00000122390 | 0.19161677 | 0.25151515 | 0.19161677 | 0.251515152 | 0.113095238 | 0.0872093 | 0.4534884 |
| ENSG00000158710 | 0.19736842 |            | 0.19736842 |             |             |           |           |
| ENSG00000070495 |            | 0.49390244 |            | 0.493902439 |             |           | 0.2732558 |
| ENSG00000103005 |            |            |            |             | 0.113095238 |           |           |
| ENSG00000184408 | 0.19760479 | 0.17391304 | 0.19760479 | 0.173913043 |             |           | 0.439759  |
| ENSG00000058673 | 0.16666667 |            | 0.16666667 |             | 0.366666667 | 0.3372093 |           |
| ENSG00000129128 |            | 0.15337423 |            | 0.153374233 |             |           | 0.2732558 |
| ENSG00000183196 |            | 0.43636364 |            | 0.436363636 |             |           | 0.4476744 |
| ENSG00000091128 |            | 0.05487805 |            | 0.054878049 |             |           |           |
| ENSG00000167232 |            | 0.41111111 |            | 0.411111111 |             |           | 0.4418605 |
| ENSG00000159267 | 0.10542169 | 0.41954023 | 0.10542169 | 0.41954023  |             | 0.0581395 | 0.4659091 |
| ENSG00000251380 |            | 0.26363636 |            | 0.263636364 |             |           | 0.2732558 |
| ENSG00000101126 |            | 0.25914634 |            | 0.259146341 | 0.095238095 | 0.0813953 | 0.4360465 |
| ENSG00000117394 |            | 0.27011494 |            | 0.270114943 |             |           | 0.3636364 |
| ENSG00000114650 | 0.46706587 |            | 0.46706587 |             |             |           |           |
| ENSG00000016402 |            | 0.3969697  |            | 0.396969697 | 0.096385542 |           | 0.1918605 |
| ENSG00000172519 | 0.14444444 |            | 0.14444444 |             | 0.2         | 0.1       |           |
| ENSG00000085741 |            | 0.29444444 |            | 0.294444444 |             |           |           |
| ENSG00000077080 |            | 0.15454545 |            | 0.154545455 |             |           |           |
| ENSG00000152932 |            | 0.48863636 |            | 0.488636364 |             |           | 0.5       |
| ENSG00000256061 | 0.40588235 | 0.43636364 | 0.40588235 | 0.436363636 | 0.071428571 |           | 0.3953488 |
| ENSG00000169967 |            | 0.40606061 |            | 0.406060606 |             |           | 0.3522727 |
| ENSG00000163131 | 0.11666667 | 0.43030303 | 0.11666667 | 0.43030303  | 0.388888889 | 0.5       | 0.3941176 |
| ENSG00000149256 | 0.09281437 | 0.35454545 | 0.09281437 | 0.354545455 |             |           | 0.4186047 |
| ENSG00000173436 |            | 0.2        |            | 0.2         |             |           | 0.3546512 |
| ENSG00000064490 | 0.19461078 |            | 0.19461078 |             | 0.327380952 | 0.3662791 |           |
| ENSG00000109971 | 0.49401198 |            | 0.49401198 |             | 0.463414634 | 0.4767442 |           |
| ENSG00000141298 |            | 0.49090909 |            | 0.490909091 |             |           | 0.2674419 |
| ENSG00000139151 | 0.37951807 | 0.08282209 | 0.37951807 | 0.082822086 | 0.353658537 | 0.4302326 |           |
| ENSG00000144119 |            | 0.25454545 |            | 0.254545455 |             |           | 0.3662791 |
| ENSG00000165566 |            | 0.20555556 |            | 0.205555556 |             |           | 0.4302326 |
| ENSG00000165702 |            | 0.44252874 |            | 0.442528736 | 0.357142857 | 0.2916667 | 0.4545455 |
| ENSG00000143032 |            | 0.44409938 |            | 0.444099379 |             |           | 0.4117647 |
| ENSG00000183128 |            | 0.26363636 |            | 0.263636364 |             |           | 0.1453488 |
| ENSG00000129566 | 0.45209581 | 0.40606061 | 0.45209581 | 0.406060606 | 0.125       | 0.0581395 | 0.3953488 |
| ENSG00000168259 | 0.41111111 |            | 0.41111111 |             | 0.155555556 | 0.1477273 |           |
| ENSG00000099864 | 0.26234568 | 0.31460674 | 0.26234568 | 0.314606742 | 0.482142857 | 0.4638554 |           |
| ENSG00000046647 | 0.21818182 |            | 0.21818182 |             |             |           |           |
| ENSG00000152464 | 0.49700599 |            | 0.49700599 |             | 0.054216867 |           |           |
| ENSG00000185088 | 0.16666667 | 0.07272727 | 0.16666667 | 0.072727273 | 0.493975904 | 0.4659091 | 0.4651163 |
| ENSG00000213015 | 0.23353293 | 0.26969697 | 0.23353293 | 0.26969697  | 0.416666667 | 0.4069767 | 0.1744186 |
| ENSG00000049245 |            | 0.20114943 |            | 0.201149425 |             |           |           |
| ENSG00000124688 |            | 0.29393939 |            | 0.293939394 |             |           |           |
| ENSG00000183624 |            | 0.1        |            | 0.1         |             |           |           |
| ENSG00000109743 |            | 0.23636364 |            | 0.236363636 |             |           | 0.3863636 |
| ENSG00000182851 |            | 0.221875   |            | 0.221875    |             |           | 0.3372093 |
| ENSG00000227051 | 0.31481481 | 0.39393939 | 0.31481481 | 0.393939394 |             | 0.195122  | 0.4883721 |



|                |            |            |            |             |             |           |           |
|----------------|------------|------------|------------|-------------|-------------|-----------|-----------|
| ENSG0000071282 | 0.35555556 | 0.32727273 | 0.35555556 | 0.327272727 | 0.066666667 |           | 0.0697674 |
| ENSG0000126500 | 0.38505747 | 0.30606061 | 0.38505747 | 0.306060606 | 0.395348837 | 0.4659091 | 0.2678571 |
| ENSG0000243709 |            |            |            |             |             |           | 0.255814  |
| ENSG0000169495 |            | 0.47878788 |            | 0.478787879 |             |           | 0.3176471 |
| ENSG0000206150 | 0.31437126 | 0.36969697 | 0.31437126 | 0.36969697  | 0.095238095 | 0.0988372 | 0.3352941 |
| ENSG0000134250 |            | 0.11212121 |            | 0.112121212 |             | 0.0662651 |           |
| ENSG0000166111 |            | 0.36969697 |            | 0.36969697  | 0.1125      | 0.1341463 | 0.4825581 |
| ENSG0000135148 |            | 0.11890244 |            | 0.118902439 |             |           | 0.2325581 |
| ENSG0000166959 | 0.18562874 |            | 0.18562874 |             | 0.05952381  | 0.0581395 |           |
| ENSG0000001630 |            | 0.4        |            | 0.4         |             |           | 0.1777778 |
| ENSG0000159579 | 0.41916168 |            | 0.41916168 |             | 0.380952381 | 0.2848837 |           |
| ENSG0000214279 | 0.06741573 | 0.22727273 | 0.06741573 | 0.227272727 | 0.323170732 | 0.2650602 | 0.4534884 |
| ENSG0000121067 |            | 0.07878788 |            | 0.078787879 |             |           | 0.1666667 |
| ENSG0000107338 |            |            |            |             |             |           | 0.122093  |
| ENSG0000115425 |            | 0.43518519 |            | 0.435185185 |             |           | 0.4529412 |
| ENSG0000135314 | 0.18888889 |            | 0.18888889 |             | 0.3         | 0.2272727 |           |
| ENSG0000161011 |            | 0.5        |            | 0.5         |             |           | 0.1976744 |
| ENSG0000213971 |            | 0.35       |            | 0.35        |             |           | 0.3181818 |
| ENSG0000106070 | 0.35329341 | 0.18181818 | 0.35329341 | 0.181818182 | 0.386904762 | 0.3117647 | 0.0639535 |
| ENSG0000241370 |            | 0.13888889 |            | 0.138888889 |             |           | 0.4772727 |
| ENSG0000088888 |            | 0.41818182 |            | 0.418181818 |             |           | 0.372093  |
| ENSG0000145390 | 0.42814371 | 0.41818182 | 0.42814371 | 0.418181818 | 0.273809524 | 0.2209302 | 0.4593023 |
| ENSG0000167965 |            | 0.48742138 |            | 0.487421384 |             |           | 0.4268293 |
| ENSG0000128253 | 0.35       |            | 0.35       |             |             |           |           |
| ENSG0000123607 |            | 0.47878788 |            | 0.478787879 |             |           | 0.4825581 |
| ENSG0000167191 |            | 0.28484848 |            | 0.284848485 |             |           | 0.4534884 |
| ENSG0000139182 |            | 0.07317073 |            | 0.073170732 |             |           |           |
| ENSG0000089169 | 0.39444444 | 0.48181818 | 0.39444444 | 0.481818182 | 0.166666667 | 0.2111111 | 0.4709302 |
| ENSG0000187796 |            | 0.43888889 |            | 0.438888889 |             |           | 0.0795455 |
| ENSG0000179477 | 0.48757764 |            | 0.48757764 |             | 0.369047619 | 0.2848837 |           |
| ENSG0000175322 |            | 0.36842105 |            | 0.368421053 |             |           | 0.2631579 |
| ENSG0000166278 |            | 0.07361963 |            | 0.073619632 |             |           | 0.0755814 |
| ENSG0000170296 |            | 0.11666667 |            | 0.116666667 |             |           | 0.2616279 |
| ENSG0000164663 |            | 0.45757576 |            | 0.457575758 |             |           | 0.372093  |
| ENSG0000106541 | 0.2754491  | 0.22727273 | 0.2754491  | 0.227272727 | 0.416666667 | 0.4244186 | 0.3295455 |
| ENSG0000106113 | 0.43125    | 0.07386364 | 0.43125    | 0.073863636 | 0.465909091 | 0.3522727 | 0.2159091 |
| ENSG0000158186 | 0.37777778 | 0.16158537 | 0.37777778 | 0.161585366 | 0.166666667 | 0.3977273 | 0.2151163 |
| ENSG0000062582 |            | 0.08333333 |            | 0.083333333 |             |           | 0.1931818 |
| ENSG0000215712 |            | 0.27575758 |            | 0.275757576 |             |           | 0.4117647 |
| ENSG0000184007 |            | 0.12804878 |            | 0.12804878  |             |           | 0.4186047 |
| ENSG0000122378 |            | 0.33636364 |            | 0.336363636 |             |           | 0.1686047 |
| ENSG0000140564 |            | 0.39090909 |            | 0.390909091 |             |           | 0.4825581 |
| ENSG0000180438 | 0.23170732 | 0.37804878 | 0.23170732 | 0.37804878  | 0.353658537 | 0.3235294 | 0.3372093 |
| ENSG0000003249 |            |            |            |             |             |           | 0.0705882 |
| ENSG0000225362 |            | 0.17977528 |            | 0.179775281 |             |           | 0.2093023 |
| ENSG0000135835 | 0.32634731 | 0.43939394 | 0.32634731 | 0.439393939 | 0.377777778 | 0.4634146 | 0.4883721 |
| ENSG0000258792 |            | 0.29090909 |            | 0.290909091 |             |           | 0.3139535 |
| ENSG0000154642 |            | 0.47256098 |            | 0.472560976 |             |           | 0.5       |
| ENSG0000166104 |            | 0.48876404 |            | 0.488764045 |             |           | 0.1363636 |
| ENSG0000122824 | 0.43373494 |            | 0.43373494 |             | 0.267857143 | 0.2034884 |           |
| ENSG0000154556 | 0.40419162 | 0.23170732 | 0.40419162 | 0.231707317 | 0.321428571 | 0.2267442 | 0.2848837 |
| ENSG0000196559 |            | 0.37962963 |            | 0.37962963  |             |           | 0.2151163 |
| ENSG0000242221 |            |            |            |             | 0.088888889 |           |           |
| ENSG0000104332 |            | 0.41818182 |            | 0.418181818 |             |           | 0.4186047 |

|                 |            |            |            |             |             |  |           |           |
|-----------------|------------|------------|------------|-------------|-------------|--|-----------|-----------|
| ENSG00000162836 | 0.35555556 |            | 0.35555556 |             | 0.42222222  |  | 0.25      |           |
| ENSG00000127084 | 0.46107784 |            | 0.46107784 |             | 0.482142857 |  | 0.377907  |           |
| ENSG00000164597 |            | 0.47575758 |            | 0.475757576 |             |  | 0.4534884 |           |
| ENSG00000213533 |            | 0.33231707 |            | 0.332317073 |             |  | 0.3888889 |           |
| ENSG00000182149 |            | 0.25454545 |            | 0.254545455 | 0.144444444 |  | 0.1444444 |           |
| ENSG00000172954 |            | 0.3969697  |            | 0.396969697 |             |  | 0.1918605 |           |
| ENSG00000049540 |            |            |            |             |             |  | 0.2159091 |           |
| ENSG00000122335 |            | 0.43333333 |            | 0.433333333 |             |  | 0.3068182 |           |
| ENSG00000125449 |            | 0.36363636 |            | 0.363636364 |             |  | 0.2823529 |           |
| ENSG00000107798 | 0.27844311 | 0.16091954 | 0.27844311 | 0.16091954  | 0.439759036 |  | 0.3662791 |           |
| ENSG00000197279 |            |            |            |             | 0.422619048 |  | 0.3895349 |           |
| ENSG00000196712 |            | 0.38484848 |            | 0.384848485 |             |  | 0.4883721 |           |
| ENSG00000080815 |            | 0.43333333 |            | 0.433333333 | 0.4         |  | 0.4545455 | 0.4767442 |
| ENSG00000124570 | 0.23952096 |            | 0.23952096 |             | 0.488095238 |  | 0.5       |           |
| ENSG00000116922 | 0.19886364 | 0.29192547 | 0.19886364 | 0.291925466 |             |  | 0.4878049 |           |
| ENSG00000138758 | 0.28443114 | 0.44047619 | 0.28443114 | 0.44047619  | 0.488095238 |  | 0.4883721 | 0.3139535 |
| ENSG00000257726 |            | 0.07055215 |            | 0.070552147 |             |  |           |           |
| ENSG00000198729 |            | 0.18484848 |            | 0.184848485 |             |  | 0.2411765 |           |
| ENSG00000204175 | 0.44444444 |            | 0.44444444 |             |             |  |           |           |
| ENSG00000101323 |            |            |            |             |             |  | 0.4651163 |           |
| ENSG00000188313 | 0.38023952 | 0.08888889 | 0.38023952 | 0.088888889 | 0.089285714 |  | 0.122093  |           |
| ENSG00000136352 |            |            |            |             | 0.2         |  | 0.3068182 |           |
| ENSG00000175348 | 0.08231707 | 0.17241379 | 0.08231707 | 0.172413793 |             |  | 0.4090909 |           |
| ENSG00000137877 |            | 0.47575758 |            | 0.475757576 |             |  | 0.3081395 |           |
| ENSG00000135269 |            | 0.3        |            | 0.3         |             |  | 0.4777778 |           |
| ENSG00000106571 |            | 0.34848485 |            | 0.348484848 |             |  | 0.4593023 |           |
| ENSG00000186919 |            | 0.11212121 |            | 0.112121212 |             |  | 0.2616279 |           |
| ENSG00000182308 |            | 0.22727273 |            | 0.227272727 |             |  |           |           |
| ENSG00000156261 | 0.29819277 |            | 0.29819277 |             | 0.192771084 |  | 0.2352941 |           |
| ENSG00000179083 |            |            |            |             |             |  | 0.0697674 |           |
| ENSG00000165338 | 0.35542169 |            | 0.35542169 |             | 0.09375     |  | 0.0941176 | 0.0872093 |
| ENSG00000176381 |            |            |            |             |             |  | 0.0872093 |           |
| ENSG00000111666 | 0.06886228 | 0.5        | 0.06886228 | 0.5         | 0.375       |  | 0.3430233 | 0.4090909 |
| ENSG00000196419 | 0.32335329 | 0.39634146 | 0.32335329 | 0.396341463 | 0.095238095 |  | 0.2209302 |           |
| ENSG00000124486 |            | 0.08588957 |            | 0.085889571 |             |  |           |           |
| ENSG00000125505 | 0.22674419 | 0.5        | 0.22674419 | 0.5         | 0.477777778 |  | 0.4772727 | 0.1453488 |
| ENSG00000100296 |            | 0.4054878  |            | 0.405487805 |             |  | 0.4767442 |           |
| ENSG00000119285 |            | 0.31818182 |            | 0.318181818 |             |  | 0.4360465 |           |
| ENSG00000110619 | 0.05120482 | 0.31818182 | 0.05120482 | 0.318181818 | 0.148809524 |  | 0.1046512 | 0.3       |
| ENSG00000144711 |            | 0.18484848 |            | 0.184848485 |             |  | 0.494186  |           |
| ENSG00000203727 |            | 0.42424242 |            | 0.424242424 |             |  | 0.3139535 |           |
| ENSG00000096996 | 0.10555556 |            | 0.10555556 |             |             |  | 0.2613636 |           |
| ENSG00000255561 |            | 0.32208589 |            | 0.32208589  |             |  | 0.1976744 |           |
| ENSG00000085872 |            | 0.34242424 |            | 0.342424242 |             |  | 0.1104651 |           |
| ENSG00000154864 |            | 0.44805195 |            | 0.448051948 |             |  | 0.4578313 |           |
| ENSG00000100147 |            |            |            |             | 0.083333333 |  |           |           |
| ENSG00000013503 | 0.31460674 | 0.21341463 | 0.31460674 | 0.213414634 |             |  | 0.0581395 | 0.3058824 |
| ENSG00000117226 |            | 0.48787879 |            | 0.487878788 |             |  | 0.4186047 |           |
| ENSG00000176274 |            | 0.44785276 |            | 0.447852761 |             |  | 0.494186  |           |
| ENSG00000196963 | 0.2994012  | 0.12424242 | 0.2994012  | 0.124242424 | 0.488095238 |  | 0.4534884 | 0.1337209 |
| ENSG00000111639 | 0.42215569 | 0.30606061 | 0.42215569 | 0.306060606 | 0.180722892 |  | 0.2613636 | 0.25      |
| ENSG00000198046 | 0.14071856 |            | 0.14071856 |             | 0.101190476 |  |           |           |
| ENSG00000164742 |            | 0.36969697 |            | 0.36969697  |             |  | 0.4127907 |           |
| ENSG00000109158 | 0.34730539 | 0.4969697  | 0.34730539 | 0.496969697 | 0.4         |  | 0.3529412 | 0.4111111 |

|                 |            |            |            |             |             |           |           |
|-----------------|------------|------------|------------|-------------|-------------|-----------|-----------|
| ENSG00000102962 |            | 0.14880952 |            | 0.148809524 |             |           | 0.1395349 |
| ENSG00000177508 | 0.11377246 |            | 0.11377246 |             | 0.416666667 | 0.494186  |           |
| ENSG00000256660 |            | 0.4556962  |            | 0.455696203 |             |           | 0.2409639 |
| ENSG00000170037 | 0.3742515  | 0.49390244 | 0.3742515  | 0.493902439 | 0.289156627 | 0.3430233 | 0.0697674 |
| ENSG00000174953 |            | 0.39393939 |            | 0.393939394 |             |           | 0.4767442 |
| ENSG00000125148 |            | 0.25       |            | 0.25        |             |           | 0.1931818 |
| ENSG00000122965 |            | 0.4969697  |            | 0.496969697 | 0.125       | 0.1818182 | 0.4883721 |
| ENSG00000225781 | 0.4760479  |            | 0.4760479  |             | 0.053571429 |           |           |
| ENSG00000106025 | 0.05988024 | 0.22727273 | 0.05988024 | 0.227272727 | 0.30952381  | 0.3197674 |           |
| ENSG00000125695 |            | 0.29268293 |            | 0.292682927 |             |           | 0.0523256 |
| ENSG00000186193 |            | 0.21036585 |            | 0.210365854 |             |           | 0.3430233 |
| ENSG00000167900 |            | 0.30981595 |            | 0.309815951 |             |           | 0.4593023 |
| ENSG00000161381 | 0.37125749 | 0.4969697  | 0.37125749 | 0.496969697 | 0.172619048 | 0.1162791 | 0.372093  |
| ENSG00000119725 | 0.5        | 0.39393939 | 0.5        | 0.393939394 | 0.377777778 | 0.4204545 | 0.3546512 |
| ENSG00000152601 |            | 0.2195122  |            | 0.219512195 |             |           | 0.25      |
| ENSG00000158805 |            | 0.45       |            | 0.45        |             |           | 0.1511628 |
| ENSG00000155926 | 0.46706587 | 0.46666667 | 0.46706587 | 0.466666667 | 0.433333333 | 0.3522727 | 0.2093023 |
| ENSG00000136247 | 0.39204545 |            | 0.39204545 |             | 0.211111111 | 0.1666667 |           |
| ENSG00000259642 |            | 0.26666667 |            | 0.266666667 |             |           | 0.2333333 |
| ENSG00000135740 |            | 0.11212121 |            | 0.112121212 |             |           |           |
| ENSG00000237693 | 0.48295455 |            | 0.48295455 |             | 0.422222222 | 0.3863636 | 0.3863636 |
| ENSG00000198901 |            | 0.26666667 |            | 0.266666667 |             |           |           |
| ENSG00000137968 | 0.39457831 | 0.37777778 | 0.39457831 | 0.377777778 | 0.053571429 |           | 0.125     |
| ENSG00000182263 |            | 0.29090909 |            | 0.290909091 |             |           | 0.4883721 |
| ENSG00000219200 |            | 0.15454545 |            | 0.154545455 |             |           | 0.1337209 |
| ENSG00000025039 |            | 0.36666667 |            | 0.366666667 |             |           | 0.4222222 |
| ENSG00000104369 |            | 0.24848485 |            | 0.248484848 |             |           | 0.1686047 |
| ENSG00000105374 | 0.35329341 | 0.43030303 | 0.35329341 | 0.43030303  |             |           | 0.1860465 |
| ENSG00000183765 | 0.27586207 |            | 0.27586207 |             | 0.388888889 | 0.3444444 |           |
| ENSG00000016082 | 0.33832335 |            | 0.33832335 |             | 0.083333333 | 0.1547619 |           |
| ENSG00000118513 |            | 0.44242424 |            | 0.442424242 |             |           | 0.3139535 |
| ENSG00000183837 |            | 0.41158537 |            | 0.411585366 |             |           | 0.4886364 |
| ENSG00000132437 | 0.375      | 0.08787879 | 0.375      | 0.087878788 | 0.470238095 | 0.4709302 |           |
| ENSG00000134461 |            | 0.15454545 |            | 0.154545455 |             |           | 0.1744186 |
| ENSG00000007312 |            | 0.36419753 |            | 0.364197531 |             |           | 0.4651163 |
| ENSG00000123600 | 0.10714286 |            | 0.10714286 |             |             |           |           |
| ENSG00000184330 | 0.40419162 | 0.08181818 | 0.40419162 | 0.081818182 | 0.18452381  | 0.0872093 | 0.0988372 |
| ENSG00000185070 |            | 0.30864198 |            | 0.308641975 |             |           | 0.4534884 |
| ENSG00000102230 | 0.05688623 | 0.40277778 | 0.05688623 | 0.402777778 | 0.273809524 | 0.2790698 | 0.4882353 |
| ENSG00000105135 | 0.42777778 | 0.46060606 | 0.42777778 | 0.460606061 | 0.455555556 | 0.4772727 | 0.3895349 |
| ENSG00000163466 | 0.07878788 |            | 0.07878788 |             | 0.410714286 | 0.3941176 |           |
| ENSG00000142347 |            | 0.22121212 |            | 0.221212121 |             |           | 0.1588235 |
| ENSG00000124449 |            | 0.16666667 |            | 0.166666667 |             |           | 0.1136364 |
| ENSG00000099954 |            | 0.48484848 |            | 0.484848485 |             |           | 0.3647059 |
| ENSG00000160193 |            | 0.45061728 |            | 0.450617284 |             |           | 0.4011628 |
| ENSG00000136436 | 0.15       | 0.37222222 | 0.15       | 0.372222222 |             |           | 0.1818182 |
| ENSG00000185684 | 0.21764706 | 0.11515152 | 0.21764706 | 0.115151515 | 0.175       | 0.25      | 0.1860465 |
| ENSG00000124103 | 0.11111111 |            | 0.11111111 |             | 0.355555556 | 0.2272727 |           |
| ENSG00000064999 | 0.35329341 | 0.14848485 | 0.35329341 | 0.148484848 | 0.458333333 | 0.4534884 | 0.2682927 |
| ENSG00000100711 |            | 0.38484848 |            | 0.384848485 |             |           | 0.3255814 |
| ENSG00000104894 |            | 0.22727273 |            | 0.227272727 | 0.232142857 | 0.1918605 | 0.1918605 |
| ENSG00000180138 | 0.41666667 | 0.37116564 | 0.41666667 | 0.371165644 | 0.208333333 | 0.2151163 | 0.2797619 |
| ENSG00000107807 | 0.25568182 | 0.35757576 | 0.25568182 | 0.357575758 | 0.30952381  | 0.3522727 | 0.3222222 |
| ENSG00000123989 | 0.33233533 | 0.5        | 0.33233533 | 0.5         | 0.380952381 | 0.2588235 | 0.255814  |

|                 |            |            |            |             |             |           |           |
|-----------------|------------|------------|------------|-------------|-------------|-----------|-----------|
| ENSG00000255837 |            | 0.35393258 |            | 0.353932584 |             |           | 0.2045455 |
| ENSG00000167778 |            | 0.08895706 |            | 0.088957055 |             |           | 0.2555556 |
| ENSG00000109272 |            |            |            |             | 0.416666667 | 0.3837209 |           |
| ENSG00000181291 |            | 0.37356322 |            | 0.373563218 |             |           | 0.0581395 |
| ENSG00000179636 |            | 0.34848485 |            | 0.348484848 |             |           | 0.4534884 |
| ENSG00000082126 |            | 0.49393939 |            | 0.493939394 |             |           | 0.4352941 |
| ENSG00000214900 | 0.39820359 | 0.25757576 | 0.39820359 | 0.257575758 | 0.19047619  | 0.1162791 |           |
| ENSG00000143466 | 0.2005988  | 0.45151515 | 0.2005988  | 0.451515152 |             | 0.0697674 | 0.4011628 |
| ENSG00000235098 | 0.2875     |            | 0.2875     |             | 0.084337349 | 0.1860465 |           |
| ENSG00000158458 |            | 0.09090909 |            | 0.090909091 |             |           |           |
| ENSG00000186834 | 0.26136364 | 0.0969697  | 0.26136364 | 0.096969697 | 0.366666667 | 0.3181818 | 0.3255814 |
| ENSG00000187527 | 0.36227545 |            | 0.36227545 |             | 0.136904762 | 0.2916667 |           |
| ENSG00000141448 |            | 0.41111111 |            | 0.411111111 |             |           | 0.3522727 |
| ENSG00000085552 | 0.28443114 | 0.42352941 | 0.28443114 | 0.423529412 | 0.148809524 | 0.122093  | 0.2317073 |
| ENSG00000186687 |            | 0.17575758 |            | 0.175757576 |             |           | 0.1058824 |
| ENSG00000175662 |            | 0.33333333 |            | 0.333333333 |             |           | 0.0697674 |
| ENSG00000108100 | 0.36826347 | 0.32424242 | 0.36826347 | 0.324242424 | 0.420731707 | 0.3764706 | 0.3764706 |
| ENSG00000166157 |            | 0.12337662 |            | 0.123376623 |             |           | 0.1511628 |
| ENSG00000213762 | 0.11445783 | 0.12804878 | 0.11445783 | 0.12804878  | 0.168674699 | 0.122093  | 0.2325581 |
| ENSG00000130768 | 0.31460674 | 0.3        | 0.31460674 | 0.3         |             |           | 0.2906977 |
| ENSG00000103343 | 0.30838323 |            | 0.30838323 |             | 0.125       | 0.1453488 |           |
| ENSG00000110203 |            | 0.05757576 |            | 0.057575758 |             |           |           |
| ENSG00000146414 | 0.43413174 | 0.48333333 | 0.43413174 | 0.483333333 | 0.234939759 | 0.3554217 | 0.3977273 |
| ENSG00000128268 |            | 0.1969697  |            | 0.196969697 |             |           | 0.1627907 |
| ENSG00000140832 |            | 0.26060606 |            | 0.260606061 |             |           |           |
| ENSG00000140534 |            | 0.45454545 |            | 0.454545455 |             |           | 0.3809524 |
| ENSG00000108753 |            | 0.44444444 |            | 0.444444444 |             |           | 0.4888889 |
| ENSG00000204398 |            | 0.41212121 |            | 0.412121212 |             |           | 0.4709302 |
| ENSG00000148702 | 0.22222222 | 0.1        | 0.22222222 | 0.1         | 0.166666667 | 0.1931818 | 0.0872093 |
| ENSG00000205927 | 0.12275449 | 0.08787879 | 0.12275449 | 0.087878788 | 0.345238095 | 0.3953488 | 0.1337209 |
| ENSG00000144228 |            | 0.12777778 |            | 0.127777778 |             |           | 0.3192771 |
| ENSG00000211455 |            | 0.42424242 |            | 0.424242424 |             |           | 0.3546512 |
| ENSG00000122971 |            | 0.3030303  |            | 0.303030303 |             |           | 0.2559524 |
| ENSG00000088827 |            | 0.42424242 |            | 0.424242424 |             |           | 0.4593023 |
| ENSG00000048405 | 0.37951807 | 0.10365854 | 0.37951807 | 0.103658537 | 0.166666667 | 0.1477273 |           |
| ENSG00000163811 | 0.43888889 | 0.29444444 | 0.43888889 | 0.294444444 | 0.220238095 | 0.2352941 | 0.2383721 |
| ENSG00000156269 |            | 0.45555556 |            | 0.455555556 |             |           | 0.1555556 |
| ENSG00000129538 |            |            |            |             |             |           | 0.0666667 |
| ENSG00000145331 | 0.20359281 | 0.25454545 | 0.20359281 | 0.254545455 | 0.113095238 | 0.1569767 | 0.4302326 |
| ENSG00000155256 | 0.2754491  | 0.20689655 | 0.2754491  | 0.206896552 | 0.339285714 | 0.3647059 | 0.4431818 |
| ENSG00000101076 |            | 0.13190184 |            | 0.13190184  |             |           | 0.4069767 |
| ENSG00000139190 | 0.46629213 | 0.47575758 | 0.46629213 | 0.475757576 | 0.441860465 | 0.3555556 | 0.3777778 |
| ENSG00000166411 | 0.19461078 | 0.42424242 | 0.19461078 | 0.424242424 | 0.273809524 | 0.2790698 | 0.2       |
| ENSG00000078808 |            | 0.1030303  |            | 0.103030303 |             |           | 0.2093023 |
| ENSG00000196757 |            |            |            |             |             | 0.0833333 |           |
| ENSG00000186235 | 0.06547619 |            | 0.06547619 |             | 0.107142857 | 0.122093  |           |
| ENSG00000115419 |            | 0.428125   |            | 0.428125    |             |           | 0.1705882 |
| ENSG00000100565 | 0.38622754 | 0.34545455 | 0.38622754 | 0.345454545 |             |           | 0.0988372 |
| ENSG00000109618 |            | 0.48484848 |            | 0.484848485 |             |           | 0.2093023 |
| ENSG00000185344 | 0.41011236 | 0.42528736 | 0.41011236 | 0.425287356 | 0.083333333 |           |           |
| ENSG00000130175 |            | 0.08536585 |            | 0.085365854 |             |           | 0.0872093 |
| ENSG00000007168 |            | 0.06969697 |            | 0.06969697  |             |           | 0.1627907 |
| ENSG00000244462 |            | 0.18484848 |            | 0.184848485 |             |           | 0.1511628 |
| ENSG00000170191 | 0.49425287 | 0.43678161 | 0.49425287 | 0.436781609 |             | 0.0681818 | 0.4186047 |

|                 |            |            |            |             |             |           |           |
|-----------------|------------|------------|------------|-------------|-------------|-----------|-----------|
| ENSG00000125255 | 0.21556886 | 0.46111111 | 0.21556886 | 0.46111111  | 0.113095238 | 0.0581395 | 0.3977273 |
| ENSG00000118620 |            | 0.20786517 |            | 0.207865169 | 0.11111111  | 0.2386364 |           |
| ENSG00000091592 | 0.14670659 | 0.44242424 | 0.14670659 | 0.442424242 |             |           | 0.1477273 |
| ENSG00000204767 |            |            |            |             |             | 0.0639535 |           |
| ENSG00000099365 |            | 0.36111111 |            | 0.36111111  |             |           | 0.1136364 |
| ENSG00000105364 |            | 0.45987654 |            | 0.459876543 |             |           | 0.4702381 |
| ENSG00000173992 |            |            |            |             | 0.130952381 | 0.0882353 |           |
| ENSG00000136122 |            | 0.36969697 |            | 0.36969697  |             |           | 0.1744186 |
| ENSG00000115295 | 0.10179641 | 0.36666667 | 0.10179641 | 0.366666667 |             |           | 0.3546512 |
| ENSG00000134760 |            | 0.25304878 |            | 0.25304878  |             |           | 0.1104651 |
| ENSG00000132199 | 0.11377246 | 0.35889571 | 0.11377246 | 0.358895706 |             |           | 0.3470588 |
| ENSG00000166363 |            | 0.3030303  |            | 0.303030303 |             |           | 0.3647059 |
| ENSG00000176715 |            | 0.07575758 |            | 0.075757576 |             |           | 0.3546512 |
| ENSG00000060491 | 0.46590909 | 0.39393939 | 0.46590909 | 0.393939394 | 0.41111111  | 0.3409091 | 0.3197674 |
| ENSG00000103653 |            | 0.26363636 |            | 0.263636364 |             |           | 0.4764706 |
| ENSG00000138592 |            |            |            |             | 0.466666667 | 0.2613636 | 0.1627907 |
| ENSG00000070614 | 0.12650602 | 0.49393939 | 0.12650602 | 0.493939394 | 0.168674699 | 0.2647059 | 0.3372093 |
| ENSG00000164604 | 0.23952096 | 0.48181818 | 0.23952096 | 0.481818182 |             |           | 0.0639535 |
| ENSG00000213047 |            | 0.44817073 |            | 0.448170732 |             |           | 0.3058824 |
| ENSG00000109534 |            | 0.35393258 |            | 0.353932584 |             |           |           |
| ENSG00000187815 | 0.15555556 |            | 0.15555556 |             |             |           |           |
| ENSG00000185278 | 0.36227545 | 0.35555556 | 0.36227545 | 0.355555556 |             |           | 0.5       |
| ENSG00000170426 |            | 0.14110429 |            | 0.141104294 |             |           | 0.1860465 |
| ENSG00000172350 | 0.0508982  | 0.07621951 | 0.0508982  | 0.076219512 |             |           | 0.1337209 |
| ENSG00000108439 |            | 0.33636364 |            | 0.336363636 |             |           | 0.4476744 |
| ENSG00000164609 | 0.4        | 0.23809524 | 0.4        | 0.238095238 | 0.160714286 | 0.2151163 | 0.1477273 |
| ENSG00000217455 | 0.47005988 | 0.1        | 0.47005988 | 0.1         | 0.089285714 | 0.1686047 |           |
| ENSG00000151116 |            | 0.14545455 |            | 0.145454545 | 0.273809524 | 0.3488372 | 0.3352941 |
| ENSG00000169057 |            | 0.2030303  |            | 0.203030303 |             |           | 0.2325581 |
| ENSG00000162599 |            |            |            |             |             |           | 0.0639535 |
| ENSG00000205730 |            |            |            |             |             |           | 0.1818182 |
| ENSG00000119411 |            | 0.32727273 |            | 0.327272727 |             |           | 0.3372093 |
| ENSG00000173175 | 0.2245509  | 0.25151515 | 0.2245509  | 0.251515152 | 0.422619048 | 0.4244186 |           |
| ENSG00000163209 | 0.46022727 | 0.5        | 0.46022727 | 0.5         | 0.377777778 | 0.3181818 | 0.3181818 |
| ENSG00000184678 |            | 0.12424242 |            | 0.124242424 |             |           |           |
| ENSG00000120784 |            | 0.18292683 |            | 0.182926829 | 0.06547619  |           | 0.3313953 |
| ENSG00000167513 |            | 0.21590909 |            | 0.215909091 |             |           | 0.4888889 |
| ENSG00000139998 |            | 0.33939394 |            | 0.339393939 |             |           | 0.4244186 |
| ENSG00000170477 |            | 0.16158537 |            | 0.161585366 |             |           | 0.0988372 |
| ENSG00000130299 |            | 0.15337423 |            | 0.153374233 |             |           | 0.1453488 |
| ENSG00000144648 |            | 0.41515152 |            | 0.415151515 |             |           | 0.3662791 |
| ENSG00000066336 |            | 0.35632184 |            | 0.356321839 |             |           | 0.4883721 |
| ENSG00000169896 |            | 0.33333333 |            | 0.333333333 |             |           | 0.2857143 |
| ENSG00000088812 |            | 0.43333333 |            | 0.433333333 |             |           | 0.494186  |
| ENSG00000168453 | 0.28614458 | 0.40606061 | 0.28614458 | 0.406060606 | 0.351190476 | 0.4302326 | 0.3953488 |
| ENSG00000164136 | 0.44311377 | 0.44242424 | 0.44311377 | 0.442424242 | 0.488372093 | 0.494186  | 0.4883721 |
| ENSG00000165195 |            | 0.35555556 |            | 0.355555556 |             |           | 0.3214286 |
| ENSG00000189056 | 0.30337079 |            | 0.30337079 |             | 0.166666667 | 0.1705882 |           |
| ENSG00000139767 | 0.45454545 | 0.46969697 | 0.45454545 | 0.46969697  | 0.233333333 | 0.3295455 | 0.4476744 |
| ENSG00000254671 |            | 0.06363636 |            | 0.063636364 |             |           |           |
| ENSG00000160882 |            | 0.4847561  |            | 0.484756098 |             |           | 0.1764706 |
| ENSG00000066583 |            | 0.38484848 |            | 0.384848485 |             |           | 0.1337209 |
| ENSG00000172201 |            | 0.33030303 |            | 0.33030303  |             |           | 0.1686047 |
| ENSG00000166118 |            | 0.28484848 |            | 0.284848485 |             |           | 0.3882353 |

|                 |            |            |            |             |             |           |           |
|-----------------|------------|------------|------------|-------------|-------------|-----------|-----------|
| ENSG0000035403  | 0.25748503 | 0.22222222 | 0.25748503 | 0.22222222  | 0.226190476 | 0.2674419 | 0.4886364 |
| ENSG00000168329 |            | 0.26363636 |            | 0.263636364 |             |           | 0.0639535 |
| ENSG00000164440 |            | 0.20689655 |            | 0.206896552 |             |           | 0.1625    |
| ENSG00000256349 |            | 0.41463415 |            | 0.414634146 |             |           | 0.4823529 |
| ENSG00000063438 |            | 0.40804598 |            | 0.408045977 |             |           | 0.4772727 |
| ENSG00000055332 | 0.07784431 | 0.3625     | 0.07784431 | 0.3625      | 0.273809524 | 0.1569767 | 0.2529412 |
| ENSG00000055813 | 0.31437126 | 0.32727273 | 0.31437126 | 0.327272727 | 0.136904762 | 0.0872093 | 0.1569767 |
| ENSG00000173221 |            | 0.37658228 |            | 0.376582278 |             |           | 0.3636364 |
| ENSG00000073350 | 0.48203593 | 0.35757576 | 0.48203593 | 0.357575758 | 0.160714286 | 0.1569767 | 0.1453488 |
| ENSG00000163885 |            | 0.0969697  |            | 0.096969697 |             |           |           |
| ENSG00000163935 | 0.17333333 | 0.37777778 | 0.17333333 | 0.377777778 | 0.077380952 |           | 0.4069767 |
| ENSG00000111335 |            | 0.39634146 |            | 0.396341463 |             |           | 0.4767442 |
| ENSG00000170442 |            | 0.43820225 |            | 0.438202247 |             |           | 0.4318182 |
| ENSG00000164347 | 0.36666667 |            | 0.36666667 |             | 0.170454545 | 0.1666667 |           |
| ENSG00000213585 |            | 0.37222222 |            | 0.372222222 |             |           | 0.3409091 |
| ENSG00000185650 | 0.36826347 | 0.48484848 | 0.36826347 | 0.484848485 | 0.273809524 | 0.2882353 | 0.2906977 |
| ENSG00000143458 |            | 0.1969697  |            | 0.196969697 |             |           | 0.1058824 |
| ENSG00000155858 |            | 0.41111111 |            | 0.411111111 |             |           | 0.494186  |
| ENSG00000231924 | 0.09638554 | 0.12345679 | 0.09638554 | 0.12345679  |             |           | 0.3430233 |
| ENSG00000170949 | 0.40740741 | 0.3597561  | 0.40740741 | 0.359756098 | 0.2         | 0.2       | 0.3888889 |
| ENSG00000124191 | 0.25149701 |            | 0.25149701 |             | 0.44047619  | 0.4069767 |           |
| ENSG00000169814 | 0.08536585 | 0.08231707 | 0.08536585 | 0.082317073 | 0.339285714 | 0.3352941 | 0.3352941 |
| ENSG00000061987 |            | 0.36969697 |            | 0.36969697  |             |           | 0.3780488 |
| ENSG00000130635 | 0.25       | 0.4375     | 0.25       | 0.4375      | 0.130952381 | 0.1104651 | 0.4647059 |
| ENSG00000179889 |            | 0.29393939 |            | 0.293939394 |             |           | 0.4761905 |
| ENSG00000136295 |            | 0.16463415 |            | 0.164634146 |             |           | 0.122093  |
| ENSG00000131495 | 0.29341317 |            | 0.29341317 |             | 0.457831325 | 0.4647059 |           |
| ENSG00000104722 | 0.0625     | 0.16459627 | 0.0625     | 0.164596273 | 0.433333333 | 0.4090909 | 0.3895349 |
| ENSG00000136279 |            | 0.21779141 |            | 0.217791411 |             |           | 0.1046512 |
| ENSG00000010404 | 0.28484848 | 0.47777778 | 0.28484848 | 0.477777778 |             |           | 0.1411765 |
| ENSG00000148358 |            | 0.46363636 |            | 0.463636364 |             |           | 0.372093  |
| ENSG00000172375 |            | 0.46060606 |            | 0.460606061 |             |           | 0.3023256 |
| ENSG00000145740 |            | 0.47222222 |            | 0.472222222 |             |           | 0.494186  |
| ENSG00000140403 |            | 0.43636364 |            | 0.436363636 |             |           | 0.3895349 |
| ENSG00000197182 | 0.06325301 | 0.31818182 | 0.06325301 | 0.318181818 | 0.148809524 | 0.2034884 | 0.0697674 |
| ENSG00000129292 | 0.5        | 0.42777778 | 0.5        | 0.427777778 | 0.357142857 | 0.4302326 | 0.3719512 |
| ENSG00000204001 | 0.30838323 |            | 0.30838323 |             | 0.297619048 | 0.2034884 |           |
| ENSG00000163138 | 0.22777778 |            | 0.22777778 |             |             |           |           |
| ENSG00000110514 | 0.45808383 |            | 0.45808383 |             | 0.369047619 | 0.297619  |           |
| ENSG00000117091 |            | 0.18787879 |            | 0.187878788 |             |           | 0.4360465 |
| ENSG00000184647 |            | 0.33939394 |            | 0.339393939 |             |           | 0.4011628 |
| ENSG00000177461 | 0.1497006  | 0.2969697  | 0.1497006  | 0.296969697 |             |           | 0.3895349 |
| ENSG00000162148 | 0.21348315 |            | 0.21348315 |             |             |           |           |
| ENSG00000229415 |            | 0.11212121 |            | 0.112121212 |             |           |           |
| ENSG00000177732 |            | 0.1        |            | 0.1         |             |           | 0.1704545 |
| ENSG00000149428 | 0.10778443 | 0.49418605 | 0.10778443 | 0.494186047 |             |           | 0.3895349 |
| ENSG00000128284 | 0.37048193 | 0.48837209 | 0.37048193 | 0.488372093 | 0.351190476 | 0.4418605 | 0.4418605 |
| ENSG00000160683 |            | 0.39329268 |            | 0.393292683 | 0.125       | 0.1444444 | 0.2325581 |
| ENSG00000091656 | 0.35928144 | 0.43820225 | 0.35928144 | 0.438202247 | 0.416666667 | 0.4244186 | 0.3181818 |
| ENSG00000149403 |            | 0.38505747 |            | 0.385057471 |             |           | 0.4777778 |
| ENSG00000168004 | 0.39820359 | 0.08181818 | 0.39820359 | 0.081818182 | 0.166666667 | 0.1590909 | 0.1395349 |
| ENSG00000164764 |            | 0.23636364 |            | 0.236363636 |             |           | 0.0930233 |
| ENSG00000171804 | 0.4251497  |            | 0.4251497  |             | 0.428571429 | 0.4186047 |           |
| ENSG00000130699 |            | 0.06289308 |            | 0.062893082 |             |           |           |

|                 |            |            |            |             |             |           |           |
|-----------------|------------|------------|------------|-------------|-------------|-----------|-----------|
| ENSG00000108406 | 0.09090909 |            | 0.09090909 |             |             |           |           |
| ENSG00000113263 |            | 0.12727273 |            | 0.127272727 |             |           | 0.3837209 |
| ENSG00000253190 | 0.08333333 |            | 0.08333333 |             |             |           |           |
| ENSG00000249992 |            | 0.17177914 |            | 0.171779141 |             |           | 0.2228916 |
| ENSG00000204361 |            | 0.37209302 |            | 0.372093023 |             |           | 0.3953488 |
| ENSG00000105707 |            | 0.35151515 |            | 0.351515152 |             |           | 0.2906977 |
| ENSG00000034971 | 0.09580838 |            | 0.09580838 |             |             |           |           |
| ENSG00000118242 |            | 0.40909091 |            | 0.409090909 |             |           | 0.2529412 |
| ENSG00000145819 |            | 0.49393939 |            | 0.493939394 | 0.464285714 | 0.4127907 | 0.3895349 |
| ENSG00000154438 |            | 0.10909091 |            | 0.109090909 |             |           | 0.3604651 |
| ENSG00000163067 |            | 0.26969697 |            | 0.26969697  |             |           | 0.2857143 |
| ENSG00000175595 |            | 0.32515337 |            | 0.325153374 |             |           | 0.3222222 |
| ENSG00000173546 |            | 0.47256098 |            | 0.472560976 |             |           | 0.2848837 |
| ENSG00000213401 | 0.07575758 | 0.43902439 | 0.07575758 | 0.43902439  |             |           | 0.2674419 |
| ENSG00000124466 | 0.23888889 |            | 0.23888889 |             | 0.38372093  | 0.3295455 |           |
| ENSG00000105643 |            | 0.28484848 |            | 0.284848485 |             |           | 0.1647059 |
| ENSG00000083845 |            | 0.43888889 |            | 0.438888889 |             |           | 0.4880952 |
| ENSG00000211448 |            | 0.40606061 |            | 0.406060606 | 0.130952381 | 0.1686047 | 0.4418605 |
| ENSG00000157796 |            | 0.33888889 |            | 0.338888889 |             |           | 0.1477273 |
| ENSG00000125124 | 0.19444444 |            | 0.19444444 |             |             |           |           |
| ENSG00000170178 |            | 0.34545455 |            | 0.345454545 |             |           |           |
| ENSG00000177119 |            | 0.08888889 |            | 0.088888889 |             |           | 0.3522727 |
| ENSG00000106153 |            | 0.17816092 |            | 0.17816092  | 0.091463415 | 0.0681818 | 0.0681818 |
| ENSG00000170242 | 0.17664671 | 0.46666667 | 0.17664671 | 0.466666667 | 0.166666667 | 0.1104651 | 0.3662791 |
| ENSG00000087338 |            | 0.5        |            | 0.5         |             |           | 0.3235294 |
| ENSG00000146192 | 0.31818182 | 0.47256098 | 0.31818182 | 0.472560976 | 0.411111111 | 0.4204545 | 0.5       |
| ENSG00000084754 |            | 0.19393939 |            | 0.193939394 |             |           | 0.1104651 |
| ENSG00000132382 | 0.14772727 |            | 0.14772727 |             |             |           |           |
| ENSG00000021355 |            | 0.23291925 |            | 0.232919255 |             |           | 0.2831325 |
| ENSG00000136381 | 0.13772455 | 0.39090909 | 0.13772455 | 0.390909091 |             |           | 0.5       |
| ENSG00000138035 |            | 0.48787879 |            | 0.487878788 |             |           | 0.1818182 |
| ENSG00000105967 |            | 0.17878788 |            | 0.178787879 |             |           | 0.3255814 |
| ENSG00000213203 |            | 0.13333333 |            | 0.133333333 |             |           | 0.2444444 |
| ENSG00000157240 |            | 0.14242424 |            | 0.142424242 |             |           | 0.2383721 |
| ENSG00000163406 | 0.06886228 | 0.2347561  | 0.06886228 | 0.234756098 | 0.083333333 | 0.0697674 | 0.0639535 |
| ENSG00000069509 | 0.19631902 |            | 0.19631902 |             |             |           |           |
| ENSG00000140382 |            | 0.41717791 |            | 0.417177914 |             |           | 0.1686047 |
| ENSG00000119537 |            | 0.46060606 |            | 0.460606061 |             |           | 0.3235294 |
| ENSG00000108604 |            | 0.37878788 |            | 0.378787879 |             |           | 0.4011628 |
| ENSG00000158485 |            | 0.13030303 |            | 0.13030303  |             |           | 0.3255814 |
| ENSG00000116095 |            | 0.33939394 |            | 0.339393939 |             |           | 0.3882353 |
| ENSG00000184566 | 0.31437126 | 0.22727273 | 0.31437126 | 0.227272727 | 0.297619048 | 0.3546512 | 0.1453488 |
| ENSG00000143409 | 0.30239521 |            | 0.30239521 |             | 0.208333333 | 0.1104651 |           |
| ENSG00000163762 |            | 0.48787879 |            | 0.487878788 |             |           | 0.2222222 |
| ENSG00000178636 |            | 0.28484848 |            | 0.284848485 |             |           | 0.5       |
| ENSG00000188655 | 0.41515152 | 0.19090909 | 0.41515152 | 0.190909091 | 0.101190476 | 0.0639535 | 0.3372093 |
| ENSG00000100997 |            | 0.45555556 |            | 0.455555556 |             |           | 0.0795455 |
| ENSG00000156928 |            | 0.10060976 |            | 0.100609756 |             |           | 0.0813953 |
| ENSG00000175893 |            | 0.47515528 |            | 0.47515528  |             |           | 0.3953488 |
| ENSG00000162543 |            | 0.21212121 |            | 0.212121212 |             |           | 0.4186047 |
| ENSG00000183206 |            | 0.21111111 |            | 0.211111111 |             |           | 0.4545455 |
| ENSG00000112305 |            | 0.42121212 |            | 0.421212121 |             |           | 0.2616279 |
| ENSG00000100505 |            | 0.42857143 |            | 0.428571429 |             |           | 0.3863636 |
| ENSG00000108294 | 0.39520958 |            | 0.39520958 |             | 0.113095238 | 0.0639535 |           |

|                 |            |            |            |             |             |  |                     |
|-----------------|------------|------------|------------|-------------|-------------|--|---------------------|
| ENSG00000115207 | 0.32035928 |            | 0.32035928 |             | 0.125       |  | 0.0930233           |
| ENSG00000171243 | 0.06586826 |            | 0.06586826 |             | 0.077380952 |  | 0.0523256           |
| ENSG00000246223 |            | 0.44171779 |            | 0.441717791 |             |  | 0.4593023           |
| ENSG00000188649 | 0.38554217 | 0.06969697 | 0.38554217 | 0.06969697  | 0.180722892 |  | 0.25                |
| ENSG00000138271 | 0.44311377 | 0.23636364 | 0.44311377 | 0.236363636 | 0.380952381 |  | 0.4470588 0.1453488 |
| ENSG00000120088 |            | 0.21036585 |            | 0.210365854 | 0.077380952 |  | 0.0639535           |
| ENSG00000159592 | 0.21856287 |            | 0.21856287 |             | 0.363095238 |  | 0.2790698           |
| ENSG00000082438 |            | 0.46969697 |            | 0.46969697  |             |  | 0.0697674           |
| ENSG00000164808 | 0.16111111 |            | 0.16111111 |             | 0.155555556 |  | 0.2159091 0.1511628 |
| ENSG00000239264 |            | 0.15408805 |            | 0.15408805  |             |  | 0.0639535           |
| ENSG00000065883 |            | 0.16060606 |            | 0.160606061 |             |  | 0.2790698           |
| ENSG00000169217 |            | 0.36363636 |            | 0.363636364 |             |  | 0.127907            |
| ENSG00000143379 |            | 0.37575758 |            | 0.375757576 |             |  | 0.4761905           |
| ENSG00000134419 | 0.08682635 |            | 0.08682635 |             |             |  |                     |
| ENSG00000103540 |            | 0.07222222 |            | 0.07222222  |             |  |                     |
| ENSG00000204387 | 0.21856287 | 0.14242424 | 0.21856287 | 0.142424242 | 0.233333333 |  | 0.3139535 0.2674419 |
| ENSG00000164649 |            | 0.36969697 |            | 0.36969697  |             |  | 0.1162791           |
| ENSG00000145244 |            | 0.32424242 |            | 0.324242424 |             |  | 0.4761905           |
| ENSG00000196132 | 0.0988024  | 0.43597561 | 0.0988024  | 0.43597561  | 0.369047619 |  | 0.4709302 0.0988372 |
| ENSG00000115694 | 0.25449102 | 0.37222222 | 0.25449102 | 0.372222222 | 0.255952381 |  | 0.1976744 0.3117647 |
| ENSG00000109787 |            | 0.4        |            | 0.4         |             |  | 0.3470588           |
| ENSG00000148925 |            | 0.18292683 |            | 0.182926829 |             |  | 0.2325581           |
| ENSG00000197345 |            | 0.26380368 |            | 0.263803681 |             |  | 0.3035714           |
| ENSG00000088756 | 0.40718563 | 0.3030303  | 0.40718563 | 0.303030303 | 0.2         |  | 0.0777778 0.3511905 |
| ENSG00000180081 |            | 0.08484848 |            | 0.084848485 |             |  | 0.127907            |
| ENSG00000125870 | 0.23952096 | 0.34848485 | 0.23952096 | 0.348484848 | 0.238095238 |  | 0.2823529 0.3313953 |
| ENSG00000186354 | 0.13772455 | 0.49085366 | 0.13772455 | 0.490853659 |             |  | 0.3176471           |
| ENSG00000197429 |            | 0.37777778 |            | 0.377777778 |             |  | 0.3181818           |
| ENSG00000065717 |            | 0.16363636 |            | 0.163636364 |             |  | 0.3255814           |
| ENSG00000181541 |            | 0.07865169 |            | 0.078651685 |             |  | 0.1931818           |
| ENSG00000198346 |            | 0.46969697 |            | 0.46969697  |             |  | 0.3111111           |
| ENSG00000203987 | 0.17664671 | 0.43939394 | 0.17664671 | 0.439393939 | 0.380952381 |  | 0.4476744 0.4476744 |
| ENSG00000179922 |            | 0.21818182 |            | 0.218181818 |             |  | 0.2093023           |
| ENSG00000143970 |            | 0.24848485 |            | 0.248484848 |             |  | 0.2                 |
| ENSG00000173285 | 0.28614458 | 0.32621951 | 0.28614458 | 0.326219512 | 0.375       |  | 0.4360465 0.4352941 |
| ENSG00000058668 | 0.42814371 | 0.44207317 | 0.42814371 | 0.442073171 | 0.404761905 |  | 0.3546512 0.4882353 |
| ENSG00000049323 |            | 0.42944785 |            | 0.429447853 |             |  | 0.4883721           |
| ENSG00000134571 |            |            |            |             |             |  | 0.0568182           |
| ENSG00000176641 |            | 0.42682927 |            | 0.426829268 |             |  | 0.2732558           |
| ENSG00000169727 |            | 0.33908046 |            | 0.33908046  |             |  | 0.4090909           |
| ENSG00000184232 |            | 0.15517241 |            | 0.155172414 |             |  | 0.1022727           |
| ENSG00000116721 |            | 0.28735632 |            | 0.287356322 |             |  |                     |
| ENSG00000104907 | 0.19461078 |            | 0.19461078 |             |             |  | 0.0523256           |
| ENSG00000163554 |            | 0.3969697  |            | 0.396969697 |             |  | 0.4186047           |
| ENSG00000204438 | 0.26111111 | 0.22727273 | 0.26111111 | 0.227272727 | 0.156626506 |  | 0.244186 0.4302326  |
| ENSG00000109861 | 0.10542169 | 0.21341463 | 0.10542169 | 0.213414634 |             |  | 0.4470588           |
| ENSG00000142892 |            | 0.41515152 |            | 0.415151515 |             |  | 0.5                 |
| ENSG00000087263 |            | 0.34545455 |            | 0.345454545 |             |  | 0.3809524           |
| ENSG00000111224 |            | 0.38505747 |            | 0.385057471 |             |  | 0.4090909           |
| ENSG00000100445 | 0.47005988 | 0.1030303  | 0.47005988 | 0.103030303 | 0.125       |  | 0.2034884 0.2034884 |
| ENSG00000203859 |            | 0.13888889 |            | 0.138888889 |             |  | 0.3837209           |
| ENSG00000170396 | 0.21666667 |            | 0.21666667 |             | 0.2         |  | 0.0795455           |
| ENSG00000244242 | 0.4251497  | 0.26966292 | 0.4251497  | 0.269662921 | 0.18452381  |  | 0.1976744 0.2840909 |
| ENSG00000152292 | 0.22777778 |            | 0.22777778 |             | 0.4         |  | 0.4166667           |



|                 |            |            |            |            |             |           |           |
|-----------------|------------|------------|------------|------------|-------------|-----------|-----------|
| ENSG00000139304 | 0.38414634 | 0.40555556 | 0.38414634 | 0.40555556 | 0.255952381 | 0.2732558 | 0.255814  |
| ENSG00000184613 | 0.2826087  | 0.22424242 | 0.2826087  | 0.22424242 | 0.44375     | 0.5       | 0.4058824 |
| ENSG00000236756 |            | 0.06060606 |            | 0.06060606 |             |           | 0.3181818 |
| ENSG00000171360 |            | 0.29393939 |            | 0.29393939 |             |           | 0.0581395 |
| ENSG00000105426 |            | 0.31212121 |            | 0.31212121 |             |           | 0.3895349 |
| ENSG00000164830 | 0.16766467 | 0.41515152 | 0.16766467 | 0.41515152 | 0.375       | 0.3837209 | 0.3869048 |
| ENSG00000174238 |            | 0.20606061 |            | 0.20606060 |             |           | 0.1395349 |
| ENSG00000123240 |            |            |            |            | 0.172619048 | 0.1511628 |           |
| ENSG00000157765 |            | 0.43939394 |            | 0.43939393 |             |           | 0.3176471 |
| ENSG00000181631 |            | 0.30909091 |            | 0.30909090 |             |           | 0.2965116 |
| ENSG00000138593 | 0.18862275 | 0.36280488 | 0.18862275 | 0.36280487 | 0.386904762 | 0.3023256 | 0.2616279 |
| ENSG00000119979 |            | 0.24846626 |            | 0.24846625 |             |           |           |
| ENSG00000019995 |            | 0.25454545 |            | 0.25454545 |             |           | 0.3139535 |
| ENSG00000179240 | 0.16467066 | 0.23333333 | 0.16467066 | 0.23333333 | 0.101190476 | 0.0755814 | 0.4642857 |
| ENSG00000005421 | 0.43902439 | 0.32424242 | 0.43902439 | 0.32424242 | 0.133333333 | 0.1222222 | 0.4418605 |
| ENSG00000204711 |            | 0.38333333 |            | 0.38333333 |             |           | 0.3095238 |
| ENSG00000124788 |            | 0.31707317 |            | 0.31707317 |             |           | 0.5       |
| ENSG00000122548 |            | 0.41515152 |            | 0.41515152 |             |           | 0.2848837 |
| ENSG00000165072 |            |            |            |            |             |           | 0.4545455 |
| ENSG00000138138 | 0.42222222 | 0.29447853 | 0.42222222 | 0.29447852 | 0.122222222 | 0.1777778 | 0.1566265 |
| ENSG00000242265 |            | 0.29090909 |            | 0.29090909 |             |           | 0.2470588 |
| ENSG00000138587 | 0.18263473 |            | 0.18263473 |            |             |           |           |
| ENSG00000139292 |            | 0.20121951 |            | 0.20121952 |             |           | 0.4186047 |
| ENSG00000172059 |            | 0.49367089 |            | 0.49367088 |             |           | 0.3       |
| ENSG00000112936 |            | 0.37962963 |            | 0.37962963 |             |           | 0.3058824 |
| ENSG00000134057 | 0.48203593 |            | 0.48203593 |            | 0.428571429 | 0.3895349 |           |
| ENSG00000204278 |            | 0.09146341 |            | 0.09146345 |             |           | 0.2209302 |
| ENSG00000120992 | 0.12275449 |            | 0.12275449 |            | 0.214285714 | 0.3197674 |           |
| ENSG00000122728 |            |            |            |            |             |           | 0.2616279 |
| ENSG00000115761 |            | 0.08823529 |            | 0.08823529 |             |           | 0.3690476 |
| ENSG00000037241 | 0.19760479 | 0.06818182 | 0.19760479 | 0.06818182 |             |           |           |
| ENSG00000182782 |            | 0.42777778 |            | 0.42777778 |             |           | 0.4593023 |
| ENSG00000123307 |            | 0.25925926 |            | 0.25925925 |             |           | 0.3809524 |
| ENSG00000117713 |            | 0.07272727 |            | 0.07272723 |             |           |           |
| ENSG00000130985 | 0.06287425 |            | 0.06287425 |            |             |           |           |
| ENSG00000166780 |            | 0.4        |            | 0.4        |             |           | 0.3295455 |
| ENSG00000152520 |            | 0.35151515 |            | 0.35151512 |             |           | 0.2848837 |
| ENSG00000198570 | 0.31137725 | 0.11363636 | 0.31137725 | 0.11363636 | 0.44047619  | 0.372093  | 0.4767442 |
| ENSG00000136827 |            | 0.08333333 |            | 0.08333333 |             |           |           |
| ENSG00000255154 | 0.2005988  | 0.40490798 | 0.2005988  | 0.40490797 |             |           | 0.2325581 |
| ENSG00000101445 |            | 0.27272727 |            | 0.27272723 |             |           | 0.3662791 |
| ENSG00000125779 |            | 0.39329268 |            | 0.39329268 |             |           | 0.2261905 |
| ENSG00000171606 | 0.22159091 |            | 0.22159091 |            |             |           |           |
| ENSG00000130649 |            | 0.12727273 |            | 0.12727272 |             |           | 0.4756098 |
| ENSG00000147789 |            | 0.35757576 |            | 0.35757578 |             |           | 0.327381  |
| ENSG00000138670 |            | 0.34756098 |            | 0.34756097 |             |           | 0.2117647 |
| ENSG00000150625 | 0.11077844 | 0.09202454 | 0.11077844 | 0.09202454 | 0.43452381  | 0.2906977 | 0.2142857 |
| ENSG00000106852 |            | 0.40909091 |            | 0.40909090 |             |           | 0.4302326 |
| ENSG00000253767 |            | 0.20224719 |            | 0.20224719 |             |           | 0.1477273 |
| ENSG00000149564 |            | 0.23333333 |            | 0.23333333 |             |           | 0.3197674 |
| ENSG00000137522 |            | 0.06111111 |            | 0.06111111 |             |           | 0.2034884 |
| ENSG00000178184 |            | 0.23333333 |            | 0.23333333 |             |           | 0.0639535 |
| ENSG00000179152 |            | 0.06060606 |            | 0.06060606 |             |           |           |
| ENSG00000185972 | 0.4760479  |            | 0.4760479  |            | 0.428571429 | 0.3430233 |           |

|                 |            |            |            |             |             |           |           |
|-----------------|------------|------------|------------|-------------|-------------|-----------|-----------|
| ENSG00000251664 |            | 0.05151515 |            | 0.051515152 |             |           | 0.1162791 |
| ENSG0000068383  | 0.06586826 | 0.07272727 | 0.06586826 | 0.072727273 | 0.297619048 | 0.2732558 |           |
| ENSG00000131482 |            | 0.24698795 |            | 0.246987952 |             |           | 0.3953488 |
| ENSG0000078579  |            | 0.29320988 |            | 0.293209877 |             |           | 0.4709302 |
| ENSG00000172508 | 0.49101796 | 0.41212121 | 0.49101796 | 0.412121212 |             |           | 0.377907  |
| ENSG00000114648 |            | 0.44848485 |            | 0.448484848 |             |           | 0.4176471 |
| ENSG0000079950  |            | 0.38719512 |            | 0.387195122 |             |           | 0.4709302 |
| ENSG00000105219 |            | 0.24545455 |            | 0.245454545 |             |           | 0.3197674 |
| ENSG00000120162 |            | 0.41304348 |            | 0.413043478 |             |           | 0.4       |
| ENSG00000071994 |            | 0.48466258 |            | 0.484662577 |             |           | 0.25      |
| ENSG00000124491 |            | 0.4969697  |            | 0.496969697 |             |           | 0.4186047 |
| ENSG00000163513 |            | 0.09393939 |            | 0.093939394 |             |           | 0.2325581 |
| ENSG00000110917 | 0.45508982 | 0.45757576 | 0.45508982 | 0.457575758 | 0.470238095 | 0.3953488 | 0.4302326 |
| ENSG00000090382 | 0.16167665 | 0.48787879 | 0.16167665 | 0.487878788 |             |           | 0.3372093 |
| ENSG00000115365 | 0.14156627 | 0.42592593 | 0.14156627 | 0.425925926 | 0.380952381 | 0.4318182 | 0.3372093 |
| ENSG00000146376 |            |            |            |             |             |           | 0.0795455 |
| ENSG00000198948 | 0.13772455 | 0.2030303  | 0.13772455 | 0.203030303 | 0.18452381  | 0.1976744 | 0.2616279 |
| ENSG00000196504 | 0.31666667 | 0.18333333 | 0.31666667 | 0.183333333 | 0.322222222 | 0.2840909 | 0.2840909 |
| ENSG00000198633 | 0.16766467 |            | 0.16766467 |             |             |           | 0.3023256 |
| ENSG00000164434 |            | 0.41818182 |            | 0.418181818 |             |           | 0.4360465 |
| ENSG00000173862 | 0.2245509  |            | 0.2245509  |             | 0.255952381 | 0.3313953 |           |
| ENSG00000134480 | 0.11077844 |            | 0.11077844 |             |             |           |           |
| ENSG00000126016 |            | 0.15340909 |            | 0.153409091 | 0.188888889 | 0.1888889 | 0.3181818 |
| ENSG00000079277 | 0.06586826 | 0.26666667 | 0.06586826 | 0.266666667 |             |           | 0.3604651 |
| ENSG00000118473 | 0.46084337 | 0.45454545 | 0.46084337 | 0.454545455 | 0.446428571 | 0.4883721 | 0.2727273 |
| ENSG00000101558 |            | 0.49090909 |            | 0.490909091 |             |           | 0.4709302 |
| ENSG00000205423 |            | 0.06111111 |            | 0.061111111 |             |           |           |
| ENSG00000178935 |            | 0.17575758 |            | 0.175757576 |             |           | 0.1411765 |
| ENSG00000013619 |            | 0.43888889 |            | 0.438888889 |             |           | 0.3488372 |
| ENSG00000188958 |            | 0.47222222 |            | 0.472222222 | 0.3         | 0.1777778 | 0.125     |
| ENSG00000104728 |            | 0.36969697 |            | 0.36969697  |             |           | 0.4593023 |
| ENSG00000117013 |            | 0.16091954 |            | 0.16091954  |             |           | 0.0795455 |
| ENSG00000221949 |            | 0.35151515 |            | 0.351515152 |             |           | 0.3662791 |
| ENSG00000198932 |            |            |            |             |             |           | 0.1363636 |
| ENSG00000111249 |            | 0.22121212 |            | 0.221212121 |             |           | 0.127907  |
| ENSG00000122025 |            | 0.48787879 |            | 0.487878788 |             |           | 0.4360465 |
| ENSG00000137507 |            | 0.47272727 |            | 0.472727273 |             |           | 0.3869048 |
| ENSG00000114999 |            | 0.20689655 |            | 0.206896552 |             |           | 0.4302326 |
| ENSG00000146215 |            | 0.39090909 |            | 0.390909091 |             |           | 0.3488372 |
| ENSG00000095906 |            | 0.28888889 |            | 0.288888889 |             |           | 0.4444444 |
| ENSG00000134061 |            | 0.0969697  |            | 0.096969697 |             |           | 0.2222222 |
| ENSG00000105281 | 0.37650602 |            | 0.37650602 |             | 0.488888889 | 0.4666667 |           |
| ENSG00000113083 |            | 0.15       |            | 0.15        |             |           |           |
| ENSG00000105778 |            | 0.43636364 |            | 0.436363636 |             |           | 0.3604651 |
| ENSG00000150773 | 0.06287425 |            | 0.06287425 |             | 0.375       | 0.3837209 |           |
| ENSG00000110013 |            |            |            |             |             |           | 0.1385542 |
| ENSG00000104833 |            | 0.42424242 |            | 0.424242424 |             |           | 0.3658537 |
| ENSG00000166263 |            | 0.4        |            | 0.4         |             |           | 0.4545455 |
| ENSG00000144357 |            | 0.3        |            | 0.3         |             |           | 0.494186  |
| ENSG00000130309 |            | 0.5        |            | 0.5         |             |           | 0.1046512 |
| ENSG00000137073 | 0.46107784 | 0.4030303  | 0.46107784 | 0.403030303 | 0.202380952 | 0.2771084 | 0.2848837 |
| ENSG00000106479 |            | 0.4127907  |            | 0.412790698 |             |           | 0.3977273 |
| ENSG00000180801 | 0.29341317 | 0.25       | 0.29341317 | 0.25        |             |           | 0.3837209 |
| ENSG00000120915 |            | 0.23939394 |            | 0.239393939 |             |           | 0.4235294 |

|                 |            |            |            |             |             |           |           |
|-----------------|------------|------------|------------|-------------|-------------|-----------|-----------|
| ENSG0000068305  | 0.18862275 | 0.48170732 | 0.18862275 | 0.481707317 |             | 0.0813953 | 0.4882353 |
| ENSG00000240682 |            |            |            |             |             |           | 0.0755814 |
| ENSG00000100364 | 0.41017964 | 0.44848485 | 0.41017964 | 0.448484848 | 0.388888889 | 0.4555556 | 0.4825581 |
| ENSG00000181031 |            | 0.22222222 |            | 0.22222222  |             |           |           |
| ENSG00000103876 |            | 0.47878788 |            | 0.478787879 | 0.166666667 | 0.1125    | 0.3604651 |
| ENSG00000186001 |            | 0.11111111 |            | 0.11111111  |             |           | 0.0595238 |
| ENSG00000085832 |            | 0.21515152 |            | 0.215151515 |             |           |           |
| ENSG00000198846 |            | 0.41818182 |            | 0.418181818 |             |           | 0.4709302 |
| ENSG00000170054 | 0.28125    | 0.45061728 | 0.28125    | 0.450617284 |             |           | 0.4593023 |
| ENSG00000076706 |            | 0.28963415 |            | 0.289634146 |             |           | 0.4069767 |
| ENSG00000173093 | 0.2012987  |            | 0.2012987  |             | 0.189189189 | 0.1785714 |           |
| ENSG00000204099 | 0.48795181 | 0.41515152 | 0.48795181 | 0.415151515 | 0.404761905 | 0.1488095 | 0.3488372 |
| ENSG00000105223 | 0.23493976 | 0.30555556 | 0.23493976 | 0.305555556 | 0.125       | 0.1453488 |           |
| ENSG00000100802 |            | 0.33030303 |            | 0.33030303  |             |           | 0.1744186 |
| ENSG00000241878 | 0.05       | 0.28787879 | 0.05       | 0.287878788 | 0.113095238 | 0.0523256 | 0.377907  |
| ENSG00000125864 |            | 0.41212121 |            | 0.412121212 |             |           | 0.4709302 |
| ENSG00000204193 |            | 0.20606061 |            | 0.206060606 |             |           | 0.3488372 |
| ENSG00000168243 |            | 0.48484848 |            | 0.484848485 |             |           | 0.3197674 |
| ENSG00000147905 |            |            |            |             |             |           | 0.2383721 |
| ENSG00000186376 | 0.42222222 | 0.32777778 | 0.42222222 | 0.327777778 | 0.366666667 | 0.4659091 | 0.0581395 |
| ENSG00000100104 |            | 0.07222222 |            | 0.072222222 |             |           | 0.125     |
| ENSG00000102125 |            |            |            |             |             |           | 0.1477273 |
| ENSG00000164488 |            | 0.16363636 |            | 0.163636364 |             |           | 0.1860465 |
| ENSG00000072832 |            |            |            |             |             | 0.0681818 | 0.1162791 |
| ENSG00000105656 |            | 0.35126582 |            | 0.351265823 |             |           | 0.2380952 |
| ENSG00000170515 | 0.18862275 |            | 0.18862275 |             |             |           |           |
| ENSG00000158062 | 0.41011236 | 0.25       | 0.41011236 | 0.25        | 0.43452381  | 0.4476744 | 0.4534884 |
| ENSG00000167600 | 0.12222222 | 0.24545455 | 0.12222222 | 0.245454545 | 0.122222222 | 0.1555556 | 0.2325581 |
| ENSG00000204590 |            | 0.32727273 |            | 0.327272727 |             |           | 0.2588235 |
| ENSG00000164283 |            | 0.46666667 |            | 0.466666667 |             |           | 0.3197674 |
| ENSG00000105289 | 0.16566265 | 0.41515152 | 0.16566265 | 0.415151515 | 0.369047619 | 0.3941176 | 0.377907  |
| ENSG00000180891 | 0.19512195 |            | 0.19512195 |             |             |           |           |
| ENSG00000167910 |            | 0.39197531 |            | 0.391975309 |             |           | 0.255814  |
| ENSG00000143753 |            | 0.31081081 |            | 0.310810811 |             |           | 0.4078947 |
| ENSG00000183032 | 0.16666667 | 0.46646341 | 0.16666667 | 0.466463415 |             |           | 0.4058824 |
| ENSG00000136631 | 0.29640719 |            | 0.29640719 |             |             |           |           |
| ENSG00000169105 |            | 0.07878788 |            | 0.078787879 |             |           | 0.1104651 |
| ENSG00000197653 |            |            |            |             |             |           | 0.0697674 |
| ENSG00000140104 | 0.38323353 | 0.19393939 | 0.38323353 | 0.193939394 | 0.273809524 | 0.377907  | 0.372093  |
| ENSG00000137872 | 0.10778443 | 0.3597561  | 0.10778443 | 0.359756098 | 0.477272727 | 0.4666667 | 0.2333333 |
| ENSG00000112053 |            | 0.16060606 |            | 0.160606061 |             |           | 0.0697674 |
| ENSG00000132463 | 0.17613636 | 0.05113636 | 0.17613636 | 0.051136364 | 0.155555556 | 0.2386364 |           |
| ENSG00000165923 |            | 0.45151515 |            | 0.451515152 |             |           | 0.2848837 |
| ENSG00000164953 |            | 0.41212121 |            | 0.412121212 |             |           | 0.2034884 |
| ENSG00000178177 |            | 0.49444444 |            | 0.494444444 |             |           | 0.2674419 |
| ENSG00000196876 | 0.41566265 | 0.24848485 | 0.41566265 | 0.248484848 |             |           | 0.5       |
| ENSG00000166860 |            | 0.07272727 |            | 0.072727273 |             |           | 0.1590909 |
| ENSG00000175097 |            | 0.37341772 |            | 0.373417722 |             |           | 0.2317073 |
| ENSG00000204673 | 0.44578313 | 0.15454545 | 0.44578313 | 0.154545455 | 0.476190476 | 0.4069767 | 0.0988372 |
| ENSG00000225830 | 0.23053892 | 0.3902439  | 0.23053892 | 0.390243902 | 0.306818182 | 0.3181818 | 0.3313953 |
| ENSG00000156587 | 0.3742515  | 0.43333333 | 0.3742515  | 0.433333333 | 0.06547619  | 0.1162791 | 0.3255814 |
| ENSG00000177628 | 0.47305389 |            | 0.47305389 |             | 0.255952381 | 0.2616279 |           |
| ENSG00000127507 | 0.10479042 | 0.28787879 | 0.10479042 | 0.287878788 | 0.089285714 | 0.0523256 | 0.2840909 |
| ENSG00000164011 |            | 0.17272727 |            | 0.172727273 |             |           |           |

|                        |            |            |            |             |             |           |           |
|------------------------|------------|------------|------------|-------------|-------------|-----------|-----------|
| <b>ENSG00000155438</b> |            |            |            |             |             |           | 0.2325581 |
| <b>ENSG0000072210</b>  |            | 0.46363636 |            | 0.463636364 |             |           | 0.1130952 |
| <b>ENSG00000174059</b> | 0.32335329 | 0.15757576 | 0.32335329 | 0.157575758 | 0.291666667 | 0.3255814 | 0.4186047 |
| <b>ENSG00000108797</b> | 0.05389222 | 0.07012195 | 0.05389222 | 0.070121951 |             |           |           |
| <b>ENSG00000111669</b> | 0.40718563 |            | 0.40718563 |             | 0.397590361 | 0.3372093 |           |
| <b>ENSG00000184602</b> |            | 0.46060606 |            | 0.460606061 |             |           | 0.4709302 |
| <b>ENSG00000169976</b> | 0.17065868 |            | 0.17065868 |             |             |           |           |
| <b>ENSG00000197024</b> | 0.39393939 | 0.35151515 | 0.39393939 | 0.351515152 |             | 0.0952381 | 0.0872093 |
| <b>ENSG00000113734</b> |            | 0.14242424 |            | 0.142424242 |             |           |           |
| <b>ENSG00000257591</b> | 0.24550898 | 0.45151515 | 0.24550898 | 0.451515152 |             |           | 0.4127907 |
| <b>ENSG00000173214</b> | 0.15       | 0.44242424 | 0.15       | 0.442424242 | 0.487951807 | 0.4476744 | 0.4302326 |
| <b>ENSG00000151360</b> | 0.43072289 |            | 0.43072289 |             | 0.327380952 | 0.3529412 |           |
| <b>ENSG00000181894</b> |            | 0.16060606 |            | 0.160606061 |             |           | 0.3953488 |
| <b>ENSG00000114491</b> | 0.27469136 | 0.16111111 | 0.27469136 | 0.161111111 | 0.398809524 | 0.4883721 | 0.2727273 |
| <b>ENSG00000170456</b> |            | 0.46646341 |            | 0.466463415 |             |           | 0.4058824 |
| <b>ENSG00000253314</b> |            | 0.2969697  |            | 0.296969697 |             |           | 0.1744186 |
| <b>ENSG00000229164</b> |            | 0.49090909 |            | 0.490909091 |             |           | 0.1627907 |
| <b>ENSG00000082196</b> | 0.26347305 | 0.35454545 | 0.26347305 | 0.354545455 | 0.119047619 | 0.127907  | 0.494186  |
| <b>ENSG00000141542</b> |            | 0.30487805 |            | 0.304878049 |             |           | 0.3647059 |
| <b>ENSG00000121236</b> | 0.4491018  | 0.12962963 | 0.4491018  | 0.12962963  | 0.452380952 | 0.4825581 | 0.3963415 |
| <b>ENSG00000198908</b> |            | 0.09006211 |            | 0.090062112 |             |           | 0.1823529 |
| <b>ENSG00000134291</b> |            | 0.45505618 |            | 0.45505618  |             |           | 0.1022727 |
| <b>ENSG00000072756</b> | 0.24157303 | 0.1030303  | 0.24157303 | 0.103030303 |             |           |           |
| <b>ENSG00000145808</b> |            | 0.09444444 |            | 0.094444444 |             |           | 0.0872093 |
| <b>ENSG00000103710</b> |            | 0.15151515 |            | 0.151515152 |             |           |           |
| <b>ENSG00000176956</b> |            | 0.5        |            | 0.5         |             |           | 0.3488372 |
| <b>ENSG00000122735</b> | 0.38922156 | 0.16969697 | 0.38922156 | 0.16969697  | 0.178571429 | 0.125     | 0.3295455 |
| <b>ENSG00000167840</b> |            | 0.20606061 |            | 0.206060606 |             |           |           |
| <b>ENSG00000186812</b> | 0.09337349 | 0.47272727 | 0.09337349 | 0.472727273 | 0.404761905 | 0.3095238 | 0.3372093 |
| <b>ENSG00000091986</b> | 0.33832335 |            | 0.33832335 |             | 0.136904762 | 0.0988372 |           |
| <b>ENSG00000140691</b> | 0.19161677 |            | 0.19161677 |             | 0.285714286 | 0.2674419 | 0.0795455 |
| <b>ENSG00000054938</b> | 0.18373494 |            | 0.18373494 |             | 0.43373494  | 0.4302326 |           |
| <b>ENSG00000134001</b> | 0.4491018  |            | 0.4491018  |             | 0.404761905 | 0.5       | 0.4659091 |
| <b>ENSG00000176435</b> | 0.30821918 |            | 0.30821918 |             | 0.397590361 | 0.3918919 |           |
| <b>ENSG00000213145</b> | 0.43113772 |            | 0.43113772 |             |             |           |           |
| <b>ENSG00000108848</b> |            | 0.45283019 |            | 0.452830189 |             |           | 0.4186047 |
| <b>ENSG00000177602</b> |            | 0.49444444 |            | 0.494444444 |             |           | 0.4659091 |
| <b>ENSG00000158828</b> |            | 0.46428571 |            | 0.464285714 |             |           | 0.4659091 |
| <b>ENSG00000204969</b> |            | 0.44545455 |            | 0.445454545 |             |           | 0.4939759 |
| <b>ENSG00000107789</b> | 0.07831325 |            | 0.07831325 |             | 0.220238095 | 0.3372093 |           |
| <b>ENSG00000101361</b> |            | 0.32121212 |            | 0.321212121 | 0.25        | 0.2209302 | 0.2325581 |
| <b>ENSG00000179344</b> | 0.26047904 | 0.41818182 | 0.26047904 | 0.418181818 | 0.488888889 | 0.4418605 | 0.4767442 |
| <b>ENSG00000104760</b> | 0.49101796 |            | 0.49101796 |             | 0.433333333 | 0.4360465 |           |
| <b>ENSG00000116161</b> |            | 0.21212121 |            | 0.212121212 | 0.333333333 | 0.4651163 | 0.0872093 |
| <b>ENSG00000116574</b> |            | 0.26666667 |            | 0.266666667 |             |           | 0.255814  |
| <b>ENSG00000112339</b> | 0.3        | 0.46363636 | 0.3        | 0.463636364 | 0.433333333 | 0.5       | 0.494186  |
| <b>ENSG00000023171</b> | 0.29640719 | 0.375      | 0.29640719 | 0.375       | 0.261904762 | 0.2411765 | 0.3139535 |
| <b>ENSG00000169251</b> |            | 0.48255814 |            | 0.48255814  |             | 0.0755814 |           |
| <b>ENSG00000136235</b> | 0.11976048 | 0.31818182 | 0.11976048 | 0.318181818 | 0.202380952 | 0.2383721 | 0.1395349 |
| <b>ENSG00000107968</b> | 0.39655172 | 0.12727273 | 0.39655172 | 0.127272727 |             | 0.0555556 |           |
| <b>ENSG00000185477</b> |            | 0.49404762 |            | 0.494047619 |             |           | 0.4767442 |
| <b>ENSG00000167397</b> |            | 0.38636364 |            | 0.386363636 |             |           | 0.25      |
| <b>ENSG00000085511</b> |            | 0.4        |            | 0.4         |             |           | 0.2267442 |
| <b>ENSG00000173193</b> | 0.1257485  | 0.4378882  | 0.1257485  | 0.437888199 | 0.06626506  | 0.152439  | 0.4244186 |

|                 |            |            |            |            |             |  |                     |
|-----------------|------------|------------|------------|------------|-------------|--|---------------------|
| ENSG00000164645 | 0.28484848 |            | 0.28484848 |            | 0.077777778 |  | 0.1445783           |
| ENSG00000160856 | 0.39820359 | 0.41212121 | 0.39820359 | 0.41212121 | 0.366666667 |  | 0.4886364 0.4476744 |
| ENSG0000075391  |            | 0.12121212 |            | 0.12121212 |             |  | 0.0529412           |
| ENSG00000204695 |            | 0.17575758 |            | 0.17575758 |             |  | 0.2034884           |
| ENSG00000018510 |            | 0.23333333 |            | 0.23333333 |             |  | 0.3863636           |
| ENSG00000117450 | 0.07185629 |            | 0.07185629 |            | 0.142857143 |  | 0.0930233           |
| ENSG00000133980 | 0.10479042 |            | 0.10479042 |            | 0.380952381 |  | 0.4186047           |
| ENSG00000143771 |            | 0.3        |            | 0.3        |             |  |                     |
| ENSG00000167981 |            | 0.27878788 |            | 0.27878788 |             |  | 0.1511628           |
| ENSG00000123572 | 0.49401198 | 0.37116564 | 0.49401198 | 0.37116564 |             |  | 0.0595238           |
| ENSG00000187514 | 0.40718563 |            | 0.40718563 |            | 0.172619048 |  | 0.0697674           |
| ENSG00000109079 |            | 0.05454545 |            | 0.05454545 |             |  | 0.1686047           |
| ENSG00000175470 |            | 0.33939394 |            | 0.33939394 |             |  | 0.4545455           |
| ENSG00000138347 | 0.17964072 | 0.48170732 | 0.17964072 | 0.48170732 | 0.25        |  | 0.2209302 0.4318182 |
| ENSG00000153066 |            | 0.30128205 |            | 0.30128205 |             |  |                     |
| ENSG00000153162 |            | 0.2652439  |            | 0.2652439  |             |  | 0.2559524           |
| ENSG00000171102 |            | 0.0969697  |            | 0.0969697  |             |  |                     |
| ENSG00000139116 |            | 0.18181818 |            | 0.18181818 |             |  | 0.3117647           |
| ENSG00000164627 |            | 0.47852761 |            | 0.47852761 | 0.25        |  | 0.2267442 0.4709302 |
| ENSG00000115825 |            | 0.35493827 |            | 0.35493827 |             |  | 0.4767442           |
| ENSG00000116874 |            | 0.47878788 |            | 0.47878788 |             |  | 0.4593023           |
| ENSG00000151948 | 0.47005988 | 0.20606061 | 0.47005988 | 0.20606061 | 0.25        |  | 0.25 0.3313953      |
| ENSG00000158717 | 0.28353659 | 0.11042945 | 0.28353659 | 0.11042945 | 0.311111111 |  | 0.3522727           |
| ENSG00000255247 |            |            |            |            | 0.077777778 |  | 0.1363636           |
| ENSG00000129187 |            | 0.42073171 |            | 0.42073171 |             |  | 0.3529412           |
| ENSG00000069188 | 0.47305389 | 0.43333333 | 0.47305389 | 0.43333333 | 0.107142857 |  | 0.0755814 0.3255814 |
| ENSG00000197852 |            | 0.45454545 |            | 0.45454545 |             |  | 0.4534884           |
| ENSG00000119888 |            | 0.17272727 |            | 0.17272727 |             |  | 0.1453488           |
| ENSG00000180089 |            | 0.42283951 |            | 0.42283951 |             |  | 0.2823529           |
| ENSG00000174791 |            | 0.36363636 |            | 0.36363636 |             |  | 0.372093            |
| ENSG00000169609 | 0.2439759  |            | 0.2439759  |            | 0.323170732 |  | 0.2235294           |
| ENSG00000172171 |            | 0.1097561  |            | 0.1097561  |             |  | 0.2857143           |
| ENSG00000018408 | 0.32022472 | 0.25       | 0.32022472 | 0.25       | 0.433333333 |  | 0.4318182 0.2045455 |
| ENSG00000175395 |            | 0.48780488 |            | 0.48780488 |             |  | 0.4882353           |
| ENSG00000143570 | 0.23053892 | 0.13939394 | 0.23053892 | 0.13939394 | 0.488095238 |  | 0.4244186           |
| ENSG00000138639 | 0.3502994  | 0.26436782 | 0.3502994  | 0.26436782 | 0.452380952 |  | 0.4127907 0.3863636 |
| ENSG00000075234 |            | 0.14942529 |            | 0.14942529 |             |  |                     |
| ENSG00000177519 |            | 0.47222222 |            | 0.47222222 |             |  | 0.1860465           |
| ENSG00000183640 |            | 0.48484848 |            | 0.48484848 |             |  | 0.3313953           |
| ENSG00000121481 |            | 0.05454545 |            | 0.05454545 |             |  | 0.3895349           |
| ENSG00000115239 | 0.47904192 | 0.20348837 | 0.47904192 | 0.20348837 | 0.464285714 |  | 0.4534884 0.2954545 |
| ENSG00000119922 |            | 0.21515152 |            | 0.21515152 |             |  |                     |
| ENSG00000067066 | 0.37125749 | 0.40490798 | 0.37125749 | 0.40490798 | 0.464285714 |  | 0.4476744 0.2209302 |
| ENSG00000137776 |            | 0.21036585 |            | 0.21036585 |             |  | 0.4470588           |
| ENSG00000171954 |            | 0.48484848 |            | 0.48484848 |             |  | 0.5                 |
| ENSG00000104381 |            | 0.32022472 |            | 0.32022472 |             |  | 0.3295455           |
| ENSG00000205786 | 0.39520958 |            | 0.39520958 |            | 0.345238095 |  | 0.4352941           |
| ENSG00000129295 |            | 0.09393939 |            | 0.09393939 |             |  |                     |
| ENSG00000164258 |            | 0.49375    |            | 0.49375    |             |  | 0.3095238           |
| ENSG00000125834 | 0.22727273 | 0.49074074 | 0.22727273 | 0.49074074 | 0.142857143 |  | 0.2151163 0.0930233 |
| ENSG00000176871 |            | 0.28787879 |            | 0.28787879 |             |  | 0.4651163           |
| ENSG00000174442 | 0.26807229 | 0.09393939 | 0.26807229 | 0.09393939 | 0.493975904 |  | 0.4709302           |
| ENSG00000187109 |            | 0.39634146 |            | 0.39634146 |             |  | 0.4888889           |
| ENSG00000009709 |            | 0.43939394 |            | 0.43939394 | 0.071428571 |  | 0.0697674 0.4418605 |

|                 |            |            |            |             |             |           |           |
|-----------------|------------|------------|------------|-------------|-------------|-----------|-----------|
| ENSG00000130226 |            | 0.21212121 |            | 0.21212121  |             |           | 0.25      |
| ENSG00000172878 | 0.16981132 | 0.48742138 | 0.16981132 | 0.487421384 | 0.18125     | 0.1325301 | 0.4085366 |
| ENSG00000167325 |            | 0.46111111 |            | 0.461111111 | 0.366666667 | 0.4222222 | 0.4222222 |
| ENSG00000153404 |            | 0.46060606 |            | 0.460606061 |             |           | 0.474359  |
| ENSG00000162630 |            | 0.05454545 |            | 0.054545455 |             |           |           |
| ENSG00000095015 |            | 0.38888889 |            | 0.388888889 |             |           | 0.1097561 |
| ENSG00000241794 | 0.10179641 |            | 0.10179641 |             |             |           | 0.0681818 |
| ENSG00000172399 |            | 0.25454545 |            | 0.254545455 |             |           | 0.4883721 |
| ENSG00000114529 |            | 0.45       |            | 0.45        |             |           | 0.5       |
| ENSG00000103023 | 0.09281437 | 0.05182927 | 0.09281437 | 0.051829268 | 0.37804878  | 0.4244186 |           |
| ENSG00000151704 | 0.17964072 | 0.16666667 | 0.17964072 | 0.166666667 | 0.083333333 | 0.0639535 | 0.0755814 |
| ENSG00000005243 |            | 0.38181818 |            | 0.381818182 |             |           | 0.1976744 |
| ENSG00000172269 | 0.11377246 | 0.45454545 | 0.11377246 | 0.454545455 | 0.25        | 0.2034884 | 0.4651163 |
| ENSG00000085788 |            | 0.26666667 |            | 0.266666667 |             |           | 0.3488372 |
| ENSG00000140660 |            | 0.28333333 |            | 0.283333333 |             |           | 0.4886364 |
| ENSG00000160401 |            | 0.46969697 |            | 0.46969697  |             |           | 0.3255814 |
| ENSG00000116337 |            | 0.17575758 |            | 0.175757576 |             |           |           |
| ENSG00000147724 |            | 0.39634146 |            | 0.396341463 | 0.066666667 | 0.1136364 | 0.4418605 |
| ENSG00000163735 |            | 0.3        |            | 0.3         |             |           | 0.372093  |
| ENSG00000213024 | 0.20359281 | 0.40490798 | 0.20359281 | 0.404907975 | 0.445783133 | 0.4418605 | 0.3837209 |
| ENSG00000109906 | 0.33707865 |            | 0.33707865 |             | 0.388888889 | 0.4555556 |           |
| ENSG00000092068 | 0.47159091 | 0.47575758 | 0.47159091 | 0.475757576 | 0.466666667 | 0.4772727 | 0.4534884 |
| ENSG00000111321 |            | 0.25757576 |            | 0.257575758 |             |           | 0.1705882 |
| ENSG00000159459 |            | 0.11818182 |            | 0.118181818 |             |           | 0.2209302 |
| ENSG00000164978 | 0.43113772 |            | 0.43113772 |             | 0.43452381  | 0.4127907 |           |
| ENSG00000171777 |            |            |            |             |             |           | 0.2674419 |
| ENSG00000197043 | 0.28143713 | 0.06111111 | 0.28143713 | 0.061111111 | 0.410714286 | 0.4941176 |           |
| ENSG00000214447 | 0.22155689 | 0.24848485 | 0.22155689 | 0.248484848 | 0.357142857 | 0.2034884 | 0.1964286 |
| ENSG00000022567 | 0.18562874 | 0.44252874 | 0.18562874 | 0.442528736 | 0.196428571 | 0.1744186 | 0.4294118 |
| ENSG00000164172 |            | 0.25       |            | 0.25        | 0.172619048 | 0.0813953 | 0.0988372 |
| ENSG00000146013 |            | 0.31666667 |            | 0.316666667 |             |           | 0.375     |
| ENSG00000162551 |            | 0.22121212 |            | 0.221212121 |             |           | 0.3863636 |
| ENSG00000165474 |            | 0.17575758 |            | 0.175757576 |             |           | 0.494186  |
| ENSG00000159650 |            | 0.42121212 |            | 0.421212121 |             |           | 0.4764706 |
| ENSG00000130414 |            | 0.44848485 |            | 0.448484848 |             |           | 0.4883721 |
| ENSG00000162391 | 0.05988024 | 0.05       | 0.05988024 | 0.05        |             |           | 0.2428571 |
| ENSG00000144852 | 0.40718563 | 0.20245399 | 0.40718563 | 0.202453988 | 0.289156627 | 0.2823529 | 0.494186  |
| ENSG00000254245 |            | 0.20224719 |            | 0.202247191 |             |           | 0.1477273 |
| ENSG00000182816 | 0.07784431 |            | 0.07784431 |             |             |           |           |
| ENSG00000106089 |            | 0.26666667 |            | 0.266666667 |             |           | 0.2209302 |
| ENSG00000140632 |            | 0.23939394 |            | 0.239393939 |             |           | 0.1976744 |
| ENSG00000180008 |            | 0.44242424 |            | 0.442424242 |             |           | 0.25      |
| ENSG00000162976 |            | 0.1954023  |            | 0.195402299 |             |           |           |
| ENSG00000139675 | 0.07777778 |            | 0.07777778 |             |             |           |           |
| ENSG00000117281 |            | 0.30606061 |            | 0.306060606 |             |           | 0.1941176 |
| ENSG00000137944 |            | 0.47575758 |            | 0.475757576 |             |           | 0.494186  |
| ENSG00000188488 | 0.34431138 | 0.47878788 | 0.34431138 | 0.478787879 | 0.340909091 | 0.4       | 0.1590909 |
| ENSG00000196743 | 0.49700599 | 0.33888889 | 0.49700599 | 0.338888889 | 0.422619048 | 0.4534884 | 0.3333333 |
| ENSG00000111445 | 0.20658683 |            | 0.20658683 |             | 0.178571429 | 0.2034884 |           |
| ENSG00000205078 |            | 0.23888889 |            | 0.238888889 |             |           |           |
| ENSG00000101276 | 0.18263473 | 0.25757576 | 0.18263473 | 0.257575758 | 0.380952381 | 0.4767442 | 0.3662791 |
| ENSG00000102349 |            | 0.09090909 |            | 0.090909091 |             |           |           |
| ENSG00000175604 | 0.34431138 | 0.33707865 | 0.34431138 | 0.337078652 | 0.204819277 | 0.2848837 | 0.2857143 |
| ENSG00000132915 |            | 0.44242424 |            | 0.442424242 |             |           | 0.4651163 |

|                 |            |            |             |             |             |           |           |
|-----------------|------------|------------|-------------|-------------|-------------|-----------|-----------|
| ENSG0000072315  | 0.35928144 |            | 0.35928144  |             |             |           |           |
| ENSG00000213889 |            |            |             |             | 0.077380952 |           |           |
| ENSG0000015153  | 0.43636364 |            | 0.43636366  |             |             | 0.4352941 |           |
| ENSG00000153012 | 0.4969697  |            | 0.496969697 |             |             | 0.3882353 |           |
| ENSG0000023909  | 0.28571429 |            | 0.285714286 |             |             | 0.2650602 |           |
| ENSG00000198925 | 0.28220859 |            | 0.282208589 |             |             | 0.1463415 |           |
| ENSG00000232103 | 0.17964072 |            | 0.17964072  |             | 0.313253012 | 0.4047619 |           |
| ENSG0000088992  | 0.2        |            | 0.2         |             |             | 0.2325581 |           |
| ENSG00000138696 | 0.46666667 |            | 0.466666667 |             |             | 0.377907  |           |
| ENSG00000127663 | 0.43452381 |            | 0.43452381  |             |             | 0.3197674 |           |
| ENSG00000154832 |            |            |             |             |             | 0.0795455 |           |
| ENSG00000170522 | 0.34090909 |            | 0.340909091 |             |             | 0.4593023 |           |
| ENSG00000105568 | 0.25748503 | 0.32222222 | 0.25748503  | 0.32222222  | 0.089285714 | 0.1918605 |           |
| ENSG00000111701 | 0.24539877 |            | 0.245398773 |             |             | 0.4204545 |           |
| ENSG00000182985 | 0.4969697  |            | 0.496969697 |             |             | 0.1627907 |           |
| ENSG00000172922 | 0.38333333 |            | 0.383333333 |             |             | 0.3522727 |           |
| ENSG00000137496 | 0.43674699 | 0.06179775 | 0.43674699  | 0.061797753 | 0.345238095 | 0.255814  | 0.1931818 |
| ENSG00000100575 | 0.44578313 |            | 0.44578313  |             |             |           |           |
| ENSG00000196865 | 0.28181818 |            | 0.281818182 |             |             | 0.2294118 |           |
| ENSG00000099338 | 0.49090909 |            | 0.490909091 |             |             | 0.4651163 |           |
| ENSG00000125901 |            |            |             |             |             | 0.3488372 |           |
| ENSG00000171056 | 0.28484848 |            | 0.284848485 |             |             | 0.4418605 |           |
| ENSG00000198300 | 0.4969697  |            | 0.496969697 |             |             | 0.4651163 |           |
| ENSG00000166451 | 0.1        |            | 0.1         |             | 0.344444444 | 0.375     |           |
| ENSG00000172009 | 0.22392638 |            | 0.22392638  |             | 0.36746988  | 0.3647059 |           |
| ENSG00000123411 |            |            |             |             |             | 0.1136364 |           |
| ENSG00000122870 | 0.05       |            | 0.05        |             |             | 0.0666667 |           |
| ENSG00000176593 | 0.15568862 | 0.41212121 | 0.15568862  | 0.412121212 | 0.083333333 | 0.0581395 | 0.4011628 |
| ENSG00000154764 | 0.41515152 |            | 0.415151515 |             |             | 0.4       |           |
| ENSG00000145687 | 0.28787879 |            | 0.287878788 |             |             | 0.1       |           |
| ENSG00000095981 | 0.40419162 | 0.46363636 | 0.40419162  | 0.463636364 | 0.380952381 | 0.2823529 | 0.3662791 |
| ENSG00000176771 | 0.1257485  | 0.08181818 | 0.1257485   | 0.081818182 | 0.068181818 | 0.3895349 |           |
| ENSG00000197417 | 0.33939394 |            | 0.339393939 |             |             | 0.3823529 |           |
| ENSG00000167971 | 0.05521472 |            | 0.055214724 |             |             |           |           |
| ENSG00000013725 | 0.37804878 |            | 0.37804878  |             |             | 0.1       |           |
| ENSG00000132517 | 0.2        |            | 0.2         |             | 0.102409639 | 0.1046512 |           |
| ENSG00000009950 | 0.18484848 |            | 0.184848485 |             |             | 0.1104651 |           |
| ENSG00000127124 | 0.18072289 | 0.42121212 | 0.18072289  | 0.421212121 | 0.392857143 | 0.4411765 | 0.4545455 |
| ENSG00000113812 | 0.12121212 | 0.29393939 | 0.12121212  | 0.293939394 | 0.084337349 | 0.1705882 | 0.3895349 |
| ENSG00000127528 | 0.3258427  |            | 0.325842697 |             |             | 0.2840909 |           |
| ENSG00000218891 | 0.08484848 |            | 0.084848485 |             |             |           |           |
| ENSG00000198142 | 0.43636364 |            | 0.43636366  |             |             | 0.4302326 |           |
| ENSG00000073008 | 0.19090909 |            | 0.190909091 |             |             | 0.1352941 |           |
| ENSG00000204682 | 0.30606061 |            | 0.306060606 |             |             |           |           |
| ENSG00000145476 | 0.48333333 |            | 0.483333333 |             |             | 0.3863636 |           |
| ENSG00000164294 | 0.20606061 |            | 0.206060606 |             |             | 0.2151163 |           |
| ENSG00000182195 | 0.38068182 | 0.35757576 | 0.38068182  | 0.357575758 | 0.266666667 | 0.2159091 | 0.1744186 |
| ENSG00000214960 | 0.15822785 |            | 0.158227848 |             |             | 0.1627907 |           |
| ENSG00000159131 | 0.23939394 |            | 0.239393939 |             | 0.214285714 | 0.2093023 | 0.1976744 |
| ENSG00000107159 | 0.07831325 |            | 0.07831325  |             | 0.162650602 | 0.3352941 |           |
| ENSG00000121897 | 0.36666667 |            | 0.366666667 |             |             | 0.3295455 |           |
| ENSG00000147481 | 0.08083832 |            | 0.08083832  |             |             |           |           |
| ENSG00000175550 | 0.12951807 |            | 0.12951807  |             | 0.18452381  | 0.0813953 |           |
| ENSG00000114126 | 0.4011976  | 0.37575758 | 0.4011976   | 0.375757576 | 0.339285714 | 0.3662791 | 0.2674419 |

|                 |            |            |            |             |             |           |           |
|-----------------|------------|------------|------------|-------------|-------------|-----------|-----------|
| ENSG00000111364 |            | 0.34444444 |            | 0.34444444  |             |           |           |
| ENSG00000155761 |            | 0.49085366 |            | 0.490853659 |             |           | 0.4583333 |
| ENSG00000132300 |            | 0.47272727 |            | 0.472727273 |             |           | 0.4011628 |
| ENSG00000136869 |            | 0.14444444 |            | 0.144444444 |             |           | 0.25      |
| ENSG00000183303 |            | 0.27272727 |            | 0.272727273 |             |           | 0.122093  |
| ENSG00000153201 |            | 0.22121212 |            | 0.221212121 |             |           | 0.1046512 |
| ENSG00000105647 |            | 0.12068966 |            | 0.120689655 |             |           |           |
| ENSG0000038532  | 0.29545455 | 0.06179775 | 0.29545455 | 0.061797753 |             |           | 0.1555556 |
| ENSG00000182771 |            | 0.45757576 |            | 0.457575758 |             |           | 0.3546512 |
| ENSG00000166478 |            |            |            | 0.05952381  |             | 0.0581395 |           |
| ENSG00000241962 | 0.10179641 | 0.375      | 0.10179641 | 0.375       | 0.266666667 | 0.2386364 | 0.2764706 |
| ENSG00000166289 |            | 0.06666667 |            | 0.066666667 |             |           | 0.2111111 |
| ENSG00000149084 |            | 0.29447853 |            | 0.294478528 |             |           | 0.1927711 |
| ENSG00000186132 | 0.22754491 | 0.38109756 | 0.22754491 | 0.381097561 | 0.101190476 | 0.0755814 | 0.3666667 |
| ENSG0000046604  |            | 0.38888889 |            | 0.388888889 |             |           | 0.2386364 |
| ENSG00000101134 |            | 0.45757576 |            | 0.457575758 |             |           | 0.4534884 |
| ENSG00000139131 |            | 0.16158537 |            | 0.161585366 |             |           |           |
| ENSG00000135900 |            | 0.44444444 |            | 0.444444444 |             |           | 0.25      |
| ENSG00000138675 | 0.39156627 | 0.35151515 | 0.39156627 | 0.351515152 | 0.053571429 | 0.0823529 | 0.2616279 |
| ENSG00000170961 | 0.49700599 | 0.42777778 | 0.49700599 | 0.427777778 | 0.25        | 0.3313953 |           |
| ENSG00000082146 |            | 0.44444444 |            | 0.444444444 |             |           | 0.2840909 |
| ENSG00000198521 | 0.17365269 |            | 0.17365269 |             | 0.077380952 | 0.1686047 |           |
| ENSG00000253485 |            | 0.20224719 |            | 0.202247191 |             |           | 0.1477273 |
| ENSG00000170100 | 0.29885057 |            | 0.29885057 |             | 0.077380952 | 0.0639535 |           |
| ENSG00000180448 |            | 0.44545455 |            | 0.445454545 | 0.392857143 | 0.313253  | 0.1337209 |
| ENSG00000188817 |            | 0.49090909 |            | 0.490909091 |             |           | 0.4888889 |
| ENSG00000086015 | 0.36526946 |            | 0.36526946 |             | 0.333333333 | 0.2732558 |           |
| ENSG00000102858 |            | 0.47126437 |            | 0.471264368 | 0.166666667 | 0.0795455 | 0.3430233 |
| ENSG00000197386 |            | 0.29503106 |            | 0.295031056 |             |           | 0.3470588 |
| ENSG00000198443 |            | 0.08181818 |            | 0.081818182 | 0.466666667 | 0.402439  |           |
| ENSG00000151617 |            | 0.45505618 |            | 0.45505618  | 0.343373494 | 0.4302326 | 0.4666667 |
| ENSG00000114423 | 0.46969697 | 0.45426829 | 0.46969697 | 0.454268293 | 0.433333333 | 0.3522727 | 0.3197674 |
| ENSG00000128394 | 0.10843373 | 0.5        | 0.10843373 | 0.5         |             |           | 0.2705882 |
| ENSG00000095587 |            | 0.34545455 |            | 0.345454545 |             |           | 0.4883721 |
| ENSG00000203747 |            | 0.25842697 |            | 0.258426966 | 0.121621622 | 0.0595238 |           |
| ENSG00000182858 | 0.15060241 | 0.23030303 | 0.15060241 | 0.23030303  | 0.144578313 | 0.1860465 | 0.1802326 |
| ENSG00000100578 |            |            |            | 0.226190476 |             | 0.2616279 |           |
| ENSG00000212712 |            | 0.27878788 |            | 0.278787879 |             |           | 0.3555556 |
| ENSG00000110066 |            | 0.41011236 |            | 0.41011236  |             |           | 0.0795455 |
| ENSG00000237649 | 0.09444444 |            | 0.09444444 |             | 0.395348837 | 0.2380952 |           |
| ENSG00000214107 | 0.13333333 |            | 0.13333333 |             | 0.422222222 | 0.2840909 |           |
| ENSG00000182378 |            | 0.31460674 |            | 0.314606742 |             |           | 0.4772727 |
| ENSG00000100024 | 0.34269663 | 0.42771084 | 0.34269663 | 0.427710843 | 0.466666667 | 0.3863636 | 0.4545455 |
| ENSG00000155962 |            | 0.18181818 |            | 0.181818182 |             |           | 0.1569767 |
| ENSG00000162040 |            | 0.18012422 |            | 0.180124224 |             |           | 0.2267442 |
| ENSG00000167554 | 0.47560976 | 0.35582822 | 0.47560976 | 0.355828221 | 0.380952381 | 0.3488372 | 0.2790698 |
| ENSG00000158773 | 0.16766467 | 0.27878788 | 0.16766467 | 0.278787879 | 0.345238095 | 0.3255814 | 0.2093023 |
| ENSG00000117425 |            |            |            |             |             |           | 0.3513514 |
| ENSG00000204897 |            |            |            |             |             |           | 0.1976744 |
| ENSG00000104231 | 0.14071856 | 0.15757576 | 0.14071856 | 0.157575758 | 0.477777778 | 0.4318182 | 0.3837209 |
| ENSG00000183657 | 0.2245509  | 0.37078652 | 0.2245509  | 0.370786517 | 0.277777778 | 0.2325581 | 0.2272727 |
| ENSG00000169184 |            | 0.08181818 |            | 0.081818182 |             |           | 0.1111111 |
| ENSG00000203772 |            | 0.33231707 |            | 0.332317073 |             |           | 0.4529412 |
| ENSG00000134769 |            | 0.25555556 |            | 0.255555556 |             |           |           |



|                 |            |            |            |             |             |           |           |
|-----------------|------------|------------|------------|-------------|-------------|-----------|-----------|
| ENSG00000124198 |            | 0.38333333 |            | 0.38333333  |             |           | 0.2916667 |
| ENSG00000115841 | 0.37222222 | 0.21515152 | 0.37222222 | 0.215151515 | 0.277777778 | 0.2111111 | 0.4069767 |
| ENSG00000147571 | 0.06481481 |            | 0.06481481 |             |             |           |           |
| ENSG00000116128 | 0.08083832 | 0.15454545 | 0.08083832 | 0.154545455 | 0.327380952 | 0.3372093 | 0.372093  |
| ENSG00000122591 |            | 0.48214286 |            | 0.482142857 |             |           | 0.472973  |
| ENSG00000143375 |            | 0.14939024 |            | 0.149390244 |             |           | 0.244186  |
| ENSG00000179111 |            | 0.29090909 |            | 0.290909091 |             |           | 0.4011628 |
| ENSG00000104218 |            | 0.10365854 |            | 0.103658537 |             |           |           |
| ENSG00000111077 |            | 0.08484848 |            | 0.084848485 |             |           | 0.2267442 |
| ENSG00000137812 | 0.23595506 | 0.37575758 | 0.23595506 | 0.375757576 | 0.266666667 | 0.3409091 | 0.3409091 |
| ENSG00000133678 |            | 0.31515152 |            | 0.315151515 |             |           | 0.3488372 |
| ENSG00000159884 |            | 0.28787879 |            | 0.287878788 |             |           | 0.4411765 |
| ENSG00000165164 |            |            |            |             |             |           | 0.2209302 |
| ENSG00000101311 | 0.40718563 | 0.2247191  | 0.40718563 | 0.224719101 | 0.351190476 | 0.3546512 | 0.3392857 |
| ENSG00000145934 | 0.30555556 | 0.33030303 | 0.30555556 | 0.33030303  |             |           | 0.0930233 |
| ENSG00000130701 |            | 0.46518987 |            | 0.465189873 |             |           | 0.1104651 |
| ENSG00000140474 |            | 0.26969697 |            | 0.26969697  |             |           | 0.2848837 |
| ENSG00000081853 |            | 0.20224719 |            | 0.202247191 |             |           | 0.1477273 |
| ENSG00000134470 | 0.18333333 | 0.49090909 | 0.18333333 | 0.490909091 |             |           | 0.3837209 |
| ENSG00000196353 | 0.48876404 |            | 0.48876404 |             | 0.5         | 0.494186  |           |
| ENSG00000230891 | 0.14071856 |            | 0.14071856 |             |             | 0.1162791 |           |
| ENSG00000088035 |            | 0.43292683 |            | 0.432926829 |             |           | 0.402439  |
| ENSG00000119396 |            | 0.45       |            | 0.45        |             |           | 0.1590909 |
| ENSG00000124091 | 0.19879518 |            | 0.19879518 |             |             |           |           |
| ENSG00000170236 |            |            |            |             |             |           | 0.1511628 |
| ENSG00000180190 |            | 0.46341463 |            | 0.463414634 |             |           | 0.4360465 |
| ENSG00000172458 |            | 0.42424242 |            | 0.424242424 |             |           | 0.2790698 |
| ENSG00000111834 |            | 0.23939394 |            | 0.239393939 |             |           | 0.372093  |
| ENSG00000187812 | 0.23780488 |            | 0.23780488 |             | 0.108108108 | 0.2142857 |           |
| ENSG00000101182 | 0.09444444 | 0.2195122  | 0.09444444 | 0.219512195 | 0.233333333 | 0.2045455 | 0.1704545 |
| ENSG00000129515 |            | 0.43820225 |            | 0.438202247 |             |           | 0.2674419 |
| ENSG00000205838 |            | 0.37272727 |            | 0.372727273 |             |           | 0.4011628 |
| ENSG00000093010 | 0.22891566 | 0.29573171 | 0.22891566 | 0.295731707 |             |           | 0.377907  |
| ENSG00000127533 |            |            |            |             | 0.121621622 | 0.0641026 |           |
| ENSG00000111911 |            | 0.33030303 |            | 0.33030303  |             |           |           |
| ENSG00000125347 | 0.3258427  | 0.4        | 0.3258427  | 0.4         | 0.406976744 | 0.2674419 | 0.3555556 |
| ENSG00000123096 |            | 0.44242424 |            | 0.442424242 |             |           | 0.3154762 |
| ENSG00000091138 |            | 0.21341463 |            | 0.213414634 |             |           | 0.2674419 |
| ENSG00000175221 |            | 0.26666667 |            | 0.266666667 |             |           |           |
| ENSG00000119125 |            | 0.4969697  |            | 0.496969697 |             |           | 0.494186  |
| ENSG00000151413 |            | 0.36060606 |            | 0.360606061 |             |           | 0.4825581 |
| ENSG00000101187 | 0.14670659 | 0.45426829 | 0.14670659 | 0.454268293 | 0.172619048 | 0.2151163 | 0.4709302 |
| ENSG00000128594 |            | 0.41818182 |            | 0.418181818 |             |           | 0.1802326 |
| ENSG00000119929 | 0.47305389 |            | 0.47305389 |             | 0.410714286 | 0.4244186 |           |
| ENSG00000168883 |            |            |            |             |             |           | 0.3488372 |
| ENSG00000187987 | 0.45808383 | 0.16666667 | 0.45808383 | 0.166666667 | 0.464285714 | 0.4709302 | 0.1333333 |
| ENSG00000154898 |            | 0.05757576 |            | 0.057575758 |             |           |           |
| ENSG00000141668 | 0.21590909 | 0.14545455 | 0.21590909 | 0.145454545 | 0.488888889 | 0.4886364 | 0.4941176 |
| ENSG00000156463 |            | 0.38787879 |            | 0.387878788 |             |           | 0.2727273 |
| ENSG00000078304 |            | 0.14545455 |            | 0.145454545 |             |           | 0.297619  |
| ENSG00000152779 | 0.07784431 |            | 0.07784431 |             | 0.279761905 | 0.1976744 |           |
| ENSG00000178381 | 0.46107784 | 0.2030303  | 0.46107784 | 0.203030303 | 0.21686747  | 0.2906977 |           |
| ENSG00000259272 |            | 0.08888889 |            | 0.088888889 |             |           |           |
| ENSG00000154114 | 0.11931818 | 0.30606061 | 0.11931818 | 0.306060606 | 0.261904762 | 0.2954545 | 0.2674419 |

|                 |            |            |            |             |             |           |           |
|-----------------|------------|------------|------------|-------------|-------------|-----------|-----------|
| ENSG00000108846 |            | 0.2        |            | 0.2         |             |           | 0.1976744 |
| ENSG00000114354 |            |            |            |             |             |           | 0.2142857 |
| ENSG00000197081 |            | 0.16666667 |            | 0.16666667  |             |           | 0.1444444 |
| ENSG00000112599 | 0.06287425 |            | 0.06287425 |             | 0.071428571 | 0.0523256 | 0.0988372 |
| ENSG00000133424 | 0.20658683 | 0.23030303 | 0.20658683 | 0.23030303  | 0.18452381  | 0.2209302 | 0.2034884 |
| ENSG00000179178 | 0.1686747  |            | 0.1686747  |             | 0.172619048 |           | 0.1764706 |
| ENSG00000068615 |            | 0.46363636 |            | 0.463636364 |             |           | 0.4476744 |
| ENSG00000143653 |            | 0.42727273 |            | 0.427272727 |             |           | 0.2926829 |
| ENSG00000163486 | 0.40419162 | 0.43888889 | 0.40419162 | 0.43888889  | 0.261904762 | 0.2906977 | 0.3139535 |
| ENSG00000166169 |            | 0.31515152 |            | 0.315151515 |             |           |           |
| ENSG00000078246 |            | 0.17878788 |            | 0.178787879 |             |           | 0.3023256 |
| ENSG00000168481 |            | 0.21212121 |            | 0.212121212 |             |           | 0.0988372 |
| ENSG00000133561 | 0.37222222 | 0.3030303  | 0.37222222 | 0.303030303 | 0.458333333 | 0.4222222 | 0.375     |
| ENSG00000127415 | 0.26946108 |            | 0.26946108 |             | 0.476190476 |           | 0.2848837 |
| ENSG00000117600 | 0.14071856 |            | 0.14071856 |             |             |           |           |
| ENSG00000167685 | 0.17045455 | 0.09393939 | 0.17045455 | 0.093939394 | 0.476190476 | 0.4352941 | 0.3081395 |
| ENSG00000027075 | 0.46107784 | 0.07575758 | 0.46107784 | 0.075757576 | 0.453488372 | 0.4111111 | 0.1235294 |
| ENSG00000172775 |            | 0.06666667 |            | 0.066666667 |             |           |           |
| ENSG00000188026 | 0.41916168 | 0.38484848 | 0.41916168 | 0.384848485 |             |           |           |
| ENSG00000172365 | 0.24719101 |            | 0.24719101 |             | 0.144444444 |           | 0.1818182 |
| ENSG00000144959 | 0.18862275 | 0.30606061 | 0.18862275 | 0.306060606 | 0.25        | 0.2616279 | 0.1764706 |
| ENSG00000111737 |            | 0.19620253 |            | 0.196202532 |             |           | 0.4883721 |
| ENSG00000174720 |            | 0.06321839 |            | 0.063218391 |             |           | 0.3409091 |
| ENSG00000169469 | 0.43413174 |            | 0.43413174 |             | 0.375       |           | 0.4418605 |
| ENSG00000167720 |            | 0.05521472 |            | 0.055214724 |             |           |           |
| ENSG00000106049 |            | 0.32777778 |            | 0.327777778 |             |           | 0.1162791 |
| ENSG00000196653 | 0.0988024  | 0.07878788 | 0.0988024  | 0.078787879 |             |           |           |
| ENSG00000198515 | 0.31437126 |            | 0.31437126 |             | 0.398809524 |           | 0.4186047 |
| ENSG00000152990 |            | 0.3        |            | 0.3         |             |           | 0.2613636 |
| ENSG00000123901 |            | 0.45       |            | 0.45        |             |           | 0.3333333 |
| ENSG00000185010 |            | 0.23939394 |            | 0.239393939 |             |           | 0.1104651 |
| ENSG00000136045 |            | 0.37777778 |            | 0.377777778 |             |           | 0.2727273 |
| ENSG00000231824 |            | 0.39655172 |            | 0.396551724 |             |           | 0.4360465 |
| ENSG00000164366 |            | 0.25454545 |            | 0.254545455 |             |           |           |
| ENSG00000121005 | 0.48314607 | 0.34259259 | 0.48314607 | 0.342592593 | 0.1         | 0.0813953 | 0.3       |
| ENSG00000188001 |            | 0.34269663 |            | 0.342696629 | 0.428571429 | 0.4358974 | 0.4825581 |
| ENSG00000196154 | 0.44311377 |            | 0.44311377 |             |             |           |           |
| ENSG00000097021 |            |            |            |             |             |           | 0.2383721 |
| ENSG00000139220 | 0.25304878 | 0.18333333 | 0.25304878 | 0.183333333 | 0.136904762 | 0.1294118 | 0.2045455 |
| ENSG00000259202 | 0.05988024 | 0.41768293 | 0.05988024 | 0.417682927 |             |           | 0.4244186 |
| ENSG00000010539 |            | 0.47701149 |            | 0.477011494 |             |           | 0.3977273 |
| ENSG00000167460 | 0.12359551 |            | 0.12359551 |             |             |           |           |
| ENSG00000169174 |            | 0.30232558 |            | 0.302325581 |             |           | 0.1022727 |
| ENSG00000102287 | 0.39221557 | 0.375      | 0.39221557 | 0.375       | 0.101190476 | 0.1395349 | 0.1395349 |
| ENSG00000188549 | 0.15697674 | 0.28787879 | 0.15697674 | 0.287878788 | 0.125       | 0.0909091 | 0.3522727 |
| ENSG00000196914 |            | 0.2        |            | 0.2         |             |           |           |
| ENSG00000012048 |            | 0.33939394 |            | 0.339393939 |             | 0.0941176 | 0.2941176 |
| ENSG00000164815 | 0.46067416 |            | 0.46067416 |             | 0.488636364 | 0.5       |           |
| ENSG00000111181 |            | 0.36363636 |            | 0.363636364 |             |           | 0.3372093 |
| ENSG00000132164 |            | 0.15757576 |            | 0.157575758 |             |           | 0.1818182 |
| ENSG00000089225 |            | 0.23333333 |            | 0.233333333 |             |           | 0.3764706 |
| ENSG00000140367 |            | 0.06111111 |            | 0.061111111 |             |           |           |
| ENSG00000134758 |            | 0.48181818 |            | 0.481818182 |             |           | 0.3095238 |
| ENSG00000168275 | 0.26204819 |            | 0.26204819 |             | 0.398809524 |           | 0.4360465 |

|                 |            |            |            |             |             |  |                     |
|-----------------|------------|------------|------------|-------------|-------------|--|---------------------|
| ENSG00000165521 |            | 0.07926829 |            | 0.079268293 |             |  |                     |
| ENSG00000165197 | 0.4760479  |            | 0.4760479  |             | 0.408536585 |  | 0.3411765           |
| ENSG00000120451 | 0.46590909 | 0.44848485 | 0.46590909 | 0.448484848 | 0.473684211 |  | 0.3488372 0.5       |
| ENSG00000055163 | 0.46107784 | 0.32121212 | 0.46107784 | 0.321212121 | 0.44047619  |  | 0.494186 0.4127907  |
| ENSG00000184517 |            | 0.46932515 |            | 0.469325153 |             |  | 0.2848837           |
| ENSG00000100811 |            | 0.07272727 |            | 0.072727273 |             |  |                     |
| ENSG00000162620 | 0.16666667 | 0.08484848 | 0.16666667 | 0.084848485 | 0.31547619  |  | 0.3409091           |
| ENSG00000100911 | 0.26047904 |            | 0.26047904 |             | 0.369047619 |  | 0.3895349           |
| ENSG00000172748 | 0.10606061 | 0.37878788 | 0.10606061 | 0.378787879 | 0.422619048 |  | 0.3430233 0.4593023 |
| ENSG00000108187 |            | 0.18944099 |            | 0.189440994 |             |  | 0.2840909           |
| ENSG00000151702 |            | 0.26470588 |            | 0.264705882 |             |  | 0.275               |
| ENSG00000171940 | 0.27844311 | 0.17575758 | 0.27844311 | 0.175757576 | 0.244186047 |  | 0.3111111           |
| ENSG00000161021 |            | 0.33333333 |            | 0.333333333 |             |  | 0.3068182           |
| ENSG00000138448 |            | 0.49393939 |            | 0.493939394 |             |  | 0.1976744           |
| ENSG00000113048 |            | 0.33333333 |            | 0.333333333 |             |  | 0.3139535           |
| ENSG00000183020 | 0.40419162 | 0.43333333 | 0.40419162 | 0.433333333 | 0.273809524 |  | 0.3604651 0.377907  |
| ENSG00000108788 |            | 0.37804878 |            | 0.37804878  |             |  | 0.4418605           |
| ENSG00000161980 |            | 0.17073171 |            | 0.170731707 |             |  |                     |
| ENSG00000136156 |            |            |            |             |             |  | 0.0681818           |
| ENSG00000167080 | 0.43113772 |            | 0.43113772 |             | 0.160714286 |  | 0.0988372           |
| ENSG00000151240 |            | 0.11212121 |            | 0.112121212 |             |  |                     |
| ENSG00000171044 |            | 0.36206897 |            | 0.362068966 |             |  | 0.1744186           |
| ENSG00000108932 |            | 0.22222222 |            | 0.222222222 |             |  | 0.2272727           |
| ENSG00000173702 |            | 0.20909091 |            | 0.209090909 |             |  | 0.1104651           |
| ENSG00000135298 | 0.19461078 |            | 0.19461078 |             | 0.220238095 |  | 0.1511628           |
| ENSG00000143520 |            | 0.14545455 |            | 0.145454545 |             |  | 0.4651163           |
| ENSG00000189401 |            | 0.3597561  |            | 0.359756098 |             |  |                     |
| ENSG00000104419 | 0.18263473 | 0.38181818 | 0.18263473 | 0.381818182 |             |  | 0.2235294           |
| ENSG00000167528 | 0.05988024 | 0.41515152 | 0.05988024 | 0.415151515 | 0.255952381 |  | 0.2093023 0.3895349 |
| ENSG00000198363 | 0.10555556 | 0.49693252 | 0.10555556 | 0.496932515 | 0.295454545 |  | 0.25 0.4883721      |
| ENSG00000203943 |            | 0.06111111 |            | 0.061111111 |             |  |                     |
| ENSG00000165501 | 0.3125     | 0.43333333 | 0.3125     | 0.433333333 | 0.188888889 |  | 0.1136364 0.1       |
| ENSG00000095397 | 0.4        |            | 0.4        |             | 0.340909091 |  | 0.5                 |
| ENSG00000127311 |            | 0.35757576 |            | 0.357575758 |             |  | 0.3604651           |
| ENSG00000171202 | 0.05747126 |            | 0.05747126 |             |             |  |                     |
| ENSG00000171502 | 0.0508982  | 0.5        | 0.0508982  | 0.5         | 0.113095238 |  | 0.0639535 0.4476744 |
| ENSG00000151023 |            | 0.34545455 |            | 0.345454545 |             |  | 0.4883721           |
| ENSG00000188848 |            | 0.36111111 |            | 0.361111111 |             |  | 0.0882353           |
| ENSG00000132405 |            | 0.47575758 |            | 0.475757576 |             |  | 0.4534884           |
| ENSG00000166224 |            | 0.2030303  |            | 0.203030303 |             |  | 0.4302326           |
| ENSG00000141506 | 0.15269461 |            | 0.15269461 |             |             |  |                     |
| ENSG00000203863 | 0.20394737 | 0.2652439  | 0.20394737 | 0.265243902 |             |  | 0.1744186           |
| ENSG00000105146 |            |            |            |             | 0.126506024 |  | 0.1453488           |
| ENSG00000258653 | 0.4375     | 0.48181818 | 0.4375     | 0.481818182 | 0.422619048 |  | 0.4204545 0.4127907 |
| ENSG00000133878 | 0.40361446 |            | 0.40361446 |             | 0.494047619 |  | 0.4651163           |
| ENSG00000180263 |            | 0.32822086 |            | 0.328220859 |             |  | 0.3604651           |
| ENSG00000171621 |            | 0.45454545 |            | 0.454545455 |             |  | 0.3139535           |
| ENSG00000167657 |            | 0.20689655 |            | 0.206896552 |             |  | 0.2840909           |
| ENSG00000144771 | 0.16467066 |            | 0.16467066 |             | 0.107142857 |  | 0.1162791           |
| ENSG00000084693 |            | 0.36890244 |            | 0.368902439 |             |  | 0.1882353           |
| ENSG00000163377 |            | 0.3908046  |            | 0.390804598 | 0.488095238 |  | 0.4705882 0.1860465 |
| ENSG00000162711 |            | 0.3258427  |            | 0.325842697 |             |  | 0.4555556           |
| ENSG00000159445 |            | 0.42073171 |            | 0.420731707 |             |  | 0.3837209           |
| ENSG00000113600 |            |            |            |             | 0.053571429 |  |                     |

|                 |            |            |            |             |             |  |                     |
|-----------------|------------|------------|------------|-------------|-------------|--|---------------------|
| ENSG00000198176 |            | 0.05       |            | 0.05        | 0.083333333 |  | 0.0764706           |
| ENSG00000135960 | 0.49438202 | 0.12727273 | 0.49438202 | 0.127272727 | 0.11627907  |  | 0.1363636 0.1704545 |
| ENSG00000196811 |            |            |            |             |             |  | 0.1569767           |
| ENSG00000165476 |            | 0.47468354 |            | 0.474683544 |             |  | 0.4880952           |
| ENSG00000246922 | 0.10555556 |            | 0.10555556 |             |             |  |                     |
| ENSG00000095002 | 0.0988024  | 0.38181818 | 0.0988024  | 0.381818182 |             |  | 0.4302326           |
| ENSG00000151148 | 0.21856287 | 0.46646341 | 0.21856287 | 0.466463415 | 0.107142857 |  | 0.122093 0.25       |
| ENSG00000147533 |            | 0.26666667 |            | 0.266666667 |             |  | 0.2159091           |
| ENSG00000175920 |            | 0.45757576 |            | 0.457575758 |             |  | 0.4625              |
| ENSG00000143119 | 0.08682635 | 0.13414634 | 0.08682635 | 0.134146341 | 0.363095238 |  | 0.3313953 0.1686047 |
| ENSG00000164484 | 0.3258427  |            | 0.3258427  |             | 0.348837209 |  | 0.4666667           |
| ENSG00000105854 |            | 0.22222222 |            | 0.222222222 |             |  | 0.2159091           |
| ENSG00000107929 |            | 0.49090909 |            | 0.490909091 |             |  | 0.5                 |
| ENSG00000169918 | 0.19760479 | 0.4847561  | 0.19760479 | 0.484756098 | 0.246987952 |  | 0.3214286 0.3430233 |
| ENSG00000100221 |            | 0.29393939 |            | 0.293939394 |             |  | 0.4705882           |
| ENSG00000156639 |            | 0.14942529 |            | 0.149425287 |             |  | 0.2333333           |
| ENSG00000141433 | 0.41017964 | 0.28353659 | 0.41017964 | 0.283536585 | 0.083333333 |  | 0.1309524 0.2093023 |
| ENSG00000146425 | 0.19444444 |            | 0.19444444 |             | 0.244444444 |  | 0.2727273           |
| ENSG00000131849 | 0.36227545 | 0.47575758 | 0.36227545 | 0.475757576 |             |  | 0.244186            |
| ENSG00000121905 |            | 0.05151515 |            | 0.051515152 |             |  |                     |
| ENSG00000174780 |            | 0.31818182 |            | 0.318181818 |             |  | 0.3139535           |
| ENSG00000152268 | 0.11676647 | 0.32386364 | 0.11676647 | 0.323863636 |             |  | 0.4411765           |
| ENSG00000197841 |            | 0.32183908 |            | 0.32183908  |             |  | 0.4244186           |
| ENSG00000175485 | 0.48235294 | 0.06666667 | 0.48235294 | 0.066666667 |             |  | 0.1686047           |
| ENSG00000161405 |            | 0.46363636 |            | 0.463636364 |             |  | 0.372093            |
| ENSG00000148935 | 0.08383234 |            | 0.08383234 |             |             |  |                     |
| ENSG00000253379 |            | 0.33939394 |            | 0.339393939 |             |  | 0.3255814           |
| ENSG00000117090 | 0.11676647 | 0.4068323  | 0.11676647 | 0.406832298 | 0.36746988  |  | 0.2823529 0.3666667 |
| ENSG00000095951 |            |            |            |             |             |  | 0.3372093           |
| ENSG00000159166 |            | 0.06321839 |            | 0.063218391 |             |  |                     |
| ENSG00000019505 |            | 0.48181818 |            | 0.481818182 |             |  | 0.3882353           |
| ENSG00000230989 |            | 0.45151515 |            | 0.451515152 |             |  |                     |
| ENSG00000204252 | 0.13772455 | 0.43939394 | 0.13772455 | 0.439393939 | 0.154761905 |  | 0.2209302 0.4127907 |
| ENSG00000124216 |            | 0.28472222 |            | 0.284722222 |             |  | 0.3095238           |
| ENSG00000100385 | 0.45       | 0.32758621 | 0.45       | 0.327586207 | 0.279069767 |  | 0.3809524 0.3181818 |
| ENSG00000198851 |            |            |            |             | 0.25625     |  | 0.2386364 0.0568182 |
| ENSG00000067560 |            | 0.28963415 |            | 0.289634146 |             |  |                     |
| ENSG00000070886 |            | 0.32758621 |            | 0.327586207 |             |  | 0.3372093           |
| ENSG00000186452 |            | 0.19512195 |            | 0.195121951 |             |  | 0.2732558           |
| ENSG00000118322 | 0.36526946 | 0.29393939 | 0.36526946 | 0.293939394 | 0.345238095 |  | 0.3488372 0.244186  |
| ENSG00000103111 | 0.08682635 | 0.27878788 | 0.08682635 | 0.278787879 | 0.261904762 |  | 0.2790698 0.4418605 |
| ENSG00000171992 | 0.08181818 | 0.49695122 | 0.08181818 | 0.49695122  |             |  | 0.4883721           |
| ENSG00000155016 | 0.39506173 | 0.46470588 | 0.39506173 | 0.464705882 | 0.283783784 |  | 0.3625 0.3588235    |
| ENSG00000103194 |            | 0.32777778 |            | 0.327777778 | 0.351190476 |  | 0.377907 0.377907   |
| ENSG00000224201 |            |            |            |             |             |  | 0.4470588           |
| ENSG00000156206 |            |            |            |             |             |  | 0.1395349           |
| ENSG00000079393 | 0.45508982 | 0.42121212 | 0.45508982 | 0.421212121 | 0.410714286 |  | 0.4069767 0.4069767 |
| ENSG00000164037 | 0.29640719 | 0.47222222 | 0.29640719 | 0.472222222 | 0.452380952 |  | 0.4709302 0.5       |
| ENSG00000163216 |            | 0.49386503 |            | 0.493865031 | 0.470238095 |  | 0.4360465 0.4821429 |
| ENSG00000162885 |            | 0.46666667 |            | 0.466666667 | 0.159090909 |  | 0.0681818 0.4418605 |
| ENSG00000137494 | 0.33974359 | 0.46067416 | 0.33974359 | 0.460674157 | 0.055555556 |  | 0.4431818           |
| ENSG00000185591 |            | 0.07317073 |            | 0.073170732 |             |  |                     |
| ENSG00000135063 | 0.28571429 |            | 0.28571429 |             | 0.409638554 |  | 0.4761905           |
| ENSG00000037637 | 0.12349398 | 0.38050314 | 0.12349398 | 0.380503145 |             |  | 0.1882353           |

|                 |            |            |            |             |             |           |           |
|-----------------|------------|------------|------------|-------------|-------------|-----------|-----------|
| ENSG00000167487 |            | 0.32424242 |            | 0.324242424 |             |           | 0.3546512 |
| ENSG00000107104 | 0.34730539 | 0.3908046  | 0.34730539 | 0.390804598 | 0.432926829 | 0.4216867 | 0.494186  |
| ENSG00000161013 | 0.32634731 |            | 0.32634731 |             |             |           |           |
| ENSG00000227345 |            | 0.475      |            | 0.475       |             |           | 0.4352941 |
| ENSG00000148297 | 0.18562874 | 0.22727273 | 0.18562874 | 0.227272727 | 0.220238095 | 0.244186  | 0.3430233 |
| ENSG00000129151 | 0.3742515  | 0.1        | 0.3742515  | 0.1         | 0.482142857 | 0.4534884 |           |
| ENSG00000137500 | 0.11976048 | 0.46666667 | 0.11976048 | 0.466666667 | 0.452380952 | 0.4825581 | 0.2674419 |
| ENSG00000110400 |            |            |            |             |             |           | 0.0795455 |
| ENSG00000135211 |            | 0.31707317 |            | 0.317073171 |             |           | 0.2117647 |
| ENSG00000140395 |            | 0.13333333 |            | 0.133333333 |             |           | 0.1046512 |
| ENSG00000180992 |            | 0.1030303  |            | 0.103030303 |             |           |           |
| ENSG00000138769 |            | 0.40909091 |            | 0.409090909 |             |           | 0.0697674 |
| ENSG00000085719 | 0.42215569 | 0.36666667 | 0.42215569 | 0.366666667 | 0.398809524 | 0.4302326 | 0.4882353 |
| ENSG00000162669 | 0.17065868 |            | 0.17065868 |             |             |           |           |
| ENSG00000182566 | 0.24251497 |            | 0.24251497 |             |             |           |           |
| ENSG00000154813 |            | 0.46666667 |            | 0.466666667 |             |           | 0.4777778 |
| ENSG00000183873 |            | 0.31515152 |            | 0.315151515 |             |           | 0.5       |
| ENSG00000184293 |            | 0.45757576 |            | 0.457575758 |             |           | 0.3604651 |
| ENSG00000136848 | 0.11676647 | 0.09937888 | 0.11676647 | 0.099378882 |             |           |           |
| ENSG00000165006 |            | 0.31609195 |            | 0.316091954 |             |           | 0.3863636 |
| ENSG00000257198 | 0.38323353 |            | 0.38323353 |             | 0.339285714 | 0.3197674 |           |
| ENSG00000160182 |            |            |            |             | 0.416666667 | 0.4825581 |           |
| ENSG00000175779 |            | 0.43820225 |            | 0.438202247 |             |           | 0.4352941 |
| ENSG00000124279 |            | 0.26829268 |            | 0.268292683 |             |           | 0.2965116 |
| ENSG00000169297 |            | 0.1969697  |            | 0.196969697 |             |           | 0.3255814 |
| ENSG00000113643 | 0.23952096 | 0.37575758 | 0.23952096 | 0.375757576 | 0.107142857 | 0.1104651 | 0.1566265 |
| ENSG00000167183 |            | 0.36280488 |            | 0.362804878 |             |           | 0.4418605 |
| ENSG00000155659 |            | 0.1554878  |            | 0.155487805 |             |           | 0.1162791 |
| ENSG00000110042 |            | 0.43636364 |            | 0.436363636 |             |           | 0.4127907 |
| ENSG00000155380 |            | 0.39090909 |            | 0.390909091 |             |           | 0.327381  |
| ENSG00000135924 |            |            |            |             |             |           | 0.1590909 |
| ENSG00000197245 |            | 0.24545455 |            | 0.245454545 | 0.277777778 | 0.1704545 |           |
| ENSG00000179840 |            | 0.3597561  |            | 0.359756098 |             |           | 0.1       |
| ENSG00000141052 |            |            |            |             |             |           | 0.4695122 |
| ENSG00000163586 |            | 0.33128834 |            | 0.331288344 |             |           | 0.4709302 |
| ENSG00000055070 |            | 0.42727273 |            | 0.427272727 |             |           | 0.2732558 |
| ENSG00000158301 |            |            |            |             | 0.071428571 | 0.0588235 | 0.1453488 |
| ENSG00000151090 |            | 0.43333333 |            | 0.433333333 |             |           | 0.5       |
| ENSG00000164117 | 0.08383234 | 0.06969697 | 0.08383234 | 0.06969697  |             |           | 0.1144578 |
| ENSG00000132274 | 0.48192771 | 0.2        | 0.48192771 | 0.2         | 0.357142857 | 0.3863636 | 0.4127907 |
| ENSG00000138092 |            | 0.42378049 |            | 0.423780488 |             |           | 0.3139535 |
| ENSG00000016490 | 0.35889571 | 0.26060606 | 0.35889571 | 0.260606061 | 0.458333333 | 0.4825581 | 0.3953488 |
| ENSG00000126856 | 0.17771084 | 0.24848485 | 0.17771084 | 0.248484848 | 0.232142857 | 0.2965116 | 0.3546512 |
| ENSG00000186074 |            | 0.18787879 |            | 0.187878788 |             |           | 0.4593023 |
| ENSG00000112033 | 0.31137725 | 0.23939394 | 0.31137725 | 0.239393939 | 0.273809524 | 0.2267442 | 0.2325581 |
| ENSG00000232070 |            | 0.39444444 |            | 0.394444444 |             |           | 0.4772727 |
| ENSG00000132975 |            | 0.29090909 |            | 0.290909091 |             |           |           |
| ENSG00000196141 | 0.21856287 |            | 0.21856287 |             | 0.244444444 | 0.2613636 |           |
| ENSG00000085465 | 0.26646707 |            | 0.26646707 |             | 0.259036145 | 0.255814  |           |
| ENSG00000117151 |            | 0.2969697  |            | 0.296969697 |             |           | 0.1860465 |
| ENSG00000136197 |            | 0.12727273 |            | 0.127272727 |             |           | 0.0697674 |
| ENSG00000165478 |            | 0.35454545 |            | 0.354545455 |             |           | 0.0697674 |
| ENSG00000165868 |            | 0.26666667 |            | 0.266666667 |             |           | 0.25      |
| ENSG00000078098 | 0.05182927 |            | 0.05182927 |             |             |           | 0.1136364 |

|                 |            |            |            |             |             |  |           |           |
|-----------------|------------|------------|------------|-------------|-------------|--|-----------|-----------|
| ENSG00000112041 |            | 0.41818182 |            | 0.418181818 |             |  |           | 0.4883721 |
| ENSG00000198015 |            | 0.42682927 |            | 0.426829268 | 0.151162791 |  | 0.0941176 | 0.1453488 |
| ENSG00000186184 |            | 0.45731707 |            | 0.457317073 |             |  |           | 0.4883721 |
| ENSG00000196166 |            | 0.19090909 |            | 0.190909091 |             |  |           | 0.2151163 |
| ENSG00000162913 |            | 0.40116279 |            | 0.401162791 |             |  |           | 0.3571429 |
| ENSG00000147813 |            | 0.21666667 |            | 0.216666667 |             |  |           | 0.2727273 |
| ENSG00000166159 | 0.17365269 | 0.17272727 | 0.17365269 | 0.172727273 | 0.339285714 |  | 0.2965116 | 0.0523256 |
| ENSG00000215203 |            | 0.34705882 |            | 0.347058824 |             |  |           |           |
| ENSG00000141748 | 0.25449102 |            | 0.25449102 |             | 0.279761905 |  | 0.1918605 |           |
| ENSG00000137441 | 0.11976048 |            | 0.11976048 |             | 0.25        |  | 0.1976744 |           |
| ENSG00000069535 |            |            |            |             |             |  |           | 0.2647059 |
| ENSG00000184385 |            | 0.42987805 |            | 0.429878049 |             |  |           | 0.4470588 |
| ENSG00000148730 |            | 0.48888889 |            | 0.488888889 |             |  |           | 0.4659091 |
| ENSG00000184716 |            | 0.06666667 |            | 0.066666667 |             |  |           | 0.255814  |
| ENSG00000150347 |            |            |            |             | 0.166666667 |  | 0.1162791 | 0.1511628 |
| ENSG00000143164 |            | 0.35393258 |            | 0.353932584 |             |  |           | 0.1444444 |
| ENSG00000110375 | 0.17964072 |            | 0.17964072 |             |             |  |           |           |
| ENSG00000074660 |            |            |            |             |             |  |           | 0.0795455 |
| ENSG00000134962 |            | 0.48787879 |            | 0.487878788 |             |  |           | 0.4069767 |
| ENSG00000254790 |            | 0.38181818 |            | 0.381818182 |             |  |           | 0.3023256 |
| ENSG00000174748 |            | 0.17222222 |            | 0.172222222 |             |  |           | 0.0810811 |
| ENSG00000118564 |            | 0.38787879 |            | 0.387878788 |             |  |           | 0.4883721 |
| ENSG00000138738 |            | 0.27272727 |            | 0.272727273 |             |  |           | 0.2111111 |
| ENSG00000083123 |            | 0.23888889 |            | 0.238888889 |             |  |           | 0.2840909 |
| ENSG00000163902 | 0.46666667 |            | 0.46666667 |             | 0.244047619 |  | 0.1918605 |           |
| ENSG00000113194 | 0.11746988 | 0.38787879 | 0.11746988 | 0.387878788 |             |  |           | 0.4418605 |
| ENSG00000131459 |            | 0.23333333 |            | 0.233333333 |             |  |           | 0.3035714 |
| ENSG00000196218 | 0.11377246 |            | 0.11377246 |             |             |  |           |           |
| ENSG00000172349 | 0.45508982 | 0.49438202 | 0.45508982 | 0.494382022 | 0.428571429 |  | 0.372093  | 0.4941176 |
| ENSG00000108641 |            |            |            |             | 0.077777778 |  | 0.1136364 |           |
| ENSG00000096746 | 0.45209581 | 0.09393939 | 0.45209581 | 0.093939394 | 0.226190476 |  | 0.1162791 | 0.1162791 |
| ENSG00000165621 | 0.26704545 |            | 0.26704545 |             | 0.355555556 |  | 0.3636364 |           |
| ENSG00000100055 | 0.48502994 | 0.35632184 | 0.48502994 | 0.356321839 | 0.5         |  | 0.5       | 0.494186  |
| ENSG00000177551 | 0.5        | 0.43939394 | 0.5        | 0.439393939 | 0.452380952 |  | 0.4825581 | 0.4534884 |
| ENSG00000135482 | 0.49101796 |            | 0.49101796 |             |             |  |           |           |
| ENSG00000128191 |            | 0.48787879 |            | 0.487878788 |             |  |           | 0.4476744 |
| ENSG00000151348 | 0.39520958 |            | 0.39520958 |             | 0.202380952 |  | 0.2965116 |           |
| ENSG00000145287 | 0.38023952 | 0.11235955 | 0.38023952 | 0.112359551 | 0.375       |  | 0.3197674 |           |
| ENSG00000217825 |            | 0.20121951 |            | 0.201219512 |             |  |           | 0.1097561 |
| ENSG00000144028 |            | 0.32121212 |            | 0.321212121 |             |  |           | 0.3546512 |
| ENSG00000121350 | 0.47530864 | 0.5        | 0.47530864 | 0.5         | 0.476190476 |  | 0.4156627 | 0.372093  |
| ENSG00000198324 |            | 0.34242424 |            | 0.342424242 |             |  |           | 0.1976744 |
| ENSG00000131653 |            | 0.05521472 |            | 0.055214724 |             |  |           |           |
| ENSG00000158850 |            | 0.21666667 |            | 0.216666667 |             |  |           | 0.4545455 |
| ENSG00000105887 |            | 0.08181818 |            | 0.081818182 |             |  |           | 0.0988372 |
| ENSG00000136874 | 0.27245509 | 0.33333333 | 0.27245509 | 0.333333333 | 0.285714286 |  | 0.2325581 | 0.2209302 |
| ENSG00000143543 | 0.13173653 |            | 0.13173653 |             |             |  |           |           |
| ENSG00000215131 |            |            |            |             |             |  |           | 0.0568182 |
| ENSG00000242574 |            | 0.44545455 |            | 0.445454545 |             |  |           | 0.4767442 |
| ENSG00000187607 | 0.07317073 | 0.41818182 | 0.07317073 | 0.418181818 |             |  |           | 0.4127907 |
| ENSG00000115339 |            | 0.47777778 |            | 0.477777778 |             |  |           | 0.2444444 |
| ENSG00000172159 |            | 0.48407643 |            | 0.484076433 |             |  |           | 0.4011628 |
| ENSG00000120306 | 0.12222222 |            | 0.12222222 |             | 0.261363636 |  | 0.3068182 |           |
| ENSG00000163116 |            | 0.3        |            | 0.3         |             |  |           | 0.2616279 |

|                 |            |            |            |             |             |           |           |
|-----------------|------------|------------|------------|-------------|-------------|-----------|-----------|
| ENSG00000107140 | 0.45209581 |            | 0.45209581 |             | 0.392857143 |           | 0.3837209 |
| ENSG00000135678 |            | 0.40243902 |            | 0.402439024 |             |           | 0.3546512 |
| ENSG00000132970 |            | 0.29090909 |            | 0.290909091 |             |           | 0.0581395 |
| ENSG00000175121 |            | 0.32727273 |            | 0.327272727 |             |           | 0.0872093 |
| ENSG00000073111 |            | 0.21515152 |            | 0.215151515 |             |           | 0.3430233 |
| ENSG00000104368 | 0.46706587 | 0.0945122  | 0.46706587 | 0.094512195 | 0.321428571 | 0.3197674 | 0.1588235 |
| ENSG00000137819 |            | 0.06896552 |            | 0.068965517 |             |           | 0.3953488 |
| ENSG00000142611 |            | 0.23636364 |            | 0.236363636 |             |           | 0.4880952 |
| ENSG00000054611 |            | 0.46969697 |            | 0.46969697  |             |           | 0.4534884 |
| ENSG00000148798 |            | 0.46629213 |            | 0.466292135 |             |           | 0.4431818 |
| ENSG00000143493 |            | 0.25151515 |            | 0.251515152 |             |           | 0.4764706 |
| ENSG00000151743 | 0.23053892 | 0.4        | 0.23053892 | 0.4         | 0.125       | 0.1104651 | 0.1162791 |
| ENSG00000164086 |            | 0.06060606 |            | 0.060606061 |             |           | 0.377907  |
| ENSG00000175727 | 0.44578313 | 0.49393939 | 0.44578313 | 0.493939394 | 0.43452381  | 0.4186047 | 0.4069767 |
| ENSG00000104412 | 0.0508982  |            | 0.0508982  |             | 0.458333333 | 0.4       |           |
| ENSG00000168597 |            | 0.32758621 |            | 0.327586207 | 0.226190476 | 0.3139535 | 0.2727273 |
| ENSG00000064270 |            | 0.11890244 |            | 0.118902439 |             |           | 0.4244186 |
| ENSG00000177335 |            | 0.28787879 |            | 0.287878788 |             |           | 0.0523256 |
| ENSG00000163032 | 0.2754491  | 0.31212121 | 0.2754491  | 0.312121212 | 0.097560976 | 0.1176471 |           |
| ENSG00000111796 |            | 0.46111111 |            | 0.461111111 |             |           | 0.5       |
| ENSG00000111058 |            | 0.30674847 |            | 0.306748466 |             |           | 0.4476744 |
| ENSG00000152061 | 0.34444444 | 0.30606061 | 0.34444444 | 0.306060606 |             | 0.0909091 | 0.4593023 |
| ENSG00000055957 |            | 0.2969697  |            | 0.296969697 |             |           | 0.4647059 |
| ENSG00000197580 | 0.09281437 | 0.24545455 | 0.09281437 | 0.245454545 | 0.457831325 | 0.4127907 | 0.1918605 |
| ENSG00000140859 | 0.20359281 |            | 0.20359281 |             | 0.416666667 | 0.3176471 |           |
| ENSG00000177613 |            | 0.16363636 |            | 0.163636364 |             |           | 0.3372093 |
| ENSG00000106128 | 0.20783133 |            | 0.20783133 |             | 0.18452381  | 0.1744186 |           |
| ENSG00000133115 |            | 0.25925926 |            | 0.259259259 |             |           | 0.3511905 |
| ENSG00000117620 | 0.0508982  | 0.18787879 | 0.0508982  | 0.187878788 | 0.06547619  |           | 0.0872093 |
| ENSG00000146535 | 0.11666667 | 0.48850575 | 0.11666667 | 0.488505747 | 0.3         | 0.2       | 0.3953488 |
| ENSG00000152455 | 0.27108434 | 0.09090909 | 0.27108434 | 0.090909091 | 0.410714286 | 0.3895349 |           |
| ENSG00000183508 |            | 0.36666667 |            | 0.366666667 |             |           | 0.3023256 |
| ENSG00000176208 | 0.10493827 |            | 0.10493827 |             | 0.125       | 0.2916667 |           |
| ENSG00000174562 |            | 0.25757576 |            | 0.257575758 |             |           | 0.4235294 |
| ENSG00000133800 |            | 0.37575758 |            | 0.375757576 |             |           | 0.3430233 |
| ENSG00000103066 | 0.18888889 | 0.27777778 | 0.18888889 | 0.277777778 |             |           | 0.0568182 |
| ENSG00000111653 |            |            |            |             |             |           | 0.3470588 |
| ENSG00000102362 |            | 0.41666667 |            | 0.416666667 |             |           | 0.494186  |
| ENSG00000170160 |            | 0.1        |            | 0.1         |             |           |           |
| ENSG00000163347 | 0.20689655 | 0.47169811 | 0.20689655 | 0.471698113 | 0.151162791 | 0.1363636 | 0.1585366 |
| ENSG00000138650 |            | 0.38650307 |            | 0.386503067 |             |           | 0.4821429 |
| ENSG00000059691 |            | 0.47256098 |            | 0.472560976 |             |           | 0.4825581 |
| ENSG00000258945 |            | 0.48787879 |            | 0.487878788 |             |           | 0.3647059 |
| ENSG00000175497 | 0.23353293 | 0.47575758 | 0.23353293 | 0.475757576 |             |           | 0.4534884 |
| ENSG00000070269 | 0.36046512 | 0.31212121 | 0.36046512 | 0.312121212 | 0.458333333 | 0.4186047 | 0.2965116 |
| ENSG00000104974 |            | 0.35151515 |            | 0.351515152 |             |           | 0.3953488 |
| ENSG00000140519 |            | 0.46646341 |            | 0.466463415 |             |           | 0.2965116 |
| ENSG00000145779 | 0.28742515 | 0.29444444 | 0.28742515 | 0.294444444 | 0.494047619 | 0.4651163 | 0.1117647 |
| ENSG00000197714 |            | 0.47878788 |            | 0.478787879 |             |           | 0.1802326 |
| ENSG00000257923 | 0.49101796 | 0.45426829 | 0.49101796 | 0.454268293 | 0.089285714 |           | 0.0755814 |
| ENSG00000138162 | 0.39655172 | 0.22121212 | 0.39655172 | 0.221212121 | 0.327380952 | 0.4069767 | 0.2093023 |
| ENSG00000197632 | 0.06111111 | 0.23333333 | 0.06111111 | 0.233333333 | 0.232142857 | 0.1395349 | 0.3352941 |
| ENSG00000120805 | 0.2        | 0.20909091 | 0.2        | 0.209090909 | 0.446428571 | 0.3522727 | 0.3488372 |
| ENSG00000101160 |            | 0.26666667 |            | 0.266666667 |             |           | 0.0813953 |

|                 |            |            |            |             |             |           |           |
|-----------------|------------|------------|------------|-------------|-------------|-----------|-----------|
| ENSG00000175182 | 0.41616766 | 0.37272727 | 0.41616766 | 0.372727273 | 0.404761905 | 0.4360465 | 0.25      |
| ENSG00000182504 |            | 0.34146341 |            | 0.341463415 |             |           | 0.3372093 |
| ENSG00000198077 | 0.27777778 |            | 0.27777778 |             | 0.477777778 | 0.4431818 |           |
| ENSG00000100146 |            | 0.33128834 |            | 0.331288344 |             |           | 0.3294118 |
| ENSG00000049759 | 0.46107784 | 0.41212121 | 0.46107784 | 0.412121212 | 0.494047619 | 0.3197674 | 0.25      |
| ENSG00000185238 |            |            |            |             |             |           | 0.0795455 |
| ENSG00000003756 |            | 0.47272727 |            | 0.472727273 |             |           | 0.1802326 |
| ENSG00000174502 |            | 0.12222222 |            | 0.122222222 |             |           | 0.4545455 |
| ENSG00000179088 | 0.26404494 | 0.23888889 | 0.26404494 | 0.238888889 | 0.454545455 | 0.4886364 | 0.4659091 |
| ENSG00000170027 |            | 0.23636364 |            | 0.236363636 |             |           | 0.2906977 |
| ENSG00000177575 |            | 0.48773006 |            | 0.487730061 |             |           | 0.3882353 |
| ENSG00000145780 |            | 0.46363636 |            | 0.463636364 |             |           | 0.4302326 |
| ENSG00000244045 |            | 0.47272727 |            | 0.472727273 |             |           | 0.2267442 |
| ENSG00000197706 | 0.0748503  |            | 0.0748503  |             | 0.095238095 | 0.0813953 | 0.0813953 |
| ENSG00000171150 |            | 0.34756098 |            | 0.347560976 |             |           | 0.0581395 |
| ENSG00000100842 |            | 0.25304878 |            | 0.25304878  |             |           | 0.2674419 |
| ENSG00000095261 |            | 0.13636364 |            | 0.136363636 |             |           |           |
| ENSG00000115504 |            | 0.13030303 |            | 0.13030303  |             |           | 0.122093  |
| ENSG00000156510 |            | 0.45       |            | 0.45        |             |           | 0.2727273 |
| ENSG00000099901 |            | 0.28181818 |            | 0.281818182 |             | 0.0909091 | 0.1453488 |
| ENSG00000141971 |            |            |            |             | 0.41025641  | 0.4428571 |           |
| ENSG00000149124 |            | 0.17378049 |            | 0.173780488 |             |           | 0.4011628 |
| ENSG00000188389 |            | 0.12121212 |            | 0.121212121 |             |           | 0.4883721 |
| ENSG00000068079 |            | 0.11818182 |            | 0.118181818 |             |           |           |
| ENSG00000069943 | 0.29640719 | 0.08787879 | 0.29640719 | 0.087878788 | 0.452380952 | 0.4186047 |           |
| ENSG00000136603 | 0.42215569 | 0.12777778 | 0.42215569 | 0.127777778 | 0.192771084 | 0.1411765 |           |
| ENSG00000171848 |            | 0.15853659 |            | 0.158536585 | 0.366666667 | 0.3522727 |           |
| ENSG00000058262 | 0.05988024 | 0.25       | 0.05988024 | 0.25        |             |           | 0.0843373 |
| ENSG00000072274 |            | 0.38787879 |            | 0.387878788 |             |           | 0.2209302 |
| ENSG00000124587 | 0.35628743 | 0.45151515 | 0.35628743 | 0.451515152 | 0.113095238 | 0.1453488 | 0.1453488 |
| ENSG00000116218 |            | 0.26060606 |            | 0.260606061 |             |           | 0.4069767 |
| ENSG00000108175 | 0.0988024  | 0.36781609 | 0.0988024  | 0.367816092 | 0.446428571 | 0.3430233 | 0.4888889 |
| ENSG00000155324 |            | 0.18181818 |            | 0.181818182 |             |           | 0.0523256 |
| ENSG00000162231 |            | 0.35151515 |            | 0.351515152 |             |           | 0.3941176 |
| ENSG00000070366 |            | 0.35632184 |            | 0.356321839 |             |           | 0.0755814 |
| ENSG00000116698 |            | 0.36781609 |            | 0.367816092 |             |           | 0.4772727 |
| ENSG00000133401 | 0.2245509  | 0.29878049 | 0.2245509  | 0.298780488 | 0.095238095 | 0.0813953 | 0.3372093 |
| ENSG00000185513 | 0.48802395 | 0.48275862 | 0.48802395 | 0.482758621 | 0.43452381  | 0.4651163 | 0.4825581 |
| ENSG00000144560 |            |            |            |             | 0.06547619  | 0.1369048 | 0.1369048 |
| ENSG00000147526 | 0.34730539 | 0.14634146 | 0.34730539 | 0.146341463 | 0.25        | 0.1941176 | 0.2058824 |
| ENSG00000134508 |            | 0.49090909 |            | 0.490909091 |             |           | 0.494186  |
| ENSG00000172530 |            | 0.25757576 |            | 0.257575758 |             | 0.0581395 | 0.2616279 |
| ENSG00000138622 |            | 0.33939394 |            | 0.339393939 |             |           | 0.4821429 |
| ENSG00000118515 |            | 0.42424242 |            | 0.424242424 | 0.055555556 | 0.0777778 | 0.4764706 |
| ENSG00000144827 | 0.17664671 | 0.21666667 | 0.17664671 | 0.216666667 | 0.142857143 | 0.122093  | 0.122093  |
| ENSG00000188833 |            | 0.29573171 |            | 0.295731707 |             |           | 0.2906977 |
| ENSG00000186275 |            | 0.14197531 |            | 0.141975309 |             |           | 0.2162162 |
| ENSG00000175471 | 0.36826347 | 0.30813953 | 0.36826347 | 0.308139535 | 0.470238095 | 0.4302326 | 0.3863636 |
| ENSG00000116701 | 0.48502994 | 0.1        | 0.48502994 | 0.1         | 0.071428571 | 0.0581395 |           |
| ENSG00000188452 |            | 0.31515152 |            | 0.315151515 |             |           | 0.4476744 |
| ENSG00000051523 |            | 0.43333333 |            | 0.433333333 |             |           | 0.4651163 |
| ENSG00000196345 | 0.42814371 | 0.28735632 | 0.42814371 | 0.287356322 |             |           |           |
| ENSG00000205809 |            | 0.16770186 |            | 0.167701863 |             |           | 0.2321429 |
| ENSG00000184999 | 0.24096386 | 0.47560976 | 0.24096386 | 0.475609756 | 0.446428571 | 0.3941176 | 0.3953488 |



|                 |            |            |            |             |             |           |           |
|-----------------|------------|------------|------------|-------------|-------------|-----------|-----------|
| ENSG0000048540  | 0.05555556 |            | 0.05555556 |             |             |           |           |
| ENSG0000010165  | 0.33832335 | 0.26969697 | 0.33832335 | 0.26969697  | 0.369047619 | 0.372093  | 0.4647059 |
| ENSG0000066923  | 0.40555556 | 0.45731707 | 0.40555556 | 0.457317073 | 0.422222222 | 0.4090909 | 0.3170732 |
| ENSG00000174951 | 0.10479042 | 0.24848485 | 0.10479042 | 0.248484848 |             |           | 0.3255814 |
| ENSG00000107372 |            | 0.47852761 |            | 0.478527607 |             |           | 0.5       |
| ENSG00000114853 | 0.46226415 | 0.33435583 | 0.46226415 | 0.334355828 | 0.476190476 | 0.3554217 | 0.4146341 |
| ENSG0000084628  |            | 0.27878788 |            | 0.278787879 |             |           | 0.4823529 |
| ENSG00000144749 |            |            |            |             |             |           | 0.0666667 |
| ENSG00000185909 |            | 0.24242424 |            | 0.242424242 |             |           |           |
| ENSG00000073803 | 0.27840909 | 0.46363636 | 0.27840909 | 0.463636364 | 0.122222222 | 0.1477273 | 0.4111111 |
| ENSG00000223547 | 0.30606061 | 0.49371069 | 0.30606061 | 0.493710692 | 0.1         | 0.1337209 | 0.4880952 |
| ENSG00000070061 | 0.34090909 | 0.30606061 | 0.34090909 | 0.306060606 | 0.5         | 0.4318182 | 0.4529412 |
| ENSG00000206053 |            | 0.05555556 |            | 0.055555556 |             |           | 0.1136364 |
| ENSG00000001626 |            | 0.28333333 |            | 0.283333333 |             |           |           |
| ENSG00000074416 | 0.23053892 | 0.40490798 | 0.23053892 | 0.404907975 |             |           | 0.375     |
| ENSG00000081051 |            | 0.42121212 |            | 0.421212121 |             |           | 0.3372093 |
| ENSG00000092054 |            | 0.05454545 |            | 0.054545455 |             |           | 0.0523256 |
| ENSG00000113068 |            | 0.27272727 |            | 0.272727273 |             |           | 0.372093  |
| ENSG00000164946 | 0.4        | 0.3902439  | 0.4        | 0.390243902 | 0.38372093  | 0.4054054 | 0.494186  |
| ENSG00000187118 |            | 0.29090909 |            | 0.290909091 |             |           | 0.2529412 |
| ENSG00000125648 |            | 0.49390244 |            | 0.493902439 | 0.055555556 |           | 0.3294118 |
| ENSG00000125798 |            |            |            |             |             |           | 0.2267442 |
| ENSG00000109917 |            | 0.11890244 |            | 0.118902439 |             |           | 0.3313953 |
| ENSG00000106537 | 0.40963855 | 0.25914634 | 0.40963855 | 0.259146341 | 0.25        | 0.1860465 | 0.3023256 |
| ENSG00000144840 | 0.20658683 |            | 0.20658683 |             | 0.130952381 | 0.2267442 |           |
| ENSG00000164587 | 0.26136364 | 0.32424242 | 0.26136364 | 0.324242424 | 0.288888889 | 0.2727273 | 0.244186  |
| ENSG00000168234 | 0.44311377 | 0.37222222 | 0.44311377 | 0.372222222 | 0.458333333 | 0.4127907 | 0.4222222 |
| ENSG00000015520 |            | 0.17878788 |            | 0.178787879 |             |           |           |
| ENSG00000162520 |            |            |            |             | 0.107142857 | 0.1104651 | 0.1046512 |
| ENSG00000124089 | 0.41616766 |            | 0.41616766 |             | 0.226190476 | 0.2267442 |           |
| ENSG00000198755 |            |            |            |             |             |           | 0.0930233 |
| ENSG00000187778 |            | 0.06707317 |            | 0.067073171 |             |           | 0.0777778 |
| ENSG00000164692 |            | 0.10060976 |            | 0.100609756 |             |           | 0.122093  |
| ENSG00000101384 | 0.33832335 | 0.41515152 | 0.33832335 | 0.415151515 | 0.155555556 | 0.2666667 | 0.2674419 |
| ENSG00000168917 | 0.38922156 |            | 0.38922156 |             | 0.148809524 | 0.1395349 |           |
| ENSG00000100934 | 0.07954545 | 0.12777778 | 0.07954545 | 0.127777778 | 0.344444444 | 0.3333333 | 0.4090909 |
| ENSG00000178965 |            | 0.36666667 |            | 0.366666667 |             |           | 0.4127907 |
| ENSG00000173926 |            | 0.4202454  |            | 0.420245399 |             |           | 0.3963415 |
| ENSG00000198130 | 0.29216867 |            | 0.29216867 |             | 0.458333333 | 0.4883721 |           |
| ENSG00000117115 |            | 0.32941176 |            | 0.329411765 |             |           | 0.4117647 |
| ENSG00000197430 |            | 0.18787879 |            | 0.187878788 |             |           | 0.3988095 |
| ENSG00000152689 | 0.46706587 | 0.26363636 | 0.46706587 | 0.263636364 | 0.28313253  | 0.3139535 | 0.0697674 |
| ENSG00000076770 |            | 0.29393939 |            | 0.293939394 |             |           | 0.0581395 |
| ENSG00000205636 | 0.36309524 |            | 0.36309524 |             |             | 0.1341463 |           |
| ENSG00000125356 | 0.16768293 |            | 0.16768293 |             | 0.178571429 | 0.125     |           |
| ENSG00000151893 |            | 0.14117647 |            | 0.141176471 |             |           | 0.2176471 |
| ENSG00000130518 | 0.43413174 |            | 0.43413174 |             | 0.488095238 | 0.4883721 |           |
| ENSG00000142449 | 0.0988024  | 0.14444444 | 0.0988024  | 0.144444444 | 0.172619048 | 0.1918605 | 0.3636364 |
| ENSG00000197683 | 0.44311377 | 0.13939394 | 0.44311377 | 0.139393939 | 0.083333333 | 0.0697674 | 0.4302326 |
| ENSG00000139865 |            | 0.46666667 |            | 0.466666667 |             |           | 0.4117647 |
| ENSG00000140374 |            | 0.47159091 |            | 0.471590909 |             |           | 0.3255814 |
| ENSG00000079112 |            | 0.48484848 |            | 0.484848485 |             |           | 0.4825581 |
| ENSG00000184984 | 0.21556886 |            | 0.21556886 |             | 0.071428571 | 0.1337209 |           |
| ENSG00000145826 | 0.4760479  | 0.37804878 | 0.4760479  | 0.37804878  | 0.363095238 | 0.3895349 | 0.4186047 |

|                 |            |            |            |             |             |           |           |
|-----------------|------------|------------|------------|-------------|-------------|-----------|-----------|
| ENSG00000137693 | 0.17771084 | 0.35057471 | 0.17771084 | 0.350574713 | 0.261904762 | 0.2151163 | 0.5       |
| ENSG00000187068 |            | 0.14723926 |            | 0.147239264 |             |           | 0.1337209 |
| ENSG00000187024 | 0.24251497 |            | 0.24251497 |             | 0.261904762 | 0.2906977 |           |
| ENSG00000135749 | 0.41017964 | 0.24848485 | 0.41017964 | 0.248484848 | 0.232142857 | 0.2117647 | 0.2294118 |
| ENSG00000157927 | 0.05757576 | 0.32183908 | 0.05757576 | 0.32183908  | 0.469879518 | 0.4709302 | 0.3522727 |
| ENSG00000181195 | 0.16666667 | 0.44848485 | 0.16666667 | 0.448484848 |             |           | 0.3511905 |
| ENSG00000039600 |            | 0.08950617 |            | 0.089506173 |             |           |           |
| ENSG00000168066 | 0.14371257 | 0.11515152 | 0.14371257 | 0.115151515 | 0.404761905 | 0.3662791 | 0.3895349 |
| ENSG00000156222 | 0.0748503  | 0.12121212 | 0.0748503  | 0.121212121 |             |           | 0.0523256 |
| ENSG00000122033 |            |            |            |             | 0.06547619  | 0.0988372 |           |
| ENSG00000072954 |            | 0.12921348 |            | 0.129213483 |             |           | 0.0666667 |
| ENSG00000069812 |            | 0.13333333 |            | 0.133333333 |             |           | 0.2616279 |
| ENSG00000136068 |            | 0.48484848 |            | 0.484848485 |             |           |           |
| ENSG00000165714 |            | 0.39393939 |            | 0.393939394 |             |           | 0.2209302 |
| ENSG00000180061 | 0.42814371 |            | 0.42814371 |             | 0.077380952 | 0.0588235 |           |
| ENSG00000164758 | 0.4251497  |            | 0.4251497  |             | 0.255952381 | 0.244186  |           |
| ENSG00000163683 |            |            |            |             |             |           | 0.1204819 |
| ENSG00000100852 |            | 0.10555556 |            | 0.105555556 |             |           | 0.1477273 |
| ENSG00000136108 |            | 0.39506173 |            | 0.395061728 |             |           | 0.3488372 |
| ENSG00000105341 | 0.17777778 |            | 0.17777778 |             | 0.443181818 | 0.4545455 |           |
| ENSG00000145041 |            | 0.17878788 |            | 0.178787879 |             |           | 0.2117647 |
| ENSG00000149548 | 0.1497006  | 0.36363636 | 0.1497006  | 0.363636364 | 0.297619048 | 0.255814  | 0.4352941 |
| ENSG00000119812 |            | 0.27607362 |            | 0.27607362  |             |           | 0.4069767 |
| ENSG00000100426 |            | 0.18888889 |            | 0.188888889 |             |           | 0.2093023 |
| ENSG00000104852 | 0.15269461 | 0.13030303 | 0.15269461 | 0.13030303  | 0.125       | 0.0639535 | 0.0639535 |
| ENSG00000184271 | 0.0625     | 0.43333333 | 0.0625     | 0.433333333 | 0.155555556 | 0.0568182 | 0.3636364 |
| ENSG00000143797 |            | 0.28181818 |            | 0.281818182 |             |           | 0.0930233 |
| ENSG00000147889 |            | 0.13333333 |            | 0.133333333 |             |           | 0.0639535 |
| ENSG00000026025 |            | 0.36111111 |            | 0.361111111 |             |           | 0.244186  |
| ENSG00000183011 |            |            |            |             | 0.392857143 | 0.4069767 |           |
| ENSG00000078237 |            | 0.40606061 |            | 0.406060606 |             |           | 0.4939759 |
| ENSG00000142224 | 0.23888889 | 0.24545455 | 0.23888889 | 0.245454545 | 0.255555556 | 0.2272727 | 0.3953488 |
| ENSG00000072840 |            | 0.44545455 |            | 0.445454545 |             |           | 0.2325581 |
| ENSG00000129197 | 0.28614458 | 0.21212121 | 0.28614458 | 0.212121212 | 0.054216867 |           | 0.2235294 |
| ENSG00000130775 |            | 0.38650307 |            | 0.386503067 |             |           | 0.422619  |
| ENSG00000173166 |            | 0.42121212 |            | 0.421212121 |             |           | 0.4418605 |
| ENSG00000158156 |            |            |            |             | 0.25        |           |           |
| ENSG00000183747 |            | 0.21111111 |            | 0.211111111 |             |           | 0.4431818 |
| ENSG00000255216 | 0.32954545 |            | 0.32954545 |             | 0.488636364 | 0.4333333 |           |
| ENSG00000163435 | 0.48502994 | 0.32121212 | 0.48502994 | 0.321212121 | 0.5         | 0.4011628 | 0.3546512 |
| ENSG00000148848 |            | 0.4695122  |            | 0.469512195 |             |           | 0.3764706 |
| ENSG00000184564 | 0.30239521 | 0.35393258 | 0.30239521 | 0.353932584 | 0.119047619 | 0.2823529 | 0.4375    |
| ENSG00000171564 | 0.11976048 | 0.21666667 | 0.11976048 | 0.216666667 | 0.19047619  | 0.1162791 | 0.125     |
| ENSG00000170788 |            | 0.13333333 |            | 0.133333333 |             | 0.0666667 |           |
| ENSG00000232838 |            | 0.09393939 |            | 0.093939394 |             |           | 0.2151163 |
| ENSG00000006757 |            | 0.45121951 |            | 0.451219512 |             |           | 0.3023256 |
| ENSG00000182010 | 0.06886228 | 0.43888889 | 0.06886228 | 0.438888889 |             |           | 0.1463415 |
| ENSG00000161640 |            | 0.23030303 |            | 0.23030303  |             |           | 0.2906977 |
| ENSG00000198739 | 0.36516854 |            | 0.36516854 |             |             |           |           |
| ENSG00000162736 | 0.29041916 |            | 0.29041916 |             | 0.060240964 | 0.0581395 |           |
| ENSG00000143420 |            | 0.47777778 |            | 0.477777778 |             |           | 0.3546512 |
| ENSG00000171522 |            | 0.13333333 |            | 0.133333333 |             |           | 0.3139535 |
| ENSG00000104964 |            | 0.2969697  |            | 0.296969697 |             |           | 0.1046512 |
| ENSG00000108861 |            | 0.27272727 |            | 0.272727273 |             |           | 0.1569767 |

|                 |            |            |            |             |             |                     |
|-----------------|------------|------------|------------|-------------|-------------|---------------------|
| ENSG00000116991 | 0.25757576 | 0.20909091 | 0.25757576 | 0.209090909 |             |                     |
| ENSG00000126883 | 0.46666667 |            | 0.46666667 |             | 0.433333333 | 0.4545455           |
| ENSG00000189190 | 0.09444444 |            | 0.09444444 |             | 0.077777778 | 0.127907 0.3068182  |
| ENSG00000186298 | 0.39325843 | 0.13719512 | 0.39325843 | 0.137195122 |             | 0.0523256 0.0523256 |
| ENSG00000118707 |            | 0.12424242 |            | 0.124242424 |             | 0.2151163           |
| ENSG00000067900 | 0.44610778 |            | 0.44610778 |             | 0.077380952 | 0.1337209           |
| ENSG00000143384 |            | 0.42222222 |            | 0.422222222 |             | 0.3977273           |
| ENSG00000141977 |            | 0.2030303  |            | 0.203030303 |             | 0.0639535           |
| ENSG00000151150 | 0.26646707 | 0.44545455 | 0.26646707 | 0.445454545 | 0.244047619 | 0.2034884 0.1744186 |
| ENSG00000116473 | 0.21257485 | 0.17272727 | 0.21257485 | 0.172727273 |             | 0.1162791           |
| ENSG00000068120 | 0.07185629 | 0.41818182 | 0.07185629 | 0.418181818 |             | 0.4476744           |
| ENSG00000133574 | 0.29341317 |            | 0.29341317 |             | 0.05952381  | 0.0523256 0.0523256 |
| ENSG00000083454 |            | 0.12121212 |            | 0.121212121 |             | 0.2325581           |
| ENSG00000151376 |            | 0.34756098 |            | 0.347560976 |             | 0.3662791           |
| ENSG00000180353 |            | 0.30792683 |            | 0.307926829 |             | 0.4069767           |
| ENSG00000105245 |            | 0.13636364 |            | 0.136363636 |             |                     |
| ENSG00000100335 |            | 0.32424242 |            | 0.324242424 |             | 0.1309524           |
| ENSG00000088179 | 0.3742515  | 0.30368098 | 0.3742515  | 0.303680982 | 0.238095238 | 0.1627907 0.1627907 |
| ENSG00000168214 | 0.11111111 | 0.1097561  | 0.11111111 | 0.109756098 | 0.288888889 | 0.3409091           |
| ENSG00000149212 |            | 0.39393939 |            | 0.393939394 |             | 0.3953488           |
| ENSG00000005469 |            | 0.1030303  |            | 0.103030303 |             |                     |
| ENSG00000135709 |            | 0.4847561  |            | 0.484756098 |             | 0.3555556           |
| ENSG00000196730 |            | 0.45151515 |            | 0.451515152 |             | 0.4235294           |
| ENSG00000186513 |            | 0.30606061 |            | 0.306060606 |             | 0.3255814           |
| ENSG00000167740 |            | 0.28484848 |            | 0.284848485 |             | 0.0697674           |
| ENSG00000150076 | 0.30606061 | 0.47865854 | 0.30606061 | 0.478658537 | 0.140243902 | 0.172619 0.1046512  |
| ENSG00000137809 |            | 0.32608696 |            | 0.326086957 |             |                     |
| ENSG00000082458 |            | 0.40243902 |            | 0.402439024 |             | 0.3235294           |
| ENSG00000139318 | 0.23333333 | 0.19393939 | 0.23333333 | 0.193939394 |             |                     |
| ENSG00000136933 | 0.49101796 | 0.05151515 | 0.49101796 | 0.051515152 | 0.357142857 | 0.4011628 0.1162791 |
| ENSG00000163630 | 0.08888889 | 0.3969697  | 0.08888889 | 0.396969697 | 0.066666667 | 0.2848837           |
| ENSG00000156011 | 0.09444444 | 0.41212121 | 0.09444444 | 0.412121212 |             | 0.2529412           |
| ENSG00000112149 |            | 0.46060606 |            | 0.460606061 |             | 0.4647059           |
| ENSG00000007047 |            | 0.3        |            | 0.3         |             | 0.2616279           |
| ENSG00000155158 | 0.30838323 |            | 0.30838323 |             |             | 0.0639535           |
| ENSG00000141540 | 0.23053892 | 0.2        | 0.23053892 | 0.2         | 0.089285714 | 0.1511628 0.0666667 |
| ENSG00000185940 |            | 0.35714286 |            | 0.357142857 |             | 0.4011628           |
| ENSG00000145715 | 0.17791411 |            | 0.17791411 |             | 0.426829268 | 0.3837209           |
| ENSG00000165733 |            | 0.3030303  |            | 0.303030303 |             | 0.4534884           |
| ENSG00000182919 | 0.35928144 | 0.24848485 | 0.35928144 | 0.248484848 | 0.071428571 | 0.0988372           |
| ENSG00000130164 |            | 0.43636364 |            | 0.436363636 |             | 0.4709302           |
| ENSG00000176406 |            | 0.32222222 |            | 0.322222222 |             |                     |
| ENSG00000180596 |            | 0.45151515 |            | 0.451515152 |             | 0.1686047           |
| ENSG00000151689 | 0.26111111 |            | 0.26111111 |             | 0.482142857 | 0.5                 |
| ENSG00000124818 | 0.28443114 | 0.3030303  | 0.28443114 | 0.303030303 | 0.083333333 | 0.1511628           |
| ENSG00000143248 |            | 0.39090909 |            | 0.390909091 |             | 0.4588235           |
| ENSG00000144406 |            | 0.43939394 |            | 0.439393939 |             | 0.4882353           |
| ENSG00000187510 | 0.32035928 | 0.12222222 | 0.32035928 | 0.122222222 | 0.107142857 | 0.0581395 0.054878  |
| ENSG00000106290 | 0.43820225 | 0.36516854 | 0.43820225 | 0.365168539 | 0.122222222 | 0.1363636 0.1333333 |
| ENSG00000130147 |            |            |            |             | 0.089285714 |                     |
| ENSG00000188827 |            | 0.13333333 |            | 0.133333333 |             |                     |
| ENSG00000154358 | 0.4969697  | 0.3969697  | 0.4969697  | 0.396969697 | 0.476190476 | 0.4222222 0.3181818 |
| ENSG00000197641 |            | 0.32121212 |            | 0.321212121 |             | 0.4127907           |
| ENSG00000031003 |            | 0.22727273 |            | 0.227272727 |             |                     |

|                 |            |            |            |             |             |           |           |
|-----------------|------------|------------|------------|-------------|-------------|-----------|-----------|
| ENSG0000082512  |            | 0.14444444 |            | 0.14444444  |             |           |           |
| ENSG00000121579 | 0.29213483 |            | 0.29213483 |             | 0.42222222  |           | 0.3636364 |
| ENSG00000157870 |            | 0.35757576 |            | 0.35757578  |             |           | 0.3488372 |
| ENSG0000070081  |            | 0.34545455 |            | 0.34545454  | 0.053571429 | 0.0639535 | 0.3546512 |
| ENSG00000182718 | 0.32035928 |            | 0.32035928 |             | 0.101190476 |           |           |
| ENSG00000128342 |            | 0.38484848 |            | 0.384848485 |             |           | 0.4186047 |
| ENSG00000198796 |            | 0.43636364 |            | 0.436363636 | 0.380952381 | 0.2294118 | 0.3139535 |
| ENSG00000117625 |            | 0.16969697 |            | 0.16969697  |             |           | 0.0813953 |
| ENSG00000117153 |            | 0.4054878  |            | 0.405487805 |             |           | 0.3139535 |
| ENSG00000178363 |            | 0.32424242 |            | 0.324242424 |             |           | 0.0588235 |
| ENSG00000109854 |            |            |            |             |             |           | 0.4431818 |
| ENSG00000131969 |            | 0.16969697 |            | 0.16969697  |             |           | 0.5       |
| ENSG00000081791 |            | 0.10674157 |            | 0.106741573 |             |           |           |
| ENSG00000077157 | 0.39444444 | 0.38181818 | 0.39444444 | 0.381818182 | 0.301204819 | 0.2616279 | 0.3023256 |
| ENSG00000142459 |            | 0.11585366 |            | 0.115853659 |             |           | 0.1162791 |
| ENSG00000137055 |            | 0.08787879 |            | 0.087878788 |             |           |           |
| ENSG00000181718 |            | 0.115625   |            | 0.115625    |             |           |           |
| ENSG00000211786 | 0.10625    |            | 0.10625    |             | 0.11111111  | 0.1282051 |           |
| ENSG00000138756 |            |            |            |             |             |           | 0.2882353 |
| ENSG00000155506 | 0.23053892 | 0.32777778 | 0.23053892 | 0.32777778  | 0.107142857 | 0.1046512 | 0.0909091 |
| ENSG00000090612 |            | 0.33939394 |            | 0.339393939 | 0.083333333 | 0.0872093 | 0.0892857 |
| ENSG00000107295 |            | 0.42424242 |            | 0.424242424 |             |           | 0.2352941 |
| ENSG00000173068 |            | 0.43333333 |            | 0.433333333 |             |           | 0.2840909 |
| ENSG00000165795 | 0.28742515 | 0.33229814 | 0.28742515 | 0.332298137 | 0.375       | 0.4302326 | 0.3529412 |
| ENSG00000134490 |            | 0.47575758 |            | 0.475757576 | 0.107142857 | 0.0755814 | 0.3662791 |
| ENSG00000102471 |            | 0.49411765 |            | 0.494117647 |             |           | 0.25      |
| ENSG00000215494 |            | 0.15853659 |            | 0.158536585 |             |           | 0.3430233 |
| ENSG00000138796 |            | 0.071875   |            | 0.071875    |             |           |           |
| ENSG00000111846 | 0.43113772 | 0.10606061 | 0.43113772 | 0.106060606 | 0.297619048 | 0.3604651 | 0.1453488 |
| ENSG00000100439 |            | 0.28395062 |            | 0.283950617 |             |           | 0.2       |
| ENSG00000169228 |            | 0.17272727 |            | 0.172727273 |             |           | 0.4593023 |
| ENSG00000036530 | 0.49700599 | 0.11764706 | 0.49700599 | 0.117647059 | 0.321428571 | 0.244186  |           |
| ENSG00000101639 | 0.45402299 | 0.47575758 | 0.45402299 | 0.475757576 | 0.443181818 | 0.4659091 | 0.4186047 |
| ENSG00000075073 | 0.37125749 |            | 0.37125749 |             |             |           |           |
| ENSG00000102753 |            | 0.30909091 |            | 0.309090909 |             |           | 0.4268293 |
| ENSG00000087448 |            | 0.45138889 |            | 0.451388889 |             |           | 0.3068182 |
| ENSG00000166897 | 0.35628743 | 0.36728395 | 0.35628743 | 0.367283951 | 0.30952381  | 0.3139535 | 0.313253  |
| ENSG00000067606 | 0.41566265 |            | 0.41566265 |             | 0.357142857 | 0.2267442 |           |
| ENSG00000119705 |            | 0.42901235 |            | 0.429012346 |             |           | 0.3614458 |
| ENSG00000106246 |            | 0.09090909 |            | 0.090909091 |             |           |           |
| ENSG00000125787 |            |            |            |             | 0.363095238 | 0.1860465 |           |
| ENSG00000151882 |            | 0.42222222 |            | 0.422222222 |             |           | 0.2333333 |
| ENSG00000170633 |            | 0.08484848 |            | 0.084848485 | 0.386904762 | 0.4244186 | 0.1104651 |
| ENSG00000083857 | 0.2754491  | 0.49090909 | 0.2754491  | 0.490909091 | 0.380952381 | 0.3313953 | 0.494186  |
| ENSG00000182533 |            | 0.44252874 |            | 0.442528736 |             |           | 0.2325581 |
| ENSG00000144057 |            | 0.44242424 |            | 0.442424242 |             |           | 0.1511628 |
| ENSG00000119865 |            | 0.07575758 |            | 0.075757576 |             |           |           |
| ENSG00000157379 |            | 0.4494382  |            | 0.449438202 | 0.088888889 | 0.1333333 | 0.3604651 |
| ENSG00000079459 | 0.32634731 | 0.34545455 | 0.32634731 | 0.345454545 | 0.43902439  | 0.4411765 | 0.4583333 |
| ENSG00000163421 |            | 0.07055215 |            | 0.070552147 |             |           |           |
| ENSG00000068781 |            | 0.23939394 |            | 0.239393939 |             |           | 0.3823529 |
| ENSG00000165084 | 0.44610778 | 0.48181818 | 0.44610778 | 0.481818182 | 0.476190476 | 0.4651163 | 0.4534884 |
| ENSG00000119408 |            | 0.4030303  |            | 0.403030303 |             |           | 0.4058824 |
| ENSG00000129596 | 0.43712575 |            | 0.43712575 |             |             |           |           |

|                 |            |            |            |             |             |           |           |
|-----------------|------------|------------|------------|-------------|-------------|-----------|-----------|
| ENSG00000149043 |            | 0.11818182 |            | 0.118181818 |             |           | 0.3953488 |
| ENSG00000129451 | 0.27409639 | 0.42378049 | 0.27409639 | 0.423780488 | 0.325301205 | 0.3662791 | 0.4318182 |
| ENSG00000043143 | 0.26666667 | 0.09090909 | 0.26666667 | 0.090909091 | 0.111111111 |           | 0.2764706 |
| ENSG00000196932 | 0.30120482 | 0.33024691 | 0.30120482 | 0.330246914 | 0.097222222 |           | 0.4518072 |
| ENSG00000165775 |            | 0.3404908  |            | 0.340490798 |             |           | 0.2209302 |
| ENSG00000146151 |            | 0.39263804 |            | 0.392638037 |             |           | 0.4825581 |
| ENSG00000255366 |            | 0.38888889 |            | 0.388888889 |             |           | 0.3604651 |
| ENSG00000251209 | 0.06818182 | 0.38343558 | 0.06818182 | 0.383435583 | 0.125       | 0.1802326 | 0.1470588 |
| ENSG00000092295 | 0.23888889 | 0.18787879 | 0.23888889 | 0.187878788 | 0.466666667 | 0.5       | 0.4705882 |
| ENSG00000148688 |            | 0.33333333 |            | 0.333333333 |             |           | 0.4767442 |
| ENSG00000109929 |            | 0.32621951 |            | 0.326219512 |             |           | 0.3255814 |
| ENSG00000122958 | 0.28787879 | 0.36184211 | 0.28787879 | 0.361842105 |             |           | 0.122093  |
| ENSG00000255552 |            |            |            |             |             |           | 0.0930233 |
| ENSG00000186567 | 0.27222222 | 0.26136364 | 0.27222222 | 0.261363636 |             | 0.0581395 | 0.4294118 |
| ENSG00000204946 |            | 0.46625767 |            | 0.466257669 |             |           | 0.4883721 |
| ENSG00000179869 |            | 0.43939394 |            | 0.439393939 |             |           | 0.4883721 |
| ENSG00000185271 | 0.0508982  |            | 0.0508982  |             | 0.160714286 | 0.2267442 |           |
| ENSG00000124813 |            | 0.1969697  |            | 0.196969697 |             |           |           |
| ENSG00000198246 |            | 0.08181818 |            | 0.081818182 |             |           | 0.0523256 |
| ENSG00000251503 |            | 0.42675159 |            | 0.426751592 |             |           | 0.4117647 |
| ENSG00000172403 |            | 0.43030303 |            | 0.43030303  |             |           | 0.4593023 |
| ENSG00000198074 | 0.36826347 |            | 0.36826347 |             | 0.168674699 | 0.1860465 |           |
| ENSG00000177352 |            | 0.15740741 |            | 0.157407407 |             |           | 0.0535714 |
| ENSG00000154124 |            | 0.1        |            | 0.1         |             |           | 0.25      |
| ENSG00000088543 |            | 0.15151515 |            | 0.151515152 |             |           | 0.0872093 |
| ENSG00000168078 |            | 0.39444444 |            | 0.394444444 |             |           | 0.3666667 |
| ENSG00000249481 | 0.24550898 | 0.24444444 | 0.24550898 | 0.244444444 | 0.36746988  | 0.2848837 | 0.1363636 |
| ENSG00000106648 | 0.36781609 | 0.11280488 | 0.36781609 | 0.112804878 | 0.380952381 | 0.375     | 0.2267442 |
| ENSG00000183340 |            | 0.42727273 |            | 0.427272727 |             |           | 0.2383721 |
| ENSG00000135537 | 0.32934132 |            | 0.32934132 |             | 0.142857143 | 0.1976744 |           |
| ENSG00000103723 |            | 0.37575758 |            | 0.375757576 |             |           | 0.4360465 |
| ENSG00000169248 | 0.29341317 | 0.5        | 0.29341317 | 0.5         | 0.053571429 | 0.0581395 | 0.3546512 |
| ENSG00000156219 |            | 0.25       |            | 0.25        |             |           | 0.4883721 |
| ENSG00000166823 |            | 0.38181818 |            | 0.381818182 |             |           | 0.2383721 |
| ENSG00000162654 |            | 0.44242424 |            | 0.442424242 |             |           | 0.3430233 |
| ENSG00000221955 |            | 0.43636364 |            | 0.436363636 |             |           | 0.4302326 |
| ENSG00000137337 | 0.45808383 | 0.13030303 | 0.45808383 | 0.13030303  | 0.166666667 | 0.2616279 | 0.1136364 |
| ENSG00000049239 |            | 0.37658228 |            | 0.376582278 |             |           | 0.2965116 |
| ENSG00000182544 | 0.16666667 |            | 0.16666667 |             | 0.130952381 | 0.3       |           |
| ENSG00000144837 | 0.4760479  | 0.21818182 | 0.4760479  | 0.218181818 | 0.5         | 0.4825581 | 0.3488372 |
| ENSG00000021826 |            | 0.42727273 |            | 0.427272727 |             |           | 0.1470588 |
| ENSG00000150787 |            | 0.28527607 |            | 0.285276074 |             |           | 0.2625    |
| ENSG00000181523 |            | 0.36060606 |            | 0.360606061 |             |           | 0.3255814 |
| ENSG00000132694 | 0.41317365 | 0.20426829 | 0.41317365 | 0.204268293 | 0.477777778 | 0.2386364 | 0.4772727 |
| ENSG00000174891 | 0.4491018  |            | 0.4491018  |             | 0.452380952 | 0.4593023 |           |
| ENSG00000182173 | 0.49444444 | 0.31460674 | 0.49444444 | 0.314606742 |             |           | 0.4772727 |
| ENSG00000100038 | 0.11077844 | 0.14285714 | 0.11077844 | 0.142857143 | 0.5         | 0.4069767 | 0.0769231 |
| ENSG00000167851 |            | 0.32758621 |            | 0.327586207 |             |           | 0.4090909 |
| ENSG00000224186 |            | 0.1969697  |            | 0.196969697 |             |           | 0.1802326 |
| ENSG00000187173 |            | 0.06111111 |            | 0.061111111 |             |           | 0.2386364 |
| ENSG00000111877 | 0.4251497  | 0.23888889 | 0.4251497  | 0.238888889 | 0.327380952 | 0.3117647 | 0.244186  |
| ENSG00000129235 | 0.26047904 | 0.29775281 | 0.26047904 | 0.297752809 | 0.345238095 | 0.3895349 | 0.4090909 |
| ENSG00000181744 | 0.2        | 0.36196319 | 0.2        | 0.36196319  | 0.233333333 | 0.3636364 | 0.3795181 |
| ENSG00000008294 |            | 0.09756098 |            | 0.097560976 |             |           |           |

|                 |            |            |            |             |             |           |           |
|-----------------|------------|------------|------------|-------------|-------------|-----------|-----------|
| ENSG00000106299 |            | 0.11818182 |            | 0.118181818 |             |           | 0.0705882 |
| ENSG00000198625 |            | 0.48876404 |            | 0.488764045 |             |           | 0.2906977 |
| ENSG00000149582 |            | 0.29090909 |            | 0.290909091 |             |           | 0.4534884 |
| ENSG00000197885 | 0.38068182 | 0.17878788 | 0.38068182 | 0.178787879 | 0.410714286 | 0.4767442 | 0.0755814 |
| ENSG00000120278 |            | 0.25842697 |            | 0.258426966 | 0.18452381  | 0.1860465 | 0.2034884 |
| ENSG00000249016 | 0.2752809  |            | 0.2752809  |             |             |           |           |
| ENSG00000148399 |            | 0.17575758 |            | 0.175757576 |             |           | 0.0988372 |
| ENSG00000130427 |            | 0.11515152 |            | 0.115151515 |             |           |           |
| ENSG00000162775 | 0.22727273 |            | 0.22727273 |             | 0.188888889 | 0.1931818 |           |
| ENSG00000109111 | 0.31736527 |            | 0.31736527 |             | 0.196428571 | 0.1395349 |           |
| ENSG00000133706 |            | 0.30487805 |            | 0.304878049 |             |           | 0.2411765 |
| ENSG00000127928 |            | 0.3404908  |            | 0.340490798 |             |           | 0.2882353 |
| ENSG00000257040 | 0.29640719 | 0.43333333 | 0.29640719 | 0.433333333 | 0.196428571 | 0.2444444 | 0.4886364 |
| ENSG00000114738 | 0.16467066 | 0.18390805 | 0.16467066 | 0.183908046 | 0.4         | 0.3571429 | 0.375     |
| ENSG00000176076 |            | 0.36280488 |            | 0.362804878 |             |           | 0.0872093 |
| ENSG00000170348 |            | 0.49085366 |            | 0.490853659 |             |           | 0.2168675 |
| ENSG00000105193 |            | 0.15       |            | 0.15        |             |           | 0.0909091 |
| ENSG00000226397 |            | 0.07317073 |            | 0.073170732 |             |           | 0.4127907 |
| ENSG00000185294 |            | 0.20909091 |            | 0.209090909 |             |           |           |
| ENSG00000115594 | 0.07865169 | 0.37575758 | 0.07865169 | 0.375757576 | 0.144444444 | 0.1395349 | 0.4337349 |
| ENSG00000013288 |            | 0.12643678 |            | 0.126436782 |             |           | 0.195122  |
| ENSG00000212719 |            | 0.47575758 |            | 0.475757576 |             |           | 0.172619  |
| ENSG00000185339 |            | 0.49444444 |            | 0.494444444 | 0.113095238 | 0.1395349 | 0.4659091 |
| ENSG00000123473 |            | 0.46666667 |            | 0.466666667 |             |           | 0.4235294 |
| ENSG00000122566 |            |            |            |             |             |           | 0.3255814 |
| ENSG00000123131 | 0.34444444 |            | 0.34444444 |             | 0.411111111 | 0.375     |           |
| ENSG00000162434 |            | 0.07272727 |            | 0.072727273 |             |           |           |
| ENSG00000162627 |            | 0.27575758 |            | 0.275757576 |             |           | 0.3430233 |
| ENSG00000180483 |            | 0.47575758 |            | 0.475757576 |             |           | 0.2529412 |
| ENSG00000111300 |            | 0.11656442 |            | 0.116564417 |             |           | 0.4111111 |
| ENSG00000091436 |            | 0.47575758 |            | 0.475757576 |             |           | 0.3068182 |
| ENSG00000166927 |            | 0.3        |            | 0.3         |             |           | 0.2666667 |
| ENSG00000173088 |            | 0.42682927 |            | 0.426829268 |             |           | 0.4709302 |
| ENSG00000143355 | 0.1497006  | 0.42073171 | 0.1497006  | 0.420731707 | 0.452380952 | 0.4011628 | 0.3953488 |
| ENSG00000086232 |            | 0.4030303  |            | 0.403030303 |             |           | 0.4360465 |
| ENSG00000140678 |            | 0.45121951 |            | 0.451219512 |             |           | 0.3953488 |
| ENSG00000125810 |            | 0.44848485 |            | 0.448484848 |             |           | 0.2732558 |
| ENSG00000173120 |            | 0.08181818 |            | 0.081818182 |             |           |           |
| ENSG00000129514 |            | 0.36969697 |            | 0.36969697  |             |           | 0.1337209 |
| ENSG00000166432 |            | 0.1375     |            | 0.1375      |             |           |           |
| ENSG00000110090 |            | 0.4068323  |            | 0.406832298 |             |           | 0.2325581 |
| ENSG00000196417 | 0.44444444 | 0.28888889 | 0.44444444 | 0.288888889 | 0.255813953 | 0.1818182 | 0.4529412 |
| ENSG00000224586 |            | 0.31212121 |            | 0.312121212 |             |           | 0.4705882 |
| ENSG00000006530 | 0.30681818 |            | 0.30681818 |             | 0.055555556 | 0.0568182 |           |
| ENSG00000163702 |            | 0.46540881 |            | 0.465408805 |             |           |           |
| ENSG00000182054 |            |            |            |             |             |           | 0.2093023 |
| ENSG00000186081 |            | 0.08841463 |            | 0.088414634 | 0.322222222 | 0.2777778 |           |
| ENSG00000139445 |            | 0.49393939 |            | 0.493939394 |             |           | 0.377907  |
| ENSG00000120498 | 0.06470588 |            | 0.06470588 |             |             |           |           |
| ENSG00000172731 |            | 0.36363636 |            | 0.363636364 |             |           | 0.4244186 |
| ENSG00000133863 |            | 0.16060606 |            | 0.160606061 |             |           |           |
| ENSG00000013375 | 0.48314607 | 0.25151515 | 0.48314607 | 0.251515152 | 0.284090909 | 0.3488372 | 0.2409639 |
| ENSG00000254936 | 0.0748503  | 0.48170732 | 0.0748503  | 0.481707317 | 0.053571429 | 0.0529412 |           |
| ENSG00000125520 |            | 0.22424242 |            | 0.224242424 |             |           | 0.4244186 |

|                 |            |            |            |             |             |           |           |
|-----------------|------------|------------|------------|-------------|-------------|-----------|-----------|
| ENSG00000122884 |            | 0.06363636 |            | 0.063636364 |             |           | 0.3863636 |
| ENSG00000176749 |            | 0.44848485 |            | 0.448484848 |             |           |           |
| ENSG00000056487 |            | 0.4        |            | 0.4         |             |           | 0.4011628 |
| ENSG00000009830 | 0.16981132 | 0.47878788 | 0.16981132 | 0.478787879 | 0.475903614 | 0.4941176 | 0.5       |
| ENSG00000017621 |            | 0.09393939 |            | 0.093939394 |             |           |           |
| ENSG00000248144 |            | 0.11515152 |            | 0.115151515 |             |           | 0.0523256 |
| ENSG00000174371 | 0.46706587 | 0.4030303  | 0.46706587 | 0.403030303 | 0.295180723 | 0.3823529 | 0.4186047 |
| ENSG00000100626 |            | 0.46969697 |            | 0.46969697  |             |           | 0.375     |
| ENSG00000157168 |            | 0.16060606 |            | 0.160606061 |             |           |           |
| ENSG00000109445 |            | 0.271875   |            | 0.271875    |             |           | 0.3529412 |
| ENSG00000243207 |            | 0.10248447 |            | 0.102484472 |             |           | 0.2650602 |
| ENSG00000153107 | 0.2439759  | 0.33536585 | 0.2439759  | 0.335365854 | 0.487951807 | 0.4883721 | 0.4418605 |
| ENSG00000176746 | 0.43113772 | 0.31666667 | 0.43113772 | 0.316666667 | 0.470238095 | 0.4476744 | 0.4886364 |
| ENSG00000132541 |            | 0.26666667 |            | 0.266666667 |             |           | 0.0523256 |
| ENSG00000223802 |            | 0.08333333 |            | 0.083333333 |             |           | 0.2386364 |
| ENSG00000118965 |            | 0.39090909 |            | 0.390909091 |             |           | 0.3139535 |
| ENSG00000042429 | 0.05389222 | 0.13030303 | 0.05389222 | 0.13030303  |             |           | 0.2034884 |
| ENSG00000212768 | 0.46666667 |            | 0.46666667 |             |             |           |           |
| ENSG00000177082 |            | 0.24242424 |            | 0.242424242 |             |           | 0.372093  |
| ENSG00000134201 |            | 0.43888889 |            | 0.438888889 | 0.3         | 0.3444444 | 0.3295455 |
| ENSG00000137574 | 0.21515152 | 0.12121212 | 0.21515152 | 0.121212121 |             |           |           |
| ENSG00000099840 |            | 0.32183908 |            | 0.32183908  |             |           | 0.2159091 |
| ENSG00000171227 |            | 0.15555556 |            | 0.155555556 |             |           | 0.0888889 |
| ENSG00000117748 |            | 0.38414634 |            | 0.384146341 |             |           | 0.4058824 |
| ENSG00000054116 | 0.07954545 |            | 0.07954545 |             |             |           |           |
| ENSG00000198876 |            | 0.33030303 |            | 0.33030303  |             |           | 0.2034884 |
| ENSG00000119778 |            | 0.43030303 |            | 0.43030303  |             |           | 0.1777778 |
| ENSG00000109099 |            | 0.45454545 |            | 0.454545455 |             |           | 0.3488372 |
| ENSG00000008838 |            | 0.40804598 |            | 0.408045977 |             |           | 0.4431818 |
| ENSG00000140992 |            | 0.05757576 |            | 0.057575758 |             |           |           |
| ENSG00000149294 | 0.07784431 | 0.38484848 | 0.07784431 | 0.384848485 | 0.31547619  | 0.2790698 | 0.0930233 |
| ENSG00000172888 |            | 0.36060606 |            | 0.360606061 |             |           | 0.2674419 |
| ENSG00000175376 | 0.12874251 | 0.1969697  | 0.12874251 | 0.196969697 | 0.178571429 | 0.0872093 | 0.1860465 |
| ENSG00000163933 |            | 0.41212121 |            | 0.412121212 |             |           | 0.1802326 |
| ENSG00000140521 |            | 0.07878788 |            | 0.078787879 |             |           |           |
| ENSG00000204592 |            | 0.31111111 |            | 0.311111111 |             |           | 0.3181818 |
| ENSG00000081320 |            | 0.33146067 |            | 0.331460674 |             |           | 0.1842105 |
| ENSG00000072786 |            | 0.18787879 |            | 0.187878788 |             |           |           |
| ENSG00000006116 | 0.09281437 | 0.23636364 | 0.09281437 | 0.236363636 | 0.18452381  | 0.1337209 | 0.4244186 |
| ENSG00000198719 | 0.06287425 | 0.39393939 | 0.06287425 | 0.393939394 | 0.386904762 | 0.4534884 | 0.2906977 |
| ENSG00000006042 |            | 0.33536585 |            | 0.335365854 |             |           | 0.2906977 |
| ENSG00000186300 |            | 0.40490798 |            | 0.404907975 |             |           | 0.3139535 |
| ENSG00000244734 |            |            |            |             | 0.351190476 | 0.4534884 |           |
| ENSG00000243667 | 0.07784431 |            | 0.07784431 |             |             |           |           |
| ENSG00000079739 | 0.2005988  | 0.14545455 | 0.2005988  | 0.145454545 |             |           | 0.1511628 |
| ENSG00000136273 | 0.25568182 | 0.46111111 | 0.25568182 | 0.461111111 | 0.422222222 | 0.5       | 0.5       |
| ENSG00000196323 |            | 0.42121212 |            | 0.421212121 |             |           | 0.4186047 |
| ENSG00000110104 |            | 0.36904762 |            | 0.369047619 |             |           | 0.3488372 |
| ENSG00000135976 |            | 0.09937888 |            | 0.099378882 |             |           | 0.0823529 |
| ENSG00000198833 |            | 0.15151515 |            | 0.151515152 |             |           | 0.3529412 |
| ENSG00000134339 |            | 0.49444444 |            | 0.494444444 |             |           | 0.1162791 |
| ENSG00000168959 |            | 0.49090909 |            | 0.490909091 |             |           | 0.4294118 |
| ENSG00000159625 |            |            |            |             |             | 0.0697674 |           |
| ENSG00000185033 | 0.49700599 | 0.46363636 | 0.49700599 | 0.463636364 | 0.333333333 | 0.3255814 | 0.4302326 |

|                 |            |            |            |             |             |           |           |
|-----------------|------------|------------|------------|-------------|-------------|-----------|-----------|
| ENSG00000146530 | 0.47126437 | 0.44968553 | 0.47126437 | 0.449685535 | 0.445783133 | 0.3555556 | 0.4235294 |
| ENSG00000184454 |            | 0.36206897 |            | 0.362068966 |             |           | 0.494186  |
| ENSG00000107937 |            | 0.20909091 |            | 0.209090909 |             |           | 0.2777778 |
| ENSG00000234949 |            | 0.22560976 |            | 0.225609756 |             |           | 0.4593023 |
| ENSG00000183955 |            | 0.08333333 |            | 0.083333333 |             |           |           |
| ENSG00000008018 | 0.12874251 |            | 0.12874251 |             |             |           |           |
| ENSG00000134627 | 0.17664671 | 0.44785276 | 0.17664671 | 0.447852761 |             | 0.1       | 0.4761905 |
| ENSG00000183431 | 0.3502994  | 0.478125   | 0.3502994  | 0.478125    | 0.339285714 | 0.4360465 | 0.4302326 |
| ENSG00000213347 |            | 0.36363636 |            | 0.363636364 |             |           | 0.4476744 |
| ENSG00000150991 | 0.41616766 |            | 0.41616766 |             | 0.369047619 | 0.4476744 |           |
| ENSG00000145335 | 0.19318182 | 0.46363636 | 0.19318182 | 0.463636364 | 0.122222222 | 0.0568182 | 0.4186047 |
| ENSG00000235194 |            | 0.28484848 |            | 0.284848485 |             |           | 0.4593023 |
| ENSG00000130402 |            | 0.24719101 |            | 0.247191011 |             |           | 0.2383721 |
| ENSG00000182108 |            | 0.42424242 |            | 0.424242424 |             |           | 0.4294118 |
| ENSG00000111540 | 0.06969697 | 0.0969697  | 0.06969697 | 0.096969697 | 0.288888889 | 0.2613636 |           |
| ENSG00000125821 |            | 0.20909091 |            | 0.209090909 |             |           |           |
| ENSG00000172915 | 0.27743902 | 0.42424242 | 0.27743902 | 0.424242424 | 0.369047619 | 0.2616279 | 0.25      |
| ENSG00000198542 |            |            |            |             |             |           | 0.3023256 |
| ENSG00000109182 | 0.17065868 | 0.28963415 | 0.17065868 | 0.289634146 | 0.279761905 | 0.2848837 | 0.3430233 |
| ENSG00000169116 |            | 0.31212121 |            | 0.312121212 |             |           | 0.3139535 |
| ENSG00000196943 |            | 0.19090909 |            | 0.190909091 |             |           | 0.2272727 |
| ENSG00000169994 | 0.29341317 | 0.23333333 | 0.29341317 | 0.233333333 | 0.154761905 | 0.0705882 | 0.1453488 |
| ENSG00000157978 |            | 0.48484848 |            | 0.484848485 |             |           | 0.4127907 |
| ENSG00000147133 | 0.28742515 |            | 0.28742515 |             |             |           |           |
| ENSG00000174483 |            | 0.41463415 |            | 0.414634146 |             |           | 0.4823529 |
| ENSG00000134463 | 0.4126506  |            | 0.4126506  |             |             |           |           |
| ENSG00000139192 | 0.1257485  |            | 0.1257485  |             |             |           |           |
| ENSG00000214753 |            |            |            |             |             |           | 0.1744186 |
| ENSG00000158555 | 0.34036145 | 0.38484848 | 0.34036145 | 0.384848485 | 0.148809524 | 0.25      | 0.375     |
| ENSG00000196376 |            | 0.14848485 |            | 0.148484848 |             |           |           |
| ENSG00000196565 | 0.08888889 |            | 0.08888889 |             | 0.077777778 | 0.1477273 |           |
| ENSG00000124380 |            | 0.45       |            | 0.45        |             |           | 0.4318182 |
| ENSG00000114030 |            | 0.16363636 |            | 0.163636364 |             |           | 0.3430233 |
| ENSG00000176853 | 0.07471264 | 0.13372093 | 0.07471264 | 0.13372093  | 0.455555556 | 0.3295455 | 0.2906977 |
| ENSG00000167646 |            | 0.13939394 |            | 0.139393939 |             |           | 0.2647059 |
| ENSG00000134028 | 0.18333333 | 0.43333333 | 0.18333333 | 0.433333333 | 0.466666667 | 0.4545455 | 0.2411765 |
| ENSG00000182810 |            |            |            |             |             |           | 0.3139535 |
| ENSG00000139610 |            | 0.33030303 |            | 0.33030303  |             |           | 0.3035714 |
| ENSG00000033050 |            | 0.41954023 |            | 0.41954023  |             |           | 0.4285714 |
| ENSG00000087903 |            | 0.05063291 |            | 0.050632911 |             |           |           |
| ENSG00000168070 | 0.33832335 | 0.32424242 | 0.33832335 | 0.324242424 | 0.172619048 | 0.1511628 | 0.1511628 |
| ENSG00000171540 | 0.28313253 |            | 0.28313253 |             | 0.339285714 | 0.3352941 |           |
| ENSG00000119723 | 0.08988764 | 0.44545455 | 0.08988764 | 0.445454545 | 0.205128205 | 0.25      | 0.3522727 |
| ENSG00000168438 |            | 0.06666667 |            | 0.066666667 | 0.125       | 0.1058824 | 0.122093  |
| ENSG00000124783 |            | 0.36969697 |            | 0.36969697  |             |           | 0.4127907 |
| ENSG00000111275 |            |            |            |             |             |           | 0.2383721 |
| ENSG00000114850 |            | 0.28658537 |            | 0.286585366 |             |           | 0.2325581 |
| ENSG00000183751 | 0.11676647 |            | 0.11676647 |             |             |           |           |
| ENSG00000164270 |            | 0.40909091 |            | 0.409090909 |             |           | 0.2383721 |
| ENSG00000140006 | 0.42215569 |            | 0.42215569 |             |             |           |           |
| ENSG00000151923 | 0.33229814 | 0.05151515 | 0.33229814 | 0.051515152 | 0.422619048 | 0.3614458 |           |
| ENSG00000163956 |            | 0.49425287 |            | 0.494252874 |             |           | 0.4186047 |
| ENSG00000142528 | 0.24550898 |            | 0.24550898 |             |             |           |           |
| ENSG00000101321 |            | 0.29090909 |            | 0.290909091 |             |           | 0.1162791 |



|                 |            |            |            |             |             |           |           |
|-----------------|------------|------------|------------|-------------|-------------|-----------|-----------|
| ENSG00000165409 | 0.22891566 | 0.43636364 | 0.22891566 | 0.436363636 | 0.3         | 0.3109756 | 0.4593023 |
| ENSG00000153789 |            |            |            |             |             |           | 0.0581395 |
| ENSG00000184040 |            | 0.31212121 |            | 0.312121212 |             |           | 0.4647059 |
| ENSG00000123453 | 0.25287356 | 0.35365854 | 0.25287356 | 0.353658537 | 0.333333333 | 0.3255814 | 0.375     |
| ENSG00000061656 | 0.32934132 |            | 0.32934132 |             | 0.090361446 | 0.0988372 |           |
| ENSG00000205177 |            | 0.36363636 |            | 0.363636364 |             |           | 0.4647059 |
| ENSG00000156136 |            | 0.07012195 |            | 0.070121951 |             |           |           |
| ENSG00000081386 | 0.46706587 |            | 0.46706587 |             | 0.345238095 | 0.3882353 |           |
| ENSG00000163600 |            | 0.25454545 |            | 0.254545455 |             |           | 0.1976744 |
| ENSG00000198585 | 0.48333333 | 0.05454545 | 0.48333333 | 0.054545455 |             |           | 0.3181818 |
| ENSG00000162174 | 0.33532934 | 0.39090909 | 0.33532934 | 0.390909091 | 0.243902439 | 0.2647059 | 0.2790698 |
| ENSG00000089048 | 0.29341317 | 0.1        | 0.29341317 | 0.1         | 0.410714286 | 0.3546512 |           |
| ENSG00000187905 |            | 0.41954023 |            | 0.41954023  |             |           | 0.2267442 |
| ENSG00000109381 |            |            |            |             | 0.166666667 | 0.2613636 |           |
| ENSG00000140995 |            | 0.15555556 |            | 0.15555556  |             |           |           |
| ENSG00000123836 | 0.16766467 | 0.44545455 | 0.16766467 | 0.445454545 | 0.154761905 | 0.0764706 | 0.2048193 |
| ENSG00000112062 |            | 0.47191011 |            | 0.471910112 |             |           | 0.4764706 |
| ENSG00000167515 |            | 0.34242424 |            | 0.342424242 |             |           | 0.4360465 |
| ENSG00000183734 | 0.29341317 |            | 0.29341317 |             | 0.488095238 | 0.4534884 |           |
| ENSG00000185860 |            | 0.3969697  |            | 0.396969697 |             |           | 0.4883721 |
| ENSG00000002726 | 0.38855422 | 0.17575758 | 0.38855422 | 0.175757576 | 0.476190476 | 0.4651163 | 0.4651163 |
| ENSG00000111186 | 0.16566265 | 0.26363636 | 0.16566265 | 0.263636364 | 0.19047619  | 0.3255814 | 0.2674419 |
| ENSG00000196072 | 0.18333333 |            | 0.18333333 |             |             |           | 0.0988372 |
| ENSG00000113240 |            | 0.49390244 |            | 0.493902439 |             |           | 0.3197674 |
| ENSG00000134278 | 0.30113636 | 0.2969697  | 0.30113636 | 0.296969697 | 0.366666667 | 0.3863636 | 0.1744186 |
| ENSG00000123374 |            | 0.07471264 |            | 0.074712644 |             |           | 0.122093  |
| ENSG00000174827 |            |            |            |             | 0.148809524 | 0.2267442 |           |
| ENSG00000126091 |            | 0.31515152 |            | 0.315151515 |             |           | 0.4360465 |
| ENSG00000177752 |            | 0.4030303  |            | 0.403030303 |             |           | 0.4767442 |
| ENSG00000094796 |            | 0.2012987  |            | 0.201298701 |             |           | 0.1       |
| ENSG00000119535 | 0.12048193 |            | 0.12048193 |             | 0.071428571 | 0.0988372 |           |
| ENSG00000105929 |            | 0.18787879 |            | 0.187878788 |             |           |           |
| ENSG00000037897 | 0.10493827 | 0.32926829 | 0.10493827 | 0.329268293 | 0.380952381 | 0.375     | 0.2267442 |
| ENSG00000188321 |            | 0.43939394 |            | 0.439393939 |             |           | 0.4244186 |
| ENSG00000185742 |            | 0.37195122 |            | 0.37195122  |             |           | 0.3662791 |
| ENSG00000138744 |            | 0.41954023 |            | 0.41954023  |             |           | 0.0681818 |
| ENSG00000149654 | 0.19318182 |            | 0.19318182 |             | 0.177777778 | 0.1931818 |           |
| ENSG00000181577 |            |            |            |             |             |           | 0.2294118 |
| ENSG00000119682 | 0.38333333 | 0.4        | 0.38333333 | 0.4         | 0.288888889 | 0.2954545 | 0.4244186 |
| ENSG00000182667 |            | 0.35582822 |            | 0.355828221 |             |           | 0.1802326 |
| ENSG00000173681 |            | 0.14848485 |            | 0.148484848 |             |           | 0.0523256 |
| ENSG00000157500 | 0.32424242 | 0.39570552 | 0.32424242 | 0.395705521 |             |           | 0.1190476 |
| ENSG00000164749 |            | 0.47619048 |            | 0.476190476 |             |           | 0.4268293 |
| ENSG00000141150 |            |            |            |             |             |           | 0.2383721 |
| ENSG00000131171 |            | 0.34444444 |            | 0.344444444 |             |           | 0.1363636 |
| ENSG00000143612 |            | 0.42727273 |            | 0.427272727 |             |           | 0.4476744 |
| ENSG00000173917 |            | 0.36363636 |            | 0.363636364 |             |           | 0.2848837 |
| ENSG00000229972 |            |            |            |             |             |           | 0.0764706 |
| ENSG00000090659 |            | 0.40909091 |            | 0.409090909 |             |           | 0.3444444 |
| ENSG00000111450 |            | 0.44444444 |            | 0.444444444 |             |           | 0.1931818 |
| ENSG00000123610 |            | 0.15853659 |            | 0.158536585 |             |           | 0.0705882 |
| ENSG00000213654 | 0.11377246 |            | 0.11377246 |             |             |           |           |
| ENSG00000117592 |            | 0.23333333 |            | 0.233333333 |             |           | 0.4127907 |
| ENSG00000042781 |            | 0.19444444 |            | 0.194444444 |             |           | 0.3255814 |

|                 |            |            |            |             |             |           |
|-----------------|------------|------------|------------|-------------|-------------|-----------|
| ENSG00000189227 |            | 0.20858896 |            | 0.208588957 |             | 0.494186  |
| ENSG00000065609 |            | 0.26060606 |            | 0.260606061 |             | 0.2848837 |
| ENSG00000152785 |            | 0.20552147 |            | 0.205521472 |             | 0.1891892 |
| ENSG00000154654 |            | 0.48333333 |            | 0.483333333 |             | 0.2555814 |
| ENSG00000149599 | 0.15568862 | 0.40555556 | 0.15568862 | 0.405555556 | 0.345238095 | 0.3430233 |
| ENSG00000122203 | 0.2        | 0.23030303 | 0.2        | 0.23030303  | 0.333333333 | 0.4888889 |
| ENSG00000182621 |            | 0.44117647 |            | 0.441176471 |             | 0.4244186 |
| ENSG00000132330 | 0.34730539 | 0.46511628 | 0.34730539 | 0.465116279 |             | 0.4470588 |
| ENSG00000166575 |            | 0.2        |            | 0.2         |             | 0.4011628 |
| ENSG00000146416 |            | 0.17878788 |            | 0.178787879 |             | 0.452381  |
| ENSG00000196636 | 0.2754491  | 0.46666667 | 0.2754491  | 0.466666667 | 0.452380952 | 0.4588235 |
| ENSG00000129221 |            | 0.26060606 |            | 0.260606061 |             | 0.2674419 |
| ENSG00000113916 |            | 0.36363636 |            | 0.363636364 | 0.144444444 | 0.3636364 |
| ENSG00000197497 |            | 0.43597561 |            | 0.43597561  |             | 0.3139535 |
| ENSG00000179253 | 0.38023952 | 0.33544304 | 0.38023952 | 0.335443038 | 0.404761905 | 0.5       |
| ENSG00000132623 |            | 0.16853933 |            | 0.168539326 |             | 0.2965116 |
| ENSG00000169118 |            |            |            |             |             | 0.0581395 |
| ENSG00000213380 |            | 0.38505747 |            | 0.385057471 |             | 0.0909091 |
| ENSG00000179066 | 0.40718563 |            | 0.40718563 |             | 0.452380952 | 0.4186047 |
| ENSG00000128652 | 0.49401198 | 0.35454545 | 0.49401198 | 0.354545455 | 0.071428571 | 0.1453488 |
| ENSG00000118094 |            | 0.29090909 |            | 0.290909091 |             | 0.494186  |
| ENSG00000135404 | 0.21111111 |            | 0.21111111 |             |             |           |
| ENSG00000198690 |            | 0.30606061 |            | 0.306060606 |             | 0.1823529 |
| ENSG00000188334 |            | 0.5        |            | 0.5         |             | 0.2555556 |
| ENSG00000141425 |            | 0.21111111 |            | 0.211111111 |             | 0.25      |
| ENSG00000142319 |            | 0.27575758 |            | 0.275757576 |             | 0.122093  |
| ENSG00000156599 | 0.23952096 | 0.44242424 | 0.23952096 | 0.442424242 |             | 0.1046512 |
| ENSG00000182551 | 0.4        | 0.19047619 | 0.4        | 0.19047619  | 0.311111111 | 0.2380952 |
| ENSG00000162992 | 0.18263473 |            | 0.18263473 |             | 0.095238095 | 0.0755814 |
| ENSG00000163565 | 0.25748503 |            | 0.25748503 |             | 0.345238095 | 0.3023256 |
| ENSG00000125166 |            | 0.37267081 |            | 0.372670807 |             | 0.3895349 |
| ENSG00000132326 | 0.08383234 | 0.17272727 | 0.08383234 | 0.172727273 | 0.05952381  | 0.0581395 |
| ENSG00000197976 |            | 0.43888889 |            | 0.438888889 |             | 0.3636364 |
| ENSG00000118971 | 0.48802395 | 0.35757576 | 0.48802395 | 0.357575758 | 0.271084337 | 0.3837209 |
| ENSG00000181035 |            | 0.14814815 |            | 0.148148148 |             | 0.3235294 |
| ENSG00000186889 |            | 0.16768293 |            | 0.167682927 |             | 0.0882353 |
| ENSG00000203326 | 0.41666667 | 0.32777778 | 0.41666667 | 0.327777778 | 0.433333333 | 0.4476744 |
| ENSG00000175115 | 0.1497006  | 0.23030303 | 0.1497006  | 0.23030303  | 0.272727273 | 0.3444444 |
| ENSG00000135686 |            | 0.3902439  |            | 0.390243902 |             | 0.4534884 |
| ENSG00000148690 |            | 0.11818182 |            | 0.118181818 |             | 0.2159091 |
| ENSG00000139914 | 0.26646707 |            | 0.26646707 |             | 0.363095238 | 0.2209302 |
| ENSG00000100116 |            | 0.28181818 |            | 0.281818182 |             | 0.4302326 |
| ENSG00000106823 |            | 0.43030303 |            | 0.43030303  |             | 0.3953488 |
| ENSG00000087152 |            | 0.33536585 |            | 0.335365854 |             | 0.2529412 |
| ENSG00000023516 |            | 0.35151515 |            | 0.351515152 |             | 0.2823529 |
| ENSG00000092841 |            | 0.13333333 |            | 0.133333333 |             | 0.3139535 |
| ENSG00000075785 |            |            |            |             |             | 0.25      |
| ENSG00000146360 |            | 0.41515152 |            | 0.415151515 |             | 0.0813953 |
| ENSG00000214711 | 0.27222222 | 0.46666667 | 0.27222222 | 0.466666667 | 0.5         | 0.2616279 |
| ENSG00000168301 | 0.43113772 |            | 0.43113772 |             | 0.273809524 | 0.3977273 |
| ENSG00000137802 |            | 0.38953488 |            | 0.389534884 |             | 0.255814  |
| ENSG00000144191 |            |            |            |             | 0.182926829 | 0.3197674 |
| ENSG00000162571 |            | 0.13939394 |            | 0.139393939 |             | 0.3139535 |
| ENSG00000216937 |            | 0.48181818 |            | 0.481818182 |             | 0.1969697 |
|                 |            |            |            |             |             | 0.3837209 |
|                 |            |            |            |             |             | 0.1686047 |

|                 |            |            |            |             |             |           |           |
|-----------------|------------|------------|------------|-------------|-------------|-----------|-----------|
| ENSG00000111203 |            | 0.1030303  |            | 0.103030303 |             |           | 0.2151163 |
| ENSG00000241978 | 0.34431138 | 0.49691358 | 0.34431138 | 0.49691358  | 0.375       | 0.4534884 | 0.4883721 |
| ENSG00000257093 |            | 0.45757576 |            | 0.457575758 |             |           | 0.4418605 |
| ENSG0000023892  | 0.2030303  | 0.07926829 | 0.2030303  | 0.079268293 |             |           |           |
| ENSG00000153233 | 0.21556886 |            | 0.21556886 |             | 0.060240964 | 0.0755814 |           |
| ENSG00000158163 |            | 0.05813953 |            | 0.058139535 |             |           | 0.4418605 |
| ENSG00000111110 |            | 0.22121212 |            | 0.221212121 |             |           | 0.3895349 |
| ENSG00000184307 |            | 0.4030303  |            | 0.403030303 |             |           | 0.4069767 |
| ENSG00000104047 |            | 0.26969697 |            | 0.26969697  |             |           | 0.4593023 |
| ENSG00000126391 |            | 0.20909091 |            | 0.209090909 |             |           | 0.0523256 |
| ENSG00000174886 | 0.38323353 |            | 0.38323353 |             | 0.25        | 0.2674419 |           |
| ENSG00000081087 |            | 0.27878788 |            | 0.278787879 |             |           | 0.4651163 |
| ENSG00000131379 | 0.20658683 |            | 0.20658683 |             | 0.244047619 | 0.3023256 |           |
| ENSG00000179639 |            | 0.15454545 |            | 0.154545455 |             |           |           |
| ENSG00000123612 | 0.26946108 |            | 0.26946108 |             | 0.303571429 | 0.2151163 |           |
| ENSG00000101363 |            | 0.38181818 |            | 0.381818182 |             |           | 0.2674419 |
| ENSG00000159882 | 0.45508982 | 0.17272727 | 0.45508982 | 0.172727273 | 0.488888889 | 0.4431818 | 0.2034884 |
| ENSG00000113595 | 0.37356322 | 0.36781609 | 0.37356322 | 0.367816092 | 0.453488372 | 0.3111111 | 0.3023256 |
| ENSG00000171766 | 0.4491018  | 0.38271605 | 0.4491018  | 0.382716049 | 0.177777778 | 0.1931818 | 0.1931818 |
| ENSG00000133104 | 0.20555556 | 0.26969697 | 0.20555556 | 0.26969697  | 0.166666667 | 0.2222222 | 0.4476744 |
| ENSG00000247746 |            |            |            |             |             |           | 0.2559524 |
| ENSG00000143126 |            | 0.29885057 |            | 0.298850575 |             |           | 0.0755814 |
| ENSG00000101350 |            | 0.36666667 |            | 0.366666667 |             |           | 0.3197674 |
| ENSG00000148516 | 0.22754491 | 0.05757576 | 0.22754491 | 0.057575758 |             |           | 0.1744186 |
| ENSG00000182698 | 0.05120482 |            | 0.05120482 |             | 0.18452381  | 0.1764706 |           |
| ENSG00000136918 |            | 0.46666667 |            | 0.466666667 |             |           | 0.372093  |
| ENSG00000053524 |            | 0.20679012 |            | 0.206790123 |             |           | 0.3823529 |
| ENSG00000089063 |            | 0.47272727 |            | 0.472727273 |             |           | 0.1369048 |
| ENSG00000162949 | 0.32035928 | 0.36196319 | 0.32035928 | 0.36196319  | 0.238095238 | 0.3023256 | 0.5       |
| ENSG00000145908 |            | 0.06707317 |            | 0.067073171 |             |           | 0.1764706 |
| ENSG00000110076 |            | 0.05590062 |            | 0.055900621 |             |           | 0.2848837 |
| ENSG00000107890 |            | 0.05757576 |            | 0.057575758 | 0.25        | 0.2790698 | 0.3470588 |
| ENSG00000141560 |            | 0.3        |            | 0.3         |             |           | 0.494186  |
| ENSG00000091972 | 0.0748503  | 0.06969697 | 0.0748503  | 0.06969697  | 0.119047619 | 0.1569767 | 0.1976744 |
| ENSG00000173431 | 0.38622754 |            | 0.38622754 |             | 0.410714286 | 0.3372093 |           |
| ENSG00000175166 | 0.36526946 | 0.49691358 | 0.36526946 | 0.49691358  | 0.404761905 | 0.4651163 | 0.2235294 |
| ENSG00000236637 |            | 0.16358025 |            | 0.163580247 |             |           | 0.5       |
| ENSG00000170382 | 0.37125749 | 0.46060606 | 0.37125749 | 0.460606061 | 0.142857143 | 0.122093  | 0.2674419 |
| ENSG00000182584 | 0.246875   |            | 0.246875   |             | 0.385542169 | 0.4036145 |           |
| ENSG00000145901 | 0.28443114 | 0.06363636 | 0.28443114 | 0.063636364 | 0.416666667 | 0.494186  | 0.122093  |
| ENSG00000116871 | 0.05555556 |            | 0.05555556 |             | 0.077777778 | 0.1477273 |           |
| ENSG00000119599 | 0.45454545 | 0.28484848 | 0.45454545 | 0.284848485 | 0.392857143 | 0.4825581 | 0.4883721 |
| ENSG00000149196 | 0.28143713 | 0.26969697 | 0.28143713 | 0.26969697  | 0.226190476 | 0.25      | 0.2790698 |
| ENSG00000143067 |            | 0.43333333 |            | 0.433333333 |             |           | 0.4583333 |
| ENSG00000106459 | 0.2005988  | 0.18484848 | 0.2005988  | 0.184848485 | 0.391566265 | 0.4244186 | 0.2325581 |
| ENSG00000170790 | 0.15568862 |            | 0.15568862 |             | 0.351190476 | 0.2906977 |           |
| ENSG00000170955 | 0.36904762 |            | 0.36904762 |             | 0.445945946 | 0.4358974 |           |
| ENSG00000134216 | 0.26404494 | 0.36890244 | 0.26404494 | 0.368902439 | 0.416666667 | 0.3604651 | 0.5       |
| ENSG00000237651 | 0.41477273 |            | 0.41477273 |             | 0.275       | 0.3372093 |           |
| ENSG00000187676 |            | 0.25882353 |            | 0.258823529 |             |           | 0.4090909 |
| ENSG00000167767 |            | 0.39393939 |            | 0.393939394 |             |           | 0.4534884 |
| ENSG00000256391 | 0.47878788 | 0.44545455 | 0.47878788 | 0.445454545 | 0.253012048 | 0.3430233 | 0.3430233 |
| ENSG00000165181 | 0.24431818 | 0.45454545 | 0.24431818 | 0.454545455 |             |           | 0.1845238 |
| ENSG00000111196 | 0.47222222 | 0.20786517 | 0.47222222 | 0.207865169 |             |           |           |

|                 |            |            |            |             |             |           |           |
|-----------------|------------|------------|------------|-------------|-------------|-----------|-----------|
| ENSG00000135046 | 0.26946108 |            | 0.26946108 |             | 0.166666667 |           | 0.1704545 |
| ENSG00000187123 |            | 0.22256098 |            | 0.222560976 |             |           | 0.127907  |
| ENSG00000183513 |            | 0.23030303 |            | 0.23030303  |             |           | 0.2674419 |
| ENSG00000168237 |            | 0.1097561  |            | 0.109756098 |             |           |           |
| ENSG00000100665 | 0.36666667 |            | 0.36666667 |             | 0.452380952 |           | 0.5       |
| ENSG00000142065 |            | 0.4030303  |            | 0.403030303 |             |           | 0.4186047 |
| ENSG00000206384 |            | 0.15151515 |            | 0.151515152 |             |           | 0.3546512 |
| ENSG00000129749 |            | 0.08522727 |            | 0.085227273 |             |           | 0.1104651 |
| ENSG00000152242 |            | 0.21515152 |            | 0.215151515 |             |           | 0.4883721 |
| ENSG00000171865 |            | 0.38343558 |            | 0.383435583 |             |           | 0.2674419 |
| ENSG00000217128 |            | 0.24545455 |            | 0.245454545 |             |           | 0.4698795 |
| ENSG00000124370 |            |            |            |             |             | 0.0833333 |           |
| ENSG00000113569 | 0.05555556 | 0.16666667 | 0.05555556 | 0.166666667 |             |           | 0.0755814 |
| ENSG00000141424 | 0.35628743 |            | 0.35628743 |             | 0.19047619  |           | 0.2209302 |
| ENSG00000074266 | 0.26136364 | 0.40606061 | 0.26136364 | 0.406060606 | 0.318181818 | 0.3081395 | 0.2674419 |
| ENSG00000139508 |            | 0.47239264 |            | 0.472392638 |             |           | 0.4069767 |
| ENSG00000155011 |            | 0.33636364 |            | 0.336363636 | 0.255952381 | 0.1162791 | 0.4186047 |
| ENSG00000135373 | 0.31437126 | 0.43604651 | 0.31437126 | 0.436046512 | 0.465909091 | 0.4883721 | 0.4709302 |
| ENSG00000164256 | 0.14444444 | 0.2030303  | 0.14444444 | 0.203030303 | 0.2         | 0.1363636 | 0.4302326 |
| ENSG00000115568 | 0.15454545 | 0.40243902 | 0.15454545 | 0.402439024 | 0.208333333 | 0.244186  | 0.244186  |
| ENSG00000158639 | 0.43333333 |            | 0.43333333 |             |             |           |           |
| ENSG00000120437 | 0.1257485  | 0.1969697  | 0.1257485  | 0.196969697 | 0.154761905 | 0.1802326 | 0.4476744 |
| ENSG00000167139 |            | 0.19090909 |            | 0.190909091 |             |           | 0.0523256 |
| ENSG00000135124 |            | 0.49090909 |            | 0.490909091 |             |           | 0.3255814 |
| ENSG00000130312 |            | 0.41515152 |            | 0.415151515 |             |           | 0.122093  |
| ENSG00000167895 | 0.11363636 | 0.5        | 0.11363636 | 0.5         | 0.477777778 | 0.4318182 | 0.4659091 |
| ENSG00000198723 | 0.2005988  |            | 0.2005988  |             | 0.136904762 |           | 0.3255814 |
| ENSG00000135679 |            | 0.4969697  |            | 0.496969697 |             |           | 0.2325581 |
| ENSG00000043355 |            | 0.21646341 |            | 0.216463415 |             |           | 0.2965116 |
| ENSG00000177108 | 0.08383234 | 0.23939394 | 0.08383234 | 0.239393939 | 0.238095238 | 0.2034884 | 0.3666667 |
| ENSG00000108588 |            | 0.36890244 |            | 0.368902439 |             |           | 0.3941176 |
| ENSG00000142961 | 0.49101796 | 0.45333333 | 0.49101796 | 0.453333333 | 0.273809524 | 0.3255814 | 0.1046512 |
| ENSG00000221926 | 0.290625   |            | 0.290625   |             | 0.494047619 |           | 0.4534884 |
| ENSG00000214941 |            | 0.48181818 |            | 0.481818182 |             |           | 0.2613636 |
| ENSG00000130204 |            | 0.29775281 |            | 0.297752809 |             |           | 0.1022727 |
| ENSG00000078269 | 0.24251497 | 0.45454545 | 0.24251497 | 0.454545455 | 0.428571429 | 0.4709302 | 0.4545455 |
| ENSG00000135917 | 0.19161677 | 0.46969697 | 0.19161677 | 0.46969697  | 0.196428571 | 0.1918605 |           |
| ENSG00000137193 |            | 0.31818182 |            | 0.318181818 |             |           | 0.0697674 |
| ENSG00000056277 |            | 0.39393939 |            | 0.393939394 |             |           | 0.3882353 |
| ENSG00000187048 |            | 0.15757576 |            | 0.157575758 |             |           | 0.2034884 |
| ENSG00000185761 |            | 0.47272727 |            | 0.472727273 | 0.084337349 | 0.0813953 | 0.377907  |
| ENSG00000105397 | 0.32934132 | 0.12121212 | 0.32934132 | 0.121212121 | 0.06547619  |           | 0.0523256 |
| ENSG00000147381 | 0.37222222 |            | 0.37222222 |             | 0.322222222 |           | 0.4431818 |
| ENSG00000126247 |            | 0.06748466 |            | 0.067484663 |             |           |           |
| ENSG00000154122 |            | 0.22424242 |            | 0.224242424 |             |           | 0.255814  |
| ENSG00000163611 | 0.06886228 | 0.47272727 | 0.06886228 | 0.472727273 | 0.071428571 | 0.125     | 0.1941176 |
| ENSG00000085491 | 0.42777778 | 0.23333333 | 0.42777778 | 0.233333333 |             |           | 0.0568182 |
| ENSG00000198087 |            | 0.3447205  |            | 0.344720497 |             |           | 0.4090909 |
| ENSG00000178882 |            | 0.29813665 |            | 0.298136646 |             |           | 0.4825581 |
| ENSG00000171174 |            |            |            |             | 0.077380952 | 0.1918605 | 0.3095238 |
| ENSG00000171160 |            | 0.2125     |            | 0.2125      |             |           | 0.2380952 |
| ENSG00000100027 |            | 0.36060606 |            | 0.360606061 |             |           | 0.3546512 |
| ENSG00000119640 |            | 0.49382716 |            | 0.49382716  |             |           | 0.2294118 |
| ENSG00000183695 |            | 0.2652439  |            | 0.265243902 |             |           | 0.2222222 |

|                 |            |            |            |             |             |           |           |
|-----------------|------------|------------|------------|-------------|-------------|-----------|-----------|
| ENSG00000118402 |            | 0.22159091 |            | 0.221590909 |             |           | 0.1976744 |
| ENSG00000185800 |            | 0.46590909 |            | 0.465909091 |             |           | 0.2954545 |
| ENSG00000163626 |            | 0.45151515 |            | 0.451515152 |             |           | 0.3647059 |
| ENSG00000149488 |            | 0.4847561  |            | 0.484756098 |             |           | 0.4476744 |
| ENSG00000162456 |            | 0.25454545 |            | 0.254545455 |             |           | 0.3837209 |
| ENSG00000213186 | 0.31818182 | 0.4969697  | 0.31818182 | 0.496969697 | 0.181818182 | 0.2666667 | 0.25      |
| ENSG00000033627 |            | 0.11818182 |            | 0.118181818 |             |           | 0.2034884 |
| ENSG00000184058 |            | 0.38484848 |            | 0.384848485 |             |           | 0.3662791 |
| ENSG00000100151 | 0.2        |            | 0.2        |             | 0.363636364 | 0.3522727 |           |
| ENSG00000066427 |            | 0.28888889 |            | 0.288888889 |             |           | 0.4777778 |
| ENSG00000121988 | 0.25748503 | 0.29090909 | 0.25748503 | 0.290909091 | 0.160714286 | 0.1918605 | 0.1941176 |
| ENSG00000133112 | 0.26388889 | 0.39090909 | 0.26388889 | 0.390909091 | 0.36746988  | 0.3117647 | 0.2411765 |
| ENSG00000198090 |            | 0.44827586 |            | 0.448275862 |             |           | 0.4294118 |
| ENSG00000186583 | 0.10179641 |            | 0.10179641 |             |             |           |           |
| ENSG00000013561 | 0.18589744 | 0.44444444 | 0.18589744 | 0.444444444 |             |           |           |
| ENSG00000008405 | 0.43181818 | 0.41104294 | 0.43181818 | 0.411042945 | 0.329545455 | 0.2380952 | 0.2411765 |
| ENSG00000039319 |            | 0.07317073 |            | 0.073170732 |             |           |           |
| ENSG00000180834 |            | 0.48787879 |            | 0.487878788 |             |           | 0.4882353 |
| ENSG00000105971 |            | 0.49393939 |            | 0.493939394 |             |           | 0.2732558 |
| ENSG00000151773 |            | 0.05555556 |            | 0.055555556 |             |           | 0.3977273 |
| ENSG00000121743 |            | 0.30909091 |            | 0.309090909 |             |           | 0.2965116 |
| ENSG00000166292 | 0.36826347 |            | 0.36826347 |             | 0.238095238 | 0.2674419 |           |
| ENSG00000170417 |            | 0.36728395 |            | 0.367283951 |             |           | 0.3176471 |
| ENSG00000196189 |            | 0.35454545 |            | 0.354545455 |             |           | 0.0697674 |
| ENSG00000174482 |            |            |            |             |             | 0.0795455 | 0.1860465 |
| ENSG00000135111 | 0.09883721 | 0.24242424 | 0.09883721 | 0.242424242 | 0.488095238 | 0.4047619 | 0.4404762 |
| ENSG00000112175 | 0.07777778 | 0.1969697  | 0.07777778 | 0.196969697 |             |           | 0.244186  |
| ENSG00000136280 | 0.3313253  | 0.43023256 | 0.3313253  | 0.430232558 | 0.208333333 | 0.1411765 | 0.2619048 |
| ENSG00000134717 | 0.32335329 |            | 0.32335329 |             | 0.130952381 | 0.0813953 | 0.0813953 |
| ENSG00000114638 |            |            |            |             | 0.244444444 | 0.1686047 |           |
| ENSG00000056736 |            | 0.33333333 |            | 0.333333333 |             |           | 0.4880952 |
| ENSG00000143303 | 0.13939394 |            | 0.13939394 |             | 0.096385542 | 0.0833333 |           |
| ENSG00000142684 | 0.12777778 | 0.38953488 | 0.12777778 | 0.389534884 | 0.243902439 | 0.2621951 | 0.3430233 |
| ENSG00000090520 | 0.48203593 |            | 0.48203593 |             | 0.125       | 0.1744186 |           |
| ENSG00000135100 |            | 0.38181818 |            | 0.381818182 |             |           | 0.3604651 |
| ENSG00000121075 |            | 0.19393939 |            | 0.193939394 |             |           | 0.0813953 |
| ENSG00000162695 |            | 0.28181818 |            | 0.281818182 |             |           | 0.0697674 |
| ENSG00000166326 |            | 0.33888889 |            | 0.338888889 |             |           | 0.2272727 |
| ENSG00000165434 |            | 0.42424242 |            | 0.424242424 |             |           | 0.4418605 |
| ENSG00000060339 | 0.05151515 | 0.12424242 | 0.05151515 | 0.124242424 | 0.331325301 | 0.3313953 | 0.3313953 |
| ENSG00000167005 |            | 0.38787879 |            | 0.387878788 |             |           | 0.3352941 |
| ENSG00000198554 | 0.06287425 | 0.49695122 | 0.06287425 | 0.49695122  |             | 0.0523256 | 0.2267442 |
| ENSG00000221910 | 0.23652695 | 0.36280488 | 0.23652695 | 0.362804878 | 0.5         | 0.494186  | 0.4941176 |
| ENSG00000164107 |            | 0.45757576 |            | 0.457575758 |             |           | 0.4127907 |
| ENSG00000157107 |            | 0.47826087 |            | 0.47826087  |             |           | 0.4702381 |
| ENSG00000182934 | 0.06111111 | 0.24695122 | 0.06111111 | 0.24695122  |             |           | 0.1764706 |
| ENSG00000213588 | 0.05681818 |            | 0.05681818 |             | 0.344444444 | 0.25      |           |
| ENSG00000159398 | 0.42771084 |            | 0.42771084 |             | 0.369047619 | 0.4117647 |           |
| ENSG00000164049 | 0.25149701 |            | 0.25149701 |             | 0.321428571 | 0.4186047 |           |
| ENSG00000122787 |            | 0.2        |            | 0.2         |             |           | 0.2209302 |
| ENSG00000143028 |            | 0.3030303  |            | 0.303030303 |             |           |           |
| ENSG00000055732 |            | 0.48484848 |            | 0.484848485 |             |           | 0.4069767 |
| ENSG00000073331 |            | 0.49444444 |            | 0.494444444 |             |           | 0.3837209 |
| ENSG00000021574 |            | 0.28658537 |            | 0.286585366 |             |           | 0.4352941 |

|                 |            |            |            |             |             |           |           |
|-----------------|------------|------------|------------|-------------|-------------|-----------|-----------|
| ENSG00000103248 |            | 0.325      |            | 0.325       |             |           | 0.4244186 |
| ENSG00000118898 |            | 0.48765432 |            | 0.487654321 |             |           | 0.3430233 |
| ENSG00000137509 | 0.34848485 | 0.40909091 | 0.34848485 | 0.409090909 |             |           | 0.2034884 |
| ENSG00000253846 |            | 0.20224719 |            | 0.202247191 |             |           | 0.1477273 |
| ENSG00000083168 | 0.13772455 |            | 0.13772455 |             | 0.433333333 | 0.25      |           |
| ENSG00000135837 |            | 0.05172414 |            | 0.051724138 |             |           |           |
| ENSG00000073598 |            |            |            |             |             |           | 0.1395349 |
| ENSG00000165125 | 0.36826347 |            | 0.36826347 |             |             |           |           |
| ENSG00000171163 |            |            |            |             |             |           | 0.2       |
| ENSG00000123219 |            |            |            |             |             |           | 0.0813953 |
| ENSG00000258227 |            | 0.2969697  |            | 0.296969697 |             |           | 0.4011628 |
| ENSG00000244291 |            |            |            |             |             |           | 0.3255814 |
| ENSG00000196739 |            | 0.43636364 |            | 0.436363636 |             |           | 0.4941176 |
| ENSG00000216895 | 0.45209581 |            | 0.45209581 |             | 0.327380952 | 0.3372093 |           |
| ENSG00000152102 |            | 0.1        |            | 0.1         |             |           | 0.1046512 |
| ENSG00000224531 |            | 0.16666667 |            | 0.166666667 |             |           | 0.3953488 |
| ENSG00000174226 | 0.46407186 | 0.46060606 | 0.46407186 | 0.460606061 | 0.494047619 | 0.4767442 | 0.1511628 |
| ENSG00000159352 |            | 0.24846626 |            | 0.248466258 |             |           | 0.4821429 |
| ENSG00000125971 |            |            |            |             |             |           | 0.1162791 |
| ENSG00000255121 | 0.10795455 |            | 0.10795455 |             |             | 0.1022727 |           |
| ENSG00000056291 | 0.30239521 |            | 0.30239521 |             | 0.463855422 | 0.5       |           |
| ENSG00000004399 |            | 0.15030675 |            | 0.150306748 |             |           | 0.2588235 |
| ENSG00000105507 |            | 0.13939394 |            | 0.139393939 |             |           | 0.1818182 |
| ENSG00000149930 |            | 0.5        |            | 0.5         |             |           | 0.297619  |
| ENSG00000173258 |            | 0.27439024 |            | 0.274390244 |             |           | 0.377907  |
| ENSG00000148498 |            | 0.11111111 |            | 0.111111111 |             |           | 0.1744186 |
| ENSG00000125089 | 0.46363636 | 0.36666667 | 0.46363636 | 0.366666667 | 0.327380952 | 0.2764706 | 0.4545455 |
| ENSG00000109265 |            | 0.44785276 |            | 0.447852761 |             |           | 0.3081395 |
| ENSG00000249915 |            | 0.23780488 |            | 0.237804878 |             |           | 0.3197674 |
| ENSG00000138640 | 0.36227545 | 0.35365854 | 0.36227545 | 0.353658537 | 0.333333333 | 0.3953488 | 0.4476744 |
| ENSG00000102078 |            | 0.4537037  |            | 0.453703704 |             |           | 0.372093  |
| ENSG00000134440 | 0.13333333 | 0.45454545 | 0.13333333 | 0.454545455 |             |           | 0.4764706 |
| ENSG00000144713 | 0.39393939 | 0.12424242 | 0.39393939 | 0.124242424 | 0.083333333 | 0.1477273 | 0.0872093 |
| ENSG00000136286 |            | 0.13793103 |            | 0.137931034 |             |           | 0.4011628 |
| ENSG00000125827 |            | 0.4969697  |            | 0.496969697 |             |           | 0.5       |
| ENSG00000255833 |            | 0.49390244 |            | 0.493902439 |             |           | 0.5       |
| ENSG00000100298 |            | 0.44848485 |            | 0.448484848 |             |           | 0.2790698 |
| ENSG00000196139 | 0.49101796 | 0.36931818 | 0.49101796 | 0.369318182 | 0.208333333 | 0.0813953 | 0.1555556 |
| ENSG00000136877 |            | 0.36363636 |            | 0.363636364 |             |           | 0.3470588 |
| ENSG00000130812 |            | 0.11818182 |            | 0.118181818 |             |           |           |
| ENSG00000139926 |            | 0.1969697  |            | 0.196969697 |             |           | 0.4302326 |
| ENSG00000099904 |            | 0.1918239  |            | 0.191823899 |             |           |           |
| ENSG00000074842 |            | 0.08787879 |            | 0.087878788 |             |           | 0.2267442 |
| ENSG00000129282 |            | 0.35454545 |            | 0.354545455 |             |           | 0.2797619 |
| ENSG00000197208 |            | 0.38181818 |            | 0.381818182 |             |           | 0.2674419 |
| ENSG00000115977 |            | 0.18181818 |            | 0.181818182 |             |           | 0.0639535 |
| ENSG00000179954 |            | 0.33850932 |            | 0.338509317 |             |           | 0.3630952 |
| ENSG00000137275 |            |            |            |             |             |           | 0.2616279 |
| ENSG00000185056 | 0.08333333 |            | 0.08333333 |             |             | 0.0666667 |           |
| ENSG00000197084 |            | 0.3445122  |            | 0.344512195 |             |           | 0.25      |
| ENSG00000168781 |            | 0.3        |            | 0.3         |             |           | 0.3895349 |
| ENSG00000173714 | 0.35628743 | 0.32727273 | 0.35628743 | 0.327272727 |             |           | 0.4360465 |
| ENSG00000168621 | 0.35542169 | 0.43939394 | 0.35542169 | 0.439393939 | 0.261904762 | 0.3023256 | 0.4294118 |
| ENSG00000181016 | 0.48802395 | 0.38181818 | 0.48802395 | 0.381818182 | 0.133333333 | 0.0639535 | 0.0523256 |

|                |            |            |            |             |             |  |                     |
|----------------|------------|------------|------------|-------------|-------------|--|---------------------|
| ENSG0000033030 | 0.22865854 |            | 0.22865854 |             | 0.297619048 |  | 0.4146341           |
| ENSG0000117228 | 0.26204819 | 0.38787879 | 0.26204819 | 0.387878788 | 0.071428571 |  | 0.0755814 0.4767442 |
| ENSG0000136003 |            | 0.12222222 |            | 0.12222222  | 0.353658537 |  | 0.3815789 0.1222222 |
| ENSG0000165059 |            | 0.22222222 |            | 0.22222222  |             |  | 0.2386364           |
| ENSG0000147874 | 0.20555556 | 0.33030303 | 0.20555556 | 0.33030303  | 0.154761905 |  | 0.1117647 0.1860465 |
| ENSG0000161888 |            | 0.07303371 |            | 0.073033708 |             |  |                     |
| ENSG0000124140 |            | 0.26111111 |            | 0.26111111  |             |  | 0.4333333           |
| ENSG0000085998 |            | 0.34545455 |            | 0.345454545 |             |  | 0.202381            |
| ENSG0000187912 |            | 0.34242424 |            | 0.34242424  |             |  | 0.4302326           |
| ENSG0000130881 |            |            |            |             |             |  | 0.4235294           |
| ENSG0000212743 |            | 0.23333333 |            | 0.23333333  |             |  | 0.3023256           |
| ENSG0000173085 |            | 0.27710843 |            | 0.277108434 |             |  |                     |
| ENSG0000136319 | 0.26047904 | 0.49090909 | 0.26047904 | 0.490909091 | 0.148809524 |  | 0.2151163 0.4709302 |
| ENSG0000126804 |            | 0.41515152 |            | 0.415151515 |             |  | 0.3546512           |
| ENSG0000111729 | 0.41916168 | 0.22121212 | 0.41916168 | 0.221212121 |             |  | 0.0930233           |
| ENSG0000101290 |            | 0.47272727 |            | 0.472727273 |             |  | 0.4555556           |
| ENSG0000175040 |            | 0.34848485 |            | 0.348484848 |             |  | 0.25                |
| ENSG0000060140 | 0.49698795 | 0.46060606 | 0.49698795 | 0.460606061 | 0.464285714 |  | 0.4186047 0.2529412 |
| ENSG0000256040 | 0.21856287 | 0.43333333 | 0.21856287 | 0.433333333 | 0.285714286 |  | 0.4069767 0.0930233 |
| ENSG0000171649 | 0.16477273 | 0.13030303 | 0.16477273 | 0.13030303  | 0.193181818 |  | 0.1590909 0.1470588 |
| ENSG0000106789 | 0.15060241 | 0.31515152 | 0.15060241 | 0.315151515 | 0.277777778 |  | 0.2045455 0.3255814 |
| ENSG0000198848 |            |            |            |             | 0.068181818 |  |                     |
| ENSG0000080511 |            | 0.47752809 |            | 0.47752809  |             |  | 0.3888889           |
| ENSG0000113407 | 0.4491018  | 0.16969697 | 0.4491018  | 0.16969697  | 0.320512821 |  | 0.2763158 0.2151163 |
| ENSG0000175868 | 0.42613636 | 0.31515152 | 0.42613636 | 0.315151515 | 0.266666667 |  | 0.3 0.2965116       |
| ENSG0000112874 |            | 0.34756098 |            | 0.347560976 |             |  | 0.4709302           |
| ENSG0000174606 |            | 0.30182927 |            | 0.301829268 |             |  | 0.4593023           |
| ENSG0000147854 |            | 0.10909091 |            | 0.109090909 |             |  | 0.255814            |
| ENSG0000178175 | 0.10778443 | 0.13888889 | 0.10778443 | 0.138888889 | 0.404761905 |  | 0.4302326           |
| ENSG0000146409 |            | 0.05151515 |            | 0.051515152 |             |  | 0.0697674           |
| ENSG0000134046 |            | 0.44848485 |            | 0.448484848 |             |  | 0.3430233           |
| ENSG0000163803 | 0.29041916 | 0.44242424 | 0.29041916 | 0.442424242 | 0.125       |  | 0.1918605 0.3430233 |
| ENSG0000197381 |            | 0.44242424 |            | 0.442424242 |             |  | 0.4360465           |
| ENSG0000213949 | 0.28977273 | 0.42528736 | 0.28977273 | 0.425287356 | 0.244444444 |  | 0.3068182 0.5       |
| ENSG0000108829 |            | 0.42424242 |            | 0.424242424 |             |  | 0.127907            |
| ENSG0000145087 |            | 0.38109756 |            | 0.381097561 |             |  | 0.125               |
| ENSG0000159377 | 0.1497006  |            | 0.1497006  |             | 0.43452381  |  | 0.4882353           |
| ENSG0000108001 |            | 0.2969697  |            | 0.296969697 |             |  | 0.3372093           |
| ENSG0000147471 |            | 0.16969697 |            | 0.16969697  |             |  | 0.2848837           |
| ENSG0000030304 | 0.27844311 |            | 0.27844311 |             | 0.053571429 |  |                     |
| ENSG0000248099 |            | 0.3803681  |            | 0.380368098 |             |  | 0.3647059           |
| ENSG0000065361 |            | 0.3969697  |            | 0.396969697 |             |  | 0.3662791           |
| ENSG0000204446 |            | 0.42121212 |            | 0.421212121 |             |  | 0.3430233           |
| ENSG0000131781 | 0.25       | 0.1030303  | 0.25       | 0.103030303 | 0.055555556 |  | 0.0681818           |
| ENSG0000107731 |            | 0.19662921 |            | 0.196629213 |             |  | 0.3977273           |
| ENSG0000022267 |            | 0.4030303  |            | 0.403030303 |             |  | 0.3255814           |
| ENSG0000164074 | 0.20658683 | 0.44848485 | 0.20658683 | 0.448484848 | 0.285714286 |  | 0.3255814 0.3255814 |
| ENSG0000244509 |            | 0.33522727 |            | 0.335227273 |             |  | 0.4777778           |
| ENSG0000165757 |            | 0.44512195 |            | 0.445121951 |             |  | 0.4411765           |
| ENSG0000166501 |            | 0.48484848 |            | 0.484848485 |             |  | 0.4883721           |
| ENSG0000166170 |            | 0.42727273 |            | 0.427272727 |             |  | 0.1569767           |
| ENSG0000104635 | 0.41477273 | 0.38181818 | 0.41477273 | 0.381818182 | 0.188888889 |  | 0.1477273 0.372093  |
| ENSG0000108961 |            |            |            |             |             |  | 0.3977273           |
| ENSG0000011677 | 0.48795181 |            | 0.48795181 |             | 0.409638554 |  | 0.4069767           |

|                 |            |            |            |             |             |           |           |
|-----------------|------------|------------|------------|-------------|-------------|-----------|-----------|
| ENSG00000159387 | 0.08682635 | 0.42331288 | 0.08682635 | 0.423312883 |             |           | 0.4534884 |
| ENSG00000162368 |            | 0.47865854 |            | 0.478658537 |             |           | 0.4244186 |
| ENSG00000165186 |            | 0.4969697  |            | 0.496969697 |             |           | 0.3409091 |
| ENSG00000179387 |            | 0.08787879 |            | 0.087878788 |             |           |           |
| ENSG00000167671 |            | 0.44512195 |            | 0.445121951 |             |           | 0.3058824 |
| ENSG00000079156 | 0.20658683 | 0.40184049 | 0.20658683 | 0.401840491 | 0.226190476 | 0.3197674 | 0.4244186 |
| ENSG00000156795 | 0.3373494  | 0.35       | 0.3373494  | 0.35        | 0.445783133 | 0.3662791 | 0.3863636 |
| ENSG00000226746 | 0.28143713 | 0.06363636 | 0.28143713 | 0.063636364 |             |           |           |
| ENSG00000162959 |            | 0.07878788 |            | 0.078787879 |             |           | 0.1569767 |
| ENSG00000182050 | 0.49700599 |            | 0.49700599 |             | 0.05952381  | 0.1117647 |           |
| ENSG00000119547 |            | 0.31666667 |            | 0.316666667 |             |           | 0.4886364 |
| ENSG00000072849 |            | 0.13030303 |            | 0.13030303  |             |           | 0.0697674 |
| ENSG00000148180 | 0.16467066 | 0.1595092  | 0.16467066 | 0.159509202 | 0.369047619 | 0.3139535 |           |
| ENSG00000184434 |            | 0.05       |            | 0.05        |             |           | 0.3522727 |
| ENSG00000155542 | 0.36826347 | 0.35454545 | 0.36826347 | 0.354545455 | 0.43452381  | 0.3662791 | 0.0639535 |
| ENSG00000100889 |            | 0.20909091 |            | 0.209090909 |             |           | 0.2857143 |
| ENSG00000080824 |            | 0.07777778 |            | 0.077777778 |             |           | 0.0568182 |
| ENSG00000179715 |            |            |            |             | 0.273809524 | 0.2209302 |           |
| ENSG00000054598 |            | 0.42777778 |            | 0.427777778 |             |           | 0.1802326 |
| ENSG00000135164 | 0.24550898 |            | 0.24550898 |             | 0.345238095 | 0.4651163 | 0.0777778 |
| ENSG00000231421 | 0.4011976  |            | 0.4011976  |             | 0.166666667 | 0.2666667 |           |
| ENSG00000118369 |            | 0.15151515 |            | 0.151515152 | 0.31547619  | 0.4709302 | 0.4883721 |
| ENSG00000150687 |            | 0.19135802 |            | 0.191358025 |             |           | 0.4302326 |
| ENSG00000188126 | 0.46407186 |            | 0.46407186 |             | 0.379518072 | 0.4186047 |           |
| ENSG00000171700 |            | 0.30246914 |            | 0.302469136 |             |           | 0.1882353 |
| ENSG00000132465 |            |            |            |             |             |           | 0.3863636 |
| ENSG00000171772 | 0.23333333 | 0.10606061 | 0.23333333 | 0.106060606 | 0.144444444 | 0.1590909 | 0.2616279 |
| ENSG00000129007 | 0.26347305 | 0.46363636 | 0.26347305 | 0.463636364 | 0.196428571 | 0.1647059 | 0.4709302 |
| ENSG00000172551 | 0.28915663 |            | 0.28915663 |             | 0.136904762 | 0.1529412 |           |
| ENSG00000126214 | 0.21257485 | 0.43209877 | 0.21257485 | 0.432098765 | 0.261904762 | 0.2965116 | 0.4880952 |
| ENSG00000197746 | 0.19480519 | 0.30606061 | 0.19480519 | 0.306060606 | 0.202380952 | 0.2804878 | 0.4011628 |
| ENSG00000166265 |            | 0.42424242 |            | 0.424242424 |             |           | 0.3488372 |
| ENSG00000204314 |            |            |            |             | 0.148809524 | 0.2732558 |           |
| ENSG00000140391 | 0.26347305 | 0.32012195 | 0.26347305 | 0.320121951 | 0.493975904 | 0.4941176 | 0.494186  |
| ENSG00000029153 |            | 0.13030303 |            | 0.13030303  |             |           | 0.1453488 |
| ENSG00000143816 |            | 0.40909091 |            | 0.409090909 |             |           | 0.3837209 |
| ENSG00000101407 |            | 0.46969697 |            | 0.46969697  |             |           | 0.3690476 |
| ENSG00000149289 | 0.36826347 | 0.29393939 | 0.36826347 | 0.293939394 | 0.333333333 | 0.3235294 | 0.3546512 |
| ENSG00000019582 |            | 0.12424242 |            | 0.124242424 |             |           | 0.3255814 |
| ENSG00000060566 |            |            |            |             | 0.101190476 | 0.0872093 | 0.2840909 |
| ENSG00000108821 |            | 0.31818182 |            | 0.318181818 |             |           | 0.4186047 |
| ENSG00000126870 |            | 0.28963415 |            | 0.289634146 |             |           | 0.3081395 |
| ENSG00000138032 | 0.35329341 |            | 0.35329341 |             | 0.416666667 | 0.4069767 |           |
| ENSG00000128791 |            | 0.45151515 |            | 0.451515152 |             |           | 0.4709302 |
| ENSG00000167703 |            | 0.44242424 |            | 0.442424242 |             |           | 0.4651163 |
| ENSG00000237289 |            | 0.07317073 |            | 0.073170732 |             |           | 0.3095238 |
| ENSG00000165813 | 0.05421687 | 0.08484848 | 0.05421687 | 0.084848485 |             |           |           |
| ENSG00000163492 |            | 0.39090909 |            | 0.390909091 |             |           | 0.4186047 |
| ENSG00000184254 |            | 0.43333333 |            | 0.433333333 |             |           | 0.4302326 |
| ENSG00000253819 | 0.32777778 |            | 0.32777778 |             | 0.333333333 | 0.4883721 |           |
| ENSG00000111206 |            | 0.19090909 |            | 0.190909091 |             |           | 0.2616279 |
| ENSG00000007372 | 0.4760479  | 0.46629213 | 0.4760479  | 0.466292135 | 0.464285714 | 0.4767442 | 0.4772727 |
| ENSG00000160973 | 0.45508982 |            | 0.45508982 |             | 0.321428571 | 0.25      |           |
| ENSG00000185917 | 0.44011976 | 0.32407407 | 0.44011976 | 0.324074074 | 0.31547619  | 0.244186  | 0.4418605 |





|                 |            |            |            |             |             |           |           |
|-----------------|------------|------------|------------|-------------|-------------|-----------|-----------|
| ENSG00000135052 | 0.4        |            | 0.4        |             | 0.44047619  | 0.4767442 | 0.4418605 |
| ENSG00000127922 |            | 0.33333333 |            | 0.33333333  |             |           | 0.127907  |
| ENSG00000109775 |            | 0.22865854 |            | 0.228658537 |             |           | 0.1802326 |
| ENSG00000122733 | 0.3373494  | 0.48181818 | 0.3373494  | 0.481818182 | 0.375       | 0.4069767 | 0.4534884 |
| ENSG00000109654 |            | 0.17222222 |            | 0.172222222 |             |           | 0.2386364 |
| ENSG00000127152 |            | 0.29393939 |            | 0.293939394 |             |           | 0.1627907 |
| ENSG00000135905 | 0.46107784 | 0.4695122  | 0.46107784 | 0.469512195 | 0.475903614 | 0.2941176 | 0.3546512 |
| ENSG00000171049 |            | 0.08333333 |            | 0.083333333 |             |           | 0.0888889 |
| ENSG00000100416 |            | 0.17272727 |            | 0.172727273 |             |           |           |
| ENSG00000101425 | 0.10795455 | 0.43333333 | 0.10795455 | 0.433333333 | 0.477777778 | 0.3372093 | 0.5       |
| ENSG00000140323 |            | 0.17088608 |            | 0.170886076 |             |           | 0.4883721 |
| ENSG00000163328 |            | 0.32777778 |            | 0.327777778 |             |           | 0.3181818 |
| ENSG00000080503 | 0.24096386 |            | 0.24096386 |             | 0.178571429 | 0.2560976 |           |
| ENSG00000035687 |            | 0.16666667 |            | 0.166666667 |             |           | 0.2674419 |
| ENSG00000184937 | 0.17977528 | 0.28181818 | 0.17977528 | 0.281818182 | 0.295180723 | 0.4235294 | 0.3588235 |
| ENSG00000120057 |            | 0.20606061 |            | 0.206060606 |             |           | 0.4418605 |
| ENSG00000177494 | 0.32934132 | 0.05454545 | 0.32934132 | 0.054545455 | 0.101190476 | 0.0764706 |           |
| ENSG00000185130 | 0.25       |            | 0.25       |             | 0.088888889 | 0.0777778 |           |
| ENSG00000147160 |            | 0.25914634 |            | 0.259146341 |             |           | 0.2732558 |
| ENSG00000157110 |            | 0.21515152 |            | 0.215151515 |             |           | 0.1162791 |
| ENSG00000132718 | 0.31736527 | 0.38787879 | 0.31736527 | 0.387878788 | 0.279761905 | 0.2117647 | 0.2034884 |
| ENSG00000124767 | 0.26946108 | 0.13333333 | 0.26946108 | 0.133333333 | 0.446428571 | 0.4651163 | 0.1918605 |
| ENSG00000065413 |            | 0.29090909 |            | 0.290909091 |             |           | 0.1686047 |
| ENSG00000138777 |            | 0.48181818 |            | 0.481818182 |             |           | 0.2965116 |
| ENSG00000197651 |            |            |            |             | 0.279761905 | 0.244186  |           |
| ENSG00000156486 |            | 0.23636364 |            | 0.236363636 |             |           | 0.2209302 |
| ENSG00000072062 |            | 0.11818182 |            | 0.118181818 |             |           |           |
| ENSG00000173818 |            | 0.32424242 |            | 0.324242424 |             |           | 0.422619  |
| ENSG00000157557 |            | 0.43529412 |            | 0.435294118 |             |           | 0.2267442 |
| ENSG00000164342 | 0.13855422 |            | 0.13855422 |             | 0.232142857 | 0.2965116 |           |
| ENSG00000123388 |            | 0.27300613 |            | 0.273006135 |             |           | 0.172619  |
| ENSG00000221996 | 0.22413793 |            | 0.22413793 |             | 0.284090909 | 0.2727273 |           |
| ENSG00000169635 |            | 0.31515152 |            | 0.315151515 |             |           | 0.4651163 |
| ENSG00000166535 |            | 0.26060606 |            | 0.260606061 |             |           | 0.4244186 |
| ENSG00000188559 |            | 0.43597561 |            | 0.43597561  |             |           | 0.2209302 |
| ENSG00000185219 |            | 0.2962963  |            | 0.296296296 |             |           |           |
| ENSG00000135205 | 0.24550898 | 0.35454545 | 0.24550898 | 0.354545455 | 0.458333333 | 0.3430233 | 0.1860465 |
| ENSG00000151612 |            | 0.09393939 |            | 0.093939394 |             |           |           |
| ENSG00000161542 |            |            |            |             |             |           | 0.0930233 |
| ENSG00000135443 |            | 0.49390244 |            | 0.493902439 |             |           | 0.4127907 |
| ENSG00000164056 | 0.30838323 | 0.27878788 | 0.30838323 | 0.278787879 | 0.380952381 | 0.3154762 | 0.3197674 |
| ENSG00000136859 |            | 0.37575758 |            | 0.375757576 |             |           | 0.2151163 |
| ENSG00000138411 | 0.2005988  | 0.30792683 | 0.2005988  | 0.307926829 |             |           | 0.3546512 |
| ENSG00000140987 | 0.41666667 | 0.37222222 | 0.41666667 | 0.372222222 | 0.155555556 | 0.1477273 | 0.3       |
| ENSG00000133398 |            | 0.46646341 |            | 0.466463415 |             |           | 0.4470588 |
| ENSG00000175003 |            | 0.43597561 |            | 0.43597561  | 0.126506024 | 0.1294118 | 0.2034884 |
| ENSG00000108733 | 0.09580838 | 0.30232558 | 0.09580838 | 0.302325581 | 0.136904762 | 0.1511628 | 0.3181818 |
| ENSG00000153820 |            | 0.08045977 |            | 0.08045977  |             |           | 0.2906977 |
| ENSG00000128805 | 0.4939759  | 0.42424242 | 0.4939759  | 0.424242424 | 0.303571429 | 0.4709302 | 0.3546512 |
| ENSG00000023287 | 0.17222222 |            | 0.17222222 |             |             |           |           |
| ENSG00000099817 |            | 0.35757576 |            | 0.357575758 | 0.365853659 | 0.3857143 | 0.4302326 |
| ENSG00000105889 | 0.16111111 | 0.44242424 | 0.16111111 | 0.442424242 |             |           | 0.4588235 |
| ENSG00000094963 |            | 0.31111111 |            | 0.311111111 |             |           | 0.2797619 |
| ENSG00000254967 |            |            |            |             | 0.113095238 | 0.0523256 |           |

|                 |            |            |            |             |             |           |           |
|-----------------|------------|------------|------------|-------------|-------------|-----------|-----------|
| ENSG00000162714 |            | 0.36969697 |            | 0.36969697  |             |           | 0.4883721 |
| ENSG00000116675 |            | 0.44848485 |            | 0.448484848 |             |           | 0.1686047 |
| ENSG00000173905 |            | 0.05182927 |            | 0.051829268 |             |           | 0.1046512 |
| ENSG00000147649 |            | 0.33333333 |            | 0.333333333 |             |           | 0.375     |
| ENSG00000148704 |            | 0.2969697  |            | 0.296969697 |             |           | 0.3953488 |
| ENSG00000183077 |            | 0.24085366 |            | 0.240853659 |             |           | 0.1686047 |
| ENSG00000165280 |            | 0.21515152 |            | 0.215151515 |             |           | 0.0588235 |
| ENSG00000174574 |            | 0.37575758 |            | 0.375757576 | 0.098765432 | 0.1309524 | 0.3488372 |
| ENSG00000183161 |            | 0.13636364 |            | 0.136363636 | 0.255952381 | 0.1686047 | 0.0988372 |
| ENSG00000140968 |            | 0.48888889 |            | 0.488888889 |             |           | 0.3953488 |
| ENSG00000074706 |            | 0.45757576 |            | 0.457575758 |             |           | 0.4888889 |
| ENSG00000180998 |            | 0.16060606 |            | 0.160606061 |             |           | 0.2222222 |
| ENSG00000181817 | 0.0873494  |            | 0.0873494  |             | 0.079268293 | 0.1144578 |           |
| ENSG00000073861 |            | 0.22727273 |            | 0.227272727 |             |           |           |
| ENSG00000180574 |            | 0.26993865 |            | 0.26993865  |             |           | 0.152439  |
| ENSG00000087053 | 0.05722892 | 0.38484848 | 0.05722892 | 0.384848485 | 0.313253012 | 0.3488372 | 0.3452381 |
| ENSG00000172673 |            | 0.5        |            | 0.5         |             |           |           |
| ENSG00000238244 |            | 0.43333333 |            | 0.433333333 |             |           | 0.4659091 |
| ENSG00000177234 |            | 0.47272727 |            | 0.472727273 |             |           | 0.3895349 |
| ENSG00000188467 |            |            |            |             |             |           | 0.4593023 |
| ENSG00000118492 | 0.38554217 | 0.47575758 | 0.38554217 | 0.475757576 | 0.089285714 | 0.1802326 | 0.4593023 |
| ENSG00000198482 |            | 0.35454545 |            | 0.354545455 |             |           | 0.4659091 |
| ENSG00000198000 | 0.23652695 | 0.47530864 | 0.23652695 | 0.475308642 | 0.083333333 | 0.2383721 | 0.3571429 |
| ENSG00000183741 |            | 0.31212121 |            | 0.312121212 |             |           | 0.4411765 |
| ENSG00000135338 | 0.05722892 | 0.05       | 0.05722892 | 0.05        |             |           | 0.0697674 |
| ENSG00000145216 |            | 0.15730337 |            | 0.157303371 |             |           | 0.1976744 |
| ENSG00000115806 | 0.30838323 | 0.05792683 | 0.30838323 | 0.057926829 | 0.06547619  | 0.0872093 | 0.3352941 |
| ENSG00000165948 | 0.22155689 |            | 0.22155689 |             |             | 0.0988372 |           |
| ENSG00000101577 |            | 0.39156627 |            | 0.391566265 |             |           | 0.3837209 |
| ENSG00000153253 | 0.1257485  |            | 0.1257485  |             |             |           |           |
| ENSG00000011454 |            | 0.17777778 |            | 0.177777778 |             |           | 0.2529412 |
| ENSG00000138669 |            |            |            |             |             |           | 0.3430233 |
| ENSG00000184635 |            | 0.18888889 |            | 0.188888889 |             |           | 0.2840909 |
| ENSG00000137204 |            | 0.13030303 |            | 0.13030303  |             |           |           |
| ENSG00000240224 |            | 0.22777778 |            | 0.227777778 |             |           | 0.1590909 |
| ENSG00000108592 |            | 0.38888889 |            | 0.388888889 | 0.410714286 | 0.4011628 | 0.4545455 |
| ENSG00000133393 |            | 0.42378049 |            | 0.423780488 |             |           | 0.3068182 |
| ENSG00000139354 |            | 0.3        |            | 0.3         | 0.469879518 | 0.4302326 | 0.2386364 |
| ENSG00000112972 | 0.35454545 | 0.48333333 | 0.35454545 | 0.483333333 | 0.2         | 0.2777778 | 0.2159091 |
| ENSG00000118939 |            | 0.19090909 |            | 0.190909091 |             |           | 0.0523256 |
| ENSG00000011021 |            | 0.16969697 |            | 0.16969697  |             |           | 0.0639535 |
| ENSG00000169169 | 0.35555556 |            | 0.35555556 |             | 0.27777778  | 0.2272727 |           |
| ENSG00000144655 | 0.11676647 | 0.2195122  | 0.11676647 | 0.219512195 | 0.160714286 |           | 0.2176471 |
| ENSG00000132837 | 0.39759036 | 0.4847561  | 0.39759036 | 0.484756098 | 0.172619048 | 0.2616279 | 0.2840909 |
| ENSG00000198947 | 0.16292135 | 0.31111111 | 0.16292135 | 0.311111111 | 0.1         | 0.1704545 | 0.3522727 |
| ENSG00000254004 |            | 0.25       |            | 0.25        |             |           | 0.125     |
| ENSG00000244607 |            | 0.26060606 |            | 0.260606061 |             |           | 0.3488372 |
| ENSG00000143919 |            | 0.15517241 |            | 0.155172414 |             |           |           |
| ENSG00000160741 |            | 0.26666667 |            | 0.266666667 |             |           | 0.2941176 |
| ENSG00000075643 |            | 0.28797468 |            | 0.287974684 |             |           | 0.2678571 |
| ENSG00000089351 | 0.26047904 |            | 0.26047904 |             | 0.107142857 | 0.1860465 |           |
| ENSG00000177663 |            | 0.46111111 |            | 0.461111111 | 0.37777778  | 0.4069767 | 0.4069767 |
| ENSG00000182095 |            | 0.284375   |            | 0.284375    | 0.125       | 0.2804878 | 0.1395349 |
| ENSG00000112303 |            | 0.26993865 |            | 0.26993865  | 0.333333333 | 0.3444444 | 0.3255814 |

|                 |            |            |            |             |             |           |           |
|-----------------|------------|------------|------------|-------------|-------------|-----------|-----------|
| ENSG00000106302 | 0.18072289 |            | 0.18072289 |             |             |           |           |
| ENSG00000186260 |            | 0.1        |            | 0.1         |             |           | 0.3863636 |
| ENSG00000165325 | 0.46932515 | 0.3908046  | 0.46932515 | 0.390804598 | 0.088888889 | 0.2732558 | 0.494186  |
| ENSG00000094880 |            | 0.35889571 |            | 0.358895706 |             |           | 0.4418605 |
| ENSG00000147041 | 0.19760479 | 0.43902439 | 0.19760479 | 0.43902439  | 0.174698795 | 0.1555556 | 0.4186047 |
| ENSG00000138190 |            | 0.42727273 |            | 0.427272727 |             |           | 0.4244186 |
| ENSG00000167011 |            | 0.36666667 |            | 0.366666667 |             |           | 0.4883721 |
| ENSG00000134489 |            | 0.38181818 |            | 0.381818182 |             |           | 0.3604651 |
| ENSG00000109814 | 0.49698795 | 0.47865854 | 0.49698795 | 0.478658537 | 0.414634146 | 0.3588235 | 0.4333333 |
| ENSG00000196296 |            | 0.33939394 |            | 0.339393939 |             |           | 0.1395349 |
| ENSG00000163297 | 0.44848485 | 0.21818182 | 0.44848485 | 0.218181818 | 0.234567901 | 0.25      |           |
| ENSG00000105750 |            |            |            |             |             |           | 0.2333333 |
| ENSG00000225607 |            | 0.16969697 |            | 0.16969697  |             |           | 0.1       |
| ENSG00000168309 | 0.2754491  | 0.06969697 | 0.2754491  | 0.06969697  | 0.476190476 | 0.3953488 | 0.1845238 |
| ENSG00000180219 | 0.2439759  | 0.31609195 | 0.2439759  | 0.316091954 | 0.067073171 | 0.1470588 | 0.3662791 |
| ENSG00000113389 | 0.32831325 | 0.46646341 | 0.32831325 | 0.466463415 | 0.095238095 | 0.0813953 | 0.4244186 |
| ENSG00000104312 | 0.08888889 | 0.05454545 | 0.08888889 | 0.054545455 | 0.222222222 | 0.125     | 0.1588235 |
| ENSG00000124207 |            | 0.4054878  |            | 0.405487805 |             |           | 0.297619  |
| ENSG00000068366 |            |            |            |             |             |           | 0.0681818 |
| ENSG00000161996 |            | 0.35365854 |            | 0.353658537 |             |           | 0.2674419 |
| ENSG00000175520 |            | 0.29393939 |            | 0.293939394 |             |           | 0.2034884 |
| ENSG00000119042 | 0.35       | 0.32012195 | 0.35       | 0.320121951 |             |           | 0.2267442 |
| ENSG00000070190 | 0.3253012  | 0.23939394 | 0.3253012  | 0.239393939 | 0.404761905 | 0.4702381 | 0.2108434 |
| ENSG00000125703 |            | 0.4054878  |            | 0.405487805 |             |           | 0.3255814 |
| ENSG00000137714 |            | 0.15555556 |            | 0.155555556 |             |           | 0.2588235 |
| ENSG00000184207 |            | 0.46666667 |            | 0.466666667 |             |           | 0.3313953 |
| ENSG00000100503 |            | 0.42424242 |            | 0.424242424 |             |           | 0.2674419 |
| ENSG00000108602 | 0.1369863  | 0.38484848 | 0.1369863  | 0.384848485 | 0.2         | 0.0972222 | 0.4709302 |
| ENSG00000105784 |            | 0.07878788 |            | 0.078787879 |             |           | 0.1807229 |
| ENSG00000189332 | 0.16049383 | 0.4875     | 0.16049383 | 0.4875      | 0.142857143 | 0.1625    | 0.4216867 |
| ENSG00000085978 | 0.2826087  | 0.44817073 | 0.2826087  | 0.448170732 | 0.386904762 | 0.2093023 | 0.4117647 |
| ENSG00000156381 | 0.09580838 |            | 0.09580838 |             | 0.285714286 | 0.244186  |           |
| ENSG00000123684 |            | 0.30792683 |            | 0.307926829 |             |           | 0.297619  |
| ENSG00000104973 | 0.05389222 |            | 0.05389222 |             | 0.148809524 | 0.1162791 | 0.0930233 |
| ENSG00000144677 |            | 0.16363636 |            | 0.163636364 |             |           |           |
| ENSG00000074696 | 0.36309524 | 0.2        | 0.36309524 | 0.2         |             |           |           |
| ENSG00000018236 |            | 0.4        |            | 0.4         |             |           | 0.4360465 |
| ENSG00000006025 | 0.0505618  | 0.34848485 | 0.0505618  | 0.348484848 |             |           |           |
| ENSG00000153246 | 0.3988764  | 0.42121212 | 0.3988764  | 0.421212121 | 0.272727273 | 0.4069767 | 0.3313953 |
| ENSG00000175198 | 0.12222222 |            | 0.12222222 |             |             |           |           |
| ENSG00000165695 |            |            |            |             | 0.339285714 | 0.3081395 |           |
| ENSG00000173674 |            | 0.15740741 |            | 0.157407407 |             |           | 0.0813953 |
| ENSG00000125872 | 0.23952096 |            | 0.23952096 |             | 0.494047619 | 0.4360465 |           |
| ENSG00000112200 |            | 0.12121212 |            | 0.121212121 |             |           | 0.0795455 |
| ENSG00000151834 | 0.28143713 | 0.49090909 | 0.28143713 | 0.490909091 | 0.196428571 | 0.1395349 | 0.4825581 |
| ENSG00000184459 | 0.05988024 |            | 0.05988024 |             | 0.154761905 | 0.2176471 |           |
| ENSG00000221947 | 0.11676647 | 0.43333333 | 0.11676647 | 0.433333333 | 0.071428571 | 0.1860465 | 0.3977273 |
| ENSG00000163527 |            | 0.0969697  |            | 0.096969697 |             |           |           |
| ENSG00000060749 |            | 0.16666667 |            | 0.166666667 |             |           |           |
| ENSG00000229387 |            | 0.16666667 |            | 0.166666667 |             |           | 0.1686047 |
| ENSG00000198919 | 0.05       | 0.18181818 | 0.05       | 0.181818182 |             |           | 0.4360465 |
| ENSG00000197121 |            | 0.21646341 |            | 0.216463415 |             |           | 0.0872093 |
| ENSG00000146090 | 0.28143713 | 0.47777778 | 0.28143713 | 0.477777778 | 0.279761905 | 0.3139535 | 0.3888889 |
| ENSG00000028310 | 0.13068182 |            | 0.13068182 |             | 0.166666667 | 0.0909091 | 0.2616279 |

|                        |            |            |            |             |             |           |           |
|------------------------|------------|------------|------------|-------------|-------------|-----------|-----------|
| <b>ENSG00000169718</b> | 0.07185629 |            | 0.07185629 |             | 0.089285714 |           | 0.0523256 |
| <b>ENSG00000213494</b> | 0.46407186 |            | 0.46407186 |             | 0.313253012 |           | 0.3197674 |
| <b>ENSG00000159450</b> |            | 0.35       |            | 0.35        |             |           | 0.4666667 |
| <b>ENSG00000178358</b> |            | 0.17575758 |            | 0.175757576 |             |           | 0.4825581 |
| <b>ENSG00000259280</b> | 0.43413174 | 0.33030303 | 0.43413174 | 0.33030303  | 0.363095238 | 0.4593023 | 0.372093  |
| <b>ENSG00000100991</b> |            | 0.36969697 |            | 0.36969697  |             |           | 0.1802326 |
| <b>ENSG00000196109</b> | 0.23652695 | 0.32022472 | 0.23652695 | 0.320224719 | 0.31547619  |           | 0.3197674 |
| <b>ENSG00000176092</b> |            | 0.15151515 |            | 0.151515152 |             |           |           |
| <b>ENSG00000111674</b> |            |            |            |             |             |           | 0.2674419 |
| <b>ENSG00000125450</b> | 0.31111111 | 0.22865854 | 0.31111111 | 0.228658537 | 0.1         | 0.0681818 | 0.0639535 |
| <b>ENSG00000120675</b> |            | 0.48181818 |            | 0.481818182 | 0.125       | 0.0523256 | 0.3511905 |
| <b>ENSG00000111670</b> |            | 0.48787879 |            | 0.487878788 |             |           | 0.3023256 |
| <b>ENSG00000185480</b> | 0.32335329 |            | 0.32335329 |             | 0.458333333 | 0.4941176 |           |
| <b>ENSG00000115041</b> |            |            |            |             |             |           | 0.1046512 |
| <b>ENSG00000074582</b> | 0.14071856 |            | 0.14071856 |             | 0.136904762 | 0.1569767 |           |
| <b>ENSG00000215568</b> |            | 0.42121212 |            | 0.421212121 |             |           | 0.4476744 |
| <b>ENSG00000079215</b> |            | 0.33636364 |            | 0.336363636 |             |           | 0.244186  |
| <b>ENSG00000102189</b> |            | 0.36969697 |            | 0.36969697  |             |           | 0.0697674 |
| <b>ENSG00000133808</b> | 0.27710843 |            | 0.27710843 |             |             | 0.0930233 |           |
| <b>ENSG00000104765</b> | 0.34638554 | 0.44545455 | 0.34638554 | 0.445454545 | 0.119047619 | 0.1686047 | 0.4186047 |
| <b>ENSG00000185880</b> | 0.47005988 | 0.09883721 | 0.47005988 | 0.098837209 | 0.422619048 | 0.2848837 | 0.1463415 |
| <b>ENSG00000174236</b> |            |            |            |             | 0.148809524 | 0.1395349 |           |
| <b>ENSG00000007174</b> | 0.38888889 | 0.4847561  | 0.38888889 | 0.484756098 | 0.333333333 | 0.4418605 | 0.3662791 |
| <b>ENSG00000102710</b> |            | 0.3902439  |            | 0.390243902 |             |           | 0.2674419 |
| <b>ENSG00000230344</b> |            | 0.47777778 |            | 0.477777778 |             |           | 0.4659091 |
| <b>ENSG00000186280</b> |            | 0.13414634 |            | 0.134146341 |             |           |           |
| <b>ENSG00000188295</b> | 0.43113772 | 0.17378049 | 0.43113772 | 0.173780488 | 0.107142857 | 0.1511628 | 0.1395349 |
| <b>ENSG00000157119</b> |            | 0.42331288 |            | 0.423312883 |             |           | 0.3372093 |
| <b>ENSG00000152795</b> |            | 0.4        |            | 0.4         |             |           | 0.3197674 |
| <b>ENSG00000180626</b> | 0.13333333 | 0.12424242 | 0.13333333 | 0.124242424 | 0.494047619 | 0.4883721 | 0.0813953 |
| <b>ENSG00000157181</b> |            | 0.37804878 |            | 0.37804878  |             |           | 0.3433735 |
| <b>ENSG00000100528</b> |            | 0.15243902 |            | 0.152439024 |             |           |           |
| <b>ENSG00000089159</b> |            | 0.46060606 |            | 0.460606061 |             |           | 0.4705882 |
| <b>ENSG00000186638</b> | 0.3373494  | 0.23636364 | 0.3373494  | 0.236363636 | 0.380952381 | 0.3023256 | 0.0523256 |
| <b>ENSG00000131116</b> | 0.23353293 |            | 0.23353293 |             | 0.265060241 | 0.2559524 |           |
| <b>ENSG00000188763</b> |            | 0.18484848 |            | 0.184848485 |             |           | 0.122093  |
| <b>ENSG00000166148</b> | 0.20481928 |            | 0.20481928 |             |             |           |           |
| <b>ENSG00000055208</b> | 0.07185629 | 0.21111111 | 0.07185629 | 0.211111111 |             |           | 0.5       |
| <b>ENSG00000177238</b> | 0.0748503  |            | 0.0748503  |             |             |           |           |
| <b>ENSG00000166986</b> |            | 0.17575758 |            | 0.175757576 |             |           | 0.1058824 |
| <b>ENSG00000120071</b> |            | 0.21036585 |            | 0.210365854 | 0.488888889 | 0.4883721 |           |
| <b>ENSG00000178605</b> |            | 0.34567901 |            | 0.345679012 |             |           | 0.4940476 |
| <b>ENSG00000147439</b> |            | 0.32424242 |            | 0.324242424 |             |           | 0.2325581 |
| <b>ENSG00000157578</b> | 0.39820359 |            | 0.39820359 |             | 0.255952381 | 0.372093  |           |
| <b>ENSG00000172164</b> |            | 0.38888889 |            | 0.388888889 |             |           | 0.4534884 |
| <b>ENSG00000198910</b> | 0.17045455 |            | 0.17045455 |             | 0.066666667 | 0.0681818 |           |
| <b>ENSG00000189269</b> | 0.13333333 | 0.38181818 | 0.13333333 | 0.381818182 | 0.311111111 | 0.3522727 | 0.0813953 |
| <b>ENSG00000172936</b> |            | 0.14545455 |            | 0.145454545 |             |           | 0.2848837 |
| <b>ENSG00000006576</b> |            | 0.14848485 |            | 0.148484848 | 0.130952381 | 0.2151163 | 0.1058824 |
| <b>ENSG00000182070</b> |            | 0.42424242 |            | 0.424242424 |             |           | 0.4352941 |
| <b>ENSG00000132763</b> |            | 0.46551724 |            | 0.465517241 |             |           | 0.3295455 |
| <b>ENSG00000170162</b> |            | 0.14242424 |            | 0.142424242 |             |           | 0.0823529 |
| <b>ENSG00000131142</b> |            | 0.06969697 |            | 0.06969697  |             |           | 0.0988372 |
| <b>ENSG00000077942</b> | 0.28143713 | 0.43939394 | 0.28143713 | 0.439393939 | 0.476190476 | 0.3470588 | 0.4418605 |

|                 |            |            |            |             |             |           |           |
|-----------------|------------|------------|------------|-------------|-------------|-----------|-----------|
| ENSG00000255152 |            | 0.13939394 |            | 0.139393939 |             |           | 0.2674419 |
| ENSG00000196569 | 0.08950617 | 0.25903614 | 0.08950617 | 0.259036145 |             |           | 0.1823529 |
| ENSG00000136383 |            | 0.29393939 |            | 0.293939394 |             |           | 0.4090909 |
| ENSG00000162735 |            | 0.44444444 |            | 0.444444444 | 0.055555556 |           | 0.3522727 |
| ENSG00000141068 |            | 0.47256098 |            | 0.472560976 |             |           | 0.3705882 |
| ENSG00000078687 |            | 0.06666667 |            | 0.066666667 |             |           | 0.1547619 |
| ENSG00000142606 |            | 0.35757576 |            | 0.357575758 |             |           | 0.3488372 |
| ENSG00000170271 |            | 0.11818182 |            | 0.118181818 |             |           | 0.1046512 |
| ENSG00000170860 | 0.39655172 | 0.48787879 | 0.39655172 | 0.487878788 | 0.244444444 | 0.1818182 | 0.4418605 |
| ENSG00000096060 |            | 0.23636364 |            | 0.236363636 |             |           | 0.1627907 |
| ENSG00000138376 | 0.17222222 | 0.41666667 | 0.17222222 | 0.416666667 | 0.366666667 | 0.3111111 | 0.4302326 |
| ENSG00000149313 |            |            |            |             |             |           | 0.375     |
| ENSG00000183250 |            | 0.38787879 |            | 0.387878788 |             |           | 0.3255814 |
| ENSG00000120832 | 0.43678161 | 0.46969697 | 0.43678161 | 0.46969697  | 0.340909091 | 0.2325581 | 0.3255814 |
| ENSG00000144445 |            | 0.45121951 |            | 0.451219512 |             |           | 0.5       |
| ENSG00000175582 |            | 0.45505618 |            | 0.45505618  |             |           | 0.4222222 |
| ENSG00000131061 | 0.07784431 | 0.05487805 | 0.07784431 | 0.054878049 |             |           | 0.0639535 |
| ENSG00000133020 | 0.18975904 |            | 0.18975904 |             | 0.196428571 | 0.1882353 |           |
| ENSG00000125952 |            | 0.37878788 |            | 0.378787879 |             |           | 0.4418605 |
| ENSG00000152439 | 0.165625   | 0.31097561 | 0.165625   | 0.31097561  | 0.339506173 | 0.4709302 | 0.375     |
| ENSG00000070526 |            | 0.48484848 |            | 0.484848485 |             |           | 0.1764706 |
| ENSG00000113272 | 0.33233533 | 0.39130435 | 0.33233533 | 0.391304348 | 0.380952381 | 0.4709302 | 0.4882353 |
| ENSG00000120280 |            | 0.22560976 |            | 0.225609756 |             |           |           |
| ENSG00000189339 |            |            |            |             |             |           | 0.4823529 |
| ENSG00000138606 | 0.46407186 | 0.14242424 | 0.46407186 | 0.142424242 |             |           | 0.2790698 |
| ENSG00000154102 |            | 0.22222222 |            | 0.222222222 |             |           | 0.2613636 |
| ENSG00000121903 |            | 0.25609756 |            | 0.256097561 |             |           | 0.2289157 |
| ENSG00000182185 |            | 0.34545455 |            | 0.345454545 |             |           | 0.494186  |
| ENSG00000085433 |            | 0.23636364 |            | 0.236363636 |             |           | 0.3372093 |
| ENSG00000184814 | 0.08383234 |            | 0.08383234 |             |             | 0.1058824 |           |
| ENSG00000144063 | 0.17073171 | 0.15517241 | 0.17073171 | 0.155172414 |             |           | 0.1395349 |
| ENSG00000089280 | 0.25       |            | 0.25       |             | 0.148809524 | 0.2325581 |           |
| ENSG00000135549 | 0.41317365 | 0.45151515 | 0.41317365 | 0.451515152 | 0.363095238 | 0.4823529 | 0.2916667 |
| ENSG00000197296 |            | 0.23636364 |            | 0.236363636 |             |           | 0.4244186 |
| ENSG00000102921 |            | 0.33333333 |            | 0.333333333 |             |           | 0.2906977 |
| ENSG00000184162 |            |            |            |             |             |           | 0.1477273 |
| ENSG00000170265 |            | 0.1        |            | 0.1         |             |           |           |
| ENSG00000214510 | 0.15555556 |            | 0.15555556 |             |             |           |           |
| ENSG00000176108 |            | 0.40229885 |            | 0.402298851 |             |           | 0.4534884 |
| ENSG00000078399 |            | 0.38181818 |            | 0.381818182 |             |           | 0.2848837 |
| ENSG00000112309 | 0.22155689 | 0.48181818 | 0.22155689 | 0.481818182 | 0.267857143 | 0.3023256 | 0.4360465 |
| ENSG00000163909 |            | 0.41515152 |            | 0.415151515 |             |           | 0.3372093 |
| ENSG00000205853 | 0.0748503  | 0.07575758 | 0.0748503  | 0.075757576 | 0.18452381  | 0.1569767 |           |
| ENSG00000047634 | 0.4126506  |            | 0.4126506  |             |             |           |           |
| ENSG00000106080 |            | 0.16666667 |            | 0.166666667 |             |           | 0.0853659 |
| ENSG00000092108 | 0.16766467 |            | 0.16766467 |             | 0.317073171 | 0.3192771 |           |
| ENSG00000255302 |            | 0.12727273 |            | 0.127272727 |             |           | 0.2848837 |
| ENSG00000243955 | 0.32335329 |            | 0.32335329 |             | 0.095238095 | 0.127907  |           |
| ENSG00000105989 |            | 0.44545455 |            | 0.445454545 |             |           | 0.4090909 |
| ENSG00000215440 |            | 0.40909091 |            | 0.409090909 |             |           | 0.4709302 |
| ENSG00000072864 |            | 0.43939394 |            | 0.439393939 |             |           | 0.4470588 |
| ENSG00000165060 |            | 0.48888889 |            | 0.488888889 |             |           | 0.4882353 |
| ENSG00000137310 | 0.37724551 | 0.47272727 | 0.37724551 | 0.472727273 | 0.470238095 | 0.5       | 0.5       |
| ENSG00000088205 |            | 0.22981366 |            | 0.229813665 |             |           | 0.3255814 |

|                |            |            |            |             |             |           |           |
|----------------|------------|------------|------------|-------------|-------------|-----------|-----------|
| ENSG0000077147 |            | 0.45757576 |            | 0.45757578  |             |           | 0.4767442 |
| ENSG0000140525 | 0.16467066 | 0.36060606 | 0.16467066 | 0.360606061 | 0.285714286 | 0.2848837 | 0.377907  |
| ENSG0000142544 |            | 0.4969697  |            | 0.496969697 |             |           | 0.1976744 |
| ENSG0000154328 |            | 0.38819876 |            | 0.388198758 | 0.159090909 | 0.1842105 | 0.2529412 |
| ENSG0000170579 | 0.1741573  | 0.35757576 | 0.1741573  | 0.357575758 | 0.303571429 | 0.2267442 | 0.4825581 |
| ENSG0000153283 | 0.17065868 | 0.23030303 | 0.17065868 | 0.23030303  | 0.464285714 | 0.4593023 | 0.1845238 |
| ENSG0000189068 |            | 0.42682927 |            | 0.426829268 |             |           | 0.2848837 |
| ENSG0000168229 |            | 0.28353659 |            | 0.283536585 |             |           | 0.2383721 |
| ENSG0000189369 | 0.3        |            | 0.3        |             | 0.077777778 | 0.1022727 |           |
| ENSG0000197846 |            | 0.26136364 |            | 0.261363636 |             |           | 0.1818182 |
| ENSG0000141682 |            | 0.16257669 |            | 0.162576687 |             |           | 0.2267442 |
| ENSG0000140332 |            | 0.42352941 |            | 0.423529412 |             |           | 0.3139535 |
| ENSG0000152592 |            | 0.28888889 |            | 0.288888889 |             |           | 0.1818182 |
| ENSG0000065328 |            | 0.17878788 |            | 0.178787879 |             |           | 0.2674419 |
| ENSG0000181378 | 0.48203593 | 0.12121212 | 0.48203593 | 0.121212121 | 0.446428571 | 0.4418605 | 0.2093023 |
| ENSG0000097007 |            | 0.48170732 |            | 0.481707317 |             |           | 0.4705882 |
| ENSG0000032444 | 0.20658683 |            | 0.20658683 |             | 0.488095238 | 0.4593023 |           |
| ENSG0000174500 |            | 0.28220859 |            | 0.282208589 |             |           |           |
| ENSG0000048140 |            | 0.26969697 |            | 0.26969697  |             |           | 0.5       |
| ENSG0000138798 | 0.08083832 | 0.07878788 | 0.08083832 | 0.078787879 |             |           | 0.2151163 |
| ENSG0000163645 | 0.26047904 |            | 0.26047904 |             |             |           |           |
| ENSG0000136051 |            | 0.2        |            | 0.2         | 0.058139535 | 0.1       | 0.2325581 |
| ENSG0000182670 | 0.31437126 | 0.46363636 | 0.31437126 | 0.463636364 | 0.327380952 | 0.4204545 | 0.3895349 |
| ENSG0000197056 | 0.30538922 |            | 0.30538922 |             | 0.238095238 | 0.2529412 |           |
| ENSG0000150628 | 0.41017964 |            | 0.41017964 |             | 0.386904762 | 0.3488372 |           |
| ENSG0000065833 |            |            |            |             |             |           | 0.0609756 |
| ENSG0000120333 |            | 0.23809524 |            | 0.238095238 |             |           | 0.3081395 |
| ENSG0000166311 |            | 0.22121212 |            | 0.221212121 |             |           | 0.1744186 |
| ENSG0000143162 |            | 0.18484848 |            | 0.184848485 |             |           | 0.2267442 |
| ENSG0000176635 | 0.13772455 |            | 0.13772455 |             |             |           | 0.1162791 |
| ENSG0000079785 | 0.13173653 |            | 0.13173653 |             | 0.154761905 | 0.0639535 |           |
| ENSG0000075043 |            | 0.45151515 |            | 0.451515152 |             |           |           |
| ENSG0000173726 |            | 0.29268293 |            | 0.292682927 |             |           | 0.4529412 |
| ENSG0000140955 |            | 0.09302326 |            | 0.093023256 |             |           | 0.0769231 |
| ENSG0000137731 | 0.15269461 | 0.33030303 | 0.15269461 | 0.33030303  | 0.297619048 | 0.2235294 | 0.25      |
| ENSG0000133488 | 0.23312883 | 0.24848485 | 0.23312883 | 0.248484848 |             |           | 0.0872093 |
| ENSG0000181061 |            | 0.26666667 |            | 0.266666667 |             |           | 0.1569767 |
| ENSG0000174796 |            | 0.43103448 |            | 0.431034483 |             |           | 0.4886364 |
| ENSG0000157833 |            | 0.20606061 |            | 0.206060606 | 0.208333333 | 0.1860465 | 0.1104651 |
| ENSG0000160716 |            | 0.2195122  |            | 0.219512195 |             |           | 0.2588235 |
| ENSG0000168216 | 0.19461078 | 0.46666667 | 0.19461078 | 0.466666667 | 0.419753086 | 0.4166667 | 0.4       |
| ENSG0000119973 |            | 0.13939394 |            | 0.139393939 |             |           |           |
| ENSG0000243772 | 0.07954545 | 0.13888889 | 0.07954545 | 0.138888889 |             |           |           |
| ENSG0000136937 | 0.39520958 | 0.36666667 | 0.39520958 | 0.366666667 | 0.113095238 | 0.0872093 | 0.0555556 |
| ENSG0000254827 | 0.39820359 |            | 0.39820359 |             | 0.297619048 | 0.3081395 |           |
| ENSG0000059573 |            | 0.48181818 |            | 0.481818182 |             |           | 0.0523256 |
| ENSG0000168538 |            | 0.1969697  |            | 0.196969697 |             |           | 0.1860465 |
| ENSG0000048162 |            | 0.10606061 |            | 0.106060606 |             |           |           |
| ENSG0000004948 | 0.46604938 | 0.28527607 | 0.46604938 | 0.285276074 | 0.295180723 | 0.3231707 | 0.4647059 |
| ENSG0000137154 | 0.18562874 | 0.08787879 | 0.18562874 | 0.087878788 |             |           |           |
| ENSG0000235478 |            | 0.05       |            | 0.05        |             |           | 0.4772727 |
| ENSG0000168995 |            | 0.05172414 |            | 0.051724138 |             |           | 0.4204545 |
| ENSG0000184924 |            | 0.44785276 |            | 0.447852761 |             |           | 0.4529412 |
| ENSG0000145860 | 0.29341317 | 0.16666667 | 0.29341317 | 0.166666667 | 0.333333333 | 0.4705882 | 0.0588235 |

|                 |            |            |            |             |             |           |           |
|-----------------|------------|------------|------------|-------------|-------------|-----------|-----------|
| ENSG00000136143 |            | 0.16049383 |            | 0.160493827 |             |           |           |
| ENSG0000041802  |            | 0.45555556 |            | 0.455555556 |             |           | 0.4777778 |
| ENSG00000164430 |            | 0.30357143 |            | 0.303571429 |             |           | 0.1818182 |
| ENSG00000111339 |            | 0.47239264 |            | 0.472392638 |             |           | 0.3333333 |
| ENSG00000136842 |            |            |            |             |             |           | 0.0568182 |
| ENSG00000147408 | 0.47005988 | 0.31212121 | 0.47005988 | 0.312121212 | 0.422619048 | 0.4534884 |           |
| ENSG00000123444 |            |            |            |             | 0.25        | 0.2325581 |           |
| ENSG00000105492 | 0.43181818 |            | 0.43181818 |             | 0.433333333 | 0.4886364 |           |
| ENSG00000050405 | 0.33030303 | 0.45757576 | 0.33030303 | 0.457575758 | 0.285714286 | 0.244186  | 0.2613636 |
| ENSG00000188706 |            | 0.12424242 |            | 0.124242424 |             |           | 0.4534884 |
| ENSG00000111596 | 0.47305389 | 0.34567901 | 0.47305389 | 0.345679012 | 0.488095238 | 0.4302326 | 0.4302326 |
| ENSG00000101333 |            | 0.05151515 |            | 0.051515152 |             |           | 0.2674419 |
| ENSG00000166347 |            |            |            |             |             |           | 0.0588235 |
| ENSG00000182704 |            | 0.12121212 |            | 0.121212121 |             |           |           |
| ENSG00000167785 | 0.15       | 0.33939394 | 0.15       | 0.339393939 | 0.421686747 | 0.3255814 | 0.4767442 |
| ENSG00000243509 |            |            |            |             | 0.444444444 | 0.4204545 |           |
| ENSG00000179520 | 0.15568862 | 0.41573034 | 0.15568862 | 0.415730337 |             |           | 0.25      |
| ENSG00000011275 | 0.125      | 0.05151515 | 0.125      | 0.051515152 | 0.220238095 | 0.2151163 | 0.1162791 |
| ENSG00000113638 |            | 0.29938272 |            | 0.299382716 |             |           |           |
| ENSG00000216588 |            | 0.22560976 |            | 0.225609756 |             |           | 0.0872093 |
| ENSG00000143418 |            | 0.35454545 |            | 0.354545455 |             |           | 0.4825581 |
| ENSG00000130827 |            | 0.14242424 |            | 0.142424242 |             |           | 0.0882353 |
| ENSG00000164821 | 0.46385542 | 0.26969697 | 0.46385542 | 0.26969697  | 0.214285714 | 0.1918605 | 0.3837209 |
| ENSG00000152254 |            | 0.38181818 |            | 0.381818182 |             |           | 0.4090909 |
| ENSG00000214026 |            | 0.15853659 |            | 0.158536585 |             |           | 0.1309524 |
| ENSG00000155657 | 0.06024096 | 0.06666667 | 0.06024096 | 0.066666667 |             |           | 0.1477273 |
| ENSG00000067191 |            | 0.20555556 |            | 0.205555556 |             |           | 0.1395349 |
| ENSG00000197959 | 0.23192771 | 0.42121212 | 0.23192771 | 0.421212121 | 0.291666667 | 0.3023256 | 0.5       |
| ENSG00000010671 |            | 0.42727273 |            | 0.427272727 |             |           | 0.4302326 |
| ENSG00000010219 |            | 0.42727273 |            | 0.427272727 |             |           | 0.2117647 |
| ENSG00000125851 | 0.11676647 | 0.15757576 | 0.11676647 | 0.157575758 | 0.148809524 | 0.2764706 | 0.127907  |
| ENSG00000257127 |            | 0.49079755 |            | 0.490797546 | 0.156626506 | 0.1569767 | 0.4360465 |
| ENSG00000006062 |            | 0.46969697 |            | 0.46969697  |             |           | 0.3953488 |
| ENSG00000118246 | 0.2994012  | 0.22392638 | 0.2994012  | 0.22392638  |             | 0.0581395 | 0.2891566 |
| ENSG00000108639 |            | 0.26060606 |            | 0.260606061 |             |           | 0.1511628 |
| ENSG00000153179 |            | 0.465625   |            | 0.465625    |             |           | 0.3023256 |
| ENSG00000139352 | 0.44879518 | 0.23101266 | 0.44879518 | 0.231012658 | 0.154761905 | 0.0581395 | 0.1219512 |
| ENSG00000083799 |            | 0.07303371 |            | 0.073033708 |             |           |           |
| ENSG00000164694 |            | 0.14848485 |            | 0.148484848 |             |           |           |
| ENSG00000103160 |            | 0.46666667 |            | 0.466666667 |             |           | 0.3058824 |
| ENSG00000131386 |            | 0.13636364 |            | 0.136363636 |             |           | 0.0872093 |
| ENSG00000125965 |            |            |            |             | 0.238095238 | 0.25      |           |
| ENSG00000139269 | 0.1497006  | 0.26060606 | 0.1497006  | 0.260606061 | 0.311111111 | 0.4418605 | 0.3372093 |
| ENSG00000188428 | 0.35329341 | 0.2791411  | 0.35329341 | 0.279141104 | 0.06547619  | 0.0523256 | 0.2209302 |
| ENSG00000142207 |            | 0.26060606 |            | 0.260606061 |             |           | 0.4593023 |
| ENSG00000184831 | 0.21910112 | 0.27878788 | 0.21910112 | 0.278787879 | 0.455555556 | 0.3068182 | 0.3372093 |
| ENSG00000161574 | 0.35955056 | 0.20909091 | 0.35955056 | 0.209090909 |             | 0.0795455 | 0.4709302 |
| ENSG00000198208 | 0.41566265 | 0.43333333 | 0.41566265 | 0.433333333 | 0.428571429 | 0.4593023 | 0.4886364 |
| ENSG00000196235 | 0.14371257 |            | 0.14371257 |             | 0.493975904 | 0.4647059 |           |
| ENSG00000146112 | 0.12777778 |            | 0.12777778 |             | 0.355555556 | 0.3068182 | 0.1744186 |
| ENSG00000092758 |            | 0.29393939 |            | 0.293939394 |             |           | 0.1046512 |
| ENSG00000180332 | 0.21856287 |            | 0.21856287 |             |             |           |           |
| ENSG00000088682 |            | 0.08484848 |            | 0.084848485 |             |           |           |
| ENSG00000130477 |            | 0.28181818 |            | 0.281818182 |             |           | 0.0930233 |



|                |            |            |            |             |             |           |           |
|----------------|------------|------------|------------|-------------|-------------|-----------|-----------|
| ENSG0000090020 | 0.26506024 | 0.35454545 | 0.26506024 | 0.354545455 | 0.077380952 | 0.1104651 | 0.122093  |
| ENSG0000101158 |            | 0.47272727 |            | 0.472727273 |             |           | 0.4127907 |
| ENSG0000105855 | 0.134375   |            | 0.134375   |             | 0.44375     | 0.373494  |           |
| ENSG0000187997 |            | 0.43636364 |            | 0.436363636 |             |           | 0.3023256 |
| ENSG0000138495 |            | 0.4        |            | 0.4         |             |           | 0.3235294 |
| ENSG0000169385 |            |            |            |             |             |           | 0.0639535 |
| ENSG0000174123 | 0.43712575 |            | 0.43712575 |             | 0.446428571 | 0.4767442 | 0.1176471 |
| ENSG0000119820 |            | 0.14242424 |            | 0.142424242 |             |           |           |
| ENSG0000174564 |            | 0.36060606 |            | 0.360606061 |             |           | 0.1511628 |
| ENSG0000176903 |            | 0.35151515 |            | 0.351515152 |             |           | 0.1395349 |
| ENSG0000105866 |            | 0.33030303 |            | 0.33030303  |             |           | 0.2209302 |
| ENSG0000056586 | 0.46111111 | 0.49393939 | 0.46111111 | 0.493939394 | 0.266666667 | 0.2159091 | 0.25      |
| ENSG0000172243 |            | 0.16666667 |            | 0.166666667 | 0.291666667 | 0.4069767 | 0.2965116 |
| ENSG0000187189 | 0.05555556 | 0.46067416 | 0.05555556 | 0.460674157 |             |           | 0.377907  |
| ENSG0000112167 |            | 0.34545455 |            | 0.34545455  |             |           | 0.2732558 |
| ENSG0000138231 |            | 0.31764706 |            | 0.317647059 | 0.053571429 |           | 0.4651163 |
| ENSG0000039068 |            | 0.22121212 |            | 0.221212121 |             |           | 0.127907  |
| ENSG0000140479 |            | 0.49695122 |            | 0.49695122  |             |           | 0.3488372 |
| ENSG0000114346 |            | 0.40606061 |            | 0.406060606 |             |           | 0.3023256 |
| ENSG0000153487 | 0.41477273 |            | 0.41477273 |             | 0.188888889 | 0.1818182 |           |
| ENSG0000174327 | 0.21666667 |            | 0.21666667 |             | 0.244444444 | 0.1818182 |           |
| ENSG0000116752 |            | 0.48181818 |            | 0.481818182 |             |           | 0.377907  |
| ENSG0000166257 |            | 0.47546012 |            | 0.475460123 | 0.166666667 | 0.0813953 | 0.4651163 |
| ENSG0000082175 | 0.3502994  | 0.3        | 0.3502994  | 0.3         |             |           | 0.4888889 |
| ENSG0000074771 |            | 0.12921348 |            | 0.129213483 |             |           | 0.2444444 |
| ENSG0000148482 |            | 0.275      |            | 0.275       |             |           | 0.2764706 |
| ENSG0000175161 |            | 0.37777778 |            | 0.377777778 |             |           | 0.1704545 |
| ENSG0000167280 |            | 0.37575758 |            | 0.375757576 |             |           | 0.3235294 |
| ENSG0000006071 |            | 0.36585366 |            | 0.365853659 |             |           | 0.3953488 |
| ENSG0000198369 |            | 0.45151515 |            | 0.451515152 |             |           | 0.2151163 |
| ENSG0000171303 |            | 0.46111111 |            | 0.461111111 |             |           | 0.2848837 |
| ENSG0000166473 |            | 0.45151515 |            | 0.451515152 |             |           | 0.4244186 |
| ENSG0000135241 | 0.09659091 | 0.33030303 | 0.09659091 | 0.33030303  |             | 0.125     | 0.1337209 |
| ENSG0000169592 |            | 0.48787879 |            | 0.487878788 |             |           | 0.3023256 |
| ENSG0000113649 |            | 0.10909091 |            | 0.109090909 |             |           | 0.3255814 |
| ENSG0000099810 |            | 0.41818182 |            | 0.418181818 |             |           | 0.494186  |
| ENSG0000161609 | 0.41916168 | 0.25454545 | 0.41916168 | 0.254545455 | 0.445783133 | 0.4588235 | 0.1744186 |
| ENSG0000053770 | 0.0988024  |            | 0.0988024  |             | 0.05952381  |           |           |
| ENSG0000112234 | 0.08385093 |            | 0.08385093 |             | 0.222891566 | 0.2891566 |           |
| ENSG0000178741 |            | 0.41212121 |            | 0.412121212 |             |           | 0.2151163 |
| ENSG0000107560 | 0.08682635 | 0.33231707 | 0.08682635 | 0.332317073 | 0.488095238 | 0.4418605 | 0.2727273 |
| ENSG0000178852 | 0.22754491 |            | 0.22754491 |             | 0.208333333 | 0.2151163 |           |
| ENSG0000168461 |            | 0.49079755 |            | 0.490797546 |             |           | 0.4647059 |
| ENSG0000243696 |            | 0.36969697 |            | 0.36969697  |             |           | 0.3888889 |
| ENSG0000120694 | 0.27245509 |            | 0.27245509 |             | 0.363095238 | 0.2965116 |           |
| ENSG0000197748 |            | 0.05952381 |            | 0.05952381  |             |           | 0.2333333 |
| ENSG0000166006 | 0.24698795 | 0.41011236 | 0.24698795 | 0.41011236  |             |           | 0.4555556 |
| ENSG0000162733 | 0.29640719 | 0.06060606 | 0.29640719 | 0.060606061 |             | 0.1395349 |           |
| ENSG0000137841 |            | 0.05757576 |            | 0.057575758 |             |           | 0.0930233 |
| ENSG0000061455 |            |            |            |             |             |           | 0.1444444 |
| ENSG0000107745 |            | 0.35757576 |            | 0.357575758 |             |           | 0.1746988 |
| ENSG0000153208 | 0.18975904 | 0.35151515 | 0.18975904 | 0.351515152 | 0.125       | 0.1104651 | 0.2151163 |
| ENSG0000162004 | 0.36196319 | 0.4969697  | 0.36196319 | 0.496969697 | 0.201219512 | 0.2073171 | 0.2209302 |
| ENSG0000197619 |            | 0.27743902 |            | 0.277439024 | 0.333333333 | 0.3430233 | 0.3863636 |

|                 |            |            |            |             |             |           |           |
|-----------------|------------|------------|------------|-------------|-------------|-----------|-----------|
| ENSG0000058866  | 0.43975904 | 0.5        | 0.43975904 | 0.5         |             | 0.0523256 | 0.3409091 |
| ENSG00000152766 |            |            |            |             |             |           | 0.1162791 |
| ENSG00000162298 |            | 0.06329114 |            | 0.063291139 |             |           |           |
| ENSG00000175564 | 0.0988024  | 0.49444444 | 0.0988024  | 0.49444444  | 0.327380952 | 0.2848837 | 0.4555556 |
| ENSG00000144821 |            | 0.48787879 |            | 0.487878788 |             |           |           |
| ENSG00000100591 | 0.41916168 | 0.49393939 | 0.41916168 | 0.493939394 | 0.090361446 | 0.0755814 | 0.0755814 |
| ENSG00000134668 | 0.31736527 | 0.24848485 | 0.31736527 | 0.248484848 | 0.477777778 | 0.3313953 | 0.4534884 |
| ENSG00000119715 |            | 0.24848485 |            | 0.248484848 |             |           | 0.2209302 |
| ENSG00000152670 | 0.31927711 |            | 0.31927711 |             | 0.321428571 | 0.3546512 |           |
| ENSG00000258947 | 0.37078652 | 0.07878788 | 0.37078652 | 0.078787879 | 0.375       | 0.244186  | 0.127907  |
| ENSG00000138068 | 0.27409639 |            | 0.27409639 |             |             |           |           |
| ENSG00000185736 | 0.14670659 | 0.34756098 | 0.14670659 | 0.347560976 | 0.392857143 | 0.3953488 | 0.2965116 |
| ENSG00000243789 |            | 0.48295455 |            | 0.482954545 |             |           | 0.2555556 |
| ENSG00000182264 | 0.28443114 |            | 0.28443114 |             | 0.19047619  | 0.1511628 |           |
| ENSG00000114388 | 0.18862275 |            | 0.18862275 |             | 0.375       | 0.4825581 |           |
| ENSG00000141441 |            | 0.27272727 |            | 0.272727273 |             |           | 0.1860465 |
| ENSG00000163596 |            | 0.31595092 |            | 0.31595092  |             |           | 0.1395349 |
| ENSG00000132677 |            | 0.4969697  |            | 0.496969697 |             |           | 0.4222222 |
| ENSG00000105641 |            | 0.17878788 |            | 0.178787879 |             |           | 0.0523256 |
| ENSG00000112343 | 0.47305389 |            | 0.47305389 |             | 0.077380952 | 0.0639535 |           |
| ENSG00000158055 | 0.43113772 | 0.3030303  | 0.43113772 | 0.303030303 | 0.220238095 | 0.122093  | 0.4244186 |
| ENSG00000189051 |            | 0.22121212 |            | 0.221212121 |             |           | 0.1764706 |
| ENSG00000221845 |            | 0.23939394 |            | 0.239393939 |             |           | 0.3604651 |
| ENSG00000140274 |            | 0.07272727 |            | 0.072727273 |             |           | 0.1477273 |
| ENSG00000010030 | 0.26347305 |            | 0.26347305 |             | 0.303571429 | 0.3604651 |           |
| ENSG00000116205 |            | 0.41818182 |            | 0.418181818 |             |           | 0.3837209 |
| ENSG00000158321 | 0.25609756 |            | 0.25609756 |             | 0.148809524 |           | 0.0568182 |
| ENSG00000188910 |            | 0.14545455 |            | 0.145454545 |             |           | 0.3313953 |
| ENSG00000198765 |            | 0.42222222 |            | 0.422222222 |             |           | 0.4705882 |
| ENSG00000172007 |            | 0.29447853 |            | 0.294478528 |             |           | 0.1       |
| ENSG00000151665 |            | 0.26851852 |            | 0.268518519 |             |           | 0.1036585 |
| ENSG00000187021 |            | 0.32386364 |            | 0.323863636 |             |           | 0.3636364 |
| ENSG00000149115 |            | 0.34848485 |            | 0.348484848 |             |           | 0.3953488 |
| ENSG00000159251 | 0.05988024 | 0.34545455 | 0.05988024 | 0.345454545 |             |           | 0.4939024 |
| ENSG00000205364 |            |            |            |             |             |           | 0.0581395 |
| ENSG00000141258 |            | 0.28787879 |            | 0.287878788 |             |           | 0.1744186 |
| ENSG00000115109 |            | 0.26363636 |            | 0.263636364 | 0.372093023 | 0.3488372 | 0.3546512 |
| ENSG00000188846 | 0.23053892 | 0.22424242 | 0.23053892 | 0.224242424 | 0.5         | 0.4651163 | 0.4186047 |
| ENSG00000140718 | 0.07185629 | 0.46022727 | 0.07185629 | 0.460227273 |             |           | 0.4941176 |
| ENSG00000144320 |            | 0.48780488 |            | 0.487804878 |             |           | 0.3764706 |
| ENSG00000100372 |            | 0.3030303  |            | 0.303030303 | 0.35        | 0.327381  | 0.3235294 |
| ENSG00000177143 |            | 0.2030303  |            | 0.203030303 |             |           | 0.0639535 |
| ENSG00000174156 | 0.16766467 |            | 0.16766467 |             |             |           |           |
| ENSG00000140264 | 0.31736527 | 0.07222222 | 0.31736527 | 0.072222222 |             |           | 0.244186  |
| ENSG00000132182 |            | 0.48159509 |            | 0.481595092 |             |           | 0.4107143 |
| ENSG00000116117 |            | 0.4494382  |            | 0.449438202 |             |           | 0.4583333 |
| ENSG00000146555 | 0.38855422 | 0.475      | 0.38855422 | 0.475       | 0.220238095 | 0.2383721 | 0.3953488 |
| ENSG00000181638 | 0.24444444 | 0.459375   | 0.24444444 | 0.459375    | 0.307228916 | 0.2906977 | 0.2954545 |
| ENSG00000105875 |            | 0.26666667 |            | 0.266666667 |             |           | 0.1511628 |
| ENSG00000170113 | 0.45808383 | 0.4969697  | 0.45808383 | 0.496969697 | 0.410714286 | 0.4767442 | 0.4767442 |
| ENSG00000089123 |            | 0.17777778 |            | 0.177777778 |             |           | 0.2840909 |
| ENSG00000163577 |            | 0.34146341 |            | 0.341463415 |             |           | 0.3546512 |
| ENSG00000172348 | 0.36445783 | 0.13939394 | 0.36445783 | 0.139393939 | 0.297619048 | 0.2764706 | 0.1569767 |
| ENSG00000147614 |            | 0.2969697  |            | 0.296969697 |             |           | 0.1627907 |

|                 |            |            |            |             |             |           |           |
|-----------------|------------|------------|------------|-------------|-------------|-----------|-----------|
| ENSG00000230301 | 0.3502994  |            | 0.3502994  |             | 0.494047619 |           | 0.3313953 |
| ENSG00000171262 |            | 0.32424242 |            | 0.324242424 |             |           | 0.2588235 |
| ENSG00000204070 |            | 0.4202454  |            | 0.420245399 |             |           | 0.4011628 |
| ENSG00000124256 |            | 0.36890244 |            | 0.368902439 |             |           | 0.4825581 |
| ENSG00000070501 |            |            |            |             | 0.113095238 |           | 0.1823529 |
| ENSG00000177679 |            |            |            |             |             |           | 0.1941176 |
| ENSG00000154743 | 0.10909091 | 0.48170732 | 0.10909091 | 0.481707317 |             |           | 0.1823529 |
| ENSG00000122882 |            | 0.06097561 |            | 0.06097561  |             |           | 0.2888889 |
| ENSG00000130589 | 0.36144578 | 0.3        | 0.36144578 | 0.3         | 0.4         | 0.4090909 | 0.3313953 |
| ENSG00000164292 |            | 0.42682927 |            | 0.426829268 |             |           | 0.2738095 |
| ENSG00000183778 |            | 0.41212121 |            | 0.412121212 |             |           | 0.4767442 |
| ENSG00000095303 | 0.31736527 | 0.17878788 | 0.31736527 | 0.178787879 | 0.078313253 | 0.0755814 | 0.0639535 |
| ENSG00000123243 | 0.36826347 | 0.23295455 | 0.36826347 | 0.232954545 | 0.463855422 | 0.4825581 | 0.1647059 |
| ENSG00000188112 |            | 0.15151515 |            | 0.151515152 |             |           | 0.3023256 |
| ENSG00000120093 | 0.47005988 |            | 0.47005988 |             | 0.178571429 | 0.1588235 |           |
| ENSG00000147852 |            | 0.24444444 |            | 0.244444444 |             |           |           |
| ENSG00000213337 |            |            |            |             |             |           | 0.0681818 |
| ENSG00000166402 |            | 0.37777778 |            | 0.37777778  |             |           | 0.494186  |
| ENSG00000225940 | 0.26363636 |            | 0.26363636 |             | 0.148809524 | 0.1860465 |           |
| ENSG00000175938 |            | 0.10509554 |            | 0.105095541 |             |           |           |
| ENSG00000121440 |            | 0.47878788 |            | 0.478787879 |             |           | 0.2267442 |
| ENSG00000118816 |            | 0.05617978 |            | 0.056179775 |             |           | 0.1704545 |
| ENSG00000196642 | 0.4126506  |            | 0.4126506  |             | 0.172619048 | 0.125     |           |
| ENSG00000074047 | 0.39197531 | 0.29393939 | 0.39197531 | 0.293939394 |             |           | 0.4476744 |
| ENSG00000250571 |            | 0.46969697 |            | 0.46969697  |             |           | 0.2954545 |
| ENSG00000107902 |            | 0.05151515 |            | 0.051515152 |             |           | 0.127907  |
| ENSG00000256045 |            | 0.40909091 |            | 0.409090909 |             |           | 0.2906977 |
| ENSG00000170703 |            | 0.35454545 |            | 0.354545455 |             |           |           |
| ENSG00000081842 |            | 0.05151515 |            | 0.051515152 |             |           | 0.1162791 |
| ENSG00000198315 |            | 0.27710843 |            | 0.277108434 |             |           | 0.4186047 |
| ENSG00000140199 | 0.15340909 | 0.33544304 | 0.15340909 | 0.335443038 | 0.238636364 | 0.3863636 | 0.3658537 |
| ENSG00000162374 |            | 0.08181818 |            | 0.081818182 |             |           | 0.2790698 |
| ENSG00000250733 |            |            |            |             | 0.386904762 | 0.3546512 |           |
| ENSG00000164933 | 0.4760479  | 0.44848485 | 0.4760479  | 0.448484848 | 0.452380952 | 0.3488372 | 0.3571429 |
| ENSG00000068724 | 0.2        | 0.2347561  | 0.2        | 0.234756098 |             |           | 0.4583333 |
| ENSG00000166704 | 0.15909091 | 0.40804598 | 0.15909091 | 0.408045977 | 0.488888889 | 0.375     | 0.3430233 |
| ENSG00000102547 | 0.16467066 | 0.39506173 | 0.16467066 | 0.395061728 | 0.446428571 | 0.4176471 | 0.4777778 |
| ENSG00000132854 | 0.5        | 0.35889571 | 0.5        | 0.358895706 | 0.321428571 | 0.2267442 | 0.1744186 |
| ENSG00000161544 |            | 0.36111111 |            | 0.361111111 |             |           | 0.1931818 |
| ENSG00000091157 |            | 0.32727273 |            | 0.327272727 |             |           | 0.4886364 |
| ENSG00000143324 |            | 0.48787879 |            | 0.487878788 |             |           | 0.2831325 |
| ENSG00000077420 | 0.46111111 |            | 0.46111111 |             |             |           | 0.0639535 |
| ENSG00000103257 |            | 0.27777778 |            | 0.27777778  |             |           | 0.2727273 |
| ENSG00000121207 | 0.40718563 | 0.1030303  | 0.40718563 | 0.103030303 | 0.255952381 | 0.1395349 |           |
| ENSG00000126456 | 0.25748503 |            | 0.25748503 |             | 0.273809524 | 0.2151163 |           |
| ENSG00000187800 | 0.27777778 | 0.27134146 | 0.27777778 | 0.271341463 | 0.377777778 | 0.4204545 | 0.4534884 |
| ENSG00000065534 | 0.39634146 | 0.38787879 | 0.39634146 | 0.387878788 | 0.466666667 | 0.4555556 | 0.4772727 |
| ENSG00000186130 | 0.45783133 |            | 0.45783133 |             | 0.321428571 | 0.25      | 0.0764706 |
| ENSG00000010072 |            | 0.37341772 |            | 0.373417722 |             |           | 0.4476744 |
| ENSG00000197646 | 0.19161677 |            | 0.19161677 |             | 0.178571429 | 0.2093023 |           |
| ENSG00000126733 |            | 0.43333333 |            | 0.433333333 |             |           | 0.4883721 |
| ENSG00000036257 | 0.1626506  | 0.48484848 | 0.1626506  | 0.484848485 | 0.285714286 | 0.3488372 | 0.4127907 |
| ENSG00000182521 | 0.24444444 | 0.21348315 | 0.24444444 | 0.213483146 | 0.355555556 | 0.3863636 |           |
| ENSG00000183166 |            | 0.21666667 |            | 0.216666667 |             |           | 0.5       |

|                 |            |            |            |             |             |  |           |           |
|-----------------|------------|------------|------------|-------------|-------------|--|-----------|-----------|
| ENSG00000103275 |            | 0.31212121 |            | 0.31212121  | 0.053571429 |  | 0.0813953 | 0.1333333 |
| ENSG00000116157 |            | 0.4695122  |            | 0.469512195 |             |  |           | 0.1744186 |
| ENSG00000182492 | 0.26807229 | 0.3        | 0.26807229 | 0.3         | 0.446428571 |  | 0.4176471 | 0.2209302 |
| ENSG00000108511 |            | 0.18181818 |            | 0.181818182 |             |  |           |           |
| ENSG00000152377 | 0.36666667 | 0.47272727 | 0.36666667 | 0.472727273 |             |  |           | 0.3255814 |
| ENSG00000170465 |            | 0.40606061 |            | 0.406060606 |             |  |           | 0.1744186 |
| ENSG00000135094 |            | 0.12121212 |            | 0.121212121 |             |  |           | 0.25      |
| ENSG00000091622 |            | 0.46666667 |            | 0.466666667 |             |  |           | 0.3372093 |
| ENSG00000138433 |            | 0.26363636 |            | 0.263636364 |             |  |           | 0.2906977 |
| ENSG00000142556 | 0.37724551 | 0.22121212 | 0.37724551 | 0.221212121 | 0.178571429 |  | 0.1162791 | 0.4593023 |
| ENSG00000183495 |            |            |            |             |             |  |           | 0.1976744 |
| ENSG00000148158 |            | 0.37878788 |            | 0.378787879 |             |  |           | 0.3197674 |
| ENSG00000214022 |            | 0.26969697 |            | 0.26969697  |             |  |           | 0.3522727 |
| ENSG00000156709 |            | 0.4        |            | 0.4         |             |  |           | 0.1744186 |
| ENSG00000128951 | 0.07185629 |            | 0.07185629 |             | 0.06547619  |  |           |           |
| ENSG00000167580 |            | 0.25       |            | 0.25        |             |  |           | 0.3662791 |
| ENSG00000171595 | 0.39520958 |            | 0.39520958 |             | 0.253012048 |  | 0.1927711 |           |
| ENSG00000174038 |            | 0.22727273 |            | 0.227272727 |             |  |           | 0.4069767 |
| ENSG00000140682 |            | 0.39655172 |            | 0.396551724 |             |  |           | 0.4318182 |
| ENSG00000196460 | 0.11363636 | 0.41212121 | 0.11363636 | 0.412121212 |             |  |           | 0.4418605 |
| ENSG00000147894 | 0.18263473 | 0.47878788 | 0.18263473 | 0.478787879 | 0.089285714 |  | 0.1104651 | 0.4418605 |
| ENSG00000074071 |            | 0.13636364 |            | 0.136363636 |             |  |           | 0.3662791 |
| ENSG00000145075 | 0.34444444 |            | 0.34444444 |             | 0.422619048 |  | 0.4011628 |           |
| ENSG00000177675 |            | 0.47222222 |            | 0.472222222 |             |  |           | 0.3522727 |
| ENSG00000134326 |            | 0.20606061 |            | 0.206060606 |             |  |           | 0.122093  |
| ENSG00000182376 |            | 0.14367816 |            | 0.143678161 |             |  |           | 0.3837209 |
| ENSG00000184014 | 0.31137725 |            | 0.31137725 |             | 0.119047619 |  | 0.122093  |           |
| ENSG00000186532 |            | 0.31515152 |            | 0.315151515 |             |  |           | 0.4069767 |
| ENSG00000183570 | 0.22424242 | 0.31818182 | 0.22424242 | 0.318181818 | 0.285714286 |  | 0.372093  | 0.2034884 |
| ENSG00000138722 | 0.29192547 | 0.40804598 | 0.29192547 | 0.408045977 | 0.228915663 |  | 0.2083333 |           |
| ENSG00000011114 |            | 0.49393939 |            | 0.493939394 |             |  |           | 0.4360465 |
| ENSG00000112079 |            | 0.16666667 |            | 0.166666667 |             |  |           | 0.4418605 |
| ENSG00000133710 |            | 0.5        |            | 0.5         |             |  |           | 0.4825581 |
| ENSG00000149451 |            | 0.44827586 |            | 0.448275862 |             |  |           | 0.4476744 |
| ENSG00000131828 | 0.24251497 | 0.05681818 | 0.24251497 | 0.056818182 |             |  |           | 0.1785714 |
| ENSG00000167395 |            | 0.36666667 |            | 0.366666667 | 0.053571429 |  | 0.0988372 | 0.0988372 |
| ENSG00000178913 | 0.15361446 | 0.10909091 | 0.15361446 | 0.109090909 |             |  |           | 0.172619  |
| ENSG00000173391 | 0.30555556 | 0.5        | 0.30555556 | 0.5         | 0.380952381 |  | 0.372093  | 0.1976744 |
| ENSG00000112902 |            | 0.35       |            | 0.35        |             |  |           | 0.1111111 |
| ENSG00000148965 | 0.27844311 |            | 0.27844311 |             | 0.089285714 |  | 0.0755814 |           |
| ENSG00000216560 |            | 0.21515152 |            | 0.215151515 |             |  |           | 0.0523256 |
| ENSG00000158816 | 0.30555556 | 0.44886364 | 0.30555556 | 0.448863636 | 0.422619048 |  | 0.3662791 | 0.375     |
| ENSG00000174804 |            | 0.44242424 |            | 0.442424242 |             |  |           | 0.4476744 |
| ENSG00000168679 |            | 0.16969697 |            | 0.16969697  |             |  |           | 0.3139535 |
| ENSG00000197415 | 0.41317365 | 0.3006135  | 0.41317365 | 0.300613497 | 0.422619048 |  | 0.4127907 | 0.4772727 |
| ENSG00000137691 |            | 0.43939394 |            | 0.439393939 |             |  |           | 0.2705882 |
| ENSG00000101162 |            | 0.1969697  |            | 0.196969697 |             |  |           | 0.2209302 |
| ENSG00000150337 |            |            |            |             |             |  |           | 0.1976744 |
| ENSG00000143340 |            | 0.4030303  |            | 0.403030303 |             |  |           | 0.2732558 |
| ENSG00000130561 | 0.11377246 | 0.41212121 | 0.11377246 | 0.412121212 |             |  | 0.0813953 | 0.3023256 |
| ENSG00000198836 |            | 0.46363636 |            | 0.463636364 |             |  |           | 0.297619  |
| ENSG00000138442 |            | 0.18181818 |            | 0.181818182 |             |  |           |           |
| ENSG00000173976 |            | 0.22256098 |            | 0.222560976 |             |  |           |           |
| ENSG00000005156 |            | 0.49085366 |            | 0.490853659 |             |  |           | 0.377907  |

|                 |            |            |            |             |             |           |           |
|-----------------|------------|------------|------------|-------------|-------------|-----------|-----------|
| ENSG00000257184 |            | 0.38181818 |            | 0.381818182 |             |           | 0.2764706 |
| ENSG00000164944 |            | 0.24242424 |            | 0.242424242 |             |           | 0.4883721 |
| ENSG00000107036 |            | 0.40606061 |            | 0.406060606 |             | 0.127907  | 0.4204545 |
| ENSG00000185436 |            | 0.45977011 |            | 0.459770115 |             |           | 0.4705882 |
| ENSG00000166839 |            | 0.33333333 |            | 0.333333333 |             |           | 0.2151163 |
| ENSG00000014257 |            | 0.48484848 |            | 0.484848485 |             |           | 0.4444444 |
| ENSG00000133703 |            | 0.49695122 |            | 0.49695122  |             |           | 0.1882353 |
| ENSG00000151233 |            | 0.41818182 |            | 0.418181818 |             |           | 0.4011628 |
| ENSG00000178904 |            | 0.18888889 |            | 0.188888889 |             |           | 0.1022727 |
| ENSG00000075568 |            | 0.34545455 |            | 0.345454545 |             |           | 0.2674419 |
| ENSG00000137962 |            | 0.35889571 |            | 0.358895706 |             |           | 0.4186047 |
| ENSG00000197261 |            | 0.23636364 |            | 0.236363636 |             |           | 0.3546512 |
| ENSG00000110881 |            | 0.34146341 |            | 0.341463415 |             |           | 0.1337209 |
| ENSG00000125651 | 0.0748503  | 0.05151515 | 0.0748503  | 0.051515152 | 0.416666667 | 0.3430233 | 0.3662791 |
| ENSG00000178252 | 0.44610778 | 0.24242424 | 0.44610778 | 0.242424242 | 0.06626506  | 0.0872093 |           |
| ENSG00000151131 |            | 0.24157303 |            | 0.241573034 |             |           | 0.3522727 |
| ENSG00000204618 |            | 0.28484848 |            | 0.284848485 |             |           | 0.3895349 |
| ENSG00000156886 |            | 0.2816092  |            | 0.281609195 |             |           | 0.2386364 |
| ENSG00000165091 | 0.32934132 |            | 0.32934132 |             | 0.476190476 | 0.4883721 |           |
| ENSG00000162383 |            | 0.25304878 |            | 0.25304878  |             |           | 0.3176471 |
| ENSG00000198517 |            | 0.44242424 |            | 0.442424242 |             |           | 0.2848837 |
| ENSG00000163482 |            | 0.37575758 |            | 0.375757576 |             |           | 0.0843373 |
| ENSG00000027697 | 0.47402597 |            | 0.47402597 |             | 0.5         | 0.4418605 |           |
| ENSG00000122873 | 0.30538922 | 0.19886364 | 0.30538922 | 0.198863636 | 0.458333333 | 0.4352941 | 0.4431818 |
| ENSG00000103966 |            | 0.47878788 |            | 0.478787879 |             |           | 0.1022727 |
| ENSG00000173212 |            | 0.25766871 |            | 0.257668712 |             |           | 0.2647059 |
| ENSG00000108389 |            | 0.17777778 |            | 0.177777778 |             |           | 0.25      |
| ENSG00000011451 |            | 0.28484848 |            | 0.284848485 |             |           |           |
| ENSG00000112367 | 0.19461078 | 0.41818182 | 0.19461078 | 0.418181818 | 0.386904762 | 0.3837209 | 0.3662791 |
| ENSG00000167799 |            | 0.36585366 |            | 0.365853659 |             |           | 0.0872093 |
| ENSG00000189195 | 0.08333333 |            | 0.08333333 |             |             |           |           |
| ENSG00000053747 |            | 0.31111111 |            | 0.311111111 |             |           | 0.2159091 |
| ENSG00000151135 |            | 0.45757576 |            | 0.457575758 |             |           | 0.3255814 |
| ENSG00000166164 |            | 0.46575342 |            | 0.465753425 |             |           | 0.2236842 |
| ENSG00000005801 | 0.39090909 | 0.27058824 | 0.39090909 | 0.270588235 | 0.392857143 | 0.4534884 | 0.4204545 |
| ENSG00000091136 | 0.18452381 |            | 0.18452381 |             |             |           |           |
| ENSG00000152700 |            | 0.1        |            | 0.1         | 0.343373494 |           | 0.3662791 |
| ENSG00000090861 |            | 0.05487805 |            | 0.054878049 |             |           |           |
| ENSG00000110455 |            |            |            |             | 0.422222222 | 0.2272727 | 0.0639535 |
| ENSG00000110318 |            | 0.46036585 |            | 0.460365854 |             |           | 0.2325581 |
| ENSG00000106346 |            | 0.0969697  |            | 0.096969697 |             |           | 0.4117647 |
| ENSG00000196821 |            | 0.13939394 |            | 0.139393939 |             |           | 0.0988372 |
| ENSG00000101193 |            | 0.46060606 |            | 0.460606061 |             |           | 0.3139535 |
| ENSG00000112659 |            | 0.14848485 |            | 0.148484848 |             |           |           |
| ENSG00000066926 |            | 0.18787879 |            | 0.187878788 |             |           | 0.4825581 |
| ENSG00000179813 |            | 0.29310345 |            | 0.293103448 |             |           | 0.3764706 |
| ENSG00000123178 |            | 0.49444444 |            | 0.494444444 |             |           | 0.4583333 |
| ENSG00000162227 | 0.36227545 |            | 0.36227545 |             | 0.125       | 0.1569767 | 0.1453488 |
| ENSG00000120265 |            | 0.34756098 |            | 0.347560976 |             |           | 0.2888889 |
| ENSG00000189280 | 0.21385542 |            | 0.21385542 |             | 0.464285714 | 0.4127907 |           |
| ENSG00000184838 | 0.42771084 | 0.05       | 0.42771084 | 0.05        |             |           | 0.0555556 |
| ENSG00000166562 |            | 0.15       |            | 0.15        |             |           | 0.3636364 |
| ENSG00000090975 | 0.05688623 | 0.33333333 | 0.05688623 | 0.333333333 |             |           |           |
| ENSG00000135999 |            | 0.33030303 |            | 0.33030303  |             |           | 0.1802326 |

|                 |            |            |            |             |             |           |           |
|-----------------|------------|------------|------------|-------------|-------------|-----------|-----------|
| ENSG00000155066 |            | 0.48787879 |            | 0.487878788 |             |           | 0.4651163 |
| ENSG00000119487 | 0.45808383 | 0.40606061 | 0.45808383 | 0.406060606 | 0.43452381  | 0.4534884 | 0.3023256 |
| ENSG00000170454 | 0.10555556 | 0.36666667 | 0.10555556 | 0.366666667 |             |           | 0.4069767 |
| ENSG00000081692 |            | 0.41212121 |            | 0.412121212 |             |           | 0.2093023 |
| ENSG00000143373 | 0.46407186 | 0.32424242 | 0.46407186 | 0.324242424 | 0.351190476 | 0.4651163 | 0.4651163 |
| ENSG00000065485 |            | 0.39393939 |            | 0.393939394 |             |           | 0.4883721 |
| ENSG00000104872 | 0.33832335 | 0.45402299 | 0.33832335 | 0.454022989 | 0.392857143 | 0.3139535 | 0.2727273 |
| ENSG00000203780 |            | 0.41666667 |            | 0.416666667 |             |           | 0.3863636 |
| ENSG00000148384 |            | 0.47878788 |            | 0.478787879 |             |           | 0.2151163 |
| ENSG00000178568 |            | 0.44303797 |            | 0.443037975 |             |           | 0.4888889 |
| ENSG00000079819 | 0.3502994  | 0.34545455 | 0.3502994  | 0.345454545 | 0.5         | 0.4186047 | 0.2916667 |
| ENSG00000203740 | 0.07185629 |            | 0.07185629 |             | 0.291666667 |           | 0.2267442 |
| ENSG00000157103 | 0.2994012  | 0.30606061 | 0.2994012  | 0.306060606 | 0.375       | 0.3139535 | 0.4244186 |
| ENSG00000176915 | 0.38690476 |            | 0.38690476 |             | 0.454545455 |           | 0.4318182 |
| ENSG00000112541 |            | 0.46666667 |            | 0.466666667 |             |           | 0.4418605 |
| ENSG00000167618 |            |            |            |             | 0.243243243 | 0.2073171 |           |
| ENSG00000181381 |            | 0.42777778 |            | 0.427777778 |             |           | 0.3095238 |
| ENSG00000164520 | 0.17065868 | 0.4        | 0.17065868 | 0.4         | 0.411111111 | 0.4888889 | 0.1590909 |
| ENSG00000141485 |            | 0.44545455 |            | 0.445454545 |             |           | 0.2325581 |
| ENSG00000165731 |            | 0.26969697 |            | 0.26969697  |             |           | 0.4772727 |
| ENSG00000041515 | 0.22222222 | 0.44512195 | 0.22222222 | 0.445121951 | 0.318181818 | 0.3444444 | 0.2083333 |
| ENSG00000184731 |            | 0.11212121 |            | 0.112121212 |             |           | 0.1976744 |
| ENSG00000182952 |            | 0.47865854 |            | 0.478658537 |             | 0.1       | 0.3488372 |
| ENSG00000030419 |            | 0.41515152 |            | 0.415151515 |             |           | 0.3197674 |
| ENSG00000034063 | 0.48203593 |            | 0.48203593 |             | 0.095238095 | 0.2058824 |           |
| ENSG00000075213 | 0.1257485  | 0.25304878 | 0.1257485  | 0.25304878  | 0.180722892 | 0.1744186 |           |
| ENSG00000141034 |            | 0.3        |            | 0.3         |             |           | 0.1395349 |
| ENSG00000258512 |            |            |            |             |             |           | 0.0813953 |
| ENSG00000113810 |            | 0.4969697  |            | 0.496969697 |             |           | 0.2202381 |
| ENSG00000110777 |            | 0.43636364 |            | 0.436363636 |             |           | 0.1162791 |
| ENSG00000179604 |            | 0.43939394 |            | 0.439393939 |             |           | 0.4882353 |
| ENSG00000110025 |            | 0.37272727 |            | 0.372727273 |             |           | 0.1686047 |
| ENSG00000151304 |            | 0.25       |            | 0.25        |             |           |           |
| ENSG00000144909 | 0.33832335 | 0.08484848 | 0.33832335 | 0.084848485 | 0.160714286 | 0.1627907 | 0.0639535 |
| ENSG00000143954 | 0.33532934 | 0.32727273 | 0.33532934 | 0.327272727 | 0.386904762 | 0.3546512 | 0.4588235 |
| ENSG00000165490 | 0.47126437 | 0.4969697  | 0.47126437 | 0.496969697 | 0.188888889 | 0.3068182 | 0.3197674 |
| ENSG00000005889 |            | 0.29141104 |            | 0.291411043 |             |           | 0.3953488 |
| ENSG00000119335 |            |            |            |             |             |           | 0.0523256 |
| ENSG00000117009 |            | 0.24539877 |            | 0.245398773 |             |           | 0.3493976 |
| ENSG00000143995 |            | 0.4        |            | 0.4         |             |           | 0.2383721 |
| ENSG00000112293 | 0.43373494 | 0.30182927 | 0.43373494 | 0.301829268 | 0.148809524 | 0.2034884 | 0.4883721 |
| ENSG00000169813 | 0.25       |            | 0.25       |             | 0.288888889 | 0.3409091 | 0.3068182 |
| ENSG00000113312 |            |            |            |             | 0.119047619 | 0.25      |           |
| ENSG00000196715 |            | 0.42424242 |            | 0.424242424 |             |           | 0.4709302 |
| ENSG00000119718 |            | 0.42528736 |            | 0.425287356 |             |           | 0.1777778 |
| ENSG00000132603 | 0.27777778 | 0.40340909 | 0.27777778 | 0.403409091 | 0.081395349 | 0.0697674 | 0.0988372 |
| ENSG00000077238 |            | 0.47878788 |            | 0.478787879 |             |           | 0.377907  |
| ENSG00000164756 |            | 0.43333333 |            | 0.433333333 |             |           | 0.4534884 |
| ENSG00000100897 | 0.10479042 | 0.21818182 | 0.10479042 | 0.218181818 |             |           | 0.4294118 |
| ENSG00000064652 |            | 0.39393939 |            | 0.393939394 |             |           |           |
| ENSG00000135775 | 0.10479042 |            | 0.10479042 |             |             |           |           |
| ENSG00000155621 |            | 0.37575758 |            | 0.375757576 |             |           | 0.4651163 |
| ENSG00000160321 |            | 0.42283951 |            | 0.422839506 |             |           | 0.4593023 |
| ENSG00000171723 | 0.26347305 |            | 0.26347305 |             | 0.44047619  | 0.494186  | 0.4825581 |

|                 |            |            |            |             |             |           |           |
|-----------------|------------|------------|------------|-------------|-------------|-----------|-----------|
| ENSG00000100399 | 0.27222222 |            | 0.27222222 |             |             |           |           |
| ENSG0000026103  | 0.28484848 | 0.34969325 | 0.28484848 | 0.349693252 | 0.090361446 | 0.127907  | 0.4529412 |
| ENSG0000087008  |            | 0.28484848 |            | 0.284848485 |             |           | 0.2352941 |
| ENSG00000163501 |            | 0.39325843 |            | 0.393258427 |             |           | 0.2727273 |
| ENSG0000013810  |            | 0.36809816 |            | 0.36809816  |             |           | 0.3313953 |
| ENSG00000130433 | 0.27245509 | 0.35582822 | 0.27245509 | 0.355828221 | 0.267857143 | 0.3139535 | 0.4418605 |
| ENSG00000153291 |            | 0.23636364 |            | 0.236363636 | 0.142857143 | 0.1046512 | 0.2093023 |
| ENSG00000160224 | 0.4        | 0.45426829 | 0.4        | 0.454268293 | 0.477777778 | 0.3863636 | 0.3662791 |
| ENSG00000228006 | 0.47727273 |            | 0.47727273 |             | 0.488888889 | 0.4883721 |           |
| ENSG00000155508 |            | 0.12962963 |            | 0.12962963  |             |           | 0.0795455 |
| ENSG00000223526 | 0.28651685 | 0.44545455 | 0.28651685 | 0.445454545 | 0.455555556 | 0.3636364 | 0.0988372 |
| ENSG00000169575 | 0.28143713 | 0.2        | 0.28143713 | 0.2         | 0.095238095 | 0.244186  | 0.1627907 |
| ENSG00000104228 | 0.14444444 | 0.35757576 | 0.14444444 | 0.357575758 | 0.056818182 | 0.1444444 | 0.1363636 |
| ENSG00000102119 |            | 0.18965517 |            | 0.189655172 |             |           | 0.3181818 |
| ENSG00000128923 | 0.25       | 0.30606061 | 0.25       | 0.306060606 |             |           | 0.5       |
| ENSG00000105137 |            | 0.2969697  |            | 0.296969697 |             |           | 0.494186  |
| ENSG00000204130 |            | 0.09756098 |            | 0.097560976 |             |           | 0.122093  |
| ENSG00000064886 | 0.32831325 | 0.29444444 | 0.32831325 | 0.294444444 |             |           | 0.3863636 |
| ENSG0000046653  |            | 0.13939394 |            | 0.139393939 | 0.178571429 | 0.1104651 | 0.4476744 |
| ENSG00000182912 | 0.21666667 |            | 0.21666667 |             | 0.053571429 | 0.122093  |           |
| ENSG00000082074 | 0.44011976 | 0.37195122 | 0.44011976 | 0.37195122  | 0.470238095 | 0.4825581 | 0.375     |
| ENSG00000179941 |            | 0.3117284  |            | 0.311728395 |             |           | 0.0941176 |
| ENSG00000113719 |            | 0.37777778 |            | 0.377777778 |             |           | 0.1104651 |
| ENSG00000086598 | 0.19461078 |            | 0.19461078 |             | 0.108433735 | 0.0639535 |           |
| ENSG00000166848 | 0.36931818 |            | 0.36931818 |             | 0.193181818 | 0.2209302 |           |
| ENSG00000107201 | 0.43888889 | 0.27575758 | 0.43888889 | 0.275757576 | 0.444444444 | 0.3409091 | 0.25      |
| ENSG00000235942 | 0.08333333 |            | 0.08333333 |             | 0.5         | 0.4555556 |           |
| ENSG00000145242 |            | 0.375      |            | 0.375       |             |           | 0.4418605 |
| ENSG00000114745 | 0.35329341 | 0.1        | 0.35329341 | 0.1         | 0.303571429 | 0.1976744 | 0.2325581 |
| ENSG00000106462 |            | 0.07012195 |            | 0.070121951 |             |           |           |
| ENSG00000168209 |            | 0.36363636 |            | 0.363636364 |             |           | 0.2840909 |
| ENSG00000130303 |            |            |            |             |             |           | 0.3470588 |
| ENSG00000240849 |            | 0.33146067 |            | 0.331460674 |             |           | 0.2613636 |
| ENSG00000132781 | 0.26946108 | 0.29310345 | 0.26946108 | 0.293103448 | 0.379518072 | 0.3837209 | 0.452381  |
| ENSG00000254349 | 0.29640719 | 0.22368421 | 0.29640719 | 0.223684211 | 0.089285714 | 0.127907  |           |
| ENSG00000165138 |            | 0.27222222 |            | 0.272222222 |             |           | 0.4127907 |
| ENSG00000115661 |            | 0.32727273 |            | 0.327272727 |             |           | 0.2790698 |
| ENSG00000126583 | 0.05757576 |            | 0.05757576 |             |             |           |           |
| ENSG00000131732 | 0.45209581 | 0.05151515 | 0.45209581 | 0.051515152 | 0.25        | 0.2267442 |           |
| ENSG00000131037 |            |            |            |             | 0.107142857 | 0.1104651 |           |
| ENSG00000186777 |            | 0.1        |            | 0.1         |             |           |           |
| ENSG00000153956 | 0.45180723 | 0.25555556 | 0.45180723 | 0.255555556 | 0.391566265 | 0.3372093 | 0.2888889 |
| ENSG00000206527 |            | 0.47878788 |            | 0.478787879 |             |           | 0.3430233 |
| ENSG00000205328 | 0.42814371 |            | 0.42814371 |             | 0.113095238 |           |           |
| ENSG00000177707 | 0.0988024  |            | 0.0988024  |             | 0.095238095 | 0.0755814 |           |
| ENSG00000124440 |            | 0.18181818 |            | 0.181818182 |             |           | 0.4767442 |
| ENSG00000116273 |            | 0.35757576 |            | 0.357575758 |             |           | 0.4418605 |
| ENSG00000139180 |            | 0.2804878  |            | 0.280487805 |             |           | 0.3604651 |
| ENSG00000166012 | 0.39204545 | 0.38787879 | 0.39204545 | 0.387878788 | 0.102272727 | 0.0988372 | 0.4941176 |
| ENSG00000121310 | 0.19444444 |            | 0.19444444 |             | 0.303571429 | 0.2732558 | 0.2732558 |
| ENSG00000138398 | 0.16766467 | 0.15       | 0.16766467 | 0.15        | 0.214285714 | 0.2732558 | 0.0795455 |
| ENSG00000160058 |            | 0.15757576 |            | 0.157575758 |             |           |           |
| ENSG00000168827 | 0.38922156 | 0.43333333 | 0.38922156 | 0.433333333 | 0.133333333 | 0.25      | 0.4545455 |
| ENSG00000124067 |            | 0.15757576 |            | 0.157575758 |             |           | 0.1395349 |

|                 |            |            |            |             |             |           |           |
|-----------------|------------|------------|------------|-------------|-------------|-----------|-----------|
| ENSG00000165630 | 0.19444444 |            | 0.19444444 |             |             |           |           |
| ENSG00000169429 | 0.31437126 | 0.40606061 | 0.31437126 | 0.406060606 |             |           | 0.3197674 |
| ENSG00000164466 |            | 0.33333333 |            | 0.33333333  |             |           | 0.3294118 |
| ENSG00000170486 | 0.14371257 | 0.33231707 | 0.14371257 | 0.332317073 | 0.470238095 | 0.4764706 | 0.494186  |
| ENSG00000161217 | 0.46385542 | 0.43030303 | 0.46385542 | 0.43030303  | 0.19047619  | 0.1918605 | 0.2674419 |
| ENSG00000197728 | 0.14204545 |            | 0.14204545 |             | 0.277777778 |           | 0.2674419 |
| ENSG00000100029 | 0.48837209 | 0.06976744 | 0.48837209 | 0.069767442 | 0.226190476 |           | 0.2386364 |
| ENSG00000105357 |            | 0.16363636 |            | 0.163636364 |             |           | 0.25      |
| ENSG00000176515 | 0.46706587 | 0.28181818 | 0.46706587 | 0.281818182 | 0.261904762 | 0.3662791 | 0.3604651 |
| ENSG00000165392 | 0.31736527 |            | 0.31736527 |             |             |           |           |
| ENSG00000113763 |            | 0.19090909 |            | 0.190909091 |             |           | 0.372093  |
| ENSG00000165899 |            | 0.36503067 |            | 0.365030675 |             |           | 0.297619  |
| ENSG00000169515 |            | 0.17272727 |            | 0.172727273 |             |           | 0.1363636 |
| ENSG00000134285 | 0.07185629 |            | 0.07185629 |             | 0.465909091 | 0.4651163 |           |
| ENSG00000123975 |            | 0.12777778 |            | 0.127777778 |             |           | 0.0909091 |
| ENSG00000171960 | 0.28742515 |            | 0.28742515 |             | 0.375       | 0.494186  |           |
| ENSG00000115275 |            | 0.10909091 |            | 0.109090909 |             |           | 0.1860465 |
| ENSG00000105810 |            | 0.37730061 |            | 0.377300613 |             |           | 0.2613636 |
| ENSG00000130038 | 0.17664671 | 0.42222222 | 0.17664671 | 0.422222222 |             |           | 0.4476744 |
| ENSG00000111913 |            | 0.47222222 |            | 0.472222222 |             |           | 0.4764706 |
| ENSG00000170613 |            | 0.46296296 |            | 0.462962963 |             |           | 0.2267442 |
| ENSG00000165269 |            | 0.08333333 |            | 0.083333333 |             |           | 0.0823529 |
| ENSG00000139793 | 0.17222222 |            | 0.17222222 |             |             |           | 0.1022727 |
| ENSG00000160404 |            | 0.39393939 |            | 0.393939394 |             |           | 0.3430233 |
| ENSG00000082269 |            | 0.44848485 |            | 0.448484848 |             |           | 0.4127907 |
| ENSG00000146856 | 0.30239521 |            | 0.30239521 |             |             |           |           |
| ENSG00000127954 |            | 0.4        |            | 0.4         |             |           | 0.1860465 |
| ENSG00000169891 |            | 0.45121951 |            | 0.451219512 |             |           | 0.1627907 |
| ENSG00000186952 |            | 0.10909091 |            | 0.109090909 |             |           | 0.3197674 |
| ENSG00000080293 |            | 0.28787879 |            | 0.287878788 |             |           | 0.2882353 |
| ENSG00000125735 | 0.26347305 | 0.34242424 | 0.26347305 | 0.342424242 | 0.494047619 | 0.4186047 | 0.4545455 |
| ENSG00000160678 |            | 0.33888889 |            | 0.338888889 |             |           | 0.1477273 |
| ENSG00000119457 |            | 0.20555556 |            | 0.205555556 |             |           | 0.2045455 |
| ENSG00000148985 | 0.47005988 | 0.46363636 | 0.47005988 | 0.463636364 |             |           | 0.372093  |
| ENSG00000166963 |            | 0.3        |            | 0.3         |             |           | 0.3823529 |
| ENSG00000080572 | 0.38922156 |            | 0.38922156 |             | 0.482142857 | 0.4764706 |           |
| ENSG00000118491 | 0.06287425 |            | 0.06287425 |             |             |           |           |
| ENSG00000176533 | 0.4011976  | 0.4969697  | 0.4011976  | 0.496969697 | 0.458333333 | 0.4825581 | 0.4777778 |
| ENSG00000058335 | 0.22754491 |            | 0.22754491 |             |             |           | 0.3882353 |
| ENSG00000172426 |            | 0.14242424 |            | 0.142424242 |             |           | 0.3117647 |
| ENSG00000204687 |            |            |            |             |             |           | 0.2034884 |
| ENSG00000121577 |            | 0.41925466 |            | 0.419254658 | 0.327380952 | 0.3       | 0.3255814 |
| ENSG00000166226 | 0.38333333 | 0.2030303  | 0.38333333 | 0.203030303 | 0.377777778 | 0.4888889 | 0.1569767 |
| ENSG00000182759 |            | 0.23030303 |            | 0.23030303  |             |           | 0.3662791 |
| ENSG00000138385 | 0.26111111 |            | 0.26111111 |             | 0.202380952 | 0.1627907 |           |
| ENSG00000129933 |            | 0.37962963 |            | 0.37962963  |             |           | 0.3295455 |
| ENSG00000112378 |            | 0.46111111 |            | 0.461111111 |             |           | 0.4666667 |
| ENSG00000136448 |            | 0.44512195 |            | 0.445121951 |             |           | 0.4883721 |
| ENSG00000134504 | 0.11377246 | 0.12121212 | 0.11377246 | 0.121212121 | 0.208333333 | 0.1511628 | 0.0697674 |
| ENSG00000005189 |            | 0.38787879 |            | 0.387878788 |             |           | 0.1453488 |
| ENSG00000107815 |            | 0.16363636 |            | 0.163636364 |             |           | 0.4476744 |
| ENSG00000197045 |            | 0.15730337 |            | 0.157303371 |             |           |           |
| ENSG00000188227 |            | 0.22727273 |            | 0.227272727 |             |           | 0.3313953 |
| ENSG00000135899 | 0.12777778 |            | 0.12777778 |             | 0.25        | 0.2857143 |           |



|                 |            |            |            |             |             |           |           |
|-----------------|------------|------------|------------|-------------|-------------|-----------|-----------|
| ENSG00000147394 | 0.35555556 | 0.2195122  | 0.35555556 | 0.219512195 | 0.136363636 | 0.0568182 | 0.3546512 |
| ENSG00000108786 | 0.34730539 |            | 0.34730539 |             | 0.402439024 | 0.4476744 |           |
| ENSG00000115966 | 0.18975904 | 0.11627907 | 0.18975904 | 0.11627907  | 0.125       | 0.1352941 |           |
| ENSG00000186715 |            | 0.11627907 |            | 0.11627907  |             |           | 0.1744186 |
| ENSG00000182885 |            | 0.27325581 |            | 0.273255814 |             |           | 0.3604651 |
| ENSG00000063177 | 0.23053892 |            | 0.23053892 |             | 0.313253012 | 0.2093023 |           |
| ENSG00000163904 | 0.49101796 | 0.34242424 | 0.49101796 | 0.342424242 | 0.321428571 | 0.4069767 | 0.4767442 |
| ENSG00000151687 | 0.09281437 |            | 0.09281437 |             |             |           |           |
| ENSG00000243978 | 0.17065868 | 0.34848485 | 0.17065868 | 0.348484848 |             |           |           |
| ENSG00000181090 |            | 0.34242424 |            | 0.342424242 |             |           | 0.2965116 |
| ENSG00000067798 | 0.10479042 | 0.44753086 | 0.10479042 | 0.447530864 | 0.494047619 | 0.4761905 | 0.1627907 |
| ENSG00000184860 | 0.32222222 | 0.4030303  | 0.32222222 | 0.403030303 |             |           | 0.0872093 |
| ENSG00000086289 |            | 0.36363636 |            | 0.363636364 | 0.133333333 | 0.0888889 | 0.4244186 |
| ENSG00000121848 |            | 0.34444444 |            | 0.344444444 |             |           | 0.0930233 |
| ENSG00000128340 | 0.19879518 | 0.41111111 | 0.19879518 | 0.411111111 | 0.208333333 | 0.2034884 | 0.4659091 |
| ENSG00000113319 |            | 0.22777778 |            | 0.227777778 |             |           | 0.1136364 |
| ENSG00000198794 | 0.47904192 | 0.15454545 | 0.47904192 | 0.154545455 | 0.428571429 | 0.3895349 | 0.4642857 |
| ENSG00000255559 |            | 0.13888889 |            | 0.138888889 |             |           | 0.3522727 |
| ENSG00000155974 | 0.46060606 | 0.35757576 | 0.46060606 | 0.357575758 | 0.426829268 | 0.4268293 | 0.372093  |
| ENSG00000214189 | 0.0625     | 0.23333333 | 0.0625     | 0.233333333 |             |           | 0.3837209 |
| ENSG00000125812 |            | 0.27272727 |            | 0.272727273 |             |           | 0.3837209 |
| ENSG00000164399 | 0.11931818 |            | 0.11931818 |             | 0.444444444 | 0.4318182 |           |
| ENSG00000155660 |            | 0.2        |            | 0.2         |             |           |           |
| ENSG00000242732 |            | 0.17073171 |            | 0.170731707 |             |           | 0.0755814 |
| ENSG00000126215 | 0.16666667 |            | 0.16666667 |             | 0.477777778 | 0.4090909 |           |
| ENSG00000112818 |            | 0.36363636 |            | 0.363636364 |             |           | 0.4318182 |
| ENSG00000163714 | 0.47305389 | 0.47727273 | 0.47305389 | 0.477272727 | 0.355421687 | 0.3662791 | 0.3444444 |
| ENSG00000173706 |            | 0.37575758 |            | 0.375757576 |             |           | 0.4186047 |
| ENSG00000160307 | 0.3742515  | 0.09393939 | 0.3742515  | 0.093939394 | 0.125       | 0.0872093 | 0.3662791 |
| ENSG00000054803 | 0.0748503  |            | 0.0748503  |             | 0.464285714 | 0.494186  |           |
| ENSG00000107672 | 0.10555556 | 0.25862069 | 0.10555556 | 0.25862069  | 0.136363636 | 0.1707317 | 0.4318182 |
| ENSG00000115233 | 0.45454545 | 0.06441718 | 0.45454545 | 0.064417178 | 0.422222222 | 0.5       |           |
| ENSG00000167383 | 0.37125749 | 0.36196319 | 0.37125749 | 0.36196319  | 0.166666667 | 0.1395349 | 0.3895349 |
| ENSG00000198492 | 0.25555556 |            | 0.25555556 |             | 0.222222222 | 0.2272727 |           |
| ENSG00000124225 | 0.29819277 | 0.1        | 0.29819277 | 0.1         | 0.494047619 | 0.4883721 | 0.2325581 |
| ENSG00000133313 | 0.48314607 | 0.36585366 | 0.48314607 | 0.365853659 | 0.327380952 | 0.2790698 | 0.0813953 |
| ENSG00000135083 |            | 0.14242424 |            | 0.142424242 |             |           | 0.1627907 |
| ENSG00000128581 | 0.09580838 | 0.16060606 | 0.09580838 | 0.160606061 | 0.238095238 | 0.2790698 |           |
| ENSG00000223519 | 0.48802395 |            | 0.48802395 |             | 0.392857143 | 0.3882353 |           |
| ENSG00000188707 |            | 0.21515152 |            | 0.215151515 |             |           | 0.4186047 |
| ENSG00000100036 | 0.06287425 | 0.48275862 | 0.06287425 | 0.482758621 | 0.398809524 | 0.4883721 | 0.4883721 |
| ENSG00000166266 |            | 0.29885057 |            | 0.298850575 |             |           |           |
| ENSG00000177363 |            | 0.29090909 |            | 0.290909091 |             |           | 0.2732558 |
| ENSG00000137413 | 0.21556886 | 0.45348837 | 0.21556886 | 0.453488372 | 0.166666667 | 0.2034884 | 0.4883721 |
| ENSG00000121741 | 0.16666667 | 0.08787879 | 0.16666667 | 0.087878788 |             |           | 0.3222222 |
| ENSG00000143110 |            | 0.34848485 |            | 0.348484848 |             |           | 0.2848837 |
| ENSG00000258365 | 0.2005988  | 0.35955056 | 0.2005988  | 0.359550562 | 0.303571429 | 0.3837209 | 0.4090909 |
| ENSG00000198742 |            | 0.09815951 |            | 0.098159509 |             |           | 0.2411765 |
| ENSG00000101945 |            | 0.26666667 |            | 0.266666667 |             |           | 0.2034884 |
| ENSG00000136011 | 0.40718563 | 0.27300613 | 0.40718563 | 0.273006135 | 0.494047619 | 0.4825581 | 0.4244186 |
| ENSG00000152952 |            | 0.45731707 |            | 0.457317073 |             |           | 0.452381  |
| ENSG00000100342 | 0.11904762 | 0.1969697  | 0.11904762 | 0.196969697 |             |           | 0.1918605 |
| ENSG00000104885 |            | 0.10227273 |            | 0.102272727 |             |           | 0.244186  |
| ENSG00000157510 |            | 0.43597561 |            | 0.43597561  |             |           | 0.4069767 |

|                 |            |            |            |             |             |           |           |
|-----------------|------------|------------|------------|-------------|-------------|-----------|-----------|
| ENSG00000106258 |            |            |            |             |             |           | 0.2848837 |
| ENSG00000115850 |            | 0.10909091 |            | 0.109090909 |             |           | 0.1860465 |
| ENSG00000108947 |            | 0.42236025 |            | 0.422360248 |             |           | 0.4294118 |
| ENSG00000126814 |            |            |            |             | 0.084337349 | 0.0697674 | 0.3255814 |
| ENSG00000169744 |            | 0.23030303 |            | 0.23030303  |             |           | 0.3197674 |
| ENSG00000205336 | 0.21428571 | 0.46666667 | 0.21428571 | 0.466666667 | 0.397058824 | 0.3157895 | 0.244186  |
| ENSG00000138119 | 0.12874251 | 0.13939394 | 0.12874251 | 0.139393939 | 0.476190476 | 0.4767442 | 0.2647059 |
| ENSG00000105664 |            | 0.08787879 |            | 0.087878788 |             |           |           |
| ENSG00000132507 | 0.35757576 | 0.46060606 | 0.35757576 | 0.460606061 | 0.053571429 |           | 0.494186  |
| ENSG00000144136 | 0.48203593 | 0.21515152 | 0.48203593 | 0.215151515 |             |           |           |
| ENSG00000134318 | 0.23652695 | 0.43636364 | 0.23652695 | 0.436363636 |             |           | 0.3662791 |
| ENSG00000102021 | 0.05988024 | 0.31402439 | 0.05988024 | 0.31402439  |             |           | 0.0647059 |
| ENSG00000164287 | 0.31736527 | 0.34848485 | 0.31736527 | 0.348484848 | 0.44047619  | 0.3470588 | 0.3546512 |
| ENSG00000076864 |            | 0.15       |            | 0.15        |             |           |           |
| ENSG00000106018 |            | 0.39393939 |            | 0.393939394 |             |           | 0.25      |
| ENSG00000090061 | 0.11077844 |            | 0.11077844 |             |             |           |           |
| ENSG00000234284 |            | 0.34242424 |            | 0.342424242 |             |           | 0.4767442 |
| ENSG00000175449 | 0.45508982 | 0.35632184 | 0.45508982 | 0.356321839 | 0.327380952 | 0.3139535 | 0.4204545 |
| ENSG00000187942 |            | 0.2183908  |            | 0.218390805 |             |           | 0.1823529 |
| ENSG00000069966 | 0.39820359 | 0.31818182 | 0.39820359 | 0.318181818 | 0.380952381 | 0.4880952 | 0.2674419 |
| ENSG00000129009 | 0.42215569 | 0.17878788 | 0.42215569 | 0.178787879 |             |           |           |
| ENSG00000179029 |            | 0.37804878 |            | 0.37804878  |             |           | 0.4534884 |
| ENSG00000249852 |            | 0.10060976 |            | 0.100609756 |             |           | 0.2267442 |
| ENSG00000136805 |            | 0.20909091 |            | 0.209090909 |             |           | 0.3430233 |
| ENSG00000131791 |            | 0.48275862 |            | 0.482758621 |             |           | 0.4418605 |
| ENSG00000129354 |            |            |            |             |             |           | 0.4318182 |
| ENSG00000169507 |            | 0.36363636 |            | 0.363636364 |             |           | 0.4302326 |
| ENSG00000119328 |            |            |            |             |             |           | 0.4318182 |
| ENSG00000102908 |            | 0.49444444 |            | 0.494444444 |             |           | 0.3470588 |
| ENSG00000137807 | 0.27844311 | 0.05454545 | 0.27844311 | 0.054545455 | 0.15060241  | 0.2560976 | 0.3536585 |
| ENSG00000090447 |            | 0.45454545 |            | 0.454545455 |             |           | 0.2732558 |
| ENSG00000144278 | 0.4491018  | 0.45757576 | 0.4491018  | 0.457575758 | 0.202380952 | 0.244186  | 0.494186  |
| ENSG00000164125 | 0.4760479  | 0.27878788 | 0.4760479  | 0.278787879 | 0.053571429 |           | 0.1860465 |
| ENSG00000212950 |            | 0.22727273 |            | 0.227272727 |             |           | 0.3604651 |
| ENSG00000084234 |            |            |            |             |             |           | 0.0697674 |
| ENSG00000135953 |            | 0.47560976 |            | 0.475609756 |             |           | 0.3139535 |
| ENSG00000115221 |            | 0.43030303 |            | 0.43030303  |             |           | 0.4244186 |
| ENSG00000102755 |            | 0.08484848 |            | 0.084848485 |             |           | 0.3023256 |
| ENSG00000172548 |            | 0.47222222 |            | 0.472222222 |             |           | 0.3470588 |
| ENSG00000006606 | 0.12921348 | 0.25151515 | 0.12921348 | 0.251515152 |             |           | 0.1162791 |
| ENSG00000167747 | 0.22121212 | 0.35955056 | 0.22121212 | 0.359550562 | 0.31547619  | 0.3488372 | 0.3333333 |
| ENSG00000157778 |            | 0.11212121 |            | 0.112121212 |             |           |           |
| ENSG00000159648 |            |            |            |             |             |           | 0.4941176 |
| ENSG00000133835 | 0.25       | 0.45121951 | 0.25       | 0.451219512 | 0.481707317 | 0.4772727 | 0.3571429 |
| ENSG00000152284 |            | 0.48773006 |            | 0.487730061 |             |           | 0.2034884 |
| ENSG00000163029 | 0.49101796 | 0.31212121 | 0.49101796 | 0.312121212 |             | 0.0813953 | 0.1569767 |
| ENSG00000197111 |            | 0.16463415 |            | 0.164634146 |             |           |           |
| ENSG00000121964 |            | 0.46111111 |            | 0.461111111 |             |           | 0.1590909 |
| ENSG00000134049 |            | 0.07272727 |            | 0.072727273 |             |           | 0.2616279 |
| ENSG00000174469 | 0.46022727 | 0.46969697 | 0.46022727 | 0.46969697  | 0.277108434 | 0.3529412 | 0.3294118 |
| ENSG00000137261 | 0.17771084 | 0.43030303 | 0.17771084 | 0.43030303  | 0.119047619 | 0.1071429 | 0.3941176 |
| ENSG00000197321 | 0.46107784 |            | 0.46107784 |             | 0.303571429 |           | 0.2965116 |
| ENSG00000107263 | 0.09550562 | 0.29393939 | 0.09550562 | 0.293939394 | 0.214285714 | 0.255814  | 0.4823529 |
| ENSG00000083937 | 0.11077844 | 0.25       | 0.11077844 | 0.25        | 0.192771084 | 0.2083333 | 0.2727273 |

|                 |            |            |            |             |             |           |           |
|-----------------|------------|------------|------------|-------------|-------------|-----------|-----------|
| ENSG0000009954  |            | 0.18181818 |            | 0.181818182 |             |           | 0.127907  |
| ENSG00000185666 | 0.21666667 | 0.42121212 | 0.21666667 | 0.421212121 | 0.177777778 | 0.1931818 | 0.127907  |
| ENSG0000018610  |            | 0.41463415 |            | 0.414634146 |             |           | 0.2965116 |
| ENSG00000168491 |            | 0.47272727 |            | 0.472727273 |             |           | 0.3430233 |
| ENSG00000131051 |            | 0.18390805 |            | 0.183908046 |             |           | 0.1704545 |
| ENSG00000107951 |            | 0.47222222 |            | 0.472222222 |             |           | 0.3222222 |
| ENSG00000188869 | 0.30555556 |            | 0.30555556 |             | 0.311111111 | 0.4886364 |           |
| ENSG00000128989 |            | 0.11280488 |            | 0.112804878 |             |           | 0.4772727 |
| ENSG00000119421 |            | 0.26666667 |            | 0.266666667 |             |           | 0.3895349 |
| ENSG00000103423 | 0.3        | 0.35365854 | 0.3        | 0.353658537 | 0.255555556 | 0.1818182 | 0.3546512 |
| ENSG00000140093 |            | 0.17575758 |            | 0.175757576 |             |           | 0.3488372 |
| ENSG00000254377 |            | 0.16111111 |            | 0.161111111 |             |           | 0.4431818 |
| ENSG00000171587 |            | 0.47272727 |            | 0.472727273 |             |           | 0.4651163 |
| ENSG00000258986 | 0.32335329 | 0.38050314 | 0.32335329 | 0.380503145 | 0.366666667 | 0.4204545 | 0.4107143 |
| ENSG00000184465 | 0.16766467 | 0.24085366 | 0.16766467 | 0.240853659 | 0.357142857 | 0.4476744 | 0.202381  |
| ENSG00000169306 |            |            |            |             | 0.148809524 | 0.1785714 |           |
| ENSG00000159733 | 0.22222222 | 0.36111111 | 0.22222222 | 0.361111111 | 0.353658537 | 0.3780488 | 0.4302326 |
| ENSG00000181754 |            | 0.3045977  |            | 0.304597701 |             |           | 0.3977273 |
| ENSG00000218823 |            | 0.09146341 |            | 0.091463415 |             |           | 0.0581395 |
| ENSG00000115020 |            | 0.13030303 |            | 0.13030303  |             |           | 0.0581395 |
| ENSG00000151465 |            | 0.48850575 |            | 0.488505747 |             |           | 0.2386364 |
| ENSG00000179846 |            | 0.32926829 |            | 0.329268293 |             |           | 0.2763158 |
| ENSG00000168398 | 0.3125     | 0.28527607 | 0.3125     | 0.285276074 | 0.470238095 | 0.4883721 | 0.3953488 |
| ENSG00000135093 | 0.21257485 | 0.16666667 | 0.21257485 | 0.166666667 |             |           | 0.1453488 |
| ENSG00000162928 | 0.47305389 | 0.45454545 | 0.47305389 | 0.454545455 |             |           |           |
| ENSG00000174498 |            | 0.45555556 |            | 0.455555556 | 0.136904762 | 0.2209302 | 0.2151163 |
| ENSG00000169299 | 0.33233533 | 0.12345679 | 0.33233533 | 0.12345679  | 0.265060241 | 0.2093023 | 0.1395349 |
| ENSG00000006453 |            | 0.46969697 |            | 0.46969697  |             |           | 0.1802326 |
| ENSG00000219016 | 0.12275449 | 0.22222222 | 0.12275449 | 0.222222222 | 0.357142857 | 0.4186047 | 0.1477273 |
| ENSG00000077498 | 0.3        |            | 0.3        |             | 0.101190476 | 0.1453488 |           |
| ENSG00000204519 |            | 0.43678161 |            | 0.436781609 |             |           | 0.4883721 |
| ENSG00000058272 |            | 0.08181818 |            | 0.081818182 |             |           | 0.3392857 |
| ENSG00000135862 |            | 0.48850575 |            | 0.488505747 |             |           | 0.4431818 |
| ENSG00000006432 |            | 0.13636364 |            | 0.136363636 |             |           | 0.2209302 |
| ENSG00000117318 |            | 0.4        |            | 0.4         |             |           | 0.2034884 |
| ENSG00000163637 | 0.30538922 | 0.37730061 | 0.30538922 | 0.377300613 | 0.363095238 | 0.3023256 | 0.5       |
| ENSG00000068793 |            | 0.46111111 |            | 0.461111111 |             |           | 0.4302326 |
| ENSG00000158158 |            | 0.06969697 |            | 0.06969697  |             |           | 0.0755814 |
| ENSG00000184809 | 0.45       | 0.45121951 | 0.45       | 0.451219512 | 0.411111111 | 0.3522727 | 0.4244186 |
| ENSG00000183401 | 0.24096386 |            | 0.24096386 |             |             |           |           |
| ENSG00000167113 |            | 0.2        |            | 0.2         |             |           |           |
| ENSG00000188404 |            | 0.38484848 |            | 0.384848485 |             |           | 0.4360465 |
| ENSG00000119938 |            | 0.06666667 |            | 0.066666667 |             |           |           |
| ENSG00000095713 |            | 0.36969697 |            | 0.36969697  |             |           | 0.3372093 |
| ENSG00000173559 | 0.08682635 |            | 0.08682635 |             | 0.375       | 0.4709302 |           |
| ENSG00000204632 |            | 0.47575758 |            | 0.475757576 |             |           | 0.2674419 |
| ENSG00000175536 |            | 0.43636364 |            | 0.436363636 |             |           | 0.372093  |
| ENSG00000108469 |            | 0.34545455 |            | 0.345454545 |             |           | 0.4302326 |
| ENSG00000163395 | 0.40853659 | 0.39329268 | 0.40853659 | 0.393292683 | 0.409090909 | 0.372093  | 0.4360465 |
| ENSG00000165689 | 0.0813253  | 0.44444444 | 0.0813253  | 0.444444444 |             | 0.0941176 | 0.25      |
| ENSG00000160588 |            | 0.44827586 |            | 0.448275862 |             |           | 0.3295455 |
| ENSG00000069275 |            | 0.41158537 |            | 0.411585366 |             |           | 0.4651163 |
| ENSG00000121388 |            | 0.07471264 |            | 0.074712644 |             |           |           |
| ENSG00000172572 |            | 0.37575758 |            | 0.375757576 |             |           | 0.1511628 |

|                 |            |            |            |              |             |           |           |
|-----------------|------------|------------|------------|--------------|-------------|-----------|-----------|
| ENSG00000159423 | 0.11676647 | 0.43333333 | 0.11676647 | 0.4333333333 |             |           | 0.4534884 |
| ENSG0000058085  | 0.2005988  | 0.11212121 | 0.2005988  | 0.112121212  | 0.352272727 | 0.4186047 | 0.4360465 |
| ENSG00000132746 | 0.5        | 0.0969697  | 0.5        | 0.096969697  | 0.125       | 0.0535714 | 0.0523256 |
| ENSG00000115592 | 0.4378882  | 0.19512195 | 0.4378882  | 0.195121951  | 0.431818182 | 0.3139535 | 0.4244186 |
| ENSG00000187151 | 0.32335329 |            | 0.32335329 |              | 0.458333333 | 0.4418605 |           |
| ENSG00000116199 |            | 0.46666667 |            | 0.466666667  |             |           | 0.3662791 |
| ENSG00000170689 |            | 0.39655172 |            | 0.396551724  |             |           | 0.4090909 |
| ENSG00000183773 |            |            |            |              |             |           | 0.1136364 |
| ENSG00000165816 | 0.12275449 |            | 0.12275449 |              | 0.053571429 | 0.0639535 |           |
| ENSG00000129158 |            | 0.13030303 |            | 0.13030303   |             |           |           |
| ENSG00000127129 |            | 0.12195122 |            | 0.12195122   |             |           | 0.1046512 |
| ENSG00000123094 | 0.32022472 | 0.26234568 | 0.32022472 | 0.262345679  | 0.311111111 | 0.2555556 | 0.4709302 |
| ENSG00000114013 |            | 0.33231707 |            | 0.332317073  |             |           | 0.3372093 |
| ENSG00000123297 | 0.09659091 | 0.35714286 | 0.09659091 | 0.357142857  | 0.288888889 | 0.2840909 | 0.3026316 |
| ENSG00000078401 |            | 0.07878788 |            | 0.078787879  |             |           |           |
| ENSG00000103241 |            | 0.5        |            | 0.5          |             |           | 0.1529412 |
| ENSG00000105404 | 0.17964072 |            | 0.17964072 |              | 0.18452381  | 0.2470588 |           |
| ENSG00000162402 |            | 0.20606061 |            | 0.206060606  |             |           | 0.0755814 |
| ENSG00000077585 | 0.06626506 |            | 0.06626506 |              | 0.208333333 | 0.1569767 |           |
| ENSG00000042317 | 0.15060241 | 0.32727273 | 0.15060241 | 0.327272727  |             |           | 0.3197674 |
| ENSG00000066382 |            | 0.42222222 |            | 0.422222222  |             |           | 0.4058824 |
| ENSG00000183780 |            | 0.09090909 |            | 0.090909091  |             |           |           |
| ENSG00000177380 |            | 0.33908046 |            | 0.33908046   |             |           | 0.2045455 |
| ENSG00000120158 |            | 0.44512195 |            | 0.445121951  |             |           | 0.4702381 |
| ENSG00000134905 |            | 0.46666667 |            | 0.466666667  | 0.174698795 | 0.1860465 | 0.3023256 |
| ENSG00000105499 |            | 0.27380952 |            | 0.273809524  |             |           | 0.1352941 |
| ENSG00000070759 | 0.1        | 0.24848485 | 0.1        | 0.248484848  | 0.088888889 |           | 0.4302326 |
| ENSG00000134152 |            | 0.12121212 |            | 0.121212121  |             |           |           |
| ENSG00000198798 |            | 0.05757576 |            | 0.057575758  |             |           | 0.4235294 |
| ENSG00000007516 |            | 0.49090909 |            | 0.490909091  |             |           | 0.1511628 |
| ENSG00000166825 |            | 0.43597561 |            | 0.43597561   |             |           | 0.1686047 |
| ENSG00000183323 |            | 0.40184049 |            | 0.401840491  | 0.291666667 | 0.2034884 | 0.3433735 |
| ENSG00000178015 |            | 0.16666667 |            | 0.166666667  |             |           | 0.4431818 |
| ENSG00000108387 |            | 0.42424242 |            | 0.424242424  |             |           | 0.4411765 |
| ENSG00000197587 |            | 0.23636364 |            | 0.236363636  |             |           | 0.3023256 |
| ENSG00000115415 | 0.48863636 | 0.42682927 | 0.48863636 | 0.426829268  | 0.5         | 0.4545455 | 0.1104651 |
| ENSG00000105483 | 0.22155689 | 0.40606061 | 0.22155689 | 0.406060606  | 0.482142857 | 0.4302326 | 0.4302326 |
| ENSG00000110911 | 0.33233533 | 0.43167702 | 0.33233533 | 0.431677019  | 0.375       | 0.4418605 | 0.4534884 |
| ENSG00000203721 | 0.34444444 | 0.28333333 | 0.34444444 | 0.283333333  | 0.244444444 | 0.1818182 | 0.1818182 |
| ENSG00000108556 |            | 0.33333333 |            | 0.333333333  |             |           | 0.3068182 |
| ENSG00000163349 |            | 0.49386503 |            | 0.493865031  |             |           | 0.3255814 |
| ENSG00000181481 | 0.18333333 |            | 0.18333333 |              |             |           |           |
| ENSG00000095932 |            |            |            |              |             |           | 0.1627907 |
| ENSG00000120533 |            | 0.10555556 |            | 0.105555556  |             |           | 0.0909091 |
| ENSG00000124942 |            | 0.12121212 |            | 0.121212121  |             |           | 0.1162791 |
| ENSG00000039560 | 0.35       | 0.41463415 | 0.35       | 0.414634146  | 0.420454545 | 0.3636364 | 0.4127907 |
| ENSG00000197562 |            | 0.46969697 |            | 0.46969697   |             |           | 0.3546512 |
| ENSG00000102572 |            | 0.29393939 |            | 0.293939394  |             |           | 0.2272727 |
| ENSG00000011258 |            | 0.47560976 |            | 0.475609756  |             |           | 0.4411765 |
| ENSG00000241595 |            | 0.24719101 |            | 0.247191011  |             |           |           |
| ENSG00000184343 | 0.09939759 |            | 0.09939759 |              | 0.44047619  | 0.3488372 | 0.3068182 |
| ENSG00000125354 | 0.06927711 | 0.24382716 | 0.06927711 | 0.24382716   | 0.363095238 | 0.2209302 | 0.2848837 |
| ENSG00000188694 |            | 0.05454545 |            | 0.054545455  |             |           | 0.1511628 |
| ENSG00000175189 |            | 0.25914634 |            | 0.259146341  |             |           | 0.475     |



|                 |            |            |            |             |             |           |           |
|-----------------|------------|------------|------------|-------------|-------------|-----------|-----------|
| ENSG00000215066 | 0.43072289 | 0.16860465 | 0.43072289 | 0.168604651 | 0.271084337 | 0.2906977 | 0.3414634 |
| ENSG00000180530 |            | 0.35276074 |            | 0.352760736 |             |           | 0.3433735 |
| ENSG00000138079 | 0.17365269 | 0.34242424 | 0.17365269 | 0.342424242 | 0.345238095 | 0.4176471 | 0.4069767 |
| ENSG00000172456 | 0.36526946 |            | 0.36526946 |             | 0.416666667 | 0.494186  |           |
| ENSG00000143183 | 0.07777778 |            | 0.07777778 |             |             |           |           |
| ENSG00000153815 | 0.37222222 | 0.2030303  | 0.37222222 | 0.203030303 | 0.38372093  | 0.4418605 |           |
| ENSG00000110786 |            |            |            |             | 0.321428571 | 0.255814  |           |
| ENSG00000134369 |            | 0.44848485 |            | 0.448484848 | 0.288888889 | 0.2267442 | 0.4476744 |
| ENSG00000123700 | 0.30555556 |            | 0.30555556 |             |             |           |           |
| ENSG00000185608 | 0.47222222 |            | 0.47222222 |             | 0.464285714 | 0.439759  |           |
| ENSG00000127914 |            | 0.39490446 |            | 0.394904459 |             |           | 0.1704545 |
| ENSG00000138801 | 0.17613636 | 0.25925926 | 0.17613636 | 0.259259259 |             |           | 0.4476744 |
| ENSG00000088726 | 0.34831461 |            | 0.34831461 |             | 0.177777778 | 0.1136364 |           |
| ENSG00000178425 |            | 0.47777778 |            | 0.477777778 |             |           | 0.377907  |
| ENSG00000197694 | 0.46407186 |            | 0.46407186 |             | 0.464285714 | 0.4825581 |           |
| ENSG00000213741 |            | 0.22777778 |            | 0.227777778 |             |           | 0.1136364 |
| ENSG00000171984 |            | 0.43939394 |            | 0.439393939 |             |           | 0.3023256 |
| ENSG00000213578 |            |            |            |             |             |           | 0.1918605 |
| ENSG00000101890 | 0.15060241 |            | 0.15060241 |             | 0.125       | 0.1428571 |           |
| ENSG00000145824 |            | 0.07272727 |            | 0.072727273 |             |           | 0.0882353 |
| ENSG00000173335 |            | 0.35757576 |            | 0.357575758 |             |           | 0.25      |
| ENSG00000184305 |            | 0.46551724 |            | 0.465517241 |             |           | 0.3333333 |
| ENSG00000128891 | 0.22155689 | 0.5        | 0.22155689 | 0.5         | 0.101190476 | 0.1162791 | 0.3430233 |
| ENSG00000082641 | 0.43820225 |            | 0.43820225 |             | 0.174418605 | 0.1888889 |           |
| ENSG00000111981 |            |            |            |             |             |           | 0.3295455 |
| ENSG00000257599 |            | 0.17073171 |            | 0.170731707 |             |           | 0.0647059 |
| ENSG00000129521 |            | 0.22619048 |            | 0.226190476 |             |           | 0.4069767 |
| ENSG00000186732 | 0.48802395 |            | 0.48802395 |             | 0.083333333 | 0.1395349 |           |
| ENSG00000203865 | 0.05688623 |            | 0.05688623 |             | 0.285714286 | 0.3255814 |           |
| ENSG00000258572 |            | 0.35454545 |            | 0.354545455 |             |           | 0.2848837 |
| ENSG00000006007 |            | 0.25757576 |            | 0.257575758 |             |           | 0.3953488 |
| ENSG00000197256 |            | 0.39090909 |            | 0.390909091 |             |           | 0.3604651 |
| ENSG00000069869 |            | 0.409375   |            | 0.409375    |             |           | 0.3975904 |
| ENSG00000151715 |            | 0.34146341 |            | 0.341463415 |             |           | 0.4418605 |
| ENSG00000166068 |            | 0.25151515 |            | 0.251515152 |             |           | 0.2034884 |
| ENSG00000156787 |            | 0.44242424 |            | 0.442424242 |             |           | 0.4651163 |
| ENSG00000177614 |            |            |            |             |             |           | 0.0542169 |
| ENSG00000008517 | 0.18484848 |            | 0.18484848 |             | 0.071428571 |           |           |
| ENSG00000197479 | 0.2994012  |            | 0.2994012  |             |             |           |           |
| ENSG00000184277 |            | 0.46363636 |            | 0.463636364 |             |           |           |
| ENSG00000072042 |            | 0.12121212 |            | 0.121212121 |             |           | 0.1918605 |
| ENSG00000090266 | 0.26946108 |            | 0.26946108 |             | 0.148809524 | 0.0581395 |           |
| ENSG00000113492 |            | 0.45757576 |            | 0.457575758 |             |           | 0.4705882 |
| ENSG00000168267 |            | 0.06969697 |            | 0.06969697  |             |           | 0.3411765 |
| ENSG00000069206 |            | 0.34545455 |            | 0.345454545 |             |           | 0.3023256 |
| ENSG00000131773 |            | 0.15151515 |            | 0.151515152 |             |           |           |
| ENSG00000111412 |            |            |            |             | 0.273809524 | 0.3837209 | 0.2790698 |
| ENSG00000151690 |            | 0.30745342 |            | 0.307453416 |             |           | 0.3546512 |
| ENSG00000008394 |            | 0.3        |            | 0.3         |             |           | 0.3372093 |
| ENSG00000167371 |            | 0.17272727 |            | 0.172727273 |             |           | 0.0647059 |
| ENSG00000139722 | 0.26347305 | 0.11212121 | 0.26347305 | 0.112121212 |             |           | 0.2209302 |
| ENSG00000128607 |            | 0.43030303 |            | 0.43030303  |             |           | 0.4593023 |
| ENSG00000163539 |            | 0.43636364 |            | 0.436363636 |             |           | 0.4318182 |
| ENSG00000104093 | 0.48484848 | 0.1969697  | 0.48484848 | 0.196969697 | 0.446428571 | 0.4651163 |           |

|                 |            |            |            |             |             |           |           |
|-----------------|------------|------------|------------|-------------|-------------|-----------|-----------|
| ENSG00000115649 | 0.22754491 | 0.4030303  | 0.22754491 | 0.403030303 | 0.255952381 | 0.25      | 0.25      |
| ENSG00000163655 |            | 0.35555556 |            | 0.355555556 |             |           | 0.3977273 |
| ENSG00000188620 |            | 0.46060606 |            | 0.460606061 |             |           | 0.2093023 |
| ENSG00000197343 | 0.30239521 | 0.11585366 | 0.30239521 | 0.115853659 |             |           |           |
| ENSG00000077984 | 0.11377246 | 0.42682927 | 0.11377246 | 0.426829268 | 0.071428571 | 0.127907  | 0.125     |
| ENSG00000188163 |            |            |            |             |             |           | 0.0813953 |
| ENSG00000154258 |            | 0.31212121 |            | 0.312121212 |             |           | 0.4117647 |
| ENSG00000087245 |            | 0.42424242 |            | 0.424242424 |             |           | 0.25      |
| ENSG00000163915 |            |            |            |             |             |           | 0.1511628 |
| ENSG00000133318 |            | 0.11666667 |            | 0.116666667 |             |           |           |
| ENSG00000131871 |            | 0.31515152 |            | 0.315151515 |             |           | 0.255814  |
| ENSG00000197119 | 0.21257485 | 0.4695122  | 0.21257485 | 0.469512195 | 0.148809524 | 0.2732558 | 0.2674419 |
| ENSG00000251569 | 0.10674157 |            | 0.10674157 |             |             |           |           |
| ENSG00000135249 | 0.46067416 |            | 0.46067416 |             |             | 0.1136364 |           |
| ENSG00000198815 | 0.43888889 | 0.13803681 | 0.43888889 | 0.13803681  |             |           | 0.3430233 |
| ENSG00000198780 |            | 0.38125    |            | 0.38125     |             |           | 0.3988095 |
| ENSG00000114857 |            | 0.33030303 |            | 0.33030303  |             |           | 0.4825581 |
| ENSG00000132424 |            | 0.5        |            | 0.5         |             |           | 0.2906977 |
| ENSG00000136541 |            | 0.05454545 |            | 0.054545455 | 0.06547619  |           |           |
| ENSG00000101216 |            | 0.44848485 |            | 0.448484848 |             |           | 0.4777778 |
| ENSG00000253320 |            | 0.37878788 |            | 0.378787879 |             |           | 0.3571429 |
| ENSG00000108352 |            | 0.33333333 |            | 0.333333333 |             |           | 0.3139535 |
| ENSG00000101782 | 0.42777778 |            | 0.42777778 |             | 0.255555556 | 0.3181818 |           |
| ENSG00000103942 |            | 0.47839506 |            | 0.478395062 |             |           | 0.4767442 |
| ENSG00000185024 | 0.5        | 0.33707865 | 0.5        | 0.337078652 | 0.172619048 | 0.1511628 |           |
| ENSG00000182899 |            | 0.13190184 |            | 0.13190184  |             |           | 0.0697674 |
| ENSG00000139644 | 0.29444444 | 0.07575758 | 0.29444444 | 0.075757576 |             |           | 0.0795455 |
| ENSG00000152684 | 0.28977273 | 0.40243902 | 0.28977273 | 0.402439024 | 0.244444444 | 0.3068182 | 0.4651163 |
| ENSG00000232769 |            | 0.44207317 |            | 0.442073171 |             |           | 0.0639535 |
| ENSG00000146678 |            | 0.06134969 |            | 0.061349693 |             |           |           |
| ENSG00000171657 |            | 0.22727273 |            | 0.227272727 |             |           | 0.1136364 |
| ENSG00000157423 |            | 0.40555556 |            | 0.405555556 |             |           | 0.4127907 |
| ENSG00000111961 | 0.23295455 | 0.4030303  | 0.23295455 | 0.403030303 | 0.416666667 | 0.4127907 | 0.372093  |
| ENSG00000005981 |            | 0.48787879 |            | 0.487878788 |             |           | 0.1860465 |
| ENSG00000145284 | 0.18263473 | 0.34146341 | 0.18263473 | 0.341463415 |             |           | 0.3035714 |
| ENSG00000177125 |            | 0.12727273 |            | 0.127272727 |             |           | 0.3895349 |
| ENSG00000163081 | 0.48802395 |            | 0.48802395 |             | 0.355421687 | 0.4011628 |           |
| ENSG00000077616 | 0.23652695 | 0.45555556 | 0.23652695 | 0.455555556 | 0.404761905 | 0.3662791 | 0.3522727 |
| ENSG00000089091 | 0.44311377 |            | 0.44311377 |             | 0.410714286 | 0.494186  |           |
| ENSG00000126561 |            | 0.2        |            | 0.2         |             |           | 0.3837209 |
| ENSG00000178795 |            | 0.32424242 |            | 0.324242424 |             |           | 0.2325581 |
| ENSG00000178188 | 0.20658683 |            | 0.20658683 |             | 0.166666667 | 0.1337209 |           |
| ENSG00000124575 |            | 0.06363636 |            | 0.063636364 |             |           |           |
| ENSG00000165076 |            | 0.46060606 |            | 0.460606061 |             |           | 0.4767442 |
| ENSG00000203877 | 0.47904192 |            | 0.47904192 |             | 0.340909091 | 0.244186  |           |
| ENSG00000204965 | 0.26111111 | 0.05151515 | 0.26111111 | 0.051515152 | 0.464285714 | 0.4883721 | 0.1162791 |
| ENSG00000163810 |            | 0.47575758 |            | 0.475757576 |             |           | 0.1104651 |
| ENSG00000108244 | 0.21556886 |            | 0.21556886 |             | 0.458333333 | 0.494186  |           |
| ENSG00000123545 |            | 0.30555556 |            | 0.305555556 |             |           | 0.3181818 |
| ENSG00000235711 |            | 0.39329268 |            | 0.393292683 |             |           | 0.375     |
| ENSG00000000003 |            | 0.42121212 |            | 0.421212121 |             |           | 0.2823529 |
| ENSG00000247077 |            | 0.38333333 |            | 0.383333333 |             |           | 0.4       |
| ENSG00000213265 | 0.27777778 |            | 0.27777778 |             | 0.277777778 | 0.2111111 |           |
| ENSG00000077044 |            | 0.32424242 |            | 0.324242424 |             |           | 0.4186047 |

|                 |            |            |            |             |             |           |           |
|-----------------|------------|------------|------------|-------------|-------------|-----------|-----------|
| ENSG00000133619 |            | 0.17878788 |            | 0.178787879 |             |           | 0.1511628 |
| ENSG00000065600 | 0.13414634 | 0.35454545 | 0.13414634 | 0.354545455 | 0.081395349 | 0.0909091 | 0.372093  |
| ENSG00000196305 | 0.20658683 | 0.15454545 | 0.20658683 | 0.154545455 |             |           | 0.1104651 |
| ENSG00000092009 |            | 0.12727273 |            | 0.127272727 |             |           |           |
| ENSG00000132016 | 0.29041916 | 0.27777778 | 0.29041916 | 0.277777778 | 0.303571429 | 0.3255814 | 0.3255814 |
| ENSG00000096384 | 0.12883436 |            | 0.12883436 |             | 0.345238095 | 0.2647059 |           |
| ENSG00000160145 | 0.41111111 | 0.3908046  | 0.41111111 | 0.390804598 | 0.454545455 | 0.4186047 | 0.4418605 |
| ENSG00000082805 |            | 0.42727273 |            | 0.427272727 |             |           | 0.1363636 |
| ENSG00000107077 | 0.11363636 | 0.49079755 | 0.11363636 | 0.490797546 | 0.186046512 | 0.2222222 | 0.4534884 |
| ENSG00000163958 |            | 0.18787879 |            | 0.187878788 |             |           | 0.4823529 |
| ENSG00000213190 | 0.32386364 | 0.22121212 | 0.32386364 | 0.221212121 | 0.088888889 | 0.0639535 | 0.1395349 |
| ENSG00000178409 |            | 0.37777778 |            | 0.377777778 |             |           | 0.244186  |
| ENSG00000165322 |            | 0.47256098 |            | 0.472560976 |             |           | 0.4588235 |
| ENSG00000123064 |            |            |            |             |             |           | 0.2790698 |
| ENSG00000158856 | 0.45808383 | 0.21515152 | 0.45808383 | 0.215151515 |             |           |           |
| ENSG00000116138 |            | 0.22727273 |            | 0.227272727 |             |           | 0.4476744 |
| ENSG00000141576 |            | 0.2804878  |            | 0.280487805 |             |           | 0.1941176 |
| ENSG00000140416 | 0.45       | 0.36666667 | 0.45       | 0.366666667 | 0.5         | 0.5       |           |
| ENSG00000075303 | 0.17977528 |            | 0.17977528 |             | 0.133333333 | 0.1744186 |           |
| ENSG00000168348 |            | 0.16060606 |            | 0.160606061 |             |           | 0.3953488 |
| ENSG00000221890 |            | 0.42727273 |            | 0.427272727 |             |           | 0.2965116 |
| ENSG00000155111 |            | 0.27575758 |            | 0.275757576 |             |           | 0.3430233 |
| ENSG00000138085 | 0.16766467 |            | 0.16766467 |             | 0.113095238 | 0.0523256 |           |
| ENSG00000105699 | 0.32634731 |            | 0.32634731 |             | 0.208333333 | 0.127907  |           |
| ENSG00000119953 |            | 0.40243902 |            | 0.402439024 |             |           | 0.1569767 |
| ENSG00000184515 | 0.25903614 |            | 0.25903614 |             |             |           |           |
| ENSG00000139835 |            |            |            |             |             |           | 0.1104651 |
| ENSG00000198010 |            | 0.47701149 |            | 0.477011494 |             |           | 0.4642857 |
| ENSG00000100600 |            | 0.4030303  |            | 0.403030303 |             |           | 0.0872093 |
| ENSG00000116667 |            | 0.29545455 |            | 0.295454545 |             |           | 0.2840909 |
| ENSG00000109323 |            | 0.47575758 |            | 0.475757576 |             |           | 0.4761905 |
| ENSG00000082212 |            | 0.36363636 |            | 0.363636364 |             |           | 0.4709302 |
| ENSG00000148600 |            | 0.45757576 |            | 0.457575758 |             |           | 0.3430233 |
| ENSG00000149179 |            | 0.14545455 |            | 0.145454545 | 0.409638554 | 0.3139535 | 0.3139535 |
| ENSG00000172671 | 0.13554217 | 0.13109756 | 0.13554217 | 0.131097561 | 0.178571429 | 0.2294118 | 0.1104651 |
| ENSG00000137270 |            | 0.15454545 |            | 0.154545455 |             |           | 0.0930233 |
| ENSG00000133250 | 0.31626506 | 0.45454545 | 0.31626506 | 0.454545455 | 0.142857143 | 0.1627907 | 0.3837209 |
| ENSG00000182628 |            | 0.44545455 |            | 0.445454545 |             |           | 0.377907  |
| ENSG00000160219 |            | 0.37195122 |            | 0.37195122  |             |           | 0.244186  |
| ENSG00000116906 | 0.46706587 |            | 0.46706587 |             | 0.385542169 | 0.372093  |           |
| ENSG00000170802 |            | 0.31515152 |            | 0.315151515 |             |           | 0.4883721 |
| ENSG00000164325 |            | 0.46060606 |            | 0.460606061 |             |           | 0.2848837 |
| ENSG00000170323 |            | 0.13636364 |            | 0.136363636 |             |           | 0.3023256 |
| ENSG00000137103 | 0.17065868 | 0.33333333 | 0.17065868 | 0.333333333 | 0.363095238 | 0.3411765 | 0.1627907 |
| ENSG00000168703 |            | 0.36206897 |            | 0.362068966 |             |           | 0.1136364 |
| ENSG00000013364 |            |            |            |             |             | 0.0853659 |           |
| ENSG00000187105 | 0.45180723 |            | 0.45180723 |             | 0.108433735 |           |           |
| ENSG00000157131 |            |            |            |             |             |           | 0.060241  |
| ENSG00000185250 | 0.25301205 | 0.38787879 | 0.25301205 | 0.387878788 | 0.375       | 0.4411765 | 0.4011628 |
| ENSG00000155100 |            |            |            |             |             |           | 0.0777778 |
| ENSG00000198089 |            | 0.29393939 |            | 0.293939394 |             |           | 0.3837209 |
| ENSG00000183255 |            | 0.45757576 |            | 0.457575758 |             |           | 0.4476744 |
| ENSG00000143390 | 0.05389222 | 0.33333333 | 0.05389222 | 0.333333333 |             |           | 0.494186  |
| ENSG00000182968 |            | 0.35060976 |            | 0.350609756 |             |           | 0.4470588 |



|                 |            |            |            |             |             |           |           |
|-----------------|------------|------------|------------|-------------|-------------|-----------|-----------|
| ENSG00000124172 |            | 0.31515152 |            | 0.315151515 |             |           | 0.2209302 |
| ENSG00000133026 |            | 0.37878788 |            | 0.378787879 |             |           | 0.3294118 |
| ENSG0000010810  | 0.41573034 | 0.16666667 | 0.41573034 | 0.166666667 | 0.273809524 | 0.255814  | 0.3139535 |
| ENSG00000178695 |            | 0.43292683 |            | 0.432926829 |             |           | 0.3529412 |
| ENSG00000124134 |            | 0.4030303  |            | 0.403030303 |             |           | 0.1976744 |
| ENSG00000163660 | 0.05722892 |            | 0.05722892 |             |             |           |           |
| ENSG00000109066 | 0.48275862 | 0.29012346 | 0.48275862 | 0.290123457 | 0.3         | 0.2954545 | 0.4285714 |
| ENSG00000110436 |            | 0.37575758 |            | 0.375757576 | 0.05952381  | 0.0581395 | 0.4431818 |
| ENSG00000198271 |            |            |            |             |             |           | 0.1470588 |
| ENSG00000100906 |            | 0.3902439  |            | 0.390243902 |             |           | 0.2732558 |
| ENSG00000186188 |            | 0.32222222 |            | 0.322222222 |             |           | 0.1590909 |
| ENSG00000165556 | 0.32035928 | 0.49090909 | 0.32035928 | 0.490909091 | 0.398809524 | 0.4360465 | 0.4418605 |
| ENSG00000153885 |            | 0.33888889 |            | 0.338888889 |             |           | 0.2272727 |
| ENSG00000166024 | 0.08682635 | 0.34545455 | 0.08682635 | 0.345454545 | 0.321428571 | 0.2616279 | 0.4825581 |
| ENSG00000143344 | 0.05389222 | 0.44848485 | 0.05389222 | 0.448484848 |             |           | 0.4882353 |
| ENSG00000203870 |            | 0.2962963  |            | 0.296296296 |             |           | 0.2151163 |
| ENSG00000168795 |            | 0.07878788 |            | 0.078787879 |             |           | 0.494186  |
| ENSG00000162769 |            | 0.47727273 |            | 0.477272727 |             |           | 0.4886364 |
| ENSG00000092200 |            | 0.32777778 |            | 0.327777778 |             |           | 0.3977273 |
| ENSG00000164458 | 0.18562874 | 0.35757576 | 0.18562874 | 0.357575758 | 0.246987952 | 0.2732558 | 0.2732558 |
| ENSG00000148773 |            | 0.46666667 |            | 0.466666667 |             |           | 0.4886364 |
| ENSG00000124126 |            | 0.47272727 |            | 0.472727273 |             |           | 0.4634146 |
| ENSG00000170423 | 0.35493827 |            | 0.35493827 |             | 0.488095238 | 0.4883721 |           |
| ENSG00000140386 | 0.22777778 | 0.49390244 | 0.22777778 | 0.493902439 | 0.454545455 | 0.4204545 | 0.3953488 |
| ENSG00000188522 |            | 0.48181818 |            | 0.481818182 |             |           | 0.4767442 |
| ENSG00000134882 |            | 0.31481481 |            | 0.314814815 |             |           | 0.4       |
| ENSG00000147912 | 0.14444444 | 0.16969697 | 0.14444444 | 0.16969697  |             |           | 0.1569767 |
| ENSG00000166747 |            | 0.34545455 |            | 0.345454545 |             |           | 0.3117647 |
| ENSG00000108219 | 0.37272727 | 0.4691358  | 0.37272727 | 0.469135802 | 0.144578313 | 0.1235294 | 0.1337209 |
| ENSG00000132485 |            | 0.48333333 |            | 0.483333333 |             |           | 0.2380952 |
| ENSG00000258171 |            | 0.16666667 |            | 0.166666667 |             |           | 0.0930233 |
| ENSG00000240303 | 0.41515152 | 0.11212121 | 0.41515152 | 0.112121212 | 0.488095238 | 0.3197674 | 0.0813953 |
| ENSG00000152359 | 0.16467066 | 0.07272727 | 0.16467066 | 0.072727273 | 0.482142857 | 0.4588235 | 0.3588235 |
| ENSG00000170464 |            | 0.28353659 |            | 0.283536585 |             |           | 0.4186047 |
| ENSG00000143437 |            | 0.36060606 |            | 0.360606061 |             |           | 0.3953488 |
| ENSG0000020426  |            | 0.09444444 |            | 0.094444444 |             |           | 0.3888889 |
| ENSG00000162994 |            | 0.48181818 |            | 0.481818182 |             |           | 0.4534884 |
| ENSG00000138771 |            | 0.22424242 |            | 0.224242424 |             |           | 0.2383721 |
| ENSG00000178028 |            | 0.3        |            | 0.3         |             |           | 0.2674419 |
| ENSG00000135547 |            | 0.40606061 |            | 0.406060606 |             |           | 0.3546512 |
| ENSG00000205339 |            | 0.46363636 |            | 0.463636364 |             |           | 0.3630952 |
| ENSG00000111726 |            | 0.16363636 |            | 0.163636364 |             |           | 0.494186  |
| ENSG00000127554 |            | 0.25304878 |            | 0.25304878  |             |           |           |
| ENSG00000131864 |            | 0.48170732 |            | 0.481707317 |             |           | 0.2383721 |
| ENSG00000163517 |            |            |            |             |             |           | 0.0609756 |
| ENSG00000197535 | 0.32035928 | 0.37804878 | 0.32035928 | 0.37804878  |             |           | 0.2616279 |
| ENSG00000178878 |            | 0.39090909 |            | 0.390909091 |             |           | 0.3372093 |
| ENSG00000115607 | 0.18484848 | 0.19090909 | 0.18484848 | 0.190909091 |             |           | 0.4117647 |
| ENSG00000198783 |            | 0.4        |            | 0.4         |             |           | 0.2289157 |
| ENSG00000123384 |            | 0.24242424 |            | 0.242424242 |             |           | 0.1627907 |
| ENSG00000144668 |            | 0.39329268 |            | 0.393292683 |             |           | 0.4651163 |
| ENSG00000164631 |            | 0.14848485 |            | 0.148484848 |             |           |           |
| ENSG00000138375 |            |            |            |             | 0.198795181 | 0.3197674 |           |
| ENSG00000173548 |            | 0.3445122  |            | 0.344512195 |             |           | 0.4825581 |

|                 |            |            |            |             |             |  |           |           |
|-----------------|------------|------------|------------|-------------|-------------|--|-----------|-----------|
| ENSG0000024482  |            | 0.25       |            | 0.25        |             |  |           | 0.4047619 |
| ENSG00000130201 |            | 0.38787879 |            | 0.387878788 |             |  |           | 0.1569767 |
| ENSG00000138430 |            | 0.45151515 |            | 0.451515152 |             |  |           | 0.3352941 |
| ENSG00000163393 |            | 0.23033708 |            | 0.230337079 |             |  |           | 0.2386364 |
| ENSG00000143337 |            | 0.46666667 |            | 0.466666667 |             |  |           | 0.2705882 |
| ENSG00000130720 |            | 0.44207317 |            | 0.442073171 |             |  |           | 0.4709302 |
| ENSG00000144369 |            | 0.25       |            | 0.25        |             |  |           | 0.2380952 |
| ENSG00000107611 |            | 0.32121212 |            | 0.321212121 |             |  |           | 0.4651163 |
| ENSG00000257335 | 0.25       |            | 0.25       |             | 0.277777778 |  | 0.3409091 |           |
| ENSG00000106341 | 0.17771084 | 0.27777778 | 0.17771084 | 0.27777778  | 0.476190476 |  | 0.4651163 | 0.2906977 |
| ENSG00000186591 | 0.48235294 | 0.15       | 0.48235294 | 0.15        |             |  |           | 0.1590909 |
| ENSG00000173757 |            |            |            |             |             |  |           | 0.0581395 |
| ENSG00000213366 | 0.21987952 |            | 0.21987952 |             |             |  |           |           |
| ENSG00000181019 | 0.21666667 | 0.09509202 | 0.21666667 | 0.095092025 |             |  |           | 0.3529412 |
| ENSG00000143498 | 0.41616766 |            | 0.41616766 |             | 0.113095238 |  | 0.122093  |           |
| ENSG00000198561 | 0.40718563 | 0.3        | 0.40718563 | 0.3         | 0.113095238 |  | 0.1046512 | 0.0930233 |
| ENSG00000119242 | 0.42215569 | 0.37878788 | 0.42215569 | 0.378787879 | 0.101190476 |  | 0.1337209 | 0.2034884 |
| ENSG00000145321 | 0.26347305 | 0.42378049 | 0.26347305 | 0.423780488 | 0.379518072 |  | 0.3313953 | 0.244186  |
| ENSG00000176007 | 0.28378378 |            | 0.28378378 |             | 0.407894737 |  | 0.3780488 | 0.3176471 |
| ENSG00000117322 | 0.07692308 | 0.19393939 | 0.07692308 | 0.193939394 | 0.071428571 |  | 0.1097561 |           |
| ENSG00000101665 |            |            |            |             |             |  |           | 0.1744186 |
| ENSG00000198743 |            | 0.34146341 |            | 0.341463415 |             |  |           | 0.4651163 |
| ENSG00000122545 |            | 0.37195122 |            | 0.37195122  |             |  |           | 0.4411765 |
| ENSG00000183770 |            |            |            |             |             |  |           | 0.0813953 |
| ENSG00000110696 | 0.13636364 | 0.44785276 | 0.13636364 | 0.447852761 | 0.188888889 |  | 0.0909091 | 0.0523256 |
| ENSG00000179348 | 0.44186047 | 0.21472393 | 0.44186047 | 0.214723926 | 0.188888889 |  | 0.1704545 | 0.0783133 |
| ENSG00000006074 |            | 0.36666667 |            | 0.366666667 |             |  |           | 0.3255814 |
| ENSG00000126012 |            |            |            |             |             |  |           | 0.3197674 |
| ENSG00000109689 |            | 0.0872093  |            | 0.087209302 |             |  |           | 0.3       |
| ENSG00000214376 |            | 0.13888889 |            | 0.138888889 |             |  |           | 0.4767442 |
| ENSG00000189337 |            | 0.43939394 |            | 0.439393939 |             |  |           | 0.2616279 |
| ENSG00000091651 |            |            |            |             | 0.06547619  |  |           |           |
| ENSG00000168092 |            | 0.15454545 |            | 0.154545455 |             |  |           | 0.494186  |
| ENSG00000196136 | 0.45508982 |            | 0.45508982 |             | 0.333333333 |  | 0.4244186 |           |
| ENSG00000163995 |            | 0.26060606 |            | 0.260606061 |             |  |           | 0.4772727 |
| ENSG00000054118 |            | 0.07012195 |            | 0.070121951 |             |  |           |           |
| ENSG00000128272 | 0.0748503  |            | 0.0748503  |             |             |  |           |           |
| ENSG00000187955 |            | 0.43636364 |            | 0.436363636 |             |  |           | 0.372093  |
| ENSG00000163098 | 0.16060606 |            | 0.16060606 |             | 0.307228916 |  | 0.3392857 |           |
| ENSG00000134954 |            | 0.49390244 |            | 0.493902439 |             |  |           | 0.4709302 |
| ENSG00000017427 |            | 0.41818182 |            | 0.418181818 |             |  |           | 0.494186  |
| ENSG00000173040 |            | 0.27575758 |            | 0.275757576 |             |  |           | 0.4593023 |
| ENSG00000160208 |            | 0.41104294 |            | 0.411042945 |             |  |           | 0.1686047 |
| ENSG00000075089 |            |            |            |             | 0.055555556 |  |           |           |
| ENSG00000074695 |            | 0.27439024 |            | 0.274390244 |             |  |           | 0.4709302 |
| ENSG00000141574 |            | 0.49350649 |            | 0.493506494 |             |  |           |           |
| ENSG00000205835 |            | 0.3597561  |            | 0.359756098 |             |  |           | 0.4117647 |
| ENSG00000180871 | 0.12349398 | 0.46969697 | 0.12349398 | 0.46969697  | 0.357142857 |  | 0.3139535 | 0.3139535 |
| ENSG00000104237 | 0.09444444 |            | 0.09444444 |             |             |  |           |           |
| ENSG00000153822 |            | 0.09090909 |            | 0.090909091 |             |  |           |           |
| ENSG00000049192 |            | 0.08787879 |            | 0.087878788 |             |  |           | 0.0639535 |
| ENSG00000213799 |            | 0.08988764 |            | 0.08988764  |             |  |           | 0.0681818 |
| ENSG00000184897 | 0.29411765 | 0.10465116 | 0.29411765 | 0.104651163 |             |  |           |           |
| ENSG00000214114 | 0.11676647 | 0.12121212 | 0.11676647 | 0.121212121 | 0.303571429 |  | 0.244186  | 0.3488372 |

|                 |            |            |            |             |             |           |                     |
|-----------------|------------|------------|------------|-------------|-------------|-----------|---------------------|
| ENSG00000257315 | 0.41916168 |            | 0.41916168 |             | 0.321428571 |           | 0.3662791           |
| ENSG00000115216 | 0.25555556 |            | 0.25555556 |             | 0.144444444 |           | 0.0930233           |
| ENSG00000225885 |            |            |            |             |             |           | 0.4545455           |
| ENSG00000134824 | 0.31437126 | 0.34242424 | 0.31437126 | 0.34242424  |             |           | 0.3081395           |
| ENSG00000166192 |            | 0.22121212 |            | 0.22121212  |             |           | 0.3546512           |
| ENSG00000170624 | 0.18965517 | 0.41818182 | 0.18965517 | 0.41818182  | 0.193181818 |           | 0.1555556 0.1904762 |
| ENSG00000157211 | 0.24850299 |            | 0.24850299 |             | 0.303571429 |           | 0.3488372           |
| ENSG00000172752 | 0.40555556 |            | 0.40555556 |             | 0.333333333 |           | 0.1704545           |
| ENSG00000113522 | 0.24550898 |            | 0.24550898 |             |             |           |                     |
| ENSG00000114544 |            | 0.14444444 |            | 0.14444444  |             |           | 0.1666667           |
| ENSG00000160781 | 0.12874251 | 0.31515152 | 0.12874251 | 0.31515152  | 0.18452381  | 0.372093  | 0.255814            |
| ENSG00000124557 |            | 0.48181818 |            | 0.48181818  |             |           | 0.2891566           |
| ENSG00000163285 |            | 0.49085366 |            | 0.490853659 |             |           | 0.2590361           |
| ENSG00000114166 |            | 0.2030303  |            | 0.203030303 |             |           | 0.4294118           |
| ENSG00000115520 |            | 0.17682927 |            | 0.176829268 |             |           | 0.172619            |
| ENSG00000198604 |            | 0.15151515 |            | 0.151515152 |             |           | 0.1860465           |
| ENSG00000198915 |            | 0.16770186 |            | 0.167701863 | 0.444444444 | 0.4777778 | 0.4166667           |
| ENSG00000137814 |            | 0.24233129 |            | 0.242331288 |             |           | 0.2857143           |
| ENSG00000085382 |            | 0.11515152 |            | 0.115151515 |             |           |                     |
| ENSG00000162729 |            | 0.15454545 |            | 0.154545455 |             |           | 0.0523256           |
| ENSG00000112992 |            | 0.19393939 |            | 0.193939394 | 0.06547619  | 0.1395349 | 0.1588235           |
| ENSG00000110583 | 0.08682635 | 0.44848485 | 0.08682635 | 0.448484848 | 0.05625     | 0.0882353 | 0.1411765           |
| ENSG00000119138 | 0.08982036 | 0.43333333 | 0.08982036 | 0.433333333 | 0.154761905 | 0.1744186 | 0.2151163           |
| ENSG00000158481 | 0.1497006  | 0.11818182 | 0.1497006  | 0.118181818 |             |           | 0.3081395           |
| ENSG00000137745 |            | 0.06060606 |            | 0.060606061 |             |           |                     |
| ENSG00000167332 |            | 0.13218391 |            | 0.132183908 |             |           | 0.2045455           |
| ENSG00000139597 |            | 0.1097561  |            | 0.109756098 |             |           | 0.4534884           |
| ENSG00000064763 |            | 0.45757576 |            | 0.457575758 |             |           | 0.3837209           |
| ENSG00000196357 | 0.19760479 | 0.07777778 | 0.19760479 | 0.07777778  |             |           |                     |
| ENSG00000251349 |            | 0.05       |            | 0.05        |             |           | 0.1704545           |
| ENSG00000063046 | 0.45508982 | 0.12804878 | 0.45508982 | 0.12804878  | 0.19047619  | 0.2325581 | 0.3647059           |
| ENSG00000151364 |            | 0.15757576 |            | 0.157575758 |             |           | 0.4418605           |
| ENSG00000131127 | 0.45209581 | 0.41111111 | 0.45209581 | 0.411111111 | 0.411111111 | 0.3522727 | 0.3292683           |
| ENSG00000106003 |            | 0.06060606 |            | 0.060606061 |             |           |                     |
| ENSG00000139567 |            | 0.2962963  |            | 0.296296296 |             |           | 0.3076923           |
| ENSG00000168779 |            | 0.36666667 |            | 0.366666667 |             |           | 0.494186            |
| ENSG00000143870 | 0.39520958 | 0.06111111 | 0.39520958 | 0.061111111 | 0.178571429 | 0.1860465 |                     |
| ENSG00000129250 |            | 0.17777778 |            | 0.17777778  |             |           | 0.4333333           |
| ENSG00000141027 |            | 0.4969697  |            | 0.496969697 |             |           | 0.1976744           |
| ENSG00000138496 |            | 0.43333333 |            | 0.433333333 |             |           | 0.3488372           |
| ENSG00000126822 | 0.09146341 | 0.10606061 | 0.09146341 | 0.106060606 |             |           |                     |
| ENSG00000198125 |            | 0.10060976 |            | 0.100609756 | 0.071428571 | 0.1       | 0.0639535           |
| ENSG00000148019 |            | 0.5        |            | 0.5         |             |           | 0.3139535           |
| ENSG00000221837 |            | 0.25568182 |            | 0.255681818 |             |           | 0.4888889           |
| ENSG00000171533 |            | 0.40853659 |            | 0.408536585 |             |           | 0.4117647           |
| ENSG00000112530 |            | 0.47560976 |            | 0.475609756 | 0.44047619  | 0.4588235 | 0.2764706           |
| ENSG00000177694 |            | 0.30487805 |            | 0.304878049 |             |           | 0.304878            |
| ENSG00000177946 | 0.18263473 |            | 0.18263473 |             |             |           |                     |
| ENSG00000175600 |            | 0.43939394 |            | 0.439393939 |             |           | 0.2209302           |
| ENSG00000100360 | 0.40718563 |            | 0.40718563 |             |             |           |                     |
| ENSG00000174928 |            | 0.38181818 |            | 0.381818182 |             |           | 0.3214286           |
| ENSG00000122862 |            | 0.08231707 |            | 0.082317073 |             |           | 0.4825581           |
| ENSG00000101294 |            | 0.14848485 |            | 0.148484848 |             |           |                     |
| ENSG00000153391 |            | 0.31212121 |            | 0.312121212 |             |           |                     |



|                 |            |            |            |             |             |  |           |           |
|-----------------|------------|------------|------------|-------------|-------------|--|-----------|-----------|
| ENSG00000179213 | 0.17065868 |            | 0.17065868 |             | 0.494047619 |  | 0.3895349 |           |
| ENSG00000197892 |            | 0.35365854 |            | 0.353658537 |             |  |           | 0.4333333 |
| ENSG00000173464 | 0.4011976  | 0.34242424 | 0.4011976  | 0.342424242 | 0.363095238 |  | 0.3895349 | 0.4476744 |
| ENSG0000044459  |            | 0.22777778 |            | 0.227777778 |             |  |           | 0.1823529 |
| ENSG00000221852 |            | 0.3030303  |            | 0.303030303 |             |  |           | 0.2965116 |
| ENSG00000159314 |            | 0.40606061 |            | 0.406060606 |             |  |           | 0.4302326 |
| ENSG00000147853 | 0.34659091 | 0.47777778 | 0.34659091 | 0.477777778 | 0.311111111 |  | 0.3139535 | 0.2954545 |
| ENSG00000139112 | 0.35329341 | 0.20606061 | 0.35329341 | 0.206060606 | 0.444444444 |  | 0.4777778 | 0.4777778 |
| ENSG00000119318 |            | 0.10670732 |            | 0.106707317 |             |  | 0.0666667 |           |
| ENSG00000120696 |            | 0.1030303  |            | 0.103030303 | 0.4         |  | 0.5       |           |
| ENSG00000079102 |            | 0.48314607 |            | 0.483146067 |             |  |           | 0.1918605 |
| ENSG00000237541 | 0.31578947 | 0.47878788 | 0.31578947 | 0.478787879 |             |  |           | 0.3255814 |
| ENSG00000127920 | 0.37735849 |            | 0.37735849 |             | 0.226190476 |  | 0.2209302 |           |
| ENSG00000079691 | 0.46407186 |            | 0.46407186 |             | 0.357142857 |  | 0.2965116 |           |
| ENSG00000117983 | 0.40555556 |            | 0.40555556 |             | 0.411111111 |  | 0.4819277 |           |
| ENSG00000128829 |            | 0.15151515 |            | 0.151515152 |             |  |           | 0.3953488 |
| ENSG00000161040 |            | 0.3        |            | 0.3         |             |  |           | 0.445122  |
| ENSG00000136270 |            | 0.25786164 |            | 0.257861635 |             |  |           | 0.1686747 |
| ENSG00000170899 |            | 0.48888889 |            | 0.488888889 |             |  |           | 0.2352941 |
| ENSG00000034677 | 0.08888889 |            | 0.08888889 |             |             |  |           |           |
| ENSG00000006744 |            | 0.40243902 |            | 0.402439024 |             |  |           | 0.4186047 |
| ENSG00000169136 | 0.13772455 | 0.37878788 | 0.13772455 | 0.378787879 |             |  |           | 0.4390244 |
| ENSG00000166793 | 0.23952096 |            | 0.23952096 |             |             |  |           |           |
| ENSG00000120549 | 0.31927711 |            | 0.31927711 |             | 0.233333333 |  | 0.1333333 |           |
| ENSG00000092098 | 0.42215569 |            | 0.42215569 |             | 0.439759036 |  | 0.4244186 | 0.2       |
| ENSG00000118997 | 0.15243902 |            | 0.15243902 |             |             |  |           |           |
| ENSG00000213988 |            |            |            |             |             |  |           | 0.4204545 |
| ENSG00000150961 | 0.25449102 | 0.4030303  | 0.25449102 | 0.403030303 | 0.476190476 |  | 0.4593023 | 0.4593023 |
| ENSG00000153767 | 0.20658683 | 0.41111111 | 0.20658683 | 0.411111111 | 0.446428571 |  | 0.4825581 | 0.1931818 |
| ENSG00000138031 | 0.2754491  | 0.10493827 | 0.2754491  | 0.104938272 | 0.261904762 |  | 0.2906977 |           |
| ENSG00000175387 |            | 0.49390244 |            | 0.493902439 |             |  |           | 0.3522727 |
| ENSG00000116678 | 0.16566265 | 0.3404908  | 0.16566265 | 0.340490798 | 0.19375     |  | 0.2256098 | 0.2674419 |
| ENSG00000166275 |            | 0.34545455 |            | 0.345454545 |             |  |           | 0.4593023 |
| ENSG00000172482 |            | 0.5        |            | 0.5         |             |  |           | 0.255814  |
| ENSG00000242372 | 0.05988024 | 0.2625     | 0.05988024 | 0.2625      |             |  | 0.0872093 | 0.1410256 |
| ENSG00000231738 | 0.13473054 |            | 0.13473054 |             | 0.375       |  | 0.3372093 |           |
| ENSG00000165972 | 0.14204545 | 0.36363636 | 0.14204545 | 0.363636364 | 0.111111111 |  | 0.0681818 | 0.2383721 |
| ENSG00000176087 | 0.47305389 | 0.25304878 | 0.47305389 | 0.25304878  | 0.142857143 |  | 0.2209302 | 0.2209302 |
| ENSG00000197046 |            | 0.16666667 |            | 0.166666667 |             |  |           | 0.3977273 |
| ENSG00000149927 |            | 0.12777778 |            | 0.127777778 |             |  |           |           |
| ENSG00000253857 | 0.06321839 | 0.25454545 | 0.06321839 | 0.254545455 | 0.1         |  |           | 0.2732558 |
| ENSG00000111245 | 0.15568862 |            | 0.15568862 |             |             |  |           |           |
| ENSG00000129083 | 0.21590909 |            | 0.21590909 |             | 0.284090909 |  | 0.3522727 |           |
| ENSG00000108963 |            | 0.16363636 |            | 0.163636364 |             |  |           |           |
| ENSG00000101230 |            | 0.13414634 |            | 0.134146341 |             |  |           | 0.255814  |
| ENSG00000172939 |            | 0.34242424 |            | 0.342424242 |             |  |           | 0.244186  |
| ENSG00000124784 | 0.46407186 |            | 0.46407186 |             | 0.488095238 |  | 0.4772727 |           |
| ENSG00000167914 | 0.44011976 | 0.16969697 | 0.44011976 | 0.16969697  | 0.482142857 |  | 0.4593023 | 0.127907  |
| ENSG00000182674 | 0.42215569 |            | 0.42215569 |             | 0.410714286 |  | 0.3081395 |           |
| ENSG00000137558 |            | 0.44207317 |            | 0.442073171 |             |  |           |           |
| ENSG00000184182 | 0.22289157 | 0.37878788 | 0.22289157 | 0.378787879 | 0.410714286 |  | 0.4418605 | 0.2034884 |
| ENSG00000203786 |            | 0.11515152 |            | 0.115151515 |             |  |           | 0.2848837 |
| ENSG00000198721 | 0.15568862 | 0.37575758 | 0.15568862 | 0.375757576 |             |  |           | 0.2771084 |
| ENSG00000003147 | 0.25748503 | 0.15853659 | 0.25748503 | 0.158536585 | 0.428571429 |  | 0.4647059 | 0.2034884 |

|                 |            |            |            |             |             |           |           |
|-----------------|------------|------------|------------|-------------|-------------|-----------|-----------|
| ENSG00000107957 |            | 0.43636364 |            | 0.436363636 |             |           | 0.494186  |
| ENSG00000160345 | 0.37724551 |            | 0.37724551 |             | 0.172619048 |           | 0.1569767 |
| ENSG00000137411 | 0.11377246 |            | 0.11377246 |             | 0.291666667 |           | 0.2034884 |
| ENSG00000159958 |            | 0.24545455 |            | 0.245454545 |             |           | 0.1162791 |
| ENSG00000234224 |            | 0.25555556 |            | 0.255555556 |             |           |           |
| ENSG00000138399 | 0.07777778 | 0.08181818 | 0.07777778 | 0.081818182 | 0.196428571 | 0.2764706 | 0.255814  |
| ENSG00000104976 |            | 0.27272727 |            | 0.272727273 |             |           | 0.4360465 |
| ENSG00000112276 |            | 0.13939394 |            | 0.139393939 |             |           | 0.1511628 |
| ENSG00000165388 |            | 0.22121212 |            | 0.221212121 |             |           | 0.2209302 |
| ENSG00000136643 | 0.13125    |            | 0.13125    |             | 0.409090909 | 0.3444444 |           |
| ENSG00000106069 | 0.42814371 | 0.3        | 0.42814371 | 0.3         | 0.404761905 | 0.372093  | 0.3470588 |
| ENSG00000117298 |            | 0.13939394 |            | 0.139393939 |             |           | 0.2613636 |
| ENSG00000178031 |            | 0.42424242 |            | 0.424242424 |             |           | 0.3372093 |
| ENSG00000188897 | 0.13473054 |            | 0.13473054 |             | 0.452380952 | 0.4709302 |           |
| ENSG00000169188 | 0.06287425 | 0.24848485 | 0.06287425 | 0.248484848 |             |           | 0.4705882 |
| ENSG00000153936 | 0.49090909 | 0.34242424 | 0.49090909 | 0.342424242 | 0.054216867 |           | 0.195122  |
| ENSG00000114670 |            | 0.26363636 |            | 0.263636364 |             |           | 0.4360465 |
| ENSG00000171148 |            | 0.16666667 |            | 0.166666667 |             |           | 0.4886364 |
| ENSG00000163191 | 0.11445783 |            | 0.11445783 |             |             |           |           |
| ENSG00000176532 | 0.35454545 | 0.18181818 | 0.35454545 | 0.181818182 | 0.494047619 | 0.4709302 |           |
| ENSG00000196584 | 0.09444444 |            | 0.09444444 |             | 0.154761905 |           | 0.2       |
| ENSG00000166866 |            | 0.07272727 |            | 0.072727273 | 0.122222222 | 0.0697674 | 0.0988372 |
| ENSG00000134249 | 0.41666667 |            | 0.41666667 |             |             |           |           |
| ENSG00000023902 |            |            |            |             | 0.056818182 | 0.0909091 |           |
| ENSG00000205581 | 0.47191011 |            | 0.47191011 |             | 0.233333333 | 0.1590909 |           |
| ENSG00000101546 |            | 0.37272727 |            | 0.372727273 |             |           | 0.4318182 |
| ENSG00000110844 |            | 0.1091954  |            | 0.109195402 |             |           | 0.0697674 |
| ENSG00000140750 |            | 0.09393939 |            | 0.093939394 |             |           |           |
| ENSG00000162999 |            | 0.38181818 |            | 0.381818182 |             |           | 0.1104651 |
| ENSG00000070718 | 0.45481928 | 0.43636364 | 0.45481928 | 0.436363636 | 0.470238095 | 0.4534884 | 0.4534884 |
| ENSG00000249868 | 0.23053892 |            | 0.23053892 |             | 0.267857143 | 0.2790698 |           |
| ENSG00000149054 | 0.33641975 | 0.40993789 | 0.33641975 | 0.409937888 | 0.482142857 | 0.4883721 | 0.3662791 |
| ENSG00000188175 |            | 0.27777778 |            | 0.277777778 |             |           | 0.3409091 |
| ENSG00000112576 |            | 0.31212121 |            | 0.312121212 | 0.446428571 | 0.4       | 0.2383721 |
| ENSG00000125869 | 0.35329341 |            | 0.35329341 |             | 0.166666667 | 0.1686047 |           |
| ENSG00000173567 |            | 0.35057471 |            | 0.350574713 |             |           | 0.2045455 |
| ENSG00000108878 |            | 0.47575758 |            | 0.475757576 |             |           | 0.1802326 |
| ENSG00000150556 | 0.35628743 |            | 0.35628743 |             | 0.126506024 | 0.2267442 |           |
| ENSG00000075702 |            | 0.1969697  |            | 0.196969697 |             |           | 0.1918605 |
| ENSG00000188997 |            | 0.47878788 |            | 0.478787879 |             |           | 0.4825581 |
| ENSG00000127366 | 0.20958084 |            | 0.20958084 |             | 0.31547619  | 0.2848837 |           |
| ENSG00000122678 |            | 0.21515152 |            | 0.215151515 |             |           | 0.1104651 |
| ENSG00000185049 |            | 0.14606742 |            | 0.146067416 |             |           | 0.4069767 |
| ENSG00000005893 |            | 0.44785276 |            | 0.447852761 |             |           | 0.2882353 |
| ENSG00000160886 | 0.31666667 | 0.43333333 | 0.31666667 | 0.433333333 | 0.444444444 | 0.3636364 | 0.3139535 |
| ENSG00000143514 |            | 0.15454545 |            | 0.154545455 |             |           | 0.2916667 |
| ENSG00000143001 | 0.34444444 | 0.16363636 | 0.34444444 | 0.163636364 | 0.5         | 0.4318182 | 0.1976744 |
| ENSG00000124459 |            | 0.44848485 |            | 0.448484848 |             |           | 0.1931818 |
| ENSG00000159479 |            | 0.43258427 |            | 0.43258427  |             |           | 0.1363636 |
| ENSG00000102977 | 0.33532934 |            | 0.33532934 |             |             |           |           |
| ENSG00000118640 |            | 0.44545455 |            | 0.445454545 | 0.055555556 |           | 0.4069767 |
| ENSG00000178235 |            |            |            |             |             |           | 0.0755814 |
| ENSG00000092969 |            | 0.2125     |            | 0.2125      |             |           | 0.3170732 |
| ENSG00000188474 | 0.0625     | 0.05487805 | 0.0625     | 0.054878049 |             |           |           |

|                 |            |            |            |             |             |           |           |
|-----------------|------------|------------|------------|-------------|-------------|-----------|-----------|
| ENSG00000108946 | 0.30538922 | 0.26666667 | 0.30538922 | 0.26666667  |             |           | 0.4886364 |
| ENSG00000159708 | 0.29444444 |            | 0.29444444 |             |             |           |           |
| ENSG0000043039  | 0.44610778 | 0.34259259 | 0.44610778 | 0.34259259  | 0.482142857 |           | 0.4534884 |
| ENSG00000125657 |            | 0.45151515 |            | 0.45151515  |             |           | 0.3488372 |
| ENSG00000061794 |            | 0.15151515 |            | 0.15151515  |             |           | 0.1918605 |
| ENSG00000227124 | 0.15730337 | 0.36969697 | 0.15730337 | 0.36969697  | 0.154761905 | 0.0888889 | 0.5       |
| ENSG00000011485 |            | 0.43333333 |            | 0.43333333  | 0.44047619  | 0.2790698 | 0.3705882 |
| ENSG00000128534 | 0.27245509 | 0.32727273 | 0.27245509 | 0.32727273  | 0.297619048 | 0.1785714 | 0.1569767 |
| ENSG00000111837 |            | 0.16363636 |            | 0.16363636  |             |           | 0.0639535 |
| ENSG00000244623 |            | 0.43865031 |            | 0.438650307 |             |           | 0.2616279 |
| ENSG00000162888 |            |            |            |             |             |           | 0.375     |
| ENSG00000171097 | 0.07272727 | 0.18787879 | 0.07272727 | 0.187878788 |             | 0.0705882 | 0.2093023 |
| ENSG00000188223 |            | 0.1125     |            | 0.1125      |             |           | 0.244186  |
| ENSG00000139973 | 0.25555556 | 0.06969697 | 0.25555556 | 0.06969697  | 0.16666667  | 0.1136364 | 0.0639535 |
| ENSG00000176678 |            | 0.06969697 |            | 0.06969697  |             |           |           |
| ENSG00000104804 | 0.47005988 |            | 0.47005988 |             | 0.170731707 | 0.3809524 |           |
| ENSG00000184304 | 0.35555556 | 0.46060606 | 0.35555556 | 0.460606061 | 0.077777778 | 0.0555556 | 0.2440476 |
| ENSG00000169684 |            | 0.36060606 |            | 0.360606061 |             |           | 0.1511628 |
| ENSG00000130176 | 0.28742515 |            | 0.28742515 |             | 0.130952381 | 0.0813953 |           |
| ENSG00000167986 | 0.23214286 |            | 0.23214286 |             |             |           |           |
| ENSG00000139155 |            | 0.47272727 |            | 0.472727273 |             |           | 0.3522727 |
| ENSG00000163682 | 0.43181818 |            | 0.43181818 |             | 0.1         | 0.0568182 |           |
| ENSG00000100325 |            | 0.48484848 |            | 0.484848485 |             |           | 0.4767442 |
| ENSG00000165949 | 0.48802395 |            | 0.48802395 |             | 0.458333333 | 0.4302326 | 0.4069767 |
| ENSG00000089818 |            | 0.278125   |            | 0.278125    |             |           | 0.4464286 |
| ENSG00000137727 | 0.44610778 | 0.45757576 | 0.44610778 | 0.457575758 | 0.279761905 | 0.1453488 | 0.4360465 |
| ENSG00000070748 | 0.38719512 |            | 0.38719512 |             | 0.321428571 | 0.4825581 |           |
| ENSG00000148082 | 0.1746988  |            | 0.1746988  |             |             |           |           |
| ENSG00000160131 |            | 0.47239264 |            | 0.472392638 |             |           | 0.0666667 |
| ENSG00000119004 |            | 0.48148148 |            | 0.481481481 |             |           | 0.2906977 |
| ENSG00000206561 |            | 0.40606061 |            | 0.406060606 |             |           | 0.4883721 |
| ENSG00000172115 |            | 0.26404494 |            | 0.264044944 |             |           | 0.4709302 |
| ENSG00000213694 | 0.32934132 | 0.23333333 | 0.32934132 | 0.233333333 | 0.18452381  | 0.2093023 | 0.0930233 |
| ENSG00000198682 |            | 0.29090909 |            | 0.290909091 |             |           | 0.1445783 |
| ENSG00000167384 |            | 0.07575758 |            | 0.075757576 |             |           | 0.3895349 |
| ENSG00000124496 | 0.24850299 | 0.33333333 | 0.24850299 | 0.333333333 |             |           | 0.1802326 |
| ENSG00000176396 |            | 0.32317073 |            | 0.323170732 |             |           | 0.1569767 |
| ENSG00000122223 | 0.28742515 | 0.47575758 | 0.28742515 | 0.475757576 | 0.357142857 | 0.3372093 | 0.3888889 |
| ENSG00000184900 |            | 0.11212121 |            | 0.112121212 |             |           |           |
| ENSG00000099256 |            | 0.37272727 |            | 0.372727273 |             |           | 0.1764706 |
| ENSG00000205542 | 0.0813253  |            | 0.0813253  |             |             |           |           |
| ENSG00000133858 | 0.11976048 |            | 0.11976048 |             |             |           |           |
| ENSG00000081189 |            | 0.41463415 |            | 0.414634146 |             |           | 0.494186  |
| ENSG00000131183 |            | 0.37878788 |            | 0.378787879 |             |           | 0.255814  |
| ENSG00000154144 | 0.27743902 | 0.09090909 | 0.27743902 | 0.090909091 |             |           | 0.1627907 |
| ENSG00000185551 |            | 0.19090909 |            | 0.190909091 |             |           | 0.255814  |
| ENSG00000138018 |            | 0.47878788 |            | 0.478787879 |             |           | 0.372093  |
| ENSG00000111897 |            | 0.45341615 |            | 0.453416149 |             |           | 0.439759  |
| ENSG00000101292 | 0.22590361 |            | 0.22590361 |             | 0.19047619  | 0.0872093 | 0.4418605 |
| ENSG00000156273 |            | 0.48787879 |            | 0.487878788 |             |           | 0.4534884 |
| ENSG00000167207 | 0.14156627 | 0.3908046  | 0.14156627 | 0.390804598 |             |           | 0.2261905 |
| ENSG00000151553 |            | 0.44242424 |            | 0.442424242 |             |           | 0.25      |
| ENSG00000101040 |            | 0.39444444 |            | 0.394444444 |             |           | 0.2159091 |
| ENSG00000198556 |            | 0.125      |            | 0.125       |             |           | 0.3294118 |

|                 |            |            |            |             |             |  |                     |
|-----------------|------------|------------|------------|-------------|-------------|--|---------------------|
| ENSG00000144182 | 0.46706587 |            | 0.46706587 |             | 0.10625     |  | 0.1235294           |
| ENSG00000182512 | 0.34638554 | 0.38787879 | 0.34638554 | 0.387878788 | 0.457831325 |  | 0.4883721 0.3372093 |
| ENSG00000197442 | 0.2962963  |            | 0.2962963  |             | 0.409638554 |  | 0.4761905           |
| ENSG00000197020 |            | 0.45555556 |            | 0.455555556 |             |  | 0.4090909           |
| ENSG00000188822 |            | 0.4        |            | 0.4         |             |  | 0.3895349           |
| ENSG00000054690 | 0.43072289 | 0.37575758 | 0.43072289 | 0.375757576 | 0.44047619  |  | 0.4345238 0.4709302 |
| ENSG00000170006 |            | 0.05757576 |            | 0.057575758 |             |  |                     |
| ENSG00000130520 |            | 0.07878788 |            | 0.078787879 |             |  | 0.0581395           |
| ENSG00000138180 |            | 0.24848485 |            | 0.248484848 |             |  | 0.3414634           |
| ENSG00000163430 |            | 0.44848485 |            | 0.448484848 |             |  | 0.3941176           |
| ENSG00000147130 |            | 0.06321839 |            | 0.063218391 |             |  | 0.0909091           |
| ENSG00000154655 |            | 0.5        |            | 0.5         |             |  | 0.4186047           |
| ENSG00000163145 |            | 0.40797546 |            | 0.40797546  |             |  | 0.4111111           |
| ENSG00000197863 | 0.21666667 |            | 0.21666667 |             |             |  |                     |
| ENSG00000213551 | 0.40963855 | 0.05       | 0.40963855 | 0.05        | 0.404761905 |  | 0.4069767 0.3068182 |
| ENSG00000136111 | 0.28888889 | 0.15625    | 0.28888889 | 0.15625     | 0.211111111 |  | 0.3181818 0.2560976 |
| ENSG00000147402 |            | 0.48780488 |            | 0.487804878 |             |  | 0.3139535           |
| ENSG00000180185 |            | 0.16969697 |            | 0.16969697  |             |  | 0.1976744           |
| ENSG00000250120 |            | 0.05151515 |            | 0.051515152 |             |  | 0.1162791           |
| ENSG00000188735 |            | 0.36363636 |            | 0.363636364 |             |  | 0.4883721           |
| ENSG00000134444 |            |            |            |             |             |  | 0.2                 |
| ENSG00000068885 |            | 0.05       |            | 0.05        | 0.05952381  |  |                     |
| ENSG00000155970 |            | 0.45348837 |            | 0.453488372 |             |  | 0.4444444           |
| ENSG00000118096 |            |            |            |             | 0.488095238 |  | 0.4360465           |
| ENSG00000155307 | 0.45398773 | 0.0969697  | 0.45398773 | 0.096969697 | 0.446428571 |  | 0.4823529 0.1686047 |
| ENSG00000182287 |            | 0.43888889 |            | 0.438888889 |             |  | 0.375               |
| ENSG00000226593 | 0.26404494 |            | 0.26404494 |             |             |  | 0.0681818           |
| ENSG00000165934 |            | 0.2        |            | 0.2         | 0.369047619 |  | 0.3546512 0.3470588 |
| ENSG00000131507 |            | 0.37777778 |            | 0.377777778 |             |  | 0.3409091           |
| ENSG00000162746 | 0.36666667 | 0.05757576 | 0.36666667 | 0.057575758 | 0.494047619 |  | 0.3604651 0.2325581 |
| ENSG00000128045 |            | 0.25454545 |            | 0.254545455 |             |  | 0.25                |
| ENSG00000166128 |            | 0.109375   |            | 0.109375    |             |  | 0.4759036           |
| ENSG00000104343 |            | 0.22424242 |            | 0.224242424 |             |  | 0.1046512           |
| ENSG00000125912 |            | 0.43030303 |            | 0.43030303  |             |  | 0.4473684           |
| ENSG00000169877 |            | 0.0969697  |            | 0.096969697 |             |  | 0.0930233           |
| ENSG00000050748 |            | 0.48787879 |            | 0.487878788 |             |  | 0.2732558           |
| ENSG00000198586 |            | 0.26060606 |            | 0.260606061 |             |  | 0.4090909           |
| ENSG00000196187 | 0.20658683 | 0.35057471 | 0.20658683 | 0.350574713 | 0.06626506  |  | 0.1294118 0.2954545 |
| ENSG00000137834 | 0.17964072 |            | 0.17964072 |             | 0.232142857 |  | 0.1860465 0.1931818 |
| ENSG00000168658 | 0.24251497 | 0.5        | 0.24251497 | 0.5         | 0.130952381 |  | 0.1627907 0.244186  |
| ENSG00000164929 |            | 0.20731707 |            | 0.207317073 |             |  | 0.0639535           |
| ENSG00000153048 |            | 0.4030303  |            | 0.403030303 |             |  | 0.5                 |
| ENSG00000116726 |            | 0.18484848 |            | 0.184848485 |             |  | 0.3081395           |
| ENSG00000170290 | 0.29518072 |            | 0.29518072 |             | 0.321428571 |  | 0.3895349           |
| ENSG00000148842 |            | 0.35227273 |            | 0.352272727 |             |  | 0.1022727           |
| ENSG00000179071 |            | 0.4068323  |            | 0.406832298 | 0.066666667 |  | 0.1627907 0.4518072 |
| ENSG00000164411 |            | 0.45731707 |            | 0.457317073 |             |  | 0.4883721           |
| ENSG00000163795 |            | 0.40606061 |            | 0.406060606 |             |  | 0.0988372           |
| ENSG00000105072 | 0.22727273 | 0.34242424 | 0.22727273 | 0.342424242 | 0.288888889 |  | 0.2674419 0.1104651 |
| ENSG00000175267 | 0.43333333 | 0.24846626 | 0.43333333 | 0.248466258 | 0.384146341 |  | 0.4883721 0.1529412 |
| ENSG00000181609 |            |            |            |             |             |  | 0.127907            |
| ENSG00000197150 |            | 0.43636364 |            | 0.436363636 |             |  | 0.3197674           |
| ENSG00000162576 | 0.32831325 | 0.09119497 | 0.32831325 | 0.091194969 | 0.142857143 |  | 0.2261905 0.255814  |
| ENSG00000081277 | 0.05555556 | 0.18484848 | 0.05555556 | 0.184848485 | 0.077777778 |  | 0.1588235           |



|                 |            |            |            |             |             |           |           |
|-----------------|------------|------------|------------|-------------|-------------|-----------|-----------|
| ENSG00000154016 |            | 0.17241379 |            | 0.172413793 |             |           | 0.375     |
| ENSG00000228998 |            | 0.26969697 |            | 0.26969697  |             |           | 0.3662791 |
| ENSG00000139946 | 0.09281437 | 0.49056604 | 0.09281437 | 0.490566038 | 0.162650602 | 0.1162791 | 0.4666667 |
| ENSG00000122254 |            | 0.40606061 |            | 0.406060606 |             |           | 0.4534884 |
| ENSG00000150637 |            | 0.49393939 |            | 0.493939394 |             |           | 0.3488372 |
| ENSG00000205212 |            | 0.21348315 |            | 0.213483146 |             |           | 0.2777778 |
| ENSG00000151812 | 0.47904192 | 0.39240506 | 0.47904192 | 0.392405063 | 0.363095238 | 0.2906977 | 0.4647059 |
| ENSG00000135931 | 0.26646707 | 0.32121212 | 0.26646707 | 0.321212121 | 0.136904762 | 0.1802326 | 0.1569767 |
| ENSG00000100721 |            |            |            |             |             |           | 0.1395349 |
| ENSG00000126522 | 0.08383234 | 0.08227848 | 0.08383234 | 0.082278481 | 0.172619048 | 0.1686047 | 0.1647059 |
| ENSG00000181800 |            | 0.46666667 |            | 0.466666667 |             |           | 0.2906977 |
| ENSG00000158882 | 0.06287425 |            | 0.06287425 |             | 0.494047619 | 0.4593023 |           |
| ENSG00000181333 |            | 0.32727273 |            | 0.327272727 |             |           | 0.3235294 |
| ENSG00000177042 |            | 0.47484277 |            | 0.474842767 |             |           | 0.4235294 |
| ENSG00000170759 |            | 0.27160494 |            | 0.271604938 |             |           |           |
| ENSG00000241043 |            | 0.38202247 |            | 0.382022472 |             |           | 0.3170732 |
| ENSG00000104783 |            | 0.20606061 |            | 0.206060606 |             |           | 0.0930233 |
| ENSG00000115286 | 0.29341317 | 0.36363636 | 0.29341317 | 0.363636364 | 0.31547619  | 0.4235294 | 0.4176471 |
| ENSG00000185245 | 0.25903614 |            | 0.25903614 |             | 0.210843373 | 0.2647059 | 0.0639535 |
| ENSG00000188786 |            | 0.23595506 |            | 0.235955056 |             |           | 0.3488372 |
| ENSG00000179820 |            | 0.08333333 |            | 0.083333333 |             |           |           |
| ENSG00000163866 |            | 0.07272727 |            | 0.072727273 |             |           | 0.122093  |
| ENSG00000221818 |            | 0.45757576 |            | 0.457575758 |             |           | 0.2529412 |
| ENSG00000189292 |            | 0.38484848 |            | 0.384848485 |             |           | 0.4011628 |
| ENSG00000255835 |            |            |            |             |             |           | 0.2727273 |
| ENSG00000137767 | 0.0508982  |            | 0.0508982  |             |             |           |           |
| ENSG00000146839 | 0.22754491 | 0.4        | 0.22754491 | 0.4         | 0.464285714 | 0.4352941 |           |
| ENSG00000171786 |            | 0.39634146 |            | 0.396341463 |             |           | 0.4767442 |
| ENSG00000139194 |            | 0.09659091 |            | 0.096590909 |             |           |           |
| ENSG00000158714 | 0.05688623 | 0.14545455 | 0.05688623 | 0.145454545 |             |           |           |
| ENSG00000196946 |            | 0.46060606 |            | 0.460606061 |             |           | 0.4302326 |
| ENSG00000133106 | 0.31437126 | 0.49390244 | 0.31437126 | 0.493902439 | 0.475903614 | 0.4529412 | 0.4302326 |
| ENSG00000171596 |            | 0.30909091 |            | 0.309090909 |             |           | 0.4709302 |
| ENSG00000131467 | 0.1257485  |            | 0.1257485  |             |             |           |           |
| ENSG00000256713 |            |            |            |             |             |           | 0.0555556 |
| ENSG00000124275 |            | 0.45505618 |            | 0.45505618  |             |           | 0.3295455 |
| ENSG00000196092 |            | 0.28481013 |            | 0.284810127 |             |           | 0.304878  |
| ENSG00000158966 |            | 0.16969697 |            | 0.16969697  |             |           |           |
| ENSG00000170421 | 0.4375     | 0.48181818 | 0.4375     | 0.481818182 | 0.098765432 | 0.2073171 | 0.3837209 |
| ENSG00000105953 |            |            |            |             | 0.115853659 | 0.1176471 | 0.3488372 |
| ENSG00000165055 |            | 0.18539326 |            | 0.185393258 |             |           |           |
| ENSG00000084676 |            | 0.21111111 |            | 0.211111111 |             |           | 0.0777778 |
| ENSG00000187792 |            | 0.18484848 |            | 0.184848485 |             |           | 0.3546512 |
| ENSG00000120159 | 0.30113636 |            | 0.30113636 |             | 0.322222222 | 0.3409091 | 0.3409091 |
| ENSG00000139734 | 0.15868263 | 0.37222222 | 0.15868263 | 0.372222222 | 0.166666667 | 0.1162791 | 0.2045455 |
| ENSG00000130559 |            | 0.28787879 |            | 0.287878788 |             |           | 0.3647059 |
| ENSG00000169783 |            | 0.40062112 |            | 0.400621118 |             |           | 0.4588235 |
| ENSG00000114867 |            | 0.28181818 |            | 0.281818182 |             |           | 0.3081395 |
| ENSG00000049883 |            | 0.37058824 |            | 0.370588235 |             |           | 0.3255814 |
| ENSG00000171320 | 0.11077844 | 0.46666667 | 0.11077844 | 0.466666667 | 0.234939759 | 0.2209302 | 0.4244186 |
| ENSG00000197982 |            |            |            |             | 0.285714286 | 0.3488372 |           |
| ENSG00000111087 | 0.37724551 |            | 0.37724551 |             | 0.244047619 | 0.4593023 |           |
| ENSG00000156097 |            | 0.16969697 |            | 0.16969697  |             |           | 0.3662791 |
| ENSG00000145198 | 0.1686747  |            | 0.1686747  |             | 0.146341463 | 0.1627907 |           |

|                        |            |            |            |             |             |           |           |
|------------------------|------------|------------|------------|-------------|-------------|-----------|-----------|
| <b>ENSG00000172071</b> |            |            |            |             | 0.481707317 |           | 0.4431818 |
| <b>ENSG00000181513</b> | 0.39520958 | 0.0505618  | 0.39520958 | 0.050561798 | 0.208333333 |           | 0.25      |
| <b>ENSG00000107331</b> | 0.41916168 | 0.29393939 | 0.41916168 | 0.293939394 | 0.130952381 | 0.2235294 | 0.2325581 |
| <b>ENSG00000101349</b> | 0.36227545 | 0.365625   | 0.36227545 | 0.365625    | 0.207317073 | 0.25      | 0.4705882 |
| <b>ENSG00000075336</b> | 0.24550898 | 0.06363636 | 0.24550898 | 0.063636364 | 0.119047619 | 0.2159091 | 0.1511628 |
| <b>ENSG00000111879</b> |            | 0.40853659 |            | 0.408536585 |             |           | 0.25      |
| <b>ENSG00000102178</b> |            | 0.14417178 |            | 0.144171779 |             |           | 0.0872093 |
| <b>ENSG00000103769</b> |            | 0.16111111 |            | 0.161111111 |             |           | 0.2840909 |
| <b>ENSG00000138028</b> |            | 0.403125   |            | 0.403125    |             |           | 0.2142857 |
| <b>ENSG00000128563</b> | 0.08988764 | 0.27272727 | 0.08988764 | 0.272727273 |             |           | 0.2616279 |
| <b>ENSG00000120685</b> |            | 0.14848485 |            | 0.148484848 |             |           | 0.1647059 |
| <b>ENSG00000164023</b> |            | 0.26060606 |            | 0.260606061 | 0.141025641 | 0.1585366 | 0.0595238 |
| <b>ENSG00000166685</b> | 0.45481928 |            | 0.45481928 |             | 0.345238095 | 0.3546512 |           |
| <b>ENSG00000120659</b> |            | 0.48888889 |            | 0.488888889 |             |           | 0.3604651 |
| <b>ENSG00000118972</b> |            | 0.24233129 |            | 0.242331288 |             |           | 0.0988372 |
| <b>ENSG00000165300</b> | 0.26136364 |            | 0.26136364 |             |             |           |           |
| <b>ENSG00000063854</b> |            | 0.26966292 |            | 0.269662921 |             |           | 0.2613636 |
| <b>ENSG00000075413</b> |            | 0.36060606 |            | 0.360606061 |             |           | 0.3023256 |
| <b>ENSG00000166317</b> |            | 0.11818182 |            | 0.118181818 |             |           | 0.1860465 |
| <b>ENSG00000141404</b> |            | 0.46060606 |            | 0.460606061 |             |           | 0.4883721 |
| <b>ENSG00000118260</b> | 0.37777778 | 0.20555556 | 0.37777778 | 0.205555556 |             |           |           |
| <b>ENSG00000009790</b> | 0.35928144 | 0.36111111 | 0.35928144 | 0.361111111 | 0.261904762 | 0.4069767 | 0.2386364 |
| <b>ENSG00000171492</b> | 0.45508982 |            | 0.45508982 |             | 0.392857143 | 0.4825581 | 0.1453488 |
| <b>ENSG00000154305</b> |            | 0.09393939 |            | 0.093939394 |             |           | 0.1162791 |
| <b>ENSG00000137218</b> |            | 0.32424242 |            | 0.324242424 |             |           | 0.1046512 |
| <b>ENSG00000157637</b> |            | 0.2607362  |            | 0.260736196 |             |           |           |
| <b>ENSG00000241123</b> | 0.12068966 |            | 0.12068966 |             |             |           | 0.1555556 |
| <b>ENSG00000037965</b> |            | 0.44252874 |            | 0.442528736 |             |           | 0.4127907 |
| <b>ENSG00000221826</b> | 0.11111111 |            | 0.11111111 |             |             |           |           |
| <b>ENSG00000148153</b> |            | 0.08181818 |            | 0.081818182 |             |           |           |
| <b>ENSG00000153574</b> |            | 0.23636364 |            | 0.236363636 |             |           | 0.1744186 |
| <b>ENSG00000131910</b> |            | 0.26060606 |            | 0.260606061 |             |           |           |
| <b>ENSG00000011198</b> |            |            |            |             |             |           | 0.1470588 |
| <b>ENSG00000184470</b> | 0.39221557 | 0.19620253 | 0.39221557 | 0.196202532 | 0.136904762 | 0.1511628 | 0.0581395 |
| <b>ENSG00000113356</b> | 0.41017964 | 0.14545455 | 0.41017964 | 0.145454545 | 0.470238095 | 0.3372093 | 0.3895349 |
| <b>ENSG00000188883</b> |            | 0.17878788 |            | 0.178787879 |             |           | 0.1511628 |
| <b>ENSG00000112357</b> |            | 0.42901235 |            | 0.429012346 |             |           | 0.5       |
| <b>ENSG00000172380</b> |            | 0.47159091 |            | 0.471590909 |             |           | 0.4886364 |
| <b>ENSG00000143036</b> |            | 0.23030303 |            | 0.23030303  |             |           |           |
| <b>ENSG00000105131</b> |            | 0.24712644 |            | 0.247126437 |             |           | 0.2045455 |
| <b>ENSG00000203951</b> |            | 0.46111111 |            | 0.461111111 |             |           | 0.372093  |
| <b>ENSG00000140015</b> |            | 0.49393939 |            | 0.493939394 |             |           | 0.3604651 |
| <b>ENSG00000099957</b> |            | 0.43888889 |            | 0.438888889 |             |           | 0.4767442 |
| <b>ENSG00000106144</b> |            | 0.05       |            | 0.05        |             |           |           |
| <b>ENSG00000117222</b> | 0.08083832 | 0.18181818 | 0.08083832 | 0.181818182 | 0.488888889 | 0.4666667 | 0.4593023 |
| <b>ENSG00000165029</b> | 0.19461078 | 0.31515152 | 0.19461078 | 0.315151515 | 0.327380952 | 0.2823529 | 0.2209302 |
| <b>ENSG00000104044</b> | 0.12874251 |            | 0.12874251 |             | 0.357142857 | 0.3255814 |           |
| <b>ENSG00000120798</b> | 0.06886228 |            | 0.06886228 |             |             |           |           |
| <b>ENSG00000203908</b> |            | 0.13636364 |            | 0.136363636 |             |           |           |
| <b>ENSG00000158552</b> |            | 0.32727273 |            | 0.327272727 |             |           | 0.244186  |
| <b>ENSG00000144895</b> |            | 0.40555556 |            | 0.405555556 |             |           | 0.3522727 |
| <b>ENSG00000103365</b> |            | 0.12777778 |            | 0.127777778 |             |           | 0.2848837 |
| <b>ENSG00000204435</b> | 0.29640719 | 0.31212121 | 0.29640719 | 0.312121212 | 0.404761905 | 0.4302326 | 0.4534884 |
| <b>ENSG00000140157</b> |            | 0.46111111 |            | 0.461111111 |             |           | 0.3837209 |

|                 |            |            |            |             |             |           |           |
|-----------------|------------|------------|------------|-------------|-------------|-----------|-----------|
| ENSG00000121270 |            | 0.17272727 |            | 0.172727273 |             |           |           |
| ENSG00000135480 | 0.45783133 |            | 0.45783133 |             | 0.5         |           | 0.494186  |
| ENSG00000091583 | 0.07784431 | 0.46363636 | 0.07784431 | 0.463636364 |             | 0.0535714 | 0.0639535 |
| ENSG00000179409 |            | 0.32012195 |            | 0.320121951 |             |           | 0.1818182 |
| ENSG00000084092 | 0.26111111 |            | 0.26111111 |             | 0.488888889 |           | 0.5       |
| ENSG00000213923 |            |            |            |             |             |           | 0.1395349 |
| ENSG00000134398 | 0.05988024 |            | 0.05988024 |             | 0.261904762 |           | 0.4069767 |
| ENSG00000135956 |            | 0.49085366 |            | 0.490853659 |             |           | 0.2906977 |
| ENSG00000183833 | 0.17058824 | 0.29573171 | 0.17058824 | 0.295731707 | 0.214285714 | 0.2804878 | 0.2790698 |
| ENSG00000141458 |            |            |            |             | 0.368421053 |           | 0.2205882 |
| ENSG00000140471 |            | 0.48701299 |            | 0.487012987 |             |           | 0.4418605 |
| ENSG00000154277 | 0.13888889 | 0.23333333 | 0.13888889 | 0.233333333 |             |           | 0.1511628 |
| ENSG00000186716 |            | 0.34090909 |            | 0.340909091 |             |           | 0.3555556 |
| ENSG00000158887 |            | 0.09090909 |            | 0.090909091 |             |           |           |
| ENSG00000168038 | 0.29041916 |            | 0.29041916 |             |             |           |           |
| ENSG00000103657 |            | 0.15909091 |            | 0.159090909 |             |           | 0.0755814 |
| ENSG00000104884 |            | 0.31212121 |            | 0.312121212 |             |           | 0.1022727 |
| ENSG00000188263 |            | 0.41477273 |            | 0.414772727 |             |           | 0.4534884 |
| ENSG00000165915 |            | 0.32121212 |            | 0.321212121 |             |           | 0.3571429 |
| ENSG00000167613 | 0.43373494 | 0.32727273 | 0.43373494 | 0.327272727 | 0.178571429 | 0.1918605 | 0.4125    |
| ENSG00000213020 | 0.28333333 | 0.36060606 | 0.28333333 | 0.360606061 | 0.466666667 | 0.4444444 | 0.4705882 |
| ENSG00000171714 |            | 0.32208589 |            | 0.32208589  |             |           | 0.4772727 |
| ENSG00000172987 |            | 0.49444444 |            | 0.494444444 |             |           | 0.4651163 |
| ENSG00000114204 |            | 0.07621951 |            | 0.076219512 |             |           | 0.3430233 |
| ENSG00000258811 |            | 0.28395062 |            | 0.283950617 |             |           | 0.3717949 |
| ENSG00000064995 | 0.34090909 | 0.14848485 | 0.34090909 | 0.148484848 | 0.155555556 | 0.1136364 | 0.4941176 |
| ENSG00000108883 |            | 0.38181818 |            | 0.381818182 |             |           | 0.4588235 |
| ENSG00000116962 |            | 0.15454545 |            | 0.154545455 |             |           | 0.3294118 |
| ENSG00000086758 |            | 0.41818182 |            | 0.418181818 |             |           | 0.4235294 |
| ENSG00000175329 | 0.40340909 | 0.39393939 | 0.40340909 | 0.393939394 | 0.130952381 | 0.2727273 | 0.377907  |
| ENSG00000140538 |            | 0.39570552 |            | 0.395705521 |             |           | 0.4186047 |
| ENSG00000138658 | 0.37078652 | 0.42424242 | 0.37078652 | 0.424242424 | 0.418604651 | 0.4360465 | 0.4360465 |
| ENSG00000185222 | 0.05722892 |            | 0.05722892 |             |             |           |           |
| ENSG00000140262 |            | 0.23939394 |            | 0.239393939 |             |           | 0.4207317 |
| ENSG00000132341 |            | 0.29393939 |            | 0.293939394 |             |           | 0.3081395 |
| ENSG00000204599 |            | 0.12727273 |            | 0.127272727 |             |           | 0.372093  |
| ENSG00000182257 |            | 0.33939394 |            | 0.339393939 |             |           | 0.1046512 |
| ENSG00000179038 |            | 0.08598726 |            | 0.085987261 |             |           | 0.2034884 |
| ENSG00000162946 | 0.34431138 | 0.38787879 | 0.34431138 | 0.387878788 | 0.333333333 | 0.3081395 | 0.4534884 |
| ENSG00000106105 | 0.14371257 |            | 0.14371257 |             |             |           |           |
| ENSG00000162595 | 0.44610778 |            | 0.44610778 |             |             |           |           |
| ENSG00000135447 |            | 0.31212121 |            | 0.312121212 |             |           | 0.0639535 |
| ENSG00000139193 |            |            |            |             | 0.255952381 |           | 0.1744186 |
| ENSG00000205138 |            | 0.16111111 |            | 0.161111111 |             |           |           |
| ENSG00000110080 | 0.39820359 |            | 0.39820359 |             | 0.488888889 |           | 0.4204545 |
| ENSG00000215475 |            | 0.5        |            | 0.5         | 0.05952381  | 0.0872093 | 0.4886364 |
| ENSG00000123395 |            | 0.17272727 |            | 0.172727273 |             |           | 0.4767442 |
| ENSG00000188687 | 0.16111111 | 0.38484848 | 0.16111111 | 0.384848485 | 0.388888889 | 0.3181818 | 0.1860465 |
| ENSG00000019991 |            | 0.22424242 |            | 0.224242424 | 0.073170732 | 0.0581395 | 0.1511628 |
| ENSG00000171877 |            |            |            |             | 0.464285714 | 0.4186047 | 0.2732558 |
| ENSG00000189114 |            | 0.13939394 |            | 0.139393939 |             |           |           |
| ENSG00000188312 | 0.23652695 | 0.21818182 | 0.23652695 | 0.218181818 | 0.255952381 | 0.4883721 | 0.4886364 |
| ENSG00000170049 |            | 0.49390244 |            | 0.493902439 |             |           | 0.1395349 |
| ENSG00000100418 |            | 0.20909091 |            | 0.209090909 |             |           | 0.0639535 |

|                 |            |            |            |             |             |           |           |
|-----------------|------------|------------|------------|-------------|-------------|-----------|-----------|
| ENSG00000106392 | 0.11077844 | 0.4202454  | 0.11077844 | 0.420245399 |             |           | 0.4       |
| ENSG00000204110 |            | 0.43055556 |            | 0.430555556 |             |           | 0.4594595 |
| ENSG00000149021 | 0.3502994  |            | 0.3502994  |             | 0.392857143 | 0.4011628 |           |
| ENSG00000118579 |            | 0.38181818 |            | 0.381818182 |             |           | 0.1162791 |
| ENSG00000154930 | 0.38922156 | 0.34848485 | 0.38922156 | 0.348484848 | 0.279761905 | 0.1882353 | 0.2151163 |
| ENSG00000162819 | 0.21257485 | 0.24848485 | 0.21257485 | 0.248484848 | 0.261904762 | 0.3430233 | 0.4593023 |
| ENSG00000206538 |            | 0.44444444 |            | 0.444444444 |             |           | 0.4883721 |
| ENSG00000047849 |            | 0.4030303  |            | 0.403030303 |             |           | 0.244186  |
| ENSG00000126001 |            | 0.2030303  |            | 0.203030303 |             |           | 0.244186  |
| ENSG00000169758 |            | 0.49695122 |            | 0.49695122  |             |           | 0.4476744 |
| ENSG00000099875 |            | 0.1744186  |            | 0.174418605 | 0.244047619 | 0.1686047 | 0.5       |
| ENSG00000132004 | 0.43333333 |            | 0.43333333 |             |             |           |           |
| ENSG00000129255 | 0.32335329 | 0.38484848 | 0.32335329 | 0.384848485 | 0.369047619 | 0.4127907 | 0.2790698 |
| ENSG00000166333 | 0.42168675 | 0.32424242 | 0.42168675 | 0.324242424 | 0.339285714 | 0.3662791 | 0.3662791 |
| ENSG00000188779 |            | 0.22727273 |            | 0.227272727 |             |           | 0.2034884 |
| ENSG00000174946 | 0.2245509  |            | 0.2245509  |             | 0.107142857 | 0.0755814 |           |
| ENSG00000134222 | 0.05688623 | 0.11890244 | 0.05688623 | 0.118902439 |             |           |           |
| ENSG00000163931 |            | 0.23837209 |            | 0.238372093 |             |           | 0.1511628 |
| ENSG00000143013 |            | 0.10559006 |            | 0.105590062 |             |           | 0.2151163 |
| ENSG00000101204 |            | 0.41768293 |            | 0.417682927 |             |           | 0.3647059 |
| ENSG00000129103 |            | 0.26363636 |            | 0.263636364 |             |           | 0.3430233 |
| ENSG00000198225 |            | 0.35795455 |            | 0.357954545 |             |           | 0.4767442 |
| ENSG00000185933 |            | 0.35757576 |            | 0.357575758 |             |           | 0.4705882 |
| ENSG00000187980 |            | 0.39759036 |            | 0.397590361 |             |           | 0.4666667 |
| ENSG00000164118 |            | 0.37878788 |            | 0.378787879 |             |           |           |
| ENSG00000022976 | 0.28089888 | 0.28658537 | 0.28089888 | 0.286585366 | 0.428571429 | 0.3546512 | 0.4825581 |
| ENSG00000204256 | 0.15757576 | 0.41818182 | 0.15757576 | 0.418181818 | 0.488095238 | 0.4302326 | 0.2906977 |
| ENSG00000206503 | 0.26470588 | 0.12121212 | 0.26470588 | 0.121212121 | 0.345238095 | 0.078125  | 0.1104651 |
| ENSG00000105767 |            | 0.4969697  |            | 0.496969697 |             |           | 0.1918605 |
| ENSG00000079931 | 0.27840909 | 0.07272727 | 0.27840909 | 0.072727273 | 0.271084337 | 0.1845238 | 0.5       |
| ENSG00000198467 | 0.23952096 | 0.16666667 | 0.23952096 | 0.166666667 | 0.053571429 | 0.0523256 |           |
| ENSG00000057593 |            | 0.12121212 |            | 0.121212121 |             |           | 0.0523256 |
| ENSG00000110395 |            | 0.30909091 |            | 0.309090909 |             |           | 0.4069767 |
| ENSG00000110195 | 0.13772455 |            | 0.13772455 |             | 0.138554217 |           |           |
| ENSG00000103037 |            | 0.41212121 |            | 0.412121212 |             |           | 0.372093  |
| ENSG00000184908 | 0.38023952 |            | 0.38023952 |             |             |           |           |
| ENSG00000167524 |            | 0.07716049 |            | 0.077160494 |             |           | 0.1506024 |
| ENSG00000198168 |            | 0.43333333 |            | 0.433333333 |             |           | 0.2619048 |
| ENSG00000187741 |            | 0.43888889 |            | 0.438888889 |             |           |           |
| ENSG00000204536 | 0.4760479  | 0.46969697 | 0.4760479  | 0.46969697  | 0.410714286 | 0.4709302 | 0.4302326 |
| ENSG00000235162 |            | 0.47777778 |            | 0.477777778 |             |           | 0.4090909 |
| ENSG00000148832 |            | 0.15       |            | 0.15        |             |           | 0.0529412 |
| ENSG00000188157 |            | 0.28834356 |            | 0.288343558 |             |           | 0.1818182 |
| ENSG00000055483 | 0.11976048 | 0.48181818 | 0.11976048 | 0.481818182 | 0.475903614 | 0.494186  | 0.4941176 |
| ENSG00000158748 | 0.4011976  |            | 0.4011976  |             | 0.15060241  | 0.0705882 |           |
| ENSG00000108091 |            | 0.49425287 |            | 0.494252874 |             |           | 0.5       |
| ENSG00000124568 |            | 0.44545455 |            | 0.445454545 |             |           | 0.3       |
| ENSG00000167645 |            | 0.23939394 |            | 0.239393939 |             |           | 0.4593023 |
| ENSG00000162144 | 0.36826347 |            | 0.36826347 |             |             |           |           |
| ENSG00000196814 |            | 0.48484848 |            | 0.484848485 |             |           | 0.4767442 |
| ENSG00000148225 | 0.10555556 | 0.41818182 | 0.10555556 | 0.418181818 | 0.162790698 | 0.2       | 0.2       |
| ENSG00000171503 |            | 0.28484848 |            | 0.284848485 |             |           | 0.1569767 |
| ENSG00000176601 | 0.35628743 | 0.38109756 | 0.35628743 | 0.381097561 | 0.488095238 | 0.4534884 | 0.3493976 |
| ENSG00000219073 |            | 0.34259259 |            | 0.342592593 |             |           | 0.3783784 |

|                |            |            |            |             |             |            |           |
|----------------|------------|------------|------------|-------------|-------------|------------|-----------|
| ENSG0000090554 |            | 0.18181818 |            | 0.181818182 |             |            | 0.122093  |
| ENSG0000134160 |            | 0.49393939 |            | 0.493939394 |             |            | 0.1453488 |
| ENSG0000205913 |            | 0.30909091 |            | 0.309090909 |             |            | 0.4222222 |
| ENSG0000176697 | 0.12222222 | 0.33636364 | 0.12222222 | 0.336363636 | 0.204545455 | 0.41111111 | 0.372093  |
| ENSG0000107018 |            | 0.19817073 |            | 0.198170732 |             |            | 0.4709302 |
| ENSG0000144468 | 0.48333333 | 0.26666667 | 0.48333333 | 0.266666667 | 0.2         | 0.125      |           |
| ENSG0000187672 |            | 0.45705521 |            | 0.457055215 |             |            | 0.2034884 |
| ENSG0000185873 |            | 0.26111111 |            | 0.261111111 |             |            |           |
| ENSG0000172379 |            | 0.42987805 |            | 0.429878049 |             |            | 0.077381  |
| ENSG0000166225 | 0.14071856 | 0.36666667 | 0.14071856 | 0.366666667 | 0.327380952 | 0.2235294  | 0.2674419 |
| ENSG0000180113 |            | 0.20552147 |            | 0.205521472 |             |            | 0.1176471 |
| ENSG0000133302 |            | 0.19090909 |            | 0.190909091 |             |            | 0.2848837 |
| ENSG0000183826 |            | 0.45454545 |            | 0.454545455 |             |            | 0.4       |
| ENSG0000163093 | 0.10674157 |            | 0.10674157 |             |             |            |           |
| ENSG0000136738 |            | 0.09937888 |            | 0.099378882 |             |            | 0.054878  |
| ENSG0000203666 |            | 0.375      |            | 0.375       |             |            | 0.3488372 |
| ENSG0000182199 | 0.0508982  | 0.06060606 | 0.0508982  | 0.060606061 | 0.154761905 | 0.0813953  |           |
| ENSG0000149295 | 0.33832335 | 0.32758621 | 0.33832335 | 0.327586207 | 0.208333333 | 0.2732558  | 0.4659091 |
| ENSG0000138741 |            | 0.31097561 |            | 0.31097561  |             |            | 0.4470588 |
| ENSG0000163606 |            | 0.46226415 |            | 0.462264151 |             |            | 0.4545455 |
| ENSG0000170185 |            | 0.37222222 |            | 0.372222222 |             |            | 0.2386364 |
| ENSG0000137434 | 0.41111111 |            | 0.41111111 |             |             |            |           |
| ENSG0000132680 | 0.34659091 |            | 0.34659091 |             | 0.088888889 | 0.0909091  |           |
| ENSG0000168994 |            | 0.15757576 |            | 0.157575758 |             |            | 0.2267442 |
| ENSG0000182077 | 0.39820359 |            | 0.39820359 |             | 0.321428571 | 0.3546512  |           |
| ENSG0000109339 | 0.46107784 | 0.48192771 | 0.46107784 | 0.481927711 | 0.313253012 | 0.3        | 0.377907  |
| ENSG0000047249 | 0.14371257 | 0.05454545 | 0.14371257 | 0.054545455 |             |            | 0.4285714 |
| ENSG0000183760 | 0.08383234 |            | 0.08383234 |             | 0.273809524 | 0.25       |           |
| ENSG0000197658 | 0.49101796 | 0.49411765 | 0.49101796 | 0.494117647 | 0.083333333 | 0.1046512  | 0.3444444 |
| ENSG0000139800 |            | 0.20909091 |            | 0.209090909 |             |            | 0.0872093 |
| ENSG0000116830 |            |            |            |             | 0.101190476 | 0.1569767  |           |
| ENSG0000166833 | 0.47701149 | 0.47878788 | 0.47701149 | 0.478787879 | 0.288888889 | 0.2613636  | 0.4244186 |
| ENSG0000175356 |            | 0.23636364 |            | 0.236363636 |             |            | 0.127907  |
| ENSG0000146352 | 0.30113636 | 0.21036585 | 0.30113636 | 0.210365854 | 0.455555556 | 0.2954545  | 0.125     |
| ENSG0000145147 | 0.14371257 | 0.29878049 | 0.14371257 | 0.298780488 |             | 0.0697674  | 0.1555556 |
| ENSG0000107862 | 0.17365269 | 0.11212121 | 0.17365269 | 0.112121212 | 0.214285714 | 0.2267442  |           |
| ENSG0000118655 | 0.15269461 | 0.21212121 | 0.15269461 | 0.212121212 | 0.119047619 | 0.2638889  | 0.1744186 |
| ENSG0000174842 |            | 0.46385542 |            | 0.463855422 |             |            |           |
| ENSG0000183628 |            | 0.08333333 |            | 0.083333333 |             |            |           |
| ENSG0000181215 | 0.23053892 | 0.33939394 | 0.23053892 | 0.339393939 | 0.279761905 | 0.4302326  | 0.1744186 |
| ENSG0000185055 |            |            |            |             |             |            | 0.0639535 |
| ENSG0000140009 |            | 0.41515152 |            | 0.415151515 |             |            | 0.4659091 |
| ENSG0000123200 |            | 0.32727273 |            | 0.327272727 |             |            | 0.3081395 |
| ENSG0000196118 | 0.23652695 |            | 0.23652695 |             | 0.077380952 | 0.0988372  |           |
| ENSG0000152422 |            |            |            |             | 0.111111111 | 0.1590909  |           |
| ENSG0000166888 | 0.10778443 | 0.44848485 | 0.10778443 | 0.448484848 | 0.301204819 | 0.1976744  | 0.3764706 |
| ENSG0000146054 | 0.30113636 |            | 0.30113636 |             | 0.111111111 | 0.125      |           |
| ENSG0000224689 |            | 0.15340909 |            | 0.153409091 |             |            |           |
| ENSG0000066735 |            | 0.47878788 |            | 0.478787879 |             |            | 0.3705882 |
| ENSG0000158161 |            | 0.29090909 |            | 0.290909091 |             |            | 0.4244186 |
| ENSG0000004809 | 0.39090909 | 0.49390244 | 0.39090909 | 0.493902439 | 0.475903614 | 0.3588235  | 0.4651163 |
| ENSG0000164344 |            | 0.09393939 |            | 0.093939394 |             |            | 0.0523256 |
| ENSG0000154845 |            | 0.19817073 |            | 0.198170732 |             |            | 0.4360465 |
| ENSG0000104835 | 0.07185629 | 0.375      | 0.07185629 | 0.375       |             |            | 0.2954545 |

|                 |            |            |            |             |             |           |           |
|-----------------|------------|------------|------------|-------------|-------------|-----------|-----------|
| ENSG00000154133 | 0.38372093 | 0.37878788 | 0.38372093 | 0.378787879 |             |           | 0.1162791 |
| ENSG00000136697 | 0.28143713 |            | 0.28143713 |             | 0.267857143 | 0.2732558 |           |
| ENSG00000108590 |            | 0.29775281 |            | 0.297752809 |             |           | 0.4090909 |
| ENSG00000156265 | 0.46107784 | 0.48181818 | 0.46107784 | 0.481818182 | 0.297619048 | 0.327381  | 0.4593023 |
| ENSG00000122970 | 0.45808383 |            | 0.45808383 |             |             |           |           |
| ENSG00000213999 |            | 0.33030303 |            | 0.33030303  |             |           | 0.3081395 |
| ENSG00000135828 | 0.06287425 | 0.4        | 0.06287425 | 0.4         | 0.273809524 | 0.1918605 | 0.3662791 |
| ENSG00000133983 |            | 0.29090909 |            | 0.290909091 |             |           | 0.0930233 |
| ENSG00000197780 |            | 0.20121951 |            | 0.201219512 |             |           | 0.4069767 |
| ENSG00000136870 |            | 0.47878788 |            | 0.478787879 |             |           | 0.4529412 |
| ENSG00000106536 | 0.23333333 | 0.38181818 | 0.23333333 | 0.381818182 | 0.102272727 | 0.1777778 | 0.5       |
| ENSG00000107105 | 0.23952096 | 0.08227848 | 0.23952096 | 0.082278481 |             |           |           |
| ENSG00000137752 |            | 0.25914634 |            | 0.259146341 | 0.057142857 |           | 0.25      |
| ENSG00000178752 |            | 0.4        |            | 0.4         |             |           | 0.2333333 |
| ENSG00000102003 |            | 0.31212121 |            | 0.312121212 |             |           | 0.3313953 |
| ENSG00000014164 |            | 0.26060606 |            | 0.260606061 |             |           | 0.4244186 |
| ENSG00000205268 |            | 0.31111111 |            | 0.311111111 |             |           | 0.5       |
| ENSG00000166153 |            | 0.13414634 |            | 0.134146341 |             |           | 0.3705882 |
| ENSG00000110880 |            | 0.49691358 |            | 0.49691358  |             |           |           |
| ENSG00000243444 |            | 0.2752809  |            | 0.275280899 |             |           | 0.3111111 |
| ENSG00000167470 | 0.09375    | 0.26969697 | 0.09375    | 0.26969697  | 0.426829268 | 0.4457831 | 0.255814  |
| ENSG00000185905 |            | 0.20909091 |            | 0.209090909 |             |           | 0.0639535 |
| ENSG00000182132 | 0.21176471 | 0.29090909 | 0.21176471 | 0.290909091 | 0.238095238 | 0.2383721 | 0.2034884 |
| ENSG00000176170 | 0.46540881 |            | 0.46540881 |             | 0.0625      | 0.0853659 | 0.0813953 |
| ENSG00000164828 | 0.21987952 | 0.29393939 | 0.21987952 | 0.293939394 | 0.477777778 | 0.4318182 | 0.3255814 |
| ENSG00000113593 |            | 0.3030303  |            | 0.303030303 |             |           | 0.3488372 |
| ENSG00000109181 |            | 0.14848485 |            | 0.148484848 |             |           | 0.1352941 |
| ENSG00000108384 |            | 0.2        |            | 0.2         |             |           | 0.2383721 |
| ENSG00000186660 |            | 0.29090909 |            | 0.290909091 |             |           | 0.2093023 |
| ENSG00000166851 |            | 0.14772727 |            | 0.147727273 |             |           | 0.3863636 |
| ENSG00000141141 |            | 0.21511628 |            | 0.215116279 |             |           | 0.4772727 |
| ENSG00000135473 |            | 0.06111111 |            | 0.061111111 |             |           | 0.25      |
| ENSG00000095627 |            | 0.08787879 |            | 0.087878788 |             |           | 0.0639535 |
| ENSG00000141965 |            | 0.32727273 |            | 0.327272727 |             |           | 0.4127907 |
| ENSG00000100731 |            | 0.46111111 |            | 0.461111111 |             |           | 0.2732558 |
| ENSG00000103313 |            | 0.46036585 |            | 0.460365854 |             |           | 0.3953488 |
| ENSG00000205045 | 0.31927711 |            | 0.31927711 |             | 0.18452381  | 0.1744186 |           |
| ENSG00000100714 | 0.06886228 |            | 0.06886228 |             | 0.31547619  | 0.2151163 |           |
| ENSG00000181355 | 0.48502994 | 0.25609756 | 0.48502994 | 0.256097561 | 0.05952381  |           | 0.4       |
| ENSG00000162086 | 0.10179641 |            | 0.10179641 |             | 0.113095238 | 0.2093023 |           |
| ENSG00000128654 | 0.25748503 |            | 0.25748503 |             | 0.113095238 | 0.2034884 |           |
| ENSG00000140545 |            | 0.37575758 |            | 0.375757576 |             |           | 0.4883721 |
| ENSG00000198677 | 0.10479042 | 0.15853659 | 0.10479042 | 0.158536585 | 0.428571429 | 0.4593023 | 0.1860465 |
| ENSG00000148572 |            | 0.32424242 |            | 0.324242424 |             |           | 0.2151163 |
| ENSG00000099246 |            |            |            |             |             |           | 0.3197674 |
| ENSG00000129474 |            | 0.33888889 |            | 0.338888889 |             |           | 0.2159091 |
| ENSG00000146938 | 0.11666667 | 0.40116279 | 0.11666667 | 0.401162791 | 0.428571429 | 0.3823529 | 0.3895349 |
| ENSG00000111615 |            | 0.41818182 |            | 0.418181818 |             |           | 0.494186  |
| ENSG00000138166 |            | 0.31402439 |            | 0.31402439  |             |           | 0.4302326 |
| ENSG00000079263 |            | 0.26704545 |            | 0.267045455 |             |           | 0.1511628 |
| ENSG00000155875 | 0.33532934 | 0.22727273 | 0.33532934 | 0.227272727 | 0.494047619 | 0.4709302 | 0.2965116 |
| ENSG00000204118 |            | 0.07777778 |            | 0.077777778 |             |           | 0.1081081 |
| ENSG00000148408 |            | 0.48484848 |            | 0.484848485 | 0.208333333 | 0.1802326 | 0.3289474 |
| ENSG00000114019 |            | 0.33636364 |            | 0.336363636 |             |           |           |

|                 |            |            |            |             |             |  |           |           |
|-----------------|------------|------------|------------|-------------|-------------|--|-----------|-----------|
| ENSG00000139651 |            | 0.0505618  |            | 0.050561798 | 0.154761905 |  | 0.2267442 | 0.2073171 |
| ENSG00000131778 |            | 0.33030303 |            | 0.33030303  |             |  |           | 0.1744186 |
| ENSG00000003056 | 0.06287425 | 0.48447205 | 0.06287425 | 0.48447205  |             |  |           | 0.4883721 |
| ENSG00000153214 | 0.22590361 | 0.46060606 | 0.22590361 | 0.460606061 | 0.119047619 |  | 0.1235294 | 0.1294118 |
| ENSG00000173327 |            | 0.28181818 |            | 0.281818182 |             |  |           | 0.1764706 |
| ENSG00000183715 |            | 0.34876543 |            | 0.348765432 |             |  |           | 0.4360465 |
| ENSG00000111252 | 0.46084337 | 0.2        | 0.46084337 | 0.2         |             |  |           | 0.4534884 |
| ENSG00000185201 | 0.35928144 |            | 0.35928144 |             | 0.351190476 |  | 0.2764706 |           |
| ENSG00000178971 |            | 0.46363636 |            | 0.463636364 |             |  |           | 0.494186  |
| ENSG00000069399 | 0.26646707 |            | 0.26646707 |             | 0.398809524 |  | 0.377907  |           |
| ENSG00000242550 | 0.4        |            | 0.4        |             | 0.477777778 |  | 0.375     | 0.1666667 |
| ENSG00000186867 |            | 0.15454545 |            | 0.154545455 |             |  |           | 0.3313953 |
| ENSG00000169490 | 0.09580838 | 0.36060606 | 0.09580838 | 0.360606061 | 0.285714286 |  | 0.3197674 | 0.2383721 |
| ENSG00000166508 |            |            |            |             | 0.267857143 |  | 0.2906977 |           |
| ENSG00000170745 | 0.2754491  | 0.4        | 0.2754491  | 0.4         | 0.476190476 |  | 0.4090909 | 0.3255814 |
| ENSG00000108179 |            | 0.45454545 |            | 0.454545455 |             |  |           | 0.3035714 |
| ENSG00000160808 |            | 0.11656442 |            | 0.116564417 |             |  |           | 0.2383721 |
| ENSG00000174306 | 0.5        | 0.45757576 | 0.5        | 0.457575758 |             |  | 0.0930233 | 0.4777778 |
| ENSG00000157106 |            | 0.36111111 |            | 0.361111111 |             |  |           | 0.0755814 |
| ENSG00000120555 |            | 0.09550562 |            | 0.095505618 |             |  |           |           |
| ENSG00000130787 |            | 0.06969697 |            | 0.06969697  |             |  |           |           |
| ENSG00000187961 |            | 0.07575758 |            | 0.075757576 |             |  |           | 0.3488372 |
| ENSG00000116731 | 0.15868263 | 0.32621951 | 0.15868263 | 0.326219512 | 0.231707317 |  | 0.2613636 | 0.4767442 |
| ENSG00000162512 | 0.35329341 | 0.47878788 | 0.35329341 | 0.478787879 | 0.488095238 |  | 0.4418605 | 0.4418605 |
| ENSG00000151748 |            | 0.35454545 |            | 0.354545455 |             |  |           | 0.2267442 |
| ENSG00000173376 |            | 0.22865854 |            | 0.228658537 |             |  |           | 0.2       |
| ENSG00000138303 | 0.29518072 | 0.44207317 | 0.29518072 | 0.442073171 | 0.125       |  | 0.1162791 | 0.2965116 |
| ENSG00000186665 |            | 0.29393939 |            | 0.293939394 |             |  |           | 0.2325581 |
| ENSG00000153786 |            | 0.29393939 |            | 0.293939394 |             |  |           | 0.494186  |
| ENSG00000141179 | 0.43333333 | 0.21515152 | 0.43333333 | 0.215151515 | 0.056818182 |  | 0.1111111 | 0.1511628 |
| ENSG00000215853 |            | 0.46341463 |            | 0.463414634 |             |  |           | 0.4360465 |
| ENSG00000104613 |            | 0.43333333 |            | 0.433333333 |             |  |           | 0.244186  |
| ENSG00000204703 |            | 0.08787879 |            | 0.087878788 |             |  |           | 0.0697674 |
| ENSG00000124116 |            | 0.33030303 |            | 0.33030303  |             |  |           | 0.2906977 |
| ENSG00000132535 | 0.35240964 |            | 0.35240964 |             | 0.470238095 |  | 0.4302326 |           |
| ENSG00000136193 |            | 0.35365854 |            | 0.353658537 |             |  |           | 0.3068182 |
| ENSG00000165449 | 0.25449102 | 0.41194969 | 0.25449102 | 0.411949686 |             |  | 0.1337209 | 0.3546512 |
| ENSG00000130429 |            | 0.06363636 |            | 0.063636364 |             |  |           |           |
| ENSG00000182117 |            | 0.15340909 |            | 0.153409091 |             |  |           | 0.375     |
| ENSG00000174839 |            | 0.45731707 |            | 0.457317073 |             |  |           | 0.4823529 |
| ENSG00000144283 |            | 0.31515152 |            | 0.315151515 |             |  |           | 0.2848837 |
| ENSG00000232013 |            | 0.40804598 |            | 0.408045977 |             |  |           | 0.4659091 |
| ENSG00000125611 | 0.07784431 | 0.45121951 | 0.07784431 | 0.451219512 | 0.494047619 |  | 0.3604651 | 0.452381  |
| ENSG00000135424 | 0.39204545 | 0.06666667 | 0.39204545 | 0.066666667 | 0.31547619  |  | 0.3255814 |           |
| ENSG00000157404 |            | 0.13030303 |            | 0.13030303  |             |  |           | 0.0755814 |
| ENSG00000139144 | 0.33536585 | 0.2347561  | 0.33536585 | 0.234756098 | 0.269230769 |  | 0.2926829 | 0.3313953 |
| ENSG00000023191 | 0.34131737 | 0.11728395 | 0.34131737 | 0.117283951 | 0.226190476 |  | 0.2058824 | 0.0952381 |
| ENSG00000151322 | 0.46111111 | 0.41818182 | 0.46111111 | 0.418181818 | 0.404761905 |  | 0.25      | 0.4651163 |
| ENSG00000204614 | 0.31325301 | 0.32424242 | 0.31325301 | 0.324242424 | 0.291666667 |  | 0.2333333 | 0.1569767 |
| ENSG00000158516 |            | 0.41818182 |            | 0.418181818 |             |  |           | 0.2352941 |
| ENSG00000147164 |            | 0.3969697  |            | 0.396969697 |             |  |           | 0.3139535 |
| ENSG00000111802 | 0.11377246 | 0.31818182 | 0.11377246 | 0.318181818 | 0.333333333 |  | 0.4767442 | 0.1162791 |
| ENSG00000203797 |            | 0.4        |            | 0.4         |             |  |           | 0.3953488 |
| ENSG00000175155 |            | 0.49444444 |            | 0.494444444 |             |  |           | 0.2906977 |

|                 |            |            |            |             |             |           |           |
|-----------------|------------|------------|------------|-------------|-------------|-----------|-----------|
| ENSG00000104970 |            | 0.25609756 |            | 0.256097561 |             |           | 0.1976744 |
| ENSG00000170777 |            | 0.27272727 |            | 0.272727273 |             |           | 0.1569767 |
| ENSG00000071246 | 0.13173653 | 0.43030303 | 0.13173653 | 0.43030303  | 0.238095238 | 0.255814  | 0.4883721 |
| ENSG00000178662 |            | 0.45       |            | 0.45        |             |           | 0.2954545 |
| ENSG00000135486 | 0.17365269 | 0.12777778 | 0.17365269 | 0.127777778 | 0.44047619  | 0.4069767 |           |
| ENSG00000057608 |            | 0.36111111 |            | 0.36111111  | 0.11111111  | 0.0681818 | 0.4204545 |
| ENSG00000120217 |            | 0.45454545 |            | 0.454545455 |             |           | 0.4709302 |
| ENSG00000171722 |            | 0.44478528 |            | 0.444785276 |             |           | 0.4767442 |
| ENSG00000100697 | 0.16111111 | 0.38414634 | 0.16111111 | 0.384146341 |             |           | 0.4186047 |
| ENSG00000163520 | 0.32777778 | 0.2247191  | 0.32777778 | 0.224719101 |             |           | 0.2222222 |
| ENSG00000205133 | 0.22777778 | 0.08231707 | 0.22777778 | 0.082317073 | 0.377777778 | 0.2613636 |           |
| ENSG00000158869 |            | 0.12121212 |            | 0.121212121 |             |           | 0.4117647 |
| ENSG00000149418 | 0.07185629 | 0.36206897 | 0.07185629 | 0.362068966 | 0.196428571 | 0.1337209 | 0.4431818 |
| ENSG00000112320 |            | 0.25454545 |            | 0.254545455 |             |           | 0.4302326 |
| ENSG00000077684 |            | 0.16969697 |            | 0.16969697  |             |           |           |
| ENSG00000198730 | 0.10778443 | 0.07471264 | 0.10778443 | 0.074712644 | 0.44047619  | 0.4941176 | 0.2159091 |
| ENSG00000158258 |            | 0.34848485 |            | 0.348484848 |             |           | 0.0930233 |
| ENSG00000138459 |            | 0.08181818 |            | 0.081818182 |             |           | 0.25      |
| ENSG00000213995 |            | 0.26060606 |            | 0.260606061 |             |           | 0.3081395 |
| ENSG00000120438 |            | 0.49393939 |            | 0.493939394 |             |           | 0.4476744 |
| ENSG00000124205 |            |            |            |             |             |           | 0.1162791 |
| ENSG00000156171 | 0.22754491 | 0.14242424 | 0.22754491 | 0.142424242 | 0.154761905 | 0.1976744 | 0.3294118 |
| ENSG00000174358 |            | 0.45757576 |            | 0.457575758 |             |           | 0.3255814 |
| ENSG00000158955 |            | 0.31111111 |            | 0.311111111 |             |           | 0.375     |
| ENSG00000184508 |            | 0.26969697 |            | 0.26969697  |             |           | 0.4418605 |
| ENSG00000056972 |            | 0.46060606 |            | 0.460606061 |             |           | 0.4127907 |
| ENSG00000186038 | 0.23888889 |            | 0.23888889 |             | 0.238095238 | 0.255814  |           |
| ENSG00000138435 |            | 0.06969697 |            | 0.06969697  |             |           | 0.0697674 |
| ENSG00000196367 |            | 0.16363636 |            | 0.163636364 |             |           | 0.2705882 |
| ENSG00000115677 |            | 0.18484848 |            | 0.184848485 |             |           | 0.4883721 |
| ENSG00000153904 |            | 0.42073171 |            | 0.420731707 |             |           | 0.3255814 |
| ENSG00000144036 |            | 0.37272727 |            | 0.372727273 |             |           | 0.0595238 |
| ENSG00000221880 |            |            |            |             |             |           | 0.1547619 |
| ENSG00000143643 |            | 0.28571429 |            | 0.285714286 |             |           | 0.2857143 |
| ENSG00000198826 |            | 0.31818182 |            | 0.318181818 |             |           | 0.2325581 |
| ENSG00000120519 |            | 0.5        |            | 0.5         |             |           | 0.2857143 |
| ENSG00000172497 |            | 0.46932515 |            | 0.469325153 |             |           | 0.2705882 |
| ENSG00000186088 |            | 0.08181818 |            | 0.081818182 | 0.148148148 | 0.0581395 |           |
| ENSG00000141622 |            | 0.27272727 |            | 0.272727273 |             |           | 0.2267442 |
| ENSG00000160818 | 0.13888889 | 0.25151515 | 0.13888889 | 0.251515152 | 0.11627907  | 0.0555556 | 0.4941176 |
| ENSG00000100084 | 0.15868263 |            | 0.15868263 |             | 0.375       | 0.3139535 |           |
| ENSG00000150676 |            | 0.13888889 |            | 0.138888889 |             |           | 0.0888889 |
| ENSG00000125877 |            | 0.08787879 |            | 0.087878788 |             |           | 0.1337209 |
| ENSG00000105879 | 0.25581395 |            | 0.25581395 |             | 0.443181818 | 0.3068182 |           |
| ENSG00000104870 |            | 0.21818182 |            | 0.218181818 |             |           | 0.0639535 |
| ENSG00000171853 |            | 0.42777778 |            | 0.427777778 |             |           | 0.4882353 |
| ENSG00000162408 |            | 0.09090909 |            | 0.090909091 |             |           | 0.2888889 |
| ENSG00000073734 |            | 0.49090909 |            | 0.490909091 |             |           | 0.494186  |
| ENSG00000198898 |            | 0.46341463 |            | 0.463414634 |             |           | 0.494186  |
| ENSG00000142676 | 0.05232558 | 0.35454545 | 0.05232558 | 0.354545455 |             |           | 0.4011628 |
| ENSG00000197301 |            | 0.15151515 |            | 0.151515152 |             |           | 0.3411765 |
| ENSG00000160161 |            | 0.16666667 |            | 0.166666667 |             |           |           |
| ENSG00000082397 | 0.22155689 | 0.06666667 | 0.22155689 | 0.066666667 | 0.095238095 | 0.1       | 0.1       |
| ENSG00000151474 | 0.08982036 | 0.41515152 | 0.08982036 | 0.415151515 | 0.142857143 | 0.127907  | 0.494186  |



|                |            |            |            |             |             |           |           |
|----------------|------------|------------|------------|-------------|-------------|-----------|-----------|
| ENSG0000076053 | 0.38622754 | 0.48888889 | 0.38622754 | 0.48888889  | 0.196428571 | 0.122093  | 0.4883721 |
| ENSG0000161533 | 0.07784431 | 0.34242424 | 0.07784431 | 0.34242424  | 0.168674699 | 0.1337209 | 0.3139535 |
| ENSG0000224940 | 0.37125749 |            | 0.37125749 |             | 0.44047619  | 0.4825581 |           |
| ENSG0000186174 |            | 0.39329268 |            | 0.39329268  |             |           | 0.2325581 |
| ENSG0000078747 | 0.30538922 | 0.45454545 | 0.30538922 | 0.45454545  | 0.458333333 | 0.3546512 | 0.3546512 |
| ENSG0000164346 | 0.36666667 |            | 0.36666667 |             | 0.170454545 | 0.1666667 |           |
| ENSG0000100422 | 0.1257485  | 0.40449438 | 0.1257485  | 0.40449438  | 0.05952381  |           | 0.4825581 |
| ENSG0000204822 | 0.14759036 |            | 0.14759036 |             |             |           |           |
| ENSG0000204209 | 0.40555556 |            | 0.40555556 |             | 0.466666667 | 0.3488372 |           |
| ENSG0000100938 | 0.1627907  | 0.05151515 | 0.1627907  | 0.05151515  | 0.172619048 | 0.1976744 |           |
| ENSG0000128641 |            |            |            |             |             |           | 0.0697674 |
| ENSG0000105983 | 0.10479042 | 0.48787879 | 0.10479042 | 0.48787878  | 0.142857143 | 0.1686047 | 0.4709302 |
| ENSG0000151640 |            |            |            |             |             |           | 0.4204545 |
| ENSG0000204616 |            | 0.38484848 |            | 0.38484848  |             |           | 0.2159091 |
| ENSG0000072958 |            | 0.23033708 |            | 0.230337079 |             |           | 0.125     |
| ENSG0000214413 |            | 0.05182927 |            | 0.051829268 |             |           |           |
| ENSG0000112511 |            | 0.12222222 |            | 0.12222222  |             |           |           |
| ENSG0000061492 | 0.12951807 |            | 0.12951807 |             |             |           |           |
| ENSG0000167634 | 0.12874251 |            | 0.12874251 |             | 0.361445783 | 0.3895349 |           |
| ENSG0000109208 | 0.3502994  |            | 0.3502994  |             |             |           |           |
| ENSG0000167595 | 0.23353293 | 0.49393939 | 0.23353293 | 0.49393939  | 0.339285714 | 0.3546512 | 0.4767442 |
| ENSG0000166439 |            | 0.44512195 |            | 0.44512195  |             |           | 0.2272727 |
| ENSG0000125409 | 0.11077844 | 0.47878788 | 0.11077844 | 0.478787879 | 0.273809524 | 0.2142857 | 0.4186047 |
| ENSG0000141198 |            | 0.34659091 |            | 0.346590909 |             |           | 0.1022727 |
| ENSG0000166900 | 0.39820359 | 0.06363636 | 0.39820359 | 0.06363636  |             | 0.1084337 | 0.0755814 |
| ENSG0000197808 | 0.22155689 |            | 0.22155689 |             | 0.21686747  | 0.1511628 |           |
| ENSG0000105771 | 0.27108434 | 0.20121951 | 0.27108434 | 0.20121951  | 0.303571429 | 0.0823529 | 0.0903614 |
| ENSG0000163673 |            | 0.22727273 |            | 0.227272727 |             |           | 0.3255814 |
| ENSG0000058799 | 0.27840909 |            | 0.27840909 |             | 0.25        | 0.2954545 | 0.1104651 |
| ENSG0000172818 | 0.30838323 | 0.21818182 | 0.30838323 | 0.21818181  | 0.416666667 | 0.4593023 | 0.0523256 |
| ENSG0000101981 |            | 0.1402439  |            | 0.140243902 |             |           |           |
| ENSG0000215252 |            |            |            |             |             |           | 0.4186047 |
| ENSG0000118922 |            | 0.18787879 |            | 0.187878788 |             |           | 0.3588235 |
| ENSG0000198821 |            | 0.13793103 |            | 0.137931034 |             |           | 0.3295455 |
| ENSG0000132670 | 0.29041916 |            | 0.29041916 |             | 0.119047619 | 0.1686047 |           |
| ENSG0000177627 |            | 0.5        |            | 0.5         |             |           | 0.2954545 |
| ENSG0000088832 |            | 0.4        |            | 0.4         |             |           | 0.122093  |
| ENSG0000104812 | 0.29341317 | 0.1030303  | 0.29341317 | 0.103030303 | 0.238095238 | 0.2383721 | 0.0755814 |
| ENSG0000170917 | 0.16167665 | 0.28963415 | 0.16167665 | 0.289634146 | 0.077380952 | 0.0697674 | 0.4767442 |
| ENSG0000148943 |            | 0.27011494 |            | 0.270114943 |             |           | 0.4431818 |
| ENSG0000064205 |            | 0.34848485 |            | 0.348484848 |             |           | 0.2267442 |
| ENSG0000144504 | 0.06896552 | 0.26363636 | 0.06896552 | 0.26363636  |             |           | 0.2732558 |
| ENSG0000203995 | 0.08383234 |            | 0.08383234 |             | 0.279761905 | 0.2848837 |           |
| ENSG0000166069 |            | 0.23170732 |            | 0.231707317 |             |           | 0.1686047 |
| ENSG0000205352 |            |            |            |             |             |           | 0.1363636 |
| ENSG0000256043 |            | 0.42727273 |            | 0.427272727 |             |           | 0.2790698 |
| ENSG0000184719 | 0.23652695 | 0.37575758 | 0.23652695 | 0.375757576 | 0.5         | 0.3823529 | 0.4360465 |
| ENSG0000131373 | 0.08536585 | 0.08231707 | 0.08536585 | 0.082317073 | 0.339285714 | 0.3352941 | 0.2       |
| ENSG0000119392 | 0.44207317 | 0.20606061 | 0.44207317 | 0.206060606 | 0.385542169 | 0.4529412 | 0.3255814 |
| ENSG0000185386 |            | 0.2969697  |            | 0.296969697 |             |           | 0.3139535 |
| ENSG0000144339 | 0.21556886 | 0.13030303 | 0.21556886 | 0.13030303  |             |           |           |
| ENSG0000165509 | 0.37048193 |            | 0.37048193 |             | 0.5         | 0.5       |           |
| ENSG0000162493 |            | 0.34848485 |            | 0.348484848 |             |           | 0.2151163 |
| ENSG0000145681 |            | 0.33536585 |            | 0.335365854 |             |           | 0.3666667 |

|                        |            |            |            |             |             |  |           |           |
|------------------------|------------|------------|------------|-------------|-------------|--|-----------|-----------|
| <b>ENSG00000139899</b> | 0.31437126 |            | 0.31437126 |             | 0.327380952 |  | 0.2383721 |           |
| <b>ENSG00000198339</b> |            |            |            |             |             |  |           | 0.2882353 |
| <b>ENSG00000142233</b> |            | 0.24242424 |            | 0.24242424  |             |  |           | 0.3647059 |
| <b>ENSG00000153495</b> | 0.33832335 |            | 0.33832335 |             | 0.220238095 |  | 0.3255814 |           |
| <b>ENSG00000196209</b> |            | 0.1954023  |            | 0.195402299 |             |  |           | 0.3895349 |
| <b>ENSG00000000460</b> | 0.28484848 | 0.11666667 | 0.28484848 | 0.116666667 | 0.319277108 |  | 0.3662791 |           |
| <b>ENSG00000138134</b> | 0.31137725 | 0.49390244 | 0.31137725 | 0.493902439 | 0.416666667 |  | 0.3604651 | 0.122093  |
| <b>ENSG00000128408</b> | 0.19461078 |            | 0.19461078 |             | 0.481927711 |  | 0.4176471 |           |
| <b>ENSG00000171885</b> |            | 0.36666667 |            | 0.366666667 |             |  |           | 0.4318182 |
| <b>ENSG00000133111</b> |            | 0.16049383 |            | 0.160493827 |             |  |           | 0.2325581 |
| <b>ENSG00000204574</b> |            |            |            |             |             |  | 0.0523256 | 0.0523256 |
| <b>ENSG00000130511</b> |            | 0.33636364 |            | 0.336363636 |             |  |           | 0.25      |
| <b>ENSG00000171132</b> |            | 0.16363636 |            | 0.163636364 |             |  |           | 0.2732558 |
| <b>ENSG00000147036</b> |            | 0.16292135 |            | 0.162921348 |             |  |           |           |
| <b>ENSG00000184916</b> |            | 0.13636364 |            | 0.136363636 |             |  |           | 0.1860465 |
| <b>ENSG00000163113</b> | 0.3742515  |            | 0.3742515  |             | 0.244047619 |  | 0.4186047 | 0.1337209 |
| <b>ENSG00000167107</b> |            | 0.32183908 |            | 0.32183908  |             |  |           | 0.125     |
| <b>ENSG00000015532</b> |            | 0.46511628 |            | 0.465116279 |             |  |           | 0.1363636 |
| <b>ENSG00000120733</b> |            | 0.4375     |            | 0.4375      |             |  |           | 0.4659091 |
| <b>ENSG00000141946</b> |            |            |            |             |             |  |           | 0.4244186 |
| <b>ENSG00000116132</b> | 0.08682635 | 0.27878788 | 0.08682635 | 0.278787879 | 0.083333333 |  | 0.122093  | 0.2093023 |
| <b>ENSG00000165678</b> | 0.26704545 | 0.165625   | 0.26704545 | 0.165625    |             |  |           |           |
| <b>ENSG00000186908</b> | 0.23353293 | 0.22121212 | 0.23353293 | 0.221212121 | 0.226190476 |  | 0.1744186 |           |
| <b>ENSG00000189120</b> | 0.26047904 | 0.34848485 | 0.26047904 | 0.348484848 |             |  |           |           |
| <b>ENSG00000109458</b> |            | 0.35365854 |            | 0.353658537 |             |  |           |           |
| <b>ENSG00000108465</b> |            | 0.3255814  |            | 0.325581395 |             |  |           | 0.3863636 |
| <b>ENSG00000152256</b> | 0.38333333 |            | 0.38333333 |             | 0.222222222 |  | 0.1818182 | 0.1802326 |
| <b>ENSG00000171988</b> |            | 0.48888889 |            | 0.488888889 |             |  |           | 0.4659091 |
| <b>ENSG00000127412</b> |            | 0.08181818 |            | 0.081818182 |             |  |           |           |
| <b>ENSG00000168350</b> |            | 0.13109756 |            | 0.131097561 |             |  |           | 0.0988372 |
| <b>ENSG00000139437</b> |            | 0.11280488 |            | 0.112804878 |             |  |           | 0.0882353 |
| <b>ENSG00000125733</b> |            | 0.17272727 |            | 0.172727273 |             |  |           | 0.2034884 |
| <b>ENSG00000243135</b> |            | 0.22777778 |            | 0.227777778 |             |  |           | 0.1590909 |
| <b>ENSG00000154928</b> | 0.23493976 | 0.15243902 | 0.23493976 | 0.152439024 | 0.125       |  | 0.0813953 |           |
| <b>ENSG00000164418</b> |            | 0.11111111 |            | 0.111111111 |             |  |           |           |
| <b>ENSG00000163376</b> |            | 0.16975309 |            | 0.169753086 |             |  |           |           |
| <b>ENSG00000111642</b> |            |            |            |             |             |  |           | 0.2906977 |
| <b>ENSG00000197948</b> | 0.35628743 | 0.43865031 | 0.35628743 | 0.438650307 | 0.232142857 |  | 0.2209302 | 0.2209302 |
| <b>ENSG00000102024</b> | 0.2        |            | 0.2        |             | 0.477777778 |  | 0.4545455 |           |
| <b>ENSG00000237440</b> |            | 0.43939394 |            | 0.439393939 |             |  |           | 0.4111111 |
| <b>ENSG00000049247</b> | 0.3742515  |            | 0.3742515  |             | 0.30952381  |  | 0.3372093 |           |
| <b>ENSG00000152518</b> |            | 0.16363636 |            | 0.163636364 |             |  |           |           |
| <b>ENSG00000081041</b> |            | 0.36280488 |            | 0.362804878 |             |  |           | 0.5       |
| <b>ENSG00000197437</b> |            | 0.14242424 |            | 0.142424242 |             |  |           | 0.0639535 |
| <b>ENSG00000197451</b> |            | 0.27575758 |            | 0.275757576 |             |  |           | 0.3588235 |
| <b>ENSG00000197183</b> |            | 0.36363636 |            | 0.363636364 |             |  |           | 0.3197674 |
| <b>ENSG00000127955</b> | 0.10606061 | 0.41717791 | 0.10606061 | 0.417177914 | 0.192771084 |  | 0.3372093 | 0.1046512 |
| <b>ENSG00000159063</b> |            | 0.3        |            | 0.3         |             |  |           | 0.372093  |
| <b>ENSG00000130779</b> | 0.38181818 | 0.33333333 | 0.38181818 | 0.333333333 | 0.345238095 |  | 0.3837209 | 0.4090909 |
| <b>ENSG00000173209</b> | 0.26646707 | 0.14545455 | 0.26646707 | 0.145454545 | 0.375       |  | 0.372093  | 0.372093  |
| <b>ENSG00000135655</b> |            | 0.47222222 |            | 0.472222222 |             |  |           | 0.1931818 |
| <b>ENSG00000173894</b> |            | 0.22121212 |            | 0.221212121 |             |  |           | 0.3953488 |
| <b>ENSG00000167658</b> |            | 0.08484848 |            | 0.084848485 |             |  |           |           |
| <b>ENSG00000214265</b> |            | 0.48181818 |            | 0.481818182 |             |  |           | 0.4651163 |

|                 |            |            |            |             |             |           |           |
|-----------------|------------|------------|------------|-------------|-------------|-----------|-----------|
| ENSG00000111142 | 0.22155689 | 0.11111111 | 0.22155689 | 0.11111111  | 0.196428571 | 0.255814  | 0.1918605 |
| ENSG0000011465  | 0.22666667 |            | 0.22666667 |             |             |           | 0.0609756 |
| ENSG0000073169  |            |            |            |             |             |           | 0.1976744 |
| ENSG00000154640 |            |            |            |             |             |           | 0.1744186 |
| ENSG00000132749 |            | 0.31515152 |            | 0.315151515 |             |           | 0.2325581 |
| ENSG0000086159  | 0.07185629 |            | 0.07185629 |             | 0.494047619 | 0.4825581 |           |
| ENSG00000187323 |            | 0.45426829 |            | 0.454268293 |             |           | 0.4411765 |
| ENSG00000169427 |            | 0.11212121 |            | 0.112121212 |             |           |           |
| ENSG00000167916 |            | 0.24242424 |            | 0.242424242 |             |           | 0.2616279 |
| ENSG00000173124 | 0.44610778 | 0.44047619 | 0.44610778 | 0.44047619  | 0.066666667 |           |           |
| ENSG00000161904 |            | 0.4847561  |            | 0.484756098 |             |           | 0.3       |
| ENSG00000164299 |            | 0.15151515 |            | 0.151515152 |             |           | 0.4512195 |
| ENSG0000088538  |            | 0.19393939 |            | 0.193939394 |             |           | 0.2151163 |
| ENSG00000112246 |            | 0.35093168 |            | 0.350931677 |             |           | 0.4888889 |
| ENSG0000006377  |            |            |            |             |             |           | 0.1395349 |
| ENSG00000119522 |            | 0.14329268 |            | 0.143292683 |             |           | 0.2965116 |
| ENSG00000170088 | 0.27743902 | 0.08231707 | 0.27743902 | 0.082317073 | 0.439759036 | 0.3430233 |           |
| ENSG0000088053  |            | 0.20909091 |            | 0.209090909 |             |           | 0.2616279 |
| ENSG00000215021 |            |            |            |             |             |           | 0.0581395 |
| ENSG00000106524 |            | 0.34242424 |            | 0.342424242 |             |           | 0.4823529 |
| ENSG00000169083 |            | 0.1402439  |            | 0.140243902 |             |           |           |
| ENSG00000182831 |            | 0.42613636 |            | 0.426136364 |             |           | 0.5       |
| ENSG00000249471 |            | 0.47575758 |            | 0.475757576 |             |           | 0.2383721 |
| ENSG00000134283 |            | 0.42222222 |            | 0.422222222 |             |           | 0.4090909 |
| ENSG00000189320 |            | 0.45757576 |            | 0.457575758 |             |           | 0.4476744 |
| ENSG00000163689 |            | 0.06363636 |            | 0.063636364 |             |           | 0.3430233 |
| ENSG00000149507 | 0.08083832 | 0.42424242 | 0.08083832 | 0.424242424 | 0.18452381  | 0.2848837 | 0.4244186 |
| ENSG00000198752 |            | 0.43636364 |            | 0.436363636 |             |           | 0.1337209 |
| ENSG00000115590 |            | 0.12121212 |            | 0.121212121 |             |           | 0.1744186 |
| ENSG00000148660 |            | 0.10555556 |            | 0.105555556 |             |           | 0.1022727 |
| ENSG00000113721 | 0.26966292 | 0.49404762 | 0.26966292 | 0.494047619 | 0.101190476 | 0.0930233 | 0.1104651 |
| ENSG00000185721 |            | 0.37575758 |            | 0.375757576 |             |           |           |
| ENSG00000136819 | 0.19879518 | 0.31212121 | 0.19879518 | 0.312121212 | 0.21686747  | 0.2882353 | 0.2954545 |
| ENSG00000136250 | 0.45508982 | 0.36060606 | 0.45508982 | 0.360606061 | 0.452380952 | 0.4767442 | 0.1860465 |
| ENSG00000128626 | 0.26966292 |            | 0.26966292 |             |             |           |           |
| ENSG0000079805  |            | 0.23636364 |            | 0.236363636 |             |           | 0.4777778 |
| ENSG00000197275 | 0.32634731 | 0.35454545 | 0.32634731 | 0.354545455 | 0.488095238 | 0.4588235 | 0.4825581 |
| ENSG0000085377  | 0.33532934 |            | 0.33532934 |             | 0.06547619  | 0.1162791 | 0.1860465 |
| ENSG00000185634 |            | 0.45454545 |            | 0.454545455 | 0.095238095 |           | 0.2674419 |
| ENSG00000102309 |            | 0.30909091 |            | 0.309090909 |             |           | 0.4647059 |
| ENSG00000111348 |            | 0.11585366 |            | 0.115853659 |             |           |           |
| ENSG00000105355 | 0.13888889 |            | 0.13888889 |             | 0.095238095 | 0.1395349 |           |
| ENSG00000105509 | 0.25157233 | 0.43939394 | 0.25157233 | 0.439393939 |             |           | 0.4470588 |
| ENSG00000140931 |            | 0.45555556 |            | 0.455555556 | 0.380952381 | 0.4418605 | 0.4772727 |
| ENSG00000163947 | 0.26506024 | 0.40606061 | 0.26506024 | 0.406060606 | 0.201219512 | 0.127907  | 0.4767442 |
| ENSG00000164040 |            | 0.27777778 |            | 0.277777778 |             |           | 0.4545455 |
| ENSG00000169981 |            | 0.24848485 |            | 0.248484848 |             |           |           |
| ENSG00000115884 |            | 0.34117647 |            | 0.341176471 |             |           |           |
| ENSG00000187908 | 0.32183908 | 0.18484848 | 0.32183908 | 0.184848485 | 0.261363636 | 0.255814  | 0.3181818 |
| ENSG00000132170 |            | 0.12893082 |            | 0.128930818 |             |           | 0.1707317 |
| ENSG00000106771 |            | 0.49074074 |            | 0.490740741 | 0.303571429 | 0.2790698 | 0.3823529 |
| ENSG00000187535 | 0.28888889 | 0.23939394 | 0.28888889 | 0.239393939 | 0.488888889 | 0.4404762 | 0.4360465 |
| ENSG00000183621 | 0.29640719 |            | 0.29640719 |             | 0.44047619  | 0.4069767 |           |
| ENSG0000007968  |            | 0.4969697  |            | 0.496969697 |             |           | 0.3546512 |

|                |            |            |            |             |             |           |           |
|----------------|------------|------------|------------|-------------|-------------|-----------|-----------|
| ENSG0000091039 |            |            |            |             | 0.166666667 |           | 0.1046512 |
| ENSG0000164506 | 0.37421384 |            | 0.37421384 |             | 0.295180723 | 0.2743902 | 0.2209302 |
| ENSG0000204655 | 0.17365269 | 0.31395349 | 0.17365269 | 0.313953488 |             |           | 0.2       |
| ENSG0000102606 | 0.40060241 | 0.33333333 | 0.40060241 | 0.333333333 | 0.321428571 | 0.4069767 | 0.4127907 |
| ENSG0000205301 |            | 0.22727273 |            | 0.227272727 |             |           | 0.1860465 |
| ENSG0000100320 |            | 0.0969697  |            | 0.096969697 |             |           | 0.0639535 |
| ENSG0000150776 | 0.06287425 | 0.28658537 | 0.06287425 | 0.286585366 | 0.375       | 0.3837209 | 0.4127907 |
| ENSG0000157551 | 0.28947368 | 0.42073171 | 0.28947368 | 0.420731707 | 0.333333333 | 0.4534884 | 0.3409091 |
| ENSG0000220702 |            | 0.1196319  |            | 0.119631902 |             |           | 0.0697674 |
| ENSG0000148400 |            | 0.47852761 |            | 0.478527607 |             |           | 0.2151163 |
| ENSG0000213865 |            |            |            |             |             |           | 0.0568182 |
| ENSG0000211450 |            |            |            |             |             |           | 0.2151163 |
| ENSG0000101850 |            | 0.21818182 |            | 0.218181818 |             |           | 0.4069767 |
| ENSG0000186487 | 0.07784431 | 0.48850575 | 0.07784431 | 0.488505747 | 0.053571429 | 0.0523256 | 0.3444444 |
| ENSG0000088899 | 0.11656442 | 0.35454545 | 0.11656442 | 0.354545455 |             |           | 0.0755814 |
| ENSG0000135643 |            | 0.37195122 |            | 0.37195122  |             |           | 0.4534884 |
| ENSG0000120708 |            | 0.47222222 |            | 0.472222222 |             |           | 0.4222222 |
| ENSG0000143924 | 0.27575758 | 0.12424242 | 0.27575758 | 0.124242424 | 0.487951807 | 0.4470588 | 0.1607143 |
| ENSG0000135637 | 0.19161677 | 0.10365854 | 0.19161677 | 0.103658537 |             |           | 0.1764706 |
| ENSG0000068796 | 0.2797619  |            | 0.2797619  |             | 0.363636364 | 0.3809524 |           |
| ENSG0000100380 |            |            |            |             | 0.073170732 |           | 0.1136364 |
| ENSG0000167754 |            |            |            |             |             |           | 0.0555556 |
| ENSG0000072135 |            | 0.18390805 |            | 0.183908046 |             |           | 0.1511628 |
| ENSG0000089693 | 0.41666667 |            | 0.41666667 |             | 0.317073171 | 0.3125    |           |
| ENSG0000103335 |            | 0.32121212 |            | 0.321212121 |             |           | 0.1036585 |
| ENSG0000167858 | 0.0753012  | 0.49393939 | 0.0753012  | 0.493939394 | 0.488095238 | 0.3662791 | 0.2941176 |
| ENSG0000028277 |            | 0.06666667 |            | 0.066666667 |             |           | 0.0697674 |
| ENSG0000149474 |            | 0.48181818 |            | 0.481818182 | 0.313253012 | 0.2151163 | 0.0523256 |
| ENSG0000156253 |            | 0.46060606 |            | 0.460606061 |             |           | 0.3863636 |
| ENSG0000215244 |            | 0.41818182 |            | 0.418181818 |             |           | 0.3313953 |
| ENSG0000111481 |            | 0.13030303 |            | 0.13030303  |             |           | 0.25      |
| ENSG0000139289 | 0.17065868 | 0.16768293 | 0.17065868 | 0.167682927 | 0.44047619  | 0.4882353 | 0.4302326 |
| ENSG0000165495 | 0.22155689 | 0.5        | 0.22155689 | 0.5         | 0.476190476 | 0.4593023 | 0.3176471 |
| ENSG0000175575 | 0.30239521 |            | 0.30239521 |             | 0.196428571 | 0.1569767 |           |
| ENSG0000138709 | 0.45783133 | 0.35542169 | 0.45783133 | 0.355421687 | 0.422619048 | 0.3705882 | 0.3666667 |
| ENSG0000101654 |            | 0.48484848 |            | 0.484848485 |             |           | 0.1686047 |
| ENSG0000154027 | 0.49101796 | 0.16768293 | 0.49101796 | 0.167682927 | 0.267857143 | 0.3430233 | 0.3117647 |
| ENSG0000141644 |            | 0.1        |            | 0.1         |             |           | 0.0988372 |
| ENSG0000106031 |            | 0.0969697  |            | 0.096969697 |             |           | 0.4418605 |
| ENSG0000150768 | 0.19461078 | 0.30606061 | 0.19461078 | 0.306060606 | 0.375       | 0.3895349 | 0.4       |
| ENSG0000151729 |            |            |            |             | 0.079545455 | 0.1704545 |           |
| ENSG0000107882 |            | 0.40909091 |            | 0.409090909 |             |           | 0.4767442 |
| ENSG0000204709 |            | 0.16666667 |            | 0.166666667 |             |           | 0.4244186 |
| ENSG0000259431 |            |            |            |             | 0.25        | 0.255814  |           |
| ENSG0000135821 |            | 0.49393939 |            | 0.493939394 | 0.422619048 | 0.4127907 | 0.255814  |
| ENSG0000084463 | 0.34730539 |            | 0.34730539 |             | 0.291666667 | 0.2732558 |           |
| ENSG0000135631 |            | 0.28181818 |            | 0.281818182 |             |           | 0.3988095 |
| ENSG0000165806 |            | 0.3030303  |            | 0.303030303 | 0.146341463 | 0.0714286 | 0.4638554 |
| ENSG0000115241 |            | 0.40909091 |            | 0.409090909 |             |           | 0.0988372 |
| ENSG0000241186 | 0.44311377 | 0.37222222 | 0.44311377 | 0.372222222 | 0.369047619 | 0.372093  | 0.1444444 |
| ENSG0000108443 |            | 0.35757576 |            | 0.357575758 |             |           | 0.494186  |
| ENSG0000180884 |            | 0.47575758 |            | 0.475757576 |             |           | 0.4709302 |
| ENSG0000134539 | 0.35       | 0.41158537 | 0.35       | 0.411585366 | 0.5         | 0.375     | 0.4186047 |
| ENSG0000110975 | 0.19101124 | 0.47239264 | 0.19101124 | 0.472392638 | 0.088888889 | 0.0568182 | 0.4476744 |

|                 |            |            |            |             |             |           |           |
|-----------------|------------|------------|------------|-------------|-------------|-----------|-----------|
| ENSG00000139287 |            | 0.12777778 |            | 0.12777778  |             |           | 0.2444444 |
| ENSG00000230453 |            | 0.17987805 |            | 0.179878049 |             |           | 0.1744186 |
| ENSG00000104290 |            | 0.41158537 |            | 0.411585366 |             |           | 0.4886364 |
| ENSG00000162341 |            | 0.43333333 |            | 0.433333333 |             |           | 0.4476744 |
| ENSG00000054282 | 0.06666667 |            | 0.06666667 |             | 0.233333333 |           | 0.3068182 |
| ENSG00000111713 |            | 0.39444444 |            | 0.394444444 |             |           | 0.4886364 |
| ENSG00000253159 |            | 0.20224719 |            | 0.202247191 |             |           | 0.1477273 |
| ENSG00000099219 |            | 0.32424242 |            | 0.324242424 |             |           | 0.4764706 |
| ENSG00000108582 |            | 0.49090909 |            | 0.490909091 |             |           | 0.2764706 |
| ENSG00000100234 |            | 0.28181818 |            | 0.281818182 |             |           | 0.1104651 |
| ENSG00000148484 | 0.23888889 | 0.09756098 | 0.23888889 | 0.097560976 | 0.066666667 |           | 0.0813953 |
| ENSG00000197361 |            | 0.4        |            | 0.4         |             |           | 0.0697674 |
| ENSG00000124253 |            | 0.2969697  |            | 0.296969697 |             |           | 0.2848837 |
| ENSG00000046651 | 0.23952096 |            | 0.23952096 |             | 0.476190476 |           | 0.4593023 |
| ENSG00000158528 |            | 0.48787879 |            | 0.487878788 |             |           | 0.4418605 |
| ENSG00000179148 | 0.16467066 | 0.42121212 | 0.16467066 | 0.421212121 | 0.244047619 | 0.1976744 | 0.3255814 |
| ENSG00000182472 |            | 0.16666667 |            | 0.166666667 |             |           | 0.2383721 |
| ENSG00000165997 |            | 0.36060606 |            | 0.360606061 |             |           | 0.3373494 |
| ENSG00000250091 |            | 0.37272727 |            | 0.372727273 |             |           | 0.1860465 |
| ENSG00000161036 |            |            |            |             |             |           | 0.4761905 |
| ENSG00000169224 | 0.08333333 | 0.16969697 | 0.08333333 | 0.16969697  | 0.355555556 | 0.3409091 | 0.1511628 |
| ENSG00000117971 |            | 0.32424242 |            | 0.324242424 |             |           | 0.4705882 |
| ENSG00000241058 | 0.28143713 |            | 0.28143713 |             | 0.285714286 |           | 0.3255814 |
| ENSG00000110172 | 0.4011976  | 0.26666667 | 0.4011976  | 0.266666667 | 0.377777778 | 0.4058824 | 0.2840909 |
| ENSG00000111907 | 0.31818182 | 0.21875    | 0.31818182 | 0.21875     | 0.411111111 | 0.3372093 | 0.2235294 |
| ENSG00000106336 |            | 0.2030303  |            | 0.203030303 |             |           |           |
| ENSG00000187239 |            | 0.49425287 |            | 0.494252874 |             |           | 0.2954545 |
| ENSG00000128918 | 0.08333333 | 0.46540881 | 0.08333333 | 0.465408805 | 0.133333333 | 0.1       | 0.372093  |
| ENSG00000160679 |            | 0.46060606 |            | 0.460606061 |             |           | 0.3081395 |
| ENSG00000163515 | 0.31111111 | 0.2030303  | 0.31111111 | 0.203030303 |             |           |           |
| ENSG00000143105 | 0.18263473 |            | 0.18263473 |             | 0.267857143 | 0.3313953 |           |
| ENSG00000133030 |            | 0.08888889 |            | 0.088888889 |             |           | 0.1453488 |
| ENSG00000175785 |            | 0.36969697 |            | 0.36969697  |             |           | 0.3546512 |
| ENSG00000180697 | 0.27840909 | 0.41515152 | 0.27840909 | 0.415151515 | 0.3         | 0.2727273 | 0.4244186 |
| ENSG00000156689 | 0.26136364 |            | 0.26136364 |             | 0.409090909 | 0.4204545 |           |
| ENSG00000205085 | 0.21556886 |            | 0.21556886 |             | 0.428571429 | 0.4244186 |           |
| ENSG00000072201 | 0.3        | 0.15730337 | 0.3        | 0.157303371 | 0.375       | 0.3452381 | 0.1976744 |
| ENSG00000198053 |            | 0.3        |            | 0.3         |             |           | 0.3895349 |
| ENSG00000204713 |            | 0.12121212 |            | 0.121212121 | 0.407407407 | 0.4880952 | 0.1511628 |
| ENSG00000170484 |            | 0.31818182 |            | 0.318181818 |             |           | 0.3888889 |
| ENSG00000049449 | 0.19444444 | 0.48333333 | 0.19444444 | 0.483333333 | 0.244186047 | 0.2954545 | 0.2386364 |
| ENSG00000136573 | 0.30120482 | 0.48780488 | 0.30120482 | 0.487804878 | 0.238095238 | 0.2965116 |           |
| ENSG00000143850 |            | 0.48484848 |            | 0.484848485 |             |           | 0.4318182 |
| ENSG00000100170 |            | 0.49090909 |            | 0.490909091 |             |           | 0.2848837 |
| ENSG00000211695 | 0.23053892 |            | 0.23053892 |             | 0.458333333 | 0.5       |           |
| ENSG00000140948 |            | 0.44099379 |            | 0.440993789 |             |           | 0.4883721 |
| ENSG00000229676 | 0.28089888 | 0.10606061 | 0.28089888 | 0.106060606 |             |           | 0.2209302 |
| ENSG00000157827 | 0.075      | 0.45757576 | 0.075      | 0.457575758 |             |           | 0.2710843 |
| ENSG00000240764 |            | 0.20224719 |            | 0.202247191 |             |           | 0.1477273 |
| ENSG00000178999 |            | 0.1030303  |            | 0.103030303 |             |           | 0.3546512 |
| ENSG00000156738 |            | 0.46666667 |            | 0.466666667 |             |           | 0.4418605 |
| ENSG00000166526 |            | 0.33333333 |            | 0.333333333 |             |           | 0.494186  |
| ENSG00000139746 |            | 0.48484848 |            | 0.484848485 |             |           | 0.494186  |
| ENSG00000104497 | 0.43888889 | 0.37878788 | 0.43888889 | 0.378787879 | 0.380952381 | 0.4186047 | 0.4431818 |

|                 |            |            |            |             |             |           |           |
|-----------------|------------|------------|------------|-------------|-------------|-----------|-----------|
| ENSG00000230786 | 0.24444444 | 0.22424242 | 0.24444444 | 0.22424242  | 0.15555556  | 0.1590909 | 0.4360465 |
| ENSG00000160799 |            | 0.29651163 |            | 0.296511628 |             |           | 0.4204545 |
| ENSG00000122121 |            |            |            |             |             |           | 0.4       |
| ENSG00000077009 | 0.37037037 |            | 0.37037037 |             |             |           |           |
| ENSG00000211734 | 0.41573034 |            | 0.41573034 |             | 0.13333333  | 0.125     |           |
| ENSG00000170166 | 0.49401198 | 0.21036585 | 0.49401198 | 0.210365854 | 0.071428571 | 0.1453488 |           |
| ENSG00000135108 |            | 0.46794872 |            | 0.467948718 |             |           | 0.3846154 |
| ENSG00000100429 |            | 0.33536585 |            | 0.335365854 |             |           | 0.1744186 |
| ENSG00000089597 |            |            |            |             |             |           | 0.0529412 |
| ENSG00000162614 |            |            |            |             |             |           | 0.0681818 |
| ENSG00000164976 |            | 0.2        |            | 0.2         | 0.12222222  | 0.125     | 0.35      |
| ENSG00000181135 | 0.20359281 | 0.13939394 | 0.20359281 | 0.139393939 | 0.255952381 | 0.2383721 | 0.2613636 |
| ENSG00000248458 | 0.05120482 |            | 0.05120482 |             | 0.077380952 | 0.0823529 |           |
| ENSG00000214078 | 0.10555556 | 0.18292683 | 0.10555556 | 0.182926829 |             |           | 0.0988372 |
| ENSG00000113658 | 0.42215569 | 0.30182927 | 0.42215569 | 0.301829268 | 0.43452381  | 0.2848837 | 0.2797619 |
| ENSG00000169499 |            | 0.44444444 |            | 0.44444444  |             |           | 0.3571429 |
| ENSG00000149499 |            | 0.32121212 |            | 0.321212121 |             |           |           |
| ENSG00000095203 |            | 0.39090909 |            | 0.390909091 |             |           | 0.1569767 |
| ENSG00000154473 | 0.32335329 |            | 0.32335329 |             | 0.422619048 | 0.3313953 |           |
| ENSG00000185008 | 0.25       | 0.46666667 | 0.25       | 0.46666667  | 0.339285714 | 0.372093  | 0.494186  |
| ENSG00000123415 | 0.32035928 | 0.47058824 | 0.32035928 | 0.470588235 | 0.398809524 | 0.4186047 | 0.4545455 |
| ENSG00000112763 | 0.45508982 | 0.16111111 | 0.45508982 | 0.161111111 | 0.077380952 | 0.0697674 | 0.1802326 |
| ENSG00000196262 |            | 0.38484848 |            | 0.384848485 |             |           | 0.1918605 |
| ENSG00000148344 |            | 0.06097561 |            | 0.06097561  |             |           | 0.3470588 |
| ENSG00000176912 |            | 0.47560976 |            | 0.475609756 |             |           | 0.1627907 |
| ENSG00000141744 | 0.26047904 |            | 0.26047904 |             | 0.416666667 | 0.3941176 |           |
| ENSG00000075975 |            | 0.3969697  |            | 0.396969697 |             |           | 0.1428571 |
| ENSG00000183066 |            | 0.49393939 |            | 0.493939394 |             |           | 0.1818182 |
| ENSG00000116983 |            | 0.44545455 |            | 0.445454545 |             |           | 0.4825581 |
| ENSG00000224982 |            | 0.19393939 |            | 0.193939394 |             |           | 0.3255814 |
| ENSG00000064012 | 0.1741573  | 0.12222222 | 0.1741573  | 0.122222222 |             |           | 0.2965116 |
| ENSG00000169432 | 0.47222222 | 0.12643678 | 0.47222222 | 0.126436782 | 0.05555556  | 0.0888889 | 0.1       |
| ENSG00000147896 |            | 0.24242424 |            | 0.242424242 |             |           | 0.1802326 |
| ENSG00000164144 | 0.12874251 | 0.40909091 | 0.12874251 | 0.409090909 | 0.451807229 | 0.5       | 0.2906977 |
| ENSG00000028137 |            | 0.49689441 |            | 0.49689441  |             |           | 0.4647059 |
| ENSG00000205189 |            | 0.22727273 |            | 0.227272727 |             |           | 0.1882353 |
| ENSG00000180205 | 0.11111111 |            | 0.11111111 |             |             |           |           |
| ENSG00000087157 |            | 0.23636364 |            | 0.236363636 |             |           |           |
| ENSG00000069424 | 0.34444444 | 0.4137931  | 0.34444444 | 0.413793103 | 0.077777778 | 0.0909091 | 0.3181818 |
| ENSG00000204967 |            | 0.05151515 |            | 0.051515152 |             |           | 0.1162791 |
| ENSG00000136449 |            | 0.25757576 |            | 0.257575758 |             |           | 0.1453488 |
| ENSG00000127328 |            | 0.32727273 |            | 0.327272727 |             |           | 0.4360465 |
| ENSG00000198610 | 0.29341317 | 0.09444444 | 0.29341317 | 0.094444444 | 0.166666667 | 0.0697674 |           |
| ENSG00000139350 |            | 0.48181818 |            | 0.481818182 |             |           | 0.4709302 |
| ENSG00000100068 |            | 0.13030303 |            | 0.13030303  | 0.267857143 | 0.2674419 | 0.4318182 |
| ENSG00000145730 | 0.28742515 | 0.38202247 | 0.28742515 | 0.382022472 | 0.351190476 | 0.4011628 | 0.4825581 |
| ENSG00000183023 |            | 0.45454545 |            | 0.454545455 |             |           | 0.4883721 |
| ENSG00000069020 |            | 0.05246914 |            | 0.052469136 |             |           | 0.2571429 |
| ENSG00000196150 |            | 0.38484848 |            | 0.384848485 |             |           | 0.5       |
| ENSG00000196535 |            | 0.4969697  |            | 0.496969697 |             |           | 0.4767442 |
| ENSG00000163633 |            | 0.19090909 |            | 0.190909091 |             |           |           |
| ENSG00000134013 | 0.37777778 | 0.4        | 0.37777778 | 0.4         | 0.44444444  | 0.4545455 | 0.4593023 |
| ENSG00000183379 |            | 0.34848485 |            | 0.348484848 |             |           | 0.3777778 |
| ENSG00000012171 | 0.43939394 |            | 0.43939394 |             |             |           |           |

|                 |            |            |            |             |             |           |           |
|-----------------|------------|------------|------------|-------------|-------------|-----------|-----------|
| ENSG00000137486 | 0.42045455 | 0.13939394 | 0.42045455 | 0.139393939 | 0.488095238 | 0.372093  | 0.3895349 |
| ENSG00000177459 |            | 0.38484848 |            | 0.384848485 |             |           | 0.4767442 |
| ENSG00000161298 | 0.0813253  | 0.23888889 | 0.0813253  | 0.238888889 | 0.493975904 | 0.3953488 | 0.125     |
| ENSG00000150712 |            | 0.22049689 |            | 0.220496894 |             |           | 0.2941176 |
| ENSG00000214353 |            | 0.17272727 |            | 0.172727273 |             |           | 0.1395349 |
| ENSG00000138686 | 0.18181818 | 0.35454545 | 0.18181818 | 0.354545455 | 0.455555556 | 0.4772727 | 0.4888889 |
| ENSG00000115464 |            | 0.17575758 |            | 0.175757576 |             |           | 0.372093  |
| ENSG00000146729 | 0.44382022 | 0.23939394 | 0.44382022 | 0.239393939 | 0.302325581 | 0.3295455 | 0.4069767 |
| ENSG00000101004 |            | 0.46969697 |            | 0.46969697  |             |           | 0.1071429 |
| ENSG00000013293 |            |            |            |             |             |           | 0.2560976 |
| ENSG00000196735 | 0.40184049 | 0.15517241 | 0.40184049 | 0.155172414 | 0.445121951 | 0.4883721 | 0.402439  |
| ENSG00000159921 | 0.09580838 | 0.24242424 | 0.09580838 | 0.242424242 |             |           | 0.3430233 |
| ENSG00000131845 |            | 0.49393939 |            | 0.493939394 |             |           | 0.3139535 |
| ENSG00000145864 |            | 0.32121212 |            | 0.321212121 |             |           | 0.494186  |
| ENSG00000180071 |            | 0.29141104 |            | 0.291411043 |             |           | 0.4390244 |
| ENSG00000105671 | 0.07784431 | 0.45555556 | 0.07784431 | 0.455555556 |             |           | 0.2590361 |
| ENSG00000158270 |            | 0.20552147 |            | 0.205521472 |             |           | 0.3154762 |
| ENSG00000205981 |            | 0.16111111 |            | 0.161111111 |             |           | 0.0568182 |
| ENSG00000077235 |            | 0.17777778 |            | 0.177777778 |             |           |           |
| ENSG00000132846 |            | 0.27575758 |            | 0.275757576 |             |           | 0.3154762 |
| ENSG00000164180 |            | 0.33641975 |            | 0.336419753 |             |           | 0.2926829 |
| ENSG00000105058 |            |            |            |             |             |           | 0.1395349 |
| ENSG00000136155 |            | 0.37272727 |            | 0.372727273 |             |           | 0.4534884 |
| ENSG00000162897 | 0.17365269 | 0.25151515 | 0.17365269 | 0.251515152 | 0.214285714 | 0.1569767 | 0.1511628 |
| ENSG00000172661 | 0.18965517 |            | 0.18965517 |             | 0.088888889 | 0.2045455 |           |
| ENSG00000243335 |            | 0.40229885 |            | 0.402298851 |             |           | 0.4       |
| ENSG00000222009 |            | 0.37777778 |            | 0.377777778 |             |           | 0.4090909 |
| ENSG00000174611 |            | 0.38764045 |            | 0.387640449 |             |           | 0.2045455 |
| ENSG00000161671 |            | 0.23780488 |            | 0.237804878 |             |           | 0.4011628 |
| ENSG00000158786 |            | 0.26060606 |            | 0.260606061 |             |           | 0.2965116 |
| ENSG00000132950 | 0.35534591 | 0.10909091 | 0.35534591 | 0.109090909 |             |           |           |
| ENSG00000152495 |            | 0.40606061 |            | 0.406060606 |             |           | 0.4404762 |
| ENSG00000126860 | 0.24550898 | 0.38787879 | 0.24550898 | 0.387878788 | 0.422619048 | 0.4883721 | 0.4117647 |
| ENSG00000115604 | 0.16666667 | 0.28787879 | 0.16666667 | 0.287878788 |             |           | 0.4186047 |
| ENSG00000135324 |            | 0.16060606 |            | 0.160606061 |             |           | 0.1453488 |
| ENSG00000214694 | 0.31111111 | 0.06666667 | 0.31111111 | 0.066666667 | 0.255555556 | 0.1931818 |           |
| ENSG00000162813 | 0.13473054 |            | 0.13473054 |             |             |           |           |
| ENSG00000181222 |            | 0.37272727 |            | 0.372727273 |             |           | 0.4360465 |
| ENSG00000090686 | 0.0508982  | 0.3        | 0.0508982  | 0.3         | 0.420731707 | 0.4470588 | 0.3953488 |
| ENSG00000100350 |            | 0.23333333 |            | 0.233333333 |             |           | 0.3181818 |
| ENSG00000198393 | 0.35955056 |            | 0.35955056 |             | 0.188888889 | 0.1477273 |           |
| ENSG00000103740 | 0.17065868 | 0.48170732 | 0.17065868 | 0.481707317 | 0.160714286 | 0.1744186 | 0.2790698 |
| ENSG00000137764 | 0.35329341 | 0.21515152 | 0.35329341 | 0.215151515 | 0.202380952 | 0.2732558 | 0.4825581 |
| ENSG00000231852 |            | 0.0875     |            | 0.0875      |             |           |           |
| ENSG00000151093 |            | 0.16060606 |            | 0.160606061 |             |           | 0.122093  |
| ENSG00000048342 |            | 0.36363636 |            | 0.363636364 |             |           | 0.4186047 |
| ENSG00000153707 | 0.26875    | 0.05       | 0.26875    | 0.05        | 0.107142857 | 0.0888889 |           |
| ENSG00000118600 |            | 0.06024096 |            | 0.060240964 |             |           | 0.3068182 |
| ENSG00000109133 |            | 0.27878788 |            | 0.278787879 |             |           |           |
| ENSG00000135457 | 0.23053892 | 0.25151515 | 0.23053892 | 0.251515152 | 0.285714286 | 0.2209302 | 0.4011628 |
| ENSG00000183665 | 0.17365269 |            | 0.17365269 |             | 0.101190476 | 0.1627907 | 0.2386364 |
| ENSG00000023318 |            | 0.45757576 |            | 0.457575758 |             |           | 0.0639535 |
| ENSG00000152910 |            | 0.25454545 |            | 0.254545455 |             |           | 0.122093  |
| ENSG00000100453 | 0.35329341 | 0.22424242 | 0.35329341 | 0.224242424 | 0.267857143 | 0.2383721 | 0.2674419 |

|                 |            |            |            |             |             |           |           |
|-----------------|------------|------------|------------|-------------|-------------|-----------|-----------|
| ENSG00000141934 |            | 0.26687117 |            | 0.266871166 |             |           | 0.1428571 |
| ENSG00000188613 |            |            |            |             |             |           | 0.1337209 |
| ENSG00000160221 |            | 0.18484848 |            | 0.184848485 |             |           | 0.2093023 |
| ENSG00000169314 |            |            |            |             | 0.107142857 | 0.0697674 |           |
| ENSG00000183439 |            | 0.3445122  |            | 0.344512195 |             |           | 0.3988095 |
| ENSG00000134575 | 0.38787879 | 0.37878788 | 0.38787879 | 0.378787879 | 0.297619048 | 0.2616279 | 0.3863636 |
| ENSG00000156958 |            | 0.24242424 |            | 0.242424242 | 0.107142857 | 0.0755814 | 0.0523256 |
| ENSG00000133739 |            | 0.35714286 |            | 0.357142857 |             |           | 0.3869048 |
| ENSG00000132002 |            | 0.18404908 |            | 0.18404908  |             |           |           |
| ENSG00000046889 |            | 0.38068182 |            | 0.380681818 |             |           | 0.5       |
| ENSG00000214050 |            | 0.28089888 |            | 0.280898876 |             |           | 0.3295455 |
| ENSG00000166394 | 0.21257485 | 0.33841463 | 0.21257485 | 0.338414634 |             |           | 0.1337209 |
| ENSG00000101190 |            | 0.29754601 |            | 0.297546012 |             |           | 0.0952381 |
| ENSG00000102384 | 0.20481928 | 0.3        | 0.20481928 | 0.3         | 0.267857143 | 0.25      | 0.2383721 |
| ENSG00000130513 |            | 0.14848485 |            | 0.148484848 |             |           | 0.1976744 |
| ENSG00000186073 | 0.49438202 | 0.16768293 | 0.49438202 | 0.167682927 | 0.454545455 | 0.4545455 | 0.1036585 |
| ENSG00000173531 |            | 0.25757576 |            | 0.257575758 |             |           | 0.0833333 |
| ENSG00000179562 |            | 0.19393939 |            | 0.193939394 |             |           | 0.3       |
| ENSG00000203867 |            | 0.09090909 |            | 0.090909091 |             |           | 0.2823529 |
| ENSG00000186017 |            | 0.29411765 |            | 0.294117647 |             |           | 0.1627907 |
| ENSG00000125898 | 0.38764045 | 0.35151515 | 0.38764045 | 0.351515152 | 0.056818182 |           | 0.3023256 |
| ENSG00000135903 |            | 0.18484848 |            | 0.184848485 |             |           | 0.2034884 |
| ENSG00000164935 |            | 0.11212121 |            | 0.112121212 |             |           | 0.0755814 |
| ENSG00000132780 |            | 0.4375     |            | 0.4375      |             | 0.0909091 | 0.3372093 |
| ENSG00000205821 | 0.33532934 |            | 0.33532934 |             |             |           |           |
| ENSG00000115468 | 0.25449102 | 0.33030303 | 0.25449102 | 0.33030303  | 0.172619048 | 0.25      | 0.4709302 |
| ENSG00000203685 |            | 0.46666667 |            | 0.466666667 |             |           | 0.4186047 |
| ENSG00000127419 | 0.36666667 | 0.11818182 | 0.36666667 | 0.118181818 | 0.351190476 | 0.2965116 | 0.122093  |
| ENSG00000040341 | 0.17964072 | 0.22727273 | 0.17964072 | 0.227272727 |             |           | 0.494186  |
| ENSG00000101435 | 0.19760479 |            | 0.19760479 |             | 0.464285714 | 0.4360465 |           |
| ENSG00000116685 |            | 0.43636364 |            | 0.436363636 |             |           | 0.3430233 |
| ENSG00000214688 |            | 0.23619632 |            | 0.236196319 |             |           | 0.4360465 |
| ENSG00000116584 | 0.14071856 |            | 0.14071856 |             | 0.160714286 | 0.1569767 |           |
| ENSG00000152669 | 0.31097561 |            | 0.31097561 |             | 0.317073171 | 0.2375    |           |
| ENSG00000198108 |            |            |            |             |             |           | 0.2267442 |
| ENSG00000074181 |            | 0.26060606 |            | 0.260606061 |             |           | 0.375     |
| ENSG00000196242 | 0.20481928 |            | 0.20481928 |             | 0.113095238 | 0.0988372 |           |
| ENSG00000143140 | 0.1011236  | 0.27575758 | 0.1011236  | 0.275757576 |             |           | 0.4709302 |
| ENSG00000173349 | 0.42987805 |            | 0.42987805 |             | 0.357142857 | 0.25      |           |
| ENSG00000241697 |            | 0.05       |            | 0.05        |             |           | 0.1704545 |
| ENSG00000159388 |            | 0.07575758 |            | 0.075757576 |             |           |           |
| ENSG00000140406 |            | 0.05       |            | 0.05        |             |           |           |
| ENSG00000065029 |            | 0.18965517 |            | 0.189655172 |             |           | 0.4127907 |
| ENSG00000179115 | 0.12275449 |            | 0.12275449 |             | 0.160714286 | 0.1627907 |           |
| ENSG00000070214 | 0.37640449 | 0.13333333 | 0.37640449 | 0.133333333 |             |           |           |
| ENSG00000106829 | 0.18263473 |            | 0.18263473 |             | 0.244047619 | 0.3176471 |           |
| ENSG00000140464 |            | 0.48484848 |            | 0.484848485 |             |           | 0.3372093 |
| ENSG00000172478 | 0.15868263 | 0.46969697 | 0.15868263 | 0.46969697  | 0.477777778 | 0.3313953 | 0.4011628 |
| ENSG00000103994 |            | 0.1        |            | 0.1         |             |           | 0.1477273 |
| ENSG00000142698 | 0.05120482 | 0.48181818 | 0.05120482 | 0.481818182 | 0.25        | 0.3023256 | 0.4476744 |
| ENSG00000169964 |            | 0.3        |            | 0.3         |             |           |           |
| ENSG00000105497 | 0.34659091 | 0.35       | 0.34659091 | 0.35        | 0.220238095 | 0.2674419 | 0.304878  |
| ENSG00000140254 | 0.32934132 |            | 0.32934132 |             | 0.488095238 | 0.4825581 | 0.0697674 |
| ENSG00000136514 |            | 0.35757576 |            | 0.357575758 |             |           | 0.2383721 |



|                 |            |            |            |             |             |           |           |
|-----------------|------------|------------|------------|-------------|-------------|-----------|-----------|
| ENSG00000118200 |            | 0.19393939 |            | 0.193939394 |             |           | 0.4825581 |
| ENSG00000253537 |            | 0.20224719 |            | 0.202247191 |             |           | 0.1477273 |
| ENSG00000084444 |            | 0.15243902 |            | 0.152439024 |             |           |           |
| ENSG00000174840 |            | 0.31707317 |            | 0.317073171 |             |           | 0.0930233 |
| ENSG00000141664 |            | 0.22121212 |            | 0.221212121 |             |           | 0.3139535 |
| ENSG00000164305 |            | 0.48295455 |            | 0.482954545 |             |           | 0.1890244 |
| ENSG00000173889 |            | 0.42987805 |            | 0.429878049 |             |           | 0.4186047 |
| ENSG00000065989 |            | 0.37272727 |            | 0.372727273 |             |           | 0.5       |
| ENSG00000197375 |            | 0.39090909 |            | 0.390909091 |             |           | 0.2616279 |
| ENSG00000104112 | 0.0872093  | 0.4702381  | 0.0872093  | 0.470238095 | 0.113095238 | 0.1511628 | 0.3658537 |
| ENSG00000026508 |            | 0.3404908  |            | 0.340490798 |             |           | 0.4476744 |
| ENSG00000174943 |            | 0.42236025 |            | 0.422360248 |             |           | 0.2916667 |
| ENSG00000163453 |            | 0.16768293 |            | 0.167682927 |             |           |           |
| ENSG00000161203 |            | 0.45731707 |            | 0.457317073 |             |           | 0.3882353 |
| ENSG00000183876 | 0.17045455 | 0.08841463 | 0.17045455 | 0.088414634 | 0.1         | 0.0888889 |           |
| ENSG00000255529 | 0.4491018  | 0.2        | 0.4491018  | 0.2         | 0.416666667 | 0.4883721 | 0.4244186 |
| ENSG00000112365 |            | 0.38484848 |            | 0.384848485 |             |           | 0.3953488 |
| ENSG00000157800 | 0.26946108 | 0.39444444 | 0.26946108 | 0.394444444 | 0.19047619  | 0.1162791 | 0.1477273 |
| ENSG00000204843 | 0.43712575 |            | 0.43712575 |             | 0.5         | 0.4761905 |           |
| ENSG00000099960 |            |            |            |             |             |           | 0.4886364 |
| ENSG00000080608 |            |            |            |             |             | 0.1       |           |
| ENSG00000119661 |            | 0.08841463 |            | 0.088414634 |             |           | 0.3647059 |
| ENSG00000082781 |            | 0.36931818 |            | 0.369318182 |             |           | 0.4555556 |
| ENSG00000003400 | 0.38922156 | 0.44444444 | 0.38922156 | 0.444444444 |             |           | 0.1477273 |
| ENSG00000107438 |            | 0.23033708 |            | 0.230337079 |             |           | 0.1363636 |
| ENSG00000075407 | 0.48795181 | 0.23333333 | 0.48795181 | 0.233333333 | 0.427710843 | 0.4825581 | 0.1590909 |
| ENSG00000108064 | 0.26946108 | 0.39393939 | 0.26946108 | 0.393939394 | 0.19047619  | 0.1569767 | 0.4352941 |
| ENSG00000128699 | 0.35151515 | 0.24444444 | 0.35151515 | 0.244444444 | 0.071428571 | 0.0523256 | 0.2616279 |
| ENSG00000159461 |            | 0.4054878  |            | 0.405487805 |             |           | 0.4186047 |
| ENSG00000149182 |            | 0.46363636 |            | 0.463636364 |             |           | 0.2705882 |
| ENSG00000061676 |            | 0.32121212 |            | 0.321212121 |             |           | 0.1686047 |
| ENSG00000103671 |            | 0.14242424 |            | 0.142424242 |             |           |           |
| ENSG00000186918 | 0.31666667 | 0.41515152 | 0.31666667 | 0.415151515 | 0.488888889 | 0.4333333 | 0.3295455 |
| ENSG00000197696 |            | 0.39393939 |            | 0.393939394 |             |           | 0.1104651 |
| ENSG00000165629 |            | 0.33030303 |            | 0.33030303  |             |           | 0.2616279 |
| ENSG00000128513 |            | 0.28881988 |            | 0.288819876 |             |           | 0.3430233 |
| ENSG00000100347 | 0.20555556 |            | 0.20555556 |             | 0.077777778 |           |           |
| ENSG00000142875 |            | 0.40449438 |            | 0.404494382 |             |           | 0.4431818 |
| ENSG00000131668 |            | 0.3969697  |            | 0.396969697 |             |           | 0.2267442 |
| ENSG00000161547 |            |            |            |             | 0.493975904 | 0.4883721 |           |
| ENSG00000162881 |            | 0.47777778 |            | 0.477777778 |             |           | 0.3666667 |
| ENSG00000080189 |            |            |            |             | 0.077777778 | 0.0795455 |           |
| ENSG00000129167 |            |            |            |             | 0.113636364 | 0.1022727 |           |
| ENSG00000204542 |            | 0.33333333 |            | 0.333333333 |             |           |           |
| ENSG00000151503 | 0.16167665 | 0.35454545 | 0.16167665 | 0.354545455 | 0.416666667 | 0.494186  | 0.494186  |
| ENSG00000176390 |            | 0.11111111 |            | 0.111111111 |             |           | 0.2674419 |
| ENSG00000013441 |            | 0.06666667 |            | 0.066666667 |             |           |           |
| ENSG00000157219 | 0.39325843 | 0.30606061 | 0.39325843 | 0.306060606 | 0.488888889 | 0.5       | 0.1931818 |
| ENSG00000137033 |            | 0.32317073 |            | 0.323170732 |             |           | 0.4011628 |
| ENSG00000065618 |            | 0.22670807 |            | 0.226708075 |             |           | 0.244186  |
| ENSG00000175697 |            | 0.32926829 |            | 0.329268293 |             |           | 0.3941176 |
| ENSG00000179292 |            | 0.10606061 |            | 0.106060606 |             |           | 0.1860465 |
| ENSG00000197472 |            | 0.44252874 |            | 0.442528736 |             |           | 0.4659091 |
| ENSG00000160796 | 0.25       |            | 0.25       |             | 0.470238095 | 0.4302326 |           |

|                 |            |            |            |             |             |           |               |
|-----------------|------------|------------|------------|-------------|-------------|-----------|---------------|
| ENSG00000104946 | 0.40361446 |            | 0.40361446 |             | 0.243902439 |           | 0.2352941     |
| ENSG0000043093  |            | 0.33333333 |            | 0.33333333  | 0.220238095 |           | 0.2209302 0.5 |
| ENSG00000132681 | 0.11144578 |            | 0.11144578 |             | 0.339285714 |           | 0.2732558     |
| ENSG00000214944 |            | 0.35057471 |            | 0.350574713 |             |           | 0.4204545     |
| ENSG00000115652 | 0.3988764  | 0.21348315 | 0.3988764  | 0.213483146 | 0.455555556 | 0.4666667 | 0.4222222     |
| ENSG00000143549 | 0.1257485  | 0.09444444 | 0.1257485  | 0.094444444 | 0.053571429 |           | 0.4333333     |
| ENSG00000166147 | 0.31137725 | 0.27439024 | 0.31137725 | 0.274390244 | 0.214285714 | 0.3928571 | 0.4882353     |
| ENSG00000119681 |            | 0.43939394 |            | 0.439393939 |             |           | 0.2093023     |
| ENSG00000008988 | 0.41017964 | 0.30555556 | 0.41017964 | 0.305555556 | 0.053571429 |           | 0.0568182     |
| ENSG00000184524 |            | 0.45757576 |            | 0.457575758 |             |           | 0.2616279     |
| ENSG00000104979 |            | 0.26923077 |            | 0.269230769 |             |           | 0.4069767     |
| ENSG00000187556 | 0.24850299 |            | 0.24850299 |             | 0.31547619  |           | 0.3255814     |
| ENSG00000167186 |            | 0.19318182 |            | 0.193181818 |             |           | 0.0795455     |
| ENSG00000160181 |            | 0.35454545 |            | 0.354545455 |             |           | 0.25          |
| ENSG00000197008 | 0.07784431 | 0.40909091 | 0.07784431 | 0.409090909 | 0.148809524 | 0.2111111 | 0.4868421     |
| ENSG00000166140 | 0.42352941 | 0.35757576 | 0.42352941 | 0.357575758 | 0.178571429 | 0.2325581 | 0.3546512     |
| ENSG00000160844 |            | 0.26111111 |            | 0.261111111 |             |           | 0.4090909     |
| ENSG00000086696 | 0.36144578 |            | 0.36144578 |             | 0.5         |           | 0.3705882     |
| ENSG00000249624 |            | 0.25757576 |            | 0.257575758 |             |           | 0.4882353     |
| ENSG00000116266 | 0.28409091 | 0.1969697  | 0.28409091 | 0.196969697 | 0.244444444 | 0.2386364 | 0.246988      |
| ENSG00000167419 | 0.07784431 |            | 0.07784431 |             |             |           |               |
| ENSG00000141524 |            | 0.05792683 |            | 0.057926829 |             |           | 0.1337209     |
| ENSG00000123562 | 0.47222222 | 0.40062112 | 0.47222222 | 0.400621118 | 0.329545455 | 0.3295455 | 0.373494      |
| ENSG00000204381 | 0.12275449 | 0.33333333 | 0.12275449 | 0.333333333 |             |           |               |
| ENSG00000113302 |            | 0.2030303  |            | 0.203030303 |             |           | 0.4418605     |
| ENSG00000090534 | 0.37575758 | 0.4969697  | 0.37575758 | 0.496969697 | 0.487951807 | 0.4294118 | 0.5           |
| ENSG00000146776 |            | 0.5        |            | 0.5         |             |           | 0.3313953     |
| ENSG00000100079 | 0.10429448 |            | 0.10429448 |             |             | 0.255814  |               |
| ENSG00000112078 | 0.47222222 | 0.21348315 | 0.47222222 | 0.213483146 | 0.388888889 | 0.4204545 | 0.4518072     |
| ENSG00000184144 |            | 0.43333333 |            | 0.433333333 |             |           | 0.3662791     |
| ENSG00000188386 |            | 0.11212121 |            | 0.112121212 |             |           | 0.3604651     |
| ENSG00000101331 |            | 0.20786517 |            | 0.207865169 |             |           | 0.1333333     |
| ENSG00000254842 |            | 0.42378049 |            | 0.423780488 |             |           | 0.4593023     |
| ENSG00000075426 |            | 0.48484848 |            | 0.484848485 |             |           | 0.4431818     |
| ENSG00000101966 |            | 0.42331288 |            | 0.423312883 |             |           | 0.3023256     |
| ENSG00000171246 | 0.2005988  | 0.29393939 | 0.2005988  | 0.293939394 |             |           | 0.4529412     |
| ENSG00000112742 | 0.31736527 | 0.14204545 | 0.31736527 | 0.142045455 | 0.433333333 | 0.3313953 |               |
| ENSG00000163161 |            | 0.06666667 |            | 0.066666667 |             |           |               |
| ENSG00000242715 | 0.14371257 | 0.47256098 | 0.14371257 | 0.472560976 | 0.5         | 0.4186047 | 0.2906977     |
| ENSG00000018699 | 0.05389222 |            | 0.05389222 |             |             |           |               |
| ENSG00000103852 |            | 0.14110429 |            | 0.141104294 |             |           | 0.4127907     |
| ENSG00000168724 |            | 0.25454545 |            | 0.254545455 |             |           | 0.4709302     |
| ENSG00000162923 |            | 0.27300613 |            | 0.273006135 |             |           | 0.1453488     |
| ENSG00000125247 | 0.29885057 | 0.31460674 | 0.29885057 | 0.314606742 | 0.369047619 | 0.4111111 | 0.1818182     |
| ENSG00000116857 | 0.16853933 | 0.47256098 | 0.16853933 | 0.472560976 |             |           | 0.3081395     |
| ENSG00000156711 |            | 0.16363636 |            | 0.163636364 |             |           | 0.4651163     |
| ENSG00000196639 | 0.31437126 | 0.22424242 | 0.31437126 | 0.224242424 | 0.077380952 | 0.0697674 | 0.244186      |
| ENSG00000197249 | 0.29861111 | 0.42378049 | 0.29861111 | 0.423780488 | 0.353658537 | 0.4871795 | 0.3604651     |
| ENSG00000066084 |            | 0.36280488 |            | 0.362804878 |             |           | 0.4545455     |
| ENSG00000130940 |            |            |            |             |             |           | 0.0639535     |
| ENSG00000187626 |            | 0.36969697 |            | 0.36969697  | 0.410714286 | 0.3837209 | 0.3837209     |
| ENSG00000058600 |            | 0.28787879 |            | 0.287878788 |             |           | 0.4761905     |
| ENSG00000139178 |            | 0.46296296 |            | 0.462962963 |             |           | 0.4476744     |
| ENSG00000117569 |            | 0.46666667 |            | 0.466666667 |             |           | 0.3882353     |

|                 |            |            |            |             |             |           |           |
|-----------------|------------|------------|------------|-------------|-------------|-----------|-----------|
| ENSG00000213231 |            | 0.49090909 |            | 0.490909091 |             |           | 0.3058824 |
| ENSG00000178538 | 0.48863636 | 0.28220859 | 0.48863636 | 0.282208589 | 0.344444444 | 0.2045455 | 0.3863636 |
| ENSG00000127191 | 0.14848485 |            | 0.14848485 |             | 0.142857143 | 0.0941176 |           |
| ENSG00000172689 |            | 0.46060606 |            | 0.460606061 |             |           | 0.2209302 |
| ENSG00000122085 |            | 0.21515152 |            | 0.215151515 |             |           | 0.4886364 |
| ENSG00000198855 |            | 0.40909091 |            | 0.409090909 |             |           | 0.127907  |
| ENSG00000215018 |            | 0.24545455 |            | 0.245454545 |             |           | 0.2034884 |
| ENSG00000144567 | 0.23913043 | 0.4030303  | 0.23913043 | 0.403030303 | 0.446428571 | 0.4294118 | 0.4294118 |
| ENSG00000175768 |            | 0.2        |            | 0.2         | 0.053571429 |           | 0.122093  |
| ENSG00000135766 | 0.28409091 |            | 0.28409091 |             | 0.477777778 | 0.4883721 |           |
| ENSG00000102796 |            | 0.28181818 |            | 0.281818182 |             |           | 0.255814  |
| ENSG00000065308 |            | 0.49390244 |            | 0.493902439 |             |           | 0.4886364 |
| ENSG00000012061 | 0.37724551 | 0.23939394 | 0.37724551 | 0.239393939 |             |           | 0.4825581 |
| ENSG00000114349 |            | 0.34848485 |            | 0.348484848 |             |           |           |
| ENSG00000131873 |            | 0.47878788 |            | 0.478787879 |             |           | 0.3081395 |
| ENSG00000179299 |            | 0.31818182 |            | 0.318181818 |             |           |           |
| ENSG00000175054 |            | 0.15757576 |            | 0.157575758 |             |           | 0.122093  |
| ENSG00000166965 | 0.4691358  | 0.08536585 | 0.4691358  | 0.085365854 | 0.320512821 | 0.4418605 | 0.4647059 |
| ENSG00000197054 |            | 0.084375   |            | 0.084375    |             | 0.0833333 |           |
| ENSG00000131711 |            | 0.24431818 |            | 0.244318182 |             |           | 0.3953488 |
| ENSG00000114023 |            | 0.43030303 |            | 0.43030303  |             |           | 0.3444444 |
| ENSG00000127884 |            | 0.17575758 |            | 0.175757576 |             |           |           |
| ENSG00000151458 |            | 0.17878788 |            | 0.178787879 |             |           | 0.244186  |
| ENSG00000189410 |            | 0.43292683 |            | 0.432926829 | 0.277777778 | 0.3522727 | 0.1453488 |
| ENSG00000041357 | 0.28313253 | 0.39393939 | 0.28313253 | 0.393939394 | 0.439759036 | 0.4767442 | 0.0988372 |
| ENSG00000118557 | 0.17283951 | 0.48888889 | 0.17283951 | 0.488888889 | 0.054878049 |           | 0.3863636 |
| ENSG00000184428 | 0.47305389 | 0.28484848 | 0.47305389 | 0.284848485 | 0.071428571 | 0.0988372 | 0.3546512 |
| ENSG00000125772 |            | 0.41111111 |            | 0.411111111 |             |           | 0.4666667 |
| ENSG00000196247 | 0.46407186 | 0.1        | 0.46407186 | 0.1         | 0.220238095 | 0.2790698 |           |
| ENSG00000136141 |            | 0.22424242 |            | 0.224242424 |             |           | 0.3837209 |
| ENSG00000140365 |            |            |            |             |             |           | 0.1104651 |
| ENSG00000188004 |            | 0.14545455 |            | 0.145454545 |             |           |           |
| ENSG00000152127 |            | 0.43333333 |            | 0.433333333 |             |           | 0.4888889 |
| ENSG00000154803 | 0.4047619  | 0.3        | 0.4047619  | 0.3         | 0.4         | 0.3522727 | 0.2764706 |
| ENSG00000136243 | 0.11931818 | 0.1196319  | 0.11931818 | 0.119631902 |             |           |           |
| ENSG00000156467 |            | 0.46551724 |            | 0.465517241 |             |           | 0.3522727 |
| ENSG00000103089 | 0.47865854 | 0.17816092 | 0.47865854 | 0.17816092  |             | 0.1162791 |           |
| ENSG00000166979 | 0.48888889 | 0.30792683 | 0.48888889 | 0.307926829 | 0.422222222 | 0.3666667 | 0.3081395 |
| ENSG00000129911 |            | 0.2247191  |            | 0.224719101 |             |           | 0.125     |
| ENSG00000124194 |            | 0.16969697 |            | 0.16969697  |             |           | 0.2616279 |
| ENSG00000120616 |            | 0.13888889 |            | 0.138888889 |             |           | 0.0813953 |
| ENSG00000196924 |            | 0.08536585 |            | 0.085365854 |             |           | 0.1162791 |
| ENSG00000226232 |            |            |            |             | 0.166666667 | 0.1890244 |           |
| ENSG00000162009 |            | 0.42424242 |            | 0.424242424 |             |           | 0.1686047 |
| ENSG00000196498 | 0.19886364 | 0.14606742 | 0.19886364 | 0.146067416 | 0.466666667 | 0.4318182 | 0.0909091 |
| ENSG00000159023 | 0.46407186 | 0.33939394 | 0.46407186 | 0.339393939 | 0.089285714 | 0.0813953 | 0.4476744 |
| ENSG00000180758 |            | 0.4375     |            | 0.4375      |             |           | 0.5       |
| ENSG00000164051 | 0.25149701 |            | 0.25149701 |             | 0.267857143 | 0.3895349 |           |
| ENSG00000006638 |            | 0.17272727 |            | 0.172727273 |             |           |           |
| ENSG00000175832 | 0.0508982  |            | 0.0508982  |             | 0.398809524 | 0.3604651 |           |
| ENSG00000158106 |            | 0.19018405 |            | 0.190184049 |             |           | 0.2209302 |
| ENSG00000166165 |            | 0.38414634 |            | 0.384146341 |             |           | 0.2325581 |
| ENSG00000124795 |            | 0.26966292 |            | 0.269662921 |             |           | 0.2267442 |
| ENSG00000138835 | 0.18562874 | 0.18787879 | 0.18562874 | 0.187878788 |             |           |           |

|                 |            |            |            |             |             |           |           |
|-----------------|------------|------------|------------|-------------|-------------|-----------|-----------|
| ENSG00000177103 | 0.07222222 | 0.37423313 | 0.07222222 | 0.374233129 | 0.306818182 | 0.2333333 | 0.2790698 |
| ENSG00000161570 | 0.41916168 | 0.05151515 | 0.41916168 | 0.051515152 | 0.34939759  | 0.3411765 |           |
| ENSG00000100225 |            | 0.29090909 |            | 0.290909091 |             |           | 0.2848837 |
| ENSG00000172183 | 0.39820359 |            | 0.39820359 |             | 0.208333333 | 0.3255814 |           |
| ENSG00000241404 |            |            |            |             |             |           | 0.0813953 |
| ENSG00000101746 |            | 0.19875776 |            | 0.198757764 |             |           |           |
| ENSG00000156110 | 0.1497006  | 0.24242424 | 0.1497006  | 0.242424242 | 0.385542169 | 0.4418605 | 0.1882353 |
| ENSG00000204282 |            | 0.06666667 |            | 0.066666667 |             |           | 0.1547619 |
| ENSG00000221874 |            | 0.20245399 |            | 0.202453988 |             |           | 0.0697674 |
| ENSG00000091879 | 0.20359281 | 0.38181818 | 0.20359281 | 0.381818182 | 0.154761905 | 0.1627907 | 0.2647059 |
| ENSG00000111358 |            | 0.42727273 |            | 0.427272727 |             |           |           |
| ENSG00000163053 |            | 0.25757576 |            | 0.257575758 |             |           | 0.2790698 |
| ENSG00000171729 | 0.32934132 | 0.465625   | 0.32934132 | 0.465625    | 0.30952381  | 0.3529412 | 0.4337349 |
| ENSG00000255423 |            | 0.46666667 |            | 0.466666667 |             |           | 0.4709302 |
| ENSG00000100441 | 0.16766467 | 0.47575758 | 0.16766467 | 0.475757576 |             |           | 0.2386364 |
| ENSG00000203808 |            | 0.1030303  |            | 0.103030303 |             |           | 0.1453488 |
| ENSG00000103199 |            | 0.38787879 |            | 0.387878788 |             |           | 0.3023256 |
| ENSG00000186288 |            | 0.36046512 |            | 0.360465116 |             |           |           |
| ENSG00000129204 | 0.22222222 | 0.35555556 | 0.22222222 | 0.355555556 | 0.488888889 | 0.4204545 | 0.0764706 |
| ENSG00000196233 |            |            |            |             |             |           | 0.3604651 |
| ENSG00000125731 |            | 0.17272727 |            | 0.172727273 |             |           | 0.1976744 |
| ENSG00000111262 | 0.0873494  | 0.47865854 | 0.0873494  | 0.478658537 | 0.136904762 | 0.1162791 | 0.4011628 |
| ENSG00000196776 |            | 0.48181818 |            | 0.481818182 |             |           | 0.3255814 |
| ENSG00000136048 |            | 0.45882353 |            | 0.458823529 |             |           | 0.3333333 |
| ENSG00000138613 |            | 0.44545455 |            | 0.445454545 |             |           | 0.4593023 |
| ENSG00000103197 |            | 0.11666667 |            | 0.116666667 |             |           |           |
| ENSG00000111700 |            | 0.10555556 |            | 0.105555556 |             |           | 0.3068182 |
| ENSG00000176155 | 0.47891566 | 0.48214286 | 0.47891566 | 0.482142857 | 0.136904762 | 0.1235294 | 0.127907  |
| ENSG00000205765 |            | 0.06363636 |            | 0.063636364 |             |           | 0.0588235 |
| ENSG00000134690 | 0.27245509 | 0.44242424 | 0.27245509 | 0.442424242 | 0.246987952 | 0.4186047 | 0.4186047 |
| ENSG00000176148 | 0.4760479  | 0.14848485 | 0.4760479  | 0.148484848 | 0.476744186 | 0.4651163 | 0.0755814 |
| ENSG00000185305 |            | 0.11728395 |            | 0.117283951 |             |           | 0.372093  |
| ENSG00000076716 |            | 0.32727273 |            | 0.327272727 |             |           | 0.3882353 |
| ENSG00000156298 |            | 0.42424242 |            | 0.424242424 |             |           | 0.1882353 |
| ENSG00000066136 | 0.4491018  |            | 0.4491018  |             | 0.5         | 0.5       |           |
| ENSG00000171217 | 0.44311377 |            | 0.44311377 |             | 0.279761905 | 0.3430233 |           |
| ENSG00000167100 |            | 0.47256098 |            | 0.472560976 |             |           | 0.4069767 |
| ENSG00000176371 |            | 0.23636364 |            | 0.236363636 |             |           | 0.0872093 |
| ENSG00000004766 |            | 0.32424242 |            | 0.324242424 |             |           | 0.3662791 |
| ENSG00000171608 |            | 0.42121212 |            | 0.421212121 |             |           | 0.5       |
| ENSG00000205426 |            | 0.38333333 |            | 0.383333333 |             |           | 0.1363636 |
| ENSG00000159516 |            | 0.40606061 |            | 0.406060606 |             |           | 0.4235294 |
| ENSG00000187372 |            | 0.2804878  |            | 0.280487805 |             |           | 0.1823529 |
| ENSG00000172890 | 0.22754491 | 0.28181818 | 0.22754491 | 0.281818182 | 0.095238095 | 0.122093  | 0.3837209 |
| ENSG00000144747 |            | 0.47239264 |            | 0.472392638 |             |           | 0.4651163 |
| ENSG00000008323 |            |            |            |             |             |           | 0.0988372 |
| ENSG00000078699 | 0.16766467 | 0.16969697 | 0.16766467 | 0.16969697  |             |           | 0.3647059 |
| ENSG00000197063 | 0.06287425 |            | 0.06287425 |             |             |           |           |
| ENSG00000172927 | 0.22155689 |            | 0.22155689 |             | 0.422619048 | 0.4593023 |           |
| ENSG00000151422 | 0.31437126 | 0.48181818 | 0.31437126 | 0.481818182 |             |           | 0.4886364 |
| ENSG00000122133 |            |            |            |             |             |           | 0.4767442 |
| ENSG00000160216 | 0.28333333 | 0.30487805 | 0.28333333 | 0.304878049 | 0.255555556 | 0.3863636 | 0.3837209 |
| ENSG00000115844 | 0.13636364 |            | 0.13636364 |             | 0.122222222 | 0.1363636 |           |
| ENSG00000198146 |            | 0.15       |            | 0.15        |             |           |           |

|                 |            |            |            |             |             |           |           |
|-----------------|------------|------------|------------|-------------|-------------|-----------|-----------|
| ENSG00000170965 |            | 0.35365854 |            | 0.353658537 |             |           | 0.2882353 |
| ENSG00000125618 |            | 0.46363636 |            | 0.463636364 |             |           | 0.3546512 |
| ENSG00000144535 |            | 0.2        |            | 0.2         |             |           | 0.4235294 |
| ENSG00000139531 | 0.38323353 |            | 0.38323353 |             | 0.428571429 | 0.4360465 |           |
| ENSG00000071575 | 0.20958084 | 0.46363636 | 0.20958084 | 0.463636364 |             |           | 0.1860465 |
| ENSG00000179912 | 0.06111111 |            | 0.06111111 |             | 0.11111111  | 0.0666667 |           |
| ENSG00000064601 | 0.14371257 |            | 0.14371257 |             | 0.482142857 | 0.4534884 |           |
| ENSG00000109805 | 0.35329341 | 0.49444444 | 0.35329341 | 0.49444444  | 0.458333333 | 0.494186  | 0.2674419 |
| ENSG00000029534 |            | 0.17272727 |            | 0.172727273 |             |           | 0.1627907 |
| ENSG00000126217 | 0.47093023 | 0.48181818 | 0.47093023 | 0.481818182 | 0.410714286 | 0.372093  | 0.4244186 |
| ENSG00000114770 |            | 0.4969697  |            | 0.496969697 |             |           | 0.5       |
| ENSG00000168685 |            | 0.42424242 |            | 0.424242424 |             |           | 0.4593023 |
| ENSG00000104321 |            | 0.49444444 |            | 0.494444444 | 0.066666667 |           | 0.3662791 |
| ENSG00000120594 |            |            |            |             | 0.493975904 | 0.4647059 |           |
| ENSG00000196878 |            | 0.27878788 |            | 0.278787879 | 0.220238095 | 0.2383721 | 0.3546512 |
| ENSG00000179930 |            | 0.10555556 |            | 0.105555556 |             |           | 0.2111111 |
| ENSG00000086062 |            | 0.48333333 |            | 0.483333333 |             |           | 0.4767442 |
| ENSG00000143257 |            | 0.41212121 |            | 0.412121212 |             |           | 0.4651163 |
| ENSG00000067369 |            | 0.30487805 |            | 0.304878049 |             |           | 0.3837209 |
| ENSG00000196557 |            |            |            |             |             |           | 0.0581395 |
| ENSG00000198216 |            | 0.35757576 |            | 0.357575758 |             |           | 0.5       |
| ENSG00000182732 |            | 0.19393939 |            | 0.193939394 |             |           | 0.2383721 |
| ENSG00000249087 |            | 0.21818182 |            | 0.218181818 |             |           | 0.2848837 |
| ENSG00000100099 | 0.32934132 | 0.45555556 | 0.32934132 | 0.455555556 | 0.279761905 | 0.2151163 | 0.3295455 |
| ENSG00000185862 |            | 0.31818182 |            | 0.318181818 |             |           | 0.4360465 |
| ENSG00000197323 | 0.40662651 | 0.07303371 | 0.40662651 | 0.073033708 |             |           |           |
| ENSG00000250361 |            | 0.43150685 |            | 0.431506849 |             |           |           |
| ENSG00000171790 |            |            |            |             | 0.261904762 | 0.2142857 |           |
| ENSG00000049167 |            | 0.44242424 |            | 0.442424242 |             |           | 0.125     |
| ENSG00000169509 |            | 0.39393939 |            | 0.393939394 |             |           | 0.2674419 |
| ENSG00000124839 | 0.47590361 | 0.24848485 | 0.47590361 | 0.248484848 | 0.410714286 | 0.4244186 | 0.3662791 |
| ENSG00000232423 |            | 0.065625   |            | 0.065625    |             |           | 0.1130952 |
| ENSG00000124222 |            | 0.46036585 |            | 0.460365854 |             |           | 0.5       |
| ENSG00000143801 | 0.31437126 |            | 0.31437126 |             | 0.291666667 | 0.1309524 |           |
| ENSG00000175854 |            |            |            |             |             |           | 0.1046512 |
| ENSG00000090565 |            | 0.46363636 |            | 0.463636364 |             |           | 0.1627907 |
| ENSG00000115866 | 0.20348837 |            | 0.20348837 |             | 0.422222222 | 0.2272727 |           |
| ENSG00000100593 |            | 0.375      |            | 0.375       |             |           | 0.0697674 |
| ENSG00000138382 |            | 0.09509202 |            | 0.095092025 |             |           |           |
| ENSG00000186469 | 0.35329341 | 0.36111111 | 0.35329341 | 0.361111111 | 0.410714286 | 0.4011628 | 0.4204545 |
| ENSG00000104626 | 0.34730539 | 0.4847561  | 0.34730539 | 0.484756098 | 0.273809524 | 0.2093023 | 0.4333333 |
| ENSG00000177169 | 0.26646707 | 0.25757576 | 0.26646707 | 0.257575758 | 0.321428571 | 0.3546512 |           |
| ENSG00000106052 | 0.20958084 |            | 0.20958084 |             | 0.125       | 0.1153846 |           |
| ENSG00000182612 | 0.44011976 |            | 0.44011976 |             | 0.208333333 | 0.2906977 |           |
| ENSG00000204538 | 0.4625     | 0.37272727 | 0.4625     | 0.372727273 | 0.404761905 | 0.3430233 | 0.4651163 |
| ENSG00000134532 | 0.47904192 |            | 0.47904192 |             | 0.288888889 | 0.2674419 |           |
| ENSG00000257076 |            | 0.3902439  |            | 0.390243902 |             |           | 0.2732558 |
| ENSG00000156052 |            | 0.35       |            | 0.35        |             |           | 0.4244186 |
| ENSG00000172346 |            | 0.14457831 |            | 0.144578313 |             |           |           |
| ENSG00000139083 |            | 0.35       |            | 0.35        |             |           | 0.4444444 |
| ENSG00000204514 | 0.34431138 | 0.36969697 | 0.34431138 | 0.36969697  |             |           | 0.3895349 |
| ENSG00000164007 |            | 0.4382716  |            | 0.438271605 |             |           | 0.4285714 |
| ENSG00000121281 |            | 0.48787879 |            | 0.487878788 |             |           | 0.4277108 |
| ENSG00000104738 | 0.33532934 |            | 0.33532934 |             | 0.156626506 | 0.1369048 |           |

|                 |            |            |            |             |             |           |           |
|-----------------|------------|------------|------------|-------------|-------------|-----------|-----------|
| ENSG0000006451  |            | 0.34883721 |            | 0.348837209 |             |           |           |
| ENSG00000155545 | 0.49101796 | 0.26969697 | 0.49101796 | 0.26969697  | 0.43452381  | 0.4651163 | 0.3470588 |
| ENSG00000111328 |            |            |            |             | 0.05952381  |           |           |
| ENSG00000136682 |            | 0.2247191  |            | 0.224719101 |             |           | 0.4111111 |
| ENSG00000068650 | 0.15568862 | 0.41818182 | 0.15568862 | 0.418181818 | 0.160714286 | 0.0813953 | 0.4651163 |
| ENSG00000111775 |            | 0.35       |            | 0.35        |             |           | 0.3068182 |
| ENSG00000206262 |            |            |            |             |             |           | 0.0813953 |
| ENSG00000165487 |            | 0.16363636 |            | 0.163636364 |             |           | 0.3588235 |
| ENSG00000172602 |            | 0.46625767 |            | 0.466257669 |             |           | 0.4069767 |
| ENSG00000168876 | 0.11077844 | 0.14545455 | 0.11077844 | 0.145454545 |             |           | 0.1046512 |
| ENSG00000187456 |            |            |            |             | 0.214285714 | 0.1918605 |           |
| ENSG00000072310 | 0.12349398 |            | 0.12349398 |             |             |           |           |
| ENSG00000152642 |            | 0.42528736 |            | 0.425287356 |             |           | 0.4069767 |
| ENSG00000179826 | 0.25903614 |            | 0.25903614 |             | 0.101190476 | 0.0882353 |           |
| ENSG00000169446 |            | 0.16459627 |            | 0.164596273 |             | 0.0930233 | 0.0952381 |
| ENSG00000251258 |            | 0.21212121 |            | 0.212121212 |             |           | 0.0529412 |
| ENSG00000182218 |            | 0.05487805 |            | 0.054878049 |             |           |           |
| ENSG00000162398 |            | 0.17878788 |            | 0.178787879 |             |           | 0.3953488 |
| ENSG00000102901 | 0.13772455 |            | 0.13772455 |             | 0.119047619 | 0.127907  |           |
| ENSG00000148700 |            |            |            |             |             |           | 0.0988372 |
| ENSG00000172197 |            | 0.06060606 |            | 0.060606061 |             |           |           |
| ENSG00000156973 |            | 0.22413793 |            | 0.224137931 |             |           | 0.1022727 |
| ENSG00000141200 |            |            |            |             | 0.428571429 | 0.3546512 |           |
| ENSG00000162076 | 0.41317365 | 0.45757576 | 0.41317365 | 0.457575758 | 0.465116279 | 0.4545455 | 0.244186  |
| ENSG00000213281 |            | 0.24085366 |            | 0.240853659 | 0.184210526 | 0.3636364 |           |
| ENSG00000169717 |            |            |            |             |             |           | 0.1686047 |
| ENSG00000100941 |            | 0.23291925 |            | 0.232919255 |             |           | 0.1802326 |
| ENSG00000170458 | 0.31609195 | 0.23636364 | 0.31609195 | 0.236363636 | 0.5         | 0.4875    | 0.1686047 |
| ENSG00000184005 |            | 0.48255814 |            | 0.48255814  |             |           | 0.244186  |
| ENSG00000131115 | 0.43712575 |            | 0.43712575 |             | 0.083333333 | 0.1511628 | 0.1352941 |
| ENSG00000198106 | 0.25       |            | 0.25       |             | 0.431818182 | 0.3953488 |           |
| ENSG00000148110 |            | 0.28333333 |            | 0.283333333 |             |           |           |
| ENSG00000241258 | 0.28181818 | 0.37878788 | 0.28181818 | 0.378787879 | 0.333333333 | 0.3895349 | 0.494186  |
| ENSG00000100461 | 0.36526946 | 0.2030303  | 0.36526946 | 0.203030303 | 0.261904762 | 0.1647059 | 0.1918605 |
| ENSG00000004799 | 0.38323353 | 0.46666667 | 0.38323353 | 0.466666667 | 0.238095238 | 0.2093023 | 0.2272727 |
| ENSG00000206260 |            | 0.11111111 |            | 0.111111111 |             |           | 0.1363636 |
| ENSG00000164241 |            |            |            |             |             |           | 0.1104651 |
| ENSG00000110848 | 0.15       | 0.34242424 | 0.15       | 0.342424242 |             |           | 0.3977273 |
| ENSG00000183576 |            | 0.4030303  |            | 0.403030303 |             |           | 0.4476744 |
| ENSG00000163618 |            | 0.37575758 |            | 0.375757576 |             |           | 0.3430233 |
| ENSG00000169885 |            |            |            |             | 0.482142857 | 0.4767442 |           |
| ENSG00000254290 |            | 0.49090909 |            | 0.490909091 | 0.113095238 | 0.0930233 | 0.4545455 |
| ENSG00000135912 | 0.09281437 | 0.44817073 | 0.09281437 | 0.448170732 | 0.160714286 | 0.1627907 | 0.1627907 |
| ENSG00000157540 | 0.32831325 | 0.38181818 | 0.32831325 | 0.381818182 | 0.369047619 | 0.3882353 | 0.3953488 |
| ENSG00000185739 |            | 0.48787879 |            | 0.487878788 |             |           | 0.4651163 |
| ENSG00000125257 |            | 0.46969697 |            | 0.46969697  |             |           | 0.4705882 |
| ENSG00000114209 | 0.45508982 |            | 0.45508982 |             | 0.303571429 | 0.3197674 |           |
| ENSG00000112214 |            | 0.17272727 |            | 0.172727273 |             |           | 0.2790698 |
| ENSG00000155329 |            | 0.22121212 |            | 0.221212121 |             |           | 0.25      |
| ENSG00000141720 |            | 0.4969697  |            | 0.496969697 |             |           | 0.4534884 |
| ENSG00000156990 |            | 0.12048193 |            | 0.120481928 |             |           | 0.4360465 |
| ENSG00000180066 |            | 0.06969697 |            | 0.06969697  |             |           | 0.0697674 |
| ENSG00000170153 |            | 0.42121212 |            | 0.421212121 |             |           | 0.4127907 |
| ENSG00000137504 |            | 0.17272727 |            | 0.172727273 |             |           | 0.4360465 |

|                 |            |            |            |             |             |           |           |
|-----------------|------------|------------|------------|-------------|-------------|-----------|-----------|
| ENSG00000156482 | 0.46407186 |            | 0.46407186 |             | 0.071428571 |           |           |
| ENSG00000116661 |            | 0.20909091 |            | 0.209090909 |             |           | 0.2732558 |
| ENSG0000010256  |            |            |            |             |             |           | 0.0581395 |
| ENSG00000167034 | 0.34883721 | 0.4137931  | 0.34883721 | 0.413793103 | 0.344444444 | 0.3214286 | 0.372093  |
| ENSG00000206026 |            | 0.25842697 |            | 0.258426966 |             |           | 0.3372093 |
| ENSG00000065320 |            |            |            |             |             |           | 0.4825581 |
| ENSG00000171501 | 0.38484848 |            | 0.38484848 |             | 0.475903614 | 0.4638554 |           |
| ENSG00000165863 |            | 0.05454545 |            | 0.054545455 |             |           | 0.3837209 |
| ENSG00000101844 |            |            |            |             |             |           | 0.0523256 |
| ENSG00000166482 |            | 0.17878788 |            | 0.178787879 |             |           |           |
| ENSG00000133816 | 0.34242424 |            | 0.34242424 |             | 0.402439024 | 0.3647059 |           |
| ENSG00000059758 |            | 0.18787879 |            | 0.187878788 |             |           | 0.2       |
| ENSG00000091317 |            | 0.35060976 |            | 0.350609756 |             |           | 0.4186047 |
| ENSG00000077232 |            | 0.34876543 |            | 0.348765432 |             |           | 0.4883721 |
| ENSG00000148339 | 0.33532934 | 0.16363636 | 0.33532934 | 0.163636364 |             |           | 0.244186  |
| ENSG00000025156 | 0.48427673 |            | 0.48427673 |             | 0.409638554 | 0.4390244 |           |
| ENSG00000112081 |            | 0.18902439 |            | 0.18902439  |             |           | 0.4767442 |
| ENSG00000107521 |            | 0.4969697  |            | 0.496969697 |             |           | 0.4883721 |
| ENSG00000163012 | 0.3742515  |            | 0.3742515  |             |             |           |           |
| ENSG00000109270 | 0.40419162 | 0.26363636 | 0.40419162 | 0.263636364 | 0.392857143 | 0.494186  | 0.2034884 |
| ENSG00000136379 |            | 0.12727273 |            | 0.127272727 |             |           | 0.3470588 |
| ENSG00000166268 | 0.32335329 | 0.36363636 | 0.32335329 | 0.363636364 | 0.142857143 | 0.2151163 | 0.4647059 |
| ENSG00000164185 |            | 0.25757576 |            | 0.257575758 |             |           | 0.3953488 |
| ENSG00000095752 |            | 0.27586207 |            | 0.275862069 |             |           | 0.0581395 |
| ENSG00000115827 | 0.41017964 | 0.22256098 | 0.41017964 | 0.222560976 | 0.261904762 | 0.3604651 | 0.3546512 |
| ENSG00000188379 |            | 0.25304878 |            | 0.25304878  |             |           |           |
| ENSG00000103061 |            | 0.41818182 |            | 0.418181818 |             |           | 0.1802326 |
| ENSG00000113088 |            | 0.22727273 |            | 0.227272727 |             |           |           |
| ENSG00000172057 | 0.43333333 |            | 0.43333333 |             | 0.409090909 | 0.2840909 |           |
| ENSG00000101104 | 0.44444444 | 0.39090909 | 0.44444444 | 0.390909091 | 0.388888889 | 0.4111111 | 0.3953488 |
| ENSG00000102468 | 0.25149701 | 0.13496933 | 0.25149701 | 0.134969325 |             |           | 0.2151163 |
| ENSG00000180875 |            | 0.44512195 |            | 0.445121951 |             |           | 0.3953488 |
| ENSG00000084072 |            | 0.43865031 |            | 0.438650307 |             |           | 0.3941176 |
| ENSG00000182749 |            | 0.49378882 |            | 0.49378882  |             |           | 0.3841463 |
| ENSG00000157343 |            | 0.24848485 |            | 0.248484848 |             |           | 0.3546512 |
| ENSG00000136153 | 0.41317365 |            | 0.41317365 |             | 0.255555556 | 0.1777778 |           |
| ENSG00000112852 |            | 0.06363636 |            | 0.063636364 |             |           | 0.1162791 |
| ENSG00000085231 | 0.45783133 |            | 0.45783133 |             | 0.103658537 | 0.1506024 |           |
| ENSG00000188372 | 0.15568862 |            | 0.15568862 |             | 0.410714286 | 0.494186  |           |
| ENSG00000186212 |            | 0.20245399 |            | 0.202453988 |             |           | 0.2209302 |
| ENSG00000203985 |            | 0.39090909 |            | 0.390909091 |             |           | 0.4011628 |
| ENSG00000160214 |            | 0.41818182 |            | 0.418181818 |             |           | 0.4825581 |
| ENSG00000165271 | 0.43712575 | 0.12424242 | 0.43712575 | 0.124242424 | 0.5         | 0.4418605 | 0.2151163 |
| ENSG00000113889 | 0.46107784 | 0.41463415 | 0.46107784 | 0.414634146 | 0.321428571 | 0.2764706 | 0.3488372 |
| ENSG00000151576 |            | 0.44848485 |            | 0.448484848 |             |           | 0.4534884 |
| ENSG00000205047 | 0.23888889 | 0.09815951 | 0.23888889 | 0.098159509 | 0.101190476 |           | 0.1686047 |
| ENSG00000160339 |            | 0.28787879 |            | 0.287878788 |             |           | 0.3444444 |
| ENSG00000177303 | 0.47647059 |            | 0.47647059 |             | 0.4         | 0.4883721 |           |
| ENSG00000134744 |            | 0.13636364 |            | 0.136363636 |             |           | 0.1395349 |
| ENSG00000110237 |            | 0.07228916 |            | 0.072289157 |             |           |           |
| ENSG00000214194 | 0.48888889 | 0.24390244 | 0.48888889 | 0.243902439 | 0.102272727 | 0.0581395 | 0.0529412 |
| ENSG00000233276 | 0.20555556 |            | 0.20555556 |             | 0.077777778 | 0.1022727 |           |
| ENSG00000175711 |            | 0.18390805 |            | 0.183908046 |             |           | 0.2045455 |
| ENSG00000099869 | 0.38787879 | 0.47256098 | 0.38787879 | 0.472560976 | 0.108433735 |           | 0.4883721 |

|                |            |            |            |             |             |           |           |
|----------------|------------|------------|------------|-------------|-------------|-----------|-----------|
| ENSG0000088986 | 0.17964072 | 0.30606061 | 0.17964072 | 0.306060606 | 0.053571429 |           | 0.4418605 |
| ENSG0000138172 |            | 0.37272727 |            | 0.372727273 |             |           | 0.3953488 |
| ENSG0000253276 |            | 0.4        |            | 0.4         |             |           | 0.3941176 |
| ENSG0000127870 | 0.43113772 |            | 0.43113772 |             | 0.416666667 | 0.4534884 |           |
| ENSG0000116497 | 0.26347305 | 0.30606061 | 0.26347305 | 0.306060606 |             |           | 0.2045455 |
| ENSG0000205323 |            | 0.32222222 |            | 0.322222222 |             |           | 0.3181818 |
| ENSG0000220205 |            | 0.2969697  |            | 0.296969697 |             |           | 0.4534884 |
| ENSG0000131473 |            | 0.13333333 |            | 0.133333333 |             |           | 0.0813953 |
| ENSG0000187860 | 0.48888889 |            | 0.48888889 |             | 0.188888889 | 0.2159091 |           |
| ENSG0000114812 |            | 0.47878788 |            | 0.478787879 |             |           | 0.3662791 |
| ENSG0000177294 |            | 0.27743902 |            | 0.277439024 |             |           | 0.2732558 |
| ENSG0000197894 |            | 0.36931818 |            | 0.369318182 |             |           |           |
| ENSG0000079974 |            | 0.11515152 |            | 0.115151515 |             |           | 0.3604651 |
| ENSG0000152291 | 0.4760479  | 0.49438202 | 0.4760479  | 0.494382022 | 0.090361446 | 0.1918605 | 0.5       |
| ENSG0000115145 |            | 0.28888889 |            | 0.288888889 |             |           | 0.3488372 |
| ENSG0000146540 | 0.10465116 | 0.1882716  | 0.10465116 | 0.188271605 | 0.341463415 | 0.4883721 | 0.2267442 |
| ENSG0000120053 |            |            |            |             |             |           | 0.0697674 |
| ENSG0000055917 | 0.17664671 | 0.3117284  | 0.17664671 | 0.311728395 |             |           | 0.2738095 |
| ENSG0000166912 |            | 0.46969697 |            | 0.46969697  |             |           | 0.1395349 |
| ENSG0000141994 | 0.21556886 |            | 0.21556886 |             | 0.464285714 | 0.3941176 |           |
| ENSG0000188130 | 0.35555556 |            | 0.35555556 |             | 0.5         | 0.3409091 |           |
| ENSG0000197782 |            | 0.11494253 |            | 0.114942529 |             |           | 0.1931818 |
| ENSG0000031081 | 0.19760479 | 0.25294118 | 0.19760479 | 0.252941176 | 0.279761905 | 0.2848837 | 0.1744186 |
| ENSG0000136560 |            | 0.46363636 |            | 0.463636364 |             |           | 0.4823529 |
| ENSG0000164134 |            | 0.13939394 |            | 0.139393939 | 0.083333333 |           | 0.255814  |
| ENSG0000188177 |            | 0.41158537 |            | 0.411585366 |             |           | 0.2267442 |
| ENSG0000174231 | 0.3742515  | 0.05454545 | 0.3742515  | 0.054545455 | 0.1         | 0.0568182 |           |
| ENSG0000177646 | 0.29341317 | 0.29393939 | 0.29341317 | 0.293939394 | 0.44047619  | 0.4767442 | 0.4767442 |
| ENSG0000253719 |            | 0.45121951 |            | 0.451219512 |             |           | 0.4411765 |
| ENSG0000183479 | 0.46111111 |            | 0.46111111 |             |             |           |           |
| ENSG0000175548 | 0.18711656 | 0.35616438 | 0.18711656 | 0.356164384 | 0.136904762 | 0.1162791 | 0.1       |
| ENSG0000150045 |            | 0.09090909 |            | 0.090909091 |             |           |           |
| ENSG0000204335 |            | 0.31111111 |            | 0.311111111 |             |           | 0.3977273 |
| ENSG0000147862 | 0.49401198 | 0.30674847 | 0.49401198 | 0.306748466 | 0.44047619  | 0.4767442 | 0.4879518 |
| ENSG0000177606 | 0.18862275 |            | 0.18862275 |             |             |           |           |
| ENSG0000033170 |            | 0.41212121 |            | 0.412121212 | 0.265060241 | 0.1337209 | 0.4476744 |
| ENSG0000014641 | 0.11377246 |            | 0.11377246 |             | 0.166666667 | 0.2045455 |           |
| ENSG0000198590 | 0.16666667 |            | 0.16666667 |             |             | 0.2222222 |           |
| ENSG0000132434 |            | 0.39440994 |            | 0.394409938 | 0.409638554 | 0.4767442 | 0.4941176 |
| ENSG0000108960 |            | 0.45757576 |            | 0.457575758 |             |           | 0.3352941 |
| ENSG0000136731 | 0.26047904 | 0.39444444 | 0.26047904 | 0.394444444 | 0.202380952 | 0.1627907 | 0.5       |
| ENSG0000184828 | 0.12222222 |            | 0.12222222 |             | 0.188888889 | 0.2       |           |
| ENSG0000147180 |            | 0.11212121 |            | 0.112121212 |             |           | 0.1904762 |
| ENSG0000105549 | 0.38023952 |            | 0.38023952 |             | 0.13253012  | 0.2790698 |           |
| ENSG0000171109 |            | 0.2347561  |            | 0.234756098 |             |           | 0.4418605 |
| ENSG0000120436 | 0.17777778 |            | 0.17777778 |             | 0.388888889 | 0.3555556 |           |
| ENSG0000117501 |            | 0.12777778 |            | 0.127777778 |             |           |           |
| ENSG0000165480 |            | 0.31212121 |            | 0.312121212 |             |           | 0.2228916 |
| ENSG0000165943 |            | 0.35060976 |            | 0.350609756 |             |           | 0.2267442 |
| ENSG0000175606 | 0.146875   | 0.5        | 0.146875   | 0.5         | 0.204819277 | 0.0941176 | 0.25      |
| ENSG0000188277 |            | 0.47151899 |            | 0.471518987 |             |           | 0.4       |
| ENSG0000162236 |            |            |            |             |             |           | 0.1511628 |
| ENSG0000157954 |            | 0.35151515 |            | 0.351515152 |             |           | 0.4651163 |
| ENSG0000114796 |            | 0.24534161 |            | 0.245341615 |             |           | 0.4       |



|                 |            |            |            |             |             |           |           |
|-----------------|------------|------------|------------|-------------|-------------|-----------|-----------|
| ENSG00000198496 | 0.20555556 |            | 0.20555556 |             | 0.31111111  |           | 0.2840909 |
| ENSG00000118004 | 0.41111111 |            | 0.41111111 |             | 0.1         |           | 0.1477273 |
| ENSG00000066654 |            | 0.38787879 |            | 0.38787878  |             |           | 0.2848837 |
| ENSG00000113597 | 0.41916168 |            | 0.41916168 |             | 0.396341463 |           | 0.3571429 |
| ENSG00000127472 |            |            |            |             | 0.273809524 |           | 0.2790698 |
| ENSG00000254858 |            | 0.33888889 |            | 0.33888889  |             |           | 0.0909091 |
| ENSG00000117461 | 0.3969697  | 0.36666667 | 0.3969697  | 0.36666667  | 0.355421687 | 0.2848837 | 0.2333333 |
| ENSG00000137757 | 0.18562874 | 0.47777778 | 0.18562874 | 0.47777778  |             |           | 0.2045455 |
| ENSG00000136689 | 0.20658683 | 0.32098765 | 0.20658683 | 0.320987654 | 0.273809524 | 0.2209302 | 0.3444444 |
| ENSG00000149806 |            |            |            |             |             | 0.0581395 |           |
| ENSG00000073756 |            | 0.37116564 |            | 0.371165644 |             |           | 0.2383721 |
| ENSG00000154511 |            | 0.1        |            | 0.1         |             |           |           |
| ENSG00000152229 |            | 0.1        |            | 0.1         |             |           | 0.4204545 |
| ENSG00000108509 |            | 0.06111111 |            | 0.06111111  |             |           | 0.0909091 |
| ENSG00000179837 |            | 0.17878788 |            | 0.178787879 |             |           | 0.2117647 |
| ENSG00000081800 |            | 0.29268293 |            | 0.292682927 |             |           | 0.3764706 |
| ENSG00000165970 |            | 0.47575758 |            | 0.475757576 |             |           | 0.4593023 |
| ENSG00000176463 | 0.12275449 | 0.39772727 | 0.12275449 | 0.397727273 | 0.228395062 | 0.125     | 0.3295455 |
| ENSG00000165801 |            | 0.14942529 |            | 0.149425287 |             |           | 0.4880952 |
| ENSG00000185479 | 0.17065868 |            | 0.17065868 |             | 0.18452381  | 0.122093  |           |
| ENSG00000204316 |            | 0.2652439  |            | 0.265243902 |             |           | 0.2325581 |
| ENSG00000143224 | 0.19760479 |            | 0.19760479 |             | 0.428571429 | 0.4767442 |           |
| ENSG00000205502 | 0.0748503  |            | 0.0748503  |             | 0.244047619 | 0.2209302 |           |
| ENSG00000175874 |            | 0.2969697  |            | 0.296969697 |             |           | 0.1588235 |
| ENSG00000135945 |            | 0.47878788 |            | 0.478787879 |             |           | 0.3176471 |
| ENSG00000029364 |            | 0.19090909 |            | 0.190909091 |             |           |           |
| ENSG00000018280 | 0.18562874 | 0.36666667 | 0.18562874 | 0.366666667 | 0.136904762 | 0.1117647 | 0.2674419 |
| ENSG00000198862 |            | 0.10060976 |            | 0.100609756 |             |           | 0.1046512 |
| ENSG00000005075 |            | 0.16969697 |            | 0.16969697  |             |           | 0.4593023 |
| ENSG00000124299 |            | 0.27272727 |            | 0.272727273 |             |           | 0.1162791 |
| ENSG00000158483 |            | 0.35393258 |            | 0.353932584 |             |           | 0.3409091 |
| ENSG00000104219 |            | 0.2030303  |            | 0.203030303 |             |           | 0.2823529 |
| ENSG00000143889 |            | 0.22424242 |            | 0.224242424 |             |           | 0.3023256 |
| ENSG00000132600 | 0.38922156 |            | 0.38922156 |             | 0.226190476 | 0.1918605 |           |
| ENSG00000164930 | 0.24444444 | 0.48787879 | 0.24444444 | 0.487878788 | 0.422222222 | 0.3977273 | 0.3895349 |
| ENSG00000258839 | 0.37078652 | 0.13939394 | 0.37078652 | 0.139393939 | 0.366666667 | 0.2325581 | 0.127907  |
| ENSG00000070193 |            | 0.36363636 |            | 0.363636364 |             |           | 0.4883721 |
| ENSG00000009413 | 0.37222222 | 0.44242424 | 0.37222222 | 0.442424242 | 0.488888889 | 0.4318182 | 0.4318182 |
| ENSG00000162817 | 0.2994012  | 0.22727273 | 0.2994012  | 0.227272727 | 0.476190476 | 0.4476744 | 0.2093023 |
| ENSG00000106305 | 0.3253012  | 0.14848485 | 0.3253012  | 0.148484848 | 0.136904762 | 0.1453488 | 0.0988372 |
| ENSG00000115421 |            | 0.24242424 |            | 0.242424242 |             |           | 0.1931818 |
| ENSG00000163888 |            | 0.22121212 |            | 0.221212121 |             |           | 0.4825581 |
| ENSG00000137770 | 0.23053892 | 0.40229885 | 0.23053892 | 0.402298851 | 0.196428571 | 0.127907  | 0.0988372 |
| ENSG00000183723 |            | 0.06707317 |            | 0.067073171 |             |           | 0.2383721 |
| ENSG00000149187 |            | 0.1402439  |            | 0.140243902 |             |           | 0.3546512 |
| ENSG00000172466 | 0.45505618 | 0.43258427 | 0.45505618 | 0.43258427  | 0.422619048 | 0.4360465 | 0.25      |
| ENSG00000109472 | 0.22155689 |            | 0.22155689 |             | 0.303571429 | 0.255814  |           |
| ENSG00000185379 |            |            |            |             |             |           | 0.1104651 |
| ENSG00000145569 |            | 0.10909091 |            | 0.109090909 |             |           | 0.2159091 |
| ENSG00000253598 | 0.47222222 |            | 0.47222222 |             | 0.066666667 | 0.1704545 |           |
| ENSG00000130813 |            | 0.11818182 |            | 0.118181818 |             |           |           |
| ENSG00000184350 |            | 0.34242424 |            | 0.342424242 |             |           |           |
| ENSG00000135702 | 0.10778443 |            | 0.10778443 |             | 0.136904762 | 0.2294118 |           |
| ENSG00000057252 | 0.09580838 | 0.40909091 | 0.09580838 | 0.409090909 | 0.488095238 | 0.494186  | 0.4825581 |

|                 |            |            |            |             |             |           |           |
|-----------------|------------|------------|------------|-------------|-------------|-----------|-----------|
| ENSG00000124615 | 0.23295455 | 0.11042945 | 0.23295455 | 0.110429448 | 0.177777778 | 0.1860465 | 0.2034884 |
| ENSG00000222033 |            | 0.35757576 |            | 0.357575758 |             |           |           |
| ENSG0000047648  |            | 0.20245399 |            | 0.202453988 |             |           |           |
| ENSG00000249967 |            | 0.1969697  |            | 0.196969697 |             |           | 0.0988372 |
| ENSG00000087494 |            | 0.06363636 |            | 0.063636364 |             |           | 0.1337209 |
| ENSG00000130517 |            | 0.4375     |            | 0.4375      |             |           | 0.4767442 |
| ENSG00000168421 | 0.31024096 | 0.38888889 | 0.31024096 | 0.388888889 | 0.409090909 | 0.4285714 | 0.25      |
| ENSG00000139726 |            | 0.08895706 |            | 0.088957055 |             |           |           |
| ENSG00000005100 |            | 0.13793103 |            | 0.137931034 |             |           | 0.2727273 |
| ENSG00000089820 |            | 0.46060606 |            | 0.460606061 |             |           | 0.255814  |
| ENSG00000167653 | 0.23636364 | 0.45757576 | 0.23636364 | 0.457575758 | 0.261904762 | 0.377907  | 0.3823529 |
| ENSG00000054148 | 0.17365269 |            | 0.17365269 |             | 0.148809524 | 0.0755814 |           |
| ENSG00000147246 | 0.37222222 | 0.12777778 | 0.37222222 | 0.127777778 | 0.177777778 | 0.1477273 | 0.0795455 |
| ENSG00000206474 | 0.17365269 |            | 0.17365269 |             |             | 0.1046512 |           |
| ENSG00000112685 |            | 0.27272727 |            | 0.272727273 |             |           | 0.2906977 |
| ENSG00000166130 |            | 0.49090909 |            | 0.490909091 | 0.297619048 | 0.1666667 | 0.4593023 |
| ENSG00000168269 |            | 0.25151515 |            | 0.251515152 |             |           | 0.4127907 |
| ENSG00000059378 |            | 0.3597561  |            | 0.359756098 |             |           | 0.4883721 |
| ENSG00000121316 | 0.4246988  | 0.32317073 | 0.4246988  | 0.323170732 | 0.476190476 | 0.4360465 | 0.1705882 |
| ENSG00000124493 | 0.36826347 | 0.17222222 | 0.36826347 | 0.172222222 | 0.427710843 | 0.372093  | 0.2727273 |
| ENSG00000152214 | 0.1011236  |            | 0.1011236  |             | 0.089285714 | 0.0930233 |           |
| ENSG00000213625 |            | 0.41573034 |            | 0.415730337 |             |           | 0.1888889 |
| ENSG00000072818 | 0.31111111 |            | 0.31111111 |             | 0.307228916 | 0.1704545 |           |
| ENSG00000128487 |            | 0.42696629 |            | 0.426966292 |             |           | 0.1309524 |
| ENSG00000161179 |            | 0.18181818 |            | 0.181818182 |             |           | 0.372093  |
| ENSG00000165078 | 0.38253012 | 0.20731707 | 0.38253012 | 0.207317073 | 0.083333333 | 0.1744186 |           |
| ENSG00000117114 | 0.30239521 | 0.06179775 | 0.30239521 | 0.061797753 | 0.060240964 | 0.0755814 | 0.0813953 |
| ENSG00000212993 | 0.20359281 | 0.29393939 | 0.20359281 | 0.293939394 | 0.363095238 | 0.2732558 | 0.2151163 |
| ENSG00000232098 | 0.14371257 |            | 0.14371257 |             | 0.321428571 | 0.244186  |           |
| ENSG00000155093 |            | 0.09659091 |            | 0.096590909 |             |           | 0.2111111 |
| ENSG00000141219 |            | 0.23030303 |            | 0.23030303  |             |           | 0.1860465 |
| ENSG00000177938 | 0.43072289 |            | 0.43072289 |             | 0.301204819 | 0.3255814 |           |
| ENSG00000083642 |            | 0.46363636 |            | 0.463636364 |             |           | 0.1941176 |
| ENSG00000186474 | 0.37356322 |            | 0.37356322 |             | 0.44047619  | 0.5       |           |
| ENSG00000167674 |            | 0.42727273 |            | 0.427272727 |             |           | 0.2823529 |
| ENSG00000170379 |            | 0.45757576 |            | 0.457575758 |             |           | 0.4642857 |
| ENSG00000160584 |            | 0.15       |            | 0.15        |             |           | 0.1477273 |
| ENSG00000122034 |            | 0.24545455 |            | 0.245454545 |             |           |           |
| ENSG00000137200 | 0.29640719 | 0.05757576 | 0.29640719 | 0.057575758 |             |           |           |
| ENSG00000100427 |            | 0.29310345 |            | 0.293103448 |             | 0.0639535 | 0.3636364 |
| ENSG00000051620 |            |            |            |             |             |           | 0.1337209 |
| ENSG00000071889 |            | 0.20689655 |            | 0.206896552 |             |           | 0.2325581 |
| ENSG00000137710 |            | 0.47575758 |            | 0.475757576 |             |           | 0.4659091 |
| ENSG00000161692 | 0.05       | 0.2030303  | 0.05       | 0.203030303 |             |           | 0.1918605 |
| ENSG00000109771 | 0.46060606 |            | 0.46060606 |             | 0.345238095 | 0.3662791 |           |
| ENSG00000162409 |            | 0.47878788 |            | 0.478787879 |             |           | 0.4593023 |
| ENSG00000205413 |            |            |            |             |             |           | 0.1162791 |
| ENSG00000164252 |            | 0.19886364 |            | 0.198863636 |             |           | 0.0581395 |
| ENSG00000174738 |            | 0.09393939 |            | 0.093939394 |             |           |           |
| ENSG00000132704 | 0.07185629 | 0.20606061 | 0.07185629 | 0.206060606 | 0.386904762 | 0.4883721 | 0.3255814 |
| ENSG00000143977 | 0.22754491 |            | 0.22754491 |             | 0.136904762 | 0.2222222 |           |
| ENSG00000162972 | 0.13173653 |            | 0.13173653 |             | 0.238095238 | 0.1918605 |           |
| ENSG00000104611 |            | 0.45151515 |            | 0.451515152 |             |           | 0.1555556 |
| ENSG00000179242 | 0.24444444 | 0.18390805 | 0.24444444 | 0.183908046 | 0.133333333 | 0.1860465 | 0.3977273 |

|                 |            |            |            |             |             |           |           |
|-----------------|------------|------------|------------|-------------|-------------|-----------|-----------|
| ENSG00000188517 | 0.08383234 | 0.42987805 | 0.08383234 | 0.429878049 | 0.422619048 | 0.4360465 | 0.4302326 |
| ENSG00000136297 |            | 0.44848485 |            | 0.448484848 |             |           | 0.2790698 |
| ENSG00000154153 | 0.43413174 | 0.31707317 | 0.43413174 | 0.317073171 | 0.488095238 | 0.377907  | 0.4411765 |
| ENSG00000178038 |            | 0.48863636 |            | 0.488636364 |             |           | 0.4534884 |
| ENSG00000137869 | 0.15568862 | 0.46666667 | 0.15568862 | 0.466666667 | 0.482142857 | 0.3662791 | 0.4647059 |
| ENSG00000117597 |            | 0.14329268 |            | 0.143292683 |             |           | 0.1046512 |
| ENSG00000139971 |            | 0.42727273 |            | 0.427272727 |             |           | 0.4864865 |
| ENSG00000181788 |            | 0.12804878 |            | 0.12804878  |             |           |           |
| ENSG00000157224 | 0.43413174 | 0.31515152 | 0.43413174 | 0.315151515 | 0.255952381 | 0.1860465 | 0.4011628 |
| ENSG00000121351 |            | 0.23333333 |            | 0.233333333 |             |           | 0.0697674 |
| ENSG00000111863 | 0.4246988  | 0.23333333 | 0.4246988  | 0.233333333 | 0.488888889 | 0.4883721 | 0.3555556 |
| ENSG00000163913 | 0.14371257 |            | 0.14371257 |             |             |           |           |
| ENSG00000134086 | 0.11212121 | 0.36969697 | 0.11212121 | 0.36969697  | 0.232142857 | 0.2674419 | 0.2616279 |
| ENSG00000205678 |            | 0.19318182 |            | 0.193181818 |             |           | 0.2954545 |
| ENSG00000141314 |            |            |            |             |             |           | 0.1022727 |
| ENSG00000136699 | 0.46107784 | 0.34756098 | 0.46107784 | 0.347560976 | 0.488095238 | 0.3863636 | 0.3705882 |
| ENSG00000147642 | 0.43413174 | 0.08841463 | 0.43413174 | 0.088414634 | 0.476190476 | 0.4360465 |           |
| ENSG00000253710 |            | 0.45454545 |            | 0.454545455 |             |           | 0.4821429 |
| ENSG00000099800 | 0.45808383 |            | 0.45808383 |             | 0.398809524 | 0.4883721 |           |
| ENSG00000152348 |            | 0.48170732 |            | 0.481707317 |             |           | 0.0581395 |
| ENSG00000137440 | 0.19444444 | 0.31111111 | 0.19444444 | 0.311111111 | 0.333333333 | 0.3222222 | 0.0777778 |
| ENSG00000105849 | 0.11077844 | 0.14110429 | 0.11077844 | 0.141104294 | 0.380952381 | 0.4651163 | 0.4709302 |
| ENSG00000111885 |            | 0.4969697  |            | 0.496969697 |             |           | 0.4476744 |
| ENSG00000187699 | 0.35329341 | 0.3        | 0.35329341 | 0.3         | 0.130952381 | 0.1395349 | 0.4772727 |
| ENSG00000141580 |            | 0.40251572 |            | 0.402515723 |             |           | 0.3493976 |
| ENSG00000206013 |            |            |            |             |             |           | 0.3081395 |
| ENSG00000005108 |            | 0.36196319 |            | 0.36196319  |             |           | 0.1918605 |
| ENSG00000132142 |            |            |            |             | 0.44047619  | 0.2616279 |           |
| ENSG00000162490 |            | 0.46511628 |            | 0.465116279 |             |           | 0.452381  |
| ENSG00000112406 |            | 0.3969697  |            | 0.396969697 |             |           | 0.4090909 |
| ENSG00000164323 |            | 0.5        |            | 0.5         |             |           | 0.3197674 |
| ENSG00000186868 |            | 0.42121212 |            | 0.421212121 |             |           | 0.1046512 |
| ENSG00000102743 |            | 0.4245283  |            | 0.424528302 |             |           | 0.4222222 |
| ENSG00000087237 |            | 0.20606061 |            | 0.206060606 |             |           | 0.1104651 |
| ENSG00000138642 |            | 0.06363636 |            | 0.063636364 |             |           |           |
| ENSG00000211772 |            | 0.43636364 |            | 0.436363636 |             |           | 0.122093  |
| ENSG00000139343 | 0.12650602 | 0.47752809 | 0.12650602 | 0.47752809  | 0.136904762 | 0.0813953 | 0.4333333 |
| ENSG00000176410 |            | 0.48787879 |            | 0.487878788 |             |           | 0.2764706 |
| ENSG00000171045 |            | 0.10060976 |            | 0.100609756 |             |           | 0.122093  |
| ENSG00000152192 |            | 0.40449438 |            | 0.404494382 |             |           | 0.2727273 |
| ENSG00000187498 |            | 0.08181818 |            | 0.081818182 |             |           |           |
| ENSG00000168803 | 0.21212121 | 0.31515152 | 0.21212121 | 0.315151515 | 0.5         | 0.4883721 | 0.4883721 |
| ENSG00000135597 |            | 0.48275862 |            | 0.482758621 |             |           | 0.4318182 |
| ENSG00000102780 |            | 0.2        |            | 0.2         |             |           |           |
| ENSG00000103375 |            | 0.40229885 |            | 0.402298851 |             |           | 0.4318182 |
| ENSG00000067533 |            | 0.05974843 |            | 0.059748428 |             |           | 0.0888889 |
| ENSG00000254505 | 0.2005988  | 0.49090909 | 0.2005988  | 0.490909091 | 0.172619048 | 0.1976744 | 0.1976744 |
| ENSG00000183580 |            | 0.31818182 |            | 0.318181818 |             |           | 0.1395349 |
| ENSG00000117481 | 0.08083832 |            | 0.08083832 |             |             |           |           |
| ENSG00000083828 |            | 0.39090909 |            | 0.390909091 |             |           | 0.4390244 |
| ENSG00000212928 | 0.10778443 | 0.14634146 | 0.10778443 | 0.146341463 | 0.119047619 | 0.0755814 | 0.0755814 |
| ENSG00000180357 |            | 0.1091954  |            | 0.109195402 |             |           |           |
| ENSG00000153132 | 0.25       | 0.0969697  | 0.25       | 0.096969697 | 0.202380952 | 0.1162791 | 0.1744186 |
| ENSG00000165105 |            | 0.48787879 |            | 0.487878788 |             |           | 0.25      |

|                 |            |            |            |             |             |           |           |
|-----------------|------------|------------|------------|-------------|-------------|-----------|-----------|
| ENSG00000120526 | 0.05988024 | 0.41104294 | 0.05988024 | 0.411042945 |             |           | 0.494186  |
| ENSG00000122778 |            | 0.30606061 |            | 0.306060606 |             |           | 0.4593023 |
| ENSG00000163807 | 0.14371257 |            | 0.14371257 |             |             |           |           |
| ENSG00000010932 | 0.20658683 | 0.35757576 | 0.20658683 | 0.357575758 | 0.30952381  | 0.244186  | 0.2965116 |
| ENSG00000092607 |            |            |            |             | 0.095238095 |           |           |
| ENSG00000187783 |            | 0.26969697 |            | 0.26969697  |             |           | 0.4534884 |
| ENSG00000065060 |            | 0.09393939 |            | 0.093939394 |             |           | 0.2674419 |
| ENSG00000187735 |            | 0.1030303  |            | 0.103030303 |             |           |           |
| ENSG00000166261 |            | 0.37804878 |            | 0.37804878  |             |           | 0.2325581 |
| ENSG00000205060 |            | 0.46363636 |            | 0.463636364 |             |           | 0.3081395 |
| ENSG00000111678 | 0.5        |            | 0.5        |             | 0.232142857 | 0.2906977 |           |
| ENSG00000166479 |            | 0.07222222 |            | 0.072222222 |             |           | 0.1823529 |
| ENSG00000119431 | 0.26807229 |            | 0.26807229 |             | 0.321428571 | 0.3488372 |           |
| ENSG00000170275 |            | 0.42941176 |            | 0.429411765 |             |           | 0.0681818 |
| ENSG00000115446 | 0.13473054 |            | 0.13473054 |             | 0.267857143 | 0.2965116 |           |
| ENSG00000149742 | 0.22754491 |            | 0.22754491 |             | 0.446428571 | 0.3953488 |           |
| ENSG00000170525 |            | 0.48181818 |            | 0.481818182 |             |           | 0.4886364 |
| ENSG00000151327 |            | 0.36111111 |            | 0.361111111 |             |           | 0.3977273 |
| ENSG00000091542 |            | 0.38787879 |            | 0.387878788 |             |           | 0.1162791 |
| ENSG00000239388 | 0.06363636 |            | 0.06363636 |             |             |           |           |
| ENSG00000127989 | 0.28089888 | 0.46666667 | 0.28089888 | 0.466666667 | 0.446428571 | 0.4941176 | 0.4772727 |
| ENSG00000197506 | 0.07317073 | 0.18902439 | 0.07317073 | 0.18902439  |             |           | 0.3139535 |
| ENSG00000198825 |            | 0.47575758 |            | 0.475757576 |             |           | 0.4058824 |
| ENSG00000183421 | 0.33888889 | 0.48484848 | 0.33888889 | 0.484848485 | 0.05952381  |           | 0.3197674 |
| ENSG00000213965 |            | 0.1625     |            | 0.1625      |             |           | 0.2083333 |
| ENSG00000130684 |            | 0.1969697  |            | 0.196969697 |             |           | 0.3139535 |
| ENSG00000205011 |            | 0.19444444 |            | 0.194444444 |             |           | 0.2386364 |
| ENSG00000188529 |            | 0.44545455 |            | 0.445454545 |             |           | 0.3235294 |
| ENSG00000117020 |            | 0.2804878  |            | 0.280487805 |             |           | 0.2674419 |
| ENSG00000169031 |            | 0.15757576 |            | 0.157575758 |             |           | 0.1802326 |
| ENSG00000187134 |            | 0.28409091 |            | 0.284090909 |             |           |           |
| ENSG00000189007 |            | 0.49393939 |            | 0.493939394 |             |           | 0.25      |
| ENSG00000136875 | 0.08333333 | 0.31818182 | 0.08333333 | 0.318181818 | 0.240963855 | 0.2411765 | 0.4186047 |
| ENSG00000114698 | 0.3        | 0.38636364 | 0.3        | 0.386363636 | 0.26744186  | 0.1785714 | 0.4176471 |
| ENSG00000134242 |            | 0.2347561  |            | 0.234756098 |             |           | 0.4360465 |
| ENSG00000188647 |            | 0.28484848 |            | 0.284848485 |             |           | 0.255814  |
| ENSG00000142192 | 0.06470588 |            | 0.06470588 |             |             |           |           |
| ENSG00000106868 |            | 0.23584906 |            | 0.235849057 |             |           | 0.2386364 |
| ENSG00000213463 |            | 0.14242424 |            | 0.142424242 |             |           | 0.4940476 |
| ENSG00000147606 |            | 0.3        |            | 0.3         |             |           |           |
| ENSG00000187838 | 0.49101796 | 0.13939394 | 0.49101796 | 0.139393939 | 0.327380952 | 0.2383721 | 0.2151163 |
| ENSG00000197928 | 0.18562874 | 0.45454545 | 0.18562874 | 0.454545455 | 0.355421687 | 0.3546512 | 0.2674419 |
| ENSG00000136147 |            | 0.45151515 |            | 0.451515152 |             |           | 0.4302326 |
| ENSG00000152926 | 0.3253012  |            | 0.3253012  |             | 0.136904762 | 0.1309524 | 0.0972222 |
| ENSG00000196502 |            |            |            |             |             |           | 0.2159091 |
| ENSG00000196090 |            | 0.45151515 |            | 0.451515152 |             |           | 0.4825581 |
| ENSG00000114200 |            | 0.19444444 |            | 0.194444444 |             |           | 0.2045455 |
| ENSG00000172273 | 0.32335329 | 0.43030303 | 0.32335329 | 0.43030303  | 0.244047619 | 0.3081395 | 0.3081395 |
| ENSG00000167210 | 0.08682635 |            | 0.08682635 |             | 0.142857143 | 0.2732558 |           |
| ENSG00000186326 |            | 0.25914634 |            | 0.259146341 |             |           | 0.3604651 |
| ENSG00000185896 |            |            |            |             |             |           | 0.1104651 |
| ENSG00000143776 | 0.37724551 | 0.5        | 0.37724551 | 0.5         | 0.357142857 | 0.4       | 0.3081395 |
| ENSG00000146374 |            |            |            |             |             |           | 0.0523256 |
| ENSG00000115750 | 0.35151515 | 0.32727273 | 0.35151515 | 0.327272727 | 0.357142857 | 0.2235294 | 0.494186  |

|                 |            |            |            |             |             |           |           |
|-----------------|------------|------------|------------|-------------|-------------|-----------|-----------|
| ENSG00000143603 | 0.43113772 |            | 0.43113772 |             | 0.113095238 |           | 0.0639535 |
| ENSG00000154645 | 0.06586826 | 0.20606061 | 0.06586826 | 0.206060606 |             |           |           |
| ENSG00000177479 | 0.05389222 |            | 0.05389222 |             |             |           |           |
| ENSG00000198182 | 0.41616766 | 0.15151515 | 0.41616766 | 0.151515152 | 0.398809524 | 0.3313953 | 0.3313953 |
| ENSG00000132204 |            |            |            |             |             |           | 0.1477273 |
| ENSG00000121390 | 0.29041916 |            | 0.29041916 |             | 0.077380952 | 0.0639535 |           |
| ENSG00000119977 | 0.17664671 | 0.33333333 | 0.17664671 | 0.333333333 |             | 0.0930233 | 0.3409091 |
| ENSG0000022556  |            | 0.49425287 |            | 0.494252874 |             |           | 0.2386364 |
| ENSG00000115353 |            | 0.14242424 |            | 0.142424242 |             |           | 0.1453488 |
| ENSG00000084453 | 0.13068182 | 0.18181818 | 0.13068182 | 0.181818182 | 0.455555556 | 0.4069767 | 0.4090909 |
| ENSG00000184117 |            | 0.39090909 |            | 0.390909091 |             |           | 0.4772727 |
| ENSG00000111679 | 0.27844311 |            | 0.27844311 |             | 0.202380952 | 0.2151163 |           |
| ENSG00000115363 | 0.35555556 |            | 0.35555556 |             | 0.375       | 0.3255814 |           |
| ENSG00000100105 |            |            |            |             |             |           | 0.4709302 |
| ENSG00000175984 |            | 0.14545455 |            | 0.145454545 |             |           | 0.372093  |
| ENSG00000258832 |            | 0.43820225 |            | 0.438202247 |             |           | 0.4318182 |
| ENSG00000134042 | 0.11212121 | 0.49695122 | 0.11212121 | 0.49695122  | 0.114457831 | 0.0882353 | 0.452381  |
| ENSG00000186377 |            |            |            |             |             | 0.0523256 |           |
| ENSG00000155827 | 0.34131737 |            | 0.34131737 |             | 0.337349398 | 0.2325581 |           |
| ENSG00000111728 | 0.06586826 | 0.47777778 | 0.06586826 | 0.477777778 | 0.119047619 |           | 0.4659091 |
| ENSG00000184672 | 0.12048193 | 0.34848485 | 0.12048193 | 0.348484848 | 0.411111111 | 0.3181818 | 0.3658537 |
| ENSG00000124529 |            | 0.38957055 |            | 0.389570552 |             |           | 0.3255814 |
| ENSG00000189143 | 0.44311377 | 0.21212121 | 0.44311377 | 0.212121212 | 0.464285714 | 0.4418605 | 0.4418605 |
| ENSG00000152207 |            | 0.42121212 |            | 0.421212121 |             |           | 0.3837209 |
| ENSG00000244025 |            | 0.49444444 |            | 0.494444444 |             |           | 0.4431818 |
| ENSG00000104325 | 0.23888889 | 0.16853933 | 0.23888889 | 0.168539326 | 0.322222222 | 0.375     | 0.3       |
| ENSG00000158089 | 0.47647059 | 0.13109756 | 0.47647059 | 0.131097561 |             |           | 0.1764706 |
| ENSG00000168434 |            | 0.11890244 |            | 0.118902439 |             |           | 0.25      |
| ENSG00000076067 |            | 0.23780488 |            | 0.237804878 |             |           | 0.3625    |
| ENSG00000023697 |            |            |            |             |             |           | 0.3295455 |
| ENSG00000114646 | 0.5        |            | 0.5        |             | 0.246987952 | 0.2380952 |           |
| ENSG00000197586 | 0.42814371 | 0.49693252 | 0.42814371 | 0.496932515 | 0.398809524 | 0.3837209 | 0.0988372 |
| ENSG00000180730 |            | 0.38181818 |            | 0.381818182 |             |           | 0.244186  |
| ENSG00000134240 |            |            |            |             | 0.06547619  |           |           |
| ENSG00000237515 |            | 0.17977528 |            | 0.179775281 |             |           | 0.2386364 |
| ENSG00000083838 |            | 0.47865854 |            | 0.478658537 |             |           | 0.25      |
| ENSG00000155729 | 0.22754491 | 0.16049383 | 0.22754491 | 0.160493827 | 0.156626506 | 0.1686047 | 0.3630952 |
| ENSG00000144893 |            | 0.42727273 |            | 0.427272727 |             |           | 0.3636364 |
| ENSG00000175029 | 0.33832335 | 0.33707865 | 0.33832335 | 0.337078652 | 0.386904762 | 0.4360465 | 0.3139535 |
| ENSG00000103599 |            | 0.25460123 |            | 0.254601227 |             |           | 0.377907  |
| ENSG00000182247 |            | 0.16666667 |            | 0.166666667 |             |           | 0.3333333 |
| ENSG00000105792 |            | 0.46111111 |            | 0.461111111 |             |           | 0.4166667 |
| ENSG00000175538 |            | 0.4969697  |            | 0.496969697 |             |           | 0.4882353 |
| ENSG00000040275 | 0.40963855 | 0.27272727 | 0.40963855 | 0.272727273 | 0.261904762 | 0.3       | 0.3081395 |
| ENSG00000120913 |            | 0.35889571 |            | 0.358895706 |             |           | 0.4705882 |
| ENSG00000006740 | 0.06586826 | 0.29268293 | 0.06586826 | 0.292682927 | 0.1875      | 0.1410256 | 0.3372093 |
| ENSG00000198353 |            |            |            |             | 0.2         | 0.1785714 |           |
| ENSG00000116903 |            | 0.39393939 |            | 0.393939394 |             |           | 0.4534884 |
| ENSG00000173402 | 0.0952381  | 0.43333333 | 0.0952381  | 0.433333333 | 0.097560976 | 0.1162791 | 0.1162791 |
| ENSG00000136709 |            | 0.2875     |            | 0.2875      |             |           | 0.2732558 |
| ENSG00000146477 |            | 0.46363636 |            | 0.463636364 |             |           | 0.4767442 |
| ENSG00000029725 |            | 0.44848485 |            | 0.448484848 |             |           | 0.375     |
| ENSG00000114923 | 0.25151515 | 0.14545455 | 0.25151515 | 0.145454545 |             |           | 0.1453488 |
| ENSG00000106538 | 0.16167665 | 0.34545455 | 0.16167665 | 0.345454545 | 0.295454545 | 0.4333333 | 0.3977273 |

|                 |            |            |            |             |             |           |           |
|-----------------|------------|------------|------------|-------------|-------------|-----------|-----------|
| ENSG00000203668 |            | 0.36363636 |            | 0.363636364 |             |           | 0.2235294 |
| ENSG00000145014 |            | 0.1993865  |            | 0.199386503 |             |           | 0.2470588 |
| ENSG00000170893 | 0.33532934 |            | 0.33532934 |             | 0.339285714 | 0.3197674 |           |
| ENSG00000137824 | 0.10606061 |            | 0.10606061 |             |             |           |           |
| ENSG00000183688 |            | 0.42528736 |            | 0.425287356 |             |           | 0.125     |
| ENSG00000198546 |            |            |            |             |             |           | 0.0988372 |
| ENSG00000234127 | 0.37125749 | 0.31288344 | 0.37125749 | 0.312883436 | 0.277777778 | 0.3068182 | 0.1411765 |
| ENSG00000178096 | 0.49101796 |            | 0.49101796 |             |             |           |           |
| ENSG00000038274 |            | 0.45757576 |            | 0.457575758 |             |           | 0.3139535 |
| ENSG00000127377 |            | 0.06363636 |            | 0.063636364 |             |           |           |
| ENSG00000132122 |            | 0.39444444 |            | 0.394444444 |             |           | 0.2       |
| ENSG00000054392 |            | 0.28181818 |            | 0.281818182 |             |           | 0.3662791 |
| ENSG00000099949 | 0.46706587 | 0.16666667 | 0.46706587 | 0.166666667 |             |           | 0.25      |
| ENSG00000171346 | 0.46686747 | 0.16969697 | 0.46686747 | 0.16969697  | 0.095238095 | 0.0588235 |           |
| ENSG00000118880 |            | 0.13414634 |            | 0.134146341 |             |           | 0.2647059 |
| ENSG00000075461 |            | 0.31609195 |            | 0.316091954 |             |           | 0.3636364 |
| ENSG00000170385 |            | 0.18390805 |            | 0.183908046 |             |           | 0.4772727 |
| ENSG00000251537 |            | 0.465625   |            | 0.465625    |             |           | 0.1294118 |
| ENSG00000054983 | 0.24698795 | 0.48757764 | 0.24698795 | 0.48757764  | 0.077380952 | 0.0872093 | 0.4651163 |
| ENSG00000165113 |            | 0.37222222 |            | 0.372222222 |             |           | 0.2840909 |
| ENSG00000107518 |            | 0.10606061 |            | 0.106060606 |             |           | 0.2222222 |
| ENSG00000213022 |            | 0.44242424 |            | 0.442424242 |             |           | 0.255814  |
| ENSG00000259003 |            | 0.48780488 |            | 0.487804878 |             |           | 0.2906977 |
| ENSG00000198689 |            |            |            |             |             |           | 0.1395349 |
| ENSG00000130844 | 0.36060606 | 0.25151515 | 0.36060606 | 0.251515152 | 0.43452381  | 0.4360465 | 0.2790698 |
| ENSG00000137875 | 0.32758621 | 0.13636364 | 0.32758621 | 0.136363636 | 0.21875     | 0.0681818 | 0.1802326 |
| ENSG00000144645 |            | 0.32098765 |            | 0.320987654 |             |           | 0.3588235 |
| ENSG00000109576 |            | 0.0617284  |            | 0.061728395 |             |           |           |
| ENSG00000145692 |            | 0.31460674 |            | 0.314606742 |             |           | 0.125     |
| ENSG00000127481 | 0.29341317 | 0.31097561 | 0.29341317 | 0.31097561  | 0.363095238 | 0.4069767 | 0.1529412 |
| ENSG00000182552 | 0.08682635 | 0.24085366 | 0.08682635 | 0.240853659 | 0.267857143 | 0.3837209 | 0.1569767 |
| ENSG00000183762 |            | 0.30246914 |            | 0.302469136 |             |           | 0.3313953 |
| ENSG00000158050 |            | 0.46363636 |            | 0.463636364 |             |           | 0.3255814 |
| ENSG00000186496 |            | 0.43333333 |            | 0.433333333 |             |           | 0.4868421 |
| ENSG00000176095 |            | 0.45757576 |            | 0.457575758 |             |           | 0.2383721 |
| ENSG00000140396 |            | 0.10555556 |            | 0.105555556 |             |           | 0.1477273 |
| ENSG00000169403 | 0.14371257 |            | 0.14371257 |             |             |           |           |
| ENSG00000144229 |            | 0.35403727 |            | 0.354037267 |             |           | 0.125     |
| ENSG00000163468 | 0.10479042 |            | 0.10479042 |             | 0.178571429 | 0.2209302 | 0.2444444 |
| ENSG00000183828 |            | 0.39444444 |            | 0.394444444 |             |           | 0.4888889 |
| ENSG00000106261 |            | 0.33636364 |            | 0.336363636 |             |           | 0.4941176 |
| ENSG00000143756 |            | 0.44848485 |            | 0.448484848 |             |           | 0.4883721 |
| ENSG00000172795 | 0.18263473 | 0.496875   | 0.18263473 | 0.496875    | 0.261904762 | 0.2383721 | 0.4390244 |
| ENSG00000102290 |            | 0.25280899 |            | 0.252808989 |             |           | 0.2333333 |
| ENSG00000132768 |            | 0.21515152 |            | 0.215151515 |             |           | 0.4476744 |
| ENSG00000198842 |            | 0.14242424 |            | 0.142424242 |             |           | 0.0988372 |
| ENSG00000250506 |            | 0.2247191  |            | 0.224719101 | 0.077380952 | 0.1511628 | 0.1666667 |
| ENSG00000101074 |            | 0.14242424 |            | 0.142424242 |             |           |           |
| ENSG00000144120 |            | 0.19101124 |            | 0.191011236 | 0.162790698 | 0.1395349 | 0.1888889 |
| ENSG00000198885 | 0.29341317 |            | 0.29341317 |             |             |           |           |
| ENSG00000138829 |            | 0.14044944 |            | 0.140449438 |             |           | 0.0681818 |
| ENSG00000137038 |            |            |            |             | 0.172619048 | 0.1395349 | 0.2840909 |
| ENSG00000099942 |            | 0.3        |            | 0.3         |             |           | 0.2142857 |
| ENSG00000110274 | 0.10479042 | 0.35757576 | 0.10479042 | 0.357575758 |             |           | 0.4883721 |

|                 |            |            |            |             |             |           |           |
|-----------------|------------|------------|------------|-------------|-------------|-----------|-----------|
| ENSG00000119231 |            | 0.20552147 |            | 0.205521472 |             |           | 0.1176471 |
| ENSG00000158406 | 0.16167665 |            | 0.16167665 |             | 0.089285714 |           |           |
| ENSG00000140575 |            | 0.4054878  |            | 0.405487805 |             |           | 0.4186047 |
| ENSG00000140553 |            | 0.23333333 |            | 0.233333333 |             |           | 0.4767442 |
| ENSG00000115392 |            | 0.10465116 |            | 0.104651163 |             |           | 0.0568182 |
| ENSG00000127081 |            | 0.39444444 |            | 0.394444444 |             |           | 0.3181818 |
| ENSG00000177432 | 0.37125749 |            | 0.37125749 |             | 0.494047619 |           | 0.4011628 |
| ENSG00000204366 | 0.06666667 |            | 0.06666667 |             | 0.355555556 |           | 0.4886364 |
| ENSG00000169598 |            | 0.46969697 |            | 0.46969697  |             |           | 0.4825581 |
| ENSG00000163214 |            | 0.46060606 |            | 0.460606061 |             |           | 0.2209302 |
| ENSG00000182220 |            |            |            |             |             |           | 0.1918605 |
| ENSG00000143815 |            | 0.14848485 |            | 0.148484848 |             |           | 0.0666667 |
| ENSG00000224236 |            |            |            |             |             |           | 0.372093  |
| ENSG00000113282 |            | 0.42073171 |            | 0.420731707 |             |           | 0.2674419 |
| ENSG00000175216 |            | 0.11818182 |            | 0.118181818 |             |           | 0.3895349 |
| ENSG00000088305 |            | 0.44545455 |            | 0.445454545 |             |           | 0.122093  |
| ENSG00000173597 |            | 0.4030303  |            | 0.403030303 |             |           | 0.4011628 |
| ENSG00000138182 |            |            |            |             | 0.288888889 |           | 0.1818182 |
| ENSG00000135074 | 0.07831325 | 0.46666667 | 0.07831325 | 0.466666667 |             |           | 0.3488372 |
| ENSG00000215375 | 0.10843373 |            | 0.10843373 |             |             |           |           |
| ENSG00000103035 |            | 0.33030303 |            | 0.33030303  |             |           | 0.2383721 |
| ENSG00000007001 | 0.39444444 | 0.05757576 | 0.39444444 | 0.057575758 | 0.155555556 | 0.1104651 | 0.2034884 |
| ENSG00000140983 |            | 0.08181818 |            | 0.081818182 |             |           | 0.3139535 |
| ENSG00000109680 |            | 0.46273292 |            | 0.462732919 |             |           |           |
| ENSG00000243927 |            | 0.34545455 |            | 0.345454545 |             |           | 0.1647059 |
| ENSG00000185189 |            | 0.41666667 |            | 0.416666667 |             |           |           |
| ENSG00000157020 | 0.07432432 | 0.41463415 | 0.07432432 | 0.414634146 | 0.078947368 | 0.1111111 | 0.3895349 |
| ENSG00000006194 | 0.48493976 | 0.21818182 | 0.48493976 | 0.218181818 |             |           |           |
| ENSG00000227164 |            | 0.33030303 |            | 0.33030303  |             |           | 0.0930233 |
| ENSG00000229200 | 0.45705521 |            | 0.45705521 |             |             |           |           |
| ENSG00000179407 | 0.30120482 |            | 0.30120482 |             | 0.226190476 |           | 0.2674419 |
| ENSG00000105954 |            | 0.26829268 |            | 0.268292683 |             |           | 0.1529412 |
| ENSG00000173227 |            | 0.06134969 |            | 0.061349693 | 0.055555556 | 0.0568182 | 0.2209302 |
| ENSG00000158014 |            | 0.35060976 |            | 0.350609756 |             |           | 0.2176471 |
| ENSG00000185585 |            | 0.09393939 |            | 0.093939394 |             |           | 0.4204545 |
| ENSG00000130640 | 0.18674699 |            | 0.18674699 |             |             |           |           |
| ENSG00000185960 |            | 0.34969325 |            | 0.349693252 | 0.43902439  | 0.4878049 | 0.372093  |
| ENSG00000186998 |            | 0.21202532 |            | 0.212025316 |             |           | 0.2954545 |
| ENSG00000131697 | 0.13473054 | 0.43030303 | 0.13473054 | 0.43030303  |             |           | 0.2529412 |
| ENSG00000147010 | 0.06287425 |            | 0.06287425 |             |             |           |           |
| ENSG00000111271 | 0.16969697 |            | 0.16969697 |             | 0.428571429 |           | 0.4011628 |
| ENSG00000006555 |            | 0.06969697 |            | 0.06969697  |             |           | 0.4883721 |
| ENSG00000139133 |            | 0.17378049 |            | 0.173780488 | 0.071428571 |           | 0.1686047 |
| ENSG00000158042 |            | 0.11515152 |            | 0.115151515 |             |           | 0.3430233 |
| ENSG00000164219 |            | 0.35670732 |            | 0.356707317 |             |           | 0.2470588 |
| ENSG00000148411 |            | 0.06111111 |            | 0.061111111 |             |           | 0.3295455 |
| ENSG00000205745 |            | 0.40606061 |            | 0.406060606 |             |           | 0.377907  |
| ENSG00000178773 |            | 0.17878788 |            | 0.178787879 |             |           | 0.2616279 |
| ENSG00000002016 | 0.43333333 | 0.45977011 | 0.43333333 | 0.459770115 | 0.311111111 | 0.3636364 | 0.4767442 |
| ENSG00000160551 |            | 0.18181818 |            | 0.181818182 |             |           |           |
| ENSG00000177917 |            | 0.2030303  |            | 0.203030303 |             |           | 0.2790698 |
| ENSG00000185087 |            | 0.18787879 |            | 0.187878788 |             |           | 0.2034884 |
| ENSG00000135363 | 0.20359281 | 0.46363636 | 0.20359281 | 0.463636364 | 0.363095238 | 0.3372093 | 0.4360465 |
| ENSG00000100815 |            | 0.43939394 |            | 0.439393939 | 0.102272727 | 0.1111111 | 0.4127907 |

|                 |            |            |            |             |             |           |           |
|-----------------|------------|------------|------------|-------------|-------------|-----------|-----------|
| ENSG00000136750 | 0.13772455 | 0.19178082 | 0.13772455 | 0.191780822 | 0.333333333 | 0.4651163 | 0.4166667 |
| ENSG00000174844 | 0.10479042 |            | 0.10479042 |             | 0.43452381  | 0.4767442 |           |
| ENSG00000258315 | 0.09883721 |            | 0.09883721 |             |             |           |           |
| ENSG00000170145 |            | 0.23033708 |            | 0.230337079 |             |           | 0.2333333 |
| ENSG00000145642 |            | 0.3        |            | 0.3         |             |           | 0.4431818 |
| ENSG00000197408 |            | 0.39090909 |            | 0.390909091 |             |           | 0.3604651 |
| ENSG00000126947 | 0.28915663 |            | 0.28915663 |             | 0.188888889 | 0.125     |           |
| ENSG00000183484 | 0.36526946 | 0.07272727 | 0.36526946 | 0.072727273 | 0.44047619  | 0.4360465 | 0.3313953 |
| ENSG00000134909 |            | 0.43251534 |            | 0.432515337 |             |           | 0.4011628 |
| ENSG00000124571 | 0.07865169 | 0.41515152 | 0.07865169 | 0.415151515 |             |           | 0.4186047 |
| ENSG00000011132 | 0.34482759 | 0.0969697  | 0.34482759 | 0.096969697 | 0.322222222 | 0.25      | 0.1428571 |
| ENSG00000123977 | 0.4491018  | 0.2        | 0.4491018  | 0.2         | 0.470238095 | 0.4593023 | 0.1111111 |
| ENSG00000171456 |            | 0.35454545 |            | 0.354545455 |             |           | 0.3197674 |
| ENSG00000109943 |            | 0.20606061 |            | 0.206060606 |             |           | 0.3837209 |
| ENSG00000120254 |            | 0.3        |            | 0.3         |             |           | 0.4431818 |
| ENSG00000111490 |            | 0.5        |            | 0.5         |             |           | 0.2674419 |
| ENSG00000132334 | 0.21165644 | 0.44207317 | 0.21165644 | 0.442073171 | 0.416666667 | 0.4529412 | 0.4883721 |
| ENSG00000162591 |            | 0.11890244 |            | 0.118902439 |             |           | 0.1395349 |
| ENSG00000174405 | 0.14444444 | 0.0969697  | 0.14444444 | 0.096969697 |             |           | 0.1444444 |
| ENSG00000141338 | 0.27245509 |            | 0.27245509 |             | 0.18452381  | 0.2034884 |           |
| ENSG00000134986 |            | 0.5        |            | 0.5         |             | 0.0755814 | 0.4294118 |
| ENSG00000109832 | 0.40718563 |            | 0.40718563 |             | 0.095238095 | 0.1627907 |           |
| ENSG00000166819 |            | 0.34444444 |            | 0.344444444 |             |           | 0.3863636 |
| ENSG00000099940 | 0.37951807 | 0.46060606 | 0.37951807 | 0.460606061 | 0.333333333 | 0.3837209 | 0.4941176 |
| ENSG00000108278 | 0.49700599 |            | 0.49700599 |             | 0.43452381  | 0.4069767 |           |
| ENSG00000008300 |            | 0.12643678 |            | 0.126436782 |             |           | 0.0568182 |
| ENSG00000111536 |            | 0.06060606 |            | 0.060606061 |             |           | 0.4476744 |
| ENSG00000023330 |            | 0.44545455 |            | 0.445454545 |             |           | 0.494186  |
| ENSG00000162981 |            | 0.34848485 |            | 0.348484848 |             |           | 0.4186047 |
| ENSG00000156096 | 0.32777778 | 0.32727273 | 0.32777778 | 0.327272727 | 0.177777778 | 0.1818182 | 0.3895349 |
| ENSG00000130208 |            | 0.06666667 |            | 0.066666667 |             |           |           |
| ENSG00000111783 | 0.19078947 | 0.43636364 | 0.19078947 | 0.436363636 | 0.127906977 | 0.0731707 | 0.2647059 |
| ENSG00000102100 |            | 0.42727273 |            | 0.427272727 |             |           | 0.2383721 |
| ENSG00000118194 |            |            |            |             |             |           | 0.0755814 |
| ENSG00000176659 | 0.22530864 | 0.46511628 | 0.22530864 | 0.465116279 | 0.379518072 | 0.3488372 | 0.2380952 |
| ENSG00000120820 |            |            |            |             | 0.321428571 | 0.3546512 |           |
| ENSG00000142669 | 0.14071856 | 0.13333333 | 0.14071856 | 0.133333333 |             |           |           |
| ENSG00000113249 | 0.13772455 |            | 0.13772455 |             |             |           |           |
| ENSG00000184845 | 0.16167665 | 0.44545455 | 0.16167665 | 0.445454545 | 0.261904762 | 0.2674419 | 0.4534884 |
| ENSG00000137080 |            | 0.15757576 |            | 0.157575758 |             |           | 0.4883721 |
| ENSG00000116044 |            | 0.37804878 |            | 0.37804878  |             |           |           |
| ENSG00000182134 | 0.46666667 | 0.48787879 | 0.46666667 | 0.487878788 | 0.477777778 | 0.3409091 | 0.4302326 |
| ENSG00000048471 |            | 0.46932515 |            | 0.469325153 |             |           | 0.4529412 |
| ENSG00000168955 | 0.17964072 | 0.17272727 | 0.17964072 | 0.172727273 | 0.119047619 | 0.0581395 | 0.2034884 |
| ENSG00000166881 |            | 0.3902439  |            | 0.390243902 |             |           | 0.2848837 |
| ENSG00000196586 |            | 0.4556962  |            | 0.455696203 |             |           | 0.3647059 |
| ENSG00000100271 | 0.27586207 | 0.42727273 | 0.27586207 | 0.427272727 | 0.142857143 | 0.0609756 | 0.3255814 |
| ENSG00000063169 |            | 0.2        |            | 0.2         |             |           | 0.3139535 |
| ENSG00000060237 | 0.49700599 | 0.27439024 | 0.49700599 | 0.274390244 | 0.458333333 | 0.4825581 | 0.1860465 |
| ENSG00000170743 |            | 0.47575758 |            | 0.475757576 |             |           | 0.3662791 |
| ENSG00000196704 | 0.05688623 |            | 0.05688623 |             | 0.210843373 | 0.2906977 |           |
| ENSG00000164171 |            | 0.34545455 |            | 0.345454545 |             |           | 0.4888889 |
| ENSG00000003436 |            |            |            |             |             |           | 0.0681818 |
| ENSG00000150995 | 0.4491018  |            | 0.4491018  |             | 0.267857143 | 0.3953488 |           |



|                 |            |            |            |             |             |           |           |
|-----------------|------------|------------|------------|-------------|-------------|-----------|-----------|
| ENSG00000159173 | 0.40419162 | 0.45       | 0.40419162 | 0.45        | 0.31547619  | 0.4302326 | 0.4244186 |
| ENSG00000213903 | 0.06741573 | 0.45402299 | 0.06741573 | 0.454022989 | 0.144444444 | 0.2272727 | 0.1704545 |
| ENSG00000175110 | 0.07777778 | 0.46666667 | 0.07777778 | 0.46666667  |             |           |           |
| ENSG00000215067 |            | 0.08181818 |            | 0.081818182 |             |           | 0.2093023 |
| ENSG00000137975 |            | 0.14367816 |            | 0.143678161 |             |           |           |
| ENSG00000215397 |            | 0.37195122 |            | 0.37195122  |             |           | 0.3372093 |
| ENSG00000064687 |            | 0.31034483 |            | 0.310344828 | 0.273809524 | 0.3953488 | 0.3597561 |
| ENSG00000063978 | 0.08426966 | 0.17272727 | 0.08426966 | 0.172727273 | 0.097560976 | 0.1410256 | 0.1104651 |
| ENSG00000182901 | 0.125      | 0.10606061 | 0.125      | 0.106060606 |             |           | 0.1453488 |
| ENSG00000133985 |            | 0.48787879 |            | 0.487878788 |             |           | 0.4302326 |
| ENSG00000141446 | 0.05688623 |            | 0.05688623 |             |             |           |           |
| ENSG00000125434 | 0.32335329 |            | 0.32335329 |             | 0.422619048 | 0.4534884 | 0.3977273 |
| ENSG00000164061 |            | 0.48181818 |            | 0.481818182 |             |           | 0.2848837 |
| ENSG00000068354 |            | 0.43251534 |            | 0.432515337 |             |           | 0.4244186 |
| ENSG00000131435 |            | 0.13953488 |            | 0.139534884 |             |           | 0.4886364 |
| ENSG00000150594 |            | 0.15454545 |            | 0.154545455 |             |           | 0.4476744 |
| ENSG00000136810 |            | 0.48484848 |            | 0.484848485 |             | 0.0535714 |           |
| ENSG00000197712 |            | 0.46363636 |            | 0.463636364 |             |           | 0.4825581 |
| ENSG00000082014 | 0.41916168 |            | 0.41916168 |             |             | 0.0697674 |           |
| ENSG00000172113 |            | 0.33231707 |            | 0.332317073 |             |           | 0.122093  |
| ENSG00000139372 | 0.16111111 |            | 0.16111111 |             |             |           |           |
| ENSG00000196361 |            |            |            |             |             |           | 0.0595238 |
| ENSG00000087502 |            | 0.20481928 |            | 0.204819277 |             |           | 0.3375    |
| ENSG00000198873 | 0.3045977  |            | 0.3045977  |             |             |           |           |
| ENSG00000134438 |            | 0.28484848 |            | 0.284848485 |             |           | 0.2034884 |
| ENSG00000153029 |            | 0.47191011 |            | 0.471910112 |             |           | 0.4888889 |
| ENSG00000146039 |            | 0.2969697  |            | 0.296969697 |             |           | 0.3953488 |
| ENSG00000157881 |            | 0.3        |            | 0.3         |             |           | 0.4545455 |
| ENSG00000185052 |            | 0.42424242 |            | 0.424242424 |             |           | 0.4418605 |
| ENSG00000149485 | 0.14071856 | 0.37790698 | 0.14071856 | 0.377906977 | 0.340909091 | 0.3111111 | 0.3111111 |
| ENSG00000070444 |            | 0.05151515 |            | 0.051515152 |             |           | 0.1686047 |
| ENSG00000103034 | 0.33532934 | 0.32424242 | 0.33532934 | 0.324242424 | 0.25        | 0.1744186 | 0.4127907 |
| ENSG00000018189 | 0.34730539 | 0.4        | 0.34730539 | 0.4         |             |           | 0.4107143 |
| ENSG00000149534 | 0.4760479  |            | 0.4760479  |             | 0.34939759  | 0.3372093 | 0.1453488 |
| ENSG00000174450 | 0.41011236 |            | 0.41011236 |             | 0.166666667 | 0.1477273 |           |
| ENSG00000213639 |            | 0.5        |            | 0.5         |             |           | 0.25      |
| ENSG00000198093 | 0.41317365 | 0.13333333 | 0.41317365 | 0.133333333 | 0.238095238 | 0.25      | 0.2325581 |
| ENSG00000153046 | 0.45808383 | 0.29141104 | 0.45808383 | 0.291411043 | 0.232142857 | 0.1744186 | 0.1428571 |
| ENSG00000140299 |            | 0.35757576 |            | 0.357575758 | 0.380952381 | 0.3684211 | 0.4476744 |
| ENSG00000178074 |            | 0.21515152 |            | 0.215151515 |             |           | 0.1802326 |
| ENSG00000076201 |            | 0.43939394 |            | 0.439393939 |             |           | 0.4709302 |
| ENSG00000169682 |            | 0.28089888 |            | 0.280898876 |             |           | 0.0681818 |
| ENSG00000183891 | 0.48333333 |            | 0.48333333 |             | 0.4         | 0.2386364 |           |
| ENSG00000160991 | 0.36526946 | 0.2804878  | 0.36526946 | 0.280487805 | 0.446428571 | 0.4476744 | 0.4941176 |
| ENSG00000123992 |            | 0.10909091 |            | 0.109090909 |             |           | 0.2209302 |
| ENSG00000107130 |            | 0.46060606 |            | 0.460606061 |             |           | 0.2261905 |
| ENSG00000105366 |            | 0.23333333 |            | 0.233333333 |             |           | 0.3863636 |
| ENSG00000146021 |            | 0.46363636 |            | 0.463636364 |             |           | 0.494186  |
| ENSG00000122952 |            | 0.17575758 |            | 0.175757576 | 0.089285714 | 0.0755814 |           |
| ENSG00000009694 |            | 0.2030303  |            | 0.203030303 |             |           | 0.3352941 |
| ENSG00000066468 | 0.47305389 | 0.43939394 | 0.47305389 | 0.439393939 | 0.279761905 | 0.2093023 | 0.3604651 |
| ENSG00000150977 |            | 0.39197531 |            | 0.391975309 |             |           | 0.2613636 |
| ENSG00000197771 |            | 0.46590909 |            | 0.465909091 |             |           | 0.4431818 |
| ENSG00000168907 |            | 0.5        |            | 0.5         |             |           | 0.3636364 |

|                 |            |            |            |             |             |           |           |
|-----------------|------------|------------|------------|-------------|-------------|-----------|-----------|
| ENSG00000203392 |            | 0.47575758 |            | 0.475757576 |             |           | 0.2848837 |
| ENSG0000052795  |            | 0.43030303 |            | 0.43030303  |             |           | 0.1294118 |
| ENSG00000165819 | 0.17816092 | 0.47878788 | 0.17816092 | 0.478787879 |             |           | 0.2848837 |
| ENSG00000197165 |            | 0.38271605 |            | 0.382716049 |             |           | 0.1084337 |
| ENSG00000132693 |            | 0.33333333 |            | 0.333333333 |             |           | 0.2965116 |
| ENSG00000101413 | 0.3742515  |            | 0.3742515  |             | 0.154761905 | 0.1395349 |           |
| ENSG00000185811 |            | 0.30898876 |            | 0.308988764 |             |           | 0.1130952 |
| ENSG00000162433 | 0.06287425 | 0.4        | 0.06287425 | 0.4         | 0.086419753 | 0.1309524 | 0.3068182 |
| ENSG00000180957 |            | 0.23170732 |            | 0.231707317 |             |           | 0.1918605 |
| ENSG00000185818 |            | 0.13375796 |            | 0.133757962 |             |           | 0.2386364 |
| ENSG00000179709 |            | 0.22121212 |            | 0.221212121 |             |           | 0.244186  |
| ENSG00000114124 |            | 0.11875    |            | 0.11875     |             |           |           |
| ENSG00000076242 | 0.46067416 | 0.33636364 | 0.46067416 | 0.336363636 | 0.446428571 | 0.494186  | 0.0639535 |
| ENSG00000215114 |            | 0.2752809  |            | 0.275280899 |             |           | 0.25      |
| ENSG00000178726 |            | 0.36503067 |            | 0.365030675 |             |           | 0.255814  |
| ENSG00000124882 | 0.28181818 | 0.20987654 | 0.28181818 | 0.209876543 | 0.130952381 | 0.0872093 | 0.2588235 |
| ENSG00000100167 |            | 0.31515152 |            | 0.315151515 |             |           | 0.1104651 |
| ENSG00000197444 | 0.10778443 | 0.46067416 | 0.10778443 | 0.460674157 | 0.077380952 | 0.1046512 | 0.1162791 |
| ENSG00000168405 | 0.35       | 0.15151515 | 0.35       | 0.151515152 | 0.416666667 | 0.377907  | 0.1176471 |
| ENSG00000187790 |            | 0.10909091 |            | 0.109090909 |             |           | 0.1511628 |
| ENSG00000141012 |            | 0.31097561 |            | 0.31097561  |             |           | 0.5       |
| ENSG00000084652 |            | 0.06666667 |            | 0.066666667 |             |           | 0.1860465 |
| ENSG00000163568 | 0.06325301 |            | 0.06325301 |             | 0.297619048 | 0.4186047 |           |
| ENSG00000133962 |            | 0.43258427 |            | 0.43258427  |             |           | 0.0666667 |
| ENSG00000173486 |            |            |            |             |             |           | 0.3       |
| ENSG00000163864 | 0.38202247 | 0.28333333 | 0.38202247 | 0.283333333 | 0.377777778 | 0.3977273 | 0.3977273 |
| ENSG00000153157 | 0.35628743 | 0.29090909 | 0.35628743 | 0.290909091 | 0.444444444 | 0.3837209 | 0.3546512 |
| ENSG00000157625 | 0.05688623 | 0.42073171 | 0.05688623 | 0.420731707 | 0.244047619 | 0.2848837 | 0.5       |
| ENSG00000174456 | 0.45808383 |            | 0.45808383 |             | 0.05952381  | 0.1337209 | 0.0777778 |
| ENSG00000165591 |            | 0.18787879 |            | 0.187878788 |             |           | 0.2616279 |
| ENSG00000116990 |            | 0.26060606 |            | 0.260606061 |             |           |           |
| ENSG00000159618 | 0.44011976 | 0.19662921 | 0.44011976 | 0.196629213 | 0.5         | 0.4176471 | 0.4555556 |
| ENSG00000166295 |            |            |            |             |             |           | 0.1222222 |
| ENSG00000090432 |            | 0.36363636 |            | 0.363636364 | 0.122222222 | 0.0909091 | 0.0941176 |
| ENSG00000213390 |            | 0.36363636 |            | 0.363636364 |             |           | 0.3139535 |
| ENSG00000121680 | 0.21022727 | 0.25151515 | 0.21022727 | 0.251515152 | 0.477777778 | 0.3636364 | 0.1411765 |
| ENSG00000120949 | 0.21022727 | 0.22560976 | 0.21022727 | 0.225609756 | 0.333333333 | 0.2906977 | 0.2906977 |
| ENSG00000085982 |            | 0.375      |            | 0.375       |             |           | 0.1627907 |
| ENSG00000167037 |            | 0.30357143 |            | 0.303571429 |             |           | 0.4886364 |
| ENSG00000147573 | 0.1257485  |            | 0.1257485  |             |             |           |           |
| ENSG00000127483 |            | 0.06666667 |            | 0.066666667 | 0.113095238 | 0.1686047 |           |
| ENSG00000105996 |            | 0.09090909 |            | 0.090909091 |             |           |           |
| ENSG00000026559 | 0.27245509 | 0.38484848 | 0.27245509 | 0.384848485 | 0.446428571 | 0.3255814 | 0.3255814 |
| ENSG00000105398 | 0.06586826 | 0.23863636 | 0.06586826 | 0.238636364 |             |           | 0.2840909 |
| ENSG00000156876 |            | 0.10555556 |            | 0.105555556 |             |           | 0.1190476 |
| ENSG00000137642 | 0.18263473 | 0.44444444 | 0.18263473 | 0.444444444 |             |           | 0.4431818 |
| ENSG00000140022 |            | 0.11046512 |            | 0.110465116 |             |           |           |
| ENSG00000106992 |            | 0.17272727 |            | 0.172727273 |             |           | 0.122093  |
| ENSG00000182463 |            | 0.39393939 |            | 0.393939394 |             |           | 0.2034884 |
| ENSG00000108239 |            | 0.43030303 |            | 0.43030303  |             |           | 0.2325581 |
| ENSG00000232382 | 0.12359551 |            | 0.12359551 |             | 0.155555556 | 0.1111111 |           |
| ENSG00000151962 |            | 0.12727273 |            | 0.127272727 |             |           | 0.4883721 |
| ENSG00000114978 | 0.26666667 | 0.11515152 | 0.26666667 | 0.115151515 | 0.4         | 0.25      | 0.3023256 |
| ENSG00000205790 | 0.24850299 |            | 0.24850299 |             | 0.301204819 | 0.25      |           |

|                 |            |            |            |             |             |           |           |
|-----------------|------------|------------|------------|-------------|-------------|-----------|-----------|
| ENSG00000198477 |            | 0.13068182 |            | 0.130681818 |             |           | 0.2650602 |
| ENSG0000078668  |            | 0.05757576 |            | 0.057575758 |             |           | 0.2151163 |
| ENSG00000149547 |            | 0.11666667 |            | 0.116666667 |             |           |           |
| ENSG00000165682 |            | 0.38787879 |            | 0.387878788 |             |           | 0.2906977 |
| ENSG00000171119 | 0.30538922 |            | 0.30538922 |             | 0.439759036 |           | 0.4302326 |
| ENSG00000205208 |            | 0.38333333 |            | 0.383333333 |             |           | 0.2093023 |
| ENSG00000103044 |            | 0.08333333 |            | 0.083333333 |             |           |           |
| ENSG00000175426 | 0.26047904 | 0.26666667 | 0.26047904 | 0.266666667 | 0.30952381  | 0.3023256 | 0.2034884 |
| ENSG00000116883 |            |            |            |             | 0.06547619  | 0.1104651 |           |
| ENSG00000170412 | 0.34659091 | 0.23030303 | 0.34659091 | 0.23030303  | 0.155555556 | 0.1477273 | 0.2151163 |
| ENSG00000111664 |            | 0.34545455 |            | 0.345454545 |             |           | 0.2906977 |
| ENSG00000188493 | 0.12222222 | 0.10606061 | 0.12222222 | 0.106060606 | 0.355555556 | 0.2848837 | 0.1511628 |
| ENSG00000177932 |            | 0.43820225 |            | 0.438202247 | 0.077380952 | 0.1046512 | 0.494186  |
| ENSG00000166840 | 0.18562874 | 0.34848485 | 0.18562874 | 0.348484848 | 0.446428571 | 0.3372093 | 0.3604651 |
| ENSG00000204388 |            | 0.22289157 |            | 0.22289157  | 0.060240964 | 0.0833333 |           |
| ENSG00000092094 | 0.47904192 |            | 0.47904192 |             | 0.428571429 | 0.4823529 |           |
| ENSG00000159307 |            | 0.38181818 |            | 0.381818182 |             |           | 0.1744186 |
| ENSG00000144230 |            | 0.29938272 |            | 0.299382716 |             |           | 0.1927711 |
| ENSG00000152315 |            | 0.42727273 |            | 0.427272727 |             |           | 0.4302326 |
| ENSG00000155961 |            | 0.18181818 |            | 0.181818182 |             |           | 0.1569767 |
| ENSG00000175895 |            | 0.08888889 |            | 0.088888889 |             |           |           |
| ENSG00000005513 |            | 0.49393939 |            | 0.493939394 |             |           | 0.372093  |
| ENSG00000151914 |            | 0.27878788 |            | 0.278787879 |             |           | 0.3081395 |
| ENSG00000247626 |            | 0.16969697 |            | 0.16969697  |             |           | 0.2034884 |
| ENSG00000131149 |            | 0.36363636 |            | 0.363636364 |             |           | 0.494186  |
| ENSG00000148218 | 0.30838323 | 0.38181818 | 0.30838323 | 0.381818182 |             |           | 0.4069767 |
| ENSG00000188368 | 0.05688623 |            | 0.05688623 |             |             |           |           |
| ENSG00000116641 |            | 0.32222222 |            | 0.322222222 |             |           | 0.1176471 |
| ENSG00000118961 |            | 0.40853659 |            | 0.408536585 |             |           | 0.3837209 |
| ENSG00000204065 |            |            |            |             |             |           | 0.125     |
| ENSG00000171659 | 0.12048193 | 0.18333333 | 0.12048193 | 0.183333333 |             | 0.0581395 | 0.0568182 |
| ENSG00000171169 | 0.30239521 |            | 0.30239521 |             | 0.19047619  | 0.2616279 |           |
| ENSG00000065911 |            | 0.44444444 |            | 0.444444444 |             |           | 0.2727273 |
| ENSG00000116288 | 0.21987952 |            | 0.21987952 |             | 0.297619048 | 0.4011628 |           |
| ENSG00000157538 |            | 0.17977528 |            | 0.179775281 |             |           | 0.0681818 |
| ENSG00000115107 | 0.19101124 | 0.26969697 | 0.19101124 | 0.26969697  | 0.407407407 | 0.255814  | 0.3488372 |
| ENSG00000119699 |            | 0.22727273 |            | 0.227272727 |             |           | 0.4651163 |
| ENSG00000128039 |            | 0.34848485 |            | 0.348484848 |             |           | 0.255814  |
| ENSG00000111432 |            | 0.34269663 |            | 0.342696629 |             |           | 0.4651163 |
| ENSG00000092978 | 0.27777778 | 0.4494382  | 0.27777778 | 0.449438202 | 0.2         | 0.1931818 | 0.1931818 |
| ENSG00000109072 | 0.34730539 |            | 0.34730539 |             | 0.273809524 | 0.2267442 |           |
| ENSG00000146047 |            | 0.08522727 |            | 0.085227273 |             |           | 0.0697674 |
| ENSG00000165410 |            | 0.16158537 |            | 0.161585366 |             |           | 0.1764706 |
| ENSG00000012223 | 0.15269461 | 0.07878788 | 0.15269461 | 0.078787879 | 0.398809524 | 0.3546512 | 0.2151163 |
| ENSG00000145936 | 0.13664596 | 0.33030303 | 0.13664596 | 0.33030303  | 0.380952381 | 0.2882353 | 0.4534884 |
| ENSG00000083223 | 0.10479042 | 0.47222222 | 0.10479042 | 0.472222222 | 0.5         | 0.3488372 | 0.3546512 |
| ENSG00000169519 | 0.31437126 |            | 0.31437126 |             | 0.476190476 | 0.4709302 |           |
| ENSG00000110851 |            | 0.42121212 |            | 0.421212121 |             |           | 0.4186047 |
| ENSG00000116489 | 0.1497006  | 0.27743902 | 0.1497006  | 0.277439024 |             |           | 0.1976744 |
| ENSG00000205653 |            | 0.2030303  |            | 0.203030303 |             |           | 0.4418605 |
| ENSG00000085063 |            | 0.36363636 |            | 0.363636364 |             |           | 0.4647059 |
| ENSG00000243543 |            |            |            |             |             |           | 0.1569767 |
| ENSG00000204922 | 0.46407186 | 0.27777778 | 0.46407186 | 0.277777778 | 0.071428571 | 0.0581395 | 0.0681818 |
| ENSG00000146285 | 0.25287356 | 0.46666667 | 0.25287356 | 0.466666667 | 0.30952381  | 0.255814  | 0.494186  |

|                 |            |            |            |             |             |           |           |
|-----------------|------------|------------|------------|-------------|-------------|-----------|-----------|
| ENSG00000164591 |            |            |            |             |             | 0.122093  |           |
| ENSG00000167881 |            | 0.2969697  |            | 0.296969697 |             |           | 0.4647059 |
| ENSG00000102265 |            | 0.48484848 |            | 0.484848485 |             |           | 0.4659091 |
| ENSG00000113108 | 0.49444444 | 0.25757576 | 0.49444444 | 0.257575758 | 0.133333333 | 0.1704545 | 0.2209302 |
| ENSG00000170946 |            | 0.33030303 |            | 0.33030303  |             |           | 0.3488372 |
| ENSG00000060709 | 0.47005988 | 0.36666667 | 0.47005988 | 0.366666667 | 0.391566265 | 0.4302326 | 0.4476744 |
| ENSG00000175106 |            | 0.21165644 |            | 0.211656442 |             |           | 0.1647059 |
| ENSG00000127074 |            |            |            |             | 0.446428571 | 0.3869048 |           |
| ENSG00000105393 |            | 0.20625    |            | 0.20625     |             |           |           |
| ENSG00000104490 | 0.48802395 | 0.27878788 | 0.48802395 | 0.278787879 | 0.458333333 | 0.4534884 | 0.244186  |
| ENSG00000120075 |            | 0.36060606 |            | 0.360606061 |             |           | 0.3953488 |
| ENSG00000198691 |            |            |            |             |             |           | 0.0755814 |
| ENSG00000170099 |            | 0.46666667 |            | 0.466666667 |             |           | 0.1294118 |
| ENSG00000075239 |            | 0.45151515 |            | 0.451515152 |             |           | 0.1162791 |
| ENSG00000020922 | 0.33832335 |            | 0.33832335 |             | 0.482142857 | 0.3837209 |           |
| ENSG00000131355 |            | 0.06969697 |            | 0.06969697  |             |           |           |
| ENSG00000090920 |            | 0.21036585 |            | 0.210365854 |             |           | 0.2267442 |
| ENSG00000163817 |            | 0.42378049 |            | 0.423780488 |             |           | 0.2117647 |
| ENSG00000258223 | 0.45625    | 0.06097561 | 0.45625    | 0.06097561  | 0.202380952 | 0.1184211 | 0.1294118 |
| ENSG00000129667 |            | 0.3        |            | 0.3         |             |           | 0.372093  |
| ENSG00000238045 | 0.18263473 |            | 0.18263473 |             |             |           |           |
| ENSG00000159556 | 0.25149701 | 0.30606061 | 0.25149701 | 0.306060606 |             |           | 0.3837209 |
| ENSG00000175265 |            | 0.22727273 |            | 0.227272727 |             |           | 0.1931818 |
| ENSG00000203963 |            | 0.39444444 |            | 0.394444444 |             |           | 0.1704545 |
| ENSG00000164674 |            |            |            |             | 0.053571429 | 0.0581395 |           |
| ENSG00000140044 | 0.41017964 | 0.42424242 | 0.41017964 | 0.424242424 |             |           | 0.4244186 |
| ENSG00000119283 |            | 0.33333333 |            | 0.333333333 |             |           | 0.4886364 |
| ENSG00000123358 |            | 0.0969697  |            | 0.096969697 |             |           | 0.1235294 |
| ENSG00000130612 | 0.33030303 | 0.1030303  | 0.33030303 | 0.103030303 | 0.452380952 | 0.4418605 | 0.25      |
| ENSG00000008226 |            | 0.1        |            | 0.1         |             |           |           |
| ENSG00000119689 |            |            |            |             |             |           | 0.4117647 |
| ENSG00000146834 | 0.13473054 | 0.16969697 | 0.13473054 | 0.16969697  |             |           |           |
| ENSG00000100281 | 0.08383234 | 0.3597561  | 0.08383234 | 0.359756098 | 0.5         | 0.4476744 | 0.4583333 |
| ENSG00000137094 | 0.125      | 0.49393939 | 0.125      | 0.493939394 | 0.291666667 | 0.4127907 | 0.4058824 |
| ENSG00000196263 |            | 0.44848485 |            | 0.448484848 |             |           | 0.4127907 |
| ENSG00000120149 |            | 0.17177914 |            | 0.171779141 |             |           |           |
| ENSG00000165895 |            | 0.28658537 |            | 0.286585366 |             |           |           |
| ENSG00000144455 |            | 0.48181818 |            | 0.481818182 |             |           | 0.4555556 |
| ENSG00000162722 |            | 0.40555556 |            | 0.405555556 |             |           | 0.375     |
| ENSG00000259458 | 0.39520958 | 0.44848485 | 0.39520958 | 0.448484848 | 0.172619048 | 0.25      | 0.2965116 |
| ENSG00000010292 | 0.40804598 | 0.5        | 0.40804598 | 0.5         | 0.133333333 | 0.2613636 | 0.4767442 |
| ENSG00000138131 |            | 0.34545455 |            | 0.345454545 |             |           | 0.4825581 |
| ENSG00000158793 |            | 0.1        |            | 0.1         |             |           | 0.0755814 |
| ENSG00000144741 | 0.37125749 | 0.47575758 | 0.37125749 | 0.475757576 | 0.476190476 | 0.4825581 | 0.3333333 |
| ENSG00000096401 | 0.48203593 | 0.05       | 0.48203593 | 0.05        | 0.422619048 | 0.4593023 |           |
| ENSG00000108021 |            |            |            |             | 0.053571429 | 0.0697674 |           |
| ENSG00000106331 | 0.26966292 | 0.20909091 | 0.26966292 | 0.209090909 | 0.375       | 0.3409091 | 0.3430233 |
| ENSG00000111237 |            | 0.33742331 |            | 0.337423313 |             |           | 0.1104651 |
| ENSG00000106484 |            | 0.2        |            | 0.2         |             |           | 0.2383721 |
| ENSG00000174015 | 0.2        |            | 0.2        |             |             |           |           |
| ENSG00000137675 |            |            |            |             | 0.101190476 | 0.1084337 |           |
| ENSG00000168785 | 0.09195402 |            | 0.09195402 |             |             |           |           |
| ENSG00000122691 |            | 0.11931818 |            | 0.119318182 |             |           | 0.4880952 |
| ENSG00000163531 |            | 0.43333333 |            | 0.433333333 |             |           | 0.244186  |

|                 |            |            |            |             |             |           |           |
|-----------------|------------|------------|------------|-------------|-------------|-----------|-----------|
| ENSG00000127980 |            |            |            |             | 0.077777778 |           |           |
| ENSG00000101928 |            | 0.40606061 |            | 0.406060606 |             |           | 0.4352941 |
| ENSG00000163694 | 0.4186747  | 0.36363636 | 0.4186747  | 0.363636364 | 0.470238095 | 0.5       | 0.494186  |
| ENSG00000135119 |            | 0.12804878 |            | 0.12804878  |             |           | 0.4176471 |
| ENSG00000131747 |            | 0.27272727 |            | 0.272727273 |             |           |           |
| ENSG00000130529 |            |            |            |             | 0.081395349 |           |           |
| ENSG00000135316 |            |            |            |             |             |           | 0.0909091 |
| ENSG00000168575 |            |            |            |             |             |           | 0.0813953 |
| ENSG00000179133 |            | 0.27564103 |            | 0.275641026 |             |           | 0.4011628 |
| ENSG00000134815 | 0.35555556 | 0.07575758 | 0.35555556 | 0.075757576 | 0.422222222 | 0.4886364 |           |
| ENSG00000151929 |            | 0.40606061 |            | 0.406060606 |             |           | 0.3255814 |
| ENSG00000025293 | 0.08888889 | 0.17272727 | 0.08888889 | 0.172727273 |             |           | 0.1453488 |
| ENSG00000134077 | 0.5        | 0.46363636 | 0.5        | 0.463636364 | 0.446428571 | 0.4244186 | 0.4593023 |
| ENSG00000143107 | 0.44011976 |            | 0.44011976 |             | 0.06547619  | 0.2093023 |           |
| ENSG00000090316 | 0.23333333 |            | 0.23333333 |             | 0.111111111 | 0.1666667 |           |
| ENSG00000093100 |            | 0.40606061 |            | 0.406060606 |             |           | 0.4593023 |
| ENSG00000163374 | 0.27777778 | 0.31818182 | 0.27777778 | 0.318181818 | 0.355555556 | 0.1777778 | 0.2616279 |
| ENSG00000163827 |            | 0.43251534 |            | 0.432515337 |             |           | 0.4651163 |
| ENSG00000185163 |            | 0.13333333 |            | 0.133333333 |             |           | 0.2093023 |
| ENSG00000072071 |            | 0.10606061 |            | 0.106060606 |             |           | 0.0813953 |
| ENSG00000242028 | 0.32335329 | 0.07222222 | 0.32335329 | 0.072222222 | 0.321428571 | 0.244186  | 0.244186  |
| ENSG00000188676 |            | 0.46319018 |            | 0.463190184 |             |           | 0.3235294 |
| ENSG00000007350 | 0.26829268 | 0.22121212 | 0.26829268 | 0.221212121 |             |           | 0.2732558 |
| ENSG00000116679 |            | 0.46969697 |            | 0.46969697  |             |           | 0.3488372 |
| ENSG00000187094 | 0.32934132 |            | 0.32934132 |             | 0.25        | 0.2965116 | 0.0872093 |
| ENSG00000160505 | 0.48493976 | 0.10060976 | 0.48493976 | 0.100609756 | 0.5         | 0.4883721 | 0.2093023 |
| ENSG00000185630 |            | 0.3        |            | 0.3         |             |           | 0.2111111 |
| ENSG00000186143 | 0.43413174 | 0.48333333 | 0.43413174 | 0.483333333 | 0.261904762 | 0.1744186 | 0.2840909 |
| ENSG00000171681 | 0.26946108 |            | 0.26946108 |             | 0.415662651 | 0.3928571 |           |
| ENSG00000103528 |            | 0.49390244 |            | 0.493902439 |             |           |           |
| ENSG00000172901 | 0.37356322 | 0.5        | 0.37356322 | 0.5         | 0.446428571 | 0.4127907 | 0.2732558 |
| ENSG00000133317 | 0.28614458 | 0.13690476 | 0.28614458 | 0.136904762 | 0.373493976 | 0.3488372 | 0.0930233 |
| ENSG00000134375 |            | 0.47239264 |            | 0.472392638 |             |           | 0.4294118 |
| ENSG00000214946 |            | 0.22222222 |            | 0.222222222 |             |           | 0.4127907 |
| ENSG00000115457 |            | 0.05555556 |            | 0.055555556 |             |           |           |
| ENSG00000049249 |            |            |            |             |             |           | 0.4651163 |
| ENSG00000169925 | 0.19760479 | 0.29444444 | 0.19760479 | 0.294444444 | 0.274390244 | 0.4127907 | 0.4204545 |
| ENSG00000146587 |            | 0.48181818 |            | 0.481818182 |             |           | 0.3823529 |
| ENSG00000144233 | 0.11666667 | 0.47575758 | 0.11666667 | 0.475757576 | 0.433333333 | 0.2954545 | 0.3953488 |
| ENSG00000004777 | 0.42168675 |            | 0.42168675 |             | 0.255952381 | 0.2209302 |           |
| ENSG00000111644 |            | 0.19090909 |            | 0.190909091 |             |           | 0.3604651 |
| ENSG00000136935 |            | 0.44444444 |            | 0.444444444 |             |           | 0.4090909 |
| ENSG00000253305 |            | 0.20224719 |            | 0.202247191 |             |           | 0.1477273 |
| ENSG00000224470 |            | 0.34269663 |            | 0.342696629 |             |           | 0.3863636 |
| ENSG00000246366 |            | 0.0969697  |            | 0.096969697 |             |           |           |
| ENSG00000126267 | 0.11377246 |            | 0.11377246 |             | 0.136904762 | 0.1453488 |           |
| ENSG00000145431 |            | 0.33850932 |            | 0.338509317 | 0.089285714 | 0.127907  | 0.3414634 |
| ENSG00000110092 |            | 0.48170732 |            | 0.481707317 |             |           | 0.4709302 |
| ENSG00000163072 | 0.46385542 | 0.42727273 | 0.46385542 | 0.427272727 | 0.30952381  | 0.3604651 | 0.4011628 |
| ENSG00000104331 |            | 0.13529412 |            | 0.135294118 | 0.311111111 | 0.2272727 | 0.3571429 |
| ENSG00000120899 | 0.36111111 | 0.48181818 | 0.36111111 | 0.481818182 | 0.3         | 0.3662791 | 0.4883721 |
| ENSG00000124313 |            | 0.08641975 |            | 0.086419753 |             |           |           |
| ENSG00000106304 |            | 0.26969697 |            | 0.26969697  |             |           | 0.0581395 |
| ENSG00000255482 | 0.22155689 |            | 0.22155689 |             | 0.36746988  | 0.3023256 |           |

|                 |            |            |            |             |             |           |           |
|-----------------|------------|------------|------------|-------------|-------------|-----------|-----------|
| ENSG00000123569 |            |            |            | 0.446428571 |             | 0.3662791 |           |
| ENSG00000198844 |            | 0.35151515 |            | 0.351515152 |             |           | 0.4593023 |
| ENSG00000166455 | 0.43081761 | 0.12121212 | 0.43081761 | 0.121212121 | 0.273809524 | 0.2965116 | 0.3023256 |
| ENSG00000204173 | 0.23888889 | 0.31111111 | 0.23888889 | 0.311111111 | 0.466666667 | 0.3977273 | 0.3977273 |
| ENSG00000163945 | 0.21590909 | 0.34444444 | 0.21590909 | 0.344444444 | 0.438271605 | 0.4825581 | 0.4593023 |
| ENSG00000137404 |            |            |            |             |             |           | 0.1744186 |
| ENSG00000103351 |            |            |            | 0.155555556 |             | 0.0909091 |           |
| ENSG00000081177 | 0.27777778 | 0.38181818 | 0.27777778 | 0.381818182 |             |           | 0.0581395 |
| ENSG00000080802 |            | 0.36666667 |            | 0.366666667 |             | 0.0666667 | 0.4534884 |
| ENSG00000118276 |            | 0.47272727 |            | 0.472727273 |             |           | 0.3705882 |
| ENSG00000179979 | 0.10179641 |            | 0.10179641 |             | 0.3         | 0.3662791 |           |
| ENSG00000115665 |            | 0.42121212 |            | 0.421212121 | 0.174698795 | 0.1411765 | 0.244186  |
| ENSG00000163346 |            | 0.41818182 |            | 0.418181818 |             |           | 0.0588235 |
| ENSG00000175073 |            |            |            |             |             |           | 0.0581395 |
| ENSG00000109927 |            | 0.3        |            | 0.3         |             |           | 0.3313953 |
| ENSG00000118420 |            | 0.26993865 |            | 0.26993865  |             |           | 0.1918605 |
| ENSG00000102802 |            | 0.15151515 |            | 0.151515152 |             |           | 0.3313953 |
| ENSG00000224130 |            | 0.1746988  |            | 0.174698795 |             |           | 0.2073171 |
| ENSG00000144354 |            | 0.28484848 |            | 0.284848485 |             |           | 0.3313953 |
| ENSG00000147655 | 0.28888889 | 0.23030303 | 0.28888889 | 0.23030303  | 0.055555556 |           | 0.1607143 |
| ENSG00000138759 |            | 0.41111111 |            | 0.411111111 |             |           | 0.4875    |
| ENSG00000186350 | 0.32222222 |            | 0.32222222 |             | 0.2         | 0.2444444 |           |
| ENSG00000181472 |            |            |            |             |             |           | 0.1777778 |
| ENSG00000250685 | 0.39444444 |            | 0.39444444 |             | 0.422222222 | 0.4767442 |           |
| ENSG00000143748 | 0.49101796 |            | 0.49101796 |             | 0.111111111 | 0.0697674 |           |
| ENSG00000161551 | 0.35928144 | 0.41158537 | 0.35928144 | 0.411585366 | 0.31547619  | 0.3333333 | 0.2588235 |
| ENSG00000169327 | 0.35928144 |            | 0.35928144 |             | 0.379518072 | 0.4825581 |           |
| ENSG00000157429 |            | 0.26111111 |            | 0.261111111 |             |           | 0.1111111 |
| ENSG00000172889 |            | 0.22222222 |            | 0.222222222 | 0.220238095 | 0.244186  | 0.125     |
| ENSG00000164683 |            | 0.30606061 |            | 0.306060606 |             |           | 0.25      |
| ENSG00000180104 |            | 0.39570552 |            | 0.395705521 |             |           | 0.4117647 |
| ENSG00000144834 | 0.4845679  | 0.23030303 | 0.4845679  | 0.23030303  | 0.457831325 | 0.4186047 | 0.3837209 |
| ENSG00000134709 |            | 0.16111111 |            | 0.161111111 |             |           | 0.2045455 |
| ENSG00000156232 | 0.39520958 |            | 0.39520958 |             | 0.228915663 | 0.2790698 |           |
| ENSG00000117407 | 0.17987805 |            | 0.17987805 |             |             |           |           |
| ENSG00000101109 |            | 0.46666667 |            | 0.466666667 |             |           | 0.2857143 |
| ENSG00000041988 |            | 0.34756098 |            | 0.347560976 |             |           | 0.4360465 |
| ENSG00000166845 |            | 0.32424242 |            | 0.324242424 |             |           | 0.2954545 |
| ENSG00000063660 |            | 0.36111111 |            | 0.361111111 |             |           | 0.3604651 |
| ENSG00000176896 | 0.05747126 | 0.45454545 | 0.05747126 | 0.454545455 |             |           | 0.3837209 |
| ENSG00000136444 | 0.07647059 | 0.22121212 | 0.07647059 | 0.221212121 | 0.204545455 | 0.1222222 | 0.0639535 |
| ENSG00000096968 | 0.10240964 |            | 0.10240964 |             | 0.457317073 | 0.3837209 |           |
| ENSG00000085644 |            | 0.43604651 |            | 0.436046512 |             |           | 0.1744186 |
| ENSG00000153933 |            | 0.31132075 |            | 0.311320755 |             |           | 0.1585366 |
| ENSG00000196391 | 0.4760479  | 0.43333333 | 0.4760479  | 0.433333333 | 0.345238095 | 0.3488372 | 0.4825581 |
| ENSG00000116183 | 0.11377246 | 0.47852761 | 0.11377246 | 0.478527607 |             | 0.0581395 | 0.3863636 |
| ENSG00000100478 | 0.14071856 |            | 0.14071856 |             | 0.470238095 | 0.372093  |           |
| ENSG00000042304 |            | 0.38235294 |            | 0.382352941 |             |           | 0.4886364 |
| ENSG00000188211 |            | 0.42424242 |            | 0.424242424 |             |           | 0.5       |
| ENSG00000131620 | 0.27844311 |            | 0.27844311 |             |             |           |           |
| ENSG00000162521 |            |            |            |             | 0.127906977 | 0.1136364 |           |
| ENSG00000134569 |            |            |            |             |             |           | 0.0930233 |
| ENSG00000164284 |            | 0.47878788 |            | 0.478787879 |             |           | 0.377907  |
| ENSG00000183049 |            | 0.47878788 |            | 0.478787879 |             |           | 0.4588235 |

|                 |            |            |            |             |             |           |           |
|-----------------|------------|------------|------------|-------------|-------------|-----------|-----------|
| ENSG00000164128 |            | 0.25757576 |            | 0.257575758 |             |           | 0.4883721 |
| ENSG00000161973 | 0.45808383 | 0.3        | 0.45808383 | 0.3         | 0.482142857 | 0.4360465 | 0.4360465 |
| ENSG00000140526 |            | 0.46551724 |            | 0.465517241 |             |           | 0.2674419 |
| ENSG00000105662 |            | 0.38636364 |            | 0.386363636 |             |           | 0.1477273 |
| ENSG00000109193 | 0.28963415 | 0.16666667 | 0.28963415 | 0.166666667 | 0.243902439 | 0.3058824 |           |
| ENSG00000112115 |            | 0.21111111 |            | 0.211111111 |             |           | 0.1569767 |
| ENSG00000185532 |            | 0.30909091 |            | 0.309090909 |             |           | 0.2965116 |
| ENSG00000075223 | 0.05555556 | 0.11585366 | 0.05555556 | 0.115853659 |             | 0.0888889 | 0.0705882 |
| ENSG00000129351 |            | 0.36666667 |            | 0.366666667 |             |           | 0.3488372 |
| ENSG00000174111 |            |            |            |             |             |           | 0.0755814 |
| ENSG00000186204 | 0.21646341 | 0.4969697  | 0.21646341 | 0.496969697 |             |           | 0.2823529 |
| ENSG00000184108 | 0.30606061 |            | 0.30606061 |             | 0.386904762 | 0.3139535 |           |
| ENSG00000198673 | 0.32222222 | 0.4969697  | 0.32222222 | 0.496969697 | 0.1         | 0.1444444 | 0.3647059 |
| ENSG00000176101 |            | 0.28787879 |            | 0.287878788 |             |           |           |
| ENSG00000078177 |            | 0.42592593 |            | 0.425925926 |             |           | 0.5       |
| ENSG00000172154 | 0.10479042 |            | 0.10479042 |             |             |           |           |
| ENSG00000183853 |            | 0.43636364 |            | 0.436363636 |             |           | 0.4476744 |
| ENSG00000145592 |            | 0.43636364 |            | 0.436363636 |             |           | 0.4593023 |
| ENSG00000125675 |            | 0.06666667 |            | 0.066666667 |             |           |           |
| ENSG00000175573 |            |            |            |             |             |           | 0.0581395 |
| ENSG00000236338 |            | 0.08181818 |            | 0.081818182 |             |           | 0.0988372 |
| ENSG00000165061 |            | 0.19631902 |            | 0.196319018 |             |           |           |
| ENSG00000188282 | 0.49101796 | 0.12121212 | 0.49101796 | 0.121212121 | 0.404761905 | 0.372093  | 0.1395349 |
| ENSG00000066379 | 0.32222222 | 0.10606061 | 0.32222222 | 0.106060606 | 0.155555556 | 0.2272727 | 0.2093023 |
| ENSG00000218416 |            | 0.35454545 |            | 0.354545455 |             |           | 0.1136364 |
| ENSG00000189043 |            |            |            |             |             |           | 0.1555556 |
| ENSG00000142188 |            | 0.49079755 |            | 0.490797546 |             |           | 0.4878049 |
| ENSG00000185215 | 0.34444444 | 0.48888889 | 0.34444444 | 0.488888889 | 0.477777778 | 0.4545455 | 0.4545455 |
| ENSG00000184349 |            | 0.39393939 |            | 0.393939394 |             |           | 0.4418605 |
| ENSG00000243137 |            | 0.228125   |            | 0.228125    |             |           | 0.4695122 |
| ENSG00000066855 | 0.07784431 |            | 0.07784431 |             |             |           |           |
| ENSG00000167889 |            | 0.33231707 |            | 0.332317073 |             |           | 0.4244186 |
| ENSG00000183291 | 0.44610778 | 0.23939394 | 0.44610778 | 0.239393939 | 0.054216867 |           |           |
| ENSG00000009844 |            | 0.5        |            | 0.5         |             |           | 0.1555556 |
| ENSG00000104432 |            |            |            |             |             |           | 0.2111111 |
| ENSG00000140795 | 0.0969697  |            | 0.0969697  |             | 0.361445783 | 0.4345238 |           |
| ENSG00000034533 | 0.16566265 |            | 0.16566265 |             | 0.095238095 | 0.1       |           |
| ENSG00000013563 | 0.17964072 | 0.05882353 | 0.17964072 | 0.058823529 | 0.05952381  | 0.1162791 | 0.1477273 |
| ENSG00000136158 |            | 0.33333333 |            | 0.333333333 | 0.066666667 |           | 0.3604651 |
| ENSG00000171497 | 0.31111111 | 0.3125     | 0.31111111 | 0.3125      | 0.066666667 | 0.1976744 | 0.2235294 |
| ENSG00000166262 | 0.32634731 | 0.42121212 | 0.32634731 | 0.421212121 |             |           | 0.2674419 |
| ENSG00000159433 |            | 0.21515152 |            | 0.215151515 |             |           | 0.2674419 |
| ENSG00000034693 |            | 0.17987805 |            | 0.179878049 |             |           | 0.1941176 |
| ENSG00000032389 |            | 0.40606061 |            | 0.406060606 |             |           | 0.4651163 |
| ENSG00000206129 | 0.24157303 | 0.45705521 | 0.24157303 | 0.457055215 | 0.144444444 | 0.1569767 | 0.4880952 |
| ENSG00000118308 | 0.21111111 | 0.22865854 | 0.21111111 | 0.228658537 | 0.272727273 | 0.3111111 | 0.0581395 |
| ENSG00000130957 |            | 0.45679012 |            | 0.456790123 |             |           | 0.2616279 |
| ENSG00000147604 | 0.12777778 | 0.12424242 | 0.12777778 | 0.124242424 | 0.277777778 | 0.2159091 | 0.0639535 |
| ENSG00000128383 | 0.08888889 |            | 0.08888889 |             |             |           |           |
| ENSG00000130300 | 0.47305389 |            | 0.47305389 |             | 0.125       | 0.2151163 | 0.1428571 |
| ENSG00000204414 |            | 0.41477273 |            | 0.414772727 |             |           |           |
| ENSG00000100767 |            | 0.28181818 |            | 0.281818182 |             |           | 0.1117647 |
| ENSG00000111254 |            |            |            |             | 0.333333333 | 0.3409091 |           |
| ENSG00000115008 |            | 0.26363636 |            | 0.263636364 |             |           | 0.127907  |

|                 |            |            |            |             |             |           |           |
|-----------------|------------|------------|------------|-------------|-------------|-----------|-----------|
| ENSG00000103245 | 0.46107784 | 0.20909091 | 0.46107784 | 0.209090909 | 0.196428571 | 0.2470588 | 0.2529412 |
| ENSG00000123427 | 0.10493827 | 0.36666667 | 0.10493827 | 0.366666667 | 0.380952381 | 0.375     | 0.2840909 |
| ENSG00000125352 | 0.16768293 |            | 0.16768293 |             | 0.178571429 | 0.125     |           |
| ENSG00000147536 |            | 0.21515152 |            | 0.215151515 |             |           | 0.2906977 |
| ENSG00000165169 |            | 0.12222222 |            | 0.122222222 |             |           |           |
| ENSG00000198771 |            | 0.25925926 |            | 0.259259259 | 0.154761905 | 0.2790698 | 0.3472222 |
| ENSG00000173578 | 0.18263473 | 0.37272727 | 0.18263473 | 0.372727273 | 0.398809524 | 0.4069767 | 0.4069767 |
| ENSG00000070087 | 0.13953488 |            | 0.13953488 |             |             |           |           |
| ENSG00000138336 | 0.33030303 |            | 0.33030303 |             | 0.457831325 | 0.4069767 |           |
| ENSG00000118495 | 0.28742515 | 0.39506173 | 0.28742515 | 0.395061728 | 0.43452381  | 0.474359  | 0.2380952 |
| ENSG00000034053 |            | 0.2202381  |            | 0.220238095 | 0.297619048 | 0.2738095 | 0.375     |
| ENSG00000249773 | 0.49438202 |            | 0.49438202 |             | 0.477777778 | 0.4318182 |           |
| ENSG00000163293 |            | 0.37222222 |            | 0.372222222 |             |           | 0.4127907 |
| ENSG00000122642 |            | 0.40625    |            | 0.40625     |             |           | 0.1818182 |
| ENSG00000072121 |            | 0.4030303  |            | 0.403030303 |             |           | 0.3953488 |
| ENSG00000197077 | 0.11676647 | 0.49390244 | 0.11676647 | 0.493902439 | 0.107142857 | 0.122093  | 0.4709302 |
| ENSG00000058404 |            | 0.45       |            | 0.45        |             |           | 0.4090909 |
| ENSG00000159111 |            | 0.35454545 |            | 0.354545455 |             |           | 0.3662791 |
| ENSG00000176020 | 0.28012048 | 0.23006135 | 0.28012048 | 0.23006135  | 0.154761905 | 0.2383721 |           |
| ENSG00000158526 |            |            |            |             |             |           | 0.1058824 |
| ENSG00000167074 |            | 0.26829268 |            | 0.268292683 |             |           | 0.3255814 |
| ENSG00000008952 |            | 0.21666667 |            | 0.216666667 |             |           | 0.2906977 |
| ENSG00000143839 | 0.3253012  |            | 0.3253012  |             | 0.06547619  |           |           |
| ENSG00000164167 | 0.20658683 | 0.36206897 | 0.20658683 | 0.362068966 | 0.066666667 | 0.0988372 | 0.0795455 |
| ENSG00000168874 |            | 0.36046512 |            | 0.360465116 |             |           | 0.1395349 |
| ENSG00000171860 |            | 0.3        |            | 0.3         |             |           | 0.1337209 |
| ENSG00000167105 |            | 0.5        |            | 0.5         |             |           | 0.4036145 |
| ENSG00000142512 | 0.1746988  |            | 0.1746988  |             | 0.092592593 | 0.0609756 |           |
| ENSG00000165171 |            | 0.17948718 |            | 0.179487179 |             |           | 0.4342105 |
| ENSG00000167535 |            | 0.42987805 |            | 0.429878049 |             |           | 0.3571429 |
| ENSG00000116985 | 0.16111111 | 0.29444444 | 0.16111111 | 0.294444444 |             |           | 0.1931818 |
| ENSG00000185482 |            | 0.28181818 |            | 0.281818182 |             |           | 0.2267442 |
| ENSG00000150867 |            | 0.3969697  |            | 0.396969697 |             |           | 0.3546512 |
| ENSG00000182600 | 0.19461078 |            | 0.19461078 |             | 0.162650602 | 0.1686047 |           |
| ENSG00000067842 |            | 0.05625    |            | 0.05625     |             |           | 0.2235294 |
| ENSG00000127022 | 0.15568862 | 0.31515152 | 0.15568862 | 0.315151515 | 0.416666667 | 0.4476744 | 0.2882353 |
| ENSG00000125741 |            | 0.4        |            | 0.4         |             |           | 0.1976744 |
| ENSG00000186815 | 0.1875     | 0.1954023  | 0.1875     | 0.195402299 | 0.233333333 | 0.2840909 | 0.255814  |
| ENSG00000198231 |            | 0.3908046  |            | 0.390804598 |             |           | 0.4545455 |
| ENSG00000103363 |            | 0.4875     |            | 0.4875      |             |           | 0.3072289 |
| ENSG00000197093 |            | 0.43636364 |            | 0.436363636 |             |           | 0.372093  |
| ENSG00000130935 |            |            |            |             | 0.222222222 | 0.3977273 |           |
| ENSG00000075340 |            | 0.44848485 |            | 0.448484848 |             |           | 0.3555556 |
| ENSG00000152953 |            | 0.12424242 |            | 0.124242424 |             |           | 0.4529412 |
| ENSG00000137720 | 0.07784431 | 0.32121212 | 0.07784431 | 0.321212121 |             |           | 0.1976744 |
| ENSG00000112038 | 0.14371257 | 0.36890244 | 0.14371257 | 0.368902439 | 0.136904762 | 0.0523256 | 0.1022727 |
| ENSG00000124507 |            | 0.11818182 |            | 0.118181818 |             |           | 0.2906977 |
| ENSG00000104881 |            | 0.15123457 |            | 0.151234568 |             |           | 0.4534884 |
| ENSG00000130307 |            | 0.40909091 |            | 0.409090909 |             |           | 0.25      |
| ENSG00000164751 | 0.2994012  |            | 0.2994012  |             | 0.285714286 | 0.3470588 |           |
| ENSG00000145685 |            | 0.49390244 |            | 0.493902439 |             |           | 0.3023256 |
| ENSG00000198055 |            |            |            |             |             |           | 0.0892857 |
| ENSG00000184347 |            |            |            |             |             |           | 0.1882353 |
| ENSG00000122585 | 0.4        |            | 0.4        |             | 0.340909091 | 0.3333333 |           |



|                 |            |            |            |             |             |           |           |           |
|-----------------|------------|------------|------------|-------------|-------------|-----------|-----------|-----------|
| ENSG00000169347 |            | 0.08787879 |            | 0.087878788 |             |           |           | 0.1744186 |
| ENSG00000161328 |            | 0.37878788 |            | 0.378787879 |             |           |           | 0.2267442 |
| ENSG00000167118 |            | 0.13333333 |            | 0.133333333 |             |           |           | 0.0813953 |
| ENSG00000162779 | 0.28443114 | 0.08695652 | 0.28443114 | 0.086956522 | 0.327380952 | 0.4651163 |           | 0.3705882 |
| ENSG00000197363 |            | 0.14242424 |            | 0.142424242 |             |           |           | 0.4764706 |
| ENSG00000184571 | 0.46407186 |            | 0.46407186 |             | 0.43452381  |           | 0.4593023 |           |
| ENSG00000140284 |            | 0.1595092  |            | 0.159509202 |             |           |           |           |
| ENSG00000135622 |            | 0.12121212 |            | 0.121212121 |             |           |           | 0.1627907 |
| ENSG00000173137 |            | 0.4202454  |            | 0.420245399 |             |           |           | 0.3647059 |
| ENSG00000182508 |            | 0.08231707 |            | 0.082317073 |             |           |           |           |
| ENSG00000144021 |            | 0.33333333 |            | 0.333333333 |             |           |           | 0.3837209 |
| ENSG00000115548 |            | 0.16975309 |            | 0.169753086 |             |           |           |           |
| ENSG00000021300 | 0.38764045 | 0.10909091 | 0.38764045 | 0.109090909 | 0.1         | 0.1444444 |           | 0.1511628 |
| ENSG00000091409 |            | 0.36969697 |            | 0.36969697  |             |           |           | 0.0988372 |
| ENSG00000092051 |            |            |            |             | 0.244047619 |           | 0.2093023 |           |
| ENSG00000153113 | 0.11976048 | 0.42987805 | 0.11976048 | 0.429878049 | 0.267857143 | 0.2616279 |           | 0.2906977 |
| ENSG00000182253 | 0.4011976  | 0.28353659 | 0.4011976  | 0.283536585 | 0.238095238 | 0.3023256 |           | 0.4235294 |
| ENSG00000185774 |            | 0.41515152 |            | 0.415151515 | 0.178571429 | 0.1941176 |           | 0.3941176 |
| ENSG00000180347 | 0.16363636 | 0.28823529 | 0.16363636 | 0.288235294 | 0.415662651 | 0.3197674 |           | 0.1511628 |
| ENSG00000186951 |            | 0.19207317 |            | 0.192073171 |             |           |           |           |
| ENSG00000204010 |            |            |            |             | 0.095238095 |           | 0.2151163 |           |
| ENSG00000141098 |            | 0.14545455 |            | 0.145454545 |             |           |           | 0.0529412 |
| ENSG00000111424 | 0.18373494 | 0.44545455 | 0.18373494 | 0.445454545 | 0.404761905 | 0.3255814 |           | 0.3470588 |
| ENSG00000138439 |            | 0.41463415 |            | 0.414634146 |             |           |           | 0.3214286 |
| ENSG00000188937 |            |            |            |             | 0.470238095 |           | 0.4411765 |           |
| ENSG00000128886 |            | 0.06666667 |            | 0.066666667 |             |           |           | 0.255814  |
| ENSG00000120334 | 0.36227545 |            | 0.36227545 |             |             |           |           |           |
| ENSG00000147316 |            | 0.29444444 |            | 0.294444444 |             |           |           | 0.25      |
| ENSG00000160117 | 0.20555556 | 0.15757576 | 0.20555556 | 0.157575758 | 0.284090909 | 0.375     |           | 0.3197674 |
| ENSG00000103742 |            | 0.1030303  |            | 0.103030303 |             |           |           | 0.2209302 |
| ENSG00000167984 | 0.30182927 | 0.36503067 | 0.30182927 | 0.365030675 | 0.333333333 | 0.2888889 |           | 0.4825581 |
| ENSG00000134324 |            | 0.15151515 |            | 0.151515152 |             |           |           | 0.2674419 |
| ENSG00000157087 | 0.4251497  | 0.47878788 | 0.4251497  | 0.478787879 | 0.345238095 | 0.3546512 |           | 0.3197674 |
| ENSG00000183018 |            | 0.36111111 |            | 0.361111111 |             |           |           | 0.4772727 |
| ENSG00000138363 |            | 0.27222222 |            | 0.272222222 |             |           |           | 0.25      |
| ENSG00000120215 | 0.21666667 | 0.31176471 | 0.21666667 | 0.311764706 |             |           |           | 0.373494  |
| ENSG00000212710 |            | 0.33888889 |            | 0.338888889 |             |           |           | 0.4333333 |
| ENSG00000139718 |            | 0.22159091 |            | 0.221590909 |             |           |           |           |
| ENSG00000177182 |            |            |            |             |             |           |           | 0.3636364 |
| ENSG00000135218 | 0.30538922 | 0.43292683 | 0.30538922 | 0.432926829 | 0.377777778 | 0.2840909 |           | 0.377907  |
| ENSG00000120645 |            | 0.37272727 |            | 0.372727273 |             |           |           | 0.3411765 |
| ENSG00000159164 |            | 0.21212121 |            | 0.212121212 | 0.077380952 | 0.1046512 |           |           |
| ENSG00000164209 | 0.12352941 | 0.06741573 | 0.12352941 | 0.06741573  | 0.26744186  | 0.1842105 |           | 0.0795455 |
| ENSG00000074410 |            | 0.43597561 |            | 0.43597561  |             |           |           | 0.5       |
| ENSG00000060718 | 0.10240964 | 0.17272727 | 0.10240964 | 0.172727273 |             |           |           | 0.2267442 |
| ENSG00000164091 |            | 0.41212121 |            | 0.412121212 |             |           |           | 0.4767442 |
| ENSG00000182963 |            | 0.38484848 |            | 0.384848485 |             |           |           | 0.4534884 |
| ENSG00000181495 | 0.32335329 |            | 0.32335329 |             |             |           |           |           |
| ENSG00000173200 |            | 0.24242424 |            | 0.242424242 |             |           |           | 0.4825581 |
| ENSG00000168394 |            | 0.06969697 |            | 0.06969697  |             |           |           | 0.1337209 |
| ENSG00000153339 |            | 0.22727273 |            | 0.227272727 |             |           |           | 0.4476744 |
| ENSG00000106723 |            | 0.11666667 |            | 0.116666667 |             |           |           | 0.0681818 |
| ENSG00000099899 | 0.06287425 | 0.2030303  | 0.06287425 | 0.203030303 | 0.119047619 | 0.1395349 |           | 0.0909091 |
| ENSG00000115947 | 0.28143713 | 0.40243902 | 0.28143713 | 0.402439024 | 0.5         | 0.5       |           | 0.4       |

|                 |            |            |            |             |             |  |           |
|-----------------|------------|------------|------------|-------------|-------------|--|-----------|
| ENSG00000155903 |            | 0.35555556 |            | 0.35555556  |             |  | 0.3662791 |
| ENSG0000073711  | 0.48203593 |            | 0.48203593 |             | 0.19047619  |  | 0.2848837 |
| ENSG00000115194 |            |            |            |             |             |  | 0.0697674 |
| ENSG00000107282 |            | 0.23333333 |            | 0.23333333  |             |  | 0.4431818 |
| ENSG00000136695 |            | 0.5        |            | 0.5         |             |  | 0.3222222 |
| ENSG00000107614 | 0.4011976  | 0.48888889 | 0.4011976  | 0.48888889  | 0.267857143 |  | 0.3953488 |
| ENSG00000111341 |            | 0.35       |            | 0.35        |             |  | 0.1022727 |
| ENSG00000106328 | 0.20359281 | 0.1        | 0.20359281 | 0.1         | 0.107142857 |  | 0.0529412 |
| ENSG00000176971 | 0.18862275 | 0.14545455 | 0.18862275 | 0.14545455  | 0.077380952 |  | 0.1627907 |
| ENSG00000083896 |            | 0.45061728 |            | 0.45061728  |             |  | 0.2325581 |
| ENSG00000132530 | 0.23353293 |            | 0.23353293 |             | 0.416666667 |  | 0.4418605 |
| ENSG00000160062 |            | 0.09509202 |            | 0.095092025 |             |  | 0.2882353 |
| ENSG00000187650 |            | 0.49090909 |            | 0.490909091 |             |  | 0.3139535 |
| ENSG00000162510 |            | 0.46969697 |            | 0.46969697  |             |  | 0.2705882 |
| ENSG00000075826 |            | 0.32121212 |            | 0.321212121 |             |  | 0.4186047 |
| ENSG00000197584 |            | 0.3969697  |            | 0.396969697 |             |  | 0.3430233 |
| ENSG00000196456 |            | 0.44207317 |            | 0.442073171 |             |  | 0.2616279 |
| ENSG00000141294 | 0.0748503  |            | 0.0748503  |             |             |  | 0.3197674 |
| ENSG00000149089 | 0.27108434 |            | 0.27108434 |             | 0.255952381 |  | 0.0748503 |
| ENSG00000129680 |            | 0.36060606 |            | 0.360606061 |             |  | 0.3197674 |
| ENSG00000145817 | 0.41317365 | 0.25581395 | 0.41317365 | 0.255813953 |             |  | 0.3197674 |
| ENSG00000141646 |            | 0.36666667 |            | 0.366666667 |             |  | 0.0595238 |
| ENSG00000178445 |            | 0.34242424 |            | 0.342424242 |             |  | 0.402439  |
| ENSG00000145675 |            | 0.43902439 |            | 0.43902439  |             |  | 0.4593023 |
| ENSG00000165572 | 0.06111111 | 0.08484848 | 0.06111111 | 0.084848485 |             |  | 0.0523256 |
| ENSG00000221994 |            | 0.46319018 |            | 0.463190184 | 0.077380952 |  | 0.4186047 |
| ENSG00000070761 |            |            |            |             | 0.166666667 |  | 0.1104651 |
| ENSG00000010803 |            | 0.35534591 |            | 0.355345912 |             |  | 0.1511628 |
| ENSG00000110218 |            | 0.37575758 |            | 0.375757576 |             |  | 0.1058824 |
| ENSG00000140853 | 0.46407186 | 0.40372671 | 0.46407186 | 0.403726708 | 0.375       |  | 0.4659091 |
| ENSG00000006611 | 0.30113636 | 0.47878788 | 0.30113636 | 0.478787879 | 0.477272727 |  | 0.2738095 |
| ENSG00000259207 |            | 0.33333333 |            | 0.333333333 |             |  | 0.4352941 |
| ENSG00000138078 | 0.26347305 | 0.34242424 | 0.26347305 | 0.342424242 | 0.34939759  |  | 0.4186047 |
| ENSG00000196418 | 0.17964072 | 0.11818182 | 0.17964072 | 0.118181818 |             |  | 0.2613636 |
| ENSG00000186283 | 0.10179641 | 0.32926829 | 0.10179641 | 0.329268293 | 0.355555556 |  | 0.3882353 |
| ENSG00000152382 |            | 0.34146341 |            | 0.341463415 |             |  | 0.4069767 |
| ENSG00000157093 |            | 0.3969697  |            | 0.396969697 |             |  | 0.1117647 |
| ENSG00000164362 |            | 0.18012422 |            | 0.180124224 |             |  | 0.3863636 |
| ENSG00000135406 | 0.3742515  |            | 0.3742515  |             | 0.071428571 |  | 0.4011628 |
| ENSG00000105278 |            | 0.10909091 |            | 0.109090909 |             |  | 0.372093  |
| ENSG00000182957 | 0.43975904 | 0.38414634 | 0.43975904 | 0.384146341 | 0.416666667 |  | 0.3837209 |
| ENSG00000104888 |            | 0.27272727 |            | 0.272727273 |             |  | 0.3837209 |
| ENSG00000166924 |            | 0.33636364 |            | 0.336363636 |             |  | 0.3837209 |
| ENSG00000126337 | 0.14670659 | 0.2247191  | 0.14670659 | 0.224719101 |             |  | 0.3837209 |
| ENSG00000104951 | 0.17365269 |            | 0.17365269 |             | 0.345238095 |  | 0.3837209 |
| ENSG00000160094 |            | 0.40853659 |            | 0.408536585 |             |  | 0.3837209 |
| ENSG00000140798 | 0.17964072 | 0.2030303  | 0.17964072 | 0.203030303 |             |  | 0.3837209 |
| ENSG00000182916 |            |            |            |             | 0.477777778 |  | 0.3837209 |
| ENSG00000181092 |            | 0.37730061 |            | 0.377300613 |             |  | 0.3837209 |
| ENSG00000123983 | 0.30239521 | 0.40432099 | 0.30239521 | 0.404320988 | 0.244047619 |  | 0.3837209 |
| ENSG00000218537 | 0.21257485 | 0.11805556 | 0.21257485 | 0.118055556 | 0.482142857 |  | 0.3837209 |
| ENSG00000164902 | 0.32934132 |            | 0.32934132 |             | 0.327380952 |  | 0.3837209 |
| ENSG00000168792 |            | 0.36969697 |            | 0.36969697  |             |  | 0.3837209 |
| ENSG00000090263 |            | 0.21910112 |            | 0.219101124 |             |  | 0.3837209 |

|                 |            |            |            |             |             |           |           |
|-----------------|------------|------------|------------|-------------|-------------|-----------|-----------|
| ENSG00000103064 |            | 0.41818182 |            | 0.418181818 |             |           | 0.1802326 |
| ENSG00000198933 | 0.16467066 |            | 0.16467066 |             | 0.410714286 | 0.3546512 |           |
| ENSG00000171135 | 0.4        | 0.46969697 | 0.4        | 0.46969697  | 0.25        | 0.3       | 0.3604651 |
| ENSG00000169902 |            | 0.13636364 |            | 0.136363636 |             |           | 0.25      |
| ENSG00000155636 |            | 0.08787879 |            | 0.087878788 |             |           |           |
| ENSG00000138041 |            | 0.27272727 |            | 0.272727273 |             |           | 0.4709302 |
| ENSG00000073578 |            | 0.13483146 |            | 0.134831461 |             |           |           |
| ENSG00000125879 |            | 0.16969697 |            | 0.16969697  |             |           | 0.4666667 |
| ENSG00000164244 |            | 0.26162791 |            | 0.261627907 |             |           | 0.4825581 |
| ENSG00000139044 |            | 0.46666667 |            | 0.466666667 |             |           | 0.2732558 |
| ENSG00000165879 |            | 0.37878788 |            | 0.378787879 |             |           | 0.3470588 |
| ENSG00000081479 |            | 0.23030303 |            | 0.23030303  |             |           | 0.4767442 |
| ENSG00000163623 | 0.06111111 |            | 0.06111111 |             |             |           |           |
| ENSG00000168263 | 0.31818182 |            | 0.31818182 |             | 0.155555556 | 0.1363636 |           |
| ENSG00000242419 |            | 0.20224719 |            | 0.202247191 |             |           | 0.1477273 |
| ENSG00000101574 | 0.38023952 | 0.39393939 | 0.38023952 | 0.393939394 | 0.142857143 | 0.0872093 | 0.255814  |
| ENSG00000163659 | 0.07185629 |            | 0.07185629 |             |             |           |           |
| ENSG00000170786 | 0.23053892 |            | 0.23053892 |             | 0.101190476 |           |           |
| ENSG00000147121 |            | 0.42727273 |            | 0.427272727 |             |           | 0.0639535 |
| ENSG00000167378 |            | 0.43030303 |            | 0.43030303  |             |           | 0.4883721 |
| ENSG00000092140 | 0.06287425 | 0.30487805 | 0.06287425 | 0.304878049 | 0.31547619  | 0.2965116 | 0.3023256 |
| ENSG00000119703 | 0.48502994 | 0.09393939 | 0.48502994 | 0.093939394 | 0.178571429 | 0.1941176 |           |
| ENSG00000183486 | 0.43712575 |            | 0.43712575 |             | 0.386904762 | 0.4360465 |           |
| ENSG00000142197 |            | 0.2195122  |            | 0.219512195 |             |           |           |
| ENSG00000245869 | 0.19886364 |            | 0.19886364 |             | 0.466666667 | 0.4222222 |           |
| ENSG00000174938 | 0.5        | 0.32121212 | 0.5        | 0.321212121 | 0.420454545 | 0.244186  | 0.2034884 |
| ENSG00000185900 |            | 0.1196319  |            | 0.119631902 |             |           |           |
| ENSG00000240053 | 0.14670659 | 0.31212121 | 0.14670659 | 0.312121212 | 0.125       | 0.0697674 | 0.4534884 |
| ENSG00000108953 |            | 0.09444444 |            | 0.094444444 |             |           | 0.3409091 |
| ENSG00000183784 |            | 0.32222222 |            | 0.322222222 |             |           | 0.2727273 |
| ENSG00000168314 | 0.48125    | 0.22424242 | 0.48125    | 0.224242424 | 0.280487805 | 0.2555556 | 0.3058824 |
| ENSG00000213413 |            | 0.4375     |            | 0.4375      |             |           | 0.3170732 |
| ENSG00000072518 | 0.28443114 | 0.49393939 | 0.28443114 | 0.493939394 |             |           | 0.127907  |
| ENSG00000249884 | 0.2005988  |            | 0.2005988  |             |             | 0.0639535 |           |
| ENSG00000171466 |            | 0.20689655 |            | 0.206896552 |             |           |           |
| ENSG00000131096 | 0.48125    |            | 0.48125    |             | 0.273809524 | 0.3372093 |           |
| ENSG00000147099 | 0.24850299 | 0.09883721 | 0.24850299 | 0.098837209 | 0.238095238 | 0.3430233 | 0.4186047 |
| ENSG00000123737 |            | 0.34444444 |            | 0.344444444 |             |           | 0.2045455 |
| ENSG00000165650 |            | 0.2969697  |            | 0.296969697 |             |           |           |
| ENSG00000163207 | 0.26347305 | 0.0797546  | 0.26347305 | 0.079754601 | 0.404761905 | 0.377907  | 0.3902439 |
| ENSG00000044574 | 0.16766467 | 0.43030303 | 0.16766467 | 0.43030303  |             |           | 0.4058824 |
| ENSG00000122550 | 0.29341317 | 0.32822086 | 0.29341317 | 0.328220859 | 0.279761905 | 0.375     | 0.3372093 |
| ENSG00000048462 | 0.26946108 | 0.40588235 | 0.26946108 | 0.405882353 | 0.160714286 | 0.2209302 | 0.4459459 |
| ENSG00000131409 |            | 0.08484848 |            | 0.084848485 |             |           | 0.3953488 |
| ENSG00000004468 |            | 0.44242424 |            | 0.442424242 |             |           | 0.4069767 |
| ENSG00000067141 |            | 0.33707865 |            | 0.337078652 |             |           | 0.4111111 |
| ENSG00000253148 |            | 0.44848485 |            | 0.448484848 |             |           | 0.1860465 |
| ENSG00000180745 |            | 0.08536585 |            | 0.085365854 |             |           | 0.0930233 |
| ENSG00000099377 |            | 0.35454545 |            | 0.354545455 |             |           | 0.0988372 |
| ENSG00000160072 |            | 0.05151515 |            | 0.051515152 |             |           | 0.3604651 |
| ENSG00000073849 | 0.19277108 | 0.45757576 | 0.19277108 | 0.457575758 | 0.327380952 | 0.372093  | 0.4011628 |
| ENSG00000116704 |            | 0.29213483 |            | 0.292134831 |             |           | 0.1477273 |
| ENSG00000189325 | 0.23952096 |            | 0.23952096 |             | 0.25        | 0.2267442 |           |
| ENSG00000125107 | 0.13473054 |            | 0.13473054 |             |             |           |           |

|                 |            |            |            |             |             |           |           |
|-----------------|------------|------------|------------|-------------|-------------|-----------|-----------|
| ENSG00000203880 |            | 0.25454545 |            | 0.254545455 |             |           | 0.0581395 |
| ENSG00000214193 | 0.15868263 | 0.38787879 | 0.15868263 | 0.387878788 | 0.279761905 | 0.2093023 | 0.1104651 |
| ENSG00000136535 |            | 0.15757576 |            | 0.157575758 |             |           | 0.1686047 |
| ENSG00000184601 |            | 0.4054878  |            | 0.405487805 |             |           | 0.4235294 |
| ENSG00000164236 |            | 0.42121212 |            | 0.421212121 |             |           | 0.3529412 |
| ENSG00000166801 | 0.38023952 | 0.22121212 | 0.38023952 | 0.221212121 | 0.279761905 | 0.3662791 | 0.3176471 |
| ENSG00000132000 | 0.06111111 | 0.45454545 | 0.06111111 | 0.454545455 |             | 0.0568182 | 0.3255814 |
| ENSG00000165379 | 0.30681818 |            | 0.30681818 |             | 0.238636364 | 0.1818182 |           |
| ENSG00000119899 |            | 0.30555556 |            | 0.305555556 |             |           | 0.0941176 |
| ENSG00000163399 | 0.44011976 |            | 0.44011976 |             |             |           |           |
| ENSG00000102401 |            | 0.23006135 |            | 0.23006135  |             |           |           |
| ENSG00000170074 |            | 0.43888889 |            | 0.438888889 |             |           | 0.4545455 |
| ENSG00000048991 |            |            |            |             |             |           | 0.0755814 |
| ENSG00000174837 |            | 0.32317073 |            | 0.323170732 |             |           | 0.2797619 |
| ENSG00000215915 | 0.06886228 |            | 0.06886228 |             |             |           | 0.3662791 |
| ENSG00000197919 | 0.26111111 |            | 0.26111111 |             | 0.11627907  | 0.0909091 |           |
| ENSG00000178927 |            | 0.09393939 |            | 0.093939394 |             |           | 0.255814  |
| ENSG00000197566 |            | 0.10909091 |            | 0.109090909 |             |           | 0.2965116 |
| ENSG00000138380 |            | 0.05757576 |            | 0.057575758 |             |           | 0.0909091 |
| ENSG00000096696 |            | 0.3969697  |            | 0.396969697 |             |           | 0.1627907 |
| ENSG00000161791 |            | 0.12424242 |            | 0.124242424 |             |           | 0.0697674 |
| ENSG00000165669 |            | 0.34848485 |            | 0.348484848 |             |           | 0.1569767 |
| ENSG00000102317 | 0.20731707 | 0.43333333 | 0.20731707 | 0.433333333 | 0.392857143 | 0.4244186 | 0.4244186 |
| ENSG00000135333 |            | 0.49090909 |            | 0.490909091 |             |           | 0.3176471 |
| ENSG00000165966 |            | 0.31818182 |            | 0.318181818 |             |           | 0.2790698 |
| ENSG00000180509 | 0.08682635 | 0.45061728 | 0.08682635 | 0.450617284 | 0.404761905 | 0.4941176 | 0.4709302 |
| ENSG00000122859 |            | 0.05151515 |            | 0.051515152 |             |           | 0.0755814 |
| ENSG00000144306 |            | 0.303125   |            | 0.303125    |             |           | 0.2848837 |
| ENSG00000157005 |            | 0.05757576 |            | 0.057575758 |             |           | 0.0813953 |
| ENSG00000184178 |            | 0.25151515 |            | 0.251515152 | 0.226190476 | 0.2034884 | 0.3705882 |
| ENSG00000204287 | 0.34117647 | 0.3445122  | 0.34117647 | 0.344512195 | 0.488888889 | 0.3409091 | 0.4411765 |
| ENSG00000130348 | 0.11077844 | 0.46363636 | 0.11077844 | 0.463636364 |             | 0.0755814 | 0.1976744 |
| ENSG00000148950 | 0.35555556 |            | 0.35555556 |             | 0.222222222 | 0.3409091 |           |
| ENSG00000251322 |            | 0.16768293 |            | 0.167682927 |             |           | 0.2267442 |
| ENSG00000074966 |            | 0.2030303  |            | 0.203030303 |             |           | 0.25      |
| ENSG00000175728 |            | 0.05151515 |            | 0.051515152 |             |           |           |
| ENSG00000253633 |            | 0.1875     |            | 0.1875      |             |           | 0.4651163 |
| ENSG00000184608 | 0.46107784 | 0.43902439 | 0.46107784 | 0.43902439  | 0.363095238 | 0.3139535 | 0.3235294 |
| ENSG00000121594 |            | 0.21818182 |            | 0.218181818 |             |           | 0.2965116 |
| ENSG00000204104 |            | 0.29878049 |            | 0.298780488 |             |           | 0.325     |
| ENSG00000090776 |            | 0.10802469 |            | 0.108024691 |             |           |           |
| ENSG00000187079 |            | 0.33939394 |            | 0.339393939 |             |           | 0.4418605 |
| ENSG00000019144 | 0.49700599 | 0.49085366 | 0.49700599 | 0.490853659 | 0.297619048 | 0.2705882 | 0.494186  |
| ENSG00000075420 | 0.29775281 | 0.38787879 | 0.29775281 | 0.387878788 | 0.266666667 | 0.2613636 | 0.3313953 |
| ENSG00000141568 |            | 0.24545455 |            | 0.245454545 |             |           | 0.3977273 |
| ENSG00000184489 | 0.36526946 |            | 0.36526946 |             |             |           |           |
| ENSG00000154760 |            | 0.44444444 |            | 0.444444444 | 0.136904762 | 0.2151163 | 0.4883721 |
| ENSG00000181220 |            | 0.40555556 |            | 0.405555556 |             |           | 0.1918605 |
| ENSG00000133246 | 0.31609195 |            | 0.31609195 |             | 0.166666667 | 0.1511628 |           |
| ENSG00000112494 | 0.47289157 | 0.25       | 0.47289157 | 0.25        | 0.476190476 | 0.4709302 | 0.25      |
| ENSG00000052723 |            | 0.26363636 |            | 0.263636364 |             |           | 0.1104651 |
| ENSG00000180900 | 0.47878788 |            | 0.47878788 |             | 0.36746988  | 0.3823529 |           |
| ENSG00000169067 |            | 0.23888889 |            | 0.238888889 |             |           |           |
| ENSG00000147403 | 0.41916168 | 0.05882353 | 0.41916168 | 0.058823529 | 0.060240964 | 0.1162791 | 0.1477273 |

|                |            |            |            |             |             |           |           |
|----------------|------------|------------|------------|-------------|-------------|-----------|-----------|
| ENSG0000086475 | 0.33908046 |            | 0.33908046 |             | 0.22222222  | 0.2777778 | 0.1555556 |
| ENSG0000104447 | 0.45555556 | 0.44848485 | 0.45555556 | 0.448484848 | 0.130952381 | 0.2764706 | 0.3352941 |
| ENSG0000155849 | 0.10479042 | 0.22424242 | 0.10479042 | 0.224242424 | 0.232142857 | 0.1802326 | 0.1686047 |
| ENSG0000144848 |            | 0.28181818 |            | 0.281818182 |             |           | 0.3837209 |
| ENSG0000161638 |            |            |            |             |             |           | 0.0872093 |
| ENSG0000164176 |            | 0.37078652 |            | 0.370786517 |             |           | 0.3444444 |
| ENSG0000122008 |            | 0.20909091 |            | 0.209090909 | 0.482142857 | 0.494186  | 0.3837209 |
| ENSG0000189266 |            | 0.48181818 |            | 0.481818182 |             |           | 0.4593023 |
| ENSG0000171812 |            |            |            |             |             |           | 0.4767442 |
| ENSG0000010310 | 0.16666667 | 0.25304878 | 0.16666667 | 0.25304878  |             |           | 0.494186  |
| ENSG0000161920 |            | 0.20909091 |            | 0.209090909 |             |           | 0.2790698 |
| ENSG0000214855 | 0.5        |            | 0.5        |             | 0.311111111 | 0.3522727 |           |
| ENSG0000150938 |            | 0.33888889 |            | 0.338888889 |             |           | 0.4534884 |
| ENSG0000161016 | 0.11904762 |            | 0.11904762 |             | 0.06097561  | 0.0595238 |           |
| ENSG0000109332 |            | 0.4969697  |            | 0.496969697 | 0.465909091 | 0.4777778 | 0.4302326 |
| ENSG0000175970 |            | 0.45454545 |            | 0.454545455 |             |           | 0.4360465 |
| ENSG0000114933 |            | 0.29444444 |            | 0.294444444 |             |           | 0.255814  |
| ENSG0000197604 |            | 0.22256098 |            | 0.222560976 |             |           | 0.0647059 |
| ENSG0000150667 |            | 0.14848485 |            | 0.148484848 |             |           |           |
| ENSG0000168297 |            | 0.34756098 |            | 0.347560976 |             |           |           |
| ENSG0000111731 | 0.22155689 |            | 0.22155689 |             |             |           |           |
| ENSG0000184210 | 0.29216867 |            | 0.29216867 |             | 0.125       | 0.0988372 |           |
| ENSG0000187554 |            |            |            |             | 0.083333333 | 0.0755814 |           |
| ENSG0000101557 |            | 0.32777778 |            | 0.327777778 |             |           | 0.1931818 |
| ENSG0000165458 |            | 0.05555556 |            | 0.055555556 |             |           | 0.0909091 |
| ENSG0000100599 |            | 0.43333333 |            | 0.433333333 |             |           | 0.3411765 |
| ENSG0000168939 |            | 0.35555556 |            | 0.355555556 |             |           | 0.5       |
| ENSG0000152782 |            | 0.28658537 |            | 0.286585366 |             |           | 0.4216867 |
| ENSG0000160188 |            | 0.10606061 |            | 0.106060606 | 0.136904762 | 0.1860465 | 0.2906977 |
| ENSG0000134115 | 0.46987952 | 0.43333333 | 0.46987952 | 0.433333333 | 0.44047619  | 0.4069767 | 0.4127907 |
| ENSG0000171223 | 0.2005988  |            | 0.2005988  |             |             |           |           |
| ENSG0000153015 | 0.11976048 |            | 0.11976048 |             | 0.482142857 | 0.4651163 |           |
| ENSG0000158286 | 0.36363636 | 0.37575758 | 0.36363636 | 0.375757576 | 0.107142857 | 0.0872093 | 0.3023256 |
| ENSG0000121892 |            |            |            |             |             |           | 0.2906977 |
| ENSG0000215218 |            | 0.10670732 |            | 0.106707317 |             |           | 0.0988372 |
| ENSG0000119711 |            | 0.18484848 |            | 0.184848485 |             |           | 0.2732558 |
| ENSG0000149516 |            | 0.34848485 |            | 0.348484848 |             |           | 0.1918605 |
| ENSG0000165698 | 0.31736527 | 0.42424242 | 0.31736527 | 0.424242424 |             |           | 0.3488372 |
| ENSG0000239697 |            | 0.19090909 |            | 0.190909091 |             |           | 0.0823529 |
| ENSG0000132155 |            | 0.14848485 |            | 0.148484848 |             |           |           |
| ENSG0000152056 | 0.33888889 | 0.37974684 | 0.33888889 | 0.379746835 |             | 0.125     | 0.3977273 |
| ENSG0000079313 |            | 0.29754601 |            | 0.297546012 |             |           | 0.4390244 |
| ENSG0000124613 | 0.41017964 | 0.23939394 | 0.41017964 | 0.239393939 | 0.386904762 | 0.4767442 | 0.3888889 |
| ENSG0000163875 |            | 0.23033708 |            | 0.230337079 |             |           | 0.3023256 |
| ENSG0000101940 | 0.36826347 |            | 0.36826347 |             | 0.125       | 0.0523256 |           |
| ENSG0000196371 |            | 0.37654321 |            | 0.37654321  |             |           | 0.2705882 |
| ENSG0000148634 |            | 0.30254777 |            | 0.302547771 |             |           | 0.1860465 |
| ENSG0000136866 |            | 0.4695122  |            | 0.469512195 |             |           | 0.3837209 |
| ENSG0000162849 | 0.18888889 |            | 0.18888889 |             |             | 0.1022727 |           |
| ENSG0000116237 |            | 0.08484848 |            | 0.084848485 |             |           | 0.0755814 |
| ENSG0000167608 | 0.36904762 | 0.45       | 0.36904762 | 0.45        | 0.433333333 | 0.2159091 | 0.2840909 |
| ENSG0000170542 |            | 0.48787879 |            | 0.487878788 |             |           | 0.4470588 |
| ENSG0000149809 |            | 0.38787879 |            | 0.387878788 |             |           | 0.2325581 |
| ENSG0000101695 | 0.0508982  | 0.13030303 | 0.0508982  | 0.13030303  |             |           |           |

|                |            |            |            |             |             |           |                     |
|----------------|------------|------------|------------|-------------|-------------|-----------|---------------------|
| ENSG0000007392 | 0.43712575 |            | 0.43712575 |             | 0.482142857 |           | 0.3895349           |
| ENSG0000142327 | 0.30838323 |            | 0.30838323 |             |             |           |                     |
| ENSG0000145888 | 0.23652695 |            | 0.23652695 |             | 0.363095238 |           | 0.4117647           |
| ENSG0000130783 |            | 0.10606061 |            | 0.106060606 | 0.375       |           | 0.3023256 0.2267442 |
| ENSG0000163964 |            |            |            |             |             |           | 0.0568182           |
| ENSG0000095209 |            | 0.16292135 |            | 0.162921348 |             |           | 0.4                 |
| ENSG0000141959 | 0.23636364 | 0.43167702 | 0.23636364 | 0.431677019 | 0.375       | 0.4127907 | 0.4127907           |
| ENSG0000147027 |            | 0.17272727 |            | 0.172727273 |             |           | 0.4470588           |
| ENSG0000074755 |            | 0.40909091 |            | 0.409090909 |             |           | 0.377907            |
| ENSG0000217340 |            | 0.48787879 |            | 0.487878788 |             |           | 0.4418605           |
| ENSG0000105852 |            | 0.47878788 |            | 0.478787879 |             |           | 0.1569767           |
| ENSG0000131730 |            | 0.31212121 |            | 0.312121212 |             |           | 0.0523256           |
| ENSG0000160360 |            | 0.4689441  |            | 0.468944099 |             |           | 0.2882353           |
| ENSG0000165192 |            | 0.40853659 |            | 0.408536585 |             |           | 0.4476744           |
| ENSG0000134812 | 0.17365269 | 0.07272727 | 0.17365269 | 0.072727273 |             |           | 0.0697674           |
| ENSG0000133055 |            | 0.4137931  |            | 0.413793103 |             |           | 0.2613636           |
| ENSG0000104524 | 0.21257485 | 0.26363636 | 0.21257485 | 0.263636364 | 0.369047619 | 0.4011628 | 0.4011628           |
| ENSG0000115226 |            | 0.43125    |            | 0.43125     |             |           | 0.0952381           |
| ENSG0000116353 |            | 0.10909091 |            | 0.109090909 |             |           | 0.4883721           |
| ENSG0000168496 |            | 0.37575758 |            | 0.375757576 |             |           | 0.3023256           |
| ENSG0000169371 |            | 0.23780488 |            | 0.237804878 |             |           |                     |
| ENSG0000094975 |            | 0.1030303  |            | 0.103030303 |             |           |                     |
| ENSG0000134551 |            | 0.26111111 |            | 0.261111111 |             |           | 0.1976744           |
| ENSG0000214112 | 0.09580838 |            | 0.09580838 |             |             |           |                     |
| ENSG0000159210 | 0.06586826 | 0.32621951 | 0.06586826 | 0.326219512 |             |           | 0.244186            |
| ENSG0000147127 | 0.49698795 |            | 0.49698795 |             |             | 0.0697674 | 0.0813953           |
| ENSG0000174197 |            | 0.1091954  |            | 0.109195402 |             |           | 0.0681818           |
| ENSG0000163357 |            | 0.31212121 |            | 0.312121212 |             |           | 0.0639535           |
| ENSG0000169752 | 0.06024096 |            | 0.06024096 |             |             |           |                     |
| ENSG0000158711 |            | 0.13636364 |            | 0.136363636 |             |           | 0.4127907           |
| ENSG0000180953 | 0.05555556 |            | 0.05555556 |             | 0.261363636 | 0.2333333 |                     |
| ENSG0000138785 | 0.32035928 |            | 0.32035928 |             |             | 0.0523256 |                     |
| ENSG0000106077 |            | 0.44545455 |            | 0.445454545 |             |           | 0.4883721           |
| ENSG0000166569 |            | 0.4        |            | 0.4         |             |           | 0.4709302           |
| ENSG0000144048 | 0.48203593 |            | 0.48203593 |             | 0.25        | 0.3430233 |                     |
| ENSG0000140937 | 0.26347305 | 0.26111111 | 0.26347305 | 0.261111111 |             |           | 0.3636364           |
| ENSG0000176472 | 0.21856287 |            | 0.21856287 |             | 0.101190476 | 0.1453488 |                     |
| ENSG0000107249 | 0.45555556 | 0.48484848 | 0.45555556 | 0.484848485 | 0.322222222 | 0.3888889 | 0.4476744           |
| ENSG0000175294 | 0.47005988 |            | 0.47005988 |             | 0.464285714 | 0.3488372 |                     |
| ENSG0000006831 |            | 0.4969697  |            | 0.496969697 |             |           | 0.4302326           |
| ENSG0000235531 | 0.06666667 | 0.15757576 | 0.06666667 | 0.157575758 |             |           | 0.1                 |
| ENSG0000078295 | 0.07784431 | 0.43030303 | 0.07784431 | 0.43030303  |             |           | 0.4883721           |
| ENSG0000160183 | 0.38922156 | 0.23333333 | 0.38922156 | 0.233333333 | 0.422619048 | 0.4709302 | 0.4302326           |
| ENSG0000101347 |            | 0.46969697 |            | 0.46969697  |             |           | 0.3529412           |
| ENSG0000136240 |            | 0.18484848 |            | 0.184848485 |             |           | 0.2916667           |
| ENSG0000134545 |            | 0.16981132 |            | 0.169811321 |             |           | 0.3823529           |
| ENSG0000244687 |            | 0.33146067 |            | 0.331460674 |             |           | 0.2613636           |
| ENSG0000116209 | 0.32634731 |            | 0.32634731 |             | 0.197368421 | 0.3571429 |                     |
| ENSG0000152583 | 0.49101796 |            | 0.49101796 |             | 0.476190476 | 0.3953488 |                     |
| ENSG0000162222 | 0.18235294 |            | 0.18235294 |             |             |           |                     |
| ENSG0000211689 |            | 0.24848485 |            | 0.248484848 |             |           | 0.3197674           |
| ENSG0000153902 |            | 0.35151515 |            | 0.351515152 |             |           | 0.1337209           |
| ENSG0000122912 |            | 0.06111111 |            | 0.061111111 |             |           | 0.1444444           |
| ENSG0000151247 | 0.06586826 | 0.37962963 | 0.06586826 | 0.37962963  | 0.30952381  | 0.2470588 | 0.2222222           |

|                 |            |            |            |             |             |           |            |
|-----------------|------------|------------|------------|-------------|-------------|-----------|------------|
| ENSG00000106603 | 0.0813253  | 0.44242424 | 0.0813253  | 0.442424242 | 0.321428571 | 0.3470588 | 0.3488372  |
| ENSG00000133422 | 0.47272727 |            | 0.47272727 |             | 0.369047619 | 0.4       |            |
| ENSG00000119048 | 0.32335329 |            | 0.32335329 |             | 0.06547619  | 0.0581395 | 0.0581395  |
| ENSG00000167995 | 0.23353293 | 0.32424242 | 0.23353293 | 0.324242424 | 0.291666667 | 0.1569767 | 0.2674419  |
| ENSG00000203778 |            | 0.47239264 |            | 0.472392638 |             |           | 0.4058824  |
| ENSG00000021645 | 0.26666667 | 0.24545455 | 0.26666667 | 0.245454545 | 0.488888889 | 0.3222222 | 0.24444444 |
| ENSG00000049656 |            | 0.16969697 |            | 0.16969697  |             |           |            |
| ENSG00000181915 |            | 0.47777778 |            | 0.477777778 |             |           | 0.4        |
| ENSG00000109685 |            | 0.09090909 |            | 0.090909091 |             |           |            |
| ENSG00000165238 | 0.24719101 | 0.06666667 | 0.24719101 | 0.066666667 | 0.428571429 | 0.4476744 |            |
| ENSG00000105523 |            | 0.41515152 |            | 0.415151515 |             |           |            |
| ENSG00000181026 | 0.14156627 | 0.10909091 | 0.14156627 | 0.109090909 | 0.255952381 | 0.25      | 0.2777778  |
| ENSG00000187140 |            | 0.2195122  |            | 0.219512195 |             |           | 0.1976744  |
| ENSG00000139146 |            |            |            |             |             |           | 0.2674419  |
| ENSG00000152595 |            | 0.17791411 |            | 0.17791411  |             |           | 0.255814   |
| ENSG00000135387 | 0.25842697 | 0.09444444 | 0.25842697 | 0.094444444 |             |           |            |
| ENSG00000137101 |            | 0.43678161 |            | 0.436781609 |             |           | 0.4767442  |
| ENSG00000137942 |            |            |            |             |             |           | 0.060241   |
| ENSG00000160201 | 0.42777778 |            | 0.42777778 |             | 0.101190476 | 0.1046512 |            |
| ENSG00000133121 | 0.1497006  | 0.40490798 | 0.1497006  | 0.404907975 | 0.101190476 | 0.0930233 | 0.4534884  |
| ENSG00000170419 | 0.42814371 | 0.42121212 | 0.42814371 | 0.421212121 | 0.333333333 | 0.3139535 | 0.4117647  |
| ENSG00000164949 | 0.31137725 | 0.36666667 | 0.31137725 | 0.366666667 | 0.172619048 | 0.2674419 | 0.2906977  |
| ENSG00000215041 |            | 0.41212121 |            | 0.412121212 |             |           | 0.0697674  |
| ENSG00000182022 |            | 0.45757576 |            | 0.457575758 |             |           | 0.4767442  |
| ENSG00000112031 |            | 0.24157303 |            | 0.241573034 |             |           | 0.2555556  |
| ENSG00000168003 | 0.05389222 | 0.24545455 | 0.05389222 | 0.245454545 | 0.180722892 | 0.1976744 | 0.1976744  |
| ENSG00000119227 |            | 0.42682927 |            | 0.426829268 |             |           | 0.2965116  |
| ENSG00000107187 |            |            |            |             |             |           | 0.0909091  |
| ENSG00000079335 | 0.24137931 | 0.12424242 | 0.24137931 | 0.124242424 | 0.477272727 | 0.4772727 | 0.126506   |
| ENSG00000168036 | 0.29375    | 0.48181818 | 0.29375    | 0.481818182 | 0.24691358  | 0.2256098 | 0.2790698  |
| ENSG00000141698 |            | 0.24444444 |            | 0.244444444 |             |           | 0.1333333  |
| ENSG00000119771 |            | 0.47256098 |            | 0.472560976 |             |           | 0.1704545  |
| ENSG00000142494 |            | 0.15517241 |            | 0.155172414 | 0.06547619  | 0.0813953 | 0.4883721  |
| ENSG00000144488 |            | 0.37878788 |            | 0.378787879 |             |           | 0.3764706  |
| ENSG00000066827 |            | 0.3969697  |            | 0.396969697 |             |           | 0.4651163  |
| ENSG00000124203 |            | 0.31987578 |            | 0.319875776 |             |           | 0.4204545  |
| ENSG00000123739 |            | 0.43030303 |            | 0.43030303  |             |           | 0.2176471  |
| ENSG00000147378 | 0.12874251 | 0.06402439 | 0.12874251 | 0.06402439  |             |           | 0.3372093  |
| ENSG00000141497 |            | 0.05792683 |            | 0.057926829 |             |           | 0.2151163  |
| ENSG00000112238 |            | 0.20606061 |            | 0.206060606 |             |           |            |
| ENSG00000204049 |            | 0.37575758 |            | 0.375757576 |             |           | 0.2790698  |
| ENSG00000164823 | 0.22891566 |            | 0.22891566 |             | 0.482142857 | 0.4186047 | 0.2093023  |
| ENSG00000113209 |            | 0.06060606 |            | 0.060606061 |             |           | 0.1162791  |
| ENSG00000239789 |            | 0.25153374 |            | 0.251533742 | 0.101190476 |           |            |
| ENSG00000183230 |            | 0.21818182 |            | 0.218181818 |             |           |            |
| ENSG00000162783 | 0.23952096 |            | 0.23952096 |             | 0.113095238 | 0.0988372 |            |
| ENSG00000198502 |            | 0.32704403 |            | 0.327044025 |             |           | 0.3253012  |
| ENSG00000114771 | 0.37125749 | 0.45757576 | 0.37125749 | 0.457575758 | 0.404761905 | 0.3081395 | 0.4069767  |
| ENSG00000103187 |            | 0.29090909 |            | 0.290909091 |             |           | 0.4244186  |
| ENSG00000101132 |            | 0.44848485 |            | 0.448484848 |             |           | 0.1918605  |
| ENSG00000198026 |            | 0.11656442 |            | 0.116564417 |             |           | 0.2674419  |
| ENSG00000078061 |            | 0.378125   |            | 0.378125    |             |           | 0.4588235  |
| ENSG00000158315 | 0.46629213 | 0.44848485 | 0.46629213 | 0.448484848 | 0.290697674 | 0.25      | 0.244186   |
| ENSG00000160712 | 0.38068182 | 0.23863636 | 0.38068182 | 0.238636364 | 0.422222222 | 0.4767442 | 0.1888889  |

|                 |            |            |            |             |             |           |           |
|-----------------|------------|------------|------------|-------------|-------------|-----------|-----------|
| ENSG00000163820 | 0.07784431 | 0.36666667 | 0.07784431 | 0.36666667  |             | 0.0988372 | 0.4883721 |
| ENSG00000241106 | 0.2560241  | 0.22727273 | 0.2560241  | 0.227272727 | 0.43452381  | 0.4825581 | 0.3313953 |
| ENSG00000146386 | 0.39655172 | 0.4695122  | 0.39655172 | 0.469512195 | 0.244444444 | 0.2272727 | 0.0941176 |
| ENSG00000169231 | 0.24850299 |            | 0.24850299 |             |             |           |           |
| ENSG00000075790 |            | 0.27777778 |            | 0.27777778  |             |           | 0.3197674 |
| ENSG00000152818 | 0.17222222 | 0.21472393 | 0.17222222 | 0.214723926 | 0.266666667 | 0.2555556 | 0.4666667 |
| ENSG00000015475 | 0.06666667 | 0.17878788 | 0.06666667 | 0.178787879 | 0.122222222 | 0.125     | 0.122093  |
| ENSG00000124343 | 0.28963415 | 0.16975309 | 0.28963415 | 0.169753086 |             |           | 0.2797619 |
| ENSG00000117411 | 0.21856287 | 0.06969697 | 0.21856287 | 0.06969697  | 0.178571429 | 0.1627907 | 0.2906977 |
| ENSG00000168334 | 0.44311377 | 0.23333333 | 0.44311377 | 0.233333333 | 0.220238095 | 0.2151163 | 0.1802326 |
| ENSG00000119638 | 0.39444444 | 0.48484848 | 0.39444444 | 0.484848485 | 0.172619048 | 0.2571429 | 0.2117647 |
| ENSG00000128908 |            | 0.35632184 |            | 0.356321839 |             |           | 0.25      |
| ENSG00000204851 |            |            |            |             |             |           | 0.1686047 |
| ENSG00000198732 |            | 0.22424242 |            | 0.224242424 |             |           | 0.4709302 |
| ENSG00000166188 |            | 0.4        |            | 0.4         |             |           | 0.4418605 |
| ENSG00000182013 | 0.27844311 | 0.32121212 | 0.27844311 | 0.321212121 | 0.19047619  | 0.1104651 | 0.127907  |
| ENSG00000027847 |            | 0.4847561  |            | 0.484756098 |             |           | 0.1686047 |
| ENSG00000128610 | 0.38622754 |            | 0.38622754 |             | 0.416666667 | 0.4294118 |           |
| ENSG00000205439 |            | 0.33146067 |            | 0.331460674 |             |           | 0.4659091 |
| ENSG00000147421 |            | 0.31666667 |            | 0.316666667 |             |           | 0.4767442 |
| ENSG00000159212 |            | 0.06134969 |            | 0.061349693 |             |           |           |
| ENSG00000138813 |            | 0.23888889 |            | 0.238888889 |             |           | 0.2159091 |
| ENSG00000129038 |            | 0.47272727 |            | 0.472727273 |             |           | 0.3197674 |
| ENSG00000204524 | 0.24444444 | 0.42424242 | 0.24444444 | 0.424242424 | 0.211111111 | 0.2272727 | 0.4244186 |
| ENSG00000089248 |            | 0.11585366 |            | 0.115853659 |             |           | 0.4090909 |
| ENSG00000205279 | 0.08383234 | 0.43333333 | 0.08383234 | 0.433333333 | 0.30952381  | 0.2906977 | 0.3023256 |
| ENSG00000254870 |            | 0.39411765 |            | 0.394117647 |             |           | 0.0988372 |
| ENSG00000186010 | 0.16455696 |            | 0.16455696 |             |             |           |           |
| ENSG00000170523 |            | 0.37931034 |            | 0.379310345 |             |           | 0.1860465 |
| ENSG00000153914 |            | 0.08045977 |            | 0.08045977  |             |           | 0.1453488 |
| ENSG00000169504 |            | 0.26993865 |            | 0.26993865  |             |           | 0.4767442 |
| ENSG00000077454 | 0.05389222 |            | 0.05389222 |             | 0.261904762 | 0.2965116 |           |
| ENSG00000178919 | 0.29216867 | 0.43636364 | 0.29216867 | 0.436363636 | 0.144578313 | 0.122093  | 0.1235294 |
| ENSG00000139990 | 0.2245509  | 0.33030303 | 0.2245509  | 0.33030303  |             |           | 0.0639535 |
| ENSG00000117139 | 0.41017964 | 0.24545455 | 0.41017964 | 0.245454545 | 0.488095238 | 0.3705882 | 0.1976744 |
| ENSG00000076108 | 0.2994012  |            | 0.2994012  |             | 0.214285714 | 0.3255814 |           |
| ENSG00000132478 |            |            |            |             |             |           | 0.3430233 |
| ENSG00000177409 |            | 0.23030303 |            | 0.23030303  |             |           | 0.377907  |
| ENSG00000204304 |            | 0.2183908  |            | 0.218390805 |             |           | 0.3372093 |
| ENSG00000185019 |            | 0.38719512 |            | 0.387195122 |             |           | 0.122093  |
| ENSG00000109118 |            | 0.20114943 |            | 0.201149425 |             |           | 0.0909091 |
| ENSG00000166949 | 0.43975904 | 0.48780488 | 0.43975904 | 0.487804878 | 0.464285714 | 0.4302326 | 0.4529412 |
| ENSG00000147586 | 0.16666667 |            | 0.16666667 |             | 0.144444444 | 0.0909091 |           |
| ENSG00000197070 |            | 0.1        |            | 0.1         |             |           | 0.1104651 |
| ENSG00000127526 |            | 0.07878788 |            | 0.078787879 |             |           | 0.1104651 |
| ENSG00000128242 |            |            |            |             | 0.36746988  | 0.2882353 |           |
| ENSG00000138767 |            | 0.14417178 |            | 0.144171779 |             |           | 0.1931818 |
| ENSG00000186960 |            | 0.34090909 |            | 0.340909091 |             |           |           |
| ENSG00000184292 |            | 0.18787879 |            | 0.187878788 |             |           | 0.1453488 |
| ENSG00000100242 |            | 0.34269663 |            | 0.342696629 |             |           | 0.4767442 |
| ENSG00000180481 | 0.21556886 |            | 0.21556886 |             | 0.494047619 | 0.4883721 |           |
| ENSG00000198704 |            | 0.08181818 |            | 0.081818182 |             |           | 0.4825581 |
| ENSG00000100246 |            | 0.19090909 |            | 0.190909091 |             |           | 0.0813953 |
| ENSG00000182568 | 0.21257485 | 0.37804878 | 0.21257485 | 0.37804878  | 0.343373494 | 0.3197674 | 0.3837209 |



|                 |            |            |            |             |             |           |           |
|-----------------|------------|------------|------------|-------------|-------------|-----------|-----------|
| ENSG00000180773 |            | 0.3006135  |            | 0.300613497 |             |           | 0.3231707 |
| ENSG00000221867 |            | 0.1882716  |            | 0.188271605 |             |           |           |
| ENSG00000104499 |            | 0.44817073 |            | 0.448170732 |             |           | 0.1569767 |
| ENSG00000204516 | 0.19753086 |            | 0.19753086 |             | 0.209302326 |           | 0.1704545 |
| ENSG00000204116 |            | 0.17575758 |            | 0.175757576 |             |           |           |
| ENSG00000132842 |            | 0.18787879 |            | 0.187878788 |             |           | 0.1627907 |
| ENSG00000165233 |            | 0.22424242 |            | 0.224242424 |             |           | 0.3095238 |
| ENSG00000178105 | 0.09281437 | 0.37931034 | 0.09281437 | 0.379310345 | 0.416666667 | 0.4767442 | 0.4       |
| ENSG00000196922 | 0.38622754 | 0.14848485 | 0.38622754 | 0.148484848 | 0.351190476 | 0.3352941 | 0.3488372 |
| ENSG00000171792 |            | 0.29411765 |            | 0.294117647 |             |           | 0.3181818 |
| ENSG00000103342 | 0.28614458 | 0.45121951 | 0.28614458 | 0.451219512 |             | 0.1104651 | 0.2325581 |
| ENSG00000037757 |            | 0.40909091 |            | 0.409090909 |             |           | 0.4069767 |
| ENSG00000114395 | 0.28443114 |            | 0.28443114 |             | 0.375       |           | 0.4825581 |
| ENSG00000203756 |            | 0.15757576 |            | 0.157575758 |             |           | 0.2906977 |
| ENSG00000170779 |            | 0.19512195 |            | 0.195121951 |             |           | 0.372093  |
| ENSG00000215193 |            | 0.41111111 |            | 0.411111111 |             |           | 0.4772727 |
| ENSG00000107719 |            | 0.21264368 |            | 0.212643678 |             |           | 0.3214286 |
| ENSG00000165118 | 0.20658683 | 0.23939394 | 0.20658683 | 0.239393939 | 0.422619048 | 0.4186047 | 0.2616279 |
| ENSG00000101605 | 0.30538922 | 0.43636364 | 0.30538922 | 0.436363636 | 0.416666667 | 0.3546512 | 0.4107143 |
| ENSG00000105650 |            | 0.30909091 |            | 0.309090909 |             |           | 0.2848837 |
| ENSG00000257594 |            | 0.27878788 |            | 0.278787879 |             |           | 0.1686047 |
| ENSG00000204866 | 0.08888889 | 0.36419753 | 0.08888889 | 0.364197531 | 0.122222222 |           | 0.4302326 |
| ENSG00000169570 |            | 0.28888889 |            | 0.288888889 |             |           | 0.1444444 |
| ENSG00000086300 | 0.23888889 |            | 0.23888889 |             | 0.443181818 |           | 0.3888889 |
| ENSG00000196260 |            | 0.26363636 |            | 0.263636364 |             |           | 0.4418605 |
| ENSG00000117640 |            | 0.22727273 |            | 0.227272727 | 0.369047619 | 0.3294118 |           |
| ENSG00000092345 | 0.21556886 | 0.26966292 | 0.21556886 | 0.269662921 | 0.220238095 | 0.2790698 | 0.4176471 |
| ENSG00000198185 | 0.35928144 |            | 0.35928144 |             | 0.369047619 |           | 0.2848837 |
| ENSG00000162267 |            | 0.11486486 |            | 0.114864865 |             |           | 0.0921053 |
| ENSG00000049283 | 0.12345679 | 0.20606061 | 0.12345679 | 0.206060606 | 0.122222222 | 0.1158537 |           |
| ENSG00000148308 |            | 0.33536585 |            | 0.335365854 |             |           | 0.1802326 |
| ENSG00000161850 |            | 0.46666667 |            | 0.466666667 |             |           | 0.3953488 |
| ENSG00000132294 | 0.5        | 0.14848485 | 0.5        | 0.148484848 | 0.289156627 | 0.2797619 |           |
| ENSG00000166670 |            | 0.31481481 |            | 0.314814815 |             |           | 0.1686747 |
| ENSG00000168566 |            | 0.35454545 |            | 0.354545455 |             |           | 0.4545455 |
| ENSG00000237240 |            | 0.37931034 |            | 0.379310345 |             |           | 0.4593023 |
| ENSG00000168386 | 0.12222222 |            | 0.12222222 |             |             |           |           |
| ENSG00000161572 |            |            |            |             |             |           | 0.1777778 |
| ENSG00000100284 | 0.21111111 | 0.22727273 | 0.21111111 | 0.227272727 | 0.464285714 | 0.3444444 | 0.2267442 |
| ENSG00000154175 | 0.23652695 | 0.4537037  | 0.23652695 | 0.453703704 | 0.214285714 | 0.3372093 | 0.4651163 |
| ENSG00000175309 |            | 0.11818182 |            | 0.118181818 |             |           | 0.0872093 |
| ENSG00000017260 | 0.15060241 |            | 0.15060241 |             | 0.174698795 |           | 0.1964286 |
| ENSG00000244411 |            | 0.18484848 |            | 0.184848485 |             |           | 0.3837209 |
| ENSG00000198791 | 0.18333333 | 0.45454545 | 0.18333333 | 0.454545455 |             |           | 0.25      |
| ENSG00000156966 |            | 0.22727273 |            | 0.227272727 |             |           | 0.2352941 |
| ENSG00000135930 |            | 0.46666667 |            | 0.466666667 | 0.077380952 | 0.1569767 | 0.3068182 |
| ENSG00000256269 | 0.07185629 |            | 0.07185629 |             | 0.253012048 | 0.25      |           |
| ENSG00000124731 |            | 0.47575758 |            | 0.475757576 |             |           | 0.3313953 |
| ENSG00000146232 |            | 0.1744186  |            | 0.174418605 |             |           | 0.4772727 |
| ENSG00000214435 |            | 0.26666667 |            | 0.266666667 |             |           | 0.3604651 |
| ENSG00000124374 |            | 0.33939394 |            | 0.339393939 |             |           | 0.4111111 |
| ENSG00000173473 |            | 0.40853659 |            | 0.408536585 |             |           | 0.2383721 |
| ENSG00000203795 | 0.43888889 |            | 0.43888889 |             | 0.477272727 | 0.3863636 |           |
| ENSG00000138678 |            | 0.38414634 |            | 0.384146341 |             |           | 0.5       |

|                 |            |            |            |             |             |           |           |
|-----------------|------------|------------|------------|-------------|-------------|-----------|-----------|
| ENSG00000140307 | 0.24444444 | 0.3190184  | 0.24444444 | 0.319018405 | 0.369047619 | 0.4186047 | 0.4235294 |
| ENSG00000102683 | 0.11976048 | 0.44545455 | 0.11976048 | 0.445454545 | 0.160714286 | 0.1395349 | 0.4651163 |
| ENSG00000173557 |            | 0.33888889 |            | 0.338888889 |             |           | 0.4545455 |
| ENSG00000112769 |            | 0.23780488 |            | 0.237804878 |             |           | 0.2616279 |
| ENSG00000196792 | 0.25149701 | 0.48148148 | 0.25149701 | 0.481481481 |             |           | 0.3882353 |
| ENSG00000164485 | 0.26506024 | 0.25151515 | 0.26506024 | 0.251515152 | 0.369047619 | 0.4534884 | 0.1860465 |
| ENSG00000198513 |            |            |            |             | 0.202380952 | 0.2267442 | 0.2       |
| ENSG00000138688 | 0.05688623 |            | 0.05688623 |             | 0.107142857 | 0.1411765 |           |
| ENSG00000168288 | 0.2        | 0.44444444 | 0.2        | 0.444444444 | 0.188888889 | 0.1444444 | 0.125     |
| ENSG00000089006 | 0.14071856 |            | 0.14071856 |             | 0.43452381  | 0.3941176 |           |
| ENSG00000176774 | 0.13554217 | 0.24848485 | 0.13554217 | 0.248484848 | 0.174698795 | 0.1337209 | 0.3392857 |
| ENSG00000157933 |            | 0.13125    |            | 0.13125     |             |           | 0.1511628 |
| ENSG00000175787 | 0.32934132 |            | 0.32934132 |             | 0.416666667 | 0.4244186 |           |
| ENSG00000164508 | 0.08682635 |            | 0.08682635 |             | 0.285714286 | 0.2823529 | 0.1       |
| ENSG00000141161 |            | 0.33908046 |            | 0.33908046  |             |           | 0.4090909 |
| ENSG00000091137 | 0.34431138 | 0.16111111 | 0.34431138 | 0.161111111 | 0.343373494 | 0.3352941 | 0.3068182 |
| ENSG00000119397 | 0.42424242 |            | 0.42424242 |             | 0.433333333 | 0.4090909 |           |
| ENSG00000115561 |            | 0.46363636 |            | 0.463636364 |             |           | 0.3023256 |
| ENSG00000154767 | 0.39655172 | 0.4        | 0.39655172 | 0.4         | 0.088888889 |           | 0.4127907 |
| ENSG00000105290 |            |            |            |             |             |           | 0.0639535 |
| ENSG00000124092 |            | 0.4        |            | 0.4         |             |           | 0.4767442 |
| ENSG00000008130 | 0.12275449 |            | 0.12275449 |             |             |           |           |
| ENSG00000105186 |            | 0.25454545 |            | 0.254545455 |             |           | 0.494186  |
| ENSG00000153993 | 0.15868263 | 0.4030303  | 0.15868263 | 0.403030303 | 0.083333333 | 0.0755814 | 0.246988  |
| ENSG00000198612 | 0.45555556 | 0.06962025 | 0.45555556 | 0.069620253 |             |           |           |
| ENSG00000100227 |            | 0.29090909 |            | 0.290909091 |             |           | 0.4069767 |
| ENSG00000110047 | 0.0505618  | 0.45151515 | 0.0505618  | 0.451515152 | 0.44047619  | 0.4512195 | 0.4545455 |
| ENSG00000154237 | 0.36419753 | 0.39393939 | 0.36419753 | 0.393939394 | 0.226190476 | 0.2906977 | 0.3313953 |
| ENSG00000140451 | 0.23053892 | 0.07272727 | 0.23053892 | 0.072727273 | 0.220238095 | 0.1104651 | 0.1744186 |
| ENSG00000167880 |            | 0.34242424 |            | 0.342424242 |             |           | 0.4825581 |
| ENSG00000173626 | 0.07222222 | 0.35757576 | 0.07222222 | 0.357575758 |             |           | 0.3604651 |
| ENSG00000243811 |            | 0.48181818 |            | 0.481818182 |             |           | 0.2616279 |
| ENSG00000115170 | 0.36826347 | 0.27878788 | 0.36826347 | 0.278787879 |             |           | 0.2529412 |
| ENSG00000175467 |            | 0.5        |            | 0.5         |             |           | 0.3197674 |
| ENSG00000166167 |            | 0.49444444 |            | 0.494444444 |             |           | 0.1590909 |
| ENSG00000137331 | 0.11077844 | 0.14545455 | 0.11077844 | 0.145454545 | 0.053571429 | 0.1569767 | 0.0581395 |
| ENSG00000137492 |            |            |            |             | 0.333333333 | 0.2906977 |           |
| ENSG00000102910 |            | 0.16060606 |            | 0.160606061 |             |           |           |
| ENSG00000170967 |            | 0.48850575 |            | 0.488505747 |             |           | 0.4659091 |
| ENSG00000162377 |            | 0.36666667 |            | 0.366666667 |             |           | 0.1569767 |
| ENSG00000006015 |            | 0.4054878  |            | 0.405487805 |             |           | 0.3837209 |
| ENSG00000124357 | 0.08895706 | 0.29393939 | 0.08895706 | 0.293939394 | 0.111111111 | 0.122093  | 0.2444444 |
| ENSG00000146263 |            | 0.48787879 |            | 0.487878788 |             |           | 0.2682927 |
| ENSG00000198944 |            | 0.17878788 |            | 0.178787879 |             |           | 0.1337209 |
| ENSG00000062524 |            | 0.2808642  |            | 0.280864198 |             |           | 0.1704545 |
| ENSG00000198853 | 0.49401198 |            | 0.49401198 |             | 0.303571429 | 0.4302326 |           |
| ENSG00000169550 |            | 0.25454545 |            | 0.254545455 |             |           | 0.2151163 |
| ENSG00000177426 | 0.34131737 | 0.41818182 | 0.34131737 | 0.418181818 | 0.177777778 | 0.1627907 | 0.1569767 |
| ENSG00000006695 | 0.48502994 | 0.37575758 | 0.48502994 | 0.375757576 | 0.380952381 | 0.4883721 | 0.2616279 |
| ENSG00000110931 | 0.27844311 | 0.26666667 | 0.27844311 | 0.266666667 | 0.172619048 | 0.1511628 | 0.4709302 |
| ENSG00000177054 | 0.25449102 |            | 0.25449102 |             | 0.261904762 | 0.2823529 |           |
| ENSG00000162877 |            | 0.32183908 |            | 0.32183908  |             |           | 0.4659091 |
| ENSG00000171385 |            | 0.4030303  |            | 0.403030303 |             |           | 0.3953488 |
| ENSG00000167751 |            | 0.26666667 |            | 0.266666667 |             |           | 0.1918605 |

|                 |            |            |            |             |             |           |           |
|-----------------|------------|------------|------------|-------------|-------------|-----------|-----------|
| ENSG00000111816 | 0.3        | 0.38181818 | 0.3        | 0.381818182 |             |           | 0.2058824 |
| ENSG00000134644 |            | 0.12777778 |            | 0.12777778  |             |           |           |
| ENSG00000176994 | 0.10778443 |            | 0.10778443 |             | 0.494047619 | 0.4705882 |           |
| ENSG00000101266 |            | 0.38484848 |            | 0.384848485 |             |           | 0.3604651 |
| ENSG00000115602 | 0.41515152 | 0.42727273 | 0.41515152 | 0.427272727 | 0.155555556 | 0.1768293 | 0.5       |
| ENSG00000115091 |            | 0.37777778 |            | 0.37777778  |             |           | 0.4545455 |
| ENSG00000188859 |            | 0.34242424 |            | 0.342424242 |             |           | 0.2034884 |
| ENSG00000187486 |            | 0.37272727 |            | 0.372727273 |             |           | 0.4476744 |
| ENSG00000132589 |            | 0.28787879 |            | 0.287878788 |             |           | 0.2965116 |
| ENSG00000140623 | 0.14371257 |            | 0.14371257 |             | 0.30952381  | 0.3529412 |           |
| ENSG00000111665 | 0.07386364 |            | 0.07386364 |             | 0.344444444 | 0.3977273 |           |
| ENSG00000171451 |            | 0.37777778 |            | 0.37777778  | 0.19047619  | 0.1860465 | 0.5       |
| ENSG00000242220 |            | 0.13888889 |            | 0.138888889 |             |           |           |
| ENSG00000103148 |            | 0.14634146 |            | 0.146341463 |             |           | 0.2965116 |
| ENSG00000169242 |            | 0.38787879 |            | 0.387878788 |             |           | 0.0988372 |
| ENSG00000203783 |            | 0.19393939 |            | 0.193939394 |             |           | 0.0872093 |
| ENSG00000151320 | 0.38622754 | 0.45962733 | 0.38622754 | 0.459627329 | 0.166666667 | 0.0813953 | 0.3197674 |
| ENSG00000204899 | 0.08383234 | 0.22222222 | 0.08383234 | 0.222222222 | 0.458333333 | 0.4476744 |           |
| ENSG00000040487 | 0.15454545 | 0.33529412 | 0.15454545 | 0.335294118 | 0.396341463 | 0.4825581 |           |
| ENSG00000077713 |            | 0.4847561  |            | 0.484756098 |             |           | 0.494186  |
| ENSG00000142168 | 0.16766467 |            | 0.16766467 |             |             |           | 0.0755814 |
| ENSG00000114383 |            | 0.08484848 |            | 0.084848485 |             |           |           |
| ENSG00000024862 | 0.22754491 | 0.28484848 | 0.22754491 | 0.284848485 |             | 0.1235294 | 0.2674419 |
| ENSG00000164690 | 0.08083832 | 0.49393939 | 0.08083832 | 0.493939394 |             |           | 0.25      |
| ENSG00000115540 |            | 0.17222222 |            | 0.172222222 |             |           | 0.2272727 |
| ENSG00000054796 |            | 0.22777778 |            | 0.22777778  |             |           | 0.0555556 |
| ENSG00000164405 | 0.23888889 |            | 0.23888889 |             | 0.476190476 | 0.5       |           |
| ENSG00000204876 | 0.4251497  |            | 0.4251497  |             | 0.357142857 | 0.4360465 |           |
| ENSG00000151967 |            |            |            | 0.101190476 |             | 0.0697674 |           |
| ENSG00000185838 |            | 0.38484848 |            | 0.384848485 |             |           | 0.3882353 |
| ENSG00000163873 |            | 0.11212121 |            | 0.112121212 |             |           | 0.0588235 |
| ENSG00000198121 |            | 0.4030303  |            | 0.403030303 |             |           | 0.4593023 |
| ENSG00000146411 |            | 0.41818182 |            | 0.418181818 |             |           | 0.2857143 |
| ENSG00000107758 |            | 0.08536585 |            | 0.085365854 |             |           | 0.4941176 |
| ENSG00000153347 | 0.1497006  | 0.35185185 | 0.1497006  | 0.351851852 |             |           | 0.1860465 |
| ENSG00000162757 |            | 0.42121212 |            | 0.421212121 |             |           | 0.2209302 |
| ENSG00000120690 | 0.11676647 | 0.28787879 | 0.11676647 | 0.287878788 | 0.196428571 | 0.2151163 | 0.255814  |
| ENSG00000064199 | 0.42814371 | 0.36280488 | 0.42814371 | 0.362804878 | 0.130952381 | 0.1453488 | 0.4186047 |
| ENSG00000037474 |            | 0.21515152 |            | 0.215151515 |             |           | 0.5       |
| ENSG00000112584 |            | 0.2030303  |            | 0.203030303 |             |           | 0.1802326 |
| ENSG00000188917 |            | 0.43820225 |            | 0.438202247 |             |           |           |
| ENSG00000166337 | 0.48802395 |            | 0.48802395 |             | 0.333333333 | 0.3662791 |           |
| ENSG00000139890 |            | 0.12195122 |            | 0.12195122  |             |           | 0.1627907 |
| ENSG00000121940 |            | 0.36060606 |            | 0.360606061 |             |           | 0.494186  |
| ENSG00000180815 | 0.31736527 |            | 0.31736527 |             |             |           |           |
| ENSG00000100926 | 0.0617284  |            | 0.0617284  |             |             |           |           |
| ENSG00000164626 |            | 0.44817073 |            | 0.448170732 |             |           | 0.3488372 |
| ENSG00000187609 | 0.0748503  | 0.49390244 | 0.0748503  | 0.493902439 |             |           | 0.3662791 |
| ENSG00000198286 |            |            |            |             |             |           | 0.126506  |
| ENSG00000003402 |            | 0.21910112 |            | 0.219101124 |             |           | 0.0581395 |
| ENSG00000125975 | 0.1497006  | 0.06666667 | 0.1497006  | 0.066666667 |             | 0.0581395 | 0.0581395 |
| ENSG00000171634 | 0.48333333 | 0.20606061 | 0.48333333 | 0.206060606 |             |           |           |
| ENSG00000103175 | 0.26347305 | 0.32183908 | 0.26347305 | 0.32183908  | 0.386904762 | 0.4825581 | 0.2857143 |
| ENSG00000182346 | 0.05792683 |            | 0.05792683 |             | 0.410714286 | 0.3430233 |           |

|                 |            |            |            |             |             |           |           |
|-----------------|------------|------------|------------|-------------|-------------|-----------|-----------|
| ENSG00000163590 |            | 0.48787879 |            | 0.487878788 |             |           | 0.4651163 |
| ENSG0000010270  | 0.1        | 0.125      | 0.1        | 0.125       | 0.155555556 | 0.0777778 | 0.4880952 |
| ENSG00000065923 |            | 0.16666667 |            | 0.16666667  |             |           | 0.3488372 |
| ENSG00000139209 | 0.49101796 | 0.20731707 | 0.49101796 | 0.207317073 | 0.363095238 | 0.4534884 | 0.4886364 |
| ENSG00000253110 | 0.40588235 |            | 0.40588235 |             | 0.487804878 |           | 0.4666667 |
| ENSG00000104936 | 0.07386364 |            | 0.07386364 |             | 0.155555556 |           | 0.1976744 |
| ENSG00000158560 |            | 0.12121212 |            | 0.121212121 |             |           |           |
| ENSG00000138279 | 0.14444444 | 0.06969697 | 0.14444444 | 0.06969697  |             |           |           |
| ENSG00000163687 | 0.2005988  |            | 0.2005988  |             | 0.373493976 | 0.4127907 |           |
| ENSG00000151418 |            | 0.06097561 |            | 0.06097561  |             |           |           |
| ENSG00000153446 |            | 0.31818182 |            | 0.318181818 |             |           | 0.2732558 |
| ENSG00000111602 | 0.13772455 |            | 0.13772455 |             |             |           |           |
| ENSG00000174013 |            | 0.26969697 |            | 0.26969697  |             |           | 0.3928571 |
| ENSG00000172318 | 0.19161677 |            | 0.19161677 |             | 0.470238095 | 0.3928571 |           |
| ENSG00000198646 | 0.29775281 | 0.13939394 | 0.29775281 | 0.139393939 | 0.455555556 | 0.3333333 | 0.1337209 |
| ENSG00000100376 | 0.09580838 | 0.46363636 | 0.09580838 | 0.463636364 | 0.411111111 | 0.4431818 | 0.494186  |
| ENSG00000204576 |            | 0.32727273 |            | 0.327272727 |             |           | 0.255814  |
| ENSG00000184047 | 0.23353293 | 0.43597561 | 0.23353293 | 0.43597561  | 0.273809524 | 0.3313953 | 0.2616279 |
| ENSG00000182158 |            | 0.34545455 |            | 0.345454545 |             |           | 0.4709302 |
| ENSG00000222047 |            |            |            |             |             |           | 0.0523256 |
| ENSG00000168675 | 0.38202247 | 0.22121212 | 0.38202247 | 0.221212121 | 0.232142857 | 0.1802326 | 0.4186047 |
| ENSG00000065357 | 0.07784431 | 0.22727273 | 0.07784431 | 0.227272727 | 0.11627907  | 0.1046512 | 0.1309524 |
| ENSG00000171603 |            | 0.05454545 |            | 0.054545455 |             |           | 0.2848837 |
| ENSG00000165526 |            | 0.24545455 |            | 0.245454545 |             |           | 0.1569767 |
| ENSG00000163635 |            | 0.36060606 |            | 0.360606061 |             |           | 0.4764706 |
| ENSG00000105865 |            | 0.47272727 |            | 0.472727273 |             |           | 0.4011628 |
| ENSG00000153561 |            | 0.30246914 |            | 0.302469136 |             |           | 0.0697674 |
| ENSG00000079246 | 0.19879518 | 0.10606061 | 0.19879518 | 0.106060606 | 0.297619048 | 0.3411765 | 0.1294118 |
| ENSG00000065526 | 0.05389222 | 0.0969697  | 0.05389222 | 0.096969697 | 0.053571429 |           | 0.2674419 |
| ENSG00000187642 |            |            |            |             |             |           | 0.4058824 |
| ENSG00000051128 | 0.09580838 |            | 0.09580838 |             | 0.43902439  | 0.3294118 |           |
| ENSG00000173848 | 0.15189873 | 0.35757576 | 0.15189873 | 0.357575758 | 0.179487179 | 0.0921053 | 0.3139535 |
| ENSG00000156521 |            | 0.37195122 |            | 0.37195122  |             |           |           |
| ENSG00000089022 | 0.31024096 |            | 0.31024096 |             | 0.470238095 | 0.4883721 |           |
| ENSG00000197410 |            |            |            |             | 0.144444444 | 0.0909091 |           |
| ENSG00000005483 | 0.39820359 | 0.13636364 | 0.39820359 | 0.136363636 | 0.369047619 | 0.244186  | 0.244186  |
| ENSG00000112182 | 0.08383234 | 0.45757576 | 0.08383234 | 0.457575758 | 0.321428571 | 0.4302326 | 0.4069767 |
| ENSG00000204961 | 0.25       | 0.21835443 | 0.25       | 0.21835443  | 0.482142857 | 0.4941176 | 0.1162791 |
| ENSG00000137251 | 0.10778443 | 0.325      | 0.10778443 | 0.325       |             |           | 0.1569767 |
| ENSG00000179674 |            |            |            |             | 0.327380952 | 0.2732558 |           |
| ENSG00000128285 | 0.45508982 | 0.47560976 | 0.45508982 | 0.475609756 |             |           | 0.1686047 |
| ENSG00000162601 |            | 0.43333333 |            | 0.433333333 |             |           | 0.4069767 |
| ENSG00000241635 |            | 0.22777778 |            | 0.227777778 |             |           | 0.1590909 |
| ENSG00000169194 |            | 0.22256098 |            | 0.222560976 |             |           | 0.2848837 |
| ENSG00000052802 | 0.29041916 |            | 0.29041916 |             | 0.172619048 | 0.1744186 |           |
| ENSG00000129691 |            |            |            |             | 0.265060241 | 0.2906977 | 0.2727273 |
| ENSG00000243244 |            | 0.41818182 |            | 0.418181818 |             |           | 0.494186  |
| ENSG00000050165 |            | 0.06969697 |            | 0.06969697  |             |           |           |
| ENSG00000087884 |            | 0.25151515 |            | 0.251515152 |             |           | 0.1104651 |
| ENSG00000146963 |            | 0.20555556 |            | 0.205555556 |             |           | 0.2093023 |
| ENSG00000175203 |            | 0.16969697 |            | 0.16969697  |             |           | 0.3662791 |
| ENSG00000164078 |            | 0.47878788 |            | 0.478787879 |             |           | 0.1918605 |
| ENSG00000159399 |            | 0.48484848 |            | 0.484848485 |             |           | 0.2965116 |
| ENSG00000182923 | 0.41017964 | 0.29393939 | 0.41017964 | 0.293939394 | 0.18452381  | 0.1918605 | 0.2209302 |

|                        |            |             |             |           |           |
|------------------------|------------|-------------|-------------|-----------|-----------|
| <b>ENSG00000170852</b> | 0.37575758 | 0.375757576 | 0.285714286 | 0.4127907 | 0.4127907 |
| <b>ENSG00000239961</b> | 0.12804878 | 0.12804878  |             | 0.0777778 |           |
| <b>ENSG00000220256</b> | 0.41768293 | 0.417682927 |             | 0.4476744 |           |
| <b>ENSG00000178803</b> | 0.38509317 | 0.385093168 |             | 0.4166667 |           |
| <b>ENSG00000131725</b> | 0.08383234 | 0.08383234  | 0.380952381 | 0.4244186 |           |
| <b>ENSG00000119509</b> | 0.44242424 | 0.442424242 | 0.380952381 | 0.2848837 | 0.0529412 |

---
