# Supplementary material for: Insights into the regulation of human CNV-miRNAs from the view of their target genes
Source: PubMed Central journal article supplement (PMC3582595; doi:10.1186/1471-2164-13-707), 2012-12-18
Supplement: 1471-2164-13-707-S6.pdf [file 1471-2164-13-707-S6.pdf]

| Ensembl Gene ID | YRI vs. CEU | YRI vs. CHB | YRI vs. JPT | CEU vs. CHB | CEU vs. JPT | CHB vs. JPT |
|-----------------|-------------|-------------|-------------|-------------|-------------|-------------|
| ENSG00000197969 |             |             |             |             |             | yes         |
| ENSG00000051596 |             | yes         | yes         | yes         | yes         |             |
| ENSG00000135750 | yes         |             |             | yes         | yes         |             |
| ENSG00000057663 |             |             |             |             |             | yes         |
| ENSG00000182511 | yes         |             |             | yes         | yes         |             |
| ENSG00000164164 |             | yes         |             |             |             |             |
| ENSG00000188290 | yes         | yes         | yes         | yes         | yes         |             |
| ENSG00000135919 |             |             |             | yes         | yes         |             |
| ENSG00000166548 |             | yes         | yes         |             | yes         |             |
| ENSG00000105701 |             |             |             |             |             | yes         |
| ENSG00000169087 |             |             |             |             | yes         |             |
| ENSG00000152684 |             |             | yes         |             |             |             |
| ENSG00000178860 | yes         |             |             | yes         |             |             |
| ENSG00000157216 |             | yes         |             |             |             | yes         |
| ENSG00000134452 |             | yes         |             |             |             |             |
| ENSG00000203883 | yes         | yes         |             | yes         | yes         | yes         |
| ENSG00000175130 |             |             | yes         |             |             | yes         |
| ENSG00000142539 |             | yes         |             | yes         |             | yes         |
| ENSG00000008853 |             | yes         |             |             |             |             |
| ENSG00000126561 |             |             |             | yes         |             |             |
| ENSG00000176978 |             | yes         |             | yes         |             | yes         |
| ENSG00000177370 |             |             | yes         |             | yes         | yes         |
| ENSG00000124575 |             |             |             |             | yes         | yes         |
| ENSG00000131724 |             |             | yes         |             | yes         | yes         |
| ENSG00000158710 |             | yes         |             | yes         |             | yes         |
| ENSG00000171867 |             |             |             |             | yes         |             |
| ENSG00000103005 |             |             |             | yes         | yes         |             |
| ENSG00000184408 |             |             | yes         |             |             | yes         |
| ENSG00000168564 | yes         |             |             | yes         |             |             |
| ENSG00000100211 |             |             |             |             |             | yes         |
| ENSG00000129128 |             |             | yes         |             |             | yes         |
| ENSG00000131196 |             |             |             | yes         | yes         |             |
| ENSG00000175220 |             |             |             | yes         |             |             |
| ENSG00000196700 |             |             |             |             |             | yes         |
| ENSG00000168283 |             |             |             | yes         | yes         |             |
| ENSG00000204165 | yes         |             |             | yes         | yes         |             |
| ENSG00000117394 |             |             | yes         |             |             |             |
| ENSG00000114650 |             | yes         |             |             |             | yes         |
| ENSG00000213190 | yes         | yes         |             |             |             | yes         |
| ENSG00000165322 |             |             |             |             |             | yes         |
| ENSG00000136161 |             | yes         | yes         |             |             |             |
| ENSG00000034510 | yes         |             |             |             | yes         |             |
| ENSG00000089639 |             |             |             |             |             | yes         |
| ENSG00000141956 |             | yes         | yes         |             |             |             |
| ENSG00000187608 | yes         |             |             |             | yes         |             |
| ENSG00000141576 |             |             |             | yes         | yes         |             |
| ENSG00000038358 |             |             |             |             |             | yes         |
| ENSG00000163131 |             |             |             | yes         |             |             |
| ENSG00000188677 |             | yes         | yes         | yes         | yes         | yes         |
| ENSG00000114405 |             |             |             |             | yes         | yes         |
| ENSG00000137628 |             | yes         |             |             |             | yes         |

|                 |     |     |     |     |     |     |
|-----------------|-----|-----|-----|-----|-----|-----|
| ENSG00000170581 | yes |     |     |     |     |     |
| ENSG00000011422 |     | yes |     | yes | yes |     |
| ENSG00000122515 | yes |     |     | yes | yes |     |
| ENSG00000102805 | yes |     |     |     |     |     |
| ENSG00000138623 | yes |     | yes | yes |     | yes |
| ENSG00000213015 |     |     | yes |     |     |     |
| ENSG00000081052 | yes | yes | yes |     |     |     |
| ENSG00000163607 |     |     | yes |     |     |     |
| ENSG00000100600 | yes |     |     | yes | yes |     |
| ENSG00000109323 | yes |     | yes | yes |     | yes |
| ENSG00000149179 |     |     |     |     |     | yes |
| ENSG00000142089 | yes |     |     | yes | yes |     |
| ENSG00000170819 |     | yes | yes | yes |     |     |
| ENSG00000196664 |     |     | yes |     | yes |     |
| ENSG00000013364 |     |     |     |     |     | yes |
| ENSG00000135148 | yes |     |     | yes | yes |     |
| ENSG00000184709 |     | yes |     | yes |     | yes |
| ENSG00000168264 |     |     |     |     |     | yes |
| ENSG00000108576 |     | yes | yes | yes | yes | yes |
| ENSG00000155846 |     |     |     |     |     | yes |
| ENSG00000198089 | yes |     |     | yes | yes |     |
| ENSG00000243251 | yes |     |     |     | yes |     |
| ENSG00000161011 |     |     | yes | yes | yes | yes |
| ENSG00000197978 |     |     |     |     |     | yes |
| ENSG00000155760 |     |     |     |     | yes |     |
| ENSG00000133026 | yes |     |     | yes | yes |     |
| ENSG00000010810 |     | yes |     |     |     |     |
| ENSG00000135697 | yes |     |     | yes | yes |     |
| ENSG00000065154 |     | yes | yes |     |     |     |
| ENSG00000167965 |     |     |     |     |     | yes |
| ENSG00000183941 |     |     | yes |     |     | yes |
| ENSG00000197238 |     |     |     |     |     | yes |
| ENSG00000187796 |     |     |     |     | yes |     |
| ENSG00000087086 |     |     |     |     | yes |     |
| ENSG00000143344 | yes | yes | yes |     |     |     |
| ENSG00000141522 |     |     |     |     |     | yes |
| ENSG00000169026 | yes |     |     |     | yes |     |
| ENSG00000124429 | yes |     |     | yes | yes |     |
| ENSG00000124126 |     |     |     |     |     | yes |
| ENSG00000125755 |     | yes |     | yes |     | yes |
| ENSG00000111676 |     |     |     |     |     | yes |
| ENSG00000155465 |     | yes | yes | yes | yes |     |
| ENSG00000134882 | yes |     | yes |     |     |     |
| ENSG00000140564 |     |     |     |     |     | yes |
| ENSG00000003249 | yes |     | yes | yes |     | yes |
| ENSG00000115904 |     | yes | yes |     |     |     |
| ENSG00000173915 | yes | yes | yes |     |     |     |
| ENSG00000164237 |     |     |     |     |     | yes |
| ENSG00000123636 |     |     |     |     | yes | yes |
| ENSG00000213240 |     | yes |     |     |     | yes |
| ENSG00000141293 |     | yes | yes |     |     |     |
| ENSG00000115963 | yes |     |     | yes | yes |     |
| ENSG00000154642 |     |     | yes |     |     | yes |
| ENSG00000178567 | yes |     |     | yes | yes |     |

|                 |     |     |     |     |     |     |
|-----------------|-----|-----|-----|-----|-----|-----|
| ENSG00000141378 |     |     | yes |     |     |     |
| ENSG00000099337 |     |     | yes | yes | yes | yes |
| ENSG00000090376 |     |     |     |     |     | yes |
| ENSG00000131153 | yes |     | yes |     |     |     |
| ENSG00000138771 | yes |     | yes |     | yes | yes |
| ENSG00000205339 | yes |     |     |     |     |     |
| ENSG00000174130 |     | yes | yes |     |     |     |
| ENSG00000127084 | yes |     | yes | yes | yes | yes |
| ENSG00000164330 | yes |     |     | yes |     | yes |
| ENSG00000178878 |     |     | yes |     |     | yes |
| ENSG00000160285 |     |     |     |     |     | yes |
| ENSG00000197279 |     |     | yes |     |     | yes |
| ENSG00000136026 |     | yes | yes |     |     |     |
| ENSG00000168630 |     |     |     |     | yes |     |
| ENSG00000124570 |     | yes | yes | yes | yes |     |
| ENSG00000116922 | yes |     |     |     |     |     |
| ENSG00000100300 | yes |     |     | yes | yes | yes |
| ENSG00000138758 | yes |     |     | yes | yes |     |
| ENSG00000084636 |     | yes |     |     |     | yes |
| ENSG00000188313 |     | yes |     | yes |     | yes |
| ENSG00000184887 |     |     |     | yes |     |     |
| ENSG00000172578 |     | yes | yes |     | yes |     |
| ENSG00000181938 | yes |     |     |     |     |     |
| ENSG00000213366 | yes |     |     | yes |     | yes |
| ENSG00000132471 | yes |     |     | yes |     | yes |
| ENSG00000181019 | yes |     |     | yes |     |     |
| ENSG00000176381 |     |     | yes |     | yes | yes |
| ENSG00000119242 |     | yes | yes |     |     | yes |
| ENSG00000198561 |     | yes |     |     |     |     |
| ENSG00000008710 |     |     |     |     |     | yes |
| ENSG00000170632 | yes | yes | yes |     |     |     |
| ENSG00000112679 | yes | yes | yes |     |     |     |
| ENSG00000111801 | yes |     |     | yes | yes |     |
| ENSG00000197943 | yes |     |     |     | yes |     |
| ENSG00000125505 |     |     |     |     |     | yes |
| ENSG00000007237 |     | yes | yes |     | yes | yes |
| ENSG00000213341 | yes |     |     |     |     |     |
| ENSG00000120129 |     | yes |     | yes |     | yes |
| ENSG00000142784 |     |     |     |     |     | yes |
| ENSG00000159335 | yes |     |     | yes |     | yes |
| ENSG00000165188 |     |     |     | yes | yes |     |
| ENSG00000154864 | yes |     |     | yes | yes |     |
| ENSG00000142235 | yes | yes | yes | yes | yes |     |
| ENSG00000013503 | yes |     |     | yes |     |     |
| ENSG00000117322 | yes | yes |     | yes | yes | yes |
| ENSG00000101665 |     |     |     |     |     | yes |
| ENSG00000118508 |     |     |     | yes | yes |     |
| ENSG00000128274 |     | yes | yes |     | yes | yes |
| ENSG00000126012 |     |     |     | yes |     | yes |
| ENSG00000164742 | yes |     |     | yes | yes |     |
| ENSG00000104960 |     |     |     |     |     | yes |
| ENSG00000102962 |     | yes | yes |     |     |     |
| ENSG00000173545 |     |     |     |     |     | yes |
| ENSG00000128272 |     | yes |     |     |     |     |

|                 |     |     |     |     |     |     |
|-----------------|-----|-----|-----|-----|-----|-----|
| ENSG00000184164 |     | yes | yes |     |     |     |
| ENSG00000063245 |     |     |     | yes |     | yes |
| ENSG00000134954 |     |     |     |     |     | yes |
| ENSG00000017427 |     |     |     | yes | yes |     |
| ENSG00000100196 |     |     | yes |     | yes |     |
| ENSG00000110987 |     |     |     |     | yes |     |
| ENSG00000125148 |     |     | yes |     | yes | yes |
| ENSG00000114480 |     | yes |     |     |     | yes |
| ENSG00000169245 |     | yes | yes | yes | yes |     |
| ENSG00000184060 |     | yes | yes |     | yes |     |
| ENSG00000106025 |     |     |     | yes | yes |     |
| ENSG00000135898 |     |     |     | yes |     |     |
| ENSG00000186193 |     |     |     | yes |     |     |
| ENSG00000142751 |     |     |     |     |     | yes |
| ENSG00000132612 |     |     |     |     |     | yes |
| ENSG00000070413 |     |     |     |     |     | yes |
| ENSG00000189060 |     |     | yes |     |     | yes |
| ENSG00000120709 |     |     |     |     |     | yes |
| ENSG00000123080 |     | yes | yes |     |     |     |
| ENSG00000132185 |     |     |     | yes |     | yes |
| ENSG00000189283 |     |     |     |     |     | yes |
| ENSG00000076662 | yes |     |     | yes |     |     |
| ENSG00000025039 |     | yes |     |     |     | yes |
| ENSG00000182359 |     |     |     | yes |     |     |
| ENSG00000178585 | yes |     |     | yes | yes |     |
| ENSG00000118513 | yes |     |     | yes | yes |     |
| ENSG00000119138 |     |     |     | yes | yes |     |
| ENSG00000105649 | yes | yes | yes | yes |     | yes |
| ENSG00000007312 |     | yes | yes |     | yes |     |
| ENSG00000139597 | yes |     |     | yes |     |     |
| ENSG00000172638 | yes |     |     | yes |     |     |
| ENSG00000151364 |     | yes | yes | yes | yes |     |
| ENSG00000136436 |     |     | yes |     |     |     |
| ENSG00000204160 |     |     |     | yes |     | yes |
| ENSG00000129250 |     |     |     |     |     | yes |
| ENSG00000143870 |     |     |     |     |     | yes |
| ENSG00000096872 |     |     |     |     | yes |     |
| ENSG00000174996 |     |     |     |     | yes |     |
| ENSG00000128590 |     |     | yes |     |     |     |
| ENSG00000149527 | yes | yes | yes |     |     |     |
| ENSG00000104894 | yes |     |     | yes |     |     |
| ENSG00000119669 |     | yes |     |     |     |     |
| ENSG00000198042 |     | yes | yes |     |     |     |
| ENSG00000131408 | yes |     |     | yes |     |     |
| ENSG00000173480 |     |     |     | yes |     |     |
| ENSG00000105851 |     | yes |     | yes |     |     |
| ENSG00000122707 |     |     |     |     |     | yes |
| ENSG00000143622 | yes |     |     | yes | yes |     |
| ENSG00000139679 | yes |     | yes | yes | yes | yes |
| ENSG00000186834 | yes |     |     | yes |     |     |
| ENSG00000085733 | yes |     |     |     | yes | yes |
| ENSG00000128731 | yes | yes | yes |     |     |     |
| ENSG00000159200 | yes |     |     | yes | yes |     |
| ENSG00000170608 | yes |     |     | yes | yes |     |

|                 |     |     |     |     |     |     |
|-----------------|-----|-----|-----|-----|-----|-----|
| ENSG00000102595 |     |     |     | yes |     |     |
| ENSG00000214530 |     |     |     |     |     | yes |
| ENSG00000069702 | yes |     |     |     |     |     |
| ENSG00000101336 |     | yes | yes | yes | yes |     |
| ENSG00000116299 |     |     | yes |     |     | yes |
| ENSG00000174004 |     | yes |     | yes |     |     |
| ENSG00000108753 | yes | yes |     | yes | yes | yes |
| ENSG00000177683 |     |     |     | yes | yes |     |
| ENSG00000115738 |     |     | yes |     | yes | yes |
| ENSG00000186111 |     |     | yes |     |     | yes |
| ENSG00000076641 |     | yes | yes |     |     |     |
| ENSG00000211455 |     | yes |     |     |     | yes |
| ENSG00000107679 | yes |     |     |     | yes |     |
| ENSG00000048405 |     |     | yes |     |     |     |
| ENSG00000162894 | yes | yes |     |     |     |     |
| ENSG00000196152 |     |     |     |     | yes |     |
| ENSG00000089692 | yes | yes |     | yes | yes | yes |
| ENSG00000090530 | yes | yes | yes | yes | yes |     |
| ENSG00000119986 |     |     |     |     | yes |     |
| ENSG00000006118 |     | yes |     | yes |     |     |
| ENSG00000188811 |     |     |     |     |     | yes |
| ENSG00000125740 |     | yes | yes |     |     |     |
| ENSG00000148229 |     |     | yes | yes |     | yes |
| ENSG00000122122 |     |     |     |     |     | yes |
| ENSG00000137502 |     |     |     |     | yes |     |
| ENSG00000250722 |     |     |     |     | yes |     |
| ENSG00000143297 | yes |     |     | yes | yes |     |
| ENSG00000106397 |     |     |     | yes |     |     |
| ENSG00000104064 |     |     | yes |     |     |     |
| ENSG00000102096 | yes |     |     | yes | yes |     |
| ENSG00000168061 |     |     |     |     | yes | yes |
| ENSG00000149328 |     |     | yes |     |     | yes |
| ENSG00000163823 |     | yes | yes | yes | yes |     |
| ENSG00000132199 |     | yes |     |     |     | yes |
| ENSG00000108381 | yes |     |     | yes | yes |     |
| ENSG00000176715 |     | yes | yes | yes | yes | yes |
| ENSG00000103653 | yes |     |     |     |     |     |
| ENSG00000162739 | yes | yes | yes | yes |     |     |
| ENSG00000182118 |     | yes |     | yes | yes |     |
| ENSG00000134716 |     | yes |     |     |     |     |
| ENSG00000161277 | yes |     | yes | yes |     | yes |
| ENSG00000164733 |     | yes |     | yes | yes |     |
| ENSG00000212864 |     |     |     |     |     | yes |
| ENSG00000185420 |     |     |     |     |     | yes |
| ENSG00000166233 |     | yes | yes |     |     |     |
| ENSG00000159314 | yes |     |     | yes | yes |     |
| ENSG00000109534 |     |     | yes |     |     |     |
| ENSG00000119616 |     |     |     | yes |     |     |
| ENSG00000196544 |     | yes |     |     |     |     |
| ENSG00000140497 |     | yes |     |     |     |     |
| ENSG00000213054 |     | yes |     |     |     | yes |
| ENSG00000170430 | yes |     |     | yes | yes |     |
| ENSG00000167106 |     | yes | yes |     |     |     |
| ENSG00000237541 | yes | yes | yes | yes |     |     |

|                 |     |     |     |     |     |     |
|-----------------|-----|-----|-----|-----|-----|-----|
| ENSG00000127920 | yes | yes |     | yes | yes |     |
| ENSG00000119411 |     | yes | yes | yes | yes | yes |
| ENSG00000184678 | yes |     |     | yes | yes | yes |
| ENSG00000197102 |     |     |     |     | yes |     |
| ENSG00000167513 |     |     | yes |     |     | yes |
| ENSG00000177105 |     |     |     | yes |     |     |
| ENSG00000126261 | yes |     |     | yes |     |     |
| ENSG00000139998 |     | yes |     | yes |     | yes |
| ENSG00000116133 | yes |     |     | yes | yes |     |
| ENSG00000140650 | yes |     | yes |     |     |     |
| ENSG00000169136 | yes |     |     |     | yes |     |
| ENSG00000069493 | yes |     |     | yes | yes |     |
| ENSG00000166793 |     |     |     | yes | yes |     |
| ENSG00000169896 |     |     |     |     |     | yes |
| ENSG00000066336 |     |     | yes |     |     | yes |
| ENSG00000139266 |     |     |     | yes |     | yes |
| ENSG00000196374 |     |     | yes |     |     | yes |
| ENSG00000203811 |     |     | yes |     | yes | yes |
| ENSG00000144802 |     |     |     |     |     | yes |
| ENSG00000138795 | yes |     | yes | yes | yes | yes |
| ENSG00000104320 | yes | yes |     |     |     |     |
| ENSG00000035403 |     |     |     |     | yes |     |
| ENSG00000176087 |     |     |     |     |     | yes |
| ENSG00000121104 |     |     |     |     |     | yes |
| ENSG00000198113 | yes |     |     |     |     |     |
| ENSG00000055332 |     |     |     |     |     | yes |
| ENSG00000110324 |     |     |     | yes | yes |     |
| ENSG00000160124 | yes |     |     |     |     |     |
| ENSG00000111335 | yes |     |     | yes | yes |     |
| ENSG00000162066 |     |     |     | yes |     | yes |
| ENSG00000135638 |     |     | yes | yes | yes |     |
| ENSG00000003147 | yes | yes | yes |     |     |     |
| ENSG00000205020 | yes | yes | yes | yes | yes |     |
| ENSG00000185650 |     | yes | yes |     |     |     |
| ENSG00000159958 |     | yes |     | yes | yes |     |
| ENSG00000185527 | yes |     |     |     |     |     |
| ENSG00000198707 |     |     |     |     |     | yes |
| ENSG00000140297 |     | yes | yes |     |     |     |
| ENSG00000176171 | yes |     |     | yes | yes |     |
| ENSG00000121769 |     |     |     |     |     | yes |
| ENSG00000162511 |     | yes |     |     |     |     |
| ENSG00000197405 | yes |     |     | yes | yes |     |
| ENSG00000146223 |     |     |     |     |     | yes |
| ENSG00000157916 |     | yes |     |     |     |     |
| ENSG00000001561 |     |     |     |     |     | yes |
| ENSG00000130635 | yes | yes | yes | yes | yes |     |
| ENSG00000115267 |     |     |     | yes |     |     |
| ENSG00000137078 | yes |     |     | yes | yes |     |
| ENSG00000169188 |     |     |     |     |     | yes |
| ENSG00000162692 | yes | yes | yes | yes | yes | yes |
| ENSG00000163191 |     |     | yes |     |     | yes |
| ENSG00000071539 | yes | yes | yes |     |     |     |
| ENSG00000196584 |     |     |     |     |     | yes |
| ENSG00000105122 |     | yes |     |     |     | yes |

|                 |     |     |     |     |     |     |
|-----------------|-----|-----|-----|-----|-----|-----|
| ENSG00000172785 |     | yes |     |     |     |     |
| ENSG00000172893 |     |     |     |     |     | yes |
| ENSG00000023902 |     |     |     |     |     | yes |
| ENSG00000108771 | yes | yes | yes |     |     |     |
| ENSG00000080823 |     |     | yes |     |     |     |
| ENSG00000117091 | yes |     |     |     | yes |     |
| ENSG00000111052 | yes |     |     | yes | yes |     |
| ENSG00000094914 |     |     |     |     |     | yes |
| ENSG00000100321 |     | yes | yes | yes |     |     |
| ENSG00000070718 | yes |     |     |     | yes |     |
| ENSG00000091490 | yes |     | yes | yes | yes | yes |
| ENSG00000153721 |     | yes |     | yes | yes |     |
| ENSG00000164920 |     |     | yes |     | yes | yes |
| ENSG00000149054 | yes |     |     | yes |     |     |
| ENSG00000073605 | yes |     |     | yes |     |     |
| ENSG00000112576 | yes |     | yes |     |     | yes |
| ENSG00000198380 |     | yes | yes |     |     |     |
| ENSG00000150556 | yes | yes | yes | yes | yes | yes |
| ENSG00000075702 |     |     |     | yes | yes |     |
| ENSG00000197879 |     |     |     |     |     | yes |
| ENSG00000149428 |     |     |     |     |     | yes |
| ENSG00000177728 | yes |     |     | yes |     | yes |
| ENSG00000109436 |     | yes |     | yes |     | yes |
| ENSG00000092847 |     |     |     |     |     | yes |
| ENSG00000152558 |     |     |     |     |     | yes |
| ENSG00000102977 |     |     |     |     |     | yes |
| ENSG00000198003 | yes |     |     | yes | yes |     |
| ENSG00000145850 | yes | yes |     | yes | yes |     |
| ENSG00000188986 |     |     |     | yes |     | yes |
| ENSG00000118242 | yes |     |     | yes | yes |     |
| ENSG00000173875 |     |     |     |     |     | yes |
| ENSG00000125657 |     |     |     | yes |     | yes |
| ENSG00000137259 |     |     |     |     |     | yes |
| ENSG00000198301 |     |     | yes |     |     | yes |
| ENSG00000072571 |     |     |     | yes | yes |     |
| ENSG00000083845 |     |     |     |     |     | yes |
| ENSG00000235863 | yes |     |     |     |     |     |
| ENSG00000126264 | yes | yes |     |     | yes | yes |
| ENSG00000125124 |     |     | yes |     |     |     |
| ENSG00000112237 |     |     |     | yes |     | yes |
| ENSG00000186462 |     |     |     |     |     | yes |
| ENSG00000162517 |     |     |     |     |     | yes |
| ENSG00000132382 | yes |     |     |     |     |     |
| ENSG00000021355 | yes |     |     | yes | yes |     |
| ENSG00000138035 | yes |     |     |     |     |     |
| ENSG00000124831 |     | yes |     | yes |     | yes |
| ENSG00000100325 |     |     |     |     |     | yes |
| ENSG00000213203 |     | yes |     |     |     |     |
| ENSG00000165949 | yes |     |     | yes | yes |     |
| ENSG00000164896 |     |     |     |     |     | yes |
| ENSG00000130830 |     |     |     |     |     | yes |
| ENSG00000119004 | yes |     |     | yes |     |     |
| ENSG00000126461 |     |     |     |     |     | yes |
| ENSG0000004864  | yes |     |     |     | yes | yes |

|                 |     |     |     |     |     |     |
|-----------------|-----|-----|-----|-----|-----|-----|
| ENSG00000172115 | yes |     | yes | yes | yes |     |
| ENSG00000101337 |     |     |     |     |     | yes |
| ENSG00000105948 | yes |     |     |     | yes |     |
| ENSG00000131165 |     |     |     |     |     | yes |
| ENSG00000184260 |     |     |     |     | yes |     |
| ENSG00000133612 |     |     | yes |     |     | yes |
| ENSG00000184979 |     | yes | yes | yes |     |     |
| ENSG00000122223 | yes |     |     | yes | yes |     |
| ENSG00000100997 | yes | yes | yes |     |     |     |
| ENSG00000196126 | yes |     | yes | yes | yes | yes |
| ENSG00000095794 |     |     |     | yes |     |     |
| ENSG00000187266 |     |     |     |     |     | yes |
| ENSG00000081189 |     | yes |     |     |     |     |
| ENSG00000112305 |     |     |     |     |     | yes |
| ENSG00000104853 |     |     |     |     |     | yes |
| ENSG00000169122 |     |     |     | yes | yes |     |
| ENSG00000119943 |     |     | yes | yes | yes |     |
| ENSG00000185551 |     |     | yes |     | yes | yes |
| ENSG00000144674 | yes |     |     |     |     |     |
| ENSG00000169288 |     |     |     |     |     | yes |
| ENSG00000078142 |     |     |     |     |     | yes |
| ENSG00000159685 |     |     | yes |     | yes |     |
| ENSG00000167207 | yes |     |     | yes | yes |     |
| ENSG00000151491 | yes |     |     | yes | yes |     |
| ENSG00000197442 |     | yes | yes |     | yes |     |
| ENSG00000239264 | yes | yes |     |     |     | yes |
| ENSG00000171236 |     |     |     |     |     | yes |
| ENSG00000185090 |     | yes | yes | yes | yes |     |
| ENSG00000164985 |     |     |     |     | yes |     |
| ENSG00000125962 |     | yes |     |     |     |     |
| ENSG00000130592 |     |     | yes |     |     | yes |
| ENSG00000048740 |     |     |     |     |     | yes |
| ENSG00000198736 | yes |     |     | yes | yes |     |
| ENSG00000115694 |     | yes | yes |     |     |     |
| ENSG00000136111 | yes | yes | yes | yes | yes | yes |
| ENSG00000155307 |     |     |     |     |     | yes |
| ENSG00000131669 |     |     | yes |     | yes | yes |
| ENSG00000137965 |     |     |     | yes |     |     |
| ENSG00000196172 |     |     |     |     |     | yes |
| ENSG00000136261 | yes |     | yes |     |     |     |
| ENSG00000168528 | yes |     | yes | yes |     | yes |
| ENSG00000081059 | yes |     |     | yes | yes |     |
| ENSG00000102970 | yes | yes |     |     | yes | yes |
| ENSG00000125912 |     |     |     |     |     | yes |
| ENSG00000123143 |     |     |     |     |     | yes |
| ENSG00000169508 | yes |     | yes |     |     |     |
| ENSG00000196187 | yes |     |     | yes | yes |     |
| ENSG00000184232 |     | yes |     | yes | yes |     |
| ENSG00000138760 | yes | yes | yes | yes | yes |     |
| ENSG00000153048 | yes |     |     |     | yes | yes |
| ENSG00000156113 | yes |     | yes | yes | yes |     |
| ENSG00000066032 | yes |     |     | yes | yes |     |
| ENSG00000109861 | yes |     | yes | yes | yes | yes |
| ENSG00000165684 |     |     | yes |     |     |     |



|                 |     |     |     |     |     |     |
|-----------------|-----|-----|-----|-----|-----|-----|
| ENSG00000166689 |     |     | yes |     | yes |     |
| ENSG00000163162 | yes |     |     | yes | yes |     |
| ENSG00000196453 |     |     |     | yes |     | yes |
| ENSG00000123240 | yes |     |     |     | yes |     |
| ENSG00000121486 |     |     |     |     |     | yes |
| ENSG00000150637 |     |     |     |     |     | yes |
| ENSG00000154217 |     | yes |     | yes | yes | yes |
| ENSG00000131187 | yes |     |     | yes | yes |     |
| ENSG00000100721 | yes | yes |     |     | yes | yes |
| ENSG00000165655 |     | yes |     | yes | yes |     |
| ENSG00000145506 |     |     |     | yes |     | yes |
| ENSG00000048392 |     |     |     |     |     | yes |
| ENSG00000174373 |     |     |     |     | yes |     |
| ENSG00000166197 | yes |     | yes |     |     |     |
| ENSG00000177042 |     |     | yes |     |     |     |
| ENSG00000177674 | yes |     |     | yes |     | yes |
| ENSG00000177951 |     |     |     |     |     | yes |
| ENSG00000086967 |     | yes | yes |     |     |     |
| ENSG00000242265 | yes |     | yes |     | yes | yes |
| ENSG00000125844 |     | yes |     |     |     |     |
| ENSG00000179820 | yes |     |     | yes | yes |     |
| ENSG00000138587 |     |     |     |     |     | yes |
| ENSG00000110697 | yes |     |     | yes |     | yes |
| ENSG00000135521 | yes |     | yes |     |     |     |
| ENSG00000101439 |     |     | yes | yes | yes | yes |
| ENSG00000120992 |     |     |     | yes |     |     |
| ENSG00000196151 | yes |     | yes |     |     | yes |
| ENSG00000093167 |     |     | yes |     |     | yes |
| ENSG00000125246 | yes |     | yes |     |     |     |
| ENSG00000133106 | yes |     |     | yes | yes |     |
| ENSG00000168298 |     |     |     |     |     | yes |
| ENSG00000131467 | yes |     |     |     | yes |     |
| ENSG00000105953 |     |     |     |     |     | yes |
| ENSG00000130559 | yes |     |     |     |     |     |
| ENSG00000101445 |     | yes |     |     |     | yes |
| ENSG00000161939 |     |     |     |     |     | yes |
| ENSG00000197982 |     |     |     | yes |     | yes |
| ENSG00000176022 |     |     |     | yes |     |     |
| ENSG00000174749 | yes |     |     |     |     |     |
| ENSG00000068383 | yes |     |     | yes | yes | yes |
| ENSG00000122861 | yes |     |     |     | yes | yes |
| ENSG00000103769 |     |     |     |     |     | yes |
| ENSG00000101236 | yes |     |     | yes | yes |     |
| ENSG00000120162 |     |     |     |     |     | yes |
| ENSG00000124491 | yes |     |     | yes | yes |     |
| ENSG00000168734 |     |     |     |     | yes |     |
| ENSG00000110917 |     |     |     |     |     | yes |
| ENSG00000146376 |     |     |     | yes |     | yes |
| ENSG00000123136 |     |     |     |     |     | yes |
| ENSG00000010244 | yes |     |     | yes |     |     |
| ENSG00000114767 |     | yes |     |     |     |     |
| ENSG00000166317 | yes | yes |     |     | yes | yes |
| ENSG00000123095 |     |     | yes |     |     |     |
| ENSG00000168495 |     |     |     | yes |     |     |

|                 |     |     |     |     |     |     |
|-----------------|-----|-----|-----|-----|-----|-----|
| ENSG0000009790  |     | yes | yes |     |     |     |
| ENSG00000100285 |     | yes | yes | yes | yes |     |
| ENSG00000124588 | yes | yes | yes |     |     |     |
| ENSG00000099622 |     |     |     | yes |     |     |
| ENSG00000165891 | yes |     |     | yes | yes |     |
| ENSG00000126016 | yes |     | yes | yes | yes | yes |
| ENSG00000171617 |     | yes | yes | yes | yes |     |
| ENSG00000101846 |     |     |     | yes | yes |     |
| ENSG00000198033 |     |     |     |     | yes | yes |
| ENSG00000148468 |     |     |     |     |     | yes |
| ENSG00000147872 | yes |     |     |     |     |     |
| ENSG00000011198 | yes |     |     |     | yes |     |
| ENSG00000188958 |     |     |     |     | yes |     |
| ENSG00000100304 | yes | yes | yes | yes | yes |     |
| ENSG00000153140 |     |     |     |     |     | yes |
| ENSG00000115165 | yes |     |     | yes | yes |     |
| ENSG00000111215 |     | yes | yes |     |     |     |
| ENSG00000155629 | yes |     |     |     |     |     |
| ENSG00000126107 |     |     |     |     |     | yes |
| ENSG00000095906 |     | yes |     |     |     |     |
| ENSG00000180543 |     | yes | yes |     |     |     |
| ENSG00000198498 |     | yes |     |     |     |     |
| ENSG00000134061 | yes |     |     |     |     |     |
| ENSG00000090238 |     |     | yes |     |     |     |
| ENSG00000105281 |     |     | yes |     |     | yes |
| ENSG00000186652 |     | yes |     |     |     |     |
| ENSG00000070831 | yes |     |     | yes | yes |     |
| ENSG00000162441 | yes | yes | yes |     |     |     |
| ENSG00000085514 |     |     |     |     |     | yes |
| ENSG00000135480 | yes |     |     |     | yes |     |
| ENSG00000100364 |     |     |     |     |     | yes |
| ENSG00000196923 |     |     |     |     |     | yes |
| ENSG00000179409 |     |     |     |     |     | yes |
| ENSG00000181031 |     |     |     |     | yes |     |
| ENSG00000110446 |     | yes |     | yes |     |     |
| ENSG00000141458 |     |     |     |     |     | yes |
| ENSG00000154277 | yes |     | yes | yes | yes | yes |
| ENSG00000116455 |     |     |     | yes |     |     |
| ENSG00000103657 |     | yes |     | yes |     | yes |
| ENSG00000198846 |     |     | yes |     |     |     |
| ENSG00000180611 | yes | yes | yes | yes |     | yes |
| ENSG00000168952 | yes |     |     | yes | yes | yes |
| ENSG00000085117 |     |     |     | yes |     |     |
| ENSG00000149231 |     |     |     |     | yes | yes |
| ENSG00000100083 |     |     | yes |     |     | yes |
| ENSG00000071967 | yes |     | yes |     | yes | yes |
| ENSG00000126353 | yes | yes |     | yes | yes |     |
| ENSG00000102221 | yes |     |     | yes | yes |     |
| ENSG00000086758 |     |     |     |     |     | yes |
| ENSG00000185222 | yes | yes | yes |     |     |     |
| ENSG00000167925 |     |     |     |     |     | yes |
| ENSG00000166598 |     |     |     |     |     | yes |
| ENSG00000167476 | yes | yes |     |     | yes | yes |
| ENSG00000132341 | yes |     |     | yes | yes |     |

|                 |     |     |     |     |     |     |
|-----------------|-----|-----|-----|-----|-----|-----|
| ENSG00000144746 |     | yes |     | yes |     |     |
| ENSG00000111332 |     |     |     | yes |     |     |
| ENSG00000106105 |     |     |     |     |     | yes |
| ENSG00000167414 |     | yes |     | yes | yes |     |
| ENSG00000139193 |     | yes |     |     |     | yes |
| ENSG00000064787 |     |     |     |     | yes |     |
| ENSG00000105963 | yes |     | yes | yes | yes |     |
| ENSG00000137269 |     |     |     |     |     | yes |
| ENSG00000101255 | yes |     |     | yes |     | yes |
| ENSG00000110328 |     | yes |     |     |     |     |
| ENSG00000106392 |     |     |     | yes |     |     |
| ENSG00000111962 | yes |     |     | yes | yes | yes |
| ENSG00000168772 | yes | yes |     | yes | yes | yes |
| ENSG00000154930 |     | yes |     |     |     | yes |
| ENSG00000162430 | yes | yes |     | yes | yes | yes |
| ENSG00000198624 |     | yes |     | yes |     |     |
| ENSG00000099875 | yes | yes |     | yes | yes | yes |
| ENSG00000127507 |     | yes |     | yes | yes |     |
| ENSG00000071073 |     |     |     | yes | yes |     |
| ENSG00000155438 | yes |     |     | yes |     |     |
| ENSG00000174946 | yes |     |     | yes | yes |     |
| ENSG00000072210 |     |     |     | yes |     |     |
| ENSG00000153395 |     |     |     | yes |     |     |
| ENSG00000143554 |     | yes |     |     |     |     |
| ENSG00000108797 |     |     |     |     |     | yes |
| ENSG00000177192 | yes |     |     | yes |     | yes |
| ENSG00000184602 | yes |     |     |     | yes |     |
| ENSG00000184674 |     | yes |     | yes | yes |     |
| ENSG00000143013 | yes |     |     |     | yes | yes |
| ENSG00000107562 | yes |     |     | yes | yes |     |
| ENSG00000166821 |     |     |     | yes |     |     |
| ENSG00000060982 | yes |     |     | yes | yes |     |
| ENSG00000121236 |     | yes |     | yes |     |     |
| ENSG00000143368 |     |     |     |     |     | yes |
| ENSG00000072756 | yes | yes |     | yes |     |     |
| ENSG00000122643 | yes |     |     | yes | yes |     |
| ENSG00000206503 |     | yes |     | yes | yes | yes |
| ENSG00000167748 | yes | yes |     | yes | yes | yes |
| ENSG00000114742 |     |     |     | yes |     |     |
| ENSG00000128271 |     |     |     | yes |     | yes |
| ENSG00000105085 |     |     |     | yes |     |     |
| ENSG00000103495 |     |     |     |     |     | yes |
| ENSG00000079931 |     | yes |     | yes | yes | yes |
| ENSG00000086666 |     | yes |     | yes | yes | yes |
| ENSG00000134001 | yes | yes |     | yes | yes |     |
| ENSG00000213145 |     |     |     |     | yes |     |
| ENSG00000108848 |     |     |     | yes |     | yes |
| ENSG00000158828 |     |     |     | yes | yes |     |
| ENSG00000109466 |     |     |     |     |     | yes |
| ENSG00000116649 |     |     |     | yes |     |     |
| ENSG00000163563 | yes |     |     | yes | yes |     |
| ENSG00000073969 |     |     |     | yes | yes |     |
| ENSG00000179344 |     | yes |     | yes |     |     |
| ENSG00000101361 | yes |     |     | yes |     | yes |

|                 |     |     |     |     |     |     |
|-----------------|-----|-----|-----|-----|-----|-----|
| ENSG00000116574 |     |     |     |     |     | yes |
| ENSG00000055483 | yes | yes | yes |     |     |     |
| ENSG00000180011 | yes | yes | yes |     |     |     |
| ENSG00000154451 | yes |     |     | yes | yes |     |
| ENSG00000136235 |     | yes |     |     |     |     |
| ENSG00000162144 |     | yes |     | yes | yes |     |
| ENSG00000116793 |     |     |     |     |     | yes |
| ENSG00000171503 |     | yes | yes |     |     |     |
| ENSG00000167397 | yes |     |     | yes |     |     |
| ENSG00000085511 |     | yes |     | yes |     |     |
| ENSG00000132646 | yes |     | yes | yes | yes |     |
| ENSG00000224051 |     |     |     | yes |     | yes |
| ENSG00000125637 | yes |     | yes | yes |     | yes |
| ENSG00000187514 |     |     |     |     |     | yes |
| ENSG00000127990 | yes |     | yes | yes | yes | yes |
| ENSG00000129353 | yes |     | yes | yes | yes | yes |
| ENSG00000007038 |     | yes | yes |     |     |     |
| ENSG00000198860 | yes |     |     | yes |     |     |
| ENSG00000153162 |     | yes |     |     |     |     |
| ENSG00000139116 | yes |     |     | yes | yes |     |
| ENSG00000116874 | yes |     |     |     |     |     |
| ENSG00000136717 | yes |     |     | yes | yes |     |
| ENSG00000133302 |     |     |     |     |     | yes |
| ENSG00000113140 |     | yes | yes | yes |     | yes |
| ENSG00000151948 | yes | yes | yes | yes | yes |     |
| ENSG00000158717 | yes |     |     | yes | yes |     |
| ENSG00000205571 | yes | yes | yes |     |     |     |
| ENSG00000173812 |     |     |     |     |     | yes |
| ENSG00000136738 |     | yes |     |     |     |     |
| ENSG00000117519 | yes | yes |     | yes | yes | yes |
| ENSG00000138764 |     |     | yes |     |     |     |
| ENSG00000139697 | yes |     |     |     |     |     |
| ENSG00000168994 |     |     | yes |     | yes | yes |
| ENSG00000075618 | yes |     | yes | yes |     | yes |
| ENSG00000110107 |     |     |     |     |     | yes |
| ENSG00000143333 |     |     |     |     | yes |     |
| ENSG00000118655 | yes |     |     |     | yes |     |
| ENSG00000122557 |     |     |     |     |     | yes |
| ENSG00000075234 | yes | yes | yes |     |     |     |
| ENSG00000196313 |     |     |     | yes |     | yes |
| ENSG00000143179 |     | yes | yes |     |     |     |
| ENSG00000198931 |     | yes |     | yes |     | yes |
| ENSG00000119922 |     | yes |     | yes |     | yes |
| ENSG00000115239 | yes |     |     | yes | yes |     |
| ENSG00000007541 |     |     | yes | yes |     | yes |
| ENSG00000133114 |     |     |     |     |     | yes |
| ENSG00000172301 | yes |     |     |     |     |     |
| ENSG00000004478 |     | yes |     |     |     |     |
| ENSG00000095015 | yes |     |     | yes |     |     |
| ENSG00000136522 | yes |     |     |     |     |     |
| ENSG00000118496 | yes |     |     |     |     |     |
| ENSG00000156265 |     |     |     |     |     | yes |
| ENSG00000108523 |     | yes | yes |     |     |     |
| ENSG00000168938 |     |     |     | yes |     | yes |

|                 |     |     |     |     |     |     |
|-----------------|-----|-----|-----|-----|-----|-----|
| ENSG00000137752 |     |     |     |     |     | yes |
| ENSG00000164978 |     | yes |     |     |     |     |
| ENSG00000172354 |     |     |     |     |     | yes |
| ENSG00000014164 |     |     |     |     |     | yes |
| ENSG00000164047 | yes | yes |     |     |     | yes |
| ENSG00000129003 |     |     |     |     |     | yes |
| ENSG00000165474 |     |     | yes |     |     |     |
| ENSG0000002586  |     | yes | yes |     |     |     |
| ENSG00000197822 |     |     |     |     | yes |     |
| ENSG00000164054 | yes |     |     | yes | yes |     |
| ENSG00000162976 |     |     |     | yes |     |     |
| ENSG00000091844 |     |     | yes |     | yes |     |
| ENSG00000166896 | yes | yes | yes |     |     |     |
| ENSG00000153064 |     | yes | yes | yes | yes |     |
| ENSG00000196743 |     | yes | yes |     |     |     |
| ENSG00000145220 |     | yes | yes |     |     |     |
| ENSG00000109181 |     | yes | yes | yes | yes |     |
| ENSG00000183386 |     |     |     |     |     | yes |
| ENSG00000186603 |     |     |     |     |     | yes |
| ENSG00000198925 |     |     |     | yes |     | yes |
| ENSG00000164904 | yes | yes | yes |     | yes |     |
| ENSG00000088992 | yes | yes |     | yes | yes | yes |
| ENSG00000111845 | yes | yes | yes |     |     |     |
| ENSG00000099246 | yes |     | yes |     |     |     |
| ENSG00000138166 | yes | yes | yes | yes | yes |     |
| ENSG00000178950 |     |     |     |     |     | yes |
| ENSG00000154832 | yes | yes |     |     | yes | yes |
| ENSG00000170522 |     |     |     | yes | yes |     |
| ENSG00000105568 |     |     |     |     |     | yes |
| ENSG00000173566 | yes |     | yes | yes |     | yes |
| ENSG00000182985 |     | yes | yes | yes | yes | yes |
| ENSG00000132744 |     |     |     |     | yes | yes |
| ENSG00000173581 |     |     | yes |     |     | yes |
| ENSG00000167578 |     |     |     | yes |     | yes |
| ENSG00000229117 |     |     |     |     | yes | yes |
| ENSG00000232258 |     |     | yes |     | yes |     |
| ENSG00000166016 |     | yes | yes | yes |     |     |
| ENSG00000173327 |     |     |     |     |     | yes |
| ENSG00000111252 | yes | yes | yes |     |     |     |
| ENSG00000185201 | yes |     |     | yes | yes |     |
| ENSG00000101974 |     |     |     |     |     | yes |
| ENSG00000166451 |     | yes | yes |     |     |     |
| ENSG00000084073 | yes |     |     | yes |     |     |
| ENSG00000168610 | yes |     |     | yes | yes |     |
| ENSG00000172009 |     | yes |     | yes |     | yes |
| ENSG00000178971 | yes |     |     |     | yes |     |
| ENSG00000069399 | yes |     | yes | yes |     | yes |
| ENSG00000242550 |     | yes | yes | yes | yes | yes |
| ENSG00000141013 |     |     |     |     |     | yes |
| ENSG00000108179 |     |     | yes |     |     |     |
| ENSG00000197417 |     | yes | yes |     |     |     |
| ENSG00000116191 | yes |     |     |     | yes | yes |
| ENSG00000164924 | yes |     |     | yes | yes |     |
| ENSG00000127528 | yes |     |     |     |     |     |

|                 |     |     |     |     |     |     |
|-----------------|-----|-----|-----|-----|-----|-----|
| ENSG00000141179 |     | yes | yes |     |     |     |
| ENSG00000011304 |     |     |     |     |     | yes |
| ENSG00000048544 | yes | yes | yes |     |     |     |
| ENSG00000104856 |     |     |     | yes |     | yes |
| ENSG00000147679 |     |     |     |     |     | yes |
| ENSG00000165449 | yes | yes | yes |     |     |     |
| ENSG00000013374 | yes |     |     | yes | yes |     |
| ENSG00000165724 |     |     | yes |     |     |     |
| ENSG00000130429 | yes | yes | yes |     |     |     |
| ENSG00000071205 |     |     |     |     |     | yes |
| ENSG00000153201 |     |     | yes | yes | yes |     |
| ENSG00000179403 | yes |     | yes | yes |     | yes |
| ENSG00000183918 |     |     | yes |     |     |     |
| ENSG00000023191 |     |     |     |     |     | yes |
| ENSG00000168005 |     |     |     |     |     | yes |
| ENSG00000197930 | yes |     |     | yes | yes |     |
| ENSG00000166289 |     |     |     |     |     | yes |
| ENSG00000138071 | yes | yes |     | yes | yes |     |
| ENSG00000046604 |     |     |     | yes |     |     |
| ENSG00000128422 | yes |     |     | yes | yes |     |
| ENSG00000135900 |     |     |     |     | yes |     |
| ENSG00000184588 |     | yes |     |     |     |     |
| ENSG00000077514 |     |     |     |     |     | yes |
| ENSG00000082146 |     | yes | yes | yes | yes |     |
| ENSG00000160932 | yes |     |     | yes | yes | yes |
| ENSG00000173262 | yes |     |     | yes | yes |     |
| ENSG00000198417 |     |     | yes |     | yes | yes |
| ENSG0000006282  | yes | yes | yes |     |     |     |
| ENSG00000149554 | yes |     |     |     |     |     |
| ENSG00000178053 | yes |     |     |     |     |     |
| ENSG00000180448 |     |     |     |     |     | yes |
| ENSG00000102858 |     |     |     |     |     | yes |
| ENSG00000114779 |     |     | yes |     |     | yes |
| ENSG00000169418 |     |     |     | yes | yes |     |
| ENSG00000198692 | yes | yes | yes |     |     |     |
| ENSG00000112320 | yes |     |     | yes | yes |     |
| ENSG00000143153 |     | yes |     | yes |     | yes |
| ENSG00000114423 |     |     | yes |     |     |     |
| ENSG00000169738 |     |     | yes |     |     |     |
| ENSG00000161243 |     | yes |     |     |     |     |
| ENSG00000114948 | yes | yes |     | yes | yes |     |
| ENSG00000167202 |     |     | yes |     |     | yes |
| ENSG00000110066 |     | yes | yes |     |     |     |
| ENSG00000182378 | yes | yes | yes |     |     |     |
| ENSG00000100024 |     | yes |     |     |     | yes |
| ENSG00000180917 | yes |     |     | yes |     |     |
| ENSG00000155962 | yes |     |     | yes | yes |     |
| ENSG00000184886 | yes |     | yes |     |     | yes |
| ENSG00000156171 |     |     | yes |     |     |     |
| ENSG00000087087 |     |     |     | yes |     |     |
| ENSG00000110002 | yes |     |     |     |     |     |
| ENSG00000118507 |     | yes | yes | yes |     |     |
| ENSG00000153904 | yes |     |     | yes | yes |     |
| ENSG00000144036 |     |     | yes |     |     | yes |

|                 |     |     |     |     |     |
|-----------------|-----|-----|-----|-----|-----|
| ENSG00000119686 | yes | yes |     | yes | yes |
| ENSG00000071794 |     |     |     |     | yes |
| ENSG00000143375 |     |     |     |     | yes |
| ENSG00000211460 | yes |     |     | yes |     |
| ENSG00000102575 | yes |     | yes | yes | yes |
| ENSG00000186088 | yes |     |     | yes | yes |
| ENSG00000135763 | yes | yes | yes |     |     |
| ENSG00000159884 |     |     |     |     | yes |
| ENSG00000148671 |     | yes |     | yes | yes |
| ENSG00000161395 |     | yes |     |     |     |
| ENSG00000147454 |     |     |     | yes | yes |
| ENSG00000160014 |     |     |     |     | yes |
| ENSG00000204577 | yes |     |     | yes | yes |
| ENSG00000132205 |     |     | yes |     | yes |
| ENSG00000100219 |     | yes |     |     | yes |
| ENSG00000082397 |     | yes | yes |     |     |
| ENSG00000131503 |     |     | yes |     |     |
| ENSG00000154611 |     |     | yes |     | yes |
| ENSG00000151474 |     |     | yes | yes | yes |
| ENSG00000120705 | yes |     |     |     |     |
| ENSG00000137825 |     | yes |     |     |     |
| ENSG00000112893 | yes |     |     | yes | yes |
| ENSG00000101187 |     | yes | yes | yes | yes |
| ENSG00000137868 | yes |     |     | yes | yes |
| ENSG00000125977 |     |     |     |     | yes |
| ENSG00000186352 | yes |     | yes | yes | yes |
| ENSG00000151640 | yes | yes | yes |     | yes |
| ENSG00000125462 |     |     |     | yes |     |
| ENSG00000162337 | yes |     |     | yes | yes |
| ENSG00000138964 |     |     | yes |     | yes |
| ENSG00000112511 | yes |     |     | yes | yes |
| ENSG00000178381 |     |     | yes |     | yes |
| ENSG00000167634 |     |     | yes | yes |     |
| ENSG00000167632 |     |     | yes |     | yes |
| ENSG00000197081 |     |     |     |     | yes |
| ENSG00000133424 |     | yes | yes |     |     |
| ENSG00000048028 | yes |     |     | yes | yes |
| ENSG00000101901 |     |     | yes |     | yes |
| ENSG00000143653 |     | yes | yes |     |     |
| ENSG00000141198 |     |     |     | yes |     |
| ENSG00000159674 | yes |     |     | yes | yes |
| ENSG00000059377 |     | yes |     |     | yes |
| ENSG00000133561 |     | yes | yes |     |     |
| ENSG00000134864 |     |     |     | yes | yes |
| ENSG00000106415 |     | yes | yes |     |     |
| ENSG00000073060 |     | yes |     |     |     |
| ENSG00000027075 | yes |     |     | yes | yes |
| ENSG00000111737 |     | yes |     | yes | yes |
| ENSG00000118922 |     |     | yes |     | yes |
| ENSG00000145736 |     | yes |     | yes |     |
| ENSG00000145495 |     |     | yes |     |     |
| ENSG00000177627 |     |     |     | yes | yes |
| ENSG00000196653 |     | yes | yes |     |     |
| ENSG00000088832 |     |     | yes |     | yes |

|                 |     |     |     |     |     |     |
|-----------------|-----|-----|-----|-----|-----|-----|
| ENSG00000104812 |     |     |     | yes |     | yes |
| ENSG00000152990 |     |     |     |     | yes |     |
| ENSG00000100628 | yes |     |     | yes | yes |     |
| ENSG00000186860 |     | yes | yes |     |     |     |
| ENSG00000100395 | yes |     |     | yes |     |     |
| ENSG00000112977 |     |     |     | yes |     | yes |
| ENSG00000121989 |     |     |     | yes | yes |     |
| ENSG00000119912 | yes |     |     | yes |     |     |
| ENSG00000205352 |     | yes |     |     |     | yes |
| ENSG00000163132 |     | yes | yes | yes | yes |     |
| ENSG00000188001 | yes |     |     | yes | yes |     |
| ENSG00000196154 |     | yes |     | yes |     | yes |
| ENSG00000146463 |     |     |     |     |     | yes |
| ENSG00000097021 |     |     |     |     | yes |     |
| ENSG00000137709 |     | yes |     | yes |     |     |
| ENSG00000154165 |     |     |     | yes |     | yes |
| ENSG00000172175 | yes |     |     |     |     |     |
| ENSG00000102781 |     |     |     |     |     | yes |
| ENSG00000132819 |     |     |     | yes |     | yes |
| ENSG00000164659 |     |     | yes |     | yes | yes |
| ENSG00000011638 | yes |     |     | yes |     |     |
| ENSG00000205358 |     |     | yes |     | yes |     |
| ENSG00000138134 |     |     |     | yes |     | yes |
| ENSG00000166173 | yes |     |     | yes | yes |     |
| ENSG00000108187 |     |     |     |     | yes |     |
| ENSG00000204574 |     |     |     |     |     | yes |
| ENSG00000117133 |     | yes | yes |     |     |     |
| ENSG00000151702 | yes |     |     |     |     |     |
| ENSG00000124635 |     |     |     |     |     | yes |
| ENSG00000205021 | yes |     |     | yes | yes |     |
| ENSG00000136156 | yes | yes | yes |     |     |     |
| ENSG00000141526 | yes |     |     | yes | yes |     |
| ENSG00000173702 | yes |     |     | yes | yes |     |
| ENSG00000145990 | yes |     |     |     |     |     |
| ENSG00000104419 | yes | yes |     |     | yes | yes |
| ENSG00000130305 |     | yes |     |     |     |     |
| ENSG00000152256 |     |     | yes |     |     | yes |
| ENSG00000013573 |     |     |     |     |     | yes |
| ENSG00000112640 |     |     |     |     |     | yes |
| ENSG00000163703 | yes |     |     | yes | yes |     |
| ENSG00000154928 |     | yes |     | yes |     | yes |
| ENSG00000114520 |     |     |     |     | yes | yes |
| ENSG00000163376 | yes |     | yes |     |     |     |
| ENSG00000102024 |     |     | yes |     | yes | yes |
| ENSG00000153575 | yes |     |     | yes | yes |     |
| ENSG00000049247 |     | yes | yes | yes | yes |     |
| ENSG00000153406 |     | yes |     |     |     |     |
| ENSG00000177106 | yes |     |     |     | yes |     |
| ENSG00000076928 | yes |     |     | yes |     | yes |
| ENSG00000170727 |     | yes |     |     |     |     |
| ENSG00000205220 |     |     |     |     |     | yes |
| ENSG00000180263 |     |     |     |     |     | yes |
| ENSG00000099385 |     |     |     |     |     | yes |
| ENSG00000079432 |     |     |     |     |     | yes |



|                 |     |     |     |     |     |     |
|-----------------|-----|-----|-----|-----|-----|-----|
| ENSG00000104375 |     |     |     |     |     | yes |
| ENSG0000000938  | yes | yes | yes |     |     |     |
| ENSG00000173209 |     |     | yes |     |     |     |
| ENSG00000134107 | yes |     |     | yes | yes |     |
| ENSG00000136824 | yes |     |     | yes | yes |     |
| ENSG00000100075 |     |     |     |     |     | yes |
| ENSG00000165506 |     | yes |     |     |     |     |
| ENSG00000095002 | yes |     |     |     |     |     |
| ENSG00000172081 | yes |     | yes |     |     |     |
| ENSG00000160746 |     |     | yes |     |     | yes |
| ENSG00000143119 | yes | yes |     |     |     |     |
| ENSG00000164484 |     | yes | yes | yes | yes | yes |
| ENSG00000105854 | yes |     | yes | yes | yes | yes |
| ENSG00000152969 |     |     |     |     | yes |     |
| ENSG00000132773 |     |     | yes |     |     |     |
| ENSG00000153037 | yes |     | yes |     |     |     |
| ENSG00000184983 | yes |     |     | yes | yes |     |
| ENSG00000100241 |     | yes |     |     |     | yes |
| ENSG00000146425 |     |     |     | yes |     |     |
| ENSG00000253506 |     |     | yes |     |     | yes |
| ENSG00000198598 | yes | yes |     | yes | yes | yes |
| ENSG00000062822 |     |     |     | yes |     | yes |
| ENSG00000148935 | yes |     | yes |     |     | yes |
| ENSG00000156398 |     | yes |     | yes | yes | yes |
| ENSG00000204351 |     |     |     |     |     | yes |
| ENSG00000115590 | yes |     | yes | yes | yes |     |
| ENSG00000198746 |     |     |     |     |     | yes |
| ENSG00000104921 | yes |     |     | yes | yes |     |
| ENSG00000079805 |     |     |     |     |     | yes |
| ENSG00000064692 | yes |     |     | yes | yes |     |
| ENSG00000100385 |     | yes |     |     |     |     |
| ENSG00000111348 |     | yes |     |     |     | yes |
| ENSG00000189077 |     | yes |     | yes |     | yes |
| ENSG00000105355 |     | yes |     |     |     |     |
| ENSG00000169981 | yes |     | yes |     |     | yes |
| ENSG00000151790 |     |     |     | yes |     |     |
| ENSG00000163947 | yes |     |     | yes | yes |     |
| ENSG00000102409 |     | yes | yes |     |     |     |
| ENSG00000115884 | yes | yes |     |     |     | yes |
| ENSG00000132170 |     |     |     |     | yes |     |
| ENSG00000112851 |     |     |     | yes |     |     |
| ENSG00000103111 |     |     | yes |     |     | yes |
| ENSG0000007968  |     |     | yes | yes |     | yes |
| ENSG00000091039 |     |     |     |     |     | yes |
| ENSG00000164506 | yes |     |     | yes | yes |     |
| ENSG00000073737 |     | yes | yes | yes |     | yes |
| ENSG00000148400 |     |     |     | yes |     |     |
| ENSG00000106560 |     | yes | yes |     |     |     |
| ENSG00000160785 | yes |     |     | yes |     |     |
| ENSG00000120708 |     |     | yes |     |     |     |
| ENSG00000173041 |     |     |     |     |     | yes |
| ENSG00000143924 |     |     |     |     | yes |     |
| ENSG00000099849 | yes |     |     |     |     |     |
| ENSG00000156853 |     |     |     |     |     | yes |

|                 |     |     |     |     |     |     |
|-----------------|-----|-----|-----|-----|-----|-----|
| ENSG00000148297 |     |     |     |     |     | yes |
| ENSG00000100380 |     |     |     |     |     | yes |
| ENSG00000214113 | yes | yes |     |     |     |     |
| ENSG00000089693 |     |     |     |     |     | yes |
| ENSG00000185946 |     |     |     | yes |     |     |
| ENSG00000028277 |     |     |     | yes |     | yes |
| ENSG00000133101 |     |     |     |     | yes |     |
| ENSG00000119965 | yes |     |     |     |     |     |
| ENSG00000120725 |     |     |     |     |     | yes |
| ENSG00000184293 | yes |     |     | yes | yes |     |
| ENSG00000138709 | yes |     | yes |     |     |     |
| ENSG00000141644 | yes |     |     |     |     |     |
| ENSG00000124279 | yes |     | yes |     |     |     |
| ENSG00000128218 |     | yes | yes | yes | yes |     |
| ENSG00000155380 |     |     |     |     | yes | yes |
| ENSG00000135924 |     |     |     | yes |     |     |
| ENSG00000135821 |     | yes |     |     |     |     |
| ENSG00000177697 |     | yes | yes |     | yes |     |
| ENSG00000163362 |     |     |     | yes |     | yes |
| ENSG00000099326 |     | yes |     |     |     |     |
| ENSG00000132274 |     |     |     |     |     | yes |
| ENSG00000142186 |     |     |     |     |     | yes |
| ENSG00000213029 |     |     | yes |     |     |     |
| ENSG00000105373 |     | yes |     |     |     | yes |
| ENSG00000162341 | yes |     | yes | yes |     | yes |
| ENSG00000104290 |     |     |     | yes |     | yes |
| ENSG00000196141 |     |     |     |     |     | yes |
| ENSG00000197888 |     | yes | yes | yes | yes |     |
| ENSG00000085465 | yes |     |     | yes | yes |     |
| ENSG00000084207 |     | yes |     |     |     | yes |
| ENSG00000099219 | yes |     |     | yes | yes |     |
| ENSG00000156976 | yes |     |     | yes |     |     |
| ENSG00000145332 |     |     | yes |     |     |     |
| ENSG00000174125 | yes | yes | yes |     |     | yes |
| ENSG00000147813 |     | yes | yes | yes | yes | yes |
| ENSG00000140030 |     |     |     | yes | yes |     |
| ENSG00000046651 |     |     |     |     |     | yes |
| ENSG00000137441 | yes |     |     | yes | yes |     |
| ENSG00000165997 |     | yes |     |     |     |     |
| ENSG00000221983 | yes | yes | yes |     |     |     |
| ENSG00000108679 | yes | yes |     | yes | yes | yes |
| ENSG00000182472 | yes |     |     | yes | yes |     |
| ENSG00000137161 |     |     |     |     |     | yes |
| ENSG00000005436 | yes |     |     |     |     |     |
| ENSG00000109390 |     |     |     | yes |     | yes |
| ENSG00000074660 |     |     |     | yes |     |     |
| ENSG00000187239 |     | yes |     |     |     |     |
| ENSG00000083123 |     |     |     |     |     | yes |
| ENSG00000072858 | yes |     |     |     |     |     |
| ENSG00000113194 |     |     |     |     |     | yes |
| ENSG00000158457 |     | yes |     | yes |     |     |
| ENSG00000172349 |     | yes |     |     |     |     |
| ENSG00000096746 |     |     |     |     |     | yes |
| ENSG00000132510 |     |     |     | yes |     | yes |

|                 |     |     |     |     |     |     |
|-----------------|-----|-----|-----|-----|-----|-----|
| ENSG00000169100 |     |     |     |     |     | yes |
| ENSG00000090006 |     |     |     | yes |     | yes |
| ENSG00000100055 | yes | yes | yes |     |     |     |
| ENSG00000198053 | yes | yes | yes |     |     |     |
| ENSG00000145287 | yes | yes | yes | yes | yes |     |
| ENSG00000085185 | yes |     |     |     |     |     |
| ENSG00000179163 |     | yes | yes | yes |     |     |
| ENSG00000136573 |     | yes | yes | yes |     | yes |
| ENSG00000172005 |     |     |     |     | yes | yes |
| ENSG00000170684 | yes |     |     | yes | yes |     |
| ENSG00000185504 |     |     |     |     |     | yes |
| ENSG00000165929 |     | yes |     | yes |     | yes |
| ENSG00000131653 |     |     | yes |     |     |     |
| ENSG00000157827 |     | yes | yes | yes | yes |     |
| ENSG00000156738 |     | yes | yes | yes |     |     |
| ENSG00000213339 |     |     |     |     |     | yes |
| ENSG00000091527 |     |     |     |     |     | yes |
| ENSG00000242574 |     | yes |     |     |     |     |
| ENSG00000206337 |     | yes | yes |     |     |     |
| ENSG00000010626 |     | yes |     |     |     |     |
| ENSG00000121966 | yes |     |     | yes |     |     |
| ENSG00000176454 |     |     |     | yes |     | yes |
| ENSG00000198805 |     | yes | yes |     |     |     |
| ENSG00000170627 | yes | yes | yes | yes | yes |     |
| ENSG00000152894 |     |     |     |     | yes | yes |
| ENSG00000162614 |     | yes | yes |     |     |     |
| ENSG00000134343 | yes |     |     | yes | yes |     |
| ENSG00000054611 |     | yes |     |     |     |     |
| ENSG00000169957 |     |     |     | yes |     | yes |
| ENSG00000127824 | yes |     |     | yes | yes |     |
| ENSG00000086730 | yes |     |     | yes | yes |     |
| ENSG00000117000 | yes |     |     |     |     |     |
| ENSG00000174788 | yes |     |     |     |     |     |
| ENSG00000244038 |     |     |     |     |     | yes |
| ENSG00000149499 |     |     |     |     |     | yes |
| ENSG00000152061 |     |     |     |     | yes |     |
| ENSG00000075975 |     | yes |     |     |     |     |
| ENSG00000111671 |     | yes | yes |     |     | yes |
| ENSG00000050030 | yes |     |     | yes | yes | yes |
| ENSG00000187954 | yes | yes |     |     |     |     |
| ENSG00000164715 |     |     |     |     |     | yes |
| ENSG00000183508 |     |     |     |     | yes |     |
| ENSG00000140398 | yes | yes | yes | yes | yes |     |
| ENSG00000005379 |     |     |     | yes | yes |     |
| ENSG00000028137 | yes | yes |     | yes | yes | yes |
| ENSG00000175197 |     |     | yes |     | yes | yes |
| ENSG00000175602 |     | yes |     |     |     |     |
| ENSG00000087157 |     |     |     |     |     | yes |
| ENSG00000179750 |     | yes | yes | yes |     |     |
| ENSG00000115641 | yes |     |     | yes | yes |     |
| ENSG00000139350 | yes |     |     | yes | yes |     |
| ENSG00000145730 | yes |     |     | yes | yes |     |
| ENSG00000106853 | yes |     | yes |     |     |     |
| ENSG00000164849 | yes |     | yes | yes | yes | yes |

|                 |     |     |     |     |     |     |
|-----------------|-----|-----|-----|-----|-----|-----|
| ENSG00000178922 | yes | yes |     |     |     |     |
| ENSG00000147168 |     |     |     | yes |     | yes |
| ENSG0000068654  |     |     | yes |     |     |     |
| ENSG00000177459 |     |     | yes | yes |     | yes |
| ENSG00000244752 | yes | yes | yes |     |     |     |
| ENSG00000235750 | yes |     |     | yes | yes |     |
| ENSG00000137959 | yes |     |     | yes | yes |     |
| ENSG00000188994 |     |     |     |     |     | yes |
| ENSG00000184903 |     | yes |     |     |     | yes |
| ENSG00000105383 |     | yes |     |     |     | yes |
| ENSG00000184357 |     |     | yes |     |     | yes |
| ENSG00000179088 |     |     | yes |     |     |     |
| ENSG00000196735 |     | yes | yes | yes | yes | yes |
| ENSG00000099956 |     | yes |     |     |     |     |
| ENSG00000100410 |     |     | yes |     |     |     |
| ENSG00000141380 |     |     |     |     | yes |     |
| ENSG00000137267 | yes | yes | yes | yes | yes | yes |
| ENSG00000171453 |     |     | yes |     |     |     |
| ENSG00000203879 |     |     |     |     |     | yes |
| ENSG00000117143 |     | yes | yes |     |     |     |
| ENSG00000077150 |     | yes |     |     |     | yes |
| ENSG00000077235 |     |     |     |     |     | yes |
| ENSG00000115504 |     |     |     |     |     | yes |
| ENSG00000132846 | yes |     |     |     | yes |     |
| ENSG00000128311 |     | yes |     |     |     |     |
| ENSG00000109220 |     |     |     |     |     | yes |
| ENSG00000163121 | yes | yes |     | yes | yes | yes |
| ENSG00000188389 |     | yes |     | yes | yes |     |
| ENSG00000117174 | yes |     | yes |     |     |     |
| ENSG00000137198 |     |     |     |     |     | yes |
| ENSG00000170264 |     |     |     |     |     | yes |
| ENSG00000171848 | yes |     | yes | yes |     | yes |
| ENSG00000166133 |     |     |     |     |     | yes |
| ENSG00000124587 | yes | yes | yes |     |     |     |
| ENSG00000115604 | yes |     | yes | yes | yes | yes |
| ENSG00000144560 | yes |     |     | yes | yes |     |
| ENSG00000181222 |     |     |     |     |     | yes |
| ENSG00000233224 |     |     |     |     |     | yes |
| ENSG00000136205 |     | yes | yes |     |     |     |
| ENSG00000118515 |     | yes | yes |     | yes | yes |
| ENSG00000122692 | yes |     |     |     |     |     |
| ENSG00000168310 |     |     |     | yes |     | yes |
| ENSG00000051523 |     |     |     |     | yes |     |
| ENSG00000166750 |     |     | yes |     |     | yes |
| ENSG00000048540 | yes | yes |     | yes | yes | yes |
| ENSG00000167081 | yes |     |     |     |     |     |
| ENSG00000135457 |     |     |     |     | yes |     |
| ENSG00000066923 |     | yes |     |     |     |     |
| ENSG00000084774 |     |     |     |     |     | yes |
| ENSG00000213983 |     |     | yes |     |     |     |
| ENSG00000179950 |     |     |     |     |     | yes |
| ENSG00000133256 | yes |     |     | yes | yes |     |
| ENSG00000166394 |     | yes | yes | yes | yes |     |
| ENSG00000101190 |     |     | yes |     | yes | yes |

|                 |     |     |     |     |     |     |
|-----------------|-----|-----|-----|-----|-----|-----|
| ENSG00000138101 |     | yes |     | yes | yes |     |
| ENSG00000187990 |     |     |     |     |     | yes |
| ENSG00000188343 | yes | yes |     |     | yes | yes |
| ENSG00000087077 |     |     |     | yes |     |     |
| ENSG00000240563 | yes | yes | yes | yes | yes |     |
| ENSG00000130513 | yes |     |     | yes | yes |     |
| ENSG00000240344 | yes | yes | yes |     |     |     |
| ENSG00000129277 | yes |     | yes | yes | yes |     |
| ENSG00000173531 |     | yes | yes |     |     |     |
| ENSG00000164587 |     |     |     |     |     | yes |
| ENSG00000168234 |     |     | yes | yes | yes | yes |
| ENSG00000125898 |     |     |     |     |     | yes |
| ENSG00000243056 |     |     |     | yes |     |     |
| ENSG00000143537 |     |     |     | yes |     | yes |
| ENSG00000131759 |     |     | yes |     |     | yes |
| ENSG00000127419 |     | yes |     |     |     |     |
| ENSG00000147065 | yes |     |     |     |     |     |
| ENSG00000160211 |     |     |     |     |     | yes |
| ENSG00000017483 |     | yes | yes |     |     |     |
| ENSG00000152689 |     | yes | yes |     |     |     |
| ENSG00000159388 | yes |     |     |     |     |     |
| ENSG00000065029 |     | yes |     |     |     |     |
| ENSG00000164638 |     |     |     | yes |     |     |
| ENSG00000115009 |     |     | yes |     | yes | yes |
| ENSG00000067048 | yes | yes | yes |     |     |     |
| ENSG00000081913 | yes |     | yes | yes |     | yes |
| ENSG00000158402 | yes |     |     | yes | yes |     |
| ENSG00000008256 | yes | yes | yes |     |     |     |
| ENSG00000070214 | yes |     |     | yes | yes | yes |
| ENSG00000154065 |     |     |     |     |     | yes |
| ENSG00000079112 |     | yes |     | yes | yes |     |
| ENSG00000106829 | yes |     |     | yes | yes |     |
| ENSG00000005194 | yes |     |     | yes |     |     |
| ENSG00000143575 |     |     | yes |     |     |     |
| ENSG00000012779 | yes |     |     | yes | yes |     |
| ENSG00000154620 |     | yes | yes |     |     |     |
| ENSG00000135838 | yes |     |     | yes | yes |     |
| ENSG00000136514 |     |     |     |     | yes |     |
| ENSG00000123329 | yes |     |     |     |     |     |
| ENSG00000118200 | yes |     |     | yes | yes |     |
| ENSG00000099910 |     | yes | yes |     |     |     |
| ENSG00000168066 | yes | yes | yes | yes | yes |     |
| ENSG00000196950 |     |     |     |     |     | yes |
| ENSG00000139626 |     | yes |     |     |     |     |
| ENSG00000065989 |     |     |     | yes |     | yes |
| ENSG00000136108 |     |     |     | yes |     |     |
| ENSG00000135596 |     | yes |     |     |     |     |
| ENSG00000104852 |     |     |     |     |     | yes |
| ENSG00000104805 |     |     |     |     |     | yes |
| ENSG00000026508 |     |     | yes | yes | yes |     |
| ENSG00000163877 |     |     |     |     |     | yes |
| ENSG00000174943 |     |     |     |     |     | yes |
| ENSG00000143797 | yes | yes | yes |     | yes | yes |
| ENSG00000139357 |     |     |     |     |     | yes |

|                 |     |     |     |     |     |     |
|-----------------|-----|-----|-----|-----|-----|-----|
| ENSG0000078237  | yes |     |     | yes | yes |     |
| ENSG00000163389 |     |     |     | yes | yes |     |
| ENSG0000072840  | yes |     |     | yes | yes |     |
| ENSG00000130775 | yes |     |     |     |     |     |
| ENSG00000164761 | yes |     |     | yes | yes | yes |
| ENSG00000172179 | yes |     |     | yes | yes |     |
| ENSG00000183878 |     | yes | yes |     |     |     |
| ENSG00000157800 |     | yes |     |     |     |     |
| ENSG00000169413 | yes | yes |     |     |     |     |
| ENSG00000146122 | yes |     |     | yes | yes | yes |
| ENSG00000080608 | yes |     |     |     |     |     |
| ENSG00000130489 |     |     | yes |     |     | yes |
| ENSG00000170915 |     |     | yes |     | yes | yes |
| ENSG00000119917 |     | yes |     |     |     | yes |
| ENSG00000082781 |     | yes | yes | yes | yes | yes |
| ENSG00000120860 | yes |     |     |     |     |     |
| ENSG00000108064 |     |     |     | yes | yes |     |
| ENSG00000169045 |     | yes |     | yes |     | yes |
| ENSG00000117682 | yes |     |     | yes |     | yes |
| ENSG00000131584 |     |     |     |     |     | yes |
| ENSG00000151552 |     |     |     |     |     | yes |
| ENSG00000128699 | yes | yes | yes |     |     |     |
| ENSG00000061676 |     | yes | yes | yes | yes | yes |
| ENSG00000162385 |     |     |     |     |     | yes |
| ENSG00000186918 | yes |     |     | yes | yes |     |
| ENSG00000146707 |     |     | yes |     | yes | yes |
| ENSG00000198131 | yes |     | yes | yes |     | yes |
| ENSG00000070770 |     |     | yes |     |     | yes |
| ENSG00000108861 |     |     |     | yes |     |     |
| ENSG00000137947 |     |     | yes |     |     |     |
| ENSG00000143384 |     |     | yes |     |     | yes |
| ENSG00000068137 |     |     | yes |     |     | yes |
| ENSG00000107742 |     |     |     |     |     | yes |
| ENSG00000005448 | yes |     |     |     |     |     |
| ENSG00000152082 |     |     |     |     |     | yes |
| ENSG00000133574 | yes | yes | yes |     |     |     |
| ENSG00000125398 |     | yes |     | yes | yes |     |
| ENSG00000175283 | yes |     |     | yes |     | yes |
| ENSG00000197472 |     | yes | yes | yes |     |     |
| ENSG00000107020 |     |     |     |     | yes | yes |
| ENSG00000104946 |     |     |     | yes |     | yes |
| ENSG00000196730 | yes |     |     | yes | yes |     |
| ENSG00000115652 |     | yes | yes |     |     |     |
| ENSG00000166147 |     |     | yes | yes | yes | yes |
| ENSG00000118432 | yes |     | yes | yes | yes | yes |
| ENSG00000167740 |     |     |     |     | yes |     |
| ENSG00000135925 | yes |     |     | yes | yes |     |
| ENSG00000196226 |     |     |     |     |     | yes |
| ENSG00000184524 | yes |     |     | yes |     |     |
| ENSG00000127666 |     | yes | yes |     |     |     |
| ENSG00000118292 | yes | yes |     |     |     |     |
| ENSG00000185885 | yes |     |     | yes | yes |     |
| ENSG00000148450 |     | yes | yes |     |     |     |
| ENSG00000172086 |     | yes | yes |     | yes |     |

|                 |     |     |     |     |     |     |
|-----------------|-----|-----|-----|-----|-----|-----|
| ENSG00000117791 | yes |     | yes | yes | yes | yes |
| ENSG00000112149 | yes | yes | yes |     |     |     |
| ENSG00000103202 |     |     |     |     |     | yes |
| ENSG00000135829 | yes |     |     | yes | yes |     |
| ENSG00000180902 |     | yes |     |     |     | yes |
| ENSG00000160593 | yes | yes | yes |     |     |     |
| ENSG00000136404 |     |     |     |     | yes |     |
| ENSG00000121552 | yes | yes |     |     |     | yes |
| ENSG00000176014 |     |     |     | yes | yes |     |
| ENSG00000075426 | yes | yes |     | yes | yes |     |
| ENSG00000130164 |     |     |     |     | yes | yes |
| ENSG00000148459 | yes | yes | yes |     |     |     |
| ENSG00000095370 | yes |     | yes | yes |     | yes |
| ENSG00000127837 |     |     |     |     |     | yes |
| ENSG00000018699 |     | yes |     |     |     |     |
| ENSG00000139291 |     |     |     |     |     | yes |
| ENSG00000090104 |     |     |     |     |     | yes |
| ENSG00000228314 |     |     |     |     |     | yes |
| ENSG00000118985 | yes |     |     |     |     |     |
| ENSG00000058600 |     |     | yes |     |     |     |
| ENSG00000182718 |     |     | yes |     |     |     |
| ENSG00000198796 | yes | yes |     |     |     | yes |
| ENSG00000136732 | yes |     |     | yes | yes |     |
| ENSG00000099341 |     |     |     | yes |     | yes |
| ENSG00000226979 |     |     | yes |     |     |     |
| ENSG00000198855 |     |     | yes |     |     | yes |
| ENSG00000204475 | yes | yes |     |     |     |     |
| ENSG00000145882 |     |     |     |     |     | yes |
| ENSG00000135766 | yes |     |     |     |     |     |
| ENSG00000155506 |     |     |     |     |     | yes |
| ENSG00000196352 |     | yes | yes |     |     |     |
| ENSG00000002587 |     | yes |     | yes |     | yes |
| ENSG00000012124 | yes | yes | yes |     |     |     |
| ENSG00000102471 | yes |     |     | yes | yes |     |
| ENSG00000127884 |     | yes |     |     |     | yes |
| ENSG00000151458 |     |     |     | yes | yes |     |
| ENSG00000227826 | yes | yes | yes | yes | yes |     |
| ENSG00000184428 | yes | yes | yes |     |     |     |
| ENSG00000125772 |     |     | yes |     |     |     |
| ENSG00000166401 |     |     |     | yes | yes |     |
| ENSG00000100439 | yes |     |     |     |     |     |
| ENSG00000125726 | yes |     |     | yes | yes |     |
| ENSG00000111537 | yes | yes |     |     | yes | yes |
| ENSG00000169442 | yes | yes |     |     |     |     |
| ENSG00000166681 | yes | yes | yes |     | yes |     |
| ENSG00000120616 |     |     |     |     |     | yes |
| ENSG00000196498 |     |     |     | yes |     | yes |
| ENSG00000143479 |     | yes |     |     |     |     |
| ENSG00000183426 | yes |     | yes |     |     |     |
| ENSG00000175832 |     |     |     |     |     | yes |
| ENSG00000151882 | yes |     |     | yes |     |     |
| ENSG00000166165 | yes | yes | yes | yes |     | yes |
| ENSG00000113328 |     |     |     | yes | yes |     |
| ENSG00000083857 | yes |     |     | yes | yes |     |

|                 |     |     |     |     |     |     |
|-----------------|-----|-----|-----|-----|-----|-----|
| ENSG00000134955 | yes |     | yes | yes | yes |     |
| ENSG00000188641 |     |     |     | yes |     | yes |
| ENSG00000161570 | yes |     |     |     | yes |     |
| ENSG00000172183 | yes |     |     |     | yes | yes |
| ENSG00000101746 | yes |     |     | yes | yes |     |
| ENSG00000091483 | yes |     |     |     |     |     |
| ENSG00000119408 |     |     |     |     | yes |     |
| ENSG00000177556 |     |     |     |     |     | yes |
| ENSG00000111358 |     | yes |     | yes |     |     |
| ENSG00000161513 |     | yes | yes |     |     |     |
| ENSG00000167123 | yes |     |     |     |     |     |
| ENSG00000185112 |     |     |     |     | yes |     |
| ENSG00000171729 | yes | yes |     | yes | yes |     |
| ENSG00000198718 |     |     |     |     |     | yes |
| ENSG00000116711 |     |     |     |     | yes |     |
| ENSG00000125170 |     | yes |     |     |     |     |
| ENSG00000047644 |     |     |     |     |     | yes |
| ENSG00000129204 |     |     |     |     |     | yes |
| ENSG00000121064 | yes | yes | yes |     |     |     |
| ENSG00000170558 | yes |     |     | yes | yes |     |
| ENSG00000115183 | yes |     |     | yes | yes |     |
| ENSG00000117724 |     |     |     | yes | yes |     |
| ENSG00000116741 | yes |     | yes |     |     | yes |
| ENSG00000196588 | yes |     |     | yes |     | yes |
| ENSG00000138613 |     | yes |     | yes |     | yes |
| ENSG00000134690 | yes |     |     | yes |     | yes |
| ENSG00000076716 |     | yes | yes | yes | yes |     |
| ENSG00000119729 |     | yes |     | yes |     | yes |
| ENSG00000135913 |     |     |     |     |     | yes |
| ENSG00000137285 | yes | yes |     |     | yes | yes |
| ENSG00000147324 | yes |     |     | yes | yes |     |
| ENSG00000197223 | yes | yes | yes |     |     |     |
| ENSG00000172927 | yes | yes | yes |     |     |     |
| ENSG00000112425 |     |     |     | yes |     |     |
| ENSG00000110852 | yes |     |     | yes | yes |     |
| ENSG00000140105 |     |     |     |     |     | yes |
| ENSG00000150907 |     | yes | yes | yes |     | yes |
| ENSG00000166823 |     | yes | yes |     |     |     |
| ENSG00000162654 | yes |     |     | yes | yes |     |
| ENSG00000160216 |     |     |     |     |     | yes |
| ENSG00000221955 |     | yes | yes | yes | yes |     |
| ENSG00000160789 |     |     | yes |     |     |     |
| ENSG00000144837 | yes |     |     | yes | yes |     |
| ENSG00000179912 | yes |     |     | yes |     |     |
| ENSG00000064601 |     |     |     |     |     | yes |
| ENSG00000181523 |     |     | yes |     |     | yes |
| ENSG00000068097 |     | yes | yes |     |     |     |
| ENSG00000167851 | yes |     |     | yes | yes |     |
| ENSG00000181744 |     |     |     |     |     | yes |
| ENSG00000198625 | yes |     |     | yes |     |     |
| ENSG00000120594 |     |     |     | yes | yes |     |
| ENSG00000100413 |     |     | yes |     |     |     |
| ENSG00000148399 |     |     |     |     |     | yes |
| ENSG00000151445 |     |     | yes |     |     |     |



|                 |     |     |     |     |     |     |
|-----------------|-----|-----|-----|-----|-----|-----|
| ENSG00000152465 |     | yes |     |     |     |     |
| ENSG00000141384 | yes |     |     |     |     |     |
| ENSG00000186395 |     |     |     |     |     | yes |
| ENSG00000100294 |     | yes |     |     |     |     |
| ENSG00000129055 |     |     |     |     | yes | yes |
| ENSG00000117054 |     | yes |     |     |     |     |
| ENSG00000156313 |     | yes | yes | yes |     |     |
| ENSG0000002822  |     |     | yes |     |     | yes |
| ENSG00000105193 | yes |     |     |     | yes |     |
| ENSG00000185862 | yes | yes |     |     | yes |     |
| ENSG00000115594 | yes | yes | yes | yes | yes | yes |
| ENSG00000216490 |     |     |     | yes |     |     |
| ENSG00000148090 | yes |     |     | yes |     |     |
| ENSG00000163040 |     |     | yes |     | yes |     |
| ENSG00000105698 | yes |     | yes | yes |     | yes |
| ENSG00000185339 |     |     |     | yes | yes |     |
| ENSG00000123131 |     |     |     |     |     | yes |
| ENSG00000049167 |     |     |     | yes | yes |     |
| ENSG00000162434 | yes |     |     |     | yes |     |
| ENSG00000076924 |     | yes |     |     |     |     |
| ENSG00000166927 |     | yes | yes | yes | yes |     |
| ENSG00000164850 | yes |     |     | yes | yes |     |
| ENSG00000106991 |     |     |     | yes |     |     |
| ENSG00000125810 | yes |     |     | yes | yes |     |
| ENSG00000177169 |     | yes |     |     |     |     |
| ENSG00000126709 | yes |     |     | yes | yes |     |
| ENSG00000181192 |     |     |     | yes |     |     |
| ENSG00000142864 |     |     |     |     |     | yes |
| ENSG00000101017 |     | yes |     |     |     |     |
| ENSG00000182054 |     | yes |     |     |     | yes |
| ENSG00000111344 |     | yes |     | yes |     |     |
| ENSG00000128965 | yes | yes | yes |     |     | yes |
| ENSG00000122884 | yes |     |     | yes | yes |     |
| ENSG00000106009 |     |     |     |     |     | yes |
| ENSG00000176749 | yes |     |     |     |     |     |
| ENSG00000221869 |     |     |     | yes | yes |     |
| ENSG00000152217 |     | yes | yes |     |     |     |
| ENSG00000189171 | yes | yes | yes |     |     |     |
| ENSG00000213886 | yes |     |     |     |     |     |
| ENSG00000108773 |     |     |     |     |     | yes |
| ENSG00000132541 |     |     |     |     |     | yes |
| ENSG00000141510 |     |     |     |     |     | yes |
| ENSG00000067057 | yes |     |     | yes | yes |     |
| ENSG00000204389 |     | yes | yes |     |     |     |
| ENSG00000175857 | yes | yes | yes |     |     |     |
| ENSG00000100345 |     | yes |     | yes |     |     |
| ENSG00000171843 | yes |     |     |     |     |     |
| ENSG00000213719 |     |     |     |     | yes |     |
| ENSG00000180776 | yes |     |     | yes | yes | yes |
| ENSG00000035141 | yes |     |     | yes |     |     |
| ENSG00000164897 |     |     |     | yes |     | yes |
| ENSG00000165487 |     |     |     | yes | yes |     |
| ENSG00000109756 | yes |     |     | yes | yes |     |
| ENSG00000128849 |     |     |     |     | yes |     |

|                 |     |     |     |     |     |     |
|-----------------|-----|-----|-----|-----|-----|-----|
| ENSG0000072310  |     |     |     | yes |     |     |
| ENSG00000204592 | yes | yes |     |     | yes |     |
| ENSG00000198890 | yes |     |     |     |     |     |
| ENSG00000170962 |     |     |     | yes | yes |     |
| ENSG00000096070 |     |     |     | yes |     |     |
| ENSG00000102901 |     |     |     |     |     | yes |
| ENSG00000155755 | yes |     |     | yes | yes |     |
| ENSG00000148700 | yes | yes | yes |     |     |     |
| ENSG00000187624 | yes | yes | yes |     |     |     |
| ENSG00000120875 | yes |     | yes |     |     |     |
| ENSG00000109113 | yes | yes |     |     | yes | yes |
| ENSG00000134697 |     |     | yes |     |     |     |
| ENSG00000103426 | yes |     | yes | yes |     | yes |
| ENSG00000064932 |     |     |     |     |     | yes |
| ENSG00000154310 |     |     |     | yes |     |     |
| ENSG00000196576 |     |     |     |     |     | yes |
| ENSG00000196532 |     |     | yes |     | yes | yes |
| ENSG00000128228 |     |     | yes |     |     | yes |
| ENSG00000178127 |     |     |     |     |     | yes |
| ENSG00000100941 |     |     | yes |     | yes |     |
| ENSG00000183955 |     |     |     |     |     | yes |
| ENSG00000131089 |     |     |     | yes | yes |     |
| ENSG00000075292 |     |     |     |     |     | yes |
| ENSG00000119321 |     |     |     |     |     | yes |
| ENSG00000150991 |     |     |     |     | yes |     |
| ENSG00000083750 |     |     |     |     | yes |     |
| ENSG00000130402 |     |     |     |     |     | yes |
| ENSG00000182108 |     |     |     |     |     | yes |
| ENSG00000111540 |     |     | yes |     |     | yes |
| ENSG00000148110 | yes | yes | yes |     |     |     |
| ENSG00000172915 |     |     |     |     | yes |     |
| ENSG00000186807 |     | yes |     | yes | yes |     |
| ENSG00000110848 | yes |     | yes | yes |     | yes |
| ENSG00000197136 |     |     |     |     |     | yes |
| ENSG00000123689 |     | yes | yes | yes | yes |     |
| ENSG00000163516 | yes |     |     | yes | yes |     |
| ENSG00000134463 |     |     |     |     |     | yes |
| ENSG00000139192 |     |     |     |     |     | yes |
| ENSG00000158555 | yes |     |     |     | yes |     |
| ENSG00000130066 | yes |     |     | yes | yes |     |
| ENSG00000116761 |     |     | yes |     |     |     |
| ENSG00000188636 | yes | yes | yes |     |     |     |
| ENSG00000214655 |     | yes |     |     |     |     |
| ENSG00000145703 | yes |     |     | yes | yes |     |
| ENSG00000185518 | yes |     |     | yes | yes |     |
| ENSG00000120802 | yes |     |     | yes | yes |     |
| ENSG00000185262 |     |     |     | yes | yes |     |
| ENSG00000243477 |     |     |     |     |     | yes |
| ENSG00000109452 | yes |     |     | yes | yes |     |
| ENSG00000102580 |     |     |     |     |     | yes |
| ENSG00000171540 |     |     |     | yes | yes |     |
| ENSG00000060069 |     |     |     |     |     | yes |
| ENSG00000040633 |     |     |     |     |     | yes |
| ENSG00000105640 |     |     |     |     |     | yes |

|                 |     |     |     |     |     |     |
|-----------------|-----|-----|-----|-----|-----|-----|
| ENSG0000099991  |     |     |     |     |     | yes |
| ENSG00000133321 |     |     |     | yes | yes |     |
| ENSG00000111275 |     |     | yes |     |     |     |
| ENSG00000115073 |     |     |     | yes |     |     |
| ENSG00000121413 |     | yes |     |     |     | yes |
| ENSG00000171861 |     |     |     |     |     | yes |
| ENSG00000167617 |     | yes | yes | yes | yes | yes |
| ENSG00000091317 | yes |     |     | yes |     |     |
| ENSG00000077232 |     |     |     |     | yes |     |
| ENSG00000148339 | yes |     |     |     |     |     |
| ENSG00000154040 | yes | yes |     | yes | yes |     |
| ENSG00000135842 | yes | yes | yes | yes | yes |     |
| ENSG00000139117 | yes | yes | yes | yes | yes |     |
| ENSG00000061656 | yes |     |     | yes | yes |     |
| ENSG00000189050 |     |     |     | yes |     |     |
| ENSG00000188042 | yes |     |     | yes | yes |     |
| ENSG00000175567 |     |     | yes |     |     | yes |
| ENSG00000140995 |     |     |     | yes |     | yes |
| ENSG00000172716 |     |     |     | yes |     |     |
| ENSG00000137571 | yes |     | yes |     |     | yes |
| ENSG00000116014 | yes |     |     | yes | yes |     |
| ENSG00000178951 | yes |     |     | yes |     |     |
| ENSG00000162896 | yes | yes | yes |     |     | yes |
| ENSG00000129636 |     |     |     |     |     | yes |
| ENSG00000176401 |     |     | yes |     |     |     |
| ENSG00000197635 | yes |     |     |     |     |     |
| ENSG00000196072 |     | yes |     |     |     |     |
| ENSG00000126246 | yes |     |     | yes | yes |     |
| ENSG00000221886 |     |     |     |     |     | yes |
| ENSG00000198034 |     |     |     |     |     | yes |
| ENSG00000171612 | yes |     | yes |     |     |     |
| ENSG00000100592 |     |     | yes |     |     | yes |
| ENSG00000037897 |     |     | yes |     |     | yes |
| ENSG00000102445 |     |     | yes |     |     | yes |
| ENSG00000162545 |     | yes |     |     |     | yes |
| ENSG00000110237 | yes |     |     | yes |     |     |
| ENSG00000174903 |     |     |     |     |     | yes |
| ENSG00000138744 |     |     |     | yes |     |     |
| ENSG00000181577 |     |     |     |     |     | yes |
| ENSG00000197050 |     | yes |     |     |     |     |
| ENSG00000125534 |     | yes | yes |     |     | yes |
| ENSG00000117408 |     |     |     |     |     | yes |
| ENSG00000138172 |     |     |     |     |     | yes |
| ENSG00000184825 |     | yes |     |     |     | yes |
| ENSG00000168016 | yes |     |     | yes |     |     |
| ENSG00000162924 |     | yes | yes |     |     |     |
| ENSG00000173917 |     |     |     | yes | yes |     |
| ENSG00000220205 |     |     | yes |     |     | yes |
| ENSG00000109321 |     |     |     | yes |     | yes |
| ENSG00000102981 |     | yes |     |     |     |     |
| ENSG00000117410 |     |     |     |     |     | yes |
| ENSG00000144724 |     |     |     |     | yes |     |
| ENSG00000131788 |     | yes |     |     |     |     |
| ENSG00000165502 |     | yes |     |     |     |     |

|                 |     |     |     |     |     |     |
|-----------------|-----|-----|-----|-----|-----|-----|
| ENSG00000123610 |     | yes |     |     |     | yes |
| ENSG00000120053 | yes |     |     |     |     |     |
| ENSG00000159147 | yes |     |     | yes | yes |     |
| ENSG00000078081 |     |     |     |     |     | yes |
| ENSG00000188130 |     |     |     |     |     | yes |
| ENSG00000105655 |     |     |     | yes |     | yes |
| ENSG00000141994 | yes |     | yes |     |     | yes |
| ENSG00000172270 |     |     | yes |     |     | yes |
| ENSG00000179119 |     |     | yes |     |     |     |
| ENSG00000136560 | yes |     |     |     |     |     |
| ENSG00000163071 | yes |     | yes | yes | yes | yes |
| ENSG00000146416 |     | yes | yes | yes | yes | yes |
| ENSG00000120539 |     |     |     |     | yes | yes |
| ENSG00000196636 |     | yes |     |     |     |     |
| ENSG00000175215 |     | yes |     |     |     |     |
| ENSG00000147862 |     |     |     |     | yes |     |
| ENSG00000177606 |     |     | yes |     |     |     |
| ENSG00000183726 |     |     |     |     | yes |     |
| ENSG00000203813 |     | yes |     |     |     |     |
| ENSG00000132434 | yes |     |     | yes | yes |     |
| ENSG00000125910 | yes | yes | yes | yes |     | yes |
| ENSG00000148444 |     | yes |     |     |     |     |
| ENSG00000214517 |     |     |     | yes |     | yes |
| ENSG00000213516 | yes |     | yes |     |     |     |
| ENSG00000074370 | yes |     |     |     |     |     |
| ENSG00000175606 | yes |     |     | yes | yes |     |
| ENSG00000182551 |     | yes | yes |     |     |     |
| ENSG00000151779 |     |     |     | yes |     | yes |
| ENSG00000161677 |     |     |     |     |     | yes |
| ENSG00000167552 |     |     |     |     | yes |     |
| ENSG00000237441 |     |     | yes |     |     |     |
| ENSG00000146242 |     | yes | yes | yes | yes |     |
| ENSG00000181035 |     | yes | yes |     |     |     |
| ENSG00000186889 |     |     |     |     |     | yes |
| ENSG00000175115 |     |     | yes |     |     | yes |
| ENSG00000105559 |     |     |     | yes |     |     |
| ENSG00000188486 |     |     |     | yes |     | yes |
| ENSG00000135686 |     | yes |     |     |     |     |
| ENSG00000100116 |     | yes | yes |     |     |     |
| ENSG00000073756 |     |     |     | yes |     |     |
| ENSG00000182389 | yes |     |     | yes | yes | yes |
| ENSG00000166831 | yes | yes | yes |     |     | yes |
| ENSG00000160959 |     |     |     | yes | yes |     |
| ENSG00000105229 |     |     |     |     |     | yes |
| ENSG00000113742 | yes |     |     | yes | yes |     |
| ENSG00000004975 |     |     |     |     |     | yes |
| ENSG00000027869 | yes |     | yes | yes | yes | yes |
| ENSG00000126391 |     |     |     | yes |     | yes |
| ENSG00000124299 |     |     |     |     |     | yes |
| ENSG00000152128 |     |     |     | yes | yes |     |
| ENSG00000171766 |     | yes | yes | yes |     | yes |
| ENSG00000133104 |     | yes |     |     |     |     |
| ENSG00000164930 |     |     | yes | yes | yes |     |
| ENSG00000004059 |     |     |     |     |     | yes |

|                 |     |     |     |     |     |     |
|-----------------|-----|-----|-----|-----|-----|-----|
| ENSG00000152749 |     | yes |     |     |     |     |
| ENSG00000148516 | yes |     |     | yes | yes |     |
| ENSG00000162817 | yes | yes |     | yes | yes | yes |
| ENSG00000133454 | yes | yes |     |     | yes | yes |
| ENSG00000039523 | yes |     |     | yes |     | yes |
| ENSG00000145908 | yes |     | yes | yes |     | yes |
| ENSG00000248541 |     |     | yes |     | yes | yes |
| ENSG00000110944 |     | yes |     | yes |     |     |
| ENSG00000091972 | yes |     | yes | yes | yes | yes |
| ENSG00000172466 | yes |     | yes |     |     |     |
| ENSG00000146859 | yes |     |     | yes | yes |     |
| ENSG00000130813 |     | yes |     |     |     |     |
| ENSG00000119599 |     | yes | yes |     |     |     |
| ENSG00000187325 | yes |     |     | yes | yes | yes |
| ENSG00000137936 | yes | yes |     | yes | yes | yes |
| ENSG00000117479 | yes |     |     |     |     |     |
| ENSG00000168421 | yes |     |     |     |     |     |
| ENSG00000170955 | yes |     |     | yes | yes |     |
| ENSG00000089820 |     | yes |     |     |     | yes |
| ENSG00000158517 | yes | yes |     |     |     |     |
| ENSG00000135046 |     | yes |     |     |     | yes |
| ENSG00000121083 |     |     |     |     |     | yes |
| ENSG00000025708 |     | yes |     | yes | yes |     |
| ENSG00000059378 |     | yes |     | yes | yes |     |
| ENSG00000140379 |     |     | yes |     |     |     |
| ENSG00000168899 | yes |     |     | yes | yes |     |
| ENSG00000171865 |     |     |     |     |     | yes |
| ENSG00000072818 | yes |     | yes | yes |     | yes |
| ENSG00000175048 | yes | yes | yes |     |     |     |
| ENSG00000061918 |     | yes | yes | yes |     |     |
| ENSG00000091129 | yes |     |     | yes | yes |     |
| ENSG00000171467 |     |     |     |     |     | yes |
| ENSG00000132005 |     |     |     |     |     | yes |
| ENSG00000179588 |     |     | yes |     |     | yes |
| ENSG00000141424 | yes |     |     | yes |     |     |
| ENSG00000112306 |     | yes |     |     |     | yes |
| ENSG00000155093 | yes | yes |     | yes | yes |     |
| ENSG00000160584 |     |     |     | yes |     |     |
| ENSG00000196793 |     | yes | yes |     |     |     |
| ENSG00000090054 | yes | yes | yes |     |     |     |
| ENSG00000140400 | yes |     |     | yes |     | yes |
| ENSG00000127418 |     | yes | yes | yes | yes |     |
| ENSG00000188315 | yes |     |     |     |     |     |
| ENSG00000167895 | yes |     |     |     |     |     |
| ENSG00000143614 |     |     | yes |     |     | yes |
| ENSG00000146674 | yes |     |     | yes | yes |     |
| ENSG00000051620 | yes | yes | yes | yes | yes |     |
| ENSG00000130204 |     | yes |     |     |     |     |
| ENSG00000185404 |     |     | yes |     |     | yes |
| ENSG00000071889 |     |     |     |     |     | yes |
| ENSG00000141753 |     | yes |     | yes |     | yes |
| ENSG00000137710 |     |     |     |     |     | yes |
| ENSG00000138297 | yes |     | yes |     |     |     |
| ENSG00000130956 | yes | yes | yes |     |     |     |

|                 |     |     |     |     |     |     |
|-----------------|-----|-----|-----|-----|-----|-----|
| ENSG00000105397 |     |     |     |     |     | yes |
| ENSG00000127423 | yes |     |     |     |     |     |
| ENSG00000132361 | yes |     | yes |     |     |     |
| ENSG00000103932 |     |     |     | yes |     |     |
| ENSG00000174871 | yes |     |     |     | yes |     |
| ENSG00000026297 | yes |     |     | yes | yes | yes |
| ENSG00000110876 | yes |     |     | yes | yes |     |
| ENSG00000179603 |     | yes | yes |     |     |     |
| ENSG00000154153 | yes |     |     | yes |     | yes |
| ENSG00000198087 |     |     |     |     |     | yes |
| ENSG00000181788 |     | yes | yes | yes | yes |     |
| ENSG00000157224 |     |     |     | yes |     |     |
| ENSG00000126705 |     |     |     |     |     | yes |
| ENSG00000111863 | yes | yes |     |     |     |     |
| ENSG00000042493 |     | yes |     | yes |     | yes |
| ENSG00000174083 | yes |     |     | yes |     | yes |
| ENSG00000162373 | yes |     |     | yes | yes |     |
| ENSG00000125753 |     |     |     |     |     | yes |
| ENSG00000176788 | yes |     |     | yes | yes |     |
| ENSG00000105849 |     |     | yes |     |     |     |
| ENSG00000187699 |     | yes | yes |     |     |     |
| ENSG00000148655 |     |     |     | yes | yes |     |
| ENSG00000100473 | yes |     | yes | yes |     |     |
| ENSG00000197061 |     |     |     |     | yes | yes |
| ENSG00000112294 | yes |     |     | yes | yes |     |
| ENSG00000112406 |     | yes |     |     |     |     |
| ENSG00000154319 | yes | yes | yes |     | yes | yes |
| ENSG00000242185 | yes | yes |     | yes | yes | yes |
| ENSG00000196189 |     | yes | yes |     |     |     |
| ENSG00000067533 | yes |     | yes |     |     |     |
| ENSG00000136280 | yes | yes |     |     |     | yes |
| ENSG00000134717 |     |     |     |     |     | yes |
| ENSG00000056736 |     |     | yes |     | yes | yes |
| ENSG00000090520 |     |     |     |     |     | yes |
| ENSG00000033867 |     | yes |     | yes |     | yes |
| ENSG00000142684 |     |     | yes |     |     |     |
| ENSG00000184368 | yes |     | yes | yes |     | yes |
| ENSG00000169692 |     |     |     |     | yes |     |
| ENSG00000160179 |     | yes | yes | yes | yes | yes |
| ENSG00000168517 |     | yes |     |     |     |     |
| ENSG00000107281 |     |     |     | yes | yes |     |
| ENSG00000183742 |     | yes | yes |     |     |     |
| ENSG00000083828 |     | yes |     |     |     |     |
| ENSG00000060339 |     |     |     | yes | yes |     |
| ENSG00000111843 |     |     | yes |     |     |     |
| ENSG00000180357 |     |     |     |     |     | yes |
| ENSG00000196968 | yes |     |     | yes |     |     |
| ENSG00000092607 |     |     | yes |     | yes | yes |
| ENSG00000187735 |     | yes | yes |     |     |     |
| ENSG00000088038 |     |     |     |     |     | yes |
| ENSG00000102554 |     |     |     | yes | yes |     |
| ENSG00000128928 |     | yes |     |     |     |     |
| ENSG00000127125 |     |     |     |     |     | yes |
| ENSG00000213722 |     |     |     | yes |     |     |

|                 |     |     |     |     |     |     |
|-----------------|-----|-----|-----|-----|-----|-----|
| ENSG00000143624 | yes |     |     | yes |     | yes |
| ENSG00000143185 |     |     | yes | yes | yes | yes |
| ENSG00000148926 | yes |     |     | yes | yes | yes |
| ENSG00000248098 |     |     |     | yes |     | yes |
| ENSG00000151327 | yes | yes |     |     |     |     |
| ENSG00000091542 | yes | yes |     |     |     |     |
| ENSG00000163378 | yes |     |     | yes | yes |     |
| ENSG00000127989 |     |     | yes |     |     |     |
| ENSG00000176225 |     |     |     |     |     | yes |
| ENSG00000198825 |     |     |     | yes | yes |     |
| ENSG00000115946 | yes | yes | yes |     |     |     |
| ENSG00000115902 |     | yes |     | yes | yes |     |
| ENSG00000067082 | yes |     |     | yes | yes |     |
| ENSG00000089195 | yes |     | yes | yes |     | yes |
| ENSG00000171163 |     |     |     | yes |     | yes |
| ENSG00000157303 | yes |     |     | yes | yes |     |
| ENSG00000120868 | yes |     | yes | yes |     | yes |
| ENSG00000187134 |     |     |     |     | yes |     |
| ENSG00000119471 |     |     |     |     | yes | yes |
| ENSG00000168374 |     |     | yes |     |     |     |
| ENSG00000183963 |     |     |     |     |     | yes |
| ENSG00000197019 |     |     | yes |     |     |     |
| ENSG00000089116 |     | yes |     | yes |     | yes |
| ENSG00000116560 | yes |     |     | yes |     |     |
| ENSG00000142192 | yes |     |     | yes | yes |     |
| ENSG00000145050 |     |     |     |     |     | yes |
| ENSG00000138160 |     |     |     | yes |     |     |
| ENSG00000181458 | yes |     |     | yes | yes |     |
| ENSG00000177030 |     |     |     |     |     | yes |
| ENSG00000132965 | yes |     |     | yes | yes |     |
| ENSG00000132635 | yes |     |     |     |     |     |
| ENSG00000171793 | yes |     |     |     |     |     |
| ENSG00000142655 |     |     |     |     |     | yes |
| ENSG00000158615 |     |     | yes |     |     |     |
| ENSG00000106689 | yes |     | yes | yes | yes | yes |
| ENSG00000138640 |     |     |     |     |     | yes |
| ENSG00000114200 | yes |     |     |     | yes |     |
| ENSG00000136286 | yes |     |     | yes | yes | yes |
| ENSG00000136877 |     |     |     | yes |     | yes |
| ENSG00000133874 | yes | yes |     |     |     | yes |
| ENSG00000100298 |     | yes | yes |     |     |     |
| ENSG00000130812 | yes |     |     | yes | yes | yes |
| ENSG00000131002 |     | yes | yes |     |     |     |
| ENSG00000157654 |     |     |     | yes | yes |     |
| ENSG00000139926 |     | yes | yes | yes | yes |     |
| ENSG00000114268 | yes |     |     | yes | yes |     |
| ENSG00000142541 |     | yes |     |     |     | yes |
| ENSG00000074842 |     |     |     |     |     | yes |
| ENSG00000184117 |     |     |     |     |     | yes |
| ENSG00000120942 |     |     |     |     |     | yes |
| ENSG00000101161 | yes | yes | yes |     |     |     |
| ENSG00000135736 |     |     |     | yes | yes |     |
| ENSG00000160271 |     |     |     | yes |     | yes |
| ENSG00000144642 | yes |     |     |     | yes |     |

|                 |     |     |     |     |     |     |
|-----------------|-----|-----|-----|-----|-----|-----|
| ENSG00000168916 |     |     | yes |     |     | yes |
| ENSG00000164002 |     |     |     |     |     | yes |
| ENSG00000167562 |     | yes | yes |     |     |     |
| ENSG00000124529 |     |     | yes |     | yes | yes |
| ENSG00000117228 |     |     |     | yes | yes |     |
| ENSG00000159176 |     |     |     |     |     | yes |
| ENSG00000108479 |     |     |     | yes |     |     |
| ENSG00000104325 |     | yes |     |     |     |     |
| ENSG00000158089 |     | yes |     |     |     |     |
| ENSG00000138823 |     | yes |     | yes |     |     |
| ENSG00000163002 | yes | yes | yes |     |     |     |
| ENSG00000147874 | yes |     |     |     |     |     |
| ENSG00000196365 |     |     |     | yes |     | yes |
| ENSG00000102524 |     |     |     |     |     | yes |
| ENSG00000175826 | yes |     |     | yes | yes |     |
| ENSG00000197586 |     |     |     | yes |     |     |
| ENSG00000067248 | yes |     |     |     |     |     |
| ENSG00000244405 | yes |     |     | yes | yes |     |
| ENSG00000012817 | yes | yes | yes |     |     |     |
| ENSG00000173085 |     |     | yes |     |     |     |
| ENSG00000106701 | yes |     |     | yes | yes |     |
| ENSG00000175029 | yes |     |     | yes | yes |     |
| ENSG00000111729 | yes | yes | yes |     |     |     |
| ENSG00000175040 |     |     |     | yes |     |     |
| ENSG00000137673 |     | yes | yes | yes | yes | yes |
| ENSG00000164116 |     | yes | yes | yes |     |     |
| ENSG00000106789 | yes | yes | yes |     |     |     |
| ENSG00000204852 | yes |     |     |     | yes |     |
| ENSG00000029725 | yes |     |     | yes | yes |     |
| ENSG00000106538 | yes | yes |     |     | yes | yes |
| ENSG00000052749 | yes | yes | yes |     |     |     |
| ENSG00000164691 | yes |     |     |     |     |     |
| ENSG00000183558 | yes |     |     | yes | yes |     |
| ENSG00000198431 | yes |     | yes |     |     | yes |
| ENSG00000183688 | yes |     |     |     | yes |     |
| ENSG00000130508 | yes |     |     | yes | yes | yes |
| ENSG00000214063 |     | yes |     |     |     |     |
| ENSG00000108829 |     |     | yes |     |     |     |
| ENSG00000115657 |     |     |     | yes |     |     |
| ENSG00000187840 |     | yes |     |     |     |     |
| ENSG00000213977 |     |     | yes |     |     |     |
| ENSG00000182979 |     |     |     |     |     | yes |
| ENSG00000213930 | yes |     |     |     |     |     |
| ENSG00000111880 | yes | yes | yes |     |     |     |
| ENSG00000090971 |     |     |     |     |     | yes |
| ENSG00000170385 |     |     | yes |     |     | yes |
| ENSG00000184867 |     |     |     |     |     | yes |
| ENSG00000137040 | yes |     | yes |     |     |     |
| ENSG00000184009 | yes | yes |     |     |     |     |
| ENSG00000134184 | yes | yes | yes | yes |     | yes |
| ENSG00000072694 |     |     | yes |     |     |     |
| ENSG00000198356 |     |     |     |     |     | yes |
| ENSG00000050820 |     |     | yes |     |     | yes |
| ENSG00000130844 |     |     |     | yes | yes |     |



|                 |     |  |     |     |     |     |
|-----------------|-----|--|-----|-----|-----|-----|
| ENSG00000162368 |     |  | yes |     | yes |     |
| ENSG00000164442 |     |  |     |     | yes |     |
| ENSG00000137875 |     |  | yes |     |     |     |
| ENSG00000179041 | yes |  |     | yes |     |     |
| ENSG00000165389 |     |  |     |     |     | yes |
| ENSG00000129824 | yes |  | yes | yes |     |     |
| ENSG00000127481 |     |  |     |     |     | yes |
| ENSG00000213780 |     |  |     |     |     | yes |
| ENSG00000182552 |     |  |     |     |     | yes |
| ENSG00000179886 |     |  |     | yes |     | yes |
| ENSG00000136536 | yes |  |     | yes |     |     |
| ENSG00000072849 |     |  |     |     |     | yes |
| ENSG00000108433 |     |  |     | yes |     |     |
| ENSG00000172432 |     |  |     | yes |     | yes |
| ENSG00000155542 | yes |  |     | yes | yes |     |
| ENSG00000116918 |     |  |     | yes |     |     |
| ENSG00000158050 | yes |  |     | yes | yes |     |
| ENSG00000080824 | yes |  |     | yes |     |     |
| ENSG00000211456 |     |  | yes | yes |     |     |
| ENSG00000179715 |     |  | yes | yes |     |     |
| ENSG00000165782 |     |  |     |     | yes | yes |
| ENSG00000169403 |     |  | yes | yes |     |     |
| ENSG00000134779 |     |  |     | yes |     |     |
| ENSG00000137168 | yes |  |     |     |     |     |
| ENSG00000129028 |     |  |     | yes | yes |     |
| ENSG00000120738 | yes |  |     | yes | yes | yes |
| ENSG00000185418 |     |  |     | yes |     |     |
| ENSG00000183828 | yes |  |     | yes |     | yes |
| ENSG00000105438 | yes |  |     | yes |     | yes |
| ENSG00000171700 | yes |  | yes |     |     |     |
| ENSG00000105825 |     |  | yes |     |     | yes |
| ENSG00000132465 | yes |  |     | yes | yes | yes |
| ENSG00000225697 | yes |  |     | yes |     | yes |
| ENSG00000100596 |     |  |     | yes |     |     |
| ENSG00000140391 | yes |  |     |     | yes |     |
| ENSG00000112727 |     |  |     | yes | yes | yes |
| ENSG00000107537 | yes |  | yes | yes |     |     |
| ENSG00000133142 |     |  |     |     | yes |     |
| ENSG00000140553 |     |  |     | yes |     |     |
| ENSG00000107485 |     |  | yes |     |     | yes |
| ENSG00000019582 |     |  |     | yes |     |     |
| ENSG00000138032 | yes |  |     | yes | yes |     |
| ENSG00000167703 |     |  |     |     |     | yes |
| ENSG00000160953 |     |  |     | yes |     | yes |
| ENSG00000184575 | yes |  |     | yes |     |     |
| ENSG00000100348 |     |  | yes |     |     |     |
| ENSG00000163938 |     |  |     | yes |     |     |
| ENSG00000113657 |     |  |     | yes |     |     |
| ENSG00000133275 |     |  |     |     |     | yes |
| ENSG00000135074 |     |  | yes | yes |     |     |
| ENSG00000116005 |     |  |     |     |     | yes |
| ENSG00000106733 |     |  | yes | yes |     |     |
| ENSG00000101544 | yes |  | yes | yes |     |     |
| ENSG00000170345 |     |  |     |     |     | yes |

|                 |     |     |     |     |     |     |
|-----------------|-----|-----|-----|-----|-----|-----|
| ENSG00000140368 | yes |     | yes | yes |     | yes |
| ENSG00000016391 |     |     |     |     |     | yes |
| ENSG00000171813 |     |     |     | yes |     |     |
| ENSG00000076003 | yes |     |     |     |     |     |
| ENSG00000151651 |     |     |     | yes |     | yes |
| ENSG00000152804 |     | yes |     | yes |     |     |
| ENSG00000186998 | yes | yes | yes |     |     |     |
| ENSG00000180879 |     |     |     |     |     | yes |
| ENSG00000136237 |     |     | yes |     |     |     |
| ENSG00000142583 | yes | yes | yes | yes | yes |     |
| ENSG00000108395 |     |     |     |     | yes |     |
| ENSG00000175643 |     | yes | yes | yes | yes |     |
| ENSG00000138755 |     |     | yes |     | yes |     |
| ENSG00000134762 | yes |     |     | yes | yes |     |
| ENSG00000001084 | yes |     |     | yes | yes |     |
| ENSG00000143891 |     |     |     | yes | yes |     |
| ENSG00000168395 | yes |     | yes |     |     |     |
| ENSG00000164080 |     |     |     |     |     | yes |
| ENSG00000133116 |     | yes | yes |     | yes |     |
| ENSG00000178773 |     |     |     | yes |     |     |
| ENSG00000164163 | yes |     | yes |     |     |     |
| ENSG00000165732 | yes |     | yes |     |     |     |
| ENSG00000115526 | yes | yes |     |     |     |     |
| ENSG00000136783 |     |     |     |     |     | yes |
| ENSG00000103507 | yes |     |     | yes |     | yes |
| ENSG00000131446 | yes |     |     |     |     |     |
| ENSG00000139263 | yes | yes |     | yes | yes | yes |
| ENSG00000187837 |     |     |     | yes | yes |     |
| ENSG00000107959 | yes |     |     | yes | yes | yes |
| ENSG00000159256 | yes |     |     |     | yes |     |
| ENSG00000119906 |     |     |     |     |     | yes |
| ENSG00000165996 | yes |     |     | yes | yes | yes |
| ENSG00000158716 | yes | yes |     |     | yes | yes |
| ENSG00000172992 |     |     | yes |     |     | yes |
| ENSG00000175183 |     |     |     | yes |     | yes |
| ENSG00000154917 |     |     |     |     |     | yes |
| ENSG00000173540 |     |     |     |     |     | yes |
| ENSG00000135245 | yes |     | yes | yes | yes | yes |
| ENSG00000143494 | yes |     |     | yes | yes |     |
| ENSG00000128309 |     |     | yes |     |     |     |
| ENSG00000109654 |     |     |     |     |     | yes |
| ENSG00000100605 |     |     |     | yes |     | yes |
| ENSG00000126947 | yes |     |     |     |     |     |
| ENSG00000167136 |     |     | yes |     |     |     |
| ENSG00000149218 | yes |     | yes | yes | yes |     |
| ENSG00000197903 |     |     | yes | yes | yes | yes |
| ENSG00000227500 |     |     | yes |     |     |     |
| ENSG00000080503 | yes |     | yes | yes | yes |     |
| ENSG00000073282 | yes |     |     | yes |     |     |
| ENSG00000184937 |     | yes |     |     |     |     |
| ENSG00000177494 |     |     | yes |     |     |     |
| ENSG00000104055 | yes | yes | yes | yes | yes |     |
| ENSG00000135069 | yes |     | yes |     |     |     |
| ENSG00000111490 |     |     |     | yes | yes |     |

|                 |     |     |     |     |     |     |
|-----------------|-----|-----|-----|-----|-----|-----|
| ENSG00000157110 |     |     | yes | yes |     | yes |
| ENSG00000134986 |     |     |     |     |     | yes |
| ENSG00000234745 | yes |     |     |     |     |     |
| ENSG00000138777 | yes |     |     | yes | yes |     |
| ENSG00000130158 | yes |     |     | yes |     |     |
| ENSG00000182752 |     |     |     |     |     | yes |
| ENSG00000079387 | yes |     |     |     |     |     |
| ENSG00000144476 | yes | yes | yes |     | yes | yes |
| ENSG00000139832 | yes |     |     | yes | yes |     |
| ENSG00000169554 | yes |     |     |     | yes |     |
| ENSG00000158373 |     |     | yes |     |     | yes |
| ENSG00000187764 | yes |     |     |     |     |     |
| ENSG00000198900 | yes |     |     |     |     |     |
| ENSG00000116044 |     | yes | yes |     |     |     |
| ENSG00000168763 | yes |     |     | yes |     |     |
| ENSG00000071127 |     |     |     | yes |     |     |
| ENSG00000129932 |     |     | yes |     |     | yes |
| ENSG00000133243 |     | yes |     |     |     |     |
| ENSG00000167996 |     |     |     |     | yes |     |
| ENSG00000164056 | yes |     | yes | yes |     | yes |
| ENSG00000092036 | yes |     |     |     |     |     |
| ENSG00000136859 | yes |     |     | yes |     |     |
| ENSG00000138411 | yes | yes | yes | yes | yes | yes |
| ENSG00000196586 |     |     | yes |     |     | yes |
| ENSG00000133398 |     |     | yes |     |     | yes |
| ENSG00000099817 |     | yes | yes |     | yes |     |
| ENSG00000150995 |     |     |     | yes |     |     |
| ENSG00000137491 |     | yes |     |     |     |     |
| ENSG00000111752 |     |     |     |     | yes | yes |
| ENSG00000110713 | yes |     | yes |     |     |     |
| ENSG00000101079 |     |     |     |     |     | yes |
| ENSG00000214897 |     |     | yes |     |     | yes |
| ENSG00000183856 |     |     |     |     |     | yes |
| ENSG00000173905 |     |     | yes |     |     |     |
| ENSG00000141446 |     | yes |     |     |     |     |
| ENSG00000074706 | yes |     | yes | yes |     | yes |
| ENSG00000100644 | yes |     |     | yes | yes |     |
| ENSG00000142102 | yes |     | yes | yes |     |     |
| ENSG00000139372 | yes |     |     |     |     |     |
| ENSG00000008516 |     |     |     |     | yes |     |
| ENSG00000169220 |     |     |     |     |     | yes |
| ENSG00000183741 |     |     |     |     |     | yes |
| ENSG00000031691 |     | yes |     |     |     |     |
| ENSG00000173198 |     |     |     | yes | yes |     |
| ENSG00000198873 | yes |     |     | yes | yes |     |
| ENSG00000143641 |     | yes |     |     |     |     |
| ENSG00000163069 | yes |     |     | yes | yes |     |
| ENSG00000153029 |     | yes |     |     |     |     |
| ENSG00000119878 |     | yes | yes |     |     |     |
| ENSG00000121858 | yes |     |     | yes | yes |     |
| ENSG00000198374 |     |     |     |     |     | yes |
| ENSG00000239713 |     |     |     |     | yes |     |
| ENSG00000163872 | yes |     | yes | yes |     | yes |
| ENSG00000089127 | yes | yes | yes | yes | yes | yes |

|                 |     |     |     |     |     |     |
|-----------------|-----|-----|-----|-----|-----|-----|
| ENSG00000172590 |     |     |     | yes |     |     |
| ENSG00000153814 |     |     | yes |     |     |     |
| ENSG00000112773 |     | yes | yes |     |     |     |
| ENSG00000118939 |     |     |     | yes |     |     |
| ENSG00000243364 |     |     |     | yes |     |     |
| ENSG00000182087 |     |     |     | yes |     |     |
| ENSG00000076201 |     |     |     |     |     | yes |
| ENSG00000144655 |     |     |     | yes | yes |     |
| ENSG00000090372 |     |     |     |     |     | yes |
| ENSG00000005844 | yes |     |     | yes | yes |     |
| ENSG00000160741 |     |     |     |     |     | yes |
| ENSG00000100201 | yes | yes | yes |     |     |     |
| ENSG00000075643 |     | yes | yes |     | yes |     |
| ENSG00000112303 |     |     |     | yes |     |     |
| ENSG00000143184 |     |     | yes | yes | yes | yes |
| ENSG00000127947 | yes |     |     | yes |     |     |
| ENSG00000166557 |     |     |     |     |     | yes |
| ENSG00000168488 | yes |     |     | yes |     | yes |
| ENSG00000206418 |     |     | yes |     |     | yes |
| ENSG00000138190 |     | yes |     | yes | yes |     |
| ENSG00000185811 |     |     |     |     |     | yes |
| ENSG00000089775 | yes |     |     | yes | yes |     |
| ENSG00000162433 |     |     | yes |     |     |     |
| ENSG00000196177 | yes |     |     | yes | yes |     |
| ENSG00000163297 | yes | yes | yes |     |     |     |
| ENSG00000071564 |     |     | yes |     |     | yes |
| ENSG00000104312 |     | yes | yes |     |     |     |
| ENSG00000168906 |     |     | yes |     |     | yes |
| ENSG00000163568 | yes | yes |     | yes | yes | yes |
| ENSG00000204569 |     | yes |     |     |     |     |
| ENSG00000163864 |     | yes | yes |     |     |     |
| ENSG00000083097 |     |     |     |     |     | yes |
| ENSG00000128973 |     | yes |     | yes |     | yes |
| ENSG00000128604 |     |     | yes |     |     | yes |
| ENSG00000176974 |     | yes |     |     |     |     |
| ENSG00000159618 | yes | yes |     | yes | yes |     |
| ENSG00000074696 | yes |     |     | yes | yes |     |
| ENSG00000173674 | yes |     |     |     |     |     |
| ENSG00000120949 |     |     |     |     |     | yes |
| ENSG00000112561 |     |     | yes |     |     | yes |
| ENSG00000103145 |     |     |     | yes |     |     |
| ENSG00000156876 |     | yes |     |     |     |     |
| ENSG00000198551 |     |     |     |     |     | yes |
| ENSG00000136840 |     |     |     |     |     | yes |
| ENSG00000137642 |     |     | yes |     |     | yes |
| ENSG00000126243 |     | yes | yes |     |     |     |
| ENSG00000196507 |     |     |     |     | yes |     |
| ENSG00000145414 |     | yes |     |     |     | yes |
| ENSG00000186810 | yes | yes |     |     | yes | yes |
| ENSG00000068489 |     | yes |     |     |     | yes |
| ENSG00000114978 | yes |     |     | yes | yes |     |
| ENSG00000121957 |     | yes |     |     |     |     |
| ENSG00000198477 |     |     |     |     |     | yes |
| ENSG00000134755 | yes |     |     | yes | yes |     |

|                 |     |     |     |     |     |     |
|-----------------|-----|-----|-----|-----|-----|-----|
| ENSG00000240505 | yes |     |     | yes | yes |     |
| ENSG00000171234 |     | yes | yes | yes | yes |     |
| ENSG00000130479 |     | yes |     | yes |     | yes |
| ENSG00000064651 | yes |     |     |     |     |     |
| ENSG00000178403 | yes | yes |     | yes | yes |     |
| ENSG00000197776 |     |     | yes |     |     |     |
| ENSG00000170412 | yes |     |     | yes | yes |     |
| ENSG00000204388 |     | yes | yes | yes |     |     |
| ENSG00000111674 | yes |     |     | yes | yes |     |
| ENSG00000163041 |     |     | yes |     |     | yes |
| ENSG00000186891 |     | yes | yes | yes | yes | yes |
| ENSG00000111670 |     | yes |     |     |     |     |
| ENSG00000171763 |     | yes | yes |     |     |     |
| ENSG00000104765 | yes |     |     |     |     |     |
| ENSG00000179598 |     | yes | yes |     | yes | yes |
| ENSG00000116641 |     |     |     |     |     | yes |
| ENSG00000156170 | yes |     |     |     | yes |     |
| ENSG00000178163 |     | yes |     |     |     |     |
| ENSG00000180354 |     |     |     |     |     | yes |
| ENSG00000112796 |     |     |     |     |     | yes |
| ENSG00000197006 |     |     |     |     |     | yes |
| ENSG00000141985 |     |     | yes | yes |     | yes |
| ENSG00000152795 | yes |     |     |     |     |     |
| ENSG00000180626 |     |     |     |     | yes | yes |
| ENSG00000136040 |     | yes |     |     |     |     |
| ENSG00000131116 |     | yes |     | yes |     |     |
| ENSG00000171659 |     |     |     | yes | yes |     |
| ENSG00000065911 |     | yes | yes |     |     |     |
| ENSG00000197705 |     |     |     |     | yes |     |
| ENSG00000112964 | yes |     |     | yes | yes |     |
| ENSG00000188763 |     | yes | yes |     |     |     |
| ENSG00000168067 |     | yes |     |     |     |     |
| ENSG00000099804 |     |     |     |     |     | yes |
| ENSG00000166986 |     |     |     |     |     | yes |
| ENSG00000092978 | yes |     |     |     | yes |     |
| ENSG00000172164 | yes | yes | yes |     |     |     |
| ENSG00000163666 |     | yes |     |     |     |     |
| ENSG00000223496 | yes |     |     |     |     |     |
| ENSG00000124693 |     |     | yes |     |     | yes |
| ENSG00000145936 | yes | yes |     |     |     |     |
| ENSG00000110851 |     |     | yes |     |     | yes |
| ENSG00000180616 |     | yes |     |     |     | yes |
| ENSG00000160299 |     |     |     |     |     | yes |
| ENSG00000110651 |     | yes |     |     |     | yes |
| ENSG00000178150 |     |     |     |     | yes |     |
| ENSG00000131844 | yes |     |     |     |     |     |
| ENSG00000102265 |     |     |     |     | yes |     |
| ENSG00000113108 | yes |     |     | yes |     |     |
| ENSG00000060709 | yes |     |     | yes | yes |     |
| ENSG00000127074 |     | yes | yes | yes | yes | yes |
| ENSG00000104490 |     | yes | yes | yes | yes | yes |
| ENSG00000169230 |     | yes | yes |     |     |     |
| ENSG00000142409 | yes |     | yes | yes | yes | yes |
| ENSG00000115368 |     | yes |     |     |     |     |

|                 |     |     |     |     |     |     |
|-----------------|-----|-----|-----|-----|-----|-----|
| ENSG00000165175 | yes |     |     | yes |     | yes |
| ENSG00000099308 | yes |     | yes | yes |     | yes |
| ENSG00000129667 | yes |     |     | yes | yes |     |
| ENSG00000169435 |     |     |     | yes |     |     |
| ENSG00000159556 | yes |     | yes |     |     | yes |
| ENSG00000164414 |     |     | yes |     |     |     |
| ENSG00000164674 | yes |     |     | yes | yes |     |
| ENSG00000105928 |     | yes | yes | yes | yes |     |
| ENSG00000140044 |     | yes |     |     |     |     |
| ENSG00000127863 | yes |     | yes | yes | yes | yes |
| ENSG00000148840 | yes |     | yes |     |     |     |
| ENSG00000059122 |     |     |     |     |     | yes |
| ENSG00000137094 |     |     |     |     | yes | yes |
| ENSG00000186431 |     |     |     | yes |     | yes |
| ENSG00000114993 | yes |     |     | yes | yes | yes |
| ENSG00000137216 |     |     |     |     |     | yes |
| ENSG00000010292 | yes | yes | yes |     |     |     |
| ENSG00000179958 |     |     | yes |     |     |     |
| ENSG00000154146 | yes |     |     | yes |     |     |
| ENSG00000173110 |     | yes |     | yes |     | yes |
| ENSG00000164934 | yes |     |     |     |     |     |
| ENSG00000130193 |     |     |     |     |     | yes |
| ENSG00000133943 |     |     | yes |     |     |     |
| ENSG00000189319 | yes |     |     | yes | yes |     |
| ENSG00000135316 | yes |     |     | yes |     |     |
| ENSG00000170231 |     |     |     |     | yes | yes |
| ENSG00000125459 | yes |     | yes | yes |     | yes |
| ENSG00000151929 |     |     |     | yes | yes |     |
| ENSG00000176165 | yes |     |     | yes | yes |     |
| ENSG00000047634 | yes |     | yes |     |     | yes |
| ENSG00000106080 |     |     |     |     |     | yes |
| ENSG00000160113 |     | yes | yes |     |     |     |
| ENSG00000215440 |     | yes | yes | yes |     |     |
| ENSG00000132912 |     | yes |     |     |     |     |
| ENSG00000189409 |     | yes | yes |     |     |     |
| ENSG00000165030 | yes |     |     | yes | yes |     |
| ENSG00000164221 |     | yes | yes | yes | yes |     |
| ENSG00000185163 |     | yes |     |     |     |     |
| ENSG00000125245 |     | yes |     |     |     | yes |
| ENSG00000154328 |     |     |     | yes |     |     |
| ENSG00000116679 | yes |     | yes | yes |     | yes |
| ENSG00000153283 | yes |     | yes |     |     |     |
| ENSG00000155115 |     |     |     | yes |     |     |
| ENSG00000197846 |     |     | yes |     | yes | yes |
| ENSG00000141682 |     |     | yes |     |     |     |
| ENSG00000140332 | yes |     |     | yes |     |     |
| ENSG00000197905 | yes |     | yes | yes |     | yes |
| ENSG00000110921 |     |     |     |     |     | yes |
| ENSG00000183337 |     |     |     | yes | yes |     |
| ENSG00000174500 |     | yes | yes | yes | yes |     |
| ENSG00000178078 |     |     |     |     | yes |     |
| ENSG00000132329 |     |     |     |     |     | yes |
| ENSG00000115457 |     | yes | yes | yes | yes |     |
| ENSG00000169660 | yes |     |     | yes | yes |     |

|                 |     |     |     |     |     |     |
|-----------------|-----|-----|-----|-----|-----|-----|
| ENSG00000117289 | yes | yes | yes |     | yes | yes |
| ENSG00000169925 |     |     |     |     |     | yes |
| ENSG00000049249 |     | yes |     |     |     |     |
| ENSG00000065833 | yes | yes | yes | yes | yes |     |
| ENSG00000204371 |     |     |     |     |     | yes |
| ENSG00000137731 |     | yes |     |     |     |     |
| ENSG00000181061 | yes |     |     |     |     |     |
| ENSG00000179262 |     |     |     |     |     | yes |
| ENSG00000204463 |     |     |     | yes |     | yes |
| ENSG00000102786 | yes |     | yes |     |     |     |
| ENSG00000057019 | yes |     |     | yes | yes |     |
| ENSG00000090097 |     |     | yes |     |     | yes |
| ENSG00000104331 |     |     |     |     |     | yes |
| ENSG00000147443 |     |     |     | yes | yes |     |
| ENSG00000120899 | yes |     | yes | yes |     | yes |
| ENSG00000104774 |     |     |     |     |     | yes |
| ENSG00000160284 | yes | yes | yes | yes | yes |     |
| ENSG00000176393 |     |     |     |     |     | yes |
| ENSG00000048162 |     |     | yes |     |     | yes |
| ENSG00000071655 |     |     |     | yes |     | yes |
| ENSG00000162594 |     | yes |     | yes |     |     |
| ENSG00000145416 |     |     |     |     |     | yes |
| ENSG00000173621 |     | yes |     | yes |     |     |
| ENSG00000163346 |     | yes |     | yes |     | yes |
| ENSG00000162607 | yes |     |     |     |     |     |
| ENSG00000163479 |     |     |     |     |     | yes |
| ENSG00000006075 | yes |     |     |     |     |     |
| ENSG00000157326 |     | yes | yes |     |     |     |
| ENSG00000161813 | yes |     | yes | yes |     |     |
| ENSG00000142694 | yes | yes | yes |     |     |     |
| ENSG00000135077 | yes |     |     | yes | yes | yes |
| ENSG00000144354 |     |     | yes |     |     |     |
| ENSG00000125868 |     |     |     |     |     | yes |
| ENSG00000186350 | yes |     |     | yes | yes |     |
| ENSG00000136842 | yes |     |     | yes | yes |     |
| ENSG00000151208 |     | yes | yes | yes | yes |     |
| ENSG00000050405 |     | yes |     |     |     |     |
| ENSG00000162623 | yes |     |     | yes |     |     |
| ENSG00000035720 | yes |     |     | yes | yes |     |
| ENSG00000142178 |     |     |     | yes | yes |     |
| ENSG00000164683 |     |     |     |     |     | yes |
| ENSG00000177181 | yes | yes |     | yes | yes |     |
| ENSG00000134709 |     | yes |     | yes |     | yes |
| ENSG00000180104 |     |     |     | yes |     |     |
| ENSG00000148341 |     |     | yes |     |     | yes |
| ENSG00000167785 | yes |     |     | yes |     | yes |
| ENSG00000130707 |     | yes | yes |     |     |     |
| ENSG00000164983 | yes |     |     | yes | yes |     |
| ENSG00000196781 |     | yes |     |     |     | yes |
| ENSG00000123933 |     | yes |     | yes | yes |     |
| ENSG00000113638 |     |     |     |     |     | yes |
| ENSG00000104267 | yes |     | yes | yes |     | yes |
| ENSG00000223865 |     | yes |     |     |     |     |
| ENSG00000176273 | yes |     |     |     |     |     |

|                 |     |     |     |     |     |     |
|-----------------|-----|-----|-----|-----|-----|-----|
| ENSG0000006062  |     |     | yes |     |     |     |
| ENSG00000157782 | yes |     |     |     |     |     |
| ENSG00000139352 |     | yes | yes | yes | yes |     |
| ENSG00000129351 | yes |     |     | yes | yes |     |
| ENSG00000075651 |     | yes | yes |     | yes |     |
| ENSG00000123892 |     |     | yes |     | yes | yes |
| ENSG00000182224 | yes |     |     |     |     |     |
| ENSG00000178209 |     | yes | yes |     |     |     |
| ENSG00000100744 | yes |     |     | yes | yes |     |
| ENSG00000243989 |     |     |     |     |     | yes |
| ENSG00000240972 |     |     |     |     | yes |     |
| ENSG00000198464 | yes |     |     |     |     |     |
| ENSG00000092758 | yes |     |     | yes | yes |     |
| ENSG00000146094 |     |     |     | yes |     |     |
| ENSG00000171914 | yes |     |     | yes | yes |     |
| ENSG00000221823 |     | yes |     |     |     |     |
| ENSG00000174123 |     | yes |     |     |     |     |
| ENSG00000198856 |     |     |     |     |     | yes |
| ENSG00000185215 |     | yes | yes |     |     |     |
| ENSG00000105246 |     |     |     | yes |     |     |
| ENSG00000176903 |     | yes |     |     |     |     |
| ENSG00000188021 |     |     |     |     |     | yes |
| ENSG00000148290 |     | yes |     |     |     |     |
| ENSG00000068971 | yes |     |     | yes | yes | yes |
| ENSG00000187189 | yes |     |     |     |     |     |
| ENSG00000039068 |     | yes |     | yes |     | yes |
| ENSG00000137575 |     | yes |     | yes | yes |     |
| ENSG00000179388 | yes | yes | yes | yes | yes |     |
| ENSG00000163082 |     |     | yes | yes | yes |     |
| ENSG00000013563 | yes |     | yes | yes |     |     |
| ENSG00000148175 |     |     | yes |     |     |     |
| ENSG00000029363 | yes |     |     |     |     |     |
| ENSG00000136158 |     |     | yes |     | yes | yes |
| ENSG00000198369 |     |     |     |     | yes |     |
| ENSG00000159433 | yes |     |     | yes |     |     |
| ENSG00000131981 |     |     |     | yes |     | yes |
| ENSG00000169592 |     |     |     |     |     | yes |
| ENSG00000118308 |     | yes | yes |     |     |     |
| ENSG00000135452 |     | yes |     |     |     |     |
| ENSG00000106404 |     |     | yes |     |     |     |
| ENSG00000168461 |     | yes | yes |     | yes |     |
| ENSG00000115008 |     | yes | yes |     |     |     |
| ENSG00000103245 |     |     |     | yes |     |     |
| ENSG00000123427 |     | yes | yes | yes |     |     |
| ENSG00000162733 | yes |     |     | yes | yes |     |
| ENSG00000083444 |     |     |     |     | yes | yes |
| ENSG00000137841 | yes |     | yes |     |     | yes |
| ENSG00000159216 |     | yes |     | yes | yes |     |
| ENSG00000197619 |     |     | yes |     |     |     |
| ENSG00000171298 |     |     |     | yes |     |     |
| ENSG00000165169 |     |     |     |     |     | yes |
| ENSG00000091127 | yes |     |     |     |     |     |
| ENSG00000180549 | yes | yes | yes | yes | yes |     |
| ENSG00000038427 |     | yes |     |     |     | yes |



|                 |     |     |     |     |     |     |
|-----------------|-----|-----|-----|-----|-----|-----|
| ENSG00000198771 |     | yes | yes |     |     |     |
| ENSG00000070087 |     | yes | yes | yes | yes |     |
| ENSG00000134775 | yes | yes | yes | yes | yes |     |
| ENSG00000118495 |     | yes | yes | yes |     | yes |
| ENSG00000146757 |     |     |     |     |     | yes |
| ENSG00000100290 |     | yes | yes | yes | yes |     |
| ENSG00000153774 |     | yes | yes |     |     |     |
| ENSG00000159111 |     |     |     |     |     | yes |
| ENSG00000151092 |     |     |     | yes | yes |     |
| ENSG00000092929 |     |     |     | yes |     | yes |
| ENSG00000008952 |     |     |     |     |     | yes |
| ENSG00000137166 |     |     |     |     | yes | yes |
| ENSG00000100316 |     |     |     |     |     | yes |
| ENSG00000140563 | yes |     |     | yes | yes |     |
| ENSG00000138061 | yes | yes | yes | yes | yes |     |
| ENSG00000075131 | yes |     |     |     |     |     |
| ENSG00000133794 | yes |     |     |     |     |     |
| ENSG00000174374 |     | yes | yes |     |     |     |
| ENSG00000158321 | yes |     |     | yes | yes |     |
| ENSG00000104881 | yes |     |     | yes |     |     |
| ENSG00000187193 |     |     | yes |     | yes | yes |
| ENSG00000140743 |     |     | yes |     |     |     |
| ENSG00000141258 |     |     |     |     |     | yes |
| ENSG00000205364 |     |     | yes |     |     |     |
| ENSG00000188846 | yes | yes | yes |     |     |     |
| ENSG00000100372 | yes |     |     | yes | yes |     |
| ENSG00000168071 | yes | yes |     |     |     | yes |
| ENSG00000151835 | yes |     |     |     | yes |     |
| ENSG00000146072 | yes | yes |     |     | yes | yes |
| ENSG00000160767 |     |     |     | yes |     | yes |
| ENSG00000179134 |     |     |     |     |     | yes |
| ENSG00000115548 | yes |     | yes |     |     |     |
| ENSG00000185624 | yes |     |     |     | yes |     |
| ENSG00000105875 |     |     |     | yes | yes |     |
| ENSG00000092051 | yes |     |     |     |     |     |
| ENSG00000130653 |     |     | yes |     |     |     |
| ENSG00000183093 |     |     |     |     |     | yes |
| ENSG00000169155 |     |     | yes |     |     |     |
| ENSG00000145247 |     |     |     |     | yes |     |
| ENSG00000182253 |     | yes |     | yes |     | yes |
| ENSG00000197932 |     |     |     | yes |     |     |
| ENSG00000130675 | yes | yes |     | yes | yes | yes |
| ENSG00000124256 | yes | yes |     |     | yes | yes |
| ENSG00000060762 |     |     |     |     | yes |     |
| ENSG00000128886 |     | yes |     | yes |     | yes |
| ENSG00000120334 |     |     |     | yes |     | yes |
| ENSG00000164292 |     | yes |     | yes | yes | yes |
| ENSG00000148288 | yes | yes |     | yes | yes | yes |
| ENSG00000134324 |     | yes | yes | yes | yes |     |
| ENSG00000143155 | yes |     |     |     |     |     |
| ENSG00000147852 | yes |     | yes | yes |     | yes |
| ENSG00000104998 |     |     |     |     |     | yes |
| ENSG00000175938 | yes |     | yes |     |     | yes |
| ENSG00000125538 |     | yes | yes |     |     |     |

|                 |     |     |     |     |     |     |
|-----------------|-----|-----|-----|-----|-----|-----|
| ENSG00000107902 | yes | yes | yes |     |     |     |
| ENSG00000196182 |     |     |     |     |     | yes |
| ENSG00000165983 | yes | yes | yes |     |     |     |
| ENSG00000173200 |     | yes | yes | yes | yes |     |
| ENSG00000115163 | yes |     |     | yes |     |     |
| ENSG00000077420 | yes |     |     | yes |     | yes |
| ENSG00000103257 |     |     | yes |     |     | yes |
| ENSG00000126456 |     |     |     | yes |     | yes |
| ENSG00000196976 |     | yes | yes |     |     |     |
| ENSG00000010072 | yes |     |     | yes |     |     |
| ENSG00000132530 |     |     | yes |     |     |     |
| ENSG00000146828 |     | yes |     |     |     |     |
| ENSG00000122729 |     |     |     |     |     | yes |
| ENSG00000152332 |     |     |     |     |     | yes |
| ENSG00000115514 | yes |     |     |     | yes |     |
| ENSG00000196456 |     | yes |     |     |     |     |
| ENSG00000178445 |     |     | yes | yes | yes | yes |
| ENSG00000092964 | yes |     | yes | yes | yes | yes |
| ENSG00000113504 | yes | yes | yes | yes | yes |     |
| ENSG00000101210 |     | yes |     | yes | yes | yes |
| ENSG00000172070 |     | yes | yes |     |     |     |
| ENSG00000196418 |     |     | yes |     |     | yes |
| ENSG00000136231 |     |     | yes |     | yes | yes |
| ENSG00000140682 |     |     |     | yes |     | yes |
| ENSG00000146083 |     |     |     |     |     | yes |
| ENSG00000141401 | yes |     |     | yes | yes |     |
| ENSG00000198331 |     |     |     | yes |     |     |
| ENSG00000134748 | yes |     |     |     |     |     |
| ENSG00000124787 | yes |     |     |     |     |     |
| ENSG00000177675 |     | yes | yes |     |     |     |
| ENSG00000184014 |     |     |     |     | yes | yes |
| ENSG00000109790 |     |     |     | yes | yes |     |
| ENSG00000160213 |     | yes | yes |     |     |     |
| ENSG00000183570 |     |     | yes |     | yes | yes |
| ENSG00000112079 | yes |     |     |     |     |     |
| ENSG00000160094 | yes |     |     |     | yes | yes |
| ENSG00000026950 | yes |     |     | yes |     |     |
| ENSG00000123983 |     | yes |     | yes |     | yes |
| ENSG00000123908 |     | yes |     |     |     | yes |
| ENSG00000164938 | yes | yes | yes |     |     |     |
| ENSG00000064703 | yes |     |     | yes |     |     |
| ENSG00000126821 |     |     |     | yes |     |     |
| ENSG00000183722 | yes |     |     | yes | yes |     |
| ENSG00000198836 | yes |     |     |     | yes |     |
| ENSG00000167770 |     |     | yes |     |     | yes |
| ENSG00000167283 | yes |     |     | yes | yes |     |
| ENSG00000104904 | yes |     |     |     | yes |     |
| ENSG00000166839 | yes | yes | yes | yes | yes |     |
| ENSG00000203896 |     | yes |     | yes |     | yes |
| ENSG00000014257 |     | yes |     | yes |     |     |
| ENSG00000132128 |     | yes |     |     |     |     |
| ENSG00000183486 |     | yes |     | yes |     | yes |
| ENSG00000023445 |     | yes |     | yes |     | yes |
| ENSG00000117395 | yes |     |     |     |     |     |

|                 |     |     |     |     |     |     |
|-----------------|-----|-----|-----|-----|-----|-----|
| ENSG00000108953 |     |     |     |     |     | yes |
| ENSG00000027697 | yes |     |     |     |     |     |
| ENSG00000122873 |     | yes |     |     |     |     |
| ENSG00000177721 | yes | yes | yes |     |     |     |
| ENSG00000213413 | yes |     |     | yes | yes |     |
| ENSG00000112282 |     |     |     |     |     | yes |
| ENSG00000204394 |     | yes |     |     |     |     |
| ENSG00000126460 |     | yes |     |     |     | yes |
| ENSG00000044574 | yes |     |     | yes |     |     |
| ENSG00000137076 |     |     | yes |     |     | yes |
| ENSG00000100647 |     |     | yes |     |     |     |
| ENSG00000167799 |     |     |     |     |     | yes |
| ENSG00000182481 | yes |     |     | yes |     | yes |
| ENSG00000160326 | yes |     |     | yes | yes |     |
| ENSG00000139725 |     |     |     |     |     | yes |
| ENSG00000090861 |     |     |     |     |     | yes |
| ENSG00000048462 |     | yes |     |     |     | yes |
| ENSG00000113369 |     |     | yes |     |     |     |
| ENSG00000110455 |     | yes |     | yes |     | yes |
| ENSG00000004468 | yes |     | yes | yes | yes | yes |
| ENSG00000139505 | yes |     |     | yes | yes |     |
| ENSG00000196821 |     |     |     | yes |     |     |
| ENSG00000112659 |     |     |     |     |     | yes |
| ENSG00000066926 |     | yes | yes |     | yes |     |
| ENSG00000134255 | yes |     | yes | yes | yes |     |
| ENSG00000100813 |     |     |     |     |     | yes |
| ENSG00000162227 |     |     |     | yes |     |     |
| ENSG00000105516 |     |     |     | yes |     |     |
| ENSG00000130222 |     | yes |     |     |     |     |
| ENSG00000155363 |     |     |     | yes |     | yes |
| ENSG00000124920 |     |     | yes |     | yes |     |
| ENSG00000125629 | yes |     |     | yes | yes |     |
| ENSG00000109107 | yes |     |     | yes | yes |     |
| ENSG00000185432 | yes |     |     | yes |     | yes |
| ENSG00000228300 |     |     | yes |     |     | yes |
| ENSG00000148384 |     |     |     |     |     | yes |
| ENSG00000099917 | yes |     |     | yes |     | yes |
| ENSG00000135048 | yes |     |     | yes | yes |     |
| ENSG00000178809 | yes |     |     | yes | yes |     |
| ENSG00000174837 |     | yes | yes | yes | yes |     |
| ENSG00000159363 |     |     | yes |     |     |     |
| ENSG00000010278 | yes |     |     | yes | yes |     |
| ENSG00000011009 |     |     |     |     |     | yes |
| ENSG00000102317 | yes |     |     |     |     |     |
| ENSG00000104808 | yes | yes | yes |     |     |     |
| ENSG00000144118 |     | yes | yes |     |     |     |
| ENSG00000066294 | yes |     |     |     |     |     |
| ENSG00000136463 |     |     |     |     |     | yes |
| ENSG00000213672 | yes |     |     | yes | yes |     |
| ENSG00000179604 |     |     |     |     |     | yes |
| ENSG00000110777 | yes |     |     |     |     |     |
| ENSG00000120742 |     |     |     |     |     | yes |
| ENSG00000169398 | yes |     |     |     | yes | yes |
| ENSG00000136830 |     | yes |     | yes |     | yes |

|                 |     |     |     |     |     |     |
|-----------------|-----|-----|-----|-----|-----|-----|
| ENSG0000026751  |     |     |     |     |     | yes |
| ENSG00000165490 | yes | yes |     |     |     |     |
| ENSG0000059804  | yes |     |     | yes | yes |     |
| ENSG0000088882  | yes |     | yes | yes | yes | yes |
| ENSG00000117009 | yes |     |     | yes | yes |     |
| ENSG00000121594 |     | yes |     |     |     | yes |
| ENSG00000132603 | yes |     | yes |     |     | yes |
| ENSG00000184489 | yes |     |     | yes | yes |     |
| ENSG00000205038 |     | yes | yes |     |     |     |
| ENSG00000104824 |     |     |     |     |     | yes |
| ENSG00000139687 |     | yes |     |     |     |     |
| ENSG00000197409 |     |     |     |     |     | yes |
| ENSG00000102760 | yes |     | yes | yes | yes | yes |
| ENSG00000123815 |     |     |     |     |     | yes |
| ENSG00000181751 |     | yes |     |     |     |     |
| ENSG00000108622 |     |     | yes | yes | yes |     |
| ENSG00000174600 |     | yes |     |     |     |     |
| ENSG00000135916 |     |     | yes | yes | yes |     |
| ENSG0000064886  | yes |     | yes | yes | yes | yes |
| ENSG00000174799 |     |     |     |     |     | yes |
| ENSG00000157036 | yes |     |     | yes | yes |     |
| ENSG00000151792 |     | yes |     | yes | yes |     |
| ENSG00000118762 |     |     |     |     | yes | yes |
| ENSG00000115138 | yes |     |     |     |     |     |
| ENSG00000107201 |     |     |     |     |     | yes |
| ENSG00000132388 |     |     |     | yes |     | yes |
| ENSG00000124766 | yes | yes | yes |     |     |     |
| ENSG00000177465 |     |     |     | yes | yes |     |
| ENSG00000168297 |     | yes |     |     |     |     |
| ENSG00000168209 | yes |     | yes | yes |     | yes |
| ENSG00000138794 | yes |     |     | yes |     |     |
| ENSG00000243156 | yes | yes |     |     | yes |     |
| ENSG00000130303 |     | yes |     |     |     |     |
| ENSG00000149262 | yes |     |     |     |     |     |
| ENSG00000140612 |     | yes |     |     |     | yes |
| ENSG00000239697 |     |     | yes |     |     | yes |
| ENSG00000136021 | yes |     |     | yes | yes |     |
| ENSG0000082213  |     |     |     | yes |     |     |
| ENSG00000158806 |     |     |     |     |     | yes |
| ENSG00000079313 |     |     |     |     |     | yes |
| ENSG00000165025 | yes | yes |     |     | yes |     |
| ENSG00000221995 | yes |     | yes | yes |     | yes |
| ENSG00000153989 |     |     | yes |     |     |     |
| ENSG00000148296 | yes | yes | yes |     |     |     |
| ENSG00000124120 | yes |     |     |     | yes |     |
| ENSG00000165475 |     |     |     |     |     | yes |
| ENSG00000166012 |     |     | yes |     |     |     |
| ENSG00000105270 |     | yes | yes | yes | yes |     |
| ENSG00000121310 |     | yes | yes | yes | yes |     |
| ENSG0000089486  |     | yes | yes |     |     |     |
| ENSG00000170542 |     |     |     | yes |     |     |
| ENSG00000168827 | yes |     |     |     |     |     |
| ENSG00000139370 |     |     | yes |     |     | yes |
| ENSG00000188739 |     |     |     |     | yes | yes |

|                 |     |     |     |     |     |     |
|-----------------|-----|-----|-----|-----|-----|-----|
| ENSG00000169429 |     | yes | yes | yes | yes |     |
| ENSG00000186470 | yes |     |     | yes | yes |     |
| ENSG00000197728 | yes | yes | yes |     |     |     |
| ENSG00000100029 | yes |     | yes |     |     | yes |
| ENSG00000141564 |     |     | yes |     |     |     |
| ENSG00000125484 |     |     | yes |     |     |     |
| ENSG00000134285 |     |     | yes |     |     | yes |
| ENSG00000111913 | yes | yes |     |     |     |     |
| ENSG00000139793 |     |     |     | yes | yes |     |
| ENSG00000125454 |     | yes |     |     |     |     |
| ENSG00000143198 |     | yes | yes |     |     |     |
| ENSG00000082269 |     |     |     |     |     | yes |
| ENSG00000159720 | yes | yes |     |     |     |     |
| ENSG00000178719 | yes |     |     | yes |     | yes |
| ENSG00000104524 | yes |     |     | yes |     | yes |
| ENSG00000159210 |     |     |     |     |     | yes |
| ENSG00000169752 | yes |     |     | yes | yes |     |
| ENSG00000158711 | yes |     | yes |     |     |     |
| ENSG00000159753 |     |     |     |     |     | yes |
| ENSG00000142039 |     |     |     | yes |     |     |
| ENSG00000160183 | yes | yes |     | yes | yes |     |
| ENSG00000166226 |     |     | yes |     |     |     |
| ENSG00000136240 |     |     | yes |     |     | yes |
| ENSG00000175324 |     |     |     |     |     | yes |
| ENSG00000112378 | yes |     |     | yes | yes |     |
| ENSG00000156697 |     |     | yes |     |     |     |
| ENSG00000133195 |     |     |     |     |     | yes |
| ENSG00000197045 | yes |     |     |     |     |     |
| ENSG00000107815 | yes | yes | yes |     |     |     |
| ENSG00000171488 |     |     |     | yes | yes |     |
| ENSG00000077348 |     | yes |     | yes |     |     |
| ENSG00000205560 |     |     | yes |     |     | yes |
| ENSG00000021645 | yes | yes | yes | yes | yes |     |
| ENSG00000049656 |     |     |     | yes |     | yes |
| ENSG00000006125 |     |     |     |     |     | yes |
| ENSG00000124383 |     |     | yes |     |     |     |
| ENSG00000125445 |     |     | yes |     |     |     |
| ENSG00000086289 | yes |     | yes | yes | yes |     |
| ENSG00000128340 | yes |     |     | yes | yes |     |
| ENSG00000105369 | yes |     |     |     |     |     |
| ENSG00000152443 | yes |     |     |     |     |     |
| ENSG00000103316 | yes | yes | yes | yes | yes |     |
| ENSG00000183246 | yes | yes | yes |     |     |     |
| ENSG00000075711 |     |     |     | yes |     |     |
| ENSG00000204642 | yes |     |     |     |     |     |
| ENSG00000155660 |     | yes |     |     |     | yes |
| ENSG00000110660 |     |     | yes |     |     |     |
| ENSG00000100109 |     |     |     |     |     | yes |
| ENSG00000168003 |     | yes | yes |     |     |     |
| ENSG00000144488 |     | yes |     | yes |     |     |
| ENSG00000163629 | yes |     |     | yes | yes |     |
| ENSG00000142494 |     | yes | yes |     |     |     |
| ENSG00000157873 | yes |     |     | yes |     |     |
| ENSG00000100365 |     | yes |     |     |     | yes |

|                 |     |     |     |     |     |     |
|-----------------|-----|-----|-----|-----|-----|-----|
| ENSG0000025772  |     |     |     |     |     | yes |
| ENSG00000100097 | yes |     |     | yes | yes |     |
| ENSG00000132313 |     | yes |     |     |     |     |
| ENSG00000239789 |     |     | yes |     |     |     |
| ENSG00000188707 | yes |     |     | yes | yes |     |
| ENSG00000143110 | yes |     |     |     | yes | yes |
| ENSG00000198502 | yes | yes | yes | yes | yes | yes |
| ENSG00000100292 | yes |     | yes | yes |     | yes |
| ENSG00000124802 | yes |     |     |     |     |     |
| ENSG00000196329 | yes | yes | yes |     |     |     |
| ENSG00000152952 | yes |     |     | yes | yes |     |
| ENSG00000078061 |     |     |     |     |     | yes |
| ENSG00000104885 |     |     |     | yes |     | yes |
| ENSG00000092621 |     | yes | yes |     | yes | yes |
| ENSG00000117399 |     | yes | yes | yes |     | yes |
| ENSG00000172794 | yes | yes |     |     | yes | yes |
| ENSG00000241106 |     |     |     |     | yes | yes |
| ENSG00000197457 | yes | yes | yes |     |     |     |
| ENSG00000139174 | yes |     |     |     | yes |     |
| ENSG00000130595 | yes | yes | yes |     |     |     |
| ENSG00000108854 | yes | yes | yes |     |     |     |
| ENSG00000205336 |     |     |     |     |     | yes |
| ENSG00000112290 |     | yes |     | yes |     | yes |
| ENSG00000051108 |     |     | yes |     | yes |     |
| ENSG00000168246 | yes |     |     | yes | yes |     |
| ENSG00000015475 | yes | yes |     |     |     |     |
| ENSG00000135723 |     |     |     | yes |     |     |
| ENSG00000182013 |     |     | yes |     | yes |     |
| ENSG00000112658 |     |     | yes | yes |     | yes |
| ENSG00000076864 |     |     | yes |     | yes | yes |
| ENSG00000027847 |     |     |     |     |     | yes |
| ENSG00000147421 |     | yes | yes | yes | yes |     |
| ENSG00000159212 |     | yes | yes | yes | yes |     |
| ENSG00000196405 | yes |     | yes | yes | yes |     |
| ENSG00000119698 |     | yes | yes |     |     |     |
| ENSG00000197747 | yes | yes | yes |     |     |     |
| ENSG00000168242 |     |     | yes |     | yes | yes |
| ENSG00000051382 | yes |     |     |     |     |     |
| ENSG00000117139 | yes | yes |     | yes | yes |     |
| ENSG00000104131 | yes |     | yes |     |     |     |
| ENSG00000084234 | yes |     |     |     | yes | yes |
| ENSG00000102755 | yes | yes | yes |     |     |     |
| ENSG00000197070 |     |     |     | yes |     | yes |
| ENSG00000089327 | yes |     |     | yes | yes |     |
| ENSG00000117877 | yes |     | yes |     |     |     |
| ENSG00000217555 |     |     | yes |     | yes |     |
| ENSG00000100246 |     |     |     |     |     | yes |
| ENSG00000182568 |     |     |     | yes |     |     |
| ENSG00000197111 | yes |     |     |     |     |     |
| ENSG00000105127 |     |     |     | yes |     |     |
| ENSG00000165233 |     | yes | yes |     | yes |     |
| ENSG00000183010 |     | yes |     |     |     |     |
| ENSG00000018610 | yes |     |     |     |     |     |
| ENSG00000225932 |     | yes |     |     |     |     |

|                 |     |     |     |     |     |     |
|-----------------|-----|-----|-----|-----|-----|-----|
| ENSG0000036448  | yes | yes | yes |     |     |     |
| ENSG00000131051 |     |     |     | yes |     | yes |
| ENSG00000107719 | yes | yes | yes |     |     | yes |
| ENSG00000123159 |     |     | yes |     |     |     |
| ENSG00000103043 |     |     | yes |     |     |     |
| ENSG00000011590 | yes | yes |     | yes | yes | yes |
| ENSG00000114861 |     | yes |     |     |     | yes |
| ENSG00000161929 | yes | yes | yes |     |     |     |
| ENSG00000151465 |     |     |     |     |     | yes |
| ENSG00000064666 |     |     |     | yes |     | yes |
| ENSG00000130770 |     | yes | yes |     |     |     |
| ENSG00000054267 |     |     |     |     |     | yes |
| ENSG00000108375 |     | yes |     |     |     | yes |
| ENSG00000006453 | yes |     |     | yes | yes |     |
| ENSG00000168386 |     | yes |     | yes |     | yes |
| ENSG00000139737 |     |     | yes |     |     |     |
| ENSG00000151575 |     |     |     | yes | yes |     |
| ENSG00000138772 | yes |     |     |     | yes |     |
| ENSG00000179094 | yes | yes |     | yes | yes | yes |
| ENSG00000058272 | yes |     |     | yes | yes |     |
| ENSG00000102393 |     |     | yes |     | yes |     |
| ENSG00000100284 |     |     |     | yes |     |     |
| ENSG00000135862 | yes |     | yes | yes |     | yes |
| ENSG00000117318 | yes |     |     | yes |     |     |
| ENSG00000197461 |     | yes |     |     |     |     |
| ENSG00000133247 | yes |     |     | yes |     | yes |
| ENSG00000158158 |     |     |     | yes |     | yes |
| ENSG00000171130 | yes | yes | yes |     |     | yes |
| ENSG00000198911 | yes |     |     | yes |     |     |
| ENSG00000198816 |     | yes | yes | yes | yes |     |
| ENSG00000139410 |     | yes | yes |     |     |     |
| ENSG00000188404 |     | yes |     |     |     | yes |
| ENSG00000138678 |     |     |     |     |     | yes |
| ENSG00000204632 |     |     | yes |     |     | yes |
| ENSG00000136213 |     |     |     |     |     | yes |
| ENSG00000167930 |     |     |     |     |     | yes |
| ENSG00000121388 |     |     |     |     |     | yes |
| ENSG00000159423 |     |     |     |     |     | yes |
| ENSG00000089006 | yes |     | yes | yes |     | yes |
| ENSG00000144867 |     |     | yes |     |     | yes |
| ENSG00000197858 |     |     |     |     |     | yes |
| ENSG00000078596 | yes |     |     |     |     |     |
| ENSG00000141002 |     | yes |     |     |     | yes |
| ENSG00000108702 | yes |     |     |     |     |     |
| ENSG00000244754 | yes |     |     |     |     |     |
| ENSG00000170638 |     |     |     |     |     | yes |
| ENSG00000114013 |     | yes | yes | yes | yes |     |
| ENSG00000154767 |     | yes |     |     |     |     |
| ENSG00000078401 | yes |     |     | yes | yes |     |
| ENSG00000172339 | yes |     |     | yes |     |     |
| ENSG00000197170 | yes |     |     |     |     |     |
| ENSG00000179144 | yes | yes | yes |     |     |     |
| ENSG00000154237 |     | yes |     |     |     |     |
| ENSG00000117586 |     |     |     | yes | yes |     |

|                 |     |     |     |     |     |     |
|-----------------|-----|-----|-----|-----|-----|-----|
| ENSG00000183780 |     |     |     | yes | yes |     |
| ENSG00000054219 |     |     |     |     |     | yes |
| ENSG00000184905 | yes | yes |     | yes | yes | yes |
| ENSG00000152409 | yes | yes |     |     |     |     |
| ENSG00000120158 | yes |     |     |     |     |     |
| ENSG00000105499 | yes | yes | yes | yes | yes |     |
| ENSG00000187688 |     |     |     |     |     | yes |
| ENSG00000149557 | yes | yes |     |     | yes | yes |
| ENSG00000137331 |     | yes | yes |     |     |     |
| ENSG00000133997 | yes |     |     | yes |     |     |
| ENSG00000124357 | yes |     |     | yes |     |     |
| ENSG00000122224 |     |     | yes | yes | yes |     |
| ENSG00000198944 |     |     |     | yes | yes |     |
| ENSG00000230463 | yes | yes | yes | yes | yes | yes |
| ENSG00000181481 | yes | yes | yes |     |     |     |
| ENSG00000161249 | yes |     |     |     |     |     |
| ENSG00000239779 |     | yes |     |     |     |     |
| ENSG00000039560 |     |     |     |     | yes |     |
| ENSG00000170364 | yes |     |     |     |     |     |
| ENSG00000143772 |     |     | yes | yes | yes | yes |
| ENSG00000125354 |     |     |     |     |     | yes |
| ENSG00000182534 | yes | yes | yes |     |     |     |
| ENSG00000168961 |     |     |     |     |     | yes |
| ENSG00000132589 |     | yes |     | yes | yes |     |
| ENSG00000137513 |     | yes | yes |     |     |     |
| ENSG00000099958 | yes |     |     | yes | yes |     |
| ENSG00000160255 | yes |     |     | yes | yes |     |
| ENSG00000188060 | yes |     |     | yes |     | yes |
| ENSG00000196961 |     |     |     |     |     | yes |
| ENSG00000149541 |     |     |     |     |     | yes |
| ENSG00000185838 |     |     |     |     |     | yes |
| ENSG00000151967 |     |     |     |     | yes | yes |
| ENSG00000136878 |     |     |     |     |     | yes |
| ENSG00000162302 |     |     |     |     |     | yes |
| ENSG00000184640 | yes |     |     | yes | yes | yes |
| ENSG00000177189 | yes |     | yes |     |     |     |
| ENSG00000111331 | yes |     |     | yes | yes |     |
| ENSG00000064199 | yes |     |     |     | yes |     |
| ENSG00000168300 | yes |     | yes |     |     | yes |
| ENSG00000146833 |     | yes | yes |     |     |     |
| ENSG00000213626 | yes |     | yes |     |     | yes |
| ENSG00000151806 | yes |     |     |     |     |     |
| ENSG00000118454 | yes |     |     |     | yes |     |
| ENSG00000100650 | yes | yes |     |     | yes | yes |
| ENSG00000116514 |     |     |     |     |     | yes |
| ENSG00000198286 |     |     |     |     | yes | yes |
| ENSG00000100504 | yes |     |     |     | yes | yes |
| ENSG00000134910 |     |     |     |     | yes |     |
| ENSG00000172817 |     | yes | yes | yes | yes | yes |
| ENSG00000105447 |     | yes | yes |     |     |     |
| ENSG00000213402 | yes | yes |     |     |     |     |
| ENSG00000135045 |     |     |     |     |     | yes |
| ENSG00000151490 | yes |     |     | yes | yes |     |
| ENSG00000104936 |     |     |     |     | yes | yes |



|                 |     |     |     |     |     |     |
|-----------------|-----|-----|-----|-----|-----|-----|
| ENSG00000163154 |     |     |     | yes |     |     |
| ENSG00000213759 |     | yes | yes | yes | yes |     |
| ENSG00000163687 | yes | yes | yes | yes | yes |     |
| ENSG00000170571 |     | yes | yes |     | yes |     |
| ENSG00000239998 |     |     | yes |     |     |     |
| ENSG00000123700 | yes |     |     |     | yes |     |
| ENSG00000100376 |     | yes | yes |     |     |     |
| ENSG00000177548 |     | yes |     |     |     |     |
| ENSG00000197694 |     |     | yes | yes |     | yes |
| ENSG00000213741 |     |     |     |     |     | yes |
| ENSG00000171603 |     | yes |     |     |     |     |
| ENSG00000160410 |     |     |     |     |     | yes |
| ENSG00000079246 |     |     |     | yes |     |     |
| ENSG00000185728 | yes |     |     |     |     |     |
| ENSG00000064225 | yes |     | yes | yes | yes |     |
| ENSG00000179431 |     | yes | yes |     |     |     |
| ENSG00000184634 |     |     |     |     |     | yes |
| ENSG00000197153 |     |     | yes |     | yes | yes |
| ENSG00000184261 | yes |     |     | yes | yes |     |
| ENSG00000129521 |     |     |     | yes | yes |     |
| ENSG00000177879 | yes |     |     |     | yes |     |
| ENSG00000166068 | yes |     |     | yes | yes | yes |
| ENSG00000104972 | yes |     | yes | yes | yes |     |
| ENSG00000243244 |     |     |     |     |     | yes |
| ENSG00000008517 | yes | yes |     | yes | yes | yes |
| ENSG00000205213 |     |     |     | yes | yes |     |
| ENSG00000112473 |     |     |     |     |     | yes |
| ENSG00000131773 | yes |     |     | yes | yes |     |
| ENSG00000170043 |     |     |     |     |     | yes |
| ENSG00000008394 | yes | yes | yes |     | yes | yes |
| ENSG00000139722 | yes |     |     |     | yes | yes |
| ENSG00000188620 |     |     | yes | yes | yes |     |
| ENSG00000253729 |     |     |     |     | yes |     |
| ENSG00000149257 | yes |     |     | yes |     |     |
| ENSG00000204540 | yes |     | yes |     |     |     |

---
