# Supplementary material for: Insights into the regulation of human CNV-miRNAs from the view of their target genes
Source: PubMed Central journal article supplement (PMC3582595; doi:10.1186/1471-2164-13-707), 2012-12-18
Supplement: 1471-2164-13-707-S8.pdf [file 1471-2164-13-707-S8.pdf]

| <b>Species</b>         | <b>miRNA Family ID</b> | <b>miRNA</b>                   |
|------------------------|------------------------|--------------------------------|
| <i>Pan troglodytes</i> | MIPF0000007            | ptr-mir-181a-2; ptr-mir-181b-2 |
|                        | MIPF0000029            | ptr-mir-133a-2                 |
|                        | MIPF0000038            | ptr-mir-1-1                    |
|                        | MIPF0000042            | ptr-mir-204                    |
|                        | MIPF0000061            | ptr-mir-365-1                  |
|                        | MIPF0000082            | ptr-mir-193b                   |
|                        | MIPF0000163            | ptr-mir-320b-1                 |
|                        | MIPF0000219            | ptr-mir-484                    |
|                        | MIPF0000317            | ptr-mir-548i-4                 |
|                        | MIPF0000329            | ptr-mir-423                    |
|                        | MIPF0000445            | ptr-mir-1225                   |
|                        | MIPF0000456            | ptr-mir-1302-7                 |
|                        | MIPF0000465            | ptr-mir-661                    |
|                        | MIPF0000511            | ptr-mir-942                    |
|                        | MIPF0000553            | ptr-mir-618                    |
|                        | MIPF0000569            | ptr-mir-1244-4                 |
|                        | MIPF0000587            | ptr-mir-1282-1                 |
|                        | MIPF0000622            | ptr-mir-1248                   |
|                        | MIPF0000672            | ptr-mir-617                    |
|                        | MIPF0000689            | ptr-mir-1236                   |
| MIPF0000691            | ptr-mir-1293           |                                |
| <i>Mus musculus</i>    | GGAGACG                | mmu-miR-139-3p                 |
|                        | CUACAGU                | mmu-miR-139-5p                 |
|                        | UGAAAUG                | mmu-miR-203                    |
|                        | AUACAUA                | mmu-miR-297b-3p                |
|                        | UGUAUGU                | mmu-miR-297b-5p                |
|                        | AGCACCA                | mmu-miR-29b;mmu-miR-29c        |
|                        | GGCAUCU                | mmu-miR-680                    |
|                        | ACGCGGG                | mmu-miR-700                    |
